# Supplementary material
Source: ML conference proceedings conference paper supplement (https://proceedings.neurips.cc/paper_files/paper/2022/hash/57444e14ecd9e2c8f603b4f012ce3811-Abstract.html)
Supplement: Supplementary file 1 [file 57444e14ecd9e2c8f603b4f012ce3811-Supplemental-Conference.zip]

Archive with 319 entries (298 files):
- 3410_shield_decentralization_for_sa-Supplementary Material/
- __MACOSX/._3410_shield_decentralization_for_sa-Supplementary Material
- 3410_shield_decentralization_for_sa-Supplementary Material/maps/
- __MACOSX/3410_shield_decentralization_for_sa-Supplementary Material/._maps
- 3410_shield_decentralization_for_sa-Supplementary Material/run_batch.sh
- __MACOSX/3410_shield_decentralization_for_sa-Supplementary Material/._run_batch.sh
- 3410_shield_decentralization_for_sa-Supplementary Material/requirements.txt
- __MACOSX/3410_shield_decentralization_for_sa-Supplementary Material/._requirements.txt
- 3410_shield_decentralization_for_sa-Supplementary Material/shields/
- __MACOSX/3410_shield_decentralization_for_sa-Supplementary Material/._shields
- 3410_shield_decentralization_for_sa-Supplementary Material/experiments/
- __MACOSX/3410_shield_decentralization_for_sa-Supplementary Material/._experiments
- 3410_shield_decentralization_for_sa-Supplementary Material/.gitmodules
- __MACOSX/3410_shield_decentralization_for_sa-Supplementary Material/._.gitmodules
- 3410_shield_decentralization_for_sa-Supplementary Material/README
- __MACOSX/3410_shield_decentralization_for_sa-Supplementary Material/._README
- 3410_shield_decentralization_for_sa-Supplementary Material/Paper incl appendix.pdf
- __MACOSX/3410_shield_decentralization_for_sa-Supplementary Material/._Paper incl appendix.pdf
- 3410_shield_decentralization_for_sa-Supplementary Material/generate_shield.sh
- __MACOSX/3410_shield_decentralization_for_sa-Supplementary Material/._generate_shield.sh
- 3410_shield_decentralization_for_sa-Supplementary Material/create_zip.sh
- __MACOSX/3410_shield_decentralization_for_sa-Supplementary Material/._create_zip.sh
- 3410_shield_decentralization_for_sa-Supplementary Material/lib/
- __MACOSX/3410_shield_decentralization_for_sa-Supplementary Material/._lib
- 3410_shield_decentralization_for_sa-Supplementary Material/parallel_configs/
- __MACOSX/3410_shield_decentralization_for_sa-Supplementary Material/._parallel_configs
- 3410_shield_decentralization_for_sa-Supplementary Material/centralized_verification/
- __MACOSX/3410_shield_decentralization_for_sa-Supplementary Material/._centralized_verification
- 3410_shield_decentralization_for_sa-Supplementary Material/maps/ISR.png
- __MACOSX/3410_shield_decentralization_for_sa-Supplementary Material/maps/._ISR.png
- 3410_shield_decentralization_for_sa-Supplementary Material/maps/ISR.txt
- __MACOSX/3410_shield_decentralization_for_sa-Supplementary Material/maps/._ISR.txt
- 3410_shield_decentralization_for_sa-Supplementary Material/maps/Pentagon.png
- __MACOSX/3410_shield_decentralization_for_sa-Supplementary Material/maps/._Pentagon.png
- 3410_shield_decentralization_for_sa-Supplementary Material/maps/MIT.txt
- __MACOSX/3410_shield_decentralization_for_sa-Supplementary Material/maps/._MIT.txt
- 3410_shield_decentralization_for_sa-Supplementary Material/maps/example.txt
- __MACOSX/3410_shield_decentralization_for_sa-Supplementary Material/maps/._example.txt
- 3410_shield_decentralization_for_sa-Supplementary Material/maps/SUNY.png
- __MACOSX/3410_shield_decentralization_for_sa-Supplementary Material/maps/._SUNY.png
- 3410_shield_decentralization_for_sa-Supplementary Material/maps/Pentagon.txt
- __MACOSX/3410_shield_decentralization_for_sa-Supplementary Material/maps/._Pentagon.txt
- 3410_shield_decentralization_for_sa-Supplementary Material/maps/SUNY.txt
- __MACOSX/3410_shield_decentralization_for_sa-Supplementary Material/maps/._SUNY.txt
- 3410_shield_decentralization_for_sa-Supplementary Material/maps/MIT.png
- __MACOSX/3410_shield_decentralization_for_sa-Supplementary Material/maps/._MIT.png
- 3410_shield_decentralization_for_sa-Supplementary Material/shields/general_shield.structuredslugs
- __MACOSX/3410_shield_decentralization_for_sa-Supplementary Material/shields/._general_shield.structuredslugs
- 3410_shield_decentralization_for_sa-Supplementary Material/shields/general_shield_no_idle.structuredslugs
- __MACOSX/3410_shield_decentralization_for_sa-Supplementary Material/shields/._general_shield_no_idle.structuredslugs
- 3410_shield_decentralization_for_sa-Supplementary Material/shields/general_shield_small.structuredslugs
- __MACOSX/3410_shield_decentralization_for_sa-Supplementary Material/shields/._general_shield_small.structuredslugs
- 3410_shield_decentralization_for_sa-Supplementary Material/shields/momentum_shield_small.structuredslugs
- __MACOSX/3410_shield_decentralization_for_sa-Supplementary Material/shields/._momentum_shield_small.structuredslugs
- 3410_shield_decentralization_for_sa-Supplementary Material/shields/general_shield_radius.structuredslugs
- __MACOSX/3410_shield_decentralization_for_sa-Supplementary Material/shields/._general_shield_radius.structuredslugs
- 3410_shield_decentralization_for_sa-Supplementary Material/shields/particle_shield.structuredslugs
- __MACOSX/3410_shield_decentralization_for_sa-Supplementary Material/shields/._particle_shield.structuredslugs
- 3410_shield_decentralization_for_sa-Supplementary Material/shields/momentum_shield.structuredslugs
- __MACOSX/3410_shield_decentralization_for_sa-Supplementary Material/shields/._momentum_shield.structuredslugs
- 3410_shield_decentralization_for_sa-Supplementary Material/experiments/parallel/
- __MACOSX/3410_shield_decentralization_for_sa-Supplementary Material/experiments/._parallel
- 3410_shield_decentralization_for_sa-Supplementary Material/experiments/q_learning_1.py
- __MACOSX/3410_shield_decentralization_for_sa-Supplementary Material/experiments/._q_learning_1.py
- 3410_shield_decentralization_for_sa-Supplementary Material/experiments/analysis/
- __MACOSX/3410_shield_decentralization_for_sa-Supplementary Material/experiments/._analysis
- 3410_shield_decentralization_for_sa-Supplementary Material/experiments/__init__.py
- 3410_shield_decentralization_for_sa-Supplementary Material/experiments/utils/
- __MACOSX/3410_shield_decentralization_for_sa-Supplementary Material/experiments/._utils
- 3410_shield_decentralization_for_sa-Supplementary Material/experiments/q_learning_1_dec_shield.py
- __MACOSX/3410_shield_decentralization_for_sa-Supplementary Material/experiments/._q_learning_1_dec_shield.py
- 3410_shield_decentralization_for_sa-Supplementary Material/experiments/config_gen/
- __MACOSX/3410_shield_decentralization_for_sa-Supplementary Material/experiments/._config_gen
- 3410_shield_decentralization_for_sa-Supplementary Material/experiments/q_learning_1_no_shield.py
- __MACOSX/3410_shield_decentralization_for_sa-Supplementary Material/experiments/._q_learning_1_no_shield.py
- 3410_shield_decentralization_for_sa-Supplementary Material/lib/from_ingy/
- __MACOSX/3410_shield_decentralization_for_sa-Supplementary Material/lib/._from_ingy
- 3410_shield_decentralization_for_sa-Supplementary Material/parallel_configs/IndivQLearningSlugsConsistentOrderTrain.csv
- __MACOSX/3410_shield_decentralization_for_sa-Supplementary Material/parallel_configs/._IndivQLearningSlugsConsistentOrderTrain.csv
- 3410_shield_decentralization_for_sa-Supplementary Material/parallel_configs/IndivQLearningVar2.csv
- __MACOSX/3410_shield_decentralization_for_sa-Supplementary Material/parallel_configs/._IndivQLearningVar2.csv
- 3410_shield_decentralization_for_sa-Supplementary Material/parallel_configs/IndivQLearningSlugsTrain.csv
- __MACOSX/3410_shield_decentralization_for_sa-Supplementary Material/parallel_configs/._IndivQLearningSlugsTrain.csv
- 3410_shield_decentralization_for_sa-Supplementary Material/parallel_configs/IndivQLearningSlugs1kEval.csv
- __MACOSX/3410_shield_decentralization_for_sa-Supplementary Material/parallel_configs/._IndivQLearningSlugs1kEval.csv
- 3410_shield_decentralization_for_sa-Supplementary Material/parallel_configs/IndivQLearningParticleDNNOnlyOneHotTrain.csv
- __MACOSX/3410_shield_decentralization_for_sa-Supplementary Material/parallel_configs/._IndivQLearningParticleDNNOnlyOneHotTrain.csv
- 3410_shield_decentralization_for_sa-Supplementary Material/parallel_configs/IndivQLearningTabularAllButSUNY25Eval.csv
- __MACOSX/3410_shield_decentralization_for_sa-Supplementary Material/parallel_configs/._IndivQLearningTabularAllButSUNY25Eval.csv
- 3410_shield_decentralization_for_sa-Supplementary Material/parallel_configs/IndivQLearningParticleDNNOnlyOneHotEval.csv
- __MACOSX/3410_shield_decentralization_for_sa-Supplementary Material/parallel_configs/._IndivQLearningParticleDNNOnlyOneHotEval.csv
- 3410_shield_decentralization_for_sa-Supplementary Material/parallel_configs/1.csv
- __MACOSX/3410_shield_decentralization_for_sa-Supplementary Material/parallel_configs/._1.csv
- 3410_shield_decentralization_for_sa-Supplementary Material/parallel_configs/IndivQLearningReproTest.csv
- __MACOSX/3410_shield_decentralization_for_sa-Supplementary Material/parallel_configs/._IndivQLearningReproTest.csv
- 3410_shield_decentralization_for_sa-Supplementary Material/parallel_configs/ReplicateIngyFigure9-3.csv
- __MACOSX/3410_shield_decentralization_for_sa-Supplementary Material/parallel_configs/._ReplicateIngyFigure9-3.csv
- 3410_shield_decentralization_for_sa-Supplementary Material/parallel_configs/IndivQLearningTabularSweepRedoSUNYEval.csv
- __MACOSX/3410_shield_decentralization_for_sa-Supplementary Material/parallel_configs/._IndivQLearningTabularSweepRedoSUNYEval.csv
- 3410_shield_decentralization_for_sa-Supplementary Material/parallel_configs/ReplicateIngyFigure9-2.csv
- __MACOSX/3410_shield_decentralization_for_sa-Supplementary Material/parallel_configs/._ReplicateIngyFigure9-2.csv
- 3410_shield_decentralization_for_sa-Supplementary Material/parallel_configs/IndivQLearningTabularSweepRedoSUNYTrain.csv
- __MACOSX/3410_shield_decentralization_for_sa-Supplementary Material/parallel_configs/._IndivQLearningTabularSweepRedoSUNYTrain.csv
- 3410_shield_decentralization_for_sa-Supplementary Material/parallel_configs/IndivQLearningParticleDNNEval.csv
- __MACOSX/3410_shield_decentralization_for_sa-Supplementary Material/parallel_configs/._IndivQLearningParticleDNNEval.csv
- 3410_shield_decentralization_for_sa-Supplementary Material/parallel_configs/IndivQLearningVarOneEachSeed.csv
- __MACOSX/3410_shield_decentralization_for_sa-Supplementary Material/parallel_configs/._IndivQLearningVarOneEachSeed.csv
- 3410_shield_decentralization_for_sa-Supplementary Material/parallel_configs/IndivQLearningSlugsConsistentOrderEval.csv
- __MACOSX/3410_shield_decentralization_for_sa-Supplementary Material/parallel_configs/._IndivQLearningSlugsConsistentOrderEval.csv
- 3410_shield_decentralization_for_sa-Supplementary Material/parallel_configs/IndivQLearningTabularAllButSUNY25Train.csv
- __MACOSX/3410_shield_decentralization_for_sa-Supplementary Material/parallel_configs/._IndivQLearningTabularAllButSUNY25Train.csv
- 3410_shield_decentralization_for_sa-Supplementary Material/parallel_configs/IndivQLearningVarNearbyObs1.csv
- __MACOSX/3410_shield_decentralization_for_sa-Supplementary Material/parallel_configs/._IndivQLearningVarNearbyObs1.csv
- 3410_shield_decentralization_for_sa-Supplementary Material/parallel_configs/IndivQLearningVarOneEach.csv
- __MACOSX/3410_shield_decentralization_for_sa-Supplementary Material/parallel_configs/._IndivQLearningVarOneEach.csv
- 3410_shield_decentralization_for_sa-Supplementary Material/parallel_configs/IndivQLearningParticleDNNOnlyOneHotMoreSeedsTrain.csv
- __MACOSX/3410_shield_decentralization_for_sa-Supplementary Material/parallel_configs/._IndivQLearningParticleDNNOnlyOneHotMoreSeedsTrain.csv
- 3410_shield_decentralization_for_sa-Supplementary Material/parallel_configs/IndivQLearningSlugsEval.csv
- __MACOSX/3410_shield_decentralization_for_sa-Supplementary Material/parallel_configs/._IndivQLearningSlugsEval.csv
- 3410_shield_decentralization_for_sa-Supplementary Material/parallel_configs/ContinuousGridworldEval.csv
- __MACOSX/3410_shield_decentralization_for_sa-Supplementary Material/parallel_configs/._ContinuousGridworldEval.csv
- 3410_shield_decentralization_for_sa-Supplementary Material/parallel_configs/InitialDNN.csv
- __MACOSX/3410_shield_decentralization_for_sa-Supplementary Material/parallel_configs/._InitialDNN.csv
- 3410_shield_decentralization_for_sa-Supplementary Material/parallel_configs/IndivQLearningSlugsTerminateOnCollisionTrain.csv
- __MACOSX/3410_shield_decentralization_for_sa-Supplementary Material/parallel_configs/._IndivQLearningSlugsTerminateOnCollisionTrain.csv
- 3410_shield_decentralization_for_sa-Supplementary Material/parallel_configs/InitialDNNSmall.csv
- __MACOSX/3410_shield_decentralization_for_sa-Supplementary Material/parallel_configs/._InitialDNNSmall.csv
- 3410_shield_decentralization_for_sa-Supplementary Material/parallel_configs/IndivQLearningParticleDNNOnlyOneHotMoreSeeds2Train.csv
- __MACOSX/3410_shield_decentralization_for_sa-Supplementary Material/parallel_configs/._IndivQLearningParticleDNNOnlyOneHotMoreSeeds2Train.csv
- 3410_shield_decentralization_for_sa-Supplementary Material/parallel_configs/IndivQLearningTabularSweepMillionStepsEval.csv
- __MACOSX/3410_shield_decentralization_for_sa-Supplementary Material/parallel_configs/._IndivQLearningTabularSweepMillionStepsEval.csv
- 3410_shield_decentralization_for_sa-Supplementary Material/parallel_configs/IndivQLearningTabularSweepTrain.csv
- __MACOSX/3410_shield_decentralization_for_sa-Supplementary Material/parallel_configs/._IndivQLearningTabularSweepTrain.csv
- 3410_shield_decentralization_for_sa-Supplementary Material/parallel_configs/IndivQLearningTabularSweepEval.csv
- __MACOSX/3410_shield_decentralization_for_sa-Supplementary Material/parallel_configs/._IndivQLearningTabularSweepEval.csv
- 3410_shield_decentralization_for_sa-Supplementary Material/parallel_configs/ReplicateIngyFigure9.csv
- __MACOSX/3410_shield_decentralization_for_sa-Supplementary Material/parallel_configs/._ReplicateIngyFigure9.csv
- 3410_shield_decentralization_for_sa-Supplementary Material/parallel_configs/debug1.csv
- __MACOSX/3410_shield_decentralization_for_sa-Supplementary Material/parallel_configs/._debug1.csv
- 3410_shield_decentralization_for_sa-Supplementary Material/parallel_configs/IndivQLearningParticleDNNOnlyOneHotMoreSeedsEval.csv
- __MACOSX/3410_shield_decentralization_for_sa-Supplementary Material/parallel_configs/._IndivQLearningParticleDNNOnlyOneHotMoreSeedsEval.csv
- 3410_shield_decentralization_for_sa-Supplementary Material/parallel_configs/IndivQLearningVar.csv
- __MACOSX/3410_shield_decentralization_for_sa-Supplementary Material/parallel_configs/._IndivQLearningVar.csv
- 3410_shield_decentralization_for_sa-Supplementary Material/parallel_configs/IndivQLearningParticleTrain.csv
- __MACOSX/3410_shield_decentralization_for_sa-Supplementary Material/parallel_configs/._IndivQLearningParticleTrain.csv
- 3410_shield_decentralization_for_sa-Supplementary Material/parallel_configs/IndivQLearningTabularSweepMillionStepsTrain.csv
- __MACOSX/3410_shield_decentralization_for_sa-Supplementary Material/parallel_configs/._IndivQLearningTabularSweepMillionStepsTrain.csv
- 3410_shield_decentralization_for_sa-Supplementary Material/parallel_configs/ContinuousGridworldTrain.csv
- __MACOSX/3410_shield_decentralization_for_sa-Supplementary Material/parallel_configs/._ContinuousGridworldTrain.csv
- 3410_shield_decentralization_for_sa-Supplementary Material/parallel_configs/IndivQLearningParticleDNNTrain.csv
- __MACOSX/3410_shield_decentralization_for_sa-Supplementary Material/parallel_configs/._IndivQLearningParticleDNNTrain.csv
- 3410_shield_decentralization_for_sa-Supplementary Material/parallel_configs/IndivQLearningParticleEval.csv
- __MACOSX/3410_shield_decentralization_for_sa-Supplementary Material/parallel_configs/._IndivQLearningParticleEval.csv
- 3410_shield_decentralization_for_sa-Supplementary Material/parallel_configs/IndivQLearningSlugsTerminateOnCollisionEval.csv
- __MACOSX/3410_shield_decentralization_for_sa-Supplementary Material/parallel_configs/._IndivQLearningSlugsTerminateOnCollisionEval.csv
- 3410_shield_decentralization_for_sa-Supplementary Material/parallel_configs/IndivQLearningParticleDNNOnlyOneHotMoreSeeds2Eval.csv
- __MACOSX/3410_shield_decentralization_for_sa-Supplementary Material/parallel_configs/._IndivQLearningParticleDNNOnlyOneHotMoreSeeds2Eval.csv
- 3410_shield_decentralization_for_sa-Supplementary Material/parallel_configs/IndivQLearningSlugs1kTrain.csv
- __MACOSX/3410_shield_decentralization_for_sa-Supplementary Material/parallel_configs/._IndivQLearningSlugs1kTrain.csv
- 3410_shield_decentralization_for_sa-Supplementary Material/centralized_verification/configuration.py
- __MACOSX/3410_shield_decentralization_for_sa-Supplementary Material/centralized_verification/._configuration.py
- 3410_shield_decentralization_for_sa-Supplementary Material/centralized_verification/paths.py
- __MACOSX/3410_shield_decentralization_for_sa-Supplementary Material/centralized_verification/._paths.py
- 3410_shield_decentralization_for_sa-Supplementary Material/centralized_verification/shields/
- __MACOSX/3410_shield_decentralization_for_sa-Supplementary Material/centralized_verification/._shields
- 3410_shield_decentralization_for_sa-Supplementary Material/centralized_verification/__init__.py
- 3410_shield_decentralization_for_sa-Supplementary Material/centralized_verification/agents/
- __MACOSX/3410_shield_decentralization_for_sa-Supplementary Material/centralized_verification/._agents
- 3410_shield_decentralization_for_sa-Supplementary Material/centralized_verification/models/
- __MACOSX/3410_shield_decentralization_for_sa-Supplementary Material/centralized_verification/._models
- 3410_shield_decentralization_for_sa-Supplementary Material/centralized_verification/utils.py
- __MACOSX/3410_shield_decentralization_for_sa-Supplementary Material/centralized_verification/._utils.py
- 3410_shield_decentralization_for_sa-Supplementary Material/centralized_verification/MultiAgentAPEnv.py
- __MACOSX/3410_shield_decentralization_for_sa-Supplementary Material/centralized_verification/._MultiAgentAPEnv.py
- 3410_shield_decentralization_for_sa-Supplementary Material/centralized_verification/train.py
- __MACOSX/3410_shield_decentralization_for_sa-Supplementary Material/centralized_verification/._train.py
- 3410_shield_decentralization_for_sa-Supplementary Material/centralized_verification/rolling_stat_tracker.py
- __MACOSX/3410_shield_decentralization_for_sa-Supplementary Material/centralized_verification/._rolling_stat_tracker.py
- 3410_shield_decentralization_for_sa-Supplementary Material/centralized_verification/training_state.py
- __MACOSX/3410_shield_decentralization_for_sa-Supplementary Material/centralized_verification/._training_state.py
- 3410_shield_decentralization_for_sa-Supplementary Material/centralized_verification/envs/
- __MACOSX/3410_shield_decentralization_for_sa-Supplementary Material/centralized_verification/._envs
- 3410_shield_decentralization_for_sa-Supplementary Material/experiments/parallel/q_learning_1.py
- __MACOSX/3410_shield_decentralization_for_sa-Supplementary Material/experiments/parallel/._q_learning_1.py
- 3410_shield_decentralization_for_sa-Supplementary Material/experiments/parallel/__init__.py
- 3410_shield_decentralization_for_sa-Supplementary Material/experiments/analysis/create_training_curves.py
- __MACOSX/3410_shield_decentralization_for_sa-Supplementary Material/experiments/analysis/._create_training_curves.py
- 3410_shield_decentralization_for_sa-Supplementary Material/experiments/analysis/__init__.py
- 3410_shield_decentralization_for_sa-Supplementary Material/experiments/analysis/create_experiment_table.py
- __MACOSX/3410_shield_decentralization_for_sa-Supplementary Material/experiments/analysis/._create_experiment_table.py
- 3410_shield_decentralization_for_sa-Supplementary Material/experiments/analysis/average_num_actions.py
- __MACOSX/3410_shield_decentralization_for_sa-Supplementary Material/experiments/analysis/._average_num_actions.py
- 3410_shield_decentralization_for_sa-Supplementary Material/experiments/analysis/create_map_images.py
- __MACOSX/3410_shield_decentralization_for_sa-Supplementary Material/experiments/analysis/._create_map_images.py
- 3410_shield_decentralization_for_sa-Supplementary Material/experiments/utils/parallel_run.py
- __MACOSX/3410_shield_decentralization_for_sa-Supplementary Material/experiments/utils/._parallel_run.py
- 3410_shield_decentralization_for_sa-Supplementary Material/experiments/utils/__init__.py
- 3410_shield_decentralization_for_sa-Supplementary Material/experiments/utils/basic_pentagon_config.py
- __MACOSX/3410_shield_decentralization_for_sa-Supplementary Material/experiments/utils/._basic_pentagon_config.py
- 3410_shield_decentralization_for_sa-Supplementary Material/experiments/utils/parallel_experiment.py
- __MACOSX/3410_shield_decentralization_for_sa-Supplementary Material/experiments/utils/._parallel_experiment.py
- 3410_shield_decentralization_for_sa-Supplementary Material/experiments/config_gen/make_q_config_initial_dnn.py
- __MACOSX/3410_shield_decentralization_for_sa-Supplementary Material/experiments/config_gen/._make_q_config_initial_dnn.py
- 3410_shield_decentralization_for_sa-Supplementary Material/experiments/config_gen/make_q_config_momentum_dnn_more_seeds.py
- __MACOSX/3410_shield_decentralization_for_sa-Supplementary Material/experiments/config_gen/._make_q_config_momentum_dnn_more_seeds.py
- 3410_shield_decentralization_for_sa-Supplementary Material/experiments/config_gen/make_q_config_tabular_sweep.py
- __MACOSX/3410_shield_decentralization_for_sa-Supplementary Material/experiments/config_gen/._make_q_config_tabular_sweep.py
- 3410_shield_decentralization_for_sa-Supplementary Material/experiments/config_gen/make_q_config_momentum_dnn.py
- __MACOSX/3410_shield_decentralization_for_sa-Supplementary Material/experiments/config_gen/._make_q_config_momentum_dnn.py
- 3410_shield_decentralization_for_sa-Supplementary Material/experiments/config_gen/make_q_config_momentum.py
- __MACOSX/3410_shield_decentralization_for_sa-Supplementary Material/experiments/config_gen/._make_q_config_momentum.py
- 3410_shield_decentralization_for_sa-Supplementary Material/experiments/config_gen/__init__.py
- 3410_shield_decentralization_for_sa-Supplementary Material/experiments/config_gen/make_q_config_slugs_consistent_order.py
- __MACOSX/3410_shield_decentralization_for_sa-Supplementary Material/experiments/config_gen/._make_q_config_slugs_consistent_order.py
- 3410_shield_decentralization_for_sa-Supplementary Material/experiments/config_gen/make_q_config_replicate_ingy_fig9.py
- __MACOSX/3410_shield_decentralization_for_sa-Supplementary Material/experiments/config_gen/._make_q_config_replicate_ingy_fig9.py
- 3410_shield_decentralization_for_sa-Supplementary Material/experiments/config_gen/make_q_config_slugs_term_on_collision.py
- __MACOSX/3410_shield_decentralization_for_sa-Supplementary Material/experiments/config_gen/._make_q_config_slugs_term_on_collision.py
- 3410_shield_decentralization_for_sa-Supplementary Material/experiments/config_gen/make_q_config_slugs_1k_episodes.py
- __MACOSX/3410_shield_decentralization_for_sa-Supplementary Material/experiments/config_gen/._make_q_config_slugs_1k_episodes.py
- 3410_shield_decentralization_for_sa-Supplementary Material/experiments/config_gen/make_q_config_continuous_gridworld.py
- __MACOSX/3410_shield_decentralization_for_sa-Supplementary Material/experiments/config_gen/._make_q_config_continuous_gridworld.py
- 3410_shield_decentralization_for_sa-Supplementary Material/experiments/config_gen/make_q_config.py
- __MACOSX/3410_shield_decentralization_for_sa-Supplementary Material/experiments/config_gen/._make_q_config.py
- 3410_shield_decentralization_for_sa-Supplementary Material/experiments/config_gen/make_q_config_slugs.py
- __MACOSX/3410_shield_decentralization_for_sa-Supplementary Material/experiments/config_gen/._make_q_config_slugs.py
- 3410_shield_decentralization_for_sa-Supplementary Material/lib/from_ingy/gen_shield_grid.py
- __MACOSX/3410_shield_decentralization_for_sa-Supplementary Material/lib/from_ingy/._gen_shield_grid.py
- 3410_shield_decentralization_for_sa-Supplementary Material/lib/from_ingy/gridworld.py
- __MACOSX/3410_shield_decentralization_for_sa-Supplementary Material/lib/from_ingy/._gridworld.py
- 3410_shield_decentralization_for_sa-Supplementary Material/lib/from_ingy/Control_Parser.py
- __MACOSX/3410_shield_decentralization_for_sa-Supplementary Material/lib/from_ingy/._Control_Parser.py
- 3410_shield_decentralization_for_sa-Supplementary Material/lib/from_ingy/grid_preprocessing.py
- __MACOSX/3410_shield_decentralization_for_sa-Supplementary Material/lib/from_ingy/._grid_preprocessing.py
- 3410_shield_decentralization_for_sa-Supplementary Material/lib/from_ingy/compile_all_grid.sh
- __MACOSX/3410_shield_decentralization_for_sa-Supplementary Material/lib/from_ingy/._compile_all_grid.sh
- 3410_shield_decentralization_for_sa-Supplementary Material/lib/from_ingy/ISR_2_agents_2.structuredslugs
- __MACOSX/3410_shield_decentralization_for_sa-Supplementary Material/lib/from_ingy/._ISR_2_agents_2.structuredslugs
- 3410_shield_decentralization_for_sa-Supplementary Material/centralized_verification/shields/decentralized_shield.py
- __MACOSX/3410_shield_decentralization_for_sa-Supplementary Material/centralized_verification/shields/._decentralized_shield.py
- 3410_shield_decentralization_for_sa-Supplementary Material/centralized_verification/shields/ahead_of_time_shield.py
- __MACOSX/3410_shield_decentralization_for_sa-Supplementary Material/centralized_verification/shields/._ahead_of_time_shield.py
- 3410_shield_decentralization_for_sa-Supplementary Material/centralized_verification/shields/slugs_shielding/
- __MACOSX/3410_shield_decentralization_for_sa-Supplementary Material/centralized_verification/shields/._slugs_shielding
- 3410_shield_decentralization_for_sa-Supplementary Material/centralized_verification/shields/shield.py
- __MACOSX/3410_shield_decentralization_for_sa-Supplementary Material/centralized_verification/shields/._shield.py
- 3410_shield_decentralization_for_sa-Supplementary Material/centralized_verification/shields/centralized_shield.py
- __MACOSX/3410_shield_decentralization_for_sa-Supplementary Material/centralized_verification/shields/._centralized_shield.py
- 3410_shield_decentralization_for_sa-Supplementary Material/centralized_verification/shields/__init__.py
- 3410_shield_decentralization_for_sa-Supplementary Material/centralized_verification/shields/utils.py
- __MACOSX/3410_shield_decentralization_for_sa-Supplementary Material/centralized_verification/shields/._utils.py
- 3410_shield_decentralization_for_sa-Supplementary Material/centralized_verification/shields/no_shield.py
- __MACOSX/3410_shield_decentralization_for_sa-Supplementary Material/centralized_verification/shields/._no_shield.py
- 3410_shield_decentralization_for_sa-Supplementary Material/centralized_verification/agents/centralized_training/
- __MACOSX/3410_shield_decentralization_for_sa-Supplementary Material/centralized_verification/agents/._centralized_training
- 3410_shield_decentralization_for_sa-Supplementary Material/centralized_verification/agents/multi_agent.py
- __MACOSX/3410_shield_decentralization_for_sa-Supplementary Material/centralized_verification/agents/._multi_agent.py
- 3410_shield_decentralization_for_sa-Supplementary Material/centralized_verification/agents/__init__.py
- 3410_shield_decentralization_for_sa-Supplementary Material/centralized_verification/agents/utils.py
- __MACOSX/3410_shield_decentralization_for_sa-Supplementary Material/centralized_verification/agents/._utils.py
- 3410_shield_decentralization_for_sa-Supplementary Material/centralized_verification/agents/decentralized_training/
- __MACOSX/3410_shield_decentralization_for_sa-Supplementary Material/centralized_verification/agents/._decentralized_training
- 3410_shield_decentralization_for_sa-Supplementary Material/centralized_verification/agents/single_agent.py
- __MACOSX/3410_shield_decentralization_for_sa-Supplementary Material/centralized_verification/agents/._single_agent.py
- 3410_shield_decentralization_for_sa-Supplementary Material/centralized_verification/models/simple_cnn.py
- __MACOSX/3410_shield_decentralization_for_sa-Supplementary Material/centralized_verification/models/._simple_cnn.py
- 3410_shield_decentralization_for_sa-Supplementary Material/centralized_verification/models/__init__.py
- 3410_shield_decentralization_for_sa-Supplementary Material/centralized_verification/models/simple_mlp.py
- __MACOSX/3410_shield_decentralization_for_sa-Supplementary Material/centralized_verification/models/._simple_mlp.py
- 3410_shield_decentralization_for_sa-Supplementary Material/centralized_verification/models/norm_simple_mlp.py
- __MACOSX/3410_shield_decentralization_for_sa-Supplementary Material/centralized_verification/models/._norm_simple_mlp.py
- 3410_shield_decentralization_for_sa-Supplementary Material/centralized_verification/models/rollout_buffer.py
- __MACOSX/3410_shield_decentralization_for_sa-Supplementary Material/centralized_verification/models/._rollout_buffer.py
- 3410_shield_decentralization_for_sa-Supplementary Material/centralized_verification/envs/unused/
- __MACOSX/3410_shield_decentralization_for_sa-Supplementary Material/centralized_verification/envs/._unused
- 3410_shield_decentralization_for_sa-Supplementary Material/centralized_verification/envs/__init__.py
- 3410_shield_decentralization_for_sa-Supplementary Material/centralized_verification/envs/continuous_grid_world.py
- __MACOSX/3410_shield_decentralization_for_sa-Supplementary Material/centralized_verification/envs/._continuous_grid_world.py
- 3410_shield_decentralization_for_sa-Supplementary Material/centralized_verification/envs/utils.py
- __MACOSX/3410_shield_decentralization_for_sa-Supplementary Material/centralized_verification/envs/._utils.py
- 3410_shield_decentralization_for_sa-Supplementary Material/centralized_verification/envs/fast_grid_world_nearby_obs.py
- __MACOSX/3410_shield_decentralization_for_sa-Supplementary Material/centralized_verification/envs/._fast_grid_world_nearby_obs.py
- 3410_shield_decentralization_for_sa-Supplementary Material/centralized_verification/envs/fast_grid_world.py
- __MACOSX/3410_shield_decentralization_for_sa-Supplementary Material/centralized_verification/envs/._fast_grid_world.py
- 3410_shield_decentralization_for_sa-Supplementary Material/centralized_verification/envs/fast_grid_world_partial_obs.py
- __MACOSX/3410_shield_decentralization_for_sa-Supplementary Material/centralized_verification/envs/._fast_grid_world_partial_obs.py
- 3410_shield_decentralization_for_sa-Supplementary Material/centralized_verification/envs/fast_grid_world_2d_obs.py
- __MACOSX/3410_shield_decentralization_for_sa-Supplementary Material/centralized_verification/envs/._fast_grid_world_2d_obs.py
- 3410_shield_decentralization_for_sa-Supplementary Material/centralized_verification/envs/particle_momentum.py
- __MACOSX/3410_shield_decentralization_for_sa-Supplementary Material/centralized_verification/envs/._particle_momentum.py
- 3410_shield_decentralization_for_sa-Supplementary Material/centralized_verification/shields/slugs_shielding/slugs_decentralized_shield.py
- __MACOSX/3410_shield_decentralization_for_sa-Supplementary Material/centralized_verification/shields/slugs_shielding/._slugs_decentralized_shield.py
- 3410_shield_decentralization_for_sa-Supplementary Material/centralized_verification/shields/slugs_shielding/__init__.py
- 3410_shield_decentralization_for_sa-Supplementary Material/centralized_verification/shields/slugs_shielding/slugs_centralized_shield.py
- __MACOSX/3410_shield_decentralization_for_sa-Supplementary Material/centralized_verification/shields/slugs_shielding/._slugs_centralized_shield.py
- 3410_shield_decentralization_for_sa-Supplementary Material/centralized_verification/shields/slugs_shielding/combine_identical_states.py
- __MACOSX/3410_shield_decentralization_for_sa-Supplementary Material/centralized_verification/shields/slugs_shielding/._combine_identical_states.py
- 3410_shield_decentralization_for_sa-Supplementary Material/centralized_verification/shields/slugs_shielding/label_extractor.py
- __MACOSX/3410_shield_decentralization_for_sa-Supplementary Material/centralized_verification/shields/slugs_shielding/._label_extractor.py
- 3410_shield_decentralization_for_sa-Supplementary Material/centralized_verification/agents/centralized_training/__init__.py
[truncated: 19 more entries]
