# Supplementary material
Source: ML conference proceedings conference paper supplement (https://proceedings.neurips.cc/paper_files/paper/2022/hash/57444e14ecd9e2c8f603b4f012ce3811-Abstract.html)
Supplement: Supplementary file 1 [file 57444e14ecd9e2c8f603b4f012ce3811-Supplemental-Conference.zip › 3410_shield_decentralization_for_sa-Supplementary Material/centralized_verification/agents/decentralized_training/independent_agents/deep_q_learner.py]

import gym.spaces
import numpy as np
import torch
import torch.nn as nn
import torch.nn.functional as F
from torch.optim import Adam

from centralized_verification.agents.decentralized_training.independent_agents.q_learner import QLearner
from centralized_verification.models.rollout_buffer import CircularRolloutBuffer, TraceStep
from centralized_verification.utils import Updater
from experiments.utils.parallel_run import DEVICE

BATCH_SIZE = 32


class DeepQLearner(QLearner):
    def __init__(self, *args, model_class, make_multidiscrete_one_hot: bool = False, train_every_steps=4, **kwargs):
        super().__init__(*args, **kwargs)
        if isinstance(self.obs_space, gym.spaces.Box):
            self.obs_shape = self.obs_space.shape
            self.obs_dtype = self.obs_space.dtype
        elif isinstance(self.obs_space, gym.spaces.MultiDiscrete):
            if make_multidiscrete_one_hot:
                num_values = sum(self.obs_space.nvec)
            else:
                num_values = len(self.obs_space.nvec)
            self.obs_shape = (num_values,)
            self.obs_dtype = float
        else:
            raise Exception("Deep Q learner must have a box or multidiscrete observation space")

        self.make_multidiscrete_one_hot = make_multidiscrete_one_hot

        self.model: nn.Module = model_class(self.obs_shape, self.num_actions).to(DEVICE)
        self.target_model: nn.Module = model_class(self.obs_shape, self.num_actions).to(DEVICE)

        self.replay_buffer = CircularRolloutBuffer(capacity=int(1e5), input_shape=self.obs_shape,
                                                   state_dtype=torch.int8, device=DEVICE)
        self.trainer = Updater(lambda: self.perform_training())
        self.target_agent_updater = Updater(lambda: self.target_model.load_state_dict(self.model.state_dict()))
        self.optimizer = Adam(self.model.parameters())
        self.last_training_loss = None
        self.train_every_steps = train_every_steps

    def transform_obs(self, obs):
        if isinstance(self.obs_space, gym.spaces.MultiDiscrete):
            if self.make_multidiscrete_one_hot:
                arr = np.zeros(sum(self.obs_space.nvec))
                skip = 0
                for val, max_val in zip(obs, self.obs_space.nvec):
                    arr[skip + val] = 1
                    skip += max_val
                return arr
            else:
                return np.asarray(obs)
        else:
            return obs

    def get_greedy_action(self, observation):
        model_input_batched = torch.as_tensor(observation, device=DEVICE).view((1, *self.obs_shape)).float()
        model_output = self.model(model_input_batched).view((self.num_actions,))
        return int(model_output.argmax())

    def update_q(self, obs, action, next_obs, rew, done, step_num, training_progress):
        self.optimizer.zero_grad()
        self.replay_buffer.add_step(TraceStep(state=torch.as_tensor(obs, device=DEVICE), action=action, reward=rew,
                                              next_state=torch.as_tensor(next_obs, device=DEVICE), done=done))

        if self.replay_buffer.num_filled_approx() >= BATCH_SIZE * 10:
            self.trainer.update_every(self.train_every_steps)
            self.target_agent_updater.update_every(200)

    def perform_training(self):
        self.optimizer.zero_grad()
        rollout_sample, indices, importance = self.replay_buffer.sample(BATCH_SIZE, priority_scale=0.7)

        importance = torch.pow(importance, 0.9)  # So that high-priority states aren't _too_ overrepresented

        # Estimate best action in new states using main Q network
        q_max = self.model(rollout_sample.next_states)
        arg_q_max = torch.argmax(q_max, dim=1)

        # Target DQN estimates q-values
        future_q_values = self.target_model(rollout_sample.next_states)
        double_q = future_q_values[range(BATCH_SIZE), arg_q_max]

        # Calculate targets (bellman equation)
        target_q = rollout_sample.rewards + (self.discount * double_q * (~rollout_sample.dones).float())
        target_q = target_q.detach()

        # What are the q-values that the current agent predicts for the actions it took
        q_values = self.model(rollout_sample.states)
        action_q_values = q_values[range(BATCH_SIZE), rollout_sample.actions]

        # Sample q values that we get wrong more often
        error = action_q_values - target_q
        self.replay_buffer.set_priorities(indices=indices, errors=error.detach())

        # Actually train the neural network
        loss = F.mse_loss(input=action_q_values, target=target_q, reduction='none')
        loss = (loss * importance).mean()
        loss.backward()

        self.last_training_loss = float(loss)
        self.optimizer.step()

    def state_dict(self):
        return {
            "optimizer": self.optimizer.state_dict(),
            "model": self.model.state_dict(),
            "target_model": self.target_model.state_dict(),
            "last_training_loss": self.last_training_loss,
            "replay_buffer": self.replay_buffer.state_dict()
        }

    def load_state_dict(self, state_dict):
        self.optimizer.load_state_dict(state_dict["optimizer"])
        self.model.load_state_dict(state_dict["model"])
        self.target_model.load_state_dict(state_dict["target_model"])
        self.last_training_loss = state_dict.get("last_training_loss")
        self.replay_buffer.load_state_dict(state_dict["replay_buffer"])

    def get_log_dict(self):
        ld = super().get_log_dict()
        ld.update({
            "training_loss": self.last_training_loss
        })
        return ld
