# Supplementary material
Source: ML conference proceedings conference paper supplement (https://proceedings.neurips.cc/paper_files/paper/2022/hash/57444e14ecd9e2c8f603b4f012ce3811-Abstract.html)
Supplement: Supplementary file 1 [file 57444e14ecd9e2c8f603b4f012ce3811-Supplemental-Conference.zip › 3410_shield_decentralization_for_sa-Supplementary Material/centralized_verification/envs/fast_grid_world_partial_obs.py]

from typing import Sequence

import gym.spaces as spaces

from centralized_verification.envs.fast_grid_world import FastGridWorld


class FastGridWorldPartialObs(FastGridWorld):
    def agent_obs_spaces(self) -> Sequence[spaces.Space]:
        return [spaces.Discrete(len(self.grid_posns))] * self.num_agents

    def project_obs(self, state) -> Sequence[int]:
        return state  # Using the fact that a state is really just the position of each agent in a list
