# Supplementary material
Source: ML conference proceedings conference paper supplement (https://proceedings.neurips.cc/paper_files/paper/2022/hash/57444e14ecd9e2c8f603b4f012ce3811-Abstract.html)
Supplement: Supplementary file 1 [file 57444e14ecd9e2c8f603b4f012ce3811-Supplemental-Conference.zip › 3410_shield_decentralization_for_sa-Supplementary Material/centralized_verification/paths.py]

import socket

RUNNING_ON_DISCOVERY = ("discovery" in socket.getfqdn(socket.gethostname()))

if RUNNING_ON_DISCOVERY:
    CHECKPOINT_DIR = "/scratch/melcer.d/centralized_verification/checkpoints"
    WANDB_DIR = "/scratch/melcer.d/centralized_verification/wandb"
else:
    CHECKPOINT_DIR = "checkpoints"
    WANDB_DIR = "."
