# Supplementary material
Source: ML conference proceedings conference paper supplement (https://proceedings.neurips.cc/paper_files/paper/2022/hash/57444e14ecd9e2c8f603b4f012ce3811-Abstract.html)
Supplement: Supplementary file 1 [file 57444e14ecd9e2c8f603b4f012ce3811-Supplemental-Conference.zip › 3410_shield_decentralization_for_sa-Supplementary Material/create_zip.sh]

zip submission.zip .gitmodules README *.sh requirements.txt centralized_verification/*/*.py \
centralized_verification/*/*/*.py centralized_verification/*/*/*/*.py \
centralized_verification/*.py experiments/*.py experiments/**/*.py lib/from_ingy/*  \
maps/* parallel_configs/*.csv shields/*.structuredslugs
