# Supplementary material
Source: ML conference proceedings conference paper supplement (https://proceedings.neurips.cc/paper_files/paper/2022/hash/57444e14ecd9e2c8f603b4f012ce3811-Abstract.html)
Supplement: Supplementary file 1 [file 57444e14ecd9e2c8f603b4f012ce3811-Supplemental-Conference.zip › 3410_shield_decentralization_for_sa-Supplementary Material/generate_shield.sh]

#!/bin/bash -l

conda run -n CentralizedVerification python lib/slugs/tools/StructuredSlugsParser/compiler.py "$1".structuredslugs > "$1".slugsin
lib/slugs/src/slugs --explicitStrategy --jsonOutput "$1".slugsin > "$1".json

conda run -n CentralizedVerificationPython2 python lib/from_ingy/Control_Parser.py "$1"

conda run -n CentralizedVerification python centralized_verification/shields/slugs_shielding/combine_identical_states.py "$1"
