# Supplementary material
Source: ML conference proceedings conference paper supplement (https://proceedings.neurips.cc/paper_files/paper/2022/hash/57444e14ecd9e2c8f603b4f012ce3811-Abstract.html)
Supplement: Supplementary file 1 [file 57444e14ecd9e2c8f603b4f012ce3811-Supplemental-Conference.zip › 3410_shield_decentralization_for_sa-Supplementary Material/lib/from_ingy/gen_shield_grid.py]

import sys
from enum import Enum

import numpy as np

from grid_preprocessing import preprocessing


class Action(Enum):
    stay = 0
    up = 1
    down = 2
    left = 3
    right = 4

    def all_actions(self):
        return [self.stay, self.up, self.down, self.left, self.right]


class GridWorld:
    def __init__(self, map, name, n):

        self.collision = True
        self.distance = False
        self.coop = False
        self.shared_goal = False
        self.nagents = int(n)
        self.res = [3, 3]  # width, length / columns, rows

        self.states = np.zeros(self.res)
        self.state_to_pos = np.zeros(np.concatenate((self.res, 2), axis=None))
        for i in range(self.res[1]):
            for map_j in range(self.res[0]):
                self.states[i][map_j] = i * self.res[1] + map_j
                self.state_to_pos[i][map_j] = [i, map_j]

        # print(self.state_to_pos)
        self.nactions = 5
        self.obstacle = False

        self.process_map(map)

        # read map
        with open('maps/' + map + ".txt") as textFile:
            self.map = [line.split() for line in textFile]
        self.map = [[int(e) for e in row] for row in self.map]

        # grid preprocessing
        self.map, self.smap, self.coord = preprocessing(self.map, self.res)

        self.nshields = int(np.max(self.smap))
        print("Number of Shields: ", self.nshields, '\n')
        self.shield_max = [2] * int(self.nshields)  # tODO -> make it based on shield morphology

        file = open('grid_shields/' + map + '/shield_num.txt', 'w')
        file.write(str(self.nshields))
        file.close()

        self.map = np.asarray(self.map)
        self.nstates = np.count_nonzero(self.map == 0)
        print(self.map)
        print(self.smap)
        print('Initialization complete')
        print('Number of reachable states : ', self.nstates)
        # print(self.coord)
        # e_s = self.find_entries(4)
        # print(self.get_next(1, 4, e_s))

        if "fair" in name:
            self.fair = True
            print("****** Fair option selected ******")
        else:
            self.fair = False

    def get_state(self, x, y):
        return x * self.ncols + y

    def is_target(self, n, x, y):

        if self.targets[n][0] == x and self.targets[n][1] == y:
            return True
        return False

    def get_next(self, state, shield_num, entry_states):
        valid = set()
        obs = set()
        corner = self.coord[shield_num]
        move = [[0, -1], [1, 0], [0, 1], [-1, 0]]  # left/down/right/up
        disp = self.state_to_pos[int(state / self.res[1])][int(state % self.res[0])]
        # print(state, disp)
        pos = [int(corner[0] + disp[0]), int(corner[1] + disp[1])]
        # print(pos)
        if self.smap[corner[0]][corner[1]] != self.smap[pos[0]][pos[1]]:
            print("Error: invalid shield and position combination")
        else:
            # print("valid combination ")
            state = self.states[pos[0] - corner[0]][pos[1] - corner[1]]
            valid.add(state)

            for i in range(len(move)):

                map_i = np.clip(pos[0] + move[i][0], 0, self.map.shape[0] - 1)
                map_j = np.clip(pos[1] + move[i][1], 0, self.map.shape[1] - 1)

                # print(map_i, map_j)
                # print(self.map[map_i][map_j])
                if self.smap[map_i][map_j] != shield_num + 1 and state in entry_states:
                    valid.add(9)  # outside shield shield_num

                elif self.smap[map_i][map_j] != shield_num + 1:  # outside but not a valid exiting state
                    pass

                elif self.map[map_i][map_j]:  # obstacle
                    obs.add(int(self.states[map_i - corner[0]][map_j - corner[1]]))

                elif not self.map[map_i][map_j]:
                    valid.add(int(self.states[map_i - corner[0]][map_j - corner[1]]))

        return valid, obs

    def get_next_req(self, state, shield_num, entry_states, debug=False):
        valid = set()
        corner = self.coord[shield_num]
        move = [[0, -1], [1, 0], [0, 1], [-1, 0]]  # left/down/right/up
        # print(state, shield_num, entry_states)
        disp = self.state_to_pos[int(state / self.res[1])][int(state % self.res[0])]
        pos = [int(corner[0] + disp[0]), int(corner[1] + disp[1])]

        valid.add(state)

        for i in range(len(move)):

            map_i = np.clip(pos[0] + move[i][0], 0, self.map.shape[0] - 1)
            map_j = np.clip(pos[1] + move[i][1], 0, self.map.shape[1] - 1)

            if self.smap[map_i][map_j] != shield_num + 1 and state in entry_states:
                valid.add(9)  # outside shield shield_num

            elif self.smap[map_i][map_j] != shield_num + 1:  # outside but not a valid exiting state
                pass

            else:
                valid.add(int(self.states[map_i - corner[0]][map_j - corner[1]]))

        return valid

    def find_entries(self, shield_num, req=False):
        corner = self.coord[shield_num]
        entry_states = set()

        # check top
        if corner[0] > 0:  # TODO make it so if there is a block outside shield -> still counts for a_req.
            for i in range(self.res[0]):
                if (req or not self.map[corner[0] - 1][corner[1] + i]) and (
                        req or not self.map[corner[0]][corner[1] + i]):
                    entry_states.add(i)

        # check bottom
        if corner[0] + self.res[1] < self.map.shape[0]:
            for i in range(self.res[0]):
                if (req or not self.map[corner[0] + self.res[1]][corner[1] + i]) and (
                        req or not self.map[corner[0] + self.res[1] - 1][corner[1] + i]):
                    entry_states.add(i + 6)

        # check right
        r = [2, 5, 8]
        if corner[1] + self.res[0] < self.map.shape[1]:
            for i in range(self.res[1]):
                if (req or not self.map[corner[0] + i][corner[1] + self.res[0]]) and (
                        req or not self.map[corner[0] + i][corner[1] + self.res[0] - 1]):
                    entry_states.add(r[i])
        # check left
        l = [0, 3, 6]
        if corner[1] > 0:
            for i in range(self.res[1]):
                if (req or not self.map[corner[0] + i][corner[1] - 1]) and (
                        req or not self.map[corner[0] + i][corner[1]]):
                    entry_states.add(l[i])

        return entry_states

    def find_obstacles(self, shield_num):
        corner = self.coord[shield_num]
        obs_states = set()

        for i in range(0, self.res[1]):
            for map_j in range(0, self.res[0]):
                if self.map[corner[0] + i][corner[1] + map_j]:
                    obs_states.add(int(self.states[i][map_j]))

        return obs_states

    def process_map(self, map):
        if map == "simple":
            self.targets = [[0, 1], [0, 1], [0, 1], [0, 1]]
            self.init = [[3, 0], [3, 2], [1, 0], [1, 2]]
            self.shared_goal = True
            # self.distance = True
            # self.collision = False
        elif map == "example":
            # example map
            self.targets = [[0, 2], [2, 0]]
            if self.collision:
                self.init = [[2, 0], [2, 4]]
            elif self.distance:
                self.targets = [[0, 2], [0, 2]]
                self.init = [[2, 0], [2, 1]]

        elif map == "ISR":
            # ISR map
            self.targets = [[6, 3], [7, 0], [6, 1], [9, 3]]
            if self.collision:
                self.init = [[7, 0], [6, 3], [7, 4], [6, 1]]
            elif self.distance:
                self.targets = [[0, 5], [0, 5], [0, 5], [0, 5]]
                self.init = [[9, 2], [9, 3], [8, 3], [7, 2]]


        elif map == "MIT":
            # MIT map
            self.targets = [[3, 16], [3, 0], [0, 12], [6, 6]]
            if self.collision:
                self.init = [[3, 0], [3, 16], [6, 6], [0, 12]]
            elif self.distance:
                self.targets = [[3, 16], [3, 16], [3, 16], [3, 16]]
                self.init = [[3, 0], [3, 1], [4, 1], [1, 1]]

        elif map == "Pentagon":
            # Pentagon
            self.targets = [[4, 10], [3, 7], [3, 5], [6, 5]]
            if self.collision:
                self.init = [[3, 7], [4, 10], [6, 5], [3, 5]]
            elif self.distance:
                self.targets = [[4, 10], [4, 10], [4, 10], [4, 10]]
                self.init = [[8, 0], [8, 1], [7, 1], [8, 2]]

        elif map == "SUNY":
            # SUNY map
            self.targets = [[8, 17], [3, 22], [6, 11], [5, 19]]
            if self.collision:
                self.init = [[3, 22], [8, 17], [5, 19], [7, 14]]
            elif self.distance:
                self.targets = [[3, 22], [3, 22], [3, 22], [3, 22]]
                self.init = [[1, 1], [2, 1], [3, 1], [4, 1]]

        elif map == "SUNYvar":
            # SUNY map
            self.targets = [[7, 7], [3, 22], [6, 13], [8, 17]]
            if self.collision:
                self.init = [[3, 22], [7, 7], [8, 17], [6, 13]]
            elif self.distance:
                self.targets = [[3, 22], [3, 22], [3, 22], [3, 22]]
                self.init = [[1, 1], [2, 1], [3, 1], [4, 1]]

        else:
            # unrecognized map
            print("unrecognized map error")
            exit(1)


def write_to_slugs_test_simple(infile, gw):
    for s in range(gw.nshields):
        print('Generating shield ', s)
        entry_states = gw.find_entries(s)
        entry_states_req = gw.find_entries(s, req=True)
        obs_states = gw.find_obstacles(s)
        oob = gw.res[0] * gw.res[1]  # out of bounds state

        filename = 'grid_shields/temp/' + infile + '_' + str(s) + '.structuredslugs'
        file = open(filename, 'w')

        for i in range(gw.shield_max[s]):
            file.write('[INPUT]\n')
            file.write('a_req{}:0...{}\n'.format(i, oob))
            file.write('a{}:0...{}\n\n'.format(i, oob))

            file.write('[OUTPUT]\n')
            file.write('same{}:0...{}\n'.format(i, 1))
            file.write('a_shield{}\n\n'.format(i))

        file.write('\n[ENV_INIT]\n')
        for i in range(gw.shield_max[s]):
            file.write('a_req{} = {}\n'.format(i, oob))
            file.write('a{} = {}\n'.format(i, oob))

        file.write('\n[SYS_INIT]\n')
        for i in range(gw.shield_max[s]):
            file.write('a_shield{}\n'.format(i))
            file.write('same{}={}\n'.format(i, 0))

        file.write('\n[ENV_TRANS]\n')
        states_list = np.reshape(gw.states, (1, -1))[0]
        states_list = states_list.astype(int)

        for i in range(gw.shield_max[s]):
            str_req = ''
            str_a = ''
            for j in states_list:  # j = state within shield

                # a_req transition
                v_req = gw.get_next_req(j, s, entry_states_req)
                str_req += 'a{} = {} -> a_req{} = {} '.format(i, j, i, j)
                # print('s', s, ' j:', j, ' valid_req: ', v_req)
                for k in v_req:
                    if int(k) != j:
                        str_req += ' \\/ a_req{} = {}'.format(i, int(k))
                str_req += '\n'

                # a transition
                v_a, _ = gw.get_next(j, s, entry_states)
                str_a += 'a{} = {} -> a{}\' = {} '.format(i, j, i, j)
                for k in v_a:
                    if int(k) != j:
                        str_a += ' \\/ (a_req{} = {} /\\ a{}\' = {}) '.format(i, int(k), i, int(k))
                str_a += '\n'

            # add entering the shield
            str_req += 'a{} = {} -> a_req{} = {} '.format(i, oob, i, oob)
            for e in entry_states_req:
                str_req += ' \\/ a_req{} = {}'.format(i, int(e))
            str_req += '\n'

            str_a += 'a{} = {} -> a{}\' = {} '.format(i, oob, i, oob)
            for e in entry_states:
                str_a += ' \\/ (a_req{} = {} /\\ a{}\' = {})'.format(i, int(e), i, int(e))
            str_a += '\n'

            file.write(str_req + '\n')
            file.write(str_a + '\n')
            # obstacles
            stri = ''
            for o in obs_states:
                stri += 'a{} != {} /\\ '.format(i, o)
            stri = stri[:-3] + '\n'
            file.write(stri)

            # shield functionality
            file.write('!a_shield{} -> a{}\' = a{}\n\n'.format(i, i, i))

        # writing env_trans
        file.write('\n[ENV_LIVENESS]\n')

        file.write('\n[SYS_TRANS]\n')
        for i in range(gw.shield_max[s]):
            for j in range(i + 1, gw.shield_max[s]):
                file.write(
                    'a{}\' != a{}\' | a{} = {} | a{} = {} | a{}\' = {} | a{}\' = {} \n'.format(i, j, i, oob, j, oob, i,
                                                                                               oob, j, oob))
                file.write('(a{}\' != a{} /\\ a{}\' != a{}) | a{} = {} | a{} = {}\n'.format(i, j, j, i, i, oob, j, oob))

            file.write('same{}\' = {} <-> (a_shield{}\')\n'.format(i, 0, i))

        # Writing sys_liveness
        # reach target
        file.write('\n[SYS_LIVENESS]\n')

        if gw.fair:
            # fairness for interference
            file.write('a_shield0\' | a_req0\'=a1\' \n')
            file.write('a_shield1\' | a0\'=a_req1\' \n')

        # Writing env_liveness
        file.close()


# main
if __name__ == "__main__":
    map = sys.argv[1]
    # file = open("map.txt")
    # map = file.read()
    # map = map [:-1]
    # file.close()

    # read number of agents
    n = int(sys.argv[2])
    # file = open("num_agents.txt")
    # n = file.read()
    # n = n [:-1]
    # file.close()

    name = sys.argv[3]
    # file = open("name.txt")
    # name = file.read()
    # name = name [:-1]
    # file.close()
    print(
        "----------------------------------------------------------------------------------\nGenerating Grid Shields for map:",
        map, "\n----------------------------------------------------------------------------------\n")
    gw = GridWorld(map, name, n)

    write_to_slugs_test_simple(name, gw)
