# Supplementary material
Source: ML conference proceedings conference paper supplement (https://proceedings.neurips.cc/paper_files/paper/2022/hash/57444e14ecd9e2c8f603b4f012ce3811-Abstract.html)
Supplement: Supplementary file 1 [file 57444e14ecd9e2c8f603b4f012ce3811-Supplemental-Conference.zip › 3410_shield_decentralization_for_sa-Supplementary Material/lib/from_ingy/grid_preprocessing.py]

# input = map_name resolution (width, length)
import sys

import numpy as np


def preprocessing(map, res=[3, 3]):
	# Read map from map_name to get width and length
	width = len(map)
	length = len(map[0])
	# print(" dim: ", width, length)

	lswitch = 0
	wswitch = 0

	while length % res[1] or width % res[0]:

		if length % res[1] != 0:
			length += 1
			if lswitch == 0:
				# pad first column
				for i in range(width):
					map[i].insert(0, 1)
				# map.insert(0, paddingh)
				lswitch = 1
			else:
				# pad last column
				for i in range(width):
					map[i].insert(length, 1)
				lswitch = 0

		paddingh = [1] * length

		if width % res[0] != 0:
			width += 1
			if wswitch == 0:
				# pad first row
				map.insert(0, paddingh)
				wswitch = 1
			else:
				# pad last row
				map.insert(len(map), paddingh)
				wswitch = 0

	# print(" dim: ", width, length)

	# print(" dim padded: ", width, length)
	# print(map)
	# fill smap with shieldnum for each cell
	smap = np.zeros([width, length])
	for i in range(width):
		for j in range(length):
			# 1 based shield number
			shieldnum = int((i / res[0])) * int(length / (res[1])) + int(j / res[0]) + 1
			smap[i][j] = shieldnum

	# print("SMAP: \n", smap)
	# Create coordinates list for each shield
	# Create vector1 = [0,1,2,..., (length/res[1]-1)]*res[1]
	# Create vector2 = [0,1,2,..., (width/res[0]-1)]*res[0]
	# Coordinates = [(vector1[i], vector2[i]) for i in range(length/res[1], width/res[0]) ]
	'''TODO : iron out exacty how to choose width, length '''
	v1 = [i for i in range(0, int(width / res[0]))]
	v1 = np.multiply(v1, res[0])

	v2 = [i for i in range(0, int(length / res[1]))]
	v2 = np.multiply(v2, res[1])

	coord = [[v1[i], v2[j]] for i in range(int(width / res[0])) for j in range(int(length / res[1]))]
	# print(" Coord: ", coord)

	return map, smap, coord


# main
if __name__ == "__main__":

	wr = None
	lr = None

	map_name = sys.argv[1]
	with open('maps/' + map_name + ".txt") as textFile:
		map = [line.split() for line in textFile]
	map = [[int(e) for e in row] for row in map]
	print(map)

	if len(sys.argv) > 2:
		wr = int(sys.argv[2])
		lr = int(sys.argv[3])

	if wr == None or lr == None:
		preprocessing(map)
	else:
		preprocessing(map, [wr, lr])
