# Supplementary material
Source: ML conference proceedings conference paper supplement (https://proceedings.neurips.cc/paper_files/paper/2022/hash/57444e14ecd9e2c8f603b4f012ce3811-Abstract.html)
Supplement: Supplementary file 1 [file 57444e14ecd9e2c8f603b4f012ce3811-Supplemental-Conference.zip › 3410_shield_decentralization_for_sa-Supplementary Material/lib/from_ingy/ISR_2_agents_2.structuredslugs]

[INPUT]
a_req0:0...9
a0:0...9

[OUTPUT]
same0:0...1
a_shield0

[INPUT]
a_req1:0...9
a1:0...9

[OUTPUT]
same1:0...1
a_shield1


[ENV_INIT]
a_req0 = 9
a0 = 9
a_req1 = 9
a1 = 9

[SYS_INIT]
a_shield0
same0=0
a_shield1
same1=0

[ENV_TRANS]
a0 = 0 -> a_req0 = 0  \/ a_req0 = 9 \/ a_req0 = 3 \/ a_req0 = 1
a0 = 1 -> a_req0 = 1  \/ a_req0 = 0 \/ a_req0 = 2 \/ a_req0 = 4
a0 = 2 -> a_req0 = 2  \/ a_req0 = 1 \/ a_req0 = 5
a0 = 3 -> a_req0 = 3  \/ a_req0 = 0 \/ a_req0 = 4 \/ a_req0 = 6 \/ a_req0 = 9
a0 = 4 -> a_req0 = 4  \/ a_req0 = 1 \/ a_req0 = 3 \/ a_req0 = 5 \/ a_req0 = 7
a0 = 5 -> a_req0 = 5  \/ a_req0 = 8 \/ a_req0 = 2 \/ a_req0 = 4
a0 = 6 -> a_req0 = 6  \/ a_req0 = 9 \/ a_req0 = 3 \/ a_req0 = 7
a0 = 7 -> a_req0 = 7  \/ a_req0 = 4 \/ a_req0 = 6 \/ a_req0 = 8 \/ a_req0 = 9
a0 = 8 -> a_req0 = 8  \/ a_req0 = 9 \/ a_req0 = 5 \/ a_req0 = 7
a0 = 9 -> a_req0 = 9  \/ a_req0 = 0 \/ a_req0 = 3 \/ a_req0 = 6 \/ a_req0 = 7 \/ a_req0 = 8

a0 = 0 -> a0' = 0 
a0 = 1 -> a0' = 1  \/ (a_req0 = 4 /\ a0' = 4) 
a0 = 2 -> a0' = 2 
a0 = 3 -> a0' = 3  \/ (a_req0 = 4 /\ a0' = 4)  \/ (a_req0 = 6 /\ a0' = 6) 
a0 = 4 -> a0' = 4  \/ (a_req0 = 7 /\ a0' = 7) 
a0 = 5 -> a0' = 5  \/ (a_req0 = 8 /\ a0' = 8)  \/ (a_req0 = 4 /\ a0' = 4) 
a0 = 6 -> a0' = 6  \/ (a_req0 = 9 /\ a0' = 9)  \/ (a_req0 = 7 /\ a0' = 7) 
a0 = 7 -> a0' = 7  \/ (a_req0 = 4 /\ a0' = 4)  \/ (a_req0 = 6 /\ a0' = 6)  \/ (a_req0 = 8 /\ a0' = 8)  \/ (a_req0 = 9 /\ a0' = 9) 
a0 = 8 -> a0' = 8  \/ (a_req0 = 7 /\ a0' = 7) 
a0 = 9 -> a0' = 9  \/ (a_req0 = 6 /\ a0' = 6) \/ (a_req0 = 7 /\ a0' = 7)

a0 != 0 /\ a0 != 1 /\ a0 != 2 /\ a0 != 3 /\ a0 != 5 
!a_shield0 -> a0' = a0

a1 = 0 -> a_req1 = 0  \/ a_req1 = 9 \/ a_req1 = 3 \/ a_req1 = 1
a1 = 1 -> a_req1 = 1  \/ a_req1 = 0 \/ a_req1 = 2 \/ a_req1 = 4
a1 = 2 -> a_req1 = 2  \/ a_req1 = 1 \/ a_req1 = 5
a1 = 3 -> a_req1 = 3  \/ a_req1 = 0 \/ a_req1 = 4 \/ a_req1 = 6 \/ a_req1 = 9
a1 = 4 -> a_req1 = 4  \/ a_req1 = 1 \/ a_req1 = 3 \/ a_req1 = 5 \/ a_req1 = 7
a1 = 5 -> a_req1 = 5  \/ a_req1 = 8 \/ a_req1 = 2 \/ a_req1 = 4
a1 = 6 -> a_req1 = 6  \/ a_req1 = 9 \/ a_req1 = 3 \/ a_req1 = 7
a1 = 7 -> a_req1 = 7  \/ a_req1 = 4 \/ a_req1 = 6 \/ a_req1 = 8 \/ a_req1 = 9
a1 = 8 -> a_req1 = 8  \/ a_req1 = 9 \/ a_req1 = 5 \/ a_req1 = 7
a1 = 9 -> a_req1 = 9  \/ a_req1 = 0 \/ a_req1 = 3 \/ a_req1 = 6 \/ a_req1 = 7 \/ a_req1 = 8

a1 = 0 -> a1' = 0 
a1 = 1 -> a1' = 1  \/ (a_req1 = 4 /\ a1' = 4) 
a1 = 2 -> a1' = 2 
a1 = 3 -> a1' = 3  \/ (a_req1 = 4 /\ a1' = 4)  \/ (a_req1 = 6 /\ a1' = 6) 
a1 = 4 -> a1' = 4  \/ (a_req1 = 7 /\ a1' = 7) 
a1 = 5 -> a1' = 5  \/ (a_req1 = 8 /\ a1' = 8)  \/ (a_req1 = 4 /\ a1' = 4) 
a1 = 6 -> a1' = 6  \/ (a_req1 = 9 /\ a1' = 9)  \/ (a_req1 = 7 /\ a1' = 7) 
a1 = 7 -> a1' = 7  \/ (a_req1 = 4 /\ a1' = 4)  \/ (a_req1 = 6 /\ a1' = 6)  \/ (a_req1 = 8 /\ a1' = 8)  \/ (a_req1 = 9 /\ a1' = 9) 
a1 = 8 -> a1' = 8  \/ (a_req1 = 7 /\ a1' = 7) 
a1 = 9 -> a1' = 9  \/ (a_req1 = 6 /\ a1' = 6) \/ (a_req1 = 7 /\ a1' = 7)

a1 != 0 /\ a1 != 1 /\ a1 != 2 /\ a1 != 3 /\ a1 != 5 
!a_shield1 -> a1' = a1


[ENV_LIVENESS]

[SYS_TRANS]
a0' != a1' | a0 = 9 | a1 = 9 | a0' = 9 | a1' = 9 
(a0' != a1 /\ a1' != a0) | a0 = 9 | a1 = 9
same0' = 0 <-> (a_shield0')
same1' = 0 <-> (a_shield1')

[SYS_LIVENESS]
