# Supplementary material
Source: ML conference proceedings conference paper supplement (https://proceedings.neurips.cc/paper_files/paper/2022/hash/57444e14ecd9e2c8f603b4f012ce3811-Abstract.html)
Supplement: Supplementary file 1 [file 57444e14ecd9e2c8f603b4f012ce3811-Supplemental-Conference.zip › 3410_shield_decentralization_for_sa-Supplementary Material/maps/MIT.txt]

A B
B A
---
1 1 0 1 0 1 0 1 1 1 1 1 0 1 0 1 1
1 0 0 0 0 0 0 0 0 0 0 0 0 0 0 0 1 
1 0 1 0 1 1 1 0 1 1 0 1 1 1 1 0 1 
A 0 1 0 1 1 1 0 0 0 0 1 1 1 1 0 B
1 0 1 0 1 1 1 0 1 1 0 1 1 1 1 0 1 
1 0 0 0 0 0 0 0 0 0 0 0 0 0 0 0 1 
1 1 0 1 0 1 0 1 1 1 1 1 0 1 0 1 1
