# Supplementary material
Source: ML conference proceedings conference paper supplement (https://proceedings.neurips.cc/paper_files/paper/2022/hash/57444e14ecd9e2c8f603b4f012ce3811-Abstract.html)
Supplement: Supplementary file 1 [file 57444e14ecd9e2c8f603b4f012ce3811-Supplemental-Conference.zip › 3410_shield_decentralization_for_sa-Supplementary Material/parallel_configs/1.csv]

run_name	shield	rew_modifier
q_learning_decentralized_shield_1	decentralized
q_learning_centralized_shield_1	centralized
q_learning_none_shield_1	none
q_learning_neg_rew_shield_1	neg_rew	-100
