# Supplementary material
Source: ML conference proceedings conference paper supplement (https://proceedings.neurips.cc/paper_files/paper/2022/hash/57444e14ecd9e2c8f603b4f012ce3811-Abstract.html)
Supplement: Supplementary file 1 [file 57444e14ecd9e2c8f603b4f012ce3811-Supplemental-Conference.zip › 3410_shield_decentralization_for_sa-Supplementary Material/parallel_configs/ContinuousGridworldEval.csv]

run_name	shield	shield_specification	punish_unsafe_orig_action	punish_unsafe_orig_action_modifier	randomize_starts	map_type	grid_world_map_name	grid_world_collision_penalty	grid_world_agents_bounce	grid_world_terminate_on_collision	learner_type	learner_anneal_eps_start	learner_deep_network_model	learner_transform_one_hot	learner_anneal_eps_finish	max_total_steps	seed	skip_training	evaluation_run_name	evaluation_shield	evaluation_shield_specification	learner_evaluation_epsilon
ContinuousGridworld/0_0_0	slugs_centralized	shields/general_shield_radius	True	-10	True	ContinuousGridWorld	Pentagon	-10	False	False	Individual_Deep_Q	1.0	norm_simple_mlp	False	0.05	10000000	0	True	ContinuousGridworld/0_0_0_slugs_centralized	slugs_centralized	shields/general_shield_radius	0.05
ContinuousGridworld/0_0_0	slugs_centralized	shields/general_shield_radius	True	-10	True	ContinuousGridWorld	Pentagon	-10	False	False	Individual_Deep_Q	1.0	norm_simple_mlp	False	0.05	10000000	0	True	ContinuousGridworld/0_0_0_slugs_decentralized	slugs_decentralized	shields/general_shield_radius	0.05
ContinuousGridworld/0_0_0	slugs_centralized	shields/general_shield_radius	True	-10	True	ContinuousGridWorld	Pentagon	-10	False	False	Individual_Deep_Q	1.0	norm_simple_mlp	False	0.05	10000000	0	True	ContinuousGridworld/0_0_0_none	none		0.05
ContinuousGridworld/1_0_1	slugs_centralized	shields/general_shield_radius	True	-10	True	ContinuousGridWorld	Pentagon	-10	False	False	Individual_Deep_Q	1.0	norm_simple_mlp	False	0.05	10000000	1	True	ContinuousGridworld/1_0_1_slugs_centralized	slugs_centralized	shields/general_shield_radius	0.05
ContinuousGridworld/1_0_1	slugs_centralized	shields/general_shield_radius	True	-10	True	ContinuousGridWorld	Pentagon	-10	False	False	Individual_Deep_Q	1.0	norm_simple_mlp	False	0.05	10000000	1	True	ContinuousGridworld/1_0_1_slugs_decentralized	slugs_decentralized	shields/general_shield_radius	0.05
ContinuousGridworld/1_0_1	slugs_centralized	shields/general_shield_radius	True	-10	True	ContinuousGridWorld	Pentagon	-10	False	False	Individual_Deep_Q	1.0	norm_simple_mlp	False	0.05	10000000	1	True	ContinuousGridworld/1_0_1_none	none		0.05
ContinuousGridworld/2_0_2	slugs_centralized	shields/general_shield_radius	True	-10	True	ContinuousGridWorld	Pentagon	-10	False	False	Individual_Deep_Q	1.0	norm_simple_mlp	False	0.05	10000000	2	True	ContinuousGridworld/2_0_2_slugs_centralized	slugs_centralized	shields/general_shield_radius	0.05
ContinuousGridworld/2_0_2	slugs_centralized	shields/general_shield_radius	True	-10	True	ContinuousGridWorld	Pentagon	-10	False	False	Individual_Deep_Q	1.0	norm_simple_mlp	False	0.05	10000000	2	True	ContinuousGridworld/2_0_2_slugs_decentralized	slugs_decentralized	shields/general_shield_radius	0.05
ContinuousGridworld/2_0_2	slugs_centralized	shields/general_shield_radius	True	-10	True	ContinuousGridWorld	Pentagon	-10	False	False	Individual_Deep_Q	1.0	norm_simple_mlp	False	0.05	10000000	2	True	ContinuousGridworld/2_0_2_none	none		0.05
ContinuousGridworld/3_0_3	slugs_centralized	shields/general_shield_radius	True	-10	True	ContinuousGridWorld	Pentagon	-10	False	False	Individual_Deep_Q	1.0	norm_simple_mlp	False	0.05	10000000	3	True	ContinuousGridworld/3_0_3_slugs_centralized	slugs_centralized	shields/general_shield_radius	0.05
ContinuousGridworld/3_0_3	slugs_centralized	shields/general_shield_radius	True	-10	True	ContinuousGridWorld	Pentagon	-10	False	False	Individual_Deep_Q	1.0	norm_simple_mlp	False	0.05	10000000	3	True	ContinuousGridworld/3_0_3_slugs_decentralized	slugs_decentralized	shields/general_shield_radius	0.05
ContinuousGridworld/3_0_3	slugs_centralized	shields/general_shield_radius	True	-10	True	ContinuousGridWorld	Pentagon	-10	False	False	Individual_Deep_Q	1.0	norm_simple_mlp	False	0.05	10000000	3	True	ContinuousGridworld/3_0_3_none	none		0.05
ContinuousGridworld/4_0_4	slugs_centralized	shields/general_shield_radius	True	-10	True	ContinuousGridWorld	Pentagon	-10	False	False	Individual_Deep_Q	1.0	norm_simple_mlp	False	0.05	10000000	4	True	ContinuousGridworld/4_0_4_slugs_centralized	slugs_centralized	shields/general_shield_radius	0.05
ContinuousGridworld/4_0_4	slugs_centralized	shields/general_shield_radius	True	-10	True	ContinuousGridWorld	Pentagon	-10	False	False	Individual_Deep_Q	1.0	norm_simple_mlp	False	0.05	10000000	4	True	ContinuousGridworld/4_0_4_slugs_decentralized	slugs_decentralized	shields/general_shield_radius	0.05
ContinuousGridworld/4_0_4	slugs_centralized	shields/general_shield_radius	True	-10	True	ContinuousGridWorld	Pentagon	-10	False	False	Individual_Deep_Q	1.0	norm_simple_mlp	False	0.05	10000000	4	True	ContinuousGridworld/4_0_4_none	none		0.05
ContinuousGridworld/5_0_5	slugs_centralized	shields/general_shield_radius	True	-10	True	ContinuousGridWorld	Pentagon	-10	False	False	Individual_Deep_Q	1.0	norm_simple_mlp	False	0.05	10000000	5	True	ContinuousGridworld/5_0_5_slugs_centralized	slugs_centralized	shields/general_shield_radius	0.05
ContinuousGridworld/5_0_5	slugs_centralized	shields/general_shield_radius	True	-10	True	ContinuousGridWorld	Pentagon	-10	False	False	Individual_Deep_Q	1.0	norm_simple_mlp	False	0.05	10000000	5	True	ContinuousGridworld/5_0_5_slugs_decentralized	slugs_decentralized	shields/general_shield_radius	0.05
ContinuousGridworld/5_0_5	slugs_centralized	shields/general_shield_radius	True	-10	True	ContinuousGridWorld	Pentagon	-10	False	False	Individual_Deep_Q	1.0	norm_simple_mlp	False	0.05	10000000	5	True	ContinuousGridworld/5_0_5_none	none		0.05
ContinuousGridworld/6_0_6	slugs_centralized	shields/general_shield_radius	True	-10	True	ContinuousGridWorld	Pentagon	-10	False	False	Individual_Deep_Q	1.0	norm_simple_mlp	False	0.05	10000000	6	True	ContinuousGridworld/6_0_6_slugs_centralized	slugs_centralized	shields/general_shield_radius	0.05
ContinuousGridworld/6_0_6	slugs_centralized	shields/general_shield_radius	True	-10	True	ContinuousGridWorld	Pentagon	-10	False	False	Individual_Deep_Q	1.0	norm_simple_mlp	False	0.05	10000000	6	True	ContinuousGridworld/6_0_6_slugs_decentralized	slugs_decentralized	shields/general_shield_radius	0.05
ContinuousGridworld/6_0_6	slugs_centralized	shields/general_shield_radius	True	-10	True	ContinuousGridWorld	Pentagon	-10	False	False	Individual_Deep_Q	1.0	norm_simple_mlp	False	0.05	10000000	6	True	ContinuousGridworld/6_0_6_none	none		0.05
ContinuousGridworld/7_0_7	slugs_centralized	shields/general_shield_radius	True	-10	True	ContinuousGridWorld	Pentagon	-10	False	False	Individual_Deep_Q	1.0	norm_simple_mlp	False	0.05	10000000	7	True	ContinuousGridworld/7_0_7_slugs_centralized	slugs_centralized	shields/general_shield_radius	0.05
ContinuousGridworld/7_0_7	slugs_centralized	shields/general_shield_radius	True	-10	True	ContinuousGridWorld	Pentagon	-10	False	False	Individual_Deep_Q	1.0	norm_simple_mlp	False	0.05	10000000	7	True	ContinuousGridworld/7_0_7_slugs_decentralized	slugs_decentralized	shields/general_shield_radius	0.05
ContinuousGridworld/7_0_7	slugs_centralized	shields/general_shield_radius	True	-10	True	ContinuousGridWorld	Pentagon	-10	False	False	Individual_Deep_Q	1.0	norm_simple_mlp	False	0.05	10000000	7	True	ContinuousGridworld/7_0_7_none	none		0.05
ContinuousGridworld/8_0_8	slugs_centralized	shields/general_shield_radius	True	-10	True	ContinuousGridWorld	Pentagon	-10	False	False	Individual_Deep_Q	1.0	norm_simple_mlp	False	0.05	10000000	8	True	ContinuousGridworld/8_0_8_slugs_centralized	slugs_centralized	shields/general_shield_radius	0.05
ContinuousGridworld/8_0_8	slugs_centralized	shields/general_shield_radius	True	-10	True	ContinuousGridWorld	Pentagon	-10	False	False	Individual_Deep_Q	1.0	norm_simple_mlp	False	0.05	10000000	8	True	ContinuousGridworld/8_0_8_slugs_decentralized	slugs_decentralized	shields/general_shield_radius	0.05
ContinuousGridworld/8_0_8	slugs_centralized	shields/general_shield_radius	True	-10	True	ContinuousGridWorld	Pentagon	-10	False	False	Individual_Deep_Q	1.0	norm_simple_mlp	False	0.05	10000000	8	True	ContinuousGridworld/8_0_8_none	none		0.05
ContinuousGridworld/9_0_9	slugs_centralized	shields/general_shield_radius	True	-10	True	ContinuousGridWorld	Pentagon	-10	False	False	Individual_Deep_Q	1.0	norm_simple_mlp	False	0.05	10000000	9	True	ContinuousGridworld/9_0_9_slugs_centralized	slugs_centralized	shields/general_shield_radius	0.05
ContinuousGridworld/9_0_9	slugs_centralized	shields/general_shield_radius	True	-10	True	ContinuousGridWorld	Pentagon	-10	False	False	Individual_Deep_Q	1.0	norm_simple_mlp	False	0.05	10000000	9	True	ContinuousGridworld/9_0_9_slugs_decentralized	slugs_decentralized	shields/general_shield_radius	0.05
ContinuousGridworld/9_0_9	slugs_centralized	shields/general_shield_radius	True	-10	True	ContinuousGridWorld	Pentagon	-10	False	False	Individual_Deep_Q	1.0	norm_simple_mlp	False	0.05	10000000	9	True	ContinuousGridworld/9_0_9_none	none		0.05
ContinuousGridworld/10_1_0	slugs_decentralized	shields/general_shield_radius	True	-10	True	ContinuousGridWorld	Pentagon	-10	False	False	Individual_Deep_Q	1.0	norm_simple_mlp	False	0.05	10000000	0	True	ContinuousGridworld/10_1_0_slugs_centralized	slugs_centralized	shields/general_shield_radius	0.05
ContinuousGridworld/10_1_0	slugs_decentralized	shields/general_shield_radius	True	-10	True	ContinuousGridWorld	Pentagon	-10	False	False	Individual_Deep_Q	1.0	norm_simple_mlp	False	0.05	10000000	0	True	ContinuousGridworld/10_1_0_slugs_decentralized	slugs_decentralized	shields/general_shield_radius	0.05
ContinuousGridworld/10_1_0	slugs_decentralized	shields/general_shield_radius	True	-10	True	ContinuousGridWorld	Pentagon	-10	False	False	Individual_Deep_Q	1.0	norm_simple_mlp	False	0.05	10000000	0	True	ContinuousGridworld/10_1_0_none	none		0.05
ContinuousGridworld/11_1_1	slugs_decentralized	shields/general_shield_radius	True	-10	True	ContinuousGridWorld	Pentagon	-10	False	False	Individual_Deep_Q	1.0	norm_simple_mlp	False	0.05	10000000	1	True	ContinuousGridworld/11_1_1_slugs_centralized	slugs_centralized	shields/general_shield_radius	0.05
ContinuousGridworld/11_1_1	slugs_decentralized	shields/general_shield_radius	True	-10	True	ContinuousGridWorld	Pentagon	-10	False	False	Individual_Deep_Q	1.0	norm_simple_mlp	False	0.05	10000000	1	True	ContinuousGridworld/11_1_1_slugs_decentralized	slugs_decentralized	shields/general_shield_radius	0.05
ContinuousGridworld/11_1_1	slugs_decentralized	shields/general_shield_radius	True	-10	True	ContinuousGridWorld	Pentagon	-10	False	False	Individual_Deep_Q	1.0	norm_simple_mlp	False	0.05	10000000	1	True	ContinuousGridworld/11_1_1_none	none		0.05
ContinuousGridworld/12_1_2	slugs_decentralized	shields/general_shield_radius	True	-10	True	ContinuousGridWorld	Pentagon	-10	False	False	Individual_Deep_Q	1.0	norm_simple_mlp	False	0.05	10000000	2	True	ContinuousGridworld/12_1_2_slugs_centralized	slugs_centralized	shields/general_shield_radius	0.05
ContinuousGridworld/12_1_2	slugs_decentralized	shields/general_shield_radius	True	-10	True	ContinuousGridWorld	Pentagon	-10	False	False	Individual_Deep_Q	1.0	norm_simple_mlp	False	0.05	10000000	2	True	ContinuousGridworld/12_1_2_slugs_decentralized	slugs_decentralized	shields/general_shield_radius	0.05
ContinuousGridworld/12_1_2	slugs_decentralized	shields/general_shield_radius	True	-10	True	ContinuousGridWorld	Pentagon	-10	False	False	Individual_Deep_Q	1.0	norm_simple_mlp	False	0.05	10000000	2	True	ContinuousGridworld/12_1_2_none	none		0.05
ContinuousGridworld/13_1_3	slugs_decentralized	shields/general_shield_radius	True	-10	True	ContinuousGridWorld	Pentagon	-10	False	False	Individual_Deep_Q	1.0	norm_simple_mlp	False	0.05	10000000	3	True	ContinuousGridworld/13_1_3_slugs_centralized	slugs_centralized	shields/general_shield_radius	0.05
ContinuousGridworld/13_1_3	slugs_decentralized	shields/general_shield_radius	True	-10	True	ContinuousGridWorld	Pentagon	-10	False	False	Individual_Deep_Q	1.0	norm_simple_mlp	False	0.05	10000000	3	True	ContinuousGridworld/13_1_3_slugs_decentralized	slugs_decentralized	shields/general_shield_radius	0.05
ContinuousGridworld/13_1_3	slugs_decentralized	shields/general_shield_radius	True	-10	True	ContinuousGridWorld	Pentagon	-10	False	False	Individual_Deep_Q	1.0	norm_simple_mlp	False	0.05	10000000	3	True	ContinuousGridworld/13_1_3_none	none		0.05
ContinuousGridworld/14_1_4	slugs_decentralized	shields/general_shield_radius	True	-10	True	ContinuousGridWorld	Pentagon	-10	False	False	Individual_Deep_Q	1.0	norm_simple_mlp	False	0.05	10000000	4	True	ContinuousGridworld/14_1_4_slugs_centralized	slugs_centralized	shields/general_shield_radius	0.05
ContinuousGridworld/14_1_4	slugs_decentralized	shields/general_shield_radius	True	-10	True	ContinuousGridWorld	Pentagon	-10	False	False	Individual_Deep_Q	1.0	norm_simple_mlp	False	0.05	10000000	4	True	ContinuousGridworld/14_1_4_slugs_decentralized	slugs_decentralized	shields/general_shield_radius	0.05
ContinuousGridworld/14_1_4	slugs_decentralized	shields/general_shield_radius	True	-10	True	ContinuousGridWorld	Pentagon	-10	False	False	Individual_Deep_Q	1.0	norm_simple_mlp	False	0.05	10000000	4	True	ContinuousGridworld/14_1_4_none	none		0.05
ContinuousGridworld/15_1_5	slugs_decentralized	shields/general_shield_radius	True	-10	True	ContinuousGridWorld	Pentagon	-10	False	False	Individual_Deep_Q	1.0	norm_simple_mlp	False	0.05	10000000	5	True	ContinuousGridworld/15_1_5_slugs_centralized	slugs_centralized	shields/general_shield_radius	0.05
ContinuousGridworld/15_1_5	slugs_decentralized	shields/general_shield_radius	True	-10	True	ContinuousGridWorld	Pentagon	-10	False	False	Individual_Deep_Q	1.0	norm_simple_mlp	False	0.05	10000000	5	True	ContinuousGridworld/15_1_5_slugs_decentralized	slugs_decentralized	shields/general_shield_radius	0.05
ContinuousGridworld/15_1_5	slugs_decentralized	shields/general_shield_radius	True	-10	True	ContinuousGridWorld	Pentagon	-10	False	False	Individual_Deep_Q	1.0	norm_simple_mlp	False	0.05	10000000	5	True	ContinuousGridworld/15_1_5_none	none		0.05
ContinuousGridworld/16_1_6	slugs_decentralized	shields/general_shield_radius	True	-10	True	ContinuousGridWorld	Pentagon	-10	False	False	Individual_Deep_Q	1.0	norm_simple_mlp	False	0.05	10000000	6	True	ContinuousGridworld/16_1_6_slugs_centralized	slugs_centralized	shields/general_shield_radius	0.05
ContinuousGridworld/16_1_6	slugs_decentralized	shields/general_shield_radius	True	-10	True	ContinuousGridWorld	Pentagon	-10	False	False	Individual_Deep_Q	1.0	norm_simple_mlp	False	0.05	10000000	6	True	ContinuousGridworld/16_1_6_slugs_decentralized	slugs_decentralized	shields/general_shield_radius	0.05
ContinuousGridworld/16_1_6	slugs_decentralized	shields/general_shield_radius	True	-10	True	ContinuousGridWorld	Pentagon	-10	False	False	Individual_Deep_Q	1.0	norm_simple_mlp	False	0.05	10000000	6	True	ContinuousGridworld/16_1_6_none	none		0.05
ContinuousGridworld/17_1_7	slugs_decentralized	shields/general_shield_radius	True	-10	True	ContinuousGridWorld	Pentagon	-10	False	False	Individual_Deep_Q	1.0	norm_simple_mlp	False	0.05	10000000	7	True	ContinuousGridworld/17_1_7_slugs_centralized	slugs_centralized	shields/general_shield_radius	0.05
ContinuousGridworld/17_1_7	slugs_decentralized	shields/general_shield_radius	True	-10	True	ContinuousGridWorld	Pentagon	-10	False	False	Individual_Deep_Q	1.0	norm_simple_mlp	False	0.05	10000000	7	True	ContinuousGridworld/17_1_7_slugs_decentralized	slugs_decentralized	shields/general_shield_radius	0.05
ContinuousGridworld/17_1_7	slugs_decentralized	shields/general_shield_radius	True	-10	True	ContinuousGridWorld	Pentagon	-10	False	False	Individual_Deep_Q	1.0	norm_simple_mlp	False	0.05	10000000	7	True	ContinuousGridworld/17_1_7_none	none		0.05
ContinuousGridworld/18_1_8	slugs_decentralized	shields/general_shield_radius	True	-10	True	ContinuousGridWorld	Pentagon	-10	False	False	Individual_Deep_Q	1.0	norm_simple_mlp	False	0.05	10000000	8	True	ContinuousGridworld/18_1_8_slugs_centralized	slugs_centralized	shields/general_shield_radius	0.05
ContinuousGridworld/18_1_8	slugs_decentralized	shields/general_shield_radius	True	-10	True	ContinuousGridWorld	Pentagon	-10	False	False	Individual_Deep_Q	1.0	norm_simple_mlp	False	0.05	10000000	8	True	ContinuousGridworld/18_1_8_slugs_decentralized	slugs_decentralized	shields/general_shield_radius	0.05
ContinuousGridworld/18_1_8	slugs_decentralized	shields/general_shield_radius	True	-10	True	ContinuousGridWorld	Pentagon	-10	False	False	Individual_Deep_Q	1.0	norm_simple_mlp	False	0.05	10000000	8	True	ContinuousGridworld/18_1_8_none	none		0.05
ContinuousGridworld/19_1_9	slugs_decentralized	shields/general_shield_radius	True	-10	True	ContinuousGridWorld	Pentagon	-10	False	False	Individual_Deep_Q	1.0	norm_simple_mlp	False	0.05	10000000	9	True	ContinuousGridworld/19_1_9_slugs_centralized	slugs_centralized	shields/general_shield_radius	0.05
ContinuousGridworld/19_1_9	slugs_decentralized	shields/general_shield_radius	True	-10	True	ContinuousGridWorld	Pentagon	-10	False	False	Individual_Deep_Q	1.0	norm_simple_mlp	False	0.05	10000000	9	True	ContinuousGridworld/19_1_9_slugs_decentralized	slugs_decentralized	shields/general_shield_radius	0.05
ContinuousGridworld/19_1_9	slugs_decentralized	shields/general_shield_radius	True	-10	True	ContinuousGridWorld	Pentagon	-10	False	False	Individual_Deep_Q	1.0	norm_simple_mlp	False	0.05	10000000	9	True	ContinuousGridworld/19_1_9_none	none		0.05
ContinuousGridworld/20_2_0	none		True	-10	True	ContinuousGridWorld	Pentagon	-10	False	False	Individual_Deep_Q	1.0	norm_simple_mlp	False	0.05	10000000	0	True	ContinuousGridworld/20_2_0_slugs_centralized	slugs_centralized	shields/general_shield_radius	0.05
ContinuousGridworld/20_2_0	none		True	-10	True	ContinuousGridWorld	Pentagon	-10	False	False	Individual_Deep_Q	1.0	norm_simple_mlp	False	0.05	10000000	0	True	ContinuousGridworld/20_2_0_slugs_decentralized	slugs_decentralized	shields/general_shield_radius	0.05
ContinuousGridworld/20_2_0	none		True	-10	True	ContinuousGridWorld	Pentagon	-10	False	False	Individual_Deep_Q	1.0	norm_simple_mlp	False	0.05	10000000	0	True	ContinuousGridworld/20_2_0_none	none		0.05
ContinuousGridworld/21_2_1	none		True	-10	True	ContinuousGridWorld	Pentagon	-10	False	False	Individual_Deep_Q	1.0	norm_simple_mlp	False	0.05	10000000	1	True	ContinuousGridworld/21_2_1_slugs_centralized	slugs_centralized	shields/general_shield_radius	0.05
ContinuousGridworld/21_2_1	none		True	-10	True	ContinuousGridWorld	Pentagon	-10	False	False	Individual_Deep_Q	1.0	norm_simple_mlp	False	0.05	10000000	1	True	ContinuousGridworld/21_2_1_slugs_decentralized	slugs_decentralized	shields/general_shield_radius	0.05
ContinuousGridworld/21_2_1	none		True	-10	True	ContinuousGridWorld	Pentagon	-10	False	False	Individual_Deep_Q	1.0	norm_simple_mlp	False	0.05	10000000	1	True	ContinuousGridworld/21_2_1_none	none		0.05
ContinuousGridworld/22_2_2	none		True	-10	True	ContinuousGridWorld	Pentagon	-10	False	False	Individual_Deep_Q	1.0	norm_simple_mlp	False	0.05	10000000	2	True	ContinuousGridworld/22_2_2_slugs_centralized	slugs_centralized	shields/general_shield_radius	0.05
ContinuousGridworld/22_2_2	none		True	-10	True	ContinuousGridWorld	Pentagon	-10	False	False	Individual_Deep_Q	1.0	norm_simple_mlp	False	0.05	10000000	2	True	ContinuousGridworld/22_2_2_slugs_decentralized	slugs_decentralized	shields/general_shield_radius	0.05
ContinuousGridworld/22_2_2	none		True	-10	True	ContinuousGridWorld	Pentagon	-10	False	False	Individual_Deep_Q	1.0	norm_simple_mlp	False	0.05	10000000	2	True	ContinuousGridworld/22_2_2_none	none		0.05
ContinuousGridworld/23_2_3	none		True	-10	True	ContinuousGridWorld	Pentagon	-10	False	False	Individual_Deep_Q	1.0	norm_simple_mlp	False	0.05	10000000	3	True	ContinuousGridworld/23_2_3_slugs_centralized	slugs_centralized	shields/general_shield_radius	0.05
ContinuousGridworld/23_2_3	none		True	-10	True	ContinuousGridWorld	Pentagon	-10	False	False	Individual_Deep_Q	1.0	norm_simple_mlp	False	0.05	10000000	3	True	ContinuousGridworld/23_2_3_slugs_decentralized	slugs_decentralized	shields/general_shield_radius	0.05
ContinuousGridworld/23_2_3	none		True	-10	True	ContinuousGridWorld	Pentagon	-10	False	False	Individual_Deep_Q	1.0	norm_simple_mlp	False	0.05	10000000	3	True	ContinuousGridworld/23_2_3_none	none		0.05
ContinuousGridworld/24_2_4	none		True	-10	True	ContinuousGridWorld	Pentagon	-10	False	False	Individual_Deep_Q	1.0	norm_simple_mlp	False	0.05	10000000	4	True	ContinuousGridworld/24_2_4_slugs_centralized	slugs_centralized	shields/general_shield_radius	0.05
ContinuousGridworld/24_2_4	none		True	-10	True	ContinuousGridWorld	Pentagon	-10	False	False	Individual_Deep_Q	1.0	norm_simple_mlp	False	0.05	10000000	4	True	ContinuousGridworld/24_2_4_slugs_decentralized	slugs_decentralized	shields/general_shield_radius	0.05
ContinuousGridworld/24_2_4	none		True	-10	True	ContinuousGridWorld	Pentagon	-10	False	False	Individual_Deep_Q	1.0	norm_simple_mlp	False	0.05	10000000	4	True	ContinuousGridworld/24_2_4_none	none		0.05
ContinuousGridworld/25_2_5	none		True	-10	True	ContinuousGridWorld	Pentagon	-10	False	False	Individual_Deep_Q	1.0	norm_simple_mlp	False	0.05	10000000	5	True	ContinuousGridworld/25_2_5_slugs_centralized	slugs_centralized	shields/general_shield_radius	0.05
ContinuousGridworld/25_2_5	none		True	-10	True	ContinuousGridWorld	Pentagon	-10	False	False	Individual_Deep_Q	1.0	norm_simple_mlp	False	0.05	10000000	5	True	ContinuousGridworld/25_2_5_slugs_decentralized	slugs_decentralized	shields/general_shield_radius	0.05
ContinuousGridworld/25_2_5	none		True	-10	True	ContinuousGridWorld	Pentagon	-10	False	False	Individual_Deep_Q	1.0	norm_simple_mlp	False	0.05	10000000	5	True	ContinuousGridworld/25_2_5_none	none		0.05
ContinuousGridworld/26_2_6	none		True	-10	True	ContinuousGridWorld	Pentagon	-10	False	False	Individual_Deep_Q	1.0	norm_simple_mlp	False	0.05	10000000	6	True	ContinuousGridworld/26_2_6_slugs_centralized	slugs_centralized	shields/general_shield_radius	0.05
ContinuousGridworld/26_2_6	none		True	-10	True	ContinuousGridWorld	Pentagon	-10	False	False	Individual_Deep_Q	1.0	norm_simple_mlp	False	0.05	10000000	6	True	ContinuousGridworld/26_2_6_slugs_decentralized	slugs_decentralized	shields/general_shield_radius	0.05
ContinuousGridworld/26_2_6	none		True	-10	True	ContinuousGridWorld	Pentagon	-10	False	False	Individual_Deep_Q	1.0	norm_simple_mlp	False	0.05	10000000	6	True	ContinuousGridworld/26_2_6_none	none		0.05
ContinuousGridworld/27_2_7	none		True	-10	True	ContinuousGridWorld	Pentagon	-10	False	False	Individual_Deep_Q	1.0	norm_simple_mlp	False	0.05	10000000	7	True	ContinuousGridworld/27_2_7_slugs_centralized	slugs_centralized	shields/general_shield_radius	0.05
ContinuousGridworld/27_2_7	none		True	-10	True	ContinuousGridWorld	Pentagon	-10	False	False	Individual_Deep_Q	1.0	norm_simple_mlp	False	0.05	10000000	7	True	ContinuousGridworld/27_2_7_slugs_decentralized	slugs_decentralized	shields/general_shield_radius	0.05
ContinuousGridworld/27_2_7	none		True	-10	True	ContinuousGridWorld	Pentagon	-10	False	False	Individual_Deep_Q	1.0	norm_simple_mlp	False	0.05	10000000	7	True	ContinuousGridworld/27_2_7_none	none		0.05
ContinuousGridworld/28_2_8	none		True	-10	True	ContinuousGridWorld	Pentagon	-10	False	False	Individual_Deep_Q	1.0	norm_simple_mlp	False	0.05	10000000	8	True	ContinuousGridworld/28_2_8_slugs_centralized	slugs_centralized	shields/general_shield_radius	0.05
ContinuousGridworld/28_2_8	none		True	-10	True	ContinuousGridWorld	Pentagon	-10	False	False	Individual_Deep_Q	1.0	norm_simple_mlp	False	0.05	10000000	8	True	ContinuousGridworld/28_2_8_slugs_decentralized	slugs_decentralized	shields/general_shield_radius	0.05
ContinuousGridworld/28_2_8	none		True	-10	True	ContinuousGridWorld	Pentagon	-10	False	False	Individual_Deep_Q	1.0	norm_simple_mlp	False	0.05	10000000	8	True	ContinuousGridworld/28_2_8_none	none		0.05
ContinuousGridworld/29_2_9	none		True	-10	True	ContinuousGridWorld	Pentagon	-10	False	False	Individual_Deep_Q	1.0	norm_simple_mlp	False	0.05	10000000	9	True	ContinuousGridworld/29_2_9_slugs_centralized	slugs_centralized	shields/general_shield_radius	0.05
ContinuousGridworld/29_2_9	none		True	-10	True	ContinuousGridWorld	Pentagon	-10	False	False	Individual_Deep_Q	1.0	norm_simple_mlp	False	0.05	10000000	9	True	ContinuousGridworld/29_2_9_slugs_decentralized	slugs_decentralized	shields/general_shield_radius	0.05
ContinuousGridworld/29_2_9	none		True	-10	True	ContinuousGridWorld	Pentagon	-10	False	False	Individual_Deep_Q	1.0	norm_simple_mlp	False	0.05	10000000	9	True	ContinuousGridworld/29_2_9_none	none		0.05
ContinuousGridworld/30_3_0	slugs_centralized	shields/general_shield_radius	True	-10	False	ContinuousGridWorld	Pentagon	-10	False	False	Individual_Deep_Q	1.0	norm_simple_mlp	False	0.05	10000000	0	True	ContinuousGridworld/30_3_0_slugs_centralized	slugs_centralized	shields/general_shield_radius	0.05
ContinuousGridworld/30_3_0	slugs_centralized	shields/general_shield_radius	True	-10	False	ContinuousGridWorld	Pentagon	-10	False	False	Individual_Deep_Q	1.0	norm_simple_mlp	False	0.05	10000000	0	True	ContinuousGridworld/30_3_0_slugs_decentralized	slugs_decentralized	shields/general_shield_radius	0.05
ContinuousGridworld/30_3_0	slugs_centralized	shields/general_shield_radius	True	-10	False	ContinuousGridWorld	Pentagon	-10	False	False	Individual_Deep_Q	1.0	norm_simple_mlp	False	0.05	10000000	0	True	ContinuousGridworld/30_3_0_none	none		0.05
ContinuousGridworld/31_3_1	slugs_centralized	shields/general_shield_radius	True	-10	False	ContinuousGridWorld	Pentagon	-10	False	False	Individual_Deep_Q	1.0	norm_simple_mlp	False	0.05	10000000	1	True	ContinuousGridworld/31_3_1_slugs_centralized	slugs_centralized	shields/general_shield_radius	0.05
ContinuousGridworld/31_3_1	slugs_centralized	shields/general_shield_radius	True	-10	False	ContinuousGridWorld	Pentagon	-10	False	False	Individual_Deep_Q	1.0	norm_simple_mlp	False	0.05	10000000	1	True	ContinuousGridworld/31_3_1_slugs_decentralized	slugs_decentralized	shields/general_shield_radius	0.05
ContinuousGridworld/31_3_1	slugs_centralized	shields/general_shield_radius	True	-10	False	ContinuousGridWorld	Pentagon	-10	False	False	Individual_Deep_Q	1.0	norm_simple_mlp	False	0.05	10000000	1	True	ContinuousGridworld/31_3_1_none	none		0.05
ContinuousGridworld/32_3_2	slugs_centralized	shields/general_shield_radius	True	-10	False	ContinuousGridWorld	Pentagon	-10	False	False	Individual_Deep_Q	1.0	norm_simple_mlp	False	0.05	10000000	2	True	ContinuousGridworld/32_3_2_slugs_centralized	slugs_centralized	shields/general_shield_radius	0.05
ContinuousGridworld/32_3_2	slugs_centralized	shields/general_shield_radius	True	-10	False	ContinuousGridWorld	Pentagon	-10	False	False	Individual_Deep_Q	1.0	norm_simple_mlp	False	0.05	10000000	2	True	ContinuousGridworld/32_3_2_slugs_decentralized	slugs_decentralized	shields/general_shield_radius	0.05
ContinuousGridworld/32_3_2	slugs_centralized	shields/general_shield_radius	True	-10	False	ContinuousGridWorld	Pentagon	-10	False	False	Individual_Deep_Q	1.0	norm_simple_mlp	False	0.05	10000000	2	True	ContinuousGridworld/32_3_2_none	none		0.05
ContinuousGridworld/33_3_3	slugs_centralized	shields/general_shield_radius	True	-10	False	ContinuousGridWorld	Pentagon	-10	False	False	Individual_Deep_Q	1.0	norm_simple_mlp	False	0.05	10000000	3	True	ContinuousGridworld/33_3_3_slugs_centralized	slugs_centralized	shields/general_shield_radius	0.05
ContinuousGridworld/33_3_3	slugs_centralized	shields/general_shield_radius	True	-10	False	ContinuousGridWorld	Pentagon	-10	False	False	Individual_Deep_Q	1.0	norm_simple_mlp	False	0.05	10000000	3	True	ContinuousGridworld/33_3_3_slugs_decentralized	slugs_decentralized	shields/general_shield_radius	0.05
ContinuousGridworld/33_3_3	slugs_centralized	shields/general_shield_radius	True	-10	False	ContinuousGridWorld	Pentagon	-10	False	False	Individual_Deep_Q	1.0	norm_simple_mlp	False	0.05	10000000	3	True	ContinuousGridworld/33_3_3_none	none		0.05
ContinuousGridworld/34_3_4	slugs_centralized	shields/general_shield_radius	True	-10	False	ContinuousGridWorld	Pentagon	-10	False	False	Individual_Deep_Q	1.0	norm_simple_mlp	False	0.05	10000000	4	True	ContinuousGridworld/34_3_4_slugs_centralized	slugs_centralized	shields/general_shield_radius	0.05
ContinuousGridworld/34_3_4	slugs_centralized	shields/general_shield_radius	True	-10	False	ContinuousGridWorld	Pentagon	-10	False	False	Individual_Deep_Q	1.0	norm_simple_mlp	False	0.05	10000000	4	True	ContinuousGridworld/34_3_4_slugs_decentralized	slugs_decentralized	shields/general_shield_radius	0.05
ContinuousGridworld/34_3_4	slugs_centralized	shields/general_shield_radius	True	-10	False	ContinuousGridWorld	Pentagon	-10	False	False	Individual_Deep_Q	1.0	norm_simple_mlp	False	0.05	10000000	4	True	ContinuousGridworld/34_3_4_none	none		0.05
ContinuousGridworld/35_3_5	slugs_centralized	shields/general_shield_radius	True	-10	False	ContinuousGridWorld	Pentagon	-10	False	False	Individual_Deep_Q	1.0	norm_simple_mlp	False	0.05	10000000	5	True	ContinuousGridworld/35_3_5_slugs_centralized	slugs_centralized	shields/general_shield_radius	0.05
ContinuousGridworld/35_3_5	slugs_centralized	shields/general_shield_radius	True	-10	False	ContinuousGridWorld	Pentagon	-10	False	False	Individual_Deep_Q	1.0	norm_simple_mlp	False	0.05	10000000	5	True	ContinuousGridworld/35_3_5_slugs_decentralized	slugs_decentralized	shields/general_shield_radius	0.05
ContinuousGridworld/35_3_5	slugs_centralized	shields/general_shield_radius	True	-10	False	ContinuousGridWorld	Pentagon	-10	False	False	Individual_Deep_Q	1.0	norm_simple_mlp	False	0.05	10000000	5	True	ContinuousGridworld/35_3_5_none	none		0.05
ContinuousGridworld/36_3_6	slugs_centralized	shields/general_shield_radius	True	-10	False	ContinuousGridWorld	Pentagon	-10	False	False	Individual_Deep_Q	1.0	norm_simple_mlp	False	0.05	10000000	6	True	ContinuousGridworld/36_3_6_slugs_centralized	slugs_centralized	shields/general_shield_radius	0.05
ContinuousGridworld/36_3_6	slugs_centralized	shields/general_shield_radius	True	-10	False	ContinuousGridWorld	Pentagon	-10	False	False	Individual_Deep_Q	1.0	norm_simple_mlp	False	0.05	10000000	6	True	ContinuousGridworld/36_3_6_slugs_decentralized	slugs_decentralized	shields/general_shield_radius	0.05
ContinuousGridworld/36_3_6	slugs_centralized	shields/general_shield_radius	True	-10	False	ContinuousGridWorld	Pentagon	-10	False	False	Individual_Deep_Q	1.0	norm_simple_mlp	False	0.05	10000000	6	True	ContinuousGridworld/36_3_6_none	none		0.05
ContinuousGridworld/37_3_7	slugs_centralized	shields/general_shield_radius	True	-10	False	ContinuousGridWorld	Pentagon	-10	False	False	Individual_Deep_Q	1.0	norm_simple_mlp	False	0.05	10000000	7	True	ContinuousGridworld/37_3_7_slugs_centralized	slugs_centralized	shields/general_shield_radius	0.05
ContinuousGridworld/37_3_7	slugs_centralized	shields/general_shield_radius	True	-10	False	ContinuousGridWorld	Pentagon	-10	False	False	Individual_Deep_Q	1.0	norm_simple_mlp	False	0.05	10000000	7	True	ContinuousGridworld/37_3_7_slugs_decentralized	slugs_decentralized	shields/general_shield_radius	0.05
ContinuousGridworld/37_3_7	slugs_centralized	shields/general_shield_radius	True	-10	False	ContinuousGridWorld	Pentagon	-10	False	False	Individual_Deep_Q	1.0	norm_simple_mlp	False	0.05	10000000	7	True	ContinuousGridworld/37_3_7_none	none		0.05
ContinuousGridworld/38_3_8	slugs_centralized	shields/general_shield_radius	True	-10	False	ContinuousGridWorld	Pentagon	-10	False	False	Individual_Deep_Q	1.0	norm_simple_mlp	False	0.05	10000000	8	True	ContinuousGridworld/38_3_8_slugs_centralized	slugs_centralized	shields/general_shield_radius	0.05
ContinuousGridworld/38_3_8	slugs_centralized	shields/general_shield_radius	True	-10	False	ContinuousGridWorld	Pentagon	-10	False	False	Individual_Deep_Q	1.0	norm_simple_mlp	False	0.05	10000000	8	True	ContinuousGridworld/38_3_8_slugs_decentralized	slugs_decentralized	shields/general_shield_radius	0.05
ContinuousGridworld/38_3_8	slugs_centralized	shields/general_shield_radius	True	-10	False	ContinuousGridWorld	Pentagon	-10	False	False	Individual_Deep_Q	1.0	norm_simple_mlp	False	0.05	10000000	8	True	ContinuousGridworld/38_3_8_none	none		0.05
ContinuousGridworld/39_3_9	slugs_centralized	shields/general_shield_radius	True	-10	False	ContinuousGridWorld	Pentagon	-10	False	False	Individual_Deep_Q	1.0	norm_simple_mlp	False	0.05	10000000	9	True	ContinuousGridworld/39_3_9_slugs_centralized	slugs_centralized	shields/general_shield_radius	0.05
ContinuousGridworld/39_3_9	slugs_centralized	shields/general_shield_radius	True	-10	False	ContinuousGridWorld	Pentagon	-10	False	False	Individual_Deep_Q	1.0	norm_simple_mlp	False	0.05	10000000	9	True	ContinuousGridworld/39_3_9_slugs_decentralized	slugs_decentralized	shields/general_shield_radius	0.05
ContinuousGridworld/39_3_9	slugs_centralized	shields/general_shield_radius	True	-10	False	ContinuousGridWorld	Pentagon	-10	False	False	Individual_Deep_Q	1.0	norm_simple_mlp	False	0.05	10000000	9	True	ContinuousGridworld/39_3_9_none	none		0.05
ContinuousGridworld/40_4_0	slugs_decentralized	shields/general_shield_radius	True	-10	False	ContinuousGridWorld	Pentagon	-10	False	False	Individual_Deep_Q	1.0	norm_simple_mlp	False	0.05	10000000	0	True	ContinuousGridworld/40_4_0_slugs_centralized	slugs_centralized	shields/general_shield_radius	0.05
ContinuousGridworld/40_4_0	slugs_decentralized	shields/general_shield_radius	True	-10	False	ContinuousGridWorld	Pentagon	-10	False	False	Individual_Deep_Q	1.0	norm_simple_mlp	False	0.05	10000000	0	True	ContinuousGridworld/40_4_0_slugs_decentralized	slugs_decentralized	shields/general_shield_radius	0.05
ContinuousGridworld/40_4_0	slugs_decentralized	shields/general_shield_radius	True	-10	False	ContinuousGridWorld	Pentagon	-10	False	False	Individual_Deep_Q	1.0	norm_simple_mlp	False	0.05	10000000	0	True	ContinuousGridworld/40_4_0_none	none		0.05
ContinuousGridworld/41_4_1	slugs_decentralized	shields/general_shield_radius	True	-10	False	ContinuousGridWorld	Pentagon	-10	False	False	Individual_Deep_Q	1.0	norm_simple_mlp	False	0.05	10000000	1	True	ContinuousGridworld/41_4_1_slugs_centralized	slugs_centralized	shields/general_shield_radius	0.05
ContinuousGridworld/41_4_1	slugs_decentralized	shields/general_shield_radius	True	-10	False	ContinuousGridWorld	Pentagon	-10	False	False	Individual_Deep_Q	1.0	norm_simple_mlp	False	0.05	10000000	1	True	ContinuousGridworld/41_4_1_slugs_decentralized	slugs_decentralized	shields/general_shield_radius	0.05
ContinuousGridworld/41_4_1	slugs_decentralized	shields/general_shield_radius	True	-10	False	ContinuousGridWorld	Pentagon	-10	False	False	Individual_Deep_Q	1.0	norm_simple_mlp	False	0.05	10000000	1	True	ContinuousGridworld/41_4_1_none	none		0.05
ContinuousGridworld/42_4_2	slugs_decentralized	shields/general_shield_radius	True	-10	False	ContinuousGridWorld	Pentagon	-10	False	False	Individual_Deep_Q	1.0	norm_simple_mlp	False	0.05	10000000	2	True	ContinuousGridworld/42_4_2_slugs_centralized	slugs_centralized	shields/general_shield_radius	0.05
ContinuousGridworld/42_4_2	slugs_decentralized	shields/general_shield_radius	True	-10	False	ContinuousGridWorld	Pentagon	-10	False	False	Individual_Deep_Q	1.0	norm_simple_mlp	False	0.05	10000000	2	True	ContinuousGridworld/42_4_2_slugs_decentralized	slugs_decentralized	shields/general_shield_radius	0.05
ContinuousGridworld/42_4_2	slugs_decentralized	shields/general_shield_radius	True	-10	False	ContinuousGridWorld	Pentagon	-10	False	False	Individual_Deep_Q	1.0	norm_simple_mlp	False	0.05	10000000	2	True	ContinuousGridworld/42_4_2_none	none		0.05
ContinuousGridworld/43_4_3	slugs_decentralized	shields/general_shield_radius	True	-10	False	ContinuousGridWorld	Pentagon	-10	False	False	Individual_Deep_Q	1.0	norm_simple_mlp	False	0.05	10000000	3	True	ContinuousGridworld/43_4_3_slugs_centralized	slugs_centralized	shields/general_shield_radius	0.05
ContinuousGridworld/43_4_3	slugs_decentralized	shields/general_shield_radius	True	-10	False	ContinuousGridWorld	Pentagon	-10	False	False	Individual_Deep_Q	1.0	norm_simple_mlp	False	0.05	10000000	3	True	ContinuousGridworld/43_4_3_slugs_decentralized	slugs_decentralized	shields/general_shield_radius	0.05
ContinuousGridworld/43_4_3	slugs_decentralized	shields/general_shield_radius	True	-10	False	ContinuousGridWorld	Pentagon	-10	False	False	Individual_Deep_Q	1.0	norm_simple_mlp	False	0.05	10000000	3	True	ContinuousGridworld/43_4_3_none	none		0.05
ContinuousGridworld/44_4_4	slugs_decentralized	shields/general_shield_radius	True	-10	False	ContinuousGridWorld	Pentagon	-10	False	False	Individual_Deep_Q	1.0	norm_simple_mlp	False	0.05	10000000	4	True	ContinuousGridworld/44_4_4_slugs_centralized	slugs_centralized	shields/general_shield_radius	0.05
ContinuousGridworld/44_4_4	slugs_decentralized	shields/general_shield_radius	True	-10	False	ContinuousGridWorld	Pentagon	-10	False	False	Individual_Deep_Q	1.0	norm_simple_mlp	False	0.05	10000000	4	True	ContinuousGridworld/44_4_4_slugs_decentralized	slugs_decentralized	shields/general_shield_radius	0.05
ContinuousGridworld/44_4_4	slugs_decentralized	shields/general_shield_radius	True	-10	False	ContinuousGridWorld	Pentagon	-10	False	False	Individual_Deep_Q	1.0	norm_simple_mlp	False	0.05	10000000	4	True	ContinuousGridworld/44_4_4_none	none		0.05
ContinuousGridworld/45_4_5	slugs_decentralized	shields/general_shield_radius	True	-10	False	ContinuousGridWorld	Pentagon	-10	False	False	Individual_Deep_Q	1.0	norm_simple_mlp	False	0.05	10000000	5	True	ContinuousGridworld/45_4_5_slugs_centralized	slugs_centralized	shields/general_shield_radius	0.05
ContinuousGridworld/45_4_5	slugs_decentralized	shields/general_shield_radius	True	-10	False	ContinuousGridWorld	Pentagon	-10	False	False	Individual_Deep_Q	1.0	norm_simple_mlp	False	0.05	10000000	5	True	ContinuousGridworld/45_4_5_slugs_decentralized	slugs_decentralized	shields/general_shield_radius	0.05
ContinuousGridworld/45_4_5	slugs_decentralized	shields/general_shield_radius	True	-10	False	ContinuousGridWorld	Pentagon	-10	False	False	Individual_Deep_Q	1.0	norm_simple_mlp	False	0.05	10000000	5	True	ContinuousGridworld/45_4_5_none	none		0.05
ContinuousGridworld/46_4_6	slugs_decentralized	shields/general_shield_radius	True	-10	False	ContinuousGridWorld	Pentagon	-10	False	False	Individual_Deep_Q	1.0	norm_simple_mlp	False	0.05	10000000	6	True	ContinuousGridworld/46_4_6_slugs_centralized	slugs_centralized	shields/general_shield_radius	0.05
ContinuousGridworld/46_4_6	slugs_decentralized	shields/general_shield_radius	True	-10	False	ContinuousGridWorld	Pentagon	-10	False	False	Individual_Deep_Q	1.0	norm_simple_mlp	False	0.05	10000000	6	True	ContinuousGridworld/46_4_6_slugs_decentralized	slugs_decentralized	shields/general_shield_radius	0.05
ContinuousGridworld/46_4_6	slugs_decentralized	shields/general_shield_radius	True	-10	False	ContinuousGridWorld	Pentagon	-10	False	False	Individual_Deep_Q	1.0	norm_simple_mlp	False	0.05	10000000	6	True	ContinuousGridworld/46_4_6_none	none		0.05
ContinuousGridworld/47_4_7	slugs_decentralized	shields/general_shield_radius	True	-10	False	ContinuousGridWorld	Pentagon	-10	False	False	Individual_Deep_Q	1.0	norm_simple_mlp	False	0.05	10000000	7	True	ContinuousGridworld/47_4_7_slugs_centralized	slugs_centralized	shields/general_shield_radius	0.05
ContinuousGridworld/47_4_7	slugs_decentralized	shields/general_shield_radius	True	-10	False	ContinuousGridWorld	Pentagon	-10	False	False	Individual_Deep_Q	1.0	norm_simple_mlp	False	0.05	10000000	7	True	ContinuousGridworld/47_4_7_slugs_decentralized	slugs_decentralized	shields/general_shield_radius	0.05
ContinuousGridworld/47_4_7	slugs_decentralized	shields/general_shield_radius	True	-10	False	ContinuousGridWorld	Pentagon	-10	False	False	Individual_Deep_Q	1.0	norm_simple_mlp	False	0.05	10000000	7	True	ContinuousGridworld/47_4_7_none	none		0.05
ContinuousGridworld/48_4_8	slugs_decentralized	shields/general_shield_radius	True	-10	False	ContinuousGridWorld	Pentagon	-10	False	False	Individual_Deep_Q	1.0	norm_simple_mlp	False	0.05	10000000	8	True	ContinuousGridworld/48_4_8_slugs_centralized	slugs_centralized	shields/general_shield_radius	0.05
ContinuousGridworld/48_4_8	slugs_decentralized	shields/general_shield_radius	True	-10	False	ContinuousGridWorld	Pentagon	-10	False	False	Individual_Deep_Q	1.0	norm_simple_mlp	False	0.05	10000000	8	True	ContinuousGridworld/48_4_8_slugs_decentralized	slugs_decentralized	shields/general_shield_radius	0.05
ContinuousGridworld/48_4_8	slugs_decentralized	shields/general_shield_radius	True	-10	False	ContinuousGridWorld	Pentagon	-10	False	False	Individual_Deep_Q	1.0	norm_simple_mlp	False	0.05	10000000	8	True	ContinuousGridworld/48_4_8_none	none		0.05
ContinuousGridworld/49_4_9	slugs_decentralized	shields/general_shield_radius	True	-10	False	ContinuousGridWorld	Pentagon	-10	False	False	Individual_Deep_Q	1.0	norm_simple_mlp	False	0.05	10000000	9	True	ContinuousGridworld/49_4_9_slugs_centralized	slugs_centralized	shields/general_shield_radius	0.05
ContinuousGridworld/49_4_9	slugs_decentralized	shields/general_shield_radius	True	-10	False	ContinuousGridWorld	Pentagon	-10	False	False	Individual_Deep_Q	1.0	norm_simple_mlp	False	0.05	10000000	9	True	ContinuousGridworld/49_4_9_slugs_decentralized	slugs_decentralized	shields/general_shield_radius	0.05
ContinuousGridworld/49_4_9	slugs_decentralized	shields/general_shield_radius	True	-10	False	ContinuousGridWorld	Pentagon	-10	False	False	Individual_Deep_Q	1.0	norm_simple_mlp	False	0.05	10000000	9	True	ContinuousGridworld/49_4_9_none	none		0.05
ContinuousGridworld/50_5_0	none		True	-10	False	ContinuousGridWorld	Pentagon	-10	False	False	Individual_Deep_Q	1.0	norm_simple_mlp	False	0.05	10000000	0	True	ContinuousGridworld/50_5_0_slugs_centralized	slugs_centralized	shields/general_shield_radius	0.05
ContinuousGridworld/50_5_0	none		True	-10	False	ContinuousGridWorld	Pentagon	-10	False	False	Individual_Deep_Q	1.0	norm_simple_mlp	False	0.05	10000000	0	True	ContinuousGridworld/50_5_0_slugs_decentralized	slugs_decentralized	shields/general_shield_radius	0.05
ContinuousGridworld/50_5_0	none		True	-10	False	ContinuousGridWorld	Pentagon	-10	False	False	Individual_Deep_Q	1.0	norm_simple_mlp	False	0.05	10000000	0	True	ContinuousGridworld/50_5_0_none	none		0.05
ContinuousGridworld/51_5_1	none		True	-10	False	ContinuousGridWorld	Pentagon	-10	False	False	Individual_Deep_Q	1.0	norm_simple_mlp	False	0.05	10000000	1	True	ContinuousGridworld/51_5_1_slugs_centralized	slugs_centralized	shields/general_shield_radius	0.05
ContinuousGridworld/51_5_1	none		True	-10	False	ContinuousGridWorld	Pentagon	-10	False	False	Individual_Deep_Q	1.0	norm_simple_mlp	False	0.05	10000000	1	True	ContinuousGridworld/51_5_1_slugs_decentralized	slugs_decentralized	shields/general_shield_radius	0.05
ContinuousGridworld/51_5_1	none		True	-10	False	ContinuousGridWorld	Pentagon	-10	False	False	Individual_Deep_Q	1.0	norm_simple_mlp	False	0.05	10000000	1	True	ContinuousGridworld/51_5_1_none	none		0.05
ContinuousGridworld/52_5_2	none		True	-10	False	ContinuousGridWorld	Pentagon	-10	False	False	Individual_Deep_Q	1.0	norm_simple_mlp	False	0.05	10000000	2	True	ContinuousGridworld/52_5_2_slugs_centralized	slugs_centralized	shields/general_shield_radius	0.05
ContinuousGridworld/52_5_2	none		True	-10	False	ContinuousGridWorld	Pentagon	-10	False	False	Individual_Deep_Q	1.0	norm_simple_mlp	False	0.05	10000000	2	True	ContinuousGridworld/52_5_2_slugs_decentralized	slugs_decentralized	shields/general_shield_radius	0.05
ContinuousGridworld/52_5_2	none		True	-10	False	ContinuousGridWorld	Pentagon	-10	False	False	Individual_Deep_Q	1.0	norm_simple_mlp	False	0.05	10000000	2	True	ContinuousGridworld/52_5_2_none	none		0.05
ContinuousGridworld/53_5_3	none		True	-10	False	ContinuousGridWorld	Pentagon	-10	False	False	Individual_Deep_Q	1.0	norm_simple_mlp	False	0.05	10000000	3	True	ContinuousGridworld/53_5_3_slugs_centralized	slugs_centralized	shields/general_shield_radius	0.05
ContinuousGridworld/53_5_3	none		True	-10	False	ContinuousGridWorld	Pentagon	-10	False	False	Individual_Deep_Q	1.0	norm_simple_mlp	False	0.05	10000000	3	True	ContinuousGridworld/53_5_3_slugs_decentralized	slugs_decentralized	shields/general_shield_radius	0.05
ContinuousGridworld/53_5_3	none		True	-10	False	ContinuousGridWorld	Pentagon	-10	False	False	Individual_Deep_Q	1.0	norm_simple_mlp	False	0.05	10000000	3	True	ContinuousGridworld/53_5_3_none	none		0.05
ContinuousGridworld/54_5_4	none		True	-10	False	ContinuousGridWorld	Pentagon	-10	False	False	Individual_Deep_Q	1.0	norm_simple_mlp	False	0.05	10000000	4	True	ContinuousGridworld/54_5_4_slugs_centralized	slugs_centralized	shields/general_shield_radius	0.05
ContinuousGridworld/54_5_4	none		True	-10	False	ContinuousGridWorld	Pentagon	-10	False	False	Individual_Deep_Q	1.0	norm_simple_mlp	False	0.05	10000000	4	True	ContinuousGridworld/54_5_4_slugs_decentralized	slugs_decentralized	shields/general_shield_radius	0.05
ContinuousGridworld/54_5_4	none		True	-10	False	ContinuousGridWorld	Pentagon	-10	False	False	Individual_Deep_Q	1.0	norm_simple_mlp	False	0.05	10000000	4	True	ContinuousGridworld/54_5_4_none	none		0.05
ContinuousGridworld/55_5_5	none		True	-10	False	ContinuousGridWorld	Pentagon	-10	False	False	Individual_Deep_Q	1.0	norm_simple_mlp	False	0.05	10000000	5	True	ContinuousGridworld/55_5_5_slugs_centralized	slugs_centralized	shields/general_shield_radius	0.05
ContinuousGridworld/55_5_5	none		True	-10	False	ContinuousGridWorld	Pentagon	-10	False	False	Individual_Deep_Q	1.0	norm_simple_mlp	False	0.05	10000000	5	True	ContinuousGridworld/55_5_5_slugs_decentralized	slugs_decentralized	shields/general_shield_radius	0.05
ContinuousGridworld/55_5_5	none		True	-10	False	ContinuousGridWorld	Pentagon	-10	False	False	Individual_Deep_Q	1.0	norm_simple_mlp	False	0.05	10000000	5	True	ContinuousGridworld/55_5_5_none	none		0.05
ContinuousGridworld/56_5_6	none		True	-10	False	ContinuousGridWorld	Pentagon	-10	False	False	Individual_Deep_Q	1.0	norm_simple_mlp	False	0.05	10000000	6	True	ContinuousGridworld/56_5_6_slugs_centralized	slugs_centralized	shields/general_shield_radius	0.05
ContinuousGridworld/56_5_6	none		True	-10	False	ContinuousGridWorld	Pentagon	-10	False	False	Individual_Deep_Q	1.0	norm_simple_mlp	False	0.05	10000000	6	True	ContinuousGridworld/56_5_6_slugs_decentralized	slugs_decentralized	shields/general_shield_radius	0.05
ContinuousGridworld/56_5_6	none		True	-10	False	ContinuousGridWorld	Pentagon	-10	False	False	Individual_Deep_Q	1.0	norm_simple_mlp	False	0.05	10000000	6	True	ContinuousGridworld/56_5_6_none	none		0.05
ContinuousGridworld/57_5_7	none		True	-10	False	ContinuousGridWorld	Pentagon	-10	False	False	Individual_Deep_Q	1.0	norm_simple_mlp	False	0.05	10000000	7	True	ContinuousGridworld/57_5_7_slugs_centralized	slugs_centralized	shields/general_shield_radius	0.05
ContinuousGridworld/57_5_7	none		True	-10	False	ContinuousGridWorld	Pentagon	-10	False	False	Individual_Deep_Q	1.0	norm_simple_mlp	False	0.05	10000000	7	True	ContinuousGridworld/57_5_7_slugs_decentralized	slugs_decentralized	shields/general_shield_radius	0.05
ContinuousGridworld/57_5_7	none		True	-10	False	ContinuousGridWorld	Pentagon	-10	False	False	Individual_Deep_Q	1.0	norm_simple_mlp	False	0.05	10000000	7	True	ContinuousGridworld/57_5_7_none	none		0.05
ContinuousGridworld/58_5_8	none		True	-10	False	ContinuousGridWorld	Pentagon	-10	False	False	Individual_Deep_Q	1.0	norm_simple_mlp	False	0.05	10000000	8	True	ContinuousGridworld/58_5_8_slugs_centralized	slugs_centralized	shields/general_shield_radius	0.05
ContinuousGridworld/58_5_8	none		True	-10	False	ContinuousGridWorld	Pentagon	-10	False	False	Individual_Deep_Q	1.0	norm_simple_mlp	False	0.05	10000000	8	True	ContinuousGridworld/58_5_8_slugs_decentralized	slugs_decentralized	shields/general_shield_radius	0.05
ContinuousGridworld/58_5_8	none		True	-10	False	ContinuousGridWorld	Pentagon	-10	False	False	Individual_Deep_Q	1.0	norm_simple_mlp	False	0.05	10000000	8	True	ContinuousGridworld/58_5_8_none	none		0.05
ContinuousGridworld/59_5_9	none		True	-10	False	ContinuousGridWorld	Pentagon	-10	False	False	Individual_Deep_Q	1.0	norm_simple_mlp	False	0.05	10000000	9	True	ContinuousGridworld/59_5_9_slugs_centralized	slugs_centralized	shields/general_shield_radius	0.05
ContinuousGridworld/59_5_9	none		True	-10	False	ContinuousGridWorld	Pentagon	-10	False	False	Individual_Deep_Q	1.0	norm_simple_mlp	False	0.05	10000000	9	True	ContinuousGridworld/59_5_9_slugs_decentralized	slugs_decentralized	shields/general_shield_radius	0.05
ContinuousGridworld/59_5_9	none		True	-10	False	ContinuousGridWorld	Pentagon	-10	False	False	Individual_Deep_Q	1.0	norm_simple_mlp	False	0.05	10000000	9	True	ContinuousGridworld/59_5_9_none	none		0.05
ContinuousGridworld/60_6_0	slugs_centralized	shields/general_shield_radius	True	-10	True	ContinuousGridWorld	ISR	-10	False	False	Individual_Deep_Q	1.0	norm_simple_mlp	False	0.05	10000000	0	True	ContinuousGridworld/60_6_0_slugs_centralized	slugs_centralized	shields/general_shield_radius	0.05
ContinuousGridworld/60_6_0	slugs_centralized	shields/general_shield_radius	True	-10	True	ContinuousGridWorld	ISR	-10	False	False	Individual_Deep_Q	1.0	norm_simple_mlp	False	0.05	10000000	0	True	ContinuousGridworld/60_6_0_slugs_decentralized	slugs_decentralized	shields/general_shield_radius	0.05
ContinuousGridworld/60_6_0	slugs_centralized	shields/general_shield_radius	True	-10	True	ContinuousGridWorld	ISR	-10	False	False	Individual_Deep_Q	1.0	norm_simple_mlp	False	0.05	10000000	0	True	ContinuousGridworld/60_6_0_none	none		0.05
ContinuousGridworld/61_6_1	slugs_centralized	shields/general_shield_radius	True	-10	True	ContinuousGridWorld	ISR	-10	False	False	Individual_Deep_Q	1.0	norm_simple_mlp	False	0.05	10000000	1	True	ContinuousGridworld/61_6_1_slugs_centralized	slugs_centralized	shields/general_shield_radius	0.05
ContinuousGridworld/61_6_1	slugs_centralized	shields/general_shield_radius	True	-10	True	ContinuousGridWorld	ISR	-10	False	False	Individual_Deep_Q	1.0	norm_simple_mlp	False	0.05	10000000	1	True	ContinuousGridworld/61_6_1_slugs_decentralized	slugs_decentralized	shields/general_shield_radius	0.05
ContinuousGridworld/61_6_1	slugs_centralized	shields/general_shield_radius	True	-10	True	ContinuousGridWorld	ISR	-10	False	False	Individual_Deep_Q	1.0	norm_simple_mlp	False	0.05	10000000	1	True	ContinuousGridworld/61_6_1_none	none		0.05
ContinuousGridworld/62_6_2	slugs_centralized	shields/general_shield_radius	True	-10	True	ContinuousGridWorld	ISR	-10	False	False	Individual_Deep_Q	1.0	norm_simple_mlp	False	0.05	10000000	2	True	ContinuousGridworld/62_6_2_slugs_centralized	slugs_centralized	shields/general_shield_radius	0.05
ContinuousGridworld/62_6_2	slugs_centralized	shields/general_shield_radius	True	-10	True	ContinuousGridWorld	ISR	-10	False	False	Individual_Deep_Q	1.0	norm_simple_mlp	False	0.05	10000000	2	True	ContinuousGridworld/62_6_2_slugs_decentralized	slugs_decentralized	shields/general_shield_radius	0.05
ContinuousGridworld/62_6_2	slugs_centralized	shields/general_shield_radius	True	-10	True	ContinuousGridWorld	ISR	-10	False	False	Individual_Deep_Q	1.0	norm_simple_mlp	False	0.05	10000000	2	True	ContinuousGridworld/62_6_2_none	none		0.05
ContinuousGridworld/63_6_3	slugs_centralized	shields/general_shield_radius	True	-10	True	ContinuousGridWorld	ISR	-10	False	False	Individual_Deep_Q	1.0	norm_simple_mlp	False	0.05	10000000	3	True	ContinuousGridworld/63_6_3_slugs_centralized	slugs_centralized	shields/general_shield_radius	0.05
ContinuousGridworld/63_6_3	slugs_centralized	shields/general_shield_radius	True	-10	True	ContinuousGridWorld	ISR	-10	False	False	Individual_Deep_Q	1.0	norm_simple_mlp	False	0.05	10000000	3	True	ContinuousGridworld/63_6_3_slugs_decentralized	slugs_decentralized	shields/general_shield_radius	0.05
ContinuousGridworld/63_6_3	slugs_centralized	shields/general_shield_radius	True	-10	True	ContinuousGridWorld	ISR	-10	False	False	Individual_Deep_Q	1.0	norm_simple_mlp	False	0.05	10000000	3	True	ContinuousGridworld/63_6_3_none	none		0.05
ContinuousGridworld/64_6_4	slugs_centralized	shields/general_shield_radius	True	-10	True	ContinuousGridWorld	ISR	-10	False	False	Individual_Deep_Q	1.0	norm_simple_mlp	False	0.05	10000000	4	True	ContinuousGridworld/64_6_4_slugs_centralized	slugs_centralized	shields/general_shield_radius	0.05
ContinuousGridworld/64_6_4	slugs_centralized	shields/general_shield_radius	True	-10	True	ContinuousGridWorld	ISR	-10	False	False	Individual_Deep_Q	1.0	norm_simple_mlp	False	0.05	10000000	4	True	ContinuousGridworld/64_6_4_slugs_decentralized	slugs_decentralized	shields/general_shield_radius	0.05
ContinuousGridworld/64_6_4	slugs_centralized	shields/general_shield_radius	True	-10	True	ContinuousGridWorld	ISR	-10	False	False	Individual_Deep_Q	1.0	norm_simple_mlp	False	0.05	10000000	4	True	ContinuousGridworld/64_6_4_none	none		0.05
ContinuousGridworld/65_6_5	slugs_centralized	shields/general_shield_radius	True	-10	True	ContinuousGridWorld	ISR	-10	False	False	Individual_Deep_Q	1.0	norm_simple_mlp	False	0.05	10000000	5	True	ContinuousGridworld/65_6_5_slugs_centralized	slugs_centralized	shields/general_shield_radius	0.05
ContinuousGridworld/65_6_5	slugs_centralized	shields/general_shield_radius	True	-10	True	ContinuousGridWorld	ISR	-10	False	False	Individual_Deep_Q	1.0	norm_simple_mlp	False	0.05	10000000	5	True	ContinuousGridworld/65_6_5_slugs_decentralized	slugs_decentralized	shields/general_shield_radius	0.05
ContinuousGridworld/65_6_5	slugs_centralized	shields/general_shield_radius	True	-10	True	ContinuousGridWorld	ISR	-10	False	False	Individual_Deep_Q	1.0	norm_simple_mlp	False	0.05	10000000	5	True	ContinuousGridworld/65_6_5_none	none		0.05
ContinuousGridworld/66_6_6	slugs_centralized	shields/general_shield_radius	True	-10	True	ContinuousGridWorld	ISR	-10	False	False	Individual_Deep_Q	1.0	norm_simple_mlp	False	0.05	10000000	6	True	ContinuousGridworld/66_6_6_slugs_centralized	slugs_centralized	shields/general_shield_radius	0.05
ContinuousGridworld/66_6_6	slugs_centralized	shields/general_shield_radius	True	-10	True	ContinuousGridWorld	ISR	-10	False	False	Individual_Deep_Q	1.0	norm_simple_mlp	False	0.05	10000000	6	True	ContinuousGridworld/66_6_6_slugs_decentralized	slugs_decentralized	shields/general_shield_radius	0.05
ContinuousGridworld/66_6_6	slugs_centralized	shields/general_shield_radius	True	-10	True	ContinuousGridWorld	ISR	-10	False	False	Individual_Deep_Q	1.0	norm_simple_mlp	False	0.05	10000000	6	True	ContinuousGridworld/66_6_6_none	none		0.05
ContinuousGridworld/67_6_7	slugs_centralized	shields/general_shield_radius	True	-10	True	ContinuousGridWorld	ISR	-10	False	False	Individual_Deep_Q	1.0	norm_simple_mlp	False	0.05	10000000	7	True	ContinuousGridworld/67_6_7_slugs_centralized	slugs_centralized	shields/general_shield_radius	0.05
ContinuousGridworld/67_6_7	slugs_centralized	shields/general_shield_radius	True	-10	True	ContinuousGridWorld	ISR	-10	False	False	Individual_Deep_Q	1.0	norm_simple_mlp	False	0.05	10000000	7	True	ContinuousGridworld/67_6_7_slugs_decentralized	slugs_decentralized	shields/general_shield_radius	0.05
ContinuousGridworld/67_6_7	slugs_centralized	shields/general_shield_radius	True	-10	True	ContinuousGridWorld	ISR	-10	False	False	Individual_Deep_Q	1.0	norm_simple_mlp	False	0.05	10000000	7	True	ContinuousGridworld/67_6_7_none	none		0.05
ContinuousGridworld/68_6_8	slugs_centralized	shields/general_shield_radius	True	-10	True	ContinuousGridWorld	ISR	-10	False	False	Individual_Deep_Q	1.0	norm_simple_mlp	False	0.05	10000000	8	True	ContinuousGridworld/68_6_8_slugs_centralized	slugs_centralized	shields/general_shield_radius	0.05
ContinuousGridworld/68_6_8	slugs_centralized	shields/general_shield_radius	True	-10	True	ContinuousGridWorld	ISR	-10	False	False	Individual_Deep_Q	1.0	norm_simple_mlp	False	0.05	10000000	8	True	ContinuousGridworld/68_6_8_slugs_decentralized	slugs_decentralized	shields/general_shield_radius	0.05
ContinuousGridworld/68_6_8	slugs_centralized	shields/general_shield_radius	True	-10	True	ContinuousGridWorld	ISR	-10	False	False	Individual_Deep_Q	1.0	norm_simple_mlp	False	0.05	10000000	8	True	ContinuousGridworld/68_6_8_none	none		0.05
ContinuousGridworld/69_6_9	slugs_centralized	shields/general_shield_radius	True	-10	True	ContinuousGridWorld	ISR	-10	False	False	Individual_Deep_Q	1.0	norm_simple_mlp	False	0.05	10000000	9	True	ContinuousGridworld/69_6_9_slugs_centralized	slugs_centralized	shields/general_shield_radius	0.05
ContinuousGridworld/69_6_9	slugs_centralized	shields/general_shield_radius	True	-10	True	ContinuousGridWorld	ISR	-10	False	False	Individual_Deep_Q	1.0	norm_simple_mlp	False	0.05	10000000	9	True	ContinuousGridworld/69_6_9_slugs_decentralized	slugs_decentralized	shields/general_shield_radius	0.05
ContinuousGridworld/69_6_9	slugs_centralized	shields/general_shield_radius	True	-10	True	ContinuousGridWorld	ISR	-10	False	False	Individual_Deep_Q	1.0	norm_simple_mlp	False	0.05	10000000	9	True	ContinuousGridworld/69_6_9_none	none		0.05
ContinuousGridworld/70_7_0	slugs_decentralized	shields/general_shield_radius	True	-10	True	ContinuousGridWorld	ISR	-10	False	False	Individual_Deep_Q	1.0	norm_simple_mlp	False	0.05	10000000	0	True	ContinuousGridworld/70_7_0_slugs_centralized	slugs_centralized	shields/general_shield_radius	0.05
ContinuousGridworld/70_7_0	slugs_decentralized	shields/general_shield_radius	True	-10	True	ContinuousGridWorld	ISR	-10	False	False	Individual_Deep_Q	1.0	norm_simple_mlp	False	0.05	10000000	0	True	ContinuousGridworld/70_7_0_slugs_decentralized	slugs_decentralized	shields/general_shield_radius	0.05
ContinuousGridworld/70_7_0	slugs_decentralized	shields/general_shield_radius	True	-10	True	ContinuousGridWorld	ISR	-10	False	False	Individual_Deep_Q	1.0	norm_simple_mlp	False	0.05	10000000	0	True	ContinuousGridworld/70_7_0_none	none		0.05
ContinuousGridworld/71_7_1	slugs_decentralized	shields/general_shield_radius	True	-10	True	ContinuousGridWorld	ISR	-10	False	False	Individual_Deep_Q	1.0	norm_simple_mlp	False	0.05	10000000	1	True	ContinuousGridworld/71_7_1_slugs_centralized	slugs_centralized	shields/general_shield_radius	0.05
ContinuousGridworld/71_7_1	slugs_decentralized	shields/general_shield_radius	True	-10	True	ContinuousGridWorld	ISR	-10	False	False	Individual_Deep_Q	1.0	norm_simple_mlp	False	0.05	10000000	1	True	ContinuousGridworld/71_7_1_slugs_decentralized	slugs_decentralized	shields/general_shield_radius	0.05
ContinuousGridworld/71_7_1	slugs_decentralized	shields/general_shield_radius	True	-10	True	ContinuousGridWorld	ISR	-10	False	False	Individual_Deep_Q	1.0	norm_simple_mlp	False	0.05	10000000	1	True	ContinuousGridworld/71_7_1_none	none		0.05
ContinuousGridworld/72_7_2	slugs_decentralized	shields/general_shield_radius	True	-10	True	ContinuousGridWorld	ISR	-10	False	False	Individual_Deep_Q	1.0	norm_simple_mlp	False	0.05	10000000	2	True	ContinuousGridworld/72_7_2_slugs_centralized	slugs_centralized	shields/general_shield_radius	0.05
ContinuousGridworld/72_7_2	slugs_decentralized	shields/general_shield_radius	True	-10	True	ContinuousGridWorld	ISR	-10	False	False	Individual_Deep_Q	1.0	norm_simple_mlp	False	0.05	10000000	2	True	ContinuousGridworld/72_7_2_slugs_decentralized	slugs_decentralized	shields/general_shield_radius	0.05
ContinuousGridworld/72_7_2	slugs_decentralized	shields/general_shield_radius	True	-10	True	ContinuousGridWorld	ISR	-10	False	False	Individual_Deep_Q	1.0	norm_simple_mlp	False	0.05	10000000	2	True	ContinuousGridworld/72_7_2_none	none		0.05
ContinuousGridworld/73_7_3	slugs_decentralized	shields/general_shield_radius	True	-10	True	ContinuousGridWorld	ISR	-10	False	False	Individual_Deep_Q	1.0	norm_simple_mlp	False	0.05	10000000	3	True	ContinuousGridworld/73_7_3_slugs_centralized	slugs_centralized	shields/general_shield_radius	0.05
ContinuousGridworld/73_7_3	slugs_decentralized	shields/general_shield_radius	True	-10	True	ContinuousGridWorld	ISR	-10	False	False	Individual_Deep_Q	1.0	norm_simple_mlp	False	0.05	10000000	3	True	ContinuousGridworld/73_7_3_slugs_decentralized	slugs_decentralized	shields/general_shield_radius	0.05
ContinuousGridworld/73_7_3	slugs_decentralized	shields/general_shield_radius	True	-10	True	ContinuousGridWorld	ISR	-10	False	False	Individual_Deep_Q	1.0	norm_simple_mlp	False	0.05	10000000	3	True	ContinuousGridworld/73_7_3_none	none		0.05
ContinuousGridworld/74_7_4	slugs_decentralized	shields/general_shield_radius	True	-10	True	ContinuousGridWorld	ISR	-10	False	False	Individual_Deep_Q	1.0	norm_simple_mlp	False	0.05	10000000	4	True	ContinuousGridworld/74_7_4_slugs_centralized	slugs_centralized	shields/general_shield_radius	0.05
ContinuousGridworld/74_7_4	slugs_decentralized	shields/general_shield_radius	True	-10	True	ContinuousGridWorld	ISR	-10	False	False	Individual_Deep_Q	1.0	norm_simple_mlp	False	0.05	10000000	4	True	ContinuousGridworld/74_7_4_slugs_decentralized	slugs_decentralized	shields/general_shield_radius	0.05
ContinuousGridworld/74_7_4	slugs_decentralized	shields/general_shield_radius	True	-10	True	ContinuousGridWorld	ISR	-10	False	False	Individual_Deep_Q	1.0	norm_simple_mlp	False	0.05	10000000	4	True	ContinuousGridworld/74_7_4_none	none		0.05
ContinuousGridworld/75_7_5	slugs_decentralized	shields/general_shield_radius	True	-10	True	ContinuousGridWorld	ISR	-10	False	False	Individual_Deep_Q	1.0	norm_simple_mlp	False	0.05	10000000	5	True	ContinuousGridworld/75_7_5_slugs_centralized	slugs_centralized	shields/general_shield_radius	0.05
ContinuousGridworld/75_7_5	slugs_decentralized	shields/general_shield_radius	True	-10	True	ContinuousGridWorld	ISR	-10	False	False	Individual_Deep_Q	1.0	norm_simple_mlp	False	0.05	10000000	5	True	ContinuousGridworld/75_7_5_slugs_decentralized	slugs_decentralized	shields/general_shield_radius	0.05
ContinuousGridworld/75_7_5	slugs_decentralized	shields/general_shield_radius	True	-10	True	ContinuousGridWorld	ISR	-10	False	False	Individual_Deep_Q	1.0	norm_simple_mlp	False	0.05	10000000	5	True	ContinuousGridworld/75_7_5_none	none		0.05
ContinuousGridworld/76_7_6	slugs_decentralized	shields/general_shield_radius	True	-10	True	ContinuousGridWorld	ISR	-10	False	False	Individual_Deep_Q	1.0	norm_simple_mlp	False	0.05	10000000	6	True	ContinuousGridworld/76_7_6_slugs_centralized	slugs_centralized	shields/general_shield_radius	0.05
ContinuousGridworld/76_7_6	slugs_decentralized	shields/general_shield_radius	True	-10	True	ContinuousGridWorld	ISR	-10	False	False	Individual_Deep_Q	1.0	norm_simple_mlp	False	0.05	10000000	6	True	ContinuousGridworld/76_7_6_slugs_decentralized	slugs_decentralized	shields/general_shield_radius	0.05
ContinuousGridworld/76_7_6	slugs_decentralized	shields/general_shield_radius	True	-10	True	ContinuousGridWorld	ISR	-10	False	False	Individual_Deep_Q	1.0	norm_simple_mlp	False	0.05	10000000	6	True	ContinuousGridworld/76_7_6_none	none		0.05
ContinuousGridworld/77_7_7	slugs_decentralized	shields/general_shield_radius	True	-10	True	ContinuousGridWorld	ISR	-10	False	False	Individual_Deep_Q	1.0	norm_simple_mlp	False	0.05	10000000	7	True	ContinuousGridworld/77_7_7_slugs_centralized	slugs_centralized	shields/general_shield_radius	0.05
ContinuousGridworld/77_7_7	slugs_decentralized	shields/general_shield_radius	True	-10	True	ContinuousGridWorld	ISR	-10	False	False	Individual_Deep_Q	1.0	norm_simple_mlp	False	0.05	10000000	7	True	ContinuousGridworld/77_7_7_slugs_decentralized	slugs_decentralized	shields/general_shield_radius	0.05
ContinuousGridworld/77_7_7	slugs_decentralized	shields/general_shield_radius	True	-10	True	ContinuousGridWorld	ISR	-10	False	False	Individual_Deep_Q	1.0	norm_simple_mlp	False	0.05	10000000	7	True	ContinuousGridworld/77_7_7_none	none		0.05
ContinuousGridworld/78_7_8	slugs_decentralized	shields/general_shield_radius	True	-10	True	ContinuousGridWorld	ISR	-10	False	False	Individual_Deep_Q	1.0	norm_simple_mlp	False	0.05	10000000	8	True	ContinuousGridworld/78_7_8_slugs_centralized	slugs_centralized	shields/general_shield_radius	0.05
ContinuousGridworld/78_7_8	slugs_decentralized	shields/general_shield_radius	True	-10	True	ContinuousGridWorld	ISR	-10	False	False	Individual_Deep_Q	1.0	norm_simple_mlp	False	0.05	10000000	8	True	ContinuousGridworld/78_7_8_slugs_decentralized	slugs_decentralized	shields/general_shield_radius	0.05
ContinuousGridworld/78_7_8	slugs_decentralized	shields/general_shield_radius	True	-10	True	ContinuousGridWorld	ISR	-10	False	False	Individual_Deep_Q	1.0	norm_simple_mlp	False	0.05	10000000	8	True	ContinuousGridworld/78_7_8_none	none		0.05
ContinuousGridworld/79_7_9	slugs_decentralized	shields/general_shield_radius	True	-10	True	ContinuousGridWorld	ISR	-10	False	False	Individual_Deep_Q	1.0	norm_simple_mlp	False	0.05	10000000	9	True	ContinuousGridworld/79_7_9_slugs_centralized	slugs_centralized	shields/general_shield_radius	0.05
ContinuousGridworld/79_7_9	slugs_decentralized	shields/general_shield_radius	True	-10	True	ContinuousGridWorld	ISR	-10	False	False	Individual_Deep_Q	1.0	norm_simple_mlp	False	0.05	10000000	9	True	ContinuousGridworld/79_7_9_slugs_decentralized	slugs_decentralized	shields/general_shield_radius	0.05
ContinuousGridworld/79_7_9	slugs_decentralized	shields/general_shield_radius	True	-10	True	ContinuousGridWorld	ISR	-10	False	False	Individual_Deep_Q	1.0	norm_simple_mlp	False	0.05	10000000	9	True	ContinuousGridworld/79_7_9_none	none		0.05
ContinuousGridworld/80_8_0	none		True	-10	True	ContinuousGridWorld	ISR	-10	False	False	Individual_Deep_Q	1.0	norm_simple_mlp	False	0.05	10000000	0	True	ContinuousGridworld/80_8_0_slugs_centralized	slugs_centralized	shields/general_shield_radius	0.05
ContinuousGridworld/80_8_0	none		True	-10	True	ContinuousGridWorld	ISR	-10	False	False	Individual_Deep_Q	1.0	norm_simple_mlp	False	0.05	10000000	0	True	ContinuousGridworld/80_8_0_slugs_decentralized	slugs_decentralized	shields/general_shield_radius	0.05
ContinuousGridworld/80_8_0	none		True	-10	True	ContinuousGridWorld	ISR	-10	False	False	Individual_Deep_Q	1.0	norm_simple_mlp	False	0.05	10000000	0	True	ContinuousGridworld/80_8_0_none	none		0.05
ContinuousGridworld/81_8_1	none		True	-10	True	ContinuousGridWorld	ISR	-10	False	False	Individual_Deep_Q	1.0	norm_simple_mlp	False	0.05	10000000	1	True	ContinuousGridworld/81_8_1_slugs_centralized	slugs_centralized	shields/general_shield_radius	0.05
ContinuousGridworld/81_8_1	none		True	-10	True	ContinuousGridWorld	ISR	-10	False	False	Individual_Deep_Q	1.0	norm_simple_mlp	False	0.05	10000000	1	True	ContinuousGridworld/81_8_1_slugs_decentralized	slugs_decentralized	shields/general_shield_radius	0.05
ContinuousGridworld/81_8_1	none		True	-10	True	ContinuousGridWorld	ISR	-10	False	False	Individual_Deep_Q	1.0	norm_simple_mlp	False	0.05	10000000	1	True	ContinuousGridworld/81_8_1_none	none		0.05
ContinuousGridworld/82_8_2	none		True	-10	True	ContinuousGridWorld	ISR	-10	False	False	Individual_Deep_Q	1.0	norm_simple_mlp	False	0.05	10000000	2	True	ContinuousGridworld/82_8_2_slugs_centralized	slugs_centralized	shields/general_shield_radius	0.05
ContinuousGridworld/82_8_2	none		True	-10	True	ContinuousGridWorld	ISR	-10	False	False	Individual_Deep_Q	1.0	norm_simple_mlp	False	0.05	10000000	2	True	ContinuousGridworld/82_8_2_slugs_decentralized	slugs_decentralized	shields/general_shield_radius	0.05
ContinuousGridworld/82_8_2	none		True	-10	True	ContinuousGridWorld	ISR	-10	False	False	Individual_Deep_Q	1.0	norm_simple_mlp	False	0.05	10000000	2	True	ContinuousGridworld/82_8_2_none	none		0.05
ContinuousGridworld/83_8_3	none		True	-10	True	ContinuousGridWorld	ISR	-10	False	False	Individual_Deep_Q	1.0	norm_simple_mlp	False	0.05	10000000	3	True	ContinuousGridworld/83_8_3_slugs_centralized	slugs_centralized	shields/general_shield_radius	0.05
ContinuousGridworld/83_8_3	none		True	-10	True	ContinuousGridWorld	ISR	-10	False	False	Individual_Deep_Q	1.0	norm_simple_mlp	False	0.05	10000000	3	True	ContinuousGridworld/83_8_3_slugs_decentralized	slugs_decentralized	shields/general_shield_radius	0.05
ContinuousGridworld/83_8_3	none		True	-10	True	ContinuousGridWorld	ISR	-10	False	False	Individual_Deep_Q	1.0	norm_simple_mlp	False	0.05	10000000	3	True	ContinuousGridworld/83_8_3_none	none		0.05
ContinuousGridworld/84_8_4	none		True	-10	True	ContinuousGridWorld	ISR	-10	False	False	Individual_Deep_Q	1.0	norm_simple_mlp	False	0.05	10000000	4	True	ContinuousGridworld/84_8_4_slugs_centralized	slugs_centralized	shields/general_shield_radius	0.05
ContinuousGridworld/84_8_4	none		True	-10	True	ContinuousGridWorld	ISR	-10	False	False	Individual_Deep_Q	1.0	norm_simple_mlp	False	0.05	10000000	4	True	ContinuousGridworld/84_8_4_slugs_decentralized	slugs_decentralized	shields/general_shield_radius	0.05
ContinuousGridworld/84_8_4	none		True	-10	True	ContinuousGridWorld	ISR	-10	False	False	Individual_Deep_Q	1.0	norm_simple_mlp	False	0.05	10000000	4	True	ContinuousGridworld/84_8_4_none	none		0.05
ContinuousGridworld/85_8_5	none		True	-10	True	ContinuousGridWorld	ISR	-10	False	False	Individual_Deep_Q	1.0	norm_simple_mlp	False	0.05	10000000	5	True	ContinuousGridworld/85_8_5_slugs_centralized	slugs_centralized	shields/general_shield_radius	0.05
ContinuousGridworld/85_8_5	none		True	-10	True	ContinuousGridWorld	ISR	-10	False	False	Individual_Deep_Q	1.0	norm_simple_mlp	False	0.05	10000000	5	True	ContinuousGridworld/85_8_5_slugs_decentralized	slugs_decentralized	shields/general_shield_radius	0.05
ContinuousGridworld/85_8_5	none		True	-10	True	ContinuousGridWorld	ISR	-10	False	False	Individual_Deep_Q	1.0	norm_simple_mlp	False	0.05	10000000	5	True	ContinuousGridworld/85_8_5_none	none		0.05
ContinuousGridworld/86_8_6	none		True	-10	True	ContinuousGridWorld	ISR	-10	False	False	Individual_Deep_Q	1.0	norm_simple_mlp	False	0.05	10000000	6	True	ContinuousGridworld/86_8_6_slugs_centralized	slugs_centralized	shields/general_shield_radius	0.05
ContinuousGridworld/86_8_6	none		True	-10	True	ContinuousGridWorld	ISR	-10	False	False	Individual_Deep_Q	1.0	norm_simple_mlp	False	0.05	10000000	6	True	ContinuousGridworld/86_8_6_slugs_decentralized	slugs_decentralized	shields/general_shield_radius	0.05
ContinuousGridworld/86_8_6	none		True	-10	True	ContinuousGridWorld	ISR	-10	False	False	Individual_Deep_Q	1.0	norm_simple_mlp	False	0.05	10000000	6	True	ContinuousGridworld/86_8_6_none	none		0.05
ContinuousGridworld/87_8_7	none		True	-10	True	ContinuousGridWorld	ISR	-10	False	False	Individual_Deep_Q	1.0	norm_simple_mlp	False	0.05	10000000	7	True	ContinuousGridworld/87_8_7_slugs_centralized	slugs_centralized	shields/general_shield_radius	0.05
ContinuousGridworld/87_8_7	none		True	-10	True	ContinuousGridWorld	ISR	-10	False	False	Individual_Deep_Q	1.0	norm_simple_mlp	False	0.05	10000000	7	True	ContinuousGridworld/87_8_7_slugs_decentralized	slugs_decentralized	shields/general_shield_radius	0.05
ContinuousGridworld/87_8_7	none		True	-10	True	ContinuousGridWorld	ISR	-10	False	False	Individual_Deep_Q	1.0	norm_simple_mlp	False	0.05	10000000	7	True	ContinuousGridworld/87_8_7_none	none		0.05
ContinuousGridworld/88_8_8	none		True	-10	True	ContinuousGridWorld	ISR	-10	False	False	Individual_Deep_Q	1.0	norm_simple_mlp	False	0.05	10000000	8	True	ContinuousGridworld/88_8_8_slugs_centralized	slugs_centralized	shields/general_shield_radius	0.05
ContinuousGridworld/88_8_8	none		True	-10	True	ContinuousGridWorld	ISR	-10	False	False	Individual_Deep_Q	1.0	norm_simple_mlp	False	0.05	10000000	8	True	ContinuousGridworld/88_8_8_slugs_decentralized	slugs_decentralized	shields/general_shield_radius	0.05
ContinuousGridworld/88_8_8	none		True	-10	True	ContinuousGridWorld	ISR	-10	False	False	Individual_Deep_Q	1.0	norm_simple_mlp	False	0.05	10000000	8	True	ContinuousGridworld/88_8_8_none	none		0.05
ContinuousGridworld/89_8_9	none		True	-10	True	ContinuousGridWorld	ISR	-10	False	False	Individual_Deep_Q	1.0	norm_simple_mlp	False	0.05	10000000	9	True	ContinuousGridworld/89_8_9_slugs_centralized	slugs_centralized	shields/general_shield_radius	0.05
ContinuousGridworld/89_8_9	none		True	-10	True	ContinuousGridWorld	ISR	-10	False	False	Individual_Deep_Q	1.0	norm_simple_mlp	False	0.05	10000000	9	True	ContinuousGridworld/89_8_9_slugs_decentralized	slugs_decentralized	shields/general_shield_radius	0.05
ContinuousGridworld/89_8_9	none		True	-10	True	ContinuousGridWorld	ISR	-10	False	False	Individual_Deep_Q	1.0	norm_simple_mlp	False	0.05	10000000	9	True	ContinuousGridworld/89_8_9_none	none		0.05
ContinuousGridworld/90_9_0	slugs_centralized	shields/general_shield_radius	True	-10	False	ContinuousGridWorld	ISR	-10	False	False	Individual_Deep_Q	1.0	norm_simple_mlp	False	0.05	10000000	0	True	ContinuousGridworld/90_9_0_slugs_centralized	slugs_centralized	shields/general_shield_radius	0.05
ContinuousGridworld/90_9_0	slugs_centralized	shields/general_shield_radius	True	-10	False	ContinuousGridWorld	ISR	-10	False	False	Individual_Deep_Q	1.0	norm_simple_mlp	False	0.05	10000000	0	True	ContinuousGridworld/90_9_0_slugs_decentralized	slugs_decentralized	shields/general_shield_radius	0.05
ContinuousGridworld/90_9_0	slugs_centralized	shields/general_shield_radius	True	-10	False	ContinuousGridWorld	ISR	-10	False	False	Individual_Deep_Q	1.0	norm_simple_mlp	False	0.05	10000000	0	True	ContinuousGridworld/90_9_0_none	none		0.05
ContinuousGridworld/91_9_1	slugs_centralized	shields/general_shield_radius	True	-10	False	ContinuousGridWorld	ISR	-10	False	False	Individual_Deep_Q	1.0	norm_simple_mlp	False	0.05	10000000	1	True	ContinuousGridworld/91_9_1_slugs_centralized	slugs_centralized	shields/general_shield_radius	0.05
ContinuousGridworld/91_9_1	slugs_centralized	shields/general_shield_radius	True	-10	False	ContinuousGridWorld	ISR	-10	False	False	Individual_Deep_Q	1.0	norm_simple_mlp	False	0.05	10000000	1	True	ContinuousGridworld/91_9_1_slugs_decentralized	slugs_decentralized	shields/general_shield_radius	0.05
ContinuousGridworld/91_9_1	slugs_centralized	shields/general_shield_radius	True	-10	False	ContinuousGridWorld	ISR	-10	False	False	Individual_Deep_Q	1.0	norm_simple_mlp	False	0.05	10000000	1	True	ContinuousGridworld/91_9_1_none	none		0.05
ContinuousGridworld/92_9_2	slugs_centralized	shields/general_shield_radius	True	-10	False	ContinuousGridWorld	ISR	-10	False	False	Individual_Deep_Q	1.0	norm_simple_mlp	False	0.05	10000000	2	True	ContinuousGridworld/92_9_2_slugs_centralized	slugs_centralized	shields/general_shield_radius	0.05
ContinuousGridworld/92_9_2	slugs_centralized	shields/general_shield_radius	True	-10	False	ContinuousGridWorld	ISR	-10	False	False	Individual_Deep_Q	1.0	norm_simple_mlp	False	0.05	10000000	2	True	ContinuousGridworld/92_9_2_slugs_decentralized	slugs_decentralized	shields/general_shield_radius	0.05
ContinuousGridworld/92_9_2	slugs_centralized	shields/general_shield_radius	True	-10	False	ContinuousGridWorld	ISR	-10	False	False	Individual_Deep_Q	1.0	norm_simple_mlp	False	0.05	10000000	2	True	ContinuousGridworld/92_9_2_none	none		0.05
ContinuousGridworld/93_9_3	slugs_centralized	shields/general_shield_radius	True	-10	False	ContinuousGridWorld	ISR	-10	False	False	Individual_Deep_Q	1.0	norm_simple_mlp	False	0.05	10000000	3	True	ContinuousGridworld/93_9_3_slugs_centralized	slugs_centralized	shields/general_shield_radius	0.05
ContinuousGridworld/93_9_3	slugs_centralized	shields/general_shield_radius	True	-10	False	ContinuousGridWorld	ISR	-10	False	False	Individual_Deep_Q	1.0	norm_simple_mlp	False	0.05	10000000	3	True	ContinuousGridworld/93_9_3_slugs_decentralized	slugs_decentralized	shields/general_shield_radius	0.05
ContinuousGridworld/93_9_3	slugs_centralized	shields/general_shield_radius	True	-10	False	ContinuousGridWorld	ISR	-10	False	False	Individual_Deep_Q	1.0	norm_simple_mlp	False	0.05	10000000	3	True	ContinuousGridworld/93_9_3_none	none		0.05
ContinuousGridworld/94_9_4	slugs_centralized	shields/general_shield_radius	True	-10	False	ContinuousGridWorld	ISR	-10	False	False	Individual_Deep_Q	1.0	norm_simple_mlp	False	0.05	10000000	4	True	ContinuousGridworld/94_9_4_slugs_centralized	slugs_centralized	shields/general_shield_radius	0.05
ContinuousGridworld/94_9_4	slugs_centralized	shields/general_shield_radius	True	-10	False	ContinuousGridWorld	ISR	-10	False	False	Individual_Deep_Q	1.0	norm_simple_mlp	False	0.05	10000000	4	True	ContinuousGridworld/94_9_4_slugs_decentralized	slugs_decentralized	shields/general_shield_radius	0.05
ContinuousGridworld/94_9_4	slugs_centralized	shields/general_shield_radius	True	-10	False	ContinuousGridWorld	ISR	-10	False	False	Individual_Deep_Q	1.0	norm_simple_mlp	False	0.05	10000000	4	True	ContinuousGridworld/94_9_4_none	none		0.05
ContinuousGridworld/95_9_5	slugs_centralized	shields/general_shield_radius	True	-10	False	ContinuousGridWorld	ISR	-10	False	False	Individual_Deep_Q	1.0	norm_simple_mlp	False	0.05	10000000	5	True	ContinuousGridworld/95_9_5_slugs_centralized	slugs_centralized	shields/general_shield_radius	0.05
ContinuousGridworld/95_9_5	slugs_centralized	shields/general_shield_radius	True	-10	False	ContinuousGridWorld	ISR	-10	False	False	Individual_Deep_Q	1.0	norm_simple_mlp	False	0.05	10000000	5	True	ContinuousGridworld/95_9_5_slugs_decentralized	slugs_decentralized	shields/general_shield_radius	0.05
ContinuousGridworld/95_9_5	slugs_centralized	shields/general_shield_radius	True	-10	False	ContinuousGridWorld	ISR	-10	False	False	Individual_Deep_Q	1.0	norm_simple_mlp	False	0.05	10000000	5	True	ContinuousGridworld/95_9_5_none	none		0.05
ContinuousGridworld/96_9_6	slugs_centralized	shields/general_shield_radius	True	-10	False	ContinuousGridWorld	ISR	-10	False	False	Individual_Deep_Q	1.0	norm_simple_mlp	False	0.05	10000000	6	True	ContinuousGridworld/96_9_6_slugs_centralized	slugs_centralized	shields/general_shield_radius	0.05
ContinuousGridworld/96_9_6	slugs_centralized	shields/general_shield_radius	True	-10	False	ContinuousGridWorld	ISR	-10	False	False	Individual_Deep_Q	1.0	norm_simple_mlp	False	0.05	10000000	6	True	ContinuousGridworld/96_9_6_slugs_decentralized	slugs_decentralized	shields/general_shield_radius	0.05
ContinuousGridworld/96_9_6	slugs_centralized	shields/general_shield_radius	True	-10	False	ContinuousGridWorld	ISR	-10	False	False	Individual_Deep_Q	1.0	norm_simple_mlp	False	0.05	10000000	6	True	ContinuousGridworld/96_9_6_none	none		0.05
ContinuousGridworld/97_9_7	slugs_centralized	shields/general_shield_radius	True	-10	False	ContinuousGridWorld	ISR	-10	False	False	Individual_Deep_Q	1.0	norm_simple_mlp	False	0.05	10000000	7	True	ContinuousGridworld/97_9_7_slugs_centralized	slugs_centralized	shields/general_shield_radius	0.05
ContinuousGridworld/97_9_7	slugs_centralized	shields/general_shield_radius	True	-10	False	ContinuousGridWorld	ISR	-10	False	False	Individual_Deep_Q	1.0	norm_simple_mlp	False	0.05	10000000	7	True	ContinuousGridworld/97_9_7_slugs_decentralized	slugs_decentralized	shields/general_shield_radius	0.05
ContinuousGridworld/97_9_7	slugs_centralized	shields/general_shield_radius	True	-10	False	ContinuousGridWorld	ISR	-10	False	False	Individual_Deep_Q	1.0	norm_simple_mlp	False	0.05	10000000	7	True	ContinuousGridworld/97_9_7_none	none		0.05
ContinuousGridworld/98_9_8	slugs_centralized	shields/general_shield_radius	True	-10	False	ContinuousGridWorld	ISR	-10	False	False	Individual_Deep_Q	1.0	norm_simple_mlp	False	0.05	10000000	8	True	ContinuousGridworld/98_9_8_slugs_centralized	slugs_centralized	shields/general_shield_radius	0.05
ContinuousGridworld/98_9_8	slugs_centralized	shields/general_shield_radius	True	-10	False	ContinuousGridWorld	ISR	-10	False	False	Individual_Deep_Q	1.0	norm_simple_mlp	False	0.05	10000000	8	True	ContinuousGridworld/98_9_8_slugs_decentralized	slugs_decentralized	shields/general_shield_radius	0.05
ContinuousGridworld/98_9_8	slugs_centralized	shields/general_shield_radius	True	-10	False	ContinuousGridWorld	ISR	-10	False	False	Individual_Deep_Q	1.0	norm_simple_mlp	False	0.05	10000000	8	True	ContinuousGridworld/98_9_8_none	none		0.05
ContinuousGridworld/99_9_9	slugs_centralized	shields/general_shield_radius	True	-10	False	ContinuousGridWorld	ISR	-10	False	False	Individual_Deep_Q	1.0	norm_simple_mlp	False	0.05	10000000	9	True	ContinuousGridworld/99_9_9_slugs_centralized	slugs_centralized	shields/general_shield_radius	0.05
ContinuousGridworld/99_9_9	slugs_centralized	shields/general_shield_radius	True	-10	False	ContinuousGridWorld	ISR	-10	False	False	Individual_Deep_Q	1.0	norm_simple_mlp	False	0.05	10000000	9	True	ContinuousGridworld/99_9_9_slugs_decentralized	slugs_decentralized	shields/general_shield_radius	0.05
ContinuousGridworld/99_9_9	slugs_centralized	shields/general_shield_radius	True	-10	False	ContinuousGridWorld	ISR	-10	False	False	Individual_Deep_Q	1.0	norm_simple_mlp	False	0.05	10000000	9	True	ContinuousGridworld/99_9_9_none	none		0.05
ContinuousGridworld/100_10_0	slugs_decentralized	shields/general_shield_radius	True	-10	False	ContinuousGridWorld	ISR	-10	False	False	Individual_Deep_Q	1.0	norm_simple_mlp	False	0.05	10000000	0	True	ContinuousGridworld/100_10_0_slugs_centralized	slugs_centralized	shields/general_shield_radius	0.05
ContinuousGridworld/100_10_0	slugs_decentralized	shields/general_shield_radius	True	-10	False	ContinuousGridWorld	ISR	-10	False	False	Individual_Deep_Q	1.0	norm_simple_mlp	False	0.05	10000000	0	True	ContinuousGridworld/100_10_0_slugs_decentralized	slugs_decentralized	shields/general_shield_radius	0.05
ContinuousGridworld/100_10_0	slugs_decentralized	shields/general_shield_radius	True	-10	False	ContinuousGridWorld	ISR	-10	False	False	Individual_Deep_Q	1.0	norm_simple_mlp	False	0.05	10000000	0	True	ContinuousGridworld/100_10_0_none	none		0.05
ContinuousGridworld/101_10_1	slugs_decentralized	shields/general_shield_radius	True	-10	False	ContinuousGridWorld	ISR	-10	False	False	Individual_Deep_Q	1.0	norm_simple_mlp	False	0.05	10000000	1	True	ContinuousGridworld/101_10_1_slugs_centralized	slugs_centralized	shields/general_shield_radius	0.05
ContinuousGridworld/101_10_1	slugs_decentralized	shields/general_shield_radius	True	-10	False	ContinuousGridWorld	ISR	-10	False	False	Individual_Deep_Q	1.0	norm_simple_mlp	False	0.05	10000000	1	True	ContinuousGridworld/101_10_1_slugs_decentralized	slugs_decentralized	shields/general_shield_radius	0.05
ContinuousGridworld/101_10_1	slugs_decentralized	shields/general_shield_radius	True	-10	False	ContinuousGridWorld	ISR	-10	False	False	Individual_Deep_Q	1.0	norm_simple_mlp	False	0.05	10000000	1	True	ContinuousGridworld/101_10_1_none	none		0.05
ContinuousGridworld/102_10_2	slugs_decentralized	shields/general_shield_radius	True	-10	False	ContinuousGridWorld	ISR	-10	False	False	Individual_Deep_Q	1.0	norm_simple_mlp	False	0.05	10000000	2	True	ContinuousGridworld/102_10_2_slugs_centralized	slugs_centralized	shields/general_shield_radius	0.05
ContinuousGridworld/102_10_2	slugs_decentralized	shields/general_shield_radius	True	-10	False	ContinuousGridWorld	ISR	-10	False	False	Individual_Deep_Q	1.0	norm_simple_mlp	False	0.05	10000000	2	True	ContinuousGridworld/102_10_2_slugs_decentralized	slugs_decentralized	shields/general_shield_radius	0.05
ContinuousGridworld/102_10_2	slugs_decentralized	shields/general_shield_radius	True	-10	False	ContinuousGridWorld	ISR	-10	False	False	Individual_Deep_Q	1.0	norm_simple_mlp	False	0.05	10000000	2	True	ContinuousGridworld/102_10_2_none	none		0.05
ContinuousGridworld/103_10_3	slugs_decentralized	shields/general_shield_radius	True	-10	False	ContinuousGridWorld	ISR	-10	False	False	Individual_Deep_Q	1.0	norm_simple_mlp	False	0.05	10000000	3	True	ContinuousGridworld/103_10_3_slugs_centralized	slugs_centralized	shields/general_shield_radius	0.05
ContinuousGridworld/103_10_3	slugs_decentralized	shields/general_shield_radius	True	-10	False	ContinuousGridWorld	ISR	-10	False	False	Individual_Deep_Q	1.0	norm_simple_mlp	False	0.05	10000000	3	True	ContinuousGridworld/103_10_3_slugs_decentralized	slugs_decentralized	shields/general_shield_radius	0.05
ContinuousGridworld/103_10_3	slugs_decentralized	shields/general_shield_radius	True	-10	False	ContinuousGridWorld	ISR	-10	False	False	Individual_Deep_Q	1.0	norm_simple_mlp	False	0.05	10000000	3	True	ContinuousGridworld/103_10_3_none	none		0.05
ContinuousGridworld/104_10_4	slugs_decentralized	shields/general_shield_radius	True	-10	False	ContinuousGridWorld	ISR	-10	False	False	Individual_Deep_Q	1.0	norm_simple_mlp	False	0.05	10000000	4	True	ContinuousGridworld/104_10_4_slugs_centralized	slugs_centralized	shields/general_shield_radius	0.05
ContinuousGridworld/104_10_4	slugs_decentralized	shields/general_shield_radius	True	-10	False	ContinuousGridWorld	ISR	-10	False	False	Individual_Deep_Q	1.0	norm_simple_mlp	False	0.05	10000000	4	True	ContinuousGridworld/104_10_4_slugs_decentralized	slugs_decentralized	shields/general_shield_radius	0.05
ContinuousGridworld/104_10_4	slugs_decentralized	shields/general_shield_radius	True	-10	False	ContinuousGridWorld	ISR	-10	False	False	Individual_Deep_Q	1.0	norm_simple_mlp	False	0.05	10000000	4	True	ContinuousGridworld/104_10_4_none	none		0.05
ContinuousGridworld/105_10_5	slugs_decentralized	shields/general_shield_radius	True	-10	False	ContinuousGridWorld	ISR	-10	False	False	Individual_Deep_Q	1.0	norm_simple_mlp	False	0.05	10000000	5	True	ContinuousGridworld/105_10_5_slugs_centralized	slugs_centralized	shields/general_shield_radius	0.05
ContinuousGridworld/105_10_5	slugs_decentralized	shields/general_shield_radius	True	-10	False	ContinuousGridWorld	ISR	-10	False	False	Individual_Deep_Q	1.0	norm_simple_mlp	False	0.05	10000000	5	True	ContinuousGridworld/105_10_5_slugs_decentralized	slugs_decentralized	shields/general_shield_radius	0.05
ContinuousGridworld/105_10_5	slugs_decentralized	shields/general_shield_radius	True	-10	False	ContinuousGridWorld	ISR	-10	False	False	Individual_Deep_Q	1.0	norm_simple_mlp	False	0.05	10000000	5	True	ContinuousGridworld/105_10_5_none	none		0.05
ContinuousGridworld/106_10_6	slugs_decentralized	shields/general_shield_radius	True	-10	False	ContinuousGridWorld	ISR	-10	False	False	Individual_Deep_Q	1.0	norm_simple_mlp	False	0.05	10000000	6	True	ContinuousGridworld/106_10_6_slugs_centralized	slugs_centralized	shields/general_shield_radius	0.05
ContinuousGridworld/106_10_6	slugs_decentralized	shields/general_shield_radius	True	-10	False	ContinuousGridWorld	ISR	-10	False	False	Individual_Deep_Q	1.0	norm_simple_mlp	False	0.05	10000000	6	True	ContinuousGridworld/106_10_6_slugs_decentralized	slugs_decentralized	shields/general_shield_radius	0.05
ContinuousGridworld/106_10_6	slugs_decentralized	shields/general_shield_radius	True	-10	False	ContinuousGridWorld	ISR	-10	False	False	Individual_Deep_Q	1.0	norm_simple_mlp	False	0.05	10000000	6	True	ContinuousGridworld/106_10_6_none	none		0.05
ContinuousGridworld/107_10_7	slugs_decentralized	shields/general_shield_radius	True	-10	False	ContinuousGridWorld	ISR	-10	False	False	Individual_Deep_Q	1.0	norm_simple_mlp	False	0.05	10000000	7	True	ContinuousGridworld/107_10_7_slugs_centralized	slugs_centralized	shields/general_shield_radius	0.05
ContinuousGridworld/107_10_7	slugs_decentralized	shields/general_shield_radius	True	-10	False	ContinuousGridWorld	ISR	-10	False	False	Individual_Deep_Q	1.0	norm_simple_mlp	False	0.05	10000000	7	True	ContinuousGridworld/107_10_7_slugs_decentralized	slugs_decentralized	shields/general_shield_radius	0.05
ContinuousGridworld/107_10_7	slugs_decentralized	shields/general_shield_radius	True	-10	False	ContinuousGridWorld	ISR	-10	False	False	Individual_Deep_Q	1.0	norm_simple_mlp	False	0.05	10000000	7	True	ContinuousGridworld/107_10_7_none	none		0.05
ContinuousGridworld/108_10_8	slugs_decentralized	shields/general_shield_radius	True	-10	False	ContinuousGridWorld	ISR	-10	False	False	Individual_Deep_Q	1.0	norm_simple_mlp	False	0.05	10000000	8	True	ContinuousGridworld/108_10_8_slugs_centralized	slugs_centralized	shields/general_shield_radius	0.05
ContinuousGridworld/108_10_8	slugs_decentralized	shields/general_shield_radius	True	-10	False	ContinuousGridWorld	ISR	-10	False	False	Individual_Deep_Q	1.0	norm_simple_mlp	False	0.05	10000000	8	True	ContinuousGridworld/108_10_8_slugs_decentralized	slugs_decentralized	shields/general_shield_radius	0.05
ContinuousGridworld/108_10_8	slugs_decentralized	shields/general_shield_radius	True	-10	False	ContinuousGridWorld	ISR	-10	False	False	Individual_Deep_Q	1.0	norm_simple_mlp	False	0.05	10000000	8	True	ContinuousGridworld/108_10_8_none	none		0.05
ContinuousGridworld/109_10_9	slugs_decentralized	shields/general_shield_radius	True	-10	False	ContinuousGridWorld	ISR	-10	False	False	Individual_Deep_Q	1.0	norm_simple_mlp	False	0.05	10000000	9	True	ContinuousGridworld/109_10_9_slugs_centralized	slugs_centralized	shields/general_shield_radius	0.05
ContinuousGridworld/109_10_9	slugs_decentralized	shields/general_shield_radius	True	-10	False	ContinuousGridWorld	ISR	-10	False	False	Individual_Deep_Q	1.0	norm_simple_mlp	False	0.05	10000000	9	True	ContinuousGridworld/109_10_9_slugs_decentralized	slugs_decentralized	shields/general_shield_radius	0.05
ContinuousGridworld/109_10_9	slugs_decentralized	shields/general_shield_radius	True	-10	False	ContinuousGridWorld	ISR	-10	False	False	Individual_Deep_Q	1.0	norm_simple_mlp	False	0.05	10000000	9	True	ContinuousGridworld/109_10_9_none	none		0.05
ContinuousGridworld/110_11_0	none		True	-10	False	ContinuousGridWorld	ISR	-10	False	False	Individual_Deep_Q	1.0	norm_simple_mlp	False	0.05	10000000	0	True	ContinuousGridworld/110_11_0_slugs_centralized	slugs_centralized	shields/general_shield_radius	0.05
ContinuousGridworld/110_11_0	none		True	-10	False	ContinuousGridWorld	ISR	-10	False	False	Individual_Deep_Q	1.0	norm_simple_mlp	False	0.05	10000000	0	True	ContinuousGridworld/110_11_0_slugs_decentralized	slugs_decentralized	shields/general_shield_radius	0.05
ContinuousGridworld/110_11_0	none		True	-10	False	ContinuousGridWorld	ISR	-10	False	False	Individual_Deep_Q	1.0	norm_simple_mlp	False	0.05	10000000	0	True	ContinuousGridworld/110_11_0_none	none		0.05
ContinuousGridworld/111_11_1	none		True	-10	False	ContinuousGridWorld	ISR	-10	False	False	Individual_Deep_Q	1.0	norm_simple_mlp	False	0.05	10000000	1	True	ContinuousGridworld/111_11_1_slugs_centralized	slugs_centralized	shields/general_shield_radius	0.05
ContinuousGridworld/111_11_1	none		True	-10	False	ContinuousGridWorld	ISR	-10	False	False	Individual_Deep_Q	1.0	norm_simple_mlp	False	0.05	10000000	1	True	ContinuousGridworld/111_11_1_slugs_decentralized	slugs_decentralized	shields/general_shield_radius	0.05
ContinuousGridworld/111_11_1	none		True	-10	False	ContinuousGridWorld	ISR	-10	False	False	Individual_Deep_Q	1.0	norm_simple_mlp	False	0.05	10000000	1	True	ContinuousGridworld/111_11_1_none	none		0.05
ContinuousGridworld/112_11_2	none		True	-10	False	ContinuousGridWorld	ISR	-10	False	False	Individual_Deep_Q	1.0	norm_simple_mlp	False	0.05	10000000	2	True	ContinuousGridworld/112_11_2_slugs_centralized	slugs_centralized	shields/general_shield_radius	0.05
ContinuousGridworld/112_11_2	none		True	-10	False	ContinuousGridWorld	ISR	-10	False	False	Individual_Deep_Q	1.0	norm_simple_mlp	False	0.05	10000000	2	True	ContinuousGridworld/112_11_2_slugs_decentralized	slugs_decentralized	shields/general_shield_radius	0.05
ContinuousGridworld/112_11_2	none		True	-10	False	ContinuousGridWorld	ISR	-10	False	False	Individual_Deep_Q	1.0	norm_simple_mlp	False	0.05	10000000	2	True	ContinuousGridworld/112_11_2_none	none		0.05
ContinuousGridworld/113_11_3	none		True	-10	False	ContinuousGridWorld	ISR	-10	False	False	Individual_Deep_Q	1.0	norm_simple_mlp	False	0.05	10000000	3	True	ContinuousGridworld/113_11_3_slugs_centralized	slugs_centralized	shields/general_shield_radius	0.05
ContinuousGridworld/113_11_3	none		True	-10	False	ContinuousGridWorld	ISR	-10	False	False	Individual_Deep_Q	1.0	norm_simple_mlp	False	0.05	10000000	3	True	ContinuousGridworld/113_11_3_slugs_decentralized	slugs_decentralized	shields/general_shield_radius	0.05
ContinuousGridworld/113_11_3	none		True	-10	False	ContinuousGridWorld	ISR	-10	False	False	Individual_Deep_Q	1.0	norm_simple_mlp	False	0.05	10000000	3	True	ContinuousGridworld/113_11_3_none	none		0.05
ContinuousGridworld/114_11_4	none		True	-10	False	ContinuousGridWorld	ISR	-10	False	False	Individual_Deep_Q	1.0	norm_simple_mlp	False	0.05	10000000	4	True	ContinuousGridworld/114_11_4_slugs_centralized	slugs_centralized	shields/general_shield_radius	0.05
ContinuousGridworld/114_11_4	none		True	-10	False	ContinuousGridWorld	ISR	-10	False	False	Individual_Deep_Q	1.0	norm_simple_mlp	False	0.05	10000000	4	True	ContinuousGridworld/114_11_4_slugs_decentralized	slugs_decentralized	shields/general_shield_radius	0.05
ContinuousGridworld/114_11_4	none		True	-10	False	ContinuousGridWorld	ISR	-10	False	False	Individual_Deep_Q	1.0	norm_simple_mlp	False	0.05	10000000	4	True	ContinuousGridworld/114_11_4_none	none		0.05
ContinuousGridworld/115_11_5	none		True	-10	False	ContinuousGridWorld	ISR	-10	False	False	Individual_Deep_Q	1.0	norm_simple_mlp	False	0.05	10000000	5	True	ContinuousGridworld/115_11_5_slugs_centralized	slugs_centralized	shields/general_shield_radius	0.05
ContinuousGridworld/115_11_5	none		True	-10	False	ContinuousGridWorld	ISR	-10	False	False	Individual_Deep_Q	1.0	norm_simple_mlp	False	0.05	10000000	5	True	ContinuousGridworld/115_11_5_slugs_decentralized	slugs_decentralized	shields/general_shield_radius	0.05
ContinuousGridworld/115_11_5	none		True	-10	False	ContinuousGridWorld	ISR	-10	False	False	Individual_Deep_Q	1.0	norm_simple_mlp	False	0.05	10000000	5	True	ContinuousGridworld/115_11_5_none	none		0.05
ContinuousGridworld/116_11_6	none		True	-10	False	ContinuousGridWorld	ISR	-10	False	False	Individual_Deep_Q	1.0	norm_simple_mlp	False	0.05	10000000	6	True	ContinuousGridworld/116_11_6_slugs_centralized	slugs_centralized	shields/general_shield_radius	0.05
ContinuousGridworld/116_11_6	none		True	-10	False	ContinuousGridWorld	ISR	-10	False	False	Individual_Deep_Q	1.0	norm_simple_mlp	False	0.05	10000000	6	True	ContinuousGridworld/116_11_6_slugs_decentralized	slugs_decentralized	shields/general_shield_radius	0.05
ContinuousGridworld/116_11_6	none		True	-10	False	ContinuousGridWorld	ISR	-10	False	False	Individual_Deep_Q	1.0	norm_simple_mlp	False	0.05	10000000	6	True	ContinuousGridworld/116_11_6_none	none		0.05
ContinuousGridworld/117_11_7	none		True	-10	False	ContinuousGridWorld	ISR	-10	False	False	Individual_Deep_Q	1.0	norm_simple_mlp	False	0.05	10000000	7	True	ContinuousGridworld/117_11_7_slugs_centralized	slugs_centralized	shields/general_shield_radius	0.05
ContinuousGridworld/117_11_7	none		True	-10	False	ContinuousGridWorld	ISR	-10	False	False	Individual_Deep_Q	1.0	norm_simple_mlp	False	0.05	10000000	7	True	ContinuousGridworld/117_11_7_slugs_decentralized	slugs_decentralized	shields/general_shield_radius	0.05
ContinuousGridworld/117_11_7	none		True	-10	False	ContinuousGridWorld	ISR	-10	False	False	Individual_Deep_Q	1.0	norm_simple_mlp	False	0.05	10000000	7	True	ContinuousGridworld/117_11_7_none	none		0.05
ContinuousGridworld/118_11_8	none		True	-10	False	ContinuousGridWorld	ISR	-10	False	False	Individual_Deep_Q	1.0	norm_simple_mlp	False	0.05	10000000	8	True	ContinuousGridworld/118_11_8_slugs_centralized	slugs_centralized	shields/general_shield_radius	0.05
ContinuousGridworld/118_11_8	none		True	-10	False	ContinuousGridWorld	ISR	-10	False	False	Individual_Deep_Q	1.0	norm_simple_mlp	False	0.05	10000000	8	True	ContinuousGridworld/118_11_8_slugs_decentralized	slugs_decentralized	shields/general_shield_radius	0.05
ContinuousGridworld/118_11_8	none		True	-10	False	ContinuousGridWorld	ISR	-10	False	False	Individual_Deep_Q	1.0	norm_simple_mlp	False	0.05	10000000	8	True	ContinuousGridworld/118_11_8_none	none		0.05
ContinuousGridworld/119_11_9	none		True	-10	False	ContinuousGridWorld	ISR	-10	False	False	Individual_Deep_Q	1.0	norm_simple_mlp	False	0.05	10000000	9	True	ContinuousGridworld/119_11_9_slugs_centralized	slugs_centralized	shields/general_shield_radius	0.05
ContinuousGridworld/119_11_9	none		True	-10	False	ContinuousGridWorld	ISR	-10	False	False	Individual_Deep_Q	1.0	norm_simple_mlp	False	0.05	10000000	9	True	ContinuousGridworld/119_11_9_slugs_decentralized	slugs_decentralized	shields/general_shield_radius	0.05
ContinuousGridworld/119_11_9	none		True	-10	False	ContinuousGridWorld	ISR	-10	False	False	Individual_Deep_Q	1.0	norm_simple_mlp	False	0.05	10000000	9	True	ContinuousGridworld/119_11_9_none	none		0.05
ContinuousGridworld/120_12_0	slugs_centralized	shields/general_shield_radius	True	-10	True	ContinuousGridWorld	SUNY	-10	False	False	Individual_Deep_Q	1.0	norm_simple_mlp	False	0.05	10000000	0	True	ContinuousGridworld/120_12_0_slugs_centralized	slugs_centralized	shields/general_shield_radius	0.05
ContinuousGridworld/120_12_0	slugs_centralized	shields/general_shield_radius	True	-10	True	ContinuousGridWorld	SUNY	-10	False	False	Individual_Deep_Q	1.0	norm_simple_mlp	False	0.05	10000000	0	True	ContinuousGridworld/120_12_0_slugs_decentralized	slugs_decentralized	shields/general_shield_radius	0.05
ContinuousGridworld/120_12_0	slugs_centralized	shields/general_shield_radius	True	-10	True	ContinuousGridWorld	SUNY	-10	False	False	Individual_Deep_Q	1.0	norm_simple_mlp	False	0.05	10000000	0	True	ContinuousGridworld/120_12_0_none	none		0.05
ContinuousGridworld/121_12_1	slugs_centralized	shields/general_shield_radius	True	-10	True	ContinuousGridWorld	SUNY	-10	False	False	Individual_Deep_Q	1.0	norm_simple_mlp	False	0.05	10000000	1	True	ContinuousGridworld/121_12_1_slugs_centralized	slugs_centralized	shields/general_shield_radius	0.05
ContinuousGridworld/121_12_1	slugs_centralized	shields/general_shield_radius	True	-10	True	ContinuousGridWorld	SUNY	-10	False	False	Individual_Deep_Q	1.0	norm_simple_mlp	False	0.05	10000000	1	True	ContinuousGridworld/121_12_1_slugs_decentralized	slugs_decentralized	shields/general_shield_radius	0.05
ContinuousGridworld/121_12_1	slugs_centralized	shields/general_shield_radius	True	-10	True	ContinuousGridWorld	SUNY	-10	False	False	Individual_Deep_Q	1.0	norm_simple_mlp	False	0.05	10000000	1	True	ContinuousGridworld/121_12_1_none	none		0.05
ContinuousGridworld/122_12_2	slugs_centralized	shields/general_shield_radius	True	-10	True	ContinuousGridWorld	SUNY	-10	False	False	Individual_Deep_Q	1.0	norm_simple_mlp	False	0.05	10000000	2	True	ContinuousGridworld/122_12_2_slugs_centralized	slugs_centralized	shields/general_shield_radius	0.05
ContinuousGridworld/122_12_2	slugs_centralized	shields/general_shield_radius	True	-10	True	ContinuousGridWorld	SUNY	-10	False	False	Individual_Deep_Q	1.0	norm_simple_mlp	False	0.05	10000000	2	True	ContinuousGridworld/122_12_2_slugs_decentralized	slugs_decentralized	shields/general_shield_radius	0.05
ContinuousGridworld/122_12_2	slugs_centralized	shields/general_shield_radius	True	-10	True	ContinuousGridWorld	SUNY	-10	False	False	Individual_Deep_Q	1.0	norm_simple_mlp	False	0.05	10000000	2	True	ContinuousGridworld/122_12_2_none	none		0.05
ContinuousGridworld/123_12_3	slugs_centralized	shields/general_shield_radius	True	-10	True	ContinuousGridWorld	SUNY	-10	False	False	Individual_Deep_Q	1.0	norm_simple_mlp	False	0.05	10000000	3	True	ContinuousGridworld/123_12_3_slugs_centralized	slugs_centralized	shields/general_shield_radius	0.05
ContinuousGridworld/123_12_3	slugs_centralized	shields/general_shield_radius	True	-10	True	ContinuousGridWorld	SUNY	-10	False	False	Individual_Deep_Q	1.0	norm_simple_mlp	False	0.05	10000000	3	True	ContinuousGridworld/123_12_3_slugs_decentralized	slugs_decentralized	shields/general_shield_radius	0.05
ContinuousGridworld/123_12_3	slugs_centralized	shields/general_shield_radius	True	-10	True	ContinuousGridWorld	SUNY	-10	False	False	Individual_Deep_Q	1.0	norm_simple_mlp	False	0.05	10000000	3	True	ContinuousGridworld/123_12_3_none	none		0.05
ContinuousGridworld/124_12_4	slugs_centralized	shields/general_shield_radius	True	-10	True	ContinuousGridWorld	SUNY	-10	False	False	Individual_Deep_Q	1.0	norm_simple_mlp	False	0.05	10000000	4	True	ContinuousGridworld/124_12_4_slugs_centralized	slugs_centralized	shields/general_shield_radius	0.05
ContinuousGridworld/124_12_4	slugs_centralized	shields/general_shield_radius	True	-10	True	ContinuousGridWorld	SUNY	-10	False	False	Individual_Deep_Q	1.0	norm_simple_mlp	False	0.05	10000000	4	True	ContinuousGridworld/124_12_4_slugs_decentralized	slugs_decentralized	shields/general_shield_radius	0.05
ContinuousGridworld/124_12_4	slugs_centralized	shields/general_shield_radius	True	-10	True	ContinuousGridWorld	SUNY	-10	False	False	Individual_Deep_Q	1.0	norm_simple_mlp	False	0.05	10000000	4	True	ContinuousGridworld/124_12_4_none	none		0.05
ContinuousGridworld/125_12_5	slugs_centralized	shields/general_shield_radius	True	-10	True	ContinuousGridWorld	SUNY	-10	False	False	Individual_Deep_Q	1.0	norm_simple_mlp	False	0.05	10000000	5	True	ContinuousGridworld/125_12_5_slugs_centralized	slugs_centralized	shields/general_shield_radius	0.05
ContinuousGridworld/125_12_5	slugs_centralized	shields/general_shield_radius	True	-10	True	ContinuousGridWorld	SUNY	-10	False	False	Individual_Deep_Q	1.0	norm_simple_mlp	False	0.05	10000000	5	True	ContinuousGridworld/125_12_5_slugs_decentralized	slugs_decentralized	shields/general_shield_radius	0.05
ContinuousGridworld/125_12_5	slugs_centralized	shields/general_shield_radius	True	-10	True	ContinuousGridWorld	SUNY	-10	False	False	Individual_Deep_Q	1.0	norm_simple_mlp	False	0.05	10000000	5	True	ContinuousGridworld/125_12_5_none	none		0.05
ContinuousGridworld/126_12_6	slugs_centralized	shields/general_shield_radius	True	-10	True	ContinuousGridWorld	SUNY	-10	False	False	Individual_Deep_Q	1.0	norm_simple_mlp	False	0.05	10000000	6	True	ContinuousGridworld/126_12_6_slugs_centralized	slugs_centralized	shields/general_shield_radius	0.05
ContinuousGridworld/126_12_6	slugs_centralized	shields/general_shield_radius	True	-10	True	ContinuousGridWorld	SUNY	-10	False	False	Individual_Deep_Q	1.0	norm_simple_mlp	False	0.05	10000000	6	True	ContinuousGridworld/126_12_6_slugs_decentralized	slugs_decentralized	shields/general_shield_radius	0.05
ContinuousGridworld/126_12_6	slugs_centralized	shields/general_shield_radius	True	-10	True	ContinuousGridWorld	SUNY	-10	False	False	Individual_Deep_Q	1.0	norm_simple_mlp	False	0.05	10000000	6	True	ContinuousGridworld/126_12_6_none	none		0.05
ContinuousGridworld/127_12_7	slugs_centralized	shields/general_shield_radius	True	-10	True	ContinuousGridWorld	SUNY	-10	False	False	Individual_Deep_Q	1.0	norm_simple_mlp	False	0.05	10000000	7	True	ContinuousGridworld/127_12_7_slugs_centralized	slugs_centralized	shields/general_shield_radius	0.05
ContinuousGridworld/127_12_7	slugs_centralized	shields/general_shield_radius	True	-10	True	ContinuousGridWorld	SUNY	-10	False	False	Individual_Deep_Q	1.0	norm_simple_mlp	False	0.05	10000000	7	True	ContinuousGridworld/127_12_7_slugs_decentralized	slugs_decentralized	shields/general_shield_radius	0.05
ContinuousGridworld/127_12_7	slugs_centralized	shields/general_shield_radius	True	-10	True	ContinuousGridWorld	SUNY	-10	False	False	Individual_Deep_Q	1.0	norm_simple_mlp	False	0.05	10000000	7	True	ContinuousGridworld/127_12_7_none	none		0.05
ContinuousGridworld/128_12_8	slugs_centralized	shields/general_shield_radius	True	-10	True	ContinuousGridWorld	SUNY	-10	False	False	Individual_Deep_Q	1.0	norm_simple_mlp	False	0.05	10000000	8	True	ContinuousGridworld/128_12_8_slugs_centralized	slugs_centralized	shields/general_shield_radius	0.05
ContinuousGridworld/128_12_8	slugs_centralized	shields/general_shield_radius	True	-10	True	ContinuousGridWorld	SUNY	-10	False	False	Individual_Deep_Q	1.0	norm_simple_mlp	False	0.05	10000000	8	True	ContinuousGridworld/128_12_8_slugs_decentralized	slugs_decentralized	shields/general_shield_radius	0.05
ContinuousGridworld/128_12_8	slugs_centralized	shields/general_shield_radius	True	-10	True	ContinuousGridWorld	SUNY	-10	False	False	Individual_Deep_Q	1.0	norm_simple_mlp	False	0.05	10000000	8	True	ContinuousGridworld/128_12_8_none	none		0.05
ContinuousGridworld/129_12_9	slugs_centralized	shields/general_shield_radius	True	-10	True	ContinuousGridWorld	SUNY	-10	False	False	Individual_Deep_Q	1.0	norm_simple_mlp	False	0.05	10000000	9	True	ContinuousGridworld/129_12_9_slugs_centralized	slugs_centralized	shields/general_shield_radius	0.05
ContinuousGridworld/129_12_9	slugs_centralized	shields/general_shield_radius	True	-10	True	ContinuousGridWorld	SUNY	-10	False	False	Individual_Deep_Q	1.0	norm_simple_mlp	False	0.05	10000000	9	True	ContinuousGridworld/129_12_9_slugs_decentralized	slugs_decentralized	shields/general_shield_radius	0.05
ContinuousGridworld/129_12_9	slugs_centralized	shields/general_shield_radius	True	-10	True	ContinuousGridWorld	SUNY	-10	False	False	Individual_Deep_Q	1.0	norm_simple_mlp	False	0.05	10000000	9	True	ContinuousGridworld/129_12_9_none	none		0.05
ContinuousGridworld/130_13_0	slugs_decentralized	shields/general_shield_radius	True	-10	True	ContinuousGridWorld	SUNY	-10	False	False	Individual_Deep_Q	1.0	norm_simple_mlp	False	0.05	10000000	0	True	ContinuousGridworld/130_13_0_slugs_centralized	slugs_centralized	shields/general_shield_radius	0.05
ContinuousGridworld/130_13_0	slugs_decentralized	shields/general_shield_radius	True	-10	True	ContinuousGridWorld	SUNY	-10	False	False	Individual_Deep_Q	1.0	norm_simple_mlp	False	0.05	10000000	0	True	ContinuousGridworld/130_13_0_slugs_decentralized	slugs_decentralized	shields/general_shield_radius	0.05
ContinuousGridworld/130_13_0	slugs_decentralized	shields/general_shield_radius	True	-10	True	ContinuousGridWorld	SUNY	-10	False	False	Individual_Deep_Q	1.0	norm_simple_mlp	False	0.05	10000000	0	True	ContinuousGridworld/130_13_0_none	none		0.05
ContinuousGridworld/131_13_1	slugs_decentralized	shields/general_shield_radius	True	-10	True	ContinuousGridWorld	SUNY	-10	False	False	Individual_Deep_Q	1.0	norm_simple_mlp	False	0.05	10000000	1	True	ContinuousGridworld/131_13_1_slugs_centralized	slugs_centralized	shields/general_shield_radius	0.05
ContinuousGridworld/131_13_1	slugs_decentralized	shields/general_shield_radius	True	-10	True	ContinuousGridWorld	SUNY	-10	False	False	Individual_Deep_Q	1.0	norm_simple_mlp	False	0.05	10000000	1	True	ContinuousGridworld/131_13_1_slugs_decentralized	slugs_decentralized	shields/general_shield_radius	0.05
ContinuousGridworld/131_13_1	slugs_decentralized	shields/general_shield_radius	True	-10	True	ContinuousGridWorld	SUNY	-10	False	False	Individual_Deep_Q	1.0	norm_simple_mlp	False	0.05	10000000	1	True	ContinuousGridworld/131_13_1_none	none		0.05
ContinuousGridworld/132_13_2	slugs_decentralized	shields/general_shield_radius	True	-10	True	ContinuousGridWorld	SUNY	-10	False	False	Individual_Deep_Q	1.0	norm_simple_mlp	False	0.05	10000000	2	True	ContinuousGridworld/132_13_2_slugs_centralized	slugs_centralized	shields/general_shield_radius	0.05
ContinuousGridworld/132_13_2	slugs_decentralized	shields/general_shield_radius	True	-10	True	ContinuousGridWorld	SUNY	-10	False	False	Individual_Deep_Q	1.0	norm_simple_mlp	False	0.05	10000000	2	True	ContinuousGridworld/132_13_2_slugs_decentralized	slugs_decentralized	shields/general_shield_radius	0.05
ContinuousGridworld/132_13_2	slugs_decentralized	shields/general_shield_radius	True	-10	True	ContinuousGridWorld	SUNY	-10	False	False	Individual_Deep_Q	1.0	norm_simple_mlp	False	0.05	10000000	2	True	ContinuousGridworld/132_13_2_none	none		0.05
ContinuousGridworld/133_13_3	slugs_decentralized	shields/general_shield_radius	True	-10	True	ContinuousGridWorld	SUNY	-10	False	False	Individual_Deep_Q	1.0	norm_simple_mlp	False	0.05	10000000	3	True	ContinuousGridworld/133_13_3_slugs_centralized	slugs_centralized	shields/general_shield_radius	0.05
ContinuousGridworld/133_13_3	slugs_decentralized	shields/general_shield_radius	True	-10	True	ContinuousGridWorld	SUNY	-10	False	False	Individual_Deep_Q	1.0	norm_simple_mlp	False	0.05	10000000	3	True	ContinuousGridworld/133_13_3_slugs_decentralized	slugs_decentralized	shields/general_shield_radius	0.05
ContinuousGridworld/133_13_3	slugs_decentralized	shields/general_shield_radius	True	-10	True	ContinuousGridWorld	SUNY	-10	False	False	Individual_Deep_Q	1.0	norm_simple_mlp	False	0.05	10000000	3	True	ContinuousGridworld/133_13_3_none	none		0.05
ContinuousGridworld/134_13_4	slugs_decentralized	shields/general_shield_radius	True	-10	True	ContinuousGridWorld	SUNY	-10	False	False	Individual_Deep_Q	1.0	norm_simple_mlp	False	0.05	10000000	4	True	ContinuousGridworld/134_13_4_slugs_centralized	slugs_centralized	shields/general_shield_radius	0.05
ContinuousGridworld/134_13_4	slugs_decentralized	shields/general_shield_radius	True	-10	True	ContinuousGridWorld	SUNY	-10	False	False	Individual_Deep_Q	1.0	norm_simple_mlp	False	0.05	10000000	4	True	ContinuousGridworld/134_13_4_slugs_decentralized	slugs_decentralized	shields/general_shield_radius	0.05
ContinuousGridworld/134_13_4	slugs_decentralized	shields/general_shield_radius	True	-10	True	ContinuousGridWorld	SUNY	-10	False	False	Individual_Deep_Q	1.0	norm_simple_mlp	False	0.05	10000000	4	True	ContinuousGridworld/134_13_4_none	none		0.05
ContinuousGridworld/135_13_5	slugs_decentralized	shields/general_shield_radius	True	-10	True	ContinuousGridWorld	SUNY	-10	False	False	Individual_Deep_Q	1.0	norm_simple_mlp	False	0.05	10000000	5	True	ContinuousGridworld/135_13_5_slugs_centralized	slugs_centralized	shields/general_shield_radius	0.05
ContinuousGridworld/135_13_5	slugs_decentralized	shields/general_shield_radius	True	-10	True	ContinuousGridWorld	SUNY	-10	False	False	Individual_Deep_Q	1.0	norm_simple_mlp	False	0.05	10000000	5	True	ContinuousGridworld/135_13_5_slugs_decentralized	slugs_decentralized	shields/general_shield_radius	0.05
ContinuousGridworld/135_13_5	slugs_decentralized	shields/general_shield_radius	True	-10	True	ContinuousGridWorld	SUNY	-10	False	False	Individual_Deep_Q	1.0	norm_simple_mlp	False	0.05	10000000	5	True	ContinuousGridworld/135_13_5_none	none		0.05
ContinuousGridworld/136_13_6	slugs_decentralized	shields/general_shield_radius	True	-10	True	ContinuousGridWorld	SUNY	-10	False	False	Individual_Deep_Q	1.0	norm_simple_mlp	False	0.05	10000000	6	True	ContinuousGridworld/136_13_6_slugs_centralized	slugs_centralized	shields/general_shield_radius	0.05
ContinuousGridworld/136_13_6	slugs_decentralized	shields/general_shield_radius	True	-10	True	ContinuousGridWorld	SUNY	-10	False	False	Individual_Deep_Q	1.0	norm_simple_mlp	False	0.05	10000000	6	True	ContinuousGridworld/136_13_6_slugs_decentralized	slugs_decentralized	shields/general_shield_radius	0.05
ContinuousGridworld/136_13_6	slugs_decentralized	shields/general_shield_radius	True	-10	True	ContinuousGridWorld	SUNY	-10	False	False	Individual_Deep_Q	1.0	norm_simple_mlp	False	0.05	10000000	6	True	ContinuousGridworld/136_13_6_none	none		0.05
ContinuousGridworld/137_13_7	slugs_decentralized	shields/general_shield_radius	True	-10	True	ContinuousGridWorld	SUNY	-10	False	False	Individual_Deep_Q	1.0	norm_simple_mlp	False	0.05	10000000	7	True	ContinuousGridworld/137_13_7_slugs_centralized	slugs_centralized	shields/general_shield_radius	0.05
ContinuousGridworld/137_13_7	slugs_decentralized	shields/general_shield_radius	True	-10	True	ContinuousGridWorld	SUNY	-10	False	False	Individual_Deep_Q	1.0	norm_simple_mlp	False	0.05	10000000	7	True	ContinuousGridworld/137_13_7_slugs_decentralized	slugs_decentralized	shields/general_shield_radius	0.05
ContinuousGridworld/137_13_7	slugs_decentralized	shields/general_shield_radius	True	-10	True	ContinuousGridWorld	SUNY	-10	False	False	Individual_Deep_Q	1.0	norm_simple_mlp	False	0.05	10000000	7	True	ContinuousGridworld/137_13_7_none	none		0.05
ContinuousGridworld/138_13_8	slugs_decentralized	shields/general_shield_radius	True	-10	True	ContinuousGridWorld	SUNY	-10	False	False	Individual_Deep_Q	1.0	norm_simple_mlp	False	0.05	10000000	8	True	ContinuousGridworld/138_13_8_slugs_centralized	slugs_centralized	shields/general_shield_radius	0.05
ContinuousGridworld/138_13_8	slugs_decentralized	shields/general_shield_radius	True	-10	True	ContinuousGridWorld	SUNY	-10	False	False	Individual_Deep_Q	1.0	norm_simple_mlp	False	0.05	10000000	8	True	ContinuousGridworld/138_13_8_slugs_decentralized	slugs_decentralized	shields/general_shield_radius	0.05
ContinuousGridworld/138_13_8	slugs_decentralized	shields/general_shield_radius	True	-10	True	ContinuousGridWorld	SUNY	-10	False	False	Individual_Deep_Q	1.0	norm_simple_mlp	False	0.05	10000000	8	True	ContinuousGridworld/138_13_8_none	none		0.05
ContinuousGridworld/139_13_9	slugs_decentralized	shields/general_shield_radius	True	-10	True	ContinuousGridWorld	SUNY	-10	False	False	Individual_Deep_Q	1.0	norm_simple_mlp	False	0.05	10000000	9	True	ContinuousGridworld/139_13_9_slugs_centralized	slugs_centralized	shields/general_shield_radius	0.05
ContinuousGridworld/139_13_9	slugs_decentralized	shields/general_shield_radius	True	-10	True	ContinuousGridWorld	SUNY	-10	False	False	Individual_Deep_Q	1.0	norm_simple_mlp	False	0.05	10000000	9	True	ContinuousGridworld/139_13_9_slugs_decentralized	slugs_decentralized	shields/general_shield_radius	0.05
ContinuousGridworld/139_13_9	slugs_decentralized	shields/general_shield_radius	True	-10	True	ContinuousGridWorld	SUNY	-10	False	False	Individual_Deep_Q	1.0	norm_simple_mlp	False	0.05	10000000	9	True	ContinuousGridworld/139_13_9_none	none		0.05
ContinuousGridworld/140_14_0	none		True	-10	True	ContinuousGridWorld	SUNY	-10	False	False	Individual_Deep_Q	1.0	norm_simple_mlp	False	0.05	10000000	0	True	ContinuousGridworld/140_14_0_slugs_centralized	slugs_centralized	shields/general_shield_radius	0.05
ContinuousGridworld/140_14_0	none		True	-10	True	ContinuousGridWorld	SUNY	-10	False	False	Individual_Deep_Q	1.0	norm_simple_mlp	False	0.05	10000000	0	True	ContinuousGridworld/140_14_0_slugs_decentralized	slugs_decentralized	shields/general_shield_radius	0.05
ContinuousGridworld/140_14_0	none		True	-10	True	ContinuousGridWorld	SUNY	-10	False	False	Individual_Deep_Q	1.0	norm_simple_mlp	False	0.05	10000000	0	True	ContinuousGridworld/140_14_0_none	none		0.05
ContinuousGridworld/141_14_1	none		True	-10	True	ContinuousGridWorld	SUNY	-10	False	False	Individual_Deep_Q	1.0	norm_simple_mlp	False	0.05	10000000	1	True	ContinuousGridworld/141_14_1_slugs_centralized	slugs_centralized	shields/general_shield_radius	0.05
ContinuousGridworld/141_14_1	none		True	-10	True	ContinuousGridWorld	SUNY	-10	False	False	Individual_Deep_Q	1.0	norm_simple_mlp	False	0.05	10000000	1	True	ContinuousGridworld/141_14_1_slugs_decentralized	slugs_decentralized	shields/general_shield_radius	0.05
ContinuousGridworld/141_14_1	none		True	-10	True	ContinuousGridWorld	SUNY	-10	False	False	Individual_Deep_Q	1.0	norm_simple_mlp	False	0.05	10000000	1	True	ContinuousGridworld/141_14_1_none	none		0.05
ContinuousGridworld/142_14_2	none		True	-10	True	ContinuousGridWorld	SUNY	-10	False	False	Individual_Deep_Q	1.0	norm_simple_mlp	False	0.05	10000000	2	True	ContinuousGridworld/142_14_2_slugs_centralized	slugs_centralized	shields/general_shield_radius	0.05
ContinuousGridworld/142_14_2	none		True	-10	True	ContinuousGridWorld	SUNY	-10	False	False	Individual_Deep_Q	1.0	norm_simple_mlp	False	0.05	10000000	2	True	ContinuousGridworld/142_14_2_slugs_decentralized	slugs_decentralized	shields/general_shield_radius	0.05
ContinuousGridworld/142_14_2	none		True	-10	True	ContinuousGridWorld	SUNY	-10	False	False	Individual_Deep_Q	1.0	norm_simple_mlp	False	0.05	10000000	2	True	ContinuousGridworld/142_14_2_none	none		0.05
ContinuousGridworld/143_14_3	none		True	-10	True	ContinuousGridWorld	SUNY	-10	False	False	Individual_Deep_Q	1.0	norm_simple_mlp	False	0.05	10000000	3	True	ContinuousGridworld/143_14_3_slugs_centralized	slugs_centralized	shields/general_shield_radius	0.05
ContinuousGridworld/143_14_3	none		True	-10	True	ContinuousGridWorld	SUNY	-10	False	False	Individual_Deep_Q	1.0	norm_simple_mlp	False	0.05	10000000	3	True	ContinuousGridworld/143_14_3_slugs_decentralized	slugs_decentralized	shields/general_shield_radius	0.05
ContinuousGridworld/143_14_3	none		True	-10	True	ContinuousGridWorld	SUNY	-10	False	False	Individual_Deep_Q	1.0	norm_simple_mlp	False	0.05	10000000	3	True	ContinuousGridworld/143_14_3_none	none		0.05
ContinuousGridworld/144_14_4	none		True	-10	True	ContinuousGridWorld	SUNY	-10	False	False	Individual_Deep_Q	1.0	norm_simple_mlp	False	0.05	10000000	4	True	ContinuousGridworld/144_14_4_slugs_centralized	slugs_centralized	shields/general_shield_radius	0.05
ContinuousGridworld/144_14_4	none		True	-10	True	ContinuousGridWorld	SUNY	-10	False	False	Individual_Deep_Q	1.0	norm_simple_mlp	False	0.05	10000000	4	True	ContinuousGridworld/144_14_4_slugs_decentralized	slugs_decentralized	shields/general_shield_radius	0.05
ContinuousGridworld/144_14_4	none		True	-10	True	ContinuousGridWorld	SUNY	-10	False	False	Individual_Deep_Q	1.0	norm_simple_mlp	False	0.05	10000000	4	True	ContinuousGridworld/144_14_4_none	none		0.05
ContinuousGridworld/145_14_5	none		True	-10	True	ContinuousGridWorld	SUNY	-10	False	False	Individual_Deep_Q	1.0	norm_simple_mlp	False	0.05	10000000	5	True	ContinuousGridworld/145_14_5_slugs_centralized	slugs_centralized	shields/general_shield_radius	0.05
ContinuousGridworld/145_14_5	none		True	-10	True	ContinuousGridWorld	SUNY	-10	False	False	Individual_Deep_Q	1.0	norm_simple_mlp	False	0.05	10000000	5	True	ContinuousGridworld/145_14_5_slugs_decentralized	slugs_decentralized	shields/general_shield_radius	0.05
ContinuousGridworld/145_14_5	none		True	-10	True	ContinuousGridWorld	SUNY	-10	False	False	Individual_Deep_Q	1.0	norm_simple_mlp	False	0.05	10000000	5	True	ContinuousGridworld/145_14_5_none	none		0.05
ContinuousGridworld/146_14_6	none		True	-10	True	ContinuousGridWorld	SUNY	-10	False	False	Individual_Deep_Q	1.0	norm_simple_mlp	False	0.05	10000000	6	True	ContinuousGridworld/146_14_6_slugs_centralized	slugs_centralized	shields/general_shield_radius	0.05
ContinuousGridworld/146_14_6	none		True	-10	True	ContinuousGridWorld	SUNY	-10	False	False	Individual_Deep_Q	1.0	norm_simple_mlp	False	0.05	10000000	6	True	ContinuousGridworld/146_14_6_slugs_decentralized	slugs_decentralized	shields/general_shield_radius	0.05
ContinuousGridworld/146_14_6	none		True	-10	True	ContinuousGridWorld	SUNY	-10	False	False	Individual_Deep_Q	1.0	norm_simple_mlp	False	0.05	10000000	6	True	ContinuousGridworld/146_14_6_none	none		0.05
ContinuousGridworld/147_14_7	none		True	-10	True	ContinuousGridWorld	SUNY	-10	False	False	Individual_Deep_Q	1.0	norm_simple_mlp	False	0.05	10000000	7	True	ContinuousGridworld/147_14_7_slugs_centralized	slugs_centralized	shields/general_shield_radius	0.05
ContinuousGridworld/147_14_7	none		True	-10	True	ContinuousGridWorld	SUNY	-10	False	False	Individual_Deep_Q	1.0	norm_simple_mlp	False	0.05	10000000	7	True	ContinuousGridworld/147_14_7_slugs_decentralized	slugs_decentralized	shields/general_shield_radius	0.05
ContinuousGridworld/147_14_7	none		True	-10	True	ContinuousGridWorld	SUNY	-10	False	False	Individual_Deep_Q	1.0	norm_simple_mlp	False	0.05	10000000	7	True	ContinuousGridworld/147_14_7_none	none		0.05
ContinuousGridworld/148_14_8	none		True	-10	True	ContinuousGridWorld	SUNY	-10	False	False	Individual_Deep_Q	1.0	norm_simple_mlp	False	0.05	10000000	8	True	ContinuousGridworld/148_14_8_slugs_centralized	slugs_centralized	shields/general_shield_radius	0.05
ContinuousGridworld/148_14_8	none		True	-10	True	ContinuousGridWorld	SUNY	-10	False	False	Individual_Deep_Q	1.0	norm_simple_mlp	False	0.05	10000000	8	True	ContinuousGridworld/148_14_8_slugs_decentralized	slugs_decentralized	shields/general_shield_radius	0.05
ContinuousGridworld/148_14_8	none		True	-10	True	ContinuousGridWorld	SUNY	-10	False	False	Individual_Deep_Q	1.0	norm_simple_mlp	False	0.05	10000000	8	True	ContinuousGridworld/148_14_8_none	none		0.05
ContinuousGridworld/149_14_9	none		True	-10	True	ContinuousGridWorld	SUNY	-10	False	False	Individual_Deep_Q	1.0	norm_simple_mlp	False	0.05	10000000	9	True	ContinuousGridworld/149_14_9_slugs_centralized	slugs_centralized	shields/general_shield_radius	0.05
ContinuousGridworld/149_14_9	none		True	-10	True	ContinuousGridWorld	SUNY	-10	False	False	Individual_Deep_Q	1.0	norm_simple_mlp	False	0.05	10000000	9	True	ContinuousGridworld/149_14_9_slugs_decentralized	slugs_decentralized	shields/general_shield_radius	0.05
ContinuousGridworld/149_14_9	none		True	-10	True	ContinuousGridWorld	SUNY	-10	False	False	Individual_Deep_Q	1.0	norm_simple_mlp	False	0.05	10000000	9	True	ContinuousGridworld/149_14_9_none	none		0.05
ContinuousGridworld/150_15_0	slugs_centralized	shields/general_shield_radius	True	-10	False	ContinuousGridWorld	SUNY	-10	False	False	Individual_Deep_Q	1.0	norm_simple_mlp	False	0.05	10000000	0	True	ContinuousGridworld/150_15_0_slugs_centralized	slugs_centralized	shields/general_shield_radius	0.05
ContinuousGridworld/150_15_0	slugs_centralized	shields/general_shield_radius	True	-10	False	ContinuousGridWorld	SUNY	-10	False	False	Individual_Deep_Q	1.0	norm_simple_mlp	False	0.05	10000000	0	True	ContinuousGridworld/150_15_0_slugs_decentralized	slugs_decentralized	shields/general_shield_radius	0.05
ContinuousGridworld/150_15_0	slugs_centralized	shields/general_shield_radius	True	-10	False	ContinuousGridWorld	SUNY	-10	False	False	Individual_Deep_Q	1.0	norm_simple_mlp	False	0.05	10000000	0	True	ContinuousGridworld/150_15_0_none	none		0.05
ContinuousGridworld/151_15_1	slugs_centralized	shields/general_shield_radius	True	-10	False	ContinuousGridWorld	SUNY	-10	False	False	Individual_Deep_Q	1.0	norm_simple_mlp	False	0.05	10000000	1	True	ContinuousGridworld/151_15_1_slugs_centralized	slugs_centralized	shields/general_shield_radius	0.05
ContinuousGridworld/151_15_1	slugs_centralized	shields/general_shield_radius	True	-10	False	ContinuousGridWorld	SUNY	-10	False	False	Individual_Deep_Q	1.0	norm_simple_mlp	False	0.05	10000000	1	True	ContinuousGridworld/151_15_1_slugs_decentralized	slugs_decentralized	shields/general_shield_radius	0.05
ContinuousGridworld/151_15_1	slugs_centralized	shields/general_shield_radius	True	-10	False	ContinuousGridWorld	SUNY	-10	False	False	Individual_Deep_Q	1.0	norm_simple_mlp	False	0.05	10000000	1	True	ContinuousGridworld/151_15_1_none	none		0.05
ContinuousGridworld/152_15_2	slugs_centralized	shields/general_shield_radius	True	-10	False	ContinuousGridWorld	SUNY	-10	False	False	Individual_Deep_Q	1.0	norm_simple_mlp	False	0.05	10000000	2	True	ContinuousGridworld/152_15_2_slugs_centralized	slugs_centralized	shields/general_shield_radius	0.05
ContinuousGridworld/152_15_2	slugs_centralized	shields/general_shield_radius	True	-10	False	ContinuousGridWorld	SUNY	-10	False	False	Individual_Deep_Q	1.0	norm_simple_mlp	False	0.05	10000000	2	True	ContinuousGridworld/152_15_2_slugs_decentralized	slugs_decentralized	shields/general_shield_radius	0.05
ContinuousGridworld/152_15_2	slugs_centralized	shields/general_shield_radius	True	-10	False	ContinuousGridWorld	SUNY	-10	False	False	Individual_Deep_Q	1.0	norm_simple_mlp	False	0.05	10000000	2	True	ContinuousGridworld/152_15_2_none	none		0.05
ContinuousGridworld/153_15_3	slugs_centralized	shields/general_shield_radius	True	-10	False	ContinuousGridWorld	SUNY	-10	False	False	Individual_Deep_Q	1.0	norm_simple_mlp	False	0.05	10000000	3	True	ContinuousGridworld/153_15_3_slugs_centralized	slugs_centralized	shields/general_shield_radius	0.05
ContinuousGridworld/153_15_3	slugs_centralized	shields/general_shield_radius	True	-10	False	ContinuousGridWorld	SUNY	-10	False	False	Individual_Deep_Q	1.0	norm_simple_mlp	False	0.05	10000000	3	True	ContinuousGridworld/153_15_3_slugs_decentralized	slugs_decentralized	shields/general_shield_radius	0.05
ContinuousGridworld/153_15_3	slugs_centralized	shields/general_shield_radius	True	-10	False	ContinuousGridWorld	SUNY	-10	False	False	Individual_Deep_Q	1.0	norm_simple_mlp	False	0.05	10000000	3	True	ContinuousGridworld/153_15_3_none	none		0.05
ContinuousGridworld/154_15_4	slugs_centralized	shields/general_shield_radius	True	-10	False	ContinuousGridWorld	SUNY	-10	False	False	Individual_Deep_Q	1.0	norm_simple_mlp	False	0.05	10000000	4	True	ContinuousGridworld/154_15_4_slugs_centralized	slugs_centralized	shields/general_shield_radius	0.05
ContinuousGridworld/154_15_4	slugs_centralized	shields/general_shield_radius	True	-10	False	ContinuousGridWorld	SUNY	-10	False	False	Individual_Deep_Q	1.0	norm_simple_mlp	False	0.05	10000000	4	True	ContinuousGridworld/154_15_4_slugs_decentralized	slugs_decentralized	shields/general_shield_radius	0.05
ContinuousGridworld/154_15_4	slugs_centralized	shields/general_shield_radius	True	-10	False	ContinuousGridWorld	SUNY	-10	False	False	Individual_Deep_Q	1.0	norm_simple_mlp	False	0.05	10000000	4	True	ContinuousGridworld/154_15_4_none	none		0.05
ContinuousGridworld/155_15_5	slugs_centralized	shields/general_shield_radius	True	-10	False	ContinuousGridWorld	SUNY	-10	False	False	Individual_Deep_Q	1.0	norm_simple_mlp	False	0.05	10000000	5	True	ContinuousGridworld/155_15_5_slugs_centralized	slugs_centralized	shields/general_shield_radius	0.05
ContinuousGridworld/155_15_5	slugs_centralized	shields/general_shield_radius	True	-10	False	ContinuousGridWorld	SUNY	-10	False	False	Individual_Deep_Q	1.0	norm_simple_mlp	False	0.05	10000000	5	True	ContinuousGridworld/155_15_5_slugs_decentralized	slugs_decentralized	shields/general_shield_radius	0.05
ContinuousGridworld/155_15_5	slugs_centralized	shields/general_shield_radius	True	-10	False	ContinuousGridWorld	SUNY	-10	False	False	Individual_Deep_Q	1.0	norm_simple_mlp	False	0.05	10000000	5	True	ContinuousGridworld/155_15_5_none	none		0.05
ContinuousGridworld/156_15_6	slugs_centralized	shields/general_shield_radius	True	-10	False	ContinuousGridWorld	SUNY	-10	False	False	Individual_Deep_Q	1.0	norm_simple_mlp	False	0.05	10000000	6	True	ContinuousGridworld/156_15_6_slugs_centralized	slugs_centralized	shields/general_shield_radius	0.05
ContinuousGridworld/156_15_6	slugs_centralized	shields/general_shield_radius	True	-10	False	ContinuousGridWorld	SUNY	-10	False	False	Individual_Deep_Q	1.0	norm_simple_mlp	False	0.05	10000000	6	True	ContinuousGridworld/156_15_6_slugs_decentralized	slugs_decentralized	shields/general_shield_radius	0.05
ContinuousGridworld/156_15_6	slugs_centralized	shields/general_shield_radius	True	-10	False	ContinuousGridWorld	SUNY	-10	False	False	Individual_Deep_Q	1.0	norm_simple_mlp	False	0.05	10000000	6	True	ContinuousGridworld/156_15_6_none	none		0.05
ContinuousGridworld/157_15_7	slugs_centralized	shields/general_shield_radius	True	-10	False	ContinuousGridWorld	SUNY	-10	False	False	Individual_Deep_Q	1.0	norm_simple_mlp	False	0.05	10000000	7	True	ContinuousGridworld/157_15_7_slugs_centralized	slugs_centralized	shields/general_shield_radius	0.05
ContinuousGridworld/157_15_7	slugs_centralized	shields/general_shield_radius	True	-10	False	ContinuousGridWorld	SUNY	-10	False	False	Individual_Deep_Q	1.0	norm_simple_mlp	False	0.05	10000000	7	True	ContinuousGridworld/157_15_7_slugs_decentralized	slugs_decentralized	shields/general_shield_radius	0.05
ContinuousGridworld/157_15_7	slugs_centralized	shields/general_shield_radius	True	-10	False	ContinuousGridWorld	SUNY	-10	False	False	Individual_Deep_Q	1.0	norm_simple_mlp	False	0.05	10000000	7	True	ContinuousGridworld/157_15_7_none	none		0.05
ContinuousGridworld/158_15_8	slugs_centralized	shields/general_shield_radius	True	-10	False	ContinuousGridWorld	SUNY	-10	False	False	Individual_Deep_Q	1.0	norm_simple_mlp	False	0.05	10000000	8	True	ContinuousGridworld/158_15_8_slugs_centralized	slugs_centralized	shields/general_shield_radius	0.05
ContinuousGridworld/158_15_8	slugs_centralized	shields/general_shield_radius	True	-10	False	ContinuousGridWorld	SUNY	-10	False	False	Individual_Deep_Q	1.0	norm_simple_mlp	False	0.05	10000000	8	True	ContinuousGridworld/158_15_8_slugs_decentralized	slugs_decentralized	shields/general_shield_radius	0.05
ContinuousGridworld/158_15_8	slugs_centralized	shields/general_shield_radius	True	-10	False	ContinuousGridWorld	SUNY	-10	False	False	Individual_Deep_Q	1.0	norm_simple_mlp	False	0.05	10000000	8	True	ContinuousGridworld/158_15_8_none	none		0.05
ContinuousGridworld/159_15_9	slugs_centralized	shields/general_shield_radius	True	-10	False	ContinuousGridWorld	SUNY	-10	False	False	Individual_Deep_Q	1.0	norm_simple_mlp	False	0.05	10000000	9	True	ContinuousGridworld/159_15_9_slugs_centralized	slugs_centralized	shields/general_shield_radius	0.05
ContinuousGridworld/159_15_9	slugs_centralized	shields/general_shield_radius	True	-10	False	ContinuousGridWorld	SUNY	-10	False	False	Individual_Deep_Q	1.0	norm_simple_mlp	False	0.05	10000000	9	True	ContinuousGridworld/159_15_9_slugs_decentralized	slugs_decentralized	shields/general_shield_radius	0.05
ContinuousGridworld/159_15_9	slugs_centralized	shields/general_shield_radius	True	-10	False	ContinuousGridWorld	SUNY	-10	False	False	Individual_Deep_Q	1.0	norm_simple_mlp	False	0.05	10000000	9	True	ContinuousGridworld/159_15_9_none	none		0.05
ContinuousGridworld/160_16_0	slugs_decentralized	shields/general_shield_radius	True	-10	False	ContinuousGridWorld	SUNY	-10	False	False	Individual_Deep_Q	1.0	norm_simple_mlp	False	0.05	10000000	0	True	ContinuousGridworld/160_16_0_slugs_centralized	slugs_centralized	shields/general_shield_radius	0.05
ContinuousGridworld/160_16_0	slugs_decentralized	shields/general_shield_radius	True	-10	False	ContinuousGridWorld	SUNY	-10	False	False	Individual_Deep_Q	1.0	norm_simple_mlp	False	0.05	10000000	0	True	ContinuousGridworld/160_16_0_slugs_decentralized	slugs_decentralized	shields/general_shield_radius	0.05
ContinuousGridworld/160_16_0	slugs_decentralized	shields/general_shield_radius	True	-10	False	ContinuousGridWorld	SUNY	-10	False	False	Individual_Deep_Q	1.0	norm_simple_mlp	False	0.05	10000000	0	True	ContinuousGridworld/160_16_0_none	none		0.05
ContinuousGridworld/161_16_1	slugs_decentralized	shields/general_shield_radius	True	-10	False	ContinuousGridWorld	SUNY	-10	False	False	Individual_Deep_Q	1.0	norm_simple_mlp	False	0.05	10000000	1	True	ContinuousGridworld/161_16_1_slugs_centralized	slugs_centralized	shields/general_shield_radius	0.05
ContinuousGridworld/161_16_1	slugs_decentralized	shields/general_shield_radius	True	-10	False	ContinuousGridWorld	SUNY	-10	False	False	Individual_Deep_Q	1.0	norm_simple_mlp	False	0.05	10000000	1	True	ContinuousGridworld/161_16_1_slugs_decentralized	slugs_decentralized	shields/general_shield_radius	0.05
ContinuousGridworld/161_16_1	slugs_decentralized	shields/general_shield_radius	True	-10	False	ContinuousGridWorld	SUNY	-10	False	False	Individual_Deep_Q	1.0	norm_simple_mlp	False	0.05	10000000	1	True	ContinuousGridworld/161_16_1_none	none		0.05
ContinuousGridworld/162_16_2	slugs_decentralized	shields/general_shield_radius	True	-10	False	ContinuousGridWorld	SUNY	-10	False	False	Individual_Deep_Q	1.0	norm_simple_mlp	False	0.05	10000000	2	True	ContinuousGridworld/162_16_2_slugs_centralized	slugs_centralized	shields/general_shield_radius	0.05
ContinuousGridworld/162_16_2	slugs_decentralized	shields/general_shield_radius	True	-10	False	ContinuousGridWorld	SUNY	-10	False	False	Individual_Deep_Q	1.0	norm_simple_mlp	False	0.05	10000000	2	True	ContinuousGridworld/162_16_2_slugs_decentralized	slugs_decentralized	shields/general_shield_radius	0.05
ContinuousGridworld/162_16_2	slugs_decentralized	shields/general_shield_radius	True	-10	False	ContinuousGridWorld	SUNY	-10	False	False	Individual_Deep_Q	1.0	norm_simple_mlp	False	0.05	10000000	2	True	ContinuousGridworld/162_16_2_none	none		0.05
ContinuousGridworld/163_16_3	slugs_decentralized	shields/general_shield_radius	True	-10	False	ContinuousGridWorld	SUNY	-10	False	False	Individual_Deep_Q	1.0	norm_simple_mlp	False	0.05	10000000	3	True	ContinuousGridworld/163_16_3_slugs_centralized	slugs_centralized	shields/general_shield_radius	0.05
ContinuousGridworld/163_16_3	slugs_decentralized	shields/general_shield_radius	True	-10	False	ContinuousGridWorld	SUNY	-10	False	False	Individual_Deep_Q	1.0	norm_simple_mlp	False	0.05	10000000	3	True	ContinuousGridworld/163_16_3_slugs_decentralized	slugs_decentralized	shields/general_shield_radius	0.05
ContinuousGridworld/163_16_3	slugs_decentralized	shields/general_shield_radius	True	-10	False	ContinuousGridWorld	SUNY	-10	False	False	Individual_Deep_Q	1.0	norm_simple_mlp	False	0.05	10000000	3	True	ContinuousGridworld/163_16_3_none	none		0.05
ContinuousGridworld/164_16_4	slugs_decentralized	shields/general_shield_radius	True	-10	False	ContinuousGridWorld	SUNY	-10	False	False	Individual_Deep_Q	1.0	norm_simple_mlp	False	0.05	10000000	4	True	ContinuousGridworld/164_16_4_slugs_centralized	slugs_centralized	shields/general_shield_radius	0.05
ContinuousGridworld/164_16_4	slugs_decentralized	shields/general_shield_radius	True	-10	False	ContinuousGridWorld	SUNY	-10	False	False	Individual_Deep_Q	1.0	norm_simple_mlp	False	0.05	10000000	4	True	ContinuousGridworld/164_16_4_slugs_decentralized	slugs_decentralized	shields/general_shield_radius	0.05
ContinuousGridworld/164_16_4	slugs_decentralized	shields/general_shield_radius	True	-10	False	ContinuousGridWorld	SUNY	-10	False	False	Individual_Deep_Q	1.0	norm_simple_mlp	False	0.05	10000000	4	True	ContinuousGridworld/164_16_4_none	none		0.05
ContinuousGridworld/165_16_5	slugs_decentralized	shields/general_shield_radius	True	-10	False	ContinuousGridWorld	SUNY	-10	False	False	Individual_Deep_Q	1.0	norm_simple_mlp	False	0.05	10000000	5	True	ContinuousGridworld/165_16_5_slugs_centralized	slugs_centralized	shields/general_shield_radius	0.05
ContinuousGridworld/165_16_5	slugs_decentralized	shields/general_shield_radius	True	-10	False	ContinuousGridWorld	SUNY	-10	False	False	Individual_Deep_Q	1.0	norm_simple_mlp	False	0.05	10000000	5	True	ContinuousGridworld/165_16_5_slugs_decentralized	slugs_decentralized	shields/general_shield_radius	0.05
ContinuousGridworld/165_16_5	slugs_decentralized	shields/general_shield_radius	True	-10	False	ContinuousGridWorld	SUNY	-10	False	False	Individual_Deep_Q	1.0	norm_simple_mlp	False	0.05	10000000	5	True	ContinuousGridworld/165_16_5_none	none		0.05
ContinuousGridworld/166_16_6	slugs_decentralized	shields/general_shield_radius	True	-10	False	ContinuousGridWorld	SUNY	-10	False	False	Individual_Deep_Q	1.0	norm_simple_mlp	False	0.05	10000000	6	True	ContinuousGridworld/166_16_6_slugs_centralized	slugs_centralized	shields/general_shield_radius	0.05
ContinuousGridworld/166_16_6	slugs_decentralized	shields/general_shield_radius	True	-10	False	ContinuousGridWorld	SUNY	-10	False	False	Individual_Deep_Q	1.0	norm_simple_mlp	False	0.05	10000000	6	True	ContinuousGridworld/166_16_6_slugs_decentralized	slugs_decentralized	shields/general_shield_radius	0.05
ContinuousGridworld/166_16_6	slugs_decentralized	shields/general_shield_radius	True	-10	False	ContinuousGridWorld	SUNY	-10	False	False	Individual_Deep_Q	1.0	norm_simple_mlp	False	0.05	10000000	6	True	ContinuousGridworld/166_16_6_none	none		0.05
ContinuousGridworld/167_16_7	slugs_decentralized	shields/general_shield_radius	True	-10	False	ContinuousGridWorld	SUNY	-10	False	False	Individual_Deep_Q	1.0	norm_simple_mlp	False	0.05	10000000	7	True	ContinuousGridworld/167_16_7_slugs_centralized	slugs_centralized	shields/general_shield_radius	0.05
ContinuousGridworld/167_16_7	slugs_decentralized	shields/general_shield_radius	True	-10	False	ContinuousGridWorld	SUNY	-10	False	False	Individual_Deep_Q	1.0	norm_simple_mlp	False	0.05	10000000	7	True	ContinuousGridworld/167_16_7_slugs_decentralized	slugs_decentralized	shields/general_shield_radius	0.05
ContinuousGridworld/167_16_7	slugs_decentralized	shields/general_shield_radius	True	-10	False	ContinuousGridWorld	SUNY	-10	False	False	Individual_Deep_Q	1.0	norm_simple_mlp	False	0.05	10000000	7	True	ContinuousGridworld/167_16_7_none	none		0.05
ContinuousGridworld/168_16_8	slugs_decentralized	shields/general_shield_radius	True	-10	False	ContinuousGridWorld	SUNY	-10	False	False	Individual_Deep_Q	1.0	norm_simple_mlp	False	0.05	10000000	8	True	ContinuousGridworld/168_16_8_slugs_centralized	slugs_centralized	shields/general_shield_radius	0.05
ContinuousGridworld/168_16_8	slugs_decentralized	shields/general_shield_radius	True	-10	False	ContinuousGridWorld	SUNY	-10	False	False	Individual_Deep_Q	1.0	norm_simple_mlp	False	0.05	10000000	8	True	ContinuousGridworld/168_16_8_slugs_decentralized	slugs_decentralized	shields/general_shield_radius	0.05
ContinuousGridworld/168_16_8	slugs_decentralized	shields/general_shield_radius	True	-10	False	ContinuousGridWorld	SUNY	-10	False	False	Individual_Deep_Q	1.0	norm_simple_mlp	False	0.05	10000000	8	True	ContinuousGridworld/168_16_8_none	none		0.05
ContinuousGridworld/169_16_9	slugs_decentralized	shields/general_shield_radius	True	-10	False	ContinuousGridWorld	SUNY	-10	False	False	Individual_Deep_Q	1.0	norm_simple_mlp	False	0.05	10000000	9	True	ContinuousGridworld/169_16_9_slugs_centralized	slugs_centralized	shields/general_shield_radius	0.05
ContinuousGridworld/169_16_9	slugs_decentralized	shields/general_shield_radius	True	-10	False	ContinuousGridWorld	SUNY	-10	False	False	Individual_Deep_Q	1.0	norm_simple_mlp	False	0.05	10000000	9	True	ContinuousGridworld/169_16_9_slugs_decentralized	slugs_decentralized	shields/general_shield_radius	0.05
ContinuousGridworld/169_16_9	slugs_decentralized	shields/general_shield_radius	True	-10	False	ContinuousGridWorld	SUNY	-10	False	False	Individual_Deep_Q	1.0	norm_simple_mlp	False	0.05	10000000	9	True	ContinuousGridworld/169_16_9_none	none		0.05
ContinuousGridworld/170_17_0	none		True	-10	False	ContinuousGridWorld	SUNY	-10	False	False	Individual_Deep_Q	1.0	norm_simple_mlp	False	0.05	10000000	0	True	ContinuousGridworld/170_17_0_slugs_centralized	slugs_centralized	shields/general_shield_radius	0.05
ContinuousGridworld/170_17_0	none		True	-10	False	ContinuousGridWorld	SUNY	-10	False	False	Individual_Deep_Q	1.0	norm_simple_mlp	False	0.05	10000000	0	True	ContinuousGridworld/170_17_0_slugs_decentralized	slugs_decentralized	shields/general_shield_radius	0.05
ContinuousGridworld/170_17_0	none		True	-10	False	ContinuousGridWorld	SUNY	-10	False	False	Individual_Deep_Q	1.0	norm_simple_mlp	False	0.05	10000000	0	True	ContinuousGridworld/170_17_0_none	none		0.05
ContinuousGridworld/171_17_1	none		True	-10	False	ContinuousGridWorld	SUNY	-10	False	False	Individual_Deep_Q	1.0	norm_simple_mlp	False	0.05	10000000	1	True	ContinuousGridworld/171_17_1_slugs_centralized	slugs_centralized	shields/general_shield_radius	0.05
ContinuousGridworld/171_17_1	none		True	-10	False	ContinuousGridWorld	SUNY	-10	False	False	Individual_Deep_Q	1.0	norm_simple_mlp	False	0.05	10000000	1	True	ContinuousGridworld/171_17_1_slugs_decentralized	slugs_decentralized	shields/general_shield_radius	0.05
ContinuousGridworld/171_17_1	none		True	-10	False	ContinuousGridWorld	SUNY	-10	False	False	Individual_Deep_Q	1.0	norm_simple_mlp	False	0.05	10000000	1	True	ContinuousGridworld/171_17_1_none	none		0.05
ContinuousGridworld/172_17_2	none		True	-10	False	ContinuousGridWorld	SUNY	-10	False	False	Individual_Deep_Q	1.0	norm_simple_mlp	False	0.05	10000000	2	True	ContinuousGridworld/172_17_2_slugs_centralized	slugs_centralized	shields/general_shield_radius	0.05
ContinuousGridworld/172_17_2	none		True	-10	False	ContinuousGridWorld	SUNY	-10	False	False	Individual_Deep_Q	1.0	norm_simple_mlp	False	0.05	10000000	2	True	ContinuousGridworld/172_17_2_slugs_decentralized	slugs_decentralized	shields/general_shield_radius	0.05
ContinuousGridworld/172_17_2	none		True	-10	False	ContinuousGridWorld	SUNY	-10	False	False	Individual_Deep_Q	1.0	norm_simple_mlp	False	0.05	10000000	2	True	ContinuousGridworld/172_17_2_none	none		0.05
ContinuousGridworld/173_17_3	none		True	-10	False	ContinuousGridWorld	SUNY	-10	False	False	Individual_Deep_Q	1.0	norm_simple_mlp	False	0.05	10000000	3	True	ContinuousGridworld/173_17_3_slugs_centralized	slugs_centralized	shields/general_shield_radius	0.05
ContinuousGridworld/173_17_3	none		True	-10	False	ContinuousGridWorld	SUNY	-10	False	False	Individual_Deep_Q	1.0	norm_simple_mlp	False	0.05	10000000	3	True	ContinuousGridworld/173_17_3_slugs_decentralized	slugs_decentralized	shields/general_shield_radius	0.05
ContinuousGridworld/173_17_3	none		True	-10	False	ContinuousGridWorld	SUNY	-10	False	False	Individual_Deep_Q	1.0	norm_simple_mlp	False	0.05	10000000	3	True	ContinuousGridworld/173_17_3_none	none		0.05
ContinuousGridworld/174_17_4	none		True	-10	False	ContinuousGridWorld	SUNY	-10	False	False	Individual_Deep_Q	1.0	norm_simple_mlp	False	0.05	10000000	4	True	ContinuousGridworld/174_17_4_slugs_centralized	slugs_centralized	shields/general_shield_radius	0.05
ContinuousGridworld/174_17_4	none		True	-10	False	ContinuousGridWorld	SUNY	-10	False	False	Individual_Deep_Q	1.0	norm_simple_mlp	False	0.05	10000000	4	True	ContinuousGridworld/174_17_4_slugs_decentralized	slugs_decentralized	shields/general_shield_radius	0.05
ContinuousGridworld/174_17_4	none		True	-10	False	ContinuousGridWorld	SUNY	-10	False	False	Individual_Deep_Q	1.0	norm_simple_mlp	False	0.05	10000000	4	True	ContinuousGridworld/174_17_4_none	none		0.05
ContinuousGridworld/175_17_5	none		True	-10	False	ContinuousGridWorld	SUNY	-10	False	False	Individual_Deep_Q	1.0	norm_simple_mlp	False	0.05	10000000	5	True	ContinuousGridworld/175_17_5_slugs_centralized	slugs_centralized	shields/general_shield_radius	0.05
ContinuousGridworld/175_17_5	none		True	-10	False	ContinuousGridWorld	SUNY	-10	False	False	Individual_Deep_Q	1.0	norm_simple_mlp	False	0.05	10000000	5	True	ContinuousGridworld/175_17_5_slugs_decentralized	slugs_decentralized	shields/general_shield_radius	0.05
ContinuousGridworld/175_17_5	none		True	-10	False	ContinuousGridWorld	SUNY	-10	False	False	Individual_Deep_Q	1.0	norm_simple_mlp	False	0.05	10000000	5	True	ContinuousGridworld/175_17_5_none	none		0.05
ContinuousGridworld/176_17_6	none		True	-10	False	ContinuousGridWorld	SUNY	-10	False	False	Individual_Deep_Q	1.0	norm_simple_mlp	False	0.05	10000000	6	True	ContinuousGridworld/176_17_6_slugs_centralized	slugs_centralized	shields/general_shield_radius	0.05
ContinuousGridworld/176_17_6	none		True	-10	False	ContinuousGridWorld	SUNY	-10	False	False	Individual_Deep_Q	1.0	norm_simple_mlp	False	0.05	10000000	6	True	ContinuousGridworld/176_17_6_slugs_decentralized	slugs_decentralized	shields/general_shield_radius	0.05
ContinuousGridworld/176_17_6	none		True	-10	False	ContinuousGridWorld	SUNY	-10	False	False	Individual_Deep_Q	1.0	norm_simple_mlp	False	0.05	10000000	6	True	ContinuousGridworld/176_17_6_none	none		0.05
ContinuousGridworld/177_17_7	none		True	-10	False	ContinuousGridWorld	SUNY	-10	False	False	Individual_Deep_Q	1.0	norm_simple_mlp	False	0.05	10000000	7	True	ContinuousGridworld/177_17_7_slugs_centralized	slugs_centralized	shields/general_shield_radius	0.05
ContinuousGridworld/177_17_7	none		True	-10	False	ContinuousGridWorld	SUNY	-10	False	False	Individual_Deep_Q	1.0	norm_simple_mlp	False	0.05	10000000	7	True	ContinuousGridworld/177_17_7_slugs_decentralized	slugs_decentralized	shields/general_shield_radius	0.05
ContinuousGridworld/177_17_7	none		True	-10	False	ContinuousGridWorld	SUNY	-10	False	False	Individual_Deep_Q	1.0	norm_simple_mlp	False	0.05	10000000	7	True	ContinuousGridworld/177_17_7_none	none		0.05
ContinuousGridworld/178_17_8	none		True	-10	False	ContinuousGridWorld	SUNY	-10	False	False	Individual_Deep_Q	1.0	norm_simple_mlp	False	0.05	10000000	8	True	ContinuousGridworld/178_17_8_slugs_centralized	slugs_centralized	shields/general_shield_radius	0.05
ContinuousGridworld/178_17_8	none		True	-10	False	ContinuousGridWorld	SUNY	-10	False	False	Individual_Deep_Q	1.0	norm_simple_mlp	False	0.05	10000000	8	True	ContinuousGridworld/178_17_8_slugs_decentralized	slugs_decentralized	shields/general_shield_radius	0.05
ContinuousGridworld/178_17_8	none		True	-10	False	ContinuousGridWorld	SUNY	-10	False	False	Individual_Deep_Q	1.0	norm_simple_mlp	False	0.05	10000000	8	True	ContinuousGridworld/178_17_8_none	none		0.05
ContinuousGridworld/179_17_9	none		True	-10	False	ContinuousGridWorld	SUNY	-10	False	False	Individual_Deep_Q	1.0	norm_simple_mlp	False	0.05	10000000	9	True	ContinuousGridworld/179_17_9_slugs_centralized	slugs_centralized	shields/general_shield_radius	0.05
ContinuousGridworld/179_17_9	none		True	-10	False	ContinuousGridWorld	SUNY	-10	False	False	Individual_Deep_Q	1.0	norm_simple_mlp	False	0.05	10000000	9	True	ContinuousGridworld/179_17_9_slugs_decentralized	slugs_decentralized	shields/general_shield_radius	0.05
ContinuousGridworld/179_17_9	none		True	-10	False	ContinuousGridWorld	SUNY	-10	False	False	Individual_Deep_Q	1.0	norm_simple_mlp	False	0.05	10000000	9	True	ContinuousGridworld/179_17_9_none	none		0.05
ContinuousGridworld/180_18_0	slugs_centralized	shields/general_shield_radius	True	-10	True	ContinuousGridWorld	MIT	-10	False	False	Individual_Deep_Q	1.0	norm_simple_mlp	False	0.05	10000000	0	True	ContinuousGridworld/180_18_0_slugs_centralized	slugs_centralized	shields/general_shield_radius	0.05
ContinuousGridworld/180_18_0	slugs_centralized	shields/general_shield_radius	True	-10	True	ContinuousGridWorld	MIT	-10	False	False	Individual_Deep_Q	1.0	norm_simple_mlp	False	0.05	10000000	0	True	ContinuousGridworld/180_18_0_slugs_decentralized	slugs_decentralized	shields/general_shield_radius	0.05
ContinuousGridworld/180_18_0	slugs_centralized	shields/general_shield_radius	True	-10	True	ContinuousGridWorld	MIT	-10	False	False	Individual_Deep_Q	1.0	norm_simple_mlp	False	0.05	10000000	0	True	ContinuousGridworld/180_18_0_none	none		0.05
ContinuousGridworld/181_18_1	slugs_centralized	shields/general_shield_radius	True	-10	True	ContinuousGridWorld	MIT	-10	False	False	Individual_Deep_Q	1.0	norm_simple_mlp	False	0.05	10000000	1	True	ContinuousGridworld/181_18_1_slugs_centralized	slugs_centralized	shields/general_shield_radius	0.05
ContinuousGridworld/181_18_1	slugs_centralized	shields/general_shield_radius	True	-10	True	ContinuousGridWorld	MIT	-10	False	False	Individual_Deep_Q	1.0	norm_simple_mlp	False	0.05	10000000	1	True	ContinuousGridworld/181_18_1_slugs_decentralized	slugs_decentralized	shields/general_shield_radius	0.05
ContinuousGridworld/181_18_1	slugs_centralized	shields/general_shield_radius	True	-10	True	ContinuousGridWorld	MIT	-10	False	False	Individual_Deep_Q	1.0	norm_simple_mlp	False	0.05	10000000	1	True	ContinuousGridworld/181_18_1_none	none		0.05
ContinuousGridworld/182_18_2	slugs_centralized	shields/general_shield_radius	True	-10	True	ContinuousGridWorld	MIT	-10	False	False	Individual_Deep_Q	1.0	norm_simple_mlp	False	0.05	10000000	2	True	ContinuousGridworld/182_18_2_slugs_centralized	slugs_centralized	shields/general_shield_radius	0.05
ContinuousGridworld/182_18_2	slugs_centralized	shields/general_shield_radius	True	-10	True	ContinuousGridWorld	MIT	-10	False	False	Individual_Deep_Q	1.0	norm_simple_mlp	False	0.05	10000000	2	True	ContinuousGridworld/182_18_2_slugs_decentralized	slugs_decentralized	shields/general_shield_radius	0.05
ContinuousGridworld/182_18_2	slugs_centralized	shields/general_shield_radius	True	-10	True	ContinuousGridWorld	MIT	-10	False	False	Individual_Deep_Q	1.0	norm_simple_mlp	False	0.05	10000000	2	True	ContinuousGridworld/182_18_2_none	none		0.05
ContinuousGridworld/183_18_3	slugs_centralized	shields/general_shield_radius	True	-10	True	ContinuousGridWorld	MIT	-10	False	False	Individual_Deep_Q	1.0	norm_simple_mlp	False	0.05	10000000	3	True	ContinuousGridworld/183_18_3_slugs_centralized	slugs_centralized	shields/general_shield_radius	0.05
ContinuousGridworld/183_18_3	slugs_centralized	shields/general_shield_radius	True	-10	True	ContinuousGridWorld	MIT	-10	False	False	Individual_Deep_Q	1.0	norm_simple_mlp	False	0.05	10000000	3	True	ContinuousGridworld/183_18_3_slugs_decentralized	slugs_decentralized	shields/general_shield_radius	0.05
ContinuousGridworld/183_18_3	slugs_centralized	shields/general_shield_radius	True	-10	True	ContinuousGridWorld	MIT	-10	False	False	Individual_Deep_Q	1.0	norm_simple_mlp	False	0.05	10000000	3	True	ContinuousGridworld/183_18_3_none	none		0.05
ContinuousGridworld/184_18_4	slugs_centralized	shields/general_shield_radius	True	-10	True	ContinuousGridWorld	MIT	-10	False	False	Individual_Deep_Q	1.0	norm_simple_mlp	False	0.05	10000000	4	True	ContinuousGridworld/184_18_4_slugs_centralized	slugs_centralized	shields/general_shield_radius	0.05
ContinuousGridworld/184_18_4	slugs_centralized	shields/general_shield_radius	True	-10	True	ContinuousGridWorld	MIT	-10	False	False	Individual_Deep_Q	1.0	norm_simple_mlp	False	0.05	10000000	4	True	ContinuousGridworld/184_18_4_slugs_decentralized	slugs_decentralized	shields/general_shield_radius	0.05
ContinuousGridworld/184_18_4	slugs_centralized	shields/general_shield_radius	True	-10	True	ContinuousGridWorld	MIT	-10	False	False	Individual_Deep_Q	1.0	norm_simple_mlp	False	0.05	10000000	4	True	ContinuousGridworld/184_18_4_none	none		0.05
ContinuousGridworld/185_18_5	slugs_centralized	shields/general_shield_radius	True	-10	True	ContinuousGridWorld	MIT	-10	False	False	Individual_Deep_Q	1.0	norm_simple_mlp	False	0.05	10000000	5	True	ContinuousGridworld/185_18_5_slugs_centralized	slugs_centralized	shields/general_shield_radius	0.05
ContinuousGridworld/185_18_5	slugs_centralized	shields/general_shield_radius	True	-10	True	ContinuousGridWorld	MIT	-10	False	False	Individual_Deep_Q	1.0	norm_simple_mlp	False	0.05	10000000	5	True	ContinuousGridworld/185_18_5_slugs_decentralized	slugs_decentralized	shields/general_shield_radius	0.05
ContinuousGridworld/185_18_5	slugs_centralized	shields/general_shield_radius	True	-10	True	ContinuousGridWorld	MIT	-10	False	False	Individual_Deep_Q	1.0	norm_simple_mlp	False	0.05	10000000	5	True	ContinuousGridworld/185_18_5_none	none		0.05
ContinuousGridworld/186_18_6	slugs_centralized	shields/general_shield_radius	True	-10	True	ContinuousGridWorld	MIT	-10	False	False	Individual_Deep_Q	1.0	norm_simple_mlp	False	0.05	10000000	6	True	ContinuousGridworld/186_18_6_slugs_centralized	slugs_centralized	shields/general_shield_radius	0.05
ContinuousGridworld/186_18_6	slugs_centralized	shields/general_shield_radius	True	-10	True	ContinuousGridWorld	MIT	-10	False	False	Individual_Deep_Q	1.0	norm_simple_mlp	False	0.05	10000000	6	True	ContinuousGridworld/186_18_6_slugs_decentralized	slugs_decentralized	shields/general_shield_radius	0.05
ContinuousGridworld/186_18_6	slugs_centralized	shields/general_shield_radius	True	-10	True	ContinuousGridWorld	MIT	-10	False	False	Individual_Deep_Q	1.0	norm_simple_mlp	False	0.05	10000000	6	True	ContinuousGridworld/186_18_6_none	none		0.05
ContinuousGridworld/187_18_7	slugs_centralized	shields/general_shield_radius	True	-10	True	ContinuousGridWorld	MIT	-10	False	False	Individual_Deep_Q	1.0	norm_simple_mlp	False	0.05	10000000	7	True	ContinuousGridworld/187_18_7_slugs_centralized	slugs_centralized	shields/general_shield_radius	0.05
ContinuousGridworld/187_18_7	slugs_centralized	shields/general_shield_radius	True	-10	True	ContinuousGridWorld	MIT	-10	False	False	Individual_Deep_Q	1.0	norm_simple_mlp	False	0.05	10000000	7	True	ContinuousGridworld/187_18_7_slugs_decentralized	slugs_decentralized	shields/general_shield_radius	0.05
ContinuousGridworld/187_18_7	slugs_centralized	shields/general_shield_radius	True	-10	True	ContinuousGridWorld	MIT	-10	False	False	Individual_Deep_Q	1.0	norm_simple_mlp	False	0.05	10000000	7	True	ContinuousGridworld/187_18_7_none	none		0.05
ContinuousGridworld/188_18_8	slugs_centralized	shields/general_shield_radius	True	-10	True	ContinuousGridWorld	MIT	-10	False	False	Individual_Deep_Q	1.0	norm_simple_mlp	False	0.05	10000000	8	True	ContinuousGridworld/188_18_8_slugs_centralized	slugs_centralized	shields/general_shield_radius	0.05
ContinuousGridworld/188_18_8	slugs_centralized	shields/general_shield_radius	True	-10	True	ContinuousGridWorld	MIT	-10	False	False	Individual_Deep_Q	1.0	norm_simple_mlp	False	0.05	10000000	8	True	ContinuousGridworld/188_18_8_slugs_decentralized	slugs_decentralized	shields/general_shield_radius	0.05
ContinuousGridworld/188_18_8	slugs_centralized	shields/general_shield_radius	True	-10	True	ContinuousGridWorld	MIT	-10	False	False	Individual_Deep_Q	1.0	norm_simple_mlp	False	0.05	10000000	8	True	ContinuousGridworld/188_18_8_none	none		0.05
ContinuousGridworld/189_18_9	slugs_centralized	shields/general_shield_radius	True	-10	True	ContinuousGridWorld	MIT	-10	False	False	Individual_Deep_Q	1.0	norm_simple_mlp	False	0.05	10000000	9	True	ContinuousGridworld/189_18_9_slugs_centralized	slugs_centralized	shields/general_shield_radius	0.05
ContinuousGridworld/189_18_9	slugs_centralized	shields/general_shield_radius	True	-10	True	ContinuousGridWorld	MIT	-10	False	False	Individual_Deep_Q	1.0	norm_simple_mlp	False	0.05	10000000	9	True	ContinuousGridworld/189_18_9_slugs_decentralized	slugs_decentralized	shields/general_shield_radius	0.05
ContinuousGridworld/189_18_9	slugs_centralized	shields/general_shield_radius	True	-10	True	ContinuousGridWorld	MIT	-10	False	False	Individual_Deep_Q	1.0	norm_simple_mlp	False	0.05	10000000	9	True	ContinuousGridworld/189_18_9_none	none		0.05
ContinuousGridworld/190_19_0	slugs_decentralized	shields/general_shield_radius	True	-10	True	ContinuousGridWorld	MIT	-10	False	False	Individual_Deep_Q	1.0	norm_simple_mlp	False	0.05	10000000	0	True	ContinuousGridworld/190_19_0_slugs_centralized	slugs_centralized	shields/general_shield_radius	0.05
ContinuousGridworld/190_19_0	slugs_decentralized	shields/general_shield_radius	True	-10	True	ContinuousGridWorld	MIT	-10	False	False	Individual_Deep_Q	1.0	norm_simple_mlp	False	0.05	10000000	0	True	ContinuousGridworld/190_19_0_slugs_decentralized	slugs_decentralized	shields/general_shield_radius	0.05
ContinuousGridworld/190_19_0	slugs_decentralized	shields/general_shield_radius	True	-10	True	ContinuousGridWorld	MIT	-10	False	False	Individual_Deep_Q	1.0	norm_simple_mlp	False	0.05	10000000	0	True	ContinuousGridworld/190_19_0_none	none		0.05
ContinuousGridworld/191_19_1	slugs_decentralized	shields/general_shield_radius	True	-10	True	ContinuousGridWorld	MIT	-10	False	False	Individual_Deep_Q	1.0	norm_simple_mlp	False	0.05	10000000	1	True	ContinuousGridworld/191_19_1_slugs_centralized	slugs_centralized	shields/general_shield_radius	0.05
ContinuousGridworld/191_19_1	slugs_decentralized	shields/general_shield_radius	True	-10	True	ContinuousGridWorld	MIT	-10	False	False	Individual_Deep_Q	1.0	norm_simple_mlp	False	0.05	10000000	1	True	ContinuousGridworld/191_19_1_slugs_decentralized	slugs_decentralized	shields/general_shield_radius	0.05
ContinuousGridworld/191_19_1	slugs_decentralized	shields/general_shield_radius	True	-10	True	ContinuousGridWorld	MIT	-10	False	False	Individual_Deep_Q	1.0	norm_simple_mlp	False	0.05	10000000	1	True	ContinuousGridworld/191_19_1_none	none		0.05
ContinuousGridworld/192_19_2	slugs_decentralized	shields/general_shield_radius	True	-10	True	ContinuousGridWorld	MIT	-10	False	False	Individual_Deep_Q	1.0	norm_simple_mlp	False	0.05	10000000	2	True	ContinuousGridworld/192_19_2_slugs_centralized	slugs_centralized	shields/general_shield_radius	0.05
ContinuousGridworld/192_19_2	slugs_decentralized	shields/general_shield_radius	True	-10	True	ContinuousGridWorld	MIT	-10	False	False	Individual_Deep_Q	1.0	norm_simple_mlp	False	0.05	10000000	2	True	ContinuousGridworld/192_19_2_slugs_decentralized	slugs_decentralized	shields/general_shield_radius	0.05
ContinuousGridworld/192_19_2	slugs_decentralized	shields/general_shield_radius	True	-10	True	ContinuousGridWorld	MIT	-10	False	False	Individual_Deep_Q	1.0	norm_simple_mlp	False	0.05	10000000	2	True	ContinuousGridworld/192_19_2_none	none		0.05
ContinuousGridworld/193_19_3	slugs_decentralized	shields/general_shield_radius	True	-10	True	ContinuousGridWorld	MIT	-10	False	False	Individual_Deep_Q	1.0	norm_simple_mlp	False	0.05	10000000	3	True	ContinuousGridworld/193_19_3_slugs_centralized	slugs_centralized	shields/general_shield_radius	0.05
ContinuousGridworld/193_19_3	slugs_decentralized	shields/general_shield_radius	True	-10	True	ContinuousGridWorld	MIT	-10	False	False	Individual_Deep_Q	1.0	norm_simple_mlp	False	0.05	10000000	3	True	ContinuousGridworld/193_19_3_slugs_decentralized	slugs_decentralized	shields/general_shield_radius	0.05
ContinuousGridworld/193_19_3	slugs_decentralized	shields/general_shield_radius	True	-10	True	ContinuousGridWorld	MIT	-10	False	False	Individual_Deep_Q	1.0	norm_simple_mlp	False	0.05	10000000	3	True	ContinuousGridworld/193_19_3_none	none		0.05
ContinuousGridworld/194_19_4	slugs_decentralized	shields/general_shield_radius	True	-10	True	ContinuousGridWorld	MIT	-10	False	False	Individual_Deep_Q	1.0	norm_simple_mlp	False	0.05	10000000	4	True	ContinuousGridworld/194_19_4_slugs_centralized	slugs_centralized	shields/general_shield_radius	0.05
ContinuousGridworld/194_19_4	slugs_decentralized	shields/general_shield_radius	True	-10	True	ContinuousGridWorld	MIT	-10	False	False	Individual_Deep_Q	1.0	norm_simple_mlp	False	0.05	10000000	4	True	ContinuousGridworld/194_19_4_slugs_decentralized	slugs_decentralized	shields/general_shield_radius	0.05
ContinuousGridworld/194_19_4	slugs_decentralized	shields/general_shield_radius	True	-10	True	ContinuousGridWorld	MIT	-10	False	False	Individual_Deep_Q	1.0	norm_simple_mlp	False	0.05	10000000	4	True	ContinuousGridworld/194_19_4_none	none		0.05
ContinuousGridworld/195_19_5	slugs_decentralized	shields/general_shield_radius	True	-10	True	ContinuousGridWorld	MIT	-10	False	False	Individual_Deep_Q	1.0	norm_simple_mlp	False	0.05	10000000	5	True	ContinuousGridworld/195_19_5_slugs_centralized	slugs_centralized	shields/general_shield_radius	0.05
ContinuousGridworld/195_19_5	slugs_decentralized	shields/general_shield_radius	True	-10	True	ContinuousGridWorld	MIT	-10	False	False	Individual_Deep_Q	1.0	norm_simple_mlp	False	0.05	10000000	5	True	ContinuousGridworld/195_19_5_slugs_decentralized	slugs_decentralized	shields/general_shield_radius	0.05
ContinuousGridworld/195_19_5	slugs_decentralized	shields/general_shield_radius	True	-10	True	ContinuousGridWorld	MIT	-10	False	False	Individual_Deep_Q	1.0	norm_simple_mlp	False	0.05	10000000	5	True	ContinuousGridworld/195_19_5_none	none		0.05
ContinuousGridworld/196_19_6	slugs_decentralized	shields/general_shield_radius	True	-10	True	ContinuousGridWorld	MIT	-10	False	False	Individual_Deep_Q	1.0	norm_simple_mlp	False	0.05	10000000	6	True	ContinuousGridworld/196_19_6_slugs_centralized	slugs_centralized	shields/general_shield_radius	0.05
ContinuousGridworld/196_19_6	slugs_decentralized	shields/general_shield_radius	True	-10	True	ContinuousGridWorld	MIT	-10	False	False	Individual_Deep_Q	1.0	norm_simple_mlp	False	0.05	10000000	6	True	ContinuousGridworld/196_19_6_slugs_decentralized	slugs_decentralized	shields/general_shield_radius	0.05
ContinuousGridworld/196_19_6	slugs_decentralized	shields/general_shield_radius	True	-10	True	ContinuousGridWorld	MIT	-10	False	False	Individual_Deep_Q	1.0	norm_simple_mlp	False	0.05	10000000	6	True	ContinuousGridworld/196_19_6_none	none		0.05
ContinuousGridworld/197_19_7	slugs_decentralized	shields/general_shield_radius	True	-10	True	ContinuousGridWorld	MIT	-10	False	False	Individual_Deep_Q	1.0	norm_simple_mlp	False	0.05	10000000	7	True	ContinuousGridworld/197_19_7_slugs_centralized	slugs_centralized	shields/general_shield_radius	0.05
ContinuousGridworld/197_19_7	slugs_decentralized	shields/general_shield_radius	True	-10	True	ContinuousGridWorld	MIT	-10	False	False	Individual_Deep_Q	1.0	norm_simple_mlp	False	0.05	10000000	7	True	ContinuousGridworld/197_19_7_slugs_decentralized	slugs_decentralized	shields/general_shield_radius	0.05
ContinuousGridworld/197_19_7	slugs_decentralized	shields/general_shield_radius	True	-10	True	ContinuousGridWorld	MIT	-10	False	False	Individual_Deep_Q	1.0	norm_simple_mlp	False	0.05	10000000	7	True	ContinuousGridworld/197_19_7_none	none		0.05
ContinuousGridworld/198_19_8	slugs_decentralized	shields/general_shield_radius	True	-10	True	ContinuousGridWorld	MIT	-10	False	False	Individual_Deep_Q	1.0	norm_simple_mlp	False	0.05	10000000	8	True	ContinuousGridworld/198_19_8_slugs_centralized	slugs_centralized	shields/general_shield_radius	0.05
ContinuousGridworld/198_19_8	slugs_decentralized	shields/general_shield_radius	True	-10	True	ContinuousGridWorld	MIT	-10	False	False	Individual_Deep_Q	1.0	norm_simple_mlp	False	0.05	10000000	8	True	ContinuousGridworld/198_19_8_slugs_decentralized	slugs_decentralized	shields/general_shield_radius	0.05
ContinuousGridworld/198_19_8	slugs_decentralized	shields/general_shield_radius	True	-10	True	ContinuousGridWorld	MIT	-10	False	False	Individual_Deep_Q	1.0	norm_simple_mlp	False	0.05	10000000	8	True	ContinuousGridworld/198_19_8_none	none		0.05
ContinuousGridworld/199_19_9	slugs_decentralized	shields/general_shield_radius	True	-10	True	ContinuousGridWorld	MIT	-10	False	False	Individual_Deep_Q	1.0	norm_simple_mlp	False	0.05	10000000	9	True	ContinuousGridworld/199_19_9_slugs_centralized	slugs_centralized	shields/general_shield_radius	0.05
ContinuousGridworld/199_19_9	slugs_decentralized	shields/general_shield_radius	True	-10	True	ContinuousGridWorld	MIT	-10	False	False	Individual_Deep_Q	1.0	norm_simple_mlp	False	0.05	10000000	9	True	ContinuousGridworld/199_19_9_slugs_decentralized	slugs_decentralized	shields/general_shield_radius	0.05
ContinuousGridworld/199_19_9	slugs_decentralized	shields/general_shield_radius	True	-10	True	ContinuousGridWorld	MIT	-10	False	False	Individual_Deep_Q	1.0	norm_simple_mlp	False	0.05	10000000	9	True	ContinuousGridworld/199_19_9_none	none		0.05
ContinuousGridworld/200_20_0	none		True	-10	True	ContinuousGridWorld	MIT	-10	False	False	Individual_Deep_Q	1.0	norm_simple_mlp	False	0.05	10000000	0	True	ContinuousGridworld/200_20_0_slugs_centralized	slugs_centralized	shields/general_shield_radius	0.05
ContinuousGridworld/200_20_0	none		True	-10	True	ContinuousGridWorld	MIT	-10	False	False	Individual_Deep_Q	1.0	norm_simple_mlp	False	0.05	10000000	0	True	ContinuousGridworld/200_20_0_slugs_decentralized	slugs_decentralized	shields/general_shield_radius	0.05
ContinuousGridworld/200_20_0	none		True	-10	True	ContinuousGridWorld	MIT	-10	False	False	Individual_Deep_Q	1.0	norm_simple_mlp	False	0.05	10000000	0	True	ContinuousGridworld/200_20_0_none	none		0.05
ContinuousGridworld/201_20_1	none		True	-10	True	ContinuousGridWorld	MIT	-10	False	False	Individual_Deep_Q	1.0	norm_simple_mlp	False	0.05	10000000	1	True	ContinuousGridworld/201_20_1_slugs_centralized	slugs_centralized	shields/general_shield_radius	0.05
ContinuousGridworld/201_20_1	none		True	-10	True	ContinuousGridWorld	MIT	-10	False	False	Individual_Deep_Q	1.0	norm_simple_mlp	False	0.05	10000000	1	True	ContinuousGridworld/201_20_1_slugs_decentralized	slugs_decentralized	shields/general_shield_radius	0.05
ContinuousGridworld/201_20_1	none		True	-10	True	ContinuousGridWorld	MIT	-10	False	False	Individual_Deep_Q	1.0	norm_simple_mlp	False	0.05	10000000	1	True	ContinuousGridworld/201_20_1_none	none		0.05
ContinuousGridworld/202_20_2	none		True	-10	True	ContinuousGridWorld	MIT	-10	False	False	Individual_Deep_Q	1.0	norm_simple_mlp	False	0.05	10000000	2	True	ContinuousGridworld/202_20_2_slugs_centralized	slugs_centralized	shields/general_shield_radius	0.05
ContinuousGridworld/202_20_2	none		True	-10	True	ContinuousGridWorld	MIT	-10	False	False	Individual_Deep_Q	1.0	norm_simple_mlp	False	0.05	10000000	2	True	ContinuousGridworld/202_20_2_slugs_decentralized	slugs_decentralized	shields/general_shield_radius	0.05
ContinuousGridworld/202_20_2	none		True	-10	True	ContinuousGridWorld	MIT	-10	False	False	Individual_Deep_Q	1.0	norm_simple_mlp	False	0.05	10000000	2	True	ContinuousGridworld/202_20_2_none	none		0.05
ContinuousGridworld/203_20_3	none		True	-10	True	ContinuousGridWorld	MIT	-10	False	False	Individual_Deep_Q	1.0	norm_simple_mlp	False	0.05	10000000	3	True	ContinuousGridworld/203_20_3_slugs_centralized	slugs_centralized	shields/general_shield_radius	0.05
ContinuousGridworld/203_20_3	none		True	-10	True	ContinuousGridWorld	MIT	-10	False	False	Individual_Deep_Q	1.0	norm_simple_mlp	False	0.05	10000000	3	True	ContinuousGridworld/203_20_3_slugs_decentralized	slugs_decentralized	shields/general_shield_radius	0.05
ContinuousGridworld/203_20_3	none		True	-10	True	ContinuousGridWorld	MIT	-10	False	False	Individual_Deep_Q	1.0	norm_simple_mlp	False	0.05	10000000	3	True	ContinuousGridworld/203_20_3_none	none		0.05
ContinuousGridworld/204_20_4	none		True	-10	True	ContinuousGridWorld	MIT	-10	False	False	Individual_Deep_Q	1.0	norm_simple_mlp	False	0.05	10000000	4	True	ContinuousGridworld/204_20_4_slugs_centralized	slugs_centralized	shields/general_shield_radius	0.05
ContinuousGridworld/204_20_4	none		True	-10	True	ContinuousGridWorld	MIT	-10	False	False	Individual_Deep_Q	1.0	norm_simple_mlp	False	0.05	10000000	4	True	ContinuousGridworld/204_20_4_slugs_decentralized	slugs_decentralized	shields/general_shield_radius	0.05
ContinuousGridworld/204_20_4	none		True	-10	True	ContinuousGridWorld	MIT	-10	False	False	Individual_Deep_Q	1.0	norm_simple_mlp	False	0.05	10000000	4	True	ContinuousGridworld/204_20_4_none	none		0.05
ContinuousGridworld/205_20_5	none		True	-10	True	ContinuousGridWorld	MIT	-10	False	False	Individual_Deep_Q	1.0	norm_simple_mlp	False	0.05	10000000	5	True	ContinuousGridworld/205_20_5_slugs_centralized	slugs_centralized	shields/general_shield_radius	0.05
ContinuousGridworld/205_20_5	none		True	-10	True	ContinuousGridWorld	MIT	-10	False	False	Individual_Deep_Q	1.0	norm_simple_mlp	False	0.05	10000000	5	True	ContinuousGridworld/205_20_5_slugs_decentralized	slugs_decentralized	shields/general_shield_radius	0.05
ContinuousGridworld/205_20_5	none		True	-10	True	ContinuousGridWorld	MIT	-10	False	False	Individual_Deep_Q	1.0	norm_simple_mlp	False	0.05	10000000	5	True	ContinuousGridworld/205_20_5_none	none		0.05
ContinuousGridworld/206_20_6	none		True	-10	True	ContinuousGridWorld	MIT	-10	False	False	Individual_Deep_Q	1.0	norm_simple_mlp	False	0.05	10000000	6	True	ContinuousGridworld/206_20_6_slugs_centralized	slugs_centralized	shields/general_shield_radius	0.05
ContinuousGridworld/206_20_6	none		True	-10	True	ContinuousGridWorld	MIT	-10	False	False	Individual_Deep_Q	1.0	norm_simple_mlp	False	0.05	10000000	6	True	ContinuousGridworld/206_20_6_slugs_decentralized	slugs_decentralized	shields/general_shield_radius	0.05
ContinuousGridworld/206_20_6	none		True	-10	True	ContinuousGridWorld	MIT	-10	False	False	Individual_Deep_Q	1.0	norm_simple_mlp	False	0.05	10000000	6	True	ContinuousGridworld/206_20_6_none	none		0.05
ContinuousGridworld/207_20_7	none		True	-10	True	ContinuousGridWorld	MIT	-10	False	False	Individual_Deep_Q	1.0	norm_simple_mlp	False	0.05	10000000	7	True	ContinuousGridworld/207_20_7_slugs_centralized	slugs_centralized	shields/general_shield_radius	0.05
ContinuousGridworld/207_20_7	none		True	-10	True	ContinuousGridWorld	MIT	-10	False	False	Individual_Deep_Q	1.0	norm_simple_mlp	False	0.05	10000000	7	True	ContinuousGridworld/207_20_7_slugs_decentralized	slugs_decentralized	shields/general_shield_radius	0.05
ContinuousGridworld/207_20_7	none		True	-10	True	ContinuousGridWorld	MIT	-10	False	False	Individual_Deep_Q	1.0	norm_simple_mlp	False	0.05	10000000	7	True	ContinuousGridworld/207_20_7_none	none		0.05
ContinuousGridworld/208_20_8	none		True	-10	True	ContinuousGridWorld	MIT	-10	False	False	Individual_Deep_Q	1.0	norm_simple_mlp	False	0.05	10000000	8	True	ContinuousGridworld/208_20_8_slugs_centralized	slugs_centralized	shields/general_shield_radius	0.05
ContinuousGridworld/208_20_8	none		True	-10	True	ContinuousGridWorld	MIT	-10	False	False	Individual_Deep_Q	1.0	norm_simple_mlp	False	0.05	10000000	8	True	ContinuousGridworld/208_20_8_slugs_decentralized	slugs_decentralized	shields/general_shield_radius	0.05
ContinuousGridworld/208_20_8	none		True	-10	True	ContinuousGridWorld	MIT	-10	False	False	Individual_Deep_Q	1.0	norm_simple_mlp	False	0.05	10000000	8	True	ContinuousGridworld/208_20_8_none	none		0.05
ContinuousGridworld/209_20_9	none		True	-10	True	ContinuousGridWorld	MIT	-10	False	False	Individual_Deep_Q	1.0	norm_simple_mlp	False	0.05	10000000	9	True	ContinuousGridworld/209_20_9_slugs_centralized	slugs_centralized	shields/general_shield_radius	0.05
ContinuousGridworld/209_20_9	none		True	-10	True	ContinuousGridWorld	MIT	-10	False	False	Individual_Deep_Q	1.0	norm_simple_mlp	False	0.05	10000000	9	True	ContinuousGridworld/209_20_9_slugs_decentralized	slugs_decentralized	shields/general_shield_radius	0.05
ContinuousGridworld/209_20_9	none		True	-10	True	ContinuousGridWorld	MIT	-10	False	False	Individual_Deep_Q	1.0	norm_simple_mlp	False	0.05	10000000	9	True	ContinuousGridworld/209_20_9_none	none		0.05
ContinuousGridworld/210_21_0	slugs_centralized	shields/general_shield_radius	True	-10	False	ContinuousGridWorld	MIT	-10	False	False	Individual_Deep_Q	1.0	norm_simple_mlp	False	0.05	10000000	0	True	ContinuousGridworld/210_21_0_slugs_centralized	slugs_centralized	shields/general_shield_radius	0.05
ContinuousGridworld/210_21_0	slugs_centralized	shields/general_shield_radius	True	-10	False	ContinuousGridWorld	MIT	-10	False	False	Individual_Deep_Q	1.0	norm_simple_mlp	False	0.05	10000000	0	True	ContinuousGridworld/210_21_0_slugs_decentralized	slugs_decentralized	shields/general_shield_radius	0.05
ContinuousGridworld/210_21_0	slugs_centralized	shields/general_shield_radius	True	-10	False	ContinuousGridWorld	MIT	-10	False	False	Individual_Deep_Q	1.0	norm_simple_mlp	False	0.05	10000000	0	True	ContinuousGridworld/210_21_0_none	none		0.05
ContinuousGridworld/211_21_1	slugs_centralized	shields/general_shield_radius	True	-10	False	ContinuousGridWorld	MIT	-10	False	False	Individual_Deep_Q	1.0	norm_simple_mlp	False	0.05	10000000	1	True	ContinuousGridworld/211_21_1_slugs_centralized	slugs_centralized	shields/general_shield_radius	0.05
ContinuousGridworld/211_21_1	slugs_centralized	shields/general_shield_radius	True	-10	False	ContinuousGridWorld	MIT	-10	False	False	Individual_Deep_Q	1.0	norm_simple_mlp	False	0.05	10000000	1	True	ContinuousGridworld/211_21_1_slugs_decentralized	slugs_decentralized	shields/general_shield_radius	0.05
ContinuousGridworld/211_21_1	slugs_centralized	shields/general_shield_radius	True	-10	False	ContinuousGridWorld	MIT	-10	False	False	Individual_Deep_Q	1.0	norm_simple_mlp	False	0.05	10000000	1	True	ContinuousGridworld/211_21_1_none	none		0.05
ContinuousGridworld/212_21_2	slugs_centralized	shields/general_shield_radius	True	-10	False	ContinuousGridWorld	MIT	-10	False	False	Individual_Deep_Q	1.0	norm_simple_mlp	False	0.05	10000000	2	True	ContinuousGridworld/212_21_2_slugs_centralized	slugs_centralized	shields/general_shield_radius	0.05
ContinuousGridworld/212_21_2	slugs_centralized	shields/general_shield_radius	True	-10	False	ContinuousGridWorld	MIT	-10	False	False	Individual_Deep_Q	1.0	norm_simple_mlp	False	0.05	10000000	2	True	ContinuousGridworld/212_21_2_slugs_decentralized	slugs_decentralized	shields/general_shield_radius	0.05
ContinuousGridworld/212_21_2	slugs_centralized	shields/general_shield_radius	True	-10	False	ContinuousGridWorld	MIT	-10	False	False	Individual_Deep_Q	1.0	norm_simple_mlp	False	0.05	10000000	2	True	ContinuousGridworld/212_21_2_none	none		0.05
ContinuousGridworld/213_21_3	slugs_centralized	shields/general_shield_radius	True	-10	False	ContinuousGridWorld	MIT	-10	False	False	Individual_Deep_Q	1.0	norm_simple_mlp	False	0.05	10000000	3	True	ContinuousGridworld/213_21_3_slugs_centralized	slugs_centralized	shields/general_shield_radius	0.05
ContinuousGridworld/213_21_3	slugs_centralized	shields/general_shield_radius	True	-10	False	ContinuousGridWorld	MIT	-10	False	False	Individual_Deep_Q	1.0	norm_simple_mlp	False	0.05	10000000	3	True	ContinuousGridworld/213_21_3_slugs_decentralized	slugs_decentralized	shields/general_shield_radius	0.05
ContinuousGridworld/213_21_3	slugs_centralized	shields/general_shield_radius	True	-10	False	ContinuousGridWorld	MIT	-10	False	False	Individual_Deep_Q	1.0	norm_simple_mlp	False	0.05	10000000	3	True	ContinuousGridworld/213_21_3_none	none		0.05
ContinuousGridworld/214_21_4	slugs_centralized	shields/general_shield_radius	True	-10	False	ContinuousGridWorld	MIT	-10	False	False	Individual_Deep_Q	1.0	norm_simple_mlp	False	0.05	10000000	4	True	ContinuousGridworld/214_21_4_slugs_centralized	slugs_centralized	shields/general_shield_radius	0.05
ContinuousGridworld/214_21_4	slugs_centralized	shields/general_shield_radius	True	-10	False	ContinuousGridWorld	MIT	-10	False	False	Individual_Deep_Q	1.0	norm_simple_mlp	False	0.05	10000000	4	True	ContinuousGridworld/214_21_4_slugs_decentralized	slugs_decentralized	shields/general_shield_radius	0.05
ContinuousGridworld/214_21_4	slugs_centralized	shields/general_shield_radius	True	-10	False	ContinuousGridWorld	MIT	-10	False	False	Individual_Deep_Q	1.0	norm_simple_mlp	False	0.05	10000000	4	True	ContinuousGridworld/214_21_4_none	none		0.05
ContinuousGridworld/215_21_5	slugs_centralized	shields/general_shield_radius	True	-10	False	ContinuousGridWorld	MIT	-10	False	False	Individual_Deep_Q	1.0	norm_simple_mlp	False	0.05	10000000	5	True	ContinuousGridworld/215_21_5_slugs_centralized	slugs_centralized	shields/general_shield_radius	0.05
ContinuousGridworld/215_21_5	slugs_centralized	shields/general_shield_radius	True	-10	False	ContinuousGridWorld	MIT	-10	False	False	Individual_Deep_Q	1.0	norm_simple_mlp	False	0.05	10000000	5	True	ContinuousGridworld/215_21_5_slugs_decentralized	slugs_decentralized	shields/general_shield_radius	0.05
ContinuousGridworld/215_21_5	slugs_centralized	shields/general_shield_radius	True	-10	False	ContinuousGridWorld	MIT	-10	False	False	Individual_Deep_Q	1.0	norm_simple_mlp	False	0.05	10000000	5	True	ContinuousGridworld/215_21_5_none	none		0.05
ContinuousGridworld/216_21_6	slugs_centralized	shields/general_shield_radius	True	-10	False	ContinuousGridWorld	MIT	-10	False	False	Individual_Deep_Q	1.0	norm_simple_mlp	False	0.05	10000000	6	True	ContinuousGridworld/216_21_6_slugs_centralized	slugs_centralized	shields/general_shield_radius	0.05
ContinuousGridworld/216_21_6	slugs_centralized	shields/general_shield_radius	True	-10	False	ContinuousGridWorld	MIT	-10	False	False	Individual_Deep_Q	1.0	norm_simple_mlp	False	0.05	10000000	6	True	ContinuousGridworld/216_21_6_slugs_decentralized	slugs_decentralized	shields/general_shield_radius	0.05
ContinuousGridworld/216_21_6	slugs_centralized	shields/general_shield_radius	True	-10	False	ContinuousGridWorld	MIT	-10	False	False	Individual_Deep_Q	1.0	norm_simple_mlp	False	0.05	10000000	6	True	ContinuousGridworld/216_21_6_none	none		0.05
ContinuousGridworld/217_21_7	slugs_centralized	shields/general_shield_radius	True	-10	False	ContinuousGridWorld	MIT	-10	False	False	Individual_Deep_Q	1.0	norm_simple_mlp	False	0.05	10000000	7	True	ContinuousGridworld/217_21_7_slugs_centralized	slugs_centralized	shields/general_shield_radius	0.05
ContinuousGridworld/217_21_7	slugs_centralized	shields/general_shield_radius	True	-10	False	ContinuousGridWorld	MIT	-10	False	False	Individual_Deep_Q	1.0	norm_simple_mlp	False	0.05	10000000	7	True	ContinuousGridworld/217_21_7_slugs_decentralized	slugs_decentralized	shields/general_shield_radius	0.05
ContinuousGridworld/217_21_7	slugs_centralized	shields/general_shield_radius	True	-10	False	ContinuousGridWorld	MIT	-10	False	False	Individual_Deep_Q	1.0	norm_simple_mlp	False	0.05	10000000	7	True	ContinuousGridworld/217_21_7_none	none		0.05
ContinuousGridworld/218_21_8	slugs_centralized	shields/general_shield_radius	True	-10	False	ContinuousGridWorld	MIT	-10	False	False	Individual_Deep_Q	1.0	norm_simple_mlp	False	0.05	10000000	8	True	ContinuousGridworld/218_21_8_slugs_centralized	slugs_centralized	shields/general_shield_radius	0.05
ContinuousGridworld/218_21_8	slugs_centralized	shields/general_shield_radius	True	-10	False	ContinuousGridWorld	MIT	-10	False	False	Individual_Deep_Q	1.0	norm_simple_mlp	False	0.05	10000000	8	True	ContinuousGridworld/218_21_8_slugs_decentralized	slugs_decentralized	shields/general_shield_radius	0.05
ContinuousGridworld/218_21_8	slugs_centralized	shields/general_shield_radius	True	-10	False	ContinuousGridWorld	MIT	-10	False	False	Individual_Deep_Q	1.0	norm_simple_mlp	False	0.05	10000000	8	True	ContinuousGridworld/218_21_8_none	none		0.05
ContinuousGridworld/219_21_9	slugs_centralized	shields/general_shield_radius	True	-10	False	ContinuousGridWorld	MIT	-10	False	False	Individual_Deep_Q	1.0	norm_simple_mlp	False	0.05	10000000	9	True	ContinuousGridworld/219_21_9_slugs_centralized	slugs_centralized	shields/general_shield_radius	0.05
ContinuousGridworld/219_21_9	slugs_centralized	shields/general_shield_radius	True	-10	False	ContinuousGridWorld	MIT	-10	False	False	Individual_Deep_Q	1.0	norm_simple_mlp	False	0.05	10000000	9	True	ContinuousGridworld/219_21_9_slugs_decentralized	slugs_decentralized	shields/general_shield_radius	0.05
ContinuousGridworld/219_21_9	slugs_centralized	shields/general_shield_radius	True	-10	False	ContinuousGridWorld	MIT	-10	False	False	Individual_Deep_Q	1.0	norm_simple_mlp	False	0.05	10000000	9	True	ContinuousGridworld/219_21_9_none	none		0.05
ContinuousGridworld/220_22_0	slugs_decentralized	shields/general_shield_radius	True	-10	False	ContinuousGridWorld	MIT	-10	False	False	Individual_Deep_Q	1.0	norm_simple_mlp	False	0.05	10000000	0	True	ContinuousGridworld/220_22_0_slugs_centralized	slugs_centralized	shields/general_shield_radius	0.05
ContinuousGridworld/220_22_0	slugs_decentralized	shields/general_shield_radius	True	-10	False	ContinuousGridWorld	MIT	-10	False	False	Individual_Deep_Q	1.0	norm_simple_mlp	False	0.05	10000000	0	True	ContinuousGridworld/220_22_0_slugs_decentralized	slugs_decentralized	shields/general_shield_radius	0.05
ContinuousGridworld/220_22_0	slugs_decentralized	shields/general_shield_radius	True	-10	False	ContinuousGridWorld	MIT	-10	False	False	Individual_Deep_Q	1.0	norm_simple_mlp	False	0.05	10000000	0	True	ContinuousGridworld/220_22_0_none	none		0.05
ContinuousGridworld/221_22_1	slugs_decentralized	shields/general_shield_radius	True	-10	False	ContinuousGridWorld	MIT	-10	False	False	Individual_Deep_Q	1.0	norm_simple_mlp	False	0.05	10000000	1	True	ContinuousGridworld/221_22_1_slugs_centralized	slugs_centralized	shields/general_shield_radius	0.05
ContinuousGridworld/221_22_1	slugs_decentralized	shields/general_shield_radius	True	-10	False	ContinuousGridWorld	MIT	-10	False	False	Individual_Deep_Q	1.0	norm_simple_mlp	False	0.05	10000000	1	True	ContinuousGridworld/221_22_1_slugs_decentralized	slugs_decentralized	shields/general_shield_radius	0.05
ContinuousGridworld/221_22_1	slugs_decentralized	shields/general_shield_radius	True	-10	False	ContinuousGridWorld	MIT	-10	False	False	Individual_Deep_Q	1.0	norm_simple_mlp	False	0.05	10000000	1	True	ContinuousGridworld/221_22_1_none	none		0.05
ContinuousGridworld/222_22_2	slugs_decentralized	shields/general_shield_radius	True	-10	False	ContinuousGridWorld	MIT	-10	False	False	Individual_Deep_Q	1.0	norm_simple_mlp	False	0.05	10000000	2	True	ContinuousGridworld/222_22_2_slugs_centralized	slugs_centralized	shields/general_shield_radius	0.05
ContinuousGridworld/222_22_2	slugs_decentralized	shields/general_shield_radius	True	-10	False	ContinuousGridWorld	MIT	-10	False	False	Individual_Deep_Q	1.0	norm_simple_mlp	False	0.05	10000000	2	True	ContinuousGridworld/222_22_2_slugs_decentralized	slugs_decentralized	shields/general_shield_radius	0.05
ContinuousGridworld/222_22_2	slugs_decentralized	shields/general_shield_radius	True	-10	False	ContinuousGridWorld	MIT	-10	False	False	Individual_Deep_Q	1.0	norm_simple_mlp	False	0.05	10000000	2	True	ContinuousGridworld/222_22_2_none	none		0.05
ContinuousGridworld/223_22_3	slugs_decentralized	shields/general_shield_radius	True	-10	False	ContinuousGridWorld	MIT	-10	False	False	Individual_Deep_Q	1.0	norm_simple_mlp	False	0.05	10000000	3	True	ContinuousGridworld/223_22_3_slugs_centralized	slugs_centralized	shields/general_shield_radius	0.05
ContinuousGridworld/223_22_3	slugs_decentralized	shields/general_shield_radius	True	-10	False	ContinuousGridWorld	MIT	-10	False	False	Individual_Deep_Q	1.0	norm_simple_mlp	False	0.05	10000000	3	True	ContinuousGridworld/223_22_3_slugs_decentralized	slugs_decentralized	shields/general_shield_radius	0.05
ContinuousGridworld/223_22_3	slugs_decentralized	shields/general_shield_radius	True	-10	False	ContinuousGridWorld	MIT	-10	False	False	Individual_Deep_Q	1.0	norm_simple_mlp	False	0.05	10000000	3	True	ContinuousGridworld/223_22_3_none	none		0.05
ContinuousGridworld/224_22_4	slugs_decentralized	shields/general_shield_radius	True	-10	False	ContinuousGridWorld	MIT	-10	False	False	Individual_Deep_Q	1.0	norm_simple_mlp	False	0.05	10000000	4	True	ContinuousGridworld/224_22_4_slugs_centralized	slugs_centralized	shields/general_shield_radius	0.05
ContinuousGridworld/224_22_4	slugs_decentralized	shields/general_shield_radius	True	-10	False	ContinuousGridWorld	MIT	-10	False	False	Individual_Deep_Q	1.0	norm_simple_mlp	False	0.05	10000000	4	True	ContinuousGridworld/224_22_4_slugs_decentralized	slugs_decentralized	shields/general_shield_radius	0.05
ContinuousGridworld/224_22_4	slugs_decentralized	shields/general_shield_radius	True	-10	False	ContinuousGridWorld	MIT	-10	False	False	Individual_Deep_Q	1.0	norm_simple_mlp	False	0.05	10000000	4	True	ContinuousGridworld/224_22_4_none	none		0.05
ContinuousGridworld/225_22_5	slugs_decentralized	shields/general_shield_radius	True	-10	False	ContinuousGridWorld	MIT	-10	False	False	Individual_Deep_Q	1.0	norm_simple_mlp	False	0.05	10000000	5	True	ContinuousGridworld/225_22_5_slugs_centralized	slugs_centralized	shields/general_shield_radius	0.05
ContinuousGridworld/225_22_5	slugs_decentralized	shields/general_shield_radius	True	-10	False	ContinuousGridWorld	MIT	-10	False	False	Individual_Deep_Q	1.0	norm_simple_mlp	False	0.05	10000000	5	True	ContinuousGridworld/225_22_5_slugs_decentralized	slugs_decentralized	shields/general_shield_radius	0.05
ContinuousGridworld/225_22_5	slugs_decentralized	shields/general_shield_radius	True	-10	False	ContinuousGridWorld	MIT	-10	False	False	Individual_Deep_Q	1.0	norm_simple_mlp	False	0.05	10000000	5	True	ContinuousGridworld/225_22_5_none	none		0.05
ContinuousGridworld/226_22_6	slugs_decentralized	shields/general_shield_radius	True	-10	False	ContinuousGridWorld	MIT	-10	False	False	Individual_Deep_Q	1.0	norm_simple_mlp	False	0.05	10000000	6	True	ContinuousGridworld/226_22_6_slugs_centralized	slugs_centralized	shields/general_shield_radius	0.05
ContinuousGridworld/226_22_6	slugs_decentralized	shields/general_shield_radius	True	-10	False	ContinuousGridWorld	MIT	-10	False	False	Individual_Deep_Q	1.0	norm_simple_mlp	False	0.05	10000000	6	True	ContinuousGridworld/226_22_6_slugs_decentralized	slugs_decentralized	shields/general_shield_radius	0.05
ContinuousGridworld/226_22_6	slugs_decentralized	shields/general_shield_radius	True	-10	False	ContinuousGridWorld	MIT	-10	False	False	Individual_Deep_Q	1.0	norm_simple_mlp	False	0.05	10000000	6	True	ContinuousGridworld/226_22_6_none	none		0.05
ContinuousGridworld/227_22_7	slugs_decentralized	shields/general_shield_radius	True	-10	False	ContinuousGridWorld	MIT	-10	False	False	Individual_Deep_Q	1.0	norm_simple_mlp	False	0.05	10000000	7	True	ContinuousGridworld/227_22_7_slugs_centralized	slugs_centralized	shields/general_shield_radius	0.05
ContinuousGridworld/227_22_7	slugs_decentralized	shields/general_shield_radius	True	-10	False	ContinuousGridWorld	MIT	-10	False	False	Individual_Deep_Q	1.0	norm_simple_mlp	False	0.05	10000000	7	True	ContinuousGridworld/227_22_7_slugs_decentralized	slugs_decentralized	shields/general_shield_radius	0.05
ContinuousGridworld/227_22_7	slugs_decentralized	shields/general_shield_radius	True	-10	False	ContinuousGridWorld	MIT	-10	False	False	Individual_Deep_Q	1.0	norm_simple_mlp	False	0.05	10000000	7	True	ContinuousGridworld/227_22_7_none	none		0.05
ContinuousGridworld/228_22_8	slugs_decentralized	shields/general_shield_radius	True	-10	False	ContinuousGridWorld	MIT	-10	False	False	Individual_Deep_Q	1.0	norm_simple_mlp	False	0.05	10000000	8	True	ContinuousGridworld/228_22_8_slugs_centralized	slugs_centralized	shields/general_shield_radius	0.05
ContinuousGridworld/228_22_8	slugs_decentralized	shields/general_shield_radius	True	-10	False	ContinuousGridWorld	MIT	-10	False	False	Individual_Deep_Q	1.0	norm_simple_mlp	False	0.05	10000000	8	True	ContinuousGridworld/228_22_8_slugs_decentralized	slugs_decentralized	shields/general_shield_radius	0.05
ContinuousGridworld/228_22_8	slugs_decentralized	shields/general_shield_radius	True	-10	False	ContinuousGridWorld	MIT	-10	False	False	Individual_Deep_Q	1.0	norm_simple_mlp	False	0.05	10000000	8	True	ContinuousGridworld/228_22_8_none	none		0.05
ContinuousGridworld/229_22_9	slugs_decentralized	shields/general_shield_radius	True	-10	False	ContinuousGridWorld	MIT	-10	False	False	Individual_Deep_Q	1.0	norm_simple_mlp	False	0.05	10000000	9	True	ContinuousGridworld/229_22_9_slugs_centralized	slugs_centralized	shields/general_shield_radius	0.05
ContinuousGridworld/229_22_9	slugs_decentralized	shields/general_shield_radius	True	-10	False	ContinuousGridWorld	MIT	-10	False	False	Individual_Deep_Q	1.0	norm_simple_mlp	False	0.05	10000000	9	True	ContinuousGridworld/229_22_9_slugs_decentralized	slugs_decentralized	shields/general_shield_radius	0.05
ContinuousGridworld/229_22_9	slugs_decentralized	shields/general_shield_radius	True	-10	False	ContinuousGridWorld	MIT	-10	False	False	Individual_Deep_Q	1.0	norm_simple_mlp	False	0.05	10000000	9	True	ContinuousGridworld/229_22_9_none	none		0.05
ContinuousGridworld/230_23_0	none		True	-10	False	ContinuousGridWorld	MIT	-10	False	False	Individual_Deep_Q	1.0	norm_simple_mlp	False	0.05	10000000	0	True	ContinuousGridworld/230_23_0_slugs_centralized	slugs_centralized	shields/general_shield_radius	0.05
ContinuousGridworld/230_23_0	none		True	-10	False	ContinuousGridWorld	MIT	-10	False	False	Individual_Deep_Q	1.0	norm_simple_mlp	False	0.05	10000000	0	True	ContinuousGridworld/230_23_0_slugs_decentralized	slugs_decentralized	shields/general_shield_radius	0.05
ContinuousGridworld/230_23_0	none		True	-10	False	ContinuousGridWorld	MIT	-10	False	False	Individual_Deep_Q	1.0	norm_simple_mlp	False	0.05	10000000	0	True	ContinuousGridworld/230_23_0_none	none		0.05
ContinuousGridworld/231_23_1	none		True	-10	False	ContinuousGridWorld	MIT	-10	False	False	Individual_Deep_Q	1.0	norm_simple_mlp	False	0.05	10000000	1	True	ContinuousGridworld/231_23_1_slugs_centralized	slugs_centralized	shields/general_shield_radius	0.05
ContinuousGridworld/231_23_1	none		True	-10	False	ContinuousGridWorld	MIT	-10	False	False	Individual_Deep_Q	1.0	norm_simple_mlp	False	0.05	10000000	1	True	ContinuousGridworld/231_23_1_slugs_decentralized	slugs_decentralized	shields/general_shield_radius	0.05
ContinuousGridworld/231_23_1	none		True	-10	False	ContinuousGridWorld	MIT	-10	False	False	Individual_Deep_Q	1.0	norm_simple_mlp	False	0.05	10000000	1	True	ContinuousGridworld/231_23_1_none	none		0.05
ContinuousGridworld/232_23_2	none		True	-10	False	ContinuousGridWorld	MIT	-10	False	False	Individual_Deep_Q	1.0	norm_simple_mlp	False	0.05	10000000	2	True	ContinuousGridworld/232_23_2_slugs_centralized	slugs_centralized	shields/general_shield_radius	0.05
ContinuousGridworld/232_23_2	none		True	-10	False	ContinuousGridWorld	MIT	-10	False	False	Individual_Deep_Q	1.0	norm_simple_mlp	False	0.05	10000000	2	True	ContinuousGridworld/232_23_2_slugs_decentralized	slugs_decentralized	shields/general_shield_radius	0.05
ContinuousGridworld/232_23_2	none		True	-10	False	ContinuousGridWorld	MIT	-10	False	False	Individual_Deep_Q	1.0	norm_simple_mlp	False	0.05	10000000	2	True	ContinuousGridworld/232_23_2_none	none		0.05
ContinuousGridworld/233_23_3	none		True	-10	False	ContinuousGridWorld	MIT	-10	False	False	Individual_Deep_Q	1.0	norm_simple_mlp	False	0.05	10000000	3	True	ContinuousGridworld/233_23_3_slugs_centralized	slugs_centralized	shields/general_shield_radius	0.05
ContinuousGridworld/233_23_3	none		True	-10	False	ContinuousGridWorld	MIT	-10	False	False	Individual_Deep_Q	1.0	norm_simple_mlp	False	0.05	10000000	3	True	ContinuousGridworld/233_23_3_slugs_decentralized	slugs_decentralized	shields/general_shield_radius	0.05
ContinuousGridworld/233_23_3	none		True	-10	False	ContinuousGridWorld	MIT	-10	False	False	Individual_Deep_Q	1.0	norm_simple_mlp	False	0.05	10000000	3	True	ContinuousGridworld/233_23_3_none	none		0.05
ContinuousGridworld/234_23_4	none		True	-10	False	ContinuousGridWorld	MIT	-10	False	False	Individual_Deep_Q	1.0	norm_simple_mlp	False	0.05	10000000	4	True	ContinuousGridworld/234_23_4_slugs_centralized	slugs_centralized	shields/general_shield_radius	0.05
ContinuousGridworld/234_23_4	none		True	-10	False	ContinuousGridWorld	MIT	-10	False	False	Individual_Deep_Q	1.0	norm_simple_mlp	False	0.05	10000000	4	True	ContinuousGridworld/234_23_4_slugs_decentralized	slugs_decentralized	shields/general_shield_radius	0.05
ContinuousGridworld/234_23_4	none		True	-10	False	ContinuousGridWorld	MIT	-10	False	False	Individual_Deep_Q	1.0	norm_simple_mlp	False	0.05	10000000	4	True	ContinuousGridworld/234_23_4_none	none		0.05
ContinuousGridworld/235_23_5	none		True	-10	False	ContinuousGridWorld	MIT	-10	False	False	Individual_Deep_Q	1.0	norm_simple_mlp	False	0.05	10000000	5	True	ContinuousGridworld/235_23_5_slugs_centralized	slugs_centralized	shields/general_shield_radius	0.05
ContinuousGridworld/235_23_5	none		True	-10	False	ContinuousGridWorld	MIT	-10	False	False	Individual_Deep_Q	1.0	norm_simple_mlp	False	0.05	10000000	5	True	ContinuousGridworld/235_23_5_slugs_decentralized	slugs_decentralized	shields/general_shield_radius	0.05
ContinuousGridworld/235_23_5	none		True	-10	False	ContinuousGridWorld	MIT	-10	False	False	Individual_Deep_Q	1.0	norm_simple_mlp	False	0.05	10000000	5	True	ContinuousGridworld/235_23_5_none	none		0.05
ContinuousGridworld/236_23_6	none		True	-10	False	ContinuousGridWorld	MIT	-10	False	False	Individual_Deep_Q	1.0	norm_simple_mlp	False	0.05	10000000	6	True	ContinuousGridworld/236_23_6_slugs_centralized	slugs_centralized	shields/general_shield_radius	0.05
ContinuousGridworld/236_23_6	none		True	-10	False	ContinuousGridWorld	MIT	-10	False	False	Individual_Deep_Q	1.0	norm_simple_mlp	False	0.05	10000000	6	True	ContinuousGridworld/236_23_6_slugs_decentralized	slugs_decentralized	shields/general_shield_radius	0.05
ContinuousGridworld/236_23_6	none		True	-10	False	ContinuousGridWorld	MIT	-10	False	False	Individual_Deep_Q	1.0	norm_simple_mlp	False	0.05	10000000	6	True	ContinuousGridworld/236_23_6_none	none		0.05
ContinuousGridworld/237_23_7	none		True	-10	False	ContinuousGridWorld	MIT	-10	False	False	Individual_Deep_Q	1.0	norm_simple_mlp	False	0.05	10000000	7	True	ContinuousGridworld/237_23_7_slugs_centralized	slugs_centralized	shields/general_shield_radius	0.05
ContinuousGridworld/237_23_7	none		True	-10	False	ContinuousGridWorld	MIT	-10	False	False	Individual_Deep_Q	1.0	norm_simple_mlp	False	0.05	10000000	7	True	ContinuousGridworld/237_23_7_slugs_decentralized	slugs_decentralized	shields/general_shield_radius	0.05
ContinuousGridworld/237_23_7	none		True	-10	False	ContinuousGridWorld	MIT	-10	False	False	Individual_Deep_Q	1.0	norm_simple_mlp	False	0.05	10000000	7	True	ContinuousGridworld/237_23_7_none	none		0.05
ContinuousGridworld/238_23_8	none		True	-10	False	ContinuousGridWorld	MIT	-10	False	False	Individual_Deep_Q	1.0	norm_simple_mlp	False	0.05	10000000	8	True	ContinuousGridworld/238_23_8_slugs_centralized	slugs_centralized	shields/general_shield_radius	0.05
ContinuousGridworld/238_23_8	none		True	-10	False	ContinuousGridWorld	MIT	-10	False	False	Individual_Deep_Q	1.0	norm_simple_mlp	False	0.05	10000000	8	True	ContinuousGridworld/238_23_8_slugs_decentralized	slugs_decentralized	shields/general_shield_radius	0.05
ContinuousGridworld/238_23_8	none		True	-10	False	ContinuousGridWorld	MIT	-10	False	False	Individual_Deep_Q	1.0	norm_simple_mlp	False	0.05	10000000	8	True	ContinuousGridworld/238_23_8_none	none		0.05
ContinuousGridworld/239_23_9	none		True	-10	False	ContinuousGridWorld	MIT	-10	False	False	Individual_Deep_Q	1.0	norm_simple_mlp	False	0.05	10000000	9	True	ContinuousGridworld/239_23_9_slugs_centralized	slugs_centralized	shields/general_shield_radius	0.05
ContinuousGridworld/239_23_9	none		True	-10	False	ContinuousGridWorld	MIT	-10	False	False	Individual_Deep_Q	1.0	norm_simple_mlp	False	0.05	10000000	9	True	ContinuousGridworld/239_23_9_slugs_decentralized	slugs_decentralized	shields/general_shield_radius	0.05
ContinuousGridworld/239_23_9	none		True	-10	False	ContinuousGridWorld	MIT	-10	False	False	Individual_Deep_Q	1.0	norm_simple_mlp	False	0.05	10000000	9	True	ContinuousGridworld/239_23_9_none	none		0.05
