# Supplementary material
Source: ML conference proceedings conference paper supplement (https://proceedings.neurips.cc/paper_files/paper/2022/hash/57444e14ecd9e2c8f603b4f012ce3811-Abstract.html)
Supplement: Supplementary file 1 [file 57444e14ecd9e2c8f603b4f012ce3811-Supplemental-Conference.zip › 3410_shield_decentralization_for_sa-Supplementary Material/parallel_configs/ContinuousGridworldTrain.csv]

run_name	shield	shield_specification	punish_unsafe_orig_action	punish_unsafe_orig_action_modifier	randomize_starts	map_type	grid_world_map_name	grid_world_collision_penalty	grid_world_agents_bounce	grid_world_terminate_on_collision	learner_type	learner_anneal_eps_start	learner_deep_network_model	learner_transform_one_hot	learner_anneal_eps_finish	max_total_steps	seed	skip_evaluation
ContinuousGridworld/0_0_0	slugs_centralized	shields/general_shield_radius	True	-10	True	ContinuousGridWorld	Pentagon	-10	False	False	Individual_Deep_Q	1.0	norm_simple_mlp	False	0.05	10000000	0	True
ContinuousGridworld/1_0_1	slugs_centralized	shields/general_shield_radius	True	-10	True	ContinuousGridWorld	Pentagon	-10	False	False	Individual_Deep_Q	1.0	norm_simple_mlp	False	0.05	10000000	1	True
ContinuousGridworld/2_0_2	slugs_centralized	shields/general_shield_radius	True	-10	True	ContinuousGridWorld	Pentagon	-10	False	False	Individual_Deep_Q	1.0	norm_simple_mlp	False	0.05	10000000	2	True
ContinuousGridworld/3_0_3	slugs_centralized	shields/general_shield_radius	True	-10	True	ContinuousGridWorld	Pentagon	-10	False	False	Individual_Deep_Q	1.0	norm_simple_mlp	False	0.05	10000000	3	True
ContinuousGridworld/4_0_4	slugs_centralized	shields/general_shield_radius	True	-10	True	ContinuousGridWorld	Pentagon	-10	False	False	Individual_Deep_Q	1.0	norm_simple_mlp	False	0.05	10000000	4	True
ContinuousGridworld/5_0_5	slugs_centralized	shields/general_shield_radius	True	-10	True	ContinuousGridWorld	Pentagon	-10	False	False	Individual_Deep_Q	1.0	norm_simple_mlp	False	0.05	10000000	5	True
ContinuousGridworld/6_0_6	slugs_centralized	shields/general_shield_radius	True	-10	True	ContinuousGridWorld	Pentagon	-10	False	False	Individual_Deep_Q	1.0	norm_simple_mlp	False	0.05	10000000	6	True
ContinuousGridworld/7_0_7	slugs_centralized	shields/general_shield_radius	True	-10	True	ContinuousGridWorld	Pentagon	-10	False	False	Individual_Deep_Q	1.0	norm_simple_mlp	False	0.05	10000000	7	True
ContinuousGridworld/8_0_8	slugs_centralized	shields/general_shield_radius	True	-10	True	ContinuousGridWorld	Pentagon	-10	False	False	Individual_Deep_Q	1.0	norm_simple_mlp	False	0.05	10000000	8	True
ContinuousGridworld/9_0_9	slugs_centralized	shields/general_shield_radius	True	-10	True	ContinuousGridWorld	Pentagon	-10	False	False	Individual_Deep_Q	1.0	norm_simple_mlp	False	0.05	10000000	9	True
ContinuousGridworld/10_1_0	slugs_decentralized	shields/general_shield_radius	True	-10	True	ContinuousGridWorld	Pentagon	-10	False	False	Individual_Deep_Q	1.0	norm_simple_mlp	False	0.05	10000000	0	True
ContinuousGridworld/11_1_1	slugs_decentralized	shields/general_shield_radius	True	-10	True	ContinuousGridWorld	Pentagon	-10	False	False	Individual_Deep_Q	1.0	norm_simple_mlp	False	0.05	10000000	1	True
ContinuousGridworld/12_1_2	slugs_decentralized	shields/general_shield_radius	True	-10	True	ContinuousGridWorld	Pentagon	-10	False	False	Individual_Deep_Q	1.0	norm_simple_mlp	False	0.05	10000000	2	True
ContinuousGridworld/13_1_3	slugs_decentralized	shields/general_shield_radius	True	-10	True	ContinuousGridWorld	Pentagon	-10	False	False	Individual_Deep_Q	1.0	norm_simple_mlp	False	0.05	10000000	3	True
ContinuousGridworld/14_1_4	slugs_decentralized	shields/general_shield_radius	True	-10	True	ContinuousGridWorld	Pentagon	-10	False	False	Individual_Deep_Q	1.0	norm_simple_mlp	False	0.05	10000000	4	True
ContinuousGridworld/15_1_5	slugs_decentralized	shields/general_shield_radius	True	-10	True	ContinuousGridWorld	Pentagon	-10	False	False	Individual_Deep_Q	1.0	norm_simple_mlp	False	0.05	10000000	5	True
ContinuousGridworld/16_1_6	slugs_decentralized	shields/general_shield_radius	True	-10	True	ContinuousGridWorld	Pentagon	-10	False	False	Individual_Deep_Q	1.0	norm_simple_mlp	False	0.05	10000000	6	True
ContinuousGridworld/17_1_7	slugs_decentralized	shields/general_shield_radius	True	-10	True	ContinuousGridWorld	Pentagon	-10	False	False	Individual_Deep_Q	1.0	norm_simple_mlp	False	0.05	10000000	7	True
ContinuousGridworld/18_1_8	slugs_decentralized	shields/general_shield_radius	True	-10	True	ContinuousGridWorld	Pentagon	-10	False	False	Individual_Deep_Q	1.0	norm_simple_mlp	False	0.05	10000000	8	True
ContinuousGridworld/19_1_9	slugs_decentralized	shields/general_shield_radius	True	-10	True	ContinuousGridWorld	Pentagon	-10	False	False	Individual_Deep_Q	1.0	norm_simple_mlp	False	0.05	10000000	9	True
ContinuousGridworld/20_2_0	none		True	-10	True	ContinuousGridWorld	Pentagon	-10	False	False	Individual_Deep_Q	1.0	norm_simple_mlp	False	0.05	10000000	0	True
ContinuousGridworld/21_2_1	none		True	-10	True	ContinuousGridWorld	Pentagon	-10	False	False	Individual_Deep_Q	1.0	norm_simple_mlp	False	0.05	10000000	1	True
ContinuousGridworld/22_2_2	none		True	-10	True	ContinuousGridWorld	Pentagon	-10	False	False	Individual_Deep_Q	1.0	norm_simple_mlp	False	0.05	10000000	2	True
ContinuousGridworld/23_2_3	none		True	-10	True	ContinuousGridWorld	Pentagon	-10	False	False	Individual_Deep_Q	1.0	norm_simple_mlp	False	0.05	10000000	3	True
ContinuousGridworld/24_2_4	none		True	-10	True	ContinuousGridWorld	Pentagon	-10	False	False	Individual_Deep_Q	1.0	norm_simple_mlp	False	0.05	10000000	4	True
ContinuousGridworld/25_2_5	none		True	-10	True	ContinuousGridWorld	Pentagon	-10	False	False	Individual_Deep_Q	1.0	norm_simple_mlp	False	0.05	10000000	5	True
ContinuousGridworld/26_2_6	none		True	-10	True	ContinuousGridWorld	Pentagon	-10	False	False	Individual_Deep_Q	1.0	norm_simple_mlp	False	0.05	10000000	6	True
ContinuousGridworld/27_2_7	none		True	-10	True	ContinuousGridWorld	Pentagon	-10	False	False	Individual_Deep_Q	1.0	norm_simple_mlp	False	0.05	10000000	7	True
ContinuousGridworld/28_2_8	none		True	-10	True	ContinuousGridWorld	Pentagon	-10	False	False	Individual_Deep_Q	1.0	norm_simple_mlp	False	0.05	10000000	8	True
ContinuousGridworld/29_2_9	none		True	-10	True	ContinuousGridWorld	Pentagon	-10	False	False	Individual_Deep_Q	1.0	norm_simple_mlp	False	0.05	10000000	9	True
ContinuousGridworld/30_3_0	slugs_centralized	shields/general_shield_radius	True	-10	False	ContinuousGridWorld	Pentagon	-10	False	False	Individual_Deep_Q	1.0	norm_simple_mlp	False	0.05	10000000	0	True
ContinuousGridworld/31_3_1	slugs_centralized	shields/general_shield_radius	True	-10	False	ContinuousGridWorld	Pentagon	-10	False	False	Individual_Deep_Q	1.0	norm_simple_mlp	False	0.05	10000000	1	True
ContinuousGridworld/32_3_2	slugs_centralized	shields/general_shield_radius	True	-10	False	ContinuousGridWorld	Pentagon	-10	False	False	Individual_Deep_Q	1.0	norm_simple_mlp	False	0.05	10000000	2	True
ContinuousGridworld/33_3_3	slugs_centralized	shields/general_shield_radius	True	-10	False	ContinuousGridWorld	Pentagon	-10	False	False	Individual_Deep_Q	1.0	norm_simple_mlp	False	0.05	10000000	3	True
ContinuousGridworld/34_3_4	slugs_centralized	shields/general_shield_radius	True	-10	False	ContinuousGridWorld	Pentagon	-10	False	False	Individual_Deep_Q	1.0	norm_simple_mlp	False	0.05	10000000	4	True
ContinuousGridworld/35_3_5	slugs_centralized	shields/general_shield_radius	True	-10	False	ContinuousGridWorld	Pentagon	-10	False	False	Individual_Deep_Q	1.0	norm_simple_mlp	False	0.05	10000000	5	True
ContinuousGridworld/36_3_6	slugs_centralized	shields/general_shield_radius	True	-10	False	ContinuousGridWorld	Pentagon	-10	False	False	Individual_Deep_Q	1.0	norm_simple_mlp	False	0.05	10000000	6	True
ContinuousGridworld/37_3_7	slugs_centralized	shields/general_shield_radius	True	-10	False	ContinuousGridWorld	Pentagon	-10	False	False	Individual_Deep_Q	1.0	norm_simple_mlp	False	0.05	10000000	7	True
ContinuousGridworld/38_3_8	slugs_centralized	shields/general_shield_radius	True	-10	False	ContinuousGridWorld	Pentagon	-10	False	False	Individual_Deep_Q	1.0	norm_simple_mlp	False	0.05	10000000	8	True
ContinuousGridworld/39_3_9	slugs_centralized	shields/general_shield_radius	True	-10	False	ContinuousGridWorld	Pentagon	-10	False	False	Individual_Deep_Q	1.0	norm_simple_mlp	False	0.05	10000000	9	True
ContinuousGridworld/40_4_0	slugs_decentralized	shields/general_shield_radius	True	-10	False	ContinuousGridWorld	Pentagon	-10	False	False	Individual_Deep_Q	1.0	norm_simple_mlp	False	0.05	10000000	0	True
ContinuousGridworld/41_4_1	slugs_decentralized	shields/general_shield_radius	True	-10	False	ContinuousGridWorld	Pentagon	-10	False	False	Individual_Deep_Q	1.0	norm_simple_mlp	False	0.05	10000000	1	True
ContinuousGridworld/42_4_2	slugs_decentralized	shields/general_shield_radius	True	-10	False	ContinuousGridWorld	Pentagon	-10	False	False	Individual_Deep_Q	1.0	norm_simple_mlp	False	0.05	10000000	2	True
ContinuousGridworld/43_4_3	slugs_decentralized	shields/general_shield_radius	True	-10	False	ContinuousGridWorld	Pentagon	-10	False	False	Individual_Deep_Q	1.0	norm_simple_mlp	False	0.05	10000000	3	True
ContinuousGridworld/44_4_4	slugs_decentralized	shields/general_shield_radius	True	-10	False	ContinuousGridWorld	Pentagon	-10	False	False	Individual_Deep_Q	1.0	norm_simple_mlp	False	0.05	10000000	4	True
ContinuousGridworld/45_4_5	slugs_decentralized	shields/general_shield_radius	True	-10	False	ContinuousGridWorld	Pentagon	-10	False	False	Individual_Deep_Q	1.0	norm_simple_mlp	False	0.05	10000000	5	True
ContinuousGridworld/46_4_6	slugs_decentralized	shields/general_shield_radius	True	-10	False	ContinuousGridWorld	Pentagon	-10	False	False	Individual_Deep_Q	1.0	norm_simple_mlp	False	0.05	10000000	6	True
ContinuousGridworld/47_4_7	slugs_decentralized	shields/general_shield_radius	True	-10	False	ContinuousGridWorld	Pentagon	-10	False	False	Individual_Deep_Q	1.0	norm_simple_mlp	False	0.05	10000000	7	True
ContinuousGridworld/48_4_8	slugs_decentralized	shields/general_shield_radius	True	-10	False	ContinuousGridWorld	Pentagon	-10	False	False	Individual_Deep_Q	1.0	norm_simple_mlp	False	0.05	10000000	8	True
ContinuousGridworld/49_4_9	slugs_decentralized	shields/general_shield_radius	True	-10	False	ContinuousGridWorld	Pentagon	-10	False	False	Individual_Deep_Q	1.0	norm_simple_mlp	False	0.05	10000000	9	True
ContinuousGridworld/50_5_0	none		True	-10	False	ContinuousGridWorld	Pentagon	-10	False	False	Individual_Deep_Q	1.0	norm_simple_mlp	False	0.05	10000000	0	True
ContinuousGridworld/51_5_1	none		True	-10	False	ContinuousGridWorld	Pentagon	-10	False	False	Individual_Deep_Q	1.0	norm_simple_mlp	False	0.05	10000000	1	True
ContinuousGridworld/52_5_2	none		True	-10	False	ContinuousGridWorld	Pentagon	-10	False	False	Individual_Deep_Q	1.0	norm_simple_mlp	False	0.05	10000000	2	True
ContinuousGridworld/53_5_3	none		True	-10	False	ContinuousGridWorld	Pentagon	-10	False	False	Individual_Deep_Q	1.0	norm_simple_mlp	False	0.05	10000000	3	True
ContinuousGridworld/54_5_4	none		True	-10	False	ContinuousGridWorld	Pentagon	-10	False	False	Individual_Deep_Q	1.0	norm_simple_mlp	False	0.05	10000000	4	True
ContinuousGridworld/55_5_5	none		True	-10	False	ContinuousGridWorld	Pentagon	-10	False	False	Individual_Deep_Q	1.0	norm_simple_mlp	False	0.05	10000000	5	True
ContinuousGridworld/56_5_6	none		True	-10	False	ContinuousGridWorld	Pentagon	-10	False	False	Individual_Deep_Q	1.0	norm_simple_mlp	False	0.05	10000000	6	True
ContinuousGridworld/57_5_7	none		True	-10	False	ContinuousGridWorld	Pentagon	-10	False	False	Individual_Deep_Q	1.0	norm_simple_mlp	False	0.05	10000000	7	True
ContinuousGridworld/58_5_8	none		True	-10	False	ContinuousGridWorld	Pentagon	-10	False	False	Individual_Deep_Q	1.0	norm_simple_mlp	False	0.05	10000000	8	True
ContinuousGridworld/59_5_9	none		True	-10	False	ContinuousGridWorld	Pentagon	-10	False	False	Individual_Deep_Q	1.0	norm_simple_mlp	False	0.05	10000000	9	True
ContinuousGridworld/60_6_0	slugs_centralized	shields/general_shield_radius	True	-10	True	ContinuousGridWorld	ISR	-10	False	False	Individual_Deep_Q	1.0	norm_simple_mlp	False	0.05	10000000	0	True
ContinuousGridworld/61_6_1	slugs_centralized	shields/general_shield_radius	True	-10	True	ContinuousGridWorld	ISR	-10	False	False	Individual_Deep_Q	1.0	norm_simple_mlp	False	0.05	10000000	1	True
ContinuousGridworld/62_6_2	slugs_centralized	shields/general_shield_radius	True	-10	True	ContinuousGridWorld	ISR	-10	False	False	Individual_Deep_Q	1.0	norm_simple_mlp	False	0.05	10000000	2	True
ContinuousGridworld/63_6_3	slugs_centralized	shields/general_shield_radius	True	-10	True	ContinuousGridWorld	ISR	-10	False	False	Individual_Deep_Q	1.0	norm_simple_mlp	False	0.05	10000000	3	True
ContinuousGridworld/64_6_4	slugs_centralized	shields/general_shield_radius	True	-10	True	ContinuousGridWorld	ISR	-10	False	False	Individual_Deep_Q	1.0	norm_simple_mlp	False	0.05	10000000	4	True
ContinuousGridworld/65_6_5	slugs_centralized	shields/general_shield_radius	True	-10	True	ContinuousGridWorld	ISR	-10	False	False	Individual_Deep_Q	1.0	norm_simple_mlp	False	0.05	10000000	5	True
ContinuousGridworld/66_6_6	slugs_centralized	shields/general_shield_radius	True	-10	True	ContinuousGridWorld	ISR	-10	False	False	Individual_Deep_Q	1.0	norm_simple_mlp	False	0.05	10000000	6	True
ContinuousGridworld/67_6_7	slugs_centralized	shields/general_shield_radius	True	-10	True	ContinuousGridWorld	ISR	-10	False	False	Individual_Deep_Q	1.0	norm_simple_mlp	False	0.05	10000000	7	True
ContinuousGridworld/68_6_8	slugs_centralized	shields/general_shield_radius	True	-10	True	ContinuousGridWorld	ISR	-10	False	False	Individual_Deep_Q	1.0	norm_simple_mlp	False	0.05	10000000	8	True
ContinuousGridworld/69_6_9	slugs_centralized	shields/general_shield_radius	True	-10	True	ContinuousGridWorld	ISR	-10	False	False	Individual_Deep_Q	1.0	norm_simple_mlp	False	0.05	10000000	9	True
ContinuousGridworld/70_7_0	slugs_decentralized	shields/general_shield_radius	True	-10	True	ContinuousGridWorld	ISR	-10	False	False	Individual_Deep_Q	1.0	norm_simple_mlp	False	0.05	10000000	0	True
ContinuousGridworld/71_7_1	slugs_decentralized	shields/general_shield_radius	True	-10	True	ContinuousGridWorld	ISR	-10	False	False	Individual_Deep_Q	1.0	norm_simple_mlp	False	0.05	10000000	1	True
ContinuousGridworld/72_7_2	slugs_decentralized	shields/general_shield_radius	True	-10	True	ContinuousGridWorld	ISR	-10	False	False	Individual_Deep_Q	1.0	norm_simple_mlp	False	0.05	10000000	2	True
ContinuousGridworld/73_7_3	slugs_decentralized	shields/general_shield_radius	True	-10	True	ContinuousGridWorld	ISR	-10	False	False	Individual_Deep_Q	1.0	norm_simple_mlp	False	0.05	10000000	3	True
ContinuousGridworld/74_7_4	slugs_decentralized	shields/general_shield_radius	True	-10	True	ContinuousGridWorld	ISR	-10	False	False	Individual_Deep_Q	1.0	norm_simple_mlp	False	0.05	10000000	4	True
ContinuousGridworld/75_7_5	slugs_decentralized	shields/general_shield_radius	True	-10	True	ContinuousGridWorld	ISR	-10	False	False	Individual_Deep_Q	1.0	norm_simple_mlp	False	0.05	10000000	5	True
ContinuousGridworld/76_7_6	slugs_decentralized	shields/general_shield_radius	True	-10	True	ContinuousGridWorld	ISR	-10	False	False	Individual_Deep_Q	1.0	norm_simple_mlp	False	0.05	10000000	6	True
ContinuousGridworld/77_7_7	slugs_decentralized	shields/general_shield_radius	True	-10	True	ContinuousGridWorld	ISR	-10	False	False	Individual_Deep_Q	1.0	norm_simple_mlp	False	0.05	10000000	7	True
ContinuousGridworld/78_7_8	slugs_decentralized	shields/general_shield_radius	True	-10	True	ContinuousGridWorld	ISR	-10	False	False	Individual_Deep_Q	1.0	norm_simple_mlp	False	0.05	10000000	8	True
ContinuousGridworld/79_7_9	slugs_decentralized	shields/general_shield_radius	True	-10	True	ContinuousGridWorld	ISR	-10	False	False	Individual_Deep_Q	1.0	norm_simple_mlp	False	0.05	10000000	9	True
ContinuousGridworld/80_8_0	none		True	-10	True	ContinuousGridWorld	ISR	-10	False	False	Individual_Deep_Q	1.0	norm_simple_mlp	False	0.05	10000000	0	True
ContinuousGridworld/81_8_1	none		True	-10	True	ContinuousGridWorld	ISR	-10	False	False	Individual_Deep_Q	1.0	norm_simple_mlp	False	0.05	10000000	1	True
ContinuousGridworld/82_8_2	none		True	-10	True	ContinuousGridWorld	ISR	-10	False	False	Individual_Deep_Q	1.0	norm_simple_mlp	False	0.05	10000000	2	True
ContinuousGridworld/83_8_3	none		True	-10	True	ContinuousGridWorld	ISR	-10	False	False	Individual_Deep_Q	1.0	norm_simple_mlp	False	0.05	10000000	3	True
ContinuousGridworld/84_8_4	none		True	-10	True	ContinuousGridWorld	ISR	-10	False	False	Individual_Deep_Q	1.0	norm_simple_mlp	False	0.05	10000000	4	True
ContinuousGridworld/85_8_5	none		True	-10	True	ContinuousGridWorld	ISR	-10	False	False	Individual_Deep_Q	1.0	norm_simple_mlp	False	0.05	10000000	5	True
ContinuousGridworld/86_8_6	none		True	-10	True	ContinuousGridWorld	ISR	-10	False	False	Individual_Deep_Q	1.0	norm_simple_mlp	False	0.05	10000000	6	True
ContinuousGridworld/87_8_7	none		True	-10	True	ContinuousGridWorld	ISR	-10	False	False	Individual_Deep_Q	1.0	norm_simple_mlp	False	0.05	10000000	7	True
ContinuousGridworld/88_8_8	none		True	-10	True	ContinuousGridWorld	ISR	-10	False	False	Individual_Deep_Q	1.0	norm_simple_mlp	False	0.05	10000000	8	True
ContinuousGridworld/89_8_9	none		True	-10	True	ContinuousGridWorld	ISR	-10	False	False	Individual_Deep_Q	1.0	norm_simple_mlp	False	0.05	10000000	9	True
ContinuousGridworld/90_9_0	slugs_centralized	shields/general_shield_radius	True	-10	False	ContinuousGridWorld	ISR	-10	False	False	Individual_Deep_Q	1.0	norm_simple_mlp	False	0.05	10000000	0	True
ContinuousGridworld/91_9_1	slugs_centralized	shields/general_shield_radius	True	-10	False	ContinuousGridWorld	ISR	-10	False	False	Individual_Deep_Q	1.0	norm_simple_mlp	False	0.05	10000000	1	True
ContinuousGridworld/92_9_2	slugs_centralized	shields/general_shield_radius	True	-10	False	ContinuousGridWorld	ISR	-10	False	False	Individual_Deep_Q	1.0	norm_simple_mlp	False	0.05	10000000	2	True
ContinuousGridworld/93_9_3	slugs_centralized	shields/general_shield_radius	True	-10	False	ContinuousGridWorld	ISR	-10	False	False	Individual_Deep_Q	1.0	norm_simple_mlp	False	0.05	10000000	3	True
ContinuousGridworld/94_9_4	slugs_centralized	shields/general_shield_radius	True	-10	False	ContinuousGridWorld	ISR	-10	False	False	Individual_Deep_Q	1.0	norm_simple_mlp	False	0.05	10000000	4	True
ContinuousGridworld/95_9_5	slugs_centralized	shields/general_shield_radius	True	-10	False	ContinuousGridWorld	ISR	-10	False	False	Individual_Deep_Q	1.0	norm_simple_mlp	False	0.05	10000000	5	True
ContinuousGridworld/96_9_6	slugs_centralized	shields/general_shield_radius	True	-10	False	ContinuousGridWorld	ISR	-10	False	False	Individual_Deep_Q	1.0	norm_simple_mlp	False	0.05	10000000	6	True
ContinuousGridworld/97_9_7	slugs_centralized	shields/general_shield_radius	True	-10	False	ContinuousGridWorld	ISR	-10	False	False	Individual_Deep_Q	1.0	norm_simple_mlp	False	0.05	10000000	7	True
ContinuousGridworld/98_9_8	slugs_centralized	shields/general_shield_radius	True	-10	False	ContinuousGridWorld	ISR	-10	False	False	Individual_Deep_Q	1.0	norm_simple_mlp	False	0.05	10000000	8	True
ContinuousGridworld/99_9_9	slugs_centralized	shields/general_shield_radius	True	-10	False	ContinuousGridWorld	ISR	-10	False	False	Individual_Deep_Q	1.0	norm_simple_mlp	False	0.05	10000000	9	True
ContinuousGridworld/100_10_0	slugs_decentralized	shields/general_shield_radius	True	-10	False	ContinuousGridWorld	ISR	-10	False	False	Individual_Deep_Q	1.0	norm_simple_mlp	False	0.05	10000000	0	True
ContinuousGridworld/101_10_1	slugs_decentralized	shields/general_shield_radius	True	-10	False	ContinuousGridWorld	ISR	-10	False	False	Individual_Deep_Q	1.0	norm_simple_mlp	False	0.05	10000000	1	True
ContinuousGridworld/102_10_2	slugs_decentralized	shields/general_shield_radius	True	-10	False	ContinuousGridWorld	ISR	-10	False	False	Individual_Deep_Q	1.0	norm_simple_mlp	False	0.05	10000000	2	True
ContinuousGridworld/103_10_3	slugs_decentralized	shields/general_shield_radius	True	-10	False	ContinuousGridWorld	ISR	-10	False	False	Individual_Deep_Q	1.0	norm_simple_mlp	False	0.05	10000000	3	True
ContinuousGridworld/104_10_4	slugs_decentralized	shields/general_shield_radius	True	-10	False	ContinuousGridWorld	ISR	-10	False	False	Individual_Deep_Q	1.0	norm_simple_mlp	False	0.05	10000000	4	True
ContinuousGridworld/105_10_5	slugs_decentralized	shields/general_shield_radius	True	-10	False	ContinuousGridWorld	ISR	-10	False	False	Individual_Deep_Q	1.0	norm_simple_mlp	False	0.05	10000000	5	True
ContinuousGridworld/106_10_6	slugs_decentralized	shields/general_shield_radius	True	-10	False	ContinuousGridWorld	ISR	-10	False	False	Individual_Deep_Q	1.0	norm_simple_mlp	False	0.05	10000000	6	True
ContinuousGridworld/107_10_7	slugs_decentralized	shields/general_shield_radius	True	-10	False	ContinuousGridWorld	ISR	-10	False	False	Individual_Deep_Q	1.0	norm_simple_mlp	False	0.05	10000000	7	True
ContinuousGridworld/108_10_8	slugs_decentralized	shields/general_shield_radius	True	-10	False	ContinuousGridWorld	ISR	-10	False	False	Individual_Deep_Q	1.0	norm_simple_mlp	False	0.05	10000000	8	True
ContinuousGridworld/109_10_9	slugs_decentralized	shields/general_shield_radius	True	-10	False	ContinuousGridWorld	ISR	-10	False	False	Individual_Deep_Q	1.0	norm_simple_mlp	False	0.05	10000000	9	True
ContinuousGridworld/110_11_0	none		True	-10	False	ContinuousGridWorld	ISR	-10	False	False	Individual_Deep_Q	1.0	norm_simple_mlp	False	0.05	10000000	0	True
ContinuousGridworld/111_11_1	none		True	-10	False	ContinuousGridWorld	ISR	-10	False	False	Individual_Deep_Q	1.0	norm_simple_mlp	False	0.05	10000000	1	True
ContinuousGridworld/112_11_2	none		True	-10	False	ContinuousGridWorld	ISR	-10	False	False	Individual_Deep_Q	1.0	norm_simple_mlp	False	0.05	10000000	2	True
ContinuousGridworld/113_11_3	none		True	-10	False	ContinuousGridWorld	ISR	-10	False	False	Individual_Deep_Q	1.0	norm_simple_mlp	False	0.05	10000000	3	True
ContinuousGridworld/114_11_4	none		True	-10	False	ContinuousGridWorld	ISR	-10	False	False	Individual_Deep_Q	1.0	norm_simple_mlp	False	0.05	10000000	4	True
ContinuousGridworld/115_11_5	none		True	-10	False	ContinuousGridWorld	ISR	-10	False	False	Individual_Deep_Q	1.0	norm_simple_mlp	False	0.05	10000000	5	True
ContinuousGridworld/116_11_6	none		True	-10	False	ContinuousGridWorld	ISR	-10	False	False	Individual_Deep_Q	1.0	norm_simple_mlp	False	0.05	10000000	6	True
ContinuousGridworld/117_11_7	none		True	-10	False	ContinuousGridWorld	ISR	-10	False	False	Individual_Deep_Q	1.0	norm_simple_mlp	False	0.05	10000000	7	True
ContinuousGridworld/118_11_8	none		True	-10	False	ContinuousGridWorld	ISR	-10	False	False	Individual_Deep_Q	1.0	norm_simple_mlp	False	0.05	10000000	8	True
ContinuousGridworld/119_11_9	none		True	-10	False	ContinuousGridWorld	ISR	-10	False	False	Individual_Deep_Q	1.0	norm_simple_mlp	False	0.05	10000000	9	True
ContinuousGridworld/120_12_0	slugs_centralized	shields/general_shield_radius	True	-10	True	ContinuousGridWorld	SUNY	-10	False	False	Individual_Deep_Q	1.0	norm_simple_mlp	False	0.05	10000000	0	True
ContinuousGridworld/121_12_1	slugs_centralized	shields/general_shield_radius	True	-10	True	ContinuousGridWorld	SUNY	-10	False	False	Individual_Deep_Q	1.0	norm_simple_mlp	False	0.05	10000000	1	True
ContinuousGridworld/122_12_2	slugs_centralized	shields/general_shield_radius	True	-10	True	ContinuousGridWorld	SUNY	-10	False	False	Individual_Deep_Q	1.0	norm_simple_mlp	False	0.05	10000000	2	True
ContinuousGridworld/123_12_3	slugs_centralized	shields/general_shield_radius	True	-10	True	ContinuousGridWorld	SUNY	-10	False	False	Individual_Deep_Q	1.0	norm_simple_mlp	False	0.05	10000000	3	True
ContinuousGridworld/124_12_4	slugs_centralized	shields/general_shield_radius	True	-10	True	ContinuousGridWorld	SUNY	-10	False	False	Individual_Deep_Q	1.0	norm_simple_mlp	False	0.05	10000000	4	True
ContinuousGridworld/125_12_5	slugs_centralized	shields/general_shield_radius	True	-10	True	ContinuousGridWorld	SUNY	-10	False	False	Individual_Deep_Q	1.0	norm_simple_mlp	False	0.05	10000000	5	True
ContinuousGridworld/126_12_6	slugs_centralized	shields/general_shield_radius	True	-10	True	ContinuousGridWorld	SUNY	-10	False	False	Individual_Deep_Q	1.0	norm_simple_mlp	False	0.05	10000000	6	True
ContinuousGridworld/127_12_7	slugs_centralized	shields/general_shield_radius	True	-10	True	ContinuousGridWorld	SUNY	-10	False	False	Individual_Deep_Q	1.0	norm_simple_mlp	False	0.05	10000000	7	True
ContinuousGridworld/128_12_8	slugs_centralized	shields/general_shield_radius	True	-10	True	ContinuousGridWorld	SUNY	-10	False	False	Individual_Deep_Q	1.0	norm_simple_mlp	False	0.05	10000000	8	True
ContinuousGridworld/129_12_9	slugs_centralized	shields/general_shield_radius	True	-10	True	ContinuousGridWorld	SUNY	-10	False	False	Individual_Deep_Q	1.0	norm_simple_mlp	False	0.05	10000000	9	True
ContinuousGridworld/130_13_0	slugs_decentralized	shields/general_shield_radius	True	-10	True	ContinuousGridWorld	SUNY	-10	False	False	Individual_Deep_Q	1.0	norm_simple_mlp	False	0.05	10000000	0	True
ContinuousGridworld/131_13_1	slugs_decentralized	shields/general_shield_radius	True	-10	True	ContinuousGridWorld	SUNY	-10	False	False	Individual_Deep_Q	1.0	norm_simple_mlp	False	0.05	10000000	1	True
ContinuousGridworld/132_13_2	slugs_decentralized	shields/general_shield_radius	True	-10	True	ContinuousGridWorld	SUNY	-10	False	False	Individual_Deep_Q	1.0	norm_simple_mlp	False	0.05	10000000	2	True
ContinuousGridworld/133_13_3	slugs_decentralized	shields/general_shield_radius	True	-10	True	ContinuousGridWorld	SUNY	-10	False	False	Individual_Deep_Q	1.0	norm_simple_mlp	False	0.05	10000000	3	True
ContinuousGridworld/134_13_4	slugs_decentralized	shields/general_shield_radius	True	-10	True	ContinuousGridWorld	SUNY	-10	False	False	Individual_Deep_Q	1.0	norm_simple_mlp	False	0.05	10000000	4	True
ContinuousGridworld/135_13_5	slugs_decentralized	shields/general_shield_radius	True	-10	True	ContinuousGridWorld	SUNY	-10	False	False	Individual_Deep_Q	1.0	norm_simple_mlp	False	0.05	10000000	5	True
ContinuousGridworld/136_13_6	slugs_decentralized	shields/general_shield_radius	True	-10	True	ContinuousGridWorld	SUNY	-10	False	False	Individual_Deep_Q	1.0	norm_simple_mlp	False	0.05	10000000	6	True
ContinuousGridworld/137_13_7	slugs_decentralized	shields/general_shield_radius	True	-10	True	ContinuousGridWorld	SUNY	-10	False	False	Individual_Deep_Q	1.0	norm_simple_mlp	False	0.05	10000000	7	True
ContinuousGridworld/138_13_8	slugs_decentralized	shields/general_shield_radius	True	-10	True	ContinuousGridWorld	SUNY	-10	False	False	Individual_Deep_Q	1.0	norm_simple_mlp	False	0.05	10000000	8	True
ContinuousGridworld/139_13_9	slugs_decentralized	shields/general_shield_radius	True	-10	True	ContinuousGridWorld	SUNY	-10	False	False	Individual_Deep_Q	1.0	norm_simple_mlp	False	0.05	10000000	9	True
ContinuousGridworld/140_14_0	none		True	-10	True	ContinuousGridWorld	SUNY	-10	False	False	Individual_Deep_Q	1.0	norm_simple_mlp	False	0.05	10000000	0	True
ContinuousGridworld/141_14_1	none		True	-10	True	ContinuousGridWorld	SUNY	-10	False	False	Individual_Deep_Q	1.0	norm_simple_mlp	False	0.05	10000000	1	True
ContinuousGridworld/142_14_2	none		True	-10	True	ContinuousGridWorld	SUNY	-10	False	False	Individual_Deep_Q	1.0	norm_simple_mlp	False	0.05	10000000	2	True
ContinuousGridworld/143_14_3	none		True	-10	True	ContinuousGridWorld	SUNY	-10	False	False	Individual_Deep_Q	1.0	norm_simple_mlp	False	0.05	10000000	3	True
ContinuousGridworld/144_14_4	none		True	-10	True	ContinuousGridWorld	SUNY	-10	False	False	Individual_Deep_Q	1.0	norm_simple_mlp	False	0.05	10000000	4	True
ContinuousGridworld/145_14_5	none		True	-10	True	ContinuousGridWorld	SUNY	-10	False	False	Individual_Deep_Q	1.0	norm_simple_mlp	False	0.05	10000000	5	True
ContinuousGridworld/146_14_6	none		True	-10	True	ContinuousGridWorld	SUNY	-10	False	False	Individual_Deep_Q	1.0	norm_simple_mlp	False	0.05	10000000	6	True
ContinuousGridworld/147_14_7	none		True	-10	True	ContinuousGridWorld	SUNY	-10	False	False	Individual_Deep_Q	1.0	norm_simple_mlp	False	0.05	10000000	7	True
ContinuousGridworld/148_14_8	none		True	-10	True	ContinuousGridWorld	SUNY	-10	False	False	Individual_Deep_Q	1.0	norm_simple_mlp	False	0.05	10000000	8	True
ContinuousGridworld/149_14_9	none		True	-10	True	ContinuousGridWorld	SUNY	-10	False	False	Individual_Deep_Q	1.0	norm_simple_mlp	False	0.05	10000000	9	True
ContinuousGridworld/150_15_0	slugs_centralized	shields/general_shield_radius	True	-10	False	ContinuousGridWorld	SUNY	-10	False	False	Individual_Deep_Q	1.0	norm_simple_mlp	False	0.05	10000000	0	True
ContinuousGridworld/151_15_1	slugs_centralized	shields/general_shield_radius	True	-10	False	ContinuousGridWorld	SUNY	-10	False	False	Individual_Deep_Q	1.0	norm_simple_mlp	False	0.05	10000000	1	True
ContinuousGridworld/152_15_2	slugs_centralized	shields/general_shield_radius	True	-10	False	ContinuousGridWorld	SUNY	-10	False	False	Individual_Deep_Q	1.0	norm_simple_mlp	False	0.05	10000000	2	True
ContinuousGridworld/153_15_3	slugs_centralized	shields/general_shield_radius	True	-10	False	ContinuousGridWorld	SUNY	-10	False	False	Individual_Deep_Q	1.0	norm_simple_mlp	False	0.05	10000000	3	True
ContinuousGridworld/154_15_4	slugs_centralized	shields/general_shield_radius	True	-10	False	ContinuousGridWorld	SUNY	-10	False	False	Individual_Deep_Q	1.0	norm_simple_mlp	False	0.05	10000000	4	True
ContinuousGridworld/155_15_5	slugs_centralized	shields/general_shield_radius	True	-10	False	ContinuousGridWorld	SUNY	-10	False	False	Individual_Deep_Q	1.0	norm_simple_mlp	False	0.05	10000000	5	True
ContinuousGridworld/156_15_6	slugs_centralized	shields/general_shield_radius	True	-10	False	ContinuousGridWorld	SUNY	-10	False	False	Individual_Deep_Q	1.0	norm_simple_mlp	False	0.05	10000000	6	True
ContinuousGridworld/157_15_7	slugs_centralized	shields/general_shield_radius	True	-10	False	ContinuousGridWorld	SUNY	-10	False	False	Individual_Deep_Q	1.0	norm_simple_mlp	False	0.05	10000000	7	True
ContinuousGridworld/158_15_8	slugs_centralized	shields/general_shield_radius	True	-10	False	ContinuousGridWorld	SUNY	-10	False	False	Individual_Deep_Q	1.0	norm_simple_mlp	False	0.05	10000000	8	True
ContinuousGridworld/159_15_9	slugs_centralized	shields/general_shield_radius	True	-10	False	ContinuousGridWorld	SUNY	-10	False	False	Individual_Deep_Q	1.0	norm_simple_mlp	False	0.05	10000000	9	True
ContinuousGridworld/160_16_0	slugs_decentralized	shields/general_shield_radius	True	-10	False	ContinuousGridWorld	SUNY	-10	False	False	Individual_Deep_Q	1.0	norm_simple_mlp	False	0.05	10000000	0	True
ContinuousGridworld/161_16_1	slugs_decentralized	shields/general_shield_radius	True	-10	False	ContinuousGridWorld	SUNY	-10	False	False	Individual_Deep_Q	1.0	norm_simple_mlp	False	0.05	10000000	1	True
ContinuousGridworld/162_16_2	slugs_decentralized	shields/general_shield_radius	True	-10	False	ContinuousGridWorld	SUNY	-10	False	False	Individual_Deep_Q	1.0	norm_simple_mlp	False	0.05	10000000	2	True
ContinuousGridworld/163_16_3	slugs_decentralized	shields/general_shield_radius	True	-10	False	ContinuousGridWorld	SUNY	-10	False	False	Individual_Deep_Q	1.0	norm_simple_mlp	False	0.05	10000000	3	True
ContinuousGridworld/164_16_4	slugs_decentralized	shields/general_shield_radius	True	-10	False	ContinuousGridWorld	SUNY	-10	False	False	Individual_Deep_Q	1.0	norm_simple_mlp	False	0.05	10000000	4	True
ContinuousGridworld/165_16_5	slugs_decentralized	shields/general_shield_radius	True	-10	False	ContinuousGridWorld	SUNY	-10	False	False	Individual_Deep_Q	1.0	norm_simple_mlp	False	0.05	10000000	5	True
ContinuousGridworld/166_16_6	slugs_decentralized	shields/general_shield_radius	True	-10	False	ContinuousGridWorld	SUNY	-10	False	False	Individual_Deep_Q	1.0	norm_simple_mlp	False	0.05	10000000	6	True
ContinuousGridworld/167_16_7	slugs_decentralized	shields/general_shield_radius	True	-10	False	ContinuousGridWorld	SUNY	-10	False	False	Individual_Deep_Q	1.0	norm_simple_mlp	False	0.05	10000000	7	True
ContinuousGridworld/168_16_8	slugs_decentralized	shields/general_shield_radius	True	-10	False	ContinuousGridWorld	SUNY	-10	False	False	Individual_Deep_Q	1.0	norm_simple_mlp	False	0.05	10000000	8	True
ContinuousGridworld/169_16_9	slugs_decentralized	shields/general_shield_radius	True	-10	False	ContinuousGridWorld	SUNY	-10	False	False	Individual_Deep_Q	1.0	norm_simple_mlp	False	0.05	10000000	9	True
ContinuousGridworld/170_17_0	none		True	-10	False	ContinuousGridWorld	SUNY	-10	False	False	Individual_Deep_Q	1.0	norm_simple_mlp	False	0.05	10000000	0	True
ContinuousGridworld/171_17_1	none		True	-10	False	ContinuousGridWorld	SUNY	-10	False	False	Individual_Deep_Q	1.0	norm_simple_mlp	False	0.05	10000000	1	True
ContinuousGridworld/172_17_2	none		True	-10	False	ContinuousGridWorld	SUNY	-10	False	False	Individual_Deep_Q	1.0	norm_simple_mlp	False	0.05	10000000	2	True
ContinuousGridworld/173_17_3	none		True	-10	False	ContinuousGridWorld	SUNY	-10	False	False	Individual_Deep_Q	1.0	norm_simple_mlp	False	0.05	10000000	3	True
ContinuousGridworld/174_17_4	none		True	-10	False	ContinuousGridWorld	SUNY	-10	False	False	Individual_Deep_Q	1.0	norm_simple_mlp	False	0.05	10000000	4	True
ContinuousGridworld/175_17_5	none		True	-10	False	ContinuousGridWorld	SUNY	-10	False	False	Individual_Deep_Q	1.0	norm_simple_mlp	False	0.05	10000000	5	True
ContinuousGridworld/176_17_6	none		True	-10	False	ContinuousGridWorld	SUNY	-10	False	False	Individual_Deep_Q	1.0	norm_simple_mlp	False	0.05	10000000	6	True
ContinuousGridworld/177_17_7	none		True	-10	False	ContinuousGridWorld	SUNY	-10	False	False	Individual_Deep_Q	1.0	norm_simple_mlp	False	0.05	10000000	7	True
ContinuousGridworld/178_17_8	none		True	-10	False	ContinuousGridWorld	SUNY	-10	False	False	Individual_Deep_Q	1.0	norm_simple_mlp	False	0.05	10000000	8	True
ContinuousGridworld/179_17_9	none		True	-10	False	ContinuousGridWorld	SUNY	-10	False	False	Individual_Deep_Q	1.0	norm_simple_mlp	False	0.05	10000000	9	True
ContinuousGridworld/180_18_0	slugs_centralized	shields/general_shield_radius	True	-10	True	ContinuousGridWorld	MIT	-10	False	False	Individual_Deep_Q	1.0	norm_simple_mlp	False	0.05	10000000	0	True
ContinuousGridworld/181_18_1	slugs_centralized	shields/general_shield_radius	True	-10	True	ContinuousGridWorld	MIT	-10	False	False	Individual_Deep_Q	1.0	norm_simple_mlp	False	0.05	10000000	1	True
ContinuousGridworld/182_18_2	slugs_centralized	shields/general_shield_radius	True	-10	True	ContinuousGridWorld	MIT	-10	False	False	Individual_Deep_Q	1.0	norm_simple_mlp	False	0.05	10000000	2	True
ContinuousGridworld/183_18_3	slugs_centralized	shields/general_shield_radius	True	-10	True	ContinuousGridWorld	MIT	-10	False	False	Individual_Deep_Q	1.0	norm_simple_mlp	False	0.05	10000000	3	True
ContinuousGridworld/184_18_4	slugs_centralized	shields/general_shield_radius	True	-10	True	ContinuousGridWorld	MIT	-10	False	False	Individual_Deep_Q	1.0	norm_simple_mlp	False	0.05	10000000	4	True
ContinuousGridworld/185_18_5	slugs_centralized	shields/general_shield_radius	True	-10	True	ContinuousGridWorld	MIT	-10	False	False	Individual_Deep_Q	1.0	norm_simple_mlp	False	0.05	10000000	5	True
ContinuousGridworld/186_18_6	slugs_centralized	shields/general_shield_radius	True	-10	True	ContinuousGridWorld	MIT	-10	False	False	Individual_Deep_Q	1.0	norm_simple_mlp	False	0.05	10000000	6	True
ContinuousGridworld/187_18_7	slugs_centralized	shields/general_shield_radius	True	-10	True	ContinuousGridWorld	MIT	-10	False	False	Individual_Deep_Q	1.0	norm_simple_mlp	False	0.05	10000000	7	True
ContinuousGridworld/188_18_8	slugs_centralized	shields/general_shield_radius	True	-10	True	ContinuousGridWorld	MIT	-10	False	False	Individual_Deep_Q	1.0	norm_simple_mlp	False	0.05	10000000	8	True
ContinuousGridworld/189_18_9	slugs_centralized	shields/general_shield_radius	True	-10	True	ContinuousGridWorld	MIT	-10	False	False	Individual_Deep_Q	1.0	norm_simple_mlp	False	0.05	10000000	9	True
ContinuousGridworld/190_19_0	slugs_decentralized	shields/general_shield_radius	True	-10	True	ContinuousGridWorld	MIT	-10	False	False	Individual_Deep_Q	1.0	norm_simple_mlp	False	0.05	10000000	0	True
ContinuousGridworld/191_19_1	slugs_decentralized	shields/general_shield_radius	True	-10	True	ContinuousGridWorld	MIT	-10	False	False	Individual_Deep_Q	1.0	norm_simple_mlp	False	0.05	10000000	1	True
ContinuousGridworld/192_19_2	slugs_decentralized	shields/general_shield_radius	True	-10	True	ContinuousGridWorld	MIT	-10	False	False	Individual_Deep_Q	1.0	norm_simple_mlp	False	0.05	10000000	2	True
ContinuousGridworld/193_19_3	slugs_decentralized	shields/general_shield_radius	True	-10	True	ContinuousGridWorld	MIT	-10	False	False	Individual_Deep_Q	1.0	norm_simple_mlp	False	0.05	10000000	3	True
ContinuousGridworld/194_19_4	slugs_decentralized	shields/general_shield_radius	True	-10	True	ContinuousGridWorld	MIT	-10	False	False	Individual_Deep_Q	1.0	norm_simple_mlp	False	0.05	10000000	4	True
ContinuousGridworld/195_19_5	slugs_decentralized	shields/general_shield_radius	True	-10	True	ContinuousGridWorld	MIT	-10	False	False	Individual_Deep_Q	1.0	norm_simple_mlp	False	0.05	10000000	5	True
ContinuousGridworld/196_19_6	slugs_decentralized	shields/general_shield_radius	True	-10	True	ContinuousGridWorld	MIT	-10	False	False	Individual_Deep_Q	1.0	norm_simple_mlp	False	0.05	10000000	6	True
ContinuousGridworld/197_19_7	slugs_decentralized	shields/general_shield_radius	True	-10	True	ContinuousGridWorld	MIT	-10	False	False	Individual_Deep_Q	1.0	norm_simple_mlp	False	0.05	10000000	7	True
ContinuousGridworld/198_19_8	slugs_decentralized	shields/general_shield_radius	True	-10	True	ContinuousGridWorld	MIT	-10	False	False	Individual_Deep_Q	1.0	norm_simple_mlp	False	0.05	10000000	8	True
ContinuousGridworld/199_19_9	slugs_decentralized	shields/general_shield_radius	True	-10	True	ContinuousGridWorld	MIT	-10	False	False	Individual_Deep_Q	1.0	norm_simple_mlp	False	0.05	10000000	9	True
ContinuousGridworld/200_20_0	none		True	-10	True	ContinuousGridWorld	MIT	-10	False	False	Individual_Deep_Q	1.0	norm_simple_mlp	False	0.05	10000000	0	True
ContinuousGridworld/201_20_1	none		True	-10	True	ContinuousGridWorld	MIT	-10	False	False	Individual_Deep_Q	1.0	norm_simple_mlp	False	0.05	10000000	1	True
ContinuousGridworld/202_20_2	none		True	-10	True	ContinuousGridWorld	MIT	-10	False	False	Individual_Deep_Q	1.0	norm_simple_mlp	False	0.05	10000000	2	True
ContinuousGridworld/203_20_3	none		True	-10	True	ContinuousGridWorld	MIT	-10	False	False	Individual_Deep_Q	1.0	norm_simple_mlp	False	0.05	10000000	3	True
ContinuousGridworld/204_20_4	none		True	-10	True	ContinuousGridWorld	MIT	-10	False	False	Individual_Deep_Q	1.0	norm_simple_mlp	False	0.05	10000000	4	True
ContinuousGridworld/205_20_5	none		True	-10	True	ContinuousGridWorld	MIT	-10	False	False	Individual_Deep_Q	1.0	norm_simple_mlp	False	0.05	10000000	5	True
ContinuousGridworld/206_20_6	none		True	-10	True	ContinuousGridWorld	MIT	-10	False	False	Individual_Deep_Q	1.0	norm_simple_mlp	False	0.05	10000000	6	True
ContinuousGridworld/207_20_7	none		True	-10	True	ContinuousGridWorld	MIT	-10	False	False	Individual_Deep_Q	1.0	norm_simple_mlp	False	0.05	10000000	7	True
ContinuousGridworld/208_20_8	none		True	-10	True	ContinuousGridWorld	MIT	-10	False	False	Individual_Deep_Q	1.0	norm_simple_mlp	False	0.05	10000000	8	True
ContinuousGridworld/209_20_9	none		True	-10	True	ContinuousGridWorld	MIT	-10	False	False	Individual_Deep_Q	1.0	norm_simple_mlp	False	0.05	10000000	9	True
ContinuousGridworld/210_21_0	slugs_centralized	shields/general_shield_radius	True	-10	False	ContinuousGridWorld	MIT	-10	False	False	Individual_Deep_Q	1.0	norm_simple_mlp	False	0.05	10000000	0	True
ContinuousGridworld/211_21_1	slugs_centralized	shields/general_shield_radius	True	-10	False	ContinuousGridWorld	MIT	-10	False	False	Individual_Deep_Q	1.0	norm_simple_mlp	False	0.05	10000000	1	True
ContinuousGridworld/212_21_2	slugs_centralized	shields/general_shield_radius	True	-10	False	ContinuousGridWorld	MIT	-10	False	False	Individual_Deep_Q	1.0	norm_simple_mlp	False	0.05	10000000	2	True
ContinuousGridworld/213_21_3	slugs_centralized	shields/general_shield_radius	True	-10	False	ContinuousGridWorld	MIT	-10	False	False	Individual_Deep_Q	1.0	norm_simple_mlp	False	0.05	10000000	3	True
ContinuousGridworld/214_21_4	slugs_centralized	shields/general_shield_radius	True	-10	False	ContinuousGridWorld	MIT	-10	False	False	Individual_Deep_Q	1.0	norm_simple_mlp	False	0.05	10000000	4	True
ContinuousGridworld/215_21_5	slugs_centralized	shields/general_shield_radius	True	-10	False	ContinuousGridWorld	MIT	-10	False	False	Individual_Deep_Q	1.0	norm_simple_mlp	False	0.05	10000000	5	True
ContinuousGridworld/216_21_6	slugs_centralized	shields/general_shield_radius	True	-10	False	ContinuousGridWorld	MIT	-10	False	False	Individual_Deep_Q	1.0	norm_simple_mlp	False	0.05	10000000	6	True
ContinuousGridworld/217_21_7	slugs_centralized	shields/general_shield_radius	True	-10	False	ContinuousGridWorld	MIT	-10	False	False	Individual_Deep_Q	1.0	norm_simple_mlp	False	0.05	10000000	7	True
ContinuousGridworld/218_21_8	slugs_centralized	shields/general_shield_radius	True	-10	False	ContinuousGridWorld	MIT	-10	False	False	Individual_Deep_Q	1.0	norm_simple_mlp	False	0.05	10000000	8	True
ContinuousGridworld/219_21_9	slugs_centralized	shields/general_shield_radius	True	-10	False	ContinuousGridWorld	MIT	-10	False	False	Individual_Deep_Q	1.0	norm_simple_mlp	False	0.05	10000000	9	True
ContinuousGridworld/220_22_0	slugs_decentralized	shields/general_shield_radius	True	-10	False	ContinuousGridWorld	MIT	-10	False	False	Individual_Deep_Q	1.0	norm_simple_mlp	False	0.05	10000000	0	True
ContinuousGridworld/221_22_1	slugs_decentralized	shields/general_shield_radius	True	-10	False	ContinuousGridWorld	MIT	-10	False	False	Individual_Deep_Q	1.0	norm_simple_mlp	False	0.05	10000000	1	True
ContinuousGridworld/222_22_2	slugs_decentralized	shields/general_shield_radius	True	-10	False	ContinuousGridWorld	MIT	-10	False	False	Individual_Deep_Q	1.0	norm_simple_mlp	False	0.05	10000000	2	True
ContinuousGridworld/223_22_3	slugs_decentralized	shields/general_shield_radius	True	-10	False	ContinuousGridWorld	MIT	-10	False	False	Individual_Deep_Q	1.0	norm_simple_mlp	False	0.05	10000000	3	True
ContinuousGridworld/224_22_4	slugs_decentralized	shields/general_shield_radius	True	-10	False	ContinuousGridWorld	MIT	-10	False	False	Individual_Deep_Q	1.0	norm_simple_mlp	False	0.05	10000000	4	True
ContinuousGridworld/225_22_5	slugs_decentralized	shields/general_shield_radius	True	-10	False	ContinuousGridWorld	MIT	-10	False	False	Individual_Deep_Q	1.0	norm_simple_mlp	False	0.05	10000000	5	True
ContinuousGridworld/226_22_6	slugs_decentralized	shields/general_shield_radius	True	-10	False	ContinuousGridWorld	MIT	-10	False	False	Individual_Deep_Q	1.0	norm_simple_mlp	False	0.05	10000000	6	True
ContinuousGridworld/227_22_7	slugs_decentralized	shields/general_shield_radius	True	-10	False	ContinuousGridWorld	MIT	-10	False	False	Individual_Deep_Q	1.0	norm_simple_mlp	False	0.05	10000000	7	True
ContinuousGridworld/228_22_8	slugs_decentralized	shields/general_shield_radius	True	-10	False	ContinuousGridWorld	MIT	-10	False	False	Individual_Deep_Q	1.0	norm_simple_mlp	False	0.05	10000000	8	True
ContinuousGridworld/229_22_9	slugs_decentralized	shields/general_shield_radius	True	-10	False	ContinuousGridWorld	MIT	-10	False	False	Individual_Deep_Q	1.0	norm_simple_mlp	False	0.05	10000000	9	True
ContinuousGridworld/230_23_0	none		True	-10	False	ContinuousGridWorld	MIT	-10	False	False	Individual_Deep_Q	1.0	norm_simple_mlp	False	0.05	10000000	0	True
ContinuousGridworld/231_23_1	none		True	-10	False	ContinuousGridWorld	MIT	-10	False	False	Individual_Deep_Q	1.0	norm_simple_mlp	False	0.05	10000000	1	True
ContinuousGridworld/232_23_2	none		True	-10	False	ContinuousGridWorld	MIT	-10	False	False	Individual_Deep_Q	1.0	norm_simple_mlp	False	0.05	10000000	2	True
ContinuousGridworld/233_23_3	none		True	-10	False	ContinuousGridWorld	MIT	-10	False	False	Individual_Deep_Q	1.0	norm_simple_mlp	False	0.05	10000000	3	True
ContinuousGridworld/234_23_4	none		True	-10	False	ContinuousGridWorld	MIT	-10	False	False	Individual_Deep_Q	1.0	norm_simple_mlp	False	0.05	10000000	4	True
ContinuousGridworld/235_23_5	none		True	-10	False	ContinuousGridWorld	MIT	-10	False	False	Individual_Deep_Q	1.0	norm_simple_mlp	False	0.05	10000000	5	True
ContinuousGridworld/236_23_6	none		True	-10	False	ContinuousGridWorld	MIT	-10	False	False	Individual_Deep_Q	1.0	norm_simple_mlp	False	0.05	10000000	6	True
ContinuousGridworld/237_23_7	none		True	-10	False	ContinuousGridWorld	MIT	-10	False	False	Individual_Deep_Q	1.0	norm_simple_mlp	False	0.05	10000000	7	True
ContinuousGridworld/238_23_8	none		True	-10	False	ContinuousGridWorld	MIT	-10	False	False	Individual_Deep_Q	1.0	norm_simple_mlp	False	0.05	10000000	8	True
ContinuousGridworld/239_23_9	none		True	-10	False	ContinuousGridWorld	MIT	-10	False	False	Individual_Deep_Q	1.0	norm_simple_mlp	False	0.05	10000000	9	True
