# Supplementary material
Source: ML conference proceedings conference paper supplement (https://proceedings.neurips.cc/paper_files/paper/2022/hash/57444e14ecd9e2c8f603b4f012ce3811-Abstract.html)
Supplement: Supplementary file 1 [file 57444e14ecd9e2c8f603b4f012ce3811-Supplemental-Conference.zip › 3410_shield_decentralization_for_sa-Supplementary Material/parallel_configs/debug1.csv]

run_name	shield	rew_modifier	randomize_starts
q_learning_batch_test_1/0_Pentagon_centralized_var_0	centralized		T
q_learning_batch_test_1/1_Pentagon_centralized_var_1	centralized		T
q_learning_batch_test_1/2_Pentagon_centralized_var_2	centralized		T
q_learning_batch_test_1/3_Pentagon_centralized_var_3	centralized		T
q_learning_batch_test_1/4_Pentagon_centralized_var_4	centralized		T
q_learning_batch_test_1/5_Pentagon_centralized_var_5	centralized		T
q_learning_batch_test_1/6_Pentagon_centralized_var_6	centralized		T
q_learning_batch_test_1/7_Pentagon_centralized_var_7	centralized		T
q_learning_batch_test_1/8_Pentagon_centralized_var_8	centralized		T
q_learning_batch_test_1/9_Pentagon_centralized_var_9	centralized		T
q_learning_batch_test_1/10_Pentagon_decentralized_var_0	decentralized		T
q_learning_batch_test_1/11_Pentagon_decentralized_var_1	decentralized		T
q_learning_batch_test_1/12_Pentagon_decentralized_var_2	decentralized		T
q_learning_batch_test_1/13_Pentagon_decentralized_var_3	decentralized		T
q_learning_batch_test_1/14_Pentagon_decentralized_var_4	decentralized		T
q_learning_batch_test_1/15_Pentagon_decentralized_var_5	decentralized		T
q_learning_batch_test_1/16_Pentagon_decentralized_var_6	decentralized		T
q_learning_batch_test_1/17_Pentagon_decentralized_var_7	decentralized		T
q_learning_batch_test_1/18_Pentagon_decentralized_var_8	decentralized		T
q_learning_batch_test_1/19_Pentagon_decentralized_var_9	decentralized		T
q_learning_batch_test_1/20_Pentagon_none_var_0	none		T
q_learning_batch_test_1/21_Pentagon_none_var_1	none		T
q_learning_batch_test_1/22_Pentagon_none_var_2	none		T
q_learning_batch_test_1/23_Pentagon_none_var_3	none		T
q_learning_batch_test_1/24_Pentagon_none_var_4	none		T
q_learning_batch_test_1/25_Pentagon_none_var_5	none		T
q_learning_batch_test_1/26_Pentagon_none_var_6	none		T
q_learning_batch_test_1/27_Pentagon_none_var_7	none		T
q_learning_batch_test_1/28_Pentagon_none_var_8	none		T
q_learning_batch_test_1/29_Pentagon_none_var_9	none		T
q_learning_batch_test_1/30_Pentagon_neg_rew_var_0	neg_rew	-100	T
q_learning_batch_test_1/31_Pentagon_neg_rew_var_1	neg_rew	-100	T
q_learning_batch_test_1/32_Pentagon_neg_rew_var_2	neg_rew	-100	T
q_learning_batch_test_1/33_Pentagon_neg_rew_var_3	neg_rew	-100	T
q_learning_batch_test_1/34_Pentagon_neg_rew_var_4	neg_rew	-100	T
q_learning_batch_test_1/35_Pentagon_neg_rew_var_5	neg_rew	-100	T
q_learning_batch_test_1/36_Pentagon_neg_rew_var_6	neg_rew	-100	T
q_learning_batch_test_1/37_Pentagon_neg_rew_var_7	neg_rew	-100	T
q_learning_batch_test_1/38_Pentagon_neg_rew_var_8	neg_rew	-100	T
q_learning_batch_test_1/39_Pentagon_neg_rew_var_9	neg_rew	-100	T
q_learning_batch_test_1/40_Pentagon_centralized_fixed_0	centralized
q_learning_batch_test_1/41_Pentagon_centralized_fixed_1	centralized
q_learning_batch_test_1/42_Pentagon_centralized_fixed_2	centralized
q_learning_batch_test_1/43_Pentagon_centralized_fixed_3	centralized
q_learning_batch_test_1/44_Pentagon_centralized_fixed_4	centralized
q_learning_batch_test_1/45_Pentagon_centralized_fixed_5	centralized
q_learning_batch_test_1/46_Pentagon_centralized_fixed_6	centralized
q_learning_batch_test_1/47_Pentagon_centralized_fixed_7	centralized
q_learning_batch_test_1/48_Pentagon_centralized_fixed_8	centralized
q_learning_batch_test_1/49_Pentagon_centralized_fixed_9	centralized
q_learning_batch_test_1/50_Pentagon_decentralized_fixed_0	decentralized
q_learning_batch_test_1/51_Pentagon_decentralized_fixed_1	decentralized
q_learning_batch_test_1/52_Pentagon_decentralized_fixed_2	decentralized
q_learning_batch_test_1/53_Pentagon_decentralized_fixed_3	decentralized
q_learning_batch_test_1/54_Pentagon_decentralized_fixed_4	decentralized
q_learning_batch_test_1/55_Pentagon_decentralized_fixed_5	decentralized
q_learning_batch_test_1/56_Pentagon_decentralized_fixed_6	decentralized
q_learning_batch_test_1/57_Pentagon_decentralized_fixed_7	decentralized
q_learning_batch_test_1/58_Pentagon_decentralized_fixed_8	decentralized
q_learning_batch_test_1/59_Pentagon_decentralized_fixed_9	decentralized
q_learning_batch_test_1/60_Pentagon_none_fixed_0	none
q_learning_batch_test_1/61_Pentagon_none_fixed_1	none
q_learning_batch_test_1/62_Pentagon_none_fixed_2	none
q_learning_batch_test_1/63_Pentagon_none_fixed_3	none
q_learning_batch_test_1/64_Pentagon_none_fixed_4	none
q_learning_batch_test_1/65_Pentagon_none_fixed_5	none
q_learning_batch_test_1/66_Pentagon_none_fixed_6	none
q_learning_batch_test_1/67_Pentagon_none_fixed_7	none
q_learning_batch_test_1/68_Pentagon_none_fixed_8	none
q_learning_batch_test_1/69_Pentagon_none_fixed_9	none
q_learning_batch_test_1/70_Pentagon_neg_rew_fixed_0	neg_rew	-100
q_learning_batch_test_1/71_Pentagon_neg_rew_fixed_1	neg_rew	-100
q_learning_batch_test_1/72_Pentagon_neg_rew_fixed_2	neg_rew	-100
q_learning_batch_test_1/73_Pentagon_neg_rew_fixed_3	neg_rew	-100
q_learning_batch_test_1/74_Pentagon_neg_rew_fixed_4	neg_rew	-100
q_learning_batch_test_1/75_Pentagon_neg_rew_fixed_5	neg_rew	-100
q_learning_batch_test_1/76_Pentagon_neg_rew_fixed_6	neg_rew	-100
q_learning_batch_test_1/77_Pentagon_neg_rew_fixed_7	neg_rew	-100
q_learning_batch_test_1/78_Pentagon_neg_rew_fixed_8	neg_rew	-100
q_learning_batch_test_1/79_Pentagon_neg_rew_fixed_9	neg_rew	-100
