# Supplementary material
Source: ML conference proceedings conference paper supplement (https://proceedings.neurips.cc/paper_files/paper/2022/hash/57444e14ecd9e2c8f603b4f012ce3811-Abstract.html)
Supplement: Supplementary file 1 [file 57444e14ecd9e2c8f603b4f012ce3811-Supplemental-Conference.zip › 3410_shield_decentralization_for_sa-Supplementary Material/parallel_configs/IndivQLearningParticleDNNEval.csv]

run_name	shield	shield_specification	punish_unsafe_orig_action	punish_unsafe_orig_action_modifier	randomize_starts	map_type	particle_agents_observe_momentum	particle_terminate_on_collision	particle_world_size	particle_collision_penalty	learner_type	learner_anneal_eps_start	learner_deep_network_model	learner_transform_one_hot	learner_anneal_eps_finish	max_total_steps	seed	skip_training	evaluation_run_name	evaluation_shield	evaluation_shield_specification	learner_evaluation_epsilon
IndivQLearningParticleDNN/0_0_0	slugs_centralized	shields/momentum_shield	True	-10	True	ParticleMomentum	True	False	10	-30	Individual_Deep_Q	1.0	simple_mlp	True	0.05	2500000	0	True	IndivQLearningParticleDNN/0_0_0_slugs_centralized	slugs_centralized	shields/momentum_shield	0.05
IndivQLearningParticleDNN/0_0_0	slugs_centralized	shields/momentum_shield	True	-10	True	ParticleMomentum	True	False	10	-30	Individual_Deep_Q	1.0	simple_mlp	True	0.05	2500000	0	True	IndivQLearningParticleDNN/0_0_0_slugs_decentralized	slugs_decentralized	shields/momentum_shield	0.05
IndivQLearningParticleDNN/0_0_0	slugs_centralized	shields/momentum_shield	True	-10	True	ParticleMomentum	True	False	10	-30	Individual_Deep_Q	1.0	simple_mlp	True	0.05	2500000	0	True	IndivQLearningParticleDNN/0_0_0_none	none		0.05
IndivQLearningParticleDNN/1_0_1	slugs_centralized	shields/momentum_shield	True	-10	True	ParticleMomentum	True	False	10	-30	Individual_Deep_Q	1.0	simple_mlp	True	0.05	2500000	1	True	IndivQLearningParticleDNN/1_0_1_slugs_centralized	slugs_centralized	shields/momentum_shield	0.05
IndivQLearningParticleDNN/1_0_1	slugs_centralized	shields/momentum_shield	True	-10	True	ParticleMomentum	True	False	10	-30	Individual_Deep_Q	1.0	simple_mlp	True	0.05	2500000	1	True	IndivQLearningParticleDNN/1_0_1_slugs_decentralized	slugs_decentralized	shields/momentum_shield	0.05
IndivQLearningParticleDNN/1_0_1	slugs_centralized	shields/momentum_shield	True	-10	True	ParticleMomentum	True	False	10	-30	Individual_Deep_Q	1.0	simple_mlp	True	0.05	2500000	1	True	IndivQLearningParticleDNN/1_0_1_none	none		0.05
IndivQLearningParticleDNN/2_0_2	slugs_centralized	shields/momentum_shield	True	-10	True	ParticleMomentum	True	False	10	-30	Individual_Deep_Q	1.0	simple_mlp	True	0.05	2500000	2	True	IndivQLearningParticleDNN/2_0_2_slugs_centralized	slugs_centralized	shields/momentum_shield	0.05
IndivQLearningParticleDNN/2_0_2	slugs_centralized	shields/momentum_shield	True	-10	True	ParticleMomentum	True	False	10	-30	Individual_Deep_Q	1.0	simple_mlp	True	0.05	2500000	2	True	IndivQLearningParticleDNN/2_0_2_slugs_decentralized	slugs_decentralized	shields/momentum_shield	0.05
IndivQLearningParticleDNN/2_0_2	slugs_centralized	shields/momentum_shield	True	-10	True	ParticleMomentum	True	False	10	-30	Individual_Deep_Q	1.0	simple_mlp	True	0.05	2500000	2	True	IndivQLearningParticleDNN/2_0_2_none	none		0.05
IndivQLearningParticleDNN/3_0_3	slugs_centralized	shields/momentum_shield	True	-10	True	ParticleMomentum	True	False	10	-30	Individual_Deep_Q	1.0	simple_mlp	True	0.05	2500000	3	True	IndivQLearningParticleDNN/3_0_3_slugs_centralized	slugs_centralized	shields/momentum_shield	0.05
IndivQLearningParticleDNN/3_0_3	slugs_centralized	shields/momentum_shield	True	-10	True	ParticleMomentum	True	False	10	-30	Individual_Deep_Q	1.0	simple_mlp	True	0.05	2500000	3	True	IndivQLearningParticleDNN/3_0_3_slugs_decentralized	slugs_decentralized	shields/momentum_shield	0.05
IndivQLearningParticleDNN/3_0_3	slugs_centralized	shields/momentum_shield	True	-10	True	ParticleMomentum	True	False	10	-30	Individual_Deep_Q	1.0	simple_mlp	True	0.05	2500000	3	True	IndivQLearningParticleDNN/3_0_3_none	none		0.05
IndivQLearningParticleDNN/4_0_4	slugs_centralized	shields/momentum_shield	True	-10	True	ParticleMomentum	True	False	10	-30	Individual_Deep_Q	1.0	simple_mlp	True	0.05	2500000	4	True	IndivQLearningParticleDNN/4_0_4_slugs_centralized	slugs_centralized	shields/momentum_shield	0.05
IndivQLearningParticleDNN/4_0_4	slugs_centralized	shields/momentum_shield	True	-10	True	ParticleMomentum	True	False	10	-30	Individual_Deep_Q	1.0	simple_mlp	True	0.05	2500000	4	True	IndivQLearningParticleDNN/4_0_4_slugs_decentralized	slugs_decentralized	shields/momentum_shield	0.05
IndivQLearningParticleDNN/4_0_4	slugs_centralized	shields/momentum_shield	True	-10	True	ParticleMomentum	True	False	10	-30	Individual_Deep_Q	1.0	simple_mlp	True	0.05	2500000	4	True	IndivQLearningParticleDNN/4_0_4_none	none		0.05
IndivQLearningParticleDNN/5_0_5	slugs_centralized	shields/momentum_shield	True	-10	True	ParticleMomentum	True	False	10	-30	Individual_Deep_Q	1.0	simple_mlp	True	0.05	2500000	5	True	IndivQLearningParticleDNN/5_0_5_slugs_centralized	slugs_centralized	shields/momentum_shield	0.05
IndivQLearningParticleDNN/5_0_5	slugs_centralized	shields/momentum_shield	True	-10	True	ParticleMomentum	True	False	10	-30	Individual_Deep_Q	1.0	simple_mlp	True	0.05	2500000	5	True	IndivQLearningParticleDNN/5_0_5_slugs_decentralized	slugs_decentralized	shields/momentum_shield	0.05
IndivQLearningParticleDNN/5_0_5	slugs_centralized	shields/momentum_shield	True	-10	True	ParticleMomentum	True	False	10	-30	Individual_Deep_Q	1.0	simple_mlp	True	0.05	2500000	5	True	IndivQLearningParticleDNN/5_0_5_none	none		0.05
IndivQLearningParticleDNN/6_0_6	slugs_centralized	shields/momentum_shield	True	-10	True	ParticleMomentum	True	False	10	-30	Individual_Deep_Q	1.0	simple_mlp	True	0.05	2500000	6	True	IndivQLearningParticleDNN/6_0_6_slugs_centralized	slugs_centralized	shields/momentum_shield	0.05
IndivQLearningParticleDNN/6_0_6	slugs_centralized	shields/momentum_shield	True	-10	True	ParticleMomentum	True	False	10	-30	Individual_Deep_Q	1.0	simple_mlp	True	0.05	2500000	6	True	IndivQLearningParticleDNN/6_0_6_slugs_decentralized	slugs_decentralized	shields/momentum_shield	0.05
IndivQLearningParticleDNN/6_0_6	slugs_centralized	shields/momentum_shield	True	-10	True	ParticleMomentum	True	False	10	-30	Individual_Deep_Q	1.0	simple_mlp	True	0.05	2500000	6	True	IndivQLearningParticleDNN/6_0_6_none	none		0.05
IndivQLearningParticleDNN/7_0_7	slugs_centralized	shields/momentum_shield	True	-10	True	ParticleMomentum	True	False	10	-30	Individual_Deep_Q	1.0	simple_mlp	True	0.05	2500000	7	True	IndivQLearningParticleDNN/7_0_7_slugs_centralized	slugs_centralized	shields/momentum_shield	0.05
IndivQLearningParticleDNN/7_0_7	slugs_centralized	shields/momentum_shield	True	-10	True	ParticleMomentum	True	False	10	-30	Individual_Deep_Q	1.0	simple_mlp	True	0.05	2500000	7	True	IndivQLearningParticleDNN/7_0_7_slugs_decentralized	slugs_decentralized	shields/momentum_shield	0.05
IndivQLearningParticleDNN/7_0_7	slugs_centralized	shields/momentum_shield	True	-10	True	ParticleMomentum	True	False	10	-30	Individual_Deep_Q	1.0	simple_mlp	True	0.05	2500000	7	True	IndivQLearningParticleDNN/7_0_7_none	none		0.05
IndivQLearningParticleDNN/8_0_8	slugs_centralized	shields/momentum_shield	True	-10	True	ParticleMomentum	True	False	10	-30	Individual_Deep_Q	1.0	simple_mlp	True	0.05	2500000	8	True	IndivQLearningParticleDNN/8_0_8_slugs_centralized	slugs_centralized	shields/momentum_shield	0.05
IndivQLearningParticleDNN/8_0_8	slugs_centralized	shields/momentum_shield	True	-10	True	ParticleMomentum	True	False	10	-30	Individual_Deep_Q	1.0	simple_mlp	True	0.05	2500000	8	True	IndivQLearningParticleDNN/8_0_8_slugs_decentralized	slugs_decentralized	shields/momentum_shield	0.05
IndivQLearningParticleDNN/8_0_8	slugs_centralized	shields/momentum_shield	True	-10	True	ParticleMomentum	True	False	10	-30	Individual_Deep_Q	1.0	simple_mlp	True	0.05	2500000	8	True	IndivQLearningParticleDNN/8_0_8_none	none		0.05
IndivQLearningParticleDNN/9_0_9	slugs_centralized	shields/momentum_shield	True	-10	True	ParticleMomentum	True	False	10	-30	Individual_Deep_Q	1.0	simple_mlp	True	0.05	2500000	9	True	IndivQLearningParticleDNN/9_0_9_slugs_centralized	slugs_centralized	shields/momentum_shield	0.05
IndivQLearningParticleDNN/9_0_9	slugs_centralized	shields/momentum_shield	True	-10	True	ParticleMomentum	True	False	10	-30	Individual_Deep_Q	1.0	simple_mlp	True	0.05	2500000	9	True	IndivQLearningParticleDNN/9_0_9_slugs_decentralized	slugs_decentralized	shields/momentum_shield	0.05
IndivQLearningParticleDNN/9_0_9	slugs_centralized	shields/momentum_shield	True	-10	True	ParticleMomentum	True	False	10	-30	Individual_Deep_Q	1.0	simple_mlp	True	0.05	2500000	9	True	IndivQLearningParticleDNN/9_0_9_none	none		0.05
IndivQLearningParticleDNN/10_1_0	slugs_centralized	shields/momentum_shield	True	-10	True	ParticleMomentum	True	False	10	-30	Individual_Deep_Q	1.0	simple_mlp	False	0.05	2500000	0	True	IndivQLearningParticleDNN/10_1_0_slugs_centralized	slugs_centralized	shields/momentum_shield	0.05
IndivQLearningParticleDNN/10_1_0	slugs_centralized	shields/momentum_shield	True	-10	True	ParticleMomentum	True	False	10	-30	Individual_Deep_Q	1.0	simple_mlp	False	0.05	2500000	0	True	IndivQLearningParticleDNN/10_1_0_slugs_decentralized	slugs_decentralized	shields/momentum_shield	0.05
IndivQLearningParticleDNN/10_1_0	slugs_centralized	shields/momentum_shield	True	-10	True	ParticleMomentum	True	False	10	-30	Individual_Deep_Q	1.0	simple_mlp	False	0.05	2500000	0	True	IndivQLearningParticleDNN/10_1_0_none	none		0.05
IndivQLearningParticleDNN/11_1_1	slugs_centralized	shields/momentum_shield	True	-10	True	ParticleMomentum	True	False	10	-30	Individual_Deep_Q	1.0	simple_mlp	False	0.05	2500000	1	True	IndivQLearningParticleDNN/11_1_1_slugs_centralized	slugs_centralized	shields/momentum_shield	0.05
IndivQLearningParticleDNN/11_1_1	slugs_centralized	shields/momentum_shield	True	-10	True	ParticleMomentum	True	False	10	-30	Individual_Deep_Q	1.0	simple_mlp	False	0.05	2500000	1	True	IndivQLearningParticleDNN/11_1_1_slugs_decentralized	slugs_decentralized	shields/momentum_shield	0.05
IndivQLearningParticleDNN/11_1_1	slugs_centralized	shields/momentum_shield	True	-10	True	ParticleMomentum	True	False	10	-30	Individual_Deep_Q	1.0	simple_mlp	False	0.05	2500000	1	True	IndivQLearningParticleDNN/11_1_1_none	none		0.05
IndivQLearningParticleDNN/12_1_2	slugs_centralized	shields/momentum_shield	True	-10	True	ParticleMomentum	True	False	10	-30	Individual_Deep_Q	1.0	simple_mlp	False	0.05	2500000	2	True	IndivQLearningParticleDNN/12_1_2_slugs_centralized	slugs_centralized	shields/momentum_shield	0.05
IndivQLearningParticleDNN/12_1_2	slugs_centralized	shields/momentum_shield	True	-10	True	ParticleMomentum	True	False	10	-30	Individual_Deep_Q	1.0	simple_mlp	False	0.05	2500000	2	True	IndivQLearningParticleDNN/12_1_2_slugs_decentralized	slugs_decentralized	shields/momentum_shield	0.05
IndivQLearningParticleDNN/12_1_2	slugs_centralized	shields/momentum_shield	True	-10	True	ParticleMomentum	True	False	10	-30	Individual_Deep_Q	1.0	simple_mlp	False	0.05	2500000	2	True	IndivQLearningParticleDNN/12_1_2_none	none		0.05
IndivQLearningParticleDNN/13_1_3	slugs_centralized	shields/momentum_shield	True	-10	True	ParticleMomentum	True	False	10	-30	Individual_Deep_Q	1.0	simple_mlp	False	0.05	2500000	3	True	IndivQLearningParticleDNN/13_1_3_slugs_centralized	slugs_centralized	shields/momentum_shield	0.05
IndivQLearningParticleDNN/13_1_3	slugs_centralized	shields/momentum_shield	True	-10	True	ParticleMomentum	True	False	10	-30	Individual_Deep_Q	1.0	simple_mlp	False	0.05	2500000	3	True	IndivQLearningParticleDNN/13_1_3_slugs_decentralized	slugs_decentralized	shields/momentum_shield	0.05
IndivQLearningParticleDNN/13_1_3	slugs_centralized	shields/momentum_shield	True	-10	True	ParticleMomentum	True	False	10	-30	Individual_Deep_Q	1.0	simple_mlp	False	0.05	2500000	3	True	IndivQLearningParticleDNN/13_1_3_none	none		0.05
IndivQLearningParticleDNN/14_1_4	slugs_centralized	shields/momentum_shield	True	-10	True	ParticleMomentum	True	False	10	-30	Individual_Deep_Q	1.0	simple_mlp	False	0.05	2500000	4	True	IndivQLearningParticleDNN/14_1_4_slugs_centralized	slugs_centralized	shields/momentum_shield	0.05
IndivQLearningParticleDNN/14_1_4	slugs_centralized	shields/momentum_shield	True	-10	True	ParticleMomentum	True	False	10	-30	Individual_Deep_Q	1.0	simple_mlp	False	0.05	2500000	4	True	IndivQLearningParticleDNN/14_1_4_slugs_decentralized	slugs_decentralized	shields/momentum_shield	0.05
IndivQLearningParticleDNN/14_1_4	slugs_centralized	shields/momentum_shield	True	-10	True	ParticleMomentum	True	False	10	-30	Individual_Deep_Q	1.0	simple_mlp	False	0.05	2500000	4	True	IndivQLearningParticleDNN/14_1_4_none	none		0.05
IndivQLearningParticleDNN/15_1_5	slugs_centralized	shields/momentum_shield	True	-10	True	ParticleMomentum	True	False	10	-30	Individual_Deep_Q	1.0	simple_mlp	False	0.05	2500000	5	True	IndivQLearningParticleDNN/15_1_5_slugs_centralized	slugs_centralized	shields/momentum_shield	0.05
IndivQLearningParticleDNN/15_1_5	slugs_centralized	shields/momentum_shield	True	-10	True	ParticleMomentum	True	False	10	-30	Individual_Deep_Q	1.0	simple_mlp	False	0.05	2500000	5	True	IndivQLearningParticleDNN/15_1_5_slugs_decentralized	slugs_decentralized	shields/momentum_shield	0.05
IndivQLearningParticleDNN/15_1_5	slugs_centralized	shields/momentum_shield	True	-10	True	ParticleMomentum	True	False	10	-30	Individual_Deep_Q	1.0	simple_mlp	False	0.05	2500000	5	True	IndivQLearningParticleDNN/15_1_5_none	none		0.05
IndivQLearningParticleDNN/16_1_6	slugs_centralized	shields/momentum_shield	True	-10	True	ParticleMomentum	True	False	10	-30	Individual_Deep_Q	1.0	simple_mlp	False	0.05	2500000	6	True	IndivQLearningParticleDNN/16_1_6_slugs_centralized	slugs_centralized	shields/momentum_shield	0.05
IndivQLearningParticleDNN/16_1_6	slugs_centralized	shields/momentum_shield	True	-10	True	ParticleMomentum	True	False	10	-30	Individual_Deep_Q	1.0	simple_mlp	False	0.05	2500000	6	True	IndivQLearningParticleDNN/16_1_6_slugs_decentralized	slugs_decentralized	shields/momentum_shield	0.05
IndivQLearningParticleDNN/16_1_6	slugs_centralized	shields/momentum_shield	True	-10	True	ParticleMomentum	True	False	10	-30	Individual_Deep_Q	1.0	simple_mlp	False	0.05	2500000	6	True	IndivQLearningParticleDNN/16_1_6_none	none		0.05
IndivQLearningParticleDNN/17_1_7	slugs_centralized	shields/momentum_shield	True	-10	True	ParticleMomentum	True	False	10	-30	Individual_Deep_Q	1.0	simple_mlp	False	0.05	2500000	7	True	IndivQLearningParticleDNN/17_1_7_slugs_centralized	slugs_centralized	shields/momentum_shield	0.05
IndivQLearningParticleDNN/17_1_7	slugs_centralized	shields/momentum_shield	True	-10	True	ParticleMomentum	True	False	10	-30	Individual_Deep_Q	1.0	simple_mlp	False	0.05	2500000	7	True	IndivQLearningParticleDNN/17_1_7_slugs_decentralized	slugs_decentralized	shields/momentum_shield	0.05
IndivQLearningParticleDNN/17_1_7	slugs_centralized	shields/momentum_shield	True	-10	True	ParticleMomentum	True	False	10	-30	Individual_Deep_Q	1.0	simple_mlp	False	0.05	2500000	7	True	IndivQLearningParticleDNN/17_1_7_none	none		0.05
IndivQLearningParticleDNN/18_1_8	slugs_centralized	shields/momentum_shield	True	-10	True	ParticleMomentum	True	False	10	-30	Individual_Deep_Q	1.0	simple_mlp	False	0.05	2500000	8	True	IndivQLearningParticleDNN/18_1_8_slugs_centralized	slugs_centralized	shields/momentum_shield	0.05
IndivQLearningParticleDNN/18_1_8	slugs_centralized	shields/momentum_shield	True	-10	True	ParticleMomentum	True	False	10	-30	Individual_Deep_Q	1.0	simple_mlp	False	0.05	2500000	8	True	IndivQLearningParticleDNN/18_1_8_slugs_decentralized	slugs_decentralized	shields/momentum_shield	0.05
IndivQLearningParticleDNN/18_1_8	slugs_centralized	shields/momentum_shield	True	-10	True	ParticleMomentum	True	False	10	-30	Individual_Deep_Q	1.0	simple_mlp	False	0.05	2500000	8	True	IndivQLearningParticleDNN/18_1_8_none	none		0.05
IndivQLearningParticleDNN/19_1_9	slugs_centralized	shields/momentum_shield	True	-10	True	ParticleMomentum	True	False	10	-30	Individual_Deep_Q	1.0	simple_mlp	False	0.05	2500000	9	True	IndivQLearningParticleDNN/19_1_9_slugs_centralized	slugs_centralized	shields/momentum_shield	0.05
IndivQLearningParticleDNN/19_1_9	slugs_centralized	shields/momentum_shield	True	-10	True	ParticleMomentum	True	False	10	-30	Individual_Deep_Q	1.0	simple_mlp	False	0.05	2500000	9	True	IndivQLearningParticleDNN/19_1_9_slugs_decentralized	slugs_decentralized	shields/momentum_shield	0.05
IndivQLearningParticleDNN/19_1_9	slugs_centralized	shields/momentum_shield	True	-10	True	ParticleMomentum	True	False	10	-30	Individual_Deep_Q	1.0	simple_mlp	False	0.05	2500000	9	True	IndivQLearningParticleDNN/19_1_9_none	none		0.05
IndivQLearningParticleDNN/20_2_0	slugs_centralized	shields/momentum_shield	True	-10	True	ParticleMomentum	False	False	10	-30	Individual_Deep_Q	1.0	simple_mlp	True	0.05	2500000	0	True	IndivQLearningParticleDNN/20_2_0_slugs_centralized	slugs_centralized	shields/momentum_shield	0.05
IndivQLearningParticleDNN/20_2_0	slugs_centralized	shields/momentum_shield	True	-10	True	ParticleMomentum	False	False	10	-30	Individual_Deep_Q	1.0	simple_mlp	True	0.05	2500000	0	True	IndivQLearningParticleDNN/20_2_0_slugs_decentralized	slugs_decentralized	shields/momentum_shield	0.05
IndivQLearningParticleDNN/20_2_0	slugs_centralized	shields/momentum_shield	True	-10	True	ParticleMomentum	False	False	10	-30	Individual_Deep_Q	1.0	simple_mlp	True	0.05	2500000	0	True	IndivQLearningParticleDNN/20_2_0_none	none		0.05
IndivQLearningParticleDNN/21_2_1	slugs_centralized	shields/momentum_shield	True	-10	True	ParticleMomentum	False	False	10	-30	Individual_Deep_Q	1.0	simple_mlp	True	0.05	2500000	1	True	IndivQLearningParticleDNN/21_2_1_slugs_centralized	slugs_centralized	shields/momentum_shield	0.05
IndivQLearningParticleDNN/21_2_1	slugs_centralized	shields/momentum_shield	True	-10	True	ParticleMomentum	False	False	10	-30	Individual_Deep_Q	1.0	simple_mlp	True	0.05	2500000	1	True	IndivQLearningParticleDNN/21_2_1_slugs_decentralized	slugs_decentralized	shields/momentum_shield	0.05
IndivQLearningParticleDNN/21_2_1	slugs_centralized	shields/momentum_shield	True	-10	True	ParticleMomentum	False	False	10	-30	Individual_Deep_Q	1.0	simple_mlp	True	0.05	2500000	1	True	IndivQLearningParticleDNN/21_2_1_none	none		0.05
IndivQLearningParticleDNN/22_2_2	slugs_centralized	shields/momentum_shield	True	-10	True	ParticleMomentum	False	False	10	-30	Individual_Deep_Q	1.0	simple_mlp	True	0.05	2500000	2	True	IndivQLearningParticleDNN/22_2_2_slugs_centralized	slugs_centralized	shields/momentum_shield	0.05
IndivQLearningParticleDNN/22_2_2	slugs_centralized	shields/momentum_shield	True	-10	True	ParticleMomentum	False	False	10	-30	Individual_Deep_Q	1.0	simple_mlp	True	0.05	2500000	2	True	IndivQLearningParticleDNN/22_2_2_slugs_decentralized	slugs_decentralized	shields/momentum_shield	0.05
IndivQLearningParticleDNN/22_2_2	slugs_centralized	shields/momentum_shield	True	-10	True	ParticleMomentum	False	False	10	-30	Individual_Deep_Q	1.0	simple_mlp	True	0.05	2500000	2	True	IndivQLearningParticleDNN/22_2_2_none	none		0.05
IndivQLearningParticleDNN/23_2_3	slugs_centralized	shields/momentum_shield	True	-10	True	ParticleMomentum	False	False	10	-30	Individual_Deep_Q	1.0	simple_mlp	True	0.05	2500000	3	True	IndivQLearningParticleDNN/23_2_3_slugs_centralized	slugs_centralized	shields/momentum_shield	0.05
IndivQLearningParticleDNN/23_2_3	slugs_centralized	shields/momentum_shield	True	-10	True	ParticleMomentum	False	False	10	-30	Individual_Deep_Q	1.0	simple_mlp	True	0.05	2500000	3	True	IndivQLearningParticleDNN/23_2_3_slugs_decentralized	slugs_decentralized	shields/momentum_shield	0.05
IndivQLearningParticleDNN/23_2_3	slugs_centralized	shields/momentum_shield	True	-10	True	ParticleMomentum	False	False	10	-30	Individual_Deep_Q	1.0	simple_mlp	True	0.05	2500000	3	True	IndivQLearningParticleDNN/23_2_3_none	none		0.05
IndivQLearningParticleDNN/24_2_4	slugs_centralized	shields/momentum_shield	True	-10	True	ParticleMomentum	False	False	10	-30	Individual_Deep_Q	1.0	simple_mlp	True	0.05	2500000	4	True	IndivQLearningParticleDNN/24_2_4_slugs_centralized	slugs_centralized	shields/momentum_shield	0.05
IndivQLearningParticleDNN/24_2_4	slugs_centralized	shields/momentum_shield	True	-10	True	ParticleMomentum	False	False	10	-30	Individual_Deep_Q	1.0	simple_mlp	True	0.05	2500000	4	True	IndivQLearningParticleDNN/24_2_4_slugs_decentralized	slugs_decentralized	shields/momentum_shield	0.05
IndivQLearningParticleDNN/24_2_4	slugs_centralized	shields/momentum_shield	True	-10	True	ParticleMomentum	False	False	10	-30	Individual_Deep_Q	1.0	simple_mlp	True	0.05	2500000	4	True	IndivQLearningParticleDNN/24_2_4_none	none		0.05
IndivQLearningParticleDNN/25_2_5	slugs_centralized	shields/momentum_shield	True	-10	True	ParticleMomentum	False	False	10	-30	Individual_Deep_Q	1.0	simple_mlp	True	0.05	2500000	5	True	IndivQLearningParticleDNN/25_2_5_slugs_centralized	slugs_centralized	shields/momentum_shield	0.05
IndivQLearningParticleDNN/25_2_5	slugs_centralized	shields/momentum_shield	True	-10	True	ParticleMomentum	False	False	10	-30	Individual_Deep_Q	1.0	simple_mlp	True	0.05	2500000	5	True	IndivQLearningParticleDNN/25_2_5_slugs_decentralized	slugs_decentralized	shields/momentum_shield	0.05
IndivQLearningParticleDNN/25_2_5	slugs_centralized	shields/momentum_shield	True	-10	True	ParticleMomentum	False	False	10	-30	Individual_Deep_Q	1.0	simple_mlp	True	0.05	2500000	5	True	IndivQLearningParticleDNN/25_2_5_none	none		0.05
IndivQLearningParticleDNN/26_2_6	slugs_centralized	shields/momentum_shield	True	-10	True	ParticleMomentum	False	False	10	-30	Individual_Deep_Q	1.0	simple_mlp	True	0.05	2500000	6	True	IndivQLearningParticleDNN/26_2_6_slugs_centralized	slugs_centralized	shields/momentum_shield	0.05
IndivQLearningParticleDNN/26_2_6	slugs_centralized	shields/momentum_shield	True	-10	True	ParticleMomentum	False	False	10	-30	Individual_Deep_Q	1.0	simple_mlp	True	0.05	2500000	6	True	IndivQLearningParticleDNN/26_2_6_slugs_decentralized	slugs_decentralized	shields/momentum_shield	0.05
IndivQLearningParticleDNN/26_2_6	slugs_centralized	shields/momentum_shield	True	-10	True	ParticleMomentum	False	False	10	-30	Individual_Deep_Q	1.0	simple_mlp	True	0.05	2500000	6	True	IndivQLearningParticleDNN/26_2_6_none	none		0.05
IndivQLearningParticleDNN/27_2_7	slugs_centralized	shields/momentum_shield	True	-10	True	ParticleMomentum	False	False	10	-30	Individual_Deep_Q	1.0	simple_mlp	True	0.05	2500000	7	True	IndivQLearningParticleDNN/27_2_7_slugs_centralized	slugs_centralized	shields/momentum_shield	0.05
IndivQLearningParticleDNN/27_2_7	slugs_centralized	shields/momentum_shield	True	-10	True	ParticleMomentum	False	False	10	-30	Individual_Deep_Q	1.0	simple_mlp	True	0.05	2500000	7	True	IndivQLearningParticleDNN/27_2_7_slugs_decentralized	slugs_decentralized	shields/momentum_shield	0.05
IndivQLearningParticleDNN/27_2_7	slugs_centralized	shields/momentum_shield	True	-10	True	ParticleMomentum	False	False	10	-30	Individual_Deep_Q	1.0	simple_mlp	True	0.05	2500000	7	True	IndivQLearningParticleDNN/27_2_7_none	none		0.05
IndivQLearningParticleDNN/28_2_8	slugs_centralized	shields/momentum_shield	True	-10	True	ParticleMomentum	False	False	10	-30	Individual_Deep_Q	1.0	simple_mlp	True	0.05	2500000	8	True	IndivQLearningParticleDNN/28_2_8_slugs_centralized	slugs_centralized	shields/momentum_shield	0.05
IndivQLearningParticleDNN/28_2_8	slugs_centralized	shields/momentum_shield	True	-10	True	ParticleMomentum	False	False	10	-30	Individual_Deep_Q	1.0	simple_mlp	True	0.05	2500000	8	True	IndivQLearningParticleDNN/28_2_8_slugs_decentralized	slugs_decentralized	shields/momentum_shield	0.05
IndivQLearningParticleDNN/28_2_8	slugs_centralized	shields/momentum_shield	True	-10	True	ParticleMomentum	False	False	10	-30	Individual_Deep_Q	1.0	simple_mlp	True	0.05	2500000	8	True	IndivQLearningParticleDNN/28_2_8_none	none		0.05
IndivQLearningParticleDNN/29_2_9	slugs_centralized	shields/momentum_shield	True	-10	True	ParticleMomentum	False	False	10	-30	Individual_Deep_Q	1.0	simple_mlp	True	0.05	2500000	9	True	IndivQLearningParticleDNN/29_2_9_slugs_centralized	slugs_centralized	shields/momentum_shield	0.05
IndivQLearningParticleDNN/29_2_9	slugs_centralized	shields/momentum_shield	True	-10	True	ParticleMomentum	False	False	10	-30	Individual_Deep_Q	1.0	simple_mlp	True	0.05	2500000	9	True	IndivQLearningParticleDNN/29_2_9_slugs_decentralized	slugs_decentralized	shields/momentum_shield	0.05
IndivQLearningParticleDNN/29_2_9	slugs_centralized	shields/momentum_shield	True	-10	True	ParticleMomentum	False	False	10	-30	Individual_Deep_Q	1.0	simple_mlp	True	0.05	2500000	9	True	IndivQLearningParticleDNN/29_2_9_none	none		0.05
IndivQLearningParticleDNN/30_3_0	slugs_centralized	shields/momentum_shield	True	-10	True	ParticleMomentum	False	False	10	-30	Individual_Deep_Q	1.0	simple_mlp	False	0.05	2500000	0	True	IndivQLearningParticleDNN/30_3_0_slugs_centralized	slugs_centralized	shields/momentum_shield	0.05
IndivQLearningParticleDNN/30_3_0	slugs_centralized	shields/momentum_shield	True	-10	True	ParticleMomentum	False	False	10	-30	Individual_Deep_Q	1.0	simple_mlp	False	0.05	2500000	0	True	IndivQLearningParticleDNN/30_3_0_slugs_decentralized	slugs_decentralized	shields/momentum_shield	0.05
IndivQLearningParticleDNN/30_3_0	slugs_centralized	shields/momentum_shield	True	-10	True	ParticleMomentum	False	False	10	-30	Individual_Deep_Q	1.0	simple_mlp	False	0.05	2500000	0	True	IndivQLearningParticleDNN/30_3_0_none	none		0.05
IndivQLearningParticleDNN/31_3_1	slugs_centralized	shields/momentum_shield	True	-10	True	ParticleMomentum	False	False	10	-30	Individual_Deep_Q	1.0	simple_mlp	False	0.05	2500000	1	True	IndivQLearningParticleDNN/31_3_1_slugs_centralized	slugs_centralized	shields/momentum_shield	0.05
IndivQLearningParticleDNN/31_3_1	slugs_centralized	shields/momentum_shield	True	-10	True	ParticleMomentum	False	False	10	-30	Individual_Deep_Q	1.0	simple_mlp	False	0.05	2500000	1	True	IndivQLearningParticleDNN/31_3_1_slugs_decentralized	slugs_decentralized	shields/momentum_shield	0.05
IndivQLearningParticleDNN/31_3_1	slugs_centralized	shields/momentum_shield	True	-10	True	ParticleMomentum	False	False	10	-30	Individual_Deep_Q	1.0	simple_mlp	False	0.05	2500000	1	True	IndivQLearningParticleDNN/31_3_1_none	none		0.05
IndivQLearningParticleDNN/32_3_2	slugs_centralized	shields/momentum_shield	True	-10	True	ParticleMomentum	False	False	10	-30	Individual_Deep_Q	1.0	simple_mlp	False	0.05	2500000	2	True	IndivQLearningParticleDNN/32_3_2_slugs_centralized	slugs_centralized	shields/momentum_shield	0.05
IndivQLearningParticleDNN/32_3_2	slugs_centralized	shields/momentum_shield	True	-10	True	ParticleMomentum	False	False	10	-30	Individual_Deep_Q	1.0	simple_mlp	False	0.05	2500000	2	True	IndivQLearningParticleDNN/32_3_2_slugs_decentralized	slugs_decentralized	shields/momentum_shield	0.05
IndivQLearningParticleDNN/32_3_2	slugs_centralized	shields/momentum_shield	True	-10	True	ParticleMomentum	False	False	10	-30	Individual_Deep_Q	1.0	simple_mlp	False	0.05	2500000	2	True	IndivQLearningParticleDNN/32_3_2_none	none		0.05
IndivQLearningParticleDNN/33_3_3	slugs_centralized	shields/momentum_shield	True	-10	True	ParticleMomentum	False	False	10	-30	Individual_Deep_Q	1.0	simple_mlp	False	0.05	2500000	3	True	IndivQLearningParticleDNN/33_3_3_slugs_centralized	slugs_centralized	shields/momentum_shield	0.05
IndivQLearningParticleDNN/33_3_3	slugs_centralized	shields/momentum_shield	True	-10	True	ParticleMomentum	False	False	10	-30	Individual_Deep_Q	1.0	simple_mlp	False	0.05	2500000	3	True	IndivQLearningParticleDNN/33_3_3_slugs_decentralized	slugs_decentralized	shields/momentum_shield	0.05
IndivQLearningParticleDNN/33_3_3	slugs_centralized	shields/momentum_shield	True	-10	True	ParticleMomentum	False	False	10	-30	Individual_Deep_Q	1.0	simple_mlp	False	0.05	2500000	3	True	IndivQLearningParticleDNN/33_3_3_none	none		0.05
IndivQLearningParticleDNN/34_3_4	slugs_centralized	shields/momentum_shield	True	-10	True	ParticleMomentum	False	False	10	-30	Individual_Deep_Q	1.0	simple_mlp	False	0.05	2500000	4	True	IndivQLearningParticleDNN/34_3_4_slugs_centralized	slugs_centralized	shields/momentum_shield	0.05
IndivQLearningParticleDNN/34_3_4	slugs_centralized	shields/momentum_shield	True	-10	True	ParticleMomentum	False	False	10	-30	Individual_Deep_Q	1.0	simple_mlp	False	0.05	2500000	4	True	IndivQLearningParticleDNN/34_3_4_slugs_decentralized	slugs_decentralized	shields/momentum_shield	0.05
IndivQLearningParticleDNN/34_3_4	slugs_centralized	shields/momentum_shield	True	-10	True	ParticleMomentum	False	False	10	-30	Individual_Deep_Q	1.0	simple_mlp	False	0.05	2500000	4	True	IndivQLearningParticleDNN/34_3_4_none	none		0.05
IndivQLearningParticleDNN/35_3_5	slugs_centralized	shields/momentum_shield	True	-10	True	ParticleMomentum	False	False	10	-30	Individual_Deep_Q	1.0	simple_mlp	False	0.05	2500000	5	True	IndivQLearningParticleDNN/35_3_5_slugs_centralized	slugs_centralized	shields/momentum_shield	0.05
IndivQLearningParticleDNN/35_3_5	slugs_centralized	shields/momentum_shield	True	-10	True	ParticleMomentum	False	False	10	-30	Individual_Deep_Q	1.0	simple_mlp	False	0.05	2500000	5	True	IndivQLearningParticleDNN/35_3_5_slugs_decentralized	slugs_decentralized	shields/momentum_shield	0.05
IndivQLearningParticleDNN/35_3_5	slugs_centralized	shields/momentum_shield	True	-10	True	ParticleMomentum	False	False	10	-30	Individual_Deep_Q	1.0	simple_mlp	False	0.05	2500000	5	True	IndivQLearningParticleDNN/35_3_5_none	none		0.05
IndivQLearningParticleDNN/36_3_6	slugs_centralized	shields/momentum_shield	True	-10	True	ParticleMomentum	False	False	10	-30	Individual_Deep_Q	1.0	simple_mlp	False	0.05	2500000	6	True	IndivQLearningParticleDNN/36_3_6_slugs_centralized	slugs_centralized	shields/momentum_shield	0.05
IndivQLearningParticleDNN/36_3_6	slugs_centralized	shields/momentum_shield	True	-10	True	ParticleMomentum	False	False	10	-30	Individual_Deep_Q	1.0	simple_mlp	False	0.05	2500000	6	True	IndivQLearningParticleDNN/36_3_6_slugs_decentralized	slugs_decentralized	shields/momentum_shield	0.05
IndivQLearningParticleDNN/36_3_6	slugs_centralized	shields/momentum_shield	True	-10	True	ParticleMomentum	False	False	10	-30	Individual_Deep_Q	1.0	simple_mlp	False	0.05	2500000	6	True	IndivQLearningParticleDNN/36_3_6_none	none		0.05
IndivQLearningParticleDNN/37_3_7	slugs_centralized	shields/momentum_shield	True	-10	True	ParticleMomentum	False	False	10	-30	Individual_Deep_Q	1.0	simple_mlp	False	0.05	2500000	7	True	IndivQLearningParticleDNN/37_3_7_slugs_centralized	slugs_centralized	shields/momentum_shield	0.05
IndivQLearningParticleDNN/37_3_7	slugs_centralized	shields/momentum_shield	True	-10	True	ParticleMomentum	False	False	10	-30	Individual_Deep_Q	1.0	simple_mlp	False	0.05	2500000	7	True	IndivQLearningParticleDNN/37_3_7_slugs_decentralized	slugs_decentralized	shields/momentum_shield	0.05
IndivQLearningParticleDNN/37_3_7	slugs_centralized	shields/momentum_shield	True	-10	True	ParticleMomentum	False	False	10	-30	Individual_Deep_Q	1.0	simple_mlp	False	0.05	2500000	7	True	IndivQLearningParticleDNN/37_3_7_none	none		0.05
IndivQLearningParticleDNN/38_3_8	slugs_centralized	shields/momentum_shield	True	-10	True	ParticleMomentum	False	False	10	-30	Individual_Deep_Q	1.0	simple_mlp	False	0.05	2500000	8	True	IndivQLearningParticleDNN/38_3_8_slugs_centralized	slugs_centralized	shields/momentum_shield	0.05
IndivQLearningParticleDNN/38_3_8	slugs_centralized	shields/momentum_shield	True	-10	True	ParticleMomentum	False	False	10	-30	Individual_Deep_Q	1.0	simple_mlp	False	0.05	2500000	8	True	IndivQLearningParticleDNN/38_3_8_slugs_decentralized	slugs_decentralized	shields/momentum_shield	0.05
IndivQLearningParticleDNN/38_3_8	slugs_centralized	shields/momentum_shield	True	-10	True	ParticleMomentum	False	False	10	-30	Individual_Deep_Q	1.0	simple_mlp	False	0.05	2500000	8	True	IndivQLearningParticleDNN/38_3_8_none	none		0.05
IndivQLearningParticleDNN/39_3_9	slugs_centralized	shields/momentum_shield	True	-10	True	ParticleMomentum	False	False	10	-30	Individual_Deep_Q	1.0	simple_mlp	False	0.05	2500000	9	True	IndivQLearningParticleDNN/39_3_9_slugs_centralized	slugs_centralized	shields/momentum_shield	0.05
IndivQLearningParticleDNN/39_3_9	slugs_centralized	shields/momentum_shield	True	-10	True	ParticleMomentum	False	False	10	-30	Individual_Deep_Q	1.0	simple_mlp	False	0.05	2500000	9	True	IndivQLearningParticleDNN/39_3_9_slugs_decentralized	slugs_decentralized	shields/momentum_shield	0.05
IndivQLearningParticleDNN/39_3_9	slugs_centralized	shields/momentum_shield	True	-10	True	ParticleMomentum	False	False	10	-30	Individual_Deep_Q	1.0	simple_mlp	False	0.05	2500000	9	True	IndivQLearningParticleDNN/39_3_9_none	none		0.05
IndivQLearningParticleDNN/40_4_0	slugs_decentralized	shields/momentum_shield	True	-10	True	ParticleMomentum	True	False	10	-30	Individual_Deep_Q	1.0	simple_mlp	True	0.05	2500000	0	True	IndivQLearningParticleDNN/40_4_0_slugs_centralized	slugs_centralized	shields/momentum_shield	0.05
IndivQLearningParticleDNN/40_4_0	slugs_decentralized	shields/momentum_shield	True	-10	True	ParticleMomentum	True	False	10	-30	Individual_Deep_Q	1.0	simple_mlp	True	0.05	2500000	0	True	IndivQLearningParticleDNN/40_4_0_slugs_decentralized	slugs_decentralized	shields/momentum_shield	0.05
IndivQLearningParticleDNN/40_4_0	slugs_decentralized	shields/momentum_shield	True	-10	True	ParticleMomentum	True	False	10	-30	Individual_Deep_Q	1.0	simple_mlp	True	0.05	2500000	0	True	IndivQLearningParticleDNN/40_4_0_none	none		0.05
IndivQLearningParticleDNN/41_4_1	slugs_decentralized	shields/momentum_shield	True	-10	True	ParticleMomentum	True	False	10	-30	Individual_Deep_Q	1.0	simple_mlp	True	0.05	2500000	1	True	IndivQLearningParticleDNN/41_4_1_slugs_centralized	slugs_centralized	shields/momentum_shield	0.05
IndivQLearningParticleDNN/41_4_1	slugs_decentralized	shields/momentum_shield	True	-10	True	ParticleMomentum	True	False	10	-30	Individual_Deep_Q	1.0	simple_mlp	True	0.05	2500000	1	True	IndivQLearningParticleDNN/41_4_1_slugs_decentralized	slugs_decentralized	shields/momentum_shield	0.05
IndivQLearningParticleDNN/41_4_1	slugs_decentralized	shields/momentum_shield	True	-10	True	ParticleMomentum	True	False	10	-30	Individual_Deep_Q	1.0	simple_mlp	True	0.05	2500000	1	True	IndivQLearningParticleDNN/41_4_1_none	none		0.05
IndivQLearningParticleDNN/42_4_2	slugs_decentralized	shields/momentum_shield	True	-10	True	ParticleMomentum	True	False	10	-30	Individual_Deep_Q	1.0	simple_mlp	True	0.05	2500000	2	True	IndivQLearningParticleDNN/42_4_2_slugs_centralized	slugs_centralized	shields/momentum_shield	0.05
IndivQLearningParticleDNN/42_4_2	slugs_decentralized	shields/momentum_shield	True	-10	True	ParticleMomentum	True	False	10	-30	Individual_Deep_Q	1.0	simple_mlp	True	0.05	2500000	2	True	IndivQLearningParticleDNN/42_4_2_slugs_decentralized	slugs_decentralized	shields/momentum_shield	0.05
IndivQLearningParticleDNN/42_4_2	slugs_decentralized	shields/momentum_shield	True	-10	True	ParticleMomentum	True	False	10	-30	Individual_Deep_Q	1.0	simple_mlp	True	0.05	2500000	2	True	IndivQLearningParticleDNN/42_4_2_none	none		0.05
IndivQLearningParticleDNN/43_4_3	slugs_decentralized	shields/momentum_shield	True	-10	True	ParticleMomentum	True	False	10	-30	Individual_Deep_Q	1.0	simple_mlp	True	0.05	2500000	3	True	IndivQLearningParticleDNN/43_4_3_slugs_centralized	slugs_centralized	shields/momentum_shield	0.05
IndivQLearningParticleDNN/43_4_3	slugs_decentralized	shields/momentum_shield	True	-10	True	ParticleMomentum	True	False	10	-30	Individual_Deep_Q	1.0	simple_mlp	True	0.05	2500000	3	True	IndivQLearningParticleDNN/43_4_3_slugs_decentralized	slugs_decentralized	shields/momentum_shield	0.05
IndivQLearningParticleDNN/43_4_3	slugs_decentralized	shields/momentum_shield	True	-10	True	ParticleMomentum	True	False	10	-30	Individual_Deep_Q	1.0	simple_mlp	True	0.05	2500000	3	True	IndivQLearningParticleDNN/43_4_3_none	none		0.05
IndivQLearningParticleDNN/44_4_4	slugs_decentralized	shields/momentum_shield	True	-10	True	ParticleMomentum	True	False	10	-30	Individual_Deep_Q	1.0	simple_mlp	True	0.05	2500000	4	True	IndivQLearningParticleDNN/44_4_4_slugs_centralized	slugs_centralized	shields/momentum_shield	0.05
IndivQLearningParticleDNN/44_4_4	slugs_decentralized	shields/momentum_shield	True	-10	True	ParticleMomentum	True	False	10	-30	Individual_Deep_Q	1.0	simple_mlp	True	0.05	2500000	4	True	IndivQLearningParticleDNN/44_4_4_slugs_decentralized	slugs_decentralized	shields/momentum_shield	0.05
IndivQLearningParticleDNN/44_4_4	slugs_decentralized	shields/momentum_shield	True	-10	True	ParticleMomentum	True	False	10	-30	Individual_Deep_Q	1.0	simple_mlp	True	0.05	2500000	4	True	IndivQLearningParticleDNN/44_4_4_none	none		0.05
IndivQLearningParticleDNN/45_4_5	slugs_decentralized	shields/momentum_shield	True	-10	True	ParticleMomentum	True	False	10	-30	Individual_Deep_Q	1.0	simple_mlp	True	0.05	2500000	5	True	IndivQLearningParticleDNN/45_4_5_slugs_centralized	slugs_centralized	shields/momentum_shield	0.05
IndivQLearningParticleDNN/45_4_5	slugs_decentralized	shields/momentum_shield	True	-10	True	ParticleMomentum	True	False	10	-30	Individual_Deep_Q	1.0	simple_mlp	True	0.05	2500000	5	True	IndivQLearningParticleDNN/45_4_5_slugs_decentralized	slugs_decentralized	shields/momentum_shield	0.05
IndivQLearningParticleDNN/45_4_5	slugs_decentralized	shields/momentum_shield	True	-10	True	ParticleMomentum	True	False	10	-30	Individual_Deep_Q	1.0	simple_mlp	True	0.05	2500000	5	True	IndivQLearningParticleDNN/45_4_5_none	none		0.05
IndivQLearningParticleDNN/46_4_6	slugs_decentralized	shields/momentum_shield	True	-10	True	ParticleMomentum	True	False	10	-30	Individual_Deep_Q	1.0	simple_mlp	True	0.05	2500000	6	True	IndivQLearningParticleDNN/46_4_6_slugs_centralized	slugs_centralized	shields/momentum_shield	0.05
IndivQLearningParticleDNN/46_4_6	slugs_decentralized	shields/momentum_shield	True	-10	True	ParticleMomentum	True	False	10	-30	Individual_Deep_Q	1.0	simple_mlp	True	0.05	2500000	6	True	IndivQLearningParticleDNN/46_4_6_slugs_decentralized	slugs_decentralized	shields/momentum_shield	0.05
IndivQLearningParticleDNN/46_4_6	slugs_decentralized	shields/momentum_shield	True	-10	True	ParticleMomentum	True	False	10	-30	Individual_Deep_Q	1.0	simple_mlp	True	0.05	2500000	6	True	IndivQLearningParticleDNN/46_4_6_none	none		0.05
IndivQLearningParticleDNN/47_4_7	slugs_decentralized	shields/momentum_shield	True	-10	True	ParticleMomentum	True	False	10	-30	Individual_Deep_Q	1.0	simple_mlp	True	0.05	2500000	7	True	IndivQLearningParticleDNN/47_4_7_slugs_centralized	slugs_centralized	shields/momentum_shield	0.05
IndivQLearningParticleDNN/47_4_7	slugs_decentralized	shields/momentum_shield	True	-10	True	ParticleMomentum	True	False	10	-30	Individual_Deep_Q	1.0	simple_mlp	True	0.05	2500000	7	True	IndivQLearningParticleDNN/47_4_7_slugs_decentralized	slugs_decentralized	shields/momentum_shield	0.05
IndivQLearningParticleDNN/47_4_7	slugs_decentralized	shields/momentum_shield	True	-10	True	ParticleMomentum	True	False	10	-30	Individual_Deep_Q	1.0	simple_mlp	True	0.05	2500000	7	True	IndivQLearningParticleDNN/47_4_7_none	none		0.05
IndivQLearningParticleDNN/48_4_8	slugs_decentralized	shields/momentum_shield	True	-10	True	ParticleMomentum	True	False	10	-30	Individual_Deep_Q	1.0	simple_mlp	True	0.05	2500000	8	True	IndivQLearningParticleDNN/48_4_8_slugs_centralized	slugs_centralized	shields/momentum_shield	0.05
IndivQLearningParticleDNN/48_4_8	slugs_decentralized	shields/momentum_shield	True	-10	True	ParticleMomentum	True	False	10	-30	Individual_Deep_Q	1.0	simple_mlp	True	0.05	2500000	8	True	IndivQLearningParticleDNN/48_4_8_slugs_decentralized	slugs_decentralized	shields/momentum_shield	0.05
IndivQLearningParticleDNN/48_4_8	slugs_decentralized	shields/momentum_shield	True	-10	True	ParticleMomentum	True	False	10	-30	Individual_Deep_Q	1.0	simple_mlp	True	0.05	2500000	8	True	IndivQLearningParticleDNN/48_4_8_none	none		0.05
IndivQLearningParticleDNN/49_4_9	slugs_decentralized	shields/momentum_shield	True	-10	True	ParticleMomentum	True	False	10	-30	Individual_Deep_Q	1.0	simple_mlp	True	0.05	2500000	9	True	IndivQLearningParticleDNN/49_4_9_slugs_centralized	slugs_centralized	shields/momentum_shield	0.05
IndivQLearningParticleDNN/49_4_9	slugs_decentralized	shields/momentum_shield	True	-10	True	ParticleMomentum	True	False	10	-30	Individual_Deep_Q	1.0	simple_mlp	True	0.05	2500000	9	True	IndivQLearningParticleDNN/49_4_9_slugs_decentralized	slugs_decentralized	shields/momentum_shield	0.05
IndivQLearningParticleDNN/49_4_9	slugs_decentralized	shields/momentum_shield	True	-10	True	ParticleMomentum	True	False	10	-30	Individual_Deep_Q	1.0	simple_mlp	True	0.05	2500000	9	True	IndivQLearningParticleDNN/49_4_9_none	none		0.05
IndivQLearningParticleDNN/50_5_0	slugs_decentralized	shields/momentum_shield	True	-10	True	ParticleMomentum	True	False	10	-30	Individual_Deep_Q	1.0	simple_mlp	False	0.05	2500000	0	True	IndivQLearningParticleDNN/50_5_0_slugs_centralized	slugs_centralized	shields/momentum_shield	0.05
IndivQLearningParticleDNN/50_5_0	slugs_decentralized	shields/momentum_shield	True	-10	True	ParticleMomentum	True	False	10	-30	Individual_Deep_Q	1.0	simple_mlp	False	0.05	2500000	0	True	IndivQLearningParticleDNN/50_5_0_slugs_decentralized	slugs_decentralized	shields/momentum_shield	0.05
IndivQLearningParticleDNN/50_5_0	slugs_decentralized	shields/momentum_shield	True	-10	True	ParticleMomentum	True	False	10	-30	Individual_Deep_Q	1.0	simple_mlp	False	0.05	2500000	0	True	IndivQLearningParticleDNN/50_5_0_none	none		0.05
IndivQLearningParticleDNN/51_5_1	slugs_decentralized	shields/momentum_shield	True	-10	True	ParticleMomentum	True	False	10	-30	Individual_Deep_Q	1.0	simple_mlp	False	0.05	2500000	1	True	IndivQLearningParticleDNN/51_5_1_slugs_centralized	slugs_centralized	shields/momentum_shield	0.05
IndivQLearningParticleDNN/51_5_1	slugs_decentralized	shields/momentum_shield	True	-10	True	ParticleMomentum	True	False	10	-30	Individual_Deep_Q	1.0	simple_mlp	False	0.05	2500000	1	True	IndivQLearningParticleDNN/51_5_1_slugs_decentralized	slugs_decentralized	shields/momentum_shield	0.05
IndivQLearningParticleDNN/51_5_1	slugs_decentralized	shields/momentum_shield	True	-10	True	ParticleMomentum	True	False	10	-30	Individual_Deep_Q	1.0	simple_mlp	False	0.05	2500000	1	True	IndivQLearningParticleDNN/51_5_1_none	none		0.05
IndivQLearningParticleDNN/52_5_2	slugs_decentralized	shields/momentum_shield	True	-10	True	ParticleMomentum	True	False	10	-30	Individual_Deep_Q	1.0	simple_mlp	False	0.05	2500000	2	True	IndivQLearningParticleDNN/52_5_2_slugs_centralized	slugs_centralized	shields/momentum_shield	0.05
IndivQLearningParticleDNN/52_5_2	slugs_decentralized	shields/momentum_shield	True	-10	True	ParticleMomentum	True	False	10	-30	Individual_Deep_Q	1.0	simple_mlp	False	0.05	2500000	2	True	IndivQLearningParticleDNN/52_5_2_slugs_decentralized	slugs_decentralized	shields/momentum_shield	0.05
IndivQLearningParticleDNN/52_5_2	slugs_decentralized	shields/momentum_shield	True	-10	True	ParticleMomentum	True	False	10	-30	Individual_Deep_Q	1.0	simple_mlp	False	0.05	2500000	2	True	IndivQLearningParticleDNN/52_5_2_none	none		0.05
IndivQLearningParticleDNN/53_5_3	slugs_decentralized	shields/momentum_shield	True	-10	True	ParticleMomentum	True	False	10	-30	Individual_Deep_Q	1.0	simple_mlp	False	0.05	2500000	3	True	IndivQLearningParticleDNN/53_5_3_slugs_centralized	slugs_centralized	shields/momentum_shield	0.05
IndivQLearningParticleDNN/53_5_3	slugs_decentralized	shields/momentum_shield	True	-10	True	ParticleMomentum	True	False	10	-30	Individual_Deep_Q	1.0	simple_mlp	False	0.05	2500000	3	True	IndivQLearningParticleDNN/53_5_3_slugs_decentralized	slugs_decentralized	shields/momentum_shield	0.05
IndivQLearningParticleDNN/53_5_3	slugs_decentralized	shields/momentum_shield	True	-10	True	ParticleMomentum	True	False	10	-30	Individual_Deep_Q	1.0	simple_mlp	False	0.05	2500000	3	True	IndivQLearningParticleDNN/53_5_3_none	none		0.05
IndivQLearningParticleDNN/54_5_4	slugs_decentralized	shields/momentum_shield	True	-10	True	ParticleMomentum	True	False	10	-30	Individual_Deep_Q	1.0	simple_mlp	False	0.05	2500000	4	True	IndivQLearningParticleDNN/54_5_4_slugs_centralized	slugs_centralized	shields/momentum_shield	0.05
IndivQLearningParticleDNN/54_5_4	slugs_decentralized	shields/momentum_shield	True	-10	True	ParticleMomentum	True	False	10	-30	Individual_Deep_Q	1.0	simple_mlp	False	0.05	2500000	4	True	IndivQLearningParticleDNN/54_5_4_slugs_decentralized	slugs_decentralized	shields/momentum_shield	0.05
IndivQLearningParticleDNN/54_5_4	slugs_decentralized	shields/momentum_shield	True	-10	True	ParticleMomentum	True	False	10	-30	Individual_Deep_Q	1.0	simple_mlp	False	0.05	2500000	4	True	IndivQLearningParticleDNN/54_5_4_none	none		0.05
IndivQLearningParticleDNN/55_5_5	slugs_decentralized	shields/momentum_shield	True	-10	True	ParticleMomentum	True	False	10	-30	Individual_Deep_Q	1.0	simple_mlp	False	0.05	2500000	5	True	IndivQLearningParticleDNN/55_5_5_slugs_centralized	slugs_centralized	shields/momentum_shield	0.05
IndivQLearningParticleDNN/55_5_5	slugs_decentralized	shields/momentum_shield	True	-10	True	ParticleMomentum	True	False	10	-30	Individual_Deep_Q	1.0	simple_mlp	False	0.05	2500000	5	True	IndivQLearningParticleDNN/55_5_5_slugs_decentralized	slugs_decentralized	shields/momentum_shield	0.05
IndivQLearningParticleDNN/55_5_5	slugs_decentralized	shields/momentum_shield	True	-10	True	ParticleMomentum	True	False	10	-30	Individual_Deep_Q	1.0	simple_mlp	False	0.05	2500000	5	True	IndivQLearningParticleDNN/55_5_5_none	none		0.05
IndivQLearningParticleDNN/56_5_6	slugs_decentralized	shields/momentum_shield	True	-10	True	ParticleMomentum	True	False	10	-30	Individual_Deep_Q	1.0	simple_mlp	False	0.05	2500000	6	True	IndivQLearningParticleDNN/56_5_6_slugs_centralized	slugs_centralized	shields/momentum_shield	0.05
IndivQLearningParticleDNN/56_5_6	slugs_decentralized	shields/momentum_shield	True	-10	True	ParticleMomentum	True	False	10	-30	Individual_Deep_Q	1.0	simple_mlp	False	0.05	2500000	6	True	IndivQLearningParticleDNN/56_5_6_slugs_decentralized	slugs_decentralized	shields/momentum_shield	0.05
IndivQLearningParticleDNN/56_5_6	slugs_decentralized	shields/momentum_shield	True	-10	True	ParticleMomentum	True	False	10	-30	Individual_Deep_Q	1.0	simple_mlp	False	0.05	2500000	6	True	IndivQLearningParticleDNN/56_5_6_none	none		0.05
IndivQLearningParticleDNN/57_5_7	slugs_decentralized	shields/momentum_shield	True	-10	True	ParticleMomentum	True	False	10	-30	Individual_Deep_Q	1.0	simple_mlp	False	0.05	2500000	7	True	IndivQLearningParticleDNN/57_5_7_slugs_centralized	slugs_centralized	shields/momentum_shield	0.05
IndivQLearningParticleDNN/57_5_7	slugs_decentralized	shields/momentum_shield	True	-10	True	ParticleMomentum	True	False	10	-30	Individual_Deep_Q	1.0	simple_mlp	False	0.05	2500000	7	True	IndivQLearningParticleDNN/57_5_7_slugs_decentralized	slugs_decentralized	shields/momentum_shield	0.05
IndivQLearningParticleDNN/57_5_7	slugs_decentralized	shields/momentum_shield	True	-10	True	ParticleMomentum	True	False	10	-30	Individual_Deep_Q	1.0	simple_mlp	False	0.05	2500000	7	True	IndivQLearningParticleDNN/57_5_7_none	none		0.05
IndivQLearningParticleDNN/58_5_8	slugs_decentralized	shields/momentum_shield	True	-10	True	ParticleMomentum	True	False	10	-30	Individual_Deep_Q	1.0	simple_mlp	False	0.05	2500000	8	True	IndivQLearningParticleDNN/58_5_8_slugs_centralized	slugs_centralized	shields/momentum_shield	0.05
IndivQLearningParticleDNN/58_5_8	slugs_decentralized	shields/momentum_shield	True	-10	True	ParticleMomentum	True	False	10	-30	Individual_Deep_Q	1.0	simple_mlp	False	0.05	2500000	8	True	IndivQLearningParticleDNN/58_5_8_slugs_decentralized	slugs_decentralized	shields/momentum_shield	0.05
IndivQLearningParticleDNN/58_5_8	slugs_decentralized	shields/momentum_shield	True	-10	True	ParticleMomentum	True	False	10	-30	Individual_Deep_Q	1.0	simple_mlp	False	0.05	2500000	8	True	IndivQLearningParticleDNN/58_5_8_none	none		0.05
IndivQLearningParticleDNN/59_5_9	slugs_decentralized	shields/momentum_shield	True	-10	True	ParticleMomentum	True	False	10	-30	Individual_Deep_Q	1.0	simple_mlp	False	0.05	2500000	9	True	IndivQLearningParticleDNN/59_5_9_slugs_centralized	slugs_centralized	shields/momentum_shield	0.05
IndivQLearningParticleDNN/59_5_9	slugs_decentralized	shields/momentum_shield	True	-10	True	ParticleMomentum	True	False	10	-30	Individual_Deep_Q	1.0	simple_mlp	False	0.05	2500000	9	True	IndivQLearningParticleDNN/59_5_9_slugs_decentralized	slugs_decentralized	shields/momentum_shield	0.05
IndivQLearningParticleDNN/59_5_9	slugs_decentralized	shields/momentum_shield	True	-10	True	ParticleMomentum	True	False	10	-30	Individual_Deep_Q	1.0	simple_mlp	False	0.05	2500000	9	True	IndivQLearningParticleDNN/59_5_9_none	none		0.05
IndivQLearningParticleDNN/60_6_0	slugs_decentralized	shields/momentum_shield	True	-10	True	ParticleMomentum	False	False	10	-30	Individual_Deep_Q	1.0	simple_mlp	True	0.05	2500000	0	True	IndivQLearningParticleDNN/60_6_0_slugs_centralized	slugs_centralized	shields/momentum_shield	0.05
IndivQLearningParticleDNN/60_6_0	slugs_decentralized	shields/momentum_shield	True	-10	True	ParticleMomentum	False	False	10	-30	Individual_Deep_Q	1.0	simple_mlp	True	0.05	2500000	0	True	IndivQLearningParticleDNN/60_6_0_slugs_decentralized	slugs_decentralized	shields/momentum_shield	0.05
IndivQLearningParticleDNN/60_6_0	slugs_decentralized	shields/momentum_shield	True	-10	True	ParticleMomentum	False	False	10	-30	Individual_Deep_Q	1.0	simple_mlp	True	0.05	2500000	0	True	IndivQLearningParticleDNN/60_6_0_none	none		0.05
IndivQLearningParticleDNN/61_6_1	slugs_decentralized	shields/momentum_shield	True	-10	True	ParticleMomentum	False	False	10	-30	Individual_Deep_Q	1.0	simple_mlp	True	0.05	2500000	1	True	IndivQLearningParticleDNN/61_6_1_slugs_centralized	slugs_centralized	shields/momentum_shield	0.05
IndivQLearningParticleDNN/61_6_1	slugs_decentralized	shields/momentum_shield	True	-10	True	ParticleMomentum	False	False	10	-30	Individual_Deep_Q	1.0	simple_mlp	True	0.05	2500000	1	True	IndivQLearningParticleDNN/61_6_1_slugs_decentralized	slugs_decentralized	shields/momentum_shield	0.05
IndivQLearningParticleDNN/61_6_1	slugs_decentralized	shields/momentum_shield	True	-10	True	ParticleMomentum	False	False	10	-30	Individual_Deep_Q	1.0	simple_mlp	True	0.05	2500000	1	True	IndivQLearningParticleDNN/61_6_1_none	none		0.05
IndivQLearningParticleDNN/62_6_2	slugs_decentralized	shields/momentum_shield	True	-10	True	ParticleMomentum	False	False	10	-30	Individual_Deep_Q	1.0	simple_mlp	True	0.05	2500000	2	True	IndivQLearningParticleDNN/62_6_2_slugs_centralized	slugs_centralized	shields/momentum_shield	0.05
IndivQLearningParticleDNN/62_6_2	slugs_decentralized	shields/momentum_shield	True	-10	True	ParticleMomentum	False	False	10	-30	Individual_Deep_Q	1.0	simple_mlp	True	0.05	2500000	2	True	IndivQLearningParticleDNN/62_6_2_slugs_decentralized	slugs_decentralized	shields/momentum_shield	0.05
IndivQLearningParticleDNN/62_6_2	slugs_decentralized	shields/momentum_shield	True	-10	True	ParticleMomentum	False	False	10	-30	Individual_Deep_Q	1.0	simple_mlp	True	0.05	2500000	2	True	IndivQLearningParticleDNN/62_6_2_none	none		0.05
IndivQLearningParticleDNN/63_6_3	slugs_decentralized	shields/momentum_shield	True	-10	True	ParticleMomentum	False	False	10	-30	Individual_Deep_Q	1.0	simple_mlp	True	0.05	2500000	3	True	IndivQLearningParticleDNN/63_6_3_slugs_centralized	slugs_centralized	shields/momentum_shield	0.05
IndivQLearningParticleDNN/63_6_3	slugs_decentralized	shields/momentum_shield	True	-10	True	ParticleMomentum	False	False	10	-30	Individual_Deep_Q	1.0	simple_mlp	True	0.05	2500000	3	True	IndivQLearningParticleDNN/63_6_3_slugs_decentralized	slugs_decentralized	shields/momentum_shield	0.05
IndivQLearningParticleDNN/63_6_3	slugs_decentralized	shields/momentum_shield	True	-10	True	ParticleMomentum	False	False	10	-30	Individual_Deep_Q	1.0	simple_mlp	True	0.05	2500000	3	True	IndivQLearningParticleDNN/63_6_3_none	none		0.05
IndivQLearningParticleDNN/64_6_4	slugs_decentralized	shields/momentum_shield	True	-10	True	ParticleMomentum	False	False	10	-30	Individual_Deep_Q	1.0	simple_mlp	True	0.05	2500000	4	True	IndivQLearningParticleDNN/64_6_4_slugs_centralized	slugs_centralized	shields/momentum_shield	0.05
IndivQLearningParticleDNN/64_6_4	slugs_decentralized	shields/momentum_shield	True	-10	True	ParticleMomentum	False	False	10	-30	Individual_Deep_Q	1.0	simple_mlp	True	0.05	2500000	4	True	IndivQLearningParticleDNN/64_6_4_slugs_decentralized	slugs_decentralized	shields/momentum_shield	0.05
IndivQLearningParticleDNN/64_6_4	slugs_decentralized	shields/momentum_shield	True	-10	True	ParticleMomentum	False	False	10	-30	Individual_Deep_Q	1.0	simple_mlp	True	0.05	2500000	4	True	IndivQLearningParticleDNN/64_6_4_none	none		0.05
IndivQLearningParticleDNN/65_6_5	slugs_decentralized	shields/momentum_shield	True	-10	True	ParticleMomentum	False	False	10	-30	Individual_Deep_Q	1.0	simple_mlp	True	0.05	2500000	5	True	IndivQLearningParticleDNN/65_6_5_slugs_centralized	slugs_centralized	shields/momentum_shield	0.05
IndivQLearningParticleDNN/65_6_5	slugs_decentralized	shields/momentum_shield	True	-10	True	ParticleMomentum	False	False	10	-30	Individual_Deep_Q	1.0	simple_mlp	True	0.05	2500000	5	True	IndivQLearningParticleDNN/65_6_5_slugs_decentralized	slugs_decentralized	shields/momentum_shield	0.05
IndivQLearningParticleDNN/65_6_5	slugs_decentralized	shields/momentum_shield	True	-10	True	ParticleMomentum	False	False	10	-30	Individual_Deep_Q	1.0	simple_mlp	True	0.05	2500000	5	True	IndivQLearningParticleDNN/65_6_5_none	none		0.05
IndivQLearningParticleDNN/66_6_6	slugs_decentralized	shields/momentum_shield	True	-10	True	ParticleMomentum	False	False	10	-30	Individual_Deep_Q	1.0	simple_mlp	True	0.05	2500000	6	True	IndivQLearningParticleDNN/66_6_6_slugs_centralized	slugs_centralized	shields/momentum_shield	0.05
IndivQLearningParticleDNN/66_6_6	slugs_decentralized	shields/momentum_shield	True	-10	True	ParticleMomentum	False	False	10	-30	Individual_Deep_Q	1.0	simple_mlp	True	0.05	2500000	6	True	IndivQLearningParticleDNN/66_6_6_slugs_decentralized	slugs_decentralized	shields/momentum_shield	0.05
IndivQLearningParticleDNN/66_6_6	slugs_decentralized	shields/momentum_shield	True	-10	True	ParticleMomentum	False	False	10	-30	Individual_Deep_Q	1.0	simple_mlp	True	0.05	2500000	6	True	IndivQLearningParticleDNN/66_6_6_none	none		0.05
IndivQLearningParticleDNN/67_6_7	slugs_decentralized	shields/momentum_shield	True	-10	True	ParticleMomentum	False	False	10	-30	Individual_Deep_Q	1.0	simple_mlp	True	0.05	2500000	7	True	IndivQLearningParticleDNN/67_6_7_slugs_centralized	slugs_centralized	shields/momentum_shield	0.05
IndivQLearningParticleDNN/67_6_7	slugs_decentralized	shields/momentum_shield	True	-10	True	ParticleMomentum	False	False	10	-30	Individual_Deep_Q	1.0	simple_mlp	True	0.05	2500000	7	True	IndivQLearningParticleDNN/67_6_7_slugs_decentralized	slugs_decentralized	shields/momentum_shield	0.05
IndivQLearningParticleDNN/67_6_7	slugs_decentralized	shields/momentum_shield	True	-10	True	ParticleMomentum	False	False	10	-30	Individual_Deep_Q	1.0	simple_mlp	True	0.05	2500000	7	True	IndivQLearningParticleDNN/67_6_7_none	none		0.05
IndivQLearningParticleDNN/68_6_8	slugs_decentralized	shields/momentum_shield	True	-10	True	ParticleMomentum	False	False	10	-30	Individual_Deep_Q	1.0	simple_mlp	True	0.05	2500000	8	True	IndivQLearningParticleDNN/68_6_8_slugs_centralized	slugs_centralized	shields/momentum_shield	0.05
IndivQLearningParticleDNN/68_6_8	slugs_decentralized	shields/momentum_shield	True	-10	True	ParticleMomentum	False	False	10	-30	Individual_Deep_Q	1.0	simple_mlp	True	0.05	2500000	8	True	IndivQLearningParticleDNN/68_6_8_slugs_decentralized	slugs_decentralized	shields/momentum_shield	0.05
IndivQLearningParticleDNN/68_6_8	slugs_decentralized	shields/momentum_shield	True	-10	True	ParticleMomentum	False	False	10	-30	Individual_Deep_Q	1.0	simple_mlp	True	0.05	2500000	8	True	IndivQLearningParticleDNN/68_6_8_none	none		0.05
IndivQLearningParticleDNN/69_6_9	slugs_decentralized	shields/momentum_shield	True	-10	True	ParticleMomentum	False	False	10	-30	Individual_Deep_Q	1.0	simple_mlp	True	0.05	2500000	9	True	IndivQLearningParticleDNN/69_6_9_slugs_centralized	slugs_centralized	shields/momentum_shield	0.05
IndivQLearningParticleDNN/69_6_9	slugs_decentralized	shields/momentum_shield	True	-10	True	ParticleMomentum	False	False	10	-30	Individual_Deep_Q	1.0	simple_mlp	True	0.05	2500000	9	True	IndivQLearningParticleDNN/69_6_9_slugs_decentralized	slugs_decentralized	shields/momentum_shield	0.05
IndivQLearningParticleDNN/69_6_9	slugs_decentralized	shields/momentum_shield	True	-10	True	ParticleMomentum	False	False	10	-30	Individual_Deep_Q	1.0	simple_mlp	True	0.05	2500000	9	True	IndivQLearningParticleDNN/69_6_9_none	none		0.05
IndivQLearningParticleDNN/70_7_0	slugs_decentralized	shields/momentum_shield	True	-10	True	ParticleMomentum	False	False	10	-30	Individual_Deep_Q	1.0	simple_mlp	False	0.05	2500000	0	True	IndivQLearningParticleDNN/70_7_0_slugs_centralized	slugs_centralized	shields/momentum_shield	0.05
IndivQLearningParticleDNN/70_7_0	slugs_decentralized	shields/momentum_shield	True	-10	True	ParticleMomentum	False	False	10	-30	Individual_Deep_Q	1.0	simple_mlp	False	0.05	2500000	0	True	IndivQLearningParticleDNN/70_7_0_slugs_decentralized	slugs_decentralized	shields/momentum_shield	0.05
IndivQLearningParticleDNN/70_7_0	slugs_decentralized	shields/momentum_shield	True	-10	True	ParticleMomentum	False	False	10	-30	Individual_Deep_Q	1.0	simple_mlp	False	0.05	2500000	0	True	IndivQLearningParticleDNN/70_7_0_none	none		0.05
IndivQLearningParticleDNN/71_7_1	slugs_decentralized	shields/momentum_shield	True	-10	True	ParticleMomentum	False	False	10	-30	Individual_Deep_Q	1.0	simple_mlp	False	0.05	2500000	1	True	IndivQLearningParticleDNN/71_7_1_slugs_centralized	slugs_centralized	shields/momentum_shield	0.05
IndivQLearningParticleDNN/71_7_1	slugs_decentralized	shields/momentum_shield	True	-10	True	ParticleMomentum	False	False	10	-30	Individual_Deep_Q	1.0	simple_mlp	False	0.05	2500000	1	True	IndivQLearningParticleDNN/71_7_1_slugs_decentralized	slugs_decentralized	shields/momentum_shield	0.05
IndivQLearningParticleDNN/71_7_1	slugs_decentralized	shields/momentum_shield	True	-10	True	ParticleMomentum	False	False	10	-30	Individual_Deep_Q	1.0	simple_mlp	False	0.05	2500000	1	True	IndivQLearningParticleDNN/71_7_1_none	none		0.05
IndivQLearningParticleDNN/72_7_2	slugs_decentralized	shields/momentum_shield	True	-10	True	ParticleMomentum	False	False	10	-30	Individual_Deep_Q	1.0	simple_mlp	False	0.05	2500000	2	True	IndivQLearningParticleDNN/72_7_2_slugs_centralized	slugs_centralized	shields/momentum_shield	0.05
IndivQLearningParticleDNN/72_7_2	slugs_decentralized	shields/momentum_shield	True	-10	True	ParticleMomentum	False	False	10	-30	Individual_Deep_Q	1.0	simple_mlp	False	0.05	2500000	2	True	IndivQLearningParticleDNN/72_7_2_slugs_decentralized	slugs_decentralized	shields/momentum_shield	0.05
IndivQLearningParticleDNN/72_7_2	slugs_decentralized	shields/momentum_shield	True	-10	True	ParticleMomentum	False	False	10	-30	Individual_Deep_Q	1.0	simple_mlp	False	0.05	2500000	2	True	IndivQLearningParticleDNN/72_7_2_none	none		0.05
IndivQLearningParticleDNN/73_7_3	slugs_decentralized	shields/momentum_shield	True	-10	True	ParticleMomentum	False	False	10	-30	Individual_Deep_Q	1.0	simple_mlp	False	0.05	2500000	3	True	IndivQLearningParticleDNN/73_7_3_slugs_centralized	slugs_centralized	shields/momentum_shield	0.05
IndivQLearningParticleDNN/73_7_3	slugs_decentralized	shields/momentum_shield	True	-10	True	ParticleMomentum	False	False	10	-30	Individual_Deep_Q	1.0	simple_mlp	False	0.05	2500000	3	True	IndivQLearningParticleDNN/73_7_3_slugs_decentralized	slugs_decentralized	shields/momentum_shield	0.05
IndivQLearningParticleDNN/73_7_3	slugs_decentralized	shields/momentum_shield	True	-10	True	ParticleMomentum	False	False	10	-30	Individual_Deep_Q	1.0	simple_mlp	False	0.05	2500000	3	True	IndivQLearningParticleDNN/73_7_3_none	none		0.05
IndivQLearningParticleDNN/74_7_4	slugs_decentralized	shields/momentum_shield	True	-10	True	ParticleMomentum	False	False	10	-30	Individual_Deep_Q	1.0	simple_mlp	False	0.05	2500000	4	True	IndivQLearningParticleDNN/74_7_4_slugs_centralized	slugs_centralized	shields/momentum_shield	0.05
IndivQLearningParticleDNN/74_7_4	slugs_decentralized	shields/momentum_shield	True	-10	True	ParticleMomentum	False	False	10	-30	Individual_Deep_Q	1.0	simple_mlp	False	0.05	2500000	4	True	IndivQLearningParticleDNN/74_7_4_slugs_decentralized	slugs_decentralized	shields/momentum_shield	0.05
IndivQLearningParticleDNN/74_7_4	slugs_decentralized	shields/momentum_shield	True	-10	True	ParticleMomentum	False	False	10	-30	Individual_Deep_Q	1.0	simple_mlp	False	0.05	2500000	4	True	IndivQLearningParticleDNN/74_7_4_none	none		0.05
IndivQLearningParticleDNN/75_7_5	slugs_decentralized	shields/momentum_shield	True	-10	True	ParticleMomentum	False	False	10	-30	Individual_Deep_Q	1.0	simple_mlp	False	0.05	2500000	5	True	IndivQLearningParticleDNN/75_7_5_slugs_centralized	slugs_centralized	shields/momentum_shield	0.05
IndivQLearningParticleDNN/75_7_5	slugs_decentralized	shields/momentum_shield	True	-10	True	ParticleMomentum	False	False	10	-30	Individual_Deep_Q	1.0	simple_mlp	False	0.05	2500000	5	True	IndivQLearningParticleDNN/75_7_5_slugs_decentralized	slugs_decentralized	shields/momentum_shield	0.05
IndivQLearningParticleDNN/75_7_5	slugs_decentralized	shields/momentum_shield	True	-10	True	ParticleMomentum	False	False	10	-30	Individual_Deep_Q	1.0	simple_mlp	False	0.05	2500000	5	True	IndivQLearningParticleDNN/75_7_5_none	none		0.05
IndivQLearningParticleDNN/76_7_6	slugs_decentralized	shields/momentum_shield	True	-10	True	ParticleMomentum	False	False	10	-30	Individual_Deep_Q	1.0	simple_mlp	False	0.05	2500000	6	True	IndivQLearningParticleDNN/76_7_6_slugs_centralized	slugs_centralized	shields/momentum_shield	0.05
IndivQLearningParticleDNN/76_7_6	slugs_decentralized	shields/momentum_shield	True	-10	True	ParticleMomentum	False	False	10	-30	Individual_Deep_Q	1.0	simple_mlp	False	0.05	2500000	6	True	IndivQLearningParticleDNN/76_7_6_slugs_decentralized	slugs_decentralized	shields/momentum_shield	0.05
IndivQLearningParticleDNN/76_7_6	slugs_decentralized	shields/momentum_shield	True	-10	True	ParticleMomentum	False	False	10	-30	Individual_Deep_Q	1.0	simple_mlp	False	0.05	2500000	6	True	IndivQLearningParticleDNN/76_7_6_none	none		0.05
IndivQLearningParticleDNN/77_7_7	slugs_decentralized	shields/momentum_shield	True	-10	True	ParticleMomentum	False	False	10	-30	Individual_Deep_Q	1.0	simple_mlp	False	0.05	2500000	7	True	IndivQLearningParticleDNN/77_7_7_slugs_centralized	slugs_centralized	shields/momentum_shield	0.05
IndivQLearningParticleDNN/77_7_7	slugs_decentralized	shields/momentum_shield	True	-10	True	ParticleMomentum	False	False	10	-30	Individual_Deep_Q	1.0	simple_mlp	False	0.05	2500000	7	True	IndivQLearningParticleDNN/77_7_7_slugs_decentralized	slugs_decentralized	shields/momentum_shield	0.05
IndivQLearningParticleDNN/77_7_7	slugs_decentralized	shields/momentum_shield	True	-10	True	ParticleMomentum	False	False	10	-30	Individual_Deep_Q	1.0	simple_mlp	False	0.05	2500000	7	True	IndivQLearningParticleDNN/77_7_7_none	none		0.05
IndivQLearningParticleDNN/78_7_8	slugs_decentralized	shields/momentum_shield	True	-10	True	ParticleMomentum	False	False	10	-30	Individual_Deep_Q	1.0	simple_mlp	False	0.05	2500000	8	True	IndivQLearningParticleDNN/78_7_8_slugs_centralized	slugs_centralized	shields/momentum_shield	0.05
IndivQLearningParticleDNN/78_7_8	slugs_decentralized	shields/momentum_shield	True	-10	True	ParticleMomentum	False	False	10	-30	Individual_Deep_Q	1.0	simple_mlp	False	0.05	2500000	8	True	IndivQLearningParticleDNN/78_7_8_slugs_decentralized	slugs_decentralized	shields/momentum_shield	0.05
IndivQLearningParticleDNN/78_7_8	slugs_decentralized	shields/momentum_shield	True	-10	True	ParticleMomentum	False	False	10	-30	Individual_Deep_Q	1.0	simple_mlp	False	0.05	2500000	8	True	IndivQLearningParticleDNN/78_7_8_none	none		0.05
IndivQLearningParticleDNN/79_7_9	slugs_decentralized	shields/momentum_shield	True	-10	True	ParticleMomentum	False	False	10	-30	Individual_Deep_Q	1.0	simple_mlp	False	0.05	2500000	9	True	IndivQLearningParticleDNN/79_7_9_slugs_centralized	slugs_centralized	shields/momentum_shield	0.05
IndivQLearningParticleDNN/79_7_9	slugs_decentralized	shields/momentum_shield	True	-10	True	ParticleMomentum	False	False	10	-30	Individual_Deep_Q	1.0	simple_mlp	False	0.05	2500000	9	True	IndivQLearningParticleDNN/79_7_9_slugs_decentralized	slugs_decentralized	shields/momentum_shield	0.05
IndivQLearningParticleDNN/79_7_9	slugs_decentralized	shields/momentum_shield	True	-10	True	ParticleMomentum	False	False	10	-30	Individual_Deep_Q	1.0	simple_mlp	False	0.05	2500000	9	True	IndivQLearningParticleDNN/79_7_9_none	none		0.05
IndivQLearningParticleDNN/80_8_0	none		True	-10	True	ParticleMomentum	True	False	10	-30	Individual_Deep_Q	1.0	simple_mlp	True	0.05	2500000	0	True	IndivQLearningParticleDNN/80_8_0_slugs_centralized	slugs_centralized	shields/momentum_shield	0.05
IndivQLearningParticleDNN/80_8_0	none		True	-10	True	ParticleMomentum	True	False	10	-30	Individual_Deep_Q	1.0	simple_mlp	True	0.05	2500000	0	True	IndivQLearningParticleDNN/80_8_0_slugs_decentralized	slugs_decentralized	shields/momentum_shield	0.05
IndivQLearningParticleDNN/80_8_0	none		True	-10	True	ParticleMomentum	True	False	10	-30	Individual_Deep_Q	1.0	simple_mlp	True	0.05	2500000	0	True	IndivQLearningParticleDNN/80_8_0_none	none		0.05
IndivQLearningParticleDNN/81_8_1	none		True	-10	True	ParticleMomentum	True	False	10	-30	Individual_Deep_Q	1.0	simple_mlp	True	0.05	2500000	1	True	IndivQLearningParticleDNN/81_8_1_slugs_centralized	slugs_centralized	shields/momentum_shield	0.05
IndivQLearningParticleDNN/81_8_1	none		True	-10	True	ParticleMomentum	True	False	10	-30	Individual_Deep_Q	1.0	simple_mlp	True	0.05	2500000	1	True	IndivQLearningParticleDNN/81_8_1_slugs_decentralized	slugs_decentralized	shields/momentum_shield	0.05
IndivQLearningParticleDNN/81_8_1	none		True	-10	True	ParticleMomentum	True	False	10	-30	Individual_Deep_Q	1.0	simple_mlp	True	0.05	2500000	1	True	IndivQLearningParticleDNN/81_8_1_none	none		0.05
IndivQLearningParticleDNN/82_8_2	none		True	-10	True	ParticleMomentum	True	False	10	-30	Individual_Deep_Q	1.0	simple_mlp	True	0.05	2500000	2	True	IndivQLearningParticleDNN/82_8_2_slugs_centralized	slugs_centralized	shields/momentum_shield	0.05
IndivQLearningParticleDNN/82_8_2	none		True	-10	True	ParticleMomentum	True	False	10	-30	Individual_Deep_Q	1.0	simple_mlp	True	0.05	2500000	2	True	IndivQLearningParticleDNN/82_8_2_slugs_decentralized	slugs_decentralized	shields/momentum_shield	0.05
IndivQLearningParticleDNN/82_8_2	none		True	-10	True	ParticleMomentum	True	False	10	-30	Individual_Deep_Q	1.0	simple_mlp	True	0.05	2500000	2	True	IndivQLearningParticleDNN/82_8_2_none	none		0.05
IndivQLearningParticleDNN/83_8_3	none		True	-10	True	ParticleMomentum	True	False	10	-30	Individual_Deep_Q	1.0	simple_mlp	True	0.05	2500000	3	True	IndivQLearningParticleDNN/83_8_3_slugs_centralized	slugs_centralized	shields/momentum_shield	0.05
IndivQLearningParticleDNN/83_8_3	none		True	-10	True	ParticleMomentum	True	False	10	-30	Individual_Deep_Q	1.0	simple_mlp	True	0.05	2500000	3	True	IndivQLearningParticleDNN/83_8_3_slugs_decentralized	slugs_decentralized	shields/momentum_shield	0.05
IndivQLearningParticleDNN/83_8_3	none		True	-10	True	ParticleMomentum	True	False	10	-30	Individual_Deep_Q	1.0	simple_mlp	True	0.05	2500000	3	True	IndivQLearningParticleDNN/83_8_3_none	none		0.05
IndivQLearningParticleDNN/84_8_4	none		True	-10	True	ParticleMomentum	True	False	10	-30	Individual_Deep_Q	1.0	simple_mlp	True	0.05	2500000	4	True	IndivQLearningParticleDNN/84_8_4_slugs_centralized	slugs_centralized	shields/momentum_shield	0.05
IndivQLearningParticleDNN/84_8_4	none		True	-10	True	ParticleMomentum	True	False	10	-30	Individual_Deep_Q	1.0	simple_mlp	True	0.05	2500000	4	True	IndivQLearningParticleDNN/84_8_4_slugs_decentralized	slugs_decentralized	shields/momentum_shield	0.05
IndivQLearningParticleDNN/84_8_4	none		True	-10	True	ParticleMomentum	True	False	10	-30	Individual_Deep_Q	1.0	simple_mlp	True	0.05	2500000	4	True	IndivQLearningParticleDNN/84_8_4_none	none		0.05
IndivQLearningParticleDNN/85_8_5	none		True	-10	True	ParticleMomentum	True	False	10	-30	Individual_Deep_Q	1.0	simple_mlp	True	0.05	2500000	5	True	IndivQLearningParticleDNN/85_8_5_slugs_centralized	slugs_centralized	shields/momentum_shield	0.05
IndivQLearningParticleDNN/85_8_5	none		True	-10	True	ParticleMomentum	True	False	10	-30	Individual_Deep_Q	1.0	simple_mlp	True	0.05	2500000	5	True	IndivQLearningParticleDNN/85_8_5_slugs_decentralized	slugs_decentralized	shields/momentum_shield	0.05
IndivQLearningParticleDNN/85_8_5	none		True	-10	True	ParticleMomentum	True	False	10	-30	Individual_Deep_Q	1.0	simple_mlp	True	0.05	2500000	5	True	IndivQLearningParticleDNN/85_8_5_none	none		0.05
IndivQLearningParticleDNN/86_8_6	none		True	-10	True	ParticleMomentum	True	False	10	-30	Individual_Deep_Q	1.0	simple_mlp	True	0.05	2500000	6	True	IndivQLearningParticleDNN/86_8_6_slugs_centralized	slugs_centralized	shields/momentum_shield	0.05
IndivQLearningParticleDNN/86_8_6	none		True	-10	True	ParticleMomentum	True	False	10	-30	Individual_Deep_Q	1.0	simple_mlp	True	0.05	2500000	6	True	IndivQLearningParticleDNN/86_8_6_slugs_decentralized	slugs_decentralized	shields/momentum_shield	0.05
IndivQLearningParticleDNN/86_8_6	none		True	-10	True	ParticleMomentum	True	False	10	-30	Individual_Deep_Q	1.0	simple_mlp	True	0.05	2500000	6	True	IndivQLearningParticleDNN/86_8_6_none	none		0.05
IndivQLearningParticleDNN/87_8_7	none		True	-10	True	ParticleMomentum	True	False	10	-30	Individual_Deep_Q	1.0	simple_mlp	True	0.05	2500000	7	True	IndivQLearningParticleDNN/87_8_7_slugs_centralized	slugs_centralized	shields/momentum_shield	0.05
IndivQLearningParticleDNN/87_8_7	none		True	-10	True	ParticleMomentum	True	False	10	-30	Individual_Deep_Q	1.0	simple_mlp	True	0.05	2500000	7	True	IndivQLearningParticleDNN/87_8_7_slugs_decentralized	slugs_decentralized	shields/momentum_shield	0.05
IndivQLearningParticleDNN/87_8_7	none		True	-10	True	ParticleMomentum	True	False	10	-30	Individual_Deep_Q	1.0	simple_mlp	True	0.05	2500000	7	True	IndivQLearningParticleDNN/87_8_7_none	none		0.05
IndivQLearningParticleDNN/88_8_8	none		True	-10	True	ParticleMomentum	True	False	10	-30	Individual_Deep_Q	1.0	simple_mlp	True	0.05	2500000	8	True	IndivQLearningParticleDNN/88_8_8_slugs_centralized	slugs_centralized	shields/momentum_shield	0.05
IndivQLearningParticleDNN/88_8_8	none		True	-10	True	ParticleMomentum	True	False	10	-30	Individual_Deep_Q	1.0	simple_mlp	True	0.05	2500000	8	True	IndivQLearningParticleDNN/88_8_8_slugs_decentralized	slugs_decentralized	shields/momentum_shield	0.05
IndivQLearningParticleDNN/88_8_8	none		True	-10	True	ParticleMomentum	True	False	10	-30	Individual_Deep_Q	1.0	simple_mlp	True	0.05	2500000	8	True	IndivQLearningParticleDNN/88_8_8_none	none		0.05
IndivQLearningParticleDNN/89_8_9	none		True	-10	True	ParticleMomentum	True	False	10	-30	Individual_Deep_Q	1.0	simple_mlp	True	0.05	2500000	9	True	IndivQLearningParticleDNN/89_8_9_slugs_centralized	slugs_centralized	shields/momentum_shield	0.05
IndivQLearningParticleDNN/89_8_9	none		True	-10	True	ParticleMomentum	True	False	10	-30	Individual_Deep_Q	1.0	simple_mlp	True	0.05	2500000	9	True	IndivQLearningParticleDNN/89_8_9_slugs_decentralized	slugs_decentralized	shields/momentum_shield	0.05
IndivQLearningParticleDNN/89_8_9	none		True	-10	True	ParticleMomentum	True	False	10	-30	Individual_Deep_Q	1.0	simple_mlp	True	0.05	2500000	9	True	IndivQLearningParticleDNN/89_8_9_none	none		0.05
IndivQLearningParticleDNN/90_9_0	none		True	-10	True	ParticleMomentum	True	False	10	-30	Individual_Deep_Q	1.0	simple_mlp	False	0.05	2500000	0	True	IndivQLearningParticleDNN/90_9_0_slugs_centralized	slugs_centralized	shields/momentum_shield	0.05
IndivQLearningParticleDNN/90_9_0	none		True	-10	True	ParticleMomentum	True	False	10	-30	Individual_Deep_Q	1.0	simple_mlp	False	0.05	2500000	0	True	IndivQLearningParticleDNN/90_9_0_slugs_decentralized	slugs_decentralized	shields/momentum_shield	0.05
IndivQLearningParticleDNN/90_9_0	none		True	-10	True	ParticleMomentum	True	False	10	-30	Individual_Deep_Q	1.0	simple_mlp	False	0.05	2500000	0	True	IndivQLearningParticleDNN/90_9_0_none	none		0.05
IndivQLearningParticleDNN/91_9_1	none		True	-10	True	ParticleMomentum	True	False	10	-30	Individual_Deep_Q	1.0	simple_mlp	False	0.05	2500000	1	True	IndivQLearningParticleDNN/91_9_1_slugs_centralized	slugs_centralized	shields/momentum_shield	0.05
IndivQLearningParticleDNN/91_9_1	none		True	-10	True	ParticleMomentum	True	False	10	-30	Individual_Deep_Q	1.0	simple_mlp	False	0.05	2500000	1	True	IndivQLearningParticleDNN/91_9_1_slugs_decentralized	slugs_decentralized	shields/momentum_shield	0.05
IndivQLearningParticleDNN/91_9_1	none		True	-10	True	ParticleMomentum	True	False	10	-30	Individual_Deep_Q	1.0	simple_mlp	False	0.05	2500000	1	True	IndivQLearningParticleDNN/91_9_1_none	none		0.05
IndivQLearningParticleDNN/92_9_2	none		True	-10	True	ParticleMomentum	True	False	10	-30	Individual_Deep_Q	1.0	simple_mlp	False	0.05	2500000	2	True	IndivQLearningParticleDNN/92_9_2_slugs_centralized	slugs_centralized	shields/momentum_shield	0.05
IndivQLearningParticleDNN/92_9_2	none		True	-10	True	ParticleMomentum	True	False	10	-30	Individual_Deep_Q	1.0	simple_mlp	False	0.05	2500000	2	True	IndivQLearningParticleDNN/92_9_2_slugs_decentralized	slugs_decentralized	shields/momentum_shield	0.05
IndivQLearningParticleDNN/92_9_2	none		True	-10	True	ParticleMomentum	True	False	10	-30	Individual_Deep_Q	1.0	simple_mlp	False	0.05	2500000	2	True	IndivQLearningParticleDNN/92_9_2_none	none		0.05
IndivQLearningParticleDNN/93_9_3	none		True	-10	True	ParticleMomentum	True	False	10	-30	Individual_Deep_Q	1.0	simple_mlp	False	0.05	2500000	3	True	IndivQLearningParticleDNN/93_9_3_slugs_centralized	slugs_centralized	shields/momentum_shield	0.05
IndivQLearningParticleDNN/93_9_3	none		True	-10	True	ParticleMomentum	True	False	10	-30	Individual_Deep_Q	1.0	simple_mlp	False	0.05	2500000	3	True	IndivQLearningParticleDNN/93_9_3_slugs_decentralized	slugs_decentralized	shields/momentum_shield	0.05
IndivQLearningParticleDNN/93_9_3	none		True	-10	True	ParticleMomentum	True	False	10	-30	Individual_Deep_Q	1.0	simple_mlp	False	0.05	2500000	3	True	IndivQLearningParticleDNN/93_9_3_none	none		0.05
IndivQLearningParticleDNN/94_9_4	none		True	-10	True	ParticleMomentum	True	False	10	-30	Individual_Deep_Q	1.0	simple_mlp	False	0.05	2500000	4	True	IndivQLearningParticleDNN/94_9_4_slugs_centralized	slugs_centralized	shields/momentum_shield	0.05
IndivQLearningParticleDNN/94_9_4	none		True	-10	True	ParticleMomentum	True	False	10	-30	Individual_Deep_Q	1.0	simple_mlp	False	0.05	2500000	4	True	IndivQLearningParticleDNN/94_9_4_slugs_decentralized	slugs_decentralized	shields/momentum_shield	0.05
IndivQLearningParticleDNN/94_9_4	none		True	-10	True	ParticleMomentum	True	False	10	-30	Individual_Deep_Q	1.0	simple_mlp	False	0.05	2500000	4	True	IndivQLearningParticleDNN/94_9_4_none	none		0.05
IndivQLearningParticleDNN/95_9_5	none		True	-10	True	ParticleMomentum	True	False	10	-30	Individual_Deep_Q	1.0	simple_mlp	False	0.05	2500000	5	True	IndivQLearningParticleDNN/95_9_5_slugs_centralized	slugs_centralized	shields/momentum_shield	0.05
IndivQLearningParticleDNN/95_9_5	none		True	-10	True	ParticleMomentum	True	False	10	-30	Individual_Deep_Q	1.0	simple_mlp	False	0.05	2500000	5	True	IndivQLearningParticleDNN/95_9_5_slugs_decentralized	slugs_decentralized	shields/momentum_shield	0.05
IndivQLearningParticleDNN/95_9_5	none		True	-10	True	ParticleMomentum	True	False	10	-30	Individual_Deep_Q	1.0	simple_mlp	False	0.05	2500000	5	True	IndivQLearningParticleDNN/95_9_5_none	none		0.05
IndivQLearningParticleDNN/96_9_6	none		True	-10	True	ParticleMomentum	True	False	10	-30	Individual_Deep_Q	1.0	simple_mlp	False	0.05	2500000	6	True	IndivQLearningParticleDNN/96_9_6_slugs_centralized	slugs_centralized	shields/momentum_shield	0.05
IndivQLearningParticleDNN/96_9_6	none		True	-10	True	ParticleMomentum	True	False	10	-30	Individual_Deep_Q	1.0	simple_mlp	False	0.05	2500000	6	True	IndivQLearningParticleDNN/96_9_6_slugs_decentralized	slugs_decentralized	shields/momentum_shield	0.05
IndivQLearningParticleDNN/96_9_6	none		True	-10	True	ParticleMomentum	True	False	10	-30	Individual_Deep_Q	1.0	simple_mlp	False	0.05	2500000	6	True	IndivQLearningParticleDNN/96_9_6_none	none		0.05
IndivQLearningParticleDNN/97_9_7	none		True	-10	True	ParticleMomentum	True	False	10	-30	Individual_Deep_Q	1.0	simple_mlp	False	0.05	2500000	7	True	IndivQLearningParticleDNN/97_9_7_slugs_centralized	slugs_centralized	shields/momentum_shield	0.05
IndivQLearningParticleDNN/97_9_7	none		True	-10	True	ParticleMomentum	True	False	10	-30	Individual_Deep_Q	1.0	simple_mlp	False	0.05	2500000	7	True	IndivQLearningParticleDNN/97_9_7_slugs_decentralized	slugs_decentralized	shields/momentum_shield	0.05
IndivQLearningParticleDNN/97_9_7	none		True	-10	True	ParticleMomentum	True	False	10	-30	Individual_Deep_Q	1.0	simple_mlp	False	0.05	2500000	7	True	IndivQLearningParticleDNN/97_9_7_none	none		0.05
IndivQLearningParticleDNN/98_9_8	none		True	-10	True	ParticleMomentum	True	False	10	-30	Individual_Deep_Q	1.0	simple_mlp	False	0.05	2500000	8	True	IndivQLearningParticleDNN/98_9_8_slugs_centralized	slugs_centralized	shields/momentum_shield	0.05
IndivQLearningParticleDNN/98_9_8	none		True	-10	True	ParticleMomentum	True	False	10	-30	Individual_Deep_Q	1.0	simple_mlp	False	0.05	2500000	8	True	IndivQLearningParticleDNN/98_9_8_slugs_decentralized	slugs_decentralized	shields/momentum_shield	0.05
IndivQLearningParticleDNN/98_9_8	none		True	-10	True	ParticleMomentum	True	False	10	-30	Individual_Deep_Q	1.0	simple_mlp	False	0.05	2500000	8	True	IndivQLearningParticleDNN/98_9_8_none	none		0.05
IndivQLearningParticleDNN/99_9_9	none		True	-10	True	ParticleMomentum	True	False	10	-30	Individual_Deep_Q	1.0	simple_mlp	False	0.05	2500000	9	True	IndivQLearningParticleDNN/99_9_9_slugs_centralized	slugs_centralized	shields/momentum_shield	0.05
IndivQLearningParticleDNN/99_9_9	none		True	-10	True	ParticleMomentum	True	False	10	-30	Individual_Deep_Q	1.0	simple_mlp	False	0.05	2500000	9	True	IndivQLearningParticleDNN/99_9_9_slugs_decentralized	slugs_decentralized	shields/momentum_shield	0.05
IndivQLearningParticleDNN/99_9_9	none		True	-10	True	ParticleMomentum	True	False	10	-30	Individual_Deep_Q	1.0	simple_mlp	False	0.05	2500000	9	True	IndivQLearningParticleDNN/99_9_9_none	none		0.05
IndivQLearningParticleDNN/100_10_0	none		True	-10	True	ParticleMomentum	False	False	10	-30	Individual_Deep_Q	1.0	simple_mlp	True	0.05	2500000	0	True	IndivQLearningParticleDNN/100_10_0_slugs_centralized	slugs_centralized	shields/momentum_shield	0.05
IndivQLearningParticleDNN/100_10_0	none		True	-10	True	ParticleMomentum	False	False	10	-30	Individual_Deep_Q	1.0	simple_mlp	True	0.05	2500000	0	True	IndivQLearningParticleDNN/100_10_0_slugs_decentralized	slugs_decentralized	shields/momentum_shield	0.05
IndivQLearningParticleDNN/100_10_0	none		True	-10	True	ParticleMomentum	False	False	10	-30	Individual_Deep_Q	1.0	simple_mlp	True	0.05	2500000	0	True	IndivQLearningParticleDNN/100_10_0_none	none		0.05
IndivQLearningParticleDNN/101_10_1	none		True	-10	True	ParticleMomentum	False	False	10	-30	Individual_Deep_Q	1.0	simple_mlp	True	0.05	2500000	1	True	IndivQLearningParticleDNN/101_10_1_slugs_centralized	slugs_centralized	shields/momentum_shield	0.05
IndivQLearningParticleDNN/101_10_1	none		True	-10	True	ParticleMomentum	False	False	10	-30	Individual_Deep_Q	1.0	simple_mlp	True	0.05	2500000	1	True	IndivQLearningParticleDNN/101_10_1_slugs_decentralized	slugs_decentralized	shields/momentum_shield	0.05
IndivQLearningParticleDNN/101_10_1	none		True	-10	True	ParticleMomentum	False	False	10	-30	Individual_Deep_Q	1.0	simple_mlp	True	0.05	2500000	1	True	IndivQLearningParticleDNN/101_10_1_none	none		0.05
IndivQLearningParticleDNN/102_10_2	none		True	-10	True	ParticleMomentum	False	False	10	-30	Individual_Deep_Q	1.0	simple_mlp	True	0.05	2500000	2	True	IndivQLearningParticleDNN/102_10_2_slugs_centralized	slugs_centralized	shields/momentum_shield	0.05
IndivQLearningParticleDNN/102_10_2	none		True	-10	True	ParticleMomentum	False	False	10	-30	Individual_Deep_Q	1.0	simple_mlp	True	0.05	2500000	2	True	IndivQLearningParticleDNN/102_10_2_slugs_decentralized	slugs_decentralized	shields/momentum_shield	0.05
IndivQLearningParticleDNN/102_10_2	none		True	-10	True	ParticleMomentum	False	False	10	-30	Individual_Deep_Q	1.0	simple_mlp	True	0.05	2500000	2	True	IndivQLearningParticleDNN/102_10_2_none	none		0.05
IndivQLearningParticleDNN/103_10_3	none		True	-10	True	ParticleMomentum	False	False	10	-30	Individual_Deep_Q	1.0	simple_mlp	True	0.05	2500000	3	True	IndivQLearningParticleDNN/103_10_3_slugs_centralized	slugs_centralized	shields/momentum_shield	0.05
IndivQLearningParticleDNN/103_10_3	none		True	-10	True	ParticleMomentum	False	False	10	-30	Individual_Deep_Q	1.0	simple_mlp	True	0.05	2500000	3	True	IndivQLearningParticleDNN/103_10_3_slugs_decentralized	slugs_decentralized	shields/momentum_shield	0.05
IndivQLearningParticleDNN/103_10_3	none		True	-10	True	ParticleMomentum	False	False	10	-30	Individual_Deep_Q	1.0	simple_mlp	True	0.05	2500000	3	True	IndivQLearningParticleDNN/103_10_3_none	none		0.05
IndivQLearningParticleDNN/104_10_4	none		True	-10	True	ParticleMomentum	False	False	10	-30	Individual_Deep_Q	1.0	simple_mlp	True	0.05	2500000	4	True	IndivQLearningParticleDNN/104_10_4_slugs_centralized	slugs_centralized	shields/momentum_shield	0.05
IndivQLearningParticleDNN/104_10_4	none		True	-10	True	ParticleMomentum	False	False	10	-30	Individual_Deep_Q	1.0	simple_mlp	True	0.05	2500000	4	True	IndivQLearningParticleDNN/104_10_4_slugs_decentralized	slugs_decentralized	shields/momentum_shield	0.05
IndivQLearningParticleDNN/104_10_4	none		True	-10	True	ParticleMomentum	False	False	10	-30	Individual_Deep_Q	1.0	simple_mlp	True	0.05	2500000	4	True	IndivQLearningParticleDNN/104_10_4_none	none		0.05
IndivQLearningParticleDNN/105_10_5	none		True	-10	True	ParticleMomentum	False	False	10	-30	Individual_Deep_Q	1.0	simple_mlp	True	0.05	2500000	5	True	IndivQLearningParticleDNN/105_10_5_slugs_centralized	slugs_centralized	shields/momentum_shield	0.05
IndivQLearningParticleDNN/105_10_5	none		True	-10	True	ParticleMomentum	False	False	10	-30	Individual_Deep_Q	1.0	simple_mlp	True	0.05	2500000	5	True	IndivQLearningParticleDNN/105_10_5_slugs_decentralized	slugs_decentralized	shields/momentum_shield	0.05
IndivQLearningParticleDNN/105_10_5	none		True	-10	True	ParticleMomentum	False	False	10	-30	Individual_Deep_Q	1.0	simple_mlp	True	0.05	2500000	5	True	IndivQLearningParticleDNN/105_10_5_none	none		0.05
IndivQLearningParticleDNN/106_10_6	none		True	-10	True	ParticleMomentum	False	False	10	-30	Individual_Deep_Q	1.0	simple_mlp	True	0.05	2500000	6	True	IndivQLearningParticleDNN/106_10_6_slugs_centralized	slugs_centralized	shields/momentum_shield	0.05
IndivQLearningParticleDNN/106_10_6	none		True	-10	True	ParticleMomentum	False	False	10	-30	Individual_Deep_Q	1.0	simple_mlp	True	0.05	2500000	6	True	IndivQLearningParticleDNN/106_10_6_slugs_decentralized	slugs_decentralized	shields/momentum_shield	0.05
IndivQLearningParticleDNN/106_10_6	none		True	-10	True	ParticleMomentum	False	False	10	-30	Individual_Deep_Q	1.0	simple_mlp	True	0.05	2500000	6	True	IndivQLearningParticleDNN/106_10_6_none	none		0.05
IndivQLearningParticleDNN/107_10_7	none		True	-10	True	ParticleMomentum	False	False	10	-30	Individual_Deep_Q	1.0	simple_mlp	True	0.05	2500000	7	True	IndivQLearningParticleDNN/107_10_7_slugs_centralized	slugs_centralized	shields/momentum_shield	0.05
IndivQLearningParticleDNN/107_10_7	none		True	-10	True	ParticleMomentum	False	False	10	-30	Individual_Deep_Q	1.0	simple_mlp	True	0.05	2500000	7	True	IndivQLearningParticleDNN/107_10_7_slugs_decentralized	slugs_decentralized	shields/momentum_shield	0.05
IndivQLearningParticleDNN/107_10_7	none		True	-10	True	ParticleMomentum	False	False	10	-30	Individual_Deep_Q	1.0	simple_mlp	True	0.05	2500000	7	True	IndivQLearningParticleDNN/107_10_7_none	none		0.05
IndivQLearningParticleDNN/108_10_8	none		True	-10	True	ParticleMomentum	False	False	10	-30	Individual_Deep_Q	1.0	simple_mlp	True	0.05	2500000	8	True	IndivQLearningParticleDNN/108_10_8_slugs_centralized	slugs_centralized	shields/momentum_shield	0.05
IndivQLearningParticleDNN/108_10_8	none		True	-10	True	ParticleMomentum	False	False	10	-30	Individual_Deep_Q	1.0	simple_mlp	True	0.05	2500000	8	True	IndivQLearningParticleDNN/108_10_8_slugs_decentralized	slugs_decentralized	shields/momentum_shield	0.05
IndivQLearningParticleDNN/108_10_8	none		True	-10	True	ParticleMomentum	False	False	10	-30	Individual_Deep_Q	1.0	simple_mlp	True	0.05	2500000	8	True	IndivQLearningParticleDNN/108_10_8_none	none		0.05
IndivQLearningParticleDNN/109_10_9	none		True	-10	True	ParticleMomentum	False	False	10	-30	Individual_Deep_Q	1.0	simple_mlp	True	0.05	2500000	9	True	IndivQLearningParticleDNN/109_10_9_slugs_centralized	slugs_centralized	shields/momentum_shield	0.05
IndivQLearningParticleDNN/109_10_9	none		True	-10	True	ParticleMomentum	False	False	10	-30	Individual_Deep_Q	1.0	simple_mlp	True	0.05	2500000	9	True	IndivQLearningParticleDNN/109_10_9_slugs_decentralized	slugs_decentralized	shields/momentum_shield	0.05
IndivQLearningParticleDNN/109_10_9	none		True	-10	True	ParticleMomentum	False	False	10	-30	Individual_Deep_Q	1.0	simple_mlp	True	0.05	2500000	9	True	IndivQLearningParticleDNN/109_10_9_none	none		0.05
IndivQLearningParticleDNN/110_11_0	none		True	-10	True	ParticleMomentum	False	False	10	-30	Individual_Deep_Q	1.0	simple_mlp	False	0.05	2500000	0	True	IndivQLearningParticleDNN/110_11_0_slugs_centralized	slugs_centralized	shields/momentum_shield	0.05
IndivQLearningParticleDNN/110_11_0	none		True	-10	True	ParticleMomentum	False	False	10	-30	Individual_Deep_Q	1.0	simple_mlp	False	0.05	2500000	0	True	IndivQLearningParticleDNN/110_11_0_slugs_decentralized	slugs_decentralized	shields/momentum_shield	0.05
IndivQLearningParticleDNN/110_11_0	none		True	-10	True	ParticleMomentum	False	False	10	-30	Individual_Deep_Q	1.0	simple_mlp	False	0.05	2500000	0	True	IndivQLearningParticleDNN/110_11_0_none	none		0.05
IndivQLearningParticleDNN/111_11_1	none		True	-10	True	ParticleMomentum	False	False	10	-30	Individual_Deep_Q	1.0	simple_mlp	False	0.05	2500000	1	True	IndivQLearningParticleDNN/111_11_1_slugs_centralized	slugs_centralized	shields/momentum_shield	0.05
IndivQLearningParticleDNN/111_11_1	none		True	-10	True	ParticleMomentum	False	False	10	-30	Individual_Deep_Q	1.0	simple_mlp	False	0.05	2500000	1	True	IndivQLearningParticleDNN/111_11_1_slugs_decentralized	slugs_decentralized	shields/momentum_shield	0.05
IndivQLearningParticleDNN/111_11_1	none		True	-10	True	ParticleMomentum	False	False	10	-30	Individual_Deep_Q	1.0	simple_mlp	False	0.05	2500000	1	True	IndivQLearningParticleDNN/111_11_1_none	none		0.05
IndivQLearningParticleDNN/112_11_2	none		True	-10	True	ParticleMomentum	False	False	10	-30	Individual_Deep_Q	1.0	simple_mlp	False	0.05	2500000	2	True	IndivQLearningParticleDNN/112_11_2_slugs_centralized	slugs_centralized	shields/momentum_shield	0.05
IndivQLearningParticleDNN/112_11_2	none		True	-10	True	ParticleMomentum	False	False	10	-30	Individual_Deep_Q	1.0	simple_mlp	False	0.05	2500000	2	True	IndivQLearningParticleDNN/112_11_2_slugs_decentralized	slugs_decentralized	shields/momentum_shield	0.05
IndivQLearningParticleDNN/112_11_2	none		True	-10	True	ParticleMomentum	False	False	10	-30	Individual_Deep_Q	1.0	simple_mlp	False	0.05	2500000	2	True	IndivQLearningParticleDNN/112_11_2_none	none		0.05
IndivQLearningParticleDNN/113_11_3	none		True	-10	True	ParticleMomentum	False	False	10	-30	Individual_Deep_Q	1.0	simple_mlp	False	0.05	2500000	3	True	IndivQLearningParticleDNN/113_11_3_slugs_centralized	slugs_centralized	shields/momentum_shield	0.05
IndivQLearningParticleDNN/113_11_3	none		True	-10	True	ParticleMomentum	False	False	10	-30	Individual_Deep_Q	1.0	simple_mlp	False	0.05	2500000	3	True	IndivQLearningParticleDNN/113_11_3_slugs_decentralized	slugs_decentralized	shields/momentum_shield	0.05
IndivQLearningParticleDNN/113_11_3	none		True	-10	True	ParticleMomentum	False	False	10	-30	Individual_Deep_Q	1.0	simple_mlp	False	0.05	2500000	3	True	IndivQLearningParticleDNN/113_11_3_none	none		0.05
IndivQLearningParticleDNN/114_11_4	none		True	-10	True	ParticleMomentum	False	False	10	-30	Individual_Deep_Q	1.0	simple_mlp	False	0.05	2500000	4	True	IndivQLearningParticleDNN/114_11_4_slugs_centralized	slugs_centralized	shields/momentum_shield	0.05
IndivQLearningParticleDNN/114_11_4	none		True	-10	True	ParticleMomentum	False	False	10	-30	Individual_Deep_Q	1.0	simple_mlp	False	0.05	2500000	4	True	IndivQLearningParticleDNN/114_11_4_slugs_decentralized	slugs_decentralized	shields/momentum_shield	0.05
IndivQLearningParticleDNN/114_11_4	none		True	-10	True	ParticleMomentum	False	False	10	-30	Individual_Deep_Q	1.0	simple_mlp	False	0.05	2500000	4	True	IndivQLearningParticleDNN/114_11_4_none	none		0.05
IndivQLearningParticleDNN/115_11_5	none		True	-10	True	ParticleMomentum	False	False	10	-30	Individual_Deep_Q	1.0	simple_mlp	False	0.05	2500000	5	True	IndivQLearningParticleDNN/115_11_5_slugs_centralized	slugs_centralized	shields/momentum_shield	0.05
IndivQLearningParticleDNN/115_11_5	none		True	-10	True	ParticleMomentum	False	False	10	-30	Individual_Deep_Q	1.0	simple_mlp	False	0.05	2500000	5	True	IndivQLearningParticleDNN/115_11_5_slugs_decentralized	slugs_decentralized	shields/momentum_shield	0.05
IndivQLearningParticleDNN/115_11_5	none		True	-10	True	ParticleMomentum	False	False	10	-30	Individual_Deep_Q	1.0	simple_mlp	False	0.05	2500000	5	True	IndivQLearningParticleDNN/115_11_5_none	none		0.05
IndivQLearningParticleDNN/116_11_6	none		True	-10	True	ParticleMomentum	False	False	10	-30	Individual_Deep_Q	1.0	simple_mlp	False	0.05	2500000	6	True	IndivQLearningParticleDNN/116_11_6_slugs_centralized	slugs_centralized	shields/momentum_shield	0.05
IndivQLearningParticleDNN/116_11_6	none		True	-10	True	ParticleMomentum	False	False	10	-30	Individual_Deep_Q	1.0	simple_mlp	False	0.05	2500000	6	True	IndivQLearningParticleDNN/116_11_6_slugs_decentralized	slugs_decentralized	shields/momentum_shield	0.05
IndivQLearningParticleDNN/116_11_6	none		True	-10	True	ParticleMomentum	False	False	10	-30	Individual_Deep_Q	1.0	simple_mlp	False	0.05	2500000	6	True	IndivQLearningParticleDNN/116_11_6_none	none		0.05
IndivQLearningParticleDNN/117_11_7	none		True	-10	True	ParticleMomentum	False	False	10	-30	Individual_Deep_Q	1.0	simple_mlp	False	0.05	2500000	7	True	IndivQLearningParticleDNN/117_11_7_slugs_centralized	slugs_centralized	shields/momentum_shield	0.05
IndivQLearningParticleDNN/117_11_7	none		True	-10	True	ParticleMomentum	False	False	10	-30	Individual_Deep_Q	1.0	simple_mlp	False	0.05	2500000	7	True	IndivQLearningParticleDNN/117_11_7_slugs_decentralized	slugs_decentralized	shields/momentum_shield	0.05
IndivQLearningParticleDNN/117_11_7	none		True	-10	True	ParticleMomentum	False	False	10	-30	Individual_Deep_Q	1.0	simple_mlp	False	0.05	2500000	7	True	IndivQLearningParticleDNN/117_11_7_none	none		0.05
IndivQLearningParticleDNN/118_11_8	none		True	-10	True	ParticleMomentum	False	False	10	-30	Individual_Deep_Q	1.0	simple_mlp	False	0.05	2500000	8	True	IndivQLearningParticleDNN/118_11_8_slugs_centralized	slugs_centralized	shields/momentum_shield	0.05
IndivQLearningParticleDNN/118_11_8	none		True	-10	True	ParticleMomentum	False	False	10	-30	Individual_Deep_Q	1.0	simple_mlp	False	0.05	2500000	8	True	IndivQLearningParticleDNN/118_11_8_slugs_decentralized	slugs_decentralized	shields/momentum_shield	0.05
IndivQLearningParticleDNN/118_11_8	none		True	-10	True	ParticleMomentum	False	False	10	-30	Individual_Deep_Q	1.0	simple_mlp	False	0.05	2500000	8	True	IndivQLearningParticleDNN/118_11_8_none	none		0.05
IndivQLearningParticleDNN/119_11_9	none		True	-10	True	ParticleMomentum	False	False	10	-30	Individual_Deep_Q	1.0	simple_mlp	False	0.05	2500000	9	True	IndivQLearningParticleDNN/119_11_9_slugs_centralized	slugs_centralized	shields/momentum_shield	0.05
IndivQLearningParticleDNN/119_11_9	none		True	-10	True	ParticleMomentum	False	False	10	-30	Individual_Deep_Q	1.0	simple_mlp	False	0.05	2500000	9	True	IndivQLearningParticleDNN/119_11_9_slugs_decentralized	slugs_decentralized	shields/momentum_shield	0.05
IndivQLearningParticleDNN/119_11_9	none		True	-10	True	ParticleMomentum	False	False	10	-30	Individual_Deep_Q	1.0	simple_mlp	False	0.05	2500000	9	True	IndivQLearningParticleDNN/119_11_9_none	none		0.05
IndivQLearningParticleDNN/120_12_0	slugs_centralized	shields/momentum_shield	True	-10	False	ParticleMomentum	True	False	10	-30	Individual_Deep_Q	1.0	simple_mlp	True	0.05	2500000	0	True	IndivQLearningParticleDNN/120_12_0_slugs_centralized	slugs_centralized	shields/momentum_shield	0.05
IndivQLearningParticleDNN/120_12_0	slugs_centralized	shields/momentum_shield	True	-10	False	ParticleMomentum	True	False	10	-30	Individual_Deep_Q	1.0	simple_mlp	True	0.05	2500000	0	True	IndivQLearningParticleDNN/120_12_0_slugs_decentralized	slugs_decentralized	shields/momentum_shield	0.05
IndivQLearningParticleDNN/120_12_0	slugs_centralized	shields/momentum_shield	True	-10	False	ParticleMomentum	True	False	10	-30	Individual_Deep_Q	1.0	simple_mlp	True	0.05	2500000	0	True	IndivQLearningParticleDNN/120_12_0_none	none		0.05
IndivQLearningParticleDNN/121_12_1	slugs_centralized	shields/momentum_shield	True	-10	False	ParticleMomentum	True	False	10	-30	Individual_Deep_Q	1.0	simple_mlp	True	0.05	2500000	1	True	IndivQLearningParticleDNN/121_12_1_slugs_centralized	slugs_centralized	shields/momentum_shield	0.05
IndivQLearningParticleDNN/121_12_1	slugs_centralized	shields/momentum_shield	True	-10	False	ParticleMomentum	True	False	10	-30	Individual_Deep_Q	1.0	simple_mlp	True	0.05	2500000	1	True	IndivQLearningParticleDNN/121_12_1_slugs_decentralized	slugs_decentralized	shields/momentum_shield	0.05
IndivQLearningParticleDNN/121_12_1	slugs_centralized	shields/momentum_shield	True	-10	False	ParticleMomentum	True	False	10	-30	Individual_Deep_Q	1.0	simple_mlp	True	0.05	2500000	1	True	IndivQLearningParticleDNN/121_12_1_none	none		0.05
IndivQLearningParticleDNN/122_12_2	slugs_centralized	shields/momentum_shield	True	-10	False	ParticleMomentum	True	False	10	-30	Individual_Deep_Q	1.0	simple_mlp	True	0.05	2500000	2	True	IndivQLearningParticleDNN/122_12_2_slugs_centralized	slugs_centralized	shields/momentum_shield	0.05
IndivQLearningParticleDNN/122_12_2	slugs_centralized	shields/momentum_shield	True	-10	False	ParticleMomentum	True	False	10	-30	Individual_Deep_Q	1.0	simple_mlp	True	0.05	2500000	2	True	IndivQLearningParticleDNN/122_12_2_slugs_decentralized	slugs_decentralized	shields/momentum_shield	0.05
IndivQLearningParticleDNN/122_12_2	slugs_centralized	shields/momentum_shield	True	-10	False	ParticleMomentum	True	False	10	-30	Individual_Deep_Q	1.0	simple_mlp	True	0.05	2500000	2	True	IndivQLearningParticleDNN/122_12_2_none	none		0.05
IndivQLearningParticleDNN/123_12_3	slugs_centralized	shields/momentum_shield	True	-10	False	ParticleMomentum	True	False	10	-30	Individual_Deep_Q	1.0	simple_mlp	True	0.05	2500000	3	True	IndivQLearningParticleDNN/123_12_3_slugs_centralized	slugs_centralized	shields/momentum_shield	0.05
IndivQLearningParticleDNN/123_12_3	slugs_centralized	shields/momentum_shield	True	-10	False	ParticleMomentum	True	False	10	-30	Individual_Deep_Q	1.0	simple_mlp	True	0.05	2500000	3	True	IndivQLearningParticleDNN/123_12_3_slugs_decentralized	slugs_decentralized	shields/momentum_shield	0.05
IndivQLearningParticleDNN/123_12_3	slugs_centralized	shields/momentum_shield	True	-10	False	ParticleMomentum	True	False	10	-30	Individual_Deep_Q	1.0	simple_mlp	True	0.05	2500000	3	True	IndivQLearningParticleDNN/123_12_3_none	none		0.05
IndivQLearningParticleDNN/124_12_4	slugs_centralized	shields/momentum_shield	True	-10	False	ParticleMomentum	True	False	10	-30	Individual_Deep_Q	1.0	simple_mlp	True	0.05	2500000	4	True	IndivQLearningParticleDNN/124_12_4_slugs_centralized	slugs_centralized	shields/momentum_shield	0.05
IndivQLearningParticleDNN/124_12_4	slugs_centralized	shields/momentum_shield	True	-10	False	ParticleMomentum	True	False	10	-30	Individual_Deep_Q	1.0	simple_mlp	True	0.05	2500000	4	True	IndivQLearningParticleDNN/124_12_4_slugs_decentralized	slugs_decentralized	shields/momentum_shield	0.05
IndivQLearningParticleDNN/124_12_4	slugs_centralized	shields/momentum_shield	True	-10	False	ParticleMomentum	True	False	10	-30	Individual_Deep_Q	1.0	simple_mlp	True	0.05	2500000	4	True	IndivQLearningParticleDNN/124_12_4_none	none		0.05
IndivQLearningParticleDNN/125_12_5	slugs_centralized	shields/momentum_shield	True	-10	False	ParticleMomentum	True	False	10	-30	Individual_Deep_Q	1.0	simple_mlp	True	0.05	2500000	5	True	IndivQLearningParticleDNN/125_12_5_slugs_centralized	slugs_centralized	shields/momentum_shield	0.05
IndivQLearningParticleDNN/125_12_5	slugs_centralized	shields/momentum_shield	True	-10	False	ParticleMomentum	True	False	10	-30	Individual_Deep_Q	1.0	simple_mlp	True	0.05	2500000	5	True	IndivQLearningParticleDNN/125_12_5_slugs_decentralized	slugs_decentralized	shields/momentum_shield	0.05
IndivQLearningParticleDNN/125_12_5	slugs_centralized	shields/momentum_shield	True	-10	False	ParticleMomentum	True	False	10	-30	Individual_Deep_Q	1.0	simple_mlp	True	0.05	2500000	5	True	IndivQLearningParticleDNN/125_12_5_none	none		0.05
IndivQLearningParticleDNN/126_12_6	slugs_centralized	shields/momentum_shield	True	-10	False	ParticleMomentum	True	False	10	-30	Individual_Deep_Q	1.0	simple_mlp	True	0.05	2500000	6	True	IndivQLearningParticleDNN/126_12_6_slugs_centralized	slugs_centralized	shields/momentum_shield	0.05
IndivQLearningParticleDNN/126_12_6	slugs_centralized	shields/momentum_shield	True	-10	False	ParticleMomentum	True	False	10	-30	Individual_Deep_Q	1.0	simple_mlp	True	0.05	2500000	6	True	IndivQLearningParticleDNN/126_12_6_slugs_decentralized	slugs_decentralized	shields/momentum_shield	0.05
IndivQLearningParticleDNN/126_12_6	slugs_centralized	shields/momentum_shield	True	-10	False	ParticleMomentum	True	False	10	-30	Individual_Deep_Q	1.0	simple_mlp	True	0.05	2500000	6	True	IndivQLearningParticleDNN/126_12_6_none	none		0.05
IndivQLearningParticleDNN/127_12_7	slugs_centralized	shields/momentum_shield	True	-10	False	ParticleMomentum	True	False	10	-30	Individual_Deep_Q	1.0	simple_mlp	True	0.05	2500000	7	True	IndivQLearningParticleDNN/127_12_7_slugs_centralized	slugs_centralized	shields/momentum_shield	0.05
IndivQLearningParticleDNN/127_12_7	slugs_centralized	shields/momentum_shield	True	-10	False	ParticleMomentum	True	False	10	-30	Individual_Deep_Q	1.0	simple_mlp	True	0.05	2500000	7	True	IndivQLearningParticleDNN/127_12_7_slugs_decentralized	slugs_decentralized	shields/momentum_shield	0.05
IndivQLearningParticleDNN/127_12_7	slugs_centralized	shields/momentum_shield	True	-10	False	ParticleMomentum	True	False	10	-30	Individual_Deep_Q	1.0	simple_mlp	True	0.05	2500000	7	True	IndivQLearningParticleDNN/127_12_7_none	none		0.05
IndivQLearningParticleDNN/128_12_8	slugs_centralized	shields/momentum_shield	True	-10	False	ParticleMomentum	True	False	10	-30	Individual_Deep_Q	1.0	simple_mlp	True	0.05	2500000	8	True	IndivQLearningParticleDNN/128_12_8_slugs_centralized	slugs_centralized	shields/momentum_shield	0.05
IndivQLearningParticleDNN/128_12_8	slugs_centralized	shields/momentum_shield	True	-10	False	ParticleMomentum	True	False	10	-30	Individual_Deep_Q	1.0	simple_mlp	True	0.05	2500000	8	True	IndivQLearningParticleDNN/128_12_8_slugs_decentralized	slugs_decentralized	shields/momentum_shield	0.05
IndivQLearningParticleDNN/128_12_8	slugs_centralized	shields/momentum_shield	True	-10	False	ParticleMomentum	True	False	10	-30	Individual_Deep_Q	1.0	simple_mlp	True	0.05	2500000	8	True	IndivQLearningParticleDNN/128_12_8_none	none		0.05
IndivQLearningParticleDNN/129_12_9	slugs_centralized	shields/momentum_shield	True	-10	False	ParticleMomentum	True	False	10	-30	Individual_Deep_Q	1.0	simple_mlp	True	0.05	2500000	9	True	IndivQLearningParticleDNN/129_12_9_slugs_centralized	slugs_centralized	shields/momentum_shield	0.05
IndivQLearningParticleDNN/129_12_9	slugs_centralized	shields/momentum_shield	True	-10	False	ParticleMomentum	True	False	10	-30	Individual_Deep_Q	1.0	simple_mlp	True	0.05	2500000	9	True	IndivQLearningParticleDNN/129_12_9_slugs_decentralized	slugs_decentralized	shields/momentum_shield	0.05
IndivQLearningParticleDNN/129_12_9	slugs_centralized	shields/momentum_shield	True	-10	False	ParticleMomentum	True	False	10	-30	Individual_Deep_Q	1.0	simple_mlp	True	0.05	2500000	9	True	IndivQLearningParticleDNN/129_12_9_none	none		0.05
IndivQLearningParticleDNN/130_13_0	slugs_centralized	shields/momentum_shield	True	-10	False	ParticleMomentum	True	False	10	-30	Individual_Deep_Q	1.0	simple_mlp	False	0.05	2500000	0	True	IndivQLearningParticleDNN/130_13_0_slugs_centralized	slugs_centralized	shields/momentum_shield	0.05
IndivQLearningParticleDNN/130_13_0	slugs_centralized	shields/momentum_shield	True	-10	False	ParticleMomentum	True	False	10	-30	Individual_Deep_Q	1.0	simple_mlp	False	0.05	2500000	0	True	IndivQLearningParticleDNN/130_13_0_slugs_decentralized	slugs_decentralized	shields/momentum_shield	0.05
IndivQLearningParticleDNN/130_13_0	slugs_centralized	shields/momentum_shield	True	-10	False	ParticleMomentum	True	False	10	-30	Individual_Deep_Q	1.0	simple_mlp	False	0.05	2500000	0	True	IndivQLearningParticleDNN/130_13_0_none	none		0.05
IndivQLearningParticleDNN/131_13_1	slugs_centralized	shields/momentum_shield	True	-10	False	ParticleMomentum	True	False	10	-30	Individual_Deep_Q	1.0	simple_mlp	False	0.05	2500000	1	True	IndivQLearningParticleDNN/131_13_1_slugs_centralized	slugs_centralized	shields/momentum_shield	0.05
IndivQLearningParticleDNN/131_13_1	slugs_centralized	shields/momentum_shield	True	-10	False	ParticleMomentum	True	False	10	-30	Individual_Deep_Q	1.0	simple_mlp	False	0.05	2500000	1	True	IndivQLearningParticleDNN/131_13_1_slugs_decentralized	slugs_decentralized	shields/momentum_shield	0.05
IndivQLearningParticleDNN/131_13_1	slugs_centralized	shields/momentum_shield	True	-10	False	ParticleMomentum	True	False	10	-30	Individual_Deep_Q	1.0	simple_mlp	False	0.05	2500000	1	True	IndivQLearningParticleDNN/131_13_1_none	none		0.05
IndivQLearningParticleDNN/132_13_2	slugs_centralized	shields/momentum_shield	True	-10	False	ParticleMomentum	True	False	10	-30	Individual_Deep_Q	1.0	simple_mlp	False	0.05	2500000	2	True	IndivQLearningParticleDNN/132_13_2_slugs_centralized	slugs_centralized	shields/momentum_shield	0.05
IndivQLearningParticleDNN/132_13_2	slugs_centralized	shields/momentum_shield	True	-10	False	ParticleMomentum	True	False	10	-30	Individual_Deep_Q	1.0	simple_mlp	False	0.05	2500000	2	True	IndivQLearningParticleDNN/132_13_2_slugs_decentralized	slugs_decentralized	shields/momentum_shield	0.05
IndivQLearningParticleDNN/132_13_2	slugs_centralized	shields/momentum_shield	True	-10	False	ParticleMomentum	True	False	10	-30	Individual_Deep_Q	1.0	simple_mlp	False	0.05	2500000	2	True	IndivQLearningParticleDNN/132_13_2_none	none		0.05
IndivQLearningParticleDNN/133_13_3	slugs_centralized	shields/momentum_shield	True	-10	False	ParticleMomentum	True	False	10	-30	Individual_Deep_Q	1.0	simple_mlp	False	0.05	2500000	3	True	IndivQLearningParticleDNN/133_13_3_slugs_centralized	slugs_centralized	shields/momentum_shield	0.05
IndivQLearningParticleDNN/133_13_3	slugs_centralized	shields/momentum_shield	True	-10	False	ParticleMomentum	True	False	10	-30	Individual_Deep_Q	1.0	simple_mlp	False	0.05	2500000	3	True	IndivQLearningParticleDNN/133_13_3_slugs_decentralized	slugs_decentralized	shields/momentum_shield	0.05
IndivQLearningParticleDNN/133_13_3	slugs_centralized	shields/momentum_shield	True	-10	False	ParticleMomentum	True	False	10	-30	Individual_Deep_Q	1.0	simple_mlp	False	0.05	2500000	3	True	IndivQLearningParticleDNN/133_13_3_none	none		0.05
IndivQLearningParticleDNN/134_13_4	slugs_centralized	shields/momentum_shield	True	-10	False	ParticleMomentum	True	False	10	-30	Individual_Deep_Q	1.0	simple_mlp	False	0.05	2500000	4	True	IndivQLearningParticleDNN/134_13_4_slugs_centralized	slugs_centralized	shields/momentum_shield	0.05
IndivQLearningParticleDNN/134_13_4	slugs_centralized	shields/momentum_shield	True	-10	False	ParticleMomentum	True	False	10	-30	Individual_Deep_Q	1.0	simple_mlp	False	0.05	2500000	4	True	IndivQLearningParticleDNN/134_13_4_slugs_decentralized	slugs_decentralized	shields/momentum_shield	0.05
IndivQLearningParticleDNN/134_13_4	slugs_centralized	shields/momentum_shield	True	-10	False	ParticleMomentum	True	False	10	-30	Individual_Deep_Q	1.0	simple_mlp	False	0.05	2500000	4	True	IndivQLearningParticleDNN/134_13_4_none	none		0.05
IndivQLearningParticleDNN/135_13_5	slugs_centralized	shields/momentum_shield	True	-10	False	ParticleMomentum	True	False	10	-30	Individual_Deep_Q	1.0	simple_mlp	False	0.05	2500000	5	True	IndivQLearningParticleDNN/135_13_5_slugs_centralized	slugs_centralized	shields/momentum_shield	0.05
IndivQLearningParticleDNN/135_13_5	slugs_centralized	shields/momentum_shield	True	-10	False	ParticleMomentum	True	False	10	-30	Individual_Deep_Q	1.0	simple_mlp	False	0.05	2500000	5	True	IndivQLearningParticleDNN/135_13_5_slugs_decentralized	slugs_decentralized	shields/momentum_shield	0.05
IndivQLearningParticleDNN/135_13_5	slugs_centralized	shields/momentum_shield	True	-10	False	ParticleMomentum	True	False	10	-30	Individual_Deep_Q	1.0	simple_mlp	False	0.05	2500000	5	True	IndivQLearningParticleDNN/135_13_5_none	none		0.05
IndivQLearningParticleDNN/136_13_6	slugs_centralized	shields/momentum_shield	True	-10	False	ParticleMomentum	True	False	10	-30	Individual_Deep_Q	1.0	simple_mlp	False	0.05	2500000	6	True	IndivQLearningParticleDNN/136_13_6_slugs_centralized	slugs_centralized	shields/momentum_shield	0.05
IndivQLearningParticleDNN/136_13_6	slugs_centralized	shields/momentum_shield	True	-10	False	ParticleMomentum	True	False	10	-30	Individual_Deep_Q	1.0	simple_mlp	False	0.05	2500000	6	True	IndivQLearningParticleDNN/136_13_6_slugs_decentralized	slugs_decentralized	shields/momentum_shield	0.05
IndivQLearningParticleDNN/136_13_6	slugs_centralized	shields/momentum_shield	True	-10	False	ParticleMomentum	True	False	10	-30	Individual_Deep_Q	1.0	simple_mlp	False	0.05	2500000	6	True	IndivQLearningParticleDNN/136_13_6_none	none		0.05
IndivQLearningParticleDNN/137_13_7	slugs_centralized	shields/momentum_shield	True	-10	False	ParticleMomentum	True	False	10	-30	Individual_Deep_Q	1.0	simple_mlp	False	0.05	2500000	7	True	IndivQLearningParticleDNN/137_13_7_slugs_centralized	slugs_centralized	shields/momentum_shield	0.05
IndivQLearningParticleDNN/137_13_7	slugs_centralized	shields/momentum_shield	True	-10	False	ParticleMomentum	True	False	10	-30	Individual_Deep_Q	1.0	simple_mlp	False	0.05	2500000	7	True	IndivQLearningParticleDNN/137_13_7_slugs_decentralized	slugs_decentralized	shields/momentum_shield	0.05
IndivQLearningParticleDNN/137_13_7	slugs_centralized	shields/momentum_shield	True	-10	False	ParticleMomentum	True	False	10	-30	Individual_Deep_Q	1.0	simple_mlp	False	0.05	2500000	7	True	IndivQLearningParticleDNN/137_13_7_none	none		0.05
IndivQLearningParticleDNN/138_13_8	slugs_centralized	shields/momentum_shield	True	-10	False	ParticleMomentum	True	False	10	-30	Individual_Deep_Q	1.0	simple_mlp	False	0.05	2500000	8	True	IndivQLearningParticleDNN/138_13_8_slugs_centralized	slugs_centralized	shields/momentum_shield	0.05
IndivQLearningParticleDNN/138_13_8	slugs_centralized	shields/momentum_shield	True	-10	False	ParticleMomentum	True	False	10	-30	Individual_Deep_Q	1.0	simple_mlp	False	0.05	2500000	8	True	IndivQLearningParticleDNN/138_13_8_slugs_decentralized	slugs_decentralized	shields/momentum_shield	0.05
IndivQLearningParticleDNN/138_13_8	slugs_centralized	shields/momentum_shield	True	-10	False	ParticleMomentum	True	False	10	-30	Individual_Deep_Q	1.0	simple_mlp	False	0.05	2500000	8	True	IndivQLearningParticleDNN/138_13_8_none	none		0.05
IndivQLearningParticleDNN/139_13_9	slugs_centralized	shields/momentum_shield	True	-10	False	ParticleMomentum	True	False	10	-30	Individual_Deep_Q	1.0	simple_mlp	False	0.05	2500000	9	True	IndivQLearningParticleDNN/139_13_9_slugs_centralized	slugs_centralized	shields/momentum_shield	0.05
IndivQLearningParticleDNN/139_13_9	slugs_centralized	shields/momentum_shield	True	-10	False	ParticleMomentum	True	False	10	-30	Individual_Deep_Q	1.0	simple_mlp	False	0.05	2500000	9	True	IndivQLearningParticleDNN/139_13_9_slugs_decentralized	slugs_decentralized	shields/momentum_shield	0.05
IndivQLearningParticleDNN/139_13_9	slugs_centralized	shields/momentum_shield	True	-10	False	ParticleMomentum	True	False	10	-30	Individual_Deep_Q	1.0	simple_mlp	False	0.05	2500000	9	True	IndivQLearningParticleDNN/139_13_9_none	none		0.05
IndivQLearningParticleDNN/140_14_0	slugs_centralized	shields/momentum_shield	True	-10	False	ParticleMomentum	False	False	10	-30	Individual_Deep_Q	1.0	simple_mlp	True	0.05	2500000	0	True	IndivQLearningParticleDNN/140_14_0_slugs_centralized	slugs_centralized	shields/momentum_shield	0.05
IndivQLearningParticleDNN/140_14_0	slugs_centralized	shields/momentum_shield	True	-10	False	ParticleMomentum	False	False	10	-30	Individual_Deep_Q	1.0	simple_mlp	True	0.05	2500000	0	True	IndivQLearningParticleDNN/140_14_0_slugs_decentralized	slugs_decentralized	shields/momentum_shield	0.05
IndivQLearningParticleDNN/140_14_0	slugs_centralized	shields/momentum_shield	True	-10	False	ParticleMomentum	False	False	10	-30	Individual_Deep_Q	1.0	simple_mlp	True	0.05	2500000	0	True	IndivQLearningParticleDNN/140_14_0_none	none		0.05
IndivQLearningParticleDNN/141_14_1	slugs_centralized	shields/momentum_shield	True	-10	False	ParticleMomentum	False	False	10	-30	Individual_Deep_Q	1.0	simple_mlp	True	0.05	2500000	1	True	IndivQLearningParticleDNN/141_14_1_slugs_centralized	slugs_centralized	shields/momentum_shield	0.05
IndivQLearningParticleDNN/141_14_1	slugs_centralized	shields/momentum_shield	True	-10	False	ParticleMomentum	False	False	10	-30	Individual_Deep_Q	1.0	simple_mlp	True	0.05	2500000	1	True	IndivQLearningParticleDNN/141_14_1_slugs_decentralized	slugs_decentralized	shields/momentum_shield	0.05
IndivQLearningParticleDNN/141_14_1	slugs_centralized	shields/momentum_shield	True	-10	False	ParticleMomentum	False	False	10	-30	Individual_Deep_Q	1.0	simple_mlp	True	0.05	2500000	1	True	IndivQLearningParticleDNN/141_14_1_none	none		0.05
IndivQLearningParticleDNN/142_14_2	slugs_centralized	shields/momentum_shield	True	-10	False	ParticleMomentum	False	False	10	-30	Individual_Deep_Q	1.0	simple_mlp	True	0.05	2500000	2	True	IndivQLearningParticleDNN/142_14_2_slugs_centralized	slugs_centralized	shields/momentum_shield	0.05
IndivQLearningParticleDNN/142_14_2	slugs_centralized	shields/momentum_shield	True	-10	False	ParticleMomentum	False	False	10	-30	Individual_Deep_Q	1.0	simple_mlp	True	0.05	2500000	2	True	IndivQLearningParticleDNN/142_14_2_slugs_decentralized	slugs_decentralized	shields/momentum_shield	0.05
IndivQLearningParticleDNN/142_14_2	slugs_centralized	shields/momentum_shield	True	-10	False	ParticleMomentum	False	False	10	-30	Individual_Deep_Q	1.0	simple_mlp	True	0.05	2500000	2	True	IndivQLearningParticleDNN/142_14_2_none	none		0.05
IndivQLearningParticleDNN/143_14_3	slugs_centralized	shields/momentum_shield	True	-10	False	ParticleMomentum	False	False	10	-30	Individual_Deep_Q	1.0	simple_mlp	True	0.05	2500000	3	True	IndivQLearningParticleDNN/143_14_3_slugs_centralized	slugs_centralized	shields/momentum_shield	0.05
IndivQLearningParticleDNN/143_14_3	slugs_centralized	shields/momentum_shield	True	-10	False	ParticleMomentum	False	False	10	-30	Individual_Deep_Q	1.0	simple_mlp	True	0.05	2500000	3	True	IndivQLearningParticleDNN/143_14_3_slugs_decentralized	slugs_decentralized	shields/momentum_shield	0.05
IndivQLearningParticleDNN/143_14_3	slugs_centralized	shields/momentum_shield	True	-10	False	ParticleMomentum	False	False	10	-30	Individual_Deep_Q	1.0	simple_mlp	True	0.05	2500000	3	True	IndivQLearningParticleDNN/143_14_3_none	none		0.05
IndivQLearningParticleDNN/144_14_4	slugs_centralized	shields/momentum_shield	True	-10	False	ParticleMomentum	False	False	10	-30	Individual_Deep_Q	1.0	simple_mlp	True	0.05	2500000	4	True	IndivQLearningParticleDNN/144_14_4_slugs_centralized	slugs_centralized	shields/momentum_shield	0.05
IndivQLearningParticleDNN/144_14_4	slugs_centralized	shields/momentum_shield	True	-10	False	ParticleMomentum	False	False	10	-30	Individual_Deep_Q	1.0	simple_mlp	True	0.05	2500000	4	True	IndivQLearningParticleDNN/144_14_4_slugs_decentralized	slugs_decentralized	shields/momentum_shield	0.05
IndivQLearningParticleDNN/144_14_4	slugs_centralized	shields/momentum_shield	True	-10	False	ParticleMomentum	False	False	10	-30	Individual_Deep_Q	1.0	simple_mlp	True	0.05	2500000	4	True	IndivQLearningParticleDNN/144_14_4_none	none		0.05
IndivQLearningParticleDNN/145_14_5	slugs_centralized	shields/momentum_shield	True	-10	False	ParticleMomentum	False	False	10	-30	Individual_Deep_Q	1.0	simple_mlp	True	0.05	2500000	5	True	IndivQLearningParticleDNN/145_14_5_slugs_centralized	slugs_centralized	shields/momentum_shield	0.05
IndivQLearningParticleDNN/145_14_5	slugs_centralized	shields/momentum_shield	True	-10	False	ParticleMomentum	False	False	10	-30	Individual_Deep_Q	1.0	simple_mlp	True	0.05	2500000	5	True	IndivQLearningParticleDNN/145_14_5_slugs_decentralized	slugs_decentralized	shields/momentum_shield	0.05
IndivQLearningParticleDNN/145_14_5	slugs_centralized	shields/momentum_shield	True	-10	False	ParticleMomentum	False	False	10	-30	Individual_Deep_Q	1.0	simple_mlp	True	0.05	2500000	5	True	IndivQLearningParticleDNN/145_14_5_none	none		0.05
IndivQLearningParticleDNN/146_14_6	slugs_centralized	shields/momentum_shield	True	-10	False	ParticleMomentum	False	False	10	-30	Individual_Deep_Q	1.0	simple_mlp	True	0.05	2500000	6	True	IndivQLearningParticleDNN/146_14_6_slugs_centralized	slugs_centralized	shields/momentum_shield	0.05
IndivQLearningParticleDNN/146_14_6	slugs_centralized	shields/momentum_shield	True	-10	False	ParticleMomentum	False	False	10	-30	Individual_Deep_Q	1.0	simple_mlp	True	0.05	2500000	6	True	IndivQLearningParticleDNN/146_14_6_slugs_decentralized	slugs_decentralized	shields/momentum_shield	0.05
IndivQLearningParticleDNN/146_14_6	slugs_centralized	shields/momentum_shield	True	-10	False	ParticleMomentum	False	False	10	-30	Individual_Deep_Q	1.0	simple_mlp	True	0.05	2500000	6	True	IndivQLearningParticleDNN/146_14_6_none	none		0.05
IndivQLearningParticleDNN/147_14_7	slugs_centralized	shields/momentum_shield	True	-10	False	ParticleMomentum	False	False	10	-30	Individual_Deep_Q	1.0	simple_mlp	True	0.05	2500000	7	True	IndivQLearningParticleDNN/147_14_7_slugs_centralized	slugs_centralized	shields/momentum_shield	0.05
IndivQLearningParticleDNN/147_14_7	slugs_centralized	shields/momentum_shield	True	-10	False	ParticleMomentum	False	False	10	-30	Individual_Deep_Q	1.0	simple_mlp	True	0.05	2500000	7	True	IndivQLearningParticleDNN/147_14_7_slugs_decentralized	slugs_decentralized	shields/momentum_shield	0.05
IndivQLearningParticleDNN/147_14_7	slugs_centralized	shields/momentum_shield	True	-10	False	ParticleMomentum	False	False	10	-30	Individual_Deep_Q	1.0	simple_mlp	True	0.05	2500000	7	True	IndivQLearningParticleDNN/147_14_7_none	none		0.05
IndivQLearningParticleDNN/148_14_8	slugs_centralized	shields/momentum_shield	True	-10	False	ParticleMomentum	False	False	10	-30	Individual_Deep_Q	1.0	simple_mlp	True	0.05	2500000	8	True	IndivQLearningParticleDNN/148_14_8_slugs_centralized	slugs_centralized	shields/momentum_shield	0.05
IndivQLearningParticleDNN/148_14_8	slugs_centralized	shields/momentum_shield	True	-10	False	ParticleMomentum	False	False	10	-30	Individual_Deep_Q	1.0	simple_mlp	True	0.05	2500000	8	True	IndivQLearningParticleDNN/148_14_8_slugs_decentralized	slugs_decentralized	shields/momentum_shield	0.05
IndivQLearningParticleDNN/148_14_8	slugs_centralized	shields/momentum_shield	True	-10	False	ParticleMomentum	False	False	10	-30	Individual_Deep_Q	1.0	simple_mlp	True	0.05	2500000	8	True	IndivQLearningParticleDNN/148_14_8_none	none		0.05
IndivQLearningParticleDNN/149_14_9	slugs_centralized	shields/momentum_shield	True	-10	False	ParticleMomentum	False	False	10	-30	Individual_Deep_Q	1.0	simple_mlp	True	0.05	2500000	9	True	IndivQLearningParticleDNN/149_14_9_slugs_centralized	slugs_centralized	shields/momentum_shield	0.05
IndivQLearningParticleDNN/149_14_9	slugs_centralized	shields/momentum_shield	True	-10	False	ParticleMomentum	False	False	10	-30	Individual_Deep_Q	1.0	simple_mlp	True	0.05	2500000	9	True	IndivQLearningParticleDNN/149_14_9_slugs_decentralized	slugs_decentralized	shields/momentum_shield	0.05
IndivQLearningParticleDNN/149_14_9	slugs_centralized	shields/momentum_shield	True	-10	False	ParticleMomentum	False	False	10	-30	Individual_Deep_Q	1.0	simple_mlp	True	0.05	2500000	9	True	IndivQLearningParticleDNN/149_14_9_none	none		0.05
IndivQLearningParticleDNN/150_15_0	slugs_centralized	shields/momentum_shield	True	-10	False	ParticleMomentum	False	False	10	-30	Individual_Deep_Q	1.0	simple_mlp	False	0.05	2500000	0	True	IndivQLearningParticleDNN/150_15_0_slugs_centralized	slugs_centralized	shields/momentum_shield	0.05
IndivQLearningParticleDNN/150_15_0	slugs_centralized	shields/momentum_shield	True	-10	False	ParticleMomentum	False	False	10	-30	Individual_Deep_Q	1.0	simple_mlp	False	0.05	2500000	0	True	IndivQLearningParticleDNN/150_15_0_slugs_decentralized	slugs_decentralized	shields/momentum_shield	0.05
IndivQLearningParticleDNN/150_15_0	slugs_centralized	shields/momentum_shield	True	-10	False	ParticleMomentum	False	False	10	-30	Individual_Deep_Q	1.0	simple_mlp	False	0.05	2500000	0	True	IndivQLearningParticleDNN/150_15_0_none	none		0.05
IndivQLearningParticleDNN/151_15_1	slugs_centralized	shields/momentum_shield	True	-10	False	ParticleMomentum	False	False	10	-30	Individual_Deep_Q	1.0	simple_mlp	False	0.05	2500000	1	True	IndivQLearningParticleDNN/151_15_1_slugs_centralized	slugs_centralized	shields/momentum_shield	0.05
IndivQLearningParticleDNN/151_15_1	slugs_centralized	shields/momentum_shield	True	-10	False	ParticleMomentum	False	False	10	-30	Individual_Deep_Q	1.0	simple_mlp	False	0.05	2500000	1	True	IndivQLearningParticleDNN/151_15_1_slugs_decentralized	slugs_decentralized	shields/momentum_shield	0.05
IndivQLearningParticleDNN/151_15_1	slugs_centralized	shields/momentum_shield	True	-10	False	ParticleMomentum	False	False	10	-30	Individual_Deep_Q	1.0	simple_mlp	False	0.05	2500000	1	True	IndivQLearningParticleDNN/151_15_1_none	none		0.05
IndivQLearningParticleDNN/152_15_2	slugs_centralized	shields/momentum_shield	True	-10	False	ParticleMomentum	False	False	10	-30	Individual_Deep_Q	1.0	simple_mlp	False	0.05	2500000	2	True	IndivQLearningParticleDNN/152_15_2_slugs_centralized	slugs_centralized	shields/momentum_shield	0.05
IndivQLearningParticleDNN/152_15_2	slugs_centralized	shields/momentum_shield	True	-10	False	ParticleMomentum	False	False	10	-30	Individual_Deep_Q	1.0	simple_mlp	False	0.05	2500000	2	True	IndivQLearningParticleDNN/152_15_2_slugs_decentralized	slugs_decentralized	shields/momentum_shield	0.05
IndivQLearningParticleDNN/152_15_2	slugs_centralized	shields/momentum_shield	True	-10	False	ParticleMomentum	False	False	10	-30	Individual_Deep_Q	1.0	simple_mlp	False	0.05	2500000	2	True	IndivQLearningParticleDNN/152_15_2_none	none		0.05
IndivQLearningParticleDNN/153_15_3	slugs_centralized	shields/momentum_shield	True	-10	False	ParticleMomentum	False	False	10	-30	Individual_Deep_Q	1.0	simple_mlp	False	0.05	2500000	3	True	IndivQLearningParticleDNN/153_15_3_slugs_centralized	slugs_centralized	shields/momentum_shield	0.05
IndivQLearningParticleDNN/153_15_3	slugs_centralized	shields/momentum_shield	True	-10	False	ParticleMomentum	False	False	10	-30	Individual_Deep_Q	1.0	simple_mlp	False	0.05	2500000	3	True	IndivQLearningParticleDNN/153_15_3_slugs_decentralized	slugs_decentralized	shields/momentum_shield	0.05
IndivQLearningParticleDNN/153_15_3	slugs_centralized	shields/momentum_shield	True	-10	False	ParticleMomentum	False	False	10	-30	Individual_Deep_Q	1.0	simple_mlp	False	0.05	2500000	3	True	IndivQLearningParticleDNN/153_15_3_none	none		0.05
IndivQLearningParticleDNN/154_15_4	slugs_centralized	shields/momentum_shield	True	-10	False	ParticleMomentum	False	False	10	-30	Individual_Deep_Q	1.0	simple_mlp	False	0.05	2500000	4	True	IndivQLearningParticleDNN/154_15_4_slugs_centralized	slugs_centralized	shields/momentum_shield	0.05
IndivQLearningParticleDNN/154_15_4	slugs_centralized	shields/momentum_shield	True	-10	False	ParticleMomentum	False	False	10	-30	Individual_Deep_Q	1.0	simple_mlp	False	0.05	2500000	4	True	IndivQLearningParticleDNN/154_15_4_slugs_decentralized	slugs_decentralized	shields/momentum_shield	0.05
IndivQLearningParticleDNN/154_15_4	slugs_centralized	shields/momentum_shield	True	-10	False	ParticleMomentum	False	False	10	-30	Individual_Deep_Q	1.0	simple_mlp	False	0.05	2500000	4	True	IndivQLearningParticleDNN/154_15_4_none	none		0.05
IndivQLearningParticleDNN/155_15_5	slugs_centralized	shields/momentum_shield	True	-10	False	ParticleMomentum	False	False	10	-30	Individual_Deep_Q	1.0	simple_mlp	False	0.05	2500000	5	True	IndivQLearningParticleDNN/155_15_5_slugs_centralized	slugs_centralized	shields/momentum_shield	0.05
IndivQLearningParticleDNN/155_15_5	slugs_centralized	shields/momentum_shield	True	-10	False	ParticleMomentum	False	False	10	-30	Individual_Deep_Q	1.0	simple_mlp	False	0.05	2500000	5	True	IndivQLearningParticleDNN/155_15_5_slugs_decentralized	slugs_decentralized	shields/momentum_shield	0.05
IndivQLearningParticleDNN/155_15_5	slugs_centralized	shields/momentum_shield	True	-10	False	ParticleMomentum	False	False	10	-30	Individual_Deep_Q	1.0	simple_mlp	False	0.05	2500000	5	True	IndivQLearningParticleDNN/155_15_5_none	none		0.05
IndivQLearningParticleDNN/156_15_6	slugs_centralized	shields/momentum_shield	True	-10	False	ParticleMomentum	False	False	10	-30	Individual_Deep_Q	1.0	simple_mlp	False	0.05	2500000	6	True	IndivQLearningParticleDNN/156_15_6_slugs_centralized	slugs_centralized	shields/momentum_shield	0.05
IndivQLearningParticleDNN/156_15_6	slugs_centralized	shields/momentum_shield	True	-10	False	ParticleMomentum	False	False	10	-30	Individual_Deep_Q	1.0	simple_mlp	False	0.05	2500000	6	True	IndivQLearningParticleDNN/156_15_6_slugs_decentralized	slugs_decentralized	shields/momentum_shield	0.05
IndivQLearningParticleDNN/156_15_6	slugs_centralized	shields/momentum_shield	True	-10	False	ParticleMomentum	False	False	10	-30	Individual_Deep_Q	1.0	simple_mlp	False	0.05	2500000	6	True	IndivQLearningParticleDNN/156_15_6_none	none		0.05
IndivQLearningParticleDNN/157_15_7	slugs_centralized	shields/momentum_shield	True	-10	False	ParticleMomentum	False	False	10	-30	Individual_Deep_Q	1.0	simple_mlp	False	0.05	2500000	7	True	IndivQLearningParticleDNN/157_15_7_slugs_centralized	slugs_centralized	shields/momentum_shield	0.05
IndivQLearningParticleDNN/157_15_7	slugs_centralized	shields/momentum_shield	True	-10	False	ParticleMomentum	False	False	10	-30	Individual_Deep_Q	1.0	simple_mlp	False	0.05	2500000	7	True	IndivQLearningParticleDNN/157_15_7_slugs_decentralized	slugs_decentralized	shields/momentum_shield	0.05
IndivQLearningParticleDNN/157_15_7	slugs_centralized	shields/momentum_shield	True	-10	False	ParticleMomentum	False	False	10	-30	Individual_Deep_Q	1.0	simple_mlp	False	0.05	2500000	7	True	IndivQLearningParticleDNN/157_15_7_none	none		0.05
IndivQLearningParticleDNN/158_15_8	slugs_centralized	shields/momentum_shield	True	-10	False	ParticleMomentum	False	False	10	-30	Individual_Deep_Q	1.0	simple_mlp	False	0.05	2500000	8	True	IndivQLearningParticleDNN/158_15_8_slugs_centralized	slugs_centralized	shields/momentum_shield	0.05
IndivQLearningParticleDNN/158_15_8	slugs_centralized	shields/momentum_shield	True	-10	False	ParticleMomentum	False	False	10	-30	Individual_Deep_Q	1.0	simple_mlp	False	0.05	2500000	8	True	IndivQLearningParticleDNN/158_15_8_slugs_decentralized	slugs_decentralized	shields/momentum_shield	0.05
IndivQLearningParticleDNN/158_15_8	slugs_centralized	shields/momentum_shield	True	-10	False	ParticleMomentum	False	False	10	-30	Individual_Deep_Q	1.0	simple_mlp	False	0.05	2500000	8	True	IndivQLearningParticleDNN/158_15_8_none	none		0.05
IndivQLearningParticleDNN/159_15_9	slugs_centralized	shields/momentum_shield	True	-10	False	ParticleMomentum	False	False	10	-30	Individual_Deep_Q	1.0	simple_mlp	False	0.05	2500000	9	True	IndivQLearningParticleDNN/159_15_9_slugs_centralized	slugs_centralized	shields/momentum_shield	0.05
IndivQLearningParticleDNN/159_15_9	slugs_centralized	shields/momentum_shield	True	-10	False	ParticleMomentum	False	False	10	-30	Individual_Deep_Q	1.0	simple_mlp	False	0.05	2500000	9	True	IndivQLearningParticleDNN/159_15_9_slugs_decentralized	slugs_decentralized	shields/momentum_shield	0.05
IndivQLearningParticleDNN/159_15_9	slugs_centralized	shields/momentum_shield	True	-10	False	ParticleMomentum	False	False	10	-30	Individual_Deep_Q	1.0	simple_mlp	False	0.05	2500000	9	True	IndivQLearningParticleDNN/159_15_9_none	none		0.05
IndivQLearningParticleDNN/160_16_0	slugs_decentralized	shields/momentum_shield	True	-10	False	ParticleMomentum	True	False	10	-30	Individual_Deep_Q	1.0	simple_mlp	True	0.05	2500000	0	True	IndivQLearningParticleDNN/160_16_0_slugs_centralized	slugs_centralized	shields/momentum_shield	0.05
IndivQLearningParticleDNN/160_16_0	slugs_decentralized	shields/momentum_shield	True	-10	False	ParticleMomentum	True	False	10	-30	Individual_Deep_Q	1.0	simple_mlp	True	0.05	2500000	0	True	IndivQLearningParticleDNN/160_16_0_slugs_decentralized	slugs_decentralized	shields/momentum_shield	0.05
IndivQLearningParticleDNN/160_16_0	slugs_decentralized	shields/momentum_shield	True	-10	False	ParticleMomentum	True	False	10	-30	Individual_Deep_Q	1.0	simple_mlp	True	0.05	2500000	0	True	IndivQLearningParticleDNN/160_16_0_none	none		0.05
IndivQLearningParticleDNN/161_16_1	slugs_decentralized	shields/momentum_shield	True	-10	False	ParticleMomentum	True	False	10	-30	Individual_Deep_Q	1.0	simple_mlp	True	0.05	2500000	1	True	IndivQLearningParticleDNN/161_16_1_slugs_centralized	slugs_centralized	shields/momentum_shield	0.05
IndivQLearningParticleDNN/161_16_1	slugs_decentralized	shields/momentum_shield	True	-10	False	ParticleMomentum	True	False	10	-30	Individual_Deep_Q	1.0	simple_mlp	True	0.05	2500000	1	True	IndivQLearningParticleDNN/161_16_1_slugs_decentralized	slugs_decentralized	shields/momentum_shield	0.05
IndivQLearningParticleDNN/161_16_1	slugs_decentralized	shields/momentum_shield	True	-10	False	ParticleMomentum	True	False	10	-30	Individual_Deep_Q	1.0	simple_mlp	True	0.05	2500000	1	True	IndivQLearningParticleDNN/161_16_1_none	none		0.05
IndivQLearningParticleDNN/162_16_2	slugs_decentralized	shields/momentum_shield	True	-10	False	ParticleMomentum	True	False	10	-30	Individual_Deep_Q	1.0	simple_mlp	True	0.05	2500000	2	True	IndivQLearningParticleDNN/162_16_2_slugs_centralized	slugs_centralized	shields/momentum_shield	0.05
IndivQLearningParticleDNN/162_16_2	slugs_decentralized	shields/momentum_shield	True	-10	False	ParticleMomentum	True	False	10	-30	Individual_Deep_Q	1.0	simple_mlp	True	0.05	2500000	2	True	IndivQLearningParticleDNN/162_16_2_slugs_decentralized	slugs_decentralized	shields/momentum_shield	0.05
IndivQLearningParticleDNN/162_16_2	slugs_decentralized	shields/momentum_shield	True	-10	False	ParticleMomentum	True	False	10	-30	Individual_Deep_Q	1.0	simple_mlp	True	0.05	2500000	2	True	IndivQLearningParticleDNN/162_16_2_none	none		0.05
IndivQLearningParticleDNN/163_16_3	slugs_decentralized	shields/momentum_shield	True	-10	False	ParticleMomentum	True	False	10	-30	Individual_Deep_Q	1.0	simple_mlp	True	0.05	2500000	3	True	IndivQLearningParticleDNN/163_16_3_slugs_centralized	slugs_centralized	shields/momentum_shield	0.05
IndivQLearningParticleDNN/163_16_3	slugs_decentralized	shields/momentum_shield	True	-10	False	ParticleMomentum	True	False	10	-30	Individual_Deep_Q	1.0	simple_mlp	True	0.05	2500000	3	True	IndivQLearningParticleDNN/163_16_3_slugs_decentralized	slugs_decentralized	shields/momentum_shield	0.05
IndivQLearningParticleDNN/163_16_3	slugs_decentralized	shields/momentum_shield	True	-10	False	ParticleMomentum	True	False	10	-30	Individual_Deep_Q	1.0	simple_mlp	True	0.05	2500000	3	True	IndivQLearningParticleDNN/163_16_3_none	none		0.05
IndivQLearningParticleDNN/164_16_4	slugs_decentralized	shields/momentum_shield	True	-10	False	ParticleMomentum	True	False	10	-30	Individual_Deep_Q	1.0	simple_mlp	True	0.05	2500000	4	True	IndivQLearningParticleDNN/164_16_4_slugs_centralized	slugs_centralized	shields/momentum_shield	0.05
IndivQLearningParticleDNN/164_16_4	slugs_decentralized	shields/momentum_shield	True	-10	False	ParticleMomentum	True	False	10	-30	Individual_Deep_Q	1.0	simple_mlp	True	0.05	2500000	4	True	IndivQLearningParticleDNN/164_16_4_slugs_decentralized	slugs_decentralized	shields/momentum_shield	0.05
IndivQLearningParticleDNN/164_16_4	slugs_decentralized	shields/momentum_shield	True	-10	False	ParticleMomentum	True	False	10	-30	Individual_Deep_Q	1.0	simple_mlp	True	0.05	2500000	4	True	IndivQLearningParticleDNN/164_16_4_none	none		0.05
IndivQLearningParticleDNN/165_16_5	slugs_decentralized	shields/momentum_shield	True	-10	False	ParticleMomentum	True	False	10	-30	Individual_Deep_Q	1.0	simple_mlp	True	0.05	2500000	5	True	IndivQLearningParticleDNN/165_16_5_slugs_centralized	slugs_centralized	shields/momentum_shield	0.05
IndivQLearningParticleDNN/165_16_5	slugs_decentralized	shields/momentum_shield	True	-10	False	ParticleMomentum	True	False	10	-30	Individual_Deep_Q	1.0	simple_mlp	True	0.05	2500000	5	True	IndivQLearningParticleDNN/165_16_5_slugs_decentralized	slugs_decentralized	shields/momentum_shield	0.05
IndivQLearningParticleDNN/165_16_5	slugs_decentralized	shields/momentum_shield	True	-10	False	ParticleMomentum	True	False	10	-30	Individual_Deep_Q	1.0	simple_mlp	True	0.05	2500000	5	True	IndivQLearningParticleDNN/165_16_5_none	none		0.05
IndivQLearningParticleDNN/166_16_6	slugs_decentralized	shields/momentum_shield	True	-10	False	ParticleMomentum	True	False	10	-30	Individual_Deep_Q	1.0	simple_mlp	True	0.05	2500000	6	True	IndivQLearningParticleDNN/166_16_6_slugs_centralized	slugs_centralized	shields/momentum_shield	0.05
IndivQLearningParticleDNN/166_16_6	slugs_decentralized	shields/momentum_shield	True	-10	False	ParticleMomentum	True	False	10	-30	Individual_Deep_Q	1.0	simple_mlp	True	0.05	2500000	6	True	IndivQLearningParticleDNN/166_16_6_slugs_decentralized	slugs_decentralized	shields/momentum_shield	0.05
IndivQLearningParticleDNN/166_16_6	slugs_decentralized	shields/momentum_shield	True	-10	False	ParticleMomentum	True	False	10	-30	Individual_Deep_Q	1.0	simple_mlp	True	0.05	2500000	6	True	IndivQLearningParticleDNN/166_16_6_none	none		0.05
IndivQLearningParticleDNN/167_16_7	slugs_decentralized	shields/momentum_shield	True	-10	False	ParticleMomentum	True	False	10	-30	Individual_Deep_Q	1.0	simple_mlp	True	0.05	2500000	7	True	IndivQLearningParticleDNN/167_16_7_slugs_centralized	slugs_centralized	shields/momentum_shield	0.05
IndivQLearningParticleDNN/167_16_7	slugs_decentralized	shields/momentum_shield	True	-10	False	ParticleMomentum	True	False	10	-30	Individual_Deep_Q	1.0	simple_mlp	True	0.05	2500000	7	True	IndivQLearningParticleDNN/167_16_7_slugs_decentralized	slugs_decentralized	shields/momentum_shield	0.05
IndivQLearningParticleDNN/167_16_7	slugs_decentralized	shields/momentum_shield	True	-10	False	ParticleMomentum	True	False	10	-30	Individual_Deep_Q	1.0	simple_mlp	True	0.05	2500000	7	True	IndivQLearningParticleDNN/167_16_7_none	none		0.05
IndivQLearningParticleDNN/168_16_8	slugs_decentralized	shields/momentum_shield	True	-10	False	ParticleMomentum	True	False	10	-30	Individual_Deep_Q	1.0	simple_mlp	True	0.05	2500000	8	True	IndivQLearningParticleDNN/168_16_8_slugs_centralized	slugs_centralized	shields/momentum_shield	0.05
IndivQLearningParticleDNN/168_16_8	slugs_decentralized	shields/momentum_shield	True	-10	False	ParticleMomentum	True	False	10	-30	Individual_Deep_Q	1.0	simple_mlp	True	0.05	2500000	8	True	IndivQLearningParticleDNN/168_16_8_slugs_decentralized	slugs_decentralized	shields/momentum_shield	0.05
IndivQLearningParticleDNN/168_16_8	slugs_decentralized	shields/momentum_shield	True	-10	False	ParticleMomentum	True	False	10	-30	Individual_Deep_Q	1.0	simple_mlp	True	0.05	2500000	8	True	IndivQLearningParticleDNN/168_16_8_none	none		0.05
IndivQLearningParticleDNN/169_16_9	slugs_decentralized	shields/momentum_shield	True	-10	False	ParticleMomentum	True	False	10	-30	Individual_Deep_Q	1.0	simple_mlp	True	0.05	2500000	9	True	IndivQLearningParticleDNN/169_16_9_slugs_centralized	slugs_centralized	shields/momentum_shield	0.05
IndivQLearningParticleDNN/169_16_9	slugs_decentralized	shields/momentum_shield	True	-10	False	ParticleMomentum	True	False	10	-30	Individual_Deep_Q	1.0	simple_mlp	True	0.05	2500000	9	True	IndivQLearningParticleDNN/169_16_9_slugs_decentralized	slugs_decentralized	shields/momentum_shield	0.05
IndivQLearningParticleDNN/169_16_9	slugs_decentralized	shields/momentum_shield	True	-10	False	ParticleMomentum	True	False	10	-30	Individual_Deep_Q	1.0	simple_mlp	True	0.05	2500000	9	True	IndivQLearningParticleDNN/169_16_9_none	none		0.05
IndivQLearningParticleDNN/170_17_0	slugs_decentralized	shields/momentum_shield	True	-10	False	ParticleMomentum	True	False	10	-30	Individual_Deep_Q	1.0	simple_mlp	False	0.05	2500000	0	True	IndivQLearningParticleDNN/170_17_0_slugs_centralized	slugs_centralized	shields/momentum_shield	0.05
IndivQLearningParticleDNN/170_17_0	slugs_decentralized	shields/momentum_shield	True	-10	False	ParticleMomentum	True	False	10	-30	Individual_Deep_Q	1.0	simple_mlp	False	0.05	2500000	0	True	IndivQLearningParticleDNN/170_17_0_slugs_decentralized	slugs_decentralized	shields/momentum_shield	0.05
IndivQLearningParticleDNN/170_17_0	slugs_decentralized	shields/momentum_shield	True	-10	False	ParticleMomentum	True	False	10	-30	Individual_Deep_Q	1.0	simple_mlp	False	0.05	2500000	0	True	IndivQLearningParticleDNN/170_17_0_none	none		0.05
IndivQLearningParticleDNN/171_17_1	slugs_decentralized	shields/momentum_shield	True	-10	False	ParticleMomentum	True	False	10	-30	Individual_Deep_Q	1.0	simple_mlp	False	0.05	2500000	1	True	IndivQLearningParticleDNN/171_17_1_slugs_centralized	slugs_centralized	shields/momentum_shield	0.05
IndivQLearningParticleDNN/171_17_1	slugs_decentralized	shields/momentum_shield	True	-10	False	ParticleMomentum	True	False	10	-30	Individual_Deep_Q	1.0	simple_mlp	False	0.05	2500000	1	True	IndivQLearningParticleDNN/171_17_1_slugs_decentralized	slugs_decentralized	shields/momentum_shield	0.05
IndivQLearningParticleDNN/171_17_1	slugs_decentralized	shields/momentum_shield	True	-10	False	ParticleMomentum	True	False	10	-30	Individual_Deep_Q	1.0	simple_mlp	False	0.05	2500000	1	True	IndivQLearningParticleDNN/171_17_1_none	none		0.05
IndivQLearningParticleDNN/172_17_2	slugs_decentralized	shields/momentum_shield	True	-10	False	ParticleMomentum	True	False	10	-30	Individual_Deep_Q	1.0	simple_mlp	False	0.05	2500000	2	True	IndivQLearningParticleDNN/172_17_2_slugs_centralized	slugs_centralized	shields/momentum_shield	0.05
IndivQLearningParticleDNN/172_17_2	slugs_decentralized	shields/momentum_shield	True	-10	False	ParticleMomentum	True	False	10	-30	Individual_Deep_Q	1.0	simple_mlp	False	0.05	2500000	2	True	IndivQLearningParticleDNN/172_17_2_slugs_decentralized	slugs_decentralized	shields/momentum_shield	0.05
IndivQLearningParticleDNN/172_17_2	slugs_decentralized	shields/momentum_shield	True	-10	False	ParticleMomentum	True	False	10	-30	Individual_Deep_Q	1.0	simple_mlp	False	0.05	2500000	2	True	IndivQLearningParticleDNN/172_17_2_none	none		0.05
IndivQLearningParticleDNN/173_17_3	slugs_decentralized	shields/momentum_shield	True	-10	False	ParticleMomentum	True	False	10	-30	Individual_Deep_Q	1.0	simple_mlp	False	0.05	2500000	3	True	IndivQLearningParticleDNN/173_17_3_slugs_centralized	slugs_centralized	shields/momentum_shield	0.05
IndivQLearningParticleDNN/173_17_3	slugs_decentralized	shields/momentum_shield	True	-10	False	ParticleMomentum	True	False	10	-30	Individual_Deep_Q	1.0	simple_mlp	False	0.05	2500000	3	True	IndivQLearningParticleDNN/173_17_3_slugs_decentralized	slugs_decentralized	shields/momentum_shield	0.05
IndivQLearningParticleDNN/173_17_3	slugs_decentralized	shields/momentum_shield	True	-10	False	ParticleMomentum	True	False	10	-30	Individual_Deep_Q	1.0	simple_mlp	False	0.05	2500000	3	True	IndivQLearningParticleDNN/173_17_3_none	none		0.05
IndivQLearningParticleDNN/174_17_4	slugs_decentralized	shields/momentum_shield	True	-10	False	ParticleMomentum	True	False	10	-30	Individual_Deep_Q	1.0	simple_mlp	False	0.05	2500000	4	True	IndivQLearningParticleDNN/174_17_4_slugs_centralized	slugs_centralized	shields/momentum_shield	0.05
IndivQLearningParticleDNN/174_17_4	slugs_decentralized	shields/momentum_shield	True	-10	False	ParticleMomentum	True	False	10	-30	Individual_Deep_Q	1.0	simple_mlp	False	0.05	2500000	4	True	IndivQLearningParticleDNN/174_17_4_slugs_decentralized	slugs_decentralized	shields/momentum_shield	0.05
IndivQLearningParticleDNN/174_17_4	slugs_decentralized	shields/momentum_shield	True	-10	False	ParticleMomentum	True	False	10	-30	Individual_Deep_Q	1.0	simple_mlp	False	0.05	2500000	4	True	IndivQLearningParticleDNN/174_17_4_none	none		0.05
IndivQLearningParticleDNN/175_17_5	slugs_decentralized	shields/momentum_shield	True	-10	False	ParticleMomentum	True	False	10	-30	Individual_Deep_Q	1.0	simple_mlp	False	0.05	2500000	5	True	IndivQLearningParticleDNN/175_17_5_slugs_centralized	slugs_centralized	shields/momentum_shield	0.05
IndivQLearningParticleDNN/175_17_5	slugs_decentralized	shields/momentum_shield	True	-10	False	ParticleMomentum	True	False	10	-30	Individual_Deep_Q	1.0	simple_mlp	False	0.05	2500000	5	True	IndivQLearningParticleDNN/175_17_5_slugs_decentralized	slugs_decentralized	shields/momentum_shield	0.05
IndivQLearningParticleDNN/175_17_5	slugs_decentralized	shields/momentum_shield	True	-10	False	ParticleMomentum	True	False	10	-30	Individual_Deep_Q	1.0	simple_mlp	False	0.05	2500000	5	True	IndivQLearningParticleDNN/175_17_5_none	none		0.05
IndivQLearningParticleDNN/176_17_6	slugs_decentralized	shields/momentum_shield	True	-10	False	ParticleMomentum	True	False	10	-30	Individual_Deep_Q	1.0	simple_mlp	False	0.05	2500000	6	True	IndivQLearningParticleDNN/176_17_6_slugs_centralized	slugs_centralized	shields/momentum_shield	0.05
IndivQLearningParticleDNN/176_17_6	slugs_decentralized	shields/momentum_shield	True	-10	False	ParticleMomentum	True	False	10	-30	Individual_Deep_Q	1.0	simple_mlp	False	0.05	2500000	6	True	IndivQLearningParticleDNN/176_17_6_slugs_decentralized	slugs_decentralized	shields/momentum_shield	0.05
IndivQLearningParticleDNN/176_17_6	slugs_decentralized	shields/momentum_shield	True	-10	False	ParticleMomentum	True	False	10	-30	Individual_Deep_Q	1.0	simple_mlp	False	0.05	2500000	6	True	IndivQLearningParticleDNN/176_17_6_none	none		0.05
IndivQLearningParticleDNN/177_17_7	slugs_decentralized	shields/momentum_shield	True	-10	False	ParticleMomentum	True	False	10	-30	Individual_Deep_Q	1.0	simple_mlp	False	0.05	2500000	7	True	IndivQLearningParticleDNN/177_17_7_slugs_centralized	slugs_centralized	shields/momentum_shield	0.05
IndivQLearningParticleDNN/177_17_7	slugs_decentralized	shields/momentum_shield	True	-10	False	ParticleMomentum	True	False	10	-30	Individual_Deep_Q	1.0	simple_mlp	False	0.05	2500000	7	True	IndivQLearningParticleDNN/177_17_7_slugs_decentralized	slugs_decentralized	shields/momentum_shield	0.05
IndivQLearningParticleDNN/177_17_7	slugs_decentralized	shields/momentum_shield	True	-10	False	ParticleMomentum	True	False	10	-30	Individual_Deep_Q	1.0	simple_mlp	False	0.05	2500000	7	True	IndivQLearningParticleDNN/177_17_7_none	none		0.05
IndivQLearningParticleDNN/178_17_8	slugs_decentralized	shields/momentum_shield	True	-10	False	ParticleMomentum	True	False	10	-30	Individual_Deep_Q	1.0	simple_mlp	False	0.05	2500000	8	True	IndivQLearningParticleDNN/178_17_8_slugs_centralized	slugs_centralized	shields/momentum_shield	0.05
IndivQLearningParticleDNN/178_17_8	slugs_decentralized	shields/momentum_shield	True	-10	False	ParticleMomentum	True	False	10	-30	Individual_Deep_Q	1.0	simple_mlp	False	0.05	2500000	8	True	IndivQLearningParticleDNN/178_17_8_slugs_decentralized	slugs_decentralized	shields/momentum_shield	0.05
IndivQLearningParticleDNN/178_17_8	slugs_decentralized	shields/momentum_shield	True	-10	False	ParticleMomentum	True	False	10	-30	Individual_Deep_Q	1.0	simple_mlp	False	0.05	2500000	8	True	IndivQLearningParticleDNN/178_17_8_none	none		0.05
IndivQLearningParticleDNN/179_17_9	slugs_decentralized	shields/momentum_shield	True	-10	False	ParticleMomentum	True	False	10	-30	Individual_Deep_Q	1.0	simple_mlp	False	0.05	2500000	9	True	IndivQLearningParticleDNN/179_17_9_slugs_centralized	slugs_centralized	shields/momentum_shield	0.05
IndivQLearningParticleDNN/179_17_9	slugs_decentralized	shields/momentum_shield	True	-10	False	ParticleMomentum	True	False	10	-30	Individual_Deep_Q	1.0	simple_mlp	False	0.05	2500000	9	True	IndivQLearningParticleDNN/179_17_9_slugs_decentralized	slugs_decentralized	shields/momentum_shield	0.05
IndivQLearningParticleDNN/179_17_9	slugs_decentralized	shields/momentum_shield	True	-10	False	ParticleMomentum	True	False	10	-30	Individual_Deep_Q	1.0	simple_mlp	False	0.05	2500000	9	True	IndivQLearningParticleDNN/179_17_9_none	none		0.05
IndivQLearningParticleDNN/180_18_0	slugs_decentralized	shields/momentum_shield	True	-10	False	ParticleMomentum	False	False	10	-30	Individual_Deep_Q	1.0	simple_mlp	True	0.05	2500000	0	True	IndivQLearningParticleDNN/180_18_0_slugs_centralized	slugs_centralized	shields/momentum_shield	0.05
IndivQLearningParticleDNN/180_18_0	slugs_decentralized	shields/momentum_shield	True	-10	False	ParticleMomentum	False	False	10	-30	Individual_Deep_Q	1.0	simple_mlp	True	0.05	2500000	0	True	IndivQLearningParticleDNN/180_18_0_slugs_decentralized	slugs_decentralized	shields/momentum_shield	0.05
IndivQLearningParticleDNN/180_18_0	slugs_decentralized	shields/momentum_shield	True	-10	False	ParticleMomentum	False	False	10	-30	Individual_Deep_Q	1.0	simple_mlp	True	0.05	2500000	0	True	IndivQLearningParticleDNN/180_18_0_none	none		0.05
IndivQLearningParticleDNN/181_18_1	slugs_decentralized	shields/momentum_shield	True	-10	False	ParticleMomentum	False	False	10	-30	Individual_Deep_Q	1.0	simple_mlp	True	0.05	2500000	1	True	IndivQLearningParticleDNN/181_18_1_slugs_centralized	slugs_centralized	shields/momentum_shield	0.05
IndivQLearningParticleDNN/181_18_1	slugs_decentralized	shields/momentum_shield	True	-10	False	ParticleMomentum	False	False	10	-30	Individual_Deep_Q	1.0	simple_mlp	True	0.05	2500000	1	True	IndivQLearningParticleDNN/181_18_1_slugs_decentralized	slugs_decentralized	shields/momentum_shield	0.05
IndivQLearningParticleDNN/181_18_1	slugs_decentralized	shields/momentum_shield	True	-10	False	ParticleMomentum	False	False	10	-30	Individual_Deep_Q	1.0	simple_mlp	True	0.05	2500000	1	True	IndivQLearningParticleDNN/181_18_1_none	none		0.05
IndivQLearningParticleDNN/182_18_2	slugs_decentralized	shields/momentum_shield	True	-10	False	ParticleMomentum	False	False	10	-30	Individual_Deep_Q	1.0	simple_mlp	True	0.05	2500000	2	True	IndivQLearningParticleDNN/182_18_2_slugs_centralized	slugs_centralized	shields/momentum_shield	0.05
IndivQLearningParticleDNN/182_18_2	slugs_decentralized	shields/momentum_shield	True	-10	False	ParticleMomentum	False	False	10	-30	Individual_Deep_Q	1.0	simple_mlp	True	0.05	2500000	2	True	IndivQLearningParticleDNN/182_18_2_slugs_decentralized	slugs_decentralized	shields/momentum_shield	0.05
IndivQLearningParticleDNN/182_18_2	slugs_decentralized	shields/momentum_shield	True	-10	False	ParticleMomentum	False	False	10	-30	Individual_Deep_Q	1.0	simple_mlp	True	0.05	2500000	2	True	IndivQLearningParticleDNN/182_18_2_none	none		0.05
IndivQLearningParticleDNN/183_18_3	slugs_decentralized	shields/momentum_shield	True	-10	False	ParticleMomentum	False	False	10	-30	Individual_Deep_Q	1.0	simple_mlp	True	0.05	2500000	3	True	IndivQLearningParticleDNN/183_18_3_slugs_centralized	slugs_centralized	shields/momentum_shield	0.05
IndivQLearningParticleDNN/183_18_3	slugs_decentralized	shields/momentum_shield	True	-10	False	ParticleMomentum	False	False	10	-30	Individual_Deep_Q	1.0	simple_mlp	True	0.05	2500000	3	True	IndivQLearningParticleDNN/183_18_3_slugs_decentralized	slugs_decentralized	shields/momentum_shield	0.05
IndivQLearningParticleDNN/183_18_3	slugs_decentralized	shields/momentum_shield	True	-10	False	ParticleMomentum	False	False	10	-30	Individual_Deep_Q	1.0	simple_mlp	True	0.05	2500000	3	True	IndivQLearningParticleDNN/183_18_3_none	none		0.05
IndivQLearningParticleDNN/184_18_4	slugs_decentralized	shields/momentum_shield	True	-10	False	ParticleMomentum	False	False	10	-30	Individual_Deep_Q	1.0	simple_mlp	True	0.05	2500000	4	True	IndivQLearningParticleDNN/184_18_4_slugs_centralized	slugs_centralized	shields/momentum_shield	0.05
IndivQLearningParticleDNN/184_18_4	slugs_decentralized	shields/momentum_shield	True	-10	False	ParticleMomentum	False	False	10	-30	Individual_Deep_Q	1.0	simple_mlp	True	0.05	2500000	4	True	IndivQLearningParticleDNN/184_18_4_slugs_decentralized	slugs_decentralized	shields/momentum_shield	0.05
IndivQLearningParticleDNN/184_18_4	slugs_decentralized	shields/momentum_shield	True	-10	False	ParticleMomentum	False	False	10	-30	Individual_Deep_Q	1.0	simple_mlp	True	0.05	2500000	4	True	IndivQLearningParticleDNN/184_18_4_none	none		0.05
IndivQLearningParticleDNN/185_18_5	slugs_decentralized	shields/momentum_shield	True	-10	False	ParticleMomentum	False	False	10	-30	Individual_Deep_Q	1.0	simple_mlp	True	0.05	2500000	5	True	IndivQLearningParticleDNN/185_18_5_slugs_centralized	slugs_centralized	shields/momentum_shield	0.05
IndivQLearningParticleDNN/185_18_5	slugs_decentralized	shields/momentum_shield	True	-10	False	ParticleMomentum	False	False	10	-30	Individual_Deep_Q	1.0	simple_mlp	True	0.05	2500000	5	True	IndivQLearningParticleDNN/185_18_5_slugs_decentralized	slugs_decentralized	shields/momentum_shield	0.05
IndivQLearningParticleDNN/185_18_5	slugs_decentralized	shields/momentum_shield	True	-10	False	ParticleMomentum	False	False	10	-30	Individual_Deep_Q	1.0	simple_mlp	True	0.05	2500000	5	True	IndivQLearningParticleDNN/185_18_5_none	none		0.05
IndivQLearningParticleDNN/186_18_6	slugs_decentralized	shields/momentum_shield	True	-10	False	ParticleMomentum	False	False	10	-30	Individual_Deep_Q	1.0	simple_mlp	True	0.05	2500000	6	True	IndivQLearningParticleDNN/186_18_6_slugs_centralized	slugs_centralized	shields/momentum_shield	0.05
IndivQLearningParticleDNN/186_18_6	slugs_decentralized	shields/momentum_shield	True	-10	False	ParticleMomentum	False	False	10	-30	Individual_Deep_Q	1.0	simple_mlp	True	0.05	2500000	6	True	IndivQLearningParticleDNN/186_18_6_slugs_decentralized	slugs_decentralized	shields/momentum_shield	0.05
IndivQLearningParticleDNN/186_18_6	slugs_decentralized	shields/momentum_shield	True	-10	False	ParticleMomentum	False	False	10	-30	Individual_Deep_Q	1.0	simple_mlp	True	0.05	2500000	6	True	IndivQLearningParticleDNN/186_18_6_none	none		0.05
IndivQLearningParticleDNN/187_18_7	slugs_decentralized	shields/momentum_shield	True	-10	False	ParticleMomentum	False	False	10	-30	Individual_Deep_Q	1.0	simple_mlp	True	0.05	2500000	7	True	IndivQLearningParticleDNN/187_18_7_slugs_centralized	slugs_centralized	shields/momentum_shield	0.05
IndivQLearningParticleDNN/187_18_7	slugs_decentralized	shields/momentum_shield	True	-10	False	ParticleMomentum	False	False	10	-30	Individual_Deep_Q	1.0	simple_mlp	True	0.05	2500000	7	True	IndivQLearningParticleDNN/187_18_7_slugs_decentralized	slugs_decentralized	shields/momentum_shield	0.05
IndivQLearningParticleDNN/187_18_7	slugs_decentralized	shields/momentum_shield	True	-10	False	ParticleMomentum	False	False	10	-30	Individual_Deep_Q	1.0	simple_mlp	True	0.05	2500000	7	True	IndivQLearningParticleDNN/187_18_7_none	none		0.05
IndivQLearningParticleDNN/188_18_8	slugs_decentralized	shields/momentum_shield	True	-10	False	ParticleMomentum	False	False	10	-30	Individual_Deep_Q	1.0	simple_mlp	True	0.05	2500000	8	True	IndivQLearningParticleDNN/188_18_8_slugs_centralized	slugs_centralized	shields/momentum_shield	0.05
IndivQLearningParticleDNN/188_18_8	slugs_decentralized	shields/momentum_shield	True	-10	False	ParticleMomentum	False	False	10	-30	Individual_Deep_Q	1.0	simple_mlp	True	0.05	2500000	8	True	IndivQLearningParticleDNN/188_18_8_slugs_decentralized	slugs_decentralized	shields/momentum_shield	0.05
IndivQLearningParticleDNN/188_18_8	slugs_decentralized	shields/momentum_shield	True	-10	False	ParticleMomentum	False	False	10	-30	Individual_Deep_Q	1.0	simple_mlp	True	0.05	2500000	8	True	IndivQLearningParticleDNN/188_18_8_none	none		0.05
IndivQLearningParticleDNN/189_18_9	slugs_decentralized	shields/momentum_shield	True	-10	False	ParticleMomentum	False	False	10	-30	Individual_Deep_Q	1.0	simple_mlp	True	0.05	2500000	9	True	IndivQLearningParticleDNN/189_18_9_slugs_centralized	slugs_centralized	shields/momentum_shield	0.05
IndivQLearningParticleDNN/189_18_9	slugs_decentralized	shields/momentum_shield	True	-10	False	ParticleMomentum	False	False	10	-30	Individual_Deep_Q	1.0	simple_mlp	True	0.05	2500000	9	True	IndivQLearningParticleDNN/189_18_9_slugs_decentralized	slugs_decentralized	shields/momentum_shield	0.05
IndivQLearningParticleDNN/189_18_9	slugs_decentralized	shields/momentum_shield	True	-10	False	ParticleMomentum	False	False	10	-30	Individual_Deep_Q	1.0	simple_mlp	True	0.05	2500000	9	True	IndivQLearningParticleDNN/189_18_9_none	none		0.05
IndivQLearningParticleDNN/190_19_0	slugs_decentralized	shields/momentum_shield	True	-10	False	ParticleMomentum	False	False	10	-30	Individual_Deep_Q	1.0	simple_mlp	False	0.05	2500000	0	True	IndivQLearningParticleDNN/190_19_0_slugs_centralized	slugs_centralized	shields/momentum_shield	0.05
IndivQLearningParticleDNN/190_19_0	slugs_decentralized	shields/momentum_shield	True	-10	False	ParticleMomentum	False	False	10	-30	Individual_Deep_Q	1.0	simple_mlp	False	0.05	2500000	0	True	IndivQLearningParticleDNN/190_19_0_slugs_decentralized	slugs_decentralized	shields/momentum_shield	0.05
IndivQLearningParticleDNN/190_19_0	slugs_decentralized	shields/momentum_shield	True	-10	False	ParticleMomentum	False	False	10	-30	Individual_Deep_Q	1.0	simple_mlp	False	0.05	2500000	0	True	IndivQLearningParticleDNN/190_19_0_none	none		0.05
IndivQLearningParticleDNN/191_19_1	slugs_decentralized	shields/momentum_shield	True	-10	False	ParticleMomentum	False	False	10	-30	Individual_Deep_Q	1.0	simple_mlp	False	0.05	2500000	1	True	IndivQLearningParticleDNN/191_19_1_slugs_centralized	slugs_centralized	shields/momentum_shield	0.05
IndivQLearningParticleDNN/191_19_1	slugs_decentralized	shields/momentum_shield	True	-10	False	ParticleMomentum	False	False	10	-30	Individual_Deep_Q	1.0	simple_mlp	False	0.05	2500000	1	True	IndivQLearningParticleDNN/191_19_1_slugs_decentralized	slugs_decentralized	shields/momentum_shield	0.05
IndivQLearningParticleDNN/191_19_1	slugs_decentralized	shields/momentum_shield	True	-10	False	ParticleMomentum	False	False	10	-30	Individual_Deep_Q	1.0	simple_mlp	False	0.05	2500000	1	True	IndivQLearningParticleDNN/191_19_1_none	none		0.05
IndivQLearningParticleDNN/192_19_2	slugs_decentralized	shields/momentum_shield	True	-10	False	ParticleMomentum	False	False	10	-30	Individual_Deep_Q	1.0	simple_mlp	False	0.05	2500000	2	True	IndivQLearningParticleDNN/192_19_2_slugs_centralized	slugs_centralized	shields/momentum_shield	0.05
IndivQLearningParticleDNN/192_19_2	slugs_decentralized	shields/momentum_shield	True	-10	False	ParticleMomentum	False	False	10	-30	Individual_Deep_Q	1.0	simple_mlp	False	0.05	2500000	2	True	IndivQLearningParticleDNN/192_19_2_slugs_decentralized	slugs_decentralized	shields/momentum_shield	0.05
IndivQLearningParticleDNN/192_19_2	slugs_decentralized	shields/momentum_shield	True	-10	False	ParticleMomentum	False	False	10	-30	Individual_Deep_Q	1.0	simple_mlp	False	0.05	2500000	2	True	IndivQLearningParticleDNN/192_19_2_none	none		0.05
IndivQLearningParticleDNN/193_19_3	slugs_decentralized	shields/momentum_shield	True	-10	False	ParticleMomentum	False	False	10	-30	Individual_Deep_Q	1.0	simple_mlp	False	0.05	2500000	3	True	IndivQLearningParticleDNN/193_19_3_slugs_centralized	slugs_centralized	shields/momentum_shield	0.05
IndivQLearningParticleDNN/193_19_3	slugs_decentralized	shields/momentum_shield	True	-10	False	ParticleMomentum	False	False	10	-30	Individual_Deep_Q	1.0	simple_mlp	False	0.05	2500000	3	True	IndivQLearningParticleDNN/193_19_3_slugs_decentralized	slugs_decentralized	shields/momentum_shield	0.05
IndivQLearningParticleDNN/193_19_3	slugs_decentralized	shields/momentum_shield	True	-10	False	ParticleMomentum	False	False	10	-30	Individual_Deep_Q	1.0	simple_mlp	False	0.05	2500000	3	True	IndivQLearningParticleDNN/193_19_3_none	none		0.05
IndivQLearningParticleDNN/194_19_4	slugs_decentralized	shields/momentum_shield	True	-10	False	ParticleMomentum	False	False	10	-30	Individual_Deep_Q	1.0	simple_mlp	False	0.05	2500000	4	True	IndivQLearningParticleDNN/194_19_4_slugs_centralized	slugs_centralized	shields/momentum_shield	0.05
IndivQLearningParticleDNN/194_19_4	slugs_decentralized	shields/momentum_shield	True	-10	False	ParticleMomentum	False	False	10	-30	Individual_Deep_Q	1.0	simple_mlp	False	0.05	2500000	4	True	IndivQLearningParticleDNN/194_19_4_slugs_decentralized	slugs_decentralized	shields/momentum_shield	0.05
IndivQLearningParticleDNN/194_19_4	slugs_decentralized	shields/momentum_shield	True	-10	False	ParticleMomentum	False	False	10	-30	Individual_Deep_Q	1.0	simple_mlp	False	0.05	2500000	4	True	IndivQLearningParticleDNN/194_19_4_none	none		0.05
IndivQLearningParticleDNN/195_19_5	slugs_decentralized	shields/momentum_shield	True	-10	False	ParticleMomentum	False	False	10	-30	Individual_Deep_Q	1.0	simple_mlp	False	0.05	2500000	5	True	IndivQLearningParticleDNN/195_19_5_slugs_centralized	slugs_centralized	shields/momentum_shield	0.05
IndivQLearningParticleDNN/195_19_5	slugs_decentralized	shields/momentum_shield	True	-10	False	ParticleMomentum	False	False	10	-30	Individual_Deep_Q	1.0	simple_mlp	False	0.05	2500000	5	True	IndivQLearningParticleDNN/195_19_5_slugs_decentralized	slugs_decentralized	shields/momentum_shield	0.05
IndivQLearningParticleDNN/195_19_5	slugs_decentralized	shields/momentum_shield	True	-10	False	ParticleMomentum	False	False	10	-30	Individual_Deep_Q	1.0	simple_mlp	False	0.05	2500000	5	True	IndivQLearningParticleDNN/195_19_5_none	none		0.05
IndivQLearningParticleDNN/196_19_6	slugs_decentralized	shields/momentum_shield	True	-10	False	ParticleMomentum	False	False	10	-30	Individual_Deep_Q	1.0	simple_mlp	False	0.05	2500000	6	True	IndivQLearningParticleDNN/196_19_6_slugs_centralized	slugs_centralized	shields/momentum_shield	0.05
IndivQLearningParticleDNN/196_19_6	slugs_decentralized	shields/momentum_shield	True	-10	False	ParticleMomentum	False	False	10	-30	Individual_Deep_Q	1.0	simple_mlp	False	0.05	2500000	6	True	IndivQLearningParticleDNN/196_19_6_slugs_decentralized	slugs_decentralized	shields/momentum_shield	0.05
IndivQLearningParticleDNN/196_19_6	slugs_decentralized	shields/momentum_shield	True	-10	False	ParticleMomentum	False	False	10	-30	Individual_Deep_Q	1.0	simple_mlp	False	0.05	2500000	6	True	IndivQLearningParticleDNN/196_19_6_none	none		0.05
IndivQLearningParticleDNN/197_19_7	slugs_decentralized	shields/momentum_shield	True	-10	False	ParticleMomentum	False	False	10	-30	Individual_Deep_Q	1.0	simple_mlp	False	0.05	2500000	7	True	IndivQLearningParticleDNN/197_19_7_slugs_centralized	slugs_centralized	shields/momentum_shield	0.05
IndivQLearningParticleDNN/197_19_7	slugs_decentralized	shields/momentum_shield	True	-10	False	ParticleMomentum	False	False	10	-30	Individual_Deep_Q	1.0	simple_mlp	False	0.05	2500000	7	True	IndivQLearningParticleDNN/197_19_7_slugs_decentralized	slugs_decentralized	shields/momentum_shield	0.05
IndivQLearningParticleDNN/197_19_7	slugs_decentralized	shields/momentum_shield	True	-10	False	ParticleMomentum	False	False	10	-30	Individual_Deep_Q	1.0	simple_mlp	False	0.05	2500000	7	True	IndivQLearningParticleDNN/197_19_7_none	none		0.05
IndivQLearningParticleDNN/198_19_8	slugs_decentralized	shields/momentum_shield	True	-10	False	ParticleMomentum	False	False	10	-30	Individual_Deep_Q	1.0	simple_mlp	False	0.05	2500000	8	True	IndivQLearningParticleDNN/198_19_8_slugs_centralized	slugs_centralized	shields/momentum_shield	0.05
IndivQLearningParticleDNN/198_19_8	slugs_decentralized	shields/momentum_shield	True	-10	False	ParticleMomentum	False	False	10	-30	Individual_Deep_Q	1.0	simple_mlp	False	0.05	2500000	8	True	IndivQLearningParticleDNN/198_19_8_slugs_decentralized	slugs_decentralized	shields/momentum_shield	0.05
IndivQLearningParticleDNN/198_19_8	slugs_decentralized	shields/momentum_shield	True	-10	False	ParticleMomentum	False	False	10	-30	Individual_Deep_Q	1.0	simple_mlp	False	0.05	2500000	8	True	IndivQLearningParticleDNN/198_19_8_none	none		0.05
IndivQLearningParticleDNN/199_19_9	slugs_decentralized	shields/momentum_shield	True	-10	False	ParticleMomentum	False	False	10	-30	Individual_Deep_Q	1.0	simple_mlp	False	0.05	2500000	9	True	IndivQLearningParticleDNN/199_19_9_slugs_centralized	slugs_centralized	shields/momentum_shield	0.05
IndivQLearningParticleDNN/199_19_9	slugs_decentralized	shields/momentum_shield	True	-10	False	ParticleMomentum	False	False	10	-30	Individual_Deep_Q	1.0	simple_mlp	False	0.05	2500000	9	True	IndivQLearningParticleDNN/199_19_9_slugs_decentralized	slugs_decentralized	shields/momentum_shield	0.05
IndivQLearningParticleDNN/199_19_9	slugs_decentralized	shields/momentum_shield	True	-10	False	ParticleMomentum	False	False	10	-30	Individual_Deep_Q	1.0	simple_mlp	False	0.05	2500000	9	True	IndivQLearningParticleDNN/199_19_9_none	none		0.05
IndivQLearningParticleDNN/200_20_0	none		True	-10	False	ParticleMomentum	True	False	10	-30	Individual_Deep_Q	1.0	simple_mlp	True	0.05	2500000	0	True	IndivQLearningParticleDNN/200_20_0_slugs_centralized	slugs_centralized	shields/momentum_shield	0.05
IndivQLearningParticleDNN/200_20_0	none		True	-10	False	ParticleMomentum	True	False	10	-30	Individual_Deep_Q	1.0	simple_mlp	True	0.05	2500000	0	True	IndivQLearningParticleDNN/200_20_0_slugs_decentralized	slugs_decentralized	shields/momentum_shield	0.05
IndivQLearningParticleDNN/200_20_0	none		True	-10	False	ParticleMomentum	True	False	10	-30	Individual_Deep_Q	1.0	simple_mlp	True	0.05	2500000	0	True	IndivQLearningParticleDNN/200_20_0_none	none		0.05
IndivQLearningParticleDNN/201_20_1	none		True	-10	False	ParticleMomentum	True	False	10	-30	Individual_Deep_Q	1.0	simple_mlp	True	0.05	2500000	1	True	IndivQLearningParticleDNN/201_20_1_slugs_centralized	slugs_centralized	shields/momentum_shield	0.05
IndivQLearningParticleDNN/201_20_1	none		True	-10	False	ParticleMomentum	True	False	10	-30	Individual_Deep_Q	1.0	simple_mlp	True	0.05	2500000	1	True	IndivQLearningParticleDNN/201_20_1_slugs_decentralized	slugs_decentralized	shields/momentum_shield	0.05
IndivQLearningParticleDNN/201_20_1	none		True	-10	False	ParticleMomentum	True	False	10	-30	Individual_Deep_Q	1.0	simple_mlp	True	0.05	2500000	1	True	IndivQLearningParticleDNN/201_20_1_none	none		0.05
IndivQLearningParticleDNN/202_20_2	none		True	-10	False	ParticleMomentum	True	False	10	-30	Individual_Deep_Q	1.0	simple_mlp	True	0.05	2500000	2	True	IndivQLearningParticleDNN/202_20_2_slugs_centralized	slugs_centralized	shields/momentum_shield	0.05
IndivQLearningParticleDNN/202_20_2	none		True	-10	False	ParticleMomentum	True	False	10	-30	Individual_Deep_Q	1.0	simple_mlp	True	0.05	2500000	2	True	IndivQLearningParticleDNN/202_20_2_slugs_decentralized	slugs_decentralized	shields/momentum_shield	0.05
IndivQLearningParticleDNN/202_20_2	none		True	-10	False	ParticleMomentum	True	False	10	-30	Individual_Deep_Q	1.0	simple_mlp	True	0.05	2500000	2	True	IndivQLearningParticleDNN/202_20_2_none	none		0.05
IndivQLearningParticleDNN/203_20_3	none		True	-10	False	ParticleMomentum	True	False	10	-30	Individual_Deep_Q	1.0	simple_mlp	True	0.05	2500000	3	True	IndivQLearningParticleDNN/203_20_3_slugs_centralized	slugs_centralized	shields/momentum_shield	0.05
IndivQLearningParticleDNN/203_20_3	none		True	-10	False	ParticleMomentum	True	False	10	-30	Individual_Deep_Q	1.0	simple_mlp	True	0.05	2500000	3	True	IndivQLearningParticleDNN/203_20_3_slugs_decentralized	slugs_decentralized	shields/momentum_shield	0.05
IndivQLearningParticleDNN/203_20_3	none		True	-10	False	ParticleMomentum	True	False	10	-30	Individual_Deep_Q	1.0	simple_mlp	True	0.05	2500000	3	True	IndivQLearningParticleDNN/203_20_3_none	none		0.05
IndivQLearningParticleDNN/204_20_4	none		True	-10	False	ParticleMomentum	True	False	10	-30	Individual_Deep_Q	1.0	simple_mlp	True	0.05	2500000	4	True	IndivQLearningParticleDNN/204_20_4_slugs_centralized	slugs_centralized	shields/momentum_shield	0.05
IndivQLearningParticleDNN/204_20_4	none		True	-10	False	ParticleMomentum	True	False	10	-30	Individual_Deep_Q	1.0	simple_mlp	True	0.05	2500000	4	True	IndivQLearningParticleDNN/204_20_4_slugs_decentralized	slugs_decentralized	shields/momentum_shield	0.05
IndivQLearningParticleDNN/204_20_4	none		True	-10	False	ParticleMomentum	True	False	10	-30	Individual_Deep_Q	1.0	simple_mlp	True	0.05	2500000	4	True	IndivQLearningParticleDNN/204_20_4_none	none		0.05
IndivQLearningParticleDNN/205_20_5	none		True	-10	False	ParticleMomentum	True	False	10	-30	Individual_Deep_Q	1.0	simple_mlp	True	0.05	2500000	5	True	IndivQLearningParticleDNN/205_20_5_slugs_centralized	slugs_centralized	shields/momentum_shield	0.05
IndivQLearningParticleDNN/205_20_5	none		True	-10	False	ParticleMomentum	True	False	10	-30	Individual_Deep_Q	1.0	simple_mlp	True	0.05	2500000	5	True	IndivQLearningParticleDNN/205_20_5_slugs_decentralized	slugs_decentralized	shields/momentum_shield	0.05
IndivQLearningParticleDNN/205_20_5	none		True	-10	False	ParticleMomentum	True	False	10	-30	Individual_Deep_Q	1.0	simple_mlp	True	0.05	2500000	5	True	IndivQLearningParticleDNN/205_20_5_none	none		0.05
IndivQLearningParticleDNN/206_20_6	none		True	-10	False	ParticleMomentum	True	False	10	-30	Individual_Deep_Q	1.0	simple_mlp	True	0.05	2500000	6	True	IndivQLearningParticleDNN/206_20_6_slugs_centralized	slugs_centralized	shields/momentum_shield	0.05
IndivQLearningParticleDNN/206_20_6	none		True	-10	False	ParticleMomentum	True	False	10	-30	Individual_Deep_Q	1.0	simple_mlp	True	0.05	2500000	6	True	IndivQLearningParticleDNN/206_20_6_slugs_decentralized	slugs_decentralized	shields/momentum_shield	0.05
IndivQLearningParticleDNN/206_20_6	none		True	-10	False	ParticleMomentum	True	False	10	-30	Individual_Deep_Q	1.0	simple_mlp	True	0.05	2500000	6	True	IndivQLearningParticleDNN/206_20_6_none	none		0.05
IndivQLearningParticleDNN/207_20_7	none		True	-10	False	ParticleMomentum	True	False	10	-30	Individual_Deep_Q	1.0	simple_mlp	True	0.05	2500000	7	True	IndivQLearningParticleDNN/207_20_7_slugs_centralized	slugs_centralized	shields/momentum_shield	0.05
IndivQLearningParticleDNN/207_20_7	none		True	-10	False	ParticleMomentum	True	False	10	-30	Individual_Deep_Q	1.0	simple_mlp	True	0.05	2500000	7	True	IndivQLearningParticleDNN/207_20_7_slugs_decentralized	slugs_decentralized	shields/momentum_shield	0.05
IndivQLearningParticleDNN/207_20_7	none		True	-10	False	ParticleMomentum	True	False	10	-30	Individual_Deep_Q	1.0	simple_mlp	True	0.05	2500000	7	True	IndivQLearningParticleDNN/207_20_7_none	none		0.05
IndivQLearningParticleDNN/208_20_8	none		True	-10	False	ParticleMomentum	True	False	10	-30	Individual_Deep_Q	1.0	simple_mlp	True	0.05	2500000	8	True	IndivQLearningParticleDNN/208_20_8_slugs_centralized	slugs_centralized	shields/momentum_shield	0.05
IndivQLearningParticleDNN/208_20_8	none		True	-10	False	ParticleMomentum	True	False	10	-30	Individual_Deep_Q	1.0	simple_mlp	True	0.05	2500000	8	True	IndivQLearningParticleDNN/208_20_8_slugs_decentralized	slugs_decentralized	shields/momentum_shield	0.05
IndivQLearningParticleDNN/208_20_8	none		True	-10	False	ParticleMomentum	True	False	10	-30	Individual_Deep_Q	1.0	simple_mlp	True	0.05	2500000	8	True	IndivQLearningParticleDNN/208_20_8_none	none		0.05
IndivQLearningParticleDNN/209_20_9	none		True	-10	False	ParticleMomentum	True	False	10	-30	Individual_Deep_Q	1.0	simple_mlp	True	0.05	2500000	9	True	IndivQLearningParticleDNN/209_20_9_slugs_centralized	slugs_centralized	shields/momentum_shield	0.05
IndivQLearningParticleDNN/209_20_9	none		True	-10	False	ParticleMomentum	True	False	10	-30	Individual_Deep_Q	1.0	simple_mlp	True	0.05	2500000	9	True	IndivQLearningParticleDNN/209_20_9_slugs_decentralized	slugs_decentralized	shields/momentum_shield	0.05
IndivQLearningParticleDNN/209_20_9	none		True	-10	False	ParticleMomentum	True	False	10	-30	Individual_Deep_Q	1.0	simple_mlp	True	0.05	2500000	9	True	IndivQLearningParticleDNN/209_20_9_none	none		0.05
IndivQLearningParticleDNN/210_21_0	none		True	-10	False	ParticleMomentum	True	False	10	-30	Individual_Deep_Q	1.0	simple_mlp	False	0.05	2500000	0	True	IndivQLearningParticleDNN/210_21_0_slugs_centralized	slugs_centralized	shields/momentum_shield	0.05
IndivQLearningParticleDNN/210_21_0	none		True	-10	False	ParticleMomentum	True	False	10	-30	Individual_Deep_Q	1.0	simple_mlp	False	0.05	2500000	0	True	IndivQLearningParticleDNN/210_21_0_slugs_decentralized	slugs_decentralized	shields/momentum_shield	0.05
IndivQLearningParticleDNN/210_21_0	none		True	-10	False	ParticleMomentum	True	False	10	-30	Individual_Deep_Q	1.0	simple_mlp	False	0.05	2500000	0	True	IndivQLearningParticleDNN/210_21_0_none	none		0.05
IndivQLearningParticleDNN/211_21_1	none		True	-10	False	ParticleMomentum	True	False	10	-30	Individual_Deep_Q	1.0	simple_mlp	False	0.05	2500000	1	True	IndivQLearningParticleDNN/211_21_1_slugs_centralized	slugs_centralized	shields/momentum_shield	0.05
IndivQLearningParticleDNN/211_21_1	none		True	-10	False	ParticleMomentum	True	False	10	-30	Individual_Deep_Q	1.0	simple_mlp	False	0.05	2500000	1	True	IndivQLearningParticleDNN/211_21_1_slugs_decentralized	slugs_decentralized	shields/momentum_shield	0.05
IndivQLearningParticleDNN/211_21_1	none		True	-10	False	ParticleMomentum	True	False	10	-30	Individual_Deep_Q	1.0	simple_mlp	False	0.05	2500000	1	True	IndivQLearningParticleDNN/211_21_1_none	none		0.05
IndivQLearningParticleDNN/212_21_2	none		True	-10	False	ParticleMomentum	True	False	10	-30	Individual_Deep_Q	1.0	simple_mlp	False	0.05	2500000	2	True	IndivQLearningParticleDNN/212_21_2_slugs_centralized	slugs_centralized	shields/momentum_shield	0.05
IndivQLearningParticleDNN/212_21_2	none		True	-10	False	ParticleMomentum	True	False	10	-30	Individual_Deep_Q	1.0	simple_mlp	False	0.05	2500000	2	True	IndivQLearningParticleDNN/212_21_2_slugs_decentralized	slugs_decentralized	shields/momentum_shield	0.05
IndivQLearningParticleDNN/212_21_2	none		True	-10	False	ParticleMomentum	True	False	10	-30	Individual_Deep_Q	1.0	simple_mlp	False	0.05	2500000	2	True	IndivQLearningParticleDNN/212_21_2_none	none		0.05
IndivQLearningParticleDNN/213_21_3	none		True	-10	False	ParticleMomentum	True	False	10	-30	Individual_Deep_Q	1.0	simple_mlp	False	0.05	2500000	3	True	IndivQLearningParticleDNN/213_21_3_slugs_centralized	slugs_centralized	shields/momentum_shield	0.05
IndivQLearningParticleDNN/213_21_3	none		True	-10	False	ParticleMomentum	True	False	10	-30	Individual_Deep_Q	1.0	simple_mlp	False	0.05	2500000	3	True	IndivQLearningParticleDNN/213_21_3_slugs_decentralized	slugs_decentralized	shields/momentum_shield	0.05
IndivQLearningParticleDNN/213_21_3	none		True	-10	False	ParticleMomentum	True	False	10	-30	Individual_Deep_Q	1.0	simple_mlp	False	0.05	2500000	3	True	IndivQLearningParticleDNN/213_21_3_none	none		0.05
IndivQLearningParticleDNN/214_21_4	none		True	-10	False	ParticleMomentum	True	False	10	-30	Individual_Deep_Q	1.0	simple_mlp	False	0.05	2500000	4	True	IndivQLearningParticleDNN/214_21_4_slugs_centralized	slugs_centralized	shields/momentum_shield	0.05
IndivQLearningParticleDNN/214_21_4	none		True	-10	False	ParticleMomentum	True	False	10	-30	Individual_Deep_Q	1.0	simple_mlp	False	0.05	2500000	4	True	IndivQLearningParticleDNN/214_21_4_slugs_decentralized	slugs_decentralized	shields/momentum_shield	0.05
IndivQLearningParticleDNN/214_21_4	none		True	-10	False	ParticleMomentum	True	False	10	-30	Individual_Deep_Q	1.0	simple_mlp	False	0.05	2500000	4	True	IndivQLearningParticleDNN/214_21_4_none	none		0.05
IndivQLearningParticleDNN/215_21_5	none		True	-10	False	ParticleMomentum	True	False	10	-30	Individual_Deep_Q	1.0	simple_mlp	False	0.05	2500000	5	True	IndivQLearningParticleDNN/215_21_5_slugs_centralized	slugs_centralized	shields/momentum_shield	0.05
IndivQLearningParticleDNN/215_21_5	none		True	-10	False	ParticleMomentum	True	False	10	-30	Individual_Deep_Q	1.0	simple_mlp	False	0.05	2500000	5	True	IndivQLearningParticleDNN/215_21_5_slugs_decentralized	slugs_decentralized	shields/momentum_shield	0.05
IndivQLearningParticleDNN/215_21_5	none		True	-10	False	ParticleMomentum	True	False	10	-30	Individual_Deep_Q	1.0	simple_mlp	False	0.05	2500000	5	True	IndivQLearningParticleDNN/215_21_5_none	none		0.05
IndivQLearningParticleDNN/216_21_6	none		True	-10	False	ParticleMomentum	True	False	10	-30	Individual_Deep_Q	1.0	simple_mlp	False	0.05	2500000	6	True	IndivQLearningParticleDNN/216_21_6_slugs_centralized	slugs_centralized	shields/momentum_shield	0.05
IndivQLearningParticleDNN/216_21_6	none		True	-10	False	ParticleMomentum	True	False	10	-30	Individual_Deep_Q	1.0	simple_mlp	False	0.05	2500000	6	True	IndivQLearningParticleDNN/216_21_6_slugs_decentralized	slugs_decentralized	shields/momentum_shield	0.05
IndivQLearningParticleDNN/216_21_6	none		True	-10	False	ParticleMomentum	True	False	10	-30	Individual_Deep_Q	1.0	simple_mlp	False	0.05	2500000	6	True	IndivQLearningParticleDNN/216_21_6_none	none		0.05
IndivQLearningParticleDNN/217_21_7	none		True	-10	False	ParticleMomentum	True	False	10	-30	Individual_Deep_Q	1.0	simple_mlp	False	0.05	2500000	7	True	IndivQLearningParticleDNN/217_21_7_slugs_centralized	slugs_centralized	shields/momentum_shield	0.05
IndivQLearningParticleDNN/217_21_7	none		True	-10	False	ParticleMomentum	True	False	10	-30	Individual_Deep_Q	1.0	simple_mlp	False	0.05	2500000	7	True	IndivQLearningParticleDNN/217_21_7_slugs_decentralized	slugs_decentralized	shields/momentum_shield	0.05
IndivQLearningParticleDNN/217_21_7	none		True	-10	False	ParticleMomentum	True	False	10	-30	Individual_Deep_Q	1.0	simple_mlp	False	0.05	2500000	7	True	IndivQLearningParticleDNN/217_21_7_none	none		0.05
IndivQLearningParticleDNN/218_21_8	none		True	-10	False	ParticleMomentum	True	False	10	-30	Individual_Deep_Q	1.0	simple_mlp	False	0.05	2500000	8	True	IndivQLearningParticleDNN/218_21_8_slugs_centralized	slugs_centralized	shields/momentum_shield	0.05
IndivQLearningParticleDNN/218_21_8	none		True	-10	False	ParticleMomentum	True	False	10	-30	Individual_Deep_Q	1.0	simple_mlp	False	0.05	2500000	8	True	IndivQLearningParticleDNN/218_21_8_slugs_decentralized	slugs_decentralized	shields/momentum_shield	0.05
IndivQLearningParticleDNN/218_21_8	none		True	-10	False	ParticleMomentum	True	False	10	-30	Individual_Deep_Q	1.0	simple_mlp	False	0.05	2500000	8	True	IndivQLearningParticleDNN/218_21_8_none	none		0.05
IndivQLearningParticleDNN/219_21_9	none		True	-10	False	ParticleMomentum	True	False	10	-30	Individual_Deep_Q	1.0	simple_mlp	False	0.05	2500000	9	True	IndivQLearningParticleDNN/219_21_9_slugs_centralized	slugs_centralized	shields/momentum_shield	0.05
IndivQLearningParticleDNN/219_21_9	none		True	-10	False	ParticleMomentum	True	False	10	-30	Individual_Deep_Q	1.0	simple_mlp	False	0.05	2500000	9	True	IndivQLearningParticleDNN/219_21_9_slugs_decentralized	slugs_decentralized	shields/momentum_shield	0.05
IndivQLearningParticleDNN/219_21_9	none		True	-10	False	ParticleMomentum	True	False	10	-30	Individual_Deep_Q	1.0	simple_mlp	False	0.05	2500000	9	True	IndivQLearningParticleDNN/219_21_9_none	none		0.05
IndivQLearningParticleDNN/220_22_0	none		True	-10	False	ParticleMomentum	False	False	10	-30	Individual_Deep_Q	1.0	simple_mlp	True	0.05	2500000	0	True	IndivQLearningParticleDNN/220_22_0_slugs_centralized	slugs_centralized	shields/momentum_shield	0.05
IndivQLearningParticleDNN/220_22_0	none		True	-10	False	ParticleMomentum	False	False	10	-30	Individual_Deep_Q	1.0	simple_mlp	True	0.05	2500000	0	True	IndivQLearningParticleDNN/220_22_0_slugs_decentralized	slugs_decentralized	shields/momentum_shield	0.05
IndivQLearningParticleDNN/220_22_0	none		True	-10	False	ParticleMomentum	False	False	10	-30	Individual_Deep_Q	1.0	simple_mlp	True	0.05	2500000	0	True	IndivQLearningParticleDNN/220_22_0_none	none		0.05
IndivQLearningParticleDNN/221_22_1	none		True	-10	False	ParticleMomentum	False	False	10	-30	Individual_Deep_Q	1.0	simple_mlp	True	0.05	2500000	1	True	IndivQLearningParticleDNN/221_22_1_slugs_centralized	slugs_centralized	shields/momentum_shield	0.05
IndivQLearningParticleDNN/221_22_1	none		True	-10	False	ParticleMomentum	False	False	10	-30	Individual_Deep_Q	1.0	simple_mlp	True	0.05	2500000	1	True	IndivQLearningParticleDNN/221_22_1_slugs_decentralized	slugs_decentralized	shields/momentum_shield	0.05
IndivQLearningParticleDNN/221_22_1	none		True	-10	False	ParticleMomentum	False	False	10	-30	Individual_Deep_Q	1.0	simple_mlp	True	0.05	2500000	1	True	IndivQLearningParticleDNN/221_22_1_none	none		0.05
IndivQLearningParticleDNN/222_22_2	none		True	-10	False	ParticleMomentum	False	False	10	-30	Individual_Deep_Q	1.0	simple_mlp	True	0.05	2500000	2	True	IndivQLearningParticleDNN/222_22_2_slugs_centralized	slugs_centralized	shields/momentum_shield	0.05
IndivQLearningParticleDNN/222_22_2	none		True	-10	False	ParticleMomentum	False	False	10	-30	Individual_Deep_Q	1.0	simple_mlp	True	0.05	2500000	2	True	IndivQLearningParticleDNN/222_22_2_slugs_decentralized	slugs_decentralized	shields/momentum_shield	0.05
IndivQLearningParticleDNN/222_22_2	none		True	-10	False	ParticleMomentum	False	False	10	-30	Individual_Deep_Q	1.0	simple_mlp	True	0.05	2500000	2	True	IndivQLearningParticleDNN/222_22_2_none	none		0.05
IndivQLearningParticleDNN/223_22_3	none		True	-10	False	ParticleMomentum	False	False	10	-30	Individual_Deep_Q	1.0	simple_mlp	True	0.05	2500000	3	True	IndivQLearningParticleDNN/223_22_3_slugs_centralized	slugs_centralized	shields/momentum_shield	0.05
IndivQLearningParticleDNN/223_22_3	none		True	-10	False	ParticleMomentum	False	False	10	-30	Individual_Deep_Q	1.0	simple_mlp	True	0.05	2500000	3	True	IndivQLearningParticleDNN/223_22_3_slugs_decentralized	slugs_decentralized	shields/momentum_shield	0.05
IndivQLearningParticleDNN/223_22_3	none		True	-10	False	ParticleMomentum	False	False	10	-30	Individual_Deep_Q	1.0	simple_mlp	True	0.05	2500000	3	True	IndivQLearningParticleDNN/223_22_3_none	none		0.05
IndivQLearningParticleDNN/224_22_4	none		True	-10	False	ParticleMomentum	False	False	10	-30	Individual_Deep_Q	1.0	simple_mlp	True	0.05	2500000	4	True	IndivQLearningParticleDNN/224_22_4_slugs_centralized	slugs_centralized	shields/momentum_shield	0.05
IndivQLearningParticleDNN/224_22_4	none		True	-10	False	ParticleMomentum	False	False	10	-30	Individual_Deep_Q	1.0	simple_mlp	True	0.05	2500000	4	True	IndivQLearningParticleDNN/224_22_4_slugs_decentralized	slugs_decentralized	shields/momentum_shield	0.05
IndivQLearningParticleDNN/224_22_4	none		True	-10	False	ParticleMomentum	False	False	10	-30	Individual_Deep_Q	1.0	simple_mlp	True	0.05	2500000	4	True	IndivQLearningParticleDNN/224_22_4_none	none		0.05
IndivQLearningParticleDNN/225_22_5	none		True	-10	False	ParticleMomentum	False	False	10	-30	Individual_Deep_Q	1.0	simple_mlp	True	0.05	2500000	5	True	IndivQLearningParticleDNN/225_22_5_slugs_centralized	slugs_centralized	shields/momentum_shield	0.05
IndivQLearningParticleDNN/225_22_5	none		True	-10	False	ParticleMomentum	False	False	10	-30	Individual_Deep_Q	1.0	simple_mlp	True	0.05	2500000	5	True	IndivQLearningParticleDNN/225_22_5_slugs_decentralized	slugs_decentralized	shields/momentum_shield	0.05
IndivQLearningParticleDNN/225_22_5	none		True	-10	False	ParticleMomentum	False	False	10	-30	Individual_Deep_Q	1.0	simple_mlp	True	0.05	2500000	5	True	IndivQLearningParticleDNN/225_22_5_none	none		0.05
IndivQLearningParticleDNN/226_22_6	none		True	-10	False	ParticleMomentum	False	False	10	-30	Individual_Deep_Q	1.0	simple_mlp	True	0.05	2500000	6	True	IndivQLearningParticleDNN/226_22_6_slugs_centralized	slugs_centralized	shields/momentum_shield	0.05
IndivQLearningParticleDNN/226_22_6	none		True	-10	False	ParticleMomentum	False	False	10	-30	Individual_Deep_Q	1.0	simple_mlp	True	0.05	2500000	6	True	IndivQLearningParticleDNN/226_22_6_slugs_decentralized	slugs_decentralized	shields/momentum_shield	0.05
IndivQLearningParticleDNN/226_22_6	none		True	-10	False	ParticleMomentum	False	False	10	-30	Individual_Deep_Q	1.0	simple_mlp	True	0.05	2500000	6	True	IndivQLearningParticleDNN/226_22_6_none	none		0.05
IndivQLearningParticleDNN/227_22_7	none		True	-10	False	ParticleMomentum	False	False	10	-30	Individual_Deep_Q	1.0	simple_mlp	True	0.05	2500000	7	True	IndivQLearningParticleDNN/227_22_7_slugs_centralized	slugs_centralized	shields/momentum_shield	0.05
IndivQLearningParticleDNN/227_22_7	none		True	-10	False	ParticleMomentum	False	False	10	-30	Individual_Deep_Q	1.0	simple_mlp	True	0.05	2500000	7	True	IndivQLearningParticleDNN/227_22_7_slugs_decentralized	slugs_decentralized	shields/momentum_shield	0.05
IndivQLearningParticleDNN/227_22_7	none		True	-10	False	ParticleMomentum	False	False	10	-30	Individual_Deep_Q	1.0	simple_mlp	True	0.05	2500000	7	True	IndivQLearningParticleDNN/227_22_7_none	none		0.05
IndivQLearningParticleDNN/228_22_8	none		True	-10	False	ParticleMomentum	False	False	10	-30	Individual_Deep_Q	1.0	simple_mlp	True	0.05	2500000	8	True	IndivQLearningParticleDNN/228_22_8_slugs_centralized	slugs_centralized	shields/momentum_shield	0.05
IndivQLearningParticleDNN/228_22_8	none		True	-10	False	ParticleMomentum	False	False	10	-30	Individual_Deep_Q	1.0	simple_mlp	True	0.05	2500000	8	True	IndivQLearningParticleDNN/228_22_8_slugs_decentralized	slugs_decentralized	shields/momentum_shield	0.05
IndivQLearningParticleDNN/228_22_8	none		True	-10	False	ParticleMomentum	False	False	10	-30	Individual_Deep_Q	1.0	simple_mlp	True	0.05	2500000	8	True	IndivQLearningParticleDNN/228_22_8_none	none		0.05
IndivQLearningParticleDNN/229_22_9	none		True	-10	False	ParticleMomentum	False	False	10	-30	Individual_Deep_Q	1.0	simple_mlp	True	0.05	2500000	9	True	IndivQLearningParticleDNN/229_22_9_slugs_centralized	slugs_centralized	shields/momentum_shield	0.05
IndivQLearningParticleDNN/229_22_9	none		True	-10	False	ParticleMomentum	False	False	10	-30	Individual_Deep_Q	1.0	simple_mlp	True	0.05	2500000	9	True	IndivQLearningParticleDNN/229_22_9_slugs_decentralized	slugs_decentralized	shields/momentum_shield	0.05
IndivQLearningParticleDNN/229_22_9	none		True	-10	False	ParticleMomentum	False	False	10	-30	Individual_Deep_Q	1.0	simple_mlp	True	0.05	2500000	9	True	IndivQLearningParticleDNN/229_22_9_none	none		0.05
IndivQLearningParticleDNN/230_23_0	none		True	-10	False	ParticleMomentum	False	False	10	-30	Individual_Deep_Q	1.0	simple_mlp	False	0.05	2500000	0	True	IndivQLearningParticleDNN/230_23_0_slugs_centralized	slugs_centralized	shields/momentum_shield	0.05
IndivQLearningParticleDNN/230_23_0	none		True	-10	False	ParticleMomentum	False	False	10	-30	Individual_Deep_Q	1.0	simple_mlp	False	0.05	2500000	0	True	IndivQLearningParticleDNN/230_23_0_slugs_decentralized	slugs_decentralized	shields/momentum_shield	0.05
IndivQLearningParticleDNN/230_23_0	none		True	-10	False	ParticleMomentum	False	False	10	-30	Individual_Deep_Q	1.0	simple_mlp	False	0.05	2500000	0	True	IndivQLearningParticleDNN/230_23_0_none	none		0.05
IndivQLearningParticleDNN/231_23_1	none		True	-10	False	ParticleMomentum	False	False	10	-30	Individual_Deep_Q	1.0	simple_mlp	False	0.05	2500000	1	True	IndivQLearningParticleDNN/231_23_1_slugs_centralized	slugs_centralized	shields/momentum_shield	0.05
IndivQLearningParticleDNN/231_23_1	none		True	-10	False	ParticleMomentum	False	False	10	-30	Individual_Deep_Q	1.0	simple_mlp	False	0.05	2500000	1	True	IndivQLearningParticleDNN/231_23_1_slugs_decentralized	slugs_decentralized	shields/momentum_shield	0.05
IndivQLearningParticleDNN/231_23_1	none		True	-10	False	ParticleMomentum	False	False	10	-30	Individual_Deep_Q	1.0	simple_mlp	False	0.05	2500000	1	True	IndivQLearningParticleDNN/231_23_1_none	none		0.05
IndivQLearningParticleDNN/232_23_2	none		True	-10	False	ParticleMomentum	False	False	10	-30	Individual_Deep_Q	1.0	simple_mlp	False	0.05	2500000	2	True	IndivQLearningParticleDNN/232_23_2_slugs_centralized	slugs_centralized	shields/momentum_shield	0.05
IndivQLearningParticleDNN/232_23_2	none		True	-10	False	ParticleMomentum	False	False	10	-30	Individual_Deep_Q	1.0	simple_mlp	False	0.05	2500000	2	True	IndivQLearningParticleDNN/232_23_2_slugs_decentralized	slugs_decentralized	shields/momentum_shield	0.05
IndivQLearningParticleDNN/232_23_2	none		True	-10	False	ParticleMomentum	False	False	10	-30	Individual_Deep_Q	1.0	simple_mlp	False	0.05	2500000	2	True	IndivQLearningParticleDNN/232_23_2_none	none		0.05
IndivQLearningParticleDNN/233_23_3	none		True	-10	False	ParticleMomentum	False	False	10	-30	Individual_Deep_Q	1.0	simple_mlp	False	0.05	2500000	3	True	IndivQLearningParticleDNN/233_23_3_slugs_centralized	slugs_centralized	shields/momentum_shield	0.05
IndivQLearningParticleDNN/233_23_3	none		True	-10	False	ParticleMomentum	False	False	10	-30	Individual_Deep_Q	1.0	simple_mlp	False	0.05	2500000	3	True	IndivQLearningParticleDNN/233_23_3_slugs_decentralized	slugs_decentralized	shields/momentum_shield	0.05
IndivQLearningParticleDNN/233_23_3	none		True	-10	False	ParticleMomentum	False	False	10	-30	Individual_Deep_Q	1.0	simple_mlp	False	0.05	2500000	3	True	IndivQLearningParticleDNN/233_23_3_none	none		0.05
IndivQLearningParticleDNN/234_23_4	none		True	-10	False	ParticleMomentum	False	False	10	-30	Individual_Deep_Q	1.0	simple_mlp	False	0.05	2500000	4	True	IndivQLearningParticleDNN/234_23_4_slugs_centralized	slugs_centralized	shields/momentum_shield	0.05
IndivQLearningParticleDNN/234_23_4	none		True	-10	False	ParticleMomentum	False	False	10	-30	Individual_Deep_Q	1.0	simple_mlp	False	0.05	2500000	4	True	IndivQLearningParticleDNN/234_23_4_slugs_decentralized	slugs_decentralized	shields/momentum_shield	0.05
IndivQLearningParticleDNN/234_23_4	none		True	-10	False	ParticleMomentum	False	False	10	-30	Individual_Deep_Q	1.0	simple_mlp	False	0.05	2500000	4	True	IndivQLearningParticleDNN/234_23_4_none	none		0.05
IndivQLearningParticleDNN/235_23_5	none		True	-10	False	ParticleMomentum	False	False	10	-30	Individual_Deep_Q	1.0	simple_mlp	False	0.05	2500000	5	True	IndivQLearningParticleDNN/235_23_5_slugs_centralized	slugs_centralized	shields/momentum_shield	0.05
IndivQLearningParticleDNN/235_23_5	none		True	-10	False	ParticleMomentum	False	False	10	-30	Individual_Deep_Q	1.0	simple_mlp	False	0.05	2500000	5	True	IndivQLearningParticleDNN/235_23_5_slugs_decentralized	slugs_decentralized	shields/momentum_shield	0.05
IndivQLearningParticleDNN/235_23_5	none		True	-10	False	ParticleMomentum	False	False	10	-30	Individual_Deep_Q	1.0	simple_mlp	False	0.05	2500000	5	True	IndivQLearningParticleDNN/235_23_5_none	none		0.05
IndivQLearningParticleDNN/236_23_6	none		True	-10	False	ParticleMomentum	False	False	10	-30	Individual_Deep_Q	1.0	simple_mlp	False	0.05	2500000	6	True	IndivQLearningParticleDNN/236_23_6_slugs_centralized	slugs_centralized	shields/momentum_shield	0.05
IndivQLearningParticleDNN/236_23_6	none		True	-10	False	ParticleMomentum	False	False	10	-30	Individual_Deep_Q	1.0	simple_mlp	False	0.05	2500000	6	True	IndivQLearningParticleDNN/236_23_6_slugs_decentralized	slugs_decentralized	shields/momentum_shield	0.05
IndivQLearningParticleDNN/236_23_6	none		True	-10	False	ParticleMomentum	False	False	10	-30	Individual_Deep_Q	1.0	simple_mlp	False	0.05	2500000	6	True	IndivQLearningParticleDNN/236_23_6_none	none		0.05
IndivQLearningParticleDNN/237_23_7	none		True	-10	False	ParticleMomentum	False	False	10	-30	Individual_Deep_Q	1.0	simple_mlp	False	0.05	2500000	7	True	IndivQLearningParticleDNN/237_23_7_slugs_centralized	slugs_centralized	shields/momentum_shield	0.05
IndivQLearningParticleDNN/237_23_7	none		True	-10	False	ParticleMomentum	False	False	10	-30	Individual_Deep_Q	1.0	simple_mlp	False	0.05	2500000	7	True	IndivQLearningParticleDNN/237_23_7_slugs_decentralized	slugs_decentralized	shields/momentum_shield	0.05
IndivQLearningParticleDNN/237_23_7	none		True	-10	False	ParticleMomentum	False	False	10	-30	Individual_Deep_Q	1.0	simple_mlp	False	0.05	2500000	7	True	IndivQLearningParticleDNN/237_23_7_none	none		0.05
IndivQLearningParticleDNN/238_23_8	none		True	-10	False	ParticleMomentum	False	False	10	-30	Individual_Deep_Q	1.0	simple_mlp	False	0.05	2500000	8	True	IndivQLearningParticleDNN/238_23_8_slugs_centralized	slugs_centralized	shields/momentum_shield	0.05
IndivQLearningParticleDNN/238_23_8	none		True	-10	False	ParticleMomentum	False	False	10	-30	Individual_Deep_Q	1.0	simple_mlp	False	0.05	2500000	8	True	IndivQLearningParticleDNN/238_23_8_slugs_decentralized	slugs_decentralized	shields/momentum_shield	0.05
IndivQLearningParticleDNN/238_23_8	none		True	-10	False	ParticleMomentum	False	False	10	-30	Individual_Deep_Q	1.0	simple_mlp	False	0.05	2500000	8	True	IndivQLearningParticleDNN/238_23_8_none	none		0.05
IndivQLearningParticleDNN/239_23_9	none		True	-10	False	ParticleMomentum	False	False	10	-30	Individual_Deep_Q	1.0	simple_mlp	False	0.05	2500000	9	True	IndivQLearningParticleDNN/239_23_9_slugs_centralized	slugs_centralized	shields/momentum_shield	0.05
IndivQLearningParticleDNN/239_23_9	none		True	-10	False	ParticleMomentum	False	False	10	-30	Individual_Deep_Q	1.0	simple_mlp	False	0.05	2500000	9	True	IndivQLearningParticleDNN/239_23_9_slugs_decentralized	slugs_decentralized	shields/momentum_shield	0.05
IndivQLearningParticleDNN/239_23_9	none		True	-10	False	ParticleMomentum	False	False	10	-30	Individual_Deep_Q	1.0	simple_mlp	False	0.05	2500000	9	True	IndivQLearningParticleDNN/239_23_9_none	none		0.05
