# Supplementary material
Source: ML conference proceedings conference paper supplement (https://proceedings.neurips.cc/paper_files/paper/2022/hash/57444e14ecd9e2c8f603b4f012ce3811-Abstract.html)
Supplement: Supplementary file 1 [file 57444e14ecd9e2c8f603b4f012ce3811-Supplemental-Conference.zip › 3410_shield_decentralization_for_sa-Supplementary Material/parallel_configs/IndivQLearningParticleDNNOnlyOneHotMoreSeeds2Eval.csv]

run_name	shield	shield_specification	punish_unsafe_orig_action	punish_unsafe_orig_action_modifier	randomize_starts	map_type	particle_agents_observe_momentum	particle_terminate_on_collision	particle_world_size	particle_collision_penalty	learner_type	learner_anneal_eps_start	learner_deep_network_model	learner_transform_one_hot	learner_anneal_eps_finish	max_total_steps	seed	skip_training	evaluation_run_name	evaluation_shield	evaluation_shield_specification	learner_evaluation_epsilon
IndivQLearningParticleDNNOnlyOneHotMoreSeeds2/0_0_0	slugs_centralized	shields/momentum_shield	True	-10	True	ParticleMomentum	False	False	10	-30	Individual_Deep_Q	1.0	simple_mlp	True	0.05	2500000	10	True	IndivQLearningParticleDNNOnlyOneHotMoreSeeds2/0_0_0_slugs_centralized	slugs_centralized	shields/momentum_shield	0.05
IndivQLearningParticleDNNOnlyOneHotMoreSeeds2/0_0_0	slugs_centralized	shields/momentum_shield	True	-10	True	ParticleMomentum	False	False	10	-30	Individual_Deep_Q	1.0	simple_mlp	True	0.05	2500000	10	True	IndivQLearningParticleDNNOnlyOneHotMoreSeeds2/0_0_0_slugs_decentralized	slugs_decentralized	shields/momentum_shield	0.05
IndivQLearningParticleDNNOnlyOneHotMoreSeeds2/0_0_0	slugs_centralized	shields/momentum_shield	True	-10	True	ParticleMomentum	False	False	10	-30	Individual_Deep_Q	1.0	simple_mlp	True	0.05	2500000	10	True	IndivQLearningParticleDNNOnlyOneHotMoreSeeds2/0_0_0_none	none		0.05
IndivQLearningParticleDNNOnlyOneHotMoreSeeds2/1_0_1	slugs_centralized	shields/momentum_shield	True	-10	True	ParticleMomentum	False	False	10	-30	Individual_Deep_Q	1.0	simple_mlp	True	0.05	2500000	11	True	IndivQLearningParticleDNNOnlyOneHotMoreSeeds2/1_0_1_slugs_centralized	slugs_centralized	shields/momentum_shield	0.05
IndivQLearningParticleDNNOnlyOneHotMoreSeeds2/1_0_1	slugs_centralized	shields/momentum_shield	True	-10	True	ParticleMomentum	False	False	10	-30	Individual_Deep_Q	1.0	simple_mlp	True	0.05	2500000	11	True	IndivQLearningParticleDNNOnlyOneHotMoreSeeds2/1_0_1_slugs_decentralized	slugs_decentralized	shields/momentum_shield	0.05
IndivQLearningParticleDNNOnlyOneHotMoreSeeds2/1_0_1	slugs_centralized	shields/momentum_shield	True	-10	True	ParticleMomentum	False	False	10	-30	Individual_Deep_Q	1.0	simple_mlp	True	0.05	2500000	11	True	IndivQLearningParticleDNNOnlyOneHotMoreSeeds2/1_0_1_none	none		0.05
IndivQLearningParticleDNNOnlyOneHotMoreSeeds2/2_0_2	slugs_centralized	shields/momentum_shield	True	-10	True	ParticleMomentum	False	False	10	-30	Individual_Deep_Q	1.0	simple_mlp	True	0.05	2500000	12	True	IndivQLearningParticleDNNOnlyOneHotMoreSeeds2/2_0_2_slugs_centralized	slugs_centralized	shields/momentum_shield	0.05
IndivQLearningParticleDNNOnlyOneHotMoreSeeds2/2_0_2	slugs_centralized	shields/momentum_shield	True	-10	True	ParticleMomentum	False	False	10	-30	Individual_Deep_Q	1.0	simple_mlp	True	0.05	2500000	12	True	IndivQLearningParticleDNNOnlyOneHotMoreSeeds2/2_0_2_slugs_decentralized	slugs_decentralized	shields/momentum_shield	0.05
IndivQLearningParticleDNNOnlyOneHotMoreSeeds2/2_0_2	slugs_centralized	shields/momentum_shield	True	-10	True	ParticleMomentum	False	False	10	-30	Individual_Deep_Q	1.0	simple_mlp	True	0.05	2500000	12	True	IndivQLearningParticleDNNOnlyOneHotMoreSeeds2/2_0_2_none	none		0.05
IndivQLearningParticleDNNOnlyOneHotMoreSeeds2/3_0_3	slugs_centralized	shields/momentum_shield	True	-10	True	ParticleMomentum	False	False	10	-30	Individual_Deep_Q	1.0	simple_mlp	True	0.05	2500000	13	True	IndivQLearningParticleDNNOnlyOneHotMoreSeeds2/3_0_3_slugs_centralized	slugs_centralized	shields/momentum_shield	0.05
IndivQLearningParticleDNNOnlyOneHotMoreSeeds2/3_0_3	slugs_centralized	shields/momentum_shield	True	-10	True	ParticleMomentum	False	False	10	-30	Individual_Deep_Q	1.0	simple_mlp	True	0.05	2500000	13	True	IndivQLearningParticleDNNOnlyOneHotMoreSeeds2/3_0_3_slugs_decentralized	slugs_decentralized	shields/momentum_shield	0.05
IndivQLearningParticleDNNOnlyOneHotMoreSeeds2/3_0_3	slugs_centralized	shields/momentum_shield	True	-10	True	ParticleMomentum	False	False	10	-30	Individual_Deep_Q	1.0	simple_mlp	True	0.05	2500000	13	True	IndivQLearningParticleDNNOnlyOneHotMoreSeeds2/3_0_3_none	none		0.05
IndivQLearningParticleDNNOnlyOneHotMoreSeeds2/4_0_4	slugs_centralized	shields/momentum_shield	True	-10	True	ParticleMomentum	False	False	10	-30	Individual_Deep_Q	1.0	simple_mlp	True	0.05	2500000	14	True	IndivQLearningParticleDNNOnlyOneHotMoreSeeds2/4_0_4_slugs_centralized	slugs_centralized	shields/momentum_shield	0.05
IndivQLearningParticleDNNOnlyOneHotMoreSeeds2/4_0_4	slugs_centralized	shields/momentum_shield	True	-10	True	ParticleMomentum	False	False	10	-30	Individual_Deep_Q	1.0	simple_mlp	True	0.05	2500000	14	True	IndivQLearningParticleDNNOnlyOneHotMoreSeeds2/4_0_4_slugs_decentralized	slugs_decentralized	shields/momentum_shield	0.05
IndivQLearningParticleDNNOnlyOneHotMoreSeeds2/4_0_4	slugs_centralized	shields/momentum_shield	True	-10	True	ParticleMomentum	False	False	10	-30	Individual_Deep_Q	1.0	simple_mlp	True	0.05	2500000	14	True	IndivQLearningParticleDNNOnlyOneHotMoreSeeds2/4_0_4_none	none		0.05
IndivQLearningParticleDNNOnlyOneHotMoreSeeds2/5_0_5	slugs_centralized	shields/momentum_shield	True	-10	True	ParticleMomentum	False	False	10	-30	Individual_Deep_Q	1.0	simple_mlp	True	0.05	2500000	15	True	IndivQLearningParticleDNNOnlyOneHotMoreSeeds2/5_0_5_slugs_centralized	slugs_centralized	shields/momentum_shield	0.05
IndivQLearningParticleDNNOnlyOneHotMoreSeeds2/5_0_5	slugs_centralized	shields/momentum_shield	True	-10	True	ParticleMomentum	False	False	10	-30	Individual_Deep_Q	1.0	simple_mlp	True	0.05	2500000	15	True	IndivQLearningParticleDNNOnlyOneHotMoreSeeds2/5_0_5_slugs_decentralized	slugs_decentralized	shields/momentum_shield	0.05
IndivQLearningParticleDNNOnlyOneHotMoreSeeds2/5_0_5	slugs_centralized	shields/momentum_shield	True	-10	True	ParticleMomentum	False	False	10	-30	Individual_Deep_Q	1.0	simple_mlp	True	0.05	2500000	15	True	IndivQLearningParticleDNNOnlyOneHotMoreSeeds2/5_0_5_none	none		0.05
IndivQLearningParticleDNNOnlyOneHotMoreSeeds2/6_0_6	slugs_centralized	shields/momentum_shield	True	-10	True	ParticleMomentum	False	False	10	-30	Individual_Deep_Q	1.0	simple_mlp	True	0.05	2500000	16	True	IndivQLearningParticleDNNOnlyOneHotMoreSeeds2/6_0_6_slugs_centralized	slugs_centralized	shields/momentum_shield	0.05
IndivQLearningParticleDNNOnlyOneHotMoreSeeds2/6_0_6	slugs_centralized	shields/momentum_shield	True	-10	True	ParticleMomentum	False	False	10	-30	Individual_Deep_Q	1.0	simple_mlp	True	0.05	2500000	16	True	IndivQLearningParticleDNNOnlyOneHotMoreSeeds2/6_0_6_slugs_decentralized	slugs_decentralized	shields/momentum_shield	0.05
IndivQLearningParticleDNNOnlyOneHotMoreSeeds2/6_0_6	slugs_centralized	shields/momentum_shield	True	-10	True	ParticleMomentum	False	False	10	-30	Individual_Deep_Q	1.0	simple_mlp	True	0.05	2500000	16	True	IndivQLearningParticleDNNOnlyOneHotMoreSeeds2/6_0_6_none	none		0.05
IndivQLearningParticleDNNOnlyOneHotMoreSeeds2/7_0_7	slugs_centralized	shields/momentum_shield	True	-10	True	ParticleMomentum	False	False	10	-30	Individual_Deep_Q	1.0	simple_mlp	True	0.05	2500000	17	True	IndivQLearningParticleDNNOnlyOneHotMoreSeeds2/7_0_7_slugs_centralized	slugs_centralized	shields/momentum_shield	0.05
IndivQLearningParticleDNNOnlyOneHotMoreSeeds2/7_0_7	slugs_centralized	shields/momentum_shield	True	-10	True	ParticleMomentum	False	False	10	-30	Individual_Deep_Q	1.0	simple_mlp	True	0.05	2500000	17	True	IndivQLearningParticleDNNOnlyOneHotMoreSeeds2/7_0_7_slugs_decentralized	slugs_decentralized	shields/momentum_shield	0.05
IndivQLearningParticleDNNOnlyOneHotMoreSeeds2/7_0_7	slugs_centralized	shields/momentum_shield	True	-10	True	ParticleMomentum	False	False	10	-30	Individual_Deep_Q	1.0	simple_mlp	True	0.05	2500000	17	True	IndivQLearningParticleDNNOnlyOneHotMoreSeeds2/7_0_7_none	none		0.05
IndivQLearningParticleDNNOnlyOneHotMoreSeeds2/8_0_8	slugs_centralized	shields/momentum_shield	True	-10	True	ParticleMomentum	False	False	10	-30	Individual_Deep_Q	1.0	simple_mlp	True	0.05	2500000	18	True	IndivQLearningParticleDNNOnlyOneHotMoreSeeds2/8_0_8_slugs_centralized	slugs_centralized	shields/momentum_shield	0.05
IndivQLearningParticleDNNOnlyOneHotMoreSeeds2/8_0_8	slugs_centralized	shields/momentum_shield	True	-10	True	ParticleMomentum	False	False	10	-30	Individual_Deep_Q	1.0	simple_mlp	True	0.05	2500000	18	True	IndivQLearningParticleDNNOnlyOneHotMoreSeeds2/8_0_8_slugs_decentralized	slugs_decentralized	shields/momentum_shield	0.05
IndivQLearningParticleDNNOnlyOneHotMoreSeeds2/8_0_8	slugs_centralized	shields/momentum_shield	True	-10	True	ParticleMomentum	False	False	10	-30	Individual_Deep_Q	1.0	simple_mlp	True	0.05	2500000	18	True	IndivQLearningParticleDNNOnlyOneHotMoreSeeds2/8_0_8_none	none		0.05
IndivQLearningParticleDNNOnlyOneHotMoreSeeds2/9_0_9	slugs_centralized	shields/momentum_shield	True	-10	True	ParticleMomentum	False	False	10	-30	Individual_Deep_Q	1.0	simple_mlp	True	0.05	2500000	19	True	IndivQLearningParticleDNNOnlyOneHotMoreSeeds2/9_0_9_slugs_centralized	slugs_centralized	shields/momentum_shield	0.05
IndivQLearningParticleDNNOnlyOneHotMoreSeeds2/9_0_9	slugs_centralized	shields/momentum_shield	True	-10	True	ParticleMomentum	False	False	10	-30	Individual_Deep_Q	1.0	simple_mlp	True	0.05	2500000	19	True	IndivQLearningParticleDNNOnlyOneHotMoreSeeds2/9_0_9_slugs_decentralized	slugs_decentralized	shields/momentum_shield	0.05
IndivQLearningParticleDNNOnlyOneHotMoreSeeds2/9_0_9	slugs_centralized	shields/momentum_shield	True	-10	True	ParticleMomentum	False	False	10	-30	Individual_Deep_Q	1.0	simple_mlp	True	0.05	2500000	19	True	IndivQLearningParticleDNNOnlyOneHotMoreSeeds2/9_0_9_none	none		0.05
IndivQLearningParticleDNNOnlyOneHotMoreSeeds2/10_0_10	slugs_centralized	shields/momentum_shield	True	-10	True	ParticleMomentum	False	False	10	-30	Individual_Deep_Q	1.0	simple_mlp	True	0.05	2500000	20	True	IndivQLearningParticleDNNOnlyOneHotMoreSeeds2/10_0_10_slugs_centralized	slugs_centralized	shields/momentum_shield	0.05
IndivQLearningParticleDNNOnlyOneHotMoreSeeds2/10_0_10	slugs_centralized	shields/momentum_shield	True	-10	True	ParticleMomentum	False	False	10	-30	Individual_Deep_Q	1.0	simple_mlp	True	0.05	2500000	20	True	IndivQLearningParticleDNNOnlyOneHotMoreSeeds2/10_0_10_slugs_decentralized	slugs_decentralized	shields/momentum_shield	0.05
IndivQLearningParticleDNNOnlyOneHotMoreSeeds2/10_0_10	slugs_centralized	shields/momentum_shield	True	-10	True	ParticleMomentum	False	False	10	-30	Individual_Deep_Q	1.0	simple_mlp	True	0.05	2500000	20	True	IndivQLearningParticleDNNOnlyOneHotMoreSeeds2/10_0_10_none	none		0.05
IndivQLearningParticleDNNOnlyOneHotMoreSeeds2/11_0_11	slugs_centralized	shields/momentum_shield	True	-10	True	ParticleMomentum	False	False	10	-30	Individual_Deep_Q	1.0	simple_mlp	True	0.05	2500000	21	True	IndivQLearningParticleDNNOnlyOneHotMoreSeeds2/11_0_11_slugs_centralized	slugs_centralized	shields/momentum_shield	0.05
IndivQLearningParticleDNNOnlyOneHotMoreSeeds2/11_0_11	slugs_centralized	shields/momentum_shield	True	-10	True	ParticleMomentum	False	False	10	-30	Individual_Deep_Q	1.0	simple_mlp	True	0.05	2500000	21	True	IndivQLearningParticleDNNOnlyOneHotMoreSeeds2/11_0_11_slugs_decentralized	slugs_decentralized	shields/momentum_shield	0.05
IndivQLearningParticleDNNOnlyOneHotMoreSeeds2/11_0_11	slugs_centralized	shields/momentum_shield	True	-10	True	ParticleMomentum	False	False	10	-30	Individual_Deep_Q	1.0	simple_mlp	True	0.05	2500000	21	True	IndivQLearningParticleDNNOnlyOneHotMoreSeeds2/11_0_11_none	none		0.05
IndivQLearningParticleDNNOnlyOneHotMoreSeeds2/12_0_12	slugs_centralized	shields/momentum_shield	True	-10	True	ParticleMomentum	False	False	10	-30	Individual_Deep_Q	1.0	simple_mlp	True	0.05	2500000	22	True	IndivQLearningParticleDNNOnlyOneHotMoreSeeds2/12_0_12_slugs_centralized	slugs_centralized	shields/momentum_shield	0.05
IndivQLearningParticleDNNOnlyOneHotMoreSeeds2/12_0_12	slugs_centralized	shields/momentum_shield	True	-10	True	ParticleMomentum	False	False	10	-30	Individual_Deep_Q	1.0	simple_mlp	True	0.05	2500000	22	True	IndivQLearningParticleDNNOnlyOneHotMoreSeeds2/12_0_12_slugs_decentralized	slugs_decentralized	shields/momentum_shield	0.05
IndivQLearningParticleDNNOnlyOneHotMoreSeeds2/12_0_12	slugs_centralized	shields/momentum_shield	True	-10	True	ParticleMomentum	False	False	10	-30	Individual_Deep_Q	1.0	simple_mlp	True	0.05	2500000	22	True	IndivQLearningParticleDNNOnlyOneHotMoreSeeds2/12_0_12_none	none		0.05
IndivQLearningParticleDNNOnlyOneHotMoreSeeds2/13_0_13	slugs_centralized	shields/momentum_shield	True	-10	True	ParticleMomentum	False	False	10	-30	Individual_Deep_Q	1.0	simple_mlp	True	0.05	2500000	23	True	IndivQLearningParticleDNNOnlyOneHotMoreSeeds2/13_0_13_slugs_centralized	slugs_centralized	shields/momentum_shield	0.05
IndivQLearningParticleDNNOnlyOneHotMoreSeeds2/13_0_13	slugs_centralized	shields/momentum_shield	True	-10	True	ParticleMomentum	False	False	10	-30	Individual_Deep_Q	1.0	simple_mlp	True	0.05	2500000	23	True	IndivQLearningParticleDNNOnlyOneHotMoreSeeds2/13_0_13_slugs_decentralized	slugs_decentralized	shields/momentum_shield	0.05
IndivQLearningParticleDNNOnlyOneHotMoreSeeds2/13_0_13	slugs_centralized	shields/momentum_shield	True	-10	True	ParticleMomentum	False	False	10	-30	Individual_Deep_Q	1.0	simple_mlp	True	0.05	2500000	23	True	IndivQLearningParticleDNNOnlyOneHotMoreSeeds2/13_0_13_none	none		0.05
IndivQLearningParticleDNNOnlyOneHotMoreSeeds2/14_0_14	slugs_centralized	shields/momentum_shield	True	-10	True	ParticleMomentum	False	False	10	-30	Individual_Deep_Q	1.0	simple_mlp	True	0.05	2500000	24	True	IndivQLearningParticleDNNOnlyOneHotMoreSeeds2/14_0_14_slugs_centralized	slugs_centralized	shields/momentum_shield	0.05
IndivQLearningParticleDNNOnlyOneHotMoreSeeds2/14_0_14	slugs_centralized	shields/momentum_shield	True	-10	True	ParticleMomentum	False	False	10	-30	Individual_Deep_Q	1.0	simple_mlp	True	0.05	2500000	24	True	IndivQLearningParticleDNNOnlyOneHotMoreSeeds2/14_0_14_slugs_decentralized	slugs_decentralized	shields/momentum_shield	0.05
IndivQLearningParticleDNNOnlyOneHotMoreSeeds2/14_0_14	slugs_centralized	shields/momentum_shield	True	-10	True	ParticleMomentum	False	False	10	-30	Individual_Deep_Q	1.0	simple_mlp	True	0.05	2500000	24	True	IndivQLearningParticleDNNOnlyOneHotMoreSeeds2/14_0_14_none	none		0.05
IndivQLearningParticleDNNOnlyOneHotMoreSeeds2/15_0_15	slugs_centralized	shields/momentum_shield	True	-10	True	ParticleMomentum	False	False	10	-30	Individual_Deep_Q	1.0	simple_mlp	True	0.05	2500000	25	True	IndivQLearningParticleDNNOnlyOneHotMoreSeeds2/15_0_15_slugs_centralized	slugs_centralized	shields/momentum_shield	0.05
IndivQLearningParticleDNNOnlyOneHotMoreSeeds2/15_0_15	slugs_centralized	shields/momentum_shield	True	-10	True	ParticleMomentum	False	False	10	-30	Individual_Deep_Q	1.0	simple_mlp	True	0.05	2500000	25	True	IndivQLearningParticleDNNOnlyOneHotMoreSeeds2/15_0_15_slugs_decentralized	slugs_decentralized	shields/momentum_shield	0.05
IndivQLearningParticleDNNOnlyOneHotMoreSeeds2/15_0_15	slugs_centralized	shields/momentum_shield	True	-10	True	ParticleMomentum	False	False	10	-30	Individual_Deep_Q	1.0	simple_mlp	True	0.05	2500000	25	True	IndivQLearningParticleDNNOnlyOneHotMoreSeeds2/15_0_15_none	none		0.05
IndivQLearningParticleDNNOnlyOneHotMoreSeeds2/16_0_16	slugs_centralized	shields/momentum_shield	True	-10	True	ParticleMomentum	False	False	10	-30	Individual_Deep_Q	1.0	simple_mlp	True	0.05	2500000	26	True	IndivQLearningParticleDNNOnlyOneHotMoreSeeds2/16_0_16_slugs_centralized	slugs_centralized	shields/momentum_shield	0.05
IndivQLearningParticleDNNOnlyOneHotMoreSeeds2/16_0_16	slugs_centralized	shields/momentum_shield	True	-10	True	ParticleMomentum	False	False	10	-30	Individual_Deep_Q	1.0	simple_mlp	True	0.05	2500000	26	True	IndivQLearningParticleDNNOnlyOneHotMoreSeeds2/16_0_16_slugs_decentralized	slugs_decentralized	shields/momentum_shield	0.05
IndivQLearningParticleDNNOnlyOneHotMoreSeeds2/16_0_16	slugs_centralized	shields/momentum_shield	True	-10	True	ParticleMomentum	False	False	10	-30	Individual_Deep_Q	1.0	simple_mlp	True	0.05	2500000	26	True	IndivQLearningParticleDNNOnlyOneHotMoreSeeds2/16_0_16_none	none		0.05
IndivQLearningParticleDNNOnlyOneHotMoreSeeds2/17_0_17	slugs_centralized	shields/momentum_shield	True	-10	True	ParticleMomentum	False	False	10	-30	Individual_Deep_Q	1.0	simple_mlp	True	0.05	2500000	27	True	IndivQLearningParticleDNNOnlyOneHotMoreSeeds2/17_0_17_slugs_centralized	slugs_centralized	shields/momentum_shield	0.05
IndivQLearningParticleDNNOnlyOneHotMoreSeeds2/17_0_17	slugs_centralized	shields/momentum_shield	True	-10	True	ParticleMomentum	False	False	10	-30	Individual_Deep_Q	1.0	simple_mlp	True	0.05	2500000	27	True	IndivQLearningParticleDNNOnlyOneHotMoreSeeds2/17_0_17_slugs_decentralized	slugs_decentralized	shields/momentum_shield	0.05
IndivQLearningParticleDNNOnlyOneHotMoreSeeds2/17_0_17	slugs_centralized	shields/momentum_shield	True	-10	True	ParticleMomentum	False	False	10	-30	Individual_Deep_Q	1.0	simple_mlp	True	0.05	2500000	27	True	IndivQLearningParticleDNNOnlyOneHotMoreSeeds2/17_0_17_none	none		0.05
IndivQLearningParticleDNNOnlyOneHotMoreSeeds2/18_0_18	slugs_centralized	shields/momentum_shield	True	-10	True	ParticleMomentum	False	False	10	-30	Individual_Deep_Q	1.0	simple_mlp	True	0.05	2500000	28	True	IndivQLearningParticleDNNOnlyOneHotMoreSeeds2/18_0_18_slugs_centralized	slugs_centralized	shields/momentum_shield	0.05
IndivQLearningParticleDNNOnlyOneHotMoreSeeds2/18_0_18	slugs_centralized	shields/momentum_shield	True	-10	True	ParticleMomentum	False	False	10	-30	Individual_Deep_Q	1.0	simple_mlp	True	0.05	2500000	28	True	IndivQLearningParticleDNNOnlyOneHotMoreSeeds2/18_0_18_slugs_decentralized	slugs_decentralized	shields/momentum_shield	0.05
IndivQLearningParticleDNNOnlyOneHotMoreSeeds2/18_0_18	slugs_centralized	shields/momentum_shield	True	-10	True	ParticleMomentum	False	False	10	-30	Individual_Deep_Q	1.0	simple_mlp	True	0.05	2500000	28	True	IndivQLearningParticleDNNOnlyOneHotMoreSeeds2/18_0_18_none	none		0.05
IndivQLearningParticleDNNOnlyOneHotMoreSeeds2/19_0_19	slugs_centralized	shields/momentum_shield	True	-10	True	ParticleMomentum	False	False	10	-30	Individual_Deep_Q	1.0	simple_mlp	True	0.05	2500000	29	True	IndivQLearningParticleDNNOnlyOneHotMoreSeeds2/19_0_19_slugs_centralized	slugs_centralized	shields/momentum_shield	0.05
IndivQLearningParticleDNNOnlyOneHotMoreSeeds2/19_0_19	slugs_centralized	shields/momentum_shield	True	-10	True	ParticleMomentum	False	False	10	-30	Individual_Deep_Q	1.0	simple_mlp	True	0.05	2500000	29	True	IndivQLearningParticleDNNOnlyOneHotMoreSeeds2/19_0_19_slugs_decentralized	slugs_decentralized	shields/momentum_shield	0.05
IndivQLearningParticleDNNOnlyOneHotMoreSeeds2/19_0_19	slugs_centralized	shields/momentum_shield	True	-10	True	ParticleMomentum	False	False	10	-30	Individual_Deep_Q	1.0	simple_mlp	True	0.05	2500000	29	True	IndivQLearningParticleDNNOnlyOneHotMoreSeeds2/19_0_19_none	none		0.05
IndivQLearningParticleDNNOnlyOneHotMoreSeeds2/20_0_20	slugs_centralized	shields/momentum_shield	True	-10	True	ParticleMomentum	False	False	10	-30	Individual_Deep_Q	1.0	simple_mlp	True	0.05	2500000	30	True	IndivQLearningParticleDNNOnlyOneHotMoreSeeds2/20_0_20_slugs_centralized	slugs_centralized	shields/momentum_shield	0.05
IndivQLearningParticleDNNOnlyOneHotMoreSeeds2/20_0_20	slugs_centralized	shields/momentum_shield	True	-10	True	ParticleMomentum	False	False	10	-30	Individual_Deep_Q	1.0	simple_mlp	True	0.05	2500000	30	True	IndivQLearningParticleDNNOnlyOneHotMoreSeeds2/20_0_20_slugs_decentralized	slugs_decentralized	shields/momentum_shield	0.05
IndivQLearningParticleDNNOnlyOneHotMoreSeeds2/20_0_20	slugs_centralized	shields/momentum_shield	True	-10	True	ParticleMomentum	False	False	10	-30	Individual_Deep_Q	1.0	simple_mlp	True	0.05	2500000	30	True	IndivQLearningParticleDNNOnlyOneHotMoreSeeds2/20_0_20_none	none		0.05
IndivQLearningParticleDNNOnlyOneHotMoreSeeds2/21_0_21	slugs_centralized	shields/momentum_shield	True	-10	True	ParticleMomentum	False	False	10	-30	Individual_Deep_Q	1.0	simple_mlp	True	0.05	2500000	31	True	IndivQLearningParticleDNNOnlyOneHotMoreSeeds2/21_0_21_slugs_centralized	slugs_centralized	shields/momentum_shield	0.05
IndivQLearningParticleDNNOnlyOneHotMoreSeeds2/21_0_21	slugs_centralized	shields/momentum_shield	True	-10	True	ParticleMomentum	False	False	10	-30	Individual_Deep_Q	1.0	simple_mlp	True	0.05	2500000	31	True	IndivQLearningParticleDNNOnlyOneHotMoreSeeds2/21_0_21_slugs_decentralized	slugs_decentralized	shields/momentum_shield	0.05
IndivQLearningParticleDNNOnlyOneHotMoreSeeds2/21_0_21	slugs_centralized	shields/momentum_shield	True	-10	True	ParticleMomentum	False	False	10	-30	Individual_Deep_Q	1.0	simple_mlp	True	0.05	2500000	31	True	IndivQLearningParticleDNNOnlyOneHotMoreSeeds2/21_0_21_none	none		0.05
IndivQLearningParticleDNNOnlyOneHotMoreSeeds2/22_0_22	slugs_centralized	shields/momentum_shield	True	-10	True	ParticleMomentum	False	False	10	-30	Individual_Deep_Q	1.0	simple_mlp	True	0.05	2500000	32	True	IndivQLearningParticleDNNOnlyOneHotMoreSeeds2/22_0_22_slugs_centralized	slugs_centralized	shields/momentum_shield	0.05
IndivQLearningParticleDNNOnlyOneHotMoreSeeds2/22_0_22	slugs_centralized	shields/momentum_shield	True	-10	True	ParticleMomentum	False	False	10	-30	Individual_Deep_Q	1.0	simple_mlp	True	0.05	2500000	32	True	IndivQLearningParticleDNNOnlyOneHotMoreSeeds2/22_0_22_slugs_decentralized	slugs_decentralized	shields/momentum_shield	0.05
IndivQLearningParticleDNNOnlyOneHotMoreSeeds2/22_0_22	slugs_centralized	shields/momentum_shield	True	-10	True	ParticleMomentum	False	False	10	-30	Individual_Deep_Q	1.0	simple_mlp	True	0.05	2500000	32	True	IndivQLearningParticleDNNOnlyOneHotMoreSeeds2/22_0_22_none	none		0.05
IndivQLearningParticleDNNOnlyOneHotMoreSeeds2/23_0_23	slugs_centralized	shields/momentum_shield	True	-10	True	ParticleMomentum	False	False	10	-30	Individual_Deep_Q	1.0	simple_mlp	True	0.05	2500000	33	True	IndivQLearningParticleDNNOnlyOneHotMoreSeeds2/23_0_23_slugs_centralized	slugs_centralized	shields/momentum_shield	0.05
IndivQLearningParticleDNNOnlyOneHotMoreSeeds2/23_0_23	slugs_centralized	shields/momentum_shield	True	-10	True	ParticleMomentum	False	False	10	-30	Individual_Deep_Q	1.0	simple_mlp	True	0.05	2500000	33	True	IndivQLearningParticleDNNOnlyOneHotMoreSeeds2/23_0_23_slugs_decentralized	slugs_decentralized	shields/momentum_shield	0.05
IndivQLearningParticleDNNOnlyOneHotMoreSeeds2/23_0_23	slugs_centralized	shields/momentum_shield	True	-10	True	ParticleMomentum	False	False	10	-30	Individual_Deep_Q	1.0	simple_mlp	True	0.05	2500000	33	True	IndivQLearningParticleDNNOnlyOneHotMoreSeeds2/23_0_23_none	none		0.05
IndivQLearningParticleDNNOnlyOneHotMoreSeeds2/24_0_24	slugs_centralized	shields/momentum_shield	True	-10	True	ParticleMomentum	False	False	10	-30	Individual_Deep_Q	1.0	simple_mlp	True	0.05	2500000	34	True	IndivQLearningParticleDNNOnlyOneHotMoreSeeds2/24_0_24_slugs_centralized	slugs_centralized	shields/momentum_shield	0.05
IndivQLearningParticleDNNOnlyOneHotMoreSeeds2/24_0_24	slugs_centralized	shields/momentum_shield	True	-10	True	ParticleMomentum	False	False	10	-30	Individual_Deep_Q	1.0	simple_mlp	True	0.05	2500000	34	True	IndivQLearningParticleDNNOnlyOneHotMoreSeeds2/24_0_24_slugs_decentralized	slugs_decentralized	shields/momentum_shield	0.05
IndivQLearningParticleDNNOnlyOneHotMoreSeeds2/24_0_24	slugs_centralized	shields/momentum_shield	True	-10	True	ParticleMomentum	False	False	10	-30	Individual_Deep_Q	1.0	simple_mlp	True	0.05	2500000	34	True	IndivQLearningParticleDNNOnlyOneHotMoreSeeds2/24_0_24_none	none		0.05
IndivQLearningParticleDNNOnlyOneHotMoreSeeds2/25_0_25	slugs_centralized	shields/momentum_shield	True	-10	True	ParticleMomentum	False	False	10	-30	Individual_Deep_Q	1.0	simple_mlp	True	0.05	2500000	35	True	IndivQLearningParticleDNNOnlyOneHotMoreSeeds2/25_0_25_slugs_centralized	slugs_centralized	shields/momentum_shield	0.05
IndivQLearningParticleDNNOnlyOneHotMoreSeeds2/25_0_25	slugs_centralized	shields/momentum_shield	True	-10	True	ParticleMomentum	False	False	10	-30	Individual_Deep_Q	1.0	simple_mlp	True	0.05	2500000	35	True	IndivQLearningParticleDNNOnlyOneHotMoreSeeds2/25_0_25_slugs_decentralized	slugs_decentralized	shields/momentum_shield	0.05
IndivQLearningParticleDNNOnlyOneHotMoreSeeds2/25_0_25	slugs_centralized	shields/momentum_shield	True	-10	True	ParticleMomentum	False	False	10	-30	Individual_Deep_Q	1.0	simple_mlp	True	0.05	2500000	35	True	IndivQLearningParticleDNNOnlyOneHotMoreSeeds2/25_0_25_none	none		0.05
IndivQLearningParticleDNNOnlyOneHotMoreSeeds2/26_0_26	slugs_centralized	shields/momentum_shield	True	-10	True	ParticleMomentum	False	False	10	-30	Individual_Deep_Q	1.0	simple_mlp	True	0.05	2500000	36	True	IndivQLearningParticleDNNOnlyOneHotMoreSeeds2/26_0_26_slugs_centralized	slugs_centralized	shields/momentum_shield	0.05
IndivQLearningParticleDNNOnlyOneHotMoreSeeds2/26_0_26	slugs_centralized	shields/momentum_shield	True	-10	True	ParticleMomentum	False	False	10	-30	Individual_Deep_Q	1.0	simple_mlp	True	0.05	2500000	36	True	IndivQLearningParticleDNNOnlyOneHotMoreSeeds2/26_0_26_slugs_decentralized	slugs_decentralized	shields/momentum_shield	0.05
IndivQLearningParticleDNNOnlyOneHotMoreSeeds2/26_0_26	slugs_centralized	shields/momentum_shield	True	-10	True	ParticleMomentum	False	False	10	-30	Individual_Deep_Q	1.0	simple_mlp	True	0.05	2500000	36	True	IndivQLearningParticleDNNOnlyOneHotMoreSeeds2/26_0_26_none	none		0.05
IndivQLearningParticleDNNOnlyOneHotMoreSeeds2/27_0_27	slugs_centralized	shields/momentum_shield	True	-10	True	ParticleMomentum	False	False	10	-30	Individual_Deep_Q	1.0	simple_mlp	True	0.05	2500000	37	True	IndivQLearningParticleDNNOnlyOneHotMoreSeeds2/27_0_27_slugs_centralized	slugs_centralized	shields/momentum_shield	0.05
IndivQLearningParticleDNNOnlyOneHotMoreSeeds2/27_0_27	slugs_centralized	shields/momentum_shield	True	-10	True	ParticleMomentum	False	False	10	-30	Individual_Deep_Q	1.0	simple_mlp	True	0.05	2500000	37	True	IndivQLearningParticleDNNOnlyOneHotMoreSeeds2/27_0_27_slugs_decentralized	slugs_decentralized	shields/momentum_shield	0.05
IndivQLearningParticleDNNOnlyOneHotMoreSeeds2/27_0_27	slugs_centralized	shields/momentum_shield	True	-10	True	ParticleMomentum	False	False	10	-30	Individual_Deep_Q	1.0	simple_mlp	True	0.05	2500000	37	True	IndivQLearningParticleDNNOnlyOneHotMoreSeeds2/27_0_27_none	none		0.05
IndivQLearningParticleDNNOnlyOneHotMoreSeeds2/28_0_28	slugs_centralized	shields/momentum_shield	True	-10	True	ParticleMomentum	False	False	10	-30	Individual_Deep_Q	1.0	simple_mlp	True	0.05	2500000	38	True	IndivQLearningParticleDNNOnlyOneHotMoreSeeds2/28_0_28_slugs_centralized	slugs_centralized	shields/momentum_shield	0.05
IndivQLearningParticleDNNOnlyOneHotMoreSeeds2/28_0_28	slugs_centralized	shields/momentum_shield	True	-10	True	ParticleMomentum	False	False	10	-30	Individual_Deep_Q	1.0	simple_mlp	True	0.05	2500000	38	True	IndivQLearningParticleDNNOnlyOneHotMoreSeeds2/28_0_28_slugs_decentralized	slugs_decentralized	shields/momentum_shield	0.05
IndivQLearningParticleDNNOnlyOneHotMoreSeeds2/28_0_28	slugs_centralized	shields/momentum_shield	True	-10	True	ParticleMomentum	False	False	10	-30	Individual_Deep_Q	1.0	simple_mlp	True	0.05	2500000	38	True	IndivQLearningParticleDNNOnlyOneHotMoreSeeds2/28_0_28_none	none		0.05
IndivQLearningParticleDNNOnlyOneHotMoreSeeds2/29_0_29	slugs_centralized	shields/momentum_shield	True	-10	True	ParticleMomentum	False	False	10	-30	Individual_Deep_Q	1.0	simple_mlp	True	0.05	2500000	39	True	IndivQLearningParticleDNNOnlyOneHotMoreSeeds2/29_0_29_slugs_centralized	slugs_centralized	shields/momentum_shield	0.05
IndivQLearningParticleDNNOnlyOneHotMoreSeeds2/29_0_29	slugs_centralized	shields/momentum_shield	True	-10	True	ParticleMomentum	False	False	10	-30	Individual_Deep_Q	1.0	simple_mlp	True	0.05	2500000	39	True	IndivQLearningParticleDNNOnlyOneHotMoreSeeds2/29_0_29_slugs_decentralized	slugs_decentralized	shields/momentum_shield	0.05
IndivQLearningParticleDNNOnlyOneHotMoreSeeds2/29_0_29	slugs_centralized	shields/momentum_shield	True	-10	True	ParticleMomentum	False	False	10	-30	Individual_Deep_Q	1.0	simple_mlp	True	0.05	2500000	39	True	IndivQLearningParticleDNNOnlyOneHotMoreSeeds2/29_0_29_none	none		0.05
IndivQLearningParticleDNNOnlyOneHotMoreSeeds2/30_0_30	slugs_centralized	shields/momentum_shield	True	-10	True	ParticleMomentum	False	False	10	-30	Individual_Deep_Q	1.0	simple_mlp	True	0.05	2500000	40	True	IndivQLearningParticleDNNOnlyOneHotMoreSeeds2/30_0_30_slugs_centralized	slugs_centralized	shields/momentum_shield	0.05
IndivQLearningParticleDNNOnlyOneHotMoreSeeds2/30_0_30	slugs_centralized	shields/momentum_shield	True	-10	True	ParticleMomentum	False	False	10	-30	Individual_Deep_Q	1.0	simple_mlp	True	0.05	2500000	40	True	IndivQLearningParticleDNNOnlyOneHotMoreSeeds2/30_0_30_slugs_decentralized	slugs_decentralized	shields/momentum_shield	0.05
IndivQLearningParticleDNNOnlyOneHotMoreSeeds2/30_0_30	slugs_centralized	shields/momentum_shield	True	-10	True	ParticleMomentum	False	False	10	-30	Individual_Deep_Q	1.0	simple_mlp	True	0.05	2500000	40	True	IndivQLearningParticleDNNOnlyOneHotMoreSeeds2/30_0_30_none	none		0.05
IndivQLearningParticleDNNOnlyOneHotMoreSeeds2/31_0_31	slugs_centralized	shields/momentum_shield	True	-10	True	ParticleMomentum	False	False	10	-30	Individual_Deep_Q	1.0	simple_mlp	True	0.05	2500000	41	True	IndivQLearningParticleDNNOnlyOneHotMoreSeeds2/31_0_31_slugs_centralized	slugs_centralized	shields/momentum_shield	0.05
IndivQLearningParticleDNNOnlyOneHotMoreSeeds2/31_0_31	slugs_centralized	shields/momentum_shield	True	-10	True	ParticleMomentum	False	False	10	-30	Individual_Deep_Q	1.0	simple_mlp	True	0.05	2500000	41	True	IndivQLearningParticleDNNOnlyOneHotMoreSeeds2/31_0_31_slugs_decentralized	slugs_decentralized	shields/momentum_shield	0.05
IndivQLearningParticleDNNOnlyOneHotMoreSeeds2/31_0_31	slugs_centralized	shields/momentum_shield	True	-10	True	ParticleMomentum	False	False	10	-30	Individual_Deep_Q	1.0	simple_mlp	True	0.05	2500000	41	True	IndivQLearningParticleDNNOnlyOneHotMoreSeeds2/31_0_31_none	none		0.05
IndivQLearningParticleDNNOnlyOneHotMoreSeeds2/32_0_32	slugs_centralized	shields/momentum_shield	True	-10	True	ParticleMomentum	False	False	10	-30	Individual_Deep_Q	1.0	simple_mlp	True	0.05	2500000	42	True	IndivQLearningParticleDNNOnlyOneHotMoreSeeds2/32_0_32_slugs_centralized	slugs_centralized	shields/momentum_shield	0.05
IndivQLearningParticleDNNOnlyOneHotMoreSeeds2/32_0_32	slugs_centralized	shields/momentum_shield	True	-10	True	ParticleMomentum	False	False	10	-30	Individual_Deep_Q	1.0	simple_mlp	True	0.05	2500000	42	True	IndivQLearningParticleDNNOnlyOneHotMoreSeeds2/32_0_32_slugs_decentralized	slugs_decentralized	shields/momentum_shield	0.05
IndivQLearningParticleDNNOnlyOneHotMoreSeeds2/32_0_32	slugs_centralized	shields/momentum_shield	True	-10	True	ParticleMomentum	False	False	10	-30	Individual_Deep_Q	1.0	simple_mlp	True	0.05	2500000	42	True	IndivQLearningParticleDNNOnlyOneHotMoreSeeds2/32_0_32_none	none		0.05
IndivQLearningParticleDNNOnlyOneHotMoreSeeds2/33_0_33	slugs_centralized	shields/momentum_shield	True	-10	True	ParticleMomentum	False	False	10	-30	Individual_Deep_Q	1.0	simple_mlp	True	0.05	2500000	43	True	IndivQLearningParticleDNNOnlyOneHotMoreSeeds2/33_0_33_slugs_centralized	slugs_centralized	shields/momentum_shield	0.05
IndivQLearningParticleDNNOnlyOneHotMoreSeeds2/33_0_33	slugs_centralized	shields/momentum_shield	True	-10	True	ParticleMomentum	False	False	10	-30	Individual_Deep_Q	1.0	simple_mlp	True	0.05	2500000	43	True	IndivQLearningParticleDNNOnlyOneHotMoreSeeds2/33_0_33_slugs_decentralized	slugs_decentralized	shields/momentum_shield	0.05
IndivQLearningParticleDNNOnlyOneHotMoreSeeds2/33_0_33	slugs_centralized	shields/momentum_shield	True	-10	True	ParticleMomentum	False	False	10	-30	Individual_Deep_Q	1.0	simple_mlp	True	0.05	2500000	43	True	IndivQLearningParticleDNNOnlyOneHotMoreSeeds2/33_0_33_none	none		0.05
IndivQLearningParticleDNNOnlyOneHotMoreSeeds2/34_0_34	slugs_centralized	shields/momentum_shield	True	-10	True	ParticleMomentum	False	False	10	-30	Individual_Deep_Q	1.0	simple_mlp	True	0.05	2500000	44	True	IndivQLearningParticleDNNOnlyOneHotMoreSeeds2/34_0_34_slugs_centralized	slugs_centralized	shields/momentum_shield	0.05
IndivQLearningParticleDNNOnlyOneHotMoreSeeds2/34_0_34	slugs_centralized	shields/momentum_shield	True	-10	True	ParticleMomentum	False	False	10	-30	Individual_Deep_Q	1.0	simple_mlp	True	0.05	2500000	44	True	IndivQLearningParticleDNNOnlyOneHotMoreSeeds2/34_0_34_slugs_decentralized	slugs_decentralized	shields/momentum_shield	0.05
IndivQLearningParticleDNNOnlyOneHotMoreSeeds2/34_0_34	slugs_centralized	shields/momentum_shield	True	-10	True	ParticleMomentum	False	False	10	-30	Individual_Deep_Q	1.0	simple_mlp	True	0.05	2500000	44	True	IndivQLearningParticleDNNOnlyOneHotMoreSeeds2/34_0_34_none	none		0.05
IndivQLearningParticleDNNOnlyOneHotMoreSeeds2/35_0_35	slugs_centralized	shields/momentum_shield	True	-10	True	ParticleMomentum	False	False	10	-30	Individual_Deep_Q	1.0	simple_mlp	True	0.05	2500000	45	True	IndivQLearningParticleDNNOnlyOneHotMoreSeeds2/35_0_35_slugs_centralized	slugs_centralized	shields/momentum_shield	0.05
IndivQLearningParticleDNNOnlyOneHotMoreSeeds2/35_0_35	slugs_centralized	shields/momentum_shield	True	-10	True	ParticleMomentum	False	False	10	-30	Individual_Deep_Q	1.0	simple_mlp	True	0.05	2500000	45	True	IndivQLearningParticleDNNOnlyOneHotMoreSeeds2/35_0_35_slugs_decentralized	slugs_decentralized	shields/momentum_shield	0.05
IndivQLearningParticleDNNOnlyOneHotMoreSeeds2/35_0_35	slugs_centralized	shields/momentum_shield	True	-10	True	ParticleMomentum	False	False	10	-30	Individual_Deep_Q	1.0	simple_mlp	True	0.05	2500000	45	True	IndivQLearningParticleDNNOnlyOneHotMoreSeeds2/35_0_35_none	none		0.05
IndivQLearningParticleDNNOnlyOneHotMoreSeeds2/36_0_36	slugs_centralized	shields/momentum_shield	True	-10	True	ParticleMomentum	False	False	10	-30	Individual_Deep_Q	1.0	simple_mlp	True	0.05	2500000	46	True	IndivQLearningParticleDNNOnlyOneHotMoreSeeds2/36_0_36_slugs_centralized	slugs_centralized	shields/momentum_shield	0.05
IndivQLearningParticleDNNOnlyOneHotMoreSeeds2/36_0_36	slugs_centralized	shields/momentum_shield	True	-10	True	ParticleMomentum	False	False	10	-30	Individual_Deep_Q	1.0	simple_mlp	True	0.05	2500000	46	True	IndivQLearningParticleDNNOnlyOneHotMoreSeeds2/36_0_36_slugs_decentralized	slugs_decentralized	shields/momentum_shield	0.05
IndivQLearningParticleDNNOnlyOneHotMoreSeeds2/36_0_36	slugs_centralized	shields/momentum_shield	True	-10	True	ParticleMomentum	False	False	10	-30	Individual_Deep_Q	1.0	simple_mlp	True	0.05	2500000	46	True	IndivQLearningParticleDNNOnlyOneHotMoreSeeds2/36_0_36_none	none		0.05
IndivQLearningParticleDNNOnlyOneHotMoreSeeds2/37_0_37	slugs_centralized	shields/momentum_shield	True	-10	True	ParticleMomentum	False	False	10	-30	Individual_Deep_Q	1.0	simple_mlp	True	0.05	2500000	47	True	IndivQLearningParticleDNNOnlyOneHotMoreSeeds2/37_0_37_slugs_centralized	slugs_centralized	shields/momentum_shield	0.05
IndivQLearningParticleDNNOnlyOneHotMoreSeeds2/37_0_37	slugs_centralized	shields/momentum_shield	True	-10	True	ParticleMomentum	False	False	10	-30	Individual_Deep_Q	1.0	simple_mlp	True	0.05	2500000	47	True	IndivQLearningParticleDNNOnlyOneHotMoreSeeds2/37_0_37_slugs_decentralized	slugs_decentralized	shields/momentum_shield	0.05
IndivQLearningParticleDNNOnlyOneHotMoreSeeds2/37_0_37	slugs_centralized	shields/momentum_shield	True	-10	True	ParticleMomentum	False	False	10	-30	Individual_Deep_Q	1.0	simple_mlp	True	0.05	2500000	47	True	IndivQLearningParticleDNNOnlyOneHotMoreSeeds2/37_0_37_none	none		0.05
IndivQLearningParticleDNNOnlyOneHotMoreSeeds2/38_0_38	slugs_centralized	shields/momentum_shield	True	-10	True	ParticleMomentum	False	False	10	-30	Individual_Deep_Q	1.0	simple_mlp	True	0.05	2500000	48	True	IndivQLearningParticleDNNOnlyOneHotMoreSeeds2/38_0_38_slugs_centralized	slugs_centralized	shields/momentum_shield	0.05
IndivQLearningParticleDNNOnlyOneHotMoreSeeds2/38_0_38	slugs_centralized	shields/momentum_shield	True	-10	True	ParticleMomentum	False	False	10	-30	Individual_Deep_Q	1.0	simple_mlp	True	0.05	2500000	48	True	IndivQLearningParticleDNNOnlyOneHotMoreSeeds2/38_0_38_slugs_decentralized	slugs_decentralized	shields/momentum_shield	0.05
IndivQLearningParticleDNNOnlyOneHotMoreSeeds2/38_0_38	slugs_centralized	shields/momentum_shield	True	-10	True	ParticleMomentum	False	False	10	-30	Individual_Deep_Q	1.0	simple_mlp	True	0.05	2500000	48	True	IndivQLearningParticleDNNOnlyOneHotMoreSeeds2/38_0_38_none	none		0.05
IndivQLearningParticleDNNOnlyOneHotMoreSeeds2/39_0_39	slugs_centralized	shields/momentum_shield	True	-10	True	ParticleMomentum	False	False	10	-30	Individual_Deep_Q	1.0	simple_mlp	True	0.05	2500000	49	True	IndivQLearningParticleDNNOnlyOneHotMoreSeeds2/39_0_39_slugs_centralized	slugs_centralized	shields/momentum_shield	0.05
IndivQLearningParticleDNNOnlyOneHotMoreSeeds2/39_0_39	slugs_centralized	shields/momentum_shield	True	-10	True	ParticleMomentum	False	False	10	-30	Individual_Deep_Q	1.0	simple_mlp	True	0.05	2500000	49	True	IndivQLearningParticleDNNOnlyOneHotMoreSeeds2/39_0_39_slugs_decentralized	slugs_decentralized	shields/momentum_shield	0.05
IndivQLearningParticleDNNOnlyOneHotMoreSeeds2/39_0_39	slugs_centralized	shields/momentum_shield	True	-10	True	ParticleMomentum	False	False	10	-30	Individual_Deep_Q	1.0	simple_mlp	True	0.05	2500000	49	True	IndivQLearningParticleDNNOnlyOneHotMoreSeeds2/39_0_39_none	none		0.05
IndivQLearningParticleDNNOnlyOneHotMoreSeeds2/40_1_0	slugs_decentralized	shields/momentum_shield	True	-10	True	ParticleMomentum	False	False	10	-30	Individual_Deep_Q	1.0	simple_mlp	True	0.05	2500000	10	True	IndivQLearningParticleDNNOnlyOneHotMoreSeeds2/40_1_0_slugs_centralized	slugs_centralized	shields/momentum_shield	0.05
IndivQLearningParticleDNNOnlyOneHotMoreSeeds2/40_1_0	slugs_decentralized	shields/momentum_shield	True	-10	True	ParticleMomentum	False	False	10	-30	Individual_Deep_Q	1.0	simple_mlp	True	0.05	2500000	10	True	IndivQLearningParticleDNNOnlyOneHotMoreSeeds2/40_1_0_slugs_decentralized	slugs_decentralized	shields/momentum_shield	0.05
IndivQLearningParticleDNNOnlyOneHotMoreSeeds2/40_1_0	slugs_decentralized	shields/momentum_shield	True	-10	True	ParticleMomentum	False	False	10	-30	Individual_Deep_Q	1.0	simple_mlp	True	0.05	2500000	10	True	IndivQLearningParticleDNNOnlyOneHotMoreSeeds2/40_1_0_none	none		0.05
IndivQLearningParticleDNNOnlyOneHotMoreSeeds2/41_1_1	slugs_decentralized	shields/momentum_shield	True	-10	True	ParticleMomentum	False	False	10	-30	Individual_Deep_Q	1.0	simple_mlp	True	0.05	2500000	11	True	IndivQLearningParticleDNNOnlyOneHotMoreSeeds2/41_1_1_slugs_centralized	slugs_centralized	shields/momentum_shield	0.05
IndivQLearningParticleDNNOnlyOneHotMoreSeeds2/41_1_1	slugs_decentralized	shields/momentum_shield	True	-10	True	ParticleMomentum	False	False	10	-30	Individual_Deep_Q	1.0	simple_mlp	True	0.05	2500000	11	True	IndivQLearningParticleDNNOnlyOneHotMoreSeeds2/41_1_1_slugs_decentralized	slugs_decentralized	shields/momentum_shield	0.05
IndivQLearningParticleDNNOnlyOneHotMoreSeeds2/41_1_1	slugs_decentralized	shields/momentum_shield	True	-10	True	ParticleMomentum	False	False	10	-30	Individual_Deep_Q	1.0	simple_mlp	True	0.05	2500000	11	True	IndivQLearningParticleDNNOnlyOneHotMoreSeeds2/41_1_1_none	none		0.05
IndivQLearningParticleDNNOnlyOneHotMoreSeeds2/42_1_2	slugs_decentralized	shields/momentum_shield	True	-10	True	ParticleMomentum	False	False	10	-30	Individual_Deep_Q	1.0	simple_mlp	True	0.05	2500000	12	True	IndivQLearningParticleDNNOnlyOneHotMoreSeeds2/42_1_2_slugs_centralized	slugs_centralized	shields/momentum_shield	0.05
IndivQLearningParticleDNNOnlyOneHotMoreSeeds2/42_1_2	slugs_decentralized	shields/momentum_shield	True	-10	True	ParticleMomentum	False	False	10	-30	Individual_Deep_Q	1.0	simple_mlp	True	0.05	2500000	12	True	IndivQLearningParticleDNNOnlyOneHotMoreSeeds2/42_1_2_slugs_decentralized	slugs_decentralized	shields/momentum_shield	0.05
IndivQLearningParticleDNNOnlyOneHotMoreSeeds2/42_1_2	slugs_decentralized	shields/momentum_shield	True	-10	True	ParticleMomentum	False	False	10	-30	Individual_Deep_Q	1.0	simple_mlp	True	0.05	2500000	12	True	IndivQLearningParticleDNNOnlyOneHotMoreSeeds2/42_1_2_none	none		0.05
IndivQLearningParticleDNNOnlyOneHotMoreSeeds2/43_1_3	slugs_decentralized	shields/momentum_shield	True	-10	True	ParticleMomentum	False	False	10	-30	Individual_Deep_Q	1.0	simple_mlp	True	0.05	2500000	13	True	IndivQLearningParticleDNNOnlyOneHotMoreSeeds2/43_1_3_slugs_centralized	slugs_centralized	shields/momentum_shield	0.05
IndivQLearningParticleDNNOnlyOneHotMoreSeeds2/43_1_3	slugs_decentralized	shields/momentum_shield	True	-10	True	ParticleMomentum	False	False	10	-30	Individual_Deep_Q	1.0	simple_mlp	True	0.05	2500000	13	True	IndivQLearningParticleDNNOnlyOneHotMoreSeeds2/43_1_3_slugs_decentralized	slugs_decentralized	shields/momentum_shield	0.05
IndivQLearningParticleDNNOnlyOneHotMoreSeeds2/43_1_3	slugs_decentralized	shields/momentum_shield	True	-10	True	ParticleMomentum	False	False	10	-30	Individual_Deep_Q	1.0	simple_mlp	True	0.05	2500000	13	True	IndivQLearningParticleDNNOnlyOneHotMoreSeeds2/43_1_3_none	none		0.05
IndivQLearningParticleDNNOnlyOneHotMoreSeeds2/44_1_4	slugs_decentralized	shields/momentum_shield	True	-10	True	ParticleMomentum	False	False	10	-30	Individual_Deep_Q	1.0	simple_mlp	True	0.05	2500000	14	True	IndivQLearningParticleDNNOnlyOneHotMoreSeeds2/44_1_4_slugs_centralized	slugs_centralized	shields/momentum_shield	0.05
IndivQLearningParticleDNNOnlyOneHotMoreSeeds2/44_1_4	slugs_decentralized	shields/momentum_shield	True	-10	True	ParticleMomentum	False	False	10	-30	Individual_Deep_Q	1.0	simple_mlp	True	0.05	2500000	14	True	IndivQLearningParticleDNNOnlyOneHotMoreSeeds2/44_1_4_slugs_decentralized	slugs_decentralized	shields/momentum_shield	0.05
IndivQLearningParticleDNNOnlyOneHotMoreSeeds2/44_1_4	slugs_decentralized	shields/momentum_shield	True	-10	True	ParticleMomentum	False	False	10	-30	Individual_Deep_Q	1.0	simple_mlp	True	0.05	2500000	14	True	IndivQLearningParticleDNNOnlyOneHotMoreSeeds2/44_1_4_none	none		0.05
IndivQLearningParticleDNNOnlyOneHotMoreSeeds2/45_1_5	slugs_decentralized	shields/momentum_shield	True	-10	True	ParticleMomentum	False	False	10	-30	Individual_Deep_Q	1.0	simple_mlp	True	0.05	2500000	15	True	IndivQLearningParticleDNNOnlyOneHotMoreSeeds2/45_1_5_slugs_centralized	slugs_centralized	shields/momentum_shield	0.05
IndivQLearningParticleDNNOnlyOneHotMoreSeeds2/45_1_5	slugs_decentralized	shields/momentum_shield	True	-10	True	ParticleMomentum	False	False	10	-30	Individual_Deep_Q	1.0	simple_mlp	True	0.05	2500000	15	True	IndivQLearningParticleDNNOnlyOneHotMoreSeeds2/45_1_5_slugs_decentralized	slugs_decentralized	shields/momentum_shield	0.05
IndivQLearningParticleDNNOnlyOneHotMoreSeeds2/45_1_5	slugs_decentralized	shields/momentum_shield	True	-10	True	ParticleMomentum	False	False	10	-30	Individual_Deep_Q	1.0	simple_mlp	True	0.05	2500000	15	True	IndivQLearningParticleDNNOnlyOneHotMoreSeeds2/45_1_5_none	none		0.05
IndivQLearningParticleDNNOnlyOneHotMoreSeeds2/46_1_6	slugs_decentralized	shields/momentum_shield	True	-10	True	ParticleMomentum	False	False	10	-30	Individual_Deep_Q	1.0	simple_mlp	True	0.05	2500000	16	True	IndivQLearningParticleDNNOnlyOneHotMoreSeeds2/46_1_6_slugs_centralized	slugs_centralized	shields/momentum_shield	0.05
IndivQLearningParticleDNNOnlyOneHotMoreSeeds2/46_1_6	slugs_decentralized	shields/momentum_shield	True	-10	True	ParticleMomentum	False	False	10	-30	Individual_Deep_Q	1.0	simple_mlp	True	0.05	2500000	16	True	IndivQLearningParticleDNNOnlyOneHotMoreSeeds2/46_1_6_slugs_decentralized	slugs_decentralized	shields/momentum_shield	0.05
IndivQLearningParticleDNNOnlyOneHotMoreSeeds2/46_1_6	slugs_decentralized	shields/momentum_shield	True	-10	True	ParticleMomentum	False	False	10	-30	Individual_Deep_Q	1.0	simple_mlp	True	0.05	2500000	16	True	IndivQLearningParticleDNNOnlyOneHotMoreSeeds2/46_1_6_none	none		0.05
IndivQLearningParticleDNNOnlyOneHotMoreSeeds2/47_1_7	slugs_decentralized	shields/momentum_shield	True	-10	True	ParticleMomentum	False	False	10	-30	Individual_Deep_Q	1.0	simple_mlp	True	0.05	2500000	17	True	IndivQLearningParticleDNNOnlyOneHotMoreSeeds2/47_1_7_slugs_centralized	slugs_centralized	shields/momentum_shield	0.05
IndivQLearningParticleDNNOnlyOneHotMoreSeeds2/47_1_7	slugs_decentralized	shields/momentum_shield	True	-10	True	ParticleMomentum	False	False	10	-30	Individual_Deep_Q	1.0	simple_mlp	True	0.05	2500000	17	True	IndivQLearningParticleDNNOnlyOneHotMoreSeeds2/47_1_7_slugs_decentralized	slugs_decentralized	shields/momentum_shield	0.05
IndivQLearningParticleDNNOnlyOneHotMoreSeeds2/47_1_7	slugs_decentralized	shields/momentum_shield	True	-10	True	ParticleMomentum	False	False	10	-30	Individual_Deep_Q	1.0	simple_mlp	True	0.05	2500000	17	True	IndivQLearningParticleDNNOnlyOneHotMoreSeeds2/47_1_7_none	none		0.05
IndivQLearningParticleDNNOnlyOneHotMoreSeeds2/48_1_8	slugs_decentralized	shields/momentum_shield	True	-10	True	ParticleMomentum	False	False	10	-30	Individual_Deep_Q	1.0	simple_mlp	True	0.05	2500000	18	True	IndivQLearningParticleDNNOnlyOneHotMoreSeeds2/48_1_8_slugs_centralized	slugs_centralized	shields/momentum_shield	0.05
IndivQLearningParticleDNNOnlyOneHotMoreSeeds2/48_1_8	slugs_decentralized	shields/momentum_shield	True	-10	True	ParticleMomentum	False	False	10	-30	Individual_Deep_Q	1.0	simple_mlp	True	0.05	2500000	18	True	IndivQLearningParticleDNNOnlyOneHotMoreSeeds2/48_1_8_slugs_decentralized	slugs_decentralized	shields/momentum_shield	0.05
IndivQLearningParticleDNNOnlyOneHotMoreSeeds2/48_1_8	slugs_decentralized	shields/momentum_shield	True	-10	True	ParticleMomentum	False	False	10	-30	Individual_Deep_Q	1.0	simple_mlp	True	0.05	2500000	18	True	IndivQLearningParticleDNNOnlyOneHotMoreSeeds2/48_1_8_none	none		0.05
IndivQLearningParticleDNNOnlyOneHotMoreSeeds2/49_1_9	slugs_decentralized	shields/momentum_shield	True	-10	True	ParticleMomentum	False	False	10	-30	Individual_Deep_Q	1.0	simple_mlp	True	0.05	2500000	19	True	IndivQLearningParticleDNNOnlyOneHotMoreSeeds2/49_1_9_slugs_centralized	slugs_centralized	shields/momentum_shield	0.05
IndivQLearningParticleDNNOnlyOneHotMoreSeeds2/49_1_9	slugs_decentralized	shields/momentum_shield	True	-10	True	ParticleMomentum	False	False	10	-30	Individual_Deep_Q	1.0	simple_mlp	True	0.05	2500000	19	True	IndivQLearningParticleDNNOnlyOneHotMoreSeeds2/49_1_9_slugs_decentralized	slugs_decentralized	shields/momentum_shield	0.05
IndivQLearningParticleDNNOnlyOneHotMoreSeeds2/49_1_9	slugs_decentralized	shields/momentum_shield	True	-10	True	ParticleMomentum	False	False	10	-30	Individual_Deep_Q	1.0	simple_mlp	True	0.05	2500000	19	True	IndivQLearningParticleDNNOnlyOneHotMoreSeeds2/49_1_9_none	none		0.05
IndivQLearningParticleDNNOnlyOneHotMoreSeeds2/50_1_10	slugs_decentralized	shields/momentum_shield	True	-10	True	ParticleMomentum	False	False	10	-30	Individual_Deep_Q	1.0	simple_mlp	True	0.05	2500000	20	True	IndivQLearningParticleDNNOnlyOneHotMoreSeeds2/50_1_10_slugs_centralized	slugs_centralized	shields/momentum_shield	0.05
IndivQLearningParticleDNNOnlyOneHotMoreSeeds2/50_1_10	slugs_decentralized	shields/momentum_shield	True	-10	True	ParticleMomentum	False	False	10	-30	Individual_Deep_Q	1.0	simple_mlp	True	0.05	2500000	20	True	IndivQLearningParticleDNNOnlyOneHotMoreSeeds2/50_1_10_slugs_decentralized	slugs_decentralized	shields/momentum_shield	0.05
IndivQLearningParticleDNNOnlyOneHotMoreSeeds2/50_1_10	slugs_decentralized	shields/momentum_shield	True	-10	True	ParticleMomentum	False	False	10	-30	Individual_Deep_Q	1.0	simple_mlp	True	0.05	2500000	20	True	IndivQLearningParticleDNNOnlyOneHotMoreSeeds2/50_1_10_none	none		0.05
IndivQLearningParticleDNNOnlyOneHotMoreSeeds2/51_1_11	slugs_decentralized	shields/momentum_shield	True	-10	True	ParticleMomentum	False	False	10	-30	Individual_Deep_Q	1.0	simple_mlp	True	0.05	2500000	21	True	IndivQLearningParticleDNNOnlyOneHotMoreSeeds2/51_1_11_slugs_centralized	slugs_centralized	shields/momentum_shield	0.05
IndivQLearningParticleDNNOnlyOneHotMoreSeeds2/51_1_11	slugs_decentralized	shields/momentum_shield	True	-10	True	ParticleMomentum	False	False	10	-30	Individual_Deep_Q	1.0	simple_mlp	True	0.05	2500000	21	True	IndivQLearningParticleDNNOnlyOneHotMoreSeeds2/51_1_11_slugs_decentralized	slugs_decentralized	shields/momentum_shield	0.05
IndivQLearningParticleDNNOnlyOneHotMoreSeeds2/51_1_11	slugs_decentralized	shields/momentum_shield	True	-10	True	ParticleMomentum	False	False	10	-30	Individual_Deep_Q	1.0	simple_mlp	True	0.05	2500000	21	True	IndivQLearningParticleDNNOnlyOneHotMoreSeeds2/51_1_11_none	none		0.05
IndivQLearningParticleDNNOnlyOneHotMoreSeeds2/52_1_12	slugs_decentralized	shields/momentum_shield	True	-10	True	ParticleMomentum	False	False	10	-30	Individual_Deep_Q	1.0	simple_mlp	True	0.05	2500000	22	True	IndivQLearningParticleDNNOnlyOneHotMoreSeeds2/52_1_12_slugs_centralized	slugs_centralized	shields/momentum_shield	0.05
IndivQLearningParticleDNNOnlyOneHotMoreSeeds2/52_1_12	slugs_decentralized	shields/momentum_shield	True	-10	True	ParticleMomentum	False	False	10	-30	Individual_Deep_Q	1.0	simple_mlp	True	0.05	2500000	22	True	IndivQLearningParticleDNNOnlyOneHotMoreSeeds2/52_1_12_slugs_decentralized	slugs_decentralized	shields/momentum_shield	0.05
IndivQLearningParticleDNNOnlyOneHotMoreSeeds2/52_1_12	slugs_decentralized	shields/momentum_shield	True	-10	True	ParticleMomentum	False	False	10	-30	Individual_Deep_Q	1.0	simple_mlp	True	0.05	2500000	22	True	IndivQLearningParticleDNNOnlyOneHotMoreSeeds2/52_1_12_none	none		0.05
IndivQLearningParticleDNNOnlyOneHotMoreSeeds2/53_1_13	slugs_decentralized	shields/momentum_shield	True	-10	True	ParticleMomentum	False	False	10	-30	Individual_Deep_Q	1.0	simple_mlp	True	0.05	2500000	23	True	IndivQLearningParticleDNNOnlyOneHotMoreSeeds2/53_1_13_slugs_centralized	slugs_centralized	shields/momentum_shield	0.05
IndivQLearningParticleDNNOnlyOneHotMoreSeeds2/53_1_13	slugs_decentralized	shields/momentum_shield	True	-10	True	ParticleMomentum	False	False	10	-30	Individual_Deep_Q	1.0	simple_mlp	True	0.05	2500000	23	True	IndivQLearningParticleDNNOnlyOneHotMoreSeeds2/53_1_13_slugs_decentralized	slugs_decentralized	shields/momentum_shield	0.05
IndivQLearningParticleDNNOnlyOneHotMoreSeeds2/53_1_13	slugs_decentralized	shields/momentum_shield	True	-10	True	ParticleMomentum	False	False	10	-30	Individual_Deep_Q	1.0	simple_mlp	True	0.05	2500000	23	True	IndivQLearningParticleDNNOnlyOneHotMoreSeeds2/53_1_13_none	none		0.05
IndivQLearningParticleDNNOnlyOneHotMoreSeeds2/54_1_14	slugs_decentralized	shields/momentum_shield	True	-10	True	ParticleMomentum	False	False	10	-30	Individual_Deep_Q	1.0	simple_mlp	True	0.05	2500000	24	True	IndivQLearningParticleDNNOnlyOneHotMoreSeeds2/54_1_14_slugs_centralized	slugs_centralized	shields/momentum_shield	0.05
IndivQLearningParticleDNNOnlyOneHotMoreSeeds2/54_1_14	slugs_decentralized	shields/momentum_shield	True	-10	True	ParticleMomentum	False	False	10	-30	Individual_Deep_Q	1.0	simple_mlp	True	0.05	2500000	24	True	IndivQLearningParticleDNNOnlyOneHotMoreSeeds2/54_1_14_slugs_decentralized	slugs_decentralized	shields/momentum_shield	0.05
IndivQLearningParticleDNNOnlyOneHotMoreSeeds2/54_1_14	slugs_decentralized	shields/momentum_shield	True	-10	True	ParticleMomentum	False	False	10	-30	Individual_Deep_Q	1.0	simple_mlp	True	0.05	2500000	24	True	IndivQLearningParticleDNNOnlyOneHotMoreSeeds2/54_1_14_none	none		0.05
IndivQLearningParticleDNNOnlyOneHotMoreSeeds2/55_1_15	slugs_decentralized	shields/momentum_shield	True	-10	True	ParticleMomentum	False	False	10	-30	Individual_Deep_Q	1.0	simple_mlp	True	0.05	2500000	25	True	IndivQLearningParticleDNNOnlyOneHotMoreSeeds2/55_1_15_slugs_centralized	slugs_centralized	shields/momentum_shield	0.05
IndivQLearningParticleDNNOnlyOneHotMoreSeeds2/55_1_15	slugs_decentralized	shields/momentum_shield	True	-10	True	ParticleMomentum	False	False	10	-30	Individual_Deep_Q	1.0	simple_mlp	True	0.05	2500000	25	True	IndivQLearningParticleDNNOnlyOneHotMoreSeeds2/55_1_15_slugs_decentralized	slugs_decentralized	shields/momentum_shield	0.05
IndivQLearningParticleDNNOnlyOneHotMoreSeeds2/55_1_15	slugs_decentralized	shields/momentum_shield	True	-10	True	ParticleMomentum	False	False	10	-30	Individual_Deep_Q	1.0	simple_mlp	True	0.05	2500000	25	True	IndivQLearningParticleDNNOnlyOneHotMoreSeeds2/55_1_15_none	none		0.05
IndivQLearningParticleDNNOnlyOneHotMoreSeeds2/56_1_16	slugs_decentralized	shields/momentum_shield	True	-10	True	ParticleMomentum	False	False	10	-30	Individual_Deep_Q	1.0	simple_mlp	True	0.05	2500000	26	True	IndivQLearningParticleDNNOnlyOneHotMoreSeeds2/56_1_16_slugs_centralized	slugs_centralized	shields/momentum_shield	0.05
IndivQLearningParticleDNNOnlyOneHotMoreSeeds2/56_1_16	slugs_decentralized	shields/momentum_shield	True	-10	True	ParticleMomentum	False	False	10	-30	Individual_Deep_Q	1.0	simple_mlp	True	0.05	2500000	26	True	IndivQLearningParticleDNNOnlyOneHotMoreSeeds2/56_1_16_slugs_decentralized	slugs_decentralized	shields/momentum_shield	0.05
IndivQLearningParticleDNNOnlyOneHotMoreSeeds2/56_1_16	slugs_decentralized	shields/momentum_shield	True	-10	True	ParticleMomentum	False	False	10	-30	Individual_Deep_Q	1.0	simple_mlp	True	0.05	2500000	26	True	IndivQLearningParticleDNNOnlyOneHotMoreSeeds2/56_1_16_none	none		0.05
IndivQLearningParticleDNNOnlyOneHotMoreSeeds2/57_1_17	slugs_decentralized	shields/momentum_shield	True	-10	True	ParticleMomentum	False	False	10	-30	Individual_Deep_Q	1.0	simple_mlp	True	0.05	2500000	27	True	IndivQLearningParticleDNNOnlyOneHotMoreSeeds2/57_1_17_slugs_centralized	slugs_centralized	shields/momentum_shield	0.05
IndivQLearningParticleDNNOnlyOneHotMoreSeeds2/57_1_17	slugs_decentralized	shields/momentum_shield	True	-10	True	ParticleMomentum	False	False	10	-30	Individual_Deep_Q	1.0	simple_mlp	True	0.05	2500000	27	True	IndivQLearningParticleDNNOnlyOneHotMoreSeeds2/57_1_17_slugs_decentralized	slugs_decentralized	shields/momentum_shield	0.05
IndivQLearningParticleDNNOnlyOneHotMoreSeeds2/57_1_17	slugs_decentralized	shields/momentum_shield	True	-10	True	ParticleMomentum	False	False	10	-30	Individual_Deep_Q	1.0	simple_mlp	True	0.05	2500000	27	True	IndivQLearningParticleDNNOnlyOneHotMoreSeeds2/57_1_17_none	none		0.05
IndivQLearningParticleDNNOnlyOneHotMoreSeeds2/58_1_18	slugs_decentralized	shields/momentum_shield	True	-10	True	ParticleMomentum	False	False	10	-30	Individual_Deep_Q	1.0	simple_mlp	True	0.05	2500000	28	True	IndivQLearningParticleDNNOnlyOneHotMoreSeeds2/58_1_18_slugs_centralized	slugs_centralized	shields/momentum_shield	0.05
IndivQLearningParticleDNNOnlyOneHotMoreSeeds2/58_1_18	slugs_decentralized	shields/momentum_shield	True	-10	True	ParticleMomentum	False	False	10	-30	Individual_Deep_Q	1.0	simple_mlp	True	0.05	2500000	28	True	IndivQLearningParticleDNNOnlyOneHotMoreSeeds2/58_1_18_slugs_decentralized	slugs_decentralized	shields/momentum_shield	0.05
IndivQLearningParticleDNNOnlyOneHotMoreSeeds2/58_1_18	slugs_decentralized	shields/momentum_shield	True	-10	True	ParticleMomentum	False	False	10	-30	Individual_Deep_Q	1.0	simple_mlp	True	0.05	2500000	28	True	IndivQLearningParticleDNNOnlyOneHotMoreSeeds2/58_1_18_none	none		0.05
IndivQLearningParticleDNNOnlyOneHotMoreSeeds2/59_1_19	slugs_decentralized	shields/momentum_shield	True	-10	True	ParticleMomentum	False	False	10	-30	Individual_Deep_Q	1.0	simple_mlp	True	0.05	2500000	29	True	IndivQLearningParticleDNNOnlyOneHotMoreSeeds2/59_1_19_slugs_centralized	slugs_centralized	shields/momentum_shield	0.05
IndivQLearningParticleDNNOnlyOneHotMoreSeeds2/59_1_19	slugs_decentralized	shields/momentum_shield	True	-10	True	ParticleMomentum	False	False	10	-30	Individual_Deep_Q	1.0	simple_mlp	True	0.05	2500000	29	True	IndivQLearningParticleDNNOnlyOneHotMoreSeeds2/59_1_19_slugs_decentralized	slugs_decentralized	shields/momentum_shield	0.05
IndivQLearningParticleDNNOnlyOneHotMoreSeeds2/59_1_19	slugs_decentralized	shields/momentum_shield	True	-10	True	ParticleMomentum	False	False	10	-30	Individual_Deep_Q	1.0	simple_mlp	True	0.05	2500000	29	True	IndivQLearningParticleDNNOnlyOneHotMoreSeeds2/59_1_19_none	none		0.05
IndivQLearningParticleDNNOnlyOneHotMoreSeeds2/60_1_20	slugs_decentralized	shields/momentum_shield	True	-10	True	ParticleMomentum	False	False	10	-30	Individual_Deep_Q	1.0	simple_mlp	True	0.05	2500000	30	True	IndivQLearningParticleDNNOnlyOneHotMoreSeeds2/60_1_20_slugs_centralized	slugs_centralized	shields/momentum_shield	0.05
IndivQLearningParticleDNNOnlyOneHotMoreSeeds2/60_1_20	slugs_decentralized	shields/momentum_shield	True	-10	True	ParticleMomentum	False	False	10	-30	Individual_Deep_Q	1.0	simple_mlp	True	0.05	2500000	30	True	IndivQLearningParticleDNNOnlyOneHotMoreSeeds2/60_1_20_slugs_decentralized	slugs_decentralized	shields/momentum_shield	0.05
IndivQLearningParticleDNNOnlyOneHotMoreSeeds2/60_1_20	slugs_decentralized	shields/momentum_shield	True	-10	True	ParticleMomentum	False	False	10	-30	Individual_Deep_Q	1.0	simple_mlp	True	0.05	2500000	30	True	IndivQLearningParticleDNNOnlyOneHotMoreSeeds2/60_1_20_none	none		0.05
IndivQLearningParticleDNNOnlyOneHotMoreSeeds2/61_1_21	slugs_decentralized	shields/momentum_shield	True	-10	True	ParticleMomentum	False	False	10	-30	Individual_Deep_Q	1.0	simple_mlp	True	0.05	2500000	31	True	IndivQLearningParticleDNNOnlyOneHotMoreSeeds2/61_1_21_slugs_centralized	slugs_centralized	shields/momentum_shield	0.05
IndivQLearningParticleDNNOnlyOneHotMoreSeeds2/61_1_21	slugs_decentralized	shields/momentum_shield	True	-10	True	ParticleMomentum	False	False	10	-30	Individual_Deep_Q	1.0	simple_mlp	True	0.05	2500000	31	True	IndivQLearningParticleDNNOnlyOneHotMoreSeeds2/61_1_21_slugs_decentralized	slugs_decentralized	shields/momentum_shield	0.05
IndivQLearningParticleDNNOnlyOneHotMoreSeeds2/61_1_21	slugs_decentralized	shields/momentum_shield	True	-10	True	ParticleMomentum	False	False	10	-30	Individual_Deep_Q	1.0	simple_mlp	True	0.05	2500000	31	True	IndivQLearningParticleDNNOnlyOneHotMoreSeeds2/61_1_21_none	none		0.05
IndivQLearningParticleDNNOnlyOneHotMoreSeeds2/62_1_22	slugs_decentralized	shields/momentum_shield	True	-10	True	ParticleMomentum	False	False	10	-30	Individual_Deep_Q	1.0	simple_mlp	True	0.05	2500000	32	True	IndivQLearningParticleDNNOnlyOneHotMoreSeeds2/62_1_22_slugs_centralized	slugs_centralized	shields/momentum_shield	0.05
IndivQLearningParticleDNNOnlyOneHotMoreSeeds2/62_1_22	slugs_decentralized	shields/momentum_shield	True	-10	True	ParticleMomentum	False	False	10	-30	Individual_Deep_Q	1.0	simple_mlp	True	0.05	2500000	32	True	IndivQLearningParticleDNNOnlyOneHotMoreSeeds2/62_1_22_slugs_decentralized	slugs_decentralized	shields/momentum_shield	0.05
IndivQLearningParticleDNNOnlyOneHotMoreSeeds2/62_1_22	slugs_decentralized	shields/momentum_shield	True	-10	True	ParticleMomentum	False	False	10	-30	Individual_Deep_Q	1.0	simple_mlp	True	0.05	2500000	32	True	IndivQLearningParticleDNNOnlyOneHotMoreSeeds2/62_1_22_none	none		0.05
IndivQLearningParticleDNNOnlyOneHotMoreSeeds2/63_1_23	slugs_decentralized	shields/momentum_shield	True	-10	True	ParticleMomentum	False	False	10	-30	Individual_Deep_Q	1.0	simple_mlp	True	0.05	2500000	33	True	IndivQLearningParticleDNNOnlyOneHotMoreSeeds2/63_1_23_slugs_centralized	slugs_centralized	shields/momentum_shield	0.05
IndivQLearningParticleDNNOnlyOneHotMoreSeeds2/63_1_23	slugs_decentralized	shields/momentum_shield	True	-10	True	ParticleMomentum	False	False	10	-30	Individual_Deep_Q	1.0	simple_mlp	True	0.05	2500000	33	True	IndivQLearningParticleDNNOnlyOneHotMoreSeeds2/63_1_23_slugs_decentralized	slugs_decentralized	shields/momentum_shield	0.05
IndivQLearningParticleDNNOnlyOneHotMoreSeeds2/63_1_23	slugs_decentralized	shields/momentum_shield	True	-10	True	ParticleMomentum	False	False	10	-30	Individual_Deep_Q	1.0	simple_mlp	True	0.05	2500000	33	True	IndivQLearningParticleDNNOnlyOneHotMoreSeeds2/63_1_23_none	none		0.05
IndivQLearningParticleDNNOnlyOneHotMoreSeeds2/64_1_24	slugs_decentralized	shields/momentum_shield	True	-10	True	ParticleMomentum	False	False	10	-30	Individual_Deep_Q	1.0	simple_mlp	True	0.05	2500000	34	True	IndivQLearningParticleDNNOnlyOneHotMoreSeeds2/64_1_24_slugs_centralized	slugs_centralized	shields/momentum_shield	0.05
IndivQLearningParticleDNNOnlyOneHotMoreSeeds2/64_1_24	slugs_decentralized	shields/momentum_shield	True	-10	True	ParticleMomentum	False	False	10	-30	Individual_Deep_Q	1.0	simple_mlp	True	0.05	2500000	34	True	IndivQLearningParticleDNNOnlyOneHotMoreSeeds2/64_1_24_slugs_decentralized	slugs_decentralized	shields/momentum_shield	0.05
IndivQLearningParticleDNNOnlyOneHotMoreSeeds2/64_1_24	slugs_decentralized	shields/momentum_shield	True	-10	True	ParticleMomentum	False	False	10	-30	Individual_Deep_Q	1.0	simple_mlp	True	0.05	2500000	34	True	IndivQLearningParticleDNNOnlyOneHotMoreSeeds2/64_1_24_none	none		0.05
IndivQLearningParticleDNNOnlyOneHotMoreSeeds2/65_1_25	slugs_decentralized	shields/momentum_shield	True	-10	True	ParticleMomentum	False	False	10	-30	Individual_Deep_Q	1.0	simple_mlp	True	0.05	2500000	35	True	IndivQLearningParticleDNNOnlyOneHotMoreSeeds2/65_1_25_slugs_centralized	slugs_centralized	shields/momentum_shield	0.05
IndivQLearningParticleDNNOnlyOneHotMoreSeeds2/65_1_25	slugs_decentralized	shields/momentum_shield	True	-10	True	ParticleMomentum	False	False	10	-30	Individual_Deep_Q	1.0	simple_mlp	True	0.05	2500000	35	True	IndivQLearningParticleDNNOnlyOneHotMoreSeeds2/65_1_25_slugs_decentralized	slugs_decentralized	shields/momentum_shield	0.05
IndivQLearningParticleDNNOnlyOneHotMoreSeeds2/65_1_25	slugs_decentralized	shields/momentum_shield	True	-10	True	ParticleMomentum	False	False	10	-30	Individual_Deep_Q	1.0	simple_mlp	True	0.05	2500000	35	True	IndivQLearningParticleDNNOnlyOneHotMoreSeeds2/65_1_25_none	none		0.05
IndivQLearningParticleDNNOnlyOneHotMoreSeeds2/66_1_26	slugs_decentralized	shields/momentum_shield	True	-10	True	ParticleMomentum	False	False	10	-30	Individual_Deep_Q	1.0	simple_mlp	True	0.05	2500000	36	True	IndivQLearningParticleDNNOnlyOneHotMoreSeeds2/66_1_26_slugs_centralized	slugs_centralized	shields/momentum_shield	0.05
IndivQLearningParticleDNNOnlyOneHotMoreSeeds2/66_1_26	slugs_decentralized	shields/momentum_shield	True	-10	True	ParticleMomentum	False	False	10	-30	Individual_Deep_Q	1.0	simple_mlp	True	0.05	2500000	36	True	IndivQLearningParticleDNNOnlyOneHotMoreSeeds2/66_1_26_slugs_decentralized	slugs_decentralized	shields/momentum_shield	0.05
IndivQLearningParticleDNNOnlyOneHotMoreSeeds2/66_1_26	slugs_decentralized	shields/momentum_shield	True	-10	True	ParticleMomentum	False	False	10	-30	Individual_Deep_Q	1.0	simple_mlp	True	0.05	2500000	36	True	IndivQLearningParticleDNNOnlyOneHotMoreSeeds2/66_1_26_none	none		0.05
IndivQLearningParticleDNNOnlyOneHotMoreSeeds2/67_1_27	slugs_decentralized	shields/momentum_shield	True	-10	True	ParticleMomentum	False	False	10	-30	Individual_Deep_Q	1.0	simple_mlp	True	0.05	2500000	37	True	IndivQLearningParticleDNNOnlyOneHotMoreSeeds2/67_1_27_slugs_centralized	slugs_centralized	shields/momentum_shield	0.05
IndivQLearningParticleDNNOnlyOneHotMoreSeeds2/67_1_27	slugs_decentralized	shields/momentum_shield	True	-10	True	ParticleMomentum	False	False	10	-30	Individual_Deep_Q	1.0	simple_mlp	True	0.05	2500000	37	True	IndivQLearningParticleDNNOnlyOneHotMoreSeeds2/67_1_27_slugs_decentralized	slugs_decentralized	shields/momentum_shield	0.05
IndivQLearningParticleDNNOnlyOneHotMoreSeeds2/67_1_27	slugs_decentralized	shields/momentum_shield	True	-10	True	ParticleMomentum	False	False	10	-30	Individual_Deep_Q	1.0	simple_mlp	True	0.05	2500000	37	True	IndivQLearningParticleDNNOnlyOneHotMoreSeeds2/67_1_27_none	none		0.05
IndivQLearningParticleDNNOnlyOneHotMoreSeeds2/68_1_28	slugs_decentralized	shields/momentum_shield	True	-10	True	ParticleMomentum	False	False	10	-30	Individual_Deep_Q	1.0	simple_mlp	True	0.05	2500000	38	True	IndivQLearningParticleDNNOnlyOneHotMoreSeeds2/68_1_28_slugs_centralized	slugs_centralized	shields/momentum_shield	0.05
IndivQLearningParticleDNNOnlyOneHotMoreSeeds2/68_1_28	slugs_decentralized	shields/momentum_shield	True	-10	True	ParticleMomentum	False	False	10	-30	Individual_Deep_Q	1.0	simple_mlp	True	0.05	2500000	38	True	IndivQLearningParticleDNNOnlyOneHotMoreSeeds2/68_1_28_slugs_decentralized	slugs_decentralized	shields/momentum_shield	0.05
IndivQLearningParticleDNNOnlyOneHotMoreSeeds2/68_1_28	slugs_decentralized	shields/momentum_shield	True	-10	True	ParticleMomentum	False	False	10	-30	Individual_Deep_Q	1.0	simple_mlp	True	0.05	2500000	38	True	IndivQLearningParticleDNNOnlyOneHotMoreSeeds2/68_1_28_none	none		0.05
IndivQLearningParticleDNNOnlyOneHotMoreSeeds2/69_1_29	slugs_decentralized	shields/momentum_shield	True	-10	True	ParticleMomentum	False	False	10	-30	Individual_Deep_Q	1.0	simple_mlp	True	0.05	2500000	39	True	IndivQLearningParticleDNNOnlyOneHotMoreSeeds2/69_1_29_slugs_centralized	slugs_centralized	shields/momentum_shield	0.05
IndivQLearningParticleDNNOnlyOneHotMoreSeeds2/69_1_29	slugs_decentralized	shields/momentum_shield	True	-10	True	ParticleMomentum	False	False	10	-30	Individual_Deep_Q	1.0	simple_mlp	True	0.05	2500000	39	True	IndivQLearningParticleDNNOnlyOneHotMoreSeeds2/69_1_29_slugs_decentralized	slugs_decentralized	shields/momentum_shield	0.05
IndivQLearningParticleDNNOnlyOneHotMoreSeeds2/69_1_29	slugs_decentralized	shields/momentum_shield	True	-10	True	ParticleMomentum	False	False	10	-30	Individual_Deep_Q	1.0	simple_mlp	True	0.05	2500000	39	True	IndivQLearningParticleDNNOnlyOneHotMoreSeeds2/69_1_29_none	none		0.05
IndivQLearningParticleDNNOnlyOneHotMoreSeeds2/70_1_30	slugs_decentralized	shields/momentum_shield	True	-10	True	ParticleMomentum	False	False	10	-30	Individual_Deep_Q	1.0	simple_mlp	True	0.05	2500000	40	True	IndivQLearningParticleDNNOnlyOneHotMoreSeeds2/70_1_30_slugs_centralized	slugs_centralized	shields/momentum_shield	0.05
IndivQLearningParticleDNNOnlyOneHotMoreSeeds2/70_1_30	slugs_decentralized	shields/momentum_shield	True	-10	True	ParticleMomentum	False	False	10	-30	Individual_Deep_Q	1.0	simple_mlp	True	0.05	2500000	40	True	IndivQLearningParticleDNNOnlyOneHotMoreSeeds2/70_1_30_slugs_decentralized	slugs_decentralized	shields/momentum_shield	0.05
IndivQLearningParticleDNNOnlyOneHotMoreSeeds2/70_1_30	slugs_decentralized	shields/momentum_shield	True	-10	True	ParticleMomentum	False	False	10	-30	Individual_Deep_Q	1.0	simple_mlp	True	0.05	2500000	40	True	IndivQLearningParticleDNNOnlyOneHotMoreSeeds2/70_1_30_none	none		0.05
IndivQLearningParticleDNNOnlyOneHotMoreSeeds2/71_1_31	slugs_decentralized	shields/momentum_shield	True	-10	True	ParticleMomentum	False	False	10	-30	Individual_Deep_Q	1.0	simple_mlp	True	0.05	2500000	41	True	IndivQLearningParticleDNNOnlyOneHotMoreSeeds2/71_1_31_slugs_centralized	slugs_centralized	shields/momentum_shield	0.05
IndivQLearningParticleDNNOnlyOneHotMoreSeeds2/71_1_31	slugs_decentralized	shields/momentum_shield	True	-10	True	ParticleMomentum	False	False	10	-30	Individual_Deep_Q	1.0	simple_mlp	True	0.05	2500000	41	True	IndivQLearningParticleDNNOnlyOneHotMoreSeeds2/71_1_31_slugs_decentralized	slugs_decentralized	shields/momentum_shield	0.05
IndivQLearningParticleDNNOnlyOneHotMoreSeeds2/71_1_31	slugs_decentralized	shields/momentum_shield	True	-10	True	ParticleMomentum	False	False	10	-30	Individual_Deep_Q	1.0	simple_mlp	True	0.05	2500000	41	True	IndivQLearningParticleDNNOnlyOneHotMoreSeeds2/71_1_31_none	none		0.05
IndivQLearningParticleDNNOnlyOneHotMoreSeeds2/72_1_32	slugs_decentralized	shields/momentum_shield	True	-10	True	ParticleMomentum	False	False	10	-30	Individual_Deep_Q	1.0	simple_mlp	True	0.05	2500000	42	True	IndivQLearningParticleDNNOnlyOneHotMoreSeeds2/72_1_32_slugs_centralized	slugs_centralized	shields/momentum_shield	0.05
IndivQLearningParticleDNNOnlyOneHotMoreSeeds2/72_1_32	slugs_decentralized	shields/momentum_shield	True	-10	True	ParticleMomentum	False	False	10	-30	Individual_Deep_Q	1.0	simple_mlp	True	0.05	2500000	42	True	IndivQLearningParticleDNNOnlyOneHotMoreSeeds2/72_1_32_slugs_decentralized	slugs_decentralized	shields/momentum_shield	0.05
IndivQLearningParticleDNNOnlyOneHotMoreSeeds2/72_1_32	slugs_decentralized	shields/momentum_shield	True	-10	True	ParticleMomentum	False	False	10	-30	Individual_Deep_Q	1.0	simple_mlp	True	0.05	2500000	42	True	IndivQLearningParticleDNNOnlyOneHotMoreSeeds2/72_1_32_none	none		0.05
IndivQLearningParticleDNNOnlyOneHotMoreSeeds2/73_1_33	slugs_decentralized	shields/momentum_shield	True	-10	True	ParticleMomentum	False	False	10	-30	Individual_Deep_Q	1.0	simple_mlp	True	0.05	2500000	43	True	IndivQLearningParticleDNNOnlyOneHotMoreSeeds2/73_1_33_slugs_centralized	slugs_centralized	shields/momentum_shield	0.05
IndivQLearningParticleDNNOnlyOneHotMoreSeeds2/73_1_33	slugs_decentralized	shields/momentum_shield	True	-10	True	ParticleMomentum	False	False	10	-30	Individual_Deep_Q	1.0	simple_mlp	True	0.05	2500000	43	True	IndivQLearningParticleDNNOnlyOneHotMoreSeeds2/73_1_33_slugs_decentralized	slugs_decentralized	shields/momentum_shield	0.05
IndivQLearningParticleDNNOnlyOneHotMoreSeeds2/73_1_33	slugs_decentralized	shields/momentum_shield	True	-10	True	ParticleMomentum	False	False	10	-30	Individual_Deep_Q	1.0	simple_mlp	True	0.05	2500000	43	True	IndivQLearningParticleDNNOnlyOneHotMoreSeeds2/73_1_33_none	none		0.05
IndivQLearningParticleDNNOnlyOneHotMoreSeeds2/74_1_34	slugs_decentralized	shields/momentum_shield	True	-10	True	ParticleMomentum	False	False	10	-30	Individual_Deep_Q	1.0	simple_mlp	True	0.05	2500000	44	True	IndivQLearningParticleDNNOnlyOneHotMoreSeeds2/74_1_34_slugs_centralized	slugs_centralized	shields/momentum_shield	0.05
IndivQLearningParticleDNNOnlyOneHotMoreSeeds2/74_1_34	slugs_decentralized	shields/momentum_shield	True	-10	True	ParticleMomentum	False	False	10	-30	Individual_Deep_Q	1.0	simple_mlp	True	0.05	2500000	44	True	IndivQLearningParticleDNNOnlyOneHotMoreSeeds2/74_1_34_slugs_decentralized	slugs_decentralized	shields/momentum_shield	0.05
IndivQLearningParticleDNNOnlyOneHotMoreSeeds2/74_1_34	slugs_decentralized	shields/momentum_shield	True	-10	True	ParticleMomentum	False	False	10	-30	Individual_Deep_Q	1.0	simple_mlp	True	0.05	2500000	44	True	IndivQLearningParticleDNNOnlyOneHotMoreSeeds2/74_1_34_none	none		0.05
IndivQLearningParticleDNNOnlyOneHotMoreSeeds2/75_1_35	slugs_decentralized	shields/momentum_shield	True	-10	True	ParticleMomentum	False	False	10	-30	Individual_Deep_Q	1.0	simple_mlp	True	0.05	2500000	45	True	IndivQLearningParticleDNNOnlyOneHotMoreSeeds2/75_1_35_slugs_centralized	slugs_centralized	shields/momentum_shield	0.05
IndivQLearningParticleDNNOnlyOneHotMoreSeeds2/75_1_35	slugs_decentralized	shields/momentum_shield	True	-10	True	ParticleMomentum	False	False	10	-30	Individual_Deep_Q	1.0	simple_mlp	True	0.05	2500000	45	True	IndivQLearningParticleDNNOnlyOneHotMoreSeeds2/75_1_35_slugs_decentralized	slugs_decentralized	shields/momentum_shield	0.05
IndivQLearningParticleDNNOnlyOneHotMoreSeeds2/75_1_35	slugs_decentralized	shields/momentum_shield	True	-10	True	ParticleMomentum	False	False	10	-30	Individual_Deep_Q	1.0	simple_mlp	True	0.05	2500000	45	True	IndivQLearningParticleDNNOnlyOneHotMoreSeeds2/75_1_35_none	none		0.05
IndivQLearningParticleDNNOnlyOneHotMoreSeeds2/76_1_36	slugs_decentralized	shields/momentum_shield	True	-10	True	ParticleMomentum	False	False	10	-30	Individual_Deep_Q	1.0	simple_mlp	True	0.05	2500000	46	True	IndivQLearningParticleDNNOnlyOneHotMoreSeeds2/76_1_36_slugs_centralized	slugs_centralized	shields/momentum_shield	0.05
IndivQLearningParticleDNNOnlyOneHotMoreSeeds2/76_1_36	slugs_decentralized	shields/momentum_shield	True	-10	True	ParticleMomentum	False	False	10	-30	Individual_Deep_Q	1.0	simple_mlp	True	0.05	2500000	46	True	IndivQLearningParticleDNNOnlyOneHotMoreSeeds2/76_1_36_slugs_decentralized	slugs_decentralized	shields/momentum_shield	0.05
IndivQLearningParticleDNNOnlyOneHotMoreSeeds2/76_1_36	slugs_decentralized	shields/momentum_shield	True	-10	True	ParticleMomentum	False	False	10	-30	Individual_Deep_Q	1.0	simple_mlp	True	0.05	2500000	46	True	IndivQLearningParticleDNNOnlyOneHotMoreSeeds2/76_1_36_none	none		0.05
IndivQLearningParticleDNNOnlyOneHotMoreSeeds2/77_1_37	slugs_decentralized	shields/momentum_shield	True	-10	True	ParticleMomentum	False	False	10	-30	Individual_Deep_Q	1.0	simple_mlp	True	0.05	2500000	47	True	IndivQLearningParticleDNNOnlyOneHotMoreSeeds2/77_1_37_slugs_centralized	slugs_centralized	shields/momentum_shield	0.05
IndivQLearningParticleDNNOnlyOneHotMoreSeeds2/77_1_37	slugs_decentralized	shields/momentum_shield	True	-10	True	ParticleMomentum	False	False	10	-30	Individual_Deep_Q	1.0	simple_mlp	True	0.05	2500000	47	True	IndivQLearningParticleDNNOnlyOneHotMoreSeeds2/77_1_37_slugs_decentralized	slugs_decentralized	shields/momentum_shield	0.05
IndivQLearningParticleDNNOnlyOneHotMoreSeeds2/77_1_37	slugs_decentralized	shields/momentum_shield	True	-10	True	ParticleMomentum	False	False	10	-30	Individual_Deep_Q	1.0	simple_mlp	True	0.05	2500000	47	True	IndivQLearningParticleDNNOnlyOneHotMoreSeeds2/77_1_37_none	none		0.05
IndivQLearningParticleDNNOnlyOneHotMoreSeeds2/78_1_38	slugs_decentralized	shields/momentum_shield	True	-10	True	ParticleMomentum	False	False	10	-30	Individual_Deep_Q	1.0	simple_mlp	True	0.05	2500000	48	True	IndivQLearningParticleDNNOnlyOneHotMoreSeeds2/78_1_38_slugs_centralized	slugs_centralized	shields/momentum_shield	0.05
IndivQLearningParticleDNNOnlyOneHotMoreSeeds2/78_1_38	slugs_decentralized	shields/momentum_shield	True	-10	True	ParticleMomentum	False	False	10	-30	Individual_Deep_Q	1.0	simple_mlp	True	0.05	2500000	48	True	IndivQLearningParticleDNNOnlyOneHotMoreSeeds2/78_1_38_slugs_decentralized	slugs_decentralized	shields/momentum_shield	0.05
IndivQLearningParticleDNNOnlyOneHotMoreSeeds2/78_1_38	slugs_decentralized	shields/momentum_shield	True	-10	True	ParticleMomentum	False	False	10	-30	Individual_Deep_Q	1.0	simple_mlp	True	0.05	2500000	48	True	IndivQLearningParticleDNNOnlyOneHotMoreSeeds2/78_1_38_none	none		0.05
IndivQLearningParticleDNNOnlyOneHotMoreSeeds2/79_1_39	slugs_decentralized	shields/momentum_shield	True	-10	True	ParticleMomentum	False	False	10	-30	Individual_Deep_Q	1.0	simple_mlp	True	0.05	2500000	49	True	IndivQLearningParticleDNNOnlyOneHotMoreSeeds2/79_1_39_slugs_centralized	slugs_centralized	shields/momentum_shield	0.05
IndivQLearningParticleDNNOnlyOneHotMoreSeeds2/79_1_39	slugs_decentralized	shields/momentum_shield	True	-10	True	ParticleMomentum	False	False	10	-30	Individual_Deep_Q	1.0	simple_mlp	True	0.05	2500000	49	True	IndivQLearningParticleDNNOnlyOneHotMoreSeeds2/79_1_39_slugs_decentralized	slugs_decentralized	shields/momentum_shield	0.05
IndivQLearningParticleDNNOnlyOneHotMoreSeeds2/79_1_39	slugs_decentralized	shields/momentum_shield	True	-10	True	ParticleMomentum	False	False	10	-30	Individual_Deep_Q	1.0	simple_mlp	True	0.05	2500000	49	True	IndivQLearningParticleDNNOnlyOneHotMoreSeeds2/79_1_39_none	none		0.05
IndivQLearningParticleDNNOnlyOneHotMoreSeeds2/80_2_0	none		True	-10	True	ParticleMomentum	False	False	10	-30	Individual_Deep_Q	1.0	simple_mlp	True	0.05	2500000	10	True	IndivQLearningParticleDNNOnlyOneHotMoreSeeds2/80_2_0_slugs_centralized	slugs_centralized	shields/momentum_shield	0.05
IndivQLearningParticleDNNOnlyOneHotMoreSeeds2/80_2_0	none		True	-10	True	ParticleMomentum	False	False	10	-30	Individual_Deep_Q	1.0	simple_mlp	True	0.05	2500000	10	True	IndivQLearningParticleDNNOnlyOneHotMoreSeeds2/80_2_0_slugs_decentralized	slugs_decentralized	shields/momentum_shield	0.05
IndivQLearningParticleDNNOnlyOneHotMoreSeeds2/80_2_0	none		True	-10	True	ParticleMomentum	False	False	10	-30	Individual_Deep_Q	1.0	simple_mlp	True	0.05	2500000	10	True	IndivQLearningParticleDNNOnlyOneHotMoreSeeds2/80_2_0_none	none		0.05
IndivQLearningParticleDNNOnlyOneHotMoreSeeds2/81_2_1	none		True	-10	True	ParticleMomentum	False	False	10	-30	Individual_Deep_Q	1.0	simple_mlp	True	0.05	2500000	11	True	IndivQLearningParticleDNNOnlyOneHotMoreSeeds2/81_2_1_slugs_centralized	slugs_centralized	shields/momentum_shield	0.05
IndivQLearningParticleDNNOnlyOneHotMoreSeeds2/81_2_1	none		True	-10	True	ParticleMomentum	False	False	10	-30	Individual_Deep_Q	1.0	simple_mlp	True	0.05	2500000	11	True	IndivQLearningParticleDNNOnlyOneHotMoreSeeds2/81_2_1_slugs_decentralized	slugs_decentralized	shields/momentum_shield	0.05
IndivQLearningParticleDNNOnlyOneHotMoreSeeds2/81_2_1	none		True	-10	True	ParticleMomentum	False	False	10	-30	Individual_Deep_Q	1.0	simple_mlp	True	0.05	2500000	11	True	IndivQLearningParticleDNNOnlyOneHotMoreSeeds2/81_2_1_none	none		0.05
IndivQLearningParticleDNNOnlyOneHotMoreSeeds2/82_2_2	none		True	-10	True	ParticleMomentum	False	False	10	-30	Individual_Deep_Q	1.0	simple_mlp	True	0.05	2500000	12	True	IndivQLearningParticleDNNOnlyOneHotMoreSeeds2/82_2_2_slugs_centralized	slugs_centralized	shields/momentum_shield	0.05
IndivQLearningParticleDNNOnlyOneHotMoreSeeds2/82_2_2	none		True	-10	True	ParticleMomentum	False	False	10	-30	Individual_Deep_Q	1.0	simple_mlp	True	0.05	2500000	12	True	IndivQLearningParticleDNNOnlyOneHotMoreSeeds2/82_2_2_slugs_decentralized	slugs_decentralized	shields/momentum_shield	0.05
IndivQLearningParticleDNNOnlyOneHotMoreSeeds2/82_2_2	none		True	-10	True	ParticleMomentum	False	False	10	-30	Individual_Deep_Q	1.0	simple_mlp	True	0.05	2500000	12	True	IndivQLearningParticleDNNOnlyOneHotMoreSeeds2/82_2_2_none	none		0.05
IndivQLearningParticleDNNOnlyOneHotMoreSeeds2/83_2_3	none		True	-10	True	ParticleMomentum	False	False	10	-30	Individual_Deep_Q	1.0	simple_mlp	True	0.05	2500000	13	True	IndivQLearningParticleDNNOnlyOneHotMoreSeeds2/83_2_3_slugs_centralized	slugs_centralized	shields/momentum_shield	0.05
IndivQLearningParticleDNNOnlyOneHotMoreSeeds2/83_2_3	none		True	-10	True	ParticleMomentum	False	False	10	-30	Individual_Deep_Q	1.0	simple_mlp	True	0.05	2500000	13	True	IndivQLearningParticleDNNOnlyOneHotMoreSeeds2/83_2_3_slugs_decentralized	slugs_decentralized	shields/momentum_shield	0.05
IndivQLearningParticleDNNOnlyOneHotMoreSeeds2/83_2_3	none		True	-10	True	ParticleMomentum	False	False	10	-30	Individual_Deep_Q	1.0	simple_mlp	True	0.05	2500000	13	True	IndivQLearningParticleDNNOnlyOneHotMoreSeeds2/83_2_3_none	none		0.05
IndivQLearningParticleDNNOnlyOneHotMoreSeeds2/84_2_4	none		True	-10	True	ParticleMomentum	False	False	10	-30	Individual_Deep_Q	1.0	simple_mlp	True	0.05	2500000	14	True	IndivQLearningParticleDNNOnlyOneHotMoreSeeds2/84_2_4_slugs_centralized	slugs_centralized	shields/momentum_shield	0.05
IndivQLearningParticleDNNOnlyOneHotMoreSeeds2/84_2_4	none		True	-10	True	ParticleMomentum	False	False	10	-30	Individual_Deep_Q	1.0	simple_mlp	True	0.05	2500000	14	True	IndivQLearningParticleDNNOnlyOneHotMoreSeeds2/84_2_4_slugs_decentralized	slugs_decentralized	shields/momentum_shield	0.05
IndivQLearningParticleDNNOnlyOneHotMoreSeeds2/84_2_4	none		True	-10	True	ParticleMomentum	False	False	10	-30	Individual_Deep_Q	1.0	simple_mlp	True	0.05	2500000	14	True	IndivQLearningParticleDNNOnlyOneHotMoreSeeds2/84_2_4_none	none		0.05
IndivQLearningParticleDNNOnlyOneHotMoreSeeds2/85_2_5	none		True	-10	True	ParticleMomentum	False	False	10	-30	Individual_Deep_Q	1.0	simple_mlp	True	0.05	2500000	15	True	IndivQLearningParticleDNNOnlyOneHotMoreSeeds2/85_2_5_slugs_centralized	slugs_centralized	shields/momentum_shield	0.05
IndivQLearningParticleDNNOnlyOneHotMoreSeeds2/85_2_5	none		True	-10	True	ParticleMomentum	False	False	10	-30	Individual_Deep_Q	1.0	simple_mlp	True	0.05	2500000	15	True	IndivQLearningParticleDNNOnlyOneHotMoreSeeds2/85_2_5_slugs_decentralized	slugs_decentralized	shields/momentum_shield	0.05
IndivQLearningParticleDNNOnlyOneHotMoreSeeds2/85_2_5	none		True	-10	True	ParticleMomentum	False	False	10	-30	Individual_Deep_Q	1.0	simple_mlp	True	0.05	2500000	15	True	IndivQLearningParticleDNNOnlyOneHotMoreSeeds2/85_2_5_none	none		0.05
IndivQLearningParticleDNNOnlyOneHotMoreSeeds2/86_2_6	none		True	-10	True	ParticleMomentum	False	False	10	-30	Individual_Deep_Q	1.0	simple_mlp	True	0.05	2500000	16	True	IndivQLearningParticleDNNOnlyOneHotMoreSeeds2/86_2_6_slugs_centralized	slugs_centralized	shields/momentum_shield	0.05
IndivQLearningParticleDNNOnlyOneHotMoreSeeds2/86_2_6	none		True	-10	True	ParticleMomentum	False	False	10	-30	Individual_Deep_Q	1.0	simple_mlp	True	0.05	2500000	16	True	IndivQLearningParticleDNNOnlyOneHotMoreSeeds2/86_2_6_slugs_decentralized	slugs_decentralized	shields/momentum_shield	0.05
IndivQLearningParticleDNNOnlyOneHotMoreSeeds2/86_2_6	none		True	-10	True	ParticleMomentum	False	False	10	-30	Individual_Deep_Q	1.0	simple_mlp	True	0.05	2500000	16	True	IndivQLearningParticleDNNOnlyOneHotMoreSeeds2/86_2_6_none	none		0.05
IndivQLearningParticleDNNOnlyOneHotMoreSeeds2/87_2_7	none		True	-10	True	ParticleMomentum	False	False	10	-30	Individual_Deep_Q	1.0	simple_mlp	True	0.05	2500000	17	True	IndivQLearningParticleDNNOnlyOneHotMoreSeeds2/87_2_7_slugs_centralized	slugs_centralized	shields/momentum_shield	0.05
IndivQLearningParticleDNNOnlyOneHotMoreSeeds2/87_2_7	none		True	-10	True	ParticleMomentum	False	False	10	-30	Individual_Deep_Q	1.0	simple_mlp	True	0.05	2500000	17	True	IndivQLearningParticleDNNOnlyOneHotMoreSeeds2/87_2_7_slugs_decentralized	slugs_decentralized	shields/momentum_shield	0.05
IndivQLearningParticleDNNOnlyOneHotMoreSeeds2/87_2_7	none		True	-10	True	ParticleMomentum	False	False	10	-30	Individual_Deep_Q	1.0	simple_mlp	True	0.05	2500000	17	True	IndivQLearningParticleDNNOnlyOneHotMoreSeeds2/87_2_7_none	none		0.05
IndivQLearningParticleDNNOnlyOneHotMoreSeeds2/88_2_8	none		True	-10	True	ParticleMomentum	False	False	10	-30	Individual_Deep_Q	1.0	simple_mlp	True	0.05	2500000	18	True	IndivQLearningParticleDNNOnlyOneHotMoreSeeds2/88_2_8_slugs_centralized	slugs_centralized	shields/momentum_shield	0.05
IndivQLearningParticleDNNOnlyOneHotMoreSeeds2/88_2_8	none		True	-10	True	ParticleMomentum	False	False	10	-30	Individual_Deep_Q	1.0	simple_mlp	True	0.05	2500000	18	True	IndivQLearningParticleDNNOnlyOneHotMoreSeeds2/88_2_8_slugs_decentralized	slugs_decentralized	shields/momentum_shield	0.05
IndivQLearningParticleDNNOnlyOneHotMoreSeeds2/88_2_8	none		True	-10	True	ParticleMomentum	False	False	10	-30	Individual_Deep_Q	1.0	simple_mlp	True	0.05	2500000	18	True	IndivQLearningParticleDNNOnlyOneHotMoreSeeds2/88_2_8_none	none		0.05
IndivQLearningParticleDNNOnlyOneHotMoreSeeds2/89_2_9	none		True	-10	True	ParticleMomentum	False	False	10	-30	Individual_Deep_Q	1.0	simple_mlp	True	0.05	2500000	19	True	IndivQLearningParticleDNNOnlyOneHotMoreSeeds2/89_2_9_slugs_centralized	slugs_centralized	shields/momentum_shield	0.05
IndivQLearningParticleDNNOnlyOneHotMoreSeeds2/89_2_9	none		True	-10	True	ParticleMomentum	False	False	10	-30	Individual_Deep_Q	1.0	simple_mlp	True	0.05	2500000	19	True	IndivQLearningParticleDNNOnlyOneHotMoreSeeds2/89_2_9_slugs_decentralized	slugs_decentralized	shields/momentum_shield	0.05
IndivQLearningParticleDNNOnlyOneHotMoreSeeds2/89_2_9	none		True	-10	True	ParticleMomentum	False	False	10	-30	Individual_Deep_Q	1.0	simple_mlp	True	0.05	2500000	19	True	IndivQLearningParticleDNNOnlyOneHotMoreSeeds2/89_2_9_none	none		0.05
IndivQLearningParticleDNNOnlyOneHotMoreSeeds2/90_2_10	none		True	-10	True	ParticleMomentum	False	False	10	-30	Individual_Deep_Q	1.0	simple_mlp	True	0.05	2500000	20	True	IndivQLearningParticleDNNOnlyOneHotMoreSeeds2/90_2_10_slugs_centralized	slugs_centralized	shields/momentum_shield	0.05
IndivQLearningParticleDNNOnlyOneHotMoreSeeds2/90_2_10	none		True	-10	True	ParticleMomentum	False	False	10	-30	Individual_Deep_Q	1.0	simple_mlp	True	0.05	2500000	20	True	IndivQLearningParticleDNNOnlyOneHotMoreSeeds2/90_2_10_slugs_decentralized	slugs_decentralized	shields/momentum_shield	0.05
IndivQLearningParticleDNNOnlyOneHotMoreSeeds2/90_2_10	none		True	-10	True	ParticleMomentum	False	False	10	-30	Individual_Deep_Q	1.0	simple_mlp	True	0.05	2500000	20	True	IndivQLearningParticleDNNOnlyOneHotMoreSeeds2/90_2_10_none	none		0.05
IndivQLearningParticleDNNOnlyOneHotMoreSeeds2/91_2_11	none		True	-10	True	ParticleMomentum	False	False	10	-30	Individual_Deep_Q	1.0	simple_mlp	True	0.05	2500000	21	True	IndivQLearningParticleDNNOnlyOneHotMoreSeeds2/91_2_11_slugs_centralized	slugs_centralized	shields/momentum_shield	0.05
IndivQLearningParticleDNNOnlyOneHotMoreSeeds2/91_2_11	none		True	-10	True	ParticleMomentum	False	False	10	-30	Individual_Deep_Q	1.0	simple_mlp	True	0.05	2500000	21	True	IndivQLearningParticleDNNOnlyOneHotMoreSeeds2/91_2_11_slugs_decentralized	slugs_decentralized	shields/momentum_shield	0.05
IndivQLearningParticleDNNOnlyOneHotMoreSeeds2/91_2_11	none		True	-10	True	ParticleMomentum	False	False	10	-30	Individual_Deep_Q	1.0	simple_mlp	True	0.05	2500000	21	True	IndivQLearningParticleDNNOnlyOneHotMoreSeeds2/91_2_11_none	none		0.05
IndivQLearningParticleDNNOnlyOneHotMoreSeeds2/92_2_12	none		True	-10	True	ParticleMomentum	False	False	10	-30	Individual_Deep_Q	1.0	simple_mlp	True	0.05	2500000	22	True	IndivQLearningParticleDNNOnlyOneHotMoreSeeds2/92_2_12_slugs_centralized	slugs_centralized	shields/momentum_shield	0.05
IndivQLearningParticleDNNOnlyOneHotMoreSeeds2/92_2_12	none		True	-10	True	ParticleMomentum	False	False	10	-30	Individual_Deep_Q	1.0	simple_mlp	True	0.05	2500000	22	True	IndivQLearningParticleDNNOnlyOneHotMoreSeeds2/92_2_12_slugs_decentralized	slugs_decentralized	shields/momentum_shield	0.05
IndivQLearningParticleDNNOnlyOneHotMoreSeeds2/92_2_12	none		True	-10	True	ParticleMomentum	False	False	10	-30	Individual_Deep_Q	1.0	simple_mlp	True	0.05	2500000	22	True	IndivQLearningParticleDNNOnlyOneHotMoreSeeds2/92_2_12_none	none		0.05
IndivQLearningParticleDNNOnlyOneHotMoreSeeds2/93_2_13	none		True	-10	True	ParticleMomentum	False	False	10	-30	Individual_Deep_Q	1.0	simple_mlp	True	0.05	2500000	23	True	IndivQLearningParticleDNNOnlyOneHotMoreSeeds2/93_2_13_slugs_centralized	slugs_centralized	shields/momentum_shield	0.05
IndivQLearningParticleDNNOnlyOneHotMoreSeeds2/93_2_13	none		True	-10	True	ParticleMomentum	False	False	10	-30	Individual_Deep_Q	1.0	simple_mlp	True	0.05	2500000	23	True	IndivQLearningParticleDNNOnlyOneHotMoreSeeds2/93_2_13_slugs_decentralized	slugs_decentralized	shields/momentum_shield	0.05
IndivQLearningParticleDNNOnlyOneHotMoreSeeds2/93_2_13	none		True	-10	True	ParticleMomentum	False	False	10	-30	Individual_Deep_Q	1.0	simple_mlp	True	0.05	2500000	23	True	IndivQLearningParticleDNNOnlyOneHotMoreSeeds2/93_2_13_none	none		0.05
IndivQLearningParticleDNNOnlyOneHotMoreSeeds2/94_2_14	none		True	-10	True	ParticleMomentum	False	False	10	-30	Individual_Deep_Q	1.0	simple_mlp	True	0.05	2500000	24	True	IndivQLearningParticleDNNOnlyOneHotMoreSeeds2/94_2_14_slugs_centralized	slugs_centralized	shields/momentum_shield	0.05
IndivQLearningParticleDNNOnlyOneHotMoreSeeds2/94_2_14	none		True	-10	True	ParticleMomentum	False	False	10	-30	Individual_Deep_Q	1.0	simple_mlp	True	0.05	2500000	24	True	IndivQLearningParticleDNNOnlyOneHotMoreSeeds2/94_2_14_slugs_decentralized	slugs_decentralized	shields/momentum_shield	0.05
IndivQLearningParticleDNNOnlyOneHotMoreSeeds2/94_2_14	none		True	-10	True	ParticleMomentum	False	False	10	-30	Individual_Deep_Q	1.0	simple_mlp	True	0.05	2500000	24	True	IndivQLearningParticleDNNOnlyOneHotMoreSeeds2/94_2_14_none	none		0.05
IndivQLearningParticleDNNOnlyOneHotMoreSeeds2/95_2_15	none		True	-10	True	ParticleMomentum	False	False	10	-30	Individual_Deep_Q	1.0	simple_mlp	True	0.05	2500000	25	True	IndivQLearningParticleDNNOnlyOneHotMoreSeeds2/95_2_15_slugs_centralized	slugs_centralized	shields/momentum_shield	0.05
IndivQLearningParticleDNNOnlyOneHotMoreSeeds2/95_2_15	none		True	-10	True	ParticleMomentum	False	False	10	-30	Individual_Deep_Q	1.0	simple_mlp	True	0.05	2500000	25	True	IndivQLearningParticleDNNOnlyOneHotMoreSeeds2/95_2_15_slugs_decentralized	slugs_decentralized	shields/momentum_shield	0.05
IndivQLearningParticleDNNOnlyOneHotMoreSeeds2/95_2_15	none		True	-10	True	ParticleMomentum	False	False	10	-30	Individual_Deep_Q	1.0	simple_mlp	True	0.05	2500000	25	True	IndivQLearningParticleDNNOnlyOneHotMoreSeeds2/95_2_15_none	none		0.05
IndivQLearningParticleDNNOnlyOneHotMoreSeeds2/96_2_16	none		True	-10	True	ParticleMomentum	False	False	10	-30	Individual_Deep_Q	1.0	simple_mlp	True	0.05	2500000	26	True	IndivQLearningParticleDNNOnlyOneHotMoreSeeds2/96_2_16_slugs_centralized	slugs_centralized	shields/momentum_shield	0.05
IndivQLearningParticleDNNOnlyOneHotMoreSeeds2/96_2_16	none		True	-10	True	ParticleMomentum	False	False	10	-30	Individual_Deep_Q	1.0	simple_mlp	True	0.05	2500000	26	True	IndivQLearningParticleDNNOnlyOneHotMoreSeeds2/96_2_16_slugs_decentralized	slugs_decentralized	shields/momentum_shield	0.05
IndivQLearningParticleDNNOnlyOneHotMoreSeeds2/96_2_16	none		True	-10	True	ParticleMomentum	False	False	10	-30	Individual_Deep_Q	1.0	simple_mlp	True	0.05	2500000	26	True	IndivQLearningParticleDNNOnlyOneHotMoreSeeds2/96_2_16_none	none		0.05
IndivQLearningParticleDNNOnlyOneHotMoreSeeds2/97_2_17	none		True	-10	True	ParticleMomentum	False	False	10	-30	Individual_Deep_Q	1.0	simple_mlp	True	0.05	2500000	27	True	IndivQLearningParticleDNNOnlyOneHotMoreSeeds2/97_2_17_slugs_centralized	slugs_centralized	shields/momentum_shield	0.05
IndivQLearningParticleDNNOnlyOneHotMoreSeeds2/97_2_17	none		True	-10	True	ParticleMomentum	False	False	10	-30	Individual_Deep_Q	1.0	simple_mlp	True	0.05	2500000	27	True	IndivQLearningParticleDNNOnlyOneHotMoreSeeds2/97_2_17_slugs_decentralized	slugs_decentralized	shields/momentum_shield	0.05
IndivQLearningParticleDNNOnlyOneHotMoreSeeds2/97_2_17	none		True	-10	True	ParticleMomentum	False	False	10	-30	Individual_Deep_Q	1.0	simple_mlp	True	0.05	2500000	27	True	IndivQLearningParticleDNNOnlyOneHotMoreSeeds2/97_2_17_none	none		0.05
IndivQLearningParticleDNNOnlyOneHotMoreSeeds2/98_2_18	none		True	-10	True	ParticleMomentum	False	False	10	-30	Individual_Deep_Q	1.0	simple_mlp	True	0.05	2500000	28	True	IndivQLearningParticleDNNOnlyOneHotMoreSeeds2/98_2_18_slugs_centralized	slugs_centralized	shields/momentum_shield	0.05
IndivQLearningParticleDNNOnlyOneHotMoreSeeds2/98_2_18	none		True	-10	True	ParticleMomentum	False	False	10	-30	Individual_Deep_Q	1.0	simple_mlp	True	0.05	2500000	28	True	IndivQLearningParticleDNNOnlyOneHotMoreSeeds2/98_2_18_slugs_decentralized	slugs_decentralized	shields/momentum_shield	0.05
IndivQLearningParticleDNNOnlyOneHotMoreSeeds2/98_2_18	none		True	-10	True	ParticleMomentum	False	False	10	-30	Individual_Deep_Q	1.0	simple_mlp	True	0.05	2500000	28	True	IndivQLearningParticleDNNOnlyOneHotMoreSeeds2/98_2_18_none	none		0.05
IndivQLearningParticleDNNOnlyOneHotMoreSeeds2/99_2_19	none		True	-10	True	ParticleMomentum	False	False	10	-30	Individual_Deep_Q	1.0	simple_mlp	True	0.05	2500000	29	True	IndivQLearningParticleDNNOnlyOneHotMoreSeeds2/99_2_19_slugs_centralized	slugs_centralized	shields/momentum_shield	0.05
IndivQLearningParticleDNNOnlyOneHotMoreSeeds2/99_2_19	none		True	-10	True	ParticleMomentum	False	False	10	-30	Individual_Deep_Q	1.0	simple_mlp	True	0.05	2500000	29	True	IndivQLearningParticleDNNOnlyOneHotMoreSeeds2/99_2_19_slugs_decentralized	slugs_decentralized	shields/momentum_shield	0.05
IndivQLearningParticleDNNOnlyOneHotMoreSeeds2/99_2_19	none		True	-10	True	ParticleMomentum	False	False	10	-30	Individual_Deep_Q	1.0	simple_mlp	True	0.05	2500000	29	True	IndivQLearningParticleDNNOnlyOneHotMoreSeeds2/99_2_19_none	none		0.05
IndivQLearningParticleDNNOnlyOneHotMoreSeeds2/100_2_20	none		True	-10	True	ParticleMomentum	False	False	10	-30	Individual_Deep_Q	1.0	simple_mlp	True	0.05	2500000	30	True	IndivQLearningParticleDNNOnlyOneHotMoreSeeds2/100_2_20_slugs_centralized	slugs_centralized	shields/momentum_shield	0.05
IndivQLearningParticleDNNOnlyOneHotMoreSeeds2/100_2_20	none		True	-10	True	ParticleMomentum	False	False	10	-30	Individual_Deep_Q	1.0	simple_mlp	True	0.05	2500000	30	True	IndivQLearningParticleDNNOnlyOneHotMoreSeeds2/100_2_20_slugs_decentralized	slugs_decentralized	shields/momentum_shield	0.05
IndivQLearningParticleDNNOnlyOneHotMoreSeeds2/100_2_20	none		True	-10	True	ParticleMomentum	False	False	10	-30	Individual_Deep_Q	1.0	simple_mlp	True	0.05	2500000	30	True	IndivQLearningParticleDNNOnlyOneHotMoreSeeds2/100_2_20_none	none		0.05
IndivQLearningParticleDNNOnlyOneHotMoreSeeds2/101_2_21	none		True	-10	True	ParticleMomentum	False	False	10	-30	Individual_Deep_Q	1.0	simple_mlp	True	0.05	2500000	31	True	IndivQLearningParticleDNNOnlyOneHotMoreSeeds2/101_2_21_slugs_centralized	slugs_centralized	shields/momentum_shield	0.05
IndivQLearningParticleDNNOnlyOneHotMoreSeeds2/101_2_21	none		True	-10	True	ParticleMomentum	False	False	10	-30	Individual_Deep_Q	1.0	simple_mlp	True	0.05	2500000	31	True	IndivQLearningParticleDNNOnlyOneHotMoreSeeds2/101_2_21_slugs_decentralized	slugs_decentralized	shields/momentum_shield	0.05
IndivQLearningParticleDNNOnlyOneHotMoreSeeds2/101_2_21	none		True	-10	True	ParticleMomentum	False	False	10	-30	Individual_Deep_Q	1.0	simple_mlp	True	0.05	2500000	31	True	IndivQLearningParticleDNNOnlyOneHotMoreSeeds2/101_2_21_none	none		0.05
IndivQLearningParticleDNNOnlyOneHotMoreSeeds2/102_2_22	none		True	-10	True	ParticleMomentum	False	False	10	-30	Individual_Deep_Q	1.0	simple_mlp	True	0.05	2500000	32	True	IndivQLearningParticleDNNOnlyOneHotMoreSeeds2/102_2_22_slugs_centralized	slugs_centralized	shields/momentum_shield	0.05
IndivQLearningParticleDNNOnlyOneHotMoreSeeds2/102_2_22	none		True	-10	True	ParticleMomentum	False	False	10	-30	Individual_Deep_Q	1.0	simple_mlp	True	0.05	2500000	32	True	IndivQLearningParticleDNNOnlyOneHotMoreSeeds2/102_2_22_slugs_decentralized	slugs_decentralized	shields/momentum_shield	0.05
IndivQLearningParticleDNNOnlyOneHotMoreSeeds2/102_2_22	none		True	-10	True	ParticleMomentum	False	False	10	-30	Individual_Deep_Q	1.0	simple_mlp	True	0.05	2500000	32	True	IndivQLearningParticleDNNOnlyOneHotMoreSeeds2/102_2_22_none	none		0.05
IndivQLearningParticleDNNOnlyOneHotMoreSeeds2/103_2_23	none		True	-10	True	ParticleMomentum	False	False	10	-30	Individual_Deep_Q	1.0	simple_mlp	True	0.05	2500000	33	True	IndivQLearningParticleDNNOnlyOneHotMoreSeeds2/103_2_23_slugs_centralized	slugs_centralized	shields/momentum_shield	0.05
IndivQLearningParticleDNNOnlyOneHotMoreSeeds2/103_2_23	none		True	-10	True	ParticleMomentum	False	False	10	-30	Individual_Deep_Q	1.0	simple_mlp	True	0.05	2500000	33	True	IndivQLearningParticleDNNOnlyOneHotMoreSeeds2/103_2_23_slugs_decentralized	slugs_decentralized	shields/momentum_shield	0.05
IndivQLearningParticleDNNOnlyOneHotMoreSeeds2/103_2_23	none		True	-10	True	ParticleMomentum	False	False	10	-30	Individual_Deep_Q	1.0	simple_mlp	True	0.05	2500000	33	True	IndivQLearningParticleDNNOnlyOneHotMoreSeeds2/103_2_23_none	none		0.05
IndivQLearningParticleDNNOnlyOneHotMoreSeeds2/104_2_24	none		True	-10	True	ParticleMomentum	False	False	10	-30	Individual_Deep_Q	1.0	simple_mlp	True	0.05	2500000	34	True	IndivQLearningParticleDNNOnlyOneHotMoreSeeds2/104_2_24_slugs_centralized	slugs_centralized	shields/momentum_shield	0.05
IndivQLearningParticleDNNOnlyOneHotMoreSeeds2/104_2_24	none		True	-10	True	ParticleMomentum	False	False	10	-30	Individual_Deep_Q	1.0	simple_mlp	True	0.05	2500000	34	True	IndivQLearningParticleDNNOnlyOneHotMoreSeeds2/104_2_24_slugs_decentralized	slugs_decentralized	shields/momentum_shield	0.05
IndivQLearningParticleDNNOnlyOneHotMoreSeeds2/104_2_24	none		True	-10	True	ParticleMomentum	False	False	10	-30	Individual_Deep_Q	1.0	simple_mlp	True	0.05	2500000	34	True	IndivQLearningParticleDNNOnlyOneHotMoreSeeds2/104_2_24_none	none		0.05
IndivQLearningParticleDNNOnlyOneHotMoreSeeds2/105_2_25	none		True	-10	True	ParticleMomentum	False	False	10	-30	Individual_Deep_Q	1.0	simple_mlp	True	0.05	2500000	35	True	IndivQLearningParticleDNNOnlyOneHotMoreSeeds2/105_2_25_slugs_centralized	slugs_centralized	shields/momentum_shield	0.05
IndivQLearningParticleDNNOnlyOneHotMoreSeeds2/105_2_25	none		True	-10	True	ParticleMomentum	False	False	10	-30	Individual_Deep_Q	1.0	simple_mlp	True	0.05	2500000	35	True	IndivQLearningParticleDNNOnlyOneHotMoreSeeds2/105_2_25_slugs_decentralized	slugs_decentralized	shields/momentum_shield	0.05
IndivQLearningParticleDNNOnlyOneHotMoreSeeds2/105_2_25	none		True	-10	True	ParticleMomentum	False	False	10	-30	Individual_Deep_Q	1.0	simple_mlp	True	0.05	2500000	35	True	IndivQLearningParticleDNNOnlyOneHotMoreSeeds2/105_2_25_none	none		0.05
IndivQLearningParticleDNNOnlyOneHotMoreSeeds2/106_2_26	none		True	-10	True	ParticleMomentum	False	False	10	-30	Individual_Deep_Q	1.0	simple_mlp	True	0.05	2500000	36	True	IndivQLearningParticleDNNOnlyOneHotMoreSeeds2/106_2_26_slugs_centralized	slugs_centralized	shields/momentum_shield	0.05
IndivQLearningParticleDNNOnlyOneHotMoreSeeds2/106_2_26	none		True	-10	True	ParticleMomentum	False	False	10	-30	Individual_Deep_Q	1.0	simple_mlp	True	0.05	2500000	36	True	IndivQLearningParticleDNNOnlyOneHotMoreSeeds2/106_2_26_slugs_decentralized	slugs_decentralized	shields/momentum_shield	0.05
IndivQLearningParticleDNNOnlyOneHotMoreSeeds2/106_2_26	none		True	-10	True	ParticleMomentum	False	False	10	-30	Individual_Deep_Q	1.0	simple_mlp	True	0.05	2500000	36	True	IndivQLearningParticleDNNOnlyOneHotMoreSeeds2/106_2_26_none	none		0.05
IndivQLearningParticleDNNOnlyOneHotMoreSeeds2/107_2_27	none		True	-10	True	ParticleMomentum	False	False	10	-30	Individual_Deep_Q	1.0	simple_mlp	True	0.05	2500000	37	True	IndivQLearningParticleDNNOnlyOneHotMoreSeeds2/107_2_27_slugs_centralized	slugs_centralized	shields/momentum_shield	0.05
IndivQLearningParticleDNNOnlyOneHotMoreSeeds2/107_2_27	none		True	-10	True	ParticleMomentum	False	False	10	-30	Individual_Deep_Q	1.0	simple_mlp	True	0.05	2500000	37	True	IndivQLearningParticleDNNOnlyOneHotMoreSeeds2/107_2_27_slugs_decentralized	slugs_decentralized	shields/momentum_shield	0.05
IndivQLearningParticleDNNOnlyOneHotMoreSeeds2/107_2_27	none		True	-10	True	ParticleMomentum	False	False	10	-30	Individual_Deep_Q	1.0	simple_mlp	True	0.05	2500000	37	True	IndivQLearningParticleDNNOnlyOneHotMoreSeeds2/107_2_27_none	none		0.05
IndivQLearningParticleDNNOnlyOneHotMoreSeeds2/108_2_28	none		True	-10	True	ParticleMomentum	False	False	10	-30	Individual_Deep_Q	1.0	simple_mlp	True	0.05	2500000	38	True	IndivQLearningParticleDNNOnlyOneHotMoreSeeds2/108_2_28_slugs_centralized	slugs_centralized	shields/momentum_shield	0.05
IndivQLearningParticleDNNOnlyOneHotMoreSeeds2/108_2_28	none		True	-10	True	ParticleMomentum	False	False	10	-30	Individual_Deep_Q	1.0	simple_mlp	True	0.05	2500000	38	True	IndivQLearningParticleDNNOnlyOneHotMoreSeeds2/108_2_28_slugs_decentralized	slugs_decentralized	shields/momentum_shield	0.05
IndivQLearningParticleDNNOnlyOneHotMoreSeeds2/108_2_28	none		True	-10	True	ParticleMomentum	False	False	10	-30	Individual_Deep_Q	1.0	simple_mlp	True	0.05	2500000	38	True	IndivQLearningParticleDNNOnlyOneHotMoreSeeds2/108_2_28_none	none		0.05
IndivQLearningParticleDNNOnlyOneHotMoreSeeds2/109_2_29	none		True	-10	True	ParticleMomentum	False	False	10	-30	Individual_Deep_Q	1.0	simple_mlp	True	0.05	2500000	39	True	IndivQLearningParticleDNNOnlyOneHotMoreSeeds2/109_2_29_slugs_centralized	slugs_centralized	shields/momentum_shield	0.05
IndivQLearningParticleDNNOnlyOneHotMoreSeeds2/109_2_29	none		True	-10	True	ParticleMomentum	False	False	10	-30	Individual_Deep_Q	1.0	simple_mlp	True	0.05	2500000	39	True	IndivQLearningParticleDNNOnlyOneHotMoreSeeds2/109_2_29_slugs_decentralized	slugs_decentralized	shields/momentum_shield	0.05
IndivQLearningParticleDNNOnlyOneHotMoreSeeds2/109_2_29	none		True	-10	True	ParticleMomentum	False	False	10	-30	Individual_Deep_Q	1.0	simple_mlp	True	0.05	2500000	39	True	IndivQLearningParticleDNNOnlyOneHotMoreSeeds2/109_2_29_none	none		0.05
IndivQLearningParticleDNNOnlyOneHotMoreSeeds2/110_2_30	none		True	-10	True	ParticleMomentum	False	False	10	-30	Individual_Deep_Q	1.0	simple_mlp	True	0.05	2500000	40	True	IndivQLearningParticleDNNOnlyOneHotMoreSeeds2/110_2_30_slugs_centralized	slugs_centralized	shields/momentum_shield	0.05
IndivQLearningParticleDNNOnlyOneHotMoreSeeds2/110_2_30	none		True	-10	True	ParticleMomentum	False	False	10	-30	Individual_Deep_Q	1.0	simple_mlp	True	0.05	2500000	40	True	IndivQLearningParticleDNNOnlyOneHotMoreSeeds2/110_2_30_slugs_decentralized	slugs_decentralized	shields/momentum_shield	0.05
IndivQLearningParticleDNNOnlyOneHotMoreSeeds2/110_2_30	none		True	-10	True	ParticleMomentum	False	False	10	-30	Individual_Deep_Q	1.0	simple_mlp	True	0.05	2500000	40	True	IndivQLearningParticleDNNOnlyOneHotMoreSeeds2/110_2_30_none	none		0.05
IndivQLearningParticleDNNOnlyOneHotMoreSeeds2/111_2_31	none		True	-10	True	ParticleMomentum	False	False	10	-30	Individual_Deep_Q	1.0	simple_mlp	True	0.05	2500000	41	True	IndivQLearningParticleDNNOnlyOneHotMoreSeeds2/111_2_31_slugs_centralized	slugs_centralized	shields/momentum_shield	0.05
IndivQLearningParticleDNNOnlyOneHotMoreSeeds2/111_2_31	none		True	-10	True	ParticleMomentum	False	False	10	-30	Individual_Deep_Q	1.0	simple_mlp	True	0.05	2500000	41	True	IndivQLearningParticleDNNOnlyOneHotMoreSeeds2/111_2_31_slugs_decentralized	slugs_decentralized	shields/momentum_shield	0.05
IndivQLearningParticleDNNOnlyOneHotMoreSeeds2/111_2_31	none		True	-10	True	ParticleMomentum	False	False	10	-30	Individual_Deep_Q	1.0	simple_mlp	True	0.05	2500000	41	True	IndivQLearningParticleDNNOnlyOneHotMoreSeeds2/111_2_31_none	none		0.05
IndivQLearningParticleDNNOnlyOneHotMoreSeeds2/112_2_32	none		True	-10	True	ParticleMomentum	False	False	10	-30	Individual_Deep_Q	1.0	simple_mlp	True	0.05	2500000	42	True	IndivQLearningParticleDNNOnlyOneHotMoreSeeds2/112_2_32_slugs_centralized	slugs_centralized	shields/momentum_shield	0.05
IndivQLearningParticleDNNOnlyOneHotMoreSeeds2/112_2_32	none		True	-10	True	ParticleMomentum	False	False	10	-30	Individual_Deep_Q	1.0	simple_mlp	True	0.05	2500000	42	True	IndivQLearningParticleDNNOnlyOneHotMoreSeeds2/112_2_32_slugs_decentralized	slugs_decentralized	shields/momentum_shield	0.05
IndivQLearningParticleDNNOnlyOneHotMoreSeeds2/112_2_32	none		True	-10	True	ParticleMomentum	False	False	10	-30	Individual_Deep_Q	1.0	simple_mlp	True	0.05	2500000	42	True	IndivQLearningParticleDNNOnlyOneHotMoreSeeds2/112_2_32_none	none		0.05
IndivQLearningParticleDNNOnlyOneHotMoreSeeds2/113_2_33	none		True	-10	True	ParticleMomentum	False	False	10	-30	Individual_Deep_Q	1.0	simple_mlp	True	0.05	2500000	43	True	IndivQLearningParticleDNNOnlyOneHotMoreSeeds2/113_2_33_slugs_centralized	slugs_centralized	shields/momentum_shield	0.05
IndivQLearningParticleDNNOnlyOneHotMoreSeeds2/113_2_33	none		True	-10	True	ParticleMomentum	False	False	10	-30	Individual_Deep_Q	1.0	simple_mlp	True	0.05	2500000	43	True	IndivQLearningParticleDNNOnlyOneHotMoreSeeds2/113_2_33_slugs_decentralized	slugs_decentralized	shields/momentum_shield	0.05
IndivQLearningParticleDNNOnlyOneHotMoreSeeds2/113_2_33	none		True	-10	True	ParticleMomentum	False	False	10	-30	Individual_Deep_Q	1.0	simple_mlp	True	0.05	2500000	43	True	IndivQLearningParticleDNNOnlyOneHotMoreSeeds2/113_2_33_none	none		0.05
IndivQLearningParticleDNNOnlyOneHotMoreSeeds2/114_2_34	none		True	-10	True	ParticleMomentum	False	False	10	-30	Individual_Deep_Q	1.0	simple_mlp	True	0.05	2500000	44	True	IndivQLearningParticleDNNOnlyOneHotMoreSeeds2/114_2_34_slugs_centralized	slugs_centralized	shields/momentum_shield	0.05
IndivQLearningParticleDNNOnlyOneHotMoreSeeds2/114_2_34	none		True	-10	True	ParticleMomentum	False	False	10	-30	Individual_Deep_Q	1.0	simple_mlp	True	0.05	2500000	44	True	IndivQLearningParticleDNNOnlyOneHotMoreSeeds2/114_2_34_slugs_decentralized	slugs_decentralized	shields/momentum_shield	0.05
IndivQLearningParticleDNNOnlyOneHotMoreSeeds2/114_2_34	none		True	-10	True	ParticleMomentum	False	False	10	-30	Individual_Deep_Q	1.0	simple_mlp	True	0.05	2500000	44	True	IndivQLearningParticleDNNOnlyOneHotMoreSeeds2/114_2_34_none	none		0.05
IndivQLearningParticleDNNOnlyOneHotMoreSeeds2/115_2_35	none		True	-10	True	ParticleMomentum	False	False	10	-30	Individual_Deep_Q	1.0	simple_mlp	True	0.05	2500000	45	True	IndivQLearningParticleDNNOnlyOneHotMoreSeeds2/115_2_35_slugs_centralized	slugs_centralized	shields/momentum_shield	0.05
IndivQLearningParticleDNNOnlyOneHotMoreSeeds2/115_2_35	none		True	-10	True	ParticleMomentum	False	False	10	-30	Individual_Deep_Q	1.0	simple_mlp	True	0.05	2500000	45	True	IndivQLearningParticleDNNOnlyOneHotMoreSeeds2/115_2_35_slugs_decentralized	slugs_decentralized	shields/momentum_shield	0.05
IndivQLearningParticleDNNOnlyOneHotMoreSeeds2/115_2_35	none		True	-10	True	ParticleMomentum	False	False	10	-30	Individual_Deep_Q	1.0	simple_mlp	True	0.05	2500000	45	True	IndivQLearningParticleDNNOnlyOneHotMoreSeeds2/115_2_35_none	none		0.05
IndivQLearningParticleDNNOnlyOneHotMoreSeeds2/116_2_36	none		True	-10	True	ParticleMomentum	False	False	10	-30	Individual_Deep_Q	1.0	simple_mlp	True	0.05	2500000	46	True	IndivQLearningParticleDNNOnlyOneHotMoreSeeds2/116_2_36_slugs_centralized	slugs_centralized	shields/momentum_shield	0.05
IndivQLearningParticleDNNOnlyOneHotMoreSeeds2/116_2_36	none		True	-10	True	ParticleMomentum	False	False	10	-30	Individual_Deep_Q	1.0	simple_mlp	True	0.05	2500000	46	True	IndivQLearningParticleDNNOnlyOneHotMoreSeeds2/116_2_36_slugs_decentralized	slugs_decentralized	shields/momentum_shield	0.05
IndivQLearningParticleDNNOnlyOneHotMoreSeeds2/116_2_36	none		True	-10	True	ParticleMomentum	False	False	10	-30	Individual_Deep_Q	1.0	simple_mlp	True	0.05	2500000	46	True	IndivQLearningParticleDNNOnlyOneHotMoreSeeds2/116_2_36_none	none		0.05
IndivQLearningParticleDNNOnlyOneHotMoreSeeds2/117_2_37	none		True	-10	True	ParticleMomentum	False	False	10	-30	Individual_Deep_Q	1.0	simple_mlp	True	0.05	2500000	47	True	IndivQLearningParticleDNNOnlyOneHotMoreSeeds2/117_2_37_slugs_centralized	slugs_centralized	shields/momentum_shield	0.05
IndivQLearningParticleDNNOnlyOneHotMoreSeeds2/117_2_37	none		True	-10	True	ParticleMomentum	False	False	10	-30	Individual_Deep_Q	1.0	simple_mlp	True	0.05	2500000	47	True	IndivQLearningParticleDNNOnlyOneHotMoreSeeds2/117_2_37_slugs_decentralized	slugs_decentralized	shields/momentum_shield	0.05
IndivQLearningParticleDNNOnlyOneHotMoreSeeds2/117_2_37	none		True	-10	True	ParticleMomentum	False	False	10	-30	Individual_Deep_Q	1.0	simple_mlp	True	0.05	2500000	47	True	IndivQLearningParticleDNNOnlyOneHotMoreSeeds2/117_2_37_none	none		0.05
IndivQLearningParticleDNNOnlyOneHotMoreSeeds2/118_2_38	none		True	-10	True	ParticleMomentum	False	False	10	-30	Individual_Deep_Q	1.0	simple_mlp	True	0.05	2500000	48	True	IndivQLearningParticleDNNOnlyOneHotMoreSeeds2/118_2_38_slugs_centralized	slugs_centralized	shields/momentum_shield	0.05
IndivQLearningParticleDNNOnlyOneHotMoreSeeds2/118_2_38	none		True	-10	True	ParticleMomentum	False	False	10	-30	Individual_Deep_Q	1.0	simple_mlp	True	0.05	2500000	48	True	IndivQLearningParticleDNNOnlyOneHotMoreSeeds2/118_2_38_slugs_decentralized	slugs_decentralized	shields/momentum_shield	0.05
IndivQLearningParticleDNNOnlyOneHotMoreSeeds2/118_2_38	none		True	-10	True	ParticleMomentum	False	False	10	-30	Individual_Deep_Q	1.0	simple_mlp	True	0.05	2500000	48	True	IndivQLearningParticleDNNOnlyOneHotMoreSeeds2/118_2_38_none	none		0.05
IndivQLearningParticleDNNOnlyOneHotMoreSeeds2/119_2_39	none		True	-10	True	ParticleMomentum	False	False	10	-30	Individual_Deep_Q	1.0	simple_mlp	True	0.05	2500000	49	True	IndivQLearningParticleDNNOnlyOneHotMoreSeeds2/119_2_39_slugs_centralized	slugs_centralized	shields/momentum_shield	0.05
IndivQLearningParticleDNNOnlyOneHotMoreSeeds2/119_2_39	none		True	-10	True	ParticleMomentum	False	False	10	-30	Individual_Deep_Q	1.0	simple_mlp	True	0.05	2500000	49	True	IndivQLearningParticleDNNOnlyOneHotMoreSeeds2/119_2_39_slugs_decentralized	slugs_decentralized	shields/momentum_shield	0.05
IndivQLearningParticleDNNOnlyOneHotMoreSeeds2/119_2_39	none		True	-10	True	ParticleMomentum	False	False	10	-30	Individual_Deep_Q	1.0	simple_mlp	True	0.05	2500000	49	True	IndivQLearningParticleDNNOnlyOneHotMoreSeeds2/119_2_39_none	none		0.05
IndivQLearningParticleDNNOnlyOneHotMoreSeeds2/120_3_0	slugs_centralized	shields/momentum_shield	True	-10	False	ParticleMomentum	False	False	10	-30	Individual_Deep_Q	1.0	simple_mlp	True	0.05	2500000	10	True	IndivQLearningParticleDNNOnlyOneHotMoreSeeds2/120_3_0_slugs_centralized	slugs_centralized	shields/momentum_shield	0.05
IndivQLearningParticleDNNOnlyOneHotMoreSeeds2/120_3_0	slugs_centralized	shields/momentum_shield	True	-10	False	ParticleMomentum	False	False	10	-30	Individual_Deep_Q	1.0	simple_mlp	True	0.05	2500000	10	True	IndivQLearningParticleDNNOnlyOneHotMoreSeeds2/120_3_0_slugs_decentralized	slugs_decentralized	shields/momentum_shield	0.05
IndivQLearningParticleDNNOnlyOneHotMoreSeeds2/120_3_0	slugs_centralized	shields/momentum_shield	True	-10	False	ParticleMomentum	False	False	10	-30	Individual_Deep_Q	1.0	simple_mlp	True	0.05	2500000	10	True	IndivQLearningParticleDNNOnlyOneHotMoreSeeds2/120_3_0_none	none		0.05
IndivQLearningParticleDNNOnlyOneHotMoreSeeds2/121_3_1	slugs_centralized	shields/momentum_shield	True	-10	False	ParticleMomentum	False	False	10	-30	Individual_Deep_Q	1.0	simple_mlp	True	0.05	2500000	11	True	IndivQLearningParticleDNNOnlyOneHotMoreSeeds2/121_3_1_slugs_centralized	slugs_centralized	shields/momentum_shield	0.05
IndivQLearningParticleDNNOnlyOneHotMoreSeeds2/121_3_1	slugs_centralized	shields/momentum_shield	True	-10	False	ParticleMomentum	False	False	10	-30	Individual_Deep_Q	1.0	simple_mlp	True	0.05	2500000	11	True	IndivQLearningParticleDNNOnlyOneHotMoreSeeds2/121_3_1_slugs_decentralized	slugs_decentralized	shields/momentum_shield	0.05
IndivQLearningParticleDNNOnlyOneHotMoreSeeds2/121_3_1	slugs_centralized	shields/momentum_shield	True	-10	False	ParticleMomentum	False	False	10	-30	Individual_Deep_Q	1.0	simple_mlp	True	0.05	2500000	11	True	IndivQLearningParticleDNNOnlyOneHotMoreSeeds2/121_3_1_none	none		0.05
IndivQLearningParticleDNNOnlyOneHotMoreSeeds2/122_3_2	slugs_centralized	shields/momentum_shield	True	-10	False	ParticleMomentum	False	False	10	-30	Individual_Deep_Q	1.0	simple_mlp	True	0.05	2500000	12	True	IndivQLearningParticleDNNOnlyOneHotMoreSeeds2/122_3_2_slugs_centralized	slugs_centralized	shields/momentum_shield	0.05
IndivQLearningParticleDNNOnlyOneHotMoreSeeds2/122_3_2	slugs_centralized	shields/momentum_shield	True	-10	False	ParticleMomentum	False	False	10	-30	Individual_Deep_Q	1.0	simple_mlp	True	0.05	2500000	12	True	IndivQLearningParticleDNNOnlyOneHotMoreSeeds2/122_3_2_slugs_decentralized	slugs_decentralized	shields/momentum_shield	0.05
IndivQLearningParticleDNNOnlyOneHotMoreSeeds2/122_3_2	slugs_centralized	shields/momentum_shield	True	-10	False	ParticleMomentum	False	False	10	-30	Individual_Deep_Q	1.0	simple_mlp	True	0.05	2500000	12	True	IndivQLearningParticleDNNOnlyOneHotMoreSeeds2/122_3_2_none	none		0.05
IndivQLearningParticleDNNOnlyOneHotMoreSeeds2/123_3_3	slugs_centralized	shields/momentum_shield	True	-10	False	ParticleMomentum	False	False	10	-30	Individual_Deep_Q	1.0	simple_mlp	True	0.05	2500000	13	True	IndivQLearningParticleDNNOnlyOneHotMoreSeeds2/123_3_3_slugs_centralized	slugs_centralized	shields/momentum_shield	0.05
IndivQLearningParticleDNNOnlyOneHotMoreSeeds2/123_3_3	slugs_centralized	shields/momentum_shield	True	-10	False	ParticleMomentum	False	False	10	-30	Individual_Deep_Q	1.0	simple_mlp	True	0.05	2500000	13	True	IndivQLearningParticleDNNOnlyOneHotMoreSeeds2/123_3_3_slugs_decentralized	slugs_decentralized	shields/momentum_shield	0.05
IndivQLearningParticleDNNOnlyOneHotMoreSeeds2/123_3_3	slugs_centralized	shields/momentum_shield	True	-10	False	ParticleMomentum	False	False	10	-30	Individual_Deep_Q	1.0	simple_mlp	True	0.05	2500000	13	True	IndivQLearningParticleDNNOnlyOneHotMoreSeeds2/123_3_3_none	none		0.05
IndivQLearningParticleDNNOnlyOneHotMoreSeeds2/124_3_4	slugs_centralized	shields/momentum_shield	True	-10	False	ParticleMomentum	False	False	10	-30	Individual_Deep_Q	1.0	simple_mlp	True	0.05	2500000	14	True	IndivQLearningParticleDNNOnlyOneHotMoreSeeds2/124_3_4_slugs_centralized	slugs_centralized	shields/momentum_shield	0.05
IndivQLearningParticleDNNOnlyOneHotMoreSeeds2/124_3_4	slugs_centralized	shields/momentum_shield	True	-10	False	ParticleMomentum	False	False	10	-30	Individual_Deep_Q	1.0	simple_mlp	True	0.05	2500000	14	True	IndivQLearningParticleDNNOnlyOneHotMoreSeeds2/124_3_4_slugs_decentralized	slugs_decentralized	shields/momentum_shield	0.05
IndivQLearningParticleDNNOnlyOneHotMoreSeeds2/124_3_4	slugs_centralized	shields/momentum_shield	True	-10	False	ParticleMomentum	False	False	10	-30	Individual_Deep_Q	1.0	simple_mlp	True	0.05	2500000	14	True	IndivQLearningParticleDNNOnlyOneHotMoreSeeds2/124_3_4_none	none		0.05
IndivQLearningParticleDNNOnlyOneHotMoreSeeds2/125_3_5	slugs_centralized	shields/momentum_shield	True	-10	False	ParticleMomentum	False	False	10	-30	Individual_Deep_Q	1.0	simple_mlp	True	0.05	2500000	15	True	IndivQLearningParticleDNNOnlyOneHotMoreSeeds2/125_3_5_slugs_centralized	slugs_centralized	shields/momentum_shield	0.05
IndivQLearningParticleDNNOnlyOneHotMoreSeeds2/125_3_5	slugs_centralized	shields/momentum_shield	True	-10	False	ParticleMomentum	False	False	10	-30	Individual_Deep_Q	1.0	simple_mlp	True	0.05	2500000	15	True	IndivQLearningParticleDNNOnlyOneHotMoreSeeds2/125_3_5_slugs_decentralized	slugs_decentralized	shields/momentum_shield	0.05
IndivQLearningParticleDNNOnlyOneHotMoreSeeds2/125_3_5	slugs_centralized	shields/momentum_shield	True	-10	False	ParticleMomentum	False	False	10	-30	Individual_Deep_Q	1.0	simple_mlp	True	0.05	2500000	15	True	IndivQLearningParticleDNNOnlyOneHotMoreSeeds2/125_3_5_none	none		0.05
IndivQLearningParticleDNNOnlyOneHotMoreSeeds2/126_3_6	slugs_centralized	shields/momentum_shield	True	-10	False	ParticleMomentum	False	False	10	-30	Individual_Deep_Q	1.0	simple_mlp	True	0.05	2500000	16	True	IndivQLearningParticleDNNOnlyOneHotMoreSeeds2/126_3_6_slugs_centralized	slugs_centralized	shields/momentum_shield	0.05
IndivQLearningParticleDNNOnlyOneHotMoreSeeds2/126_3_6	slugs_centralized	shields/momentum_shield	True	-10	False	ParticleMomentum	False	False	10	-30	Individual_Deep_Q	1.0	simple_mlp	True	0.05	2500000	16	True	IndivQLearningParticleDNNOnlyOneHotMoreSeeds2/126_3_6_slugs_decentralized	slugs_decentralized	shields/momentum_shield	0.05
IndivQLearningParticleDNNOnlyOneHotMoreSeeds2/126_3_6	slugs_centralized	shields/momentum_shield	True	-10	False	ParticleMomentum	False	False	10	-30	Individual_Deep_Q	1.0	simple_mlp	True	0.05	2500000	16	True	IndivQLearningParticleDNNOnlyOneHotMoreSeeds2/126_3_6_none	none		0.05
IndivQLearningParticleDNNOnlyOneHotMoreSeeds2/127_3_7	slugs_centralized	shields/momentum_shield	True	-10	False	ParticleMomentum	False	False	10	-30	Individual_Deep_Q	1.0	simple_mlp	True	0.05	2500000	17	True	IndivQLearningParticleDNNOnlyOneHotMoreSeeds2/127_3_7_slugs_centralized	slugs_centralized	shields/momentum_shield	0.05
IndivQLearningParticleDNNOnlyOneHotMoreSeeds2/127_3_7	slugs_centralized	shields/momentum_shield	True	-10	False	ParticleMomentum	False	False	10	-30	Individual_Deep_Q	1.0	simple_mlp	True	0.05	2500000	17	True	IndivQLearningParticleDNNOnlyOneHotMoreSeeds2/127_3_7_slugs_decentralized	slugs_decentralized	shields/momentum_shield	0.05
IndivQLearningParticleDNNOnlyOneHotMoreSeeds2/127_3_7	slugs_centralized	shields/momentum_shield	True	-10	False	ParticleMomentum	False	False	10	-30	Individual_Deep_Q	1.0	simple_mlp	True	0.05	2500000	17	True	IndivQLearningParticleDNNOnlyOneHotMoreSeeds2/127_3_7_none	none		0.05
IndivQLearningParticleDNNOnlyOneHotMoreSeeds2/128_3_8	slugs_centralized	shields/momentum_shield	True	-10	False	ParticleMomentum	False	False	10	-30	Individual_Deep_Q	1.0	simple_mlp	True	0.05	2500000	18	True	IndivQLearningParticleDNNOnlyOneHotMoreSeeds2/128_3_8_slugs_centralized	slugs_centralized	shields/momentum_shield	0.05
IndivQLearningParticleDNNOnlyOneHotMoreSeeds2/128_3_8	slugs_centralized	shields/momentum_shield	True	-10	False	ParticleMomentum	False	False	10	-30	Individual_Deep_Q	1.0	simple_mlp	True	0.05	2500000	18	True	IndivQLearningParticleDNNOnlyOneHotMoreSeeds2/128_3_8_slugs_decentralized	slugs_decentralized	shields/momentum_shield	0.05
IndivQLearningParticleDNNOnlyOneHotMoreSeeds2/128_3_8	slugs_centralized	shields/momentum_shield	True	-10	False	ParticleMomentum	False	False	10	-30	Individual_Deep_Q	1.0	simple_mlp	True	0.05	2500000	18	True	IndivQLearningParticleDNNOnlyOneHotMoreSeeds2/128_3_8_none	none		0.05
IndivQLearningParticleDNNOnlyOneHotMoreSeeds2/129_3_9	slugs_centralized	shields/momentum_shield	True	-10	False	ParticleMomentum	False	False	10	-30	Individual_Deep_Q	1.0	simple_mlp	True	0.05	2500000	19	True	IndivQLearningParticleDNNOnlyOneHotMoreSeeds2/129_3_9_slugs_centralized	slugs_centralized	shields/momentum_shield	0.05
IndivQLearningParticleDNNOnlyOneHotMoreSeeds2/129_3_9	slugs_centralized	shields/momentum_shield	True	-10	False	ParticleMomentum	False	False	10	-30	Individual_Deep_Q	1.0	simple_mlp	True	0.05	2500000	19	True	IndivQLearningParticleDNNOnlyOneHotMoreSeeds2/129_3_9_slugs_decentralized	slugs_decentralized	shields/momentum_shield	0.05
IndivQLearningParticleDNNOnlyOneHotMoreSeeds2/129_3_9	slugs_centralized	shields/momentum_shield	True	-10	False	ParticleMomentum	False	False	10	-30	Individual_Deep_Q	1.0	simple_mlp	True	0.05	2500000	19	True	IndivQLearningParticleDNNOnlyOneHotMoreSeeds2/129_3_9_none	none		0.05
IndivQLearningParticleDNNOnlyOneHotMoreSeeds2/130_3_10	slugs_centralized	shields/momentum_shield	True	-10	False	ParticleMomentum	False	False	10	-30	Individual_Deep_Q	1.0	simple_mlp	True	0.05	2500000	20	True	IndivQLearningParticleDNNOnlyOneHotMoreSeeds2/130_3_10_slugs_centralized	slugs_centralized	shields/momentum_shield	0.05
IndivQLearningParticleDNNOnlyOneHotMoreSeeds2/130_3_10	slugs_centralized	shields/momentum_shield	True	-10	False	ParticleMomentum	False	False	10	-30	Individual_Deep_Q	1.0	simple_mlp	True	0.05	2500000	20	True	IndivQLearningParticleDNNOnlyOneHotMoreSeeds2/130_3_10_slugs_decentralized	slugs_decentralized	shields/momentum_shield	0.05
IndivQLearningParticleDNNOnlyOneHotMoreSeeds2/130_3_10	slugs_centralized	shields/momentum_shield	True	-10	False	ParticleMomentum	False	False	10	-30	Individual_Deep_Q	1.0	simple_mlp	True	0.05	2500000	20	True	IndivQLearningParticleDNNOnlyOneHotMoreSeeds2/130_3_10_none	none		0.05
IndivQLearningParticleDNNOnlyOneHotMoreSeeds2/131_3_11	slugs_centralized	shields/momentum_shield	True	-10	False	ParticleMomentum	False	False	10	-30	Individual_Deep_Q	1.0	simple_mlp	True	0.05	2500000	21	True	IndivQLearningParticleDNNOnlyOneHotMoreSeeds2/131_3_11_slugs_centralized	slugs_centralized	shields/momentum_shield	0.05
IndivQLearningParticleDNNOnlyOneHotMoreSeeds2/131_3_11	slugs_centralized	shields/momentum_shield	True	-10	False	ParticleMomentum	False	False	10	-30	Individual_Deep_Q	1.0	simple_mlp	True	0.05	2500000	21	True	IndivQLearningParticleDNNOnlyOneHotMoreSeeds2/131_3_11_slugs_decentralized	slugs_decentralized	shields/momentum_shield	0.05
IndivQLearningParticleDNNOnlyOneHotMoreSeeds2/131_3_11	slugs_centralized	shields/momentum_shield	True	-10	False	ParticleMomentum	False	False	10	-30	Individual_Deep_Q	1.0	simple_mlp	True	0.05	2500000	21	True	IndivQLearningParticleDNNOnlyOneHotMoreSeeds2/131_3_11_none	none		0.05
IndivQLearningParticleDNNOnlyOneHotMoreSeeds2/132_3_12	slugs_centralized	shields/momentum_shield	True	-10	False	ParticleMomentum	False	False	10	-30	Individual_Deep_Q	1.0	simple_mlp	True	0.05	2500000	22	True	IndivQLearningParticleDNNOnlyOneHotMoreSeeds2/132_3_12_slugs_centralized	slugs_centralized	shields/momentum_shield	0.05
IndivQLearningParticleDNNOnlyOneHotMoreSeeds2/132_3_12	slugs_centralized	shields/momentum_shield	True	-10	False	ParticleMomentum	False	False	10	-30	Individual_Deep_Q	1.0	simple_mlp	True	0.05	2500000	22	True	IndivQLearningParticleDNNOnlyOneHotMoreSeeds2/132_3_12_slugs_decentralized	slugs_decentralized	shields/momentum_shield	0.05
IndivQLearningParticleDNNOnlyOneHotMoreSeeds2/132_3_12	slugs_centralized	shields/momentum_shield	True	-10	False	ParticleMomentum	False	False	10	-30	Individual_Deep_Q	1.0	simple_mlp	True	0.05	2500000	22	True	IndivQLearningParticleDNNOnlyOneHotMoreSeeds2/132_3_12_none	none		0.05
IndivQLearningParticleDNNOnlyOneHotMoreSeeds2/133_3_13	slugs_centralized	shields/momentum_shield	True	-10	False	ParticleMomentum	False	False	10	-30	Individual_Deep_Q	1.0	simple_mlp	True	0.05	2500000	23	True	IndivQLearningParticleDNNOnlyOneHotMoreSeeds2/133_3_13_slugs_centralized	slugs_centralized	shields/momentum_shield	0.05
IndivQLearningParticleDNNOnlyOneHotMoreSeeds2/133_3_13	slugs_centralized	shields/momentum_shield	True	-10	False	ParticleMomentum	False	False	10	-30	Individual_Deep_Q	1.0	simple_mlp	True	0.05	2500000	23	True	IndivQLearningParticleDNNOnlyOneHotMoreSeeds2/133_3_13_slugs_decentralized	slugs_decentralized	shields/momentum_shield	0.05
IndivQLearningParticleDNNOnlyOneHotMoreSeeds2/133_3_13	slugs_centralized	shields/momentum_shield	True	-10	False	ParticleMomentum	False	False	10	-30	Individual_Deep_Q	1.0	simple_mlp	True	0.05	2500000	23	True	IndivQLearningParticleDNNOnlyOneHotMoreSeeds2/133_3_13_none	none		0.05
IndivQLearningParticleDNNOnlyOneHotMoreSeeds2/134_3_14	slugs_centralized	shields/momentum_shield	True	-10	False	ParticleMomentum	False	False	10	-30	Individual_Deep_Q	1.0	simple_mlp	True	0.05	2500000	24	True	IndivQLearningParticleDNNOnlyOneHotMoreSeeds2/134_3_14_slugs_centralized	slugs_centralized	shields/momentum_shield	0.05
IndivQLearningParticleDNNOnlyOneHotMoreSeeds2/134_3_14	slugs_centralized	shields/momentum_shield	True	-10	False	ParticleMomentum	False	False	10	-30	Individual_Deep_Q	1.0	simple_mlp	True	0.05	2500000	24	True	IndivQLearningParticleDNNOnlyOneHotMoreSeeds2/134_3_14_slugs_decentralized	slugs_decentralized	shields/momentum_shield	0.05
IndivQLearningParticleDNNOnlyOneHotMoreSeeds2/134_3_14	slugs_centralized	shields/momentum_shield	True	-10	False	ParticleMomentum	False	False	10	-30	Individual_Deep_Q	1.0	simple_mlp	True	0.05	2500000	24	True	IndivQLearningParticleDNNOnlyOneHotMoreSeeds2/134_3_14_none	none		0.05
IndivQLearningParticleDNNOnlyOneHotMoreSeeds2/135_3_15	slugs_centralized	shields/momentum_shield	True	-10	False	ParticleMomentum	False	False	10	-30	Individual_Deep_Q	1.0	simple_mlp	True	0.05	2500000	25	True	IndivQLearningParticleDNNOnlyOneHotMoreSeeds2/135_3_15_slugs_centralized	slugs_centralized	shields/momentum_shield	0.05
IndivQLearningParticleDNNOnlyOneHotMoreSeeds2/135_3_15	slugs_centralized	shields/momentum_shield	True	-10	False	ParticleMomentum	False	False	10	-30	Individual_Deep_Q	1.0	simple_mlp	True	0.05	2500000	25	True	IndivQLearningParticleDNNOnlyOneHotMoreSeeds2/135_3_15_slugs_decentralized	slugs_decentralized	shields/momentum_shield	0.05
IndivQLearningParticleDNNOnlyOneHotMoreSeeds2/135_3_15	slugs_centralized	shields/momentum_shield	True	-10	False	ParticleMomentum	False	False	10	-30	Individual_Deep_Q	1.0	simple_mlp	True	0.05	2500000	25	True	IndivQLearningParticleDNNOnlyOneHotMoreSeeds2/135_3_15_none	none		0.05
IndivQLearningParticleDNNOnlyOneHotMoreSeeds2/136_3_16	slugs_centralized	shields/momentum_shield	True	-10	False	ParticleMomentum	False	False	10	-30	Individual_Deep_Q	1.0	simple_mlp	True	0.05	2500000	26	True	IndivQLearningParticleDNNOnlyOneHotMoreSeeds2/136_3_16_slugs_centralized	slugs_centralized	shields/momentum_shield	0.05
IndivQLearningParticleDNNOnlyOneHotMoreSeeds2/136_3_16	slugs_centralized	shields/momentum_shield	True	-10	False	ParticleMomentum	False	False	10	-30	Individual_Deep_Q	1.0	simple_mlp	True	0.05	2500000	26	True	IndivQLearningParticleDNNOnlyOneHotMoreSeeds2/136_3_16_slugs_decentralized	slugs_decentralized	shields/momentum_shield	0.05
IndivQLearningParticleDNNOnlyOneHotMoreSeeds2/136_3_16	slugs_centralized	shields/momentum_shield	True	-10	False	ParticleMomentum	False	False	10	-30	Individual_Deep_Q	1.0	simple_mlp	True	0.05	2500000	26	True	IndivQLearningParticleDNNOnlyOneHotMoreSeeds2/136_3_16_none	none		0.05
IndivQLearningParticleDNNOnlyOneHotMoreSeeds2/137_3_17	slugs_centralized	shields/momentum_shield	True	-10	False	ParticleMomentum	False	False	10	-30	Individual_Deep_Q	1.0	simple_mlp	True	0.05	2500000	27	True	IndivQLearningParticleDNNOnlyOneHotMoreSeeds2/137_3_17_slugs_centralized	slugs_centralized	shields/momentum_shield	0.05
IndivQLearningParticleDNNOnlyOneHotMoreSeeds2/137_3_17	slugs_centralized	shields/momentum_shield	True	-10	False	ParticleMomentum	False	False	10	-30	Individual_Deep_Q	1.0	simple_mlp	True	0.05	2500000	27	True	IndivQLearningParticleDNNOnlyOneHotMoreSeeds2/137_3_17_slugs_decentralized	slugs_decentralized	shields/momentum_shield	0.05
IndivQLearningParticleDNNOnlyOneHotMoreSeeds2/137_3_17	slugs_centralized	shields/momentum_shield	True	-10	False	ParticleMomentum	False	False	10	-30	Individual_Deep_Q	1.0	simple_mlp	True	0.05	2500000	27	True	IndivQLearningParticleDNNOnlyOneHotMoreSeeds2/137_3_17_none	none		0.05
IndivQLearningParticleDNNOnlyOneHotMoreSeeds2/138_3_18	slugs_centralized	shields/momentum_shield	True	-10	False	ParticleMomentum	False	False	10	-30	Individual_Deep_Q	1.0	simple_mlp	True	0.05	2500000	28	True	IndivQLearningParticleDNNOnlyOneHotMoreSeeds2/138_3_18_slugs_centralized	slugs_centralized	shields/momentum_shield	0.05
IndivQLearningParticleDNNOnlyOneHotMoreSeeds2/138_3_18	slugs_centralized	shields/momentum_shield	True	-10	False	ParticleMomentum	False	False	10	-30	Individual_Deep_Q	1.0	simple_mlp	True	0.05	2500000	28	True	IndivQLearningParticleDNNOnlyOneHotMoreSeeds2/138_3_18_slugs_decentralized	slugs_decentralized	shields/momentum_shield	0.05
IndivQLearningParticleDNNOnlyOneHotMoreSeeds2/138_3_18	slugs_centralized	shields/momentum_shield	True	-10	False	ParticleMomentum	False	False	10	-30	Individual_Deep_Q	1.0	simple_mlp	True	0.05	2500000	28	True	IndivQLearningParticleDNNOnlyOneHotMoreSeeds2/138_3_18_none	none		0.05
IndivQLearningParticleDNNOnlyOneHotMoreSeeds2/139_3_19	slugs_centralized	shields/momentum_shield	True	-10	False	ParticleMomentum	False	False	10	-30	Individual_Deep_Q	1.0	simple_mlp	True	0.05	2500000	29	True	IndivQLearningParticleDNNOnlyOneHotMoreSeeds2/139_3_19_slugs_centralized	slugs_centralized	shields/momentum_shield	0.05
IndivQLearningParticleDNNOnlyOneHotMoreSeeds2/139_3_19	slugs_centralized	shields/momentum_shield	True	-10	False	ParticleMomentum	False	False	10	-30	Individual_Deep_Q	1.0	simple_mlp	True	0.05	2500000	29	True	IndivQLearningParticleDNNOnlyOneHotMoreSeeds2/139_3_19_slugs_decentralized	slugs_decentralized	shields/momentum_shield	0.05
IndivQLearningParticleDNNOnlyOneHotMoreSeeds2/139_3_19	slugs_centralized	shields/momentum_shield	True	-10	False	ParticleMomentum	False	False	10	-30	Individual_Deep_Q	1.0	simple_mlp	True	0.05	2500000	29	True	IndivQLearningParticleDNNOnlyOneHotMoreSeeds2/139_3_19_none	none		0.05
IndivQLearningParticleDNNOnlyOneHotMoreSeeds2/140_3_20	slugs_centralized	shields/momentum_shield	True	-10	False	ParticleMomentum	False	False	10	-30	Individual_Deep_Q	1.0	simple_mlp	True	0.05	2500000	30	True	IndivQLearningParticleDNNOnlyOneHotMoreSeeds2/140_3_20_slugs_centralized	slugs_centralized	shields/momentum_shield	0.05
IndivQLearningParticleDNNOnlyOneHotMoreSeeds2/140_3_20	slugs_centralized	shields/momentum_shield	True	-10	False	ParticleMomentum	False	False	10	-30	Individual_Deep_Q	1.0	simple_mlp	True	0.05	2500000	30	True	IndivQLearningParticleDNNOnlyOneHotMoreSeeds2/140_3_20_slugs_decentralized	slugs_decentralized	shields/momentum_shield	0.05
IndivQLearningParticleDNNOnlyOneHotMoreSeeds2/140_3_20	slugs_centralized	shields/momentum_shield	True	-10	False	ParticleMomentum	False	False	10	-30	Individual_Deep_Q	1.0	simple_mlp	True	0.05	2500000	30	True	IndivQLearningParticleDNNOnlyOneHotMoreSeeds2/140_3_20_none	none		0.05
IndivQLearningParticleDNNOnlyOneHotMoreSeeds2/141_3_21	slugs_centralized	shields/momentum_shield	True	-10	False	ParticleMomentum	False	False	10	-30	Individual_Deep_Q	1.0	simple_mlp	True	0.05	2500000	31	True	IndivQLearningParticleDNNOnlyOneHotMoreSeeds2/141_3_21_slugs_centralized	slugs_centralized	shields/momentum_shield	0.05
IndivQLearningParticleDNNOnlyOneHotMoreSeeds2/141_3_21	slugs_centralized	shields/momentum_shield	True	-10	False	ParticleMomentum	False	False	10	-30	Individual_Deep_Q	1.0	simple_mlp	True	0.05	2500000	31	True	IndivQLearningParticleDNNOnlyOneHotMoreSeeds2/141_3_21_slugs_decentralized	slugs_decentralized	shields/momentum_shield	0.05
IndivQLearningParticleDNNOnlyOneHotMoreSeeds2/141_3_21	slugs_centralized	shields/momentum_shield	True	-10	False	ParticleMomentum	False	False	10	-30	Individual_Deep_Q	1.0	simple_mlp	True	0.05	2500000	31	True	IndivQLearningParticleDNNOnlyOneHotMoreSeeds2/141_3_21_none	none		0.05
IndivQLearningParticleDNNOnlyOneHotMoreSeeds2/142_3_22	slugs_centralized	shields/momentum_shield	True	-10	False	ParticleMomentum	False	False	10	-30	Individual_Deep_Q	1.0	simple_mlp	True	0.05	2500000	32	True	IndivQLearningParticleDNNOnlyOneHotMoreSeeds2/142_3_22_slugs_centralized	slugs_centralized	shields/momentum_shield	0.05
IndivQLearningParticleDNNOnlyOneHotMoreSeeds2/142_3_22	slugs_centralized	shields/momentum_shield	True	-10	False	ParticleMomentum	False	False	10	-30	Individual_Deep_Q	1.0	simple_mlp	True	0.05	2500000	32	True	IndivQLearningParticleDNNOnlyOneHotMoreSeeds2/142_3_22_slugs_decentralized	slugs_decentralized	shields/momentum_shield	0.05
IndivQLearningParticleDNNOnlyOneHotMoreSeeds2/142_3_22	slugs_centralized	shields/momentum_shield	True	-10	False	ParticleMomentum	False	False	10	-30	Individual_Deep_Q	1.0	simple_mlp	True	0.05	2500000	32	True	IndivQLearningParticleDNNOnlyOneHotMoreSeeds2/142_3_22_none	none		0.05
IndivQLearningParticleDNNOnlyOneHotMoreSeeds2/143_3_23	slugs_centralized	shields/momentum_shield	True	-10	False	ParticleMomentum	False	False	10	-30	Individual_Deep_Q	1.0	simple_mlp	True	0.05	2500000	33	True	IndivQLearningParticleDNNOnlyOneHotMoreSeeds2/143_3_23_slugs_centralized	slugs_centralized	shields/momentum_shield	0.05
IndivQLearningParticleDNNOnlyOneHotMoreSeeds2/143_3_23	slugs_centralized	shields/momentum_shield	True	-10	False	ParticleMomentum	False	False	10	-30	Individual_Deep_Q	1.0	simple_mlp	True	0.05	2500000	33	True	IndivQLearningParticleDNNOnlyOneHotMoreSeeds2/143_3_23_slugs_decentralized	slugs_decentralized	shields/momentum_shield	0.05
IndivQLearningParticleDNNOnlyOneHotMoreSeeds2/143_3_23	slugs_centralized	shields/momentum_shield	True	-10	False	ParticleMomentum	False	False	10	-30	Individual_Deep_Q	1.0	simple_mlp	True	0.05	2500000	33	True	IndivQLearningParticleDNNOnlyOneHotMoreSeeds2/143_3_23_none	none		0.05
IndivQLearningParticleDNNOnlyOneHotMoreSeeds2/144_3_24	slugs_centralized	shields/momentum_shield	True	-10	False	ParticleMomentum	False	False	10	-30	Individual_Deep_Q	1.0	simple_mlp	True	0.05	2500000	34	True	IndivQLearningParticleDNNOnlyOneHotMoreSeeds2/144_3_24_slugs_centralized	slugs_centralized	shields/momentum_shield	0.05
IndivQLearningParticleDNNOnlyOneHotMoreSeeds2/144_3_24	slugs_centralized	shields/momentum_shield	True	-10	False	ParticleMomentum	False	False	10	-30	Individual_Deep_Q	1.0	simple_mlp	True	0.05	2500000	34	True	IndivQLearningParticleDNNOnlyOneHotMoreSeeds2/144_3_24_slugs_decentralized	slugs_decentralized	shields/momentum_shield	0.05
IndivQLearningParticleDNNOnlyOneHotMoreSeeds2/144_3_24	slugs_centralized	shields/momentum_shield	True	-10	False	ParticleMomentum	False	False	10	-30	Individual_Deep_Q	1.0	simple_mlp	True	0.05	2500000	34	True	IndivQLearningParticleDNNOnlyOneHotMoreSeeds2/144_3_24_none	none		0.05
IndivQLearningParticleDNNOnlyOneHotMoreSeeds2/145_3_25	slugs_centralized	shields/momentum_shield	True	-10	False	ParticleMomentum	False	False	10	-30	Individual_Deep_Q	1.0	simple_mlp	True	0.05	2500000	35	True	IndivQLearningParticleDNNOnlyOneHotMoreSeeds2/145_3_25_slugs_centralized	slugs_centralized	shields/momentum_shield	0.05
IndivQLearningParticleDNNOnlyOneHotMoreSeeds2/145_3_25	slugs_centralized	shields/momentum_shield	True	-10	False	ParticleMomentum	False	False	10	-30	Individual_Deep_Q	1.0	simple_mlp	True	0.05	2500000	35	True	IndivQLearningParticleDNNOnlyOneHotMoreSeeds2/145_3_25_slugs_decentralized	slugs_decentralized	shields/momentum_shield	0.05
IndivQLearningParticleDNNOnlyOneHotMoreSeeds2/145_3_25	slugs_centralized	shields/momentum_shield	True	-10	False	ParticleMomentum	False	False	10	-30	Individual_Deep_Q	1.0	simple_mlp	True	0.05	2500000	35	True	IndivQLearningParticleDNNOnlyOneHotMoreSeeds2/145_3_25_none	none		0.05
IndivQLearningParticleDNNOnlyOneHotMoreSeeds2/146_3_26	slugs_centralized	shields/momentum_shield	True	-10	False	ParticleMomentum	False	False	10	-30	Individual_Deep_Q	1.0	simple_mlp	True	0.05	2500000	36	True	IndivQLearningParticleDNNOnlyOneHotMoreSeeds2/146_3_26_slugs_centralized	slugs_centralized	shields/momentum_shield	0.05
IndivQLearningParticleDNNOnlyOneHotMoreSeeds2/146_3_26	slugs_centralized	shields/momentum_shield	True	-10	False	ParticleMomentum	False	False	10	-30	Individual_Deep_Q	1.0	simple_mlp	True	0.05	2500000	36	True	IndivQLearningParticleDNNOnlyOneHotMoreSeeds2/146_3_26_slugs_decentralized	slugs_decentralized	shields/momentum_shield	0.05
IndivQLearningParticleDNNOnlyOneHotMoreSeeds2/146_3_26	slugs_centralized	shields/momentum_shield	True	-10	False	ParticleMomentum	False	False	10	-30	Individual_Deep_Q	1.0	simple_mlp	True	0.05	2500000	36	True	IndivQLearningParticleDNNOnlyOneHotMoreSeeds2/146_3_26_none	none		0.05
IndivQLearningParticleDNNOnlyOneHotMoreSeeds2/147_3_27	slugs_centralized	shields/momentum_shield	True	-10	False	ParticleMomentum	False	False	10	-30	Individual_Deep_Q	1.0	simple_mlp	True	0.05	2500000	37	True	IndivQLearningParticleDNNOnlyOneHotMoreSeeds2/147_3_27_slugs_centralized	slugs_centralized	shields/momentum_shield	0.05
IndivQLearningParticleDNNOnlyOneHotMoreSeeds2/147_3_27	slugs_centralized	shields/momentum_shield	True	-10	False	ParticleMomentum	False	False	10	-30	Individual_Deep_Q	1.0	simple_mlp	True	0.05	2500000	37	True	IndivQLearningParticleDNNOnlyOneHotMoreSeeds2/147_3_27_slugs_decentralized	slugs_decentralized	shields/momentum_shield	0.05
IndivQLearningParticleDNNOnlyOneHotMoreSeeds2/147_3_27	slugs_centralized	shields/momentum_shield	True	-10	False	ParticleMomentum	False	False	10	-30	Individual_Deep_Q	1.0	simple_mlp	True	0.05	2500000	37	True	IndivQLearningParticleDNNOnlyOneHotMoreSeeds2/147_3_27_none	none		0.05
IndivQLearningParticleDNNOnlyOneHotMoreSeeds2/148_3_28	slugs_centralized	shields/momentum_shield	True	-10	False	ParticleMomentum	False	False	10	-30	Individual_Deep_Q	1.0	simple_mlp	True	0.05	2500000	38	True	IndivQLearningParticleDNNOnlyOneHotMoreSeeds2/148_3_28_slugs_centralized	slugs_centralized	shields/momentum_shield	0.05
IndivQLearningParticleDNNOnlyOneHotMoreSeeds2/148_3_28	slugs_centralized	shields/momentum_shield	True	-10	False	ParticleMomentum	False	False	10	-30	Individual_Deep_Q	1.0	simple_mlp	True	0.05	2500000	38	True	IndivQLearningParticleDNNOnlyOneHotMoreSeeds2/148_3_28_slugs_decentralized	slugs_decentralized	shields/momentum_shield	0.05
IndivQLearningParticleDNNOnlyOneHotMoreSeeds2/148_3_28	slugs_centralized	shields/momentum_shield	True	-10	False	ParticleMomentum	False	False	10	-30	Individual_Deep_Q	1.0	simple_mlp	True	0.05	2500000	38	True	IndivQLearningParticleDNNOnlyOneHotMoreSeeds2/148_3_28_none	none		0.05
IndivQLearningParticleDNNOnlyOneHotMoreSeeds2/149_3_29	slugs_centralized	shields/momentum_shield	True	-10	False	ParticleMomentum	False	False	10	-30	Individual_Deep_Q	1.0	simple_mlp	True	0.05	2500000	39	True	IndivQLearningParticleDNNOnlyOneHotMoreSeeds2/149_3_29_slugs_centralized	slugs_centralized	shields/momentum_shield	0.05
IndivQLearningParticleDNNOnlyOneHotMoreSeeds2/149_3_29	slugs_centralized	shields/momentum_shield	True	-10	False	ParticleMomentum	False	False	10	-30	Individual_Deep_Q	1.0	simple_mlp	True	0.05	2500000	39	True	IndivQLearningParticleDNNOnlyOneHotMoreSeeds2/149_3_29_slugs_decentralized	slugs_decentralized	shields/momentum_shield	0.05
IndivQLearningParticleDNNOnlyOneHotMoreSeeds2/149_3_29	slugs_centralized	shields/momentum_shield	True	-10	False	ParticleMomentum	False	False	10	-30	Individual_Deep_Q	1.0	simple_mlp	True	0.05	2500000	39	True	IndivQLearningParticleDNNOnlyOneHotMoreSeeds2/149_3_29_none	none		0.05
IndivQLearningParticleDNNOnlyOneHotMoreSeeds2/150_3_30	slugs_centralized	shields/momentum_shield	True	-10	False	ParticleMomentum	False	False	10	-30	Individual_Deep_Q	1.0	simple_mlp	True	0.05	2500000	40	True	IndivQLearningParticleDNNOnlyOneHotMoreSeeds2/150_3_30_slugs_centralized	slugs_centralized	shields/momentum_shield	0.05
IndivQLearningParticleDNNOnlyOneHotMoreSeeds2/150_3_30	slugs_centralized	shields/momentum_shield	True	-10	False	ParticleMomentum	False	False	10	-30	Individual_Deep_Q	1.0	simple_mlp	True	0.05	2500000	40	True	IndivQLearningParticleDNNOnlyOneHotMoreSeeds2/150_3_30_slugs_decentralized	slugs_decentralized	shields/momentum_shield	0.05
IndivQLearningParticleDNNOnlyOneHotMoreSeeds2/150_3_30	slugs_centralized	shields/momentum_shield	True	-10	False	ParticleMomentum	False	False	10	-30	Individual_Deep_Q	1.0	simple_mlp	True	0.05	2500000	40	True	IndivQLearningParticleDNNOnlyOneHotMoreSeeds2/150_3_30_none	none		0.05
IndivQLearningParticleDNNOnlyOneHotMoreSeeds2/151_3_31	slugs_centralized	shields/momentum_shield	True	-10	False	ParticleMomentum	False	False	10	-30	Individual_Deep_Q	1.0	simple_mlp	True	0.05	2500000	41	True	IndivQLearningParticleDNNOnlyOneHotMoreSeeds2/151_3_31_slugs_centralized	slugs_centralized	shields/momentum_shield	0.05
IndivQLearningParticleDNNOnlyOneHotMoreSeeds2/151_3_31	slugs_centralized	shields/momentum_shield	True	-10	False	ParticleMomentum	False	False	10	-30	Individual_Deep_Q	1.0	simple_mlp	True	0.05	2500000	41	True	IndivQLearningParticleDNNOnlyOneHotMoreSeeds2/151_3_31_slugs_decentralized	slugs_decentralized	shields/momentum_shield	0.05
IndivQLearningParticleDNNOnlyOneHotMoreSeeds2/151_3_31	slugs_centralized	shields/momentum_shield	True	-10	False	ParticleMomentum	False	False	10	-30	Individual_Deep_Q	1.0	simple_mlp	True	0.05	2500000	41	True	IndivQLearningParticleDNNOnlyOneHotMoreSeeds2/151_3_31_none	none		0.05
IndivQLearningParticleDNNOnlyOneHotMoreSeeds2/152_3_32	slugs_centralized	shields/momentum_shield	True	-10	False	ParticleMomentum	False	False	10	-30	Individual_Deep_Q	1.0	simple_mlp	True	0.05	2500000	42	True	IndivQLearningParticleDNNOnlyOneHotMoreSeeds2/152_3_32_slugs_centralized	slugs_centralized	shields/momentum_shield	0.05
IndivQLearningParticleDNNOnlyOneHotMoreSeeds2/152_3_32	slugs_centralized	shields/momentum_shield	True	-10	False	ParticleMomentum	False	False	10	-30	Individual_Deep_Q	1.0	simple_mlp	True	0.05	2500000	42	True	IndivQLearningParticleDNNOnlyOneHotMoreSeeds2/152_3_32_slugs_decentralized	slugs_decentralized	shields/momentum_shield	0.05
IndivQLearningParticleDNNOnlyOneHotMoreSeeds2/152_3_32	slugs_centralized	shields/momentum_shield	True	-10	False	ParticleMomentum	False	False	10	-30	Individual_Deep_Q	1.0	simple_mlp	True	0.05	2500000	42	True	IndivQLearningParticleDNNOnlyOneHotMoreSeeds2/152_3_32_none	none		0.05
IndivQLearningParticleDNNOnlyOneHotMoreSeeds2/153_3_33	slugs_centralized	shields/momentum_shield	True	-10	False	ParticleMomentum	False	False	10	-30	Individual_Deep_Q	1.0	simple_mlp	True	0.05	2500000	43	True	IndivQLearningParticleDNNOnlyOneHotMoreSeeds2/153_3_33_slugs_centralized	slugs_centralized	shields/momentum_shield	0.05
IndivQLearningParticleDNNOnlyOneHotMoreSeeds2/153_3_33	slugs_centralized	shields/momentum_shield	True	-10	False	ParticleMomentum	False	False	10	-30	Individual_Deep_Q	1.0	simple_mlp	True	0.05	2500000	43	True	IndivQLearningParticleDNNOnlyOneHotMoreSeeds2/153_3_33_slugs_decentralized	slugs_decentralized	shields/momentum_shield	0.05
IndivQLearningParticleDNNOnlyOneHotMoreSeeds2/153_3_33	slugs_centralized	shields/momentum_shield	True	-10	False	ParticleMomentum	False	False	10	-30	Individual_Deep_Q	1.0	simple_mlp	True	0.05	2500000	43	True	IndivQLearningParticleDNNOnlyOneHotMoreSeeds2/153_3_33_none	none		0.05
IndivQLearningParticleDNNOnlyOneHotMoreSeeds2/154_3_34	slugs_centralized	shields/momentum_shield	True	-10	False	ParticleMomentum	False	False	10	-30	Individual_Deep_Q	1.0	simple_mlp	True	0.05	2500000	44	True	IndivQLearningParticleDNNOnlyOneHotMoreSeeds2/154_3_34_slugs_centralized	slugs_centralized	shields/momentum_shield	0.05
IndivQLearningParticleDNNOnlyOneHotMoreSeeds2/154_3_34	slugs_centralized	shields/momentum_shield	True	-10	False	ParticleMomentum	False	False	10	-30	Individual_Deep_Q	1.0	simple_mlp	True	0.05	2500000	44	True	IndivQLearningParticleDNNOnlyOneHotMoreSeeds2/154_3_34_slugs_decentralized	slugs_decentralized	shields/momentum_shield	0.05
IndivQLearningParticleDNNOnlyOneHotMoreSeeds2/154_3_34	slugs_centralized	shields/momentum_shield	True	-10	False	ParticleMomentum	False	False	10	-30	Individual_Deep_Q	1.0	simple_mlp	True	0.05	2500000	44	True	IndivQLearningParticleDNNOnlyOneHotMoreSeeds2/154_3_34_none	none		0.05
IndivQLearningParticleDNNOnlyOneHotMoreSeeds2/155_3_35	slugs_centralized	shields/momentum_shield	True	-10	False	ParticleMomentum	False	False	10	-30	Individual_Deep_Q	1.0	simple_mlp	True	0.05	2500000	45	True	IndivQLearningParticleDNNOnlyOneHotMoreSeeds2/155_3_35_slugs_centralized	slugs_centralized	shields/momentum_shield	0.05
IndivQLearningParticleDNNOnlyOneHotMoreSeeds2/155_3_35	slugs_centralized	shields/momentum_shield	True	-10	False	ParticleMomentum	False	False	10	-30	Individual_Deep_Q	1.0	simple_mlp	True	0.05	2500000	45	True	IndivQLearningParticleDNNOnlyOneHotMoreSeeds2/155_3_35_slugs_decentralized	slugs_decentralized	shields/momentum_shield	0.05
IndivQLearningParticleDNNOnlyOneHotMoreSeeds2/155_3_35	slugs_centralized	shields/momentum_shield	True	-10	False	ParticleMomentum	False	False	10	-30	Individual_Deep_Q	1.0	simple_mlp	True	0.05	2500000	45	True	IndivQLearningParticleDNNOnlyOneHotMoreSeeds2/155_3_35_none	none		0.05
IndivQLearningParticleDNNOnlyOneHotMoreSeeds2/156_3_36	slugs_centralized	shields/momentum_shield	True	-10	False	ParticleMomentum	False	False	10	-30	Individual_Deep_Q	1.0	simple_mlp	True	0.05	2500000	46	True	IndivQLearningParticleDNNOnlyOneHotMoreSeeds2/156_3_36_slugs_centralized	slugs_centralized	shields/momentum_shield	0.05
IndivQLearningParticleDNNOnlyOneHotMoreSeeds2/156_3_36	slugs_centralized	shields/momentum_shield	True	-10	False	ParticleMomentum	False	False	10	-30	Individual_Deep_Q	1.0	simple_mlp	True	0.05	2500000	46	True	IndivQLearningParticleDNNOnlyOneHotMoreSeeds2/156_3_36_slugs_decentralized	slugs_decentralized	shields/momentum_shield	0.05
IndivQLearningParticleDNNOnlyOneHotMoreSeeds2/156_3_36	slugs_centralized	shields/momentum_shield	True	-10	False	ParticleMomentum	False	False	10	-30	Individual_Deep_Q	1.0	simple_mlp	True	0.05	2500000	46	True	IndivQLearningParticleDNNOnlyOneHotMoreSeeds2/156_3_36_none	none		0.05
IndivQLearningParticleDNNOnlyOneHotMoreSeeds2/157_3_37	slugs_centralized	shields/momentum_shield	True	-10	False	ParticleMomentum	False	False	10	-30	Individual_Deep_Q	1.0	simple_mlp	True	0.05	2500000	47	True	IndivQLearningParticleDNNOnlyOneHotMoreSeeds2/157_3_37_slugs_centralized	slugs_centralized	shields/momentum_shield	0.05
IndivQLearningParticleDNNOnlyOneHotMoreSeeds2/157_3_37	slugs_centralized	shields/momentum_shield	True	-10	False	ParticleMomentum	False	False	10	-30	Individual_Deep_Q	1.0	simple_mlp	True	0.05	2500000	47	True	IndivQLearningParticleDNNOnlyOneHotMoreSeeds2/157_3_37_slugs_decentralized	slugs_decentralized	shields/momentum_shield	0.05
IndivQLearningParticleDNNOnlyOneHotMoreSeeds2/157_3_37	slugs_centralized	shields/momentum_shield	True	-10	False	ParticleMomentum	False	False	10	-30	Individual_Deep_Q	1.0	simple_mlp	True	0.05	2500000	47	True	IndivQLearningParticleDNNOnlyOneHotMoreSeeds2/157_3_37_none	none		0.05
IndivQLearningParticleDNNOnlyOneHotMoreSeeds2/158_3_38	slugs_centralized	shields/momentum_shield	True	-10	False	ParticleMomentum	False	False	10	-30	Individual_Deep_Q	1.0	simple_mlp	True	0.05	2500000	48	True	IndivQLearningParticleDNNOnlyOneHotMoreSeeds2/158_3_38_slugs_centralized	slugs_centralized	shields/momentum_shield	0.05
IndivQLearningParticleDNNOnlyOneHotMoreSeeds2/158_3_38	slugs_centralized	shields/momentum_shield	True	-10	False	ParticleMomentum	False	False	10	-30	Individual_Deep_Q	1.0	simple_mlp	True	0.05	2500000	48	True	IndivQLearningParticleDNNOnlyOneHotMoreSeeds2/158_3_38_slugs_decentralized	slugs_decentralized	shields/momentum_shield	0.05
IndivQLearningParticleDNNOnlyOneHotMoreSeeds2/158_3_38	slugs_centralized	shields/momentum_shield	True	-10	False	ParticleMomentum	False	False	10	-30	Individual_Deep_Q	1.0	simple_mlp	True	0.05	2500000	48	True	IndivQLearningParticleDNNOnlyOneHotMoreSeeds2/158_3_38_none	none		0.05
IndivQLearningParticleDNNOnlyOneHotMoreSeeds2/159_3_39	slugs_centralized	shields/momentum_shield	True	-10	False	ParticleMomentum	False	False	10	-30	Individual_Deep_Q	1.0	simple_mlp	True	0.05	2500000	49	True	IndivQLearningParticleDNNOnlyOneHotMoreSeeds2/159_3_39_slugs_centralized	slugs_centralized	shields/momentum_shield	0.05
IndivQLearningParticleDNNOnlyOneHotMoreSeeds2/159_3_39	slugs_centralized	shields/momentum_shield	True	-10	False	ParticleMomentum	False	False	10	-30	Individual_Deep_Q	1.0	simple_mlp	True	0.05	2500000	49	True	IndivQLearningParticleDNNOnlyOneHotMoreSeeds2/159_3_39_slugs_decentralized	slugs_decentralized	shields/momentum_shield	0.05
IndivQLearningParticleDNNOnlyOneHotMoreSeeds2/159_3_39	slugs_centralized	shields/momentum_shield	True	-10	False	ParticleMomentum	False	False	10	-30	Individual_Deep_Q	1.0	simple_mlp	True	0.05	2500000	49	True	IndivQLearningParticleDNNOnlyOneHotMoreSeeds2/159_3_39_none	none		0.05
IndivQLearningParticleDNNOnlyOneHotMoreSeeds2/160_4_0	slugs_decentralized	shields/momentum_shield	True	-10	False	ParticleMomentum	False	False	10	-30	Individual_Deep_Q	1.0	simple_mlp	True	0.05	2500000	10	True	IndivQLearningParticleDNNOnlyOneHotMoreSeeds2/160_4_0_slugs_centralized	slugs_centralized	shields/momentum_shield	0.05
IndivQLearningParticleDNNOnlyOneHotMoreSeeds2/160_4_0	slugs_decentralized	shields/momentum_shield	True	-10	False	ParticleMomentum	False	False	10	-30	Individual_Deep_Q	1.0	simple_mlp	True	0.05	2500000	10	True	IndivQLearningParticleDNNOnlyOneHotMoreSeeds2/160_4_0_slugs_decentralized	slugs_decentralized	shields/momentum_shield	0.05
IndivQLearningParticleDNNOnlyOneHotMoreSeeds2/160_4_0	slugs_decentralized	shields/momentum_shield	True	-10	False	ParticleMomentum	False	False	10	-30	Individual_Deep_Q	1.0	simple_mlp	True	0.05	2500000	10	True	IndivQLearningParticleDNNOnlyOneHotMoreSeeds2/160_4_0_none	none		0.05
IndivQLearningParticleDNNOnlyOneHotMoreSeeds2/161_4_1	slugs_decentralized	shields/momentum_shield	True	-10	False	ParticleMomentum	False	False	10	-30	Individual_Deep_Q	1.0	simple_mlp	True	0.05	2500000	11	True	IndivQLearningParticleDNNOnlyOneHotMoreSeeds2/161_4_1_slugs_centralized	slugs_centralized	shields/momentum_shield	0.05
IndivQLearningParticleDNNOnlyOneHotMoreSeeds2/161_4_1	slugs_decentralized	shields/momentum_shield	True	-10	False	ParticleMomentum	False	False	10	-30	Individual_Deep_Q	1.0	simple_mlp	True	0.05	2500000	11	True	IndivQLearningParticleDNNOnlyOneHotMoreSeeds2/161_4_1_slugs_decentralized	slugs_decentralized	shields/momentum_shield	0.05
IndivQLearningParticleDNNOnlyOneHotMoreSeeds2/161_4_1	slugs_decentralized	shields/momentum_shield	True	-10	False	ParticleMomentum	False	False	10	-30	Individual_Deep_Q	1.0	simple_mlp	True	0.05	2500000	11	True	IndivQLearningParticleDNNOnlyOneHotMoreSeeds2/161_4_1_none	none		0.05
IndivQLearningParticleDNNOnlyOneHotMoreSeeds2/162_4_2	slugs_decentralized	shields/momentum_shield	True	-10	False	ParticleMomentum	False	False	10	-30	Individual_Deep_Q	1.0	simple_mlp	True	0.05	2500000	12	True	IndivQLearningParticleDNNOnlyOneHotMoreSeeds2/162_4_2_slugs_centralized	slugs_centralized	shields/momentum_shield	0.05
IndivQLearningParticleDNNOnlyOneHotMoreSeeds2/162_4_2	slugs_decentralized	shields/momentum_shield	True	-10	False	ParticleMomentum	False	False	10	-30	Individual_Deep_Q	1.0	simple_mlp	True	0.05	2500000	12	True	IndivQLearningParticleDNNOnlyOneHotMoreSeeds2/162_4_2_slugs_decentralized	slugs_decentralized	shields/momentum_shield	0.05
IndivQLearningParticleDNNOnlyOneHotMoreSeeds2/162_4_2	slugs_decentralized	shields/momentum_shield	True	-10	False	ParticleMomentum	False	False	10	-30	Individual_Deep_Q	1.0	simple_mlp	True	0.05	2500000	12	True	IndivQLearningParticleDNNOnlyOneHotMoreSeeds2/162_4_2_none	none		0.05
IndivQLearningParticleDNNOnlyOneHotMoreSeeds2/163_4_3	slugs_decentralized	shields/momentum_shield	True	-10	False	ParticleMomentum	False	False	10	-30	Individual_Deep_Q	1.0	simple_mlp	True	0.05	2500000	13	True	IndivQLearningParticleDNNOnlyOneHotMoreSeeds2/163_4_3_slugs_centralized	slugs_centralized	shields/momentum_shield	0.05
IndivQLearningParticleDNNOnlyOneHotMoreSeeds2/163_4_3	slugs_decentralized	shields/momentum_shield	True	-10	False	ParticleMomentum	False	False	10	-30	Individual_Deep_Q	1.0	simple_mlp	True	0.05	2500000	13	True	IndivQLearningParticleDNNOnlyOneHotMoreSeeds2/163_4_3_slugs_decentralized	slugs_decentralized	shields/momentum_shield	0.05
IndivQLearningParticleDNNOnlyOneHotMoreSeeds2/163_4_3	slugs_decentralized	shields/momentum_shield	True	-10	False	ParticleMomentum	False	False	10	-30	Individual_Deep_Q	1.0	simple_mlp	True	0.05	2500000	13	True	IndivQLearningParticleDNNOnlyOneHotMoreSeeds2/163_4_3_none	none		0.05
IndivQLearningParticleDNNOnlyOneHotMoreSeeds2/164_4_4	slugs_decentralized	shields/momentum_shield	True	-10	False	ParticleMomentum	False	False	10	-30	Individual_Deep_Q	1.0	simple_mlp	True	0.05	2500000	14	True	IndivQLearningParticleDNNOnlyOneHotMoreSeeds2/164_4_4_slugs_centralized	slugs_centralized	shields/momentum_shield	0.05
IndivQLearningParticleDNNOnlyOneHotMoreSeeds2/164_4_4	slugs_decentralized	shields/momentum_shield	True	-10	False	ParticleMomentum	False	False	10	-30	Individual_Deep_Q	1.0	simple_mlp	True	0.05	2500000	14	True	IndivQLearningParticleDNNOnlyOneHotMoreSeeds2/164_4_4_slugs_decentralized	slugs_decentralized	shields/momentum_shield	0.05
IndivQLearningParticleDNNOnlyOneHotMoreSeeds2/164_4_4	slugs_decentralized	shields/momentum_shield	True	-10	False	ParticleMomentum	False	False	10	-30	Individual_Deep_Q	1.0	simple_mlp	True	0.05	2500000	14	True	IndivQLearningParticleDNNOnlyOneHotMoreSeeds2/164_4_4_none	none		0.05
IndivQLearningParticleDNNOnlyOneHotMoreSeeds2/165_4_5	slugs_decentralized	shields/momentum_shield	True	-10	False	ParticleMomentum	False	False	10	-30	Individual_Deep_Q	1.0	simple_mlp	True	0.05	2500000	15	True	IndivQLearningParticleDNNOnlyOneHotMoreSeeds2/165_4_5_slugs_centralized	slugs_centralized	shields/momentum_shield	0.05
IndivQLearningParticleDNNOnlyOneHotMoreSeeds2/165_4_5	slugs_decentralized	shields/momentum_shield	True	-10	False	ParticleMomentum	False	False	10	-30	Individual_Deep_Q	1.0	simple_mlp	True	0.05	2500000	15	True	IndivQLearningParticleDNNOnlyOneHotMoreSeeds2/165_4_5_slugs_decentralized	slugs_decentralized	shields/momentum_shield	0.05
IndivQLearningParticleDNNOnlyOneHotMoreSeeds2/165_4_5	slugs_decentralized	shields/momentum_shield	True	-10	False	ParticleMomentum	False	False	10	-30	Individual_Deep_Q	1.0	simple_mlp	True	0.05	2500000	15	True	IndivQLearningParticleDNNOnlyOneHotMoreSeeds2/165_4_5_none	none		0.05
IndivQLearningParticleDNNOnlyOneHotMoreSeeds2/166_4_6	slugs_decentralized	shields/momentum_shield	True	-10	False	ParticleMomentum	False	False	10	-30	Individual_Deep_Q	1.0	simple_mlp	True	0.05	2500000	16	True	IndivQLearningParticleDNNOnlyOneHotMoreSeeds2/166_4_6_slugs_centralized	slugs_centralized	shields/momentum_shield	0.05
IndivQLearningParticleDNNOnlyOneHotMoreSeeds2/166_4_6	slugs_decentralized	shields/momentum_shield	True	-10	False	ParticleMomentum	False	False	10	-30	Individual_Deep_Q	1.0	simple_mlp	True	0.05	2500000	16	True	IndivQLearningParticleDNNOnlyOneHotMoreSeeds2/166_4_6_slugs_decentralized	slugs_decentralized	shields/momentum_shield	0.05
IndivQLearningParticleDNNOnlyOneHotMoreSeeds2/166_4_6	slugs_decentralized	shields/momentum_shield	True	-10	False	ParticleMomentum	False	False	10	-30	Individual_Deep_Q	1.0	simple_mlp	True	0.05	2500000	16	True	IndivQLearningParticleDNNOnlyOneHotMoreSeeds2/166_4_6_none	none		0.05
IndivQLearningParticleDNNOnlyOneHotMoreSeeds2/167_4_7	slugs_decentralized	shields/momentum_shield	True	-10	False	ParticleMomentum	False	False	10	-30	Individual_Deep_Q	1.0	simple_mlp	True	0.05	2500000	17	True	IndivQLearningParticleDNNOnlyOneHotMoreSeeds2/167_4_7_slugs_centralized	slugs_centralized	shields/momentum_shield	0.05
IndivQLearningParticleDNNOnlyOneHotMoreSeeds2/167_4_7	slugs_decentralized	shields/momentum_shield	True	-10	False	ParticleMomentum	False	False	10	-30	Individual_Deep_Q	1.0	simple_mlp	True	0.05	2500000	17	True	IndivQLearningParticleDNNOnlyOneHotMoreSeeds2/167_4_7_slugs_decentralized	slugs_decentralized	shields/momentum_shield	0.05
IndivQLearningParticleDNNOnlyOneHotMoreSeeds2/167_4_7	slugs_decentralized	shields/momentum_shield	True	-10	False	ParticleMomentum	False	False	10	-30	Individual_Deep_Q	1.0	simple_mlp	True	0.05	2500000	17	True	IndivQLearningParticleDNNOnlyOneHotMoreSeeds2/167_4_7_none	none		0.05
IndivQLearningParticleDNNOnlyOneHotMoreSeeds2/168_4_8	slugs_decentralized	shields/momentum_shield	True	-10	False	ParticleMomentum	False	False	10	-30	Individual_Deep_Q	1.0	simple_mlp	True	0.05	2500000	18	True	IndivQLearningParticleDNNOnlyOneHotMoreSeeds2/168_4_8_slugs_centralized	slugs_centralized	shields/momentum_shield	0.05
IndivQLearningParticleDNNOnlyOneHotMoreSeeds2/168_4_8	slugs_decentralized	shields/momentum_shield	True	-10	False	ParticleMomentum	False	False	10	-30	Individual_Deep_Q	1.0	simple_mlp	True	0.05	2500000	18	True	IndivQLearningParticleDNNOnlyOneHotMoreSeeds2/168_4_8_slugs_decentralized	slugs_decentralized	shields/momentum_shield	0.05
IndivQLearningParticleDNNOnlyOneHotMoreSeeds2/168_4_8	slugs_decentralized	shields/momentum_shield	True	-10	False	ParticleMomentum	False	False	10	-30	Individual_Deep_Q	1.0	simple_mlp	True	0.05	2500000	18	True	IndivQLearningParticleDNNOnlyOneHotMoreSeeds2/168_4_8_none	none		0.05
IndivQLearningParticleDNNOnlyOneHotMoreSeeds2/169_4_9	slugs_decentralized	shields/momentum_shield	True	-10	False	ParticleMomentum	False	False	10	-30	Individual_Deep_Q	1.0	simple_mlp	True	0.05	2500000	19	True	IndivQLearningParticleDNNOnlyOneHotMoreSeeds2/169_4_9_slugs_centralized	slugs_centralized	shields/momentum_shield	0.05
IndivQLearningParticleDNNOnlyOneHotMoreSeeds2/169_4_9	slugs_decentralized	shields/momentum_shield	True	-10	False	ParticleMomentum	False	False	10	-30	Individual_Deep_Q	1.0	simple_mlp	True	0.05	2500000	19	True	IndivQLearningParticleDNNOnlyOneHotMoreSeeds2/169_4_9_slugs_decentralized	slugs_decentralized	shields/momentum_shield	0.05
IndivQLearningParticleDNNOnlyOneHotMoreSeeds2/169_4_9	slugs_decentralized	shields/momentum_shield	True	-10	False	ParticleMomentum	False	False	10	-30	Individual_Deep_Q	1.0	simple_mlp	True	0.05	2500000	19	True	IndivQLearningParticleDNNOnlyOneHotMoreSeeds2/169_4_9_none	none		0.05
IndivQLearningParticleDNNOnlyOneHotMoreSeeds2/170_4_10	slugs_decentralized	shields/momentum_shield	True	-10	False	ParticleMomentum	False	False	10	-30	Individual_Deep_Q	1.0	simple_mlp	True	0.05	2500000	20	True	IndivQLearningParticleDNNOnlyOneHotMoreSeeds2/170_4_10_slugs_centralized	slugs_centralized	shields/momentum_shield	0.05
IndivQLearningParticleDNNOnlyOneHotMoreSeeds2/170_4_10	slugs_decentralized	shields/momentum_shield	True	-10	False	ParticleMomentum	False	False	10	-30	Individual_Deep_Q	1.0	simple_mlp	True	0.05	2500000	20	True	IndivQLearningParticleDNNOnlyOneHotMoreSeeds2/170_4_10_slugs_decentralized	slugs_decentralized	shields/momentum_shield	0.05
IndivQLearningParticleDNNOnlyOneHotMoreSeeds2/170_4_10	slugs_decentralized	shields/momentum_shield	True	-10	False	ParticleMomentum	False	False	10	-30	Individual_Deep_Q	1.0	simple_mlp	True	0.05	2500000	20	True	IndivQLearningParticleDNNOnlyOneHotMoreSeeds2/170_4_10_none	none		0.05
IndivQLearningParticleDNNOnlyOneHotMoreSeeds2/171_4_11	slugs_decentralized	shields/momentum_shield	True	-10	False	ParticleMomentum	False	False	10	-30	Individual_Deep_Q	1.0	simple_mlp	True	0.05	2500000	21	True	IndivQLearningParticleDNNOnlyOneHotMoreSeeds2/171_4_11_slugs_centralized	slugs_centralized	shields/momentum_shield	0.05
IndivQLearningParticleDNNOnlyOneHotMoreSeeds2/171_4_11	slugs_decentralized	shields/momentum_shield	True	-10	False	ParticleMomentum	False	False	10	-30	Individual_Deep_Q	1.0	simple_mlp	True	0.05	2500000	21	True	IndivQLearningParticleDNNOnlyOneHotMoreSeeds2/171_4_11_slugs_decentralized	slugs_decentralized	shields/momentum_shield	0.05
IndivQLearningParticleDNNOnlyOneHotMoreSeeds2/171_4_11	slugs_decentralized	shields/momentum_shield	True	-10	False	ParticleMomentum	False	False	10	-30	Individual_Deep_Q	1.0	simple_mlp	True	0.05	2500000	21	True	IndivQLearningParticleDNNOnlyOneHotMoreSeeds2/171_4_11_none	none		0.05
IndivQLearningParticleDNNOnlyOneHotMoreSeeds2/172_4_12	slugs_decentralized	shields/momentum_shield	True	-10	False	ParticleMomentum	False	False	10	-30	Individual_Deep_Q	1.0	simple_mlp	True	0.05	2500000	22	True	IndivQLearningParticleDNNOnlyOneHotMoreSeeds2/172_4_12_slugs_centralized	slugs_centralized	shields/momentum_shield	0.05
IndivQLearningParticleDNNOnlyOneHotMoreSeeds2/172_4_12	slugs_decentralized	shields/momentum_shield	True	-10	False	ParticleMomentum	False	False	10	-30	Individual_Deep_Q	1.0	simple_mlp	True	0.05	2500000	22	True	IndivQLearningParticleDNNOnlyOneHotMoreSeeds2/172_4_12_slugs_decentralized	slugs_decentralized	shields/momentum_shield	0.05
IndivQLearningParticleDNNOnlyOneHotMoreSeeds2/172_4_12	slugs_decentralized	shields/momentum_shield	True	-10	False	ParticleMomentum	False	False	10	-30	Individual_Deep_Q	1.0	simple_mlp	True	0.05	2500000	22	True	IndivQLearningParticleDNNOnlyOneHotMoreSeeds2/172_4_12_none	none		0.05
IndivQLearningParticleDNNOnlyOneHotMoreSeeds2/173_4_13	slugs_decentralized	shields/momentum_shield	True	-10	False	ParticleMomentum	False	False	10	-30	Individual_Deep_Q	1.0	simple_mlp	True	0.05	2500000	23	True	IndivQLearningParticleDNNOnlyOneHotMoreSeeds2/173_4_13_slugs_centralized	slugs_centralized	shields/momentum_shield	0.05
IndivQLearningParticleDNNOnlyOneHotMoreSeeds2/173_4_13	slugs_decentralized	shields/momentum_shield	True	-10	False	ParticleMomentum	False	False	10	-30	Individual_Deep_Q	1.0	simple_mlp	True	0.05	2500000	23	True	IndivQLearningParticleDNNOnlyOneHotMoreSeeds2/173_4_13_slugs_decentralized	slugs_decentralized	shields/momentum_shield	0.05
IndivQLearningParticleDNNOnlyOneHotMoreSeeds2/173_4_13	slugs_decentralized	shields/momentum_shield	True	-10	False	ParticleMomentum	False	False	10	-30	Individual_Deep_Q	1.0	simple_mlp	True	0.05	2500000	23	True	IndivQLearningParticleDNNOnlyOneHotMoreSeeds2/173_4_13_none	none		0.05
IndivQLearningParticleDNNOnlyOneHotMoreSeeds2/174_4_14	slugs_decentralized	shields/momentum_shield	True	-10	False	ParticleMomentum	False	False	10	-30	Individual_Deep_Q	1.0	simple_mlp	True	0.05	2500000	24	True	IndivQLearningParticleDNNOnlyOneHotMoreSeeds2/174_4_14_slugs_centralized	slugs_centralized	shields/momentum_shield	0.05
IndivQLearningParticleDNNOnlyOneHotMoreSeeds2/174_4_14	slugs_decentralized	shields/momentum_shield	True	-10	False	ParticleMomentum	False	False	10	-30	Individual_Deep_Q	1.0	simple_mlp	True	0.05	2500000	24	True	IndivQLearningParticleDNNOnlyOneHotMoreSeeds2/174_4_14_slugs_decentralized	slugs_decentralized	shields/momentum_shield	0.05
IndivQLearningParticleDNNOnlyOneHotMoreSeeds2/174_4_14	slugs_decentralized	shields/momentum_shield	True	-10	False	ParticleMomentum	False	False	10	-30	Individual_Deep_Q	1.0	simple_mlp	True	0.05	2500000	24	True	IndivQLearningParticleDNNOnlyOneHotMoreSeeds2/174_4_14_none	none		0.05
IndivQLearningParticleDNNOnlyOneHotMoreSeeds2/175_4_15	slugs_decentralized	shields/momentum_shield	True	-10	False	ParticleMomentum	False	False	10	-30	Individual_Deep_Q	1.0	simple_mlp	True	0.05	2500000	25	True	IndivQLearningParticleDNNOnlyOneHotMoreSeeds2/175_4_15_slugs_centralized	slugs_centralized	shields/momentum_shield	0.05
IndivQLearningParticleDNNOnlyOneHotMoreSeeds2/175_4_15	slugs_decentralized	shields/momentum_shield	True	-10	False	ParticleMomentum	False	False	10	-30	Individual_Deep_Q	1.0	simple_mlp	True	0.05	2500000	25	True	IndivQLearningParticleDNNOnlyOneHotMoreSeeds2/175_4_15_slugs_decentralized	slugs_decentralized	shields/momentum_shield	0.05
IndivQLearningParticleDNNOnlyOneHotMoreSeeds2/175_4_15	slugs_decentralized	shields/momentum_shield	True	-10	False	ParticleMomentum	False	False	10	-30	Individual_Deep_Q	1.0	simple_mlp	True	0.05	2500000	25	True	IndivQLearningParticleDNNOnlyOneHotMoreSeeds2/175_4_15_none	none		0.05
IndivQLearningParticleDNNOnlyOneHotMoreSeeds2/176_4_16	slugs_decentralized	shields/momentum_shield	True	-10	False	ParticleMomentum	False	False	10	-30	Individual_Deep_Q	1.0	simple_mlp	True	0.05	2500000	26	True	IndivQLearningParticleDNNOnlyOneHotMoreSeeds2/176_4_16_slugs_centralized	slugs_centralized	shields/momentum_shield	0.05
IndivQLearningParticleDNNOnlyOneHotMoreSeeds2/176_4_16	slugs_decentralized	shields/momentum_shield	True	-10	False	ParticleMomentum	False	False	10	-30	Individual_Deep_Q	1.0	simple_mlp	True	0.05	2500000	26	True	IndivQLearningParticleDNNOnlyOneHotMoreSeeds2/176_4_16_slugs_decentralized	slugs_decentralized	shields/momentum_shield	0.05
IndivQLearningParticleDNNOnlyOneHotMoreSeeds2/176_4_16	slugs_decentralized	shields/momentum_shield	True	-10	False	ParticleMomentum	False	False	10	-30	Individual_Deep_Q	1.0	simple_mlp	True	0.05	2500000	26	True	IndivQLearningParticleDNNOnlyOneHotMoreSeeds2/176_4_16_none	none		0.05
IndivQLearningParticleDNNOnlyOneHotMoreSeeds2/177_4_17	slugs_decentralized	shields/momentum_shield	True	-10	False	ParticleMomentum	False	False	10	-30	Individual_Deep_Q	1.0	simple_mlp	True	0.05	2500000	27	True	IndivQLearningParticleDNNOnlyOneHotMoreSeeds2/177_4_17_slugs_centralized	slugs_centralized	shields/momentum_shield	0.05
IndivQLearningParticleDNNOnlyOneHotMoreSeeds2/177_4_17	slugs_decentralized	shields/momentum_shield	True	-10	False	ParticleMomentum	False	False	10	-30	Individual_Deep_Q	1.0	simple_mlp	True	0.05	2500000	27	True	IndivQLearningParticleDNNOnlyOneHotMoreSeeds2/177_4_17_slugs_decentralized	slugs_decentralized	shields/momentum_shield	0.05
IndivQLearningParticleDNNOnlyOneHotMoreSeeds2/177_4_17	slugs_decentralized	shields/momentum_shield	True	-10	False	ParticleMomentum	False	False	10	-30	Individual_Deep_Q	1.0	simple_mlp	True	0.05	2500000	27	True	IndivQLearningParticleDNNOnlyOneHotMoreSeeds2/177_4_17_none	none		0.05
IndivQLearningParticleDNNOnlyOneHotMoreSeeds2/178_4_18	slugs_decentralized	shields/momentum_shield	True	-10	False	ParticleMomentum	False	False	10	-30	Individual_Deep_Q	1.0	simple_mlp	True	0.05	2500000	28	True	IndivQLearningParticleDNNOnlyOneHotMoreSeeds2/178_4_18_slugs_centralized	slugs_centralized	shields/momentum_shield	0.05
IndivQLearningParticleDNNOnlyOneHotMoreSeeds2/178_4_18	slugs_decentralized	shields/momentum_shield	True	-10	False	ParticleMomentum	False	False	10	-30	Individual_Deep_Q	1.0	simple_mlp	True	0.05	2500000	28	True	IndivQLearningParticleDNNOnlyOneHotMoreSeeds2/178_4_18_slugs_decentralized	slugs_decentralized	shields/momentum_shield	0.05
IndivQLearningParticleDNNOnlyOneHotMoreSeeds2/178_4_18	slugs_decentralized	shields/momentum_shield	True	-10	False	ParticleMomentum	False	False	10	-30	Individual_Deep_Q	1.0	simple_mlp	True	0.05	2500000	28	True	IndivQLearningParticleDNNOnlyOneHotMoreSeeds2/178_4_18_none	none		0.05
IndivQLearningParticleDNNOnlyOneHotMoreSeeds2/179_4_19	slugs_decentralized	shields/momentum_shield	True	-10	False	ParticleMomentum	False	False	10	-30	Individual_Deep_Q	1.0	simple_mlp	True	0.05	2500000	29	True	IndivQLearningParticleDNNOnlyOneHotMoreSeeds2/179_4_19_slugs_centralized	slugs_centralized	shields/momentum_shield	0.05
IndivQLearningParticleDNNOnlyOneHotMoreSeeds2/179_4_19	slugs_decentralized	shields/momentum_shield	True	-10	False	ParticleMomentum	False	False	10	-30	Individual_Deep_Q	1.0	simple_mlp	True	0.05	2500000	29	True	IndivQLearningParticleDNNOnlyOneHotMoreSeeds2/179_4_19_slugs_decentralized	slugs_decentralized	shields/momentum_shield	0.05
IndivQLearningParticleDNNOnlyOneHotMoreSeeds2/179_4_19	slugs_decentralized	shields/momentum_shield	True	-10	False	ParticleMomentum	False	False	10	-30	Individual_Deep_Q	1.0	simple_mlp	True	0.05	2500000	29	True	IndivQLearningParticleDNNOnlyOneHotMoreSeeds2/179_4_19_none	none		0.05
IndivQLearningParticleDNNOnlyOneHotMoreSeeds2/180_4_20	slugs_decentralized	shields/momentum_shield	True	-10	False	ParticleMomentum	False	False	10	-30	Individual_Deep_Q	1.0	simple_mlp	True	0.05	2500000	30	True	IndivQLearningParticleDNNOnlyOneHotMoreSeeds2/180_4_20_slugs_centralized	slugs_centralized	shields/momentum_shield	0.05
IndivQLearningParticleDNNOnlyOneHotMoreSeeds2/180_4_20	slugs_decentralized	shields/momentum_shield	True	-10	False	ParticleMomentum	False	False	10	-30	Individual_Deep_Q	1.0	simple_mlp	True	0.05	2500000	30	True	IndivQLearningParticleDNNOnlyOneHotMoreSeeds2/180_4_20_slugs_decentralized	slugs_decentralized	shields/momentum_shield	0.05
IndivQLearningParticleDNNOnlyOneHotMoreSeeds2/180_4_20	slugs_decentralized	shields/momentum_shield	True	-10	False	ParticleMomentum	False	False	10	-30	Individual_Deep_Q	1.0	simple_mlp	True	0.05	2500000	30	True	IndivQLearningParticleDNNOnlyOneHotMoreSeeds2/180_4_20_none	none		0.05
IndivQLearningParticleDNNOnlyOneHotMoreSeeds2/181_4_21	slugs_decentralized	shields/momentum_shield	True	-10	False	ParticleMomentum	False	False	10	-30	Individual_Deep_Q	1.0	simple_mlp	True	0.05	2500000	31	True	IndivQLearningParticleDNNOnlyOneHotMoreSeeds2/181_4_21_slugs_centralized	slugs_centralized	shields/momentum_shield	0.05
IndivQLearningParticleDNNOnlyOneHotMoreSeeds2/181_4_21	slugs_decentralized	shields/momentum_shield	True	-10	False	ParticleMomentum	False	False	10	-30	Individual_Deep_Q	1.0	simple_mlp	True	0.05	2500000	31	True	IndivQLearningParticleDNNOnlyOneHotMoreSeeds2/181_4_21_slugs_decentralized	slugs_decentralized	shields/momentum_shield	0.05
IndivQLearningParticleDNNOnlyOneHotMoreSeeds2/181_4_21	slugs_decentralized	shields/momentum_shield	True	-10	False	ParticleMomentum	False	False	10	-30	Individual_Deep_Q	1.0	simple_mlp	True	0.05	2500000	31	True	IndivQLearningParticleDNNOnlyOneHotMoreSeeds2/181_4_21_none	none		0.05
IndivQLearningParticleDNNOnlyOneHotMoreSeeds2/182_4_22	slugs_decentralized	shields/momentum_shield	True	-10	False	ParticleMomentum	False	False	10	-30	Individual_Deep_Q	1.0	simple_mlp	True	0.05	2500000	32	True	IndivQLearningParticleDNNOnlyOneHotMoreSeeds2/182_4_22_slugs_centralized	slugs_centralized	shields/momentum_shield	0.05
IndivQLearningParticleDNNOnlyOneHotMoreSeeds2/182_4_22	slugs_decentralized	shields/momentum_shield	True	-10	False	ParticleMomentum	False	False	10	-30	Individual_Deep_Q	1.0	simple_mlp	True	0.05	2500000	32	True	IndivQLearningParticleDNNOnlyOneHotMoreSeeds2/182_4_22_slugs_decentralized	slugs_decentralized	shields/momentum_shield	0.05
IndivQLearningParticleDNNOnlyOneHotMoreSeeds2/182_4_22	slugs_decentralized	shields/momentum_shield	True	-10	False	ParticleMomentum	False	False	10	-30	Individual_Deep_Q	1.0	simple_mlp	True	0.05	2500000	32	True	IndivQLearningParticleDNNOnlyOneHotMoreSeeds2/182_4_22_none	none		0.05
IndivQLearningParticleDNNOnlyOneHotMoreSeeds2/183_4_23	slugs_decentralized	shields/momentum_shield	True	-10	False	ParticleMomentum	False	False	10	-30	Individual_Deep_Q	1.0	simple_mlp	True	0.05	2500000	33	True	IndivQLearningParticleDNNOnlyOneHotMoreSeeds2/183_4_23_slugs_centralized	slugs_centralized	shields/momentum_shield	0.05
IndivQLearningParticleDNNOnlyOneHotMoreSeeds2/183_4_23	slugs_decentralized	shields/momentum_shield	True	-10	False	ParticleMomentum	False	False	10	-30	Individual_Deep_Q	1.0	simple_mlp	True	0.05	2500000	33	True	IndivQLearningParticleDNNOnlyOneHotMoreSeeds2/183_4_23_slugs_decentralized	slugs_decentralized	shields/momentum_shield	0.05
IndivQLearningParticleDNNOnlyOneHotMoreSeeds2/183_4_23	slugs_decentralized	shields/momentum_shield	True	-10	False	ParticleMomentum	False	False	10	-30	Individual_Deep_Q	1.0	simple_mlp	True	0.05	2500000	33	True	IndivQLearningParticleDNNOnlyOneHotMoreSeeds2/183_4_23_none	none		0.05
IndivQLearningParticleDNNOnlyOneHotMoreSeeds2/184_4_24	slugs_decentralized	shields/momentum_shield	True	-10	False	ParticleMomentum	False	False	10	-30	Individual_Deep_Q	1.0	simple_mlp	True	0.05	2500000	34	True	IndivQLearningParticleDNNOnlyOneHotMoreSeeds2/184_4_24_slugs_centralized	slugs_centralized	shields/momentum_shield	0.05
IndivQLearningParticleDNNOnlyOneHotMoreSeeds2/184_4_24	slugs_decentralized	shields/momentum_shield	True	-10	False	ParticleMomentum	False	False	10	-30	Individual_Deep_Q	1.0	simple_mlp	True	0.05	2500000	34	True	IndivQLearningParticleDNNOnlyOneHotMoreSeeds2/184_4_24_slugs_decentralized	slugs_decentralized	shields/momentum_shield	0.05
IndivQLearningParticleDNNOnlyOneHotMoreSeeds2/184_4_24	slugs_decentralized	shields/momentum_shield	True	-10	False	ParticleMomentum	False	False	10	-30	Individual_Deep_Q	1.0	simple_mlp	True	0.05	2500000	34	True	IndivQLearningParticleDNNOnlyOneHotMoreSeeds2/184_4_24_none	none		0.05
IndivQLearningParticleDNNOnlyOneHotMoreSeeds2/185_4_25	slugs_decentralized	shields/momentum_shield	True	-10	False	ParticleMomentum	False	False	10	-30	Individual_Deep_Q	1.0	simple_mlp	True	0.05	2500000	35	True	IndivQLearningParticleDNNOnlyOneHotMoreSeeds2/185_4_25_slugs_centralized	slugs_centralized	shields/momentum_shield	0.05
IndivQLearningParticleDNNOnlyOneHotMoreSeeds2/185_4_25	slugs_decentralized	shields/momentum_shield	True	-10	False	ParticleMomentum	False	False	10	-30	Individual_Deep_Q	1.0	simple_mlp	True	0.05	2500000	35	True	IndivQLearningParticleDNNOnlyOneHotMoreSeeds2/185_4_25_slugs_decentralized	slugs_decentralized	shields/momentum_shield	0.05
IndivQLearningParticleDNNOnlyOneHotMoreSeeds2/185_4_25	slugs_decentralized	shields/momentum_shield	True	-10	False	ParticleMomentum	False	False	10	-30	Individual_Deep_Q	1.0	simple_mlp	True	0.05	2500000	35	True	IndivQLearningParticleDNNOnlyOneHotMoreSeeds2/185_4_25_none	none		0.05
IndivQLearningParticleDNNOnlyOneHotMoreSeeds2/186_4_26	slugs_decentralized	shields/momentum_shield	True	-10	False	ParticleMomentum	False	False	10	-30	Individual_Deep_Q	1.0	simple_mlp	True	0.05	2500000	36	True	IndivQLearningParticleDNNOnlyOneHotMoreSeeds2/186_4_26_slugs_centralized	slugs_centralized	shields/momentum_shield	0.05
IndivQLearningParticleDNNOnlyOneHotMoreSeeds2/186_4_26	slugs_decentralized	shields/momentum_shield	True	-10	False	ParticleMomentum	False	False	10	-30	Individual_Deep_Q	1.0	simple_mlp	True	0.05	2500000	36	True	IndivQLearningParticleDNNOnlyOneHotMoreSeeds2/186_4_26_slugs_decentralized	slugs_decentralized	shields/momentum_shield	0.05
IndivQLearningParticleDNNOnlyOneHotMoreSeeds2/186_4_26	slugs_decentralized	shields/momentum_shield	True	-10	False	ParticleMomentum	False	False	10	-30	Individual_Deep_Q	1.0	simple_mlp	True	0.05	2500000	36	True	IndivQLearningParticleDNNOnlyOneHotMoreSeeds2/186_4_26_none	none		0.05
IndivQLearningParticleDNNOnlyOneHotMoreSeeds2/187_4_27	slugs_decentralized	shields/momentum_shield	True	-10	False	ParticleMomentum	False	False	10	-30	Individual_Deep_Q	1.0	simple_mlp	True	0.05	2500000	37	True	IndivQLearningParticleDNNOnlyOneHotMoreSeeds2/187_4_27_slugs_centralized	slugs_centralized	shields/momentum_shield	0.05
IndivQLearningParticleDNNOnlyOneHotMoreSeeds2/187_4_27	slugs_decentralized	shields/momentum_shield	True	-10	False	ParticleMomentum	False	False	10	-30	Individual_Deep_Q	1.0	simple_mlp	True	0.05	2500000	37	True	IndivQLearningParticleDNNOnlyOneHotMoreSeeds2/187_4_27_slugs_decentralized	slugs_decentralized	shields/momentum_shield	0.05
IndivQLearningParticleDNNOnlyOneHotMoreSeeds2/187_4_27	slugs_decentralized	shields/momentum_shield	True	-10	False	ParticleMomentum	False	False	10	-30	Individual_Deep_Q	1.0	simple_mlp	True	0.05	2500000	37	True	IndivQLearningParticleDNNOnlyOneHotMoreSeeds2/187_4_27_none	none		0.05
IndivQLearningParticleDNNOnlyOneHotMoreSeeds2/188_4_28	slugs_decentralized	shields/momentum_shield	True	-10	False	ParticleMomentum	False	False	10	-30	Individual_Deep_Q	1.0	simple_mlp	True	0.05	2500000	38	True	IndivQLearningParticleDNNOnlyOneHotMoreSeeds2/188_4_28_slugs_centralized	slugs_centralized	shields/momentum_shield	0.05
IndivQLearningParticleDNNOnlyOneHotMoreSeeds2/188_4_28	slugs_decentralized	shields/momentum_shield	True	-10	False	ParticleMomentum	False	False	10	-30	Individual_Deep_Q	1.0	simple_mlp	True	0.05	2500000	38	True	IndivQLearningParticleDNNOnlyOneHotMoreSeeds2/188_4_28_slugs_decentralized	slugs_decentralized	shields/momentum_shield	0.05
IndivQLearningParticleDNNOnlyOneHotMoreSeeds2/188_4_28	slugs_decentralized	shields/momentum_shield	True	-10	False	ParticleMomentum	False	False	10	-30	Individual_Deep_Q	1.0	simple_mlp	True	0.05	2500000	38	True	IndivQLearningParticleDNNOnlyOneHotMoreSeeds2/188_4_28_none	none		0.05
IndivQLearningParticleDNNOnlyOneHotMoreSeeds2/189_4_29	slugs_decentralized	shields/momentum_shield	True	-10	False	ParticleMomentum	False	False	10	-30	Individual_Deep_Q	1.0	simple_mlp	True	0.05	2500000	39	True	IndivQLearningParticleDNNOnlyOneHotMoreSeeds2/189_4_29_slugs_centralized	slugs_centralized	shields/momentum_shield	0.05
IndivQLearningParticleDNNOnlyOneHotMoreSeeds2/189_4_29	slugs_decentralized	shields/momentum_shield	True	-10	False	ParticleMomentum	False	False	10	-30	Individual_Deep_Q	1.0	simple_mlp	True	0.05	2500000	39	True	IndivQLearningParticleDNNOnlyOneHotMoreSeeds2/189_4_29_slugs_decentralized	slugs_decentralized	shields/momentum_shield	0.05
IndivQLearningParticleDNNOnlyOneHotMoreSeeds2/189_4_29	slugs_decentralized	shields/momentum_shield	True	-10	False	ParticleMomentum	False	False	10	-30	Individual_Deep_Q	1.0	simple_mlp	True	0.05	2500000	39	True	IndivQLearningParticleDNNOnlyOneHotMoreSeeds2/189_4_29_none	none		0.05
IndivQLearningParticleDNNOnlyOneHotMoreSeeds2/190_4_30	slugs_decentralized	shields/momentum_shield	True	-10	False	ParticleMomentum	False	False	10	-30	Individual_Deep_Q	1.0	simple_mlp	True	0.05	2500000	40	True	IndivQLearningParticleDNNOnlyOneHotMoreSeeds2/190_4_30_slugs_centralized	slugs_centralized	shields/momentum_shield	0.05
IndivQLearningParticleDNNOnlyOneHotMoreSeeds2/190_4_30	slugs_decentralized	shields/momentum_shield	True	-10	False	ParticleMomentum	False	False	10	-30	Individual_Deep_Q	1.0	simple_mlp	True	0.05	2500000	40	True	IndivQLearningParticleDNNOnlyOneHotMoreSeeds2/190_4_30_slugs_decentralized	slugs_decentralized	shields/momentum_shield	0.05
IndivQLearningParticleDNNOnlyOneHotMoreSeeds2/190_4_30	slugs_decentralized	shields/momentum_shield	True	-10	False	ParticleMomentum	False	False	10	-30	Individual_Deep_Q	1.0	simple_mlp	True	0.05	2500000	40	True	IndivQLearningParticleDNNOnlyOneHotMoreSeeds2/190_4_30_none	none		0.05
IndivQLearningParticleDNNOnlyOneHotMoreSeeds2/191_4_31	slugs_decentralized	shields/momentum_shield	True	-10	False	ParticleMomentum	False	False	10	-30	Individual_Deep_Q	1.0	simple_mlp	True	0.05	2500000	41	True	IndivQLearningParticleDNNOnlyOneHotMoreSeeds2/191_4_31_slugs_centralized	slugs_centralized	shields/momentum_shield	0.05
IndivQLearningParticleDNNOnlyOneHotMoreSeeds2/191_4_31	slugs_decentralized	shields/momentum_shield	True	-10	False	ParticleMomentum	False	False	10	-30	Individual_Deep_Q	1.0	simple_mlp	True	0.05	2500000	41	True	IndivQLearningParticleDNNOnlyOneHotMoreSeeds2/191_4_31_slugs_decentralized	slugs_decentralized	shields/momentum_shield	0.05
IndivQLearningParticleDNNOnlyOneHotMoreSeeds2/191_4_31	slugs_decentralized	shields/momentum_shield	True	-10	False	ParticleMomentum	False	False	10	-30	Individual_Deep_Q	1.0	simple_mlp	True	0.05	2500000	41	True	IndivQLearningParticleDNNOnlyOneHotMoreSeeds2/191_4_31_none	none		0.05
IndivQLearningParticleDNNOnlyOneHotMoreSeeds2/192_4_32	slugs_decentralized	shields/momentum_shield	True	-10	False	ParticleMomentum	False	False	10	-30	Individual_Deep_Q	1.0	simple_mlp	True	0.05	2500000	42	True	IndivQLearningParticleDNNOnlyOneHotMoreSeeds2/192_4_32_slugs_centralized	slugs_centralized	shields/momentum_shield	0.05
IndivQLearningParticleDNNOnlyOneHotMoreSeeds2/192_4_32	slugs_decentralized	shields/momentum_shield	True	-10	False	ParticleMomentum	False	False	10	-30	Individual_Deep_Q	1.0	simple_mlp	True	0.05	2500000	42	True	IndivQLearningParticleDNNOnlyOneHotMoreSeeds2/192_4_32_slugs_decentralized	slugs_decentralized	shields/momentum_shield	0.05
IndivQLearningParticleDNNOnlyOneHotMoreSeeds2/192_4_32	slugs_decentralized	shields/momentum_shield	True	-10	False	ParticleMomentum	False	False	10	-30	Individual_Deep_Q	1.0	simple_mlp	True	0.05	2500000	42	True	IndivQLearningParticleDNNOnlyOneHotMoreSeeds2/192_4_32_none	none		0.05
IndivQLearningParticleDNNOnlyOneHotMoreSeeds2/193_4_33	slugs_decentralized	shields/momentum_shield	True	-10	False	ParticleMomentum	False	False	10	-30	Individual_Deep_Q	1.0	simple_mlp	True	0.05	2500000	43	True	IndivQLearningParticleDNNOnlyOneHotMoreSeeds2/193_4_33_slugs_centralized	slugs_centralized	shields/momentum_shield	0.05
IndivQLearningParticleDNNOnlyOneHotMoreSeeds2/193_4_33	slugs_decentralized	shields/momentum_shield	True	-10	False	ParticleMomentum	False	False	10	-30	Individual_Deep_Q	1.0	simple_mlp	True	0.05	2500000	43	True	IndivQLearningParticleDNNOnlyOneHotMoreSeeds2/193_4_33_slugs_decentralized	slugs_decentralized	shields/momentum_shield	0.05
IndivQLearningParticleDNNOnlyOneHotMoreSeeds2/193_4_33	slugs_decentralized	shields/momentum_shield	True	-10	False	ParticleMomentum	False	False	10	-30	Individual_Deep_Q	1.0	simple_mlp	True	0.05	2500000	43	True	IndivQLearningParticleDNNOnlyOneHotMoreSeeds2/193_4_33_none	none		0.05
IndivQLearningParticleDNNOnlyOneHotMoreSeeds2/194_4_34	slugs_decentralized	shields/momentum_shield	True	-10	False	ParticleMomentum	False	False	10	-30	Individual_Deep_Q	1.0	simple_mlp	True	0.05	2500000	44	True	IndivQLearningParticleDNNOnlyOneHotMoreSeeds2/194_4_34_slugs_centralized	slugs_centralized	shields/momentum_shield	0.05
IndivQLearningParticleDNNOnlyOneHotMoreSeeds2/194_4_34	slugs_decentralized	shields/momentum_shield	True	-10	False	ParticleMomentum	False	False	10	-30	Individual_Deep_Q	1.0	simple_mlp	True	0.05	2500000	44	True	IndivQLearningParticleDNNOnlyOneHotMoreSeeds2/194_4_34_slugs_decentralized	slugs_decentralized	shields/momentum_shield	0.05
IndivQLearningParticleDNNOnlyOneHotMoreSeeds2/194_4_34	slugs_decentralized	shields/momentum_shield	True	-10	False	ParticleMomentum	False	False	10	-30	Individual_Deep_Q	1.0	simple_mlp	True	0.05	2500000	44	True	IndivQLearningParticleDNNOnlyOneHotMoreSeeds2/194_4_34_none	none		0.05
IndivQLearningParticleDNNOnlyOneHotMoreSeeds2/195_4_35	slugs_decentralized	shields/momentum_shield	True	-10	False	ParticleMomentum	False	False	10	-30	Individual_Deep_Q	1.0	simple_mlp	True	0.05	2500000	45	True	IndivQLearningParticleDNNOnlyOneHotMoreSeeds2/195_4_35_slugs_centralized	slugs_centralized	shields/momentum_shield	0.05
IndivQLearningParticleDNNOnlyOneHotMoreSeeds2/195_4_35	slugs_decentralized	shields/momentum_shield	True	-10	False	ParticleMomentum	False	False	10	-30	Individual_Deep_Q	1.0	simple_mlp	True	0.05	2500000	45	True	IndivQLearningParticleDNNOnlyOneHotMoreSeeds2/195_4_35_slugs_decentralized	slugs_decentralized	shields/momentum_shield	0.05
IndivQLearningParticleDNNOnlyOneHotMoreSeeds2/195_4_35	slugs_decentralized	shields/momentum_shield	True	-10	False	ParticleMomentum	False	False	10	-30	Individual_Deep_Q	1.0	simple_mlp	True	0.05	2500000	45	True	IndivQLearningParticleDNNOnlyOneHotMoreSeeds2/195_4_35_none	none		0.05
IndivQLearningParticleDNNOnlyOneHotMoreSeeds2/196_4_36	slugs_decentralized	shields/momentum_shield	True	-10	False	ParticleMomentum	False	False	10	-30	Individual_Deep_Q	1.0	simple_mlp	True	0.05	2500000	46	True	IndivQLearningParticleDNNOnlyOneHotMoreSeeds2/196_4_36_slugs_centralized	slugs_centralized	shields/momentum_shield	0.05
IndivQLearningParticleDNNOnlyOneHotMoreSeeds2/196_4_36	slugs_decentralized	shields/momentum_shield	True	-10	False	ParticleMomentum	False	False	10	-30	Individual_Deep_Q	1.0	simple_mlp	True	0.05	2500000	46	True	IndivQLearningParticleDNNOnlyOneHotMoreSeeds2/196_4_36_slugs_decentralized	slugs_decentralized	shields/momentum_shield	0.05
IndivQLearningParticleDNNOnlyOneHotMoreSeeds2/196_4_36	slugs_decentralized	shields/momentum_shield	True	-10	False	ParticleMomentum	False	False	10	-30	Individual_Deep_Q	1.0	simple_mlp	True	0.05	2500000	46	True	IndivQLearningParticleDNNOnlyOneHotMoreSeeds2/196_4_36_none	none		0.05
IndivQLearningParticleDNNOnlyOneHotMoreSeeds2/197_4_37	slugs_decentralized	shields/momentum_shield	True	-10	False	ParticleMomentum	False	False	10	-30	Individual_Deep_Q	1.0	simple_mlp	True	0.05	2500000	47	True	IndivQLearningParticleDNNOnlyOneHotMoreSeeds2/197_4_37_slugs_centralized	slugs_centralized	shields/momentum_shield	0.05
IndivQLearningParticleDNNOnlyOneHotMoreSeeds2/197_4_37	slugs_decentralized	shields/momentum_shield	True	-10	False	ParticleMomentum	False	False	10	-30	Individual_Deep_Q	1.0	simple_mlp	True	0.05	2500000	47	True	IndivQLearningParticleDNNOnlyOneHotMoreSeeds2/197_4_37_slugs_decentralized	slugs_decentralized	shields/momentum_shield	0.05
IndivQLearningParticleDNNOnlyOneHotMoreSeeds2/197_4_37	slugs_decentralized	shields/momentum_shield	True	-10	False	ParticleMomentum	False	False	10	-30	Individual_Deep_Q	1.0	simple_mlp	True	0.05	2500000	47	True	IndivQLearningParticleDNNOnlyOneHotMoreSeeds2/197_4_37_none	none		0.05
IndivQLearningParticleDNNOnlyOneHotMoreSeeds2/198_4_38	slugs_decentralized	shields/momentum_shield	True	-10	False	ParticleMomentum	False	False	10	-30	Individual_Deep_Q	1.0	simple_mlp	True	0.05	2500000	48	True	IndivQLearningParticleDNNOnlyOneHotMoreSeeds2/198_4_38_slugs_centralized	slugs_centralized	shields/momentum_shield	0.05
IndivQLearningParticleDNNOnlyOneHotMoreSeeds2/198_4_38	slugs_decentralized	shields/momentum_shield	True	-10	False	ParticleMomentum	False	False	10	-30	Individual_Deep_Q	1.0	simple_mlp	True	0.05	2500000	48	True	IndivQLearningParticleDNNOnlyOneHotMoreSeeds2/198_4_38_slugs_decentralized	slugs_decentralized	shields/momentum_shield	0.05
IndivQLearningParticleDNNOnlyOneHotMoreSeeds2/198_4_38	slugs_decentralized	shields/momentum_shield	True	-10	False	ParticleMomentum	False	False	10	-30	Individual_Deep_Q	1.0	simple_mlp	True	0.05	2500000	48	True	IndivQLearningParticleDNNOnlyOneHotMoreSeeds2/198_4_38_none	none		0.05
IndivQLearningParticleDNNOnlyOneHotMoreSeeds2/199_4_39	slugs_decentralized	shields/momentum_shield	True	-10	False	ParticleMomentum	False	False	10	-30	Individual_Deep_Q	1.0	simple_mlp	True	0.05	2500000	49	True	IndivQLearningParticleDNNOnlyOneHotMoreSeeds2/199_4_39_slugs_centralized	slugs_centralized	shields/momentum_shield	0.05
IndivQLearningParticleDNNOnlyOneHotMoreSeeds2/199_4_39	slugs_decentralized	shields/momentum_shield	True	-10	False	ParticleMomentum	False	False	10	-30	Individual_Deep_Q	1.0	simple_mlp	True	0.05	2500000	49	True	IndivQLearningParticleDNNOnlyOneHotMoreSeeds2/199_4_39_slugs_decentralized	slugs_decentralized	shields/momentum_shield	0.05
IndivQLearningParticleDNNOnlyOneHotMoreSeeds2/199_4_39	slugs_decentralized	shields/momentum_shield	True	-10	False	ParticleMomentum	False	False	10	-30	Individual_Deep_Q	1.0	simple_mlp	True	0.05	2500000	49	True	IndivQLearningParticleDNNOnlyOneHotMoreSeeds2/199_4_39_none	none		0.05
IndivQLearningParticleDNNOnlyOneHotMoreSeeds2/200_5_0	none		True	-10	False	ParticleMomentum	False	False	10	-30	Individual_Deep_Q	1.0	simple_mlp	True	0.05	2500000	10	True	IndivQLearningParticleDNNOnlyOneHotMoreSeeds2/200_5_0_slugs_centralized	slugs_centralized	shields/momentum_shield	0.05
IndivQLearningParticleDNNOnlyOneHotMoreSeeds2/200_5_0	none		True	-10	False	ParticleMomentum	False	False	10	-30	Individual_Deep_Q	1.0	simple_mlp	True	0.05	2500000	10	True	IndivQLearningParticleDNNOnlyOneHotMoreSeeds2/200_5_0_slugs_decentralized	slugs_decentralized	shields/momentum_shield	0.05
IndivQLearningParticleDNNOnlyOneHotMoreSeeds2/200_5_0	none		True	-10	False	ParticleMomentum	False	False	10	-30	Individual_Deep_Q	1.0	simple_mlp	True	0.05	2500000	10	True	IndivQLearningParticleDNNOnlyOneHotMoreSeeds2/200_5_0_none	none		0.05
IndivQLearningParticleDNNOnlyOneHotMoreSeeds2/201_5_1	none		True	-10	False	ParticleMomentum	False	False	10	-30	Individual_Deep_Q	1.0	simple_mlp	True	0.05	2500000	11	True	IndivQLearningParticleDNNOnlyOneHotMoreSeeds2/201_5_1_slugs_centralized	slugs_centralized	shields/momentum_shield	0.05
IndivQLearningParticleDNNOnlyOneHotMoreSeeds2/201_5_1	none		True	-10	False	ParticleMomentum	False	False	10	-30	Individual_Deep_Q	1.0	simple_mlp	True	0.05	2500000	11	True	IndivQLearningParticleDNNOnlyOneHotMoreSeeds2/201_5_1_slugs_decentralized	slugs_decentralized	shields/momentum_shield	0.05
IndivQLearningParticleDNNOnlyOneHotMoreSeeds2/201_5_1	none		True	-10	False	ParticleMomentum	False	False	10	-30	Individual_Deep_Q	1.0	simple_mlp	True	0.05	2500000	11	True	IndivQLearningParticleDNNOnlyOneHotMoreSeeds2/201_5_1_none	none		0.05
IndivQLearningParticleDNNOnlyOneHotMoreSeeds2/202_5_2	none		True	-10	False	ParticleMomentum	False	False	10	-30	Individual_Deep_Q	1.0	simple_mlp	True	0.05	2500000	12	True	IndivQLearningParticleDNNOnlyOneHotMoreSeeds2/202_5_2_slugs_centralized	slugs_centralized	shields/momentum_shield	0.05
IndivQLearningParticleDNNOnlyOneHotMoreSeeds2/202_5_2	none		True	-10	False	ParticleMomentum	False	False	10	-30	Individual_Deep_Q	1.0	simple_mlp	True	0.05	2500000	12	True	IndivQLearningParticleDNNOnlyOneHotMoreSeeds2/202_5_2_slugs_decentralized	slugs_decentralized	shields/momentum_shield	0.05
IndivQLearningParticleDNNOnlyOneHotMoreSeeds2/202_5_2	none		True	-10	False	ParticleMomentum	False	False	10	-30	Individual_Deep_Q	1.0	simple_mlp	True	0.05	2500000	12	True	IndivQLearningParticleDNNOnlyOneHotMoreSeeds2/202_5_2_none	none		0.05
IndivQLearningParticleDNNOnlyOneHotMoreSeeds2/203_5_3	none		True	-10	False	ParticleMomentum	False	False	10	-30	Individual_Deep_Q	1.0	simple_mlp	True	0.05	2500000	13	True	IndivQLearningParticleDNNOnlyOneHotMoreSeeds2/203_5_3_slugs_centralized	slugs_centralized	shields/momentum_shield	0.05
IndivQLearningParticleDNNOnlyOneHotMoreSeeds2/203_5_3	none		True	-10	False	ParticleMomentum	False	False	10	-30	Individual_Deep_Q	1.0	simple_mlp	True	0.05	2500000	13	True	IndivQLearningParticleDNNOnlyOneHotMoreSeeds2/203_5_3_slugs_decentralized	slugs_decentralized	shields/momentum_shield	0.05
IndivQLearningParticleDNNOnlyOneHotMoreSeeds2/203_5_3	none		True	-10	False	ParticleMomentum	False	False	10	-30	Individual_Deep_Q	1.0	simple_mlp	True	0.05	2500000	13	True	IndivQLearningParticleDNNOnlyOneHotMoreSeeds2/203_5_3_none	none		0.05
IndivQLearningParticleDNNOnlyOneHotMoreSeeds2/204_5_4	none		True	-10	False	ParticleMomentum	False	False	10	-30	Individual_Deep_Q	1.0	simple_mlp	True	0.05	2500000	14	True	IndivQLearningParticleDNNOnlyOneHotMoreSeeds2/204_5_4_slugs_centralized	slugs_centralized	shields/momentum_shield	0.05
IndivQLearningParticleDNNOnlyOneHotMoreSeeds2/204_5_4	none		True	-10	False	ParticleMomentum	False	False	10	-30	Individual_Deep_Q	1.0	simple_mlp	True	0.05	2500000	14	True	IndivQLearningParticleDNNOnlyOneHotMoreSeeds2/204_5_4_slugs_decentralized	slugs_decentralized	shields/momentum_shield	0.05
IndivQLearningParticleDNNOnlyOneHotMoreSeeds2/204_5_4	none		True	-10	False	ParticleMomentum	False	False	10	-30	Individual_Deep_Q	1.0	simple_mlp	True	0.05	2500000	14	True	IndivQLearningParticleDNNOnlyOneHotMoreSeeds2/204_5_4_none	none		0.05
IndivQLearningParticleDNNOnlyOneHotMoreSeeds2/205_5_5	none		True	-10	False	ParticleMomentum	False	False	10	-30	Individual_Deep_Q	1.0	simple_mlp	True	0.05	2500000	15	True	IndivQLearningParticleDNNOnlyOneHotMoreSeeds2/205_5_5_slugs_centralized	slugs_centralized	shields/momentum_shield	0.05
IndivQLearningParticleDNNOnlyOneHotMoreSeeds2/205_5_5	none		True	-10	False	ParticleMomentum	False	False	10	-30	Individual_Deep_Q	1.0	simple_mlp	True	0.05	2500000	15	True	IndivQLearningParticleDNNOnlyOneHotMoreSeeds2/205_5_5_slugs_decentralized	slugs_decentralized	shields/momentum_shield	0.05
IndivQLearningParticleDNNOnlyOneHotMoreSeeds2/205_5_5	none		True	-10	False	ParticleMomentum	False	False	10	-30	Individual_Deep_Q	1.0	simple_mlp	True	0.05	2500000	15	True	IndivQLearningParticleDNNOnlyOneHotMoreSeeds2/205_5_5_none	none		0.05
IndivQLearningParticleDNNOnlyOneHotMoreSeeds2/206_5_6	none		True	-10	False	ParticleMomentum	False	False	10	-30	Individual_Deep_Q	1.0	simple_mlp	True	0.05	2500000	16	True	IndivQLearningParticleDNNOnlyOneHotMoreSeeds2/206_5_6_slugs_centralized	slugs_centralized	shields/momentum_shield	0.05
IndivQLearningParticleDNNOnlyOneHotMoreSeeds2/206_5_6	none		True	-10	False	ParticleMomentum	False	False	10	-30	Individual_Deep_Q	1.0	simple_mlp	True	0.05	2500000	16	True	IndivQLearningParticleDNNOnlyOneHotMoreSeeds2/206_5_6_slugs_decentralized	slugs_decentralized	shields/momentum_shield	0.05
IndivQLearningParticleDNNOnlyOneHotMoreSeeds2/206_5_6	none		True	-10	False	ParticleMomentum	False	False	10	-30	Individual_Deep_Q	1.0	simple_mlp	True	0.05	2500000	16	True	IndivQLearningParticleDNNOnlyOneHotMoreSeeds2/206_5_6_none	none		0.05
IndivQLearningParticleDNNOnlyOneHotMoreSeeds2/207_5_7	none		True	-10	False	ParticleMomentum	False	False	10	-30	Individual_Deep_Q	1.0	simple_mlp	True	0.05	2500000	17	True	IndivQLearningParticleDNNOnlyOneHotMoreSeeds2/207_5_7_slugs_centralized	slugs_centralized	shields/momentum_shield	0.05
IndivQLearningParticleDNNOnlyOneHotMoreSeeds2/207_5_7	none		True	-10	False	ParticleMomentum	False	False	10	-30	Individual_Deep_Q	1.0	simple_mlp	True	0.05	2500000	17	True	IndivQLearningParticleDNNOnlyOneHotMoreSeeds2/207_5_7_slugs_decentralized	slugs_decentralized	shields/momentum_shield	0.05
IndivQLearningParticleDNNOnlyOneHotMoreSeeds2/207_5_7	none		True	-10	False	ParticleMomentum	False	False	10	-30	Individual_Deep_Q	1.0	simple_mlp	True	0.05	2500000	17	True	IndivQLearningParticleDNNOnlyOneHotMoreSeeds2/207_5_7_none	none		0.05
IndivQLearningParticleDNNOnlyOneHotMoreSeeds2/208_5_8	none		True	-10	False	ParticleMomentum	False	False	10	-30	Individual_Deep_Q	1.0	simple_mlp	True	0.05	2500000	18	True	IndivQLearningParticleDNNOnlyOneHotMoreSeeds2/208_5_8_slugs_centralized	slugs_centralized	shields/momentum_shield	0.05
IndivQLearningParticleDNNOnlyOneHotMoreSeeds2/208_5_8	none		True	-10	False	ParticleMomentum	False	False	10	-30	Individual_Deep_Q	1.0	simple_mlp	True	0.05	2500000	18	True	IndivQLearningParticleDNNOnlyOneHotMoreSeeds2/208_5_8_slugs_decentralized	slugs_decentralized	shields/momentum_shield	0.05
IndivQLearningParticleDNNOnlyOneHotMoreSeeds2/208_5_8	none		True	-10	False	ParticleMomentum	False	False	10	-30	Individual_Deep_Q	1.0	simple_mlp	True	0.05	2500000	18	True	IndivQLearningParticleDNNOnlyOneHotMoreSeeds2/208_5_8_none	none		0.05
IndivQLearningParticleDNNOnlyOneHotMoreSeeds2/209_5_9	none		True	-10	False	ParticleMomentum	False	False	10	-30	Individual_Deep_Q	1.0	simple_mlp	True	0.05	2500000	19	True	IndivQLearningParticleDNNOnlyOneHotMoreSeeds2/209_5_9_slugs_centralized	slugs_centralized	shields/momentum_shield	0.05
IndivQLearningParticleDNNOnlyOneHotMoreSeeds2/209_5_9	none		True	-10	False	ParticleMomentum	False	False	10	-30	Individual_Deep_Q	1.0	simple_mlp	True	0.05	2500000	19	True	IndivQLearningParticleDNNOnlyOneHotMoreSeeds2/209_5_9_slugs_decentralized	slugs_decentralized	shields/momentum_shield	0.05
IndivQLearningParticleDNNOnlyOneHotMoreSeeds2/209_5_9	none		True	-10	False	ParticleMomentum	False	False	10	-30	Individual_Deep_Q	1.0	simple_mlp	True	0.05	2500000	19	True	IndivQLearningParticleDNNOnlyOneHotMoreSeeds2/209_5_9_none	none		0.05
IndivQLearningParticleDNNOnlyOneHotMoreSeeds2/210_5_10	none		True	-10	False	ParticleMomentum	False	False	10	-30	Individual_Deep_Q	1.0	simple_mlp	True	0.05	2500000	20	True	IndivQLearningParticleDNNOnlyOneHotMoreSeeds2/210_5_10_slugs_centralized	slugs_centralized	shields/momentum_shield	0.05
IndivQLearningParticleDNNOnlyOneHotMoreSeeds2/210_5_10	none		True	-10	False	ParticleMomentum	False	False	10	-30	Individual_Deep_Q	1.0	simple_mlp	True	0.05	2500000	20	True	IndivQLearningParticleDNNOnlyOneHotMoreSeeds2/210_5_10_slugs_decentralized	slugs_decentralized	shields/momentum_shield	0.05
IndivQLearningParticleDNNOnlyOneHotMoreSeeds2/210_5_10	none		True	-10	False	ParticleMomentum	False	False	10	-30	Individual_Deep_Q	1.0	simple_mlp	True	0.05	2500000	20	True	IndivQLearningParticleDNNOnlyOneHotMoreSeeds2/210_5_10_none	none		0.05
IndivQLearningParticleDNNOnlyOneHotMoreSeeds2/211_5_11	none		True	-10	False	ParticleMomentum	False	False	10	-30	Individual_Deep_Q	1.0	simple_mlp	True	0.05	2500000	21	True	IndivQLearningParticleDNNOnlyOneHotMoreSeeds2/211_5_11_slugs_centralized	slugs_centralized	shields/momentum_shield	0.05
IndivQLearningParticleDNNOnlyOneHotMoreSeeds2/211_5_11	none		True	-10	False	ParticleMomentum	False	False	10	-30	Individual_Deep_Q	1.0	simple_mlp	True	0.05	2500000	21	True	IndivQLearningParticleDNNOnlyOneHotMoreSeeds2/211_5_11_slugs_decentralized	slugs_decentralized	shields/momentum_shield	0.05
IndivQLearningParticleDNNOnlyOneHotMoreSeeds2/211_5_11	none		True	-10	False	ParticleMomentum	False	False	10	-30	Individual_Deep_Q	1.0	simple_mlp	True	0.05	2500000	21	True	IndivQLearningParticleDNNOnlyOneHotMoreSeeds2/211_5_11_none	none		0.05
IndivQLearningParticleDNNOnlyOneHotMoreSeeds2/212_5_12	none		True	-10	False	ParticleMomentum	False	False	10	-30	Individual_Deep_Q	1.0	simple_mlp	True	0.05	2500000	22	True	IndivQLearningParticleDNNOnlyOneHotMoreSeeds2/212_5_12_slugs_centralized	slugs_centralized	shields/momentum_shield	0.05
IndivQLearningParticleDNNOnlyOneHotMoreSeeds2/212_5_12	none		True	-10	False	ParticleMomentum	False	False	10	-30	Individual_Deep_Q	1.0	simple_mlp	True	0.05	2500000	22	True	IndivQLearningParticleDNNOnlyOneHotMoreSeeds2/212_5_12_slugs_decentralized	slugs_decentralized	shields/momentum_shield	0.05
IndivQLearningParticleDNNOnlyOneHotMoreSeeds2/212_5_12	none		True	-10	False	ParticleMomentum	False	False	10	-30	Individual_Deep_Q	1.0	simple_mlp	True	0.05	2500000	22	True	IndivQLearningParticleDNNOnlyOneHotMoreSeeds2/212_5_12_none	none		0.05
IndivQLearningParticleDNNOnlyOneHotMoreSeeds2/213_5_13	none		True	-10	False	ParticleMomentum	False	False	10	-30	Individual_Deep_Q	1.0	simple_mlp	True	0.05	2500000	23	True	IndivQLearningParticleDNNOnlyOneHotMoreSeeds2/213_5_13_slugs_centralized	slugs_centralized	shields/momentum_shield	0.05
IndivQLearningParticleDNNOnlyOneHotMoreSeeds2/213_5_13	none		True	-10	False	ParticleMomentum	False	False	10	-30	Individual_Deep_Q	1.0	simple_mlp	True	0.05	2500000	23	True	IndivQLearningParticleDNNOnlyOneHotMoreSeeds2/213_5_13_slugs_decentralized	slugs_decentralized	shields/momentum_shield	0.05
IndivQLearningParticleDNNOnlyOneHotMoreSeeds2/213_5_13	none		True	-10	False	ParticleMomentum	False	False	10	-30	Individual_Deep_Q	1.0	simple_mlp	True	0.05	2500000	23	True	IndivQLearningParticleDNNOnlyOneHotMoreSeeds2/213_5_13_none	none		0.05
IndivQLearningParticleDNNOnlyOneHotMoreSeeds2/214_5_14	none		True	-10	False	ParticleMomentum	False	False	10	-30	Individual_Deep_Q	1.0	simple_mlp	True	0.05	2500000	24	True	IndivQLearningParticleDNNOnlyOneHotMoreSeeds2/214_5_14_slugs_centralized	slugs_centralized	shields/momentum_shield	0.05
IndivQLearningParticleDNNOnlyOneHotMoreSeeds2/214_5_14	none		True	-10	False	ParticleMomentum	False	False	10	-30	Individual_Deep_Q	1.0	simple_mlp	True	0.05	2500000	24	True	IndivQLearningParticleDNNOnlyOneHotMoreSeeds2/214_5_14_slugs_decentralized	slugs_decentralized	shields/momentum_shield	0.05
IndivQLearningParticleDNNOnlyOneHotMoreSeeds2/214_5_14	none		True	-10	False	ParticleMomentum	False	False	10	-30	Individual_Deep_Q	1.0	simple_mlp	True	0.05	2500000	24	True	IndivQLearningParticleDNNOnlyOneHotMoreSeeds2/214_5_14_none	none		0.05
IndivQLearningParticleDNNOnlyOneHotMoreSeeds2/215_5_15	none		True	-10	False	ParticleMomentum	False	False	10	-30	Individual_Deep_Q	1.0	simple_mlp	True	0.05	2500000	25	True	IndivQLearningParticleDNNOnlyOneHotMoreSeeds2/215_5_15_slugs_centralized	slugs_centralized	shields/momentum_shield	0.05
IndivQLearningParticleDNNOnlyOneHotMoreSeeds2/215_5_15	none		True	-10	False	ParticleMomentum	False	False	10	-30	Individual_Deep_Q	1.0	simple_mlp	True	0.05	2500000	25	True	IndivQLearningParticleDNNOnlyOneHotMoreSeeds2/215_5_15_slugs_decentralized	slugs_decentralized	shields/momentum_shield	0.05
IndivQLearningParticleDNNOnlyOneHotMoreSeeds2/215_5_15	none		True	-10	False	ParticleMomentum	False	False	10	-30	Individual_Deep_Q	1.0	simple_mlp	True	0.05	2500000	25	True	IndivQLearningParticleDNNOnlyOneHotMoreSeeds2/215_5_15_none	none		0.05
IndivQLearningParticleDNNOnlyOneHotMoreSeeds2/216_5_16	none		True	-10	False	ParticleMomentum	False	False	10	-30	Individual_Deep_Q	1.0	simple_mlp	True	0.05	2500000	26	True	IndivQLearningParticleDNNOnlyOneHotMoreSeeds2/216_5_16_slugs_centralized	slugs_centralized	shields/momentum_shield	0.05
IndivQLearningParticleDNNOnlyOneHotMoreSeeds2/216_5_16	none		True	-10	False	ParticleMomentum	False	False	10	-30	Individual_Deep_Q	1.0	simple_mlp	True	0.05	2500000	26	True	IndivQLearningParticleDNNOnlyOneHotMoreSeeds2/216_5_16_slugs_decentralized	slugs_decentralized	shields/momentum_shield	0.05
IndivQLearningParticleDNNOnlyOneHotMoreSeeds2/216_5_16	none		True	-10	False	ParticleMomentum	False	False	10	-30	Individual_Deep_Q	1.0	simple_mlp	True	0.05	2500000	26	True	IndivQLearningParticleDNNOnlyOneHotMoreSeeds2/216_5_16_none	none		0.05
IndivQLearningParticleDNNOnlyOneHotMoreSeeds2/217_5_17	none		True	-10	False	ParticleMomentum	False	False	10	-30	Individual_Deep_Q	1.0	simple_mlp	True	0.05	2500000	27	True	IndivQLearningParticleDNNOnlyOneHotMoreSeeds2/217_5_17_slugs_centralized	slugs_centralized	shields/momentum_shield	0.05
IndivQLearningParticleDNNOnlyOneHotMoreSeeds2/217_5_17	none		True	-10	False	ParticleMomentum	False	False	10	-30	Individual_Deep_Q	1.0	simple_mlp	True	0.05	2500000	27	True	IndivQLearningParticleDNNOnlyOneHotMoreSeeds2/217_5_17_slugs_decentralized	slugs_decentralized	shields/momentum_shield	0.05
IndivQLearningParticleDNNOnlyOneHotMoreSeeds2/217_5_17	none		True	-10	False	ParticleMomentum	False	False	10	-30	Individual_Deep_Q	1.0	simple_mlp	True	0.05	2500000	27	True	IndivQLearningParticleDNNOnlyOneHotMoreSeeds2/217_5_17_none	none		0.05
IndivQLearningParticleDNNOnlyOneHotMoreSeeds2/218_5_18	none		True	-10	False	ParticleMomentum	False	False	10	-30	Individual_Deep_Q	1.0	simple_mlp	True	0.05	2500000	28	True	IndivQLearningParticleDNNOnlyOneHotMoreSeeds2/218_5_18_slugs_centralized	slugs_centralized	shields/momentum_shield	0.05
IndivQLearningParticleDNNOnlyOneHotMoreSeeds2/218_5_18	none		True	-10	False	ParticleMomentum	False	False	10	-30	Individual_Deep_Q	1.0	simple_mlp	True	0.05	2500000	28	True	IndivQLearningParticleDNNOnlyOneHotMoreSeeds2/218_5_18_slugs_decentralized	slugs_decentralized	shields/momentum_shield	0.05
IndivQLearningParticleDNNOnlyOneHotMoreSeeds2/218_5_18	none		True	-10	False	ParticleMomentum	False	False	10	-30	Individual_Deep_Q	1.0	simple_mlp	True	0.05	2500000	28	True	IndivQLearningParticleDNNOnlyOneHotMoreSeeds2/218_5_18_none	none		0.05
IndivQLearningParticleDNNOnlyOneHotMoreSeeds2/219_5_19	none		True	-10	False	ParticleMomentum	False	False	10	-30	Individual_Deep_Q	1.0	simple_mlp	True	0.05	2500000	29	True	IndivQLearningParticleDNNOnlyOneHotMoreSeeds2/219_5_19_slugs_centralized	slugs_centralized	shields/momentum_shield	0.05
IndivQLearningParticleDNNOnlyOneHotMoreSeeds2/219_5_19	none		True	-10	False	ParticleMomentum	False	False	10	-30	Individual_Deep_Q	1.0	simple_mlp	True	0.05	2500000	29	True	IndivQLearningParticleDNNOnlyOneHotMoreSeeds2/219_5_19_slugs_decentralized	slugs_decentralized	shields/momentum_shield	0.05
IndivQLearningParticleDNNOnlyOneHotMoreSeeds2/219_5_19	none		True	-10	False	ParticleMomentum	False	False	10	-30	Individual_Deep_Q	1.0	simple_mlp	True	0.05	2500000	29	True	IndivQLearningParticleDNNOnlyOneHotMoreSeeds2/219_5_19_none	none		0.05
IndivQLearningParticleDNNOnlyOneHotMoreSeeds2/220_5_20	none		True	-10	False	ParticleMomentum	False	False	10	-30	Individual_Deep_Q	1.0	simple_mlp	True	0.05	2500000	30	True	IndivQLearningParticleDNNOnlyOneHotMoreSeeds2/220_5_20_slugs_centralized	slugs_centralized	shields/momentum_shield	0.05
IndivQLearningParticleDNNOnlyOneHotMoreSeeds2/220_5_20	none		True	-10	False	ParticleMomentum	False	False	10	-30	Individual_Deep_Q	1.0	simple_mlp	True	0.05	2500000	30	True	IndivQLearningParticleDNNOnlyOneHotMoreSeeds2/220_5_20_slugs_decentralized	slugs_decentralized	shields/momentum_shield	0.05
IndivQLearningParticleDNNOnlyOneHotMoreSeeds2/220_5_20	none		True	-10	False	ParticleMomentum	False	False	10	-30	Individual_Deep_Q	1.0	simple_mlp	True	0.05	2500000	30	True	IndivQLearningParticleDNNOnlyOneHotMoreSeeds2/220_5_20_none	none		0.05
IndivQLearningParticleDNNOnlyOneHotMoreSeeds2/221_5_21	none		True	-10	False	ParticleMomentum	False	False	10	-30	Individual_Deep_Q	1.0	simple_mlp	True	0.05	2500000	31	True	IndivQLearningParticleDNNOnlyOneHotMoreSeeds2/221_5_21_slugs_centralized	slugs_centralized	shields/momentum_shield	0.05
IndivQLearningParticleDNNOnlyOneHotMoreSeeds2/221_5_21	none		True	-10	False	ParticleMomentum	False	False	10	-30	Individual_Deep_Q	1.0	simple_mlp	True	0.05	2500000	31	True	IndivQLearningParticleDNNOnlyOneHotMoreSeeds2/221_5_21_slugs_decentralized	slugs_decentralized	shields/momentum_shield	0.05
IndivQLearningParticleDNNOnlyOneHotMoreSeeds2/221_5_21	none		True	-10	False	ParticleMomentum	False	False	10	-30	Individual_Deep_Q	1.0	simple_mlp	True	0.05	2500000	31	True	IndivQLearningParticleDNNOnlyOneHotMoreSeeds2/221_5_21_none	none		0.05
IndivQLearningParticleDNNOnlyOneHotMoreSeeds2/222_5_22	none		True	-10	False	ParticleMomentum	False	False	10	-30	Individual_Deep_Q	1.0	simple_mlp	True	0.05	2500000	32	True	IndivQLearningParticleDNNOnlyOneHotMoreSeeds2/222_5_22_slugs_centralized	slugs_centralized	shields/momentum_shield	0.05
IndivQLearningParticleDNNOnlyOneHotMoreSeeds2/222_5_22	none		True	-10	False	ParticleMomentum	False	False	10	-30	Individual_Deep_Q	1.0	simple_mlp	True	0.05	2500000	32	True	IndivQLearningParticleDNNOnlyOneHotMoreSeeds2/222_5_22_slugs_decentralized	slugs_decentralized	shields/momentum_shield	0.05
IndivQLearningParticleDNNOnlyOneHotMoreSeeds2/222_5_22	none		True	-10	False	ParticleMomentum	False	False	10	-30	Individual_Deep_Q	1.0	simple_mlp	True	0.05	2500000	32	True	IndivQLearningParticleDNNOnlyOneHotMoreSeeds2/222_5_22_none	none		0.05
IndivQLearningParticleDNNOnlyOneHotMoreSeeds2/223_5_23	none		True	-10	False	ParticleMomentum	False	False	10	-30	Individual_Deep_Q	1.0	simple_mlp	True	0.05	2500000	33	True	IndivQLearningParticleDNNOnlyOneHotMoreSeeds2/223_5_23_slugs_centralized	slugs_centralized	shields/momentum_shield	0.05
IndivQLearningParticleDNNOnlyOneHotMoreSeeds2/223_5_23	none		True	-10	False	ParticleMomentum	False	False	10	-30	Individual_Deep_Q	1.0	simple_mlp	True	0.05	2500000	33	True	IndivQLearningParticleDNNOnlyOneHotMoreSeeds2/223_5_23_slugs_decentralized	slugs_decentralized	shields/momentum_shield	0.05
IndivQLearningParticleDNNOnlyOneHotMoreSeeds2/223_5_23	none		True	-10	False	ParticleMomentum	False	False	10	-30	Individual_Deep_Q	1.0	simple_mlp	True	0.05	2500000	33	True	IndivQLearningParticleDNNOnlyOneHotMoreSeeds2/223_5_23_none	none		0.05
IndivQLearningParticleDNNOnlyOneHotMoreSeeds2/224_5_24	none		True	-10	False	ParticleMomentum	False	False	10	-30	Individual_Deep_Q	1.0	simple_mlp	True	0.05	2500000	34	True	IndivQLearningParticleDNNOnlyOneHotMoreSeeds2/224_5_24_slugs_centralized	slugs_centralized	shields/momentum_shield	0.05
IndivQLearningParticleDNNOnlyOneHotMoreSeeds2/224_5_24	none		True	-10	False	ParticleMomentum	False	False	10	-30	Individual_Deep_Q	1.0	simple_mlp	True	0.05	2500000	34	True	IndivQLearningParticleDNNOnlyOneHotMoreSeeds2/224_5_24_slugs_decentralized	slugs_decentralized	shields/momentum_shield	0.05
IndivQLearningParticleDNNOnlyOneHotMoreSeeds2/224_5_24	none		True	-10	False	ParticleMomentum	False	False	10	-30	Individual_Deep_Q	1.0	simple_mlp	True	0.05	2500000	34	True	IndivQLearningParticleDNNOnlyOneHotMoreSeeds2/224_5_24_none	none		0.05
IndivQLearningParticleDNNOnlyOneHotMoreSeeds2/225_5_25	none		True	-10	False	ParticleMomentum	False	False	10	-30	Individual_Deep_Q	1.0	simple_mlp	True	0.05	2500000	35	True	IndivQLearningParticleDNNOnlyOneHotMoreSeeds2/225_5_25_slugs_centralized	slugs_centralized	shields/momentum_shield	0.05
IndivQLearningParticleDNNOnlyOneHotMoreSeeds2/225_5_25	none		True	-10	False	ParticleMomentum	False	False	10	-30	Individual_Deep_Q	1.0	simple_mlp	True	0.05	2500000	35	True	IndivQLearningParticleDNNOnlyOneHotMoreSeeds2/225_5_25_slugs_decentralized	slugs_decentralized	shields/momentum_shield	0.05
IndivQLearningParticleDNNOnlyOneHotMoreSeeds2/225_5_25	none		True	-10	False	ParticleMomentum	False	False	10	-30	Individual_Deep_Q	1.0	simple_mlp	True	0.05	2500000	35	True	IndivQLearningParticleDNNOnlyOneHotMoreSeeds2/225_5_25_none	none		0.05
IndivQLearningParticleDNNOnlyOneHotMoreSeeds2/226_5_26	none		True	-10	False	ParticleMomentum	False	False	10	-30	Individual_Deep_Q	1.0	simple_mlp	True	0.05	2500000	36	True	IndivQLearningParticleDNNOnlyOneHotMoreSeeds2/226_5_26_slugs_centralized	slugs_centralized	shields/momentum_shield	0.05
IndivQLearningParticleDNNOnlyOneHotMoreSeeds2/226_5_26	none		True	-10	False	ParticleMomentum	False	False	10	-30	Individual_Deep_Q	1.0	simple_mlp	True	0.05	2500000	36	True	IndivQLearningParticleDNNOnlyOneHotMoreSeeds2/226_5_26_slugs_decentralized	slugs_decentralized	shields/momentum_shield	0.05
IndivQLearningParticleDNNOnlyOneHotMoreSeeds2/226_5_26	none		True	-10	False	ParticleMomentum	False	False	10	-30	Individual_Deep_Q	1.0	simple_mlp	True	0.05	2500000	36	True	IndivQLearningParticleDNNOnlyOneHotMoreSeeds2/226_5_26_none	none		0.05
IndivQLearningParticleDNNOnlyOneHotMoreSeeds2/227_5_27	none		True	-10	False	ParticleMomentum	False	False	10	-30	Individual_Deep_Q	1.0	simple_mlp	True	0.05	2500000	37	True	IndivQLearningParticleDNNOnlyOneHotMoreSeeds2/227_5_27_slugs_centralized	slugs_centralized	shields/momentum_shield	0.05
IndivQLearningParticleDNNOnlyOneHotMoreSeeds2/227_5_27	none		True	-10	False	ParticleMomentum	False	False	10	-30	Individual_Deep_Q	1.0	simple_mlp	True	0.05	2500000	37	True	IndivQLearningParticleDNNOnlyOneHotMoreSeeds2/227_5_27_slugs_decentralized	slugs_decentralized	shields/momentum_shield	0.05
IndivQLearningParticleDNNOnlyOneHotMoreSeeds2/227_5_27	none		True	-10	False	ParticleMomentum	False	False	10	-30	Individual_Deep_Q	1.0	simple_mlp	True	0.05	2500000	37	True	IndivQLearningParticleDNNOnlyOneHotMoreSeeds2/227_5_27_none	none		0.05
IndivQLearningParticleDNNOnlyOneHotMoreSeeds2/228_5_28	none		True	-10	False	ParticleMomentum	False	False	10	-30	Individual_Deep_Q	1.0	simple_mlp	True	0.05	2500000	38	True	IndivQLearningParticleDNNOnlyOneHotMoreSeeds2/228_5_28_slugs_centralized	slugs_centralized	shields/momentum_shield	0.05
IndivQLearningParticleDNNOnlyOneHotMoreSeeds2/228_5_28	none		True	-10	False	ParticleMomentum	False	False	10	-30	Individual_Deep_Q	1.0	simple_mlp	True	0.05	2500000	38	True	IndivQLearningParticleDNNOnlyOneHotMoreSeeds2/228_5_28_slugs_decentralized	slugs_decentralized	shields/momentum_shield	0.05
IndivQLearningParticleDNNOnlyOneHotMoreSeeds2/228_5_28	none		True	-10	False	ParticleMomentum	False	False	10	-30	Individual_Deep_Q	1.0	simple_mlp	True	0.05	2500000	38	True	IndivQLearningParticleDNNOnlyOneHotMoreSeeds2/228_5_28_none	none		0.05
IndivQLearningParticleDNNOnlyOneHotMoreSeeds2/229_5_29	none		True	-10	False	ParticleMomentum	False	False	10	-30	Individual_Deep_Q	1.0	simple_mlp	True	0.05	2500000	39	True	IndivQLearningParticleDNNOnlyOneHotMoreSeeds2/229_5_29_slugs_centralized	slugs_centralized	shields/momentum_shield	0.05
IndivQLearningParticleDNNOnlyOneHotMoreSeeds2/229_5_29	none		True	-10	False	ParticleMomentum	False	False	10	-30	Individual_Deep_Q	1.0	simple_mlp	True	0.05	2500000	39	True	IndivQLearningParticleDNNOnlyOneHotMoreSeeds2/229_5_29_slugs_decentralized	slugs_decentralized	shields/momentum_shield	0.05
IndivQLearningParticleDNNOnlyOneHotMoreSeeds2/229_5_29	none		True	-10	False	ParticleMomentum	False	False	10	-30	Individual_Deep_Q	1.0	simple_mlp	True	0.05	2500000	39	True	IndivQLearningParticleDNNOnlyOneHotMoreSeeds2/229_5_29_none	none		0.05
IndivQLearningParticleDNNOnlyOneHotMoreSeeds2/230_5_30	none		True	-10	False	ParticleMomentum	False	False	10	-30	Individual_Deep_Q	1.0	simple_mlp	True	0.05	2500000	40	True	IndivQLearningParticleDNNOnlyOneHotMoreSeeds2/230_5_30_slugs_centralized	slugs_centralized	shields/momentum_shield	0.05
IndivQLearningParticleDNNOnlyOneHotMoreSeeds2/230_5_30	none		True	-10	False	ParticleMomentum	False	False	10	-30	Individual_Deep_Q	1.0	simple_mlp	True	0.05	2500000	40	True	IndivQLearningParticleDNNOnlyOneHotMoreSeeds2/230_5_30_slugs_decentralized	slugs_decentralized	shields/momentum_shield	0.05
IndivQLearningParticleDNNOnlyOneHotMoreSeeds2/230_5_30	none		True	-10	False	ParticleMomentum	False	False	10	-30	Individual_Deep_Q	1.0	simple_mlp	True	0.05	2500000	40	True	IndivQLearningParticleDNNOnlyOneHotMoreSeeds2/230_5_30_none	none		0.05
IndivQLearningParticleDNNOnlyOneHotMoreSeeds2/231_5_31	none		True	-10	False	ParticleMomentum	False	False	10	-30	Individual_Deep_Q	1.0	simple_mlp	True	0.05	2500000	41	True	IndivQLearningParticleDNNOnlyOneHotMoreSeeds2/231_5_31_slugs_centralized	slugs_centralized	shields/momentum_shield	0.05
IndivQLearningParticleDNNOnlyOneHotMoreSeeds2/231_5_31	none		True	-10	False	ParticleMomentum	False	False	10	-30	Individual_Deep_Q	1.0	simple_mlp	True	0.05	2500000	41	True	IndivQLearningParticleDNNOnlyOneHotMoreSeeds2/231_5_31_slugs_decentralized	slugs_decentralized	shields/momentum_shield	0.05
IndivQLearningParticleDNNOnlyOneHotMoreSeeds2/231_5_31	none		True	-10	False	ParticleMomentum	False	False	10	-30	Individual_Deep_Q	1.0	simple_mlp	True	0.05	2500000	41	True	IndivQLearningParticleDNNOnlyOneHotMoreSeeds2/231_5_31_none	none		0.05
IndivQLearningParticleDNNOnlyOneHotMoreSeeds2/232_5_32	none		True	-10	False	ParticleMomentum	False	False	10	-30	Individual_Deep_Q	1.0	simple_mlp	True	0.05	2500000	42	True	IndivQLearningParticleDNNOnlyOneHotMoreSeeds2/232_5_32_slugs_centralized	slugs_centralized	shields/momentum_shield	0.05
IndivQLearningParticleDNNOnlyOneHotMoreSeeds2/232_5_32	none		True	-10	False	ParticleMomentum	False	False	10	-30	Individual_Deep_Q	1.0	simple_mlp	True	0.05	2500000	42	True	IndivQLearningParticleDNNOnlyOneHotMoreSeeds2/232_5_32_slugs_decentralized	slugs_decentralized	shields/momentum_shield	0.05
IndivQLearningParticleDNNOnlyOneHotMoreSeeds2/232_5_32	none		True	-10	False	ParticleMomentum	False	False	10	-30	Individual_Deep_Q	1.0	simple_mlp	True	0.05	2500000	42	True	IndivQLearningParticleDNNOnlyOneHotMoreSeeds2/232_5_32_none	none		0.05
IndivQLearningParticleDNNOnlyOneHotMoreSeeds2/233_5_33	none		True	-10	False	ParticleMomentum	False	False	10	-30	Individual_Deep_Q	1.0	simple_mlp	True	0.05	2500000	43	True	IndivQLearningParticleDNNOnlyOneHotMoreSeeds2/233_5_33_slugs_centralized	slugs_centralized	shields/momentum_shield	0.05
IndivQLearningParticleDNNOnlyOneHotMoreSeeds2/233_5_33	none		True	-10	False	ParticleMomentum	False	False	10	-30	Individual_Deep_Q	1.0	simple_mlp	True	0.05	2500000	43	True	IndivQLearningParticleDNNOnlyOneHotMoreSeeds2/233_5_33_slugs_decentralized	slugs_decentralized	shields/momentum_shield	0.05
IndivQLearningParticleDNNOnlyOneHotMoreSeeds2/233_5_33	none		True	-10	False	ParticleMomentum	False	False	10	-30	Individual_Deep_Q	1.0	simple_mlp	True	0.05	2500000	43	True	IndivQLearningParticleDNNOnlyOneHotMoreSeeds2/233_5_33_none	none		0.05
IndivQLearningParticleDNNOnlyOneHotMoreSeeds2/234_5_34	none		True	-10	False	ParticleMomentum	False	False	10	-30	Individual_Deep_Q	1.0	simple_mlp	True	0.05	2500000	44	True	IndivQLearningParticleDNNOnlyOneHotMoreSeeds2/234_5_34_slugs_centralized	slugs_centralized	shields/momentum_shield	0.05
IndivQLearningParticleDNNOnlyOneHotMoreSeeds2/234_5_34	none		True	-10	False	ParticleMomentum	False	False	10	-30	Individual_Deep_Q	1.0	simple_mlp	True	0.05	2500000	44	True	IndivQLearningParticleDNNOnlyOneHotMoreSeeds2/234_5_34_slugs_decentralized	slugs_decentralized	shields/momentum_shield	0.05
IndivQLearningParticleDNNOnlyOneHotMoreSeeds2/234_5_34	none		True	-10	False	ParticleMomentum	False	False	10	-30	Individual_Deep_Q	1.0	simple_mlp	True	0.05	2500000	44	True	IndivQLearningParticleDNNOnlyOneHotMoreSeeds2/234_5_34_none	none		0.05
IndivQLearningParticleDNNOnlyOneHotMoreSeeds2/235_5_35	none		True	-10	False	ParticleMomentum	False	False	10	-30	Individual_Deep_Q	1.0	simple_mlp	True	0.05	2500000	45	True	IndivQLearningParticleDNNOnlyOneHotMoreSeeds2/235_5_35_slugs_centralized	slugs_centralized	shields/momentum_shield	0.05
IndivQLearningParticleDNNOnlyOneHotMoreSeeds2/235_5_35	none		True	-10	False	ParticleMomentum	False	False	10	-30	Individual_Deep_Q	1.0	simple_mlp	True	0.05	2500000	45	True	IndivQLearningParticleDNNOnlyOneHotMoreSeeds2/235_5_35_slugs_decentralized	slugs_decentralized	shields/momentum_shield	0.05
IndivQLearningParticleDNNOnlyOneHotMoreSeeds2/235_5_35	none		True	-10	False	ParticleMomentum	False	False	10	-30	Individual_Deep_Q	1.0	simple_mlp	True	0.05	2500000	45	True	IndivQLearningParticleDNNOnlyOneHotMoreSeeds2/235_5_35_none	none		0.05
IndivQLearningParticleDNNOnlyOneHotMoreSeeds2/236_5_36	none		True	-10	False	ParticleMomentum	False	False	10	-30	Individual_Deep_Q	1.0	simple_mlp	True	0.05	2500000	46	True	IndivQLearningParticleDNNOnlyOneHotMoreSeeds2/236_5_36_slugs_centralized	slugs_centralized	shields/momentum_shield	0.05
IndivQLearningParticleDNNOnlyOneHotMoreSeeds2/236_5_36	none		True	-10	False	ParticleMomentum	False	False	10	-30	Individual_Deep_Q	1.0	simple_mlp	True	0.05	2500000	46	True	IndivQLearningParticleDNNOnlyOneHotMoreSeeds2/236_5_36_slugs_decentralized	slugs_decentralized	shields/momentum_shield	0.05
IndivQLearningParticleDNNOnlyOneHotMoreSeeds2/236_5_36	none		True	-10	False	ParticleMomentum	False	False	10	-30	Individual_Deep_Q	1.0	simple_mlp	True	0.05	2500000	46	True	IndivQLearningParticleDNNOnlyOneHotMoreSeeds2/236_5_36_none	none		0.05
IndivQLearningParticleDNNOnlyOneHotMoreSeeds2/237_5_37	none		True	-10	False	ParticleMomentum	False	False	10	-30	Individual_Deep_Q	1.0	simple_mlp	True	0.05	2500000	47	True	IndivQLearningParticleDNNOnlyOneHotMoreSeeds2/237_5_37_slugs_centralized	slugs_centralized	shields/momentum_shield	0.05
IndivQLearningParticleDNNOnlyOneHotMoreSeeds2/237_5_37	none		True	-10	False	ParticleMomentum	False	False	10	-30	Individual_Deep_Q	1.0	simple_mlp	True	0.05	2500000	47	True	IndivQLearningParticleDNNOnlyOneHotMoreSeeds2/237_5_37_slugs_decentralized	slugs_decentralized	shields/momentum_shield	0.05
IndivQLearningParticleDNNOnlyOneHotMoreSeeds2/237_5_37	none		True	-10	False	ParticleMomentum	False	False	10	-30	Individual_Deep_Q	1.0	simple_mlp	True	0.05	2500000	47	True	IndivQLearningParticleDNNOnlyOneHotMoreSeeds2/237_5_37_none	none		0.05
IndivQLearningParticleDNNOnlyOneHotMoreSeeds2/238_5_38	none		True	-10	False	ParticleMomentum	False	False	10	-30	Individual_Deep_Q	1.0	simple_mlp	True	0.05	2500000	48	True	IndivQLearningParticleDNNOnlyOneHotMoreSeeds2/238_5_38_slugs_centralized	slugs_centralized	shields/momentum_shield	0.05
IndivQLearningParticleDNNOnlyOneHotMoreSeeds2/238_5_38	none		True	-10	False	ParticleMomentum	False	False	10	-30	Individual_Deep_Q	1.0	simple_mlp	True	0.05	2500000	48	True	IndivQLearningParticleDNNOnlyOneHotMoreSeeds2/238_5_38_slugs_decentralized	slugs_decentralized	shields/momentum_shield	0.05
IndivQLearningParticleDNNOnlyOneHotMoreSeeds2/238_5_38	none		True	-10	False	ParticleMomentum	False	False	10	-30	Individual_Deep_Q	1.0	simple_mlp	True	0.05	2500000	48	True	IndivQLearningParticleDNNOnlyOneHotMoreSeeds2/238_5_38_none	none		0.05
IndivQLearningParticleDNNOnlyOneHotMoreSeeds2/239_5_39	none		True	-10	False	ParticleMomentum	False	False	10	-30	Individual_Deep_Q	1.0	simple_mlp	True	0.05	2500000	49	True	IndivQLearningParticleDNNOnlyOneHotMoreSeeds2/239_5_39_slugs_centralized	slugs_centralized	shields/momentum_shield	0.05
IndivQLearningParticleDNNOnlyOneHotMoreSeeds2/239_5_39	none		True	-10	False	ParticleMomentum	False	False	10	-30	Individual_Deep_Q	1.0	simple_mlp	True	0.05	2500000	49	True	IndivQLearningParticleDNNOnlyOneHotMoreSeeds2/239_5_39_slugs_decentralized	slugs_decentralized	shields/momentum_shield	0.05
IndivQLearningParticleDNNOnlyOneHotMoreSeeds2/239_5_39	none		True	-10	False	ParticleMomentum	False	False	10	-30	Individual_Deep_Q	1.0	simple_mlp	True	0.05	2500000	49	True	IndivQLearningParticleDNNOnlyOneHotMoreSeeds2/239_5_39_none	none		0.05
