# Supplementary material
Source: ML conference proceedings conference paper supplement (https://proceedings.neurips.cc/paper_files/paper/2022/hash/57444e14ecd9e2c8f603b4f012ce3811-Abstract.html)
Supplement: Supplementary file 1 [file 57444e14ecd9e2c8f603b4f012ce3811-Supplemental-Conference.zip › 3410_shield_decentralization_for_sa-Supplementary Material/parallel_configs/IndivQLearningParticleDNNOnlyOneHotMoreSeeds2Train.csv]

run_name	shield	shield_specification	punish_unsafe_orig_action	punish_unsafe_orig_action_modifier	randomize_starts	map_type	particle_agents_observe_momentum	particle_terminate_on_collision	particle_world_size	particle_collision_penalty	learner_type	learner_anneal_eps_start	learner_deep_network_model	learner_transform_one_hot	learner_anneal_eps_finish	max_total_steps	seed	skip_evaluation
IndivQLearningParticleDNNOnlyOneHotMoreSeeds2/0_0_0	slugs_centralized	shields/momentum_shield	True	-10	True	ParticleMomentum	False	False	10	-30	Individual_Deep_Q	1.0	simple_mlp	True	0.05	2500000	10	True
IndivQLearningParticleDNNOnlyOneHotMoreSeeds2/1_0_1	slugs_centralized	shields/momentum_shield	True	-10	True	ParticleMomentum	False	False	10	-30	Individual_Deep_Q	1.0	simple_mlp	True	0.05	2500000	11	True
IndivQLearningParticleDNNOnlyOneHotMoreSeeds2/2_0_2	slugs_centralized	shields/momentum_shield	True	-10	True	ParticleMomentum	False	False	10	-30	Individual_Deep_Q	1.0	simple_mlp	True	0.05	2500000	12	True
IndivQLearningParticleDNNOnlyOneHotMoreSeeds2/3_0_3	slugs_centralized	shields/momentum_shield	True	-10	True	ParticleMomentum	False	False	10	-30	Individual_Deep_Q	1.0	simple_mlp	True	0.05	2500000	13	True
IndivQLearningParticleDNNOnlyOneHotMoreSeeds2/4_0_4	slugs_centralized	shields/momentum_shield	True	-10	True	ParticleMomentum	False	False	10	-30	Individual_Deep_Q	1.0	simple_mlp	True	0.05	2500000	14	True
IndivQLearningParticleDNNOnlyOneHotMoreSeeds2/5_0_5	slugs_centralized	shields/momentum_shield	True	-10	True	ParticleMomentum	False	False	10	-30	Individual_Deep_Q	1.0	simple_mlp	True	0.05	2500000	15	True
IndivQLearningParticleDNNOnlyOneHotMoreSeeds2/6_0_6	slugs_centralized	shields/momentum_shield	True	-10	True	ParticleMomentum	False	False	10	-30	Individual_Deep_Q	1.0	simple_mlp	True	0.05	2500000	16	True
IndivQLearningParticleDNNOnlyOneHotMoreSeeds2/7_0_7	slugs_centralized	shields/momentum_shield	True	-10	True	ParticleMomentum	False	False	10	-30	Individual_Deep_Q	1.0	simple_mlp	True	0.05	2500000	17	True
IndivQLearningParticleDNNOnlyOneHotMoreSeeds2/8_0_8	slugs_centralized	shields/momentum_shield	True	-10	True	ParticleMomentum	False	False	10	-30	Individual_Deep_Q	1.0	simple_mlp	True	0.05	2500000	18	True
IndivQLearningParticleDNNOnlyOneHotMoreSeeds2/9_0_9	slugs_centralized	shields/momentum_shield	True	-10	True	ParticleMomentum	False	False	10	-30	Individual_Deep_Q	1.0	simple_mlp	True	0.05	2500000	19	True
IndivQLearningParticleDNNOnlyOneHotMoreSeeds2/10_0_10	slugs_centralized	shields/momentum_shield	True	-10	True	ParticleMomentum	False	False	10	-30	Individual_Deep_Q	1.0	simple_mlp	True	0.05	2500000	20	True
IndivQLearningParticleDNNOnlyOneHotMoreSeeds2/11_0_11	slugs_centralized	shields/momentum_shield	True	-10	True	ParticleMomentum	False	False	10	-30	Individual_Deep_Q	1.0	simple_mlp	True	0.05	2500000	21	True
IndivQLearningParticleDNNOnlyOneHotMoreSeeds2/12_0_12	slugs_centralized	shields/momentum_shield	True	-10	True	ParticleMomentum	False	False	10	-30	Individual_Deep_Q	1.0	simple_mlp	True	0.05	2500000	22	True
IndivQLearningParticleDNNOnlyOneHotMoreSeeds2/13_0_13	slugs_centralized	shields/momentum_shield	True	-10	True	ParticleMomentum	False	False	10	-30	Individual_Deep_Q	1.0	simple_mlp	True	0.05	2500000	23	True
IndivQLearningParticleDNNOnlyOneHotMoreSeeds2/14_0_14	slugs_centralized	shields/momentum_shield	True	-10	True	ParticleMomentum	False	False	10	-30	Individual_Deep_Q	1.0	simple_mlp	True	0.05	2500000	24	True
IndivQLearningParticleDNNOnlyOneHotMoreSeeds2/15_0_15	slugs_centralized	shields/momentum_shield	True	-10	True	ParticleMomentum	False	False	10	-30	Individual_Deep_Q	1.0	simple_mlp	True	0.05	2500000	25	True
IndivQLearningParticleDNNOnlyOneHotMoreSeeds2/16_0_16	slugs_centralized	shields/momentum_shield	True	-10	True	ParticleMomentum	False	False	10	-30	Individual_Deep_Q	1.0	simple_mlp	True	0.05	2500000	26	True
IndivQLearningParticleDNNOnlyOneHotMoreSeeds2/17_0_17	slugs_centralized	shields/momentum_shield	True	-10	True	ParticleMomentum	False	False	10	-30	Individual_Deep_Q	1.0	simple_mlp	True	0.05	2500000	27	True
IndivQLearningParticleDNNOnlyOneHotMoreSeeds2/18_0_18	slugs_centralized	shields/momentum_shield	True	-10	True	ParticleMomentum	False	False	10	-30	Individual_Deep_Q	1.0	simple_mlp	True	0.05	2500000	28	True
IndivQLearningParticleDNNOnlyOneHotMoreSeeds2/19_0_19	slugs_centralized	shields/momentum_shield	True	-10	True	ParticleMomentum	False	False	10	-30	Individual_Deep_Q	1.0	simple_mlp	True	0.05	2500000	29	True
IndivQLearningParticleDNNOnlyOneHotMoreSeeds2/20_0_20	slugs_centralized	shields/momentum_shield	True	-10	True	ParticleMomentum	False	False	10	-30	Individual_Deep_Q	1.0	simple_mlp	True	0.05	2500000	30	True
IndivQLearningParticleDNNOnlyOneHotMoreSeeds2/21_0_21	slugs_centralized	shields/momentum_shield	True	-10	True	ParticleMomentum	False	False	10	-30	Individual_Deep_Q	1.0	simple_mlp	True	0.05	2500000	31	True
IndivQLearningParticleDNNOnlyOneHotMoreSeeds2/22_0_22	slugs_centralized	shields/momentum_shield	True	-10	True	ParticleMomentum	False	False	10	-30	Individual_Deep_Q	1.0	simple_mlp	True	0.05	2500000	32	True
IndivQLearningParticleDNNOnlyOneHotMoreSeeds2/23_0_23	slugs_centralized	shields/momentum_shield	True	-10	True	ParticleMomentum	False	False	10	-30	Individual_Deep_Q	1.0	simple_mlp	True	0.05	2500000	33	True
IndivQLearningParticleDNNOnlyOneHotMoreSeeds2/24_0_24	slugs_centralized	shields/momentum_shield	True	-10	True	ParticleMomentum	False	False	10	-30	Individual_Deep_Q	1.0	simple_mlp	True	0.05	2500000	34	True
IndivQLearningParticleDNNOnlyOneHotMoreSeeds2/25_0_25	slugs_centralized	shields/momentum_shield	True	-10	True	ParticleMomentum	False	False	10	-30	Individual_Deep_Q	1.0	simple_mlp	True	0.05	2500000	35	True
IndivQLearningParticleDNNOnlyOneHotMoreSeeds2/26_0_26	slugs_centralized	shields/momentum_shield	True	-10	True	ParticleMomentum	False	False	10	-30	Individual_Deep_Q	1.0	simple_mlp	True	0.05	2500000	36	True
IndivQLearningParticleDNNOnlyOneHotMoreSeeds2/27_0_27	slugs_centralized	shields/momentum_shield	True	-10	True	ParticleMomentum	False	False	10	-30	Individual_Deep_Q	1.0	simple_mlp	True	0.05	2500000	37	True
IndivQLearningParticleDNNOnlyOneHotMoreSeeds2/28_0_28	slugs_centralized	shields/momentum_shield	True	-10	True	ParticleMomentum	False	False	10	-30	Individual_Deep_Q	1.0	simple_mlp	True	0.05	2500000	38	True
IndivQLearningParticleDNNOnlyOneHotMoreSeeds2/29_0_29	slugs_centralized	shields/momentum_shield	True	-10	True	ParticleMomentum	False	False	10	-30	Individual_Deep_Q	1.0	simple_mlp	True	0.05	2500000	39	True
IndivQLearningParticleDNNOnlyOneHotMoreSeeds2/30_0_30	slugs_centralized	shields/momentum_shield	True	-10	True	ParticleMomentum	False	False	10	-30	Individual_Deep_Q	1.0	simple_mlp	True	0.05	2500000	40	True
IndivQLearningParticleDNNOnlyOneHotMoreSeeds2/31_0_31	slugs_centralized	shields/momentum_shield	True	-10	True	ParticleMomentum	False	False	10	-30	Individual_Deep_Q	1.0	simple_mlp	True	0.05	2500000	41	True
IndivQLearningParticleDNNOnlyOneHotMoreSeeds2/32_0_32	slugs_centralized	shields/momentum_shield	True	-10	True	ParticleMomentum	False	False	10	-30	Individual_Deep_Q	1.0	simple_mlp	True	0.05	2500000	42	True
IndivQLearningParticleDNNOnlyOneHotMoreSeeds2/33_0_33	slugs_centralized	shields/momentum_shield	True	-10	True	ParticleMomentum	False	False	10	-30	Individual_Deep_Q	1.0	simple_mlp	True	0.05	2500000	43	True
IndivQLearningParticleDNNOnlyOneHotMoreSeeds2/34_0_34	slugs_centralized	shields/momentum_shield	True	-10	True	ParticleMomentum	False	False	10	-30	Individual_Deep_Q	1.0	simple_mlp	True	0.05	2500000	44	True
IndivQLearningParticleDNNOnlyOneHotMoreSeeds2/35_0_35	slugs_centralized	shields/momentum_shield	True	-10	True	ParticleMomentum	False	False	10	-30	Individual_Deep_Q	1.0	simple_mlp	True	0.05	2500000	45	True
IndivQLearningParticleDNNOnlyOneHotMoreSeeds2/36_0_36	slugs_centralized	shields/momentum_shield	True	-10	True	ParticleMomentum	False	False	10	-30	Individual_Deep_Q	1.0	simple_mlp	True	0.05	2500000	46	True
IndivQLearningParticleDNNOnlyOneHotMoreSeeds2/37_0_37	slugs_centralized	shields/momentum_shield	True	-10	True	ParticleMomentum	False	False	10	-30	Individual_Deep_Q	1.0	simple_mlp	True	0.05	2500000	47	True
IndivQLearningParticleDNNOnlyOneHotMoreSeeds2/38_0_38	slugs_centralized	shields/momentum_shield	True	-10	True	ParticleMomentum	False	False	10	-30	Individual_Deep_Q	1.0	simple_mlp	True	0.05	2500000	48	True
IndivQLearningParticleDNNOnlyOneHotMoreSeeds2/39_0_39	slugs_centralized	shields/momentum_shield	True	-10	True	ParticleMomentum	False	False	10	-30	Individual_Deep_Q	1.0	simple_mlp	True	0.05	2500000	49	True
IndivQLearningParticleDNNOnlyOneHotMoreSeeds2/40_1_0	slugs_decentralized	shields/momentum_shield	True	-10	True	ParticleMomentum	False	False	10	-30	Individual_Deep_Q	1.0	simple_mlp	True	0.05	2500000	10	True
IndivQLearningParticleDNNOnlyOneHotMoreSeeds2/41_1_1	slugs_decentralized	shields/momentum_shield	True	-10	True	ParticleMomentum	False	False	10	-30	Individual_Deep_Q	1.0	simple_mlp	True	0.05	2500000	11	True
IndivQLearningParticleDNNOnlyOneHotMoreSeeds2/42_1_2	slugs_decentralized	shields/momentum_shield	True	-10	True	ParticleMomentum	False	False	10	-30	Individual_Deep_Q	1.0	simple_mlp	True	0.05	2500000	12	True
IndivQLearningParticleDNNOnlyOneHotMoreSeeds2/43_1_3	slugs_decentralized	shields/momentum_shield	True	-10	True	ParticleMomentum	False	False	10	-30	Individual_Deep_Q	1.0	simple_mlp	True	0.05	2500000	13	True
IndivQLearningParticleDNNOnlyOneHotMoreSeeds2/44_1_4	slugs_decentralized	shields/momentum_shield	True	-10	True	ParticleMomentum	False	False	10	-30	Individual_Deep_Q	1.0	simple_mlp	True	0.05	2500000	14	True
IndivQLearningParticleDNNOnlyOneHotMoreSeeds2/45_1_5	slugs_decentralized	shields/momentum_shield	True	-10	True	ParticleMomentum	False	False	10	-30	Individual_Deep_Q	1.0	simple_mlp	True	0.05	2500000	15	True
IndivQLearningParticleDNNOnlyOneHotMoreSeeds2/46_1_6	slugs_decentralized	shields/momentum_shield	True	-10	True	ParticleMomentum	False	False	10	-30	Individual_Deep_Q	1.0	simple_mlp	True	0.05	2500000	16	True
IndivQLearningParticleDNNOnlyOneHotMoreSeeds2/47_1_7	slugs_decentralized	shields/momentum_shield	True	-10	True	ParticleMomentum	False	False	10	-30	Individual_Deep_Q	1.0	simple_mlp	True	0.05	2500000	17	True
IndivQLearningParticleDNNOnlyOneHotMoreSeeds2/48_1_8	slugs_decentralized	shields/momentum_shield	True	-10	True	ParticleMomentum	False	False	10	-30	Individual_Deep_Q	1.0	simple_mlp	True	0.05	2500000	18	True
IndivQLearningParticleDNNOnlyOneHotMoreSeeds2/49_1_9	slugs_decentralized	shields/momentum_shield	True	-10	True	ParticleMomentum	False	False	10	-30	Individual_Deep_Q	1.0	simple_mlp	True	0.05	2500000	19	True
IndivQLearningParticleDNNOnlyOneHotMoreSeeds2/50_1_10	slugs_decentralized	shields/momentum_shield	True	-10	True	ParticleMomentum	False	False	10	-30	Individual_Deep_Q	1.0	simple_mlp	True	0.05	2500000	20	True
IndivQLearningParticleDNNOnlyOneHotMoreSeeds2/51_1_11	slugs_decentralized	shields/momentum_shield	True	-10	True	ParticleMomentum	False	False	10	-30	Individual_Deep_Q	1.0	simple_mlp	True	0.05	2500000	21	True
IndivQLearningParticleDNNOnlyOneHotMoreSeeds2/52_1_12	slugs_decentralized	shields/momentum_shield	True	-10	True	ParticleMomentum	False	False	10	-30	Individual_Deep_Q	1.0	simple_mlp	True	0.05	2500000	22	True
IndivQLearningParticleDNNOnlyOneHotMoreSeeds2/53_1_13	slugs_decentralized	shields/momentum_shield	True	-10	True	ParticleMomentum	False	False	10	-30	Individual_Deep_Q	1.0	simple_mlp	True	0.05	2500000	23	True
IndivQLearningParticleDNNOnlyOneHotMoreSeeds2/54_1_14	slugs_decentralized	shields/momentum_shield	True	-10	True	ParticleMomentum	False	False	10	-30	Individual_Deep_Q	1.0	simple_mlp	True	0.05	2500000	24	True
IndivQLearningParticleDNNOnlyOneHotMoreSeeds2/55_1_15	slugs_decentralized	shields/momentum_shield	True	-10	True	ParticleMomentum	False	False	10	-30	Individual_Deep_Q	1.0	simple_mlp	True	0.05	2500000	25	True
IndivQLearningParticleDNNOnlyOneHotMoreSeeds2/56_1_16	slugs_decentralized	shields/momentum_shield	True	-10	True	ParticleMomentum	False	False	10	-30	Individual_Deep_Q	1.0	simple_mlp	True	0.05	2500000	26	True
IndivQLearningParticleDNNOnlyOneHotMoreSeeds2/57_1_17	slugs_decentralized	shields/momentum_shield	True	-10	True	ParticleMomentum	False	False	10	-30	Individual_Deep_Q	1.0	simple_mlp	True	0.05	2500000	27	True
IndivQLearningParticleDNNOnlyOneHotMoreSeeds2/58_1_18	slugs_decentralized	shields/momentum_shield	True	-10	True	ParticleMomentum	False	False	10	-30	Individual_Deep_Q	1.0	simple_mlp	True	0.05	2500000	28	True
IndivQLearningParticleDNNOnlyOneHotMoreSeeds2/59_1_19	slugs_decentralized	shields/momentum_shield	True	-10	True	ParticleMomentum	False	False	10	-30	Individual_Deep_Q	1.0	simple_mlp	True	0.05	2500000	29	True
IndivQLearningParticleDNNOnlyOneHotMoreSeeds2/60_1_20	slugs_decentralized	shields/momentum_shield	True	-10	True	ParticleMomentum	False	False	10	-30	Individual_Deep_Q	1.0	simple_mlp	True	0.05	2500000	30	True
IndivQLearningParticleDNNOnlyOneHotMoreSeeds2/61_1_21	slugs_decentralized	shields/momentum_shield	True	-10	True	ParticleMomentum	False	False	10	-30	Individual_Deep_Q	1.0	simple_mlp	True	0.05	2500000	31	True
IndivQLearningParticleDNNOnlyOneHotMoreSeeds2/62_1_22	slugs_decentralized	shields/momentum_shield	True	-10	True	ParticleMomentum	False	False	10	-30	Individual_Deep_Q	1.0	simple_mlp	True	0.05	2500000	32	True
IndivQLearningParticleDNNOnlyOneHotMoreSeeds2/63_1_23	slugs_decentralized	shields/momentum_shield	True	-10	True	ParticleMomentum	False	False	10	-30	Individual_Deep_Q	1.0	simple_mlp	True	0.05	2500000	33	True
IndivQLearningParticleDNNOnlyOneHotMoreSeeds2/64_1_24	slugs_decentralized	shields/momentum_shield	True	-10	True	ParticleMomentum	False	False	10	-30	Individual_Deep_Q	1.0	simple_mlp	True	0.05	2500000	34	True
IndivQLearningParticleDNNOnlyOneHotMoreSeeds2/65_1_25	slugs_decentralized	shields/momentum_shield	True	-10	True	ParticleMomentum	False	False	10	-30	Individual_Deep_Q	1.0	simple_mlp	True	0.05	2500000	35	True
IndivQLearningParticleDNNOnlyOneHotMoreSeeds2/66_1_26	slugs_decentralized	shields/momentum_shield	True	-10	True	ParticleMomentum	False	False	10	-30	Individual_Deep_Q	1.0	simple_mlp	True	0.05	2500000	36	True
IndivQLearningParticleDNNOnlyOneHotMoreSeeds2/67_1_27	slugs_decentralized	shields/momentum_shield	True	-10	True	ParticleMomentum	False	False	10	-30	Individual_Deep_Q	1.0	simple_mlp	True	0.05	2500000	37	True
IndivQLearningParticleDNNOnlyOneHotMoreSeeds2/68_1_28	slugs_decentralized	shields/momentum_shield	True	-10	True	ParticleMomentum	False	False	10	-30	Individual_Deep_Q	1.0	simple_mlp	True	0.05	2500000	38	True
IndivQLearningParticleDNNOnlyOneHotMoreSeeds2/69_1_29	slugs_decentralized	shields/momentum_shield	True	-10	True	ParticleMomentum	False	False	10	-30	Individual_Deep_Q	1.0	simple_mlp	True	0.05	2500000	39	True
IndivQLearningParticleDNNOnlyOneHotMoreSeeds2/70_1_30	slugs_decentralized	shields/momentum_shield	True	-10	True	ParticleMomentum	False	False	10	-30	Individual_Deep_Q	1.0	simple_mlp	True	0.05	2500000	40	True
IndivQLearningParticleDNNOnlyOneHotMoreSeeds2/71_1_31	slugs_decentralized	shields/momentum_shield	True	-10	True	ParticleMomentum	False	False	10	-30	Individual_Deep_Q	1.0	simple_mlp	True	0.05	2500000	41	True
IndivQLearningParticleDNNOnlyOneHotMoreSeeds2/72_1_32	slugs_decentralized	shields/momentum_shield	True	-10	True	ParticleMomentum	False	False	10	-30	Individual_Deep_Q	1.0	simple_mlp	True	0.05	2500000	42	True
IndivQLearningParticleDNNOnlyOneHotMoreSeeds2/73_1_33	slugs_decentralized	shields/momentum_shield	True	-10	True	ParticleMomentum	False	False	10	-30	Individual_Deep_Q	1.0	simple_mlp	True	0.05	2500000	43	True
IndivQLearningParticleDNNOnlyOneHotMoreSeeds2/74_1_34	slugs_decentralized	shields/momentum_shield	True	-10	True	ParticleMomentum	False	False	10	-30	Individual_Deep_Q	1.0	simple_mlp	True	0.05	2500000	44	True
IndivQLearningParticleDNNOnlyOneHotMoreSeeds2/75_1_35	slugs_decentralized	shields/momentum_shield	True	-10	True	ParticleMomentum	False	False	10	-30	Individual_Deep_Q	1.0	simple_mlp	True	0.05	2500000	45	True
IndivQLearningParticleDNNOnlyOneHotMoreSeeds2/76_1_36	slugs_decentralized	shields/momentum_shield	True	-10	True	ParticleMomentum	False	False	10	-30	Individual_Deep_Q	1.0	simple_mlp	True	0.05	2500000	46	True
IndivQLearningParticleDNNOnlyOneHotMoreSeeds2/77_1_37	slugs_decentralized	shields/momentum_shield	True	-10	True	ParticleMomentum	False	False	10	-30	Individual_Deep_Q	1.0	simple_mlp	True	0.05	2500000	47	True
IndivQLearningParticleDNNOnlyOneHotMoreSeeds2/78_1_38	slugs_decentralized	shields/momentum_shield	True	-10	True	ParticleMomentum	False	False	10	-30	Individual_Deep_Q	1.0	simple_mlp	True	0.05	2500000	48	True
IndivQLearningParticleDNNOnlyOneHotMoreSeeds2/79_1_39	slugs_decentralized	shields/momentum_shield	True	-10	True	ParticleMomentum	False	False	10	-30	Individual_Deep_Q	1.0	simple_mlp	True	0.05	2500000	49	True
IndivQLearningParticleDNNOnlyOneHotMoreSeeds2/80_2_0	none		True	-10	True	ParticleMomentum	False	False	10	-30	Individual_Deep_Q	1.0	simple_mlp	True	0.05	2500000	10	True
IndivQLearningParticleDNNOnlyOneHotMoreSeeds2/81_2_1	none		True	-10	True	ParticleMomentum	False	False	10	-30	Individual_Deep_Q	1.0	simple_mlp	True	0.05	2500000	11	True
IndivQLearningParticleDNNOnlyOneHotMoreSeeds2/82_2_2	none		True	-10	True	ParticleMomentum	False	False	10	-30	Individual_Deep_Q	1.0	simple_mlp	True	0.05	2500000	12	True
IndivQLearningParticleDNNOnlyOneHotMoreSeeds2/83_2_3	none		True	-10	True	ParticleMomentum	False	False	10	-30	Individual_Deep_Q	1.0	simple_mlp	True	0.05	2500000	13	True
IndivQLearningParticleDNNOnlyOneHotMoreSeeds2/84_2_4	none		True	-10	True	ParticleMomentum	False	False	10	-30	Individual_Deep_Q	1.0	simple_mlp	True	0.05	2500000	14	True
IndivQLearningParticleDNNOnlyOneHotMoreSeeds2/85_2_5	none		True	-10	True	ParticleMomentum	False	False	10	-30	Individual_Deep_Q	1.0	simple_mlp	True	0.05	2500000	15	True
IndivQLearningParticleDNNOnlyOneHotMoreSeeds2/86_2_6	none		True	-10	True	ParticleMomentum	False	False	10	-30	Individual_Deep_Q	1.0	simple_mlp	True	0.05	2500000	16	True
IndivQLearningParticleDNNOnlyOneHotMoreSeeds2/87_2_7	none		True	-10	True	ParticleMomentum	False	False	10	-30	Individual_Deep_Q	1.0	simple_mlp	True	0.05	2500000	17	True
IndivQLearningParticleDNNOnlyOneHotMoreSeeds2/88_2_8	none		True	-10	True	ParticleMomentum	False	False	10	-30	Individual_Deep_Q	1.0	simple_mlp	True	0.05	2500000	18	True
IndivQLearningParticleDNNOnlyOneHotMoreSeeds2/89_2_9	none		True	-10	True	ParticleMomentum	False	False	10	-30	Individual_Deep_Q	1.0	simple_mlp	True	0.05	2500000	19	True
IndivQLearningParticleDNNOnlyOneHotMoreSeeds2/90_2_10	none		True	-10	True	ParticleMomentum	False	False	10	-30	Individual_Deep_Q	1.0	simple_mlp	True	0.05	2500000	20	True
IndivQLearningParticleDNNOnlyOneHotMoreSeeds2/91_2_11	none		True	-10	True	ParticleMomentum	False	False	10	-30	Individual_Deep_Q	1.0	simple_mlp	True	0.05	2500000	21	True
IndivQLearningParticleDNNOnlyOneHotMoreSeeds2/92_2_12	none		True	-10	True	ParticleMomentum	False	False	10	-30	Individual_Deep_Q	1.0	simple_mlp	True	0.05	2500000	22	True
IndivQLearningParticleDNNOnlyOneHotMoreSeeds2/93_2_13	none		True	-10	True	ParticleMomentum	False	False	10	-30	Individual_Deep_Q	1.0	simple_mlp	True	0.05	2500000	23	True
IndivQLearningParticleDNNOnlyOneHotMoreSeeds2/94_2_14	none		True	-10	True	ParticleMomentum	False	False	10	-30	Individual_Deep_Q	1.0	simple_mlp	True	0.05	2500000	24	True
IndivQLearningParticleDNNOnlyOneHotMoreSeeds2/95_2_15	none		True	-10	True	ParticleMomentum	False	False	10	-30	Individual_Deep_Q	1.0	simple_mlp	True	0.05	2500000	25	True
IndivQLearningParticleDNNOnlyOneHotMoreSeeds2/96_2_16	none		True	-10	True	ParticleMomentum	False	False	10	-30	Individual_Deep_Q	1.0	simple_mlp	True	0.05	2500000	26	True
IndivQLearningParticleDNNOnlyOneHotMoreSeeds2/97_2_17	none		True	-10	True	ParticleMomentum	False	False	10	-30	Individual_Deep_Q	1.0	simple_mlp	True	0.05	2500000	27	True
IndivQLearningParticleDNNOnlyOneHotMoreSeeds2/98_2_18	none		True	-10	True	ParticleMomentum	False	False	10	-30	Individual_Deep_Q	1.0	simple_mlp	True	0.05	2500000	28	True
IndivQLearningParticleDNNOnlyOneHotMoreSeeds2/99_2_19	none		True	-10	True	ParticleMomentum	False	False	10	-30	Individual_Deep_Q	1.0	simple_mlp	True	0.05	2500000	29	True
IndivQLearningParticleDNNOnlyOneHotMoreSeeds2/100_2_20	none		True	-10	True	ParticleMomentum	False	False	10	-30	Individual_Deep_Q	1.0	simple_mlp	True	0.05	2500000	30	True
IndivQLearningParticleDNNOnlyOneHotMoreSeeds2/101_2_21	none		True	-10	True	ParticleMomentum	False	False	10	-30	Individual_Deep_Q	1.0	simple_mlp	True	0.05	2500000	31	True
IndivQLearningParticleDNNOnlyOneHotMoreSeeds2/102_2_22	none		True	-10	True	ParticleMomentum	False	False	10	-30	Individual_Deep_Q	1.0	simple_mlp	True	0.05	2500000	32	True
IndivQLearningParticleDNNOnlyOneHotMoreSeeds2/103_2_23	none		True	-10	True	ParticleMomentum	False	False	10	-30	Individual_Deep_Q	1.0	simple_mlp	True	0.05	2500000	33	True
IndivQLearningParticleDNNOnlyOneHotMoreSeeds2/104_2_24	none		True	-10	True	ParticleMomentum	False	False	10	-30	Individual_Deep_Q	1.0	simple_mlp	True	0.05	2500000	34	True
IndivQLearningParticleDNNOnlyOneHotMoreSeeds2/105_2_25	none		True	-10	True	ParticleMomentum	False	False	10	-30	Individual_Deep_Q	1.0	simple_mlp	True	0.05	2500000	35	True
IndivQLearningParticleDNNOnlyOneHotMoreSeeds2/106_2_26	none		True	-10	True	ParticleMomentum	False	False	10	-30	Individual_Deep_Q	1.0	simple_mlp	True	0.05	2500000	36	True
IndivQLearningParticleDNNOnlyOneHotMoreSeeds2/107_2_27	none		True	-10	True	ParticleMomentum	False	False	10	-30	Individual_Deep_Q	1.0	simple_mlp	True	0.05	2500000	37	True
IndivQLearningParticleDNNOnlyOneHotMoreSeeds2/108_2_28	none		True	-10	True	ParticleMomentum	False	False	10	-30	Individual_Deep_Q	1.0	simple_mlp	True	0.05	2500000	38	True
IndivQLearningParticleDNNOnlyOneHotMoreSeeds2/109_2_29	none		True	-10	True	ParticleMomentum	False	False	10	-30	Individual_Deep_Q	1.0	simple_mlp	True	0.05	2500000	39	True
IndivQLearningParticleDNNOnlyOneHotMoreSeeds2/110_2_30	none		True	-10	True	ParticleMomentum	False	False	10	-30	Individual_Deep_Q	1.0	simple_mlp	True	0.05	2500000	40	True
IndivQLearningParticleDNNOnlyOneHotMoreSeeds2/111_2_31	none		True	-10	True	ParticleMomentum	False	False	10	-30	Individual_Deep_Q	1.0	simple_mlp	True	0.05	2500000	41	True
IndivQLearningParticleDNNOnlyOneHotMoreSeeds2/112_2_32	none		True	-10	True	ParticleMomentum	False	False	10	-30	Individual_Deep_Q	1.0	simple_mlp	True	0.05	2500000	42	True
IndivQLearningParticleDNNOnlyOneHotMoreSeeds2/113_2_33	none		True	-10	True	ParticleMomentum	False	False	10	-30	Individual_Deep_Q	1.0	simple_mlp	True	0.05	2500000	43	True
IndivQLearningParticleDNNOnlyOneHotMoreSeeds2/114_2_34	none		True	-10	True	ParticleMomentum	False	False	10	-30	Individual_Deep_Q	1.0	simple_mlp	True	0.05	2500000	44	True
IndivQLearningParticleDNNOnlyOneHotMoreSeeds2/115_2_35	none		True	-10	True	ParticleMomentum	False	False	10	-30	Individual_Deep_Q	1.0	simple_mlp	True	0.05	2500000	45	True
IndivQLearningParticleDNNOnlyOneHotMoreSeeds2/116_2_36	none		True	-10	True	ParticleMomentum	False	False	10	-30	Individual_Deep_Q	1.0	simple_mlp	True	0.05	2500000	46	True
IndivQLearningParticleDNNOnlyOneHotMoreSeeds2/117_2_37	none		True	-10	True	ParticleMomentum	False	False	10	-30	Individual_Deep_Q	1.0	simple_mlp	True	0.05	2500000	47	True
IndivQLearningParticleDNNOnlyOneHotMoreSeeds2/118_2_38	none		True	-10	True	ParticleMomentum	False	False	10	-30	Individual_Deep_Q	1.0	simple_mlp	True	0.05	2500000	48	True
IndivQLearningParticleDNNOnlyOneHotMoreSeeds2/119_2_39	none		True	-10	True	ParticleMomentum	False	False	10	-30	Individual_Deep_Q	1.0	simple_mlp	True	0.05	2500000	49	True
IndivQLearningParticleDNNOnlyOneHotMoreSeeds2/120_3_0	slugs_centralized	shields/momentum_shield	True	-10	False	ParticleMomentum	False	False	10	-30	Individual_Deep_Q	1.0	simple_mlp	True	0.05	2500000	10	True
IndivQLearningParticleDNNOnlyOneHotMoreSeeds2/121_3_1	slugs_centralized	shields/momentum_shield	True	-10	False	ParticleMomentum	False	False	10	-30	Individual_Deep_Q	1.0	simple_mlp	True	0.05	2500000	11	True
IndivQLearningParticleDNNOnlyOneHotMoreSeeds2/122_3_2	slugs_centralized	shields/momentum_shield	True	-10	False	ParticleMomentum	False	False	10	-30	Individual_Deep_Q	1.0	simple_mlp	True	0.05	2500000	12	True
IndivQLearningParticleDNNOnlyOneHotMoreSeeds2/123_3_3	slugs_centralized	shields/momentum_shield	True	-10	False	ParticleMomentum	False	False	10	-30	Individual_Deep_Q	1.0	simple_mlp	True	0.05	2500000	13	True
IndivQLearningParticleDNNOnlyOneHotMoreSeeds2/124_3_4	slugs_centralized	shields/momentum_shield	True	-10	False	ParticleMomentum	False	False	10	-30	Individual_Deep_Q	1.0	simple_mlp	True	0.05	2500000	14	True
IndivQLearningParticleDNNOnlyOneHotMoreSeeds2/125_3_5	slugs_centralized	shields/momentum_shield	True	-10	False	ParticleMomentum	False	False	10	-30	Individual_Deep_Q	1.0	simple_mlp	True	0.05	2500000	15	True
IndivQLearningParticleDNNOnlyOneHotMoreSeeds2/126_3_6	slugs_centralized	shields/momentum_shield	True	-10	False	ParticleMomentum	False	False	10	-30	Individual_Deep_Q	1.0	simple_mlp	True	0.05	2500000	16	True
IndivQLearningParticleDNNOnlyOneHotMoreSeeds2/127_3_7	slugs_centralized	shields/momentum_shield	True	-10	False	ParticleMomentum	False	False	10	-30	Individual_Deep_Q	1.0	simple_mlp	True	0.05	2500000	17	True
IndivQLearningParticleDNNOnlyOneHotMoreSeeds2/128_3_8	slugs_centralized	shields/momentum_shield	True	-10	False	ParticleMomentum	False	False	10	-30	Individual_Deep_Q	1.0	simple_mlp	True	0.05	2500000	18	True
IndivQLearningParticleDNNOnlyOneHotMoreSeeds2/129_3_9	slugs_centralized	shields/momentum_shield	True	-10	False	ParticleMomentum	False	False	10	-30	Individual_Deep_Q	1.0	simple_mlp	True	0.05	2500000	19	True
IndivQLearningParticleDNNOnlyOneHotMoreSeeds2/130_3_10	slugs_centralized	shields/momentum_shield	True	-10	False	ParticleMomentum	False	False	10	-30	Individual_Deep_Q	1.0	simple_mlp	True	0.05	2500000	20	True
IndivQLearningParticleDNNOnlyOneHotMoreSeeds2/131_3_11	slugs_centralized	shields/momentum_shield	True	-10	False	ParticleMomentum	False	False	10	-30	Individual_Deep_Q	1.0	simple_mlp	True	0.05	2500000	21	True
IndivQLearningParticleDNNOnlyOneHotMoreSeeds2/132_3_12	slugs_centralized	shields/momentum_shield	True	-10	False	ParticleMomentum	False	False	10	-30	Individual_Deep_Q	1.0	simple_mlp	True	0.05	2500000	22	True
IndivQLearningParticleDNNOnlyOneHotMoreSeeds2/133_3_13	slugs_centralized	shields/momentum_shield	True	-10	False	ParticleMomentum	False	False	10	-30	Individual_Deep_Q	1.0	simple_mlp	True	0.05	2500000	23	True
IndivQLearningParticleDNNOnlyOneHotMoreSeeds2/134_3_14	slugs_centralized	shields/momentum_shield	True	-10	False	ParticleMomentum	False	False	10	-30	Individual_Deep_Q	1.0	simple_mlp	True	0.05	2500000	24	True
IndivQLearningParticleDNNOnlyOneHotMoreSeeds2/135_3_15	slugs_centralized	shields/momentum_shield	True	-10	False	ParticleMomentum	False	False	10	-30	Individual_Deep_Q	1.0	simple_mlp	True	0.05	2500000	25	True
IndivQLearningParticleDNNOnlyOneHotMoreSeeds2/136_3_16	slugs_centralized	shields/momentum_shield	True	-10	False	ParticleMomentum	False	False	10	-30	Individual_Deep_Q	1.0	simple_mlp	True	0.05	2500000	26	True
IndivQLearningParticleDNNOnlyOneHotMoreSeeds2/137_3_17	slugs_centralized	shields/momentum_shield	True	-10	False	ParticleMomentum	False	False	10	-30	Individual_Deep_Q	1.0	simple_mlp	True	0.05	2500000	27	True
IndivQLearningParticleDNNOnlyOneHotMoreSeeds2/138_3_18	slugs_centralized	shields/momentum_shield	True	-10	False	ParticleMomentum	False	False	10	-30	Individual_Deep_Q	1.0	simple_mlp	True	0.05	2500000	28	True
IndivQLearningParticleDNNOnlyOneHotMoreSeeds2/139_3_19	slugs_centralized	shields/momentum_shield	True	-10	False	ParticleMomentum	False	False	10	-30	Individual_Deep_Q	1.0	simple_mlp	True	0.05	2500000	29	True
IndivQLearningParticleDNNOnlyOneHotMoreSeeds2/140_3_20	slugs_centralized	shields/momentum_shield	True	-10	False	ParticleMomentum	False	False	10	-30	Individual_Deep_Q	1.0	simple_mlp	True	0.05	2500000	30	True
IndivQLearningParticleDNNOnlyOneHotMoreSeeds2/141_3_21	slugs_centralized	shields/momentum_shield	True	-10	False	ParticleMomentum	False	False	10	-30	Individual_Deep_Q	1.0	simple_mlp	True	0.05	2500000	31	True
IndivQLearningParticleDNNOnlyOneHotMoreSeeds2/142_3_22	slugs_centralized	shields/momentum_shield	True	-10	False	ParticleMomentum	False	False	10	-30	Individual_Deep_Q	1.0	simple_mlp	True	0.05	2500000	32	True
IndivQLearningParticleDNNOnlyOneHotMoreSeeds2/143_3_23	slugs_centralized	shields/momentum_shield	True	-10	False	ParticleMomentum	False	False	10	-30	Individual_Deep_Q	1.0	simple_mlp	True	0.05	2500000	33	True
IndivQLearningParticleDNNOnlyOneHotMoreSeeds2/144_3_24	slugs_centralized	shields/momentum_shield	True	-10	False	ParticleMomentum	False	False	10	-30	Individual_Deep_Q	1.0	simple_mlp	True	0.05	2500000	34	True
IndivQLearningParticleDNNOnlyOneHotMoreSeeds2/145_3_25	slugs_centralized	shields/momentum_shield	True	-10	False	ParticleMomentum	False	False	10	-30	Individual_Deep_Q	1.0	simple_mlp	True	0.05	2500000	35	True
IndivQLearningParticleDNNOnlyOneHotMoreSeeds2/146_3_26	slugs_centralized	shields/momentum_shield	True	-10	False	ParticleMomentum	False	False	10	-30	Individual_Deep_Q	1.0	simple_mlp	True	0.05	2500000	36	True
IndivQLearningParticleDNNOnlyOneHotMoreSeeds2/147_3_27	slugs_centralized	shields/momentum_shield	True	-10	False	ParticleMomentum	False	False	10	-30	Individual_Deep_Q	1.0	simple_mlp	True	0.05	2500000	37	True
IndivQLearningParticleDNNOnlyOneHotMoreSeeds2/148_3_28	slugs_centralized	shields/momentum_shield	True	-10	False	ParticleMomentum	False	False	10	-30	Individual_Deep_Q	1.0	simple_mlp	True	0.05	2500000	38	True
IndivQLearningParticleDNNOnlyOneHotMoreSeeds2/149_3_29	slugs_centralized	shields/momentum_shield	True	-10	False	ParticleMomentum	False	False	10	-30	Individual_Deep_Q	1.0	simple_mlp	True	0.05	2500000	39	True
IndivQLearningParticleDNNOnlyOneHotMoreSeeds2/150_3_30	slugs_centralized	shields/momentum_shield	True	-10	False	ParticleMomentum	False	False	10	-30	Individual_Deep_Q	1.0	simple_mlp	True	0.05	2500000	40	True
IndivQLearningParticleDNNOnlyOneHotMoreSeeds2/151_3_31	slugs_centralized	shields/momentum_shield	True	-10	False	ParticleMomentum	False	False	10	-30	Individual_Deep_Q	1.0	simple_mlp	True	0.05	2500000	41	True
IndivQLearningParticleDNNOnlyOneHotMoreSeeds2/152_3_32	slugs_centralized	shields/momentum_shield	True	-10	False	ParticleMomentum	False	False	10	-30	Individual_Deep_Q	1.0	simple_mlp	True	0.05	2500000	42	True
IndivQLearningParticleDNNOnlyOneHotMoreSeeds2/153_3_33	slugs_centralized	shields/momentum_shield	True	-10	False	ParticleMomentum	False	False	10	-30	Individual_Deep_Q	1.0	simple_mlp	True	0.05	2500000	43	True
IndivQLearningParticleDNNOnlyOneHotMoreSeeds2/154_3_34	slugs_centralized	shields/momentum_shield	True	-10	False	ParticleMomentum	False	False	10	-30	Individual_Deep_Q	1.0	simple_mlp	True	0.05	2500000	44	True
IndivQLearningParticleDNNOnlyOneHotMoreSeeds2/155_3_35	slugs_centralized	shields/momentum_shield	True	-10	False	ParticleMomentum	False	False	10	-30	Individual_Deep_Q	1.0	simple_mlp	True	0.05	2500000	45	True
IndivQLearningParticleDNNOnlyOneHotMoreSeeds2/156_3_36	slugs_centralized	shields/momentum_shield	True	-10	False	ParticleMomentum	False	False	10	-30	Individual_Deep_Q	1.0	simple_mlp	True	0.05	2500000	46	True
IndivQLearningParticleDNNOnlyOneHotMoreSeeds2/157_3_37	slugs_centralized	shields/momentum_shield	True	-10	False	ParticleMomentum	False	False	10	-30	Individual_Deep_Q	1.0	simple_mlp	True	0.05	2500000	47	True
IndivQLearningParticleDNNOnlyOneHotMoreSeeds2/158_3_38	slugs_centralized	shields/momentum_shield	True	-10	False	ParticleMomentum	False	False	10	-30	Individual_Deep_Q	1.0	simple_mlp	True	0.05	2500000	48	True
IndivQLearningParticleDNNOnlyOneHotMoreSeeds2/159_3_39	slugs_centralized	shields/momentum_shield	True	-10	False	ParticleMomentum	False	False	10	-30	Individual_Deep_Q	1.0	simple_mlp	True	0.05	2500000	49	True
IndivQLearningParticleDNNOnlyOneHotMoreSeeds2/160_4_0	slugs_decentralized	shields/momentum_shield	True	-10	False	ParticleMomentum	False	False	10	-30	Individual_Deep_Q	1.0	simple_mlp	True	0.05	2500000	10	True
IndivQLearningParticleDNNOnlyOneHotMoreSeeds2/161_4_1	slugs_decentralized	shields/momentum_shield	True	-10	False	ParticleMomentum	False	False	10	-30	Individual_Deep_Q	1.0	simple_mlp	True	0.05	2500000	11	True
IndivQLearningParticleDNNOnlyOneHotMoreSeeds2/162_4_2	slugs_decentralized	shields/momentum_shield	True	-10	False	ParticleMomentum	False	False	10	-30	Individual_Deep_Q	1.0	simple_mlp	True	0.05	2500000	12	True
IndivQLearningParticleDNNOnlyOneHotMoreSeeds2/163_4_3	slugs_decentralized	shields/momentum_shield	True	-10	False	ParticleMomentum	False	False	10	-30	Individual_Deep_Q	1.0	simple_mlp	True	0.05	2500000	13	True
IndivQLearningParticleDNNOnlyOneHotMoreSeeds2/164_4_4	slugs_decentralized	shields/momentum_shield	True	-10	False	ParticleMomentum	False	False	10	-30	Individual_Deep_Q	1.0	simple_mlp	True	0.05	2500000	14	True
IndivQLearningParticleDNNOnlyOneHotMoreSeeds2/165_4_5	slugs_decentralized	shields/momentum_shield	True	-10	False	ParticleMomentum	False	False	10	-30	Individual_Deep_Q	1.0	simple_mlp	True	0.05	2500000	15	True
IndivQLearningParticleDNNOnlyOneHotMoreSeeds2/166_4_6	slugs_decentralized	shields/momentum_shield	True	-10	False	ParticleMomentum	False	False	10	-30	Individual_Deep_Q	1.0	simple_mlp	True	0.05	2500000	16	True
IndivQLearningParticleDNNOnlyOneHotMoreSeeds2/167_4_7	slugs_decentralized	shields/momentum_shield	True	-10	False	ParticleMomentum	False	False	10	-30	Individual_Deep_Q	1.0	simple_mlp	True	0.05	2500000	17	True
IndivQLearningParticleDNNOnlyOneHotMoreSeeds2/168_4_8	slugs_decentralized	shields/momentum_shield	True	-10	False	ParticleMomentum	False	False	10	-30	Individual_Deep_Q	1.0	simple_mlp	True	0.05	2500000	18	True
IndivQLearningParticleDNNOnlyOneHotMoreSeeds2/169_4_9	slugs_decentralized	shields/momentum_shield	True	-10	False	ParticleMomentum	False	False	10	-30	Individual_Deep_Q	1.0	simple_mlp	True	0.05	2500000	19	True
IndivQLearningParticleDNNOnlyOneHotMoreSeeds2/170_4_10	slugs_decentralized	shields/momentum_shield	True	-10	False	ParticleMomentum	False	False	10	-30	Individual_Deep_Q	1.0	simple_mlp	True	0.05	2500000	20	True
IndivQLearningParticleDNNOnlyOneHotMoreSeeds2/171_4_11	slugs_decentralized	shields/momentum_shield	True	-10	False	ParticleMomentum	False	False	10	-30	Individual_Deep_Q	1.0	simple_mlp	True	0.05	2500000	21	True
IndivQLearningParticleDNNOnlyOneHotMoreSeeds2/172_4_12	slugs_decentralized	shields/momentum_shield	True	-10	False	ParticleMomentum	False	False	10	-30	Individual_Deep_Q	1.0	simple_mlp	True	0.05	2500000	22	True
IndivQLearningParticleDNNOnlyOneHotMoreSeeds2/173_4_13	slugs_decentralized	shields/momentum_shield	True	-10	False	ParticleMomentum	False	False	10	-30	Individual_Deep_Q	1.0	simple_mlp	True	0.05	2500000	23	True
IndivQLearningParticleDNNOnlyOneHotMoreSeeds2/174_4_14	slugs_decentralized	shields/momentum_shield	True	-10	False	ParticleMomentum	False	False	10	-30	Individual_Deep_Q	1.0	simple_mlp	True	0.05	2500000	24	True
IndivQLearningParticleDNNOnlyOneHotMoreSeeds2/175_4_15	slugs_decentralized	shields/momentum_shield	True	-10	False	ParticleMomentum	False	False	10	-30	Individual_Deep_Q	1.0	simple_mlp	True	0.05	2500000	25	True
IndivQLearningParticleDNNOnlyOneHotMoreSeeds2/176_4_16	slugs_decentralized	shields/momentum_shield	True	-10	False	ParticleMomentum	False	False	10	-30	Individual_Deep_Q	1.0	simple_mlp	True	0.05	2500000	26	True
IndivQLearningParticleDNNOnlyOneHotMoreSeeds2/177_4_17	slugs_decentralized	shields/momentum_shield	True	-10	False	ParticleMomentum	False	False	10	-30	Individual_Deep_Q	1.0	simple_mlp	True	0.05	2500000	27	True
IndivQLearningParticleDNNOnlyOneHotMoreSeeds2/178_4_18	slugs_decentralized	shields/momentum_shield	True	-10	False	ParticleMomentum	False	False	10	-30	Individual_Deep_Q	1.0	simple_mlp	True	0.05	2500000	28	True
IndivQLearningParticleDNNOnlyOneHotMoreSeeds2/179_4_19	slugs_decentralized	shields/momentum_shield	True	-10	False	ParticleMomentum	False	False	10	-30	Individual_Deep_Q	1.0	simple_mlp	True	0.05	2500000	29	True
IndivQLearningParticleDNNOnlyOneHotMoreSeeds2/180_4_20	slugs_decentralized	shields/momentum_shield	True	-10	False	ParticleMomentum	False	False	10	-30	Individual_Deep_Q	1.0	simple_mlp	True	0.05	2500000	30	True
IndivQLearningParticleDNNOnlyOneHotMoreSeeds2/181_4_21	slugs_decentralized	shields/momentum_shield	True	-10	False	ParticleMomentum	False	False	10	-30	Individual_Deep_Q	1.0	simple_mlp	True	0.05	2500000	31	True
IndivQLearningParticleDNNOnlyOneHotMoreSeeds2/182_4_22	slugs_decentralized	shields/momentum_shield	True	-10	False	ParticleMomentum	False	False	10	-30	Individual_Deep_Q	1.0	simple_mlp	True	0.05	2500000	32	True
IndivQLearningParticleDNNOnlyOneHotMoreSeeds2/183_4_23	slugs_decentralized	shields/momentum_shield	True	-10	False	ParticleMomentum	False	False	10	-30	Individual_Deep_Q	1.0	simple_mlp	True	0.05	2500000	33	True
IndivQLearningParticleDNNOnlyOneHotMoreSeeds2/184_4_24	slugs_decentralized	shields/momentum_shield	True	-10	False	ParticleMomentum	False	False	10	-30	Individual_Deep_Q	1.0	simple_mlp	True	0.05	2500000	34	True
IndivQLearningParticleDNNOnlyOneHotMoreSeeds2/185_4_25	slugs_decentralized	shields/momentum_shield	True	-10	False	ParticleMomentum	False	False	10	-30	Individual_Deep_Q	1.0	simple_mlp	True	0.05	2500000	35	True
IndivQLearningParticleDNNOnlyOneHotMoreSeeds2/186_4_26	slugs_decentralized	shields/momentum_shield	True	-10	False	ParticleMomentum	False	False	10	-30	Individual_Deep_Q	1.0	simple_mlp	True	0.05	2500000	36	True
IndivQLearningParticleDNNOnlyOneHotMoreSeeds2/187_4_27	slugs_decentralized	shields/momentum_shield	True	-10	False	ParticleMomentum	False	False	10	-30	Individual_Deep_Q	1.0	simple_mlp	True	0.05	2500000	37	True
IndivQLearningParticleDNNOnlyOneHotMoreSeeds2/188_4_28	slugs_decentralized	shields/momentum_shield	True	-10	False	ParticleMomentum	False	False	10	-30	Individual_Deep_Q	1.0	simple_mlp	True	0.05	2500000	38	True
IndivQLearningParticleDNNOnlyOneHotMoreSeeds2/189_4_29	slugs_decentralized	shields/momentum_shield	True	-10	False	ParticleMomentum	False	False	10	-30	Individual_Deep_Q	1.0	simple_mlp	True	0.05	2500000	39	True
IndivQLearningParticleDNNOnlyOneHotMoreSeeds2/190_4_30	slugs_decentralized	shields/momentum_shield	True	-10	False	ParticleMomentum	False	False	10	-30	Individual_Deep_Q	1.0	simple_mlp	True	0.05	2500000	40	True
IndivQLearningParticleDNNOnlyOneHotMoreSeeds2/191_4_31	slugs_decentralized	shields/momentum_shield	True	-10	False	ParticleMomentum	False	False	10	-30	Individual_Deep_Q	1.0	simple_mlp	True	0.05	2500000	41	True
IndivQLearningParticleDNNOnlyOneHotMoreSeeds2/192_4_32	slugs_decentralized	shields/momentum_shield	True	-10	False	ParticleMomentum	False	False	10	-30	Individual_Deep_Q	1.0	simple_mlp	True	0.05	2500000	42	True
IndivQLearningParticleDNNOnlyOneHotMoreSeeds2/193_4_33	slugs_decentralized	shields/momentum_shield	True	-10	False	ParticleMomentum	False	False	10	-30	Individual_Deep_Q	1.0	simple_mlp	True	0.05	2500000	43	True
IndivQLearningParticleDNNOnlyOneHotMoreSeeds2/194_4_34	slugs_decentralized	shields/momentum_shield	True	-10	False	ParticleMomentum	False	False	10	-30	Individual_Deep_Q	1.0	simple_mlp	True	0.05	2500000	44	True
IndivQLearningParticleDNNOnlyOneHotMoreSeeds2/195_4_35	slugs_decentralized	shields/momentum_shield	True	-10	False	ParticleMomentum	False	False	10	-30	Individual_Deep_Q	1.0	simple_mlp	True	0.05	2500000	45	True
IndivQLearningParticleDNNOnlyOneHotMoreSeeds2/196_4_36	slugs_decentralized	shields/momentum_shield	True	-10	False	ParticleMomentum	False	False	10	-30	Individual_Deep_Q	1.0	simple_mlp	True	0.05	2500000	46	True
IndivQLearningParticleDNNOnlyOneHotMoreSeeds2/197_4_37	slugs_decentralized	shields/momentum_shield	True	-10	False	ParticleMomentum	False	False	10	-30	Individual_Deep_Q	1.0	simple_mlp	True	0.05	2500000	47	True
IndivQLearningParticleDNNOnlyOneHotMoreSeeds2/198_4_38	slugs_decentralized	shields/momentum_shield	True	-10	False	ParticleMomentum	False	False	10	-30	Individual_Deep_Q	1.0	simple_mlp	True	0.05	2500000	48	True
IndivQLearningParticleDNNOnlyOneHotMoreSeeds2/199_4_39	slugs_decentralized	shields/momentum_shield	True	-10	False	ParticleMomentum	False	False	10	-30	Individual_Deep_Q	1.0	simple_mlp	True	0.05	2500000	49	True
IndivQLearningParticleDNNOnlyOneHotMoreSeeds2/200_5_0	none		True	-10	False	ParticleMomentum	False	False	10	-30	Individual_Deep_Q	1.0	simple_mlp	True	0.05	2500000	10	True
IndivQLearningParticleDNNOnlyOneHotMoreSeeds2/201_5_1	none		True	-10	False	ParticleMomentum	False	False	10	-30	Individual_Deep_Q	1.0	simple_mlp	True	0.05	2500000	11	True
IndivQLearningParticleDNNOnlyOneHotMoreSeeds2/202_5_2	none		True	-10	False	ParticleMomentum	False	False	10	-30	Individual_Deep_Q	1.0	simple_mlp	True	0.05	2500000	12	True
IndivQLearningParticleDNNOnlyOneHotMoreSeeds2/203_5_3	none		True	-10	False	ParticleMomentum	False	False	10	-30	Individual_Deep_Q	1.0	simple_mlp	True	0.05	2500000	13	True
IndivQLearningParticleDNNOnlyOneHotMoreSeeds2/204_5_4	none		True	-10	False	ParticleMomentum	False	False	10	-30	Individual_Deep_Q	1.0	simple_mlp	True	0.05	2500000	14	True
IndivQLearningParticleDNNOnlyOneHotMoreSeeds2/205_5_5	none		True	-10	False	ParticleMomentum	False	False	10	-30	Individual_Deep_Q	1.0	simple_mlp	True	0.05	2500000	15	True
IndivQLearningParticleDNNOnlyOneHotMoreSeeds2/206_5_6	none		True	-10	False	ParticleMomentum	False	False	10	-30	Individual_Deep_Q	1.0	simple_mlp	True	0.05	2500000	16	True
IndivQLearningParticleDNNOnlyOneHotMoreSeeds2/207_5_7	none		True	-10	False	ParticleMomentum	False	False	10	-30	Individual_Deep_Q	1.0	simple_mlp	True	0.05	2500000	17	True
IndivQLearningParticleDNNOnlyOneHotMoreSeeds2/208_5_8	none		True	-10	False	ParticleMomentum	False	False	10	-30	Individual_Deep_Q	1.0	simple_mlp	True	0.05	2500000	18	True
IndivQLearningParticleDNNOnlyOneHotMoreSeeds2/209_5_9	none		True	-10	False	ParticleMomentum	False	False	10	-30	Individual_Deep_Q	1.0	simple_mlp	True	0.05	2500000	19	True
IndivQLearningParticleDNNOnlyOneHotMoreSeeds2/210_5_10	none		True	-10	False	ParticleMomentum	False	False	10	-30	Individual_Deep_Q	1.0	simple_mlp	True	0.05	2500000	20	True
IndivQLearningParticleDNNOnlyOneHotMoreSeeds2/211_5_11	none		True	-10	False	ParticleMomentum	False	False	10	-30	Individual_Deep_Q	1.0	simple_mlp	True	0.05	2500000	21	True
IndivQLearningParticleDNNOnlyOneHotMoreSeeds2/212_5_12	none		True	-10	False	ParticleMomentum	False	False	10	-30	Individual_Deep_Q	1.0	simple_mlp	True	0.05	2500000	22	True
IndivQLearningParticleDNNOnlyOneHotMoreSeeds2/213_5_13	none		True	-10	False	ParticleMomentum	False	False	10	-30	Individual_Deep_Q	1.0	simple_mlp	True	0.05	2500000	23	True
IndivQLearningParticleDNNOnlyOneHotMoreSeeds2/214_5_14	none		True	-10	False	ParticleMomentum	False	False	10	-30	Individual_Deep_Q	1.0	simple_mlp	True	0.05	2500000	24	True
IndivQLearningParticleDNNOnlyOneHotMoreSeeds2/215_5_15	none		True	-10	False	ParticleMomentum	False	False	10	-30	Individual_Deep_Q	1.0	simple_mlp	True	0.05	2500000	25	True
IndivQLearningParticleDNNOnlyOneHotMoreSeeds2/216_5_16	none		True	-10	False	ParticleMomentum	False	False	10	-30	Individual_Deep_Q	1.0	simple_mlp	True	0.05	2500000	26	True
IndivQLearningParticleDNNOnlyOneHotMoreSeeds2/217_5_17	none		True	-10	False	ParticleMomentum	False	False	10	-30	Individual_Deep_Q	1.0	simple_mlp	True	0.05	2500000	27	True
IndivQLearningParticleDNNOnlyOneHotMoreSeeds2/218_5_18	none		True	-10	False	ParticleMomentum	False	False	10	-30	Individual_Deep_Q	1.0	simple_mlp	True	0.05	2500000	28	True
IndivQLearningParticleDNNOnlyOneHotMoreSeeds2/219_5_19	none		True	-10	False	ParticleMomentum	False	False	10	-30	Individual_Deep_Q	1.0	simple_mlp	True	0.05	2500000	29	True
IndivQLearningParticleDNNOnlyOneHotMoreSeeds2/220_5_20	none		True	-10	False	ParticleMomentum	False	False	10	-30	Individual_Deep_Q	1.0	simple_mlp	True	0.05	2500000	30	True
IndivQLearningParticleDNNOnlyOneHotMoreSeeds2/221_5_21	none		True	-10	False	ParticleMomentum	False	False	10	-30	Individual_Deep_Q	1.0	simple_mlp	True	0.05	2500000	31	True
IndivQLearningParticleDNNOnlyOneHotMoreSeeds2/222_5_22	none		True	-10	False	ParticleMomentum	False	False	10	-30	Individual_Deep_Q	1.0	simple_mlp	True	0.05	2500000	32	True
IndivQLearningParticleDNNOnlyOneHotMoreSeeds2/223_5_23	none		True	-10	False	ParticleMomentum	False	False	10	-30	Individual_Deep_Q	1.0	simple_mlp	True	0.05	2500000	33	True
IndivQLearningParticleDNNOnlyOneHotMoreSeeds2/224_5_24	none		True	-10	False	ParticleMomentum	False	False	10	-30	Individual_Deep_Q	1.0	simple_mlp	True	0.05	2500000	34	True
IndivQLearningParticleDNNOnlyOneHotMoreSeeds2/225_5_25	none		True	-10	False	ParticleMomentum	False	False	10	-30	Individual_Deep_Q	1.0	simple_mlp	True	0.05	2500000	35	True
IndivQLearningParticleDNNOnlyOneHotMoreSeeds2/226_5_26	none		True	-10	False	ParticleMomentum	False	False	10	-30	Individual_Deep_Q	1.0	simple_mlp	True	0.05	2500000	36	True
IndivQLearningParticleDNNOnlyOneHotMoreSeeds2/227_5_27	none		True	-10	False	ParticleMomentum	False	False	10	-30	Individual_Deep_Q	1.0	simple_mlp	True	0.05	2500000	37	True
IndivQLearningParticleDNNOnlyOneHotMoreSeeds2/228_5_28	none		True	-10	False	ParticleMomentum	False	False	10	-30	Individual_Deep_Q	1.0	simple_mlp	True	0.05	2500000	38	True
IndivQLearningParticleDNNOnlyOneHotMoreSeeds2/229_5_29	none		True	-10	False	ParticleMomentum	False	False	10	-30	Individual_Deep_Q	1.0	simple_mlp	True	0.05	2500000	39	True
IndivQLearningParticleDNNOnlyOneHotMoreSeeds2/230_5_30	none		True	-10	False	ParticleMomentum	False	False	10	-30	Individual_Deep_Q	1.0	simple_mlp	True	0.05	2500000	40	True
IndivQLearningParticleDNNOnlyOneHotMoreSeeds2/231_5_31	none		True	-10	False	ParticleMomentum	False	False	10	-30	Individual_Deep_Q	1.0	simple_mlp	True	0.05	2500000	41	True
IndivQLearningParticleDNNOnlyOneHotMoreSeeds2/232_5_32	none		True	-10	False	ParticleMomentum	False	False	10	-30	Individual_Deep_Q	1.0	simple_mlp	True	0.05	2500000	42	True
IndivQLearningParticleDNNOnlyOneHotMoreSeeds2/233_5_33	none		True	-10	False	ParticleMomentum	False	False	10	-30	Individual_Deep_Q	1.0	simple_mlp	True	0.05	2500000	43	True
IndivQLearningParticleDNNOnlyOneHotMoreSeeds2/234_5_34	none		True	-10	False	ParticleMomentum	False	False	10	-30	Individual_Deep_Q	1.0	simple_mlp	True	0.05	2500000	44	True
IndivQLearningParticleDNNOnlyOneHotMoreSeeds2/235_5_35	none		True	-10	False	ParticleMomentum	False	False	10	-30	Individual_Deep_Q	1.0	simple_mlp	True	0.05	2500000	45	True
IndivQLearningParticleDNNOnlyOneHotMoreSeeds2/236_5_36	none		True	-10	False	ParticleMomentum	False	False	10	-30	Individual_Deep_Q	1.0	simple_mlp	True	0.05	2500000	46	True
IndivQLearningParticleDNNOnlyOneHotMoreSeeds2/237_5_37	none		True	-10	False	ParticleMomentum	False	False	10	-30	Individual_Deep_Q	1.0	simple_mlp	True	0.05	2500000	47	True
IndivQLearningParticleDNNOnlyOneHotMoreSeeds2/238_5_38	none		True	-10	False	ParticleMomentum	False	False	10	-30	Individual_Deep_Q	1.0	simple_mlp	True	0.05	2500000	48	True
IndivQLearningParticleDNNOnlyOneHotMoreSeeds2/239_5_39	none		True	-10	False	ParticleMomentum	False	False	10	-30	Individual_Deep_Q	1.0	simple_mlp	True	0.05	2500000	49	True
