# Supplementary material
Source: ML conference proceedings conference paper supplement (https://proceedings.neurips.cc/paper_files/paper/2022/hash/57444e14ecd9e2c8f603b4f012ce3811-Abstract.html)
Supplement: Supplementary file 1 [file 57444e14ecd9e2c8f603b4f012ce3811-Supplemental-Conference.zip › 3410_shield_decentralization_for_sa-Supplementary Material/parallel_configs/IndivQLearningParticleDNNOnlyOneHotMoreSeedsEval.csv]

run_name	shield	shield_specification	punish_unsafe_orig_action	punish_unsafe_orig_action_modifier	randomize_starts	map_type	particle_agents_observe_momentum	particle_terminate_on_collision	particle_world_size	particle_collision_penalty	learner_type	learner_anneal_eps_start	learner_deep_network_model	learner_transform_one_hot	learner_anneal_eps_finish	max_total_steps	seed	skip_training	evaluation_run_name	evaluation_shield	evaluation_shield_specification	learner_evaluation_epsilon
IndivQLearningParticleDNNOnlyOneHotMoreSeeds/0_0_0	slugs_centralized	shields/momentum_shield	True	-10	True	ParticleMomentum	False	False	10	-30	Individual_Deep_Q	1.0	simple_mlp	True	0.05	2500000	10	True	IndivQLearningParticleDNNOnlyOneHotMoreSeeds/0_0_0_slugs_centralized	slugs_centralized	shields/momentum_shield	0.05
IndivQLearningParticleDNNOnlyOneHotMoreSeeds/0_0_0	slugs_centralized	shields/momentum_shield	True	-10	True	ParticleMomentum	False	False	10	-30	Individual_Deep_Q	1.0	simple_mlp	True	0.05	2500000	10	True	IndivQLearningParticleDNNOnlyOneHotMoreSeeds/0_0_0_slugs_decentralized	slugs_decentralized	shields/momentum_shield	0.05
IndivQLearningParticleDNNOnlyOneHotMoreSeeds/0_0_0	slugs_centralized	shields/momentum_shield	True	-10	True	ParticleMomentum	False	False	10	-30	Individual_Deep_Q	1.0	simple_mlp	True	0.05	2500000	10	True	IndivQLearningParticleDNNOnlyOneHotMoreSeeds/0_0_0_none	none		0.05
IndivQLearningParticleDNNOnlyOneHotMoreSeeds/1_0_1	slugs_centralized	shields/momentum_shield	True	-10	True	ParticleMomentum	False	False	10	-30	Individual_Deep_Q	1.0	simple_mlp	True	0.05	2500000	11	True	IndivQLearningParticleDNNOnlyOneHotMoreSeeds/1_0_1_slugs_centralized	slugs_centralized	shields/momentum_shield	0.05
IndivQLearningParticleDNNOnlyOneHotMoreSeeds/1_0_1	slugs_centralized	shields/momentum_shield	True	-10	True	ParticleMomentum	False	False	10	-30	Individual_Deep_Q	1.0	simple_mlp	True	0.05	2500000	11	True	IndivQLearningParticleDNNOnlyOneHotMoreSeeds/1_0_1_slugs_decentralized	slugs_decentralized	shields/momentum_shield	0.05
IndivQLearningParticleDNNOnlyOneHotMoreSeeds/1_0_1	slugs_centralized	shields/momentum_shield	True	-10	True	ParticleMomentum	False	False	10	-30	Individual_Deep_Q	1.0	simple_mlp	True	0.05	2500000	11	True	IndivQLearningParticleDNNOnlyOneHotMoreSeeds/1_0_1_none	none		0.05
IndivQLearningParticleDNNOnlyOneHotMoreSeeds/2_0_2	slugs_centralized	shields/momentum_shield	True	-10	True	ParticleMomentum	False	False	10	-30	Individual_Deep_Q	1.0	simple_mlp	True	0.05	2500000	12	True	IndivQLearningParticleDNNOnlyOneHotMoreSeeds/2_0_2_slugs_centralized	slugs_centralized	shields/momentum_shield	0.05
IndivQLearningParticleDNNOnlyOneHotMoreSeeds/2_0_2	slugs_centralized	shields/momentum_shield	True	-10	True	ParticleMomentum	False	False	10	-30	Individual_Deep_Q	1.0	simple_mlp	True	0.05	2500000	12	True	IndivQLearningParticleDNNOnlyOneHotMoreSeeds/2_0_2_slugs_decentralized	slugs_decentralized	shields/momentum_shield	0.05
IndivQLearningParticleDNNOnlyOneHotMoreSeeds/2_0_2	slugs_centralized	shields/momentum_shield	True	-10	True	ParticleMomentum	False	False	10	-30	Individual_Deep_Q	1.0	simple_mlp	True	0.05	2500000	12	True	IndivQLearningParticleDNNOnlyOneHotMoreSeeds/2_0_2_none	none		0.05
IndivQLearningParticleDNNOnlyOneHotMoreSeeds/3_0_3	slugs_centralized	shields/momentum_shield	True	-10	True	ParticleMomentum	False	False	10	-30	Individual_Deep_Q	1.0	simple_mlp	True	0.05	2500000	13	True	IndivQLearningParticleDNNOnlyOneHotMoreSeeds/3_0_3_slugs_centralized	slugs_centralized	shields/momentum_shield	0.05
IndivQLearningParticleDNNOnlyOneHotMoreSeeds/3_0_3	slugs_centralized	shields/momentum_shield	True	-10	True	ParticleMomentum	False	False	10	-30	Individual_Deep_Q	1.0	simple_mlp	True	0.05	2500000	13	True	IndivQLearningParticleDNNOnlyOneHotMoreSeeds/3_0_3_slugs_decentralized	slugs_decentralized	shields/momentum_shield	0.05
IndivQLearningParticleDNNOnlyOneHotMoreSeeds/3_0_3	slugs_centralized	shields/momentum_shield	True	-10	True	ParticleMomentum	False	False	10	-30	Individual_Deep_Q	1.0	simple_mlp	True	0.05	2500000	13	True	IndivQLearningParticleDNNOnlyOneHotMoreSeeds/3_0_3_none	none		0.05
IndivQLearningParticleDNNOnlyOneHotMoreSeeds/4_0_4	slugs_centralized	shields/momentum_shield	True	-10	True	ParticleMomentum	False	False	10	-30	Individual_Deep_Q	1.0	simple_mlp	True	0.05	2500000	14	True	IndivQLearningParticleDNNOnlyOneHotMoreSeeds/4_0_4_slugs_centralized	slugs_centralized	shields/momentum_shield	0.05
IndivQLearningParticleDNNOnlyOneHotMoreSeeds/4_0_4	slugs_centralized	shields/momentum_shield	True	-10	True	ParticleMomentum	False	False	10	-30	Individual_Deep_Q	1.0	simple_mlp	True	0.05	2500000	14	True	IndivQLearningParticleDNNOnlyOneHotMoreSeeds/4_0_4_slugs_decentralized	slugs_decentralized	shields/momentum_shield	0.05
IndivQLearningParticleDNNOnlyOneHotMoreSeeds/4_0_4	slugs_centralized	shields/momentum_shield	True	-10	True	ParticleMomentum	False	False	10	-30	Individual_Deep_Q	1.0	simple_mlp	True	0.05	2500000	14	True	IndivQLearningParticleDNNOnlyOneHotMoreSeeds/4_0_4_none	none		0.05
IndivQLearningParticleDNNOnlyOneHotMoreSeeds/5_0_5	slugs_centralized	shields/momentum_shield	True	-10	True	ParticleMomentum	False	False	10	-30	Individual_Deep_Q	1.0	simple_mlp	True	0.05	2500000	15	True	IndivQLearningParticleDNNOnlyOneHotMoreSeeds/5_0_5_slugs_centralized	slugs_centralized	shields/momentum_shield	0.05
IndivQLearningParticleDNNOnlyOneHotMoreSeeds/5_0_5	slugs_centralized	shields/momentum_shield	True	-10	True	ParticleMomentum	False	False	10	-30	Individual_Deep_Q	1.0	simple_mlp	True	0.05	2500000	15	True	IndivQLearningParticleDNNOnlyOneHotMoreSeeds/5_0_5_slugs_decentralized	slugs_decentralized	shields/momentum_shield	0.05
IndivQLearningParticleDNNOnlyOneHotMoreSeeds/5_0_5	slugs_centralized	shields/momentum_shield	True	-10	True	ParticleMomentum	False	False	10	-30	Individual_Deep_Q	1.0	simple_mlp	True	0.05	2500000	15	True	IndivQLearningParticleDNNOnlyOneHotMoreSeeds/5_0_5_none	none		0.05
IndivQLearningParticleDNNOnlyOneHotMoreSeeds/6_0_6	slugs_centralized	shields/momentum_shield	True	-10	True	ParticleMomentum	False	False	10	-30	Individual_Deep_Q	1.0	simple_mlp	True	0.05	2500000	16	True	IndivQLearningParticleDNNOnlyOneHotMoreSeeds/6_0_6_slugs_centralized	slugs_centralized	shields/momentum_shield	0.05
IndivQLearningParticleDNNOnlyOneHotMoreSeeds/6_0_6	slugs_centralized	shields/momentum_shield	True	-10	True	ParticleMomentum	False	False	10	-30	Individual_Deep_Q	1.0	simple_mlp	True	0.05	2500000	16	True	IndivQLearningParticleDNNOnlyOneHotMoreSeeds/6_0_6_slugs_decentralized	slugs_decentralized	shields/momentum_shield	0.05
IndivQLearningParticleDNNOnlyOneHotMoreSeeds/6_0_6	slugs_centralized	shields/momentum_shield	True	-10	True	ParticleMomentum	False	False	10	-30	Individual_Deep_Q	1.0	simple_mlp	True	0.05	2500000	16	True	IndivQLearningParticleDNNOnlyOneHotMoreSeeds/6_0_6_none	none		0.05
IndivQLearningParticleDNNOnlyOneHotMoreSeeds/7_0_7	slugs_centralized	shields/momentum_shield	True	-10	True	ParticleMomentum	False	False	10	-30	Individual_Deep_Q	1.0	simple_mlp	True	0.05	2500000	17	True	IndivQLearningParticleDNNOnlyOneHotMoreSeeds/7_0_7_slugs_centralized	slugs_centralized	shields/momentum_shield	0.05
IndivQLearningParticleDNNOnlyOneHotMoreSeeds/7_0_7	slugs_centralized	shields/momentum_shield	True	-10	True	ParticleMomentum	False	False	10	-30	Individual_Deep_Q	1.0	simple_mlp	True	0.05	2500000	17	True	IndivQLearningParticleDNNOnlyOneHotMoreSeeds/7_0_7_slugs_decentralized	slugs_decentralized	shields/momentum_shield	0.05
IndivQLearningParticleDNNOnlyOneHotMoreSeeds/7_0_7	slugs_centralized	shields/momentum_shield	True	-10	True	ParticleMomentum	False	False	10	-30	Individual_Deep_Q	1.0	simple_mlp	True	0.05	2500000	17	True	IndivQLearningParticleDNNOnlyOneHotMoreSeeds/7_0_7_none	none		0.05
IndivQLearningParticleDNNOnlyOneHotMoreSeeds/8_0_8	slugs_centralized	shields/momentum_shield	True	-10	True	ParticleMomentum	False	False	10	-30	Individual_Deep_Q	1.0	simple_mlp	True	0.05	2500000	18	True	IndivQLearningParticleDNNOnlyOneHotMoreSeeds/8_0_8_slugs_centralized	slugs_centralized	shields/momentum_shield	0.05
IndivQLearningParticleDNNOnlyOneHotMoreSeeds/8_0_8	slugs_centralized	shields/momentum_shield	True	-10	True	ParticleMomentum	False	False	10	-30	Individual_Deep_Q	1.0	simple_mlp	True	0.05	2500000	18	True	IndivQLearningParticleDNNOnlyOneHotMoreSeeds/8_0_8_slugs_decentralized	slugs_decentralized	shields/momentum_shield	0.05
IndivQLearningParticleDNNOnlyOneHotMoreSeeds/8_0_8	slugs_centralized	shields/momentum_shield	True	-10	True	ParticleMomentum	False	False	10	-30	Individual_Deep_Q	1.0	simple_mlp	True	0.05	2500000	18	True	IndivQLearningParticleDNNOnlyOneHotMoreSeeds/8_0_8_none	none		0.05
IndivQLearningParticleDNNOnlyOneHotMoreSeeds/9_0_9	slugs_centralized	shields/momentum_shield	True	-10	True	ParticleMomentum	False	False	10	-30	Individual_Deep_Q	1.0	simple_mlp	True	0.05	2500000	19	True	IndivQLearningParticleDNNOnlyOneHotMoreSeeds/9_0_9_slugs_centralized	slugs_centralized	shields/momentum_shield	0.05
IndivQLearningParticleDNNOnlyOneHotMoreSeeds/9_0_9	slugs_centralized	shields/momentum_shield	True	-10	True	ParticleMomentum	False	False	10	-30	Individual_Deep_Q	1.0	simple_mlp	True	0.05	2500000	19	True	IndivQLearningParticleDNNOnlyOneHotMoreSeeds/9_0_9_slugs_decentralized	slugs_decentralized	shields/momentum_shield	0.05
IndivQLearningParticleDNNOnlyOneHotMoreSeeds/9_0_9	slugs_centralized	shields/momentum_shield	True	-10	True	ParticleMomentum	False	False	10	-30	Individual_Deep_Q	1.0	simple_mlp	True	0.05	2500000	19	True	IndivQLearningParticleDNNOnlyOneHotMoreSeeds/9_0_9_none	none		0.05
IndivQLearningParticleDNNOnlyOneHotMoreSeeds/10_0_10	slugs_centralized	shields/momentum_shield	True	-10	True	ParticleMomentum	False	False	10	-30	Individual_Deep_Q	1.0	simple_mlp	True	0.05	2500000	20	True	IndivQLearningParticleDNNOnlyOneHotMoreSeeds/10_0_10_slugs_centralized	slugs_centralized	shields/momentum_shield	0.05
IndivQLearningParticleDNNOnlyOneHotMoreSeeds/10_0_10	slugs_centralized	shields/momentum_shield	True	-10	True	ParticleMomentum	False	False	10	-30	Individual_Deep_Q	1.0	simple_mlp	True	0.05	2500000	20	True	IndivQLearningParticleDNNOnlyOneHotMoreSeeds/10_0_10_slugs_decentralized	slugs_decentralized	shields/momentum_shield	0.05
IndivQLearningParticleDNNOnlyOneHotMoreSeeds/10_0_10	slugs_centralized	shields/momentum_shield	True	-10	True	ParticleMomentum	False	False	10	-30	Individual_Deep_Q	1.0	simple_mlp	True	0.05	2500000	20	True	IndivQLearningParticleDNNOnlyOneHotMoreSeeds/10_0_10_none	none		0.05
IndivQLearningParticleDNNOnlyOneHotMoreSeeds/11_0_11	slugs_centralized	shields/momentum_shield	True	-10	True	ParticleMomentum	False	False	10	-30	Individual_Deep_Q	1.0	simple_mlp	True	0.05	2500000	21	True	IndivQLearningParticleDNNOnlyOneHotMoreSeeds/11_0_11_slugs_centralized	slugs_centralized	shields/momentum_shield	0.05
IndivQLearningParticleDNNOnlyOneHotMoreSeeds/11_0_11	slugs_centralized	shields/momentum_shield	True	-10	True	ParticleMomentum	False	False	10	-30	Individual_Deep_Q	1.0	simple_mlp	True	0.05	2500000	21	True	IndivQLearningParticleDNNOnlyOneHotMoreSeeds/11_0_11_slugs_decentralized	slugs_decentralized	shields/momentum_shield	0.05
IndivQLearningParticleDNNOnlyOneHotMoreSeeds/11_0_11	slugs_centralized	shields/momentum_shield	True	-10	True	ParticleMomentum	False	False	10	-30	Individual_Deep_Q	1.0	simple_mlp	True	0.05	2500000	21	True	IndivQLearningParticleDNNOnlyOneHotMoreSeeds/11_0_11_none	none		0.05
IndivQLearningParticleDNNOnlyOneHotMoreSeeds/12_0_12	slugs_centralized	shields/momentum_shield	True	-10	True	ParticleMomentum	False	False	10	-30	Individual_Deep_Q	1.0	simple_mlp	True	0.05	2500000	22	True	IndivQLearningParticleDNNOnlyOneHotMoreSeeds/12_0_12_slugs_centralized	slugs_centralized	shields/momentum_shield	0.05
IndivQLearningParticleDNNOnlyOneHotMoreSeeds/12_0_12	slugs_centralized	shields/momentum_shield	True	-10	True	ParticleMomentum	False	False	10	-30	Individual_Deep_Q	1.0	simple_mlp	True	0.05	2500000	22	True	IndivQLearningParticleDNNOnlyOneHotMoreSeeds/12_0_12_slugs_decentralized	slugs_decentralized	shields/momentum_shield	0.05
IndivQLearningParticleDNNOnlyOneHotMoreSeeds/12_0_12	slugs_centralized	shields/momentum_shield	True	-10	True	ParticleMomentum	False	False	10	-30	Individual_Deep_Q	1.0	simple_mlp	True	0.05	2500000	22	True	IndivQLearningParticleDNNOnlyOneHotMoreSeeds/12_0_12_none	none		0.05
IndivQLearningParticleDNNOnlyOneHotMoreSeeds/13_0_13	slugs_centralized	shields/momentum_shield	True	-10	True	ParticleMomentum	False	False	10	-30	Individual_Deep_Q	1.0	simple_mlp	True	0.05	2500000	23	True	IndivQLearningParticleDNNOnlyOneHotMoreSeeds/13_0_13_slugs_centralized	slugs_centralized	shields/momentum_shield	0.05
IndivQLearningParticleDNNOnlyOneHotMoreSeeds/13_0_13	slugs_centralized	shields/momentum_shield	True	-10	True	ParticleMomentum	False	False	10	-30	Individual_Deep_Q	1.0	simple_mlp	True	0.05	2500000	23	True	IndivQLearningParticleDNNOnlyOneHotMoreSeeds/13_0_13_slugs_decentralized	slugs_decentralized	shields/momentum_shield	0.05
IndivQLearningParticleDNNOnlyOneHotMoreSeeds/13_0_13	slugs_centralized	shields/momentum_shield	True	-10	True	ParticleMomentum	False	False	10	-30	Individual_Deep_Q	1.0	simple_mlp	True	0.05	2500000	23	True	IndivQLearningParticleDNNOnlyOneHotMoreSeeds/13_0_13_none	none		0.05
IndivQLearningParticleDNNOnlyOneHotMoreSeeds/14_0_14	slugs_centralized	shields/momentum_shield	True	-10	True	ParticleMomentum	False	False	10	-30	Individual_Deep_Q	1.0	simple_mlp	True	0.05	2500000	24	True	IndivQLearningParticleDNNOnlyOneHotMoreSeeds/14_0_14_slugs_centralized	slugs_centralized	shields/momentum_shield	0.05
IndivQLearningParticleDNNOnlyOneHotMoreSeeds/14_0_14	slugs_centralized	shields/momentum_shield	True	-10	True	ParticleMomentum	False	False	10	-30	Individual_Deep_Q	1.0	simple_mlp	True	0.05	2500000	24	True	IndivQLearningParticleDNNOnlyOneHotMoreSeeds/14_0_14_slugs_decentralized	slugs_decentralized	shields/momentum_shield	0.05
IndivQLearningParticleDNNOnlyOneHotMoreSeeds/14_0_14	slugs_centralized	shields/momentum_shield	True	-10	True	ParticleMomentum	False	False	10	-30	Individual_Deep_Q	1.0	simple_mlp	True	0.05	2500000	24	True	IndivQLearningParticleDNNOnlyOneHotMoreSeeds/14_0_14_none	none		0.05
IndivQLearningParticleDNNOnlyOneHotMoreSeeds/15_0_15	slugs_centralized	shields/momentum_shield	True	-10	True	ParticleMomentum	False	False	10	-30	Individual_Deep_Q	1.0	simple_mlp	True	0.05	2500000	25	True	IndivQLearningParticleDNNOnlyOneHotMoreSeeds/15_0_15_slugs_centralized	slugs_centralized	shields/momentum_shield	0.05
IndivQLearningParticleDNNOnlyOneHotMoreSeeds/15_0_15	slugs_centralized	shields/momentum_shield	True	-10	True	ParticleMomentum	False	False	10	-30	Individual_Deep_Q	1.0	simple_mlp	True	0.05	2500000	25	True	IndivQLearningParticleDNNOnlyOneHotMoreSeeds/15_0_15_slugs_decentralized	slugs_decentralized	shields/momentum_shield	0.05
IndivQLearningParticleDNNOnlyOneHotMoreSeeds/15_0_15	slugs_centralized	shields/momentum_shield	True	-10	True	ParticleMomentum	False	False	10	-30	Individual_Deep_Q	1.0	simple_mlp	True	0.05	2500000	25	True	IndivQLearningParticleDNNOnlyOneHotMoreSeeds/15_0_15_none	none		0.05
IndivQLearningParticleDNNOnlyOneHotMoreSeeds/16_0_16	slugs_centralized	shields/momentum_shield	True	-10	True	ParticleMomentum	False	False	10	-30	Individual_Deep_Q	1.0	simple_mlp	True	0.05	2500000	26	True	IndivQLearningParticleDNNOnlyOneHotMoreSeeds/16_0_16_slugs_centralized	slugs_centralized	shields/momentum_shield	0.05
IndivQLearningParticleDNNOnlyOneHotMoreSeeds/16_0_16	slugs_centralized	shields/momentum_shield	True	-10	True	ParticleMomentum	False	False	10	-30	Individual_Deep_Q	1.0	simple_mlp	True	0.05	2500000	26	True	IndivQLearningParticleDNNOnlyOneHotMoreSeeds/16_0_16_slugs_decentralized	slugs_decentralized	shields/momentum_shield	0.05
IndivQLearningParticleDNNOnlyOneHotMoreSeeds/16_0_16	slugs_centralized	shields/momentum_shield	True	-10	True	ParticleMomentum	False	False	10	-30	Individual_Deep_Q	1.0	simple_mlp	True	0.05	2500000	26	True	IndivQLearningParticleDNNOnlyOneHotMoreSeeds/16_0_16_none	none		0.05
IndivQLearningParticleDNNOnlyOneHotMoreSeeds/17_0_17	slugs_centralized	shields/momentum_shield	True	-10	True	ParticleMomentum	False	False	10	-30	Individual_Deep_Q	1.0	simple_mlp	True	0.05	2500000	27	True	IndivQLearningParticleDNNOnlyOneHotMoreSeeds/17_0_17_slugs_centralized	slugs_centralized	shields/momentum_shield	0.05
IndivQLearningParticleDNNOnlyOneHotMoreSeeds/17_0_17	slugs_centralized	shields/momentum_shield	True	-10	True	ParticleMomentum	False	False	10	-30	Individual_Deep_Q	1.0	simple_mlp	True	0.05	2500000	27	True	IndivQLearningParticleDNNOnlyOneHotMoreSeeds/17_0_17_slugs_decentralized	slugs_decentralized	shields/momentum_shield	0.05
IndivQLearningParticleDNNOnlyOneHotMoreSeeds/17_0_17	slugs_centralized	shields/momentum_shield	True	-10	True	ParticleMomentum	False	False	10	-30	Individual_Deep_Q	1.0	simple_mlp	True	0.05	2500000	27	True	IndivQLearningParticleDNNOnlyOneHotMoreSeeds/17_0_17_none	none		0.05
IndivQLearningParticleDNNOnlyOneHotMoreSeeds/18_0_18	slugs_centralized	shields/momentum_shield	True	-10	True	ParticleMomentum	False	False	10	-30	Individual_Deep_Q	1.0	simple_mlp	True	0.05	2500000	28	True	IndivQLearningParticleDNNOnlyOneHotMoreSeeds/18_0_18_slugs_centralized	slugs_centralized	shields/momentum_shield	0.05
IndivQLearningParticleDNNOnlyOneHotMoreSeeds/18_0_18	slugs_centralized	shields/momentum_shield	True	-10	True	ParticleMomentum	False	False	10	-30	Individual_Deep_Q	1.0	simple_mlp	True	0.05	2500000	28	True	IndivQLearningParticleDNNOnlyOneHotMoreSeeds/18_0_18_slugs_decentralized	slugs_decentralized	shields/momentum_shield	0.05
IndivQLearningParticleDNNOnlyOneHotMoreSeeds/18_0_18	slugs_centralized	shields/momentum_shield	True	-10	True	ParticleMomentum	False	False	10	-30	Individual_Deep_Q	1.0	simple_mlp	True	0.05	2500000	28	True	IndivQLearningParticleDNNOnlyOneHotMoreSeeds/18_0_18_none	none		0.05
IndivQLearningParticleDNNOnlyOneHotMoreSeeds/19_0_19	slugs_centralized	shields/momentum_shield	True	-10	True	ParticleMomentum	False	False	10	-30	Individual_Deep_Q	1.0	simple_mlp	True	0.05	2500000	29	True	IndivQLearningParticleDNNOnlyOneHotMoreSeeds/19_0_19_slugs_centralized	slugs_centralized	shields/momentum_shield	0.05
IndivQLearningParticleDNNOnlyOneHotMoreSeeds/19_0_19	slugs_centralized	shields/momentum_shield	True	-10	True	ParticleMomentum	False	False	10	-30	Individual_Deep_Q	1.0	simple_mlp	True	0.05	2500000	29	True	IndivQLearningParticleDNNOnlyOneHotMoreSeeds/19_0_19_slugs_decentralized	slugs_decentralized	shields/momentum_shield	0.05
IndivQLearningParticleDNNOnlyOneHotMoreSeeds/19_0_19	slugs_centralized	shields/momentum_shield	True	-10	True	ParticleMomentum	False	False	10	-30	Individual_Deep_Q	1.0	simple_mlp	True	0.05	2500000	29	True	IndivQLearningParticleDNNOnlyOneHotMoreSeeds/19_0_19_none	none		0.05
IndivQLearningParticleDNNOnlyOneHotMoreSeeds/20_0_20	slugs_centralized	shields/momentum_shield	True	-10	True	ParticleMomentum	False	False	10	-30	Individual_Deep_Q	1.0	simple_mlp	True	0.05	2500000	30	True	IndivQLearningParticleDNNOnlyOneHotMoreSeeds/20_0_20_slugs_centralized	slugs_centralized	shields/momentum_shield	0.05
IndivQLearningParticleDNNOnlyOneHotMoreSeeds/20_0_20	slugs_centralized	shields/momentum_shield	True	-10	True	ParticleMomentum	False	False	10	-30	Individual_Deep_Q	1.0	simple_mlp	True	0.05	2500000	30	True	IndivQLearningParticleDNNOnlyOneHotMoreSeeds/20_0_20_slugs_decentralized	slugs_decentralized	shields/momentum_shield	0.05
IndivQLearningParticleDNNOnlyOneHotMoreSeeds/20_0_20	slugs_centralized	shields/momentum_shield	True	-10	True	ParticleMomentum	False	False	10	-30	Individual_Deep_Q	1.0	simple_mlp	True	0.05	2500000	30	True	IndivQLearningParticleDNNOnlyOneHotMoreSeeds/20_0_20_none	none		0.05
IndivQLearningParticleDNNOnlyOneHotMoreSeeds/21_0_21	slugs_centralized	shields/momentum_shield	True	-10	True	ParticleMomentum	False	False	10	-30	Individual_Deep_Q	1.0	simple_mlp	True	0.05	2500000	31	True	IndivQLearningParticleDNNOnlyOneHotMoreSeeds/21_0_21_slugs_centralized	slugs_centralized	shields/momentum_shield	0.05
IndivQLearningParticleDNNOnlyOneHotMoreSeeds/21_0_21	slugs_centralized	shields/momentum_shield	True	-10	True	ParticleMomentum	False	False	10	-30	Individual_Deep_Q	1.0	simple_mlp	True	0.05	2500000	31	True	IndivQLearningParticleDNNOnlyOneHotMoreSeeds/21_0_21_slugs_decentralized	slugs_decentralized	shields/momentum_shield	0.05
IndivQLearningParticleDNNOnlyOneHotMoreSeeds/21_0_21	slugs_centralized	shields/momentum_shield	True	-10	True	ParticleMomentum	False	False	10	-30	Individual_Deep_Q	1.0	simple_mlp	True	0.05	2500000	31	True	IndivQLearningParticleDNNOnlyOneHotMoreSeeds/21_0_21_none	none		0.05
IndivQLearningParticleDNNOnlyOneHotMoreSeeds/22_0_22	slugs_centralized	shields/momentum_shield	True	-10	True	ParticleMomentum	False	False	10	-30	Individual_Deep_Q	1.0	simple_mlp	True	0.05	2500000	32	True	IndivQLearningParticleDNNOnlyOneHotMoreSeeds/22_0_22_slugs_centralized	slugs_centralized	shields/momentum_shield	0.05
IndivQLearningParticleDNNOnlyOneHotMoreSeeds/22_0_22	slugs_centralized	shields/momentum_shield	True	-10	True	ParticleMomentum	False	False	10	-30	Individual_Deep_Q	1.0	simple_mlp	True	0.05	2500000	32	True	IndivQLearningParticleDNNOnlyOneHotMoreSeeds/22_0_22_slugs_decentralized	slugs_decentralized	shields/momentum_shield	0.05
IndivQLearningParticleDNNOnlyOneHotMoreSeeds/22_0_22	slugs_centralized	shields/momentum_shield	True	-10	True	ParticleMomentum	False	False	10	-30	Individual_Deep_Q	1.0	simple_mlp	True	0.05	2500000	32	True	IndivQLearningParticleDNNOnlyOneHotMoreSeeds/22_0_22_none	none		0.05
IndivQLearningParticleDNNOnlyOneHotMoreSeeds/23_0_23	slugs_centralized	shields/momentum_shield	True	-10	True	ParticleMomentum	False	False	10	-30	Individual_Deep_Q	1.0	simple_mlp	True	0.05	2500000	33	True	IndivQLearningParticleDNNOnlyOneHotMoreSeeds/23_0_23_slugs_centralized	slugs_centralized	shields/momentum_shield	0.05
IndivQLearningParticleDNNOnlyOneHotMoreSeeds/23_0_23	slugs_centralized	shields/momentum_shield	True	-10	True	ParticleMomentum	False	False	10	-30	Individual_Deep_Q	1.0	simple_mlp	True	0.05	2500000	33	True	IndivQLearningParticleDNNOnlyOneHotMoreSeeds/23_0_23_slugs_decentralized	slugs_decentralized	shields/momentum_shield	0.05
IndivQLearningParticleDNNOnlyOneHotMoreSeeds/23_0_23	slugs_centralized	shields/momentum_shield	True	-10	True	ParticleMomentum	False	False	10	-30	Individual_Deep_Q	1.0	simple_mlp	True	0.05	2500000	33	True	IndivQLearningParticleDNNOnlyOneHotMoreSeeds/23_0_23_none	none		0.05
IndivQLearningParticleDNNOnlyOneHotMoreSeeds/24_0_24	slugs_centralized	shields/momentum_shield	True	-10	True	ParticleMomentum	False	False	10	-30	Individual_Deep_Q	1.0	simple_mlp	True	0.05	2500000	34	True	IndivQLearningParticleDNNOnlyOneHotMoreSeeds/24_0_24_slugs_centralized	slugs_centralized	shields/momentum_shield	0.05
IndivQLearningParticleDNNOnlyOneHotMoreSeeds/24_0_24	slugs_centralized	shields/momentum_shield	True	-10	True	ParticleMomentum	False	False	10	-30	Individual_Deep_Q	1.0	simple_mlp	True	0.05	2500000	34	True	IndivQLearningParticleDNNOnlyOneHotMoreSeeds/24_0_24_slugs_decentralized	slugs_decentralized	shields/momentum_shield	0.05
IndivQLearningParticleDNNOnlyOneHotMoreSeeds/24_0_24	slugs_centralized	shields/momentum_shield	True	-10	True	ParticleMomentum	False	False	10	-30	Individual_Deep_Q	1.0	simple_mlp	True	0.05	2500000	34	True	IndivQLearningParticleDNNOnlyOneHotMoreSeeds/24_0_24_none	none		0.05
IndivQLearningParticleDNNOnlyOneHotMoreSeeds/25_0_25	slugs_centralized	shields/momentum_shield	True	-10	True	ParticleMomentum	False	False	10	-30	Individual_Deep_Q	1.0	simple_mlp	True	0.05	2500000	35	True	IndivQLearningParticleDNNOnlyOneHotMoreSeeds/25_0_25_slugs_centralized	slugs_centralized	shields/momentum_shield	0.05
IndivQLearningParticleDNNOnlyOneHotMoreSeeds/25_0_25	slugs_centralized	shields/momentum_shield	True	-10	True	ParticleMomentum	False	False	10	-30	Individual_Deep_Q	1.0	simple_mlp	True	0.05	2500000	35	True	IndivQLearningParticleDNNOnlyOneHotMoreSeeds/25_0_25_slugs_decentralized	slugs_decentralized	shields/momentum_shield	0.05
IndivQLearningParticleDNNOnlyOneHotMoreSeeds/25_0_25	slugs_centralized	shields/momentum_shield	True	-10	True	ParticleMomentum	False	False	10	-30	Individual_Deep_Q	1.0	simple_mlp	True	0.05	2500000	35	True	IndivQLearningParticleDNNOnlyOneHotMoreSeeds/25_0_25_none	none		0.05
IndivQLearningParticleDNNOnlyOneHotMoreSeeds/26_0_26	slugs_centralized	shields/momentum_shield	True	-10	True	ParticleMomentum	False	False	10	-30	Individual_Deep_Q	1.0	simple_mlp	True	0.05	2500000	36	True	IndivQLearningParticleDNNOnlyOneHotMoreSeeds/26_0_26_slugs_centralized	slugs_centralized	shields/momentum_shield	0.05
IndivQLearningParticleDNNOnlyOneHotMoreSeeds/26_0_26	slugs_centralized	shields/momentum_shield	True	-10	True	ParticleMomentum	False	False	10	-30	Individual_Deep_Q	1.0	simple_mlp	True	0.05	2500000	36	True	IndivQLearningParticleDNNOnlyOneHotMoreSeeds/26_0_26_slugs_decentralized	slugs_decentralized	shields/momentum_shield	0.05
IndivQLearningParticleDNNOnlyOneHotMoreSeeds/26_0_26	slugs_centralized	shields/momentum_shield	True	-10	True	ParticleMomentum	False	False	10	-30	Individual_Deep_Q	1.0	simple_mlp	True	0.05	2500000	36	True	IndivQLearningParticleDNNOnlyOneHotMoreSeeds/26_0_26_none	none		0.05
IndivQLearningParticleDNNOnlyOneHotMoreSeeds/27_0_27	slugs_centralized	shields/momentum_shield	True	-10	True	ParticleMomentum	False	False	10	-30	Individual_Deep_Q	1.0	simple_mlp	True	0.05	2500000	37	True	IndivQLearningParticleDNNOnlyOneHotMoreSeeds/27_0_27_slugs_centralized	slugs_centralized	shields/momentum_shield	0.05
IndivQLearningParticleDNNOnlyOneHotMoreSeeds/27_0_27	slugs_centralized	shields/momentum_shield	True	-10	True	ParticleMomentum	False	False	10	-30	Individual_Deep_Q	1.0	simple_mlp	True	0.05	2500000	37	True	IndivQLearningParticleDNNOnlyOneHotMoreSeeds/27_0_27_slugs_decentralized	slugs_decentralized	shields/momentum_shield	0.05
IndivQLearningParticleDNNOnlyOneHotMoreSeeds/27_0_27	slugs_centralized	shields/momentum_shield	True	-10	True	ParticleMomentum	False	False	10	-30	Individual_Deep_Q	1.0	simple_mlp	True	0.05	2500000	37	True	IndivQLearningParticleDNNOnlyOneHotMoreSeeds/27_0_27_none	none		0.05
IndivQLearningParticleDNNOnlyOneHotMoreSeeds/28_0_28	slugs_centralized	shields/momentum_shield	True	-10	True	ParticleMomentum	False	False	10	-30	Individual_Deep_Q	1.0	simple_mlp	True	0.05	2500000	38	True	IndivQLearningParticleDNNOnlyOneHotMoreSeeds/28_0_28_slugs_centralized	slugs_centralized	shields/momentum_shield	0.05
IndivQLearningParticleDNNOnlyOneHotMoreSeeds/28_0_28	slugs_centralized	shields/momentum_shield	True	-10	True	ParticleMomentum	False	False	10	-30	Individual_Deep_Q	1.0	simple_mlp	True	0.05	2500000	38	True	IndivQLearningParticleDNNOnlyOneHotMoreSeeds/28_0_28_slugs_decentralized	slugs_decentralized	shields/momentum_shield	0.05
IndivQLearningParticleDNNOnlyOneHotMoreSeeds/28_0_28	slugs_centralized	shields/momentum_shield	True	-10	True	ParticleMomentum	False	False	10	-30	Individual_Deep_Q	1.0	simple_mlp	True	0.05	2500000	38	True	IndivQLearningParticleDNNOnlyOneHotMoreSeeds/28_0_28_none	none		0.05
IndivQLearningParticleDNNOnlyOneHotMoreSeeds/29_0_29	slugs_centralized	shields/momentum_shield	True	-10	True	ParticleMomentum	False	False	10	-30	Individual_Deep_Q	1.0	simple_mlp	True	0.05	2500000	39	True	IndivQLearningParticleDNNOnlyOneHotMoreSeeds/29_0_29_slugs_centralized	slugs_centralized	shields/momentum_shield	0.05
IndivQLearningParticleDNNOnlyOneHotMoreSeeds/29_0_29	slugs_centralized	shields/momentum_shield	True	-10	True	ParticleMomentum	False	False	10	-30	Individual_Deep_Q	1.0	simple_mlp	True	0.05	2500000	39	True	IndivQLearningParticleDNNOnlyOneHotMoreSeeds/29_0_29_slugs_decentralized	slugs_decentralized	shields/momentum_shield	0.05
IndivQLearningParticleDNNOnlyOneHotMoreSeeds/29_0_29	slugs_centralized	shields/momentum_shield	True	-10	True	ParticleMomentum	False	False	10	-30	Individual_Deep_Q	1.0	simple_mlp	True	0.05	2500000	39	True	IndivQLearningParticleDNNOnlyOneHotMoreSeeds/29_0_29_none	none		0.05
IndivQLearningParticleDNNOnlyOneHotMoreSeeds/30_0_30	slugs_centralized	shields/momentum_shield	True	-10	True	ParticleMomentum	False	False	10	-30	Individual_Deep_Q	1.0	simple_mlp	True	0.05	2500000	40	True	IndivQLearningParticleDNNOnlyOneHotMoreSeeds/30_0_30_slugs_centralized	slugs_centralized	shields/momentum_shield	0.05
IndivQLearningParticleDNNOnlyOneHotMoreSeeds/30_0_30	slugs_centralized	shields/momentum_shield	True	-10	True	ParticleMomentum	False	False	10	-30	Individual_Deep_Q	1.0	simple_mlp	True	0.05	2500000	40	True	IndivQLearningParticleDNNOnlyOneHotMoreSeeds/30_0_30_slugs_decentralized	slugs_decentralized	shields/momentum_shield	0.05
IndivQLearningParticleDNNOnlyOneHotMoreSeeds/30_0_30	slugs_centralized	shields/momentum_shield	True	-10	True	ParticleMomentum	False	False	10	-30	Individual_Deep_Q	1.0	simple_mlp	True	0.05	2500000	40	True	IndivQLearningParticleDNNOnlyOneHotMoreSeeds/30_0_30_none	none		0.05
IndivQLearningParticleDNNOnlyOneHotMoreSeeds/31_0_31	slugs_centralized	shields/momentum_shield	True	-10	True	ParticleMomentum	False	False	10	-30	Individual_Deep_Q	1.0	simple_mlp	True	0.05	2500000	41	True	IndivQLearningParticleDNNOnlyOneHotMoreSeeds/31_0_31_slugs_centralized	slugs_centralized	shields/momentum_shield	0.05
IndivQLearningParticleDNNOnlyOneHotMoreSeeds/31_0_31	slugs_centralized	shields/momentum_shield	True	-10	True	ParticleMomentum	False	False	10	-30	Individual_Deep_Q	1.0	simple_mlp	True	0.05	2500000	41	True	IndivQLearningParticleDNNOnlyOneHotMoreSeeds/31_0_31_slugs_decentralized	slugs_decentralized	shields/momentum_shield	0.05
IndivQLearningParticleDNNOnlyOneHotMoreSeeds/31_0_31	slugs_centralized	shields/momentum_shield	True	-10	True	ParticleMomentum	False	False	10	-30	Individual_Deep_Q	1.0	simple_mlp	True	0.05	2500000	41	True	IndivQLearningParticleDNNOnlyOneHotMoreSeeds/31_0_31_none	none		0.05
IndivQLearningParticleDNNOnlyOneHotMoreSeeds/32_0_32	slugs_centralized	shields/momentum_shield	True	-10	True	ParticleMomentum	False	False	10	-30	Individual_Deep_Q	1.0	simple_mlp	True	0.05	2500000	42	True	IndivQLearningParticleDNNOnlyOneHotMoreSeeds/32_0_32_slugs_centralized	slugs_centralized	shields/momentum_shield	0.05
IndivQLearningParticleDNNOnlyOneHotMoreSeeds/32_0_32	slugs_centralized	shields/momentum_shield	True	-10	True	ParticleMomentum	False	False	10	-30	Individual_Deep_Q	1.0	simple_mlp	True	0.05	2500000	42	True	IndivQLearningParticleDNNOnlyOneHotMoreSeeds/32_0_32_slugs_decentralized	slugs_decentralized	shields/momentum_shield	0.05
IndivQLearningParticleDNNOnlyOneHotMoreSeeds/32_0_32	slugs_centralized	shields/momentum_shield	True	-10	True	ParticleMomentum	False	False	10	-30	Individual_Deep_Q	1.0	simple_mlp	True	0.05	2500000	42	True	IndivQLearningParticleDNNOnlyOneHotMoreSeeds/32_0_32_none	none		0.05
IndivQLearningParticleDNNOnlyOneHotMoreSeeds/33_0_33	slugs_centralized	shields/momentum_shield	True	-10	True	ParticleMomentum	False	False	10	-30	Individual_Deep_Q	1.0	simple_mlp	True	0.05	2500000	43	True	IndivQLearningParticleDNNOnlyOneHotMoreSeeds/33_0_33_slugs_centralized	slugs_centralized	shields/momentum_shield	0.05
IndivQLearningParticleDNNOnlyOneHotMoreSeeds/33_0_33	slugs_centralized	shields/momentum_shield	True	-10	True	ParticleMomentum	False	False	10	-30	Individual_Deep_Q	1.0	simple_mlp	True	0.05	2500000	43	True	IndivQLearningParticleDNNOnlyOneHotMoreSeeds/33_0_33_slugs_decentralized	slugs_decentralized	shields/momentum_shield	0.05
IndivQLearningParticleDNNOnlyOneHotMoreSeeds/33_0_33	slugs_centralized	shields/momentum_shield	True	-10	True	ParticleMomentum	False	False	10	-30	Individual_Deep_Q	1.0	simple_mlp	True	0.05	2500000	43	True	IndivQLearningParticleDNNOnlyOneHotMoreSeeds/33_0_33_none	none		0.05
IndivQLearningParticleDNNOnlyOneHotMoreSeeds/34_0_34	slugs_centralized	shields/momentum_shield	True	-10	True	ParticleMomentum	False	False	10	-30	Individual_Deep_Q	1.0	simple_mlp	True	0.05	2500000	44	True	IndivQLearningParticleDNNOnlyOneHotMoreSeeds/34_0_34_slugs_centralized	slugs_centralized	shields/momentum_shield	0.05
IndivQLearningParticleDNNOnlyOneHotMoreSeeds/34_0_34	slugs_centralized	shields/momentum_shield	True	-10	True	ParticleMomentum	False	False	10	-30	Individual_Deep_Q	1.0	simple_mlp	True	0.05	2500000	44	True	IndivQLearningParticleDNNOnlyOneHotMoreSeeds/34_0_34_slugs_decentralized	slugs_decentralized	shields/momentum_shield	0.05
IndivQLearningParticleDNNOnlyOneHotMoreSeeds/34_0_34	slugs_centralized	shields/momentum_shield	True	-10	True	ParticleMomentum	False	False	10	-30	Individual_Deep_Q	1.0	simple_mlp	True	0.05	2500000	44	True	IndivQLearningParticleDNNOnlyOneHotMoreSeeds/34_0_34_none	none		0.05
IndivQLearningParticleDNNOnlyOneHotMoreSeeds/35_0_35	slugs_centralized	shields/momentum_shield	True	-10	True	ParticleMomentum	False	False	10	-30	Individual_Deep_Q	1.0	simple_mlp	True	0.05	2500000	45	True	IndivQLearningParticleDNNOnlyOneHotMoreSeeds/35_0_35_slugs_centralized	slugs_centralized	shields/momentum_shield	0.05
IndivQLearningParticleDNNOnlyOneHotMoreSeeds/35_0_35	slugs_centralized	shields/momentum_shield	True	-10	True	ParticleMomentum	False	False	10	-30	Individual_Deep_Q	1.0	simple_mlp	True	0.05	2500000	45	True	IndivQLearningParticleDNNOnlyOneHotMoreSeeds/35_0_35_slugs_decentralized	slugs_decentralized	shields/momentum_shield	0.05
IndivQLearningParticleDNNOnlyOneHotMoreSeeds/35_0_35	slugs_centralized	shields/momentum_shield	True	-10	True	ParticleMomentum	False	False	10	-30	Individual_Deep_Q	1.0	simple_mlp	True	0.05	2500000	45	True	IndivQLearningParticleDNNOnlyOneHotMoreSeeds/35_0_35_none	none		0.05
IndivQLearningParticleDNNOnlyOneHotMoreSeeds/36_0_36	slugs_centralized	shields/momentum_shield	True	-10	True	ParticleMomentum	False	False	10	-30	Individual_Deep_Q	1.0	simple_mlp	True	0.05	2500000	46	True	IndivQLearningParticleDNNOnlyOneHotMoreSeeds/36_0_36_slugs_centralized	slugs_centralized	shields/momentum_shield	0.05
IndivQLearningParticleDNNOnlyOneHotMoreSeeds/36_0_36	slugs_centralized	shields/momentum_shield	True	-10	True	ParticleMomentum	False	False	10	-30	Individual_Deep_Q	1.0	simple_mlp	True	0.05	2500000	46	True	IndivQLearningParticleDNNOnlyOneHotMoreSeeds/36_0_36_slugs_decentralized	slugs_decentralized	shields/momentum_shield	0.05
IndivQLearningParticleDNNOnlyOneHotMoreSeeds/36_0_36	slugs_centralized	shields/momentum_shield	True	-10	True	ParticleMomentum	False	False	10	-30	Individual_Deep_Q	1.0	simple_mlp	True	0.05	2500000	46	True	IndivQLearningParticleDNNOnlyOneHotMoreSeeds/36_0_36_none	none		0.05
IndivQLearningParticleDNNOnlyOneHotMoreSeeds/37_0_37	slugs_centralized	shields/momentum_shield	True	-10	True	ParticleMomentum	False	False	10	-30	Individual_Deep_Q	1.0	simple_mlp	True	0.05	2500000	47	True	IndivQLearningParticleDNNOnlyOneHotMoreSeeds/37_0_37_slugs_centralized	slugs_centralized	shields/momentum_shield	0.05
IndivQLearningParticleDNNOnlyOneHotMoreSeeds/37_0_37	slugs_centralized	shields/momentum_shield	True	-10	True	ParticleMomentum	False	False	10	-30	Individual_Deep_Q	1.0	simple_mlp	True	0.05	2500000	47	True	IndivQLearningParticleDNNOnlyOneHotMoreSeeds/37_0_37_slugs_decentralized	slugs_decentralized	shields/momentum_shield	0.05
IndivQLearningParticleDNNOnlyOneHotMoreSeeds/37_0_37	slugs_centralized	shields/momentum_shield	True	-10	True	ParticleMomentum	False	False	10	-30	Individual_Deep_Q	1.0	simple_mlp	True	0.05	2500000	47	True	IndivQLearningParticleDNNOnlyOneHotMoreSeeds/37_0_37_none	none		0.05
IndivQLearningParticleDNNOnlyOneHotMoreSeeds/38_0_38	slugs_centralized	shields/momentum_shield	True	-10	True	ParticleMomentum	False	False	10	-30	Individual_Deep_Q	1.0	simple_mlp	True	0.05	2500000	48	True	IndivQLearningParticleDNNOnlyOneHotMoreSeeds/38_0_38_slugs_centralized	slugs_centralized	shields/momentum_shield	0.05
IndivQLearningParticleDNNOnlyOneHotMoreSeeds/38_0_38	slugs_centralized	shields/momentum_shield	True	-10	True	ParticleMomentum	False	False	10	-30	Individual_Deep_Q	1.0	simple_mlp	True	0.05	2500000	48	True	IndivQLearningParticleDNNOnlyOneHotMoreSeeds/38_0_38_slugs_decentralized	slugs_decentralized	shields/momentum_shield	0.05
IndivQLearningParticleDNNOnlyOneHotMoreSeeds/38_0_38	slugs_centralized	shields/momentum_shield	True	-10	True	ParticleMomentum	False	False	10	-30	Individual_Deep_Q	1.0	simple_mlp	True	0.05	2500000	48	True	IndivQLearningParticleDNNOnlyOneHotMoreSeeds/38_0_38_none	none		0.05
IndivQLearningParticleDNNOnlyOneHotMoreSeeds/39_0_39	slugs_centralized	shields/momentum_shield	True	-10	True	ParticleMomentum	False	False	10	-30	Individual_Deep_Q	1.0	simple_mlp	True	0.05	2500000	49	True	IndivQLearningParticleDNNOnlyOneHotMoreSeeds/39_0_39_slugs_centralized	slugs_centralized	shields/momentum_shield	0.05
IndivQLearningParticleDNNOnlyOneHotMoreSeeds/39_0_39	slugs_centralized	shields/momentum_shield	True	-10	True	ParticleMomentum	False	False	10	-30	Individual_Deep_Q	1.0	simple_mlp	True	0.05	2500000	49	True	IndivQLearningParticleDNNOnlyOneHotMoreSeeds/39_0_39_slugs_decentralized	slugs_decentralized	shields/momentum_shield	0.05
IndivQLearningParticleDNNOnlyOneHotMoreSeeds/39_0_39	slugs_centralized	shields/momentum_shield	True	-10	True	ParticleMomentum	False	False	10	-30	Individual_Deep_Q	1.0	simple_mlp	True	0.05	2500000	49	True	IndivQLearningParticleDNNOnlyOneHotMoreSeeds/39_0_39_none	none		0.05
IndivQLearningParticleDNNOnlyOneHotMoreSeeds/40_1_0	slugs_decentralized	shields/momentum_shield	True	-10	True	ParticleMomentum	False	False	10	-30	Individual_Deep_Q	1.0	simple_mlp	True	0.05	2500000	10	True	IndivQLearningParticleDNNOnlyOneHotMoreSeeds/40_1_0_slugs_centralized	slugs_centralized	shields/momentum_shield	0.05
IndivQLearningParticleDNNOnlyOneHotMoreSeeds/40_1_0	slugs_decentralized	shields/momentum_shield	True	-10	True	ParticleMomentum	False	False	10	-30	Individual_Deep_Q	1.0	simple_mlp	True	0.05	2500000	10	True	IndivQLearningParticleDNNOnlyOneHotMoreSeeds/40_1_0_slugs_decentralized	slugs_decentralized	shields/momentum_shield	0.05
IndivQLearningParticleDNNOnlyOneHotMoreSeeds/40_1_0	slugs_decentralized	shields/momentum_shield	True	-10	True	ParticleMomentum	False	False	10	-30	Individual_Deep_Q	1.0	simple_mlp	True	0.05	2500000	10	True	IndivQLearningParticleDNNOnlyOneHotMoreSeeds/40_1_0_none	none		0.05
IndivQLearningParticleDNNOnlyOneHotMoreSeeds/41_1_1	slugs_decentralized	shields/momentum_shield	True	-10	True	ParticleMomentum	False	False	10	-30	Individual_Deep_Q	1.0	simple_mlp	True	0.05	2500000	11	True	IndivQLearningParticleDNNOnlyOneHotMoreSeeds/41_1_1_slugs_centralized	slugs_centralized	shields/momentum_shield	0.05
IndivQLearningParticleDNNOnlyOneHotMoreSeeds/41_1_1	slugs_decentralized	shields/momentum_shield	True	-10	True	ParticleMomentum	False	False	10	-30	Individual_Deep_Q	1.0	simple_mlp	True	0.05	2500000	11	True	IndivQLearningParticleDNNOnlyOneHotMoreSeeds/41_1_1_slugs_decentralized	slugs_decentralized	shields/momentum_shield	0.05
IndivQLearningParticleDNNOnlyOneHotMoreSeeds/41_1_1	slugs_decentralized	shields/momentum_shield	True	-10	True	ParticleMomentum	False	False	10	-30	Individual_Deep_Q	1.0	simple_mlp	True	0.05	2500000	11	True	IndivQLearningParticleDNNOnlyOneHotMoreSeeds/41_1_1_none	none		0.05
IndivQLearningParticleDNNOnlyOneHotMoreSeeds/42_1_2	slugs_decentralized	shields/momentum_shield	True	-10	True	ParticleMomentum	False	False	10	-30	Individual_Deep_Q	1.0	simple_mlp	True	0.05	2500000	12	True	IndivQLearningParticleDNNOnlyOneHotMoreSeeds/42_1_2_slugs_centralized	slugs_centralized	shields/momentum_shield	0.05
IndivQLearningParticleDNNOnlyOneHotMoreSeeds/42_1_2	slugs_decentralized	shields/momentum_shield	True	-10	True	ParticleMomentum	False	False	10	-30	Individual_Deep_Q	1.0	simple_mlp	True	0.05	2500000	12	True	IndivQLearningParticleDNNOnlyOneHotMoreSeeds/42_1_2_slugs_decentralized	slugs_decentralized	shields/momentum_shield	0.05
IndivQLearningParticleDNNOnlyOneHotMoreSeeds/42_1_2	slugs_decentralized	shields/momentum_shield	True	-10	True	ParticleMomentum	False	False	10	-30	Individual_Deep_Q	1.0	simple_mlp	True	0.05	2500000	12	True	IndivQLearningParticleDNNOnlyOneHotMoreSeeds/42_1_2_none	none		0.05
IndivQLearningParticleDNNOnlyOneHotMoreSeeds/43_1_3	slugs_decentralized	shields/momentum_shield	True	-10	True	ParticleMomentum	False	False	10	-30	Individual_Deep_Q	1.0	simple_mlp	True	0.05	2500000	13	True	IndivQLearningParticleDNNOnlyOneHotMoreSeeds/43_1_3_slugs_centralized	slugs_centralized	shields/momentum_shield	0.05
IndivQLearningParticleDNNOnlyOneHotMoreSeeds/43_1_3	slugs_decentralized	shields/momentum_shield	True	-10	True	ParticleMomentum	False	False	10	-30	Individual_Deep_Q	1.0	simple_mlp	True	0.05	2500000	13	True	IndivQLearningParticleDNNOnlyOneHotMoreSeeds/43_1_3_slugs_decentralized	slugs_decentralized	shields/momentum_shield	0.05
IndivQLearningParticleDNNOnlyOneHotMoreSeeds/43_1_3	slugs_decentralized	shields/momentum_shield	True	-10	True	ParticleMomentum	False	False	10	-30	Individual_Deep_Q	1.0	simple_mlp	True	0.05	2500000	13	True	IndivQLearningParticleDNNOnlyOneHotMoreSeeds/43_1_3_none	none		0.05
IndivQLearningParticleDNNOnlyOneHotMoreSeeds/44_1_4	slugs_decentralized	shields/momentum_shield	True	-10	True	ParticleMomentum	False	False	10	-30	Individual_Deep_Q	1.0	simple_mlp	True	0.05	2500000	14	True	IndivQLearningParticleDNNOnlyOneHotMoreSeeds/44_1_4_slugs_centralized	slugs_centralized	shields/momentum_shield	0.05
IndivQLearningParticleDNNOnlyOneHotMoreSeeds/44_1_4	slugs_decentralized	shields/momentum_shield	True	-10	True	ParticleMomentum	False	False	10	-30	Individual_Deep_Q	1.0	simple_mlp	True	0.05	2500000	14	True	IndivQLearningParticleDNNOnlyOneHotMoreSeeds/44_1_4_slugs_decentralized	slugs_decentralized	shields/momentum_shield	0.05
IndivQLearningParticleDNNOnlyOneHotMoreSeeds/44_1_4	slugs_decentralized	shields/momentum_shield	True	-10	True	ParticleMomentum	False	False	10	-30	Individual_Deep_Q	1.0	simple_mlp	True	0.05	2500000	14	True	IndivQLearningParticleDNNOnlyOneHotMoreSeeds/44_1_4_none	none		0.05
IndivQLearningParticleDNNOnlyOneHotMoreSeeds/45_1_5	slugs_decentralized	shields/momentum_shield	True	-10	True	ParticleMomentum	False	False	10	-30	Individual_Deep_Q	1.0	simple_mlp	True	0.05	2500000	15	True	IndivQLearningParticleDNNOnlyOneHotMoreSeeds/45_1_5_slugs_centralized	slugs_centralized	shields/momentum_shield	0.05
IndivQLearningParticleDNNOnlyOneHotMoreSeeds/45_1_5	slugs_decentralized	shields/momentum_shield	True	-10	True	ParticleMomentum	False	False	10	-30	Individual_Deep_Q	1.0	simple_mlp	True	0.05	2500000	15	True	IndivQLearningParticleDNNOnlyOneHotMoreSeeds/45_1_5_slugs_decentralized	slugs_decentralized	shields/momentum_shield	0.05
IndivQLearningParticleDNNOnlyOneHotMoreSeeds/45_1_5	slugs_decentralized	shields/momentum_shield	True	-10	True	ParticleMomentum	False	False	10	-30	Individual_Deep_Q	1.0	simple_mlp	True	0.05	2500000	15	True	IndivQLearningParticleDNNOnlyOneHotMoreSeeds/45_1_5_none	none		0.05
IndivQLearningParticleDNNOnlyOneHotMoreSeeds/46_1_6	slugs_decentralized	shields/momentum_shield	True	-10	True	ParticleMomentum	False	False	10	-30	Individual_Deep_Q	1.0	simple_mlp	True	0.05	2500000	16	True	IndivQLearningParticleDNNOnlyOneHotMoreSeeds/46_1_6_slugs_centralized	slugs_centralized	shields/momentum_shield	0.05
IndivQLearningParticleDNNOnlyOneHotMoreSeeds/46_1_6	slugs_decentralized	shields/momentum_shield	True	-10	True	ParticleMomentum	False	False	10	-30	Individual_Deep_Q	1.0	simple_mlp	True	0.05	2500000	16	True	IndivQLearningParticleDNNOnlyOneHotMoreSeeds/46_1_6_slugs_decentralized	slugs_decentralized	shields/momentum_shield	0.05
IndivQLearningParticleDNNOnlyOneHotMoreSeeds/46_1_6	slugs_decentralized	shields/momentum_shield	True	-10	True	ParticleMomentum	False	False	10	-30	Individual_Deep_Q	1.0	simple_mlp	True	0.05	2500000	16	True	IndivQLearningParticleDNNOnlyOneHotMoreSeeds/46_1_6_none	none		0.05
IndivQLearningParticleDNNOnlyOneHotMoreSeeds/47_1_7	slugs_decentralized	shields/momentum_shield	True	-10	True	ParticleMomentum	False	False	10	-30	Individual_Deep_Q	1.0	simple_mlp	True	0.05	2500000	17	True	IndivQLearningParticleDNNOnlyOneHotMoreSeeds/47_1_7_slugs_centralized	slugs_centralized	shields/momentum_shield	0.05
IndivQLearningParticleDNNOnlyOneHotMoreSeeds/47_1_7	slugs_decentralized	shields/momentum_shield	True	-10	True	ParticleMomentum	False	False	10	-30	Individual_Deep_Q	1.0	simple_mlp	True	0.05	2500000	17	True	IndivQLearningParticleDNNOnlyOneHotMoreSeeds/47_1_7_slugs_decentralized	slugs_decentralized	shields/momentum_shield	0.05
IndivQLearningParticleDNNOnlyOneHotMoreSeeds/47_1_7	slugs_decentralized	shields/momentum_shield	True	-10	True	ParticleMomentum	False	False	10	-30	Individual_Deep_Q	1.0	simple_mlp	True	0.05	2500000	17	True	IndivQLearningParticleDNNOnlyOneHotMoreSeeds/47_1_7_none	none		0.05
IndivQLearningParticleDNNOnlyOneHotMoreSeeds/48_1_8	slugs_decentralized	shields/momentum_shield	True	-10	True	ParticleMomentum	False	False	10	-30	Individual_Deep_Q	1.0	simple_mlp	True	0.05	2500000	18	True	IndivQLearningParticleDNNOnlyOneHotMoreSeeds/48_1_8_slugs_centralized	slugs_centralized	shields/momentum_shield	0.05
IndivQLearningParticleDNNOnlyOneHotMoreSeeds/48_1_8	slugs_decentralized	shields/momentum_shield	True	-10	True	ParticleMomentum	False	False	10	-30	Individual_Deep_Q	1.0	simple_mlp	True	0.05	2500000	18	True	IndivQLearningParticleDNNOnlyOneHotMoreSeeds/48_1_8_slugs_decentralized	slugs_decentralized	shields/momentum_shield	0.05
IndivQLearningParticleDNNOnlyOneHotMoreSeeds/48_1_8	slugs_decentralized	shields/momentum_shield	True	-10	True	ParticleMomentum	False	False	10	-30	Individual_Deep_Q	1.0	simple_mlp	True	0.05	2500000	18	True	IndivQLearningParticleDNNOnlyOneHotMoreSeeds/48_1_8_none	none		0.05
IndivQLearningParticleDNNOnlyOneHotMoreSeeds/49_1_9	slugs_decentralized	shields/momentum_shield	True	-10	True	ParticleMomentum	False	False	10	-30	Individual_Deep_Q	1.0	simple_mlp	True	0.05	2500000	19	True	IndivQLearningParticleDNNOnlyOneHotMoreSeeds/49_1_9_slugs_centralized	slugs_centralized	shields/momentum_shield	0.05
IndivQLearningParticleDNNOnlyOneHotMoreSeeds/49_1_9	slugs_decentralized	shields/momentum_shield	True	-10	True	ParticleMomentum	False	False	10	-30	Individual_Deep_Q	1.0	simple_mlp	True	0.05	2500000	19	True	IndivQLearningParticleDNNOnlyOneHotMoreSeeds/49_1_9_slugs_decentralized	slugs_decentralized	shields/momentum_shield	0.05
IndivQLearningParticleDNNOnlyOneHotMoreSeeds/49_1_9	slugs_decentralized	shields/momentum_shield	True	-10	True	ParticleMomentum	False	False	10	-30	Individual_Deep_Q	1.0	simple_mlp	True	0.05	2500000	19	True	IndivQLearningParticleDNNOnlyOneHotMoreSeeds/49_1_9_none	none		0.05
IndivQLearningParticleDNNOnlyOneHotMoreSeeds/50_1_10	slugs_decentralized	shields/momentum_shield	True	-10	True	ParticleMomentum	False	False	10	-30	Individual_Deep_Q	1.0	simple_mlp	True	0.05	2500000	20	True	IndivQLearningParticleDNNOnlyOneHotMoreSeeds/50_1_10_slugs_centralized	slugs_centralized	shields/momentum_shield	0.05
IndivQLearningParticleDNNOnlyOneHotMoreSeeds/50_1_10	slugs_decentralized	shields/momentum_shield	True	-10	True	ParticleMomentum	False	False	10	-30	Individual_Deep_Q	1.0	simple_mlp	True	0.05	2500000	20	True	IndivQLearningParticleDNNOnlyOneHotMoreSeeds/50_1_10_slugs_decentralized	slugs_decentralized	shields/momentum_shield	0.05
IndivQLearningParticleDNNOnlyOneHotMoreSeeds/50_1_10	slugs_decentralized	shields/momentum_shield	True	-10	True	ParticleMomentum	False	False	10	-30	Individual_Deep_Q	1.0	simple_mlp	True	0.05	2500000	20	True	IndivQLearningParticleDNNOnlyOneHotMoreSeeds/50_1_10_none	none		0.05
IndivQLearningParticleDNNOnlyOneHotMoreSeeds/51_1_11	slugs_decentralized	shields/momentum_shield	True	-10	True	ParticleMomentum	False	False	10	-30	Individual_Deep_Q	1.0	simple_mlp	True	0.05	2500000	21	True	IndivQLearningParticleDNNOnlyOneHotMoreSeeds/51_1_11_slugs_centralized	slugs_centralized	shields/momentum_shield	0.05
IndivQLearningParticleDNNOnlyOneHotMoreSeeds/51_1_11	slugs_decentralized	shields/momentum_shield	True	-10	True	ParticleMomentum	False	False	10	-30	Individual_Deep_Q	1.0	simple_mlp	True	0.05	2500000	21	True	IndivQLearningParticleDNNOnlyOneHotMoreSeeds/51_1_11_slugs_decentralized	slugs_decentralized	shields/momentum_shield	0.05
IndivQLearningParticleDNNOnlyOneHotMoreSeeds/51_1_11	slugs_decentralized	shields/momentum_shield	True	-10	True	ParticleMomentum	False	False	10	-30	Individual_Deep_Q	1.0	simple_mlp	True	0.05	2500000	21	True	IndivQLearningParticleDNNOnlyOneHotMoreSeeds/51_1_11_none	none		0.05
IndivQLearningParticleDNNOnlyOneHotMoreSeeds/52_1_12	slugs_decentralized	shields/momentum_shield	True	-10	True	ParticleMomentum	False	False	10	-30	Individual_Deep_Q	1.0	simple_mlp	True	0.05	2500000	22	True	IndivQLearningParticleDNNOnlyOneHotMoreSeeds/52_1_12_slugs_centralized	slugs_centralized	shields/momentum_shield	0.05
IndivQLearningParticleDNNOnlyOneHotMoreSeeds/52_1_12	slugs_decentralized	shields/momentum_shield	True	-10	True	ParticleMomentum	False	False	10	-30	Individual_Deep_Q	1.0	simple_mlp	True	0.05	2500000	22	True	IndivQLearningParticleDNNOnlyOneHotMoreSeeds/52_1_12_slugs_decentralized	slugs_decentralized	shields/momentum_shield	0.05
IndivQLearningParticleDNNOnlyOneHotMoreSeeds/52_1_12	slugs_decentralized	shields/momentum_shield	True	-10	True	ParticleMomentum	False	False	10	-30	Individual_Deep_Q	1.0	simple_mlp	True	0.05	2500000	22	True	IndivQLearningParticleDNNOnlyOneHotMoreSeeds/52_1_12_none	none		0.05
IndivQLearningParticleDNNOnlyOneHotMoreSeeds/53_1_13	slugs_decentralized	shields/momentum_shield	True	-10	True	ParticleMomentum	False	False	10	-30	Individual_Deep_Q	1.0	simple_mlp	True	0.05	2500000	23	True	IndivQLearningParticleDNNOnlyOneHotMoreSeeds/53_1_13_slugs_centralized	slugs_centralized	shields/momentum_shield	0.05
IndivQLearningParticleDNNOnlyOneHotMoreSeeds/53_1_13	slugs_decentralized	shields/momentum_shield	True	-10	True	ParticleMomentum	False	False	10	-30	Individual_Deep_Q	1.0	simple_mlp	True	0.05	2500000	23	True	IndivQLearningParticleDNNOnlyOneHotMoreSeeds/53_1_13_slugs_decentralized	slugs_decentralized	shields/momentum_shield	0.05
IndivQLearningParticleDNNOnlyOneHotMoreSeeds/53_1_13	slugs_decentralized	shields/momentum_shield	True	-10	True	ParticleMomentum	False	False	10	-30	Individual_Deep_Q	1.0	simple_mlp	True	0.05	2500000	23	True	IndivQLearningParticleDNNOnlyOneHotMoreSeeds/53_1_13_none	none		0.05
IndivQLearningParticleDNNOnlyOneHotMoreSeeds/54_1_14	slugs_decentralized	shields/momentum_shield	True	-10	True	ParticleMomentum	False	False	10	-30	Individual_Deep_Q	1.0	simple_mlp	True	0.05	2500000	24	True	IndivQLearningParticleDNNOnlyOneHotMoreSeeds/54_1_14_slugs_centralized	slugs_centralized	shields/momentum_shield	0.05
IndivQLearningParticleDNNOnlyOneHotMoreSeeds/54_1_14	slugs_decentralized	shields/momentum_shield	True	-10	True	ParticleMomentum	False	False	10	-30	Individual_Deep_Q	1.0	simple_mlp	True	0.05	2500000	24	True	IndivQLearningParticleDNNOnlyOneHotMoreSeeds/54_1_14_slugs_decentralized	slugs_decentralized	shields/momentum_shield	0.05
IndivQLearningParticleDNNOnlyOneHotMoreSeeds/54_1_14	slugs_decentralized	shields/momentum_shield	True	-10	True	ParticleMomentum	False	False	10	-30	Individual_Deep_Q	1.0	simple_mlp	True	0.05	2500000	24	True	IndivQLearningParticleDNNOnlyOneHotMoreSeeds/54_1_14_none	none		0.05
IndivQLearningParticleDNNOnlyOneHotMoreSeeds/55_1_15	slugs_decentralized	shields/momentum_shield	True	-10	True	ParticleMomentum	False	False	10	-30	Individual_Deep_Q	1.0	simple_mlp	True	0.05	2500000	25	True	IndivQLearningParticleDNNOnlyOneHotMoreSeeds/55_1_15_slugs_centralized	slugs_centralized	shields/momentum_shield	0.05
IndivQLearningParticleDNNOnlyOneHotMoreSeeds/55_1_15	slugs_decentralized	shields/momentum_shield	True	-10	True	ParticleMomentum	False	False	10	-30	Individual_Deep_Q	1.0	simple_mlp	True	0.05	2500000	25	True	IndivQLearningParticleDNNOnlyOneHotMoreSeeds/55_1_15_slugs_decentralized	slugs_decentralized	shields/momentum_shield	0.05
IndivQLearningParticleDNNOnlyOneHotMoreSeeds/55_1_15	slugs_decentralized	shields/momentum_shield	True	-10	True	ParticleMomentum	False	False	10	-30	Individual_Deep_Q	1.0	simple_mlp	True	0.05	2500000	25	True	IndivQLearningParticleDNNOnlyOneHotMoreSeeds/55_1_15_none	none		0.05
IndivQLearningParticleDNNOnlyOneHotMoreSeeds/56_1_16	slugs_decentralized	shields/momentum_shield	True	-10	True	ParticleMomentum	False	False	10	-30	Individual_Deep_Q	1.0	simple_mlp	True	0.05	2500000	26	True	IndivQLearningParticleDNNOnlyOneHotMoreSeeds/56_1_16_slugs_centralized	slugs_centralized	shields/momentum_shield	0.05
IndivQLearningParticleDNNOnlyOneHotMoreSeeds/56_1_16	slugs_decentralized	shields/momentum_shield	True	-10	True	ParticleMomentum	False	False	10	-30	Individual_Deep_Q	1.0	simple_mlp	True	0.05	2500000	26	True	IndivQLearningParticleDNNOnlyOneHotMoreSeeds/56_1_16_slugs_decentralized	slugs_decentralized	shields/momentum_shield	0.05
IndivQLearningParticleDNNOnlyOneHotMoreSeeds/56_1_16	slugs_decentralized	shields/momentum_shield	True	-10	True	ParticleMomentum	False	False	10	-30	Individual_Deep_Q	1.0	simple_mlp	True	0.05	2500000	26	True	IndivQLearningParticleDNNOnlyOneHotMoreSeeds/56_1_16_none	none		0.05
IndivQLearningParticleDNNOnlyOneHotMoreSeeds/57_1_17	slugs_decentralized	shields/momentum_shield	True	-10	True	ParticleMomentum	False	False	10	-30	Individual_Deep_Q	1.0	simple_mlp	True	0.05	2500000	27	True	IndivQLearningParticleDNNOnlyOneHotMoreSeeds/57_1_17_slugs_centralized	slugs_centralized	shields/momentum_shield	0.05
IndivQLearningParticleDNNOnlyOneHotMoreSeeds/57_1_17	slugs_decentralized	shields/momentum_shield	True	-10	True	ParticleMomentum	False	False	10	-30	Individual_Deep_Q	1.0	simple_mlp	True	0.05	2500000	27	True	IndivQLearningParticleDNNOnlyOneHotMoreSeeds/57_1_17_slugs_decentralized	slugs_decentralized	shields/momentum_shield	0.05
IndivQLearningParticleDNNOnlyOneHotMoreSeeds/57_1_17	slugs_decentralized	shields/momentum_shield	True	-10	True	ParticleMomentum	False	False	10	-30	Individual_Deep_Q	1.0	simple_mlp	True	0.05	2500000	27	True	IndivQLearningParticleDNNOnlyOneHotMoreSeeds/57_1_17_none	none		0.05
IndivQLearningParticleDNNOnlyOneHotMoreSeeds/58_1_18	slugs_decentralized	shields/momentum_shield	True	-10	True	ParticleMomentum	False	False	10	-30	Individual_Deep_Q	1.0	simple_mlp	True	0.05	2500000	28	True	IndivQLearningParticleDNNOnlyOneHotMoreSeeds/58_1_18_slugs_centralized	slugs_centralized	shields/momentum_shield	0.05
IndivQLearningParticleDNNOnlyOneHotMoreSeeds/58_1_18	slugs_decentralized	shields/momentum_shield	True	-10	True	ParticleMomentum	False	False	10	-30	Individual_Deep_Q	1.0	simple_mlp	True	0.05	2500000	28	True	IndivQLearningParticleDNNOnlyOneHotMoreSeeds/58_1_18_slugs_decentralized	slugs_decentralized	shields/momentum_shield	0.05
IndivQLearningParticleDNNOnlyOneHotMoreSeeds/58_1_18	slugs_decentralized	shields/momentum_shield	True	-10	True	ParticleMomentum	False	False	10	-30	Individual_Deep_Q	1.0	simple_mlp	True	0.05	2500000	28	True	IndivQLearningParticleDNNOnlyOneHotMoreSeeds/58_1_18_none	none		0.05
IndivQLearningParticleDNNOnlyOneHotMoreSeeds/59_1_19	slugs_decentralized	shields/momentum_shield	True	-10	True	ParticleMomentum	False	False	10	-30	Individual_Deep_Q	1.0	simple_mlp	True	0.05	2500000	29	True	IndivQLearningParticleDNNOnlyOneHotMoreSeeds/59_1_19_slugs_centralized	slugs_centralized	shields/momentum_shield	0.05
IndivQLearningParticleDNNOnlyOneHotMoreSeeds/59_1_19	slugs_decentralized	shields/momentum_shield	True	-10	True	ParticleMomentum	False	False	10	-30	Individual_Deep_Q	1.0	simple_mlp	True	0.05	2500000	29	True	IndivQLearningParticleDNNOnlyOneHotMoreSeeds/59_1_19_slugs_decentralized	slugs_decentralized	shields/momentum_shield	0.05
IndivQLearningParticleDNNOnlyOneHotMoreSeeds/59_1_19	slugs_decentralized	shields/momentum_shield	True	-10	True	ParticleMomentum	False	False	10	-30	Individual_Deep_Q	1.0	simple_mlp	True	0.05	2500000	29	True	IndivQLearningParticleDNNOnlyOneHotMoreSeeds/59_1_19_none	none		0.05
IndivQLearningParticleDNNOnlyOneHotMoreSeeds/60_1_20	slugs_decentralized	shields/momentum_shield	True	-10	True	ParticleMomentum	False	False	10	-30	Individual_Deep_Q	1.0	simple_mlp	True	0.05	2500000	30	True	IndivQLearningParticleDNNOnlyOneHotMoreSeeds/60_1_20_slugs_centralized	slugs_centralized	shields/momentum_shield	0.05
IndivQLearningParticleDNNOnlyOneHotMoreSeeds/60_1_20	slugs_decentralized	shields/momentum_shield	True	-10	True	ParticleMomentum	False	False	10	-30	Individual_Deep_Q	1.0	simple_mlp	True	0.05	2500000	30	True	IndivQLearningParticleDNNOnlyOneHotMoreSeeds/60_1_20_slugs_decentralized	slugs_decentralized	shields/momentum_shield	0.05
IndivQLearningParticleDNNOnlyOneHotMoreSeeds/60_1_20	slugs_decentralized	shields/momentum_shield	True	-10	True	ParticleMomentum	False	False	10	-30	Individual_Deep_Q	1.0	simple_mlp	True	0.05	2500000	30	True	IndivQLearningParticleDNNOnlyOneHotMoreSeeds/60_1_20_none	none		0.05
IndivQLearningParticleDNNOnlyOneHotMoreSeeds/61_1_21	slugs_decentralized	shields/momentum_shield	True	-10	True	ParticleMomentum	False	False	10	-30	Individual_Deep_Q	1.0	simple_mlp	True	0.05	2500000	31	True	IndivQLearningParticleDNNOnlyOneHotMoreSeeds/61_1_21_slugs_centralized	slugs_centralized	shields/momentum_shield	0.05
IndivQLearningParticleDNNOnlyOneHotMoreSeeds/61_1_21	slugs_decentralized	shields/momentum_shield	True	-10	True	ParticleMomentum	False	False	10	-30	Individual_Deep_Q	1.0	simple_mlp	True	0.05	2500000	31	True	IndivQLearningParticleDNNOnlyOneHotMoreSeeds/61_1_21_slugs_decentralized	slugs_decentralized	shields/momentum_shield	0.05
IndivQLearningParticleDNNOnlyOneHotMoreSeeds/61_1_21	slugs_decentralized	shields/momentum_shield	True	-10	True	ParticleMomentum	False	False	10	-30	Individual_Deep_Q	1.0	simple_mlp	True	0.05	2500000	31	True	IndivQLearningParticleDNNOnlyOneHotMoreSeeds/61_1_21_none	none		0.05
IndivQLearningParticleDNNOnlyOneHotMoreSeeds/62_1_22	slugs_decentralized	shields/momentum_shield	True	-10	True	ParticleMomentum	False	False	10	-30	Individual_Deep_Q	1.0	simple_mlp	True	0.05	2500000	32	True	IndivQLearningParticleDNNOnlyOneHotMoreSeeds/62_1_22_slugs_centralized	slugs_centralized	shields/momentum_shield	0.05
IndivQLearningParticleDNNOnlyOneHotMoreSeeds/62_1_22	slugs_decentralized	shields/momentum_shield	True	-10	True	ParticleMomentum	False	False	10	-30	Individual_Deep_Q	1.0	simple_mlp	True	0.05	2500000	32	True	IndivQLearningParticleDNNOnlyOneHotMoreSeeds/62_1_22_slugs_decentralized	slugs_decentralized	shields/momentum_shield	0.05
IndivQLearningParticleDNNOnlyOneHotMoreSeeds/62_1_22	slugs_decentralized	shields/momentum_shield	True	-10	True	ParticleMomentum	False	False	10	-30	Individual_Deep_Q	1.0	simple_mlp	True	0.05	2500000	32	True	IndivQLearningParticleDNNOnlyOneHotMoreSeeds/62_1_22_none	none		0.05
IndivQLearningParticleDNNOnlyOneHotMoreSeeds/63_1_23	slugs_decentralized	shields/momentum_shield	True	-10	True	ParticleMomentum	False	False	10	-30	Individual_Deep_Q	1.0	simple_mlp	True	0.05	2500000	33	True	IndivQLearningParticleDNNOnlyOneHotMoreSeeds/63_1_23_slugs_centralized	slugs_centralized	shields/momentum_shield	0.05
IndivQLearningParticleDNNOnlyOneHotMoreSeeds/63_1_23	slugs_decentralized	shields/momentum_shield	True	-10	True	ParticleMomentum	False	False	10	-30	Individual_Deep_Q	1.0	simple_mlp	True	0.05	2500000	33	True	IndivQLearningParticleDNNOnlyOneHotMoreSeeds/63_1_23_slugs_decentralized	slugs_decentralized	shields/momentum_shield	0.05
IndivQLearningParticleDNNOnlyOneHotMoreSeeds/63_1_23	slugs_decentralized	shields/momentum_shield	True	-10	True	ParticleMomentum	False	False	10	-30	Individual_Deep_Q	1.0	simple_mlp	True	0.05	2500000	33	True	IndivQLearningParticleDNNOnlyOneHotMoreSeeds/63_1_23_none	none		0.05
IndivQLearningParticleDNNOnlyOneHotMoreSeeds/64_1_24	slugs_decentralized	shields/momentum_shield	True	-10	True	ParticleMomentum	False	False	10	-30	Individual_Deep_Q	1.0	simple_mlp	True	0.05	2500000	34	True	IndivQLearningParticleDNNOnlyOneHotMoreSeeds/64_1_24_slugs_centralized	slugs_centralized	shields/momentum_shield	0.05
IndivQLearningParticleDNNOnlyOneHotMoreSeeds/64_1_24	slugs_decentralized	shields/momentum_shield	True	-10	True	ParticleMomentum	False	False	10	-30	Individual_Deep_Q	1.0	simple_mlp	True	0.05	2500000	34	True	IndivQLearningParticleDNNOnlyOneHotMoreSeeds/64_1_24_slugs_decentralized	slugs_decentralized	shields/momentum_shield	0.05
IndivQLearningParticleDNNOnlyOneHotMoreSeeds/64_1_24	slugs_decentralized	shields/momentum_shield	True	-10	True	ParticleMomentum	False	False	10	-30	Individual_Deep_Q	1.0	simple_mlp	True	0.05	2500000	34	True	IndivQLearningParticleDNNOnlyOneHotMoreSeeds/64_1_24_none	none		0.05
IndivQLearningParticleDNNOnlyOneHotMoreSeeds/65_1_25	slugs_decentralized	shields/momentum_shield	True	-10	True	ParticleMomentum	False	False	10	-30	Individual_Deep_Q	1.0	simple_mlp	True	0.05	2500000	35	True	IndivQLearningParticleDNNOnlyOneHotMoreSeeds/65_1_25_slugs_centralized	slugs_centralized	shields/momentum_shield	0.05
IndivQLearningParticleDNNOnlyOneHotMoreSeeds/65_1_25	slugs_decentralized	shields/momentum_shield	True	-10	True	ParticleMomentum	False	False	10	-30	Individual_Deep_Q	1.0	simple_mlp	True	0.05	2500000	35	True	IndivQLearningParticleDNNOnlyOneHotMoreSeeds/65_1_25_slugs_decentralized	slugs_decentralized	shields/momentum_shield	0.05
IndivQLearningParticleDNNOnlyOneHotMoreSeeds/65_1_25	slugs_decentralized	shields/momentum_shield	True	-10	True	ParticleMomentum	False	False	10	-30	Individual_Deep_Q	1.0	simple_mlp	True	0.05	2500000	35	True	IndivQLearningParticleDNNOnlyOneHotMoreSeeds/65_1_25_none	none		0.05
IndivQLearningParticleDNNOnlyOneHotMoreSeeds/66_1_26	slugs_decentralized	shields/momentum_shield	True	-10	True	ParticleMomentum	False	False	10	-30	Individual_Deep_Q	1.0	simple_mlp	True	0.05	2500000	36	True	IndivQLearningParticleDNNOnlyOneHotMoreSeeds/66_1_26_slugs_centralized	slugs_centralized	shields/momentum_shield	0.05
IndivQLearningParticleDNNOnlyOneHotMoreSeeds/66_1_26	slugs_decentralized	shields/momentum_shield	True	-10	True	ParticleMomentum	False	False	10	-30	Individual_Deep_Q	1.0	simple_mlp	True	0.05	2500000	36	True	IndivQLearningParticleDNNOnlyOneHotMoreSeeds/66_1_26_slugs_decentralized	slugs_decentralized	shields/momentum_shield	0.05
IndivQLearningParticleDNNOnlyOneHotMoreSeeds/66_1_26	slugs_decentralized	shields/momentum_shield	True	-10	True	ParticleMomentum	False	False	10	-30	Individual_Deep_Q	1.0	simple_mlp	True	0.05	2500000	36	True	IndivQLearningParticleDNNOnlyOneHotMoreSeeds/66_1_26_none	none		0.05
IndivQLearningParticleDNNOnlyOneHotMoreSeeds/67_1_27	slugs_decentralized	shields/momentum_shield	True	-10	True	ParticleMomentum	False	False	10	-30	Individual_Deep_Q	1.0	simple_mlp	True	0.05	2500000	37	True	IndivQLearningParticleDNNOnlyOneHotMoreSeeds/67_1_27_slugs_centralized	slugs_centralized	shields/momentum_shield	0.05
IndivQLearningParticleDNNOnlyOneHotMoreSeeds/67_1_27	slugs_decentralized	shields/momentum_shield	True	-10	True	ParticleMomentum	False	False	10	-30	Individual_Deep_Q	1.0	simple_mlp	True	0.05	2500000	37	True	IndivQLearningParticleDNNOnlyOneHotMoreSeeds/67_1_27_slugs_decentralized	slugs_decentralized	shields/momentum_shield	0.05
IndivQLearningParticleDNNOnlyOneHotMoreSeeds/67_1_27	slugs_decentralized	shields/momentum_shield	True	-10	True	ParticleMomentum	False	False	10	-30	Individual_Deep_Q	1.0	simple_mlp	True	0.05	2500000	37	True	IndivQLearningParticleDNNOnlyOneHotMoreSeeds/67_1_27_none	none		0.05
IndivQLearningParticleDNNOnlyOneHotMoreSeeds/68_1_28	slugs_decentralized	shields/momentum_shield	True	-10	True	ParticleMomentum	False	False	10	-30	Individual_Deep_Q	1.0	simple_mlp	True	0.05	2500000	38	True	IndivQLearningParticleDNNOnlyOneHotMoreSeeds/68_1_28_slugs_centralized	slugs_centralized	shields/momentum_shield	0.05
IndivQLearningParticleDNNOnlyOneHotMoreSeeds/68_1_28	slugs_decentralized	shields/momentum_shield	True	-10	True	ParticleMomentum	False	False	10	-30	Individual_Deep_Q	1.0	simple_mlp	True	0.05	2500000	38	True	IndivQLearningParticleDNNOnlyOneHotMoreSeeds/68_1_28_slugs_decentralized	slugs_decentralized	shields/momentum_shield	0.05
IndivQLearningParticleDNNOnlyOneHotMoreSeeds/68_1_28	slugs_decentralized	shields/momentum_shield	True	-10	True	ParticleMomentum	False	False	10	-30	Individual_Deep_Q	1.0	simple_mlp	True	0.05	2500000	38	True	IndivQLearningParticleDNNOnlyOneHotMoreSeeds/68_1_28_none	none		0.05
IndivQLearningParticleDNNOnlyOneHotMoreSeeds/69_1_29	slugs_decentralized	shields/momentum_shield	True	-10	True	ParticleMomentum	False	False	10	-30	Individual_Deep_Q	1.0	simple_mlp	True	0.05	2500000	39	True	IndivQLearningParticleDNNOnlyOneHotMoreSeeds/69_1_29_slugs_centralized	slugs_centralized	shields/momentum_shield	0.05
IndivQLearningParticleDNNOnlyOneHotMoreSeeds/69_1_29	slugs_decentralized	shields/momentum_shield	True	-10	True	ParticleMomentum	False	False	10	-30	Individual_Deep_Q	1.0	simple_mlp	True	0.05	2500000	39	True	IndivQLearningParticleDNNOnlyOneHotMoreSeeds/69_1_29_slugs_decentralized	slugs_decentralized	shields/momentum_shield	0.05
IndivQLearningParticleDNNOnlyOneHotMoreSeeds/69_1_29	slugs_decentralized	shields/momentum_shield	True	-10	True	ParticleMomentum	False	False	10	-30	Individual_Deep_Q	1.0	simple_mlp	True	0.05	2500000	39	True	IndivQLearningParticleDNNOnlyOneHotMoreSeeds/69_1_29_none	none		0.05
IndivQLearningParticleDNNOnlyOneHotMoreSeeds/70_1_30	slugs_decentralized	shields/momentum_shield	True	-10	True	ParticleMomentum	False	False	10	-30	Individual_Deep_Q	1.0	simple_mlp	True	0.05	2500000	40	True	IndivQLearningParticleDNNOnlyOneHotMoreSeeds/70_1_30_slugs_centralized	slugs_centralized	shields/momentum_shield	0.05
IndivQLearningParticleDNNOnlyOneHotMoreSeeds/70_1_30	slugs_decentralized	shields/momentum_shield	True	-10	True	ParticleMomentum	False	False	10	-30	Individual_Deep_Q	1.0	simple_mlp	True	0.05	2500000	40	True	IndivQLearningParticleDNNOnlyOneHotMoreSeeds/70_1_30_slugs_decentralized	slugs_decentralized	shields/momentum_shield	0.05
IndivQLearningParticleDNNOnlyOneHotMoreSeeds/70_1_30	slugs_decentralized	shields/momentum_shield	True	-10	True	ParticleMomentum	False	False	10	-30	Individual_Deep_Q	1.0	simple_mlp	True	0.05	2500000	40	True	IndivQLearningParticleDNNOnlyOneHotMoreSeeds/70_1_30_none	none		0.05
IndivQLearningParticleDNNOnlyOneHotMoreSeeds/71_1_31	slugs_decentralized	shields/momentum_shield	True	-10	True	ParticleMomentum	False	False	10	-30	Individual_Deep_Q	1.0	simple_mlp	True	0.05	2500000	41	True	IndivQLearningParticleDNNOnlyOneHotMoreSeeds/71_1_31_slugs_centralized	slugs_centralized	shields/momentum_shield	0.05
IndivQLearningParticleDNNOnlyOneHotMoreSeeds/71_1_31	slugs_decentralized	shields/momentum_shield	True	-10	True	ParticleMomentum	False	False	10	-30	Individual_Deep_Q	1.0	simple_mlp	True	0.05	2500000	41	True	IndivQLearningParticleDNNOnlyOneHotMoreSeeds/71_1_31_slugs_decentralized	slugs_decentralized	shields/momentum_shield	0.05
IndivQLearningParticleDNNOnlyOneHotMoreSeeds/71_1_31	slugs_decentralized	shields/momentum_shield	True	-10	True	ParticleMomentum	False	False	10	-30	Individual_Deep_Q	1.0	simple_mlp	True	0.05	2500000	41	True	IndivQLearningParticleDNNOnlyOneHotMoreSeeds/71_1_31_none	none		0.05
IndivQLearningParticleDNNOnlyOneHotMoreSeeds/72_1_32	slugs_decentralized	shields/momentum_shield	True	-10	True	ParticleMomentum	False	False	10	-30	Individual_Deep_Q	1.0	simple_mlp	True	0.05	2500000	42	True	IndivQLearningParticleDNNOnlyOneHotMoreSeeds/72_1_32_slugs_centralized	slugs_centralized	shields/momentum_shield	0.05
IndivQLearningParticleDNNOnlyOneHotMoreSeeds/72_1_32	slugs_decentralized	shields/momentum_shield	True	-10	True	ParticleMomentum	False	False	10	-30	Individual_Deep_Q	1.0	simple_mlp	True	0.05	2500000	42	True	IndivQLearningParticleDNNOnlyOneHotMoreSeeds/72_1_32_slugs_decentralized	slugs_decentralized	shields/momentum_shield	0.05
IndivQLearningParticleDNNOnlyOneHotMoreSeeds/72_1_32	slugs_decentralized	shields/momentum_shield	True	-10	True	ParticleMomentum	False	False	10	-30	Individual_Deep_Q	1.0	simple_mlp	True	0.05	2500000	42	True	IndivQLearningParticleDNNOnlyOneHotMoreSeeds/72_1_32_none	none		0.05
IndivQLearningParticleDNNOnlyOneHotMoreSeeds/73_1_33	slugs_decentralized	shields/momentum_shield	True	-10	True	ParticleMomentum	False	False	10	-30	Individual_Deep_Q	1.0	simple_mlp	True	0.05	2500000	43	True	IndivQLearningParticleDNNOnlyOneHotMoreSeeds/73_1_33_slugs_centralized	slugs_centralized	shields/momentum_shield	0.05
IndivQLearningParticleDNNOnlyOneHotMoreSeeds/73_1_33	slugs_decentralized	shields/momentum_shield	True	-10	True	ParticleMomentum	False	False	10	-30	Individual_Deep_Q	1.0	simple_mlp	True	0.05	2500000	43	True	IndivQLearningParticleDNNOnlyOneHotMoreSeeds/73_1_33_slugs_decentralized	slugs_decentralized	shields/momentum_shield	0.05
IndivQLearningParticleDNNOnlyOneHotMoreSeeds/73_1_33	slugs_decentralized	shields/momentum_shield	True	-10	True	ParticleMomentum	False	False	10	-30	Individual_Deep_Q	1.0	simple_mlp	True	0.05	2500000	43	True	IndivQLearningParticleDNNOnlyOneHotMoreSeeds/73_1_33_none	none		0.05
IndivQLearningParticleDNNOnlyOneHotMoreSeeds/74_1_34	slugs_decentralized	shields/momentum_shield	True	-10	True	ParticleMomentum	False	False	10	-30	Individual_Deep_Q	1.0	simple_mlp	True	0.05	2500000	44	True	IndivQLearningParticleDNNOnlyOneHotMoreSeeds/74_1_34_slugs_centralized	slugs_centralized	shields/momentum_shield	0.05
IndivQLearningParticleDNNOnlyOneHotMoreSeeds/74_1_34	slugs_decentralized	shields/momentum_shield	True	-10	True	ParticleMomentum	False	False	10	-30	Individual_Deep_Q	1.0	simple_mlp	True	0.05	2500000	44	True	IndivQLearningParticleDNNOnlyOneHotMoreSeeds/74_1_34_slugs_decentralized	slugs_decentralized	shields/momentum_shield	0.05
IndivQLearningParticleDNNOnlyOneHotMoreSeeds/74_1_34	slugs_decentralized	shields/momentum_shield	True	-10	True	ParticleMomentum	False	False	10	-30	Individual_Deep_Q	1.0	simple_mlp	True	0.05	2500000	44	True	IndivQLearningParticleDNNOnlyOneHotMoreSeeds/74_1_34_none	none		0.05
IndivQLearningParticleDNNOnlyOneHotMoreSeeds/75_1_35	slugs_decentralized	shields/momentum_shield	True	-10	True	ParticleMomentum	False	False	10	-30	Individual_Deep_Q	1.0	simple_mlp	True	0.05	2500000	45	True	IndivQLearningParticleDNNOnlyOneHotMoreSeeds/75_1_35_slugs_centralized	slugs_centralized	shields/momentum_shield	0.05
IndivQLearningParticleDNNOnlyOneHotMoreSeeds/75_1_35	slugs_decentralized	shields/momentum_shield	True	-10	True	ParticleMomentum	False	False	10	-30	Individual_Deep_Q	1.0	simple_mlp	True	0.05	2500000	45	True	IndivQLearningParticleDNNOnlyOneHotMoreSeeds/75_1_35_slugs_decentralized	slugs_decentralized	shields/momentum_shield	0.05
IndivQLearningParticleDNNOnlyOneHotMoreSeeds/75_1_35	slugs_decentralized	shields/momentum_shield	True	-10	True	ParticleMomentum	False	False	10	-30	Individual_Deep_Q	1.0	simple_mlp	True	0.05	2500000	45	True	IndivQLearningParticleDNNOnlyOneHotMoreSeeds/75_1_35_none	none		0.05
IndivQLearningParticleDNNOnlyOneHotMoreSeeds/76_1_36	slugs_decentralized	shields/momentum_shield	True	-10	True	ParticleMomentum	False	False	10	-30	Individual_Deep_Q	1.0	simple_mlp	True	0.05	2500000	46	True	IndivQLearningParticleDNNOnlyOneHotMoreSeeds/76_1_36_slugs_centralized	slugs_centralized	shields/momentum_shield	0.05
IndivQLearningParticleDNNOnlyOneHotMoreSeeds/76_1_36	slugs_decentralized	shields/momentum_shield	True	-10	True	ParticleMomentum	False	False	10	-30	Individual_Deep_Q	1.0	simple_mlp	True	0.05	2500000	46	True	IndivQLearningParticleDNNOnlyOneHotMoreSeeds/76_1_36_slugs_decentralized	slugs_decentralized	shields/momentum_shield	0.05
IndivQLearningParticleDNNOnlyOneHotMoreSeeds/76_1_36	slugs_decentralized	shields/momentum_shield	True	-10	True	ParticleMomentum	False	False	10	-30	Individual_Deep_Q	1.0	simple_mlp	True	0.05	2500000	46	True	IndivQLearningParticleDNNOnlyOneHotMoreSeeds/76_1_36_none	none		0.05
IndivQLearningParticleDNNOnlyOneHotMoreSeeds/77_1_37	slugs_decentralized	shields/momentum_shield	True	-10	True	ParticleMomentum	False	False	10	-30	Individual_Deep_Q	1.0	simple_mlp	True	0.05	2500000	47	True	IndivQLearningParticleDNNOnlyOneHotMoreSeeds/77_1_37_slugs_centralized	slugs_centralized	shields/momentum_shield	0.05
IndivQLearningParticleDNNOnlyOneHotMoreSeeds/77_1_37	slugs_decentralized	shields/momentum_shield	True	-10	True	ParticleMomentum	False	False	10	-30	Individual_Deep_Q	1.0	simple_mlp	True	0.05	2500000	47	True	IndivQLearningParticleDNNOnlyOneHotMoreSeeds/77_1_37_slugs_decentralized	slugs_decentralized	shields/momentum_shield	0.05
IndivQLearningParticleDNNOnlyOneHotMoreSeeds/77_1_37	slugs_decentralized	shields/momentum_shield	True	-10	True	ParticleMomentum	False	False	10	-30	Individual_Deep_Q	1.0	simple_mlp	True	0.05	2500000	47	True	IndivQLearningParticleDNNOnlyOneHotMoreSeeds/77_1_37_none	none		0.05
IndivQLearningParticleDNNOnlyOneHotMoreSeeds/78_1_38	slugs_decentralized	shields/momentum_shield	True	-10	True	ParticleMomentum	False	False	10	-30	Individual_Deep_Q	1.0	simple_mlp	True	0.05	2500000	48	True	IndivQLearningParticleDNNOnlyOneHotMoreSeeds/78_1_38_slugs_centralized	slugs_centralized	shields/momentum_shield	0.05
IndivQLearningParticleDNNOnlyOneHotMoreSeeds/78_1_38	slugs_decentralized	shields/momentum_shield	True	-10	True	ParticleMomentum	False	False	10	-30	Individual_Deep_Q	1.0	simple_mlp	True	0.05	2500000	48	True	IndivQLearningParticleDNNOnlyOneHotMoreSeeds/78_1_38_slugs_decentralized	slugs_decentralized	shields/momentum_shield	0.05
IndivQLearningParticleDNNOnlyOneHotMoreSeeds/78_1_38	slugs_decentralized	shields/momentum_shield	True	-10	True	ParticleMomentum	False	False	10	-30	Individual_Deep_Q	1.0	simple_mlp	True	0.05	2500000	48	True	IndivQLearningParticleDNNOnlyOneHotMoreSeeds/78_1_38_none	none		0.05
IndivQLearningParticleDNNOnlyOneHotMoreSeeds/79_1_39	slugs_decentralized	shields/momentum_shield	True	-10	True	ParticleMomentum	False	False	10	-30	Individual_Deep_Q	1.0	simple_mlp	True	0.05	2500000	49	True	IndivQLearningParticleDNNOnlyOneHotMoreSeeds/79_1_39_slugs_centralized	slugs_centralized	shields/momentum_shield	0.05
IndivQLearningParticleDNNOnlyOneHotMoreSeeds/79_1_39	slugs_decentralized	shields/momentum_shield	True	-10	True	ParticleMomentum	False	False	10	-30	Individual_Deep_Q	1.0	simple_mlp	True	0.05	2500000	49	True	IndivQLearningParticleDNNOnlyOneHotMoreSeeds/79_1_39_slugs_decentralized	slugs_decentralized	shields/momentum_shield	0.05
IndivQLearningParticleDNNOnlyOneHotMoreSeeds/79_1_39	slugs_decentralized	shields/momentum_shield	True	-10	True	ParticleMomentum	False	False	10	-30	Individual_Deep_Q	1.0	simple_mlp	True	0.05	2500000	49	True	IndivQLearningParticleDNNOnlyOneHotMoreSeeds/79_1_39_none	none		0.05
IndivQLearningParticleDNNOnlyOneHotMoreSeeds/80_2_0	none		True	-10	True	ParticleMomentum	False	False	10	-30	Individual_Deep_Q	1.0	simple_mlp	True	0.05	2500000	10	True	IndivQLearningParticleDNNOnlyOneHotMoreSeeds/80_2_0_slugs_centralized	slugs_centralized	shields/momentum_shield	0.05
IndivQLearningParticleDNNOnlyOneHotMoreSeeds/80_2_0	none		True	-10	True	ParticleMomentum	False	False	10	-30	Individual_Deep_Q	1.0	simple_mlp	True	0.05	2500000	10	True	IndivQLearningParticleDNNOnlyOneHotMoreSeeds/80_2_0_slugs_decentralized	slugs_decentralized	shields/momentum_shield	0.05
IndivQLearningParticleDNNOnlyOneHotMoreSeeds/80_2_0	none		True	-10	True	ParticleMomentum	False	False	10	-30	Individual_Deep_Q	1.0	simple_mlp	True	0.05	2500000	10	True	IndivQLearningParticleDNNOnlyOneHotMoreSeeds/80_2_0_none	none		0.05
IndivQLearningParticleDNNOnlyOneHotMoreSeeds/81_2_1	none		True	-10	True	ParticleMomentum	False	False	10	-30	Individual_Deep_Q	1.0	simple_mlp	True	0.05	2500000	11	True	IndivQLearningParticleDNNOnlyOneHotMoreSeeds/81_2_1_slugs_centralized	slugs_centralized	shields/momentum_shield	0.05
IndivQLearningParticleDNNOnlyOneHotMoreSeeds/81_2_1	none		True	-10	True	ParticleMomentum	False	False	10	-30	Individual_Deep_Q	1.0	simple_mlp	True	0.05	2500000	11	True	IndivQLearningParticleDNNOnlyOneHotMoreSeeds/81_2_1_slugs_decentralized	slugs_decentralized	shields/momentum_shield	0.05
IndivQLearningParticleDNNOnlyOneHotMoreSeeds/81_2_1	none		True	-10	True	ParticleMomentum	False	False	10	-30	Individual_Deep_Q	1.0	simple_mlp	True	0.05	2500000	11	True	IndivQLearningParticleDNNOnlyOneHotMoreSeeds/81_2_1_none	none		0.05
IndivQLearningParticleDNNOnlyOneHotMoreSeeds/82_2_2	none		True	-10	True	ParticleMomentum	False	False	10	-30	Individual_Deep_Q	1.0	simple_mlp	True	0.05	2500000	12	True	IndivQLearningParticleDNNOnlyOneHotMoreSeeds/82_2_2_slugs_centralized	slugs_centralized	shields/momentum_shield	0.05
IndivQLearningParticleDNNOnlyOneHotMoreSeeds/82_2_2	none		True	-10	True	ParticleMomentum	False	False	10	-30	Individual_Deep_Q	1.0	simple_mlp	True	0.05	2500000	12	True	IndivQLearningParticleDNNOnlyOneHotMoreSeeds/82_2_2_slugs_decentralized	slugs_decentralized	shields/momentum_shield	0.05
IndivQLearningParticleDNNOnlyOneHotMoreSeeds/82_2_2	none		True	-10	True	ParticleMomentum	False	False	10	-30	Individual_Deep_Q	1.0	simple_mlp	True	0.05	2500000	12	True	IndivQLearningParticleDNNOnlyOneHotMoreSeeds/82_2_2_none	none		0.05
IndivQLearningParticleDNNOnlyOneHotMoreSeeds/83_2_3	none		True	-10	True	ParticleMomentum	False	False	10	-30	Individual_Deep_Q	1.0	simple_mlp	True	0.05	2500000	13	True	IndivQLearningParticleDNNOnlyOneHotMoreSeeds/83_2_3_slugs_centralized	slugs_centralized	shields/momentum_shield	0.05
IndivQLearningParticleDNNOnlyOneHotMoreSeeds/83_2_3	none		True	-10	True	ParticleMomentum	False	False	10	-30	Individual_Deep_Q	1.0	simple_mlp	True	0.05	2500000	13	True	IndivQLearningParticleDNNOnlyOneHotMoreSeeds/83_2_3_slugs_decentralized	slugs_decentralized	shields/momentum_shield	0.05
IndivQLearningParticleDNNOnlyOneHotMoreSeeds/83_2_3	none		True	-10	True	ParticleMomentum	False	False	10	-30	Individual_Deep_Q	1.0	simple_mlp	True	0.05	2500000	13	True	IndivQLearningParticleDNNOnlyOneHotMoreSeeds/83_2_3_none	none		0.05
IndivQLearningParticleDNNOnlyOneHotMoreSeeds/84_2_4	none		True	-10	True	ParticleMomentum	False	False	10	-30	Individual_Deep_Q	1.0	simple_mlp	True	0.05	2500000	14	True	IndivQLearningParticleDNNOnlyOneHotMoreSeeds/84_2_4_slugs_centralized	slugs_centralized	shields/momentum_shield	0.05
IndivQLearningParticleDNNOnlyOneHotMoreSeeds/84_2_4	none		True	-10	True	ParticleMomentum	False	False	10	-30	Individual_Deep_Q	1.0	simple_mlp	True	0.05	2500000	14	True	IndivQLearningParticleDNNOnlyOneHotMoreSeeds/84_2_4_slugs_decentralized	slugs_decentralized	shields/momentum_shield	0.05
IndivQLearningParticleDNNOnlyOneHotMoreSeeds/84_2_4	none		True	-10	True	ParticleMomentum	False	False	10	-30	Individual_Deep_Q	1.0	simple_mlp	True	0.05	2500000	14	True	IndivQLearningParticleDNNOnlyOneHotMoreSeeds/84_2_4_none	none		0.05
IndivQLearningParticleDNNOnlyOneHotMoreSeeds/85_2_5	none		True	-10	True	ParticleMomentum	False	False	10	-30	Individual_Deep_Q	1.0	simple_mlp	True	0.05	2500000	15	True	IndivQLearningParticleDNNOnlyOneHotMoreSeeds/85_2_5_slugs_centralized	slugs_centralized	shields/momentum_shield	0.05
IndivQLearningParticleDNNOnlyOneHotMoreSeeds/85_2_5	none		True	-10	True	ParticleMomentum	False	False	10	-30	Individual_Deep_Q	1.0	simple_mlp	True	0.05	2500000	15	True	IndivQLearningParticleDNNOnlyOneHotMoreSeeds/85_2_5_slugs_decentralized	slugs_decentralized	shields/momentum_shield	0.05
IndivQLearningParticleDNNOnlyOneHotMoreSeeds/85_2_5	none		True	-10	True	ParticleMomentum	False	False	10	-30	Individual_Deep_Q	1.0	simple_mlp	True	0.05	2500000	15	True	IndivQLearningParticleDNNOnlyOneHotMoreSeeds/85_2_5_none	none		0.05
IndivQLearningParticleDNNOnlyOneHotMoreSeeds/86_2_6	none		True	-10	True	ParticleMomentum	False	False	10	-30	Individual_Deep_Q	1.0	simple_mlp	True	0.05	2500000	16	True	IndivQLearningParticleDNNOnlyOneHotMoreSeeds/86_2_6_slugs_centralized	slugs_centralized	shields/momentum_shield	0.05
IndivQLearningParticleDNNOnlyOneHotMoreSeeds/86_2_6	none		True	-10	True	ParticleMomentum	False	False	10	-30	Individual_Deep_Q	1.0	simple_mlp	True	0.05	2500000	16	True	IndivQLearningParticleDNNOnlyOneHotMoreSeeds/86_2_6_slugs_decentralized	slugs_decentralized	shields/momentum_shield	0.05
IndivQLearningParticleDNNOnlyOneHotMoreSeeds/86_2_6	none		True	-10	True	ParticleMomentum	False	False	10	-30	Individual_Deep_Q	1.0	simple_mlp	True	0.05	2500000	16	True	IndivQLearningParticleDNNOnlyOneHotMoreSeeds/86_2_6_none	none		0.05
IndivQLearningParticleDNNOnlyOneHotMoreSeeds/87_2_7	none		True	-10	True	ParticleMomentum	False	False	10	-30	Individual_Deep_Q	1.0	simple_mlp	True	0.05	2500000	17	True	IndivQLearningParticleDNNOnlyOneHotMoreSeeds/87_2_7_slugs_centralized	slugs_centralized	shields/momentum_shield	0.05
IndivQLearningParticleDNNOnlyOneHotMoreSeeds/87_2_7	none		True	-10	True	ParticleMomentum	False	False	10	-30	Individual_Deep_Q	1.0	simple_mlp	True	0.05	2500000	17	True	IndivQLearningParticleDNNOnlyOneHotMoreSeeds/87_2_7_slugs_decentralized	slugs_decentralized	shields/momentum_shield	0.05
IndivQLearningParticleDNNOnlyOneHotMoreSeeds/87_2_7	none		True	-10	True	ParticleMomentum	False	False	10	-30	Individual_Deep_Q	1.0	simple_mlp	True	0.05	2500000	17	True	IndivQLearningParticleDNNOnlyOneHotMoreSeeds/87_2_7_none	none		0.05
IndivQLearningParticleDNNOnlyOneHotMoreSeeds/88_2_8	none		True	-10	True	ParticleMomentum	False	False	10	-30	Individual_Deep_Q	1.0	simple_mlp	True	0.05	2500000	18	True	IndivQLearningParticleDNNOnlyOneHotMoreSeeds/88_2_8_slugs_centralized	slugs_centralized	shields/momentum_shield	0.05
IndivQLearningParticleDNNOnlyOneHotMoreSeeds/88_2_8	none		True	-10	True	ParticleMomentum	False	False	10	-30	Individual_Deep_Q	1.0	simple_mlp	True	0.05	2500000	18	True	IndivQLearningParticleDNNOnlyOneHotMoreSeeds/88_2_8_slugs_decentralized	slugs_decentralized	shields/momentum_shield	0.05
IndivQLearningParticleDNNOnlyOneHotMoreSeeds/88_2_8	none		True	-10	True	ParticleMomentum	False	False	10	-30	Individual_Deep_Q	1.0	simple_mlp	True	0.05	2500000	18	True	IndivQLearningParticleDNNOnlyOneHotMoreSeeds/88_2_8_none	none		0.05
IndivQLearningParticleDNNOnlyOneHotMoreSeeds/89_2_9	none		True	-10	True	ParticleMomentum	False	False	10	-30	Individual_Deep_Q	1.0	simple_mlp	True	0.05	2500000	19	True	IndivQLearningParticleDNNOnlyOneHotMoreSeeds/89_2_9_slugs_centralized	slugs_centralized	shields/momentum_shield	0.05
IndivQLearningParticleDNNOnlyOneHotMoreSeeds/89_2_9	none		True	-10	True	ParticleMomentum	False	False	10	-30	Individual_Deep_Q	1.0	simple_mlp	True	0.05	2500000	19	True	IndivQLearningParticleDNNOnlyOneHotMoreSeeds/89_2_9_slugs_decentralized	slugs_decentralized	shields/momentum_shield	0.05
IndivQLearningParticleDNNOnlyOneHotMoreSeeds/89_2_9	none		True	-10	True	ParticleMomentum	False	False	10	-30	Individual_Deep_Q	1.0	simple_mlp	True	0.05	2500000	19	True	IndivQLearningParticleDNNOnlyOneHotMoreSeeds/89_2_9_none	none		0.05
IndivQLearningParticleDNNOnlyOneHotMoreSeeds/90_2_10	none		True	-10	True	ParticleMomentum	False	False	10	-30	Individual_Deep_Q	1.0	simple_mlp	True	0.05	2500000	20	True	IndivQLearningParticleDNNOnlyOneHotMoreSeeds/90_2_10_slugs_centralized	slugs_centralized	shields/momentum_shield	0.05
IndivQLearningParticleDNNOnlyOneHotMoreSeeds/90_2_10	none		True	-10	True	ParticleMomentum	False	False	10	-30	Individual_Deep_Q	1.0	simple_mlp	True	0.05	2500000	20	True	IndivQLearningParticleDNNOnlyOneHotMoreSeeds/90_2_10_slugs_decentralized	slugs_decentralized	shields/momentum_shield	0.05
IndivQLearningParticleDNNOnlyOneHotMoreSeeds/90_2_10	none		True	-10	True	ParticleMomentum	False	False	10	-30	Individual_Deep_Q	1.0	simple_mlp	True	0.05	2500000	20	True	IndivQLearningParticleDNNOnlyOneHotMoreSeeds/90_2_10_none	none		0.05
IndivQLearningParticleDNNOnlyOneHotMoreSeeds/91_2_11	none		True	-10	True	ParticleMomentum	False	False	10	-30	Individual_Deep_Q	1.0	simple_mlp	True	0.05	2500000	21	True	IndivQLearningParticleDNNOnlyOneHotMoreSeeds/91_2_11_slugs_centralized	slugs_centralized	shields/momentum_shield	0.05
IndivQLearningParticleDNNOnlyOneHotMoreSeeds/91_2_11	none		True	-10	True	ParticleMomentum	False	False	10	-30	Individual_Deep_Q	1.0	simple_mlp	True	0.05	2500000	21	True	IndivQLearningParticleDNNOnlyOneHotMoreSeeds/91_2_11_slugs_decentralized	slugs_decentralized	shields/momentum_shield	0.05
IndivQLearningParticleDNNOnlyOneHotMoreSeeds/91_2_11	none		True	-10	True	ParticleMomentum	False	False	10	-30	Individual_Deep_Q	1.0	simple_mlp	True	0.05	2500000	21	True	IndivQLearningParticleDNNOnlyOneHotMoreSeeds/91_2_11_none	none		0.05
IndivQLearningParticleDNNOnlyOneHotMoreSeeds/92_2_12	none		True	-10	True	ParticleMomentum	False	False	10	-30	Individual_Deep_Q	1.0	simple_mlp	True	0.05	2500000	22	True	IndivQLearningParticleDNNOnlyOneHotMoreSeeds/92_2_12_slugs_centralized	slugs_centralized	shields/momentum_shield	0.05
IndivQLearningParticleDNNOnlyOneHotMoreSeeds/92_2_12	none		True	-10	True	ParticleMomentum	False	False	10	-30	Individual_Deep_Q	1.0	simple_mlp	True	0.05	2500000	22	True	IndivQLearningParticleDNNOnlyOneHotMoreSeeds/92_2_12_slugs_decentralized	slugs_decentralized	shields/momentum_shield	0.05
IndivQLearningParticleDNNOnlyOneHotMoreSeeds/92_2_12	none		True	-10	True	ParticleMomentum	False	False	10	-30	Individual_Deep_Q	1.0	simple_mlp	True	0.05	2500000	22	True	IndivQLearningParticleDNNOnlyOneHotMoreSeeds/92_2_12_none	none		0.05
IndivQLearningParticleDNNOnlyOneHotMoreSeeds/93_2_13	none		True	-10	True	ParticleMomentum	False	False	10	-30	Individual_Deep_Q	1.0	simple_mlp	True	0.05	2500000	23	True	IndivQLearningParticleDNNOnlyOneHotMoreSeeds/93_2_13_slugs_centralized	slugs_centralized	shields/momentum_shield	0.05
IndivQLearningParticleDNNOnlyOneHotMoreSeeds/93_2_13	none		True	-10	True	ParticleMomentum	False	False	10	-30	Individual_Deep_Q	1.0	simple_mlp	True	0.05	2500000	23	True	IndivQLearningParticleDNNOnlyOneHotMoreSeeds/93_2_13_slugs_decentralized	slugs_decentralized	shields/momentum_shield	0.05
IndivQLearningParticleDNNOnlyOneHotMoreSeeds/93_2_13	none		True	-10	True	ParticleMomentum	False	False	10	-30	Individual_Deep_Q	1.0	simple_mlp	True	0.05	2500000	23	True	IndivQLearningParticleDNNOnlyOneHotMoreSeeds/93_2_13_none	none		0.05
IndivQLearningParticleDNNOnlyOneHotMoreSeeds/94_2_14	none		True	-10	True	ParticleMomentum	False	False	10	-30	Individual_Deep_Q	1.0	simple_mlp	True	0.05	2500000	24	True	IndivQLearningParticleDNNOnlyOneHotMoreSeeds/94_2_14_slugs_centralized	slugs_centralized	shields/momentum_shield	0.05
IndivQLearningParticleDNNOnlyOneHotMoreSeeds/94_2_14	none		True	-10	True	ParticleMomentum	False	False	10	-30	Individual_Deep_Q	1.0	simple_mlp	True	0.05	2500000	24	True	IndivQLearningParticleDNNOnlyOneHotMoreSeeds/94_2_14_slugs_decentralized	slugs_decentralized	shields/momentum_shield	0.05
IndivQLearningParticleDNNOnlyOneHotMoreSeeds/94_2_14	none		True	-10	True	ParticleMomentum	False	False	10	-30	Individual_Deep_Q	1.0	simple_mlp	True	0.05	2500000	24	True	IndivQLearningParticleDNNOnlyOneHotMoreSeeds/94_2_14_none	none		0.05
IndivQLearningParticleDNNOnlyOneHotMoreSeeds/95_2_15	none		True	-10	True	ParticleMomentum	False	False	10	-30	Individual_Deep_Q	1.0	simple_mlp	True	0.05	2500000	25	True	IndivQLearningParticleDNNOnlyOneHotMoreSeeds/95_2_15_slugs_centralized	slugs_centralized	shields/momentum_shield	0.05
IndivQLearningParticleDNNOnlyOneHotMoreSeeds/95_2_15	none		True	-10	True	ParticleMomentum	False	False	10	-30	Individual_Deep_Q	1.0	simple_mlp	True	0.05	2500000	25	True	IndivQLearningParticleDNNOnlyOneHotMoreSeeds/95_2_15_slugs_decentralized	slugs_decentralized	shields/momentum_shield	0.05
IndivQLearningParticleDNNOnlyOneHotMoreSeeds/95_2_15	none		True	-10	True	ParticleMomentum	False	False	10	-30	Individual_Deep_Q	1.0	simple_mlp	True	0.05	2500000	25	True	IndivQLearningParticleDNNOnlyOneHotMoreSeeds/95_2_15_none	none		0.05
IndivQLearningParticleDNNOnlyOneHotMoreSeeds/96_2_16	none		True	-10	True	ParticleMomentum	False	False	10	-30	Individual_Deep_Q	1.0	simple_mlp	True	0.05	2500000	26	True	IndivQLearningParticleDNNOnlyOneHotMoreSeeds/96_2_16_slugs_centralized	slugs_centralized	shields/momentum_shield	0.05
IndivQLearningParticleDNNOnlyOneHotMoreSeeds/96_2_16	none		True	-10	True	ParticleMomentum	False	False	10	-30	Individual_Deep_Q	1.0	simple_mlp	True	0.05	2500000	26	True	IndivQLearningParticleDNNOnlyOneHotMoreSeeds/96_2_16_slugs_decentralized	slugs_decentralized	shields/momentum_shield	0.05
IndivQLearningParticleDNNOnlyOneHotMoreSeeds/96_2_16	none		True	-10	True	ParticleMomentum	False	False	10	-30	Individual_Deep_Q	1.0	simple_mlp	True	0.05	2500000	26	True	IndivQLearningParticleDNNOnlyOneHotMoreSeeds/96_2_16_none	none		0.05
IndivQLearningParticleDNNOnlyOneHotMoreSeeds/97_2_17	none		True	-10	True	ParticleMomentum	False	False	10	-30	Individual_Deep_Q	1.0	simple_mlp	True	0.05	2500000	27	True	IndivQLearningParticleDNNOnlyOneHotMoreSeeds/97_2_17_slugs_centralized	slugs_centralized	shields/momentum_shield	0.05
IndivQLearningParticleDNNOnlyOneHotMoreSeeds/97_2_17	none		True	-10	True	ParticleMomentum	False	False	10	-30	Individual_Deep_Q	1.0	simple_mlp	True	0.05	2500000	27	True	IndivQLearningParticleDNNOnlyOneHotMoreSeeds/97_2_17_slugs_decentralized	slugs_decentralized	shields/momentum_shield	0.05
IndivQLearningParticleDNNOnlyOneHotMoreSeeds/97_2_17	none		True	-10	True	ParticleMomentum	False	False	10	-30	Individual_Deep_Q	1.0	simple_mlp	True	0.05	2500000	27	True	IndivQLearningParticleDNNOnlyOneHotMoreSeeds/97_2_17_none	none		0.05
IndivQLearningParticleDNNOnlyOneHotMoreSeeds/98_2_18	none		True	-10	True	ParticleMomentum	False	False	10	-30	Individual_Deep_Q	1.0	simple_mlp	True	0.05	2500000	28	True	IndivQLearningParticleDNNOnlyOneHotMoreSeeds/98_2_18_slugs_centralized	slugs_centralized	shields/momentum_shield	0.05
IndivQLearningParticleDNNOnlyOneHotMoreSeeds/98_2_18	none		True	-10	True	ParticleMomentum	False	False	10	-30	Individual_Deep_Q	1.0	simple_mlp	True	0.05	2500000	28	True	IndivQLearningParticleDNNOnlyOneHotMoreSeeds/98_2_18_slugs_decentralized	slugs_decentralized	shields/momentum_shield	0.05
IndivQLearningParticleDNNOnlyOneHotMoreSeeds/98_2_18	none		True	-10	True	ParticleMomentum	False	False	10	-30	Individual_Deep_Q	1.0	simple_mlp	True	0.05	2500000	28	True	IndivQLearningParticleDNNOnlyOneHotMoreSeeds/98_2_18_none	none		0.05
IndivQLearningParticleDNNOnlyOneHotMoreSeeds/99_2_19	none		True	-10	True	ParticleMomentum	False	False	10	-30	Individual_Deep_Q	1.0	simple_mlp	True	0.05	2500000	29	True	IndivQLearningParticleDNNOnlyOneHotMoreSeeds/99_2_19_slugs_centralized	slugs_centralized	shields/momentum_shield	0.05
IndivQLearningParticleDNNOnlyOneHotMoreSeeds/99_2_19	none		True	-10	True	ParticleMomentum	False	False	10	-30	Individual_Deep_Q	1.0	simple_mlp	True	0.05	2500000	29	True	IndivQLearningParticleDNNOnlyOneHotMoreSeeds/99_2_19_slugs_decentralized	slugs_decentralized	shields/momentum_shield	0.05
IndivQLearningParticleDNNOnlyOneHotMoreSeeds/99_2_19	none		True	-10	True	ParticleMomentum	False	False	10	-30	Individual_Deep_Q	1.0	simple_mlp	True	0.05	2500000	29	True	IndivQLearningParticleDNNOnlyOneHotMoreSeeds/99_2_19_none	none		0.05
IndivQLearningParticleDNNOnlyOneHotMoreSeeds/100_2_20	none		True	-10	True	ParticleMomentum	False	False	10	-30	Individual_Deep_Q	1.0	simple_mlp	True	0.05	2500000	30	True	IndivQLearningParticleDNNOnlyOneHotMoreSeeds/100_2_20_slugs_centralized	slugs_centralized	shields/momentum_shield	0.05
IndivQLearningParticleDNNOnlyOneHotMoreSeeds/100_2_20	none		True	-10	True	ParticleMomentum	False	False	10	-30	Individual_Deep_Q	1.0	simple_mlp	True	0.05	2500000	30	True	IndivQLearningParticleDNNOnlyOneHotMoreSeeds/100_2_20_slugs_decentralized	slugs_decentralized	shields/momentum_shield	0.05
IndivQLearningParticleDNNOnlyOneHotMoreSeeds/100_2_20	none		True	-10	True	ParticleMomentum	False	False	10	-30	Individual_Deep_Q	1.0	simple_mlp	True	0.05	2500000	30	True	IndivQLearningParticleDNNOnlyOneHotMoreSeeds/100_2_20_none	none		0.05
IndivQLearningParticleDNNOnlyOneHotMoreSeeds/101_2_21	none		True	-10	True	ParticleMomentum	False	False	10	-30	Individual_Deep_Q	1.0	simple_mlp	True	0.05	2500000	31	True	IndivQLearningParticleDNNOnlyOneHotMoreSeeds/101_2_21_slugs_centralized	slugs_centralized	shields/momentum_shield	0.05
IndivQLearningParticleDNNOnlyOneHotMoreSeeds/101_2_21	none		True	-10	True	ParticleMomentum	False	False	10	-30	Individual_Deep_Q	1.0	simple_mlp	True	0.05	2500000	31	True	IndivQLearningParticleDNNOnlyOneHotMoreSeeds/101_2_21_slugs_decentralized	slugs_decentralized	shields/momentum_shield	0.05
IndivQLearningParticleDNNOnlyOneHotMoreSeeds/101_2_21	none		True	-10	True	ParticleMomentum	False	False	10	-30	Individual_Deep_Q	1.0	simple_mlp	True	0.05	2500000	31	True	IndivQLearningParticleDNNOnlyOneHotMoreSeeds/101_2_21_none	none		0.05
IndivQLearningParticleDNNOnlyOneHotMoreSeeds/102_2_22	none		True	-10	True	ParticleMomentum	False	False	10	-30	Individual_Deep_Q	1.0	simple_mlp	True	0.05	2500000	32	True	IndivQLearningParticleDNNOnlyOneHotMoreSeeds/102_2_22_slugs_centralized	slugs_centralized	shields/momentum_shield	0.05
IndivQLearningParticleDNNOnlyOneHotMoreSeeds/102_2_22	none		True	-10	True	ParticleMomentum	False	False	10	-30	Individual_Deep_Q	1.0	simple_mlp	True	0.05	2500000	32	True	IndivQLearningParticleDNNOnlyOneHotMoreSeeds/102_2_22_slugs_decentralized	slugs_decentralized	shields/momentum_shield	0.05
IndivQLearningParticleDNNOnlyOneHotMoreSeeds/102_2_22	none		True	-10	True	ParticleMomentum	False	False	10	-30	Individual_Deep_Q	1.0	simple_mlp	True	0.05	2500000	32	True	IndivQLearningParticleDNNOnlyOneHotMoreSeeds/102_2_22_none	none		0.05
IndivQLearningParticleDNNOnlyOneHotMoreSeeds/103_2_23	none		True	-10	True	ParticleMomentum	False	False	10	-30	Individual_Deep_Q	1.0	simple_mlp	True	0.05	2500000	33	True	IndivQLearningParticleDNNOnlyOneHotMoreSeeds/103_2_23_slugs_centralized	slugs_centralized	shields/momentum_shield	0.05
IndivQLearningParticleDNNOnlyOneHotMoreSeeds/103_2_23	none		True	-10	True	ParticleMomentum	False	False	10	-30	Individual_Deep_Q	1.0	simple_mlp	True	0.05	2500000	33	True	IndivQLearningParticleDNNOnlyOneHotMoreSeeds/103_2_23_slugs_decentralized	slugs_decentralized	shields/momentum_shield	0.05
IndivQLearningParticleDNNOnlyOneHotMoreSeeds/103_2_23	none		True	-10	True	ParticleMomentum	False	False	10	-30	Individual_Deep_Q	1.0	simple_mlp	True	0.05	2500000	33	True	IndivQLearningParticleDNNOnlyOneHotMoreSeeds/103_2_23_none	none		0.05
IndivQLearningParticleDNNOnlyOneHotMoreSeeds/104_2_24	none		True	-10	True	ParticleMomentum	False	False	10	-30	Individual_Deep_Q	1.0	simple_mlp	True	0.05	2500000	34	True	IndivQLearningParticleDNNOnlyOneHotMoreSeeds/104_2_24_slugs_centralized	slugs_centralized	shields/momentum_shield	0.05
IndivQLearningParticleDNNOnlyOneHotMoreSeeds/104_2_24	none		True	-10	True	ParticleMomentum	False	False	10	-30	Individual_Deep_Q	1.0	simple_mlp	True	0.05	2500000	34	True	IndivQLearningParticleDNNOnlyOneHotMoreSeeds/104_2_24_slugs_decentralized	slugs_decentralized	shields/momentum_shield	0.05
IndivQLearningParticleDNNOnlyOneHotMoreSeeds/104_2_24	none		True	-10	True	ParticleMomentum	False	False	10	-30	Individual_Deep_Q	1.0	simple_mlp	True	0.05	2500000	34	True	IndivQLearningParticleDNNOnlyOneHotMoreSeeds/104_2_24_none	none		0.05
IndivQLearningParticleDNNOnlyOneHotMoreSeeds/105_2_25	none		True	-10	True	ParticleMomentum	False	False	10	-30	Individual_Deep_Q	1.0	simple_mlp	True	0.05	2500000	35	True	IndivQLearningParticleDNNOnlyOneHotMoreSeeds/105_2_25_slugs_centralized	slugs_centralized	shields/momentum_shield	0.05
IndivQLearningParticleDNNOnlyOneHotMoreSeeds/105_2_25	none		True	-10	True	ParticleMomentum	False	False	10	-30	Individual_Deep_Q	1.0	simple_mlp	True	0.05	2500000	35	True	IndivQLearningParticleDNNOnlyOneHotMoreSeeds/105_2_25_slugs_decentralized	slugs_decentralized	shields/momentum_shield	0.05
IndivQLearningParticleDNNOnlyOneHotMoreSeeds/105_2_25	none		True	-10	True	ParticleMomentum	False	False	10	-30	Individual_Deep_Q	1.0	simple_mlp	True	0.05	2500000	35	True	IndivQLearningParticleDNNOnlyOneHotMoreSeeds/105_2_25_none	none		0.05
IndivQLearningParticleDNNOnlyOneHotMoreSeeds/106_2_26	none		True	-10	True	ParticleMomentum	False	False	10	-30	Individual_Deep_Q	1.0	simple_mlp	True	0.05	2500000	36	True	IndivQLearningParticleDNNOnlyOneHotMoreSeeds/106_2_26_slugs_centralized	slugs_centralized	shields/momentum_shield	0.05
IndivQLearningParticleDNNOnlyOneHotMoreSeeds/106_2_26	none		True	-10	True	ParticleMomentum	False	False	10	-30	Individual_Deep_Q	1.0	simple_mlp	True	0.05	2500000	36	True	IndivQLearningParticleDNNOnlyOneHotMoreSeeds/106_2_26_slugs_decentralized	slugs_decentralized	shields/momentum_shield	0.05
IndivQLearningParticleDNNOnlyOneHotMoreSeeds/106_2_26	none		True	-10	True	ParticleMomentum	False	False	10	-30	Individual_Deep_Q	1.0	simple_mlp	True	0.05	2500000	36	True	IndivQLearningParticleDNNOnlyOneHotMoreSeeds/106_2_26_none	none		0.05
IndivQLearningParticleDNNOnlyOneHotMoreSeeds/107_2_27	none		True	-10	True	ParticleMomentum	False	False	10	-30	Individual_Deep_Q	1.0	simple_mlp	True	0.05	2500000	37	True	IndivQLearningParticleDNNOnlyOneHotMoreSeeds/107_2_27_slugs_centralized	slugs_centralized	shields/momentum_shield	0.05
IndivQLearningParticleDNNOnlyOneHotMoreSeeds/107_2_27	none		True	-10	True	ParticleMomentum	False	False	10	-30	Individual_Deep_Q	1.0	simple_mlp	True	0.05	2500000	37	True	IndivQLearningParticleDNNOnlyOneHotMoreSeeds/107_2_27_slugs_decentralized	slugs_decentralized	shields/momentum_shield	0.05
IndivQLearningParticleDNNOnlyOneHotMoreSeeds/107_2_27	none		True	-10	True	ParticleMomentum	False	False	10	-30	Individual_Deep_Q	1.0	simple_mlp	True	0.05	2500000	37	True	IndivQLearningParticleDNNOnlyOneHotMoreSeeds/107_2_27_none	none		0.05
IndivQLearningParticleDNNOnlyOneHotMoreSeeds/108_2_28	none		True	-10	True	ParticleMomentum	False	False	10	-30	Individual_Deep_Q	1.0	simple_mlp	True	0.05	2500000	38	True	IndivQLearningParticleDNNOnlyOneHotMoreSeeds/108_2_28_slugs_centralized	slugs_centralized	shields/momentum_shield	0.05
IndivQLearningParticleDNNOnlyOneHotMoreSeeds/108_2_28	none		True	-10	True	ParticleMomentum	False	False	10	-30	Individual_Deep_Q	1.0	simple_mlp	True	0.05	2500000	38	True	IndivQLearningParticleDNNOnlyOneHotMoreSeeds/108_2_28_slugs_decentralized	slugs_decentralized	shields/momentum_shield	0.05
IndivQLearningParticleDNNOnlyOneHotMoreSeeds/108_2_28	none		True	-10	True	ParticleMomentum	False	False	10	-30	Individual_Deep_Q	1.0	simple_mlp	True	0.05	2500000	38	True	IndivQLearningParticleDNNOnlyOneHotMoreSeeds/108_2_28_none	none		0.05
IndivQLearningParticleDNNOnlyOneHotMoreSeeds/109_2_29	none		True	-10	True	ParticleMomentum	False	False	10	-30	Individual_Deep_Q	1.0	simple_mlp	True	0.05	2500000	39	True	IndivQLearningParticleDNNOnlyOneHotMoreSeeds/109_2_29_slugs_centralized	slugs_centralized	shields/momentum_shield	0.05
IndivQLearningParticleDNNOnlyOneHotMoreSeeds/109_2_29	none		True	-10	True	ParticleMomentum	False	False	10	-30	Individual_Deep_Q	1.0	simple_mlp	True	0.05	2500000	39	True	IndivQLearningParticleDNNOnlyOneHotMoreSeeds/109_2_29_slugs_decentralized	slugs_decentralized	shields/momentum_shield	0.05
IndivQLearningParticleDNNOnlyOneHotMoreSeeds/109_2_29	none		True	-10	True	ParticleMomentum	False	False	10	-30	Individual_Deep_Q	1.0	simple_mlp	True	0.05	2500000	39	True	IndivQLearningParticleDNNOnlyOneHotMoreSeeds/109_2_29_none	none		0.05
IndivQLearningParticleDNNOnlyOneHotMoreSeeds/110_2_30	none		True	-10	True	ParticleMomentum	False	False	10	-30	Individual_Deep_Q	1.0	simple_mlp	True	0.05	2500000	40	True	IndivQLearningParticleDNNOnlyOneHotMoreSeeds/110_2_30_slugs_centralized	slugs_centralized	shields/momentum_shield	0.05
IndivQLearningParticleDNNOnlyOneHotMoreSeeds/110_2_30	none		True	-10	True	ParticleMomentum	False	False	10	-30	Individual_Deep_Q	1.0	simple_mlp	True	0.05	2500000	40	True	IndivQLearningParticleDNNOnlyOneHotMoreSeeds/110_2_30_slugs_decentralized	slugs_decentralized	shields/momentum_shield	0.05
IndivQLearningParticleDNNOnlyOneHotMoreSeeds/110_2_30	none		True	-10	True	ParticleMomentum	False	False	10	-30	Individual_Deep_Q	1.0	simple_mlp	True	0.05	2500000	40	True	IndivQLearningParticleDNNOnlyOneHotMoreSeeds/110_2_30_none	none		0.05
IndivQLearningParticleDNNOnlyOneHotMoreSeeds/111_2_31	none		True	-10	True	ParticleMomentum	False	False	10	-30	Individual_Deep_Q	1.0	simple_mlp	True	0.05	2500000	41	True	IndivQLearningParticleDNNOnlyOneHotMoreSeeds/111_2_31_slugs_centralized	slugs_centralized	shields/momentum_shield	0.05
IndivQLearningParticleDNNOnlyOneHotMoreSeeds/111_2_31	none		True	-10	True	ParticleMomentum	False	False	10	-30	Individual_Deep_Q	1.0	simple_mlp	True	0.05	2500000	41	True	IndivQLearningParticleDNNOnlyOneHotMoreSeeds/111_2_31_slugs_decentralized	slugs_decentralized	shields/momentum_shield	0.05
IndivQLearningParticleDNNOnlyOneHotMoreSeeds/111_2_31	none		True	-10	True	ParticleMomentum	False	False	10	-30	Individual_Deep_Q	1.0	simple_mlp	True	0.05	2500000	41	True	IndivQLearningParticleDNNOnlyOneHotMoreSeeds/111_2_31_none	none		0.05
IndivQLearningParticleDNNOnlyOneHotMoreSeeds/112_2_32	none		True	-10	True	ParticleMomentum	False	False	10	-30	Individual_Deep_Q	1.0	simple_mlp	True	0.05	2500000	42	True	IndivQLearningParticleDNNOnlyOneHotMoreSeeds/112_2_32_slugs_centralized	slugs_centralized	shields/momentum_shield	0.05
IndivQLearningParticleDNNOnlyOneHotMoreSeeds/112_2_32	none		True	-10	True	ParticleMomentum	False	False	10	-30	Individual_Deep_Q	1.0	simple_mlp	True	0.05	2500000	42	True	IndivQLearningParticleDNNOnlyOneHotMoreSeeds/112_2_32_slugs_decentralized	slugs_decentralized	shields/momentum_shield	0.05
IndivQLearningParticleDNNOnlyOneHotMoreSeeds/112_2_32	none		True	-10	True	ParticleMomentum	False	False	10	-30	Individual_Deep_Q	1.0	simple_mlp	True	0.05	2500000	42	True	IndivQLearningParticleDNNOnlyOneHotMoreSeeds/112_2_32_none	none		0.05
IndivQLearningParticleDNNOnlyOneHotMoreSeeds/113_2_33	none		True	-10	True	ParticleMomentum	False	False	10	-30	Individual_Deep_Q	1.0	simple_mlp	True	0.05	2500000	43	True	IndivQLearningParticleDNNOnlyOneHotMoreSeeds/113_2_33_slugs_centralized	slugs_centralized	shields/momentum_shield	0.05
IndivQLearningParticleDNNOnlyOneHotMoreSeeds/113_2_33	none		True	-10	True	ParticleMomentum	False	False	10	-30	Individual_Deep_Q	1.0	simple_mlp	True	0.05	2500000	43	True	IndivQLearningParticleDNNOnlyOneHotMoreSeeds/113_2_33_slugs_decentralized	slugs_decentralized	shields/momentum_shield	0.05
IndivQLearningParticleDNNOnlyOneHotMoreSeeds/113_2_33	none		True	-10	True	ParticleMomentum	False	False	10	-30	Individual_Deep_Q	1.0	simple_mlp	True	0.05	2500000	43	True	IndivQLearningParticleDNNOnlyOneHotMoreSeeds/113_2_33_none	none		0.05
IndivQLearningParticleDNNOnlyOneHotMoreSeeds/114_2_34	none		True	-10	True	ParticleMomentum	False	False	10	-30	Individual_Deep_Q	1.0	simple_mlp	True	0.05	2500000	44	True	IndivQLearningParticleDNNOnlyOneHotMoreSeeds/114_2_34_slugs_centralized	slugs_centralized	shields/momentum_shield	0.05
IndivQLearningParticleDNNOnlyOneHotMoreSeeds/114_2_34	none		True	-10	True	ParticleMomentum	False	False	10	-30	Individual_Deep_Q	1.0	simple_mlp	True	0.05	2500000	44	True	IndivQLearningParticleDNNOnlyOneHotMoreSeeds/114_2_34_slugs_decentralized	slugs_decentralized	shields/momentum_shield	0.05
IndivQLearningParticleDNNOnlyOneHotMoreSeeds/114_2_34	none		True	-10	True	ParticleMomentum	False	False	10	-30	Individual_Deep_Q	1.0	simple_mlp	True	0.05	2500000	44	True	IndivQLearningParticleDNNOnlyOneHotMoreSeeds/114_2_34_none	none		0.05
IndivQLearningParticleDNNOnlyOneHotMoreSeeds/115_2_35	none		True	-10	True	ParticleMomentum	False	False	10	-30	Individual_Deep_Q	1.0	simple_mlp	True	0.05	2500000	45	True	IndivQLearningParticleDNNOnlyOneHotMoreSeeds/115_2_35_slugs_centralized	slugs_centralized	shields/momentum_shield	0.05
IndivQLearningParticleDNNOnlyOneHotMoreSeeds/115_2_35	none		True	-10	True	ParticleMomentum	False	False	10	-30	Individual_Deep_Q	1.0	simple_mlp	True	0.05	2500000	45	True	IndivQLearningParticleDNNOnlyOneHotMoreSeeds/115_2_35_slugs_decentralized	slugs_decentralized	shields/momentum_shield	0.05
IndivQLearningParticleDNNOnlyOneHotMoreSeeds/115_2_35	none		True	-10	True	ParticleMomentum	False	False	10	-30	Individual_Deep_Q	1.0	simple_mlp	True	0.05	2500000	45	True	IndivQLearningParticleDNNOnlyOneHotMoreSeeds/115_2_35_none	none		0.05
IndivQLearningParticleDNNOnlyOneHotMoreSeeds/116_2_36	none		True	-10	True	ParticleMomentum	False	False	10	-30	Individual_Deep_Q	1.0	simple_mlp	True	0.05	2500000	46	True	IndivQLearningParticleDNNOnlyOneHotMoreSeeds/116_2_36_slugs_centralized	slugs_centralized	shields/momentum_shield	0.05
IndivQLearningParticleDNNOnlyOneHotMoreSeeds/116_2_36	none		True	-10	True	ParticleMomentum	False	False	10	-30	Individual_Deep_Q	1.0	simple_mlp	True	0.05	2500000	46	True	IndivQLearningParticleDNNOnlyOneHotMoreSeeds/116_2_36_slugs_decentralized	slugs_decentralized	shields/momentum_shield	0.05
IndivQLearningParticleDNNOnlyOneHotMoreSeeds/116_2_36	none		True	-10	True	ParticleMomentum	False	False	10	-30	Individual_Deep_Q	1.0	simple_mlp	True	0.05	2500000	46	True	IndivQLearningParticleDNNOnlyOneHotMoreSeeds/116_2_36_none	none		0.05
IndivQLearningParticleDNNOnlyOneHotMoreSeeds/117_2_37	none		True	-10	True	ParticleMomentum	False	False	10	-30	Individual_Deep_Q	1.0	simple_mlp	True	0.05	2500000	47	True	IndivQLearningParticleDNNOnlyOneHotMoreSeeds/117_2_37_slugs_centralized	slugs_centralized	shields/momentum_shield	0.05
IndivQLearningParticleDNNOnlyOneHotMoreSeeds/117_2_37	none		True	-10	True	ParticleMomentum	False	False	10	-30	Individual_Deep_Q	1.0	simple_mlp	True	0.05	2500000	47	True	IndivQLearningParticleDNNOnlyOneHotMoreSeeds/117_2_37_slugs_decentralized	slugs_decentralized	shields/momentum_shield	0.05
IndivQLearningParticleDNNOnlyOneHotMoreSeeds/117_2_37	none		True	-10	True	ParticleMomentum	False	False	10	-30	Individual_Deep_Q	1.0	simple_mlp	True	0.05	2500000	47	True	IndivQLearningParticleDNNOnlyOneHotMoreSeeds/117_2_37_none	none		0.05
IndivQLearningParticleDNNOnlyOneHotMoreSeeds/118_2_38	none		True	-10	True	ParticleMomentum	False	False	10	-30	Individual_Deep_Q	1.0	simple_mlp	True	0.05	2500000	48	True	IndivQLearningParticleDNNOnlyOneHotMoreSeeds/118_2_38_slugs_centralized	slugs_centralized	shields/momentum_shield	0.05
IndivQLearningParticleDNNOnlyOneHotMoreSeeds/118_2_38	none		True	-10	True	ParticleMomentum	False	False	10	-30	Individual_Deep_Q	1.0	simple_mlp	True	0.05	2500000	48	True	IndivQLearningParticleDNNOnlyOneHotMoreSeeds/118_2_38_slugs_decentralized	slugs_decentralized	shields/momentum_shield	0.05
IndivQLearningParticleDNNOnlyOneHotMoreSeeds/118_2_38	none		True	-10	True	ParticleMomentum	False	False	10	-30	Individual_Deep_Q	1.0	simple_mlp	True	0.05	2500000	48	True	IndivQLearningParticleDNNOnlyOneHotMoreSeeds/118_2_38_none	none		0.05
IndivQLearningParticleDNNOnlyOneHotMoreSeeds/119_2_39	none		True	-10	True	ParticleMomentum	False	False	10	-30	Individual_Deep_Q	1.0	simple_mlp	True	0.05	2500000	49	True	IndivQLearningParticleDNNOnlyOneHotMoreSeeds/119_2_39_slugs_centralized	slugs_centralized	shields/momentum_shield	0.05
IndivQLearningParticleDNNOnlyOneHotMoreSeeds/119_2_39	none		True	-10	True	ParticleMomentum	False	False	10	-30	Individual_Deep_Q	1.0	simple_mlp	True	0.05	2500000	49	True	IndivQLearningParticleDNNOnlyOneHotMoreSeeds/119_2_39_slugs_decentralized	slugs_decentralized	shields/momentum_shield	0.05
IndivQLearningParticleDNNOnlyOneHotMoreSeeds/119_2_39	none		True	-10	True	ParticleMomentum	False	False	10	-30	Individual_Deep_Q	1.0	simple_mlp	True	0.05	2500000	49	True	IndivQLearningParticleDNNOnlyOneHotMoreSeeds/119_2_39_none	none		0.05
IndivQLearningParticleDNNOnlyOneHotMoreSeeds/120_3_0	slugs_centralized	shields/momentum_shield	True	-10	False	ParticleMomentum	False	False	10	-30	Individual_Deep_Q	1.0	simple_mlp	True	0.05	2500000	10	True	IndivQLearningParticleDNNOnlyOneHotMoreSeeds/120_3_0_slugs_centralized	slugs_centralized	shields/momentum_shield	0.05
IndivQLearningParticleDNNOnlyOneHotMoreSeeds/120_3_0	slugs_centralized	shields/momentum_shield	True	-10	False	ParticleMomentum	False	False	10	-30	Individual_Deep_Q	1.0	simple_mlp	True	0.05	2500000	10	True	IndivQLearningParticleDNNOnlyOneHotMoreSeeds/120_3_0_slugs_decentralized	slugs_decentralized	shields/momentum_shield	0.05
IndivQLearningParticleDNNOnlyOneHotMoreSeeds/120_3_0	slugs_centralized	shields/momentum_shield	True	-10	False	ParticleMomentum	False	False	10	-30	Individual_Deep_Q	1.0	simple_mlp	True	0.05	2500000	10	True	IndivQLearningParticleDNNOnlyOneHotMoreSeeds/120_3_0_none	none		0.05
IndivQLearningParticleDNNOnlyOneHotMoreSeeds/121_3_1	slugs_centralized	shields/momentum_shield	True	-10	False	ParticleMomentum	False	False	10	-30	Individual_Deep_Q	1.0	simple_mlp	True	0.05	2500000	11	True	IndivQLearningParticleDNNOnlyOneHotMoreSeeds/121_3_1_slugs_centralized	slugs_centralized	shields/momentum_shield	0.05
IndivQLearningParticleDNNOnlyOneHotMoreSeeds/121_3_1	slugs_centralized	shields/momentum_shield	True	-10	False	ParticleMomentum	False	False	10	-30	Individual_Deep_Q	1.0	simple_mlp	True	0.05	2500000	11	True	IndivQLearningParticleDNNOnlyOneHotMoreSeeds/121_3_1_slugs_decentralized	slugs_decentralized	shields/momentum_shield	0.05
IndivQLearningParticleDNNOnlyOneHotMoreSeeds/121_3_1	slugs_centralized	shields/momentum_shield	True	-10	False	ParticleMomentum	False	False	10	-30	Individual_Deep_Q	1.0	simple_mlp	True	0.05	2500000	11	True	IndivQLearningParticleDNNOnlyOneHotMoreSeeds/121_3_1_none	none		0.05
IndivQLearningParticleDNNOnlyOneHotMoreSeeds/122_3_2	slugs_centralized	shields/momentum_shield	True	-10	False	ParticleMomentum	False	False	10	-30	Individual_Deep_Q	1.0	simple_mlp	True	0.05	2500000	12	True	IndivQLearningParticleDNNOnlyOneHotMoreSeeds/122_3_2_slugs_centralized	slugs_centralized	shields/momentum_shield	0.05
IndivQLearningParticleDNNOnlyOneHotMoreSeeds/122_3_2	slugs_centralized	shields/momentum_shield	True	-10	False	ParticleMomentum	False	False	10	-30	Individual_Deep_Q	1.0	simple_mlp	True	0.05	2500000	12	True	IndivQLearningParticleDNNOnlyOneHotMoreSeeds/122_3_2_slugs_decentralized	slugs_decentralized	shields/momentum_shield	0.05
IndivQLearningParticleDNNOnlyOneHotMoreSeeds/122_3_2	slugs_centralized	shields/momentum_shield	True	-10	False	ParticleMomentum	False	False	10	-30	Individual_Deep_Q	1.0	simple_mlp	True	0.05	2500000	12	True	IndivQLearningParticleDNNOnlyOneHotMoreSeeds/122_3_2_none	none		0.05
IndivQLearningParticleDNNOnlyOneHotMoreSeeds/123_3_3	slugs_centralized	shields/momentum_shield	True	-10	False	ParticleMomentum	False	False	10	-30	Individual_Deep_Q	1.0	simple_mlp	True	0.05	2500000	13	True	IndivQLearningParticleDNNOnlyOneHotMoreSeeds/123_3_3_slugs_centralized	slugs_centralized	shields/momentum_shield	0.05
IndivQLearningParticleDNNOnlyOneHotMoreSeeds/123_3_3	slugs_centralized	shields/momentum_shield	True	-10	False	ParticleMomentum	False	False	10	-30	Individual_Deep_Q	1.0	simple_mlp	True	0.05	2500000	13	True	IndivQLearningParticleDNNOnlyOneHotMoreSeeds/123_3_3_slugs_decentralized	slugs_decentralized	shields/momentum_shield	0.05
IndivQLearningParticleDNNOnlyOneHotMoreSeeds/123_3_3	slugs_centralized	shields/momentum_shield	True	-10	False	ParticleMomentum	False	False	10	-30	Individual_Deep_Q	1.0	simple_mlp	True	0.05	2500000	13	True	IndivQLearningParticleDNNOnlyOneHotMoreSeeds/123_3_3_none	none		0.05
IndivQLearningParticleDNNOnlyOneHotMoreSeeds/124_3_4	slugs_centralized	shields/momentum_shield	True	-10	False	ParticleMomentum	False	False	10	-30	Individual_Deep_Q	1.0	simple_mlp	True	0.05	2500000	14	True	IndivQLearningParticleDNNOnlyOneHotMoreSeeds/124_3_4_slugs_centralized	slugs_centralized	shields/momentum_shield	0.05
IndivQLearningParticleDNNOnlyOneHotMoreSeeds/124_3_4	slugs_centralized	shields/momentum_shield	True	-10	False	ParticleMomentum	False	False	10	-30	Individual_Deep_Q	1.0	simple_mlp	True	0.05	2500000	14	True	IndivQLearningParticleDNNOnlyOneHotMoreSeeds/124_3_4_slugs_decentralized	slugs_decentralized	shields/momentum_shield	0.05
IndivQLearningParticleDNNOnlyOneHotMoreSeeds/124_3_4	slugs_centralized	shields/momentum_shield	True	-10	False	ParticleMomentum	False	False	10	-30	Individual_Deep_Q	1.0	simple_mlp	True	0.05	2500000	14	True	IndivQLearningParticleDNNOnlyOneHotMoreSeeds/124_3_4_none	none		0.05
IndivQLearningParticleDNNOnlyOneHotMoreSeeds/125_3_5	slugs_centralized	shields/momentum_shield	True	-10	False	ParticleMomentum	False	False	10	-30	Individual_Deep_Q	1.0	simple_mlp	True	0.05	2500000	15	True	IndivQLearningParticleDNNOnlyOneHotMoreSeeds/125_3_5_slugs_centralized	slugs_centralized	shields/momentum_shield	0.05
IndivQLearningParticleDNNOnlyOneHotMoreSeeds/125_3_5	slugs_centralized	shields/momentum_shield	True	-10	False	ParticleMomentum	False	False	10	-30	Individual_Deep_Q	1.0	simple_mlp	True	0.05	2500000	15	True	IndivQLearningParticleDNNOnlyOneHotMoreSeeds/125_3_5_slugs_decentralized	slugs_decentralized	shields/momentum_shield	0.05
IndivQLearningParticleDNNOnlyOneHotMoreSeeds/125_3_5	slugs_centralized	shields/momentum_shield	True	-10	False	ParticleMomentum	False	False	10	-30	Individual_Deep_Q	1.0	simple_mlp	True	0.05	2500000	15	True	IndivQLearningParticleDNNOnlyOneHotMoreSeeds/125_3_5_none	none		0.05
IndivQLearningParticleDNNOnlyOneHotMoreSeeds/126_3_6	slugs_centralized	shields/momentum_shield	True	-10	False	ParticleMomentum	False	False	10	-30	Individual_Deep_Q	1.0	simple_mlp	True	0.05	2500000	16	True	IndivQLearningParticleDNNOnlyOneHotMoreSeeds/126_3_6_slugs_centralized	slugs_centralized	shields/momentum_shield	0.05
IndivQLearningParticleDNNOnlyOneHotMoreSeeds/126_3_6	slugs_centralized	shields/momentum_shield	True	-10	False	ParticleMomentum	False	False	10	-30	Individual_Deep_Q	1.0	simple_mlp	True	0.05	2500000	16	True	IndivQLearningParticleDNNOnlyOneHotMoreSeeds/126_3_6_slugs_decentralized	slugs_decentralized	shields/momentum_shield	0.05
IndivQLearningParticleDNNOnlyOneHotMoreSeeds/126_3_6	slugs_centralized	shields/momentum_shield	True	-10	False	ParticleMomentum	False	False	10	-30	Individual_Deep_Q	1.0	simple_mlp	True	0.05	2500000	16	True	IndivQLearningParticleDNNOnlyOneHotMoreSeeds/126_3_6_none	none		0.05
IndivQLearningParticleDNNOnlyOneHotMoreSeeds/127_3_7	slugs_centralized	shields/momentum_shield	True	-10	False	ParticleMomentum	False	False	10	-30	Individual_Deep_Q	1.0	simple_mlp	True	0.05	2500000	17	True	IndivQLearningParticleDNNOnlyOneHotMoreSeeds/127_3_7_slugs_centralized	slugs_centralized	shields/momentum_shield	0.05
IndivQLearningParticleDNNOnlyOneHotMoreSeeds/127_3_7	slugs_centralized	shields/momentum_shield	True	-10	False	ParticleMomentum	False	False	10	-30	Individual_Deep_Q	1.0	simple_mlp	True	0.05	2500000	17	True	IndivQLearningParticleDNNOnlyOneHotMoreSeeds/127_3_7_slugs_decentralized	slugs_decentralized	shields/momentum_shield	0.05
IndivQLearningParticleDNNOnlyOneHotMoreSeeds/127_3_7	slugs_centralized	shields/momentum_shield	True	-10	False	ParticleMomentum	False	False	10	-30	Individual_Deep_Q	1.0	simple_mlp	True	0.05	2500000	17	True	IndivQLearningParticleDNNOnlyOneHotMoreSeeds/127_3_7_none	none		0.05
IndivQLearningParticleDNNOnlyOneHotMoreSeeds/128_3_8	slugs_centralized	shields/momentum_shield	True	-10	False	ParticleMomentum	False	False	10	-30	Individual_Deep_Q	1.0	simple_mlp	True	0.05	2500000	18	True	IndivQLearningParticleDNNOnlyOneHotMoreSeeds/128_3_8_slugs_centralized	slugs_centralized	shields/momentum_shield	0.05
IndivQLearningParticleDNNOnlyOneHotMoreSeeds/128_3_8	slugs_centralized	shields/momentum_shield	True	-10	False	ParticleMomentum	False	False	10	-30	Individual_Deep_Q	1.0	simple_mlp	True	0.05	2500000	18	True	IndivQLearningParticleDNNOnlyOneHotMoreSeeds/128_3_8_slugs_decentralized	slugs_decentralized	shields/momentum_shield	0.05
IndivQLearningParticleDNNOnlyOneHotMoreSeeds/128_3_8	slugs_centralized	shields/momentum_shield	True	-10	False	ParticleMomentum	False	False	10	-30	Individual_Deep_Q	1.0	simple_mlp	True	0.05	2500000	18	True	IndivQLearningParticleDNNOnlyOneHotMoreSeeds/128_3_8_none	none		0.05
IndivQLearningParticleDNNOnlyOneHotMoreSeeds/129_3_9	slugs_centralized	shields/momentum_shield	True	-10	False	ParticleMomentum	False	False	10	-30	Individual_Deep_Q	1.0	simple_mlp	True	0.05	2500000	19	True	IndivQLearningParticleDNNOnlyOneHotMoreSeeds/129_3_9_slugs_centralized	slugs_centralized	shields/momentum_shield	0.05
IndivQLearningParticleDNNOnlyOneHotMoreSeeds/129_3_9	slugs_centralized	shields/momentum_shield	True	-10	False	ParticleMomentum	False	False	10	-30	Individual_Deep_Q	1.0	simple_mlp	True	0.05	2500000	19	True	IndivQLearningParticleDNNOnlyOneHotMoreSeeds/129_3_9_slugs_decentralized	slugs_decentralized	shields/momentum_shield	0.05
IndivQLearningParticleDNNOnlyOneHotMoreSeeds/129_3_9	slugs_centralized	shields/momentum_shield	True	-10	False	ParticleMomentum	False	False	10	-30	Individual_Deep_Q	1.0	simple_mlp	True	0.05	2500000	19	True	IndivQLearningParticleDNNOnlyOneHotMoreSeeds/129_3_9_none	none		0.05
IndivQLearningParticleDNNOnlyOneHotMoreSeeds/130_3_10	slugs_centralized	shields/momentum_shield	True	-10	False	ParticleMomentum	False	False	10	-30	Individual_Deep_Q	1.0	simple_mlp	True	0.05	2500000	20	True	IndivQLearningParticleDNNOnlyOneHotMoreSeeds/130_3_10_slugs_centralized	slugs_centralized	shields/momentum_shield	0.05
IndivQLearningParticleDNNOnlyOneHotMoreSeeds/130_3_10	slugs_centralized	shields/momentum_shield	True	-10	False	ParticleMomentum	False	False	10	-30	Individual_Deep_Q	1.0	simple_mlp	True	0.05	2500000	20	True	IndivQLearningParticleDNNOnlyOneHotMoreSeeds/130_3_10_slugs_decentralized	slugs_decentralized	shields/momentum_shield	0.05
IndivQLearningParticleDNNOnlyOneHotMoreSeeds/130_3_10	slugs_centralized	shields/momentum_shield	True	-10	False	ParticleMomentum	False	False	10	-30	Individual_Deep_Q	1.0	simple_mlp	True	0.05	2500000	20	True	IndivQLearningParticleDNNOnlyOneHotMoreSeeds/130_3_10_none	none		0.05
IndivQLearningParticleDNNOnlyOneHotMoreSeeds/131_3_11	slugs_centralized	shields/momentum_shield	True	-10	False	ParticleMomentum	False	False	10	-30	Individual_Deep_Q	1.0	simple_mlp	True	0.05	2500000	21	True	IndivQLearningParticleDNNOnlyOneHotMoreSeeds/131_3_11_slugs_centralized	slugs_centralized	shields/momentum_shield	0.05
IndivQLearningParticleDNNOnlyOneHotMoreSeeds/131_3_11	slugs_centralized	shields/momentum_shield	True	-10	False	ParticleMomentum	False	False	10	-30	Individual_Deep_Q	1.0	simple_mlp	True	0.05	2500000	21	True	IndivQLearningParticleDNNOnlyOneHotMoreSeeds/131_3_11_slugs_decentralized	slugs_decentralized	shields/momentum_shield	0.05
IndivQLearningParticleDNNOnlyOneHotMoreSeeds/131_3_11	slugs_centralized	shields/momentum_shield	True	-10	False	ParticleMomentum	False	False	10	-30	Individual_Deep_Q	1.0	simple_mlp	True	0.05	2500000	21	True	IndivQLearningParticleDNNOnlyOneHotMoreSeeds/131_3_11_none	none		0.05
IndivQLearningParticleDNNOnlyOneHotMoreSeeds/132_3_12	slugs_centralized	shields/momentum_shield	True	-10	False	ParticleMomentum	False	False	10	-30	Individual_Deep_Q	1.0	simple_mlp	True	0.05	2500000	22	True	IndivQLearningParticleDNNOnlyOneHotMoreSeeds/132_3_12_slugs_centralized	slugs_centralized	shields/momentum_shield	0.05
IndivQLearningParticleDNNOnlyOneHotMoreSeeds/132_3_12	slugs_centralized	shields/momentum_shield	True	-10	False	ParticleMomentum	False	False	10	-30	Individual_Deep_Q	1.0	simple_mlp	True	0.05	2500000	22	True	IndivQLearningParticleDNNOnlyOneHotMoreSeeds/132_3_12_slugs_decentralized	slugs_decentralized	shields/momentum_shield	0.05
IndivQLearningParticleDNNOnlyOneHotMoreSeeds/132_3_12	slugs_centralized	shields/momentum_shield	True	-10	False	ParticleMomentum	False	False	10	-30	Individual_Deep_Q	1.0	simple_mlp	True	0.05	2500000	22	True	IndivQLearningParticleDNNOnlyOneHotMoreSeeds/132_3_12_none	none		0.05
IndivQLearningParticleDNNOnlyOneHotMoreSeeds/133_3_13	slugs_centralized	shields/momentum_shield	True	-10	False	ParticleMomentum	False	False	10	-30	Individual_Deep_Q	1.0	simple_mlp	True	0.05	2500000	23	True	IndivQLearningParticleDNNOnlyOneHotMoreSeeds/133_3_13_slugs_centralized	slugs_centralized	shields/momentum_shield	0.05
IndivQLearningParticleDNNOnlyOneHotMoreSeeds/133_3_13	slugs_centralized	shields/momentum_shield	True	-10	False	ParticleMomentum	False	False	10	-30	Individual_Deep_Q	1.0	simple_mlp	True	0.05	2500000	23	True	IndivQLearningParticleDNNOnlyOneHotMoreSeeds/133_3_13_slugs_decentralized	slugs_decentralized	shields/momentum_shield	0.05
IndivQLearningParticleDNNOnlyOneHotMoreSeeds/133_3_13	slugs_centralized	shields/momentum_shield	True	-10	False	ParticleMomentum	False	False	10	-30	Individual_Deep_Q	1.0	simple_mlp	True	0.05	2500000	23	True	IndivQLearningParticleDNNOnlyOneHotMoreSeeds/133_3_13_none	none		0.05
IndivQLearningParticleDNNOnlyOneHotMoreSeeds/134_3_14	slugs_centralized	shields/momentum_shield	True	-10	False	ParticleMomentum	False	False	10	-30	Individual_Deep_Q	1.0	simple_mlp	True	0.05	2500000	24	True	IndivQLearningParticleDNNOnlyOneHotMoreSeeds/134_3_14_slugs_centralized	slugs_centralized	shields/momentum_shield	0.05
IndivQLearningParticleDNNOnlyOneHotMoreSeeds/134_3_14	slugs_centralized	shields/momentum_shield	True	-10	False	ParticleMomentum	False	False	10	-30	Individual_Deep_Q	1.0	simple_mlp	True	0.05	2500000	24	True	IndivQLearningParticleDNNOnlyOneHotMoreSeeds/134_3_14_slugs_decentralized	slugs_decentralized	shields/momentum_shield	0.05
IndivQLearningParticleDNNOnlyOneHotMoreSeeds/134_3_14	slugs_centralized	shields/momentum_shield	True	-10	False	ParticleMomentum	False	False	10	-30	Individual_Deep_Q	1.0	simple_mlp	True	0.05	2500000	24	True	IndivQLearningParticleDNNOnlyOneHotMoreSeeds/134_3_14_none	none		0.05
IndivQLearningParticleDNNOnlyOneHotMoreSeeds/135_3_15	slugs_centralized	shields/momentum_shield	True	-10	False	ParticleMomentum	False	False	10	-30	Individual_Deep_Q	1.0	simple_mlp	True	0.05	2500000	25	True	IndivQLearningParticleDNNOnlyOneHotMoreSeeds/135_3_15_slugs_centralized	slugs_centralized	shields/momentum_shield	0.05
IndivQLearningParticleDNNOnlyOneHotMoreSeeds/135_3_15	slugs_centralized	shields/momentum_shield	True	-10	False	ParticleMomentum	False	False	10	-30	Individual_Deep_Q	1.0	simple_mlp	True	0.05	2500000	25	True	IndivQLearningParticleDNNOnlyOneHotMoreSeeds/135_3_15_slugs_decentralized	slugs_decentralized	shields/momentum_shield	0.05
IndivQLearningParticleDNNOnlyOneHotMoreSeeds/135_3_15	slugs_centralized	shields/momentum_shield	True	-10	False	ParticleMomentum	False	False	10	-30	Individual_Deep_Q	1.0	simple_mlp	True	0.05	2500000	25	True	IndivQLearningParticleDNNOnlyOneHotMoreSeeds/135_3_15_none	none		0.05
IndivQLearningParticleDNNOnlyOneHotMoreSeeds/136_3_16	slugs_centralized	shields/momentum_shield	True	-10	False	ParticleMomentum	False	False	10	-30	Individual_Deep_Q	1.0	simple_mlp	True	0.05	2500000	26	True	IndivQLearningParticleDNNOnlyOneHotMoreSeeds/136_3_16_slugs_centralized	slugs_centralized	shields/momentum_shield	0.05
IndivQLearningParticleDNNOnlyOneHotMoreSeeds/136_3_16	slugs_centralized	shields/momentum_shield	True	-10	False	ParticleMomentum	False	False	10	-30	Individual_Deep_Q	1.0	simple_mlp	True	0.05	2500000	26	True	IndivQLearningParticleDNNOnlyOneHotMoreSeeds/136_3_16_slugs_decentralized	slugs_decentralized	shields/momentum_shield	0.05
IndivQLearningParticleDNNOnlyOneHotMoreSeeds/136_3_16	slugs_centralized	shields/momentum_shield	True	-10	False	ParticleMomentum	False	False	10	-30	Individual_Deep_Q	1.0	simple_mlp	True	0.05	2500000	26	True	IndivQLearningParticleDNNOnlyOneHotMoreSeeds/136_3_16_none	none		0.05
IndivQLearningParticleDNNOnlyOneHotMoreSeeds/137_3_17	slugs_centralized	shields/momentum_shield	True	-10	False	ParticleMomentum	False	False	10	-30	Individual_Deep_Q	1.0	simple_mlp	True	0.05	2500000	27	True	IndivQLearningParticleDNNOnlyOneHotMoreSeeds/137_3_17_slugs_centralized	slugs_centralized	shields/momentum_shield	0.05
IndivQLearningParticleDNNOnlyOneHotMoreSeeds/137_3_17	slugs_centralized	shields/momentum_shield	True	-10	False	ParticleMomentum	False	False	10	-30	Individual_Deep_Q	1.0	simple_mlp	True	0.05	2500000	27	True	IndivQLearningParticleDNNOnlyOneHotMoreSeeds/137_3_17_slugs_decentralized	slugs_decentralized	shields/momentum_shield	0.05
IndivQLearningParticleDNNOnlyOneHotMoreSeeds/137_3_17	slugs_centralized	shields/momentum_shield	True	-10	False	ParticleMomentum	False	False	10	-30	Individual_Deep_Q	1.0	simple_mlp	True	0.05	2500000	27	True	IndivQLearningParticleDNNOnlyOneHotMoreSeeds/137_3_17_none	none		0.05
IndivQLearningParticleDNNOnlyOneHotMoreSeeds/138_3_18	slugs_centralized	shields/momentum_shield	True	-10	False	ParticleMomentum	False	False	10	-30	Individual_Deep_Q	1.0	simple_mlp	True	0.05	2500000	28	True	IndivQLearningParticleDNNOnlyOneHotMoreSeeds/138_3_18_slugs_centralized	slugs_centralized	shields/momentum_shield	0.05
IndivQLearningParticleDNNOnlyOneHotMoreSeeds/138_3_18	slugs_centralized	shields/momentum_shield	True	-10	False	ParticleMomentum	False	False	10	-30	Individual_Deep_Q	1.0	simple_mlp	True	0.05	2500000	28	True	IndivQLearningParticleDNNOnlyOneHotMoreSeeds/138_3_18_slugs_decentralized	slugs_decentralized	shields/momentum_shield	0.05
IndivQLearningParticleDNNOnlyOneHotMoreSeeds/138_3_18	slugs_centralized	shields/momentum_shield	True	-10	False	ParticleMomentum	False	False	10	-30	Individual_Deep_Q	1.0	simple_mlp	True	0.05	2500000	28	True	IndivQLearningParticleDNNOnlyOneHotMoreSeeds/138_3_18_none	none		0.05
IndivQLearningParticleDNNOnlyOneHotMoreSeeds/139_3_19	slugs_centralized	shields/momentum_shield	True	-10	False	ParticleMomentum	False	False	10	-30	Individual_Deep_Q	1.0	simple_mlp	True	0.05	2500000	29	True	IndivQLearningParticleDNNOnlyOneHotMoreSeeds/139_3_19_slugs_centralized	slugs_centralized	shields/momentum_shield	0.05
IndivQLearningParticleDNNOnlyOneHotMoreSeeds/139_3_19	slugs_centralized	shields/momentum_shield	True	-10	False	ParticleMomentum	False	False	10	-30	Individual_Deep_Q	1.0	simple_mlp	True	0.05	2500000	29	True	IndivQLearningParticleDNNOnlyOneHotMoreSeeds/139_3_19_slugs_decentralized	slugs_decentralized	shields/momentum_shield	0.05
IndivQLearningParticleDNNOnlyOneHotMoreSeeds/139_3_19	slugs_centralized	shields/momentum_shield	True	-10	False	ParticleMomentum	False	False	10	-30	Individual_Deep_Q	1.0	simple_mlp	True	0.05	2500000	29	True	IndivQLearningParticleDNNOnlyOneHotMoreSeeds/139_3_19_none	none		0.05
IndivQLearningParticleDNNOnlyOneHotMoreSeeds/140_3_20	slugs_centralized	shields/momentum_shield	True	-10	False	ParticleMomentum	False	False	10	-30	Individual_Deep_Q	1.0	simple_mlp	True	0.05	2500000	30	True	IndivQLearningParticleDNNOnlyOneHotMoreSeeds/140_3_20_slugs_centralized	slugs_centralized	shields/momentum_shield	0.05
IndivQLearningParticleDNNOnlyOneHotMoreSeeds/140_3_20	slugs_centralized	shields/momentum_shield	True	-10	False	ParticleMomentum	False	False	10	-30	Individual_Deep_Q	1.0	simple_mlp	True	0.05	2500000	30	True	IndivQLearningParticleDNNOnlyOneHotMoreSeeds/140_3_20_slugs_decentralized	slugs_decentralized	shields/momentum_shield	0.05
IndivQLearningParticleDNNOnlyOneHotMoreSeeds/140_3_20	slugs_centralized	shields/momentum_shield	True	-10	False	ParticleMomentum	False	False	10	-30	Individual_Deep_Q	1.0	simple_mlp	True	0.05	2500000	30	True	IndivQLearningParticleDNNOnlyOneHotMoreSeeds/140_3_20_none	none		0.05
IndivQLearningParticleDNNOnlyOneHotMoreSeeds/141_3_21	slugs_centralized	shields/momentum_shield	True	-10	False	ParticleMomentum	False	False	10	-30	Individual_Deep_Q	1.0	simple_mlp	True	0.05	2500000	31	True	IndivQLearningParticleDNNOnlyOneHotMoreSeeds/141_3_21_slugs_centralized	slugs_centralized	shields/momentum_shield	0.05
IndivQLearningParticleDNNOnlyOneHotMoreSeeds/141_3_21	slugs_centralized	shields/momentum_shield	True	-10	False	ParticleMomentum	False	False	10	-30	Individual_Deep_Q	1.0	simple_mlp	True	0.05	2500000	31	True	IndivQLearningParticleDNNOnlyOneHotMoreSeeds/141_3_21_slugs_decentralized	slugs_decentralized	shields/momentum_shield	0.05
IndivQLearningParticleDNNOnlyOneHotMoreSeeds/141_3_21	slugs_centralized	shields/momentum_shield	True	-10	False	ParticleMomentum	False	False	10	-30	Individual_Deep_Q	1.0	simple_mlp	True	0.05	2500000	31	True	IndivQLearningParticleDNNOnlyOneHotMoreSeeds/141_3_21_none	none		0.05
IndivQLearningParticleDNNOnlyOneHotMoreSeeds/142_3_22	slugs_centralized	shields/momentum_shield	True	-10	False	ParticleMomentum	False	False	10	-30	Individual_Deep_Q	1.0	simple_mlp	True	0.05	2500000	32	True	IndivQLearningParticleDNNOnlyOneHotMoreSeeds/142_3_22_slugs_centralized	slugs_centralized	shields/momentum_shield	0.05
IndivQLearningParticleDNNOnlyOneHotMoreSeeds/142_3_22	slugs_centralized	shields/momentum_shield	True	-10	False	ParticleMomentum	False	False	10	-30	Individual_Deep_Q	1.0	simple_mlp	True	0.05	2500000	32	True	IndivQLearningParticleDNNOnlyOneHotMoreSeeds/142_3_22_slugs_decentralized	slugs_decentralized	shields/momentum_shield	0.05
IndivQLearningParticleDNNOnlyOneHotMoreSeeds/142_3_22	slugs_centralized	shields/momentum_shield	True	-10	False	ParticleMomentum	False	False	10	-30	Individual_Deep_Q	1.0	simple_mlp	True	0.05	2500000	32	True	IndivQLearningParticleDNNOnlyOneHotMoreSeeds/142_3_22_none	none		0.05
IndivQLearningParticleDNNOnlyOneHotMoreSeeds/143_3_23	slugs_centralized	shields/momentum_shield	True	-10	False	ParticleMomentum	False	False	10	-30	Individual_Deep_Q	1.0	simple_mlp	True	0.05	2500000	33	True	IndivQLearningParticleDNNOnlyOneHotMoreSeeds/143_3_23_slugs_centralized	slugs_centralized	shields/momentum_shield	0.05
IndivQLearningParticleDNNOnlyOneHotMoreSeeds/143_3_23	slugs_centralized	shields/momentum_shield	True	-10	False	ParticleMomentum	False	False	10	-30	Individual_Deep_Q	1.0	simple_mlp	True	0.05	2500000	33	True	IndivQLearningParticleDNNOnlyOneHotMoreSeeds/143_3_23_slugs_decentralized	slugs_decentralized	shields/momentum_shield	0.05
IndivQLearningParticleDNNOnlyOneHotMoreSeeds/143_3_23	slugs_centralized	shields/momentum_shield	True	-10	False	ParticleMomentum	False	False	10	-30	Individual_Deep_Q	1.0	simple_mlp	True	0.05	2500000	33	True	IndivQLearningParticleDNNOnlyOneHotMoreSeeds/143_3_23_none	none		0.05
IndivQLearningParticleDNNOnlyOneHotMoreSeeds/144_3_24	slugs_centralized	shields/momentum_shield	True	-10	False	ParticleMomentum	False	False	10	-30	Individual_Deep_Q	1.0	simple_mlp	True	0.05	2500000	34	True	IndivQLearningParticleDNNOnlyOneHotMoreSeeds/144_3_24_slugs_centralized	slugs_centralized	shields/momentum_shield	0.05
IndivQLearningParticleDNNOnlyOneHotMoreSeeds/144_3_24	slugs_centralized	shields/momentum_shield	True	-10	False	ParticleMomentum	False	False	10	-30	Individual_Deep_Q	1.0	simple_mlp	True	0.05	2500000	34	True	IndivQLearningParticleDNNOnlyOneHotMoreSeeds/144_3_24_slugs_decentralized	slugs_decentralized	shields/momentum_shield	0.05
IndivQLearningParticleDNNOnlyOneHotMoreSeeds/144_3_24	slugs_centralized	shields/momentum_shield	True	-10	False	ParticleMomentum	False	False	10	-30	Individual_Deep_Q	1.0	simple_mlp	True	0.05	2500000	34	True	IndivQLearningParticleDNNOnlyOneHotMoreSeeds/144_3_24_none	none		0.05
IndivQLearningParticleDNNOnlyOneHotMoreSeeds/145_3_25	slugs_centralized	shields/momentum_shield	True	-10	False	ParticleMomentum	False	False	10	-30	Individual_Deep_Q	1.0	simple_mlp	True	0.05	2500000	35	True	IndivQLearningParticleDNNOnlyOneHotMoreSeeds/145_3_25_slugs_centralized	slugs_centralized	shields/momentum_shield	0.05
IndivQLearningParticleDNNOnlyOneHotMoreSeeds/145_3_25	slugs_centralized	shields/momentum_shield	True	-10	False	ParticleMomentum	False	False	10	-30	Individual_Deep_Q	1.0	simple_mlp	True	0.05	2500000	35	True	IndivQLearningParticleDNNOnlyOneHotMoreSeeds/145_3_25_slugs_decentralized	slugs_decentralized	shields/momentum_shield	0.05
IndivQLearningParticleDNNOnlyOneHotMoreSeeds/145_3_25	slugs_centralized	shields/momentum_shield	True	-10	False	ParticleMomentum	False	False	10	-30	Individual_Deep_Q	1.0	simple_mlp	True	0.05	2500000	35	True	IndivQLearningParticleDNNOnlyOneHotMoreSeeds/145_3_25_none	none		0.05
IndivQLearningParticleDNNOnlyOneHotMoreSeeds/146_3_26	slugs_centralized	shields/momentum_shield	True	-10	False	ParticleMomentum	False	False	10	-30	Individual_Deep_Q	1.0	simple_mlp	True	0.05	2500000	36	True	IndivQLearningParticleDNNOnlyOneHotMoreSeeds/146_3_26_slugs_centralized	slugs_centralized	shields/momentum_shield	0.05
IndivQLearningParticleDNNOnlyOneHotMoreSeeds/146_3_26	slugs_centralized	shields/momentum_shield	True	-10	False	ParticleMomentum	False	False	10	-30	Individual_Deep_Q	1.0	simple_mlp	True	0.05	2500000	36	True	IndivQLearningParticleDNNOnlyOneHotMoreSeeds/146_3_26_slugs_decentralized	slugs_decentralized	shields/momentum_shield	0.05
IndivQLearningParticleDNNOnlyOneHotMoreSeeds/146_3_26	slugs_centralized	shields/momentum_shield	True	-10	False	ParticleMomentum	False	False	10	-30	Individual_Deep_Q	1.0	simple_mlp	True	0.05	2500000	36	True	IndivQLearningParticleDNNOnlyOneHotMoreSeeds/146_3_26_none	none		0.05
IndivQLearningParticleDNNOnlyOneHotMoreSeeds/147_3_27	slugs_centralized	shields/momentum_shield	True	-10	False	ParticleMomentum	False	False	10	-30	Individual_Deep_Q	1.0	simple_mlp	True	0.05	2500000	37	True	IndivQLearningParticleDNNOnlyOneHotMoreSeeds/147_3_27_slugs_centralized	slugs_centralized	shields/momentum_shield	0.05
IndivQLearningParticleDNNOnlyOneHotMoreSeeds/147_3_27	slugs_centralized	shields/momentum_shield	True	-10	False	ParticleMomentum	False	False	10	-30	Individual_Deep_Q	1.0	simple_mlp	True	0.05	2500000	37	True	IndivQLearningParticleDNNOnlyOneHotMoreSeeds/147_3_27_slugs_decentralized	slugs_decentralized	shields/momentum_shield	0.05
IndivQLearningParticleDNNOnlyOneHotMoreSeeds/147_3_27	slugs_centralized	shields/momentum_shield	True	-10	False	ParticleMomentum	False	False	10	-30	Individual_Deep_Q	1.0	simple_mlp	True	0.05	2500000	37	True	IndivQLearningParticleDNNOnlyOneHotMoreSeeds/147_3_27_none	none		0.05
IndivQLearningParticleDNNOnlyOneHotMoreSeeds/148_3_28	slugs_centralized	shields/momentum_shield	True	-10	False	ParticleMomentum	False	False	10	-30	Individual_Deep_Q	1.0	simple_mlp	True	0.05	2500000	38	True	IndivQLearningParticleDNNOnlyOneHotMoreSeeds/148_3_28_slugs_centralized	slugs_centralized	shields/momentum_shield	0.05
IndivQLearningParticleDNNOnlyOneHotMoreSeeds/148_3_28	slugs_centralized	shields/momentum_shield	True	-10	False	ParticleMomentum	False	False	10	-30	Individual_Deep_Q	1.0	simple_mlp	True	0.05	2500000	38	True	IndivQLearningParticleDNNOnlyOneHotMoreSeeds/148_3_28_slugs_decentralized	slugs_decentralized	shields/momentum_shield	0.05
IndivQLearningParticleDNNOnlyOneHotMoreSeeds/148_3_28	slugs_centralized	shields/momentum_shield	True	-10	False	ParticleMomentum	False	False	10	-30	Individual_Deep_Q	1.0	simple_mlp	True	0.05	2500000	38	True	IndivQLearningParticleDNNOnlyOneHotMoreSeeds/148_3_28_none	none		0.05
IndivQLearningParticleDNNOnlyOneHotMoreSeeds/149_3_29	slugs_centralized	shields/momentum_shield	True	-10	False	ParticleMomentum	False	False	10	-30	Individual_Deep_Q	1.0	simple_mlp	True	0.05	2500000	39	True	IndivQLearningParticleDNNOnlyOneHotMoreSeeds/149_3_29_slugs_centralized	slugs_centralized	shields/momentum_shield	0.05
IndivQLearningParticleDNNOnlyOneHotMoreSeeds/149_3_29	slugs_centralized	shields/momentum_shield	True	-10	False	ParticleMomentum	False	False	10	-30	Individual_Deep_Q	1.0	simple_mlp	True	0.05	2500000	39	True	IndivQLearningParticleDNNOnlyOneHotMoreSeeds/149_3_29_slugs_decentralized	slugs_decentralized	shields/momentum_shield	0.05
IndivQLearningParticleDNNOnlyOneHotMoreSeeds/149_3_29	slugs_centralized	shields/momentum_shield	True	-10	False	ParticleMomentum	False	False	10	-30	Individual_Deep_Q	1.0	simple_mlp	True	0.05	2500000	39	True	IndivQLearningParticleDNNOnlyOneHotMoreSeeds/149_3_29_none	none		0.05
IndivQLearningParticleDNNOnlyOneHotMoreSeeds/150_3_30	slugs_centralized	shields/momentum_shield	True	-10	False	ParticleMomentum	False	False	10	-30	Individual_Deep_Q	1.0	simple_mlp	True	0.05	2500000	40	True	IndivQLearningParticleDNNOnlyOneHotMoreSeeds/150_3_30_slugs_centralized	slugs_centralized	shields/momentum_shield	0.05
IndivQLearningParticleDNNOnlyOneHotMoreSeeds/150_3_30	slugs_centralized	shields/momentum_shield	True	-10	False	ParticleMomentum	False	False	10	-30	Individual_Deep_Q	1.0	simple_mlp	True	0.05	2500000	40	True	IndivQLearningParticleDNNOnlyOneHotMoreSeeds/150_3_30_slugs_decentralized	slugs_decentralized	shields/momentum_shield	0.05
IndivQLearningParticleDNNOnlyOneHotMoreSeeds/150_3_30	slugs_centralized	shields/momentum_shield	True	-10	False	ParticleMomentum	False	False	10	-30	Individual_Deep_Q	1.0	simple_mlp	True	0.05	2500000	40	True	IndivQLearningParticleDNNOnlyOneHotMoreSeeds/150_3_30_none	none		0.05
IndivQLearningParticleDNNOnlyOneHotMoreSeeds/151_3_31	slugs_centralized	shields/momentum_shield	True	-10	False	ParticleMomentum	False	False	10	-30	Individual_Deep_Q	1.0	simple_mlp	True	0.05	2500000	41	True	IndivQLearningParticleDNNOnlyOneHotMoreSeeds/151_3_31_slugs_centralized	slugs_centralized	shields/momentum_shield	0.05
IndivQLearningParticleDNNOnlyOneHotMoreSeeds/151_3_31	slugs_centralized	shields/momentum_shield	True	-10	False	ParticleMomentum	False	False	10	-30	Individual_Deep_Q	1.0	simple_mlp	True	0.05	2500000	41	True	IndivQLearningParticleDNNOnlyOneHotMoreSeeds/151_3_31_slugs_decentralized	slugs_decentralized	shields/momentum_shield	0.05
IndivQLearningParticleDNNOnlyOneHotMoreSeeds/151_3_31	slugs_centralized	shields/momentum_shield	True	-10	False	ParticleMomentum	False	False	10	-30	Individual_Deep_Q	1.0	simple_mlp	True	0.05	2500000	41	True	IndivQLearningParticleDNNOnlyOneHotMoreSeeds/151_3_31_none	none		0.05
IndivQLearningParticleDNNOnlyOneHotMoreSeeds/152_3_32	slugs_centralized	shields/momentum_shield	True	-10	False	ParticleMomentum	False	False	10	-30	Individual_Deep_Q	1.0	simple_mlp	True	0.05	2500000	42	True	IndivQLearningParticleDNNOnlyOneHotMoreSeeds/152_3_32_slugs_centralized	slugs_centralized	shields/momentum_shield	0.05
IndivQLearningParticleDNNOnlyOneHotMoreSeeds/152_3_32	slugs_centralized	shields/momentum_shield	True	-10	False	ParticleMomentum	False	False	10	-30	Individual_Deep_Q	1.0	simple_mlp	True	0.05	2500000	42	True	IndivQLearningParticleDNNOnlyOneHotMoreSeeds/152_3_32_slugs_decentralized	slugs_decentralized	shields/momentum_shield	0.05
IndivQLearningParticleDNNOnlyOneHotMoreSeeds/152_3_32	slugs_centralized	shields/momentum_shield	True	-10	False	ParticleMomentum	False	False	10	-30	Individual_Deep_Q	1.0	simple_mlp	True	0.05	2500000	42	True	IndivQLearningParticleDNNOnlyOneHotMoreSeeds/152_3_32_none	none		0.05
IndivQLearningParticleDNNOnlyOneHotMoreSeeds/153_3_33	slugs_centralized	shields/momentum_shield	True	-10	False	ParticleMomentum	False	False	10	-30	Individual_Deep_Q	1.0	simple_mlp	True	0.05	2500000	43	True	IndivQLearningParticleDNNOnlyOneHotMoreSeeds/153_3_33_slugs_centralized	slugs_centralized	shields/momentum_shield	0.05
IndivQLearningParticleDNNOnlyOneHotMoreSeeds/153_3_33	slugs_centralized	shields/momentum_shield	True	-10	False	ParticleMomentum	False	False	10	-30	Individual_Deep_Q	1.0	simple_mlp	True	0.05	2500000	43	True	IndivQLearningParticleDNNOnlyOneHotMoreSeeds/153_3_33_slugs_decentralized	slugs_decentralized	shields/momentum_shield	0.05
IndivQLearningParticleDNNOnlyOneHotMoreSeeds/153_3_33	slugs_centralized	shields/momentum_shield	True	-10	False	ParticleMomentum	False	False	10	-30	Individual_Deep_Q	1.0	simple_mlp	True	0.05	2500000	43	True	IndivQLearningParticleDNNOnlyOneHotMoreSeeds/153_3_33_none	none		0.05
IndivQLearningParticleDNNOnlyOneHotMoreSeeds/154_3_34	slugs_centralized	shields/momentum_shield	True	-10	False	ParticleMomentum	False	False	10	-30	Individual_Deep_Q	1.0	simple_mlp	True	0.05	2500000	44	True	IndivQLearningParticleDNNOnlyOneHotMoreSeeds/154_3_34_slugs_centralized	slugs_centralized	shields/momentum_shield	0.05
IndivQLearningParticleDNNOnlyOneHotMoreSeeds/154_3_34	slugs_centralized	shields/momentum_shield	True	-10	False	ParticleMomentum	False	False	10	-30	Individual_Deep_Q	1.0	simple_mlp	True	0.05	2500000	44	True	IndivQLearningParticleDNNOnlyOneHotMoreSeeds/154_3_34_slugs_decentralized	slugs_decentralized	shields/momentum_shield	0.05
IndivQLearningParticleDNNOnlyOneHotMoreSeeds/154_3_34	slugs_centralized	shields/momentum_shield	True	-10	False	ParticleMomentum	False	False	10	-30	Individual_Deep_Q	1.0	simple_mlp	True	0.05	2500000	44	True	IndivQLearningParticleDNNOnlyOneHotMoreSeeds/154_3_34_none	none		0.05
IndivQLearningParticleDNNOnlyOneHotMoreSeeds/155_3_35	slugs_centralized	shields/momentum_shield	True	-10	False	ParticleMomentum	False	False	10	-30	Individual_Deep_Q	1.0	simple_mlp	True	0.05	2500000	45	True	IndivQLearningParticleDNNOnlyOneHotMoreSeeds/155_3_35_slugs_centralized	slugs_centralized	shields/momentum_shield	0.05
IndivQLearningParticleDNNOnlyOneHotMoreSeeds/155_3_35	slugs_centralized	shields/momentum_shield	True	-10	False	ParticleMomentum	False	False	10	-30	Individual_Deep_Q	1.0	simple_mlp	True	0.05	2500000	45	True	IndivQLearningParticleDNNOnlyOneHotMoreSeeds/155_3_35_slugs_decentralized	slugs_decentralized	shields/momentum_shield	0.05
IndivQLearningParticleDNNOnlyOneHotMoreSeeds/155_3_35	slugs_centralized	shields/momentum_shield	True	-10	False	ParticleMomentum	False	False	10	-30	Individual_Deep_Q	1.0	simple_mlp	True	0.05	2500000	45	True	IndivQLearningParticleDNNOnlyOneHotMoreSeeds/155_3_35_none	none		0.05
IndivQLearningParticleDNNOnlyOneHotMoreSeeds/156_3_36	slugs_centralized	shields/momentum_shield	True	-10	False	ParticleMomentum	False	False	10	-30	Individual_Deep_Q	1.0	simple_mlp	True	0.05	2500000	46	True	IndivQLearningParticleDNNOnlyOneHotMoreSeeds/156_3_36_slugs_centralized	slugs_centralized	shields/momentum_shield	0.05
IndivQLearningParticleDNNOnlyOneHotMoreSeeds/156_3_36	slugs_centralized	shields/momentum_shield	True	-10	False	ParticleMomentum	False	False	10	-30	Individual_Deep_Q	1.0	simple_mlp	True	0.05	2500000	46	True	IndivQLearningParticleDNNOnlyOneHotMoreSeeds/156_3_36_slugs_decentralized	slugs_decentralized	shields/momentum_shield	0.05
IndivQLearningParticleDNNOnlyOneHotMoreSeeds/156_3_36	slugs_centralized	shields/momentum_shield	True	-10	False	ParticleMomentum	False	False	10	-30	Individual_Deep_Q	1.0	simple_mlp	True	0.05	2500000	46	True	IndivQLearningParticleDNNOnlyOneHotMoreSeeds/156_3_36_none	none		0.05
IndivQLearningParticleDNNOnlyOneHotMoreSeeds/157_3_37	slugs_centralized	shields/momentum_shield	True	-10	False	ParticleMomentum	False	False	10	-30	Individual_Deep_Q	1.0	simple_mlp	True	0.05	2500000	47	True	IndivQLearningParticleDNNOnlyOneHotMoreSeeds/157_3_37_slugs_centralized	slugs_centralized	shields/momentum_shield	0.05
IndivQLearningParticleDNNOnlyOneHotMoreSeeds/157_3_37	slugs_centralized	shields/momentum_shield	True	-10	False	ParticleMomentum	False	False	10	-30	Individual_Deep_Q	1.0	simple_mlp	True	0.05	2500000	47	True	IndivQLearningParticleDNNOnlyOneHotMoreSeeds/157_3_37_slugs_decentralized	slugs_decentralized	shields/momentum_shield	0.05
IndivQLearningParticleDNNOnlyOneHotMoreSeeds/157_3_37	slugs_centralized	shields/momentum_shield	True	-10	False	ParticleMomentum	False	False	10	-30	Individual_Deep_Q	1.0	simple_mlp	True	0.05	2500000	47	True	IndivQLearningParticleDNNOnlyOneHotMoreSeeds/157_3_37_none	none		0.05
IndivQLearningParticleDNNOnlyOneHotMoreSeeds/158_3_38	slugs_centralized	shields/momentum_shield	True	-10	False	ParticleMomentum	False	False	10	-30	Individual_Deep_Q	1.0	simple_mlp	True	0.05	2500000	48	True	IndivQLearningParticleDNNOnlyOneHotMoreSeeds/158_3_38_slugs_centralized	slugs_centralized	shields/momentum_shield	0.05
IndivQLearningParticleDNNOnlyOneHotMoreSeeds/158_3_38	slugs_centralized	shields/momentum_shield	True	-10	False	ParticleMomentum	False	False	10	-30	Individual_Deep_Q	1.0	simple_mlp	True	0.05	2500000	48	True	IndivQLearningParticleDNNOnlyOneHotMoreSeeds/158_3_38_slugs_decentralized	slugs_decentralized	shields/momentum_shield	0.05
IndivQLearningParticleDNNOnlyOneHotMoreSeeds/158_3_38	slugs_centralized	shields/momentum_shield	True	-10	False	ParticleMomentum	False	False	10	-30	Individual_Deep_Q	1.0	simple_mlp	True	0.05	2500000	48	True	IndivQLearningParticleDNNOnlyOneHotMoreSeeds/158_3_38_none	none		0.05
IndivQLearningParticleDNNOnlyOneHotMoreSeeds/159_3_39	slugs_centralized	shields/momentum_shield	True	-10	False	ParticleMomentum	False	False	10	-30	Individual_Deep_Q	1.0	simple_mlp	True	0.05	2500000	49	True	IndivQLearningParticleDNNOnlyOneHotMoreSeeds/159_3_39_slugs_centralized	slugs_centralized	shields/momentum_shield	0.05
IndivQLearningParticleDNNOnlyOneHotMoreSeeds/159_3_39	slugs_centralized	shields/momentum_shield	True	-10	False	ParticleMomentum	False	False	10	-30	Individual_Deep_Q	1.0	simple_mlp	True	0.05	2500000	49	True	IndivQLearningParticleDNNOnlyOneHotMoreSeeds/159_3_39_slugs_decentralized	slugs_decentralized	shields/momentum_shield	0.05
IndivQLearningParticleDNNOnlyOneHotMoreSeeds/159_3_39	slugs_centralized	shields/momentum_shield	True	-10	False	ParticleMomentum	False	False	10	-30	Individual_Deep_Q	1.0	simple_mlp	True	0.05	2500000	49	True	IndivQLearningParticleDNNOnlyOneHotMoreSeeds/159_3_39_none	none		0.05
IndivQLearningParticleDNNOnlyOneHotMoreSeeds/160_4_0	slugs_decentralized	shields/momentum_shield	True	-10	False	ParticleMomentum	False	False	10	-30	Individual_Deep_Q	1.0	simple_mlp	True	0.05	2500000	10	True	IndivQLearningParticleDNNOnlyOneHotMoreSeeds/160_4_0_slugs_centralized	slugs_centralized	shields/momentum_shield	0.05
IndivQLearningParticleDNNOnlyOneHotMoreSeeds/160_4_0	slugs_decentralized	shields/momentum_shield	True	-10	False	ParticleMomentum	False	False	10	-30	Individual_Deep_Q	1.0	simple_mlp	True	0.05	2500000	10	True	IndivQLearningParticleDNNOnlyOneHotMoreSeeds/160_4_0_slugs_decentralized	slugs_decentralized	shields/momentum_shield	0.05
IndivQLearningParticleDNNOnlyOneHotMoreSeeds/160_4_0	slugs_decentralized	shields/momentum_shield	True	-10	False	ParticleMomentum	False	False	10	-30	Individual_Deep_Q	1.0	simple_mlp	True	0.05	2500000	10	True	IndivQLearningParticleDNNOnlyOneHotMoreSeeds/160_4_0_none	none		0.05
IndivQLearningParticleDNNOnlyOneHotMoreSeeds/161_4_1	slugs_decentralized	shields/momentum_shield	True	-10	False	ParticleMomentum	False	False	10	-30	Individual_Deep_Q	1.0	simple_mlp	True	0.05	2500000	11	True	IndivQLearningParticleDNNOnlyOneHotMoreSeeds/161_4_1_slugs_centralized	slugs_centralized	shields/momentum_shield	0.05
IndivQLearningParticleDNNOnlyOneHotMoreSeeds/161_4_1	slugs_decentralized	shields/momentum_shield	True	-10	False	ParticleMomentum	False	False	10	-30	Individual_Deep_Q	1.0	simple_mlp	True	0.05	2500000	11	True	IndivQLearningParticleDNNOnlyOneHotMoreSeeds/161_4_1_slugs_decentralized	slugs_decentralized	shields/momentum_shield	0.05
IndivQLearningParticleDNNOnlyOneHotMoreSeeds/161_4_1	slugs_decentralized	shields/momentum_shield	True	-10	False	ParticleMomentum	False	False	10	-30	Individual_Deep_Q	1.0	simple_mlp	True	0.05	2500000	11	True	IndivQLearningParticleDNNOnlyOneHotMoreSeeds/161_4_1_none	none		0.05
IndivQLearningParticleDNNOnlyOneHotMoreSeeds/162_4_2	slugs_decentralized	shields/momentum_shield	True	-10	False	ParticleMomentum	False	False	10	-30	Individual_Deep_Q	1.0	simple_mlp	True	0.05	2500000	12	True	IndivQLearningParticleDNNOnlyOneHotMoreSeeds/162_4_2_slugs_centralized	slugs_centralized	shields/momentum_shield	0.05
IndivQLearningParticleDNNOnlyOneHotMoreSeeds/162_4_2	slugs_decentralized	shields/momentum_shield	True	-10	False	ParticleMomentum	False	False	10	-30	Individual_Deep_Q	1.0	simple_mlp	True	0.05	2500000	12	True	IndivQLearningParticleDNNOnlyOneHotMoreSeeds/162_4_2_slugs_decentralized	slugs_decentralized	shields/momentum_shield	0.05
IndivQLearningParticleDNNOnlyOneHotMoreSeeds/162_4_2	slugs_decentralized	shields/momentum_shield	True	-10	False	ParticleMomentum	False	False	10	-30	Individual_Deep_Q	1.0	simple_mlp	True	0.05	2500000	12	True	IndivQLearningParticleDNNOnlyOneHotMoreSeeds/162_4_2_none	none		0.05
IndivQLearningParticleDNNOnlyOneHotMoreSeeds/163_4_3	slugs_decentralized	shields/momentum_shield	True	-10	False	ParticleMomentum	False	False	10	-30	Individual_Deep_Q	1.0	simple_mlp	True	0.05	2500000	13	True	IndivQLearningParticleDNNOnlyOneHotMoreSeeds/163_4_3_slugs_centralized	slugs_centralized	shields/momentum_shield	0.05
IndivQLearningParticleDNNOnlyOneHotMoreSeeds/163_4_3	slugs_decentralized	shields/momentum_shield	True	-10	False	ParticleMomentum	False	False	10	-30	Individual_Deep_Q	1.0	simple_mlp	True	0.05	2500000	13	True	IndivQLearningParticleDNNOnlyOneHotMoreSeeds/163_4_3_slugs_decentralized	slugs_decentralized	shields/momentum_shield	0.05
IndivQLearningParticleDNNOnlyOneHotMoreSeeds/163_4_3	slugs_decentralized	shields/momentum_shield	True	-10	False	ParticleMomentum	False	False	10	-30	Individual_Deep_Q	1.0	simple_mlp	True	0.05	2500000	13	True	IndivQLearningParticleDNNOnlyOneHotMoreSeeds/163_4_3_none	none		0.05
IndivQLearningParticleDNNOnlyOneHotMoreSeeds/164_4_4	slugs_decentralized	shields/momentum_shield	True	-10	False	ParticleMomentum	False	False	10	-30	Individual_Deep_Q	1.0	simple_mlp	True	0.05	2500000	14	True	IndivQLearningParticleDNNOnlyOneHotMoreSeeds/164_4_4_slugs_centralized	slugs_centralized	shields/momentum_shield	0.05
IndivQLearningParticleDNNOnlyOneHotMoreSeeds/164_4_4	slugs_decentralized	shields/momentum_shield	True	-10	False	ParticleMomentum	False	False	10	-30	Individual_Deep_Q	1.0	simple_mlp	True	0.05	2500000	14	True	IndivQLearningParticleDNNOnlyOneHotMoreSeeds/164_4_4_slugs_decentralized	slugs_decentralized	shields/momentum_shield	0.05
IndivQLearningParticleDNNOnlyOneHotMoreSeeds/164_4_4	slugs_decentralized	shields/momentum_shield	True	-10	False	ParticleMomentum	False	False	10	-30	Individual_Deep_Q	1.0	simple_mlp	True	0.05	2500000	14	True	IndivQLearningParticleDNNOnlyOneHotMoreSeeds/164_4_4_none	none		0.05
IndivQLearningParticleDNNOnlyOneHotMoreSeeds/165_4_5	slugs_decentralized	shields/momentum_shield	True	-10	False	ParticleMomentum	False	False	10	-30	Individual_Deep_Q	1.0	simple_mlp	True	0.05	2500000	15	True	IndivQLearningParticleDNNOnlyOneHotMoreSeeds/165_4_5_slugs_centralized	slugs_centralized	shields/momentum_shield	0.05
IndivQLearningParticleDNNOnlyOneHotMoreSeeds/165_4_5	slugs_decentralized	shields/momentum_shield	True	-10	False	ParticleMomentum	False	False	10	-30	Individual_Deep_Q	1.0	simple_mlp	True	0.05	2500000	15	True	IndivQLearningParticleDNNOnlyOneHotMoreSeeds/165_4_5_slugs_decentralized	slugs_decentralized	shields/momentum_shield	0.05
IndivQLearningParticleDNNOnlyOneHotMoreSeeds/165_4_5	slugs_decentralized	shields/momentum_shield	True	-10	False	ParticleMomentum	False	False	10	-30	Individual_Deep_Q	1.0	simple_mlp	True	0.05	2500000	15	True	IndivQLearningParticleDNNOnlyOneHotMoreSeeds/165_4_5_none	none		0.05
IndivQLearningParticleDNNOnlyOneHotMoreSeeds/166_4_6	slugs_decentralized	shields/momentum_shield	True	-10	False	ParticleMomentum	False	False	10	-30	Individual_Deep_Q	1.0	simple_mlp	True	0.05	2500000	16	True	IndivQLearningParticleDNNOnlyOneHotMoreSeeds/166_4_6_slugs_centralized	slugs_centralized	shields/momentum_shield	0.05
IndivQLearningParticleDNNOnlyOneHotMoreSeeds/166_4_6	slugs_decentralized	shields/momentum_shield	True	-10	False	ParticleMomentum	False	False	10	-30	Individual_Deep_Q	1.0	simple_mlp	True	0.05	2500000	16	True	IndivQLearningParticleDNNOnlyOneHotMoreSeeds/166_4_6_slugs_decentralized	slugs_decentralized	shields/momentum_shield	0.05
IndivQLearningParticleDNNOnlyOneHotMoreSeeds/166_4_6	slugs_decentralized	shields/momentum_shield	True	-10	False	ParticleMomentum	False	False	10	-30	Individual_Deep_Q	1.0	simple_mlp	True	0.05	2500000	16	True	IndivQLearningParticleDNNOnlyOneHotMoreSeeds/166_4_6_none	none		0.05
IndivQLearningParticleDNNOnlyOneHotMoreSeeds/167_4_7	slugs_decentralized	shields/momentum_shield	True	-10	False	ParticleMomentum	False	False	10	-30	Individual_Deep_Q	1.0	simple_mlp	True	0.05	2500000	17	True	IndivQLearningParticleDNNOnlyOneHotMoreSeeds/167_4_7_slugs_centralized	slugs_centralized	shields/momentum_shield	0.05
IndivQLearningParticleDNNOnlyOneHotMoreSeeds/167_4_7	slugs_decentralized	shields/momentum_shield	True	-10	False	ParticleMomentum	False	False	10	-30	Individual_Deep_Q	1.0	simple_mlp	True	0.05	2500000	17	True	IndivQLearningParticleDNNOnlyOneHotMoreSeeds/167_4_7_slugs_decentralized	slugs_decentralized	shields/momentum_shield	0.05
IndivQLearningParticleDNNOnlyOneHotMoreSeeds/167_4_7	slugs_decentralized	shields/momentum_shield	True	-10	False	ParticleMomentum	False	False	10	-30	Individual_Deep_Q	1.0	simple_mlp	True	0.05	2500000	17	True	IndivQLearningParticleDNNOnlyOneHotMoreSeeds/167_4_7_none	none		0.05
IndivQLearningParticleDNNOnlyOneHotMoreSeeds/168_4_8	slugs_decentralized	shields/momentum_shield	True	-10	False	ParticleMomentum	False	False	10	-30	Individual_Deep_Q	1.0	simple_mlp	True	0.05	2500000	18	True	IndivQLearningParticleDNNOnlyOneHotMoreSeeds/168_4_8_slugs_centralized	slugs_centralized	shields/momentum_shield	0.05
IndivQLearningParticleDNNOnlyOneHotMoreSeeds/168_4_8	slugs_decentralized	shields/momentum_shield	True	-10	False	ParticleMomentum	False	False	10	-30	Individual_Deep_Q	1.0	simple_mlp	True	0.05	2500000	18	True	IndivQLearningParticleDNNOnlyOneHotMoreSeeds/168_4_8_slugs_decentralized	slugs_decentralized	shields/momentum_shield	0.05
IndivQLearningParticleDNNOnlyOneHotMoreSeeds/168_4_8	slugs_decentralized	shields/momentum_shield	True	-10	False	ParticleMomentum	False	False	10	-30	Individual_Deep_Q	1.0	simple_mlp	True	0.05	2500000	18	True	IndivQLearningParticleDNNOnlyOneHotMoreSeeds/168_4_8_none	none		0.05
IndivQLearningParticleDNNOnlyOneHotMoreSeeds/169_4_9	slugs_decentralized	shields/momentum_shield	True	-10	False	ParticleMomentum	False	False	10	-30	Individual_Deep_Q	1.0	simple_mlp	True	0.05	2500000	19	True	IndivQLearningParticleDNNOnlyOneHotMoreSeeds/169_4_9_slugs_centralized	slugs_centralized	shields/momentum_shield	0.05
IndivQLearningParticleDNNOnlyOneHotMoreSeeds/169_4_9	slugs_decentralized	shields/momentum_shield	True	-10	False	ParticleMomentum	False	False	10	-30	Individual_Deep_Q	1.0	simple_mlp	True	0.05	2500000	19	True	IndivQLearningParticleDNNOnlyOneHotMoreSeeds/169_4_9_slugs_decentralized	slugs_decentralized	shields/momentum_shield	0.05
IndivQLearningParticleDNNOnlyOneHotMoreSeeds/169_4_9	slugs_decentralized	shields/momentum_shield	True	-10	False	ParticleMomentum	False	False	10	-30	Individual_Deep_Q	1.0	simple_mlp	True	0.05	2500000	19	True	IndivQLearningParticleDNNOnlyOneHotMoreSeeds/169_4_9_none	none		0.05
IndivQLearningParticleDNNOnlyOneHotMoreSeeds/170_4_10	slugs_decentralized	shields/momentum_shield	True	-10	False	ParticleMomentum	False	False	10	-30	Individual_Deep_Q	1.0	simple_mlp	True	0.05	2500000	20	True	IndivQLearningParticleDNNOnlyOneHotMoreSeeds/170_4_10_slugs_centralized	slugs_centralized	shields/momentum_shield	0.05
IndivQLearningParticleDNNOnlyOneHotMoreSeeds/170_4_10	slugs_decentralized	shields/momentum_shield	True	-10	False	ParticleMomentum	False	False	10	-30	Individual_Deep_Q	1.0	simple_mlp	True	0.05	2500000	20	True	IndivQLearningParticleDNNOnlyOneHotMoreSeeds/170_4_10_slugs_decentralized	slugs_decentralized	shields/momentum_shield	0.05
IndivQLearningParticleDNNOnlyOneHotMoreSeeds/170_4_10	slugs_decentralized	shields/momentum_shield	True	-10	False	ParticleMomentum	False	False	10	-30	Individual_Deep_Q	1.0	simple_mlp	True	0.05	2500000	20	True	IndivQLearningParticleDNNOnlyOneHotMoreSeeds/170_4_10_none	none		0.05
IndivQLearningParticleDNNOnlyOneHotMoreSeeds/171_4_11	slugs_decentralized	shields/momentum_shield	True	-10	False	ParticleMomentum	False	False	10	-30	Individual_Deep_Q	1.0	simple_mlp	True	0.05	2500000	21	True	IndivQLearningParticleDNNOnlyOneHotMoreSeeds/171_4_11_slugs_centralized	slugs_centralized	shields/momentum_shield	0.05
IndivQLearningParticleDNNOnlyOneHotMoreSeeds/171_4_11	slugs_decentralized	shields/momentum_shield	True	-10	False	ParticleMomentum	False	False	10	-30	Individual_Deep_Q	1.0	simple_mlp	True	0.05	2500000	21	True	IndivQLearningParticleDNNOnlyOneHotMoreSeeds/171_4_11_slugs_decentralized	slugs_decentralized	shields/momentum_shield	0.05
IndivQLearningParticleDNNOnlyOneHotMoreSeeds/171_4_11	slugs_decentralized	shields/momentum_shield	True	-10	False	ParticleMomentum	False	False	10	-30	Individual_Deep_Q	1.0	simple_mlp	True	0.05	2500000	21	True	IndivQLearningParticleDNNOnlyOneHotMoreSeeds/171_4_11_none	none		0.05
IndivQLearningParticleDNNOnlyOneHotMoreSeeds/172_4_12	slugs_decentralized	shields/momentum_shield	True	-10	False	ParticleMomentum	False	False	10	-30	Individual_Deep_Q	1.0	simple_mlp	True	0.05	2500000	22	True	IndivQLearningParticleDNNOnlyOneHotMoreSeeds/172_4_12_slugs_centralized	slugs_centralized	shields/momentum_shield	0.05
IndivQLearningParticleDNNOnlyOneHotMoreSeeds/172_4_12	slugs_decentralized	shields/momentum_shield	True	-10	False	ParticleMomentum	False	False	10	-30	Individual_Deep_Q	1.0	simple_mlp	True	0.05	2500000	22	True	IndivQLearningParticleDNNOnlyOneHotMoreSeeds/172_4_12_slugs_decentralized	slugs_decentralized	shields/momentum_shield	0.05
IndivQLearningParticleDNNOnlyOneHotMoreSeeds/172_4_12	slugs_decentralized	shields/momentum_shield	True	-10	False	ParticleMomentum	False	False	10	-30	Individual_Deep_Q	1.0	simple_mlp	True	0.05	2500000	22	True	IndivQLearningParticleDNNOnlyOneHotMoreSeeds/172_4_12_none	none		0.05
IndivQLearningParticleDNNOnlyOneHotMoreSeeds/173_4_13	slugs_decentralized	shields/momentum_shield	True	-10	False	ParticleMomentum	False	False	10	-30	Individual_Deep_Q	1.0	simple_mlp	True	0.05	2500000	23	True	IndivQLearningParticleDNNOnlyOneHotMoreSeeds/173_4_13_slugs_centralized	slugs_centralized	shields/momentum_shield	0.05
IndivQLearningParticleDNNOnlyOneHotMoreSeeds/173_4_13	slugs_decentralized	shields/momentum_shield	True	-10	False	ParticleMomentum	False	False	10	-30	Individual_Deep_Q	1.0	simple_mlp	True	0.05	2500000	23	True	IndivQLearningParticleDNNOnlyOneHotMoreSeeds/173_4_13_slugs_decentralized	slugs_decentralized	shields/momentum_shield	0.05
IndivQLearningParticleDNNOnlyOneHotMoreSeeds/173_4_13	slugs_decentralized	shields/momentum_shield	True	-10	False	ParticleMomentum	False	False	10	-30	Individual_Deep_Q	1.0	simple_mlp	True	0.05	2500000	23	True	IndivQLearningParticleDNNOnlyOneHotMoreSeeds/173_4_13_none	none		0.05
IndivQLearningParticleDNNOnlyOneHotMoreSeeds/174_4_14	slugs_decentralized	shields/momentum_shield	True	-10	False	ParticleMomentum	False	False	10	-30	Individual_Deep_Q	1.0	simple_mlp	True	0.05	2500000	24	True	IndivQLearningParticleDNNOnlyOneHotMoreSeeds/174_4_14_slugs_centralized	slugs_centralized	shields/momentum_shield	0.05
IndivQLearningParticleDNNOnlyOneHotMoreSeeds/174_4_14	slugs_decentralized	shields/momentum_shield	True	-10	False	ParticleMomentum	False	False	10	-30	Individual_Deep_Q	1.0	simple_mlp	True	0.05	2500000	24	True	IndivQLearningParticleDNNOnlyOneHotMoreSeeds/174_4_14_slugs_decentralized	slugs_decentralized	shields/momentum_shield	0.05
IndivQLearningParticleDNNOnlyOneHotMoreSeeds/174_4_14	slugs_decentralized	shields/momentum_shield	True	-10	False	ParticleMomentum	False	False	10	-30	Individual_Deep_Q	1.0	simple_mlp	True	0.05	2500000	24	True	IndivQLearningParticleDNNOnlyOneHotMoreSeeds/174_4_14_none	none		0.05
IndivQLearningParticleDNNOnlyOneHotMoreSeeds/175_4_15	slugs_decentralized	shields/momentum_shield	True	-10	False	ParticleMomentum	False	False	10	-30	Individual_Deep_Q	1.0	simple_mlp	True	0.05	2500000	25	True	IndivQLearningParticleDNNOnlyOneHotMoreSeeds/175_4_15_slugs_centralized	slugs_centralized	shields/momentum_shield	0.05
IndivQLearningParticleDNNOnlyOneHotMoreSeeds/175_4_15	slugs_decentralized	shields/momentum_shield	True	-10	False	ParticleMomentum	False	False	10	-30	Individual_Deep_Q	1.0	simple_mlp	True	0.05	2500000	25	True	IndivQLearningParticleDNNOnlyOneHotMoreSeeds/175_4_15_slugs_decentralized	slugs_decentralized	shields/momentum_shield	0.05
IndivQLearningParticleDNNOnlyOneHotMoreSeeds/175_4_15	slugs_decentralized	shields/momentum_shield	True	-10	False	ParticleMomentum	False	False	10	-30	Individual_Deep_Q	1.0	simple_mlp	True	0.05	2500000	25	True	IndivQLearningParticleDNNOnlyOneHotMoreSeeds/175_4_15_none	none		0.05
IndivQLearningParticleDNNOnlyOneHotMoreSeeds/176_4_16	slugs_decentralized	shields/momentum_shield	True	-10	False	ParticleMomentum	False	False	10	-30	Individual_Deep_Q	1.0	simple_mlp	True	0.05	2500000	26	True	IndivQLearningParticleDNNOnlyOneHotMoreSeeds/176_4_16_slugs_centralized	slugs_centralized	shields/momentum_shield	0.05
IndivQLearningParticleDNNOnlyOneHotMoreSeeds/176_4_16	slugs_decentralized	shields/momentum_shield	True	-10	False	ParticleMomentum	False	False	10	-30	Individual_Deep_Q	1.0	simple_mlp	True	0.05	2500000	26	True	IndivQLearningParticleDNNOnlyOneHotMoreSeeds/176_4_16_slugs_decentralized	slugs_decentralized	shields/momentum_shield	0.05
IndivQLearningParticleDNNOnlyOneHotMoreSeeds/176_4_16	slugs_decentralized	shields/momentum_shield	True	-10	False	ParticleMomentum	False	False	10	-30	Individual_Deep_Q	1.0	simple_mlp	True	0.05	2500000	26	True	IndivQLearningParticleDNNOnlyOneHotMoreSeeds/176_4_16_none	none		0.05
IndivQLearningParticleDNNOnlyOneHotMoreSeeds/177_4_17	slugs_decentralized	shields/momentum_shield	True	-10	False	ParticleMomentum	False	False	10	-30	Individual_Deep_Q	1.0	simple_mlp	True	0.05	2500000	27	True	IndivQLearningParticleDNNOnlyOneHotMoreSeeds/177_4_17_slugs_centralized	slugs_centralized	shields/momentum_shield	0.05
IndivQLearningParticleDNNOnlyOneHotMoreSeeds/177_4_17	slugs_decentralized	shields/momentum_shield	True	-10	False	ParticleMomentum	False	False	10	-30	Individual_Deep_Q	1.0	simple_mlp	True	0.05	2500000	27	True	IndivQLearningParticleDNNOnlyOneHotMoreSeeds/177_4_17_slugs_decentralized	slugs_decentralized	shields/momentum_shield	0.05
IndivQLearningParticleDNNOnlyOneHotMoreSeeds/177_4_17	slugs_decentralized	shields/momentum_shield	True	-10	False	ParticleMomentum	False	False	10	-30	Individual_Deep_Q	1.0	simple_mlp	True	0.05	2500000	27	True	IndivQLearningParticleDNNOnlyOneHotMoreSeeds/177_4_17_none	none		0.05
IndivQLearningParticleDNNOnlyOneHotMoreSeeds/178_4_18	slugs_decentralized	shields/momentum_shield	True	-10	False	ParticleMomentum	False	False	10	-30	Individual_Deep_Q	1.0	simple_mlp	True	0.05	2500000	28	True	IndivQLearningParticleDNNOnlyOneHotMoreSeeds/178_4_18_slugs_centralized	slugs_centralized	shields/momentum_shield	0.05
IndivQLearningParticleDNNOnlyOneHotMoreSeeds/178_4_18	slugs_decentralized	shields/momentum_shield	True	-10	False	ParticleMomentum	False	False	10	-30	Individual_Deep_Q	1.0	simple_mlp	True	0.05	2500000	28	True	IndivQLearningParticleDNNOnlyOneHotMoreSeeds/178_4_18_slugs_decentralized	slugs_decentralized	shields/momentum_shield	0.05
IndivQLearningParticleDNNOnlyOneHotMoreSeeds/178_4_18	slugs_decentralized	shields/momentum_shield	True	-10	False	ParticleMomentum	False	False	10	-30	Individual_Deep_Q	1.0	simple_mlp	True	0.05	2500000	28	True	IndivQLearningParticleDNNOnlyOneHotMoreSeeds/178_4_18_none	none		0.05
IndivQLearningParticleDNNOnlyOneHotMoreSeeds/179_4_19	slugs_decentralized	shields/momentum_shield	True	-10	False	ParticleMomentum	False	False	10	-30	Individual_Deep_Q	1.0	simple_mlp	True	0.05	2500000	29	True	IndivQLearningParticleDNNOnlyOneHotMoreSeeds/179_4_19_slugs_centralized	slugs_centralized	shields/momentum_shield	0.05
IndivQLearningParticleDNNOnlyOneHotMoreSeeds/179_4_19	slugs_decentralized	shields/momentum_shield	True	-10	False	ParticleMomentum	False	False	10	-30	Individual_Deep_Q	1.0	simple_mlp	True	0.05	2500000	29	True	IndivQLearningParticleDNNOnlyOneHotMoreSeeds/179_4_19_slugs_decentralized	slugs_decentralized	shields/momentum_shield	0.05
IndivQLearningParticleDNNOnlyOneHotMoreSeeds/179_4_19	slugs_decentralized	shields/momentum_shield	True	-10	False	ParticleMomentum	False	False	10	-30	Individual_Deep_Q	1.0	simple_mlp	True	0.05	2500000	29	True	IndivQLearningParticleDNNOnlyOneHotMoreSeeds/179_4_19_none	none		0.05
IndivQLearningParticleDNNOnlyOneHotMoreSeeds/180_4_20	slugs_decentralized	shields/momentum_shield	True	-10	False	ParticleMomentum	False	False	10	-30	Individual_Deep_Q	1.0	simple_mlp	True	0.05	2500000	30	True	IndivQLearningParticleDNNOnlyOneHotMoreSeeds/180_4_20_slugs_centralized	slugs_centralized	shields/momentum_shield	0.05
IndivQLearningParticleDNNOnlyOneHotMoreSeeds/180_4_20	slugs_decentralized	shields/momentum_shield	True	-10	False	ParticleMomentum	False	False	10	-30	Individual_Deep_Q	1.0	simple_mlp	True	0.05	2500000	30	True	IndivQLearningParticleDNNOnlyOneHotMoreSeeds/180_4_20_slugs_decentralized	slugs_decentralized	shields/momentum_shield	0.05
IndivQLearningParticleDNNOnlyOneHotMoreSeeds/180_4_20	slugs_decentralized	shields/momentum_shield	True	-10	False	ParticleMomentum	False	False	10	-30	Individual_Deep_Q	1.0	simple_mlp	True	0.05	2500000	30	True	IndivQLearningParticleDNNOnlyOneHotMoreSeeds/180_4_20_none	none		0.05
IndivQLearningParticleDNNOnlyOneHotMoreSeeds/181_4_21	slugs_decentralized	shields/momentum_shield	True	-10	False	ParticleMomentum	False	False	10	-30	Individual_Deep_Q	1.0	simple_mlp	True	0.05	2500000	31	True	IndivQLearningParticleDNNOnlyOneHotMoreSeeds/181_4_21_slugs_centralized	slugs_centralized	shields/momentum_shield	0.05
IndivQLearningParticleDNNOnlyOneHotMoreSeeds/181_4_21	slugs_decentralized	shields/momentum_shield	True	-10	False	ParticleMomentum	False	False	10	-30	Individual_Deep_Q	1.0	simple_mlp	True	0.05	2500000	31	True	IndivQLearningParticleDNNOnlyOneHotMoreSeeds/181_4_21_slugs_decentralized	slugs_decentralized	shields/momentum_shield	0.05
IndivQLearningParticleDNNOnlyOneHotMoreSeeds/181_4_21	slugs_decentralized	shields/momentum_shield	True	-10	False	ParticleMomentum	False	False	10	-30	Individual_Deep_Q	1.0	simple_mlp	True	0.05	2500000	31	True	IndivQLearningParticleDNNOnlyOneHotMoreSeeds/181_4_21_none	none		0.05
IndivQLearningParticleDNNOnlyOneHotMoreSeeds/182_4_22	slugs_decentralized	shields/momentum_shield	True	-10	False	ParticleMomentum	False	False	10	-30	Individual_Deep_Q	1.0	simple_mlp	True	0.05	2500000	32	True	IndivQLearningParticleDNNOnlyOneHotMoreSeeds/182_4_22_slugs_centralized	slugs_centralized	shields/momentum_shield	0.05
IndivQLearningParticleDNNOnlyOneHotMoreSeeds/182_4_22	slugs_decentralized	shields/momentum_shield	True	-10	False	ParticleMomentum	False	False	10	-30	Individual_Deep_Q	1.0	simple_mlp	True	0.05	2500000	32	True	IndivQLearningParticleDNNOnlyOneHotMoreSeeds/182_4_22_slugs_decentralized	slugs_decentralized	shields/momentum_shield	0.05
IndivQLearningParticleDNNOnlyOneHotMoreSeeds/182_4_22	slugs_decentralized	shields/momentum_shield	True	-10	False	ParticleMomentum	False	False	10	-30	Individual_Deep_Q	1.0	simple_mlp	True	0.05	2500000	32	True	IndivQLearningParticleDNNOnlyOneHotMoreSeeds/182_4_22_none	none		0.05
IndivQLearningParticleDNNOnlyOneHotMoreSeeds/183_4_23	slugs_decentralized	shields/momentum_shield	True	-10	False	ParticleMomentum	False	False	10	-30	Individual_Deep_Q	1.0	simple_mlp	True	0.05	2500000	33	True	IndivQLearningParticleDNNOnlyOneHotMoreSeeds/183_4_23_slugs_centralized	slugs_centralized	shields/momentum_shield	0.05
IndivQLearningParticleDNNOnlyOneHotMoreSeeds/183_4_23	slugs_decentralized	shields/momentum_shield	True	-10	False	ParticleMomentum	False	False	10	-30	Individual_Deep_Q	1.0	simple_mlp	True	0.05	2500000	33	True	IndivQLearningParticleDNNOnlyOneHotMoreSeeds/183_4_23_slugs_decentralized	slugs_decentralized	shields/momentum_shield	0.05
IndivQLearningParticleDNNOnlyOneHotMoreSeeds/183_4_23	slugs_decentralized	shields/momentum_shield	True	-10	False	ParticleMomentum	False	False	10	-30	Individual_Deep_Q	1.0	simple_mlp	True	0.05	2500000	33	True	IndivQLearningParticleDNNOnlyOneHotMoreSeeds/183_4_23_none	none		0.05
IndivQLearningParticleDNNOnlyOneHotMoreSeeds/184_4_24	slugs_decentralized	shields/momentum_shield	True	-10	False	ParticleMomentum	False	False	10	-30	Individual_Deep_Q	1.0	simple_mlp	True	0.05	2500000	34	True	IndivQLearningParticleDNNOnlyOneHotMoreSeeds/184_4_24_slugs_centralized	slugs_centralized	shields/momentum_shield	0.05
IndivQLearningParticleDNNOnlyOneHotMoreSeeds/184_4_24	slugs_decentralized	shields/momentum_shield	True	-10	False	ParticleMomentum	False	False	10	-30	Individual_Deep_Q	1.0	simple_mlp	True	0.05	2500000	34	True	IndivQLearningParticleDNNOnlyOneHotMoreSeeds/184_4_24_slugs_decentralized	slugs_decentralized	shields/momentum_shield	0.05
IndivQLearningParticleDNNOnlyOneHotMoreSeeds/184_4_24	slugs_decentralized	shields/momentum_shield	True	-10	False	ParticleMomentum	False	False	10	-30	Individual_Deep_Q	1.0	simple_mlp	True	0.05	2500000	34	True	IndivQLearningParticleDNNOnlyOneHotMoreSeeds/184_4_24_none	none		0.05
IndivQLearningParticleDNNOnlyOneHotMoreSeeds/185_4_25	slugs_decentralized	shields/momentum_shield	True	-10	False	ParticleMomentum	False	False	10	-30	Individual_Deep_Q	1.0	simple_mlp	True	0.05	2500000	35	True	IndivQLearningParticleDNNOnlyOneHotMoreSeeds/185_4_25_slugs_centralized	slugs_centralized	shields/momentum_shield	0.05
IndivQLearningParticleDNNOnlyOneHotMoreSeeds/185_4_25	slugs_decentralized	shields/momentum_shield	True	-10	False	ParticleMomentum	False	False	10	-30	Individual_Deep_Q	1.0	simple_mlp	True	0.05	2500000	35	True	IndivQLearningParticleDNNOnlyOneHotMoreSeeds/185_4_25_slugs_decentralized	slugs_decentralized	shields/momentum_shield	0.05
IndivQLearningParticleDNNOnlyOneHotMoreSeeds/185_4_25	slugs_decentralized	shields/momentum_shield	True	-10	False	ParticleMomentum	False	False	10	-30	Individual_Deep_Q	1.0	simple_mlp	True	0.05	2500000	35	True	IndivQLearningParticleDNNOnlyOneHotMoreSeeds/185_4_25_none	none		0.05
IndivQLearningParticleDNNOnlyOneHotMoreSeeds/186_4_26	slugs_decentralized	shields/momentum_shield	True	-10	False	ParticleMomentum	False	False	10	-30	Individual_Deep_Q	1.0	simple_mlp	True	0.05	2500000	36	True	IndivQLearningParticleDNNOnlyOneHotMoreSeeds/186_4_26_slugs_centralized	slugs_centralized	shields/momentum_shield	0.05
IndivQLearningParticleDNNOnlyOneHotMoreSeeds/186_4_26	slugs_decentralized	shields/momentum_shield	True	-10	False	ParticleMomentum	False	False	10	-30	Individual_Deep_Q	1.0	simple_mlp	True	0.05	2500000	36	True	IndivQLearningParticleDNNOnlyOneHotMoreSeeds/186_4_26_slugs_decentralized	slugs_decentralized	shields/momentum_shield	0.05
IndivQLearningParticleDNNOnlyOneHotMoreSeeds/186_4_26	slugs_decentralized	shields/momentum_shield	True	-10	False	ParticleMomentum	False	False	10	-30	Individual_Deep_Q	1.0	simple_mlp	True	0.05	2500000	36	True	IndivQLearningParticleDNNOnlyOneHotMoreSeeds/186_4_26_none	none		0.05
IndivQLearningParticleDNNOnlyOneHotMoreSeeds/187_4_27	slugs_decentralized	shields/momentum_shield	True	-10	False	ParticleMomentum	False	False	10	-30	Individual_Deep_Q	1.0	simple_mlp	True	0.05	2500000	37	True	IndivQLearningParticleDNNOnlyOneHotMoreSeeds/187_4_27_slugs_centralized	slugs_centralized	shields/momentum_shield	0.05
IndivQLearningParticleDNNOnlyOneHotMoreSeeds/187_4_27	slugs_decentralized	shields/momentum_shield	True	-10	False	ParticleMomentum	False	False	10	-30	Individual_Deep_Q	1.0	simple_mlp	True	0.05	2500000	37	True	IndivQLearningParticleDNNOnlyOneHotMoreSeeds/187_4_27_slugs_decentralized	slugs_decentralized	shields/momentum_shield	0.05
IndivQLearningParticleDNNOnlyOneHotMoreSeeds/187_4_27	slugs_decentralized	shields/momentum_shield	True	-10	False	ParticleMomentum	False	False	10	-30	Individual_Deep_Q	1.0	simple_mlp	True	0.05	2500000	37	True	IndivQLearningParticleDNNOnlyOneHotMoreSeeds/187_4_27_none	none		0.05
IndivQLearningParticleDNNOnlyOneHotMoreSeeds/188_4_28	slugs_decentralized	shields/momentum_shield	True	-10	False	ParticleMomentum	False	False	10	-30	Individual_Deep_Q	1.0	simple_mlp	True	0.05	2500000	38	True	IndivQLearningParticleDNNOnlyOneHotMoreSeeds/188_4_28_slugs_centralized	slugs_centralized	shields/momentum_shield	0.05
IndivQLearningParticleDNNOnlyOneHotMoreSeeds/188_4_28	slugs_decentralized	shields/momentum_shield	True	-10	False	ParticleMomentum	False	False	10	-30	Individual_Deep_Q	1.0	simple_mlp	True	0.05	2500000	38	True	IndivQLearningParticleDNNOnlyOneHotMoreSeeds/188_4_28_slugs_decentralized	slugs_decentralized	shields/momentum_shield	0.05
IndivQLearningParticleDNNOnlyOneHotMoreSeeds/188_4_28	slugs_decentralized	shields/momentum_shield	True	-10	False	ParticleMomentum	False	False	10	-30	Individual_Deep_Q	1.0	simple_mlp	True	0.05	2500000	38	True	IndivQLearningParticleDNNOnlyOneHotMoreSeeds/188_4_28_none	none		0.05
IndivQLearningParticleDNNOnlyOneHotMoreSeeds/189_4_29	slugs_decentralized	shields/momentum_shield	True	-10	False	ParticleMomentum	False	False	10	-30	Individual_Deep_Q	1.0	simple_mlp	True	0.05	2500000	39	True	IndivQLearningParticleDNNOnlyOneHotMoreSeeds/189_4_29_slugs_centralized	slugs_centralized	shields/momentum_shield	0.05
IndivQLearningParticleDNNOnlyOneHotMoreSeeds/189_4_29	slugs_decentralized	shields/momentum_shield	True	-10	False	ParticleMomentum	False	False	10	-30	Individual_Deep_Q	1.0	simple_mlp	True	0.05	2500000	39	True	IndivQLearningParticleDNNOnlyOneHotMoreSeeds/189_4_29_slugs_decentralized	slugs_decentralized	shields/momentum_shield	0.05
IndivQLearningParticleDNNOnlyOneHotMoreSeeds/189_4_29	slugs_decentralized	shields/momentum_shield	True	-10	False	ParticleMomentum	False	False	10	-30	Individual_Deep_Q	1.0	simple_mlp	True	0.05	2500000	39	True	IndivQLearningParticleDNNOnlyOneHotMoreSeeds/189_4_29_none	none		0.05
IndivQLearningParticleDNNOnlyOneHotMoreSeeds/190_4_30	slugs_decentralized	shields/momentum_shield	True	-10	False	ParticleMomentum	False	False	10	-30	Individual_Deep_Q	1.0	simple_mlp	True	0.05	2500000	40	True	IndivQLearningParticleDNNOnlyOneHotMoreSeeds/190_4_30_slugs_centralized	slugs_centralized	shields/momentum_shield	0.05
IndivQLearningParticleDNNOnlyOneHotMoreSeeds/190_4_30	slugs_decentralized	shields/momentum_shield	True	-10	False	ParticleMomentum	False	False	10	-30	Individual_Deep_Q	1.0	simple_mlp	True	0.05	2500000	40	True	IndivQLearningParticleDNNOnlyOneHotMoreSeeds/190_4_30_slugs_decentralized	slugs_decentralized	shields/momentum_shield	0.05
IndivQLearningParticleDNNOnlyOneHotMoreSeeds/190_4_30	slugs_decentralized	shields/momentum_shield	True	-10	False	ParticleMomentum	False	False	10	-30	Individual_Deep_Q	1.0	simple_mlp	True	0.05	2500000	40	True	IndivQLearningParticleDNNOnlyOneHotMoreSeeds/190_4_30_none	none		0.05
IndivQLearningParticleDNNOnlyOneHotMoreSeeds/191_4_31	slugs_decentralized	shields/momentum_shield	True	-10	False	ParticleMomentum	False	False	10	-30	Individual_Deep_Q	1.0	simple_mlp	True	0.05	2500000	41	True	IndivQLearningParticleDNNOnlyOneHotMoreSeeds/191_4_31_slugs_centralized	slugs_centralized	shields/momentum_shield	0.05
IndivQLearningParticleDNNOnlyOneHotMoreSeeds/191_4_31	slugs_decentralized	shields/momentum_shield	True	-10	False	ParticleMomentum	False	False	10	-30	Individual_Deep_Q	1.0	simple_mlp	True	0.05	2500000	41	True	IndivQLearningParticleDNNOnlyOneHotMoreSeeds/191_4_31_slugs_decentralized	slugs_decentralized	shields/momentum_shield	0.05
IndivQLearningParticleDNNOnlyOneHotMoreSeeds/191_4_31	slugs_decentralized	shields/momentum_shield	True	-10	False	ParticleMomentum	False	False	10	-30	Individual_Deep_Q	1.0	simple_mlp	True	0.05	2500000	41	True	IndivQLearningParticleDNNOnlyOneHotMoreSeeds/191_4_31_none	none		0.05
IndivQLearningParticleDNNOnlyOneHotMoreSeeds/192_4_32	slugs_decentralized	shields/momentum_shield	True	-10	False	ParticleMomentum	False	False	10	-30	Individual_Deep_Q	1.0	simple_mlp	True	0.05	2500000	42	True	IndivQLearningParticleDNNOnlyOneHotMoreSeeds/192_4_32_slugs_centralized	slugs_centralized	shields/momentum_shield	0.05
IndivQLearningParticleDNNOnlyOneHotMoreSeeds/192_4_32	slugs_decentralized	shields/momentum_shield	True	-10	False	ParticleMomentum	False	False	10	-30	Individual_Deep_Q	1.0	simple_mlp	True	0.05	2500000	42	True	IndivQLearningParticleDNNOnlyOneHotMoreSeeds/192_4_32_slugs_decentralized	slugs_decentralized	shields/momentum_shield	0.05
IndivQLearningParticleDNNOnlyOneHotMoreSeeds/192_4_32	slugs_decentralized	shields/momentum_shield	True	-10	False	ParticleMomentum	False	False	10	-30	Individual_Deep_Q	1.0	simple_mlp	True	0.05	2500000	42	True	IndivQLearningParticleDNNOnlyOneHotMoreSeeds/192_4_32_none	none		0.05
IndivQLearningParticleDNNOnlyOneHotMoreSeeds/193_4_33	slugs_decentralized	shields/momentum_shield	True	-10	False	ParticleMomentum	False	False	10	-30	Individual_Deep_Q	1.0	simple_mlp	True	0.05	2500000	43	True	IndivQLearningParticleDNNOnlyOneHotMoreSeeds/193_4_33_slugs_centralized	slugs_centralized	shields/momentum_shield	0.05
IndivQLearningParticleDNNOnlyOneHotMoreSeeds/193_4_33	slugs_decentralized	shields/momentum_shield	True	-10	False	ParticleMomentum	False	False	10	-30	Individual_Deep_Q	1.0	simple_mlp	True	0.05	2500000	43	True	IndivQLearningParticleDNNOnlyOneHotMoreSeeds/193_4_33_slugs_decentralized	slugs_decentralized	shields/momentum_shield	0.05
IndivQLearningParticleDNNOnlyOneHotMoreSeeds/193_4_33	slugs_decentralized	shields/momentum_shield	True	-10	False	ParticleMomentum	False	False	10	-30	Individual_Deep_Q	1.0	simple_mlp	True	0.05	2500000	43	True	IndivQLearningParticleDNNOnlyOneHotMoreSeeds/193_4_33_none	none		0.05
IndivQLearningParticleDNNOnlyOneHotMoreSeeds/194_4_34	slugs_decentralized	shields/momentum_shield	True	-10	False	ParticleMomentum	False	False	10	-30	Individual_Deep_Q	1.0	simple_mlp	True	0.05	2500000	44	True	IndivQLearningParticleDNNOnlyOneHotMoreSeeds/194_4_34_slugs_centralized	slugs_centralized	shields/momentum_shield	0.05
IndivQLearningParticleDNNOnlyOneHotMoreSeeds/194_4_34	slugs_decentralized	shields/momentum_shield	True	-10	False	ParticleMomentum	False	False	10	-30	Individual_Deep_Q	1.0	simple_mlp	True	0.05	2500000	44	True	IndivQLearningParticleDNNOnlyOneHotMoreSeeds/194_4_34_slugs_decentralized	slugs_decentralized	shields/momentum_shield	0.05
IndivQLearningParticleDNNOnlyOneHotMoreSeeds/194_4_34	slugs_decentralized	shields/momentum_shield	True	-10	False	ParticleMomentum	False	False	10	-30	Individual_Deep_Q	1.0	simple_mlp	True	0.05	2500000	44	True	IndivQLearningParticleDNNOnlyOneHotMoreSeeds/194_4_34_none	none		0.05
IndivQLearningParticleDNNOnlyOneHotMoreSeeds/195_4_35	slugs_decentralized	shields/momentum_shield	True	-10	False	ParticleMomentum	False	False	10	-30	Individual_Deep_Q	1.0	simple_mlp	True	0.05	2500000	45	True	IndivQLearningParticleDNNOnlyOneHotMoreSeeds/195_4_35_slugs_centralized	slugs_centralized	shields/momentum_shield	0.05
IndivQLearningParticleDNNOnlyOneHotMoreSeeds/195_4_35	slugs_decentralized	shields/momentum_shield	True	-10	False	ParticleMomentum	False	False	10	-30	Individual_Deep_Q	1.0	simple_mlp	True	0.05	2500000	45	True	IndivQLearningParticleDNNOnlyOneHotMoreSeeds/195_4_35_slugs_decentralized	slugs_decentralized	shields/momentum_shield	0.05
IndivQLearningParticleDNNOnlyOneHotMoreSeeds/195_4_35	slugs_decentralized	shields/momentum_shield	True	-10	False	ParticleMomentum	False	False	10	-30	Individual_Deep_Q	1.0	simple_mlp	True	0.05	2500000	45	True	IndivQLearningParticleDNNOnlyOneHotMoreSeeds/195_4_35_none	none		0.05
IndivQLearningParticleDNNOnlyOneHotMoreSeeds/196_4_36	slugs_decentralized	shields/momentum_shield	True	-10	False	ParticleMomentum	False	False	10	-30	Individual_Deep_Q	1.0	simple_mlp	True	0.05	2500000	46	True	IndivQLearningParticleDNNOnlyOneHotMoreSeeds/196_4_36_slugs_centralized	slugs_centralized	shields/momentum_shield	0.05
IndivQLearningParticleDNNOnlyOneHotMoreSeeds/196_4_36	slugs_decentralized	shields/momentum_shield	True	-10	False	ParticleMomentum	False	False	10	-30	Individual_Deep_Q	1.0	simple_mlp	True	0.05	2500000	46	True	IndivQLearningParticleDNNOnlyOneHotMoreSeeds/196_4_36_slugs_decentralized	slugs_decentralized	shields/momentum_shield	0.05
IndivQLearningParticleDNNOnlyOneHotMoreSeeds/196_4_36	slugs_decentralized	shields/momentum_shield	True	-10	False	ParticleMomentum	False	False	10	-30	Individual_Deep_Q	1.0	simple_mlp	True	0.05	2500000	46	True	IndivQLearningParticleDNNOnlyOneHotMoreSeeds/196_4_36_none	none		0.05
IndivQLearningParticleDNNOnlyOneHotMoreSeeds/197_4_37	slugs_decentralized	shields/momentum_shield	True	-10	False	ParticleMomentum	False	False	10	-30	Individual_Deep_Q	1.0	simple_mlp	True	0.05	2500000	47	True	IndivQLearningParticleDNNOnlyOneHotMoreSeeds/197_4_37_slugs_centralized	slugs_centralized	shields/momentum_shield	0.05
IndivQLearningParticleDNNOnlyOneHotMoreSeeds/197_4_37	slugs_decentralized	shields/momentum_shield	True	-10	False	ParticleMomentum	False	False	10	-30	Individual_Deep_Q	1.0	simple_mlp	True	0.05	2500000	47	True	IndivQLearningParticleDNNOnlyOneHotMoreSeeds/197_4_37_slugs_decentralized	slugs_decentralized	shields/momentum_shield	0.05
IndivQLearningParticleDNNOnlyOneHotMoreSeeds/197_4_37	slugs_decentralized	shields/momentum_shield	True	-10	False	ParticleMomentum	False	False	10	-30	Individual_Deep_Q	1.0	simple_mlp	True	0.05	2500000	47	True	IndivQLearningParticleDNNOnlyOneHotMoreSeeds/197_4_37_none	none		0.05
IndivQLearningParticleDNNOnlyOneHotMoreSeeds/198_4_38	slugs_decentralized	shields/momentum_shield	True	-10	False	ParticleMomentum	False	False	10	-30	Individual_Deep_Q	1.0	simple_mlp	True	0.05	2500000	48	True	IndivQLearningParticleDNNOnlyOneHotMoreSeeds/198_4_38_slugs_centralized	slugs_centralized	shields/momentum_shield	0.05
IndivQLearningParticleDNNOnlyOneHotMoreSeeds/198_4_38	slugs_decentralized	shields/momentum_shield	True	-10	False	ParticleMomentum	False	False	10	-30	Individual_Deep_Q	1.0	simple_mlp	True	0.05	2500000	48	True	IndivQLearningParticleDNNOnlyOneHotMoreSeeds/198_4_38_slugs_decentralized	slugs_decentralized	shields/momentum_shield	0.05
IndivQLearningParticleDNNOnlyOneHotMoreSeeds/198_4_38	slugs_decentralized	shields/momentum_shield	True	-10	False	ParticleMomentum	False	False	10	-30	Individual_Deep_Q	1.0	simple_mlp	True	0.05	2500000	48	True	IndivQLearningParticleDNNOnlyOneHotMoreSeeds/198_4_38_none	none		0.05
IndivQLearningParticleDNNOnlyOneHotMoreSeeds/199_4_39	slugs_decentralized	shields/momentum_shield	True	-10	False	ParticleMomentum	False	False	10	-30	Individual_Deep_Q	1.0	simple_mlp	True	0.05	2500000	49	True	IndivQLearningParticleDNNOnlyOneHotMoreSeeds/199_4_39_slugs_centralized	slugs_centralized	shields/momentum_shield	0.05
IndivQLearningParticleDNNOnlyOneHotMoreSeeds/199_4_39	slugs_decentralized	shields/momentum_shield	True	-10	False	ParticleMomentum	False	False	10	-30	Individual_Deep_Q	1.0	simple_mlp	True	0.05	2500000	49	True	IndivQLearningParticleDNNOnlyOneHotMoreSeeds/199_4_39_slugs_decentralized	slugs_decentralized	shields/momentum_shield	0.05
IndivQLearningParticleDNNOnlyOneHotMoreSeeds/199_4_39	slugs_decentralized	shields/momentum_shield	True	-10	False	ParticleMomentum	False	False	10	-30	Individual_Deep_Q	1.0	simple_mlp	True	0.05	2500000	49	True	IndivQLearningParticleDNNOnlyOneHotMoreSeeds/199_4_39_none	none		0.05
IndivQLearningParticleDNNOnlyOneHotMoreSeeds/200_5_0	none		True	-10	False	ParticleMomentum	False	False	10	-30	Individual_Deep_Q	1.0	simple_mlp	True	0.05	2500000	10	True	IndivQLearningParticleDNNOnlyOneHotMoreSeeds/200_5_0_slugs_centralized	slugs_centralized	shields/momentum_shield	0.05
IndivQLearningParticleDNNOnlyOneHotMoreSeeds/200_5_0	none		True	-10	False	ParticleMomentum	False	False	10	-30	Individual_Deep_Q	1.0	simple_mlp	True	0.05	2500000	10	True	IndivQLearningParticleDNNOnlyOneHotMoreSeeds/200_5_0_slugs_decentralized	slugs_decentralized	shields/momentum_shield	0.05
IndivQLearningParticleDNNOnlyOneHotMoreSeeds/200_5_0	none		True	-10	False	ParticleMomentum	False	False	10	-30	Individual_Deep_Q	1.0	simple_mlp	True	0.05	2500000	10	True	IndivQLearningParticleDNNOnlyOneHotMoreSeeds/200_5_0_none	none		0.05
IndivQLearningParticleDNNOnlyOneHotMoreSeeds/201_5_1	none		True	-10	False	ParticleMomentum	False	False	10	-30	Individual_Deep_Q	1.0	simple_mlp	True	0.05	2500000	11	True	IndivQLearningParticleDNNOnlyOneHotMoreSeeds/201_5_1_slugs_centralized	slugs_centralized	shields/momentum_shield	0.05
IndivQLearningParticleDNNOnlyOneHotMoreSeeds/201_5_1	none		True	-10	False	ParticleMomentum	False	False	10	-30	Individual_Deep_Q	1.0	simple_mlp	True	0.05	2500000	11	True	IndivQLearningParticleDNNOnlyOneHotMoreSeeds/201_5_1_slugs_decentralized	slugs_decentralized	shields/momentum_shield	0.05
IndivQLearningParticleDNNOnlyOneHotMoreSeeds/201_5_1	none		True	-10	False	ParticleMomentum	False	False	10	-30	Individual_Deep_Q	1.0	simple_mlp	True	0.05	2500000	11	True	IndivQLearningParticleDNNOnlyOneHotMoreSeeds/201_5_1_none	none		0.05
IndivQLearningParticleDNNOnlyOneHotMoreSeeds/202_5_2	none		True	-10	False	ParticleMomentum	False	False	10	-30	Individual_Deep_Q	1.0	simple_mlp	True	0.05	2500000	12	True	IndivQLearningParticleDNNOnlyOneHotMoreSeeds/202_5_2_slugs_centralized	slugs_centralized	shields/momentum_shield	0.05
IndivQLearningParticleDNNOnlyOneHotMoreSeeds/202_5_2	none		True	-10	False	ParticleMomentum	False	False	10	-30	Individual_Deep_Q	1.0	simple_mlp	True	0.05	2500000	12	True	IndivQLearningParticleDNNOnlyOneHotMoreSeeds/202_5_2_slugs_decentralized	slugs_decentralized	shields/momentum_shield	0.05
IndivQLearningParticleDNNOnlyOneHotMoreSeeds/202_5_2	none		True	-10	False	ParticleMomentum	False	False	10	-30	Individual_Deep_Q	1.0	simple_mlp	True	0.05	2500000	12	True	IndivQLearningParticleDNNOnlyOneHotMoreSeeds/202_5_2_none	none		0.05
IndivQLearningParticleDNNOnlyOneHotMoreSeeds/203_5_3	none		True	-10	False	ParticleMomentum	False	False	10	-30	Individual_Deep_Q	1.0	simple_mlp	True	0.05	2500000	13	True	IndivQLearningParticleDNNOnlyOneHotMoreSeeds/203_5_3_slugs_centralized	slugs_centralized	shields/momentum_shield	0.05
IndivQLearningParticleDNNOnlyOneHotMoreSeeds/203_5_3	none		True	-10	False	ParticleMomentum	False	False	10	-30	Individual_Deep_Q	1.0	simple_mlp	True	0.05	2500000	13	True	IndivQLearningParticleDNNOnlyOneHotMoreSeeds/203_5_3_slugs_decentralized	slugs_decentralized	shields/momentum_shield	0.05
IndivQLearningParticleDNNOnlyOneHotMoreSeeds/203_5_3	none		True	-10	False	ParticleMomentum	False	False	10	-30	Individual_Deep_Q	1.0	simple_mlp	True	0.05	2500000	13	True	IndivQLearningParticleDNNOnlyOneHotMoreSeeds/203_5_3_none	none		0.05
IndivQLearningParticleDNNOnlyOneHotMoreSeeds/204_5_4	none		True	-10	False	ParticleMomentum	False	False	10	-30	Individual_Deep_Q	1.0	simple_mlp	True	0.05	2500000	14	True	IndivQLearningParticleDNNOnlyOneHotMoreSeeds/204_5_4_slugs_centralized	slugs_centralized	shields/momentum_shield	0.05
IndivQLearningParticleDNNOnlyOneHotMoreSeeds/204_5_4	none		True	-10	False	ParticleMomentum	False	False	10	-30	Individual_Deep_Q	1.0	simple_mlp	True	0.05	2500000	14	True	IndivQLearningParticleDNNOnlyOneHotMoreSeeds/204_5_4_slugs_decentralized	slugs_decentralized	shields/momentum_shield	0.05
IndivQLearningParticleDNNOnlyOneHotMoreSeeds/204_5_4	none		True	-10	False	ParticleMomentum	False	False	10	-30	Individual_Deep_Q	1.0	simple_mlp	True	0.05	2500000	14	True	IndivQLearningParticleDNNOnlyOneHotMoreSeeds/204_5_4_none	none		0.05
IndivQLearningParticleDNNOnlyOneHotMoreSeeds/205_5_5	none		True	-10	False	ParticleMomentum	False	False	10	-30	Individual_Deep_Q	1.0	simple_mlp	True	0.05	2500000	15	True	IndivQLearningParticleDNNOnlyOneHotMoreSeeds/205_5_5_slugs_centralized	slugs_centralized	shields/momentum_shield	0.05
IndivQLearningParticleDNNOnlyOneHotMoreSeeds/205_5_5	none		True	-10	False	ParticleMomentum	False	False	10	-30	Individual_Deep_Q	1.0	simple_mlp	True	0.05	2500000	15	True	IndivQLearningParticleDNNOnlyOneHotMoreSeeds/205_5_5_slugs_decentralized	slugs_decentralized	shields/momentum_shield	0.05
IndivQLearningParticleDNNOnlyOneHotMoreSeeds/205_5_5	none		True	-10	False	ParticleMomentum	False	False	10	-30	Individual_Deep_Q	1.0	simple_mlp	True	0.05	2500000	15	True	IndivQLearningParticleDNNOnlyOneHotMoreSeeds/205_5_5_none	none		0.05
IndivQLearningParticleDNNOnlyOneHotMoreSeeds/206_5_6	none		True	-10	False	ParticleMomentum	False	False	10	-30	Individual_Deep_Q	1.0	simple_mlp	True	0.05	2500000	16	True	IndivQLearningParticleDNNOnlyOneHotMoreSeeds/206_5_6_slugs_centralized	slugs_centralized	shields/momentum_shield	0.05
IndivQLearningParticleDNNOnlyOneHotMoreSeeds/206_5_6	none		True	-10	False	ParticleMomentum	False	False	10	-30	Individual_Deep_Q	1.0	simple_mlp	True	0.05	2500000	16	True	IndivQLearningParticleDNNOnlyOneHotMoreSeeds/206_5_6_slugs_decentralized	slugs_decentralized	shields/momentum_shield	0.05
IndivQLearningParticleDNNOnlyOneHotMoreSeeds/206_5_6	none		True	-10	False	ParticleMomentum	False	False	10	-30	Individual_Deep_Q	1.0	simple_mlp	True	0.05	2500000	16	True	IndivQLearningParticleDNNOnlyOneHotMoreSeeds/206_5_6_none	none		0.05
IndivQLearningParticleDNNOnlyOneHotMoreSeeds/207_5_7	none		True	-10	False	ParticleMomentum	False	False	10	-30	Individual_Deep_Q	1.0	simple_mlp	True	0.05	2500000	17	True	IndivQLearningParticleDNNOnlyOneHotMoreSeeds/207_5_7_slugs_centralized	slugs_centralized	shields/momentum_shield	0.05
IndivQLearningParticleDNNOnlyOneHotMoreSeeds/207_5_7	none		True	-10	False	ParticleMomentum	False	False	10	-30	Individual_Deep_Q	1.0	simple_mlp	True	0.05	2500000	17	True	IndivQLearningParticleDNNOnlyOneHotMoreSeeds/207_5_7_slugs_decentralized	slugs_decentralized	shields/momentum_shield	0.05
IndivQLearningParticleDNNOnlyOneHotMoreSeeds/207_5_7	none		True	-10	False	ParticleMomentum	False	False	10	-30	Individual_Deep_Q	1.0	simple_mlp	True	0.05	2500000	17	True	IndivQLearningParticleDNNOnlyOneHotMoreSeeds/207_5_7_none	none		0.05
IndivQLearningParticleDNNOnlyOneHotMoreSeeds/208_5_8	none		True	-10	False	ParticleMomentum	False	False	10	-30	Individual_Deep_Q	1.0	simple_mlp	True	0.05	2500000	18	True	IndivQLearningParticleDNNOnlyOneHotMoreSeeds/208_5_8_slugs_centralized	slugs_centralized	shields/momentum_shield	0.05
IndivQLearningParticleDNNOnlyOneHotMoreSeeds/208_5_8	none		True	-10	False	ParticleMomentum	False	False	10	-30	Individual_Deep_Q	1.0	simple_mlp	True	0.05	2500000	18	True	IndivQLearningParticleDNNOnlyOneHotMoreSeeds/208_5_8_slugs_decentralized	slugs_decentralized	shields/momentum_shield	0.05
IndivQLearningParticleDNNOnlyOneHotMoreSeeds/208_5_8	none		True	-10	False	ParticleMomentum	False	False	10	-30	Individual_Deep_Q	1.0	simple_mlp	True	0.05	2500000	18	True	IndivQLearningParticleDNNOnlyOneHotMoreSeeds/208_5_8_none	none		0.05
IndivQLearningParticleDNNOnlyOneHotMoreSeeds/209_5_9	none		True	-10	False	ParticleMomentum	False	False	10	-30	Individual_Deep_Q	1.0	simple_mlp	True	0.05	2500000	19	True	IndivQLearningParticleDNNOnlyOneHotMoreSeeds/209_5_9_slugs_centralized	slugs_centralized	shields/momentum_shield	0.05
IndivQLearningParticleDNNOnlyOneHotMoreSeeds/209_5_9	none		True	-10	False	ParticleMomentum	False	False	10	-30	Individual_Deep_Q	1.0	simple_mlp	True	0.05	2500000	19	True	IndivQLearningParticleDNNOnlyOneHotMoreSeeds/209_5_9_slugs_decentralized	slugs_decentralized	shields/momentum_shield	0.05
IndivQLearningParticleDNNOnlyOneHotMoreSeeds/209_5_9	none		True	-10	False	ParticleMomentum	False	False	10	-30	Individual_Deep_Q	1.0	simple_mlp	True	0.05	2500000	19	True	IndivQLearningParticleDNNOnlyOneHotMoreSeeds/209_5_9_none	none		0.05
IndivQLearningParticleDNNOnlyOneHotMoreSeeds/210_5_10	none		True	-10	False	ParticleMomentum	False	False	10	-30	Individual_Deep_Q	1.0	simple_mlp	True	0.05	2500000	20	True	IndivQLearningParticleDNNOnlyOneHotMoreSeeds/210_5_10_slugs_centralized	slugs_centralized	shields/momentum_shield	0.05
IndivQLearningParticleDNNOnlyOneHotMoreSeeds/210_5_10	none		True	-10	False	ParticleMomentum	False	False	10	-30	Individual_Deep_Q	1.0	simple_mlp	True	0.05	2500000	20	True	IndivQLearningParticleDNNOnlyOneHotMoreSeeds/210_5_10_slugs_decentralized	slugs_decentralized	shields/momentum_shield	0.05
IndivQLearningParticleDNNOnlyOneHotMoreSeeds/210_5_10	none		True	-10	False	ParticleMomentum	False	False	10	-30	Individual_Deep_Q	1.0	simple_mlp	True	0.05	2500000	20	True	IndivQLearningParticleDNNOnlyOneHotMoreSeeds/210_5_10_none	none		0.05
IndivQLearningParticleDNNOnlyOneHotMoreSeeds/211_5_11	none		True	-10	False	ParticleMomentum	False	False	10	-30	Individual_Deep_Q	1.0	simple_mlp	True	0.05	2500000	21	True	IndivQLearningParticleDNNOnlyOneHotMoreSeeds/211_5_11_slugs_centralized	slugs_centralized	shields/momentum_shield	0.05
IndivQLearningParticleDNNOnlyOneHotMoreSeeds/211_5_11	none		True	-10	False	ParticleMomentum	False	False	10	-30	Individual_Deep_Q	1.0	simple_mlp	True	0.05	2500000	21	True	IndivQLearningParticleDNNOnlyOneHotMoreSeeds/211_5_11_slugs_decentralized	slugs_decentralized	shields/momentum_shield	0.05
IndivQLearningParticleDNNOnlyOneHotMoreSeeds/211_5_11	none		True	-10	False	ParticleMomentum	False	False	10	-30	Individual_Deep_Q	1.0	simple_mlp	True	0.05	2500000	21	True	IndivQLearningParticleDNNOnlyOneHotMoreSeeds/211_5_11_none	none		0.05
IndivQLearningParticleDNNOnlyOneHotMoreSeeds/212_5_12	none		True	-10	False	ParticleMomentum	False	False	10	-30	Individual_Deep_Q	1.0	simple_mlp	True	0.05	2500000	22	True	IndivQLearningParticleDNNOnlyOneHotMoreSeeds/212_5_12_slugs_centralized	slugs_centralized	shields/momentum_shield	0.05
IndivQLearningParticleDNNOnlyOneHotMoreSeeds/212_5_12	none		True	-10	False	ParticleMomentum	False	False	10	-30	Individual_Deep_Q	1.0	simple_mlp	True	0.05	2500000	22	True	IndivQLearningParticleDNNOnlyOneHotMoreSeeds/212_5_12_slugs_decentralized	slugs_decentralized	shields/momentum_shield	0.05
IndivQLearningParticleDNNOnlyOneHotMoreSeeds/212_5_12	none		True	-10	False	ParticleMomentum	False	False	10	-30	Individual_Deep_Q	1.0	simple_mlp	True	0.05	2500000	22	True	IndivQLearningParticleDNNOnlyOneHotMoreSeeds/212_5_12_none	none		0.05
IndivQLearningParticleDNNOnlyOneHotMoreSeeds/213_5_13	none		True	-10	False	ParticleMomentum	False	False	10	-30	Individual_Deep_Q	1.0	simple_mlp	True	0.05	2500000	23	True	IndivQLearningParticleDNNOnlyOneHotMoreSeeds/213_5_13_slugs_centralized	slugs_centralized	shields/momentum_shield	0.05
IndivQLearningParticleDNNOnlyOneHotMoreSeeds/213_5_13	none		True	-10	False	ParticleMomentum	False	False	10	-30	Individual_Deep_Q	1.0	simple_mlp	True	0.05	2500000	23	True	IndivQLearningParticleDNNOnlyOneHotMoreSeeds/213_5_13_slugs_decentralized	slugs_decentralized	shields/momentum_shield	0.05
IndivQLearningParticleDNNOnlyOneHotMoreSeeds/213_5_13	none		True	-10	False	ParticleMomentum	False	False	10	-30	Individual_Deep_Q	1.0	simple_mlp	True	0.05	2500000	23	True	IndivQLearningParticleDNNOnlyOneHotMoreSeeds/213_5_13_none	none		0.05
IndivQLearningParticleDNNOnlyOneHotMoreSeeds/214_5_14	none		True	-10	False	ParticleMomentum	False	False	10	-30	Individual_Deep_Q	1.0	simple_mlp	True	0.05	2500000	24	True	IndivQLearningParticleDNNOnlyOneHotMoreSeeds/214_5_14_slugs_centralized	slugs_centralized	shields/momentum_shield	0.05
IndivQLearningParticleDNNOnlyOneHotMoreSeeds/214_5_14	none		True	-10	False	ParticleMomentum	False	False	10	-30	Individual_Deep_Q	1.0	simple_mlp	True	0.05	2500000	24	True	IndivQLearningParticleDNNOnlyOneHotMoreSeeds/214_5_14_slugs_decentralized	slugs_decentralized	shields/momentum_shield	0.05
IndivQLearningParticleDNNOnlyOneHotMoreSeeds/214_5_14	none		True	-10	False	ParticleMomentum	False	False	10	-30	Individual_Deep_Q	1.0	simple_mlp	True	0.05	2500000	24	True	IndivQLearningParticleDNNOnlyOneHotMoreSeeds/214_5_14_none	none		0.05
IndivQLearningParticleDNNOnlyOneHotMoreSeeds/215_5_15	none		True	-10	False	ParticleMomentum	False	False	10	-30	Individual_Deep_Q	1.0	simple_mlp	True	0.05	2500000	25	True	IndivQLearningParticleDNNOnlyOneHotMoreSeeds/215_5_15_slugs_centralized	slugs_centralized	shields/momentum_shield	0.05
IndivQLearningParticleDNNOnlyOneHotMoreSeeds/215_5_15	none		True	-10	False	ParticleMomentum	False	False	10	-30	Individual_Deep_Q	1.0	simple_mlp	True	0.05	2500000	25	True	IndivQLearningParticleDNNOnlyOneHotMoreSeeds/215_5_15_slugs_decentralized	slugs_decentralized	shields/momentum_shield	0.05
IndivQLearningParticleDNNOnlyOneHotMoreSeeds/215_5_15	none		True	-10	False	ParticleMomentum	False	False	10	-30	Individual_Deep_Q	1.0	simple_mlp	True	0.05	2500000	25	True	IndivQLearningParticleDNNOnlyOneHotMoreSeeds/215_5_15_none	none		0.05
IndivQLearningParticleDNNOnlyOneHotMoreSeeds/216_5_16	none		True	-10	False	ParticleMomentum	False	False	10	-30	Individual_Deep_Q	1.0	simple_mlp	True	0.05	2500000	26	True	IndivQLearningParticleDNNOnlyOneHotMoreSeeds/216_5_16_slugs_centralized	slugs_centralized	shields/momentum_shield	0.05
IndivQLearningParticleDNNOnlyOneHotMoreSeeds/216_5_16	none		True	-10	False	ParticleMomentum	False	False	10	-30	Individual_Deep_Q	1.0	simple_mlp	True	0.05	2500000	26	True	IndivQLearningParticleDNNOnlyOneHotMoreSeeds/216_5_16_slugs_decentralized	slugs_decentralized	shields/momentum_shield	0.05
IndivQLearningParticleDNNOnlyOneHotMoreSeeds/216_5_16	none		True	-10	False	ParticleMomentum	False	False	10	-30	Individual_Deep_Q	1.0	simple_mlp	True	0.05	2500000	26	True	IndivQLearningParticleDNNOnlyOneHotMoreSeeds/216_5_16_none	none		0.05
IndivQLearningParticleDNNOnlyOneHotMoreSeeds/217_5_17	none		True	-10	False	ParticleMomentum	False	False	10	-30	Individual_Deep_Q	1.0	simple_mlp	True	0.05	2500000	27	True	IndivQLearningParticleDNNOnlyOneHotMoreSeeds/217_5_17_slugs_centralized	slugs_centralized	shields/momentum_shield	0.05
IndivQLearningParticleDNNOnlyOneHotMoreSeeds/217_5_17	none		True	-10	False	ParticleMomentum	False	False	10	-30	Individual_Deep_Q	1.0	simple_mlp	True	0.05	2500000	27	True	IndivQLearningParticleDNNOnlyOneHotMoreSeeds/217_5_17_slugs_decentralized	slugs_decentralized	shields/momentum_shield	0.05
IndivQLearningParticleDNNOnlyOneHotMoreSeeds/217_5_17	none		True	-10	False	ParticleMomentum	False	False	10	-30	Individual_Deep_Q	1.0	simple_mlp	True	0.05	2500000	27	True	IndivQLearningParticleDNNOnlyOneHotMoreSeeds/217_5_17_none	none		0.05
IndivQLearningParticleDNNOnlyOneHotMoreSeeds/218_5_18	none		True	-10	False	ParticleMomentum	False	False	10	-30	Individual_Deep_Q	1.0	simple_mlp	True	0.05	2500000	28	True	IndivQLearningParticleDNNOnlyOneHotMoreSeeds/218_5_18_slugs_centralized	slugs_centralized	shields/momentum_shield	0.05
IndivQLearningParticleDNNOnlyOneHotMoreSeeds/218_5_18	none		True	-10	False	ParticleMomentum	False	False	10	-30	Individual_Deep_Q	1.0	simple_mlp	True	0.05	2500000	28	True	IndivQLearningParticleDNNOnlyOneHotMoreSeeds/218_5_18_slugs_decentralized	slugs_decentralized	shields/momentum_shield	0.05
IndivQLearningParticleDNNOnlyOneHotMoreSeeds/218_5_18	none		True	-10	False	ParticleMomentum	False	False	10	-30	Individual_Deep_Q	1.0	simple_mlp	True	0.05	2500000	28	True	IndivQLearningParticleDNNOnlyOneHotMoreSeeds/218_5_18_none	none		0.05
IndivQLearningParticleDNNOnlyOneHotMoreSeeds/219_5_19	none		True	-10	False	ParticleMomentum	False	False	10	-30	Individual_Deep_Q	1.0	simple_mlp	True	0.05	2500000	29	True	IndivQLearningParticleDNNOnlyOneHotMoreSeeds/219_5_19_slugs_centralized	slugs_centralized	shields/momentum_shield	0.05
IndivQLearningParticleDNNOnlyOneHotMoreSeeds/219_5_19	none		True	-10	False	ParticleMomentum	False	False	10	-30	Individual_Deep_Q	1.0	simple_mlp	True	0.05	2500000	29	True	IndivQLearningParticleDNNOnlyOneHotMoreSeeds/219_5_19_slugs_decentralized	slugs_decentralized	shields/momentum_shield	0.05
IndivQLearningParticleDNNOnlyOneHotMoreSeeds/219_5_19	none		True	-10	False	ParticleMomentum	False	False	10	-30	Individual_Deep_Q	1.0	simple_mlp	True	0.05	2500000	29	True	IndivQLearningParticleDNNOnlyOneHotMoreSeeds/219_5_19_none	none		0.05
IndivQLearningParticleDNNOnlyOneHotMoreSeeds/220_5_20	none		True	-10	False	ParticleMomentum	False	False	10	-30	Individual_Deep_Q	1.0	simple_mlp	True	0.05	2500000	30	True	IndivQLearningParticleDNNOnlyOneHotMoreSeeds/220_5_20_slugs_centralized	slugs_centralized	shields/momentum_shield	0.05
IndivQLearningParticleDNNOnlyOneHotMoreSeeds/220_5_20	none		True	-10	False	ParticleMomentum	False	False	10	-30	Individual_Deep_Q	1.0	simple_mlp	True	0.05	2500000	30	True	IndivQLearningParticleDNNOnlyOneHotMoreSeeds/220_5_20_slugs_decentralized	slugs_decentralized	shields/momentum_shield	0.05
IndivQLearningParticleDNNOnlyOneHotMoreSeeds/220_5_20	none		True	-10	False	ParticleMomentum	False	False	10	-30	Individual_Deep_Q	1.0	simple_mlp	True	0.05	2500000	30	True	IndivQLearningParticleDNNOnlyOneHotMoreSeeds/220_5_20_none	none		0.05
IndivQLearningParticleDNNOnlyOneHotMoreSeeds/221_5_21	none		True	-10	False	ParticleMomentum	False	False	10	-30	Individual_Deep_Q	1.0	simple_mlp	True	0.05	2500000	31	True	IndivQLearningParticleDNNOnlyOneHotMoreSeeds/221_5_21_slugs_centralized	slugs_centralized	shields/momentum_shield	0.05
IndivQLearningParticleDNNOnlyOneHotMoreSeeds/221_5_21	none		True	-10	False	ParticleMomentum	False	False	10	-30	Individual_Deep_Q	1.0	simple_mlp	True	0.05	2500000	31	True	IndivQLearningParticleDNNOnlyOneHotMoreSeeds/221_5_21_slugs_decentralized	slugs_decentralized	shields/momentum_shield	0.05
IndivQLearningParticleDNNOnlyOneHotMoreSeeds/221_5_21	none		True	-10	False	ParticleMomentum	False	False	10	-30	Individual_Deep_Q	1.0	simple_mlp	True	0.05	2500000	31	True	IndivQLearningParticleDNNOnlyOneHotMoreSeeds/221_5_21_none	none		0.05
IndivQLearningParticleDNNOnlyOneHotMoreSeeds/222_5_22	none		True	-10	False	ParticleMomentum	False	False	10	-30	Individual_Deep_Q	1.0	simple_mlp	True	0.05	2500000	32	True	IndivQLearningParticleDNNOnlyOneHotMoreSeeds/222_5_22_slugs_centralized	slugs_centralized	shields/momentum_shield	0.05
IndivQLearningParticleDNNOnlyOneHotMoreSeeds/222_5_22	none		True	-10	False	ParticleMomentum	False	False	10	-30	Individual_Deep_Q	1.0	simple_mlp	True	0.05	2500000	32	True	IndivQLearningParticleDNNOnlyOneHotMoreSeeds/222_5_22_slugs_decentralized	slugs_decentralized	shields/momentum_shield	0.05
IndivQLearningParticleDNNOnlyOneHotMoreSeeds/222_5_22	none		True	-10	False	ParticleMomentum	False	False	10	-30	Individual_Deep_Q	1.0	simple_mlp	True	0.05	2500000	32	True	IndivQLearningParticleDNNOnlyOneHotMoreSeeds/222_5_22_none	none		0.05
IndivQLearningParticleDNNOnlyOneHotMoreSeeds/223_5_23	none		True	-10	False	ParticleMomentum	False	False	10	-30	Individual_Deep_Q	1.0	simple_mlp	True	0.05	2500000	33	True	IndivQLearningParticleDNNOnlyOneHotMoreSeeds/223_5_23_slugs_centralized	slugs_centralized	shields/momentum_shield	0.05
IndivQLearningParticleDNNOnlyOneHotMoreSeeds/223_5_23	none		True	-10	False	ParticleMomentum	False	False	10	-30	Individual_Deep_Q	1.0	simple_mlp	True	0.05	2500000	33	True	IndivQLearningParticleDNNOnlyOneHotMoreSeeds/223_5_23_slugs_decentralized	slugs_decentralized	shields/momentum_shield	0.05
IndivQLearningParticleDNNOnlyOneHotMoreSeeds/223_5_23	none		True	-10	False	ParticleMomentum	False	False	10	-30	Individual_Deep_Q	1.0	simple_mlp	True	0.05	2500000	33	True	IndivQLearningParticleDNNOnlyOneHotMoreSeeds/223_5_23_none	none		0.05
IndivQLearningParticleDNNOnlyOneHotMoreSeeds/224_5_24	none		True	-10	False	ParticleMomentum	False	False	10	-30	Individual_Deep_Q	1.0	simple_mlp	True	0.05	2500000	34	True	IndivQLearningParticleDNNOnlyOneHotMoreSeeds/224_5_24_slugs_centralized	slugs_centralized	shields/momentum_shield	0.05
IndivQLearningParticleDNNOnlyOneHotMoreSeeds/224_5_24	none		True	-10	False	ParticleMomentum	False	False	10	-30	Individual_Deep_Q	1.0	simple_mlp	True	0.05	2500000	34	True	IndivQLearningParticleDNNOnlyOneHotMoreSeeds/224_5_24_slugs_decentralized	slugs_decentralized	shields/momentum_shield	0.05
IndivQLearningParticleDNNOnlyOneHotMoreSeeds/224_5_24	none		True	-10	False	ParticleMomentum	False	False	10	-30	Individual_Deep_Q	1.0	simple_mlp	True	0.05	2500000	34	True	IndivQLearningParticleDNNOnlyOneHotMoreSeeds/224_5_24_none	none		0.05
IndivQLearningParticleDNNOnlyOneHotMoreSeeds/225_5_25	none		True	-10	False	ParticleMomentum	False	False	10	-30	Individual_Deep_Q	1.0	simple_mlp	True	0.05	2500000	35	True	IndivQLearningParticleDNNOnlyOneHotMoreSeeds/225_5_25_slugs_centralized	slugs_centralized	shields/momentum_shield	0.05
IndivQLearningParticleDNNOnlyOneHotMoreSeeds/225_5_25	none		True	-10	False	ParticleMomentum	False	False	10	-30	Individual_Deep_Q	1.0	simple_mlp	True	0.05	2500000	35	True	IndivQLearningParticleDNNOnlyOneHotMoreSeeds/225_5_25_slugs_decentralized	slugs_decentralized	shields/momentum_shield	0.05
IndivQLearningParticleDNNOnlyOneHotMoreSeeds/225_5_25	none		True	-10	False	ParticleMomentum	False	False	10	-30	Individual_Deep_Q	1.0	simple_mlp	True	0.05	2500000	35	True	IndivQLearningParticleDNNOnlyOneHotMoreSeeds/225_5_25_none	none		0.05
IndivQLearningParticleDNNOnlyOneHotMoreSeeds/226_5_26	none		True	-10	False	ParticleMomentum	False	False	10	-30	Individual_Deep_Q	1.0	simple_mlp	True	0.05	2500000	36	True	IndivQLearningParticleDNNOnlyOneHotMoreSeeds/226_5_26_slugs_centralized	slugs_centralized	shields/momentum_shield	0.05
IndivQLearningParticleDNNOnlyOneHotMoreSeeds/226_5_26	none		True	-10	False	ParticleMomentum	False	False	10	-30	Individual_Deep_Q	1.0	simple_mlp	True	0.05	2500000	36	True	IndivQLearningParticleDNNOnlyOneHotMoreSeeds/226_5_26_slugs_decentralized	slugs_decentralized	shields/momentum_shield	0.05
IndivQLearningParticleDNNOnlyOneHotMoreSeeds/226_5_26	none		True	-10	False	ParticleMomentum	False	False	10	-30	Individual_Deep_Q	1.0	simple_mlp	True	0.05	2500000	36	True	IndivQLearningParticleDNNOnlyOneHotMoreSeeds/226_5_26_none	none		0.05
IndivQLearningParticleDNNOnlyOneHotMoreSeeds/227_5_27	none		True	-10	False	ParticleMomentum	False	False	10	-30	Individual_Deep_Q	1.0	simple_mlp	True	0.05	2500000	37	True	IndivQLearningParticleDNNOnlyOneHotMoreSeeds/227_5_27_slugs_centralized	slugs_centralized	shields/momentum_shield	0.05
IndivQLearningParticleDNNOnlyOneHotMoreSeeds/227_5_27	none		True	-10	False	ParticleMomentum	False	False	10	-30	Individual_Deep_Q	1.0	simple_mlp	True	0.05	2500000	37	True	IndivQLearningParticleDNNOnlyOneHotMoreSeeds/227_5_27_slugs_decentralized	slugs_decentralized	shields/momentum_shield	0.05
IndivQLearningParticleDNNOnlyOneHotMoreSeeds/227_5_27	none		True	-10	False	ParticleMomentum	False	False	10	-30	Individual_Deep_Q	1.0	simple_mlp	True	0.05	2500000	37	True	IndivQLearningParticleDNNOnlyOneHotMoreSeeds/227_5_27_none	none		0.05
IndivQLearningParticleDNNOnlyOneHotMoreSeeds/228_5_28	none		True	-10	False	ParticleMomentum	False	False	10	-30	Individual_Deep_Q	1.0	simple_mlp	True	0.05	2500000	38	True	IndivQLearningParticleDNNOnlyOneHotMoreSeeds/228_5_28_slugs_centralized	slugs_centralized	shields/momentum_shield	0.05
IndivQLearningParticleDNNOnlyOneHotMoreSeeds/228_5_28	none		True	-10	False	ParticleMomentum	False	False	10	-30	Individual_Deep_Q	1.0	simple_mlp	True	0.05	2500000	38	True	IndivQLearningParticleDNNOnlyOneHotMoreSeeds/228_5_28_slugs_decentralized	slugs_decentralized	shields/momentum_shield	0.05
IndivQLearningParticleDNNOnlyOneHotMoreSeeds/228_5_28	none		True	-10	False	ParticleMomentum	False	False	10	-30	Individual_Deep_Q	1.0	simple_mlp	True	0.05	2500000	38	True	IndivQLearningParticleDNNOnlyOneHotMoreSeeds/228_5_28_none	none		0.05
IndivQLearningParticleDNNOnlyOneHotMoreSeeds/229_5_29	none		True	-10	False	ParticleMomentum	False	False	10	-30	Individual_Deep_Q	1.0	simple_mlp	True	0.05	2500000	39	True	IndivQLearningParticleDNNOnlyOneHotMoreSeeds/229_5_29_slugs_centralized	slugs_centralized	shields/momentum_shield	0.05
IndivQLearningParticleDNNOnlyOneHotMoreSeeds/229_5_29	none		True	-10	False	ParticleMomentum	False	False	10	-30	Individual_Deep_Q	1.0	simple_mlp	True	0.05	2500000	39	True	IndivQLearningParticleDNNOnlyOneHotMoreSeeds/229_5_29_slugs_decentralized	slugs_decentralized	shields/momentum_shield	0.05
IndivQLearningParticleDNNOnlyOneHotMoreSeeds/229_5_29	none		True	-10	False	ParticleMomentum	False	False	10	-30	Individual_Deep_Q	1.0	simple_mlp	True	0.05	2500000	39	True	IndivQLearningParticleDNNOnlyOneHotMoreSeeds/229_5_29_none	none		0.05
IndivQLearningParticleDNNOnlyOneHotMoreSeeds/230_5_30	none		True	-10	False	ParticleMomentum	False	False	10	-30	Individual_Deep_Q	1.0	simple_mlp	True	0.05	2500000	40	True	IndivQLearningParticleDNNOnlyOneHotMoreSeeds/230_5_30_slugs_centralized	slugs_centralized	shields/momentum_shield	0.05
IndivQLearningParticleDNNOnlyOneHotMoreSeeds/230_5_30	none		True	-10	False	ParticleMomentum	False	False	10	-30	Individual_Deep_Q	1.0	simple_mlp	True	0.05	2500000	40	True	IndivQLearningParticleDNNOnlyOneHotMoreSeeds/230_5_30_slugs_decentralized	slugs_decentralized	shields/momentum_shield	0.05
IndivQLearningParticleDNNOnlyOneHotMoreSeeds/230_5_30	none		True	-10	False	ParticleMomentum	False	False	10	-30	Individual_Deep_Q	1.0	simple_mlp	True	0.05	2500000	40	True	IndivQLearningParticleDNNOnlyOneHotMoreSeeds/230_5_30_none	none		0.05
IndivQLearningParticleDNNOnlyOneHotMoreSeeds/231_5_31	none		True	-10	False	ParticleMomentum	False	False	10	-30	Individual_Deep_Q	1.0	simple_mlp	True	0.05	2500000	41	True	IndivQLearningParticleDNNOnlyOneHotMoreSeeds/231_5_31_slugs_centralized	slugs_centralized	shields/momentum_shield	0.05
IndivQLearningParticleDNNOnlyOneHotMoreSeeds/231_5_31	none		True	-10	False	ParticleMomentum	False	False	10	-30	Individual_Deep_Q	1.0	simple_mlp	True	0.05	2500000	41	True	IndivQLearningParticleDNNOnlyOneHotMoreSeeds/231_5_31_slugs_decentralized	slugs_decentralized	shields/momentum_shield	0.05
IndivQLearningParticleDNNOnlyOneHotMoreSeeds/231_5_31	none		True	-10	False	ParticleMomentum	False	False	10	-30	Individual_Deep_Q	1.0	simple_mlp	True	0.05	2500000	41	True	IndivQLearningParticleDNNOnlyOneHotMoreSeeds/231_5_31_none	none		0.05
IndivQLearningParticleDNNOnlyOneHotMoreSeeds/232_5_32	none		True	-10	False	ParticleMomentum	False	False	10	-30	Individual_Deep_Q	1.0	simple_mlp	True	0.05	2500000	42	True	IndivQLearningParticleDNNOnlyOneHotMoreSeeds/232_5_32_slugs_centralized	slugs_centralized	shields/momentum_shield	0.05
IndivQLearningParticleDNNOnlyOneHotMoreSeeds/232_5_32	none		True	-10	False	ParticleMomentum	False	False	10	-30	Individual_Deep_Q	1.0	simple_mlp	True	0.05	2500000	42	True	IndivQLearningParticleDNNOnlyOneHotMoreSeeds/232_5_32_slugs_decentralized	slugs_decentralized	shields/momentum_shield	0.05
IndivQLearningParticleDNNOnlyOneHotMoreSeeds/232_5_32	none		True	-10	False	ParticleMomentum	False	False	10	-30	Individual_Deep_Q	1.0	simple_mlp	True	0.05	2500000	42	True	IndivQLearningParticleDNNOnlyOneHotMoreSeeds/232_5_32_none	none		0.05
IndivQLearningParticleDNNOnlyOneHotMoreSeeds/233_5_33	none		True	-10	False	ParticleMomentum	False	False	10	-30	Individual_Deep_Q	1.0	simple_mlp	True	0.05	2500000	43	True	IndivQLearningParticleDNNOnlyOneHotMoreSeeds/233_5_33_slugs_centralized	slugs_centralized	shields/momentum_shield	0.05
IndivQLearningParticleDNNOnlyOneHotMoreSeeds/233_5_33	none		True	-10	False	ParticleMomentum	False	False	10	-30	Individual_Deep_Q	1.0	simple_mlp	True	0.05	2500000	43	True	IndivQLearningParticleDNNOnlyOneHotMoreSeeds/233_5_33_slugs_decentralized	slugs_decentralized	shields/momentum_shield	0.05
IndivQLearningParticleDNNOnlyOneHotMoreSeeds/233_5_33	none		True	-10	False	ParticleMomentum	False	False	10	-30	Individual_Deep_Q	1.0	simple_mlp	True	0.05	2500000	43	True	IndivQLearningParticleDNNOnlyOneHotMoreSeeds/233_5_33_none	none		0.05
IndivQLearningParticleDNNOnlyOneHotMoreSeeds/234_5_34	none		True	-10	False	ParticleMomentum	False	False	10	-30	Individual_Deep_Q	1.0	simple_mlp	True	0.05	2500000	44	True	IndivQLearningParticleDNNOnlyOneHotMoreSeeds/234_5_34_slugs_centralized	slugs_centralized	shields/momentum_shield	0.05
IndivQLearningParticleDNNOnlyOneHotMoreSeeds/234_5_34	none		True	-10	False	ParticleMomentum	False	False	10	-30	Individual_Deep_Q	1.0	simple_mlp	True	0.05	2500000	44	True	IndivQLearningParticleDNNOnlyOneHotMoreSeeds/234_5_34_slugs_decentralized	slugs_decentralized	shields/momentum_shield	0.05
IndivQLearningParticleDNNOnlyOneHotMoreSeeds/234_5_34	none		True	-10	False	ParticleMomentum	False	False	10	-30	Individual_Deep_Q	1.0	simple_mlp	True	0.05	2500000	44	True	IndivQLearningParticleDNNOnlyOneHotMoreSeeds/234_5_34_none	none		0.05
IndivQLearningParticleDNNOnlyOneHotMoreSeeds/235_5_35	none		True	-10	False	ParticleMomentum	False	False	10	-30	Individual_Deep_Q	1.0	simple_mlp	True	0.05	2500000	45	True	IndivQLearningParticleDNNOnlyOneHotMoreSeeds/235_5_35_slugs_centralized	slugs_centralized	shields/momentum_shield	0.05
IndivQLearningParticleDNNOnlyOneHotMoreSeeds/235_5_35	none		True	-10	False	ParticleMomentum	False	False	10	-30	Individual_Deep_Q	1.0	simple_mlp	True	0.05	2500000	45	True	IndivQLearningParticleDNNOnlyOneHotMoreSeeds/235_5_35_slugs_decentralized	slugs_decentralized	shields/momentum_shield	0.05
IndivQLearningParticleDNNOnlyOneHotMoreSeeds/235_5_35	none		True	-10	False	ParticleMomentum	False	False	10	-30	Individual_Deep_Q	1.0	simple_mlp	True	0.05	2500000	45	True	IndivQLearningParticleDNNOnlyOneHotMoreSeeds/235_5_35_none	none		0.05
IndivQLearningParticleDNNOnlyOneHotMoreSeeds/236_5_36	none		True	-10	False	ParticleMomentum	False	False	10	-30	Individual_Deep_Q	1.0	simple_mlp	True	0.05	2500000	46	True	IndivQLearningParticleDNNOnlyOneHotMoreSeeds/236_5_36_slugs_centralized	slugs_centralized	shields/momentum_shield	0.05
IndivQLearningParticleDNNOnlyOneHotMoreSeeds/236_5_36	none		True	-10	False	ParticleMomentum	False	False	10	-30	Individual_Deep_Q	1.0	simple_mlp	True	0.05	2500000	46	True	IndivQLearningParticleDNNOnlyOneHotMoreSeeds/236_5_36_slugs_decentralized	slugs_decentralized	shields/momentum_shield	0.05
IndivQLearningParticleDNNOnlyOneHotMoreSeeds/236_5_36	none		True	-10	False	ParticleMomentum	False	False	10	-30	Individual_Deep_Q	1.0	simple_mlp	True	0.05	2500000	46	True	IndivQLearningParticleDNNOnlyOneHotMoreSeeds/236_5_36_none	none		0.05
IndivQLearningParticleDNNOnlyOneHotMoreSeeds/237_5_37	none		True	-10	False	ParticleMomentum	False	False	10	-30	Individual_Deep_Q	1.0	simple_mlp	True	0.05	2500000	47	True	IndivQLearningParticleDNNOnlyOneHotMoreSeeds/237_5_37_slugs_centralized	slugs_centralized	shields/momentum_shield	0.05
IndivQLearningParticleDNNOnlyOneHotMoreSeeds/237_5_37	none		True	-10	False	ParticleMomentum	False	False	10	-30	Individual_Deep_Q	1.0	simple_mlp	True	0.05	2500000	47	True	IndivQLearningParticleDNNOnlyOneHotMoreSeeds/237_5_37_slugs_decentralized	slugs_decentralized	shields/momentum_shield	0.05
IndivQLearningParticleDNNOnlyOneHotMoreSeeds/237_5_37	none		True	-10	False	ParticleMomentum	False	False	10	-30	Individual_Deep_Q	1.0	simple_mlp	True	0.05	2500000	47	True	IndivQLearningParticleDNNOnlyOneHotMoreSeeds/237_5_37_none	none		0.05
IndivQLearningParticleDNNOnlyOneHotMoreSeeds/238_5_38	none		True	-10	False	ParticleMomentum	False	False	10	-30	Individual_Deep_Q	1.0	simple_mlp	True	0.05	2500000	48	True	IndivQLearningParticleDNNOnlyOneHotMoreSeeds/238_5_38_slugs_centralized	slugs_centralized	shields/momentum_shield	0.05
IndivQLearningParticleDNNOnlyOneHotMoreSeeds/238_5_38	none		True	-10	False	ParticleMomentum	False	False	10	-30	Individual_Deep_Q	1.0	simple_mlp	True	0.05	2500000	48	True	IndivQLearningParticleDNNOnlyOneHotMoreSeeds/238_5_38_slugs_decentralized	slugs_decentralized	shields/momentum_shield	0.05
IndivQLearningParticleDNNOnlyOneHotMoreSeeds/238_5_38	none		True	-10	False	ParticleMomentum	False	False	10	-30	Individual_Deep_Q	1.0	simple_mlp	True	0.05	2500000	48	True	IndivQLearningParticleDNNOnlyOneHotMoreSeeds/238_5_38_none	none		0.05
IndivQLearningParticleDNNOnlyOneHotMoreSeeds/239_5_39	none		True	-10	False	ParticleMomentum	False	False	10	-30	Individual_Deep_Q	1.0	simple_mlp	True	0.05	2500000	49	True	IndivQLearningParticleDNNOnlyOneHotMoreSeeds/239_5_39_slugs_centralized	slugs_centralized	shields/momentum_shield	0.05
IndivQLearningParticleDNNOnlyOneHotMoreSeeds/239_5_39	none		True	-10	False	ParticleMomentum	False	False	10	-30	Individual_Deep_Q	1.0	simple_mlp	True	0.05	2500000	49	True	IndivQLearningParticleDNNOnlyOneHotMoreSeeds/239_5_39_slugs_decentralized	slugs_decentralized	shields/momentum_shield	0.05
IndivQLearningParticleDNNOnlyOneHotMoreSeeds/239_5_39	none		True	-10	False	ParticleMomentum	False	False	10	-30	Individual_Deep_Q	1.0	simple_mlp	True	0.05	2500000	49	True	IndivQLearningParticleDNNOnlyOneHotMoreSeeds/239_5_39_none	none		0.05
