# Supplementary material
Source: ML conference proceedings conference paper supplement (https://proceedings.neurips.cc/paper_files/paper/2022/hash/57444e14ecd9e2c8f603b4f012ce3811-Abstract.html)
Supplement: Supplementary file 1 [file 57444e14ecd9e2c8f603b4f012ce3811-Supplemental-Conference.zip › 3410_shield_decentralization_for_sa-Supplementary Material/parallel_configs/IndivQLearningParticleDNNOnlyOneHotTrain.csv]

run_name	shield	shield_specification	punish_unsafe_orig_action	punish_unsafe_orig_action_modifier	randomize_starts	map_type	particle_agents_observe_momentum	particle_terminate_on_collision	particle_world_size	particle_collision_penalty	learner_type	learner_anneal_eps_start	learner_deep_network_model	learner_transform_one_hot	learner_anneal_eps_finish	max_total_steps	seed	skip_evaluation
IndivQLearningParticleDNNOnlyOneHot/0_0_0	slugs_centralized	shields/momentum_shield	True	-10	True	ParticleMomentum	True	False	10	-30	Individual_Deep_Q	1.0	simple_mlp	True	0.05	2500000	0	True
IndivQLearningParticleDNNOnlyOneHot/1_0_1	slugs_centralized	shields/momentum_shield	True	-10	True	ParticleMomentum	True	False	10	-30	Individual_Deep_Q	1.0	simple_mlp	True	0.05	2500000	1	True
IndivQLearningParticleDNNOnlyOneHot/2_0_2	slugs_centralized	shields/momentum_shield	True	-10	True	ParticleMomentum	True	False	10	-30	Individual_Deep_Q	1.0	simple_mlp	True	0.05	2500000	2	True
IndivQLearningParticleDNNOnlyOneHot/3_0_3	slugs_centralized	shields/momentum_shield	True	-10	True	ParticleMomentum	True	False	10	-30	Individual_Deep_Q	1.0	simple_mlp	True	0.05	2500000	3	True
IndivQLearningParticleDNNOnlyOneHot/4_0_4	slugs_centralized	shields/momentum_shield	True	-10	True	ParticleMomentum	True	False	10	-30	Individual_Deep_Q	1.0	simple_mlp	True	0.05	2500000	4	True
IndivQLearningParticleDNNOnlyOneHot/5_0_5	slugs_centralized	shields/momentum_shield	True	-10	True	ParticleMomentum	True	False	10	-30	Individual_Deep_Q	1.0	simple_mlp	True	0.05	2500000	5	True
IndivQLearningParticleDNNOnlyOneHot/6_0_6	slugs_centralized	shields/momentum_shield	True	-10	True	ParticleMomentum	True	False	10	-30	Individual_Deep_Q	1.0	simple_mlp	True	0.05	2500000	6	True
IndivQLearningParticleDNNOnlyOneHot/7_0_7	slugs_centralized	shields/momentum_shield	True	-10	True	ParticleMomentum	True	False	10	-30	Individual_Deep_Q	1.0	simple_mlp	True	0.05	2500000	7	True
IndivQLearningParticleDNNOnlyOneHot/8_0_8	slugs_centralized	shields/momentum_shield	True	-10	True	ParticleMomentum	True	False	10	-30	Individual_Deep_Q	1.0	simple_mlp	True	0.05	2500000	8	True
IndivQLearningParticleDNNOnlyOneHot/9_0_9	slugs_centralized	shields/momentum_shield	True	-10	True	ParticleMomentum	True	False	10	-30	Individual_Deep_Q	1.0	simple_mlp	True	0.05	2500000	9	True
IndivQLearningParticleDNNOnlyOneHot/10_1_0	slugs_centralized	shields/momentum_shield	True	-10	True	ParticleMomentum	False	False	10	-30	Individual_Deep_Q	1.0	simple_mlp	True	0.05	2500000	0	True
IndivQLearningParticleDNNOnlyOneHot/11_1_1	slugs_centralized	shields/momentum_shield	True	-10	True	ParticleMomentum	False	False	10	-30	Individual_Deep_Q	1.0	simple_mlp	True	0.05	2500000	1	True
IndivQLearningParticleDNNOnlyOneHot/12_1_2	slugs_centralized	shields/momentum_shield	True	-10	True	ParticleMomentum	False	False	10	-30	Individual_Deep_Q	1.0	simple_mlp	True	0.05	2500000	2	True
IndivQLearningParticleDNNOnlyOneHot/13_1_3	slugs_centralized	shields/momentum_shield	True	-10	True	ParticleMomentum	False	False	10	-30	Individual_Deep_Q	1.0	simple_mlp	True	0.05	2500000	3	True
IndivQLearningParticleDNNOnlyOneHot/14_1_4	slugs_centralized	shields/momentum_shield	True	-10	True	ParticleMomentum	False	False	10	-30	Individual_Deep_Q	1.0	simple_mlp	True	0.05	2500000	4	True
IndivQLearningParticleDNNOnlyOneHot/15_1_5	slugs_centralized	shields/momentum_shield	True	-10	True	ParticleMomentum	False	False	10	-30	Individual_Deep_Q	1.0	simple_mlp	True	0.05	2500000	5	True
IndivQLearningParticleDNNOnlyOneHot/16_1_6	slugs_centralized	shields/momentum_shield	True	-10	True	ParticleMomentum	False	False	10	-30	Individual_Deep_Q	1.0	simple_mlp	True	0.05	2500000	6	True
IndivQLearningParticleDNNOnlyOneHot/17_1_7	slugs_centralized	shields/momentum_shield	True	-10	True	ParticleMomentum	False	False	10	-30	Individual_Deep_Q	1.0	simple_mlp	True	0.05	2500000	7	True
IndivQLearningParticleDNNOnlyOneHot/18_1_8	slugs_centralized	shields/momentum_shield	True	-10	True	ParticleMomentum	False	False	10	-30	Individual_Deep_Q	1.0	simple_mlp	True	0.05	2500000	8	True
IndivQLearningParticleDNNOnlyOneHot/19_1_9	slugs_centralized	shields/momentum_shield	True	-10	True	ParticleMomentum	False	False	10	-30	Individual_Deep_Q	1.0	simple_mlp	True	0.05	2500000	9	True
IndivQLearningParticleDNNOnlyOneHot/20_2_0	slugs_decentralized	shields/momentum_shield	True	-10	True	ParticleMomentum	True	False	10	-30	Individual_Deep_Q	1.0	simple_mlp	True	0.05	2500000	0	True
IndivQLearningParticleDNNOnlyOneHot/21_2_1	slugs_decentralized	shields/momentum_shield	True	-10	True	ParticleMomentum	True	False	10	-30	Individual_Deep_Q	1.0	simple_mlp	True	0.05	2500000	1	True
IndivQLearningParticleDNNOnlyOneHot/22_2_2	slugs_decentralized	shields/momentum_shield	True	-10	True	ParticleMomentum	True	False	10	-30	Individual_Deep_Q	1.0	simple_mlp	True	0.05	2500000	2	True
IndivQLearningParticleDNNOnlyOneHot/23_2_3	slugs_decentralized	shields/momentum_shield	True	-10	True	ParticleMomentum	True	False	10	-30	Individual_Deep_Q	1.0	simple_mlp	True	0.05	2500000	3	True
IndivQLearningParticleDNNOnlyOneHot/24_2_4	slugs_decentralized	shields/momentum_shield	True	-10	True	ParticleMomentum	True	False	10	-30	Individual_Deep_Q	1.0	simple_mlp	True	0.05	2500000	4	True
IndivQLearningParticleDNNOnlyOneHot/25_2_5	slugs_decentralized	shields/momentum_shield	True	-10	True	ParticleMomentum	True	False	10	-30	Individual_Deep_Q	1.0	simple_mlp	True	0.05	2500000	5	True
IndivQLearningParticleDNNOnlyOneHot/26_2_6	slugs_decentralized	shields/momentum_shield	True	-10	True	ParticleMomentum	True	False	10	-30	Individual_Deep_Q	1.0	simple_mlp	True	0.05	2500000	6	True
IndivQLearningParticleDNNOnlyOneHot/27_2_7	slugs_decentralized	shields/momentum_shield	True	-10	True	ParticleMomentum	True	False	10	-30	Individual_Deep_Q	1.0	simple_mlp	True	0.05	2500000	7	True
IndivQLearningParticleDNNOnlyOneHot/28_2_8	slugs_decentralized	shields/momentum_shield	True	-10	True	ParticleMomentum	True	False	10	-30	Individual_Deep_Q	1.0	simple_mlp	True	0.05	2500000	8	True
IndivQLearningParticleDNNOnlyOneHot/29_2_9	slugs_decentralized	shields/momentum_shield	True	-10	True	ParticleMomentum	True	False	10	-30	Individual_Deep_Q	1.0	simple_mlp	True	0.05	2500000	9	True
IndivQLearningParticleDNNOnlyOneHot/30_3_0	slugs_decentralized	shields/momentum_shield	True	-10	True	ParticleMomentum	False	False	10	-30	Individual_Deep_Q	1.0	simple_mlp	True	0.05	2500000	0	True
IndivQLearningParticleDNNOnlyOneHot/31_3_1	slugs_decentralized	shields/momentum_shield	True	-10	True	ParticleMomentum	False	False	10	-30	Individual_Deep_Q	1.0	simple_mlp	True	0.05	2500000	1	True
IndivQLearningParticleDNNOnlyOneHot/32_3_2	slugs_decentralized	shields/momentum_shield	True	-10	True	ParticleMomentum	False	False	10	-30	Individual_Deep_Q	1.0	simple_mlp	True	0.05	2500000	2	True
IndivQLearningParticleDNNOnlyOneHot/33_3_3	slugs_decentralized	shields/momentum_shield	True	-10	True	ParticleMomentum	False	False	10	-30	Individual_Deep_Q	1.0	simple_mlp	True	0.05	2500000	3	True
IndivQLearningParticleDNNOnlyOneHot/34_3_4	slugs_decentralized	shields/momentum_shield	True	-10	True	ParticleMomentum	False	False	10	-30	Individual_Deep_Q	1.0	simple_mlp	True	0.05	2500000	4	True
IndivQLearningParticleDNNOnlyOneHot/35_3_5	slugs_decentralized	shields/momentum_shield	True	-10	True	ParticleMomentum	False	False	10	-30	Individual_Deep_Q	1.0	simple_mlp	True	0.05	2500000	5	True
IndivQLearningParticleDNNOnlyOneHot/36_3_6	slugs_decentralized	shields/momentum_shield	True	-10	True	ParticleMomentum	False	False	10	-30	Individual_Deep_Q	1.0	simple_mlp	True	0.05	2500000	6	True
IndivQLearningParticleDNNOnlyOneHot/37_3_7	slugs_decentralized	shields/momentum_shield	True	-10	True	ParticleMomentum	False	False	10	-30	Individual_Deep_Q	1.0	simple_mlp	True	0.05	2500000	7	True
IndivQLearningParticleDNNOnlyOneHot/38_3_8	slugs_decentralized	shields/momentum_shield	True	-10	True	ParticleMomentum	False	False	10	-30	Individual_Deep_Q	1.0	simple_mlp	True	0.05	2500000	8	True
IndivQLearningParticleDNNOnlyOneHot/39_3_9	slugs_decentralized	shields/momentum_shield	True	-10	True	ParticleMomentum	False	False	10	-30	Individual_Deep_Q	1.0	simple_mlp	True	0.05	2500000	9	True
IndivQLearningParticleDNNOnlyOneHot/40_4_0	none		True	-10	True	ParticleMomentum	True	False	10	-30	Individual_Deep_Q	1.0	simple_mlp	True	0.05	2500000	0	True
IndivQLearningParticleDNNOnlyOneHot/41_4_1	none		True	-10	True	ParticleMomentum	True	False	10	-30	Individual_Deep_Q	1.0	simple_mlp	True	0.05	2500000	1	True
IndivQLearningParticleDNNOnlyOneHot/42_4_2	none		True	-10	True	ParticleMomentum	True	False	10	-30	Individual_Deep_Q	1.0	simple_mlp	True	0.05	2500000	2	True
IndivQLearningParticleDNNOnlyOneHot/43_4_3	none		True	-10	True	ParticleMomentum	True	False	10	-30	Individual_Deep_Q	1.0	simple_mlp	True	0.05	2500000	3	True
IndivQLearningParticleDNNOnlyOneHot/44_4_4	none		True	-10	True	ParticleMomentum	True	False	10	-30	Individual_Deep_Q	1.0	simple_mlp	True	0.05	2500000	4	True
IndivQLearningParticleDNNOnlyOneHot/45_4_5	none		True	-10	True	ParticleMomentum	True	False	10	-30	Individual_Deep_Q	1.0	simple_mlp	True	0.05	2500000	5	True
IndivQLearningParticleDNNOnlyOneHot/46_4_6	none		True	-10	True	ParticleMomentum	True	False	10	-30	Individual_Deep_Q	1.0	simple_mlp	True	0.05	2500000	6	True
IndivQLearningParticleDNNOnlyOneHot/47_4_7	none		True	-10	True	ParticleMomentum	True	False	10	-30	Individual_Deep_Q	1.0	simple_mlp	True	0.05	2500000	7	True
IndivQLearningParticleDNNOnlyOneHot/48_4_8	none		True	-10	True	ParticleMomentum	True	False	10	-30	Individual_Deep_Q	1.0	simple_mlp	True	0.05	2500000	8	True
IndivQLearningParticleDNNOnlyOneHot/49_4_9	none		True	-10	True	ParticleMomentum	True	False	10	-30	Individual_Deep_Q	1.0	simple_mlp	True	0.05	2500000	9	True
IndivQLearningParticleDNNOnlyOneHot/50_5_0	none		True	-10	True	ParticleMomentum	False	False	10	-30	Individual_Deep_Q	1.0	simple_mlp	True	0.05	2500000	0	True
IndivQLearningParticleDNNOnlyOneHot/51_5_1	none		True	-10	True	ParticleMomentum	False	False	10	-30	Individual_Deep_Q	1.0	simple_mlp	True	0.05	2500000	1	True
IndivQLearningParticleDNNOnlyOneHot/52_5_2	none		True	-10	True	ParticleMomentum	False	False	10	-30	Individual_Deep_Q	1.0	simple_mlp	True	0.05	2500000	2	True
IndivQLearningParticleDNNOnlyOneHot/53_5_3	none		True	-10	True	ParticleMomentum	False	False	10	-30	Individual_Deep_Q	1.0	simple_mlp	True	0.05	2500000	3	True
IndivQLearningParticleDNNOnlyOneHot/54_5_4	none		True	-10	True	ParticleMomentum	False	False	10	-30	Individual_Deep_Q	1.0	simple_mlp	True	0.05	2500000	4	True
IndivQLearningParticleDNNOnlyOneHot/55_5_5	none		True	-10	True	ParticleMomentum	False	False	10	-30	Individual_Deep_Q	1.0	simple_mlp	True	0.05	2500000	5	True
IndivQLearningParticleDNNOnlyOneHot/56_5_6	none		True	-10	True	ParticleMomentum	False	False	10	-30	Individual_Deep_Q	1.0	simple_mlp	True	0.05	2500000	6	True
IndivQLearningParticleDNNOnlyOneHot/57_5_7	none		True	-10	True	ParticleMomentum	False	False	10	-30	Individual_Deep_Q	1.0	simple_mlp	True	0.05	2500000	7	True
IndivQLearningParticleDNNOnlyOneHot/58_5_8	none		True	-10	True	ParticleMomentum	False	False	10	-30	Individual_Deep_Q	1.0	simple_mlp	True	0.05	2500000	8	True
IndivQLearningParticleDNNOnlyOneHot/59_5_9	none		True	-10	True	ParticleMomentum	False	False	10	-30	Individual_Deep_Q	1.0	simple_mlp	True	0.05	2500000	9	True
IndivQLearningParticleDNNOnlyOneHot/60_6_0	slugs_centralized	shields/momentum_shield	True	-10	False	ParticleMomentum	True	False	10	-30	Individual_Deep_Q	1.0	simple_mlp	True	0.05	2500000	0	True
IndivQLearningParticleDNNOnlyOneHot/61_6_1	slugs_centralized	shields/momentum_shield	True	-10	False	ParticleMomentum	True	False	10	-30	Individual_Deep_Q	1.0	simple_mlp	True	0.05	2500000	1	True
IndivQLearningParticleDNNOnlyOneHot/62_6_2	slugs_centralized	shields/momentum_shield	True	-10	False	ParticleMomentum	True	False	10	-30	Individual_Deep_Q	1.0	simple_mlp	True	0.05	2500000	2	True
IndivQLearningParticleDNNOnlyOneHot/63_6_3	slugs_centralized	shields/momentum_shield	True	-10	False	ParticleMomentum	True	False	10	-30	Individual_Deep_Q	1.0	simple_mlp	True	0.05	2500000	3	True
IndivQLearningParticleDNNOnlyOneHot/64_6_4	slugs_centralized	shields/momentum_shield	True	-10	False	ParticleMomentum	True	False	10	-30	Individual_Deep_Q	1.0	simple_mlp	True	0.05	2500000	4	True
IndivQLearningParticleDNNOnlyOneHot/65_6_5	slugs_centralized	shields/momentum_shield	True	-10	False	ParticleMomentum	True	False	10	-30	Individual_Deep_Q	1.0	simple_mlp	True	0.05	2500000	5	True
IndivQLearningParticleDNNOnlyOneHot/66_6_6	slugs_centralized	shields/momentum_shield	True	-10	False	ParticleMomentum	True	False	10	-30	Individual_Deep_Q	1.0	simple_mlp	True	0.05	2500000	6	True
IndivQLearningParticleDNNOnlyOneHot/67_6_7	slugs_centralized	shields/momentum_shield	True	-10	False	ParticleMomentum	True	False	10	-30	Individual_Deep_Q	1.0	simple_mlp	True	0.05	2500000	7	True
IndivQLearningParticleDNNOnlyOneHot/68_6_8	slugs_centralized	shields/momentum_shield	True	-10	False	ParticleMomentum	True	False	10	-30	Individual_Deep_Q	1.0	simple_mlp	True	0.05	2500000	8	True
IndivQLearningParticleDNNOnlyOneHot/69_6_9	slugs_centralized	shields/momentum_shield	True	-10	False	ParticleMomentum	True	False	10	-30	Individual_Deep_Q	1.0	simple_mlp	True	0.05	2500000	9	True
IndivQLearningParticleDNNOnlyOneHot/70_7_0	slugs_centralized	shields/momentum_shield	True	-10	False	ParticleMomentum	False	False	10	-30	Individual_Deep_Q	1.0	simple_mlp	True	0.05	2500000	0	True
IndivQLearningParticleDNNOnlyOneHot/71_7_1	slugs_centralized	shields/momentum_shield	True	-10	False	ParticleMomentum	False	False	10	-30	Individual_Deep_Q	1.0	simple_mlp	True	0.05	2500000	1	True
IndivQLearningParticleDNNOnlyOneHot/72_7_2	slugs_centralized	shields/momentum_shield	True	-10	False	ParticleMomentum	False	False	10	-30	Individual_Deep_Q	1.0	simple_mlp	True	0.05	2500000	2	True
IndivQLearningParticleDNNOnlyOneHot/73_7_3	slugs_centralized	shields/momentum_shield	True	-10	False	ParticleMomentum	False	False	10	-30	Individual_Deep_Q	1.0	simple_mlp	True	0.05	2500000	3	True
IndivQLearningParticleDNNOnlyOneHot/74_7_4	slugs_centralized	shields/momentum_shield	True	-10	False	ParticleMomentum	False	False	10	-30	Individual_Deep_Q	1.0	simple_mlp	True	0.05	2500000	4	True
IndivQLearningParticleDNNOnlyOneHot/75_7_5	slugs_centralized	shields/momentum_shield	True	-10	False	ParticleMomentum	False	False	10	-30	Individual_Deep_Q	1.0	simple_mlp	True	0.05	2500000	5	True
IndivQLearningParticleDNNOnlyOneHot/76_7_6	slugs_centralized	shields/momentum_shield	True	-10	False	ParticleMomentum	False	False	10	-30	Individual_Deep_Q	1.0	simple_mlp	True	0.05	2500000	6	True
IndivQLearningParticleDNNOnlyOneHot/77_7_7	slugs_centralized	shields/momentum_shield	True	-10	False	ParticleMomentum	False	False	10	-30	Individual_Deep_Q	1.0	simple_mlp	True	0.05	2500000	7	True
IndivQLearningParticleDNNOnlyOneHot/78_7_8	slugs_centralized	shields/momentum_shield	True	-10	False	ParticleMomentum	False	False	10	-30	Individual_Deep_Q	1.0	simple_mlp	True	0.05	2500000	8	True
IndivQLearningParticleDNNOnlyOneHot/79_7_9	slugs_centralized	shields/momentum_shield	True	-10	False	ParticleMomentum	False	False	10	-30	Individual_Deep_Q	1.0	simple_mlp	True	0.05	2500000	9	True
IndivQLearningParticleDNNOnlyOneHot/80_8_0	slugs_decentralized	shields/momentum_shield	True	-10	False	ParticleMomentum	True	False	10	-30	Individual_Deep_Q	1.0	simple_mlp	True	0.05	2500000	0	True
IndivQLearningParticleDNNOnlyOneHot/81_8_1	slugs_decentralized	shields/momentum_shield	True	-10	False	ParticleMomentum	True	False	10	-30	Individual_Deep_Q	1.0	simple_mlp	True	0.05	2500000	1	True
IndivQLearningParticleDNNOnlyOneHot/82_8_2	slugs_decentralized	shields/momentum_shield	True	-10	False	ParticleMomentum	True	False	10	-30	Individual_Deep_Q	1.0	simple_mlp	True	0.05	2500000	2	True
IndivQLearningParticleDNNOnlyOneHot/83_8_3	slugs_decentralized	shields/momentum_shield	True	-10	False	ParticleMomentum	True	False	10	-30	Individual_Deep_Q	1.0	simple_mlp	True	0.05	2500000	3	True
IndivQLearningParticleDNNOnlyOneHot/84_8_4	slugs_decentralized	shields/momentum_shield	True	-10	False	ParticleMomentum	True	False	10	-30	Individual_Deep_Q	1.0	simple_mlp	True	0.05	2500000	4	True
IndivQLearningParticleDNNOnlyOneHot/85_8_5	slugs_decentralized	shields/momentum_shield	True	-10	False	ParticleMomentum	True	False	10	-30	Individual_Deep_Q	1.0	simple_mlp	True	0.05	2500000	5	True
IndivQLearningParticleDNNOnlyOneHot/86_8_6	slugs_decentralized	shields/momentum_shield	True	-10	False	ParticleMomentum	True	False	10	-30	Individual_Deep_Q	1.0	simple_mlp	True	0.05	2500000	6	True
IndivQLearningParticleDNNOnlyOneHot/87_8_7	slugs_decentralized	shields/momentum_shield	True	-10	False	ParticleMomentum	True	False	10	-30	Individual_Deep_Q	1.0	simple_mlp	True	0.05	2500000	7	True
IndivQLearningParticleDNNOnlyOneHot/88_8_8	slugs_decentralized	shields/momentum_shield	True	-10	False	ParticleMomentum	True	False	10	-30	Individual_Deep_Q	1.0	simple_mlp	True	0.05	2500000	8	True
IndivQLearningParticleDNNOnlyOneHot/89_8_9	slugs_decentralized	shields/momentum_shield	True	-10	False	ParticleMomentum	True	False	10	-30	Individual_Deep_Q	1.0	simple_mlp	True	0.05	2500000	9	True
IndivQLearningParticleDNNOnlyOneHot/90_9_0	slugs_decentralized	shields/momentum_shield	True	-10	False	ParticleMomentum	False	False	10	-30	Individual_Deep_Q	1.0	simple_mlp	True	0.05	2500000	0	True
IndivQLearningParticleDNNOnlyOneHot/91_9_1	slugs_decentralized	shields/momentum_shield	True	-10	False	ParticleMomentum	False	False	10	-30	Individual_Deep_Q	1.0	simple_mlp	True	0.05	2500000	1	True
IndivQLearningParticleDNNOnlyOneHot/92_9_2	slugs_decentralized	shields/momentum_shield	True	-10	False	ParticleMomentum	False	False	10	-30	Individual_Deep_Q	1.0	simple_mlp	True	0.05	2500000	2	True
IndivQLearningParticleDNNOnlyOneHot/93_9_3	slugs_decentralized	shields/momentum_shield	True	-10	False	ParticleMomentum	False	False	10	-30	Individual_Deep_Q	1.0	simple_mlp	True	0.05	2500000	3	True
IndivQLearningParticleDNNOnlyOneHot/94_9_4	slugs_decentralized	shields/momentum_shield	True	-10	False	ParticleMomentum	False	False	10	-30	Individual_Deep_Q	1.0	simple_mlp	True	0.05	2500000	4	True
IndivQLearningParticleDNNOnlyOneHot/95_9_5	slugs_decentralized	shields/momentum_shield	True	-10	False	ParticleMomentum	False	False	10	-30	Individual_Deep_Q	1.0	simple_mlp	True	0.05	2500000	5	True
IndivQLearningParticleDNNOnlyOneHot/96_9_6	slugs_decentralized	shields/momentum_shield	True	-10	False	ParticleMomentum	False	False	10	-30	Individual_Deep_Q	1.0	simple_mlp	True	0.05	2500000	6	True
IndivQLearningParticleDNNOnlyOneHot/97_9_7	slugs_decentralized	shields/momentum_shield	True	-10	False	ParticleMomentum	False	False	10	-30	Individual_Deep_Q	1.0	simple_mlp	True	0.05	2500000	7	True
IndivQLearningParticleDNNOnlyOneHot/98_9_8	slugs_decentralized	shields/momentum_shield	True	-10	False	ParticleMomentum	False	False	10	-30	Individual_Deep_Q	1.0	simple_mlp	True	0.05	2500000	8	True
IndivQLearningParticleDNNOnlyOneHot/99_9_9	slugs_decentralized	shields/momentum_shield	True	-10	False	ParticleMomentum	False	False	10	-30	Individual_Deep_Q	1.0	simple_mlp	True	0.05	2500000	9	True
IndivQLearningParticleDNNOnlyOneHot/100_10_0	none		True	-10	False	ParticleMomentum	True	False	10	-30	Individual_Deep_Q	1.0	simple_mlp	True	0.05	2500000	0	True
IndivQLearningParticleDNNOnlyOneHot/101_10_1	none		True	-10	False	ParticleMomentum	True	False	10	-30	Individual_Deep_Q	1.0	simple_mlp	True	0.05	2500000	1	True
IndivQLearningParticleDNNOnlyOneHot/102_10_2	none		True	-10	False	ParticleMomentum	True	False	10	-30	Individual_Deep_Q	1.0	simple_mlp	True	0.05	2500000	2	True
IndivQLearningParticleDNNOnlyOneHot/103_10_3	none		True	-10	False	ParticleMomentum	True	False	10	-30	Individual_Deep_Q	1.0	simple_mlp	True	0.05	2500000	3	True
IndivQLearningParticleDNNOnlyOneHot/104_10_4	none		True	-10	False	ParticleMomentum	True	False	10	-30	Individual_Deep_Q	1.0	simple_mlp	True	0.05	2500000	4	True
IndivQLearningParticleDNNOnlyOneHot/105_10_5	none		True	-10	False	ParticleMomentum	True	False	10	-30	Individual_Deep_Q	1.0	simple_mlp	True	0.05	2500000	5	True
IndivQLearningParticleDNNOnlyOneHot/106_10_6	none		True	-10	False	ParticleMomentum	True	False	10	-30	Individual_Deep_Q	1.0	simple_mlp	True	0.05	2500000	6	True
IndivQLearningParticleDNNOnlyOneHot/107_10_7	none		True	-10	False	ParticleMomentum	True	False	10	-30	Individual_Deep_Q	1.0	simple_mlp	True	0.05	2500000	7	True
IndivQLearningParticleDNNOnlyOneHot/108_10_8	none		True	-10	False	ParticleMomentum	True	False	10	-30	Individual_Deep_Q	1.0	simple_mlp	True	0.05	2500000	8	True
IndivQLearningParticleDNNOnlyOneHot/109_10_9	none		True	-10	False	ParticleMomentum	True	False	10	-30	Individual_Deep_Q	1.0	simple_mlp	True	0.05	2500000	9	True
IndivQLearningParticleDNNOnlyOneHot/110_11_0	none		True	-10	False	ParticleMomentum	False	False	10	-30	Individual_Deep_Q	1.0	simple_mlp	True	0.05	2500000	0	True
IndivQLearningParticleDNNOnlyOneHot/111_11_1	none		True	-10	False	ParticleMomentum	False	False	10	-30	Individual_Deep_Q	1.0	simple_mlp	True	0.05	2500000	1	True
IndivQLearningParticleDNNOnlyOneHot/112_11_2	none		True	-10	False	ParticleMomentum	False	False	10	-30	Individual_Deep_Q	1.0	simple_mlp	True	0.05	2500000	2	True
IndivQLearningParticleDNNOnlyOneHot/113_11_3	none		True	-10	False	ParticleMomentum	False	False	10	-30	Individual_Deep_Q	1.0	simple_mlp	True	0.05	2500000	3	True
IndivQLearningParticleDNNOnlyOneHot/114_11_4	none		True	-10	False	ParticleMomentum	False	False	10	-30	Individual_Deep_Q	1.0	simple_mlp	True	0.05	2500000	4	True
IndivQLearningParticleDNNOnlyOneHot/115_11_5	none		True	-10	False	ParticleMomentum	False	False	10	-30	Individual_Deep_Q	1.0	simple_mlp	True	0.05	2500000	5	True
IndivQLearningParticleDNNOnlyOneHot/116_11_6	none		True	-10	False	ParticleMomentum	False	False	10	-30	Individual_Deep_Q	1.0	simple_mlp	True	0.05	2500000	6	True
IndivQLearningParticleDNNOnlyOneHot/117_11_7	none		True	-10	False	ParticleMomentum	False	False	10	-30	Individual_Deep_Q	1.0	simple_mlp	True	0.05	2500000	7	True
IndivQLearningParticleDNNOnlyOneHot/118_11_8	none		True	-10	False	ParticleMomentum	False	False	10	-30	Individual_Deep_Q	1.0	simple_mlp	True	0.05	2500000	8	True
IndivQLearningParticleDNNOnlyOneHot/119_11_9	none		True	-10	False	ParticleMomentum	False	False	10	-30	Individual_Deep_Q	1.0	simple_mlp	True	0.05	2500000	9	True
