# Supplementary material
Source: ML conference proceedings conference paper supplement (https://proceedings.neurips.cc/paper_files/paper/2022/hash/57444e14ecd9e2c8f603b4f012ce3811-Abstract.html)
Supplement: Supplementary file 1 [file 57444e14ecd9e2c8f603b4f012ce3811-Supplemental-Conference.zip › 3410_shield_decentralization_for_sa-Supplementary Material/parallel_configs/IndivQLearningParticleDNNTrain.csv]

run_name	shield	shield_specification	punish_unsafe_orig_action	punish_unsafe_orig_action_modifier	randomize_starts	map_type	particle_agents_observe_momentum	particle_terminate_on_collision	particle_world_size	particle_collision_penalty	learner_type	learner_anneal_eps_start	learner_deep_network_model	learner_transform_one_hot	learner_anneal_eps_finish	max_total_steps	seed	skip_evaluation
IndivQLearningParticleDNN/0_0_0	slugs_centralized	shields/momentum_shield	True	-10	True	ParticleMomentum	True	False	10	-30	Individual_Deep_Q	1.0	simple_mlp	True	0.05	2500000	0	True
IndivQLearningParticleDNN/1_0_1	slugs_centralized	shields/momentum_shield	True	-10	True	ParticleMomentum	True	False	10	-30	Individual_Deep_Q	1.0	simple_mlp	True	0.05	2500000	1	True
IndivQLearningParticleDNN/2_0_2	slugs_centralized	shields/momentum_shield	True	-10	True	ParticleMomentum	True	False	10	-30	Individual_Deep_Q	1.0	simple_mlp	True	0.05	2500000	2	True
IndivQLearningParticleDNN/3_0_3	slugs_centralized	shields/momentum_shield	True	-10	True	ParticleMomentum	True	False	10	-30	Individual_Deep_Q	1.0	simple_mlp	True	0.05	2500000	3	True
IndivQLearningParticleDNN/4_0_4	slugs_centralized	shields/momentum_shield	True	-10	True	ParticleMomentum	True	False	10	-30	Individual_Deep_Q	1.0	simple_mlp	True	0.05	2500000	4	True
IndivQLearningParticleDNN/5_0_5	slugs_centralized	shields/momentum_shield	True	-10	True	ParticleMomentum	True	False	10	-30	Individual_Deep_Q	1.0	simple_mlp	True	0.05	2500000	5	True
IndivQLearningParticleDNN/6_0_6	slugs_centralized	shields/momentum_shield	True	-10	True	ParticleMomentum	True	False	10	-30	Individual_Deep_Q	1.0	simple_mlp	True	0.05	2500000	6	True
IndivQLearningParticleDNN/7_0_7	slugs_centralized	shields/momentum_shield	True	-10	True	ParticleMomentum	True	False	10	-30	Individual_Deep_Q	1.0	simple_mlp	True	0.05	2500000	7	True
IndivQLearningParticleDNN/8_0_8	slugs_centralized	shields/momentum_shield	True	-10	True	ParticleMomentum	True	False	10	-30	Individual_Deep_Q	1.0	simple_mlp	True	0.05	2500000	8	True
IndivQLearningParticleDNN/9_0_9	slugs_centralized	shields/momentum_shield	True	-10	True	ParticleMomentum	True	False	10	-30	Individual_Deep_Q	1.0	simple_mlp	True	0.05	2500000	9	True
IndivQLearningParticleDNN/10_1_0	slugs_centralized	shields/momentum_shield	True	-10	True	ParticleMomentum	True	False	10	-30	Individual_Deep_Q	1.0	simple_mlp	False	0.05	2500000	0	True
IndivQLearningParticleDNN/11_1_1	slugs_centralized	shields/momentum_shield	True	-10	True	ParticleMomentum	True	False	10	-30	Individual_Deep_Q	1.0	simple_mlp	False	0.05	2500000	1	True
IndivQLearningParticleDNN/12_1_2	slugs_centralized	shields/momentum_shield	True	-10	True	ParticleMomentum	True	False	10	-30	Individual_Deep_Q	1.0	simple_mlp	False	0.05	2500000	2	True
IndivQLearningParticleDNN/13_1_3	slugs_centralized	shields/momentum_shield	True	-10	True	ParticleMomentum	True	False	10	-30	Individual_Deep_Q	1.0	simple_mlp	False	0.05	2500000	3	True
IndivQLearningParticleDNN/14_1_4	slugs_centralized	shields/momentum_shield	True	-10	True	ParticleMomentum	True	False	10	-30	Individual_Deep_Q	1.0	simple_mlp	False	0.05	2500000	4	True
IndivQLearningParticleDNN/15_1_5	slugs_centralized	shields/momentum_shield	True	-10	True	ParticleMomentum	True	False	10	-30	Individual_Deep_Q	1.0	simple_mlp	False	0.05	2500000	5	True
IndivQLearningParticleDNN/16_1_6	slugs_centralized	shields/momentum_shield	True	-10	True	ParticleMomentum	True	False	10	-30	Individual_Deep_Q	1.0	simple_mlp	False	0.05	2500000	6	True
IndivQLearningParticleDNN/17_1_7	slugs_centralized	shields/momentum_shield	True	-10	True	ParticleMomentum	True	False	10	-30	Individual_Deep_Q	1.0	simple_mlp	False	0.05	2500000	7	True
IndivQLearningParticleDNN/18_1_8	slugs_centralized	shields/momentum_shield	True	-10	True	ParticleMomentum	True	False	10	-30	Individual_Deep_Q	1.0	simple_mlp	False	0.05	2500000	8	True
IndivQLearningParticleDNN/19_1_9	slugs_centralized	shields/momentum_shield	True	-10	True	ParticleMomentum	True	False	10	-30	Individual_Deep_Q	1.0	simple_mlp	False	0.05	2500000	9	True
IndivQLearningParticleDNN/20_2_0	slugs_centralized	shields/momentum_shield	True	-10	True	ParticleMomentum	False	False	10	-30	Individual_Deep_Q	1.0	simple_mlp	True	0.05	2500000	0	True
IndivQLearningParticleDNN/21_2_1	slugs_centralized	shields/momentum_shield	True	-10	True	ParticleMomentum	False	False	10	-30	Individual_Deep_Q	1.0	simple_mlp	True	0.05	2500000	1	True
IndivQLearningParticleDNN/22_2_2	slugs_centralized	shields/momentum_shield	True	-10	True	ParticleMomentum	False	False	10	-30	Individual_Deep_Q	1.0	simple_mlp	True	0.05	2500000	2	True
IndivQLearningParticleDNN/23_2_3	slugs_centralized	shields/momentum_shield	True	-10	True	ParticleMomentum	False	False	10	-30	Individual_Deep_Q	1.0	simple_mlp	True	0.05	2500000	3	True
IndivQLearningParticleDNN/24_2_4	slugs_centralized	shields/momentum_shield	True	-10	True	ParticleMomentum	False	False	10	-30	Individual_Deep_Q	1.0	simple_mlp	True	0.05	2500000	4	True
IndivQLearningParticleDNN/25_2_5	slugs_centralized	shields/momentum_shield	True	-10	True	ParticleMomentum	False	False	10	-30	Individual_Deep_Q	1.0	simple_mlp	True	0.05	2500000	5	True
IndivQLearningParticleDNN/26_2_6	slugs_centralized	shields/momentum_shield	True	-10	True	ParticleMomentum	False	False	10	-30	Individual_Deep_Q	1.0	simple_mlp	True	0.05	2500000	6	True
IndivQLearningParticleDNN/27_2_7	slugs_centralized	shields/momentum_shield	True	-10	True	ParticleMomentum	False	False	10	-30	Individual_Deep_Q	1.0	simple_mlp	True	0.05	2500000	7	True
IndivQLearningParticleDNN/28_2_8	slugs_centralized	shields/momentum_shield	True	-10	True	ParticleMomentum	False	False	10	-30	Individual_Deep_Q	1.0	simple_mlp	True	0.05	2500000	8	True
IndivQLearningParticleDNN/29_2_9	slugs_centralized	shields/momentum_shield	True	-10	True	ParticleMomentum	False	False	10	-30	Individual_Deep_Q	1.0	simple_mlp	True	0.05	2500000	9	True
IndivQLearningParticleDNN/30_3_0	slugs_centralized	shields/momentum_shield	True	-10	True	ParticleMomentum	False	False	10	-30	Individual_Deep_Q	1.0	simple_mlp	False	0.05	2500000	0	True
IndivQLearningParticleDNN/31_3_1	slugs_centralized	shields/momentum_shield	True	-10	True	ParticleMomentum	False	False	10	-30	Individual_Deep_Q	1.0	simple_mlp	False	0.05	2500000	1	True
IndivQLearningParticleDNN/32_3_2	slugs_centralized	shields/momentum_shield	True	-10	True	ParticleMomentum	False	False	10	-30	Individual_Deep_Q	1.0	simple_mlp	False	0.05	2500000	2	True
IndivQLearningParticleDNN/33_3_3	slugs_centralized	shields/momentum_shield	True	-10	True	ParticleMomentum	False	False	10	-30	Individual_Deep_Q	1.0	simple_mlp	False	0.05	2500000	3	True
IndivQLearningParticleDNN/34_3_4	slugs_centralized	shields/momentum_shield	True	-10	True	ParticleMomentum	False	False	10	-30	Individual_Deep_Q	1.0	simple_mlp	False	0.05	2500000	4	True
IndivQLearningParticleDNN/35_3_5	slugs_centralized	shields/momentum_shield	True	-10	True	ParticleMomentum	False	False	10	-30	Individual_Deep_Q	1.0	simple_mlp	False	0.05	2500000	5	True
IndivQLearningParticleDNN/36_3_6	slugs_centralized	shields/momentum_shield	True	-10	True	ParticleMomentum	False	False	10	-30	Individual_Deep_Q	1.0	simple_mlp	False	0.05	2500000	6	True
IndivQLearningParticleDNN/37_3_7	slugs_centralized	shields/momentum_shield	True	-10	True	ParticleMomentum	False	False	10	-30	Individual_Deep_Q	1.0	simple_mlp	False	0.05	2500000	7	True
IndivQLearningParticleDNN/38_3_8	slugs_centralized	shields/momentum_shield	True	-10	True	ParticleMomentum	False	False	10	-30	Individual_Deep_Q	1.0	simple_mlp	False	0.05	2500000	8	True
IndivQLearningParticleDNN/39_3_9	slugs_centralized	shields/momentum_shield	True	-10	True	ParticleMomentum	False	False	10	-30	Individual_Deep_Q	1.0	simple_mlp	False	0.05	2500000	9	True
IndivQLearningParticleDNN/40_4_0	slugs_decentralized	shields/momentum_shield	True	-10	True	ParticleMomentum	True	False	10	-30	Individual_Deep_Q	1.0	simple_mlp	True	0.05	2500000	0	True
IndivQLearningParticleDNN/41_4_1	slugs_decentralized	shields/momentum_shield	True	-10	True	ParticleMomentum	True	False	10	-30	Individual_Deep_Q	1.0	simple_mlp	True	0.05	2500000	1	True
IndivQLearningParticleDNN/42_4_2	slugs_decentralized	shields/momentum_shield	True	-10	True	ParticleMomentum	True	False	10	-30	Individual_Deep_Q	1.0	simple_mlp	True	0.05	2500000	2	True
IndivQLearningParticleDNN/43_4_3	slugs_decentralized	shields/momentum_shield	True	-10	True	ParticleMomentum	True	False	10	-30	Individual_Deep_Q	1.0	simple_mlp	True	0.05	2500000	3	True
IndivQLearningParticleDNN/44_4_4	slugs_decentralized	shields/momentum_shield	True	-10	True	ParticleMomentum	True	False	10	-30	Individual_Deep_Q	1.0	simple_mlp	True	0.05	2500000	4	True
IndivQLearningParticleDNN/45_4_5	slugs_decentralized	shields/momentum_shield	True	-10	True	ParticleMomentum	True	False	10	-30	Individual_Deep_Q	1.0	simple_mlp	True	0.05	2500000	5	True
IndivQLearningParticleDNN/46_4_6	slugs_decentralized	shields/momentum_shield	True	-10	True	ParticleMomentum	True	False	10	-30	Individual_Deep_Q	1.0	simple_mlp	True	0.05	2500000	6	True
IndivQLearningParticleDNN/47_4_7	slugs_decentralized	shields/momentum_shield	True	-10	True	ParticleMomentum	True	False	10	-30	Individual_Deep_Q	1.0	simple_mlp	True	0.05	2500000	7	True
IndivQLearningParticleDNN/48_4_8	slugs_decentralized	shields/momentum_shield	True	-10	True	ParticleMomentum	True	False	10	-30	Individual_Deep_Q	1.0	simple_mlp	True	0.05	2500000	8	True
IndivQLearningParticleDNN/49_4_9	slugs_decentralized	shields/momentum_shield	True	-10	True	ParticleMomentum	True	False	10	-30	Individual_Deep_Q	1.0	simple_mlp	True	0.05	2500000	9	True
IndivQLearningParticleDNN/50_5_0	slugs_decentralized	shields/momentum_shield	True	-10	True	ParticleMomentum	True	False	10	-30	Individual_Deep_Q	1.0	simple_mlp	False	0.05	2500000	0	True
IndivQLearningParticleDNN/51_5_1	slugs_decentralized	shields/momentum_shield	True	-10	True	ParticleMomentum	True	False	10	-30	Individual_Deep_Q	1.0	simple_mlp	False	0.05	2500000	1	True
IndivQLearningParticleDNN/52_5_2	slugs_decentralized	shields/momentum_shield	True	-10	True	ParticleMomentum	True	False	10	-30	Individual_Deep_Q	1.0	simple_mlp	False	0.05	2500000	2	True
IndivQLearningParticleDNN/53_5_3	slugs_decentralized	shields/momentum_shield	True	-10	True	ParticleMomentum	True	False	10	-30	Individual_Deep_Q	1.0	simple_mlp	False	0.05	2500000	3	True
IndivQLearningParticleDNN/54_5_4	slugs_decentralized	shields/momentum_shield	True	-10	True	ParticleMomentum	True	False	10	-30	Individual_Deep_Q	1.0	simple_mlp	False	0.05	2500000	4	True
IndivQLearningParticleDNN/55_5_5	slugs_decentralized	shields/momentum_shield	True	-10	True	ParticleMomentum	True	False	10	-30	Individual_Deep_Q	1.0	simple_mlp	False	0.05	2500000	5	True
IndivQLearningParticleDNN/56_5_6	slugs_decentralized	shields/momentum_shield	True	-10	True	ParticleMomentum	True	False	10	-30	Individual_Deep_Q	1.0	simple_mlp	False	0.05	2500000	6	True
IndivQLearningParticleDNN/57_5_7	slugs_decentralized	shields/momentum_shield	True	-10	True	ParticleMomentum	True	False	10	-30	Individual_Deep_Q	1.0	simple_mlp	False	0.05	2500000	7	True
IndivQLearningParticleDNN/58_5_8	slugs_decentralized	shields/momentum_shield	True	-10	True	ParticleMomentum	True	False	10	-30	Individual_Deep_Q	1.0	simple_mlp	False	0.05	2500000	8	True
IndivQLearningParticleDNN/59_5_9	slugs_decentralized	shields/momentum_shield	True	-10	True	ParticleMomentum	True	False	10	-30	Individual_Deep_Q	1.0	simple_mlp	False	0.05	2500000	9	True
IndivQLearningParticleDNN/60_6_0	slugs_decentralized	shields/momentum_shield	True	-10	True	ParticleMomentum	False	False	10	-30	Individual_Deep_Q	1.0	simple_mlp	True	0.05	2500000	0	True
IndivQLearningParticleDNN/61_6_1	slugs_decentralized	shields/momentum_shield	True	-10	True	ParticleMomentum	False	False	10	-30	Individual_Deep_Q	1.0	simple_mlp	True	0.05	2500000	1	True
IndivQLearningParticleDNN/62_6_2	slugs_decentralized	shields/momentum_shield	True	-10	True	ParticleMomentum	False	False	10	-30	Individual_Deep_Q	1.0	simple_mlp	True	0.05	2500000	2	True
IndivQLearningParticleDNN/63_6_3	slugs_decentralized	shields/momentum_shield	True	-10	True	ParticleMomentum	False	False	10	-30	Individual_Deep_Q	1.0	simple_mlp	True	0.05	2500000	3	True
IndivQLearningParticleDNN/64_6_4	slugs_decentralized	shields/momentum_shield	True	-10	True	ParticleMomentum	False	False	10	-30	Individual_Deep_Q	1.0	simple_mlp	True	0.05	2500000	4	True
IndivQLearningParticleDNN/65_6_5	slugs_decentralized	shields/momentum_shield	True	-10	True	ParticleMomentum	False	False	10	-30	Individual_Deep_Q	1.0	simple_mlp	True	0.05	2500000	5	True
IndivQLearningParticleDNN/66_6_6	slugs_decentralized	shields/momentum_shield	True	-10	True	ParticleMomentum	False	False	10	-30	Individual_Deep_Q	1.0	simple_mlp	True	0.05	2500000	6	True
IndivQLearningParticleDNN/67_6_7	slugs_decentralized	shields/momentum_shield	True	-10	True	ParticleMomentum	False	False	10	-30	Individual_Deep_Q	1.0	simple_mlp	True	0.05	2500000	7	True
IndivQLearningParticleDNN/68_6_8	slugs_decentralized	shields/momentum_shield	True	-10	True	ParticleMomentum	False	False	10	-30	Individual_Deep_Q	1.0	simple_mlp	True	0.05	2500000	8	True
IndivQLearningParticleDNN/69_6_9	slugs_decentralized	shields/momentum_shield	True	-10	True	ParticleMomentum	False	False	10	-30	Individual_Deep_Q	1.0	simple_mlp	True	0.05	2500000	9	True
IndivQLearningParticleDNN/70_7_0	slugs_decentralized	shields/momentum_shield	True	-10	True	ParticleMomentum	False	False	10	-30	Individual_Deep_Q	1.0	simple_mlp	False	0.05	2500000	0	True
IndivQLearningParticleDNN/71_7_1	slugs_decentralized	shields/momentum_shield	True	-10	True	ParticleMomentum	False	False	10	-30	Individual_Deep_Q	1.0	simple_mlp	False	0.05	2500000	1	True
IndivQLearningParticleDNN/72_7_2	slugs_decentralized	shields/momentum_shield	True	-10	True	ParticleMomentum	False	False	10	-30	Individual_Deep_Q	1.0	simple_mlp	False	0.05	2500000	2	True
IndivQLearningParticleDNN/73_7_3	slugs_decentralized	shields/momentum_shield	True	-10	True	ParticleMomentum	False	False	10	-30	Individual_Deep_Q	1.0	simple_mlp	False	0.05	2500000	3	True
IndivQLearningParticleDNN/74_7_4	slugs_decentralized	shields/momentum_shield	True	-10	True	ParticleMomentum	False	False	10	-30	Individual_Deep_Q	1.0	simple_mlp	False	0.05	2500000	4	True
IndivQLearningParticleDNN/75_7_5	slugs_decentralized	shields/momentum_shield	True	-10	True	ParticleMomentum	False	False	10	-30	Individual_Deep_Q	1.0	simple_mlp	False	0.05	2500000	5	True
IndivQLearningParticleDNN/76_7_6	slugs_decentralized	shields/momentum_shield	True	-10	True	ParticleMomentum	False	False	10	-30	Individual_Deep_Q	1.0	simple_mlp	False	0.05	2500000	6	True
IndivQLearningParticleDNN/77_7_7	slugs_decentralized	shields/momentum_shield	True	-10	True	ParticleMomentum	False	False	10	-30	Individual_Deep_Q	1.0	simple_mlp	False	0.05	2500000	7	True
IndivQLearningParticleDNN/78_7_8	slugs_decentralized	shields/momentum_shield	True	-10	True	ParticleMomentum	False	False	10	-30	Individual_Deep_Q	1.0	simple_mlp	False	0.05	2500000	8	True
IndivQLearningParticleDNN/79_7_9	slugs_decentralized	shields/momentum_shield	True	-10	True	ParticleMomentum	False	False	10	-30	Individual_Deep_Q	1.0	simple_mlp	False	0.05	2500000	9	True
IndivQLearningParticleDNN/80_8_0	none		True	-10	True	ParticleMomentum	True	False	10	-30	Individual_Deep_Q	1.0	simple_mlp	True	0.05	2500000	0	True
IndivQLearningParticleDNN/81_8_1	none		True	-10	True	ParticleMomentum	True	False	10	-30	Individual_Deep_Q	1.0	simple_mlp	True	0.05	2500000	1	True
IndivQLearningParticleDNN/82_8_2	none		True	-10	True	ParticleMomentum	True	False	10	-30	Individual_Deep_Q	1.0	simple_mlp	True	0.05	2500000	2	True
IndivQLearningParticleDNN/83_8_3	none		True	-10	True	ParticleMomentum	True	False	10	-30	Individual_Deep_Q	1.0	simple_mlp	True	0.05	2500000	3	True
IndivQLearningParticleDNN/84_8_4	none		True	-10	True	ParticleMomentum	True	False	10	-30	Individual_Deep_Q	1.0	simple_mlp	True	0.05	2500000	4	True
IndivQLearningParticleDNN/85_8_5	none		True	-10	True	ParticleMomentum	True	False	10	-30	Individual_Deep_Q	1.0	simple_mlp	True	0.05	2500000	5	True
IndivQLearningParticleDNN/86_8_6	none		True	-10	True	ParticleMomentum	True	False	10	-30	Individual_Deep_Q	1.0	simple_mlp	True	0.05	2500000	6	True
IndivQLearningParticleDNN/87_8_7	none		True	-10	True	ParticleMomentum	True	False	10	-30	Individual_Deep_Q	1.0	simple_mlp	True	0.05	2500000	7	True
IndivQLearningParticleDNN/88_8_8	none		True	-10	True	ParticleMomentum	True	False	10	-30	Individual_Deep_Q	1.0	simple_mlp	True	0.05	2500000	8	True
IndivQLearningParticleDNN/89_8_9	none		True	-10	True	ParticleMomentum	True	False	10	-30	Individual_Deep_Q	1.0	simple_mlp	True	0.05	2500000	9	True
IndivQLearningParticleDNN/90_9_0	none		True	-10	True	ParticleMomentum	True	False	10	-30	Individual_Deep_Q	1.0	simple_mlp	False	0.05	2500000	0	True
IndivQLearningParticleDNN/91_9_1	none		True	-10	True	ParticleMomentum	True	False	10	-30	Individual_Deep_Q	1.0	simple_mlp	False	0.05	2500000	1	True
IndivQLearningParticleDNN/92_9_2	none		True	-10	True	ParticleMomentum	True	False	10	-30	Individual_Deep_Q	1.0	simple_mlp	False	0.05	2500000	2	True
IndivQLearningParticleDNN/93_9_3	none		True	-10	True	ParticleMomentum	True	False	10	-30	Individual_Deep_Q	1.0	simple_mlp	False	0.05	2500000	3	True
IndivQLearningParticleDNN/94_9_4	none		True	-10	True	ParticleMomentum	True	False	10	-30	Individual_Deep_Q	1.0	simple_mlp	False	0.05	2500000	4	True
IndivQLearningParticleDNN/95_9_5	none		True	-10	True	ParticleMomentum	True	False	10	-30	Individual_Deep_Q	1.0	simple_mlp	False	0.05	2500000	5	True
IndivQLearningParticleDNN/96_9_6	none		True	-10	True	ParticleMomentum	True	False	10	-30	Individual_Deep_Q	1.0	simple_mlp	False	0.05	2500000	6	True
IndivQLearningParticleDNN/97_9_7	none		True	-10	True	ParticleMomentum	True	False	10	-30	Individual_Deep_Q	1.0	simple_mlp	False	0.05	2500000	7	True
IndivQLearningParticleDNN/98_9_8	none		True	-10	True	ParticleMomentum	True	False	10	-30	Individual_Deep_Q	1.0	simple_mlp	False	0.05	2500000	8	True
IndivQLearningParticleDNN/99_9_9	none		True	-10	True	ParticleMomentum	True	False	10	-30	Individual_Deep_Q	1.0	simple_mlp	False	0.05	2500000	9	True
IndivQLearningParticleDNN/100_10_0	none		True	-10	True	ParticleMomentum	False	False	10	-30	Individual_Deep_Q	1.0	simple_mlp	True	0.05	2500000	0	True
IndivQLearningParticleDNN/101_10_1	none		True	-10	True	ParticleMomentum	False	False	10	-30	Individual_Deep_Q	1.0	simple_mlp	True	0.05	2500000	1	True
IndivQLearningParticleDNN/102_10_2	none		True	-10	True	ParticleMomentum	False	False	10	-30	Individual_Deep_Q	1.0	simple_mlp	True	0.05	2500000	2	True
IndivQLearningParticleDNN/103_10_3	none		True	-10	True	ParticleMomentum	False	False	10	-30	Individual_Deep_Q	1.0	simple_mlp	True	0.05	2500000	3	True
IndivQLearningParticleDNN/104_10_4	none		True	-10	True	ParticleMomentum	False	False	10	-30	Individual_Deep_Q	1.0	simple_mlp	True	0.05	2500000	4	True
IndivQLearningParticleDNN/105_10_5	none		True	-10	True	ParticleMomentum	False	False	10	-30	Individual_Deep_Q	1.0	simple_mlp	True	0.05	2500000	5	True
IndivQLearningParticleDNN/106_10_6	none		True	-10	True	ParticleMomentum	False	False	10	-30	Individual_Deep_Q	1.0	simple_mlp	True	0.05	2500000	6	True
IndivQLearningParticleDNN/107_10_7	none		True	-10	True	ParticleMomentum	False	False	10	-30	Individual_Deep_Q	1.0	simple_mlp	True	0.05	2500000	7	True
IndivQLearningParticleDNN/108_10_8	none		True	-10	True	ParticleMomentum	False	False	10	-30	Individual_Deep_Q	1.0	simple_mlp	True	0.05	2500000	8	True
IndivQLearningParticleDNN/109_10_9	none		True	-10	True	ParticleMomentum	False	False	10	-30	Individual_Deep_Q	1.0	simple_mlp	True	0.05	2500000	9	True
IndivQLearningParticleDNN/110_11_0	none		True	-10	True	ParticleMomentum	False	False	10	-30	Individual_Deep_Q	1.0	simple_mlp	False	0.05	2500000	0	True
IndivQLearningParticleDNN/111_11_1	none		True	-10	True	ParticleMomentum	False	False	10	-30	Individual_Deep_Q	1.0	simple_mlp	False	0.05	2500000	1	True
IndivQLearningParticleDNN/112_11_2	none		True	-10	True	ParticleMomentum	False	False	10	-30	Individual_Deep_Q	1.0	simple_mlp	False	0.05	2500000	2	True
IndivQLearningParticleDNN/113_11_3	none		True	-10	True	ParticleMomentum	False	False	10	-30	Individual_Deep_Q	1.0	simple_mlp	False	0.05	2500000	3	True
IndivQLearningParticleDNN/114_11_4	none		True	-10	True	ParticleMomentum	False	False	10	-30	Individual_Deep_Q	1.0	simple_mlp	False	0.05	2500000	4	True
IndivQLearningParticleDNN/115_11_5	none		True	-10	True	ParticleMomentum	False	False	10	-30	Individual_Deep_Q	1.0	simple_mlp	False	0.05	2500000	5	True
IndivQLearningParticleDNN/116_11_6	none		True	-10	True	ParticleMomentum	False	False	10	-30	Individual_Deep_Q	1.0	simple_mlp	False	0.05	2500000	6	True
IndivQLearningParticleDNN/117_11_7	none		True	-10	True	ParticleMomentum	False	False	10	-30	Individual_Deep_Q	1.0	simple_mlp	False	0.05	2500000	7	True
IndivQLearningParticleDNN/118_11_8	none		True	-10	True	ParticleMomentum	False	False	10	-30	Individual_Deep_Q	1.0	simple_mlp	False	0.05	2500000	8	True
IndivQLearningParticleDNN/119_11_9	none		True	-10	True	ParticleMomentum	False	False	10	-30	Individual_Deep_Q	1.0	simple_mlp	False	0.05	2500000	9	True
IndivQLearningParticleDNN/120_12_0	slugs_centralized	shields/momentum_shield	True	-10	False	ParticleMomentum	True	False	10	-30	Individual_Deep_Q	1.0	simple_mlp	True	0.05	2500000	0	True
IndivQLearningParticleDNN/121_12_1	slugs_centralized	shields/momentum_shield	True	-10	False	ParticleMomentum	True	False	10	-30	Individual_Deep_Q	1.0	simple_mlp	True	0.05	2500000	1	True
IndivQLearningParticleDNN/122_12_2	slugs_centralized	shields/momentum_shield	True	-10	False	ParticleMomentum	True	False	10	-30	Individual_Deep_Q	1.0	simple_mlp	True	0.05	2500000	2	True
IndivQLearningParticleDNN/123_12_3	slugs_centralized	shields/momentum_shield	True	-10	False	ParticleMomentum	True	False	10	-30	Individual_Deep_Q	1.0	simple_mlp	True	0.05	2500000	3	True
IndivQLearningParticleDNN/124_12_4	slugs_centralized	shields/momentum_shield	True	-10	False	ParticleMomentum	True	False	10	-30	Individual_Deep_Q	1.0	simple_mlp	True	0.05	2500000	4	True
IndivQLearningParticleDNN/125_12_5	slugs_centralized	shields/momentum_shield	True	-10	False	ParticleMomentum	True	False	10	-30	Individual_Deep_Q	1.0	simple_mlp	True	0.05	2500000	5	True
IndivQLearningParticleDNN/126_12_6	slugs_centralized	shields/momentum_shield	True	-10	False	ParticleMomentum	True	False	10	-30	Individual_Deep_Q	1.0	simple_mlp	True	0.05	2500000	6	True
IndivQLearningParticleDNN/127_12_7	slugs_centralized	shields/momentum_shield	True	-10	False	ParticleMomentum	True	False	10	-30	Individual_Deep_Q	1.0	simple_mlp	True	0.05	2500000	7	True
IndivQLearningParticleDNN/128_12_8	slugs_centralized	shields/momentum_shield	True	-10	False	ParticleMomentum	True	False	10	-30	Individual_Deep_Q	1.0	simple_mlp	True	0.05	2500000	8	True
IndivQLearningParticleDNN/129_12_9	slugs_centralized	shields/momentum_shield	True	-10	False	ParticleMomentum	True	False	10	-30	Individual_Deep_Q	1.0	simple_mlp	True	0.05	2500000	9	True
IndivQLearningParticleDNN/130_13_0	slugs_centralized	shields/momentum_shield	True	-10	False	ParticleMomentum	True	False	10	-30	Individual_Deep_Q	1.0	simple_mlp	False	0.05	2500000	0	True
IndivQLearningParticleDNN/131_13_1	slugs_centralized	shields/momentum_shield	True	-10	False	ParticleMomentum	True	False	10	-30	Individual_Deep_Q	1.0	simple_mlp	False	0.05	2500000	1	True
IndivQLearningParticleDNN/132_13_2	slugs_centralized	shields/momentum_shield	True	-10	False	ParticleMomentum	True	False	10	-30	Individual_Deep_Q	1.0	simple_mlp	False	0.05	2500000	2	True
IndivQLearningParticleDNN/133_13_3	slugs_centralized	shields/momentum_shield	True	-10	False	ParticleMomentum	True	False	10	-30	Individual_Deep_Q	1.0	simple_mlp	False	0.05	2500000	3	True
IndivQLearningParticleDNN/134_13_4	slugs_centralized	shields/momentum_shield	True	-10	False	ParticleMomentum	True	False	10	-30	Individual_Deep_Q	1.0	simple_mlp	False	0.05	2500000	4	True
IndivQLearningParticleDNN/135_13_5	slugs_centralized	shields/momentum_shield	True	-10	False	ParticleMomentum	True	False	10	-30	Individual_Deep_Q	1.0	simple_mlp	False	0.05	2500000	5	True
IndivQLearningParticleDNN/136_13_6	slugs_centralized	shields/momentum_shield	True	-10	False	ParticleMomentum	True	False	10	-30	Individual_Deep_Q	1.0	simple_mlp	False	0.05	2500000	6	True
IndivQLearningParticleDNN/137_13_7	slugs_centralized	shields/momentum_shield	True	-10	False	ParticleMomentum	True	False	10	-30	Individual_Deep_Q	1.0	simple_mlp	False	0.05	2500000	7	True
IndivQLearningParticleDNN/138_13_8	slugs_centralized	shields/momentum_shield	True	-10	False	ParticleMomentum	True	False	10	-30	Individual_Deep_Q	1.0	simple_mlp	False	0.05	2500000	8	True
IndivQLearningParticleDNN/139_13_9	slugs_centralized	shields/momentum_shield	True	-10	False	ParticleMomentum	True	False	10	-30	Individual_Deep_Q	1.0	simple_mlp	False	0.05	2500000	9	True
IndivQLearningParticleDNN/140_14_0	slugs_centralized	shields/momentum_shield	True	-10	False	ParticleMomentum	False	False	10	-30	Individual_Deep_Q	1.0	simple_mlp	True	0.05	2500000	0	True
IndivQLearningParticleDNN/141_14_1	slugs_centralized	shields/momentum_shield	True	-10	False	ParticleMomentum	False	False	10	-30	Individual_Deep_Q	1.0	simple_mlp	True	0.05	2500000	1	True
IndivQLearningParticleDNN/142_14_2	slugs_centralized	shields/momentum_shield	True	-10	False	ParticleMomentum	False	False	10	-30	Individual_Deep_Q	1.0	simple_mlp	True	0.05	2500000	2	True
IndivQLearningParticleDNN/143_14_3	slugs_centralized	shields/momentum_shield	True	-10	False	ParticleMomentum	False	False	10	-30	Individual_Deep_Q	1.0	simple_mlp	True	0.05	2500000	3	True
IndivQLearningParticleDNN/144_14_4	slugs_centralized	shields/momentum_shield	True	-10	False	ParticleMomentum	False	False	10	-30	Individual_Deep_Q	1.0	simple_mlp	True	0.05	2500000	4	True
IndivQLearningParticleDNN/145_14_5	slugs_centralized	shields/momentum_shield	True	-10	False	ParticleMomentum	False	False	10	-30	Individual_Deep_Q	1.0	simple_mlp	True	0.05	2500000	5	True
IndivQLearningParticleDNN/146_14_6	slugs_centralized	shields/momentum_shield	True	-10	False	ParticleMomentum	False	False	10	-30	Individual_Deep_Q	1.0	simple_mlp	True	0.05	2500000	6	True
IndivQLearningParticleDNN/147_14_7	slugs_centralized	shields/momentum_shield	True	-10	False	ParticleMomentum	False	False	10	-30	Individual_Deep_Q	1.0	simple_mlp	True	0.05	2500000	7	True
IndivQLearningParticleDNN/148_14_8	slugs_centralized	shields/momentum_shield	True	-10	False	ParticleMomentum	False	False	10	-30	Individual_Deep_Q	1.0	simple_mlp	True	0.05	2500000	8	True
IndivQLearningParticleDNN/149_14_9	slugs_centralized	shields/momentum_shield	True	-10	False	ParticleMomentum	False	False	10	-30	Individual_Deep_Q	1.0	simple_mlp	True	0.05	2500000	9	True
IndivQLearningParticleDNN/150_15_0	slugs_centralized	shields/momentum_shield	True	-10	False	ParticleMomentum	False	False	10	-30	Individual_Deep_Q	1.0	simple_mlp	False	0.05	2500000	0	True
IndivQLearningParticleDNN/151_15_1	slugs_centralized	shields/momentum_shield	True	-10	False	ParticleMomentum	False	False	10	-30	Individual_Deep_Q	1.0	simple_mlp	False	0.05	2500000	1	True
IndivQLearningParticleDNN/152_15_2	slugs_centralized	shields/momentum_shield	True	-10	False	ParticleMomentum	False	False	10	-30	Individual_Deep_Q	1.0	simple_mlp	False	0.05	2500000	2	True
IndivQLearningParticleDNN/153_15_3	slugs_centralized	shields/momentum_shield	True	-10	False	ParticleMomentum	False	False	10	-30	Individual_Deep_Q	1.0	simple_mlp	False	0.05	2500000	3	True
IndivQLearningParticleDNN/154_15_4	slugs_centralized	shields/momentum_shield	True	-10	False	ParticleMomentum	False	False	10	-30	Individual_Deep_Q	1.0	simple_mlp	False	0.05	2500000	4	True
IndivQLearningParticleDNN/155_15_5	slugs_centralized	shields/momentum_shield	True	-10	False	ParticleMomentum	False	False	10	-30	Individual_Deep_Q	1.0	simple_mlp	False	0.05	2500000	5	True
IndivQLearningParticleDNN/156_15_6	slugs_centralized	shields/momentum_shield	True	-10	False	ParticleMomentum	False	False	10	-30	Individual_Deep_Q	1.0	simple_mlp	False	0.05	2500000	6	True
IndivQLearningParticleDNN/157_15_7	slugs_centralized	shields/momentum_shield	True	-10	False	ParticleMomentum	False	False	10	-30	Individual_Deep_Q	1.0	simple_mlp	False	0.05	2500000	7	True
IndivQLearningParticleDNN/158_15_8	slugs_centralized	shields/momentum_shield	True	-10	False	ParticleMomentum	False	False	10	-30	Individual_Deep_Q	1.0	simple_mlp	False	0.05	2500000	8	True
IndivQLearningParticleDNN/159_15_9	slugs_centralized	shields/momentum_shield	True	-10	False	ParticleMomentum	False	False	10	-30	Individual_Deep_Q	1.0	simple_mlp	False	0.05	2500000	9	True
IndivQLearningParticleDNN/160_16_0	slugs_decentralized	shields/momentum_shield	True	-10	False	ParticleMomentum	True	False	10	-30	Individual_Deep_Q	1.0	simple_mlp	True	0.05	2500000	0	True
IndivQLearningParticleDNN/161_16_1	slugs_decentralized	shields/momentum_shield	True	-10	False	ParticleMomentum	True	False	10	-30	Individual_Deep_Q	1.0	simple_mlp	True	0.05	2500000	1	True
IndivQLearningParticleDNN/162_16_2	slugs_decentralized	shields/momentum_shield	True	-10	False	ParticleMomentum	True	False	10	-30	Individual_Deep_Q	1.0	simple_mlp	True	0.05	2500000	2	True
IndivQLearningParticleDNN/163_16_3	slugs_decentralized	shields/momentum_shield	True	-10	False	ParticleMomentum	True	False	10	-30	Individual_Deep_Q	1.0	simple_mlp	True	0.05	2500000	3	True
IndivQLearningParticleDNN/164_16_4	slugs_decentralized	shields/momentum_shield	True	-10	False	ParticleMomentum	True	False	10	-30	Individual_Deep_Q	1.0	simple_mlp	True	0.05	2500000	4	True
IndivQLearningParticleDNN/165_16_5	slugs_decentralized	shields/momentum_shield	True	-10	False	ParticleMomentum	True	False	10	-30	Individual_Deep_Q	1.0	simple_mlp	True	0.05	2500000	5	True
IndivQLearningParticleDNN/166_16_6	slugs_decentralized	shields/momentum_shield	True	-10	False	ParticleMomentum	True	False	10	-30	Individual_Deep_Q	1.0	simple_mlp	True	0.05	2500000	6	True
IndivQLearningParticleDNN/167_16_7	slugs_decentralized	shields/momentum_shield	True	-10	False	ParticleMomentum	True	False	10	-30	Individual_Deep_Q	1.0	simple_mlp	True	0.05	2500000	7	True
IndivQLearningParticleDNN/168_16_8	slugs_decentralized	shields/momentum_shield	True	-10	False	ParticleMomentum	True	False	10	-30	Individual_Deep_Q	1.0	simple_mlp	True	0.05	2500000	8	True
IndivQLearningParticleDNN/169_16_9	slugs_decentralized	shields/momentum_shield	True	-10	False	ParticleMomentum	True	False	10	-30	Individual_Deep_Q	1.0	simple_mlp	True	0.05	2500000	9	True
IndivQLearningParticleDNN/170_17_0	slugs_decentralized	shields/momentum_shield	True	-10	False	ParticleMomentum	True	False	10	-30	Individual_Deep_Q	1.0	simple_mlp	False	0.05	2500000	0	True
IndivQLearningParticleDNN/171_17_1	slugs_decentralized	shields/momentum_shield	True	-10	False	ParticleMomentum	True	False	10	-30	Individual_Deep_Q	1.0	simple_mlp	False	0.05	2500000	1	True
IndivQLearningParticleDNN/172_17_2	slugs_decentralized	shields/momentum_shield	True	-10	False	ParticleMomentum	True	False	10	-30	Individual_Deep_Q	1.0	simple_mlp	False	0.05	2500000	2	True
IndivQLearningParticleDNN/173_17_3	slugs_decentralized	shields/momentum_shield	True	-10	False	ParticleMomentum	True	False	10	-30	Individual_Deep_Q	1.0	simple_mlp	False	0.05	2500000	3	True
IndivQLearningParticleDNN/174_17_4	slugs_decentralized	shields/momentum_shield	True	-10	False	ParticleMomentum	True	False	10	-30	Individual_Deep_Q	1.0	simple_mlp	False	0.05	2500000	4	True
IndivQLearningParticleDNN/175_17_5	slugs_decentralized	shields/momentum_shield	True	-10	False	ParticleMomentum	True	False	10	-30	Individual_Deep_Q	1.0	simple_mlp	False	0.05	2500000	5	True
IndivQLearningParticleDNN/176_17_6	slugs_decentralized	shields/momentum_shield	True	-10	False	ParticleMomentum	True	False	10	-30	Individual_Deep_Q	1.0	simple_mlp	False	0.05	2500000	6	True
IndivQLearningParticleDNN/177_17_7	slugs_decentralized	shields/momentum_shield	True	-10	False	ParticleMomentum	True	False	10	-30	Individual_Deep_Q	1.0	simple_mlp	False	0.05	2500000	7	True
IndivQLearningParticleDNN/178_17_8	slugs_decentralized	shields/momentum_shield	True	-10	False	ParticleMomentum	True	False	10	-30	Individual_Deep_Q	1.0	simple_mlp	False	0.05	2500000	8	True
IndivQLearningParticleDNN/179_17_9	slugs_decentralized	shields/momentum_shield	True	-10	False	ParticleMomentum	True	False	10	-30	Individual_Deep_Q	1.0	simple_mlp	False	0.05	2500000	9	True
IndivQLearningParticleDNN/180_18_0	slugs_decentralized	shields/momentum_shield	True	-10	False	ParticleMomentum	False	False	10	-30	Individual_Deep_Q	1.0	simple_mlp	True	0.05	2500000	0	True
IndivQLearningParticleDNN/181_18_1	slugs_decentralized	shields/momentum_shield	True	-10	False	ParticleMomentum	False	False	10	-30	Individual_Deep_Q	1.0	simple_mlp	True	0.05	2500000	1	True
IndivQLearningParticleDNN/182_18_2	slugs_decentralized	shields/momentum_shield	True	-10	False	ParticleMomentum	False	False	10	-30	Individual_Deep_Q	1.0	simple_mlp	True	0.05	2500000	2	True
IndivQLearningParticleDNN/183_18_3	slugs_decentralized	shields/momentum_shield	True	-10	False	ParticleMomentum	False	False	10	-30	Individual_Deep_Q	1.0	simple_mlp	True	0.05	2500000	3	True
IndivQLearningParticleDNN/184_18_4	slugs_decentralized	shields/momentum_shield	True	-10	False	ParticleMomentum	False	False	10	-30	Individual_Deep_Q	1.0	simple_mlp	True	0.05	2500000	4	True
IndivQLearningParticleDNN/185_18_5	slugs_decentralized	shields/momentum_shield	True	-10	False	ParticleMomentum	False	False	10	-30	Individual_Deep_Q	1.0	simple_mlp	True	0.05	2500000	5	True
IndivQLearningParticleDNN/186_18_6	slugs_decentralized	shields/momentum_shield	True	-10	False	ParticleMomentum	False	False	10	-30	Individual_Deep_Q	1.0	simple_mlp	True	0.05	2500000	6	True
IndivQLearningParticleDNN/187_18_7	slugs_decentralized	shields/momentum_shield	True	-10	False	ParticleMomentum	False	False	10	-30	Individual_Deep_Q	1.0	simple_mlp	True	0.05	2500000	7	True
IndivQLearningParticleDNN/188_18_8	slugs_decentralized	shields/momentum_shield	True	-10	False	ParticleMomentum	False	False	10	-30	Individual_Deep_Q	1.0	simple_mlp	True	0.05	2500000	8	True
IndivQLearningParticleDNN/189_18_9	slugs_decentralized	shields/momentum_shield	True	-10	False	ParticleMomentum	False	False	10	-30	Individual_Deep_Q	1.0	simple_mlp	True	0.05	2500000	9	True
IndivQLearningParticleDNN/190_19_0	slugs_decentralized	shields/momentum_shield	True	-10	False	ParticleMomentum	False	False	10	-30	Individual_Deep_Q	1.0	simple_mlp	False	0.05	2500000	0	True
IndivQLearningParticleDNN/191_19_1	slugs_decentralized	shields/momentum_shield	True	-10	False	ParticleMomentum	False	False	10	-30	Individual_Deep_Q	1.0	simple_mlp	False	0.05	2500000	1	True
IndivQLearningParticleDNN/192_19_2	slugs_decentralized	shields/momentum_shield	True	-10	False	ParticleMomentum	False	False	10	-30	Individual_Deep_Q	1.0	simple_mlp	False	0.05	2500000	2	True
IndivQLearningParticleDNN/193_19_3	slugs_decentralized	shields/momentum_shield	True	-10	False	ParticleMomentum	False	False	10	-30	Individual_Deep_Q	1.0	simple_mlp	False	0.05	2500000	3	True
IndivQLearningParticleDNN/194_19_4	slugs_decentralized	shields/momentum_shield	True	-10	False	ParticleMomentum	False	False	10	-30	Individual_Deep_Q	1.0	simple_mlp	False	0.05	2500000	4	True
IndivQLearningParticleDNN/195_19_5	slugs_decentralized	shields/momentum_shield	True	-10	False	ParticleMomentum	False	False	10	-30	Individual_Deep_Q	1.0	simple_mlp	False	0.05	2500000	5	True
IndivQLearningParticleDNN/196_19_6	slugs_decentralized	shields/momentum_shield	True	-10	False	ParticleMomentum	False	False	10	-30	Individual_Deep_Q	1.0	simple_mlp	False	0.05	2500000	6	True
IndivQLearningParticleDNN/197_19_7	slugs_decentralized	shields/momentum_shield	True	-10	False	ParticleMomentum	False	False	10	-30	Individual_Deep_Q	1.0	simple_mlp	False	0.05	2500000	7	True
IndivQLearningParticleDNN/198_19_8	slugs_decentralized	shields/momentum_shield	True	-10	False	ParticleMomentum	False	False	10	-30	Individual_Deep_Q	1.0	simple_mlp	False	0.05	2500000	8	True
IndivQLearningParticleDNN/199_19_9	slugs_decentralized	shields/momentum_shield	True	-10	False	ParticleMomentum	False	False	10	-30	Individual_Deep_Q	1.0	simple_mlp	False	0.05	2500000	9	True
IndivQLearningParticleDNN/200_20_0	none		True	-10	False	ParticleMomentum	True	False	10	-30	Individual_Deep_Q	1.0	simple_mlp	True	0.05	2500000	0	True
IndivQLearningParticleDNN/201_20_1	none		True	-10	False	ParticleMomentum	True	False	10	-30	Individual_Deep_Q	1.0	simple_mlp	True	0.05	2500000	1	True
IndivQLearningParticleDNN/202_20_2	none		True	-10	False	ParticleMomentum	True	False	10	-30	Individual_Deep_Q	1.0	simple_mlp	True	0.05	2500000	2	True
IndivQLearningParticleDNN/203_20_3	none		True	-10	False	ParticleMomentum	True	False	10	-30	Individual_Deep_Q	1.0	simple_mlp	True	0.05	2500000	3	True
IndivQLearningParticleDNN/204_20_4	none		True	-10	False	ParticleMomentum	True	False	10	-30	Individual_Deep_Q	1.0	simple_mlp	True	0.05	2500000	4	True
IndivQLearningParticleDNN/205_20_5	none		True	-10	False	ParticleMomentum	True	False	10	-30	Individual_Deep_Q	1.0	simple_mlp	True	0.05	2500000	5	True
IndivQLearningParticleDNN/206_20_6	none		True	-10	False	ParticleMomentum	True	False	10	-30	Individual_Deep_Q	1.0	simple_mlp	True	0.05	2500000	6	True
IndivQLearningParticleDNN/207_20_7	none		True	-10	False	ParticleMomentum	True	False	10	-30	Individual_Deep_Q	1.0	simple_mlp	True	0.05	2500000	7	True
IndivQLearningParticleDNN/208_20_8	none		True	-10	False	ParticleMomentum	True	False	10	-30	Individual_Deep_Q	1.0	simple_mlp	True	0.05	2500000	8	True
IndivQLearningParticleDNN/209_20_9	none		True	-10	False	ParticleMomentum	True	False	10	-30	Individual_Deep_Q	1.0	simple_mlp	True	0.05	2500000	9	True
IndivQLearningParticleDNN/210_21_0	none		True	-10	False	ParticleMomentum	True	False	10	-30	Individual_Deep_Q	1.0	simple_mlp	False	0.05	2500000	0	True
IndivQLearningParticleDNN/211_21_1	none		True	-10	False	ParticleMomentum	True	False	10	-30	Individual_Deep_Q	1.0	simple_mlp	False	0.05	2500000	1	True
IndivQLearningParticleDNN/212_21_2	none		True	-10	False	ParticleMomentum	True	False	10	-30	Individual_Deep_Q	1.0	simple_mlp	False	0.05	2500000	2	True
IndivQLearningParticleDNN/213_21_3	none		True	-10	False	ParticleMomentum	True	False	10	-30	Individual_Deep_Q	1.0	simple_mlp	False	0.05	2500000	3	True
IndivQLearningParticleDNN/214_21_4	none		True	-10	False	ParticleMomentum	True	False	10	-30	Individual_Deep_Q	1.0	simple_mlp	False	0.05	2500000	4	True
IndivQLearningParticleDNN/215_21_5	none		True	-10	False	ParticleMomentum	True	False	10	-30	Individual_Deep_Q	1.0	simple_mlp	False	0.05	2500000	5	True
IndivQLearningParticleDNN/216_21_6	none		True	-10	False	ParticleMomentum	True	False	10	-30	Individual_Deep_Q	1.0	simple_mlp	False	0.05	2500000	6	True
IndivQLearningParticleDNN/217_21_7	none		True	-10	False	ParticleMomentum	True	False	10	-30	Individual_Deep_Q	1.0	simple_mlp	False	0.05	2500000	7	True
IndivQLearningParticleDNN/218_21_8	none		True	-10	False	ParticleMomentum	True	False	10	-30	Individual_Deep_Q	1.0	simple_mlp	False	0.05	2500000	8	True
IndivQLearningParticleDNN/219_21_9	none		True	-10	False	ParticleMomentum	True	False	10	-30	Individual_Deep_Q	1.0	simple_mlp	False	0.05	2500000	9	True
IndivQLearningParticleDNN/220_22_0	none		True	-10	False	ParticleMomentum	False	False	10	-30	Individual_Deep_Q	1.0	simple_mlp	True	0.05	2500000	0	True
IndivQLearningParticleDNN/221_22_1	none		True	-10	False	ParticleMomentum	False	False	10	-30	Individual_Deep_Q	1.0	simple_mlp	True	0.05	2500000	1	True
IndivQLearningParticleDNN/222_22_2	none		True	-10	False	ParticleMomentum	False	False	10	-30	Individual_Deep_Q	1.0	simple_mlp	True	0.05	2500000	2	True
IndivQLearningParticleDNN/223_22_3	none		True	-10	False	ParticleMomentum	False	False	10	-30	Individual_Deep_Q	1.0	simple_mlp	True	0.05	2500000	3	True
IndivQLearningParticleDNN/224_22_4	none		True	-10	False	ParticleMomentum	False	False	10	-30	Individual_Deep_Q	1.0	simple_mlp	True	0.05	2500000	4	True
IndivQLearningParticleDNN/225_22_5	none		True	-10	False	ParticleMomentum	False	False	10	-30	Individual_Deep_Q	1.0	simple_mlp	True	0.05	2500000	5	True
IndivQLearningParticleDNN/226_22_6	none		True	-10	False	ParticleMomentum	False	False	10	-30	Individual_Deep_Q	1.0	simple_mlp	True	0.05	2500000	6	True
IndivQLearningParticleDNN/227_22_7	none		True	-10	False	ParticleMomentum	False	False	10	-30	Individual_Deep_Q	1.0	simple_mlp	True	0.05	2500000	7	True
IndivQLearningParticleDNN/228_22_8	none		True	-10	False	ParticleMomentum	False	False	10	-30	Individual_Deep_Q	1.0	simple_mlp	True	0.05	2500000	8	True
IndivQLearningParticleDNN/229_22_9	none		True	-10	False	ParticleMomentum	False	False	10	-30	Individual_Deep_Q	1.0	simple_mlp	True	0.05	2500000	9	True
IndivQLearningParticleDNN/230_23_0	none		True	-10	False	ParticleMomentum	False	False	10	-30	Individual_Deep_Q	1.0	simple_mlp	False	0.05	2500000	0	True
IndivQLearningParticleDNN/231_23_1	none		True	-10	False	ParticleMomentum	False	False	10	-30	Individual_Deep_Q	1.0	simple_mlp	False	0.05	2500000	1	True
IndivQLearningParticleDNN/232_23_2	none		True	-10	False	ParticleMomentum	False	False	10	-30	Individual_Deep_Q	1.0	simple_mlp	False	0.05	2500000	2	True
IndivQLearningParticleDNN/233_23_3	none		True	-10	False	ParticleMomentum	False	False	10	-30	Individual_Deep_Q	1.0	simple_mlp	False	0.05	2500000	3	True
IndivQLearningParticleDNN/234_23_4	none		True	-10	False	ParticleMomentum	False	False	10	-30	Individual_Deep_Q	1.0	simple_mlp	False	0.05	2500000	4	True
IndivQLearningParticleDNN/235_23_5	none		True	-10	False	ParticleMomentum	False	False	10	-30	Individual_Deep_Q	1.0	simple_mlp	False	0.05	2500000	5	True
IndivQLearningParticleDNN/236_23_6	none		True	-10	False	ParticleMomentum	False	False	10	-30	Individual_Deep_Q	1.0	simple_mlp	False	0.05	2500000	6	True
IndivQLearningParticleDNN/237_23_7	none		True	-10	False	ParticleMomentum	False	False	10	-30	Individual_Deep_Q	1.0	simple_mlp	False	0.05	2500000	7	True
IndivQLearningParticleDNN/238_23_8	none		True	-10	False	ParticleMomentum	False	False	10	-30	Individual_Deep_Q	1.0	simple_mlp	False	0.05	2500000	8	True
IndivQLearningParticleDNN/239_23_9	none		True	-10	False	ParticleMomentum	False	False	10	-30	Individual_Deep_Q	1.0	simple_mlp	False	0.05	2500000	9	True
