# Supplementary material
Source: ML conference proceedings conference paper supplement (https://proceedings.neurips.cc/paper_files/paper/2022/hash/57444e14ecd9e2c8f603b4f012ce3811-Abstract.html)
Supplement: Supplementary file 1 [file 57444e14ecd9e2c8f603b4f012ce3811-Supplemental-Conference.zip › 3410_shield_decentralization_for_sa-Supplementary Material/parallel_configs/IndivQLearningParticleEval.csv]

run_name	shield	shield_specification	punish_unsafe_orig_action	punish_unsafe_orig_action_modifier	randomize_starts	map_type	particle_agents_observe_momentum	particle_terminate_on_collision	particle_world_size	particle_collision_penalty	learner_type	learner_anneal_eps_start	learner_anneal_eps_finish	max_total_steps	seed	skip_training	evaluation_run_name	evaluation_shield	evaluation_shield_specification	learner_evaluation_epsilon
IndivQLearningParticle/0_0_0	slugs_centralized	shields/momentum_shield	True	-10	True	ParticleMomentum	True	False	10	-30	Individual_Q	1.0	0.05	2500000	0	True	IndivQLearningParticle/0_0_0_slugs_centralized	slugs_centralized	shields/momentum_shield	0.05
IndivQLearningParticle/0_0_0	slugs_centralized	shields/momentum_shield	True	-10	True	ParticleMomentum	True	False	10	-30	Individual_Q	1.0	0.05	2500000	0	True	IndivQLearningParticle/0_0_0_slugs_decentralized	slugs_decentralized	shields/momentum_shield	0.05
IndivQLearningParticle/0_0_0	slugs_centralized	shields/momentum_shield	True	-10	True	ParticleMomentum	True	False	10	-30	Individual_Q	1.0	0.05	2500000	0	True	IndivQLearningParticle/0_0_0_none	none		0.05
IndivQLearningParticle/1_0_1	slugs_centralized	shields/momentum_shield	True	-10	True	ParticleMomentum	True	False	10	-30	Individual_Q	1.0	0.05	2500000	1	True	IndivQLearningParticle/1_0_1_slugs_centralized	slugs_centralized	shields/momentum_shield	0.05
IndivQLearningParticle/1_0_1	slugs_centralized	shields/momentum_shield	True	-10	True	ParticleMomentum	True	False	10	-30	Individual_Q	1.0	0.05	2500000	1	True	IndivQLearningParticle/1_0_1_slugs_decentralized	slugs_decentralized	shields/momentum_shield	0.05
IndivQLearningParticle/1_0_1	slugs_centralized	shields/momentum_shield	True	-10	True	ParticleMomentum	True	False	10	-30	Individual_Q	1.0	0.05	2500000	1	True	IndivQLearningParticle/1_0_1_none	none		0.05
IndivQLearningParticle/2_0_2	slugs_centralized	shields/momentum_shield	True	-10	True	ParticleMomentum	True	False	10	-30	Individual_Q	1.0	0.05	2500000	2	True	IndivQLearningParticle/2_0_2_slugs_centralized	slugs_centralized	shields/momentum_shield	0.05
IndivQLearningParticle/2_0_2	slugs_centralized	shields/momentum_shield	True	-10	True	ParticleMomentum	True	False	10	-30	Individual_Q	1.0	0.05	2500000	2	True	IndivQLearningParticle/2_0_2_slugs_decentralized	slugs_decentralized	shields/momentum_shield	0.05
IndivQLearningParticle/2_0_2	slugs_centralized	shields/momentum_shield	True	-10	True	ParticleMomentum	True	False	10	-30	Individual_Q	1.0	0.05	2500000	2	True	IndivQLearningParticle/2_0_2_none	none		0.05
IndivQLearningParticle/3_0_3	slugs_centralized	shields/momentum_shield	True	-10	True	ParticleMomentum	True	False	10	-30	Individual_Q	1.0	0.05	2500000	3	True	IndivQLearningParticle/3_0_3_slugs_centralized	slugs_centralized	shields/momentum_shield	0.05
IndivQLearningParticle/3_0_3	slugs_centralized	shields/momentum_shield	True	-10	True	ParticleMomentum	True	False	10	-30	Individual_Q	1.0	0.05	2500000	3	True	IndivQLearningParticle/3_0_3_slugs_decentralized	slugs_decentralized	shields/momentum_shield	0.05
IndivQLearningParticle/3_0_3	slugs_centralized	shields/momentum_shield	True	-10	True	ParticleMomentum	True	False	10	-30	Individual_Q	1.0	0.05	2500000	3	True	IndivQLearningParticle/3_0_3_none	none		0.05
IndivQLearningParticle/4_0_4	slugs_centralized	shields/momentum_shield	True	-10	True	ParticleMomentum	True	False	10	-30	Individual_Q	1.0	0.05	2500000	4	True	IndivQLearningParticle/4_0_4_slugs_centralized	slugs_centralized	shields/momentum_shield	0.05
IndivQLearningParticle/4_0_4	slugs_centralized	shields/momentum_shield	True	-10	True	ParticleMomentum	True	False	10	-30	Individual_Q	1.0	0.05	2500000	4	True	IndivQLearningParticle/4_0_4_slugs_decentralized	slugs_decentralized	shields/momentum_shield	0.05
IndivQLearningParticle/4_0_4	slugs_centralized	shields/momentum_shield	True	-10	True	ParticleMomentum	True	False	10	-30	Individual_Q	1.0	0.05	2500000	4	True	IndivQLearningParticle/4_0_4_none	none		0.05
IndivQLearningParticle/5_0_5	slugs_centralized	shields/momentum_shield	True	-10	True	ParticleMomentum	True	False	10	-30	Individual_Q	1.0	0.05	2500000	5	True	IndivQLearningParticle/5_0_5_slugs_centralized	slugs_centralized	shields/momentum_shield	0.05
IndivQLearningParticle/5_0_5	slugs_centralized	shields/momentum_shield	True	-10	True	ParticleMomentum	True	False	10	-30	Individual_Q	1.0	0.05	2500000	5	True	IndivQLearningParticle/5_0_5_slugs_decentralized	slugs_decentralized	shields/momentum_shield	0.05
IndivQLearningParticle/5_0_5	slugs_centralized	shields/momentum_shield	True	-10	True	ParticleMomentum	True	False	10	-30	Individual_Q	1.0	0.05	2500000	5	True	IndivQLearningParticle/5_0_5_none	none		0.05
IndivQLearningParticle/6_0_6	slugs_centralized	shields/momentum_shield	True	-10	True	ParticleMomentum	True	False	10	-30	Individual_Q	1.0	0.05	2500000	6	True	IndivQLearningParticle/6_0_6_slugs_centralized	slugs_centralized	shields/momentum_shield	0.05
IndivQLearningParticle/6_0_6	slugs_centralized	shields/momentum_shield	True	-10	True	ParticleMomentum	True	False	10	-30	Individual_Q	1.0	0.05	2500000	6	True	IndivQLearningParticle/6_0_6_slugs_decentralized	slugs_decentralized	shields/momentum_shield	0.05
IndivQLearningParticle/6_0_6	slugs_centralized	shields/momentum_shield	True	-10	True	ParticleMomentum	True	False	10	-30	Individual_Q	1.0	0.05	2500000	6	True	IndivQLearningParticle/6_0_6_none	none		0.05
IndivQLearningParticle/7_0_7	slugs_centralized	shields/momentum_shield	True	-10	True	ParticleMomentum	True	False	10	-30	Individual_Q	1.0	0.05	2500000	7	True	IndivQLearningParticle/7_0_7_slugs_centralized	slugs_centralized	shields/momentum_shield	0.05
IndivQLearningParticle/7_0_7	slugs_centralized	shields/momentum_shield	True	-10	True	ParticleMomentum	True	False	10	-30	Individual_Q	1.0	0.05	2500000	7	True	IndivQLearningParticle/7_0_7_slugs_decentralized	slugs_decentralized	shields/momentum_shield	0.05
IndivQLearningParticle/7_0_7	slugs_centralized	shields/momentum_shield	True	-10	True	ParticleMomentum	True	False	10	-30	Individual_Q	1.0	0.05	2500000	7	True	IndivQLearningParticle/7_0_7_none	none		0.05
IndivQLearningParticle/8_0_8	slugs_centralized	shields/momentum_shield	True	-10	True	ParticleMomentum	True	False	10	-30	Individual_Q	1.0	0.05	2500000	8	True	IndivQLearningParticle/8_0_8_slugs_centralized	slugs_centralized	shields/momentum_shield	0.05
IndivQLearningParticle/8_0_8	slugs_centralized	shields/momentum_shield	True	-10	True	ParticleMomentum	True	False	10	-30	Individual_Q	1.0	0.05	2500000	8	True	IndivQLearningParticle/8_0_8_slugs_decentralized	slugs_decentralized	shields/momentum_shield	0.05
IndivQLearningParticle/8_0_8	slugs_centralized	shields/momentum_shield	True	-10	True	ParticleMomentum	True	False	10	-30	Individual_Q	1.0	0.05	2500000	8	True	IndivQLearningParticle/8_0_8_none	none		0.05
IndivQLearningParticle/9_0_9	slugs_centralized	shields/momentum_shield	True	-10	True	ParticleMomentum	True	False	10	-30	Individual_Q	1.0	0.05	2500000	9	True	IndivQLearningParticle/9_0_9_slugs_centralized	slugs_centralized	shields/momentum_shield	0.05
IndivQLearningParticle/9_0_9	slugs_centralized	shields/momentum_shield	True	-10	True	ParticleMomentum	True	False	10	-30	Individual_Q	1.0	0.05	2500000	9	True	IndivQLearningParticle/9_0_9_slugs_decentralized	slugs_decentralized	shields/momentum_shield	0.05
IndivQLearningParticle/9_0_9	slugs_centralized	shields/momentum_shield	True	-10	True	ParticleMomentum	True	False	10	-30	Individual_Q	1.0	0.05	2500000	9	True	IndivQLearningParticle/9_0_9_none	none		0.05
IndivQLearningParticle/10_1_0	slugs_centralized	shields/momentum_shield	True	-10	True	ParticleMomentum	False	False	10	-30	Individual_Q	1.0	0.05	2500000	0	True	IndivQLearningParticle/10_1_0_slugs_centralized	slugs_centralized	shields/momentum_shield	0.05
IndivQLearningParticle/10_1_0	slugs_centralized	shields/momentum_shield	True	-10	True	ParticleMomentum	False	False	10	-30	Individual_Q	1.0	0.05	2500000	0	True	IndivQLearningParticle/10_1_0_slugs_decentralized	slugs_decentralized	shields/momentum_shield	0.05
IndivQLearningParticle/10_1_0	slugs_centralized	shields/momentum_shield	True	-10	True	ParticleMomentum	False	False	10	-30	Individual_Q	1.0	0.05	2500000	0	True	IndivQLearningParticle/10_1_0_none	none		0.05
IndivQLearningParticle/11_1_1	slugs_centralized	shields/momentum_shield	True	-10	True	ParticleMomentum	False	False	10	-30	Individual_Q	1.0	0.05	2500000	1	True	IndivQLearningParticle/11_1_1_slugs_centralized	slugs_centralized	shields/momentum_shield	0.05
IndivQLearningParticle/11_1_1	slugs_centralized	shields/momentum_shield	True	-10	True	ParticleMomentum	False	False	10	-30	Individual_Q	1.0	0.05	2500000	1	True	IndivQLearningParticle/11_1_1_slugs_decentralized	slugs_decentralized	shields/momentum_shield	0.05
IndivQLearningParticle/11_1_1	slugs_centralized	shields/momentum_shield	True	-10	True	ParticleMomentum	False	False	10	-30	Individual_Q	1.0	0.05	2500000	1	True	IndivQLearningParticle/11_1_1_none	none		0.05
IndivQLearningParticle/12_1_2	slugs_centralized	shields/momentum_shield	True	-10	True	ParticleMomentum	False	False	10	-30	Individual_Q	1.0	0.05	2500000	2	True	IndivQLearningParticle/12_1_2_slugs_centralized	slugs_centralized	shields/momentum_shield	0.05
IndivQLearningParticle/12_1_2	slugs_centralized	shields/momentum_shield	True	-10	True	ParticleMomentum	False	False	10	-30	Individual_Q	1.0	0.05	2500000	2	True	IndivQLearningParticle/12_1_2_slugs_decentralized	slugs_decentralized	shields/momentum_shield	0.05
IndivQLearningParticle/12_1_2	slugs_centralized	shields/momentum_shield	True	-10	True	ParticleMomentum	False	False	10	-30	Individual_Q	1.0	0.05	2500000	2	True	IndivQLearningParticle/12_1_2_none	none		0.05
IndivQLearningParticle/13_1_3	slugs_centralized	shields/momentum_shield	True	-10	True	ParticleMomentum	False	False	10	-30	Individual_Q	1.0	0.05	2500000	3	True	IndivQLearningParticle/13_1_3_slugs_centralized	slugs_centralized	shields/momentum_shield	0.05
IndivQLearningParticle/13_1_3	slugs_centralized	shields/momentum_shield	True	-10	True	ParticleMomentum	False	False	10	-30	Individual_Q	1.0	0.05	2500000	3	True	IndivQLearningParticle/13_1_3_slugs_decentralized	slugs_decentralized	shields/momentum_shield	0.05
IndivQLearningParticle/13_1_3	slugs_centralized	shields/momentum_shield	True	-10	True	ParticleMomentum	False	False	10	-30	Individual_Q	1.0	0.05	2500000	3	True	IndivQLearningParticle/13_1_3_none	none		0.05
IndivQLearningParticle/14_1_4	slugs_centralized	shields/momentum_shield	True	-10	True	ParticleMomentum	False	False	10	-30	Individual_Q	1.0	0.05	2500000	4	True	IndivQLearningParticle/14_1_4_slugs_centralized	slugs_centralized	shields/momentum_shield	0.05
IndivQLearningParticle/14_1_4	slugs_centralized	shields/momentum_shield	True	-10	True	ParticleMomentum	False	False	10	-30	Individual_Q	1.0	0.05	2500000	4	True	IndivQLearningParticle/14_1_4_slugs_decentralized	slugs_decentralized	shields/momentum_shield	0.05
IndivQLearningParticle/14_1_4	slugs_centralized	shields/momentum_shield	True	-10	True	ParticleMomentum	False	False	10	-30	Individual_Q	1.0	0.05	2500000	4	True	IndivQLearningParticle/14_1_4_none	none		0.05
IndivQLearningParticle/15_1_5	slugs_centralized	shields/momentum_shield	True	-10	True	ParticleMomentum	False	False	10	-30	Individual_Q	1.0	0.05	2500000	5	True	IndivQLearningParticle/15_1_5_slugs_centralized	slugs_centralized	shields/momentum_shield	0.05
IndivQLearningParticle/15_1_5	slugs_centralized	shields/momentum_shield	True	-10	True	ParticleMomentum	False	False	10	-30	Individual_Q	1.0	0.05	2500000	5	True	IndivQLearningParticle/15_1_5_slugs_decentralized	slugs_decentralized	shields/momentum_shield	0.05
IndivQLearningParticle/15_1_5	slugs_centralized	shields/momentum_shield	True	-10	True	ParticleMomentum	False	False	10	-30	Individual_Q	1.0	0.05	2500000	5	True	IndivQLearningParticle/15_1_5_none	none		0.05
IndivQLearningParticle/16_1_6	slugs_centralized	shields/momentum_shield	True	-10	True	ParticleMomentum	False	False	10	-30	Individual_Q	1.0	0.05	2500000	6	True	IndivQLearningParticle/16_1_6_slugs_centralized	slugs_centralized	shields/momentum_shield	0.05
IndivQLearningParticle/16_1_6	slugs_centralized	shields/momentum_shield	True	-10	True	ParticleMomentum	False	False	10	-30	Individual_Q	1.0	0.05	2500000	6	True	IndivQLearningParticle/16_1_6_slugs_decentralized	slugs_decentralized	shields/momentum_shield	0.05
IndivQLearningParticle/16_1_6	slugs_centralized	shields/momentum_shield	True	-10	True	ParticleMomentum	False	False	10	-30	Individual_Q	1.0	0.05	2500000	6	True	IndivQLearningParticle/16_1_6_none	none		0.05
IndivQLearningParticle/17_1_7	slugs_centralized	shields/momentum_shield	True	-10	True	ParticleMomentum	False	False	10	-30	Individual_Q	1.0	0.05	2500000	7	True	IndivQLearningParticle/17_1_7_slugs_centralized	slugs_centralized	shields/momentum_shield	0.05
IndivQLearningParticle/17_1_7	slugs_centralized	shields/momentum_shield	True	-10	True	ParticleMomentum	False	False	10	-30	Individual_Q	1.0	0.05	2500000	7	True	IndivQLearningParticle/17_1_7_slugs_decentralized	slugs_decentralized	shields/momentum_shield	0.05
IndivQLearningParticle/17_1_7	slugs_centralized	shields/momentum_shield	True	-10	True	ParticleMomentum	False	False	10	-30	Individual_Q	1.0	0.05	2500000	7	True	IndivQLearningParticle/17_1_7_none	none		0.05
IndivQLearningParticle/18_1_8	slugs_centralized	shields/momentum_shield	True	-10	True	ParticleMomentum	False	False	10	-30	Individual_Q	1.0	0.05	2500000	8	True	IndivQLearningParticle/18_1_8_slugs_centralized	slugs_centralized	shields/momentum_shield	0.05
IndivQLearningParticle/18_1_8	slugs_centralized	shields/momentum_shield	True	-10	True	ParticleMomentum	False	False	10	-30	Individual_Q	1.0	0.05	2500000	8	True	IndivQLearningParticle/18_1_8_slugs_decentralized	slugs_decentralized	shields/momentum_shield	0.05
IndivQLearningParticle/18_1_8	slugs_centralized	shields/momentum_shield	True	-10	True	ParticleMomentum	False	False	10	-30	Individual_Q	1.0	0.05	2500000	8	True	IndivQLearningParticle/18_1_8_none	none		0.05
IndivQLearningParticle/19_1_9	slugs_centralized	shields/momentum_shield	True	-10	True	ParticleMomentum	False	False	10	-30	Individual_Q	1.0	0.05	2500000	9	True	IndivQLearningParticle/19_1_9_slugs_centralized	slugs_centralized	shields/momentum_shield	0.05
IndivQLearningParticle/19_1_9	slugs_centralized	shields/momentum_shield	True	-10	True	ParticleMomentum	False	False	10	-30	Individual_Q	1.0	0.05	2500000	9	True	IndivQLearningParticle/19_1_9_slugs_decentralized	slugs_decentralized	shields/momentum_shield	0.05
IndivQLearningParticle/19_1_9	slugs_centralized	shields/momentum_shield	True	-10	True	ParticleMomentum	False	False	10	-30	Individual_Q	1.0	0.05	2500000	9	True	IndivQLearningParticle/19_1_9_none	none		0.05
IndivQLearningParticle/20_2_0	slugs_decentralized	shields/momentum_shield	True	-10	True	ParticleMomentum	True	False	10	-30	Individual_Q	1.0	0.05	2500000	0	True	IndivQLearningParticle/20_2_0_slugs_centralized	slugs_centralized	shields/momentum_shield	0.05
IndivQLearningParticle/20_2_0	slugs_decentralized	shields/momentum_shield	True	-10	True	ParticleMomentum	True	False	10	-30	Individual_Q	1.0	0.05	2500000	0	True	IndivQLearningParticle/20_2_0_slugs_decentralized	slugs_decentralized	shields/momentum_shield	0.05
IndivQLearningParticle/20_2_0	slugs_decentralized	shields/momentum_shield	True	-10	True	ParticleMomentum	True	False	10	-30	Individual_Q	1.0	0.05	2500000	0	True	IndivQLearningParticle/20_2_0_none	none		0.05
IndivQLearningParticle/21_2_1	slugs_decentralized	shields/momentum_shield	True	-10	True	ParticleMomentum	True	False	10	-30	Individual_Q	1.0	0.05	2500000	1	True	IndivQLearningParticle/21_2_1_slugs_centralized	slugs_centralized	shields/momentum_shield	0.05
IndivQLearningParticle/21_2_1	slugs_decentralized	shields/momentum_shield	True	-10	True	ParticleMomentum	True	False	10	-30	Individual_Q	1.0	0.05	2500000	1	True	IndivQLearningParticle/21_2_1_slugs_decentralized	slugs_decentralized	shields/momentum_shield	0.05
IndivQLearningParticle/21_2_1	slugs_decentralized	shields/momentum_shield	True	-10	True	ParticleMomentum	True	False	10	-30	Individual_Q	1.0	0.05	2500000	1	True	IndivQLearningParticle/21_2_1_none	none		0.05
IndivQLearningParticle/22_2_2	slugs_decentralized	shields/momentum_shield	True	-10	True	ParticleMomentum	True	False	10	-30	Individual_Q	1.0	0.05	2500000	2	True	IndivQLearningParticle/22_2_2_slugs_centralized	slugs_centralized	shields/momentum_shield	0.05
IndivQLearningParticle/22_2_2	slugs_decentralized	shields/momentum_shield	True	-10	True	ParticleMomentum	True	False	10	-30	Individual_Q	1.0	0.05	2500000	2	True	IndivQLearningParticle/22_2_2_slugs_decentralized	slugs_decentralized	shields/momentum_shield	0.05
IndivQLearningParticle/22_2_2	slugs_decentralized	shields/momentum_shield	True	-10	True	ParticleMomentum	True	False	10	-30	Individual_Q	1.0	0.05	2500000	2	True	IndivQLearningParticle/22_2_2_none	none		0.05
IndivQLearningParticle/23_2_3	slugs_decentralized	shields/momentum_shield	True	-10	True	ParticleMomentum	True	False	10	-30	Individual_Q	1.0	0.05	2500000	3	True	IndivQLearningParticle/23_2_3_slugs_centralized	slugs_centralized	shields/momentum_shield	0.05
IndivQLearningParticle/23_2_3	slugs_decentralized	shields/momentum_shield	True	-10	True	ParticleMomentum	True	False	10	-30	Individual_Q	1.0	0.05	2500000	3	True	IndivQLearningParticle/23_2_3_slugs_decentralized	slugs_decentralized	shields/momentum_shield	0.05
IndivQLearningParticle/23_2_3	slugs_decentralized	shields/momentum_shield	True	-10	True	ParticleMomentum	True	False	10	-30	Individual_Q	1.0	0.05	2500000	3	True	IndivQLearningParticle/23_2_3_none	none		0.05
IndivQLearningParticle/24_2_4	slugs_decentralized	shields/momentum_shield	True	-10	True	ParticleMomentum	True	False	10	-30	Individual_Q	1.0	0.05	2500000	4	True	IndivQLearningParticle/24_2_4_slugs_centralized	slugs_centralized	shields/momentum_shield	0.05
IndivQLearningParticle/24_2_4	slugs_decentralized	shields/momentum_shield	True	-10	True	ParticleMomentum	True	False	10	-30	Individual_Q	1.0	0.05	2500000	4	True	IndivQLearningParticle/24_2_4_slugs_decentralized	slugs_decentralized	shields/momentum_shield	0.05
IndivQLearningParticle/24_2_4	slugs_decentralized	shields/momentum_shield	True	-10	True	ParticleMomentum	True	False	10	-30	Individual_Q	1.0	0.05	2500000	4	True	IndivQLearningParticle/24_2_4_none	none		0.05
IndivQLearningParticle/25_2_5	slugs_decentralized	shields/momentum_shield	True	-10	True	ParticleMomentum	True	False	10	-30	Individual_Q	1.0	0.05	2500000	5	True	IndivQLearningParticle/25_2_5_slugs_centralized	slugs_centralized	shields/momentum_shield	0.05
IndivQLearningParticle/25_2_5	slugs_decentralized	shields/momentum_shield	True	-10	True	ParticleMomentum	True	False	10	-30	Individual_Q	1.0	0.05	2500000	5	True	IndivQLearningParticle/25_2_5_slugs_decentralized	slugs_decentralized	shields/momentum_shield	0.05
IndivQLearningParticle/25_2_5	slugs_decentralized	shields/momentum_shield	True	-10	True	ParticleMomentum	True	False	10	-30	Individual_Q	1.0	0.05	2500000	5	True	IndivQLearningParticle/25_2_5_none	none		0.05
IndivQLearningParticle/26_2_6	slugs_decentralized	shields/momentum_shield	True	-10	True	ParticleMomentum	True	False	10	-30	Individual_Q	1.0	0.05	2500000	6	True	IndivQLearningParticle/26_2_6_slugs_centralized	slugs_centralized	shields/momentum_shield	0.05
IndivQLearningParticle/26_2_6	slugs_decentralized	shields/momentum_shield	True	-10	True	ParticleMomentum	True	False	10	-30	Individual_Q	1.0	0.05	2500000	6	True	IndivQLearningParticle/26_2_6_slugs_decentralized	slugs_decentralized	shields/momentum_shield	0.05
IndivQLearningParticle/26_2_6	slugs_decentralized	shields/momentum_shield	True	-10	True	ParticleMomentum	True	False	10	-30	Individual_Q	1.0	0.05	2500000	6	True	IndivQLearningParticle/26_2_6_none	none		0.05
IndivQLearningParticle/27_2_7	slugs_decentralized	shields/momentum_shield	True	-10	True	ParticleMomentum	True	False	10	-30	Individual_Q	1.0	0.05	2500000	7	True	IndivQLearningParticle/27_2_7_slugs_centralized	slugs_centralized	shields/momentum_shield	0.05
IndivQLearningParticle/27_2_7	slugs_decentralized	shields/momentum_shield	True	-10	True	ParticleMomentum	True	False	10	-30	Individual_Q	1.0	0.05	2500000	7	True	IndivQLearningParticle/27_2_7_slugs_decentralized	slugs_decentralized	shields/momentum_shield	0.05
IndivQLearningParticle/27_2_7	slugs_decentralized	shields/momentum_shield	True	-10	True	ParticleMomentum	True	False	10	-30	Individual_Q	1.0	0.05	2500000	7	True	IndivQLearningParticle/27_2_7_none	none		0.05
IndivQLearningParticle/28_2_8	slugs_decentralized	shields/momentum_shield	True	-10	True	ParticleMomentum	True	False	10	-30	Individual_Q	1.0	0.05	2500000	8	True	IndivQLearningParticle/28_2_8_slugs_centralized	slugs_centralized	shields/momentum_shield	0.05
IndivQLearningParticle/28_2_8	slugs_decentralized	shields/momentum_shield	True	-10	True	ParticleMomentum	True	False	10	-30	Individual_Q	1.0	0.05	2500000	8	True	IndivQLearningParticle/28_2_8_slugs_decentralized	slugs_decentralized	shields/momentum_shield	0.05
IndivQLearningParticle/28_2_8	slugs_decentralized	shields/momentum_shield	True	-10	True	ParticleMomentum	True	False	10	-30	Individual_Q	1.0	0.05	2500000	8	True	IndivQLearningParticle/28_2_8_none	none		0.05
IndivQLearningParticle/29_2_9	slugs_decentralized	shields/momentum_shield	True	-10	True	ParticleMomentum	True	False	10	-30	Individual_Q	1.0	0.05	2500000	9	True	IndivQLearningParticle/29_2_9_slugs_centralized	slugs_centralized	shields/momentum_shield	0.05
IndivQLearningParticle/29_2_9	slugs_decentralized	shields/momentum_shield	True	-10	True	ParticleMomentum	True	False	10	-30	Individual_Q	1.0	0.05	2500000	9	True	IndivQLearningParticle/29_2_9_slugs_decentralized	slugs_decentralized	shields/momentum_shield	0.05
IndivQLearningParticle/29_2_9	slugs_decentralized	shields/momentum_shield	True	-10	True	ParticleMomentum	True	False	10	-30	Individual_Q	1.0	0.05	2500000	9	True	IndivQLearningParticle/29_2_9_none	none		0.05
IndivQLearningParticle/30_3_0	slugs_decentralized	shields/momentum_shield	True	-10	True	ParticleMomentum	False	False	10	-30	Individual_Q	1.0	0.05	2500000	0	True	IndivQLearningParticle/30_3_0_slugs_centralized	slugs_centralized	shields/momentum_shield	0.05
IndivQLearningParticle/30_3_0	slugs_decentralized	shields/momentum_shield	True	-10	True	ParticleMomentum	False	False	10	-30	Individual_Q	1.0	0.05	2500000	0	True	IndivQLearningParticle/30_3_0_slugs_decentralized	slugs_decentralized	shields/momentum_shield	0.05
IndivQLearningParticle/30_3_0	slugs_decentralized	shields/momentum_shield	True	-10	True	ParticleMomentum	False	False	10	-30	Individual_Q	1.0	0.05	2500000	0	True	IndivQLearningParticle/30_3_0_none	none		0.05
IndivQLearningParticle/31_3_1	slugs_decentralized	shields/momentum_shield	True	-10	True	ParticleMomentum	False	False	10	-30	Individual_Q	1.0	0.05	2500000	1	True	IndivQLearningParticle/31_3_1_slugs_centralized	slugs_centralized	shields/momentum_shield	0.05
IndivQLearningParticle/31_3_1	slugs_decentralized	shields/momentum_shield	True	-10	True	ParticleMomentum	False	False	10	-30	Individual_Q	1.0	0.05	2500000	1	True	IndivQLearningParticle/31_3_1_slugs_decentralized	slugs_decentralized	shields/momentum_shield	0.05
IndivQLearningParticle/31_3_1	slugs_decentralized	shields/momentum_shield	True	-10	True	ParticleMomentum	False	False	10	-30	Individual_Q	1.0	0.05	2500000	1	True	IndivQLearningParticle/31_3_1_none	none		0.05
IndivQLearningParticle/32_3_2	slugs_decentralized	shields/momentum_shield	True	-10	True	ParticleMomentum	False	False	10	-30	Individual_Q	1.0	0.05	2500000	2	True	IndivQLearningParticle/32_3_2_slugs_centralized	slugs_centralized	shields/momentum_shield	0.05
IndivQLearningParticle/32_3_2	slugs_decentralized	shields/momentum_shield	True	-10	True	ParticleMomentum	False	False	10	-30	Individual_Q	1.0	0.05	2500000	2	True	IndivQLearningParticle/32_3_2_slugs_decentralized	slugs_decentralized	shields/momentum_shield	0.05
IndivQLearningParticle/32_3_2	slugs_decentralized	shields/momentum_shield	True	-10	True	ParticleMomentum	False	False	10	-30	Individual_Q	1.0	0.05	2500000	2	True	IndivQLearningParticle/32_3_2_none	none		0.05
IndivQLearningParticle/33_3_3	slugs_decentralized	shields/momentum_shield	True	-10	True	ParticleMomentum	False	False	10	-30	Individual_Q	1.0	0.05	2500000	3	True	IndivQLearningParticle/33_3_3_slugs_centralized	slugs_centralized	shields/momentum_shield	0.05
IndivQLearningParticle/33_3_3	slugs_decentralized	shields/momentum_shield	True	-10	True	ParticleMomentum	False	False	10	-30	Individual_Q	1.0	0.05	2500000	3	True	IndivQLearningParticle/33_3_3_slugs_decentralized	slugs_decentralized	shields/momentum_shield	0.05
IndivQLearningParticle/33_3_3	slugs_decentralized	shields/momentum_shield	True	-10	True	ParticleMomentum	False	False	10	-30	Individual_Q	1.0	0.05	2500000	3	True	IndivQLearningParticle/33_3_3_none	none		0.05
IndivQLearningParticle/34_3_4	slugs_decentralized	shields/momentum_shield	True	-10	True	ParticleMomentum	False	False	10	-30	Individual_Q	1.0	0.05	2500000	4	True	IndivQLearningParticle/34_3_4_slugs_centralized	slugs_centralized	shields/momentum_shield	0.05
IndivQLearningParticle/34_3_4	slugs_decentralized	shields/momentum_shield	True	-10	True	ParticleMomentum	False	False	10	-30	Individual_Q	1.0	0.05	2500000	4	True	IndivQLearningParticle/34_3_4_slugs_decentralized	slugs_decentralized	shields/momentum_shield	0.05
IndivQLearningParticle/34_3_4	slugs_decentralized	shields/momentum_shield	True	-10	True	ParticleMomentum	False	False	10	-30	Individual_Q	1.0	0.05	2500000	4	True	IndivQLearningParticle/34_3_4_none	none		0.05
IndivQLearningParticle/35_3_5	slugs_decentralized	shields/momentum_shield	True	-10	True	ParticleMomentum	False	False	10	-30	Individual_Q	1.0	0.05	2500000	5	True	IndivQLearningParticle/35_3_5_slugs_centralized	slugs_centralized	shields/momentum_shield	0.05
IndivQLearningParticle/35_3_5	slugs_decentralized	shields/momentum_shield	True	-10	True	ParticleMomentum	False	False	10	-30	Individual_Q	1.0	0.05	2500000	5	True	IndivQLearningParticle/35_3_5_slugs_decentralized	slugs_decentralized	shields/momentum_shield	0.05
IndivQLearningParticle/35_3_5	slugs_decentralized	shields/momentum_shield	True	-10	True	ParticleMomentum	False	False	10	-30	Individual_Q	1.0	0.05	2500000	5	True	IndivQLearningParticle/35_3_5_none	none		0.05
IndivQLearningParticle/36_3_6	slugs_decentralized	shields/momentum_shield	True	-10	True	ParticleMomentum	False	False	10	-30	Individual_Q	1.0	0.05	2500000	6	True	IndivQLearningParticle/36_3_6_slugs_centralized	slugs_centralized	shields/momentum_shield	0.05
IndivQLearningParticle/36_3_6	slugs_decentralized	shields/momentum_shield	True	-10	True	ParticleMomentum	False	False	10	-30	Individual_Q	1.0	0.05	2500000	6	True	IndivQLearningParticle/36_3_6_slugs_decentralized	slugs_decentralized	shields/momentum_shield	0.05
IndivQLearningParticle/36_3_6	slugs_decentralized	shields/momentum_shield	True	-10	True	ParticleMomentum	False	False	10	-30	Individual_Q	1.0	0.05	2500000	6	True	IndivQLearningParticle/36_3_6_none	none		0.05
IndivQLearningParticle/37_3_7	slugs_decentralized	shields/momentum_shield	True	-10	True	ParticleMomentum	False	False	10	-30	Individual_Q	1.0	0.05	2500000	7	True	IndivQLearningParticle/37_3_7_slugs_centralized	slugs_centralized	shields/momentum_shield	0.05
IndivQLearningParticle/37_3_7	slugs_decentralized	shields/momentum_shield	True	-10	True	ParticleMomentum	False	False	10	-30	Individual_Q	1.0	0.05	2500000	7	True	IndivQLearningParticle/37_3_7_slugs_decentralized	slugs_decentralized	shields/momentum_shield	0.05
IndivQLearningParticle/37_3_7	slugs_decentralized	shields/momentum_shield	True	-10	True	ParticleMomentum	False	False	10	-30	Individual_Q	1.0	0.05	2500000	7	True	IndivQLearningParticle/37_3_7_none	none		0.05
IndivQLearningParticle/38_3_8	slugs_decentralized	shields/momentum_shield	True	-10	True	ParticleMomentum	False	False	10	-30	Individual_Q	1.0	0.05	2500000	8	True	IndivQLearningParticle/38_3_8_slugs_centralized	slugs_centralized	shields/momentum_shield	0.05
IndivQLearningParticle/38_3_8	slugs_decentralized	shields/momentum_shield	True	-10	True	ParticleMomentum	False	False	10	-30	Individual_Q	1.0	0.05	2500000	8	True	IndivQLearningParticle/38_3_8_slugs_decentralized	slugs_decentralized	shields/momentum_shield	0.05
IndivQLearningParticle/38_3_8	slugs_decentralized	shields/momentum_shield	True	-10	True	ParticleMomentum	False	False	10	-30	Individual_Q	1.0	0.05	2500000	8	True	IndivQLearningParticle/38_3_8_none	none		0.05
IndivQLearningParticle/39_3_9	slugs_decentralized	shields/momentum_shield	True	-10	True	ParticleMomentum	False	False	10	-30	Individual_Q	1.0	0.05	2500000	9	True	IndivQLearningParticle/39_3_9_slugs_centralized	slugs_centralized	shields/momentum_shield	0.05
IndivQLearningParticle/39_3_9	slugs_decentralized	shields/momentum_shield	True	-10	True	ParticleMomentum	False	False	10	-30	Individual_Q	1.0	0.05	2500000	9	True	IndivQLearningParticle/39_3_9_slugs_decentralized	slugs_decentralized	shields/momentum_shield	0.05
IndivQLearningParticle/39_3_9	slugs_decentralized	shields/momentum_shield	True	-10	True	ParticleMomentum	False	False	10	-30	Individual_Q	1.0	0.05	2500000	9	True	IndivQLearningParticle/39_3_9_none	none		0.05
IndivQLearningParticle/40_4_0	none		True	-10	True	ParticleMomentum	True	False	10	-30	Individual_Q	1.0	0.05	2500000	0	True	IndivQLearningParticle/40_4_0_slugs_centralized	slugs_centralized	shields/momentum_shield	0.05
IndivQLearningParticle/40_4_0	none		True	-10	True	ParticleMomentum	True	False	10	-30	Individual_Q	1.0	0.05	2500000	0	True	IndivQLearningParticle/40_4_0_slugs_decentralized	slugs_decentralized	shields/momentum_shield	0.05
IndivQLearningParticle/40_4_0	none		True	-10	True	ParticleMomentum	True	False	10	-30	Individual_Q	1.0	0.05	2500000	0	True	IndivQLearningParticle/40_4_0_none	none		0.05
IndivQLearningParticle/41_4_1	none		True	-10	True	ParticleMomentum	True	False	10	-30	Individual_Q	1.0	0.05	2500000	1	True	IndivQLearningParticle/41_4_1_slugs_centralized	slugs_centralized	shields/momentum_shield	0.05
IndivQLearningParticle/41_4_1	none		True	-10	True	ParticleMomentum	True	False	10	-30	Individual_Q	1.0	0.05	2500000	1	True	IndivQLearningParticle/41_4_1_slugs_decentralized	slugs_decentralized	shields/momentum_shield	0.05
IndivQLearningParticle/41_4_1	none		True	-10	True	ParticleMomentum	True	False	10	-30	Individual_Q	1.0	0.05	2500000	1	True	IndivQLearningParticle/41_4_1_none	none		0.05
IndivQLearningParticle/42_4_2	none		True	-10	True	ParticleMomentum	True	False	10	-30	Individual_Q	1.0	0.05	2500000	2	True	IndivQLearningParticle/42_4_2_slugs_centralized	slugs_centralized	shields/momentum_shield	0.05
IndivQLearningParticle/42_4_2	none		True	-10	True	ParticleMomentum	True	False	10	-30	Individual_Q	1.0	0.05	2500000	2	True	IndivQLearningParticle/42_4_2_slugs_decentralized	slugs_decentralized	shields/momentum_shield	0.05
IndivQLearningParticle/42_4_2	none		True	-10	True	ParticleMomentum	True	False	10	-30	Individual_Q	1.0	0.05	2500000	2	True	IndivQLearningParticle/42_4_2_none	none		0.05
IndivQLearningParticle/43_4_3	none		True	-10	True	ParticleMomentum	True	False	10	-30	Individual_Q	1.0	0.05	2500000	3	True	IndivQLearningParticle/43_4_3_slugs_centralized	slugs_centralized	shields/momentum_shield	0.05
IndivQLearningParticle/43_4_3	none		True	-10	True	ParticleMomentum	True	False	10	-30	Individual_Q	1.0	0.05	2500000	3	True	IndivQLearningParticle/43_4_3_slugs_decentralized	slugs_decentralized	shields/momentum_shield	0.05
IndivQLearningParticle/43_4_3	none		True	-10	True	ParticleMomentum	True	False	10	-30	Individual_Q	1.0	0.05	2500000	3	True	IndivQLearningParticle/43_4_3_none	none		0.05
IndivQLearningParticle/44_4_4	none		True	-10	True	ParticleMomentum	True	False	10	-30	Individual_Q	1.0	0.05	2500000	4	True	IndivQLearningParticle/44_4_4_slugs_centralized	slugs_centralized	shields/momentum_shield	0.05
IndivQLearningParticle/44_4_4	none		True	-10	True	ParticleMomentum	True	False	10	-30	Individual_Q	1.0	0.05	2500000	4	True	IndivQLearningParticle/44_4_4_slugs_decentralized	slugs_decentralized	shields/momentum_shield	0.05
IndivQLearningParticle/44_4_4	none		True	-10	True	ParticleMomentum	True	False	10	-30	Individual_Q	1.0	0.05	2500000	4	True	IndivQLearningParticle/44_4_4_none	none		0.05
IndivQLearningParticle/45_4_5	none		True	-10	True	ParticleMomentum	True	False	10	-30	Individual_Q	1.0	0.05	2500000	5	True	IndivQLearningParticle/45_4_5_slugs_centralized	slugs_centralized	shields/momentum_shield	0.05
IndivQLearningParticle/45_4_5	none		True	-10	True	ParticleMomentum	True	False	10	-30	Individual_Q	1.0	0.05	2500000	5	True	IndivQLearningParticle/45_4_5_slugs_decentralized	slugs_decentralized	shields/momentum_shield	0.05
IndivQLearningParticle/45_4_5	none		True	-10	True	ParticleMomentum	True	False	10	-30	Individual_Q	1.0	0.05	2500000	5	True	IndivQLearningParticle/45_4_5_none	none		0.05
IndivQLearningParticle/46_4_6	none		True	-10	True	ParticleMomentum	True	False	10	-30	Individual_Q	1.0	0.05	2500000	6	True	IndivQLearningParticle/46_4_6_slugs_centralized	slugs_centralized	shields/momentum_shield	0.05
IndivQLearningParticle/46_4_6	none		True	-10	True	ParticleMomentum	True	False	10	-30	Individual_Q	1.0	0.05	2500000	6	True	IndivQLearningParticle/46_4_6_slugs_decentralized	slugs_decentralized	shields/momentum_shield	0.05
IndivQLearningParticle/46_4_6	none		True	-10	True	ParticleMomentum	True	False	10	-30	Individual_Q	1.0	0.05	2500000	6	True	IndivQLearningParticle/46_4_6_none	none		0.05
IndivQLearningParticle/47_4_7	none		True	-10	True	ParticleMomentum	True	False	10	-30	Individual_Q	1.0	0.05	2500000	7	True	IndivQLearningParticle/47_4_7_slugs_centralized	slugs_centralized	shields/momentum_shield	0.05
IndivQLearningParticle/47_4_7	none		True	-10	True	ParticleMomentum	True	False	10	-30	Individual_Q	1.0	0.05	2500000	7	True	IndivQLearningParticle/47_4_7_slugs_decentralized	slugs_decentralized	shields/momentum_shield	0.05
IndivQLearningParticle/47_4_7	none		True	-10	True	ParticleMomentum	True	False	10	-30	Individual_Q	1.0	0.05	2500000	7	True	IndivQLearningParticle/47_4_7_none	none		0.05
IndivQLearningParticle/48_4_8	none		True	-10	True	ParticleMomentum	True	False	10	-30	Individual_Q	1.0	0.05	2500000	8	True	IndivQLearningParticle/48_4_8_slugs_centralized	slugs_centralized	shields/momentum_shield	0.05
IndivQLearningParticle/48_4_8	none		True	-10	True	ParticleMomentum	True	False	10	-30	Individual_Q	1.0	0.05	2500000	8	True	IndivQLearningParticle/48_4_8_slugs_decentralized	slugs_decentralized	shields/momentum_shield	0.05
IndivQLearningParticle/48_4_8	none		True	-10	True	ParticleMomentum	True	False	10	-30	Individual_Q	1.0	0.05	2500000	8	True	IndivQLearningParticle/48_4_8_none	none		0.05
IndivQLearningParticle/49_4_9	none		True	-10	True	ParticleMomentum	True	False	10	-30	Individual_Q	1.0	0.05	2500000	9	True	IndivQLearningParticle/49_4_9_slugs_centralized	slugs_centralized	shields/momentum_shield	0.05
IndivQLearningParticle/49_4_9	none		True	-10	True	ParticleMomentum	True	False	10	-30	Individual_Q	1.0	0.05	2500000	9	True	IndivQLearningParticle/49_4_9_slugs_decentralized	slugs_decentralized	shields/momentum_shield	0.05
IndivQLearningParticle/49_4_9	none		True	-10	True	ParticleMomentum	True	False	10	-30	Individual_Q	1.0	0.05	2500000	9	True	IndivQLearningParticle/49_4_9_none	none		0.05
IndivQLearningParticle/50_5_0	none		True	-10	True	ParticleMomentum	False	False	10	-30	Individual_Q	1.0	0.05	2500000	0	True	IndivQLearningParticle/50_5_0_slugs_centralized	slugs_centralized	shields/momentum_shield	0.05
IndivQLearningParticle/50_5_0	none		True	-10	True	ParticleMomentum	False	False	10	-30	Individual_Q	1.0	0.05	2500000	0	True	IndivQLearningParticle/50_5_0_slugs_decentralized	slugs_decentralized	shields/momentum_shield	0.05
IndivQLearningParticle/50_5_0	none		True	-10	True	ParticleMomentum	False	False	10	-30	Individual_Q	1.0	0.05	2500000	0	True	IndivQLearningParticle/50_5_0_none	none		0.05
IndivQLearningParticle/51_5_1	none		True	-10	True	ParticleMomentum	False	False	10	-30	Individual_Q	1.0	0.05	2500000	1	True	IndivQLearningParticle/51_5_1_slugs_centralized	slugs_centralized	shields/momentum_shield	0.05
IndivQLearningParticle/51_5_1	none		True	-10	True	ParticleMomentum	False	False	10	-30	Individual_Q	1.0	0.05	2500000	1	True	IndivQLearningParticle/51_5_1_slugs_decentralized	slugs_decentralized	shields/momentum_shield	0.05
IndivQLearningParticle/51_5_1	none		True	-10	True	ParticleMomentum	False	False	10	-30	Individual_Q	1.0	0.05	2500000	1	True	IndivQLearningParticle/51_5_1_none	none		0.05
IndivQLearningParticle/52_5_2	none		True	-10	True	ParticleMomentum	False	False	10	-30	Individual_Q	1.0	0.05	2500000	2	True	IndivQLearningParticle/52_5_2_slugs_centralized	slugs_centralized	shields/momentum_shield	0.05
IndivQLearningParticle/52_5_2	none		True	-10	True	ParticleMomentum	False	False	10	-30	Individual_Q	1.0	0.05	2500000	2	True	IndivQLearningParticle/52_5_2_slugs_decentralized	slugs_decentralized	shields/momentum_shield	0.05
IndivQLearningParticle/52_5_2	none		True	-10	True	ParticleMomentum	False	False	10	-30	Individual_Q	1.0	0.05	2500000	2	True	IndivQLearningParticle/52_5_2_none	none		0.05
IndivQLearningParticle/53_5_3	none		True	-10	True	ParticleMomentum	False	False	10	-30	Individual_Q	1.0	0.05	2500000	3	True	IndivQLearningParticle/53_5_3_slugs_centralized	slugs_centralized	shields/momentum_shield	0.05
IndivQLearningParticle/53_5_3	none		True	-10	True	ParticleMomentum	False	False	10	-30	Individual_Q	1.0	0.05	2500000	3	True	IndivQLearningParticle/53_5_3_slugs_decentralized	slugs_decentralized	shields/momentum_shield	0.05
IndivQLearningParticle/53_5_3	none		True	-10	True	ParticleMomentum	False	False	10	-30	Individual_Q	1.0	0.05	2500000	3	True	IndivQLearningParticle/53_5_3_none	none		0.05
IndivQLearningParticle/54_5_4	none		True	-10	True	ParticleMomentum	False	False	10	-30	Individual_Q	1.0	0.05	2500000	4	True	IndivQLearningParticle/54_5_4_slugs_centralized	slugs_centralized	shields/momentum_shield	0.05
IndivQLearningParticle/54_5_4	none		True	-10	True	ParticleMomentum	False	False	10	-30	Individual_Q	1.0	0.05	2500000	4	True	IndivQLearningParticle/54_5_4_slugs_decentralized	slugs_decentralized	shields/momentum_shield	0.05
IndivQLearningParticle/54_5_4	none		True	-10	True	ParticleMomentum	False	False	10	-30	Individual_Q	1.0	0.05	2500000	4	True	IndivQLearningParticle/54_5_4_none	none		0.05
IndivQLearningParticle/55_5_5	none		True	-10	True	ParticleMomentum	False	False	10	-30	Individual_Q	1.0	0.05	2500000	5	True	IndivQLearningParticle/55_5_5_slugs_centralized	slugs_centralized	shields/momentum_shield	0.05
IndivQLearningParticle/55_5_5	none		True	-10	True	ParticleMomentum	False	False	10	-30	Individual_Q	1.0	0.05	2500000	5	True	IndivQLearningParticle/55_5_5_slugs_decentralized	slugs_decentralized	shields/momentum_shield	0.05
IndivQLearningParticle/55_5_5	none		True	-10	True	ParticleMomentum	False	False	10	-30	Individual_Q	1.0	0.05	2500000	5	True	IndivQLearningParticle/55_5_5_none	none		0.05
IndivQLearningParticle/56_5_6	none		True	-10	True	ParticleMomentum	False	False	10	-30	Individual_Q	1.0	0.05	2500000	6	True	IndivQLearningParticle/56_5_6_slugs_centralized	slugs_centralized	shields/momentum_shield	0.05
IndivQLearningParticle/56_5_6	none		True	-10	True	ParticleMomentum	False	False	10	-30	Individual_Q	1.0	0.05	2500000	6	True	IndivQLearningParticle/56_5_6_slugs_decentralized	slugs_decentralized	shields/momentum_shield	0.05
IndivQLearningParticle/56_5_6	none		True	-10	True	ParticleMomentum	False	False	10	-30	Individual_Q	1.0	0.05	2500000	6	True	IndivQLearningParticle/56_5_6_none	none		0.05
IndivQLearningParticle/57_5_7	none		True	-10	True	ParticleMomentum	False	False	10	-30	Individual_Q	1.0	0.05	2500000	7	True	IndivQLearningParticle/57_5_7_slugs_centralized	slugs_centralized	shields/momentum_shield	0.05
IndivQLearningParticle/57_5_7	none		True	-10	True	ParticleMomentum	False	False	10	-30	Individual_Q	1.0	0.05	2500000	7	True	IndivQLearningParticle/57_5_7_slugs_decentralized	slugs_decentralized	shields/momentum_shield	0.05
IndivQLearningParticle/57_5_7	none		True	-10	True	ParticleMomentum	False	False	10	-30	Individual_Q	1.0	0.05	2500000	7	True	IndivQLearningParticle/57_5_7_none	none		0.05
IndivQLearningParticle/58_5_8	none		True	-10	True	ParticleMomentum	False	False	10	-30	Individual_Q	1.0	0.05	2500000	8	True	IndivQLearningParticle/58_5_8_slugs_centralized	slugs_centralized	shields/momentum_shield	0.05
IndivQLearningParticle/58_5_8	none		True	-10	True	ParticleMomentum	False	False	10	-30	Individual_Q	1.0	0.05	2500000	8	True	IndivQLearningParticle/58_5_8_slugs_decentralized	slugs_decentralized	shields/momentum_shield	0.05
IndivQLearningParticle/58_5_8	none		True	-10	True	ParticleMomentum	False	False	10	-30	Individual_Q	1.0	0.05	2500000	8	True	IndivQLearningParticle/58_5_8_none	none		0.05
IndivQLearningParticle/59_5_9	none		True	-10	True	ParticleMomentum	False	False	10	-30	Individual_Q	1.0	0.05	2500000	9	True	IndivQLearningParticle/59_5_9_slugs_centralized	slugs_centralized	shields/momentum_shield	0.05
IndivQLearningParticle/59_5_9	none		True	-10	True	ParticleMomentum	False	False	10	-30	Individual_Q	1.0	0.05	2500000	9	True	IndivQLearningParticle/59_5_9_slugs_decentralized	slugs_decentralized	shields/momentum_shield	0.05
IndivQLearningParticle/59_5_9	none		True	-10	True	ParticleMomentum	False	False	10	-30	Individual_Q	1.0	0.05	2500000	9	True	IndivQLearningParticle/59_5_9_none	none		0.05
IndivQLearningParticle/60_6_0	slugs_centralized	shields/momentum_shield	True	-10	False	ParticleMomentum	True	False	10	-30	Individual_Q	1.0	0.05	2500000	0	True	IndivQLearningParticle/60_6_0_slugs_centralized	slugs_centralized	shields/momentum_shield	0.05
IndivQLearningParticle/60_6_0	slugs_centralized	shields/momentum_shield	True	-10	False	ParticleMomentum	True	False	10	-30	Individual_Q	1.0	0.05	2500000	0	True	IndivQLearningParticle/60_6_0_slugs_decentralized	slugs_decentralized	shields/momentum_shield	0.05
IndivQLearningParticle/60_6_0	slugs_centralized	shields/momentum_shield	True	-10	False	ParticleMomentum	True	False	10	-30	Individual_Q	1.0	0.05	2500000	0	True	IndivQLearningParticle/60_6_0_none	none		0.05
IndivQLearningParticle/61_6_1	slugs_centralized	shields/momentum_shield	True	-10	False	ParticleMomentum	True	False	10	-30	Individual_Q	1.0	0.05	2500000	1	True	IndivQLearningParticle/61_6_1_slugs_centralized	slugs_centralized	shields/momentum_shield	0.05
IndivQLearningParticle/61_6_1	slugs_centralized	shields/momentum_shield	True	-10	False	ParticleMomentum	True	False	10	-30	Individual_Q	1.0	0.05	2500000	1	True	IndivQLearningParticle/61_6_1_slugs_decentralized	slugs_decentralized	shields/momentum_shield	0.05
IndivQLearningParticle/61_6_1	slugs_centralized	shields/momentum_shield	True	-10	False	ParticleMomentum	True	False	10	-30	Individual_Q	1.0	0.05	2500000	1	True	IndivQLearningParticle/61_6_1_none	none		0.05
IndivQLearningParticle/62_6_2	slugs_centralized	shields/momentum_shield	True	-10	False	ParticleMomentum	True	False	10	-30	Individual_Q	1.0	0.05	2500000	2	True	IndivQLearningParticle/62_6_2_slugs_centralized	slugs_centralized	shields/momentum_shield	0.05
IndivQLearningParticle/62_6_2	slugs_centralized	shields/momentum_shield	True	-10	False	ParticleMomentum	True	False	10	-30	Individual_Q	1.0	0.05	2500000	2	True	IndivQLearningParticle/62_6_2_slugs_decentralized	slugs_decentralized	shields/momentum_shield	0.05
IndivQLearningParticle/62_6_2	slugs_centralized	shields/momentum_shield	True	-10	False	ParticleMomentum	True	False	10	-30	Individual_Q	1.0	0.05	2500000	2	True	IndivQLearningParticle/62_6_2_none	none		0.05
IndivQLearningParticle/63_6_3	slugs_centralized	shields/momentum_shield	True	-10	False	ParticleMomentum	True	False	10	-30	Individual_Q	1.0	0.05	2500000	3	True	IndivQLearningParticle/63_6_3_slugs_centralized	slugs_centralized	shields/momentum_shield	0.05
IndivQLearningParticle/63_6_3	slugs_centralized	shields/momentum_shield	True	-10	False	ParticleMomentum	True	False	10	-30	Individual_Q	1.0	0.05	2500000	3	True	IndivQLearningParticle/63_6_3_slugs_decentralized	slugs_decentralized	shields/momentum_shield	0.05
IndivQLearningParticle/63_6_3	slugs_centralized	shields/momentum_shield	True	-10	False	ParticleMomentum	True	False	10	-30	Individual_Q	1.0	0.05	2500000	3	True	IndivQLearningParticle/63_6_3_none	none		0.05
IndivQLearningParticle/64_6_4	slugs_centralized	shields/momentum_shield	True	-10	False	ParticleMomentum	True	False	10	-30	Individual_Q	1.0	0.05	2500000	4	True	IndivQLearningParticle/64_6_4_slugs_centralized	slugs_centralized	shields/momentum_shield	0.05
IndivQLearningParticle/64_6_4	slugs_centralized	shields/momentum_shield	True	-10	False	ParticleMomentum	True	False	10	-30	Individual_Q	1.0	0.05	2500000	4	True	IndivQLearningParticle/64_6_4_slugs_decentralized	slugs_decentralized	shields/momentum_shield	0.05
IndivQLearningParticle/64_6_4	slugs_centralized	shields/momentum_shield	True	-10	False	ParticleMomentum	True	False	10	-30	Individual_Q	1.0	0.05	2500000	4	True	IndivQLearningParticle/64_6_4_none	none		0.05
IndivQLearningParticle/65_6_5	slugs_centralized	shields/momentum_shield	True	-10	False	ParticleMomentum	True	False	10	-30	Individual_Q	1.0	0.05	2500000	5	True	IndivQLearningParticle/65_6_5_slugs_centralized	slugs_centralized	shields/momentum_shield	0.05
IndivQLearningParticle/65_6_5	slugs_centralized	shields/momentum_shield	True	-10	False	ParticleMomentum	True	False	10	-30	Individual_Q	1.0	0.05	2500000	5	True	IndivQLearningParticle/65_6_5_slugs_decentralized	slugs_decentralized	shields/momentum_shield	0.05
IndivQLearningParticle/65_6_5	slugs_centralized	shields/momentum_shield	True	-10	False	ParticleMomentum	True	False	10	-30	Individual_Q	1.0	0.05	2500000	5	True	IndivQLearningParticle/65_6_5_none	none		0.05
IndivQLearningParticle/66_6_6	slugs_centralized	shields/momentum_shield	True	-10	False	ParticleMomentum	True	False	10	-30	Individual_Q	1.0	0.05	2500000	6	True	IndivQLearningParticle/66_6_6_slugs_centralized	slugs_centralized	shields/momentum_shield	0.05
IndivQLearningParticle/66_6_6	slugs_centralized	shields/momentum_shield	True	-10	False	ParticleMomentum	True	False	10	-30	Individual_Q	1.0	0.05	2500000	6	True	IndivQLearningParticle/66_6_6_slugs_decentralized	slugs_decentralized	shields/momentum_shield	0.05
IndivQLearningParticle/66_6_6	slugs_centralized	shields/momentum_shield	True	-10	False	ParticleMomentum	True	False	10	-30	Individual_Q	1.0	0.05	2500000	6	True	IndivQLearningParticle/66_6_6_none	none		0.05
IndivQLearningParticle/67_6_7	slugs_centralized	shields/momentum_shield	True	-10	False	ParticleMomentum	True	False	10	-30	Individual_Q	1.0	0.05	2500000	7	True	IndivQLearningParticle/67_6_7_slugs_centralized	slugs_centralized	shields/momentum_shield	0.05
IndivQLearningParticle/67_6_7	slugs_centralized	shields/momentum_shield	True	-10	False	ParticleMomentum	True	False	10	-30	Individual_Q	1.0	0.05	2500000	7	True	IndivQLearningParticle/67_6_7_slugs_decentralized	slugs_decentralized	shields/momentum_shield	0.05
IndivQLearningParticle/67_6_7	slugs_centralized	shields/momentum_shield	True	-10	False	ParticleMomentum	True	False	10	-30	Individual_Q	1.0	0.05	2500000	7	True	IndivQLearningParticle/67_6_7_none	none		0.05
IndivQLearningParticle/68_6_8	slugs_centralized	shields/momentum_shield	True	-10	False	ParticleMomentum	True	False	10	-30	Individual_Q	1.0	0.05	2500000	8	True	IndivQLearningParticle/68_6_8_slugs_centralized	slugs_centralized	shields/momentum_shield	0.05
IndivQLearningParticle/68_6_8	slugs_centralized	shields/momentum_shield	True	-10	False	ParticleMomentum	True	False	10	-30	Individual_Q	1.0	0.05	2500000	8	True	IndivQLearningParticle/68_6_8_slugs_decentralized	slugs_decentralized	shields/momentum_shield	0.05
IndivQLearningParticle/68_6_8	slugs_centralized	shields/momentum_shield	True	-10	False	ParticleMomentum	True	False	10	-30	Individual_Q	1.0	0.05	2500000	8	True	IndivQLearningParticle/68_6_8_none	none		0.05
IndivQLearningParticle/69_6_9	slugs_centralized	shields/momentum_shield	True	-10	False	ParticleMomentum	True	False	10	-30	Individual_Q	1.0	0.05	2500000	9	True	IndivQLearningParticle/69_6_9_slugs_centralized	slugs_centralized	shields/momentum_shield	0.05
IndivQLearningParticle/69_6_9	slugs_centralized	shields/momentum_shield	True	-10	False	ParticleMomentum	True	False	10	-30	Individual_Q	1.0	0.05	2500000	9	True	IndivQLearningParticle/69_6_9_slugs_decentralized	slugs_decentralized	shields/momentum_shield	0.05
IndivQLearningParticle/69_6_9	slugs_centralized	shields/momentum_shield	True	-10	False	ParticleMomentum	True	False	10	-30	Individual_Q	1.0	0.05	2500000	9	True	IndivQLearningParticle/69_6_9_none	none		0.05
IndivQLearningParticle/70_7_0	slugs_centralized	shields/momentum_shield	True	-10	False	ParticleMomentum	False	False	10	-30	Individual_Q	1.0	0.05	2500000	0	True	IndivQLearningParticle/70_7_0_slugs_centralized	slugs_centralized	shields/momentum_shield	0.05
IndivQLearningParticle/70_7_0	slugs_centralized	shields/momentum_shield	True	-10	False	ParticleMomentum	False	False	10	-30	Individual_Q	1.0	0.05	2500000	0	True	IndivQLearningParticle/70_7_0_slugs_decentralized	slugs_decentralized	shields/momentum_shield	0.05
IndivQLearningParticle/70_7_0	slugs_centralized	shields/momentum_shield	True	-10	False	ParticleMomentum	False	False	10	-30	Individual_Q	1.0	0.05	2500000	0	True	IndivQLearningParticle/70_7_0_none	none		0.05
IndivQLearningParticle/71_7_1	slugs_centralized	shields/momentum_shield	True	-10	False	ParticleMomentum	False	False	10	-30	Individual_Q	1.0	0.05	2500000	1	True	IndivQLearningParticle/71_7_1_slugs_centralized	slugs_centralized	shields/momentum_shield	0.05
IndivQLearningParticle/71_7_1	slugs_centralized	shields/momentum_shield	True	-10	False	ParticleMomentum	False	False	10	-30	Individual_Q	1.0	0.05	2500000	1	True	IndivQLearningParticle/71_7_1_slugs_decentralized	slugs_decentralized	shields/momentum_shield	0.05
IndivQLearningParticle/71_7_1	slugs_centralized	shields/momentum_shield	True	-10	False	ParticleMomentum	False	False	10	-30	Individual_Q	1.0	0.05	2500000	1	True	IndivQLearningParticle/71_7_1_none	none		0.05
IndivQLearningParticle/72_7_2	slugs_centralized	shields/momentum_shield	True	-10	False	ParticleMomentum	False	False	10	-30	Individual_Q	1.0	0.05	2500000	2	True	IndivQLearningParticle/72_7_2_slugs_centralized	slugs_centralized	shields/momentum_shield	0.05
IndivQLearningParticle/72_7_2	slugs_centralized	shields/momentum_shield	True	-10	False	ParticleMomentum	False	False	10	-30	Individual_Q	1.0	0.05	2500000	2	True	IndivQLearningParticle/72_7_2_slugs_decentralized	slugs_decentralized	shields/momentum_shield	0.05
IndivQLearningParticle/72_7_2	slugs_centralized	shields/momentum_shield	True	-10	False	ParticleMomentum	False	False	10	-30	Individual_Q	1.0	0.05	2500000	2	True	IndivQLearningParticle/72_7_2_none	none		0.05
IndivQLearningParticle/73_7_3	slugs_centralized	shields/momentum_shield	True	-10	False	ParticleMomentum	False	False	10	-30	Individual_Q	1.0	0.05	2500000	3	True	IndivQLearningParticle/73_7_3_slugs_centralized	slugs_centralized	shields/momentum_shield	0.05
IndivQLearningParticle/73_7_3	slugs_centralized	shields/momentum_shield	True	-10	False	ParticleMomentum	False	False	10	-30	Individual_Q	1.0	0.05	2500000	3	True	IndivQLearningParticle/73_7_3_slugs_decentralized	slugs_decentralized	shields/momentum_shield	0.05
IndivQLearningParticle/73_7_3	slugs_centralized	shields/momentum_shield	True	-10	False	ParticleMomentum	False	False	10	-30	Individual_Q	1.0	0.05	2500000	3	True	IndivQLearningParticle/73_7_3_none	none		0.05
IndivQLearningParticle/74_7_4	slugs_centralized	shields/momentum_shield	True	-10	False	ParticleMomentum	False	False	10	-30	Individual_Q	1.0	0.05	2500000	4	True	IndivQLearningParticle/74_7_4_slugs_centralized	slugs_centralized	shields/momentum_shield	0.05
IndivQLearningParticle/74_7_4	slugs_centralized	shields/momentum_shield	True	-10	False	ParticleMomentum	False	False	10	-30	Individual_Q	1.0	0.05	2500000	4	True	IndivQLearningParticle/74_7_4_slugs_decentralized	slugs_decentralized	shields/momentum_shield	0.05
IndivQLearningParticle/74_7_4	slugs_centralized	shields/momentum_shield	True	-10	False	ParticleMomentum	False	False	10	-30	Individual_Q	1.0	0.05	2500000	4	True	IndivQLearningParticle/74_7_4_none	none		0.05
IndivQLearningParticle/75_7_5	slugs_centralized	shields/momentum_shield	True	-10	False	ParticleMomentum	False	False	10	-30	Individual_Q	1.0	0.05	2500000	5	True	IndivQLearningParticle/75_7_5_slugs_centralized	slugs_centralized	shields/momentum_shield	0.05
IndivQLearningParticle/75_7_5	slugs_centralized	shields/momentum_shield	True	-10	False	ParticleMomentum	False	False	10	-30	Individual_Q	1.0	0.05	2500000	5	True	IndivQLearningParticle/75_7_5_slugs_decentralized	slugs_decentralized	shields/momentum_shield	0.05
IndivQLearningParticle/75_7_5	slugs_centralized	shields/momentum_shield	True	-10	False	ParticleMomentum	False	False	10	-30	Individual_Q	1.0	0.05	2500000	5	True	IndivQLearningParticle/75_7_5_none	none		0.05
IndivQLearningParticle/76_7_6	slugs_centralized	shields/momentum_shield	True	-10	False	ParticleMomentum	False	False	10	-30	Individual_Q	1.0	0.05	2500000	6	True	IndivQLearningParticle/76_7_6_slugs_centralized	slugs_centralized	shields/momentum_shield	0.05
IndivQLearningParticle/76_7_6	slugs_centralized	shields/momentum_shield	True	-10	False	ParticleMomentum	False	False	10	-30	Individual_Q	1.0	0.05	2500000	6	True	IndivQLearningParticle/76_7_6_slugs_decentralized	slugs_decentralized	shields/momentum_shield	0.05
IndivQLearningParticle/76_7_6	slugs_centralized	shields/momentum_shield	True	-10	False	ParticleMomentum	False	False	10	-30	Individual_Q	1.0	0.05	2500000	6	True	IndivQLearningParticle/76_7_6_none	none		0.05
IndivQLearningParticle/77_7_7	slugs_centralized	shields/momentum_shield	True	-10	False	ParticleMomentum	False	False	10	-30	Individual_Q	1.0	0.05	2500000	7	True	IndivQLearningParticle/77_7_7_slugs_centralized	slugs_centralized	shields/momentum_shield	0.05
IndivQLearningParticle/77_7_7	slugs_centralized	shields/momentum_shield	True	-10	False	ParticleMomentum	False	False	10	-30	Individual_Q	1.0	0.05	2500000	7	True	IndivQLearningParticle/77_7_7_slugs_decentralized	slugs_decentralized	shields/momentum_shield	0.05
IndivQLearningParticle/77_7_7	slugs_centralized	shields/momentum_shield	True	-10	False	ParticleMomentum	False	False	10	-30	Individual_Q	1.0	0.05	2500000	7	True	IndivQLearningParticle/77_7_7_none	none		0.05
IndivQLearningParticle/78_7_8	slugs_centralized	shields/momentum_shield	True	-10	False	ParticleMomentum	False	False	10	-30	Individual_Q	1.0	0.05	2500000	8	True	IndivQLearningParticle/78_7_8_slugs_centralized	slugs_centralized	shields/momentum_shield	0.05
IndivQLearningParticle/78_7_8	slugs_centralized	shields/momentum_shield	True	-10	False	ParticleMomentum	False	False	10	-30	Individual_Q	1.0	0.05	2500000	8	True	IndivQLearningParticle/78_7_8_slugs_decentralized	slugs_decentralized	shields/momentum_shield	0.05
IndivQLearningParticle/78_7_8	slugs_centralized	shields/momentum_shield	True	-10	False	ParticleMomentum	False	False	10	-30	Individual_Q	1.0	0.05	2500000	8	True	IndivQLearningParticle/78_7_8_none	none		0.05
IndivQLearningParticle/79_7_9	slugs_centralized	shields/momentum_shield	True	-10	False	ParticleMomentum	False	False	10	-30	Individual_Q	1.0	0.05	2500000	9	True	IndivQLearningParticle/79_7_9_slugs_centralized	slugs_centralized	shields/momentum_shield	0.05
IndivQLearningParticle/79_7_9	slugs_centralized	shields/momentum_shield	True	-10	False	ParticleMomentum	False	False	10	-30	Individual_Q	1.0	0.05	2500000	9	True	IndivQLearningParticle/79_7_9_slugs_decentralized	slugs_decentralized	shields/momentum_shield	0.05
IndivQLearningParticle/79_7_9	slugs_centralized	shields/momentum_shield	True	-10	False	ParticleMomentum	False	False	10	-30	Individual_Q	1.0	0.05	2500000	9	True	IndivQLearningParticle/79_7_9_none	none		0.05
IndivQLearningParticle/80_8_0	slugs_decentralized	shields/momentum_shield	True	-10	False	ParticleMomentum	True	False	10	-30	Individual_Q	1.0	0.05	2500000	0	True	IndivQLearningParticle/80_8_0_slugs_centralized	slugs_centralized	shields/momentum_shield	0.05
IndivQLearningParticle/80_8_0	slugs_decentralized	shields/momentum_shield	True	-10	False	ParticleMomentum	True	False	10	-30	Individual_Q	1.0	0.05	2500000	0	True	IndivQLearningParticle/80_8_0_slugs_decentralized	slugs_decentralized	shields/momentum_shield	0.05
IndivQLearningParticle/80_8_0	slugs_decentralized	shields/momentum_shield	True	-10	False	ParticleMomentum	True	False	10	-30	Individual_Q	1.0	0.05	2500000	0	True	IndivQLearningParticle/80_8_0_none	none		0.05
IndivQLearningParticle/81_8_1	slugs_decentralized	shields/momentum_shield	True	-10	False	ParticleMomentum	True	False	10	-30	Individual_Q	1.0	0.05	2500000	1	True	IndivQLearningParticle/81_8_1_slugs_centralized	slugs_centralized	shields/momentum_shield	0.05
IndivQLearningParticle/81_8_1	slugs_decentralized	shields/momentum_shield	True	-10	False	ParticleMomentum	True	False	10	-30	Individual_Q	1.0	0.05	2500000	1	True	IndivQLearningParticle/81_8_1_slugs_decentralized	slugs_decentralized	shields/momentum_shield	0.05
IndivQLearningParticle/81_8_1	slugs_decentralized	shields/momentum_shield	True	-10	False	ParticleMomentum	True	False	10	-30	Individual_Q	1.0	0.05	2500000	1	True	IndivQLearningParticle/81_8_1_none	none		0.05
IndivQLearningParticle/82_8_2	slugs_decentralized	shields/momentum_shield	True	-10	False	ParticleMomentum	True	False	10	-30	Individual_Q	1.0	0.05	2500000	2	True	IndivQLearningParticle/82_8_2_slugs_centralized	slugs_centralized	shields/momentum_shield	0.05
IndivQLearningParticle/82_8_2	slugs_decentralized	shields/momentum_shield	True	-10	False	ParticleMomentum	True	False	10	-30	Individual_Q	1.0	0.05	2500000	2	True	IndivQLearningParticle/82_8_2_slugs_decentralized	slugs_decentralized	shields/momentum_shield	0.05
IndivQLearningParticle/82_8_2	slugs_decentralized	shields/momentum_shield	True	-10	False	ParticleMomentum	True	False	10	-30	Individual_Q	1.0	0.05	2500000	2	True	IndivQLearningParticle/82_8_2_none	none		0.05
IndivQLearningParticle/83_8_3	slugs_decentralized	shields/momentum_shield	True	-10	False	ParticleMomentum	True	False	10	-30	Individual_Q	1.0	0.05	2500000	3	True	IndivQLearningParticle/83_8_3_slugs_centralized	slugs_centralized	shields/momentum_shield	0.05
IndivQLearningParticle/83_8_3	slugs_decentralized	shields/momentum_shield	True	-10	False	ParticleMomentum	True	False	10	-30	Individual_Q	1.0	0.05	2500000	3	True	IndivQLearningParticle/83_8_3_slugs_decentralized	slugs_decentralized	shields/momentum_shield	0.05
IndivQLearningParticle/83_8_3	slugs_decentralized	shields/momentum_shield	True	-10	False	ParticleMomentum	True	False	10	-30	Individual_Q	1.0	0.05	2500000	3	True	IndivQLearningParticle/83_8_3_none	none		0.05
IndivQLearningParticle/84_8_4	slugs_decentralized	shields/momentum_shield	True	-10	False	ParticleMomentum	True	False	10	-30	Individual_Q	1.0	0.05	2500000	4	True	IndivQLearningParticle/84_8_4_slugs_centralized	slugs_centralized	shields/momentum_shield	0.05
IndivQLearningParticle/84_8_4	slugs_decentralized	shields/momentum_shield	True	-10	False	ParticleMomentum	True	False	10	-30	Individual_Q	1.0	0.05	2500000	4	True	IndivQLearningParticle/84_8_4_slugs_decentralized	slugs_decentralized	shields/momentum_shield	0.05
IndivQLearningParticle/84_8_4	slugs_decentralized	shields/momentum_shield	True	-10	False	ParticleMomentum	True	False	10	-30	Individual_Q	1.0	0.05	2500000	4	True	IndivQLearningParticle/84_8_4_none	none		0.05
IndivQLearningParticle/85_8_5	slugs_decentralized	shields/momentum_shield	True	-10	False	ParticleMomentum	True	False	10	-30	Individual_Q	1.0	0.05	2500000	5	True	IndivQLearningParticle/85_8_5_slugs_centralized	slugs_centralized	shields/momentum_shield	0.05
IndivQLearningParticle/85_8_5	slugs_decentralized	shields/momentum_shield	True	-10	False	ParticleMomentum	True	False	10	-30	Individual_Q	1.0	0.05	2500000	5	True	IndivQLearningParticle/85_8_5_slugs_decentralized	slugs_decentralized	shields/momentum_shield	0.05
IndivQLearningParticle/85_8_5	slugs_decentralized	shields/momentum_shield	True	-10	False	ParticleMomentum	True	False	10	-30	Individual_Q	1.0	0.05	2500000	5	True	IndivQLearningParticle/85_8_5_none	none		0.05
IndivQLearningParticle/86_8_6	slugs_decentralized	shields/momentum_shield	True	-10	False	ParticleMomentum	True	False	10	-30	Individual_Q	1.0	0.05	2500000	6	True	IndivQLearningParticle/86_8_6_slugs_centralized	slugs_centralized	shields/momentum_shield	0.05
IndivQLearningParticle/86_8_6	slugs_decentralized	shields/momentum_shield	True	-10	False	ParticleMomentum	True	False	10	-30	Individual_Q	1.0	0.05	2500000	6	True	IndivQLearningParticle/86_8_6_slugs_decentralized	slugs_decentralized	shields/momentum_shield	0.05
IndivQLearningParticle/86_8_6	slugs_decentralized	shields/momentum_shield	True	-10	False	ParticleMomentum	True	False	10	-30	Individual_Q	1.0	0.05	2500000	6	True	IndivQLearningParticle/86_8_6_none	none		0.05
IndivQLearningParticle/87_8_7	slugs_decentralized	shields/momentum_shield	True	-10	False	ParticleMomentum	True	False	10	-30	Individual_Q	1.0	0.05	2500000	7	True	IndivQLearningParticle/87_8_7_slugs_centralized	slugs_centralized	shields/momentum_shield	0.05
IndivQLearningParticle/87_8_7	slugs_decentralized	shields/momentum_shield	True	-10	False	ParticleMomentum	True	False	10	-30	Individual_Q	1.0	0.05	2500000	7	True	IndivQLearningParticle/87_8_7_slugs_decentralized	slugs_decentralized	shields/momentum_shield	0.05
IndivQLearningParticle/87_8_7	slugs_decentralized	shields/momentum_shield	True	-10	False	ParticleMomentum	True	False	10	-30	Individual_Q	1.0	0.05	2500000	7	True	IndivQLearningParticle/87_8_7_none	none		0.05
IndivQLearningParticle/88_8_8	slugs_decentralized	shields/momentum_shield	True	-10	False	ParticleMomentum	True	False	10	-30	Individual_Q	1.0	0.05	2500000	8	True	IndivQLearningParticle/88_8_8_slugs_centralized	slugs_centralized	shields/momentum_shield	0.05
IndivQLearningParticle/88_8_8	slugs_decentralized	shields/momentum_shield	True	-10	False	ParticleMomentum	True	False	10	-30	Individual_Q	1.0	0.05	2500000	8	True	IndivQLearningParticle/88_8_8_slugs_decentralized	slugs_decentralized	shields/momentum_shield	0.05
IndivQLearningParticle/88_8_8	slugs_decentralized	shields/momentum_shield	True	-10	False	ParticleMomentum	True	False	10	-30	Individual_Q	1.0	0.05	2500000	8	True	IndivQLearningParticle/88_8_8_none	none		0.05
IndivQLearningParticle/89_8_9	slugs_decentralized	shields/momentum_shield	True	-10	False	ParticleMomentum	True	False	10	-30	Individual_Q	1.0	0.05	2500000	9	True	IndivQLearningParticle/89_8_9_slugs_centralized	slugs_centralized	shields/momentum_shield	0.05
IndivQLearningParticle/89_8_9	slugs_decentralized	shields/momentum_shield	True	-10	False	ParticleMomentum	True	False	10	-30	Individual_Q	1.0	0.05	2500000	9	True	IndivQLearningParticle/89_8_9_slugs_decentralized	slugs_decentralized	shields/momentum_shield	0.05
IndivQLearningParticle/89_8_9	slugs_decentralized	shields/momentum_shield	True	-10	False	ParticleMomentum	True	False	10	-30	Individual_Q	1.0	0.05	2500000	9	True	IndivQLearningParticle/89_8_9_none	none		0.05
IndivQLearningParticle/90_9_0	slugs_decentralized	shields/momentum_shield	True	-10	False	ParticleMomentum	False	False	10	-30	Individual_Q	1.0	0.05	2500000	0	True	IndivQLearningParticle/90_9_0_slugs_centralized	slugs_centralized	shields/momentum_shield	0.05
IndivQLearningParticle/90_9_0	slugs_decentralized	shields/momentum_shield	True	-10	False	ParticleMomentum	False	False	10	-30	Individual_Q	1.0	0.05	2500000	0	True	IndivQLearningParticle/90_9_0_slugs_decentralized	slugs_decentralized	shields/momentum_shield	0.05
IndivQLearningParticle/90_9_0	slugs_decentralized	shields/momentum_shield	True	-10	False	ParticleMomentum	False	False	10	-30	Individual_Q	1.0	0.05	2500000	0	True	IndivQLearningParticle/90_9_0_none	none		0.05
IndivQLearningParticle/91_9_1	slugs_decentralized	shields/momentum_shield	True	-10	False	ParticleMomentum	False	False	10	-30	Individual_Q	1.0	0.05	2500000	1	True	IndivQLearningParticle/91_9_1_slugs_centralized	slugs_centralized	shields/momentum_shield	0.05
IndivQLearningParticle/91_9_1	slugs_decentralized	shields/momentum_shield	True	-10	False	ParticleMomentum	False	False	10	-30	Individual_Q	1.0	0.05	2500000	1	True	IndivQLearningParticle/91_9_1_slugs_decentralized	slugs_decentralized	shields/momentum_shield	0.05
IndivQLearningParticle/91_9_1	slugs_decentralized	shields/momentum_shield	True	-10	False	ParticleMomentum	False	False	10	-30	Individual_Q	1.0	0.05	2500000	1	True	IndivQLearningParticle/91_9_1_none	none		0.05
IndivQLearningParticle/92_9_2	slugs_decentralized	shields/momentum_shield	True	-10	False	ParticleMomentum	False	False	10	-30	Individual_Q	1.0	0.05	2500000	2	True	IndivQLearningParticle/92_9_2_slugs_centralized	slugs_centralized	shields/momentum_shield	0.05
IndivQLearningParticle/92_9_2	slugs_decentralized	shields/momentum_shield	True	-10	False	ParticleMomentum	False	False	10	-30	Individual_Q	1.0	0.05	2500000	2	True	IndivQLearningParticle/92_9_2_slugs_decentralized	slugs_decentralized	shields/momentum_shield	0.05
IndivQLearningParticle/92_9_2	slugs_decentralized	shields/momentum_shield	True	-10	False	ParticleMomentum	False	False	10	-30	Individual_Q	1.0	0.05	2500000	2	True	IndivQLearningParticle/92_9_2_none	none		0.05
IndivQLearningParticle/93_9_3	slugs_decentralized	shields/momentum_shield	True	-10	False	ParticleMomentum	False	False	10	-30	Individual_Q	1.0	0.05	2500000	3	True	IndivQLearningParticle/93_9_3_slugs_centralized	slugs_centralized	shields/momentum_shield	0.05
IndivQLearningParticle/93_9_3	slugs_decentralized	shields/momentum_shield	True	-10	False	ParticleMomentum	False	False	10	-30	Individual_Q	1.0	0.05	2500000	3	True	IndivQLearningParticle/93_9_3_slugs_decentralized	slugs_decentralized	shields/momentum_shield	0.05
IndivQLearningParticle/93_9_3	slugs_decentralized	shields/momentum_shield	True	-10	False	ParticleMomentum	False	False	10	-30	Individual_Q	1.0	0.05	2500000	3	True	IndivQLearningParticle/93_9_3_none	none		0.05
IndivQLearningParticle/94_9_4	slugs_decentralized	shields/momentum_shield	True	-10	False	ParticleMomentum	False	False	10	-30	Individual_Q	1.0	0.05	2500000	4	True	IndivQLearningParticle/94_9_4_slugs_centralized	slugs_centralized	shields/momentum_shield	0.05
IndivQLearningParticle/94_9_4	slugs_decentralized	shields/momentum_shield	True	-10	False	ParticleMomentum	False	False	10	-30	Individual_Q	1.0	0.05	2500000	4	True	IndivQLearningParticle/94_9_4_slugs_decentralized	slugs_decentralized	shields/momentum_shield	0.05
IndivQLearningParticle/94_9_4	slugs_decentralized	shields/momentum_shield	True	-10	False	ParticleMomentum	False	False	10	-30	Individual_Q	1.0	0.05	2500000	4	True	IndivQLearningParticle/94_9_4_none	none		0.05
IndivQLearningParticle/95_9_5	slugs_decentralized	shields/momentum_shield	True	-10	False	ParticleMomentum	False	False	10	-30	Individual_Q	1.0	0.05	2500000	5	True	IndivQLearningParticle/95_9_5_slugs_centralized	slugs_centralized	shields/momentum_shield	0.05
IndivQLearningParticle/95_9_5	slugs_decentralized	shields/momentum_shield	True	-10	False	ParticleMomentum	False	False	10	-30	Individual_Q	1.0	0.05	2500000	5	True	IndivQLearningParticle/95_9_5_slugs_decentralized	slugs_decentralized	shields/momentum_shield	0.05
IndivQLearningParticle/95_9_5	slugs_decentralized	shields/momentum_shield	True	-10	False	ParticleMomentum	False	False	10	-30	Individual_Q	1.0	0.05	2500000	5	True	IndivQLearningParticle/95_9_5_none	none		0.05
IndivQLearningParticle/96_9_6	slugs_decentralized	shields/momentum_shield	True	-10	False	ParticleMomentum	False	False	10	-30	Individual_Q	1.0	0.05	2500000	6	True	IndivQLearningParticle/96_9_6_slugs_centralized	slugs_centralized	shields/momentum_shield	0.05
IndivQLearningParticle/96_9_6	slugs_decentralized	shields/momentum_shield	True	-10	False	ParticleMomentum	False	False	10	-30	Individual_Q	1.0	0.05	2500000	6	True	IndivQLearningParticle/96_9_6_slugs_decentralized	slugs_decentralized	shields/momentum_shield	0.05
IndivQLearningParticle/96_9_6	slugs_decentralized	shields/momentum_shield	True	-10	False	ParticleMomentum	False	False	10	-30	Individual_Q	1.0	0.05	2500000	6	True	IndivQLearningParticle/96_9_6_none	none		0.05
IndivQLearningParticle/97_9_7	slugs_decentralized	shields/momentum_shield	True	-10	False	ParticleMomentum	False	False	10	-30	Individual_Q	1.0	0.05	2500000	7	True	IndivQLearningParticle/97_9_7_slugs_centralized	slugs_centralized	shields/momentum_shield	0.05
IndivQLearningParticle/97_9_7	slugs_decentralized	shields/momentum_shield	True	-10	False	ParticleMomentum	False	False	10	-30	Individual_Q	1.0	0.05	2500000	7	True	IndivQLearningParticle/97_9_7_slugs_decentralized	slugs_decentralized	shields/momentum_shield	0.05
IndivQLearningParticle/97_9_7	slugs_decentralized	shields/momentum_shield	True	-10	False	ParticleMomentum	False	False	10	-30	Individual_Q	1.0	0.05	2500000	7	True	IndivQLearningParticle/97_9_7_none	none		0.05
IndivQLearningParticle/98_9_8	slugs_decentralized	shields/momentum_shield	True	-10	False	ParticleMomentum	False	False	10	-30	Individual_Q	1.0	0.05	2500000	8	True	IndivQLearningParticle/98_9_8_slugs_centralized	slugs_centralized	shields/momentum_shield	0.05
IndivQLearningParticle/98_9_8	slugs_decentralized	shields/momentum_shield	True	-10	False	ParticleMomentum	False	False	10	-30	Individual_Q	1.0	0.05	2500000	8	True	IndivQLearningParticle/98_9_8_slugs_decentralized	slugs_decentralized	shields/momentum_shield	0.05
IndivQLearningParticle/98_9_8	slugs_decentralized	shields/momentum_shield	True	-10	False	ParticleMomentum	False	False	10	-30	Individual_Q	1.0	0.05	2500000	8	True	IndivQLearningParticle/98_9_8_none	none		0.05
IndivQLearningParticle/99_9_9	slugs_decentralized	shields/momentum_shield	True	-10	False	ParticleMomentum	False	False	10	-30	Individual_Q	1.0	0.05	2500000	9	True	IndivQLearningParticle/99_9_9_slugs_centralized	slugs_centralized	shields/momentum_shield	0.05
IndivQLearningParticle/99_9_9	slugs_decentralized	shields/momentum_shield	True	-10	False	ParticleMomentum	False	False	10	-30	Individual_Q	1.0	0.05	2500000	9	True	IndivQLearningParticle/99_9_9_slugs_decentralized	slugs_decentralized	shields/momentum_shield	0.05
IndivQLearningParticle/99_9_9	slugs_decentralized	shields/momentum_shield	True	-10	False	ParticleMomentum	False	False	10	-30	Individual_Q	1.0	0.05	2500000	9	True	IndivQLearningParticle/99_9_9_none	none		0.05
IndivQLearningParticle/100_10_0	none		True	-10	False	ParticleMomentum	True	False	10	-30	Individual_Q	1.0	0.05	2500000	0	True	IndivQLearningParticle/100_10_0_slugs_centralized	slugs_centralized	shields/momentum_shield	0.05
IndivQLearningParticle/100_10_0	none		True	-10	False	ParticleMomentum	True	False	10	-30	Individual_Q	1.0	0.05	2500000	0	True	IndivQLearningParticle/100_10_0_slugs_decentralized	slugs_decentralized	shields/momentum_shield	0.05
IndivQLearningParticle/100_10_0	none		True	-10	False	ParticleMomentum	True	False	10	-30	Individual_Q	1.0	0.05	2500000	0	True	IndivQLearningParticle/100_10_0_none	none		0.05
IndivQLearningParticle/101_10_1	none		True	-10	False	ParticleMomentum	True	False	10	-30	Individual_Q	1.0	0.05	2500000	1	True	IndivQLearningParticle/101_10_1_slugs_centralized	slugs_centralized	shields/momentum_shield	0.05
IndivQLearningParticle/101_10_1	none		True	-10	False	ParticleMomentum	True	False	10	-30	Individual_Q	1.0	0.05	2500000	1	True	IndivQLearningParticle/101_10_1_slugs_decentralized	slugs_decentralized	shields/momentum_shield	0.05
IndivQLearningParticle/101_10_1	none		True	-10	False	ParticleMomentum	True	False	10	-30	Individual_Q	1.0	0.05	2500000	1	True	IndivQLearningParticle/101_10_1_none	none		0.05
IndivQLearningParticle/102_10_2	none		True	-10	False	ParticleMomentum	True	False	10	-30	Individual_Q	1.0	0.05	2500000	2	True	IndivQLearningParticle/102_10_2_slugs_centralized	slugs_centralized	shields/momentum_shield	0.05
IndivQLearningParticle/102_10_2	none		True	-10	False	ParticleMomentum	True	False	10	-30	Individual_Q	1.0	0.05	2500000	2	True	IndivQLearningParticle/102_10_2_slugs_decentralized	slugs_decentralized	shields/momentum_shield	0.05
IndivQLearningParticle/102_10_2	none		True	-10	False	ParticleMomentum	True	False	10	-30	Individual_Q	1.0	0.05	2500000	2	True	IndivQLearningParticle/102_10_2_none	none		0.05
IndivQLearningParticle/103_10_3	none		True	-10	False	ParticleMomentum	True	False	10	-30	Individual_Q	1.0	0.05	2500000	3	True	IndivQLearningParticle/103_10_3_slugs_centralized	slugs_centralized	shields/momentum_shield	0.05
IndivQLearningParticle/103_10_3	none		True	-10	False	ParticleMomentum	True	False	10	-30	Individual_Q	1.0	0.05	2500000	3	True	IndivQLearningParticle/103_10_3_slugs_decentralized	slugs_decentralized	shields/momentum_shield	0.05
IndivQLearningParticle/103_10_3	none		True	-10	False	ParticleMomentum	True	False	10	-30	Individual_Q	1.0	0.05	2500000	3	True	IndivQLearningParticle/103_10_3_none	none		0.05
IndivQLearningParticle/104_10_4	none		True	-10	False	ParticleMomentum	True	False	10	-30	Individual_Q	1.0	0.05	2500000	4	True	IndivQLearningParticle/104_10_4_slugs_centralized	slugs_centralized	shields/momentum_shield	0.05
IndivQLearningParticle/104_10_4	none		True	-10	False	ParticleMomentum	True	False	10	-30	Individual_Q	1.0	0.05	2500000	4	True	IndivQLearningParticle/104_10_4_slugs_decentralized	slugs_decentralized	shields/momentum_shield	0.05
IndivQLearningParticle/104_10_4	none		True	-10	False	ParticleMomentum	True	False	10	-30	Individual_Q	1.0	0.05	2500000	4	True	IndivQLearningParticle/104_10_4_none	none		0.05
IndivQLearningParticle/105_10_5	none		True	-10	False	ParticleMomentum	True	False	10	-30	Individual_Q	1.0	0.05	2500000	5	True	IndivQLearningParticle/105_10_5_slugs_centralized	slugs_centralized	shields/momentum_shield	0.05
IndivQLearningParticle/105_10_5	none		True	-10	False	ParticleMomentum	True	False	10	-30	Individual_Q	1.0	0.05	2500000	5	True	IndivQLearningParticle/105_10_5_slugs_decentralized	slugs_decentralized	shields/momentum_shield	0.05
IndivQLearningParticle/105_10_5	none		True	-10	False	ParticleMomentum	True	False	10	-30	Individual_Q	1.0	0.05	2500000	5	True	IndivQLearningParticle/105_10_5_none	none		0.05
IndivQLearningParticle/106_10_6	none		True	-10	False	ParticleMomentum	True	False	10	-30	Individual_Q	1.0	0.05	2500000	6	True	IndivQLearningParticle/106_10_6_slugs_centralized	slugs_centralized	shields/momentum_shield	0.05
IndivQLearningParticle/106_10_6	none		True	-10	False	ParticleMomentum	True	False	10	-30	Individual_Q	1.0	0.05	2500000	6	True	IndivQLearningParticle/106_10_6_slugs_decentralized	slugs_decentralized	shields/momentum_shield	0.05
IndivQLearningParticle/106_10_6	none		True	-10	False	ParticleMomentum	True	False	10	-30	Individual_Q	1.0	0.05	2500000	6	True	IndivQLearningParticle/106_10_6_none	none		0.05
IndivQLearningParticle/107_10_7	none		True	-10	False	ParticleMomentum	True	False	10	-30	Individual_Q	1.0	0.05	2500000	7	True	IndivQLearningParticle/107_10_7_slugs_centralized	slugs_centralized	shields/momentum_shield	0.05
IndivQLearningParticle/107_10_7	none		True	-10	False	ParticleMomentum	True	False	10	-30	Individual_Q	1.0	0.05	2500000	7	True	IndivQLearningParticle/107_10_7_slugs_decentralized	slugs_decentralized	shields/momentum_shield	0.05
IndivQLearningParticle/107_10_7	none		True	-10	False	ParticleMomentum	True	False	10	-30	Individual_Q	1.0	0.05	2500000	7	True	IndivQLearningParticle/107_10_7_none	none		0.05
IndivQLearningParticle/108_10_8	none		True	-10	False	ParticleMomentum	True	False	10	-30	Individual_Q	1.0	0.05	2500000	8	True	IndivQLearningParticle/108_10_8_slugs_centralized	slugs_centralized	shields/momentum_shield	0.05
IndivQLearningParticle/108_10_8	none		True	-10	False	ParticleMomentum	True	False	10	-30	Individual_Q	1.0	0.05	2500000	8	True	IndivQLearningParticle/108_10_8_slugs_decentralized	slugs_decentralized	shields/momentum_shield	0.05
IndivQLearningParticle/108_10_8	none		True	-10	False	ParticleMomentum	True	False	10	-30	Individual_Q	1.0	0.05	2500000	8	True	IndivQLearningParticle/108_10_8_none	none		0.05
IndivQLearningParticle/109_10_9	none		True	-10	False	ParticleMomentum	True	False	10	-30	Individual_Q	1.0	0.05	2500000	9	True	IndivQLearningParticle/109_10_9_slugs_centralized	slugs_centralized	shields/momentum_shield	0.05
IndivQLearningParticle/109_10_9	none		True	-10	False	ParticleMomentum	True	False	10	-30	Individual_Q	1.0	0.05	2500000	9	True	IndivQLearningParticle/109_10_9_slugs_decentralized	slugs_decentralized	shields/momentum_shield	0.05
IndivQLearningParticle/109_10_9	none		True	-10	False	ParticleMomentum	True	False	10	-30	Individual_Q	1.0	0.05	2500000	9	True	IndivQLearningParticle/109_10_9_none	none		0.05
IndivQLearningParticle/110_11_0	none		True	-10	False	ParticleMomentum	False	False	10	-30	Individual_Q	1.0	0.05	2500000	0	True	IndivQLearningParticle/110_11_0_slugs_centralized	slugs_centralized	shields/momentum_shield	0.05
IndivQLearningParticle/110_11_0	none		True	-10	False	ParticleMomentum	False	False	10	-30	Individual_Q	1.0	0.05	2500000	0	True	IndivQLearningParticle/110_11_0_slugs_decentralized	slugs_decentralized	shields/momentum_shield	0.05
IndivQLearningParticle/110_11_0	none		True	-10	False	ParticleMomentum	False	False	10	-30	Individual_Q	1.0	0.05	2500000	0	True	IndivQLearningParticle/110_11_0_none	none		0.05
IndivQLearningParticle/111_11_1	none		True	-10	False	ParticleMomentum	False	False	10	-30	Individual_Q	1.0	0.05	2500000	1	True	IndivQLearningParticle/111_11_1_slugs_centralized	slugs_centralized	shields/momentum_shield	0.05
IndivQLearningParticle/111_11_1	none		True	-10	False	ParticleMomentum	False	False	10	-30	Individual_Q	1.0	0.05	2500000	1	True	IndivQLearningParticle/111_11_1_slugs_decentralized	slugs_decentralized	shields/momentum_shield	0.05
IndivQLearningParticle/111_11_1	none		True	-10	False	ParticleMomentum	False	False	10	-30	Individual_Q	1.0	0.05	2500000	1	True	IndivQLearningParticle/111_11_1_none	none		0.05
IndivQLearningParticle/112_11_2	none		True	-10	False	ParticleMomentum	False	False	10	-30	Individual_Q	1.0	0.05	2500000	2	True	IndivQLearningParticle/112_11_2_slugs_centralized	slugs_centralized	shields/momentum_shield	0.05
IndivQLearningParticle/112_11_2	none		True	-10	False	ParticleMomentum	False	False	10	-30	Individual_Q	1.0	0.05	2500000	2	True	IndivQLearningParticle/112_11_2_slugs_decentralized	slugs_decentralized	shields/momentum_shield	0.05
IndivQLearningParticle/112_11_2	none		True	-10	False	ParticleMomentum	False	False	10	-30	Individual_Q	1.0	0.05	2500000	2	True	IndivQLearningParticle/112_11_2_none	none		0.05
IndivQLearningParticle/113_11_3	none		True	-10	False	ParticleMomentum	False	False	10	-30	Individual_Q	1.0	0.05	2500000	3	True	IndivQLearningParticle/113_11_3_slugs_centralized	slugs_centralized	shields/momentum_shield	0.05
IndivQLearningParticle/113_11_3	none		True	-10	False	ParticleMomentum	False	False	10	-30	Individual_Q	1.0	0.05	2500000	3	True	IndivQLearningParticle/113_11_3_slugs_decentralized	slugs_decentralized	shields/momentum_shield	0.05
IndivQLearningParticle/113_11_3	none		True	-10	False	ParticleMomentum	False	False	10	-30	Individual_Q	1.0	0.05	2500000	3	True	IndivQLearningParticle/113_11_3_none	none		0.05
IndivQLearningParticle/114_11_4	none		True	-10	False	ParticleMomentum	False	False	10	-30	Individual_Q	1.0	0.05	2500000	4	True	IndivQLearningParticle/114_11_4_slugs_centralized	slugs_centralized	shields/momentum_shield	0.05
IndivQLearningParticle/114_11_4	none		True	-10	False	ParticleMomentum	False	False	10	-30	Individual_Q	1.0	0.05	2500000	4	True	IndivQLearningParticle/114_11_4_slugs_decentralized	slugs_decentralized	shields/momentum_shield	0.05
IndivQLearningParticle/114_11_4	none		True	-10	False	ParticleMomentum	False	False	10	-30	Individual_Q	1.0	0.05	2500000	4	True	IndivQLearningParticle/114_11_4_none	none		0.05
IndivQLearningParticle/115_11_5	none		True	-10	False	ParticleMomentum	False	False	10	-30	Individual_Q	1.0	0.05	2500000	5	True	IndivQLearningParticle/115_11_5_slugs_centralized	slugs_centralized	shields/momentum_shield	0.05
IndivQLearningParticle/115_11_5	none		True	-10	False	ParticleMomentum	False	False	10	-30	Individual_Q	1.0	0.05	2500000	5	True	IndivQLearningParticle/115_11_5_slugs_decentralized	slugs_decentralized	shields/momentum_shield	0.05
IndivQLearningParticle/115_11_5	none		True	-10	False	ParticleMomentum	False	False	10	-30	Individual_Q	1.0	0.05	2500000	5	True	IndivQLearningParticle/115_11_5_none	none		0.05
IndivQLearningParticle/116_11_6	none		True	-10	False	ParticleMomentum	False	False	10	-30	Individual_Q	1.0	0.05	2500000	6	True	IndivQLearningParticle/116_11_6_slugs_centralized	slugs_centralized	shields/momentum_shield	0.05
IndivQLearningParticle/116_11_6	none		True	-10	False	ParticleMomentum	False	False	10	-30	Individual_Q	1.0	0.05	2500000	6	True	IndivQLearningParticle/116_11_6_slugs_decentralized	slugs_decentralized	shields/momentum_shield	0.05
IndivQLearningParticle/116_11_6	none		True	-10	False	ParticleMomentum	False	False	10	-30	Individual_Q	1.0	0.05	2500000	6	True	IndivQLearningParticle/116_11_6_none	none		0.05
IndivQLearningParticle/117_11_7	none		True	-10	False	ParticleMomentum	False	False	10	-30	Individual_Q	1.0	0.05	2500000	7	True	IndivQLearningParticle/117_11_7_slugs_centralized	slugs_centralized	shields/momentum_shield	0.05
IndivQLearningParticle/117_11_7	none		True	-10	False	ParticleMomentum	False	False	10	-30	Individual_Q	1.0	0.05	2500000	7	True	IndivQLearningParticle/117_11_7_slugs_decentralized	slugs_decentralized	shields/momentum_shield	0.05
IndivQLearningParticle/117_11_7	none		True	-10	False	ParticleMomentum	False	False	10	-30	Individual_Q	1.0	0.05	2500000	7	True	IndivQLearningParticle/117_11_7_none	none		0.05
IndivQLearningParticle/118_11_8	none		True	-10	False	ParticleMomentum	False	False	10	-30	Individual_Q	1.0	0.05	2500000	8	True	IndivQLearningParticle/118_11_8_slugs_centralized	slugs_centralized	shields/momentum_shield	0.05
IndivQLearningParticle/118_11_8	none		True	-10	False	ParticleMomentum	False	False	10	-30	Individual_Q	1.0	0.05	2500000	8	True	IndivQLearningParticle/118_11_8_slugs_decentralized	slugs_decentralized	shields/momentum_shield	0.05
IndivQLearningParticle/118_11_8	none		True	-10	False	ParticleMomentum	False	False	10	-30	Individual_Q	1.0	0.05	2500000	8	True	IndivQLearningParticle/118_11_8_none	none		0.05
IndivQLearningParticle/119_11_9	none		True	-10	False	ParticleMomentum	False	False	10	-30	Individual_Q	1.0	0.05	2500000	9	True	IndivQLearningParticle/119_11_9_slugs_centralized	slugs_centralized	shields/momentum_shield	0.05
IndivQLearningParticle/119_11_9	none		True	-10	False	ParticleMomentum	False	False	10	-30	Individual_Q	1.0	0.05	2500000	9	True	IndivQLearningParticle/119_11_9_slugs_decentralized	slugs_decentralized	shields/momentum_shield	0.05
IndivQLearningParticle/119_11_9	none		True	-10	False	ParticleMomentum	False	False	10	-30	Individual_Q	1.0	0.05	2500000	9	True	IndivQLearningParticle/119_11_9_none	none		0.05
