# Supplementary material
Source: ML conference proceedings conference paper supplement (https://proceedings.neurips.cc/paper_files/paper/2022/hash/57444e14ecd9e2c8f603b4f012ce3811-Abstract.html)
Supplement: Supplementary file 1 [file 57444e14ecd9e2c8f603b4f012ce3811-Supplemental-Conference.zip › 3410_shield_decentralization_for_sa-Supplementary Material/parallel_configs/IndivQLearningParticleTrain.csv]

run_name	shield	shield_specification	punish_unsafe_orig_action	punish_unsafe_orig_action_modifier	randomize_starts	map_type	particle_agents_observe_momentum	particle_terminate_on_collision	particle_world_size	particle_collision_penalty	learner_type	learner_anneal_eps_start	learner_anneal_eps_finish	max_total_steps	seed	skip_evaluation
IndivQLearningParticle/0_0_0	slugs_centralized	shields/momentum_shield	True	-10	True	ParticleMomentum	True	False	10	-30	Individual_Q	1.0	0.05	2500000	0	True
IndivQLearningParticle/1_0_1	slugs_centralized	shields/momentum_shield	True	-10	True	ParticleMomentum	True	False	10	-30	Individual_Q	1.0	0.05	2500000	1	True
IndivQLearningParticle/2_0_2	slugs_centralized	shields/momentum_shield	True	-10	True	ParticleMomentum	True	False	10	-30	Individual_Q	1.0	0.05	2500000	2	True
IndivQLearningParticle/3_0_3	slugs_centralized	shields/momentum_shield	True	-10	True	ParticleMomentum	True	False	10	-30	Individual_Q	1.0	0.05	2500000	3	True
IndivQLearningParticle/4_0_4	slugs_centralized	shields/momentum_shield	True	-10	True	ParticleMomentum	True	False	10	-30	Individual_Q	1.0	0.05	2500000	4	True
IndivQLearningParticle/5_0_5	slugs_centralized	shields/momentum_shield	True	-10	True	ParticleMomentum	True	False	10	-30	Individual_Q	1.0	0.05	2500000	5	True
IndivQLearningParticle/6_0_6	slugs_centralized	shields/momentum_shield	True	-10	True	ParticleMomentum	True	False	10	-30	Individual_Q	1.0	0.05	2500000	6	True
IndivQLearningParticle/7_0_7	slugs_centralized	shields/momentum_shield	True	-10	True	ParticleMomentum	True	False	10	-30	Individual_Q	1.0	0.05	2500000	7	True
IndivQLearningParticle/8_0_8	slugs_centralized	shields/momentum_shield	True	-10	True	ParticleMomentum	True	False	10	-30	Individual_Q	1.0	0.05	2500000	8	True
IndivQLearningParticle/9_0_9	slugs_centralized	shields/momentum_shield	True	-10	True	ParticleMomentum	True	False	10	-30	Individual_Q	1.0	0.05	2500000	9	True
IndivQLearningParticle/10_1_0	slugs_centralized	shields/momentum_shield	True	-10	True	ParticleMomentum	False	False	10	-30	Individual_Q	1.0	0.05	2500000	0	True
IndivQLearningParticle/11_1_1	slugs_centralized	shields/momentum_shield	True	-10	True	ParticleMomentum	False	False	10	-30	Individual_Q	1.0	0.05	2500000	1	True
IndivQLearningParticle/12_1_2	slugs_centralized	shields/momentum_shield	True	-10	True	ParticleMomentum	False	False	10	-30	Individual_Q	1.0	0.05	2500000	2	True
IndivQLearningParticle/13_1_3	slugs_centralized	shields/momentum_shield	True	-10	True	ParticleMomentum	False	False	10	-30	Individual_Q	1.0	0.05	2500000	3	True
IndivQLearningParticle/14_1_4	slugs_centralized	shields/momentum_shield	True	-10	True	ParticleMomentum	False	False	10	-30	Individual_Q	1.0	0.05	2500000	4	True
IndivQLearningParticle/15_1_5	slugs_centralized	shields/momentum_shield	True	-10	True	ParticleMomentum	False	False	10	-30	Individual_Q	1.0	0.05	2500000	5	True
IndivQLearningParticle/16_1_6	slugs_centralized	shields/momentum_shield	True	-10	True	ParticleMomentum	False	False	10	-30	Individual_Q	1.0	0.05	2500000	6	True
IndivQLearningParticle/17_1_7	slugs_centralized	shields/momentum_shield	True	-10	True	ParticleMomentum	False	False	10	-30	Individual_Q	1.0	0.05	2500000	7	True
IndivQLearningParticle/18_1_8	slugs_centralized	shields/momentum_shield	True	-10	True	ParticleMomentum	False	False	10	-30	Individual_Q	1.0	0.05	2500000	8	True
IndivQLearningParticle/19_1_9	slugs_centralized	shields/momentum_shield	True	-10	True	ParticleMomentum	False	False	10	-30	Individual_Q	1.0	0.05	2500000	9	True
IndivQLearningParticle/20_2_0	slugs_decentralized	shields/momentum_shield	True	-10	True	ParticleMomentum	True	False	10	-30	Individual_Q	1.0	0.05	2500000	0	True
IndivQLearningParticle/21_2_1	slugs_decentralized	shields/momentum_shield	True	-10	True	ParticleMomentum	True	False	10	-30	Individual_Q	1.0	0.05	2500000	1	True
IndivQLearningParticle/22_2_2	slugs_decentralized	shields/momentum_shield	True	-10	True	ParticleMomentum	True	False	10	-30	Individual_Q	1.0	0.05	2500000	2	True
IndivQLearningParticle/23_2_3	slugs_decentralized	shields/momentum_shield	True	-10	True	ParticleMomentum	True	False	10	-30	Individual_Q	1.0	0.05	2500000	3	True
IndivQLearningParticle/24_2_4	slugs_decentralized	shields/momentum_shield	True	-10	True	ParticleMomentum	True	False	10	-30	Individual_Q	1.0	0.05	2500000	4	True
IndivQLearningParticle/25_2_5	slugs_decentralized	shields/momentum_shield	True	-10	True	ParticleMomentum	True	False	10	-30	Individual_Q	1.0	0.05	2500000	5	True
IndivQLearningParticle/26_2_6	slugs_decentralized	shields/momentum_shield	True	-10	True	ParticleMomentum	True	False	10	-30	Individual_Q	1.0	0.05	2500000	6	True
IndivQLearningParticle/27_2_7	slugs_decentralized	shields/momentum_shield	True	-10	True	ParticleMomentum	True	False	10	-30	Individual_Q	1.0	0.05	2500000	7	True
IndivQLearningParticle/28_2_8	slugs_decentralized	shields/momentum_shield	True	-10	True	ParticleMomentum	True	False	10	-30	Individual_Q	1.0	0.05	2500000	8	True
IndivQLearningParticle/29_2_9	slugs_decentralized	shields/momentum_shield	True	-10	True	ParticleMomentum	True	False	10	-30	Individual_Q	1.0	0.05	2500000	9	True
IndivQLearningParticle/30_3_0	slugs_decentralized	shields/momentum_shield	True	-10	True	ParticleMomentum	False	False	10	-30	Individual_Q	1.0	0.05	2500000	0	True
IndivQLearningParticle/31_3_1	slugs_decentralized	shields/momentum_shield	True	-10	True	ParticleMomentum	False	False	10	-30	Individual_Q	1.0	0.05	2500000	1	True
IndivQLearningParticle/32_3_2	slugs_decentralized	shields/momentum_shield	True	-10	True	ParticleMomentum	False	False	10	-30	Individual_Q	1.0	0.05	2500000	2	True
IndivQLearningParticle/33_3_3	slugs_decentralized	shields/momentum_shield	True	-10	True	ParticleMomentum	False	False	10	-30	Individual_Q	1.0	0.05	2500000	3	True
IndivQLearningParticle/34_3_4	slugs_decentralized	shields/momentum_shield	True	-10	True	ParticleMomentum	False	False	10	-30	Individual_Q	1.0	0.05	2500000	4	True
IndivQLearningParticle/35_3_5	slugs_decentralized	shields/momentum_shield	True	-10	True	ParticleMomentum	False	False	10	-30	Individual_Q	1.0	0.05	2500000	5	True
IndivQLearningParticle/36_3_6	slugs_decentralized	shields/momentum_shield	True	-10	True	ParticleMomentum	False	False	10	-30	Individual_Q	1.0	0.05	2500000	6	True
IndivQLearningParticle/37_3_7	slugs_decentralized	shields/momentum_shield	True	-10	True	ParticleMomentum	False	False	10	-30	Individual_Q	1.0	0.05	2500000	7	True
IndivQLearningParticle/38_3_8	slugs_decentralized	shields/momentum_shield	True	-10	True	ParticleMomentum	False	False	10	-30	Individual_Q	1.0	0.05	2500000	8	True
IndivQLearningParticle/39_3_9	slugs_decentralized	shields/momentum_shield	True	-10	True	ParticleMomentum	False	False	10	-30	Individual_Q	1.0	0.05	2500000	9	True
IndivQLearningParticle/40_4_0	none		True	-10	True	ParticleMomentum	True	False	10	-30	Individual_Q	1.0	0.05	2500000	0	True
IndivQLearningParticle/41_4_1	none		True	-10	True	ParticleMomentum	True	False	10	-30	Individual_Q	1.0	0.05	2500000	1	True
IndivQLearningParticle/42_4_2	none		True	-10	True	ParticleMomentum	True	False	10	-30	Individual_Q	1.0	0.05	2500000	2	True
IndivQLearningParticle/43_4_3	none		True	-10	True	ParticleMomentum	True	False	10	-30	Individual_Q	1.0	0.05	2500000	3	True
IndivQLearningParticle/44_4_4	none		True	-10	True	ParticleMomentum	True	False	10	-30	Individual_Q	1.0	0.05	2500000	4	True
IndivQLearningParticle/45_4_5	none		True	-10	True	ParticleMomentum	True	False	10	-30	Individual_Q	1.0	0.05	2500000	5	True
IndivQLearningParticle/46_4_6	none		True	-10	True	ParticleMomentum	True	False	10	-30	Individual_Q	1.0	0.05	2500000	6	True
IndivQLearningParticle/47_4_7	none		True	-10	True	ParticleMomentum	True	False	10	-30	Individual_Q	1.0	0.05	2500000	7	True
IndivQLearningParticle/48_4_8	none		True	-10	True	ParticleMomentum	True	False	10	-30	Individual_Q	1.0	0.05	2500000	8	True
IndivQLearningParticle/49_4_9	none		True	-10	True	ParticleMomentum	True	False	10	-30	Individual_Q	1.0	0.05	2500000	9	True
IndivQLearningParticle/50_5_0	none		True	-10	True	ParticleMomentum	False	False	10	-30	Individual_Q	1.0	0.05	2500000	0	True
IndivQLearningParticle/51_5_1	none		True	-10	True	ParticleMomentum	False	False	10	-30	Individual_Q	1.0	0.05	2500000	1	True
IndivQLearningParticle/52_5_2	none		True	-10	True	ParticleMomentum	False	False	10	-30	Individual_Q	1.0	0.05	2500000	2	True
IndivQLearningParticle/53_5_3	none		True	-10	True	ParticleMomentum	False	False	10	-30	Individual_Q	1.0	0.05	2500000	3	True
IndivQLearningParticle/54_5_4	none		True	-10	True	ParticleMomentum	False	False	10	-30	Individual_Q	1.0	0.05	2500000	4	True
IndivQLearningParticle/55_5_5	none		True	-10	True	ParticleMomentum	False	False	10	-30	Individual_Q	1.0	0.05	2500000	5	True
IndivQLearningParticle/56_5_6	none		True	-10	True	ParticleMomentum	False	False	10	-30	Individual_Q	1.0	0.05	2500000	6	True
IndivQLearningParticle/57_5_7	none		True	-10	True	ParticleMomentum	False	False	10	-30	Individual_Q	1.0	0.05	2500000	7	True
IndivQLearningParticle/58_5_8	none		True	-10	True	ParticleMomentum	False	False	10	-30	Individual_Q	1.0	0.05	2500000	8	True
IndivQLearningParticle/59_5_9	none		True	-10	True	ParticleMomentum	False	False	10	-30	Individual_Q	1.0	0.05	2500000	9	True
IndivQLearningParticle/60_6_0	slugs_centralized	shields/momentum_shield	True	-10	False	ParticleMomentum	True	False	10	-30	Individual_Q	1.0	0.05	2500000	0	True
IndivQLearningParticle/61_6_1	slugs_centralized	shields/momentum_shield	True	-10	False	ParticleMomentum	True	False	10	-30	Individual_Q	1.0	0.05	2500000	1	True
IndivQLearningParticle/62_6_2	slugs_centralized	shields/momentum_shield	True	-10	False	ParticleMomentum	True	False	10	-30	Individual_Q	1.0	0.05	2500000	2	True
IndivQLearningParticle/63_6_3	slugs_centralized	shields/momentum_shield	True	-10	False	ParticleMomentum	True	False	10	-30	Individual_Q	1.0	0.05	2500000	3	True
IndivQLearningParticle/64_6_4	slugs_centralized	shields/momentum_shield	True	-10	False	ParticleMomentum	True	False	10	-30	Individual_Q	1.0	0.05	2500000	4	True
IndivQLearningParticle/65_6_5	slugs_centralized	shields/momentum_shield	True	-10	False	ParticleMomentum	True	False	10	-30	Individual_Q	1.0	0.05	2500000	5	True
IndivQLearningParticle/66_6_6	slugs_centralized	shields/momentum_shield	True	-10	False	ParticleMomentum	True	False	10	-30	Individual_Q	1.0	0.05	2500000	6	True
IndivQLearningParticle/67_6_7	slugs_centralized	shields/momentum_shield	True	-10	False	ParticleMomentum	True	False	10	-30	Individual_Q	1.0	0.05	2500000	7	True
IndivQLearningParticle/68_6_8	slugs_centralized	shields/momentum_shield	True	-10	False	ParticleMomentum	True	False	10	-30	Individual_Q	1.0	0.05	2500000	8	True
IndivQLearningParticle/69_6_9	slugs_centralized	shields/momentum_shield	True	-10	False	ParticleMomentum	True	False	10	-30	Individual_Q	1.0	0.05	2500000	9	True
IndivQLearningParticle/70_7_0	slugs_centralized	shields/momentum_shield	True	-10	False	ParticleMomentum	False	False	10	-30	Individual_Q	1.0	0.05	2500000	0	True
IndivQLearningParticle/71_7_1	slugs_centralized	shields/momentum_shield	True	-10	False	ParticleMomentum	False	False	10	-30	Individual_Q	1.0	0.05	2500000	1	True
IndivQLearningParticle/72_7_2	slugs_centralized	shields/momentum_shield	True	-10	False	ParticleMomentum	False	False	10	-30	Individual_Q	1.0	0.05	2500000	2	True
IndivQLearningParticle/73_7_3	slugs_centralized	shields/momentum_shield	True	-10	False	ParticleMomentum	False	False	10	-30	Individual_Q	1.0	0.05	2500000	3	True
IndivQLearningParticle/74_7_4	slugs_centralized	shields/momentum_shield	True	-10	False	ParticleMomentum	False	False	10	-30	Individual_Q	1.0	0.05	2500000	4	True
IndivQLearningParticle/75_7_5	slugs_centralized	shields/momentum_shield	True	-10	False	ParticleMomentum	False	False	10	-30	Individual_Q	1.0	0.05	2500000	5	True
IndivQLearningParticle/76_7_6	slugs_centralized	shields/momentum_shield	True	-10	False	ParticleMomentum	False	False	10	-30	Individual_Q	1.0	0.05	2500000	6	True
IndivQLearningParticle/77_7_7	slugs_centralized	shields/momentum_shield	True	-10	False	ParticleMomentum	False	False	10	-30	Individual_Q	1.0	0.05	2500000	7	True
IndivQLearningParticle/78_7_8	slugs_centralized	shields/momentum_shield	True	-10	False	ParticleMomentum	False	False	10	-30	Individual_Q	1.0	0.05	2500000	8	True
IndivQLearningParticle/79_7_9	slugs_centralized	shields/momentum_shield	True	-10	False	ParticleMomentum	False	False	10	-30	Individual_Q	1.0	0.05	2500000	9	True
IndivQLearningParticle/80_8_0	slugs_decentralized	shields/momentum_shield	True	-10	False	ParticleMomentum	True	False	10	-30	Individual_Q	1.0	0.05	2500000	0	True
IndivQLearningParticle/81_8_1	slugs_decentralized	shields/momentum_shield	True	-10	False	ParticleMomentum	True	False	10	-30	Individual_Q	1.0	0.05	2500000	1	True
IndivQLearningParticle/82_8_2	slugs_decentralized	shields/momentum_shield	True	-10	False	ParticleMomentum	True	False	10	-30	Individual_Q	1.0	0.05	2500000	2	True
IndivQLearningParticle/83_8_3	slugs_decentralized	shields/momentum_shield	True	-10	False	ParticleMomentum	True	False	10	-30	Individual_Q	1.0	0.05	2500000	3	True
IndivQLearningParticle/84_8_4	slugs_decentralized	shields/momentum_shield	True	-10	False	ParticleMomentum	True	False	10	-30	Individual_Q	1.0	0.05	2500000	4	True
IndivQLearningParticle/85_8_5	slugs_decentralized	shields/momentum_shield	True	-10	False	ParticleMomentum	True	False	10	-30	Individual_Q	1.0	0.05	2500000	5	True
IndivQLearningParticle/86_8_6	slugs_decentralized	shields/momentum_shield	True	-10	False	ParticleMomentum	True	False	10	-30	Individual_Q	1.0	0.05	2500000	6	True
IndivQLearningParticle/87_8_7	slugs_decentralized	shields/momentum_shield	True	-10	False	ParticleMomentum	True	False	10	-30	Individual_Q	1.0	0.05	2500000	7	True
IndivQLearningParticle/88_8_8	slugs_decentralized	shields/momentum_shield	True	-10	False	ParticleMomentum	True	False	10	-30	Individual_Q	1.0	0.05	2500000	8	True
IndivQLearningParticle/89_8_9	slugs_decentralized	shields/momentum_shield	True	-10	False	ParticleMomentum	True	False	10	-30	Individual_Q	1.0	0.05	2500000	9	True
IndivQLearningParticle/90_9_0	slugs_decentralized	shields/momentum_shield	True	-10	False	ParticleMomentum	False	False	10	-30	Individual_Q	1.0	0.05	2500000	0	True
IndivQLearningParticle/91_9_1	slugs_decentralized	shields/momentum_shield	True	-10	False	ParticleMomentum	False	False	10	-30	Individual_Q	1.0	0.05	2500000	1	True
IndivQLearningParticle/92_9_2	slugs_decentralized	shields/momentum_shield	True	-10	False	ParticleMomentum	False	False	10	-30	Individual_Q	1.0	0.05	2500000	2	True
IndivQLearningParticle/93_9_3	slugs_decentralized	shields/momentum_shield	True	-10	False	ParticleMomentum	False	False	10	-30	Individual_Q	1.0	0.05	2500000	3	True
IndivQLearningParticle/94_9_4	slugs_decentralized	shields/momentum_shield	True	-10	False	ParticleMomentum	False	False	10	-30	Individual_Q	1.0	0.05	2500000	4	True
IndivQLearningParticle/95_9_5	slugs_decentralized	shields/momentum_shield	True	-10	False	ParticleMomentum	False	False	10	-30	Individual_Q	1.0	0.05	2500000	5	True
IndivQLearningParticle/96_9_6	slugs_decentralized	shields/momentum_shield	True	-10	False	ParticleMomentum	False	False	10	-30	Individual_Q	1.0	0.05	2500000	6	True
IndivQLearningParticle/97_9_7	slugs_decentralized	shields/momentum_shield	True	-10	False	ParticleMomentum	False	False	10	-30	Individual_Q	1.0	0.05	2500000	7	True
IndivQLearningParticle/98_9_8	slugs_decentralized	shields/momentum_shield	True	-10	False	ParticleMomentum	False	False	10	-30	Individual_Q	1.0	0.05	2500000	8	True
IndivQLearningParticle/99_9_9	slugs_decentralized	shields/momentum_shield	True	-10	False	ParticleMomentum	False	False	10	-30	Individual_Q	1.0	0.05	2500000	9	True
IndivQLearningParticle/100_10_0	none		True	-10	False	ParticleMomentum	True	False	10	-30	Individual_Q	1.0	0.05	2500000	0	True
IndivQLearningParticle/101_10_1	none		True	-10	False	ParticleMomentum	True	False	10	-30	Individual_Q	1.0	0.05	2500000	1	True
IndivQLearningParticle/102_10_2	none		True	-10	False	ParticleMomentum	True	False	10	-30	Individual_Q	1.0	0.05	2500000	2	True
IndivQLearningParticle/103_10_3	none		True	-10	False	ParticleMomentum	True	False	10	-30	Individual_Q	1.0	0.05	2500000	3	True
IndivQLearningParticle/104_10_4	none		True	-10	False	ParticleMomentum	True	False	10	-30	Individual_Q	1.0	0.05	2500000	4	True
IndivQLearningParticle/105_10_5	none		True	-10	False	ParticleMomentum	True	False	10	-30	Individual_Q	1.0	0.05	2500000	5	True
IndivQLearningParticle/106_10_6	none		True	-10	False	ParticleMomentum	True	False	10	-30	Individual_Q	1.0	0.05	2500000	6	True
IndivQLearningParticle/107_10_7	none		True	-10	False	ParticleMomentum	True	False	10	-30	Individual_Q	1.0	0.05	2500000	7	True
IndivQLearningParticle/108_10_8	none		True	-10	False	ParticleMomentum	True	False	10	-30	Individual_Q	1.0	0.05	2500000	8	True
IndivQLearningParticle/109_10_9	none		True	-10	False	ParticleMomentum	True	False	10	-30	Individual_Q	1.0	0.05	2500000	9	True
IndivQLearningParticle/110_11_0	none		True	-10	False	ParticleMomentum	False	False	10	-30	Individual_Q	1.0	0.05	2500000	0	True
IndivQLearningParticle/111_11_1	none		True	-10	False	ParticleMomentum	False	False	10	-30	Individual_Q	1.0	0.05	2500000	1	True
IndivQLearningParticle/112_11_2	none		True	-10	False	ParticleMomentum	False	False	10	-30	Individual_Q	1.0	0.05	2500000	2	True
IndivQLearningParticle/113_11_3	none		True	-10	False	ParticleMomentum	False	False	10	-30	Individual_Q	1.0	0.05	2500000	3	True
IndivQLearningParticle/114_11_4	none		True	-10	False	ParticleMomentum	False	False	10	-30	Individual_Q	1.0	0.05	2500000	4	True
IndivQLearningParticle/115_11_5	none		True	-10	False	ParticleMomentum	False	False	10	-30	Individual_Q	1.0	0.05	2500000	5	True
IndivQLearningParticle/116_11_6	none		True	-10	False	ParticleMomentum	False	False	10	-30	Individual_Q	1.0	0.05	2500000	6	True
IndivQLearningParticle/117_11_7	none		True	-10	False	ParticleMomentum	False	False	10	-30	Individual_Q	1.0	0.05	2500000	7	True
IndivQLearningParticle/118_11_8	none		True	-10	False	ParticleMomentum	False	False	10	-30	Individual_Q	1.0	0.05	2500000	8	True
IndivQLearningParticle/119_11_9	none		True	-10	False	ParticleMomentum	False	False	10	-30	Individual_Q	1.0	0.05	2500000	9	True
