# Supplementary material
Source: ML conference proceedings conference paper supplement (https://proceedings.neurips.cc/paper_files/paper/2022/hash/57444e14ecd9e2c8f603b4f012ce3811-Abstract.html)
Supplement: Supplementary file 1 [file 57444e14ecd9e2c8f603b4f012ce3811-Supplemental-Conference.zip › 3410_shield_decentralization_for_sa-Supplementary Material/parallel_configs/IndivQLearningReproTest.csv]

run_name	shield	punish_unsafe_orig_action	punish_unsafe_orig_action_modifier	randomize_starts	map_type	grid_world_map_name	grid_world_obs_type	learner_type	learner_anneal_eps_start	learner_anneal_eps_finish	max_total_steps	seed
IndivQLearningReproTest/0_0_0	centralized	False	0	True	GridWorld	Pentagon	PartialObsDiscrete	Individual_Q	0.2	0.2	1000000	0
IndivQLearningReproTest/1_0_1	centralized	False	0	True	GridWorld	Pentagon	PartialObsDiscrete	Individual_Q	0.2	0.2	1000000	0
IndivQLearningReproTest/2_0_2	centralized	False	0	True	GridWorld	Pentagon	PartialObsDiscrete	Individual_Q	0.2	0.2	1000000	0
