# Supplementary material
Source: ML conference proceedings conference paper supplement (https://proceedings.neurips.cc/paper_files/paper/2022/hash/57444e14ecd9e2c8f603b4f012ce3811-Abstract.html)
Supplement: Supplementary file 1 [file 57444e14ecd9e2c8f603b4f012ce3811-Supplemental-Conference.zip › 3410_shield_decentralization_for_sa-Supplementary Material/parallel_configs/IndivQLearningSlugs1kEval.csv]

run_name	shield	shield_specification	punish_unsafe_orig_action	punish_unsafe_orig_action_modifier	randomize_starts	map_type	grid_world_map_name	grid_world_obs_type	learner_type	learner_anneal_eps_start	learner_anneal_eps_finish	max_num_episodes	seed	skip_training	evaluation_run_name	evaluation_shield	evaluation_shield_specification	learner_evaluation_epsilon
IndivQLearningSlugs1k/0_0_0	slugs_centralized	shields/general_shield	True	-10	True	GridWorld	Pentagon	FullObsDiscrete	Individual_Q	1.0	0.05	1000	0	True	IndivQLearningSlugs1k/0_0_0_slugs_centralized	slugs_centralized	shields/general_shield	0.05
IndivQLearningSlugs1k/0_0_0	slugs_centralized	shields/general_shield	True	-10	True	GridWorld	Pentagon	FullObsDiscrete	Individual_Q	1.0	0.05	1000	0	True	IndivQLearningSlugs1k/0_0_0_slugs_decentralized	slugs_decentralized	shields/general_shield	0.05
IndivQLearningSlugs1k/0_0_0	slugs_centralized	shields/general_shield	True	-10	True	GridWorld	Pentagon	FullObsDiscrete	Individual_Q	1.0	0.05	1000	0	True	IndivQLearningSlugs1k/0_0_0_none	none		0.05
IndivQLearningSlugs1k/1_0_1	slugs_centralized	shields/general_shield	True	-10	True	GridWorld	Pentagon	FullObsDiscrete	Individual_Q	1.0	0.05	1000	1	True	IndivQLearningSlugs1k/1_0_1_slugs_centralized	slugs_centralized	shields/general_shield	0.05
IndivQLearningSlugs1k/1_0_1	slugs_centralized	shields/general_shield	True	-10	True	GridWorld	Pentagon	FullObsDiscrete	Individual_Q	1.0	0.05	1000	1	True	IndivQLearningSlugs1k/1_0_1_slugs_decentralized	slugs_decentralized	shields/general_shield	0.05
IndivQLearningSlugs1k/1_0_1	slugs_centralized	shields/general_shield	True	-10	True	GridWorld	Pentagon	FullObsDiscrete	Individual_Q	1.0	0.05	1000	1	True	IndivQLearningSlugs1k/1_0_1_none	none		0.05
IndivQLearningSlugs1k/2_0_2	slugs_centralized	shields/general_shield	True	-10	True	GridWorld	Pentagon	FullObsDiscrete	Individual_Q	1.0	0.05	1000	2	True	IndivQLearningSlugs1k/2_0_2_slugs_centralized	slugs_centralized	shields/general_shield	0.05
IndivQLearningSlugs1k/2_0_2	slugs_centralized	shields/general_shield	True	-10	True	GridWorld	Pentagon	FullObsDiscrete	Individual_Q	1.0	0.05	1000	2	True	IndivQLearningSlugs1k/2_0_2_slugs_decentralized	slugs_decentralized	shields/general_shield	0.05
IndivQLearningSlugs1k/2_0_2	slugs_centralized	shields/general_shield	True	-10	True	GridWorld	Pentagon	FullObsDiscrete	Individual_Q	1.0	0.05	1000	2	True	IndivQLearningSlugs1k/2_0_2_none	none		0.05
IndivQLearningSlugs1k/3_0_3	slugs_centralized	shields/general_shield	True	-10	True	GridWorld	Pentagon	FullObsDiscrete	Individual_Q	1.0	0.05	1000	3	True	IndivQLearningSlugs1k/3_0_3_slugs_centralized	slugs_centralized	shields/general_shield	0.05
IndivQLearningSlugs1k/3_0_3	slugs_centralized	shields/general_shield	True	-10	True	GridWorld	Pentagon	FullObsDiscrete	Individual_Q	1.0	0.05	1000	3	True	IndivQLearningSlugs1k/3_0_3_slugs_decentralized	slugs_decentralized	shields/general_shield	0.05
IndivQLearningSlugs1k/3_0_3	slugs_centralized	shields/general_shield	True	-10	True	GridWorld	Pentagon	FullObsDiscrete	Individual_Q	1.0	0.05	1000	3	True	IndivQLearningSlugs1k/3_0_3_none	none		0.05
IndivQLearningSlugs1k/4_0_4	slugs_centralized	shields/general_shield	True	-10	True	GridWorld	Pentagon	FullObsDiscrete	Individual_Q	1.0	0.05	1000	4	True	IndivQLearningSlugs1k/4_0_4_slugs_centralized	slugs_centralized	shields/general_shield	0.05
IndivQLearningSlugs1k/4_0_4	slugs_centralized	shields/general_shield	True	-10	True	GridWorld	Pentagon	FullObsDiscrete	Individual_Q	1.0	0.05	1000	4	True	IndivQLearningSlugs1k/4_0_4_slugs_decentralized	slugs_decentralized	shields/general_shield	0.05
IndivQLearningSlugs1k/4_0_4	slugs_centralized	shields/general_shield	True	-10	True	GridWorld	Pentagon	FullObsDiscrete	Individual_Q	1.0	0.05	1000	4	True	IndivQLearningSlugs1k/4_0_4_none	none		0.05
IndivQLearningSlugs1k/5_0_5	slugs_centralized	shields/general_shield	True	-10	True	GridWorld	Pentagon	FullObsDiscrete	Individual_Q	1.0	0.05	1000	5	True	IndivQLearningSlugs1k/5_0_5_slugs_centralized	slugs_centralized	shields/general_shield	0.05
IndivQLearningSlugs1k/5_0_5	slugs_centralized	shields/general_shield	True	-10	True	GridWorld	Pentagon	FullObsDiscrete	Individual_Q	1.0	0.05	1000	5	True	IndivQLearningSlugs1k/5_0_5_slugs_decentralized	slugs_decentralized	shields/general_shield	0.05
IndivQLearningSlugs1k/5_0_5	slugs_centralized	shields/general_shield	True	-10	True	GridWorld	Pentagon	FullObsDiscrete	Individual_Q	1.0	0.05	1000	5	True	IndivQLearningSlugs1k/5_0_5_none	none		0.05
IndivQLearningSlugs1k/6_0_6	slugs_centralized	shields/general_shield	True	-10	True	GridWorld	Pentagon	FullObsDiscrete	Individual_Q	1.0	0.05	1000	6	True	IndivQLearningSlugs1k/6_0_6_slugs_centralized	slugs_centralized	shields/general_shield	0.05
IndivQLearningSlugs1k/6_0_6	slugs_centralized	shields/general_shield	True	-10	True	GridWorld	Pentagon	FullObsDiscrete	Individual_Q	1.0	0.05	1000	6	True	IndivQLearningSlugs1k/6_0_6_slugs_decentralized	slugs_decentralized	shields/general_shield	0.05
IndivQLearningSlugs1k/6_0_6	slugs_centralized	shields/general_shield	True	-10	True	GridWorld	Pentagon	FullObsDiscrete	Individual_Q	1.0	0.05	1000	6	True	IndivQLearningSlugs1k/6_0_6_none	none		0.05
IndivQLearningSlugs1k/7_0_7	slugs_centralized	shields/general_shield	True	-10	True	GridWorld	Pentagon	FullObsDiscrete	Individual_Q	1.0	0.05	1000	7	True	IndivQLearningSlugs1k/7_0_7_slugs_centralized	slugs_centralized	shields/general_shield	0.05
IndivQLearningSlugs1k/7_0_7	slugs_centralized	shields/general_shield	True	-10	True	GridWorld	Pentagon	FullObsDiscrete	Individual_Q	1.0	0.05	1000	7	True	IndivQLearningSlugs1k/7_0_7_slugs_decentralized	slugs_decentralized	shields/general_shield	0.05
IndivQLearningSlugs1k/7_0_7	slugs_centralized	shields/general_shield	True	-10	True	GridWorld	Pentagon	FullObsDiscrete	Individual_Q	1.0	0.05	1000	7	True	IndivQLearningSlugs1k/7_0_7_none	none		0.05
IndivQLearningSlugs1k/8_0_8	slugs_centralized	shields/general_shield	True	-10	True	GridWorld	Pentagon	FullObsDiscrete	Individual_Q	1.0	0.05	1000	8	True	IndivQLearningSlugs1k/8_0_8_slugs_centralized	slugs_centralized	shields/general_shield	0.05
IndivQLearningSlugs1k/8_0_8	slugs_centralized	shields/general_shield	True	-10	True	GridWorld	Pentagon	FullObsDiscrete	Individual_Q	1.0	0.05	1000	8	True	IndivQLearningSlugs1k/8_0_8_slugs_decentralized	slugs_decentralized	shields/general_shield	0.05
IndivQLearningSlugs1k/8_0_8	slugs_centralized	shields/general_shield	True	-10	True	GridWorld	Pentagon	FullObsDiscrete	Individual_Q	1.0	0.05	1000	8	True	IndivQLearningSlugs1k/8_0_8_none	none		0.05
IndivQLearningSlugs1k/9_0_9	slugs_centralized	shields/general_shield	True	-10	True	GridWorld	Pentagon	FullObsDiscrete	Individual_Q	1.0	0.05	1000	9	True	IndivQLearningSlugs1k/9_0_9_slugs_centralized	slugs_centralized	shields/general_shield	0.05
IndivQLearningSlugs1k/9_0_9	slugs_centralized	shields/general_shield	True	-10	True	GridWorld	Pentagon	FullObsDiscrete	Individual_Q	1.0	0.05	1000	9	True	IndivQLearningSlugs1k/9_0_9_slugs_decentralized	slugs_decentralized	shields/general_shield	0.05
IndivQLearningSlugs1k/9_0_9	slugs_centralized	shields/general_shield	True	-10	True	GridWorld	Pentagon	FullObsDiscrete	Individual_Q	1.0	0.05	1000	9	True	IndivQLearningSlugs1k/9_0_9_none	none		0.05
IndivQLearningSlugs1k/10_1_0	slugs_decentralized	shields/general_shield	True	-10	True	GridWorld	Pentagon	FullObsDiscrete	Individual_Q	1.0	0.05	1000	0	True	IndivQLearningSlugs1k/10_1_0_slugs_centralized	slugs_centralized	shields/general_shield	0.05
IndivQLearningSlugs1k/10_1_0	slugs_decentralized	shields/general_shield	True	-10	True	GridWorld	Pentagon	FullObsDiscrete	Individual_Q	1.0	0.05	1000	0	True	IndivQLearningSlugs1k/10_1_0_slugs_decentralized	slugs_decentralized	shields/general_shield	0.05
IndivQLearningSlugs1k/10_1_0	slugs_decentralized	shields/general_shield	True	-10	True	GridWorld	Pentagon	FullObsDiscrete	Individual_Q	1.0	0.05	1000	0	True	IndivQLearningSlugs1k/10_1_0_none	none		0.05
IndivQLearningSlugs1k/11_1_1	slugs_decentralized	shields/general_shield	True	-10	True	GridWorld	Pentagon	FullObsDiscrete	Individual_Q	1.0	0.05	1000	1	True	IndivQLearningSlugs1k/11_1_1_slugs_centralized	slugs_centralized	shields/general_shield	0.05
IndivQLearningSlugs1k/11_1_1	slugs_decentralized	shields/general_shield	True	-10	True	GridWorld	Pentagon	FullObsDiscrete	Individual_Q	1.0	0.05	1000	1	True	IndivQLearningSlugs1k/11_1_1_slugs_decentralized	slugs_decentralized	shields/general_shield	0.05
IndivQLearningSlugs1k/11_1_1	slugs_decentralized	shields/general_shield	True	-10	True	GridWorld	Pentagon	FullObsDiscrete	Individual_Q	1.0	0.05	1000	1	True	IndivQLearningSlugs1k/11_1_1_none	none		0.05
IndivQLearningSlugs1k/12_1_2	slugs_decentralized	shields/general_shield	True	-10	True	GridWorld	Pentagon	FullObsDiscrete	Individual_Q	1.0	0.05	1000	2	True	IndivQLearningSlugs1k/12_1_2_slugs_centralized	slugs_centralized	shields/general_shield	0.05
IndivQLearningSlugs1k/12_1_2	slugs_decentralized	shields/general_shield	True	-10	True	GridWorld	Pentagon	FullObsDiscrete	Individual_Q	1.0	0.05	1000	2	True	IndivQLearningSlugs1k/12_1_2_slugs_decentralized	slugs_decentralized	shields/general_shield	0.05
IndivQLearningSlugs1k/12_1_2	slugs_decentralized	shields/general_shield	True	-10	True	GridWorld	Pentagon	FullObsDiscrete	Individual_Q	1.0	0.05	1000	2	True	IndivQLearningSlugs1k/12_1_2_none	none		0.05
IndivQLearningSlugs1k/13_1_3	slugs_decentralized	shields/general_shield	True	-10	True	GridWorld	Pentagon	FullObsDiscrete	Individual_Q	1.0	0.05	1000	3	True	IndivQLearningSlugs1k/13_1_3_slugs_centralized	slugs_centralized	shields/general_shield	0.05
IndivQLearningSlugs1k/13_1_3	slugs_decentralized	shields/general_shield	True	-10	True	GridWorld	Pentagon	FullObsDiscrete	Individual_Q	1.0	0.05	1000	3	True	IndivQLearningSlugs1k/13_1_3_slugs_decentralized	slugs_decentralized	shields/general_shield	0.05
IndivQLearningSlugs1k/13_1_3	slugs_decentralized	shields/general_shield	True	-10	True	GridWorld	Pentagon	FullObsDiscrete	Individual_Q	1.0	0.05	1000	3	True	IndivQLearningSlugs1k/13_1_3_none	none		0.05
IndivQLearningSlugs1k/14_1_4	slugs_decentralized	shields/general_shield	True	-10	True	GridWorld	Pentagon	FullObsDiscrete	Individual_Q	1.0	0.05	1000	4	True	IndivQLearningSlugs1k/14_1_4_slugs_centralized	slugs_centralized	shields/general_shield	0.05
IndivQLearningSlugs1k/14_1_4	slugs_decentralized	shields/general_shield	True	-10	True	GridWorld	Pentagon	FullObsDiscrete	Individual_Q	1.0	0.05	1000	4	True	IndivQLearningSlugs1k/14_1_4_slugs_decentralized	slugs_decentralized	shields/general_shield	0.05
IndivQLearningSlugs1k/14_1_4	slugs_decentralized	shields/general_shield	True	-10	True	GridWorld	Pentagon	FullObsDiscrete	Individual_Q	1.0	0.05	1000	4	True	IndivQLearningSlugs1k/14_1_4_none	none		0.05
IndivQLearningSlugs1k/15_1_5	slugs_decentralized	shields/general_shield	True	-10	True	GridWorld	Pentagon	FullObsDiscrete	Individual_Q	1.0	0.05	1000	5	True	IndivQLearningSlugs1k/15_1_5_slugs_centralized	slugs_centralized	shields/general_shield	0.05
IndivQLearningSlugs1k/15_1_5	slugs_decentralized	shields/general_shield	True	-10	True	GridWorld	Pentagon	FullObsDiscrete	Individual_Q	1.0	0.05	1000	5	True	IndivQLearningSlugs1k/15_1_5_slugs_decentralized	slugs_decentralized	shields/general_shield	0.05
IndivQLearningSlugs1k/15_1_5	slugs_decentralized	shields/general_shield	True	-10	True	GridWorld	Pentagon	FullObsDiscrete	Individual_Q	1.0	0.05	1000	5	True	IndivQLearningSlugs1k/15_1_5_none	none		0.05
IndivQLearningSlugs1k/16_1_6	slugs_decentralized	shields/general_shield	True	-10	True	GridWorld	Pentagon	FullObsDiscrete	Individual_Q	1.0	0.05	1000	6	True	IndivQLearningSlugs1k/16_1_6_slugs_centralized	slugs_centralized	shields/general_shield	0.05
IndivQLearningSlugs1k/16_1_6	slugs_decentralized	shields/general_shield	True	-10	True	GridWorld	Pentagon	FullObsDiscrete	Individual_Q	1.0	0.05	1000	6	True	IndivQLearningSlugs1k/16_1_6_slugs_decentralized	slugs_decentralized	shields/general_shield	0.05
IndivQLearningSlugs1k/16_1_6	slugs_decentralized	shields/general_shield	True	-10	True	GridWorld	Pentagon	FullObsDiscrete	Individual_Q	1.0	0.05	1000	6	True	IndivQLearningSlugs1k/16_1_6_none	none		0.05
IndivQLearningSlugs1k/17_1_7	slugs_decentralized	shields/general_shield	True	-10	True	GridWorld	Pentagon	FullObsDiscrete	Individual_Q	1.0	0.05	1000	7	True	IndivQLearningSlugs1k/17_1_7_slugs_centralized	slugs_centralized	shields/general_shield	0.05
IndivQLearningSlugs1k/17_1_7	slugs_decentralized	shields/general_shield	True	-10	True	GridWorld	Pentagon	FullObsDiscrete	Individual_Q	1.0	0.05	1000	7	True	IndivQLearningSlugs1k/17_1_7_slugs_decentralized	slugs_decentralized	shields/general_shield	0.05
IndivQLearningSlugs1k/17_1_7	slugs_decentralized	shields/general_shield	True	-10	True	GridWorld	Pentagon	FullObsDiscrete	Individual_Q	1.0	0.05	1000	7	True	IndivQLearningSlugs1k/17_1_7_none	none		0.05
IndivQLearningSlugs1k/18_1_8	slugs_decentralized	shields/general_shield	True	-10	True	GridWorld	Pentagon	FullObsDiscrete	Individual_Q	1.0	0.05	1000	8	True	IndivQLearningSlugs1k/18_1_8_slugs_centralized	slugs_centralized	shields/general_shield	0.05
IndivQLearningSlugs1k/18_1_8	slugs_decentralized	shields/general_shield	True	-10	True	GridWorld	Pentagon	FullObsDiscrete	Individual_Q	1.0	0.05	1000	8	True	IndivQLearningSlugs1k/18_1_8_slugs_decentralized	slugs_decentralized	shields/general_shield	0.05
IndivQLearningSlugs1k/18_1_8	slugs_decentralized	shields/general_shield	True	-10	True	GridWorld	Pentagon	FullObsDiscrete	Individual_Q	1.0	0.05	1000	8	True	IndivQLearningSlugs1k/18_1_8_none	none		0.05
IndivQLearningSlugs1k/19_1_9	slugs_decentralized	shields/general_shield	True	-10	True	GridWorld	Pentagon	FullObsDiscrete	Individual_Q	1.0	0.05	1000	9	True	IndivQLearningSlugs1k/19_1_9_slugs_centralized	slugs_centralized	shields/general_shield	0.05
IndivQLearningSlugs1k/19_1_9	slugs_decentralized	shields/general_shield	True	-10	True	GridWorld	Pentagon	FullObsDiscrete	Individual_Q	1.0	0.05	1000	9	True	IndivQLearningSlugs1k/19_1_9_slugs_decentralized	slugs_decentralized	shields/general_shield	0.05
IndivQLearningSlugs1k/19_1_9	slugs_decentralized	shields/general_shield	True	-10	True	GridWorld	Pentagon	FullObsDiscrete	Individual_Q	1.0	0.05	1000	9	True	IndivQLearningSlugs1k/19_1_9_none	none		0.05
IndivQLearningSlugs1k/20_2_0	none		True	-10	True	GridWorld	Pentagon	FullObsDiscrete	Individual_Q	1.0	0.05	1000	0	True	IndivQLearningSlugs1k/20_2_0_slugs_centralized	slugs_centralized	shields/general_shield	0.05
IndivQLearningSlugs1k/20_2_0	none		True	-10	True	GridWorld	Pentagon	FullObsDiscrete	Individual_Q	1.0	0.05	1000	0	True	IndivQLearningSlugs1k/20_2_0_slugs_decentralized	slugs_decentralized	shields/general_shield	0.05
IndivQLearningSlugs1k/20_2_0	none		True	-10	True	GridWorld	Pentagon	FullObsDiscrete	Individual_Q	1.0	0.05	1000	0	True	IndivQLearningSlugs1k/20_2_0_none	none		0.05
IndivQLearningSlugs1k/21_2_1	none		True	-10	True	GridWorld	Pentagon	FullObsDiscrete	Individual_Q	1.0	0.05	1000	1	True	IndivQLearningSlugs1k/21_2_1_slugs_centralized	slugs_centralized	shields/general_shield	0.05
IndivQLearningSlugs1k/21_2_1	none		True	-10	True	GridWorld	Pentagon	FullObsDiscrete	Individual_Q	1.0	0.05	1000	1	True	IndivQLearningSlugs1k/21_2_1_slugs_decentralized	slugs_decentralized	shields/general_shield	0.05
IndivQLearningSlugs1k/21_2_1	none		True	-10	True	GridWorld	Pentagon	FullObsDiscrete	Individual_Q	1.0	0.05	1000	1	True	IndivQLearningSlugs1k/21_2_1_none	none		0.05
IndivQLearningSlugs1k/22_2_2	none		True	-10	True	GridWorld	Pentagon	FullObsDiscrete	Individual_Q	1.0	0.05	1000	2	True	IndivQLearningSlugs1k/22_2_2_slugs_centralized	slugs_centralized	shields/general_shield	0.05
IndivQLearningSlugs1k/22_2_2	none		True	-10	True	GridWorld	Pentagon	FullObsDiscrete	Individual_Q	1.0	0.05	1000	2	True	IndivQLearningSlugs1k/22_2_2_slugs_decentralized	slugs_decentralized	shields/general_shield	0.05
IndivQLearningSlugs1k/22_2_2	none		True	-10	True	GridWorld	Pentagon	FullObsDiscrete	Individual_Q	1.0	0.05	1000	2	True	IndivQLearningSlugs1k/22_2_2_none	none		0.05
IndivQLearningSlugs1k/23_2_3	none		True	-10	True	GridWorld	Pentagon	FullObsDiscrete	Individual_Q	1.0	0.05	1000	3	True	IndivQLearningSlugs1k/23_2_3_slugs_centralized	slugs_centralized	shields/general_shield	0.05
IndivQLearningSlugs1k/23_2_3	none		True	-10	True	GridWorld	Pentagon	FullObsDiscrete	Individual_Q	1.0	0.05	1000	3	True	IndivQLearningSlugs1k/23_2_3_slugs_decentralized	slugs_decentralized	shields/general_shield	0.05
IndivQLearningSlugs1k/23_2_3	none		True	-10	True	GridWorld	Pentagon	FullObsDiscrete	Individual_Q	1.0	0.05	1000	3	True	IndivQLearningSlugs1k/23_2_3_none	none		0.05
IndivQLearningSlugs1k/24_2_4	none		True	-10	True	GridWorld	Pentagon	FullObsDiscrete	Individual_Q	1.0	0.05	1000	4	True	IndivQLearningSlugs1k/24_2_4_slugs_centralized	slugs_centralized	shields/general_shield	0.05
IndivQLearningSlugs1k/24_2_4	none		True	-10	True	GridWorld	Pentagon	FullObsDiscrete	Individual_Q	1.0	0.05	1000	4	True	IndivQLearningSlugs1k/24_2_4_slugs_decentralized	slugs_decentralized	shields/general_shield	0.05
IndivQLearningSlugs1k/24_2_4	none		True	-10	True	GridWorld	Pentagon	FullObsDiscrete	Individual_Q	1.0	0.05	1000	4	True	IndivQLearningSlugs1k/24_2_4_none	none		0.05
IndivQLearningSlugs1k/25_2_5	none		True	-10	True	GridWorld	Pentagon	FullObsDiscrete	Individual_Q	1.0	0.05	1000	5	True	IndivQLearningSlugs1k/25_2_5_slugs_centralized	slugs_centralized	shields/general_shield	0.05
IndivQLearningSlugs1k/25_2_5	none		True	-10	True	GridWorld	Pentagon	FullObsDiscrete	Individual_Q	1.0	0.05	1000	5	True	IndivQLearningSlugs1k/25_2_5_slugs_decentralized	slugs_decentralized	shields/general_shield	0.05
IndivQLearningSlugs1k/25_2_5	none		True	-10	True	GridWorld	Pentagon	FullObsDiscrete	Individual_Q	1.0	0.05	1000	5	True	IndivQLearningSlugs1k/25_2_5_none	none		0.05
IndivQLearningSlugs1k/26_2_6	none		True	-10	True	GridWorld	Pentagon	FullObsDiscrete	Individual_Q	1.0	0.05	1000	6	True	IndivQLearningSlugs1k/26_2_6_slugs_centralized	slugs_centralized	shields/general_shield	0.05
IndivQLearningSlugs1k/26_2_6	none		True	-10	True	GridWorld	Pentagon	FullObsDiscrete	Individual_Q	1.0	0.05	1000	6	True	IndivQLearningSlugs1k/26_2_6_slugs_decentralized	slugs_decentralized	shields/general_shield	0.05
IndivQLearningSlugs1k/26_2_6	none		True	-10	True	GridWorld	Pentagon	FullObsDiscrete	Individual_Q	1.0	0.05	1000	6	True	IndivQLearningSlugs1k/26_2_6_none	none		0.05
IndivQLearningSlugs1k/27_2_7	none		True	-10	True	GridWorld	Pentagon	FullObsDiscrete	Individual_Q	1.0	0.05	1000	7	True	IndivQLearningSlugs1k/27_2_7_slugs_centralized	slugs_centralized	shields/general_shield	0.05
IndivQLearningSlugs1k/27_2_7	none		True	-10	True	GridWorld	Pentagon	FullObsDiscrete	Individual_Q	1.0	0.05	1000	7	True	IndivQLearningSlugs1k/27_2_7_slugs_decentralized	slugs_decentralized	shields/general_shield	0.05
IndivQLearningSlugs1k/27_2_7	none		True	-10	True	GridWorld	Pentagon	FullObsDiscrete	Individual_Q	1.0	0.05	1000	7	True	IndivQLearningSlugs1k/27_2_7_none	none		0.05
IndivQLearningSlugs1k/28_2_8	none		True	-10	True	GridWorld	Pentagon	FullObsDiscrete	Individual_Q	1.0	0.05	1000	8	True	IndivQLearningSlugs1k/28_2_8_slugs_centralized	slugs_centralized	shields/general_shield	0.05
IndivQLearningSlugs1k/28_2_8	none		True	-10	True	GridWorld	Pentagon	FullObsDiscrete	Individual_Q	1.0	0.05	1000	8	True	IndivQLearningSlugs1k/28_2_8_slugs_decentralized	slugs_decentralized	shields/general_shield	0.05
IndivQLearningSlugs1k/28_2_8	none		True	-10	True	GridWorld	Pentagon	FullObsDiscrete	Individual_Q	1.0	0.05	1000	8	True	IndivQLearningSlugs1k/28_2_8_none	none		0.05
IndivQLearningSlugs1k/29_2_9	none		True	-10	True	GridWorld	Pentagon	FullObsDiscrete	Individual_Q	1.0	0.05	1000	9	True	IndivQLearningSlugs1k/29_2_9_slugs_centralized	slugs_centralized	shields/general_shield	0.05
IndivQLearningSlugs1k/29_2_9	none		True	-10	True	GridWorld	Pentagon	FullObsDiscrete	Individual_Q	1.0	0.05	1000	9	True	IndivQLearningSlugs1k/29_2_9_slugs_decentralized	slugs_decentralized	shields/general_shield	0.05
IndivQLearningSlugs1k/29_2_9	none		True	-10	True	GridWorld	Pentagon	FullObsDiscrete	Individual_Q	1.0	0.05	1000	9	True	IndivQLearningSlugs1k/29_2_9_none	none		0.05
IndivQLearningSlugs1k/30_3_0	slugs_centralized	shields/general_shield	True	-10	False	GridWorld	Pentagon	FullObsDiscrete	Individual_Q	1.0	0.05	1000	0	True	IndivQLearningSlugs1k/30_3_0_slugs_centralized	slugs_centralized	shields/general_shield	0.05
IndivQLearningSlugs1k/30_3_0	slugs_centralized	shields/general_shield	True	-10	False	GridWorld	Pentagon	FullObsDiscrete	Individual_Q	1.0	0.05	1000	0	True	IndivQLearningSlugs1k/30_3_0_slugs_decentralized	slugs_decentralized	shields/general_shield	0.05
IndivQLearningSlugs1k/30_3_0	slugs_centralized	shields/general_shield	True	-10	False	GridWorld	Pentagon	FullObsDiscrete	Individual_Q	1.0	0.05	1000	0	True	IndivQLearningSlugs1k/30_3_0_none	none		0.05
IndivQLearningSlugs1k/31_3_1	slugs_centralized	shields/general_shield	True	-10	False	GridWorld	Pentagon	FullObsDiscrete	Individual_Q	1.0	0.05	1000	1	True	IndivQLearningSlugs1k/31_3_1_slugs_centralized	slugs_centralized	shields/general_shield	0.05
IndivQLearningSlugs1k/31_3_1	slugs_centralized	shields/general_shield	True	-10	False	GridWorld	Pentagon	FullObsDiscrete	Individual_Q	1.0	0.05	1000	1	True	IndivQLearningSlugs1k/31_3_1_slugs_decentralized	slugs_decentralized	shields/general_shield	0.05
IndivQLearningSlugs1k/31_3_1	slugs_centralized	shields/general_shield	True	-10	False	GridWorld	Pentagon	FullObsDiscrete	Individual_Q	1.0	0.05	1000	1	True	IndivQLearningSlugs1k/31_3_1_none	none		0.05
IndivQLearningSlugs1k/32_3_2	slugs_centralized	shields/general_shield	True	-10	False	GridWorld	Pentagon	FullObsDiscrete	Individual_Q	1.0	0.05	1000	2	True	IndivQLearningSlugs1k/32_3_2_slugs_centralized	slugs_centralized	shields/general_shield	0.05
IndivQLearningSlugs1k/32_3_2	slugs_centralized	shields/general_shield	True	-10	False	GridWorld	Pentagon	FullObsDiscrete	Individual_Q	1.0	0.05	1000	2	True	IndivQLearningSlugs1k/32_3_2_slugs_decentralized	slugs_decentralized	shields/general_shield	0.05
IndivQLearningSlugs1k/32_3_2	slugs_centralized	shields/general_shield	True	-10	False	GridWorld	Pentagon	FullObsDiscrete	Individual_Q	1.0	0.05	1000	2	True	IndivQLearningSlugs1k/32_3_2_none	none		0.05
IndivQLearningSlugs1k/33_3_3	slugs_centralized	shields/general_shield	True	-10	False	GridWorld	Pentagon	FullObsDiscrete	Individual_Q	1.0	0.05	1000	3	True	IndivQLearningSlugs1k/33_3_3_slugs_centralized	slugs_centralized	shields/general_shield	0.05
IndivQLearningSlugs1k/33_3_3	slugs_centralized	shields/general_shield	True	-10	False	GridWorld	Pentagon	FullObsDiscrete	Individual_Q	1.0	0.05	1000	3	True	IndivQLearningSlugs1k/33_3_3_slugs_decentralized	slugs_decentralized	shields/general_shield	0.05
IndivQLearningSlugs1k/33_3_3	slugs_centralized	shields/general_shield	True	-10	False	GridWorld	Pentagon	FullObsDiscrete	Individual_Q	1.0	0.05	1000	3	True	IndivQLearningSlugs1k/33_3_3_none	none		0.05
IndivQLearningSlugs1k/34_3_4	slugs_centralized	shields/general_shield	True	-10	False	GridWorld	Pentagon	FullObsDiscrete	Individual_Q	1.0	0.05	1000	4	True	IndivQLearningSlugs1k/34_3_4_slugs_centralized	slugs_centralized	shields/general_shield	0.05
IndivQLearningSlugs1k/34_3_4	slugs_centralized	shields/general_shield	True	-10	False	GridWorld	Pentagon	FullObsDiscrete	Individual_Q	1.0	0.05	1000	4	True	IndivQLearningSlugs1k/34_3_4_slugs_decentralized	slugs_decentralized	shields/general_shield	0.05
IndivQLearningSlugs1k/34_3_4	slugs_centralized	shields/general_shield	True	-10	False	GridWorld	Pentagon	FullObsDiscrete	Individual_Q	1.0	0.05	1000	4	True	IndivQLearningSlugs1k/34_3_4_none	none		0.05
IndivQLearningSlugs1k/35_3_5	slugs_centralized	shields/general_shield	True	-10	False	GridWorld	Pentagon	FullObsDiscrete	Individual_Q	1.0	0.05	1000	5	True	IndivQLearningSlugs1k/35_3_5_slugs_centralized	slugs_centralized	shields/general_shield	0.05
IndivQLearningSlugs1k/35_3_5	slugs_centralized	shields/general_shield	True	-10	False	GridWorld	Pentagon	FullObsDiscrete	Individual_Q	1.0	0.05	1000	5	True	IndivQLearningSlugs1k/35_3_5_slugs_decentralized	slugs_decentralized	shields/general_shield	0.05
IndivQLearningSlugs1k/35_3_5	slugs_centralized	shields/general_shield	True	-10	False	GridWorld	Pentagon	FullObsDiscrete	Individual_Q	1.0	0.05	1000	5	True	IndivQLearningSlugs1k/35_3_5_none	none		0.05
IndivQLearningSlugs1k/36_3_6	slugs_centralized	shields/general_shield	True	-10	False	GridWorld	Pentagon	FullObsDiscrete	Individual_Q	1.0	0.05	1000	6	True	IndivQLearningSlugs1k/36_3_6_slugs_centralized	slugs_centralized	shields/general_shield	0.05
IndivQLearningSlugs1k/36_3_6	slugs_centralized	shields/general_shield	True	-10	False	GridWorld	Pentagon	FullObsDiscrete	Individual_Q	1.0	0.05	1000	6	True	IndivQLearningSlugs1k/36_3_6_slugs_decentralized	slugs_decentralized	shields/general_shield	0.05
IndivQLearningSlugs1k/36_3_6	slugs_centralized	shields/general_shield	True	-10	False	GridWorld	Pentagon	FullObsDiscrete	Individual_Q	1.0	0.05	1000	6	True	IndivQLearningSlugs1k/36_3_6_none	none		0.05
IndivQLearningSlugs1k/37_3_7	slugs_centralized	shields/general_shield	True	-10	False	GridWorld	Pentagon	FullObsDiscrete	Individual_Q	1.0	0.05	1000	7	True	IndivQLearningSlugs1k/37_3_7_slugs_centralized	slugs_centralized	shields/general_shield	0.05
IndivQLearningSlugs1k/37_3_7	slugs_centralized	shields/general_shield	True	-10	False	GridWorld	Pentagon	FullObsDiscrete	Individual_Q	1.0	0.05	1000	7	True	IndivQLearningSlugs1k/37_3_7_slugs_decentralized	slugs_decentralized	shields/general_shield	0.05
IndivQLearningSlugs1k/37_3_7	slugs_centralized	shields/general_shield	True	-10	False	GridWorld	Pentagon	FullObsDiscrete	Individual_Q	1.0	0.05	1000	7	True	IndivQLearningSlugs1k/37_3_7_none	none		0.05
IndivQLearningSlugs1k/38_3_8	slugs_centralized	shields/general_shield	True	-10	False	GridWorld	Pentagon	FullObsDiscrete	Individual_Q	1.0	0.05	1000	8	True	IndivQLearningSlugs1k/38_3_8_slugs_centralized	slugs_centralized	shields/general_shield	0.05
IndivQLearningSlugs1k/38_3_8	slugs_centralized	shields/general_shield	True	-10	False	GridWorld	Pentagon	FullObsDiscrete	Individual_Q	1.0	0.05	1000	8	True	IndivQLearningSlugs1k/38_3_8_slugs_decentralized	slugs_decentralized	shields/general_shield	0.05
IndivQLearningSlugs1k/38_3_8	slugs_centralized	shields/general_shield	True	-10	False	GridWorld	Pentagon	FullObsDiscrete	Individual_Q	1.0	0.05	1000	8	True	IndivQLearningSlugs1k/38_3_8_none	none		0.05
IndivQLearningSlugs1k/39_3_9	slugs_centralized	shields/general_shield	True	-10	False	GridWorld	Pentagon	FullObsDiscrete	Individual_Q	1.0	0.05	1000	9	True	IndivQLearningSlugs1k/39_3_9_slugs_centralized	slugs_centralized	shields/general_shield	0.05
IndivQLearningSlugs1k/39_3_9	slugs_centralized	shields/general_shield	True	-10	False	GridWorld	Pentagon	FullObsDiscrete	Individual_Q	1.0	0.05	1000	9	True	IndivQLearningSlugs1k/39_3_9_slugs_decentralized	slugs_decentralized	shields/general_shield	0.05
IndivQLearningSlugs1k/39_3_9	slugs_centralized	shields/general_shield	True	-10	False	GridWorld	Pentagon	FullObsDiscrete	Individual_Q	1.0	0.05	1000	9	True	IndivQLearningSlugs1k/39_3_9_none	none		0.05
IndivQLearningSlugs1k/40_4_0	slugs_decentralized	shields/general_shield	True	-10	False	GridWorld	Pentagon	FullObsDiscrete	Individual_Q	1.0	0.05	1000	0	True	IndivQLearningSlugs1k/40_4_0_slugs_centralized	slugs_centralized	shields/general_shield	0.05
IndivQLearningSlugs1k/40_4_0	slugs_decentralized	shields/general_shield	True	-10	False	GridWorld	Pentagon	FullObsDiscrete	Individual_Q	1.0	0.05	1000	0	True	IndivQLearningSlugs1k/40_4_0_slugs_decentralized	slugs_decentralized	shields/general_shield	0.05
IndivQLearningSlugs1k/40_4_0	slugs_decentralized	shields/general_shield	True	-10	False	GridWorld	Pentagon	FullObsDiscrete	Individual_Q	1.0	0.05	1000	0	True	IndivQLearningSlugs1k/40_4_0_none	none		0.05
IndivQLearningSlugs1k/41_4_1	slugs_decentralized	shields/general_shield	True	-10	False	GridWorld	Pentagon	FullObsDiscrete	Individual_Q	1.0	0.05	1000	1	True	IndivQLearningSlugs1k/41_4_1_slugs_centralized	slugs_centralized	shields/general_shield	0.05
IndivQLearningSlugs1k/41_4_1	slugs_decentralized	shields/general_shield	True	-10	False	GridWorld	Pentagon	FullObsDiscrete	Individual_Q	1.0	0.05	1000	1	True	IndivQLearningSlugs1k/41_4_1_slugs_decentralized	slugs_decentralized	shields/general_shield	0.05
IndivQLearningSlugs1k/41_4_1	slugs_decentralized	shields/general_shield	True	-10	False	GridWorld	Pentagon	FullObsDiscrete	Individual_Q	1.0	0.05	1000	1	True	IndivQLearningSlugs1k/41_4_1_none	none		0.05
IndivQLearningSlugs1k/42_4_2	slugs_decentralized	shields/general_shield	True	-10	False	GridWorld	Pentagon	FullObsDiscrete	Individual_Q	1.0	0.05	1000	2	True	IndivQLearningSlugs1k/42_4_2_slugs_centralized	slugs_centralized	shields/general_shield	0.05
IndivQLearningSlugs1k/42_4_2	slugs_decentralized	shields/general_shield	True	-10	False	GridWorld	Pentagon	FullObsDiscrete	Individual_Q	1.0	0.05	1000	2	True	IndivQLearningSlugs1k/42_4_2_slugs_decentralized	slugs_decentralized	shields/general_shield	0.05
IndivQLearningSlugs1k/42_4_2	slugs_decentralized	shields/general_shield	True	-10	False	GridWorld	Pentagon	FullObsDiscrete	Individual_Q	1.0	0.05	1000	2	True	IndivQLearningSlugs1k/42_4_2_none	none		0.05
IndivQLearningSlugs1k/43_4_3	slugs_decentralized	shields/general_shield	True	-10	False	GridWorld	Pentagon	FullObsDiscrete	Individual_Q	1.0	0.05	1000	3	True	IndivQLearningSlugs1k/43_4_3_slugs_centralized	slugs_centralized	shields/general_shield	0.05
IndivQLearningSlugs1k/43_4_3	slugs_decentralized	shields/general_shield	True	-10	False	GridWorld	Pentagon	FullObsDiscrete	Individual_Q	1.0	0.05	1000	3	True	IndivQLearningSlugs1k/43_4_3_slugs_decentralized	slugs_decentralized	shields/general_shield	0.05
IndivQLearningSlugs1k/43_4_3	slugs_decentralized	shields/general_shield	True	-10	False	GridWorld	Pentagon	FullObsDiscrete	Individual_Q	1.0	0.05	1000	3	True	IndivQLearningSlugs1k/43_4_3_none	none		0.05
IndivQLearningSlugs1k/44_4_4	slugs_decentralized	shields/general_shield	True	-10	False	GridWorld	Pentagon	FullObsDiscrete	Individual_Q	1.0	0.05	1000	4	True	IndivQLearningSlugs1k/44_4_4_slugs_centralized	slugs_centralized	shields/general_shield	0.05
IndivQLearningSlugs1k/44_4_4	slugs_decentralized	shields/general_shield	True	-10	False	GridWorld	Pentagon	FullObsDiscrete	Individual_Q	1.0	0.05	1000	4	True	IndivQLearningSlugs1k/44_4_4_slugs_decentralized	slugs_decentralized	shields/general_shield	0.05
IndivQLearningSlugs1k/44_4_4	slugs_decentralized	shields/general_shield	True	-10	False	GridWorld	Pentagon	FullObsDiscrete	Individual_Q	1.0	0.05	1000	4	True	IndivQLearningSlugs1k/44_4_4_none	none		0.05
IndivQLearningSlugs1k/45_4_5	slugs_decentralized	shields/general_shield	True	-10	False	GridWorld	Pentagon	FullObsDiscrete	Individual_Q	1.0	0.05	1000	5	True	IndivQLearningSlugs1k/45_4_5_slugs_centralized	slugs_centralized	shields/general_shield	0.05
IndivQLearningSlugs1k/45_4_5	slugs_decentralized	shields/general_shield	True	-10	False	GridWorld	Pentagon	FullObsDiscrete	Individual_Q	1.0	0.05	1000	5	True	IndivQLearningSlugs1k/45_4_5_slugs_decentralized	slugs_decentralized	shields/general_shield	0.05
IndivQLearningSlugs1k/45_4_5	slugs_decentralized	shields/general_shield	True	-10	False	GridWorld	Pentagon	FullObsDiscrete	Individual_Q	1.0	0.05	1000	5	True	IndivQLearningSlugs1k/45_4_5_none	none		0.05
IndivQLearningSlugs1k/46_4_6	slugs_decentralized	shields/general_shield	True	-10	False	GridWorld	Pentagon	FullObsDiscrete	Individual_Q	1.0	0.05	1000	6	True	IndivQLearningSlugs1k/46_4_6_slugs_centralized	slugs_centralized	shields/general_shield	0.05
IndivQLearningSlugs1k/46_4_6	slugs_decentralized	shields/general_shield	True	-10	False	GridWorld	Pentagon	FullObsDiscrete	Individual_Q	1.0	0.05	1000	6	True	IndivQLearningSlugs1k/46_4_6_slugs_decentralized	slugs_decentralized	shields/general_shield	0.05
IndivQLearningSlugs1k/46_4_6	slugs_decentralized	shields/general_shield	True	-10	False	GridWorld	Pentagon	FullObsDiscrete	Individual_Q	1.0	0.05	1000	6	True	IndivQLearningSlugs1k/46_4_6_none	none		0.05
IndivQLearningSlugs1k/47_4_7	slugs_decentralized	shields/general_shield	True	-10	False	GridWorld	Pentagon	FullObsDiscrete	Individual_Q	1.0	0.05	1000	7	True	IndivQLearningSlugs1k/47_4_7_slugs_centralized	slugs_centralized	shields/general_shield	0.05
IndivQLearningSlugs1k/47_4_7	slugs_decentralized	shields/general_shield	True	-10	False	GridWorld	Pentagon	FullObsDiscrete	Individual_Q	1.0	0.05	1000	7	True	IndivQLearningSlugs1k/47_4_7_slugs_decentralized	slugs_decentralized	shields/general_shield	0.05
IndivQLearningSlugs1k/47_4_7	slugs_decentralized	shields/general_shield	True	-10	False	GridWorld	Pentagon	FullObsDiscrete	Individual_Q	1.0	0.05	1000	7	True	IndivQLearningSlugs1k/47_4_7_none	none		0.05
IndivQLearningSlugs1k/48_4_8	slugs_decentralized	shields/general_shield	True	-10	False	GridWorld	Pentagon	FullObsDiscrete	Individual_Q	1.0	0.05	1000	8	True	IndivQLearningSlugs1k/48_4_8_slugs_centralized	slugs_centralized	shields/general_shield	0.05
IndivQLearningSlugs1k/48_4_8	slugs_decentralized	shields/general_shield	True	-10	False	GridWorld	Pentagon	FullObsDiscrete	Individual_Q	1.0	0.05	1000	8	True	IndivQLearningSlugs1k/48_4_8_slugs_decentralized	slugs_decentralized	shields/general_shield	0.05
IndivQLearningSlugs1k/48_4_8	slugs_decentralized	shields/general_shield	True	-10	False	GridWorld	Pentagon	FullObsDiscrete	Individual_Q	1.0	0.05	1000	8	True	IndivQLearningSlugs1k/48_4_8_none	none		0.05
IndivQLearningSlugs1k/49_4_9	slugs_decentralized	shields/general_shield	True	-10	False	GridWorld	Pentagon	FullObsDiscrete	Individual_Q	1.0	0.05	1000	9	True	IndivQLearningSlugs1k/49_4_9_slugs_centralized	slugs_centralized	shields/general_shield	0.05
IndivQLearningSlugs1k/49_4_9	slugs_decentralized	shields/general_shield	True	-10	False	GridWorld	Pentagon	FullObsDiscrete	Individual_Q	1.0	0.05	1000	9	True	IndivQLearningSlugs1k/49_4_9_slugs_decentralized	slugs_decentralized	shields/general_shield	0.05
IndivQLearningSlugs1k/49_4_9	slugs_decentralized	shields/general_shield	True	-10	False	GridWorld	Pentagon	FullObsDiscrete	Individual_Q	1.0	0.05	1000	9	True	IndivQLearningSlugs1k/49_4_9_none	none		0.05
IndivQLearningSlugs1k/50_5_0	none		True	-10	False	GridWorld	Pentagon	FullObsDiscrete	Individual_Q	1.0	0.05	1000	0	True	IndivQLearningSlugs1k/50_5_0_slugs_centralized	slugs_centralized	shields/general_shield	0.05
IndivQLearningSlugs1k/50_5_0	none		True	-10	False	GridWorld	Pentagon	FullObsDiscrete	Individual_Q	1.0	0.05	1000	0	True	IndivQLearningSlugs1k/50_5_0_slugs_decentralized	slugs_decentralized	shields/general_shield	0.05
IndivQLearningSlugs1k/50_5_0	none		True	-10	False	GridWorld	Pentagon	FullObsDiscrete	Individual_Q	1.0	0.05	1000	0	True	IndivQLearningSlugs1k/50_5_0_none	none		0.05
IndivQLearningSlugs1k/51_5_1	none		True	-10	False	GridWorld	Pentagon	FullObsDiscrete	Individual_Q	1.0	0.05	1000	1	True	IndivQLearningSlugs1k/51_5_1_slugs_centralized	slugs_centralized	shields/general_shield	0.05
IndivQLearningSlugs1k/51_5_1	none		True	-10	False	GridWorld	Pentagon	FullObsDiscrete	Individual_Q	1.0	0.05	1000	1	True	IndivQLearningSlugs1k/51_5_1_slugs_decentralized	slugs_decentralized	shields/general_shield	0.05
IndivQLearningSlugs1k/51_5_1	none		True	-10	False	GridWorld	Pentagon	FullObsDiscrete	Individual_Q	1.0	0.05	1000	1	True	IndivQLearningSlugs1k/51_5_1_none	none		0.05
IndivQLearningSlugs1k/52_5_2	none		True	-10	False	GridWorld	Pentagon	FullObsDiscrete	Individual_Q	1.0	0.05	1000	2	True	IndivQLearningSlugs1k/52_5_2_slugs_centralized	slugs_centralized	shields/general_shield	0.05
IndivQLearningSlugs1k/52_5_2	none		True	-10	False	GridWorld	Pentagon	FullObsDiscrete	Individual_Q	1.0	0.05	1000	2	True	IndivQLearningSlugs1k/52_5_2_slugs_decentralized	slugs_decentralized	shields/general_shield	0.05
IndivQLearningSlugs1k/52_5_2	none		True	-10	False	GridWorld	Pentagon	FullObsDiscrete	Individual_Q	1.0	0.05	1000	2	True	IndivQLearningSlugs1k/52_5_2_none	none		0.05
IndivQLearningSlugs1k/53_5_3	none		True	-10	False	GridWorld	Pentagon	FullObsDiscrete	Individual_Q	1.0	0.05	1000	3	True	IndivQLearningSlugs1k/53_5_3_slugs_centralized	slugs_centralized	shields/general_shield	0.05
IndivQLearningSlugs1k/53_5_3	none		True	-10	False	GridWorld	Pentagon	FullObsDiscrete	Individual_Q	1.0	0.05	1000	3	True	IndivQLearningSlugs1k/53_5_3_slugs_decentralized	slugs_decentralized	shields/general_shield	0.05
IndivQLearningSlugs1k/53_5_3	none		True	-10	False	GridWorld	Pentagon	FullObsDiscrete	Individual_Q	1.0	0.05	1000	3	True	IndivQLearningSlugs1k/53_5_3_none	none		0.05
IndivQLearningSlugs1k/54_5_4	none		True	-10	False	GridWorld	Pentagon	FullObsDiscrete	Individual_Q	1.0	0.05	1000	4	True	IndivQLearningSlugs1k/54_5_4_slugs_centralized	slugs_centralized	shields/general_shield	0.05
IndivQLearningSlugs1k/54_5_4	none		True	-10	False	GridWorld	Pentagon	FullObsDiscrete	Individual_Q	1.0	0.05	1000	4	True	IndivQLearningSlugs1k/54_5_4_slugs_decentralized	slugs_decentralized	shields/general_shield	0.05
IndivQLearningSlugs1k/54_5_4	none		True	-10	False	GridWorld	Pentagon	FullObsDiscrete	Individual_Q	1.0	0.05	1000	4	True	IndivQLearningSlugs1k/54_5_4_none	none		0.05
IndivQLearningSlugs1k/55_5_5	none		True	-10	False	GridWorld	Pentagon	FullObsDiscrete	Individual_Q	1.0	0.05	1000	5	True	IndivQLearningSlugs1k/55_5_5_slugs_centralized	slugs_centralized	shields/general_shield	0.05
IndivQLearningSlugs1k/55_5_5	none		True	-10	False	GridWorld	Pentagon	FullObsDiscrete	Individual_Q	1.0	0.05	1000	5	True	IndivQLearningSlugs1k/55_5_5_slugs_decentralized	slugs_decentralized	shields/general_shield	0.05
IndivQLearningSlugs1k/55_5_5	none		True	-10	False	GridWorld	Pentagon	FullObsDiscrete	Individual_Q	1.0	0.05	1000	5	True	IndivQLearningSlugs1k/55_5_5_none	none		0.05
IndivQLearningSlugs1k/56_5_6	none		True	-10	False	GridWorld	Pentagon	FullObsDiscrete	Individual_Q	1.0	0.05	1000	6	True	IndivQLearningSlugs1k/56_5_6_slugs_centralized	slugs_centralized	shields/general_shield	0.05
IndivQLearningSlugs1k/56_5_6	none		True	-10	False	GridWorld	Pentagon	FullObsDiscrete	Individual_Q	1.0	0.05	1000	6	True	IndivQLearningSlugs1k/56_5_6_slugs_decentralized	slugs_decentralized	shields/general_shield	0.05
IndivQLearningSlugs1k/56_5_6	none		True	-10	False	GridWorld	Pentagon	FullObsDiscrete	Individual_Q	1.0	0.05	1000	6	True	IndivQLearningSlugs1k/56_5_6_none	none		0.05
IndivQLearningSlugs1k/57_5_7	none		True	-10	False	GridWorld	Pentagon	FullObsDiscrete	Individual_Q	1.0	0.05	1000	7	True	IndivQLearningSlugs1k/57_5_7_slugs_centralized	slugs_centralized	shields/general_shield	0.05
IndivQLearningSlugs1k/57_5_7	none		True	-10	False	GridWorld	Pentagon	FullObsDiscrete	Individual_Q	1.0	0.05	1000	7	True	IndivQLearningSlugs1k/57_5_7_slugs_decentralized	slugs_decentralized	shields/general_shield	0.05
IndivQLearningSlugs1k/57_5_7	none		True	-10	False	GridWorld	Pentagon	FullObsDiscrete	Individual_Q	1.0	0.05	1000	7	True	IndivQLearningSlugs1k/57_5_7_none	none		0.05
IndivQLearningSlugs1k/58_5_8	none		True	-10	False	GridWorld	Pentagon	FullObsDiscrete	Individual_Q	1.0	0.05	1000	8	True	IndivQLearningSlugs1k/58_5_8_slugs_centralized	slugs_centralized	shields/general_shield	0.05
IndivQLearningSlugs1k/58_5_8	none		True	-10	False	GridWorld	Pentagon	FullObsDiscrete	Individual_Q	1.0	0.05	1000	8	True	IndivQLearningSlugs1k/58_5_8_slugs_decentralized	slugs_decentralized	shields/general_shield	0.05
IndivQLearningSlugs1k/58_5_8	none		True	-10	False	GridWorld	Pentagon	FullObsDiscrete	Individual_Q	1.0	0.05	1000	8	True	IndivQLearningSlugs1k/58_5_8_none	none		0.05
IndivQLearningSlugs1k/59_5_9	none		True	-10	False	GridWorld	Pentagon	FullObsDiscrete	Individual_Q	1.0	0.05	1000	9	True	IndivQLearningSlugs1k/59_5_9_slugs_centralized	slugs_centralized	shields/general_shield	0.05
IndivQLearningSlugs1k/59_5_9	none		True	-10	False	GridWorld	Pentagon	FullObsDiscrete	Individual_Q	1.0	0.05	1000	9	True	IndivQLearningSlugs1k/59_5_9_slugs_decentralized	slugs_decentralized	shields/general_shield	0.05
IndivQLearningSlugs1k/59_5_9	none		True	-10	False	GridWorld	Pentagon	FullObsDiscrete	Individual_Q	1.0	0.05	1000	9	True	IndivQLearningSlugs1k/59_5_9_none	none		0.05
IndivQLearningSlugs1k/60_6_0	slugs_centralized	shields/general_shield	True	-10	True	GridWorld	ISR	FullObsDiscrete	Individual_Q	1.0	0.05	1000	0	True	IndivQLearningSlugs1k/60_6_0_slugs_centralized	slugs_centralized	shields/general_shield	0.05
IndivQLearningSlugs1k/60_6_0	slugs_centralized	shields/general_shield	True	-10	True	GridWorld	ISR	FullObsDiscrete	Individual_Q	1.0	0.05	1000	0	True	IndivQLearningSlugs1k/60_6_0_slugs_decentralized	slugs_decentralized	shields/general_shield	0.05
IndivQLearningSlugs1k/60_6_0	slugs_centralized	shields/general_shield	True	-10	True	GridWorld	ISR	FullObsDiscrete	Individual_Q	1.0	0.05	1000	0	True	IndivQLearningSlugs1k/60_6_0_none	none		0.05
IndivQLearningSlugs1k/61_6_1	slugs_centralized	shields/general_shield	True	-10	True	GridWorld	ISR	FullObsDiscrete	Individual_Q	1.0	0.05	1000	1	True	IndivQLearningSlugs1k/61_6_1_slugs_centralized	slugs_centralized	shields/general_shield	0.05
IndivQLearningSlugs1k/61_6_1	slugs_centralized	shields/general_shield	True	-10	True	GridWorld	ISR	FullObsDiscrete	Individual_Q	1.0	0.05	1000	1	True	IndivQLearningSlugs1k/61_6_1_slugs_decentralized	slugs_decentralized	shields/general_shield	0.05
IndivQLearningSlugs1k/61_6_1	slugs_centralized	shields/general_shield	True	-10	True	GridWorld	ISR	FullObsDiscrete	Individual_Q	1.0	0.05	1000	1	True	IndivQLearningSlugs1k/61_6_1_none	none		0.05
IndivQLearningSlugs1k/62_6_2	slugs_centralized	shields/general_shield	True	-10	True	GridWorld	ISR	FullObsDiscrete	Individual_Q	1.0	0.05	1000	2	True	IndivQLearningSlugs1k/62_6_2_slugs_centralized	slugs_centralized	shields/general_shield	0.05
IndivQLearningSlugs1k/62_6_2	slugs_centralized	shields/general_shield	True	-10	True	GridWorld	ISR	FullObsDiscrete	Individual_Q	1.0	0.05	1000	2	True	IndivQLearningSlugs1k/62_6_2_slugs_decentralized	slugs_decentralized	shields/general_shield	0.05
IndivQLearningSlugs1k/62_6_2	slugs_centralized	shields/general_shield	True	-10	True	GridWorld	ISR	FullObsDiscrete	Individual_Q	1.0	0.05	1000	2	True	IndivQLearningSlugs1k/62_6_2_none	none		0.05
IndivQLearningSlugs1k/63_6_3	slugs_centralized	shields/general_shield	True	-10	True	GridWorld	ISR	FullObsDiscrete	Individual_Q	1.0	0.05	1000	3	True	IndivQLearningSlugs1k/63_6_3_slugs_centralized	slugs_centralized	shields/general_shield	0.05
IndivQLearningSlugs1k/63_6_3	slugs_centralized	shields/general_shield	True	-10	True	GridWorld	ISR	FullObsDiscrete	Individual_Q	1.0	0.05	1000	3	True	IndivQLearningSlugs1k/63_6_3_slugs_decentralized	slugs_decentralized	shields/general_shield	0.05
IndivQLearningSlugs1k/63_6_3	slugs_centralized	shields/general_shield	True	-10	True	GridWorld	ISR	FullObsDiscrete	Individual_Q	1.0	0.05	1000	3	True	IndivQLearningSlugs1k/63_6_3_none	none		0.05
IndivQLearningSlugs1k/64_6_4	slugs_centralized	shields/general_shield	True	-10	True	GridWorld	ISR	FullObsDiscrete	Individual_Q	1.0	0.05	1000	4	True	IndivQLearningSlugs1k/64_6_4_slugs_centralized	slugs_centralized	shields/general_shield	0.05
IndivQLearningSlugs1k/64_6_4	slugs_centralized	shields/general_shield	True	-10	True	GridWorld	ISR	FullObsDiscrete	Individual_Q	1.0	0.05	1000	4	True	IndivQLearningSlugs1k/64_6_4_slugs_decentralized	slugs_decentralized	shields/general_shield	0.05
IndivQLearningSlugs1k/64_6_4	slugs_centralized	shields/general_shield	True	-10	True	GridWorld	ISR	FullObsDiscrete	Individual_Q	1.0	0.05	1000	4	True	IndivQLearningSlugs1k/64_6_4_none	none		0.05
IndivQLearningSlugs1k/65_6_5	slugs_centralized	shields/general_shield	True	-10	True	GridWorld	ISR	FullObsDiscrete	Individual_Q	1.0	0.05	1000	5	True	IndivQLearningSlugs1k/65_6_5_slugs_centralized	slugs_centralized	shields/general_shield	0.05
IndivQLearningSlugs1k/65_6_5	slugs_centralized	shields/general_shield	True	-10	True	GridWorld	ISR	FullObsDiscrete	Individual_Q	1.0	0.05	1000	5	True	IndivQLearningSlugs1k/65_6_5_slugs_decentralized	slugs_decentralized	shields/general_shield	0.05
IndivQLearningSlugs1k/65_6_5	slugs_centralized	shields/general_shield	True	-10	True	GridWorld	ISR	FullObsDiscrete	Individual_Q	1.0	0.05	1000	5	True	IndivQLearningSlugs1k/65_6_5_none	none		0.05
IndivQLearningSlugs1k/66_6_6	slugs_centralized	shields/general_shield	True	-10	True	GridWorld	ISR	FullObsDiscrete	Individual_Q	1.0	0.05	1000	6	True	IndivQLearningSlugs1k/66_6_6_slugs_centralized	slugs_centralized	shields/general_shield	0.05
IndivQLearningSlugs1k/66_6_6	slugs_centralized	shields/general_shield	True	-10	True	GridWorld	ISR	FullObsDiscrete	Individual_Q	1.0	0.05	1000	6	True	IndivQLearningSlugs1k/66_6_6_slugs_decentralized	slugs_decentralized	shields/general_shield	0.05
IndivQLearningSlugs1k/66_6_6	slugs_centralized	shields/general_shield	True	-10	True	GridWorld	ISR	FullObsDiscrete	Individual_Q	1.0	0.05	1000	6	True	IndivQLearningSlugs1k/66_6_6_none	none		0.05
IndivQLearningSlugs1k/67_6_7	slugs_centralized	shields/general_shield	True	-10	True	GridWorld	ISR	FullObsDiscrete	Individual_Q	1.0	0.05	1000	7	True	IndivQLearningSlugs1k/67_6_7_slugs_centralized	slugs_centralized	shields/general_shield	0.05
IndivQLearningSlugs1k/67_6_7	slugs_centralized	shields/general_shield	True	-10	True	GridWorld	ISR	FullObsDiscrete	Individual_Q	1.0	0.05	1000	7	True	IndivQLearningSlugs1k/67_6_7_slugs_decentralized	slugs_decentralized	shields/general_shield	0.05
IndivQLearningSlugs1k/67_6_7	slugs_centralized	shields/general_shield	True	-10	True	GridWorld	ISR	FullObsDiscrete	Individual_Q	1.0	0.05	1000	7	True	IndivQLearningSlugs1k/67_6_7_none	none		0.05
IndivQLearningSlugs1k/68_6_8	slugs_centralized	shields/general_shield	True	-10	True	GridWorld	ISR	FullObsDiscrete	Individual_Q	1.0	0.05	1000	8	True	IndivQLearningSlugs1k/68_6_8_slugs_centralized	slugs_centralized	shields/general_shield	0.05
IndivQLearningSlugs1k/68_6_8	slugs_centralized	shields/general_shield	True	-10	True	GridWorld	ISR	FullObsDiscrete	Individual_Q	1.0	0.05	1000	8	True	IndivQLearningSlugs1k/68_6_8_slugs_decentralized	slugs_decentralized	shields/general_shield	0.05
IndivQLearningSlugs1k/68_6_8	slugs_centralized	shields/general_shield	True	-10	True	GridWorld	ISR	FullObsDiscrete	Individual_Q	1.0	0.05	1000	8	True	IndivQLearningSlugs1k/68_6_8_none	none		0.05
IndivQLearningSlugs1k/69_6_9	slugs_centralized	shields/general_shield	True	-10	True	GridWorld	ISR	FullObsDiscrete	Individual_Q	1.0	0.05	1000	9	True	IndivQLearningSlugs1k/69_6_9_slugs_centralized	slugs_centralized	shields/general_shield	0.05
IndivQLearningSlugs1k/69_6_9	slugs_centralized	shields/general_shield	True	-10	True	GridWorld	ISR	FullObsDiscrete	Individual_Q	1.0	0.05	1000	9	True	IndivQLearningSlugs1k/69_6_9_slugs_decentralized	slugs_decentralized	shields/general_shield	0.05
IndivQLearningSlugs1k/69_6_9	slugs_centralized	shields/general_shield	True	-10	True	GridWorld	ISR	FullObsDiscrete	Individual_Q	1.0	0.05	1000	9	True	IndivQLearningSlugs1k/69_6_9_none	none		0.05
IndivQLearningSlugs1k/70_7_0	slugs_decentralized	shields/general_shield	True	-10	True	GridWorld	ISR	FullObsDiscrete	Individual_Q	1.0	0.05	1000	0	True	IndivQLearningSlugs1k/70_7_0_slugs_centralized	slugs_centralized	shields/general_shield	0.05
IndivQLearningSlugs1k/70_7_0	slugs_decentralized	shields/general_shield	True	-10	True	GridWorld	ISR	FullObsDiscrete	Individual_Q	1.0	0.05	1000	0	True	IndivQLearningSlugs1k/70_7_0_slugs_decentralized	slugs_decentralized	shields/general_shield	0.05
IndivQLearningSlugs1k/70_7_0	slugs_decentralized	shields/general_shield	True	-10	True	GridWorld	ISR	FullObsDiscrete	Individual_Q	1.0	0.05	1000	0	True	IndivQLearningSlugs1k/70_7_0_none	none		0.05
IndivQLearningSlugs1k/71_7_1	slugs_decentralized	shields/general_shield	True	-10	True	GridWorld	ISR	FullObsDiscrete	Individual_Q	1.0	0.05	1000	1	True	IndivQLearningSlugs1k/71_7_1_slugs_centralized	slugs_centralized	shields/general_shield	0.05
IndivQLearningSlugs1k/71_7_1	slugs_decentralized	shields/general_shield	True	-10	True	GridWorld	ISR	FullObsDiscrete	Individual_Q	1.0	0.05	1000	1	True	IndivQLearningSlugs1k/71_7_1_slugs_decentralized	slugs_decentralized	shields/general_shield	0.05
IndivQLearningSlugs1k/71_7_1	slugs_decentralized	shields/general_shield	True	-10	True	GridWorld	ISR	FullObsDiscrete	Individual_Q	1.0	0.05	1000	1	True	IndivQLearningSlugs1k/71_7_1_none	none		0.05
IndivQLearningSlugs1k/72_7_2	slugs_decentralized	shields/general_shield	True	-10	True	GridWorld	ISR	FullObsDiscrete	Individual_Q	1.0	0.05	1000	2	True	IndivQLearningSlugs1k/72_7_2_slugs_centralized	slugs_centralized	shields/general_shield	0.05
IndivQLearningSlugs1k/72_7_2	slugs_decentralized	shields/general_shield	True	-10	True	GridWorld	ISR	FullObsDiscrete	Individual_Q	1.0	0.05	1000	2	True	IndivQLearningSlugs1k/72_7_2_slugs_decentralized	slugs_decentralized	shields/general_shield	0.05
IndivQLearningSlugs1k/72_7_2	slugs_decentralized	shields/general_shield	True	-10	True	GridWorld	ISR	FullObsDiscrete	Individual_Q	1.0	0.05	1000	2	True	IndivQLearningSlugs1k/72_7_2_none	none		0.05
IndivQLearningSlugs1k/73_7_3	slugs_decentralized	shields/general_shield	True	-10	True	GridWorld	ISR	FullObsDiscrete	Individual_Q	1.0	0.05	1000	3	True	IndivQLearningSlugs1k/73_7_3_slugs_centralized	slugs_centralized	shields/general_shield	0.05
IndivQLearningSlugs1k/73_7_3	slugs_decentralized	shields/general_shield	True	-10	True	GridWorld	ISR	FullObsDiscrete	Individual_Q	1.0	0.05	1000	3	True	IndivQLearningSlugs1k/73_7_3_slugs_decentralized	slugs_decentralized	shields/general_shield	0.05
IndivQLearningSlugs1k/73_7_3	slugs_decentralized	shields/general_shield	True	-10	True	GridWorld	ISR	FullObsDiscrete	Individual_Q	1.0	0.05	1000	3	True	IndivQLearningSlugs1k/73_7_3_none	none		0.05
IndivQLearningSlugs1k/74_7_4	slugs_decentralized	shields/general_shield	True	-10	True	GridWorld	ISR	FullObsDiscrete	Individual_Q	1.0	0.05	1000	4	True	IndivQLearningSlugs1k/74_7_4_slugs_centralized	slugs_centralized	shields/general_shield	0.05
IndivQLearningSlugs1k/74_7_4	slugs_decentralized	shields/general_shield	True	-10	True	GridWorld	ISR	FullObsDiscrete	Individual_Q	1.0	0.05	1000	4	True	IndivQLearningSlugs1k/74_7_4_slugs_decentralized	slugs_decentralized	shields/general_shield	0.05
IndivQLearningSlugs1k/74_7_4	slugs_decentralized	shields/general_shield	True	-10	True	GridWorld	ISR	FullObsDiscrete	Individual_Q	1.0	0.05	1000	4	True	IndivQLearningSlugs1k/74_7_4_none	none		0.05
IndivQLearningSlugs1k/75_7_5	slugs_decentralized	shields/general_shield	True	-10	True	GridWorld	ISR	FullObsDiscrete	Individual_Q	1.0	0.05	1000	5	True	IndivQLearningSlugs1k/75_7_5_slugs_centralized	slugs_centralized	shields/general_shield	0.05
IndivQLearningSlugs1k/75_7_5	slugs_decentralized	shields/general_shield	True	-10	True	GridWorld	ISR	FullObsDiscrete	Individual_Q	1.0	0.05	1000	5	True	IndivQLearningSlugs1k/75_7_5_slugs_decentralized	slugs_decentralized	shields/general_shield	0.05
IndivQLearningSlugs1k/75_7_5	slugs_decentralized	shields/general_shield	True	-10	True	GridWorld	ISR	FullObsDiscrete	Individual_Q	1.0	0.05	1000	5	True	IndivQLearningSlugs1k/75_7_5_none	none		0.05
IndivQLearningSlugs1k/76_7_6	slugs_decentralized	shields/general_shield	True	-10	True	GridWorld	ISR	FullObsDiscrete	Individual_Q	1.0	0.05	1000	6	True	IndivQLearningSlugs1k/76_7_6_slugs_centralized	slugs_centralized	shields/general_shield	0.05
IndivQLearningSlugs1k/76_7_6	slugs_decentralized	shields/general_shield	True	-10	True	GridWorld	ISR	FullObsDiscrete	Individual_Q	1.0	0.05	1000	6	True	IndivQLearningSlugs1k/76_7_6_slugs_decentralized	slugs_decentralized	shields/general_shield	0.05
IndivQLearningSlugs1k/76_7_6	slugs_decentralized	shields/general_shield	True	-10	True	GridWorld	ISR	FullObsDiscrete	Individual_Q	1.0	0.05	1000	6	True	IndivQLearningSlugs1k/76_7_6_none	none		0.05
IndivQLearningSlugs1k/77_7_7	slugs_decentralized	shields/general_shield	True	-10	True	GridWorld	ISR	FullObsDiscrete	Individual_Q	1.0	0.05	1000	7	True	IndivQLearningSlugs1k/77_7_7_slugs_centralized	slugs_centralized	shields/general_shield	0.05
IndivQLearningSlugs1k/77_7_7	slugs_decentralized	shields/general_shield	True	-10	True	GridWorld	ISR	FullObsDiscrete	Individual_Q	1.0	0.05	1000	7	True	IndivQLearningSlugs1k/77_7_7_slugs_decentralized	slugs_decentralized	shields/general_shield	0.05
IndivQLearningSlugs1k/77_7_7	slugs_decentralized	shields/general_shield	True	-10	True	GridWorld	ISR	FullObsDiscrete	Individual_Q	1.0	0.05	1000	7	True	IndivQLearningSlugs1k/77_7_7_none	none		0.05
IndivQLearningSlugs1k/78_7_8	slugs_decentralized	shields/general_shield	True	-10	True	GridWorld	ISR	FullObsDiscrete	Individual_Q	1.0	0.05	1000	8	True	IndivQLearningSlugs1k/78_7_8_slugs_centralized	slugs_centralized	shields/general_shield	0.05
IndivQLearningSlugs1k/78_7_8	slugs_decentralized	shields/general_shield	True	-10	True	GridWorld	ISR	FullObsDiscrete	Individual_Q	1.0	0.05	1000	8	True	IndivQLearningSlugs1k/78_7_8_slugs_decentralized	slugs_decentralized	shields/general_shield	0.05
IndivQLearningSlugs1k/78_7_8	slugs_decentralized	shields/general_shield	True	-10	True	GridWorld	ISR	FullObsDiscrete	Individual_Q	1.0	0.05	1000	8	True	IndivQLearningSlugs1k/78_7_8_none	none		0.05
IndivQLearningSlugs1k/79_7_9	slugs_decentralized	shields/general_shield	True	-10	True	GridWorld	ISR	FullObsDiscrete	Individual_Q	1.0	0.05	1000	9	True	IndivQLearningSlugs1k/79_7_9_slugs_centralized	slugs_centralized	shields/general_shield	0.05
IndivQLearningSlugs1k/79_7_9	slugs_decentralized	shields/general_shield	True	-10	True	GridWorld	ISR	FullObsDiscrete	Individual_Q	1.0	0.05	1000	9	True	IndivQLearningSlugs1k/79_7_9_slugs_decentralized	slugs_decentralized	shields/general_shield	0.05
IndivQLearningSlugs1k/79_7_9	slugs_decentralized	shields/general_shield	True	-10	True	GridWorld	ISR	FullObsDiscrete	Individual_Q	1.0	0.05	1000	9	True	IndivQLearningSlugs1k/79_7_9_none	none		0.05
IndivQLearningSlugs1k/80_8_0	none		True	-10	True	GridWorld	ISR	FullObsDiscrete	Individual_Q	1.0	0.05	1000	0	True	IndivQLearningSlugs1k/80_8_0_slugs_centralized	slugs_centralized	shields/general_shield	0.05
IndivQLearningSlugs1k/80_8_0	none		True	-10	True	GridWorld	ISR	FullObsDiscrete	Individual_Q	1.0	0.05	1000	0	True	IndivQLearningSlugs1k/80_8_0_slugs_decentralized	slugs_decentralized	shields/general_shield	0.05
IndivQLearningSlugs1k/80_8_0	none		True	-10	True	GridWorld	ISR	FullObsDiscrete	Individual_Q	1.0	0.05	1000	0	True	IndivQLearningSlugs1k/80_8_0_none	none		0.05
IndivQLearningSlugs1k/81_8_1	none		True	-10	True	GridWorld	ISR	FullObsDiscrete	Individual_Q	1.0	0.05	1000	1	True	IndivQLearningSlugs1k/81_8_1_slugs_centralized	slugs_centralized	shields/general_shield	0.05
IndivQLearningSlugs1k/81_8_1	none		True	-10	True	GridWorld	ISR	FullObsDiscrete	Individual_Q	1.0	0.05	1000	1	True	IndivQLearningSlugs1k/81_8_1_slugs_decentralized	slugs_decentralized	shields/general_shield	0.05
IndivQLearningSlugs1k/81_8_1	none		True	-10	True	GridWorld	ISR	FullObsDiscrete	Individual_Q	1.0	0.05	1000	1	True	IndivQLearningSlugs1k/81_8_1_none	none		0.05
IndivQLearningSlugs1k/82_8_2	none		True	-10	True	GridWorld	ISR	FullObsDiscrete	Individual_Q	1.0	0.05	1000	2	True	IndivQLearningSlugs1k/82_8_2_slugs_centralized	slugs_centralized	shields/general_shield	0.05
IndivQLearningSlugs1k/82_8_2	none		True	-10	True	GridWorld	ISR	FullObsDiscrete	Individual_Q	1.0	0.05	1000	2	True	IndivQLearningSlugs1k/82_8_2_slugs_decentralized	slugs_decentralized	shields/general_shield	0.05
IndivQLearningSlugs1k/82_8_2	none		True	-10	True	GridWorld	ISR	FullObsDiscrete	Individual_Q	1.0	0.05	1000	2	True	IndivQLearningSlugs1k/82_8_2_none	none		0.05
IndivQLearningSlugs1k/83_8_3	none		True	-10	True	GridWorld	ISR	FullObsDiscrete	Individual_Q	1.0	0.05	1000	3	True	IndivQLearningSlugs1k/83_8_3_slugs_centralized	slugs_centralized	shields/general_shield	0.05
IndivQLearningSlugs1k/83_8_3	none		True	-10	True	GridWorld	ISR	FullObsDiscrete	Individual_Q	1.0	0.05	1000	3	True	IndivQLearningSlugs1k/83_8_3_slugs_decentralized	slugs_decentralized	shields/general_shield	0.05
IndivQLearningSlugs1k/83_8_3	none		True	-10	True	GridWorld	ISR	FullObsDiscrete	Individual_Q	1.0	0.05	1000	3	True	IndivQLearningSlugs1k/83_8_3_none	none		0.05
IndivQLearningSlugs1k/84_8_4	none		True	-10	True	GridWorld	ISR	FullObsDiscrete	Individual_Q	1.0	0.05	1000	4	True	IndivQLearningSlugs1k/84_8_4_slugs_centralized	slugs_centralized	shields/general_shield	0.05
IndivQLearningSlugs1k/84_8_4	none		True	-10	True	GridWorld	ISR	FullObsDiscrete	Individual_Q	1.0	0.05	1000	4	True	IndivQLearningSlugs1k/84_8_4_slugs_decentralized	slugs_decentralized	shields/general_shield	0.05
IndivQLearningSlugs1k/84_8_4	none		True	-10	True	GridWorld	ISR	FullObsDiscrete	Individual_Q	1.0	0.05	1000	4	True	IndivQLearningSlugs1k/84_8_4_none	none		0.05
IndivQLearningSlugs1k/85_8_5	none		True	-10	True	GridWorld	ISR	FullObsDiscrete	Individual_Q	1.0	0.05	1000	5	True	IndivQLearningSlugs1k/85_8_5_slugs_centralized	slugs_centralized	shields/general_shield	0.05
IndivQLearningSlugs1k/85_8_5	none		True	-10	True	GridWorld	ISR	FullObsDiscrete	Individual_Q	1.0	0.05	1000	5	True	IndivQLearningSlugs1k/85_8_5_slugs_decentralized	slugs_decentralized	shields/general_shield	0.05
IndivQLearningSlugs1k/85_8_5	none		True	-10	True	GridWorld	ISR	FullObsDiscrete	Individual_Q	1.0	0.05	1000	5	True	IndivQLearningSlugs1k/85_8_5_none	none		0.05
IndivQLearningSlugs1k/86_8_6	none		True	-10	True	GridWorld	ISR	FullObsDiscrete	Individual_Q	1.0	0.05	1000	6	True	IndivQLearningSlugs1k/86_8_6_slugs_centralized	slugs_centralized	shields/general_shield	0.05
IndivQLearningSlugs1k/86_8_6	none		True	-10	True	GridWorld	ISR	FullObsDiscrete	Individual_Q	1.0	0.05	1000	6	True	IndivQLearningSlugs1k/86_8_6_slugs_decentralized	slugs_decentralized	shields/general_shield	0.05
IndivQLearningSlugs1k/86_8_6	none		True	-10	True	GridWorld	ISR	FullObsDiscrete	Individual_Q	1.0	0.05	1000	6	True	IndivQLearningSlugs1k/86_8_6_none	none		0.05
IndivQLearningSlugs1k/87_8_7	none		True	-10	True	GridWorld	ISR	FullObsDiscrete	Individual_Q	1.0	0.05	1000	7	True	IndivQLearningSlugs1k/87_8_7_slugs_centralized	slugs_centralized	shields/general_shield	0.05
IndivQLearningSlugs1k/87_8_7	none		True	-10	True	GridWorld	ISR	FullObsDiscrete	Individual_Q	1.0	0.05	1000	7	True	IndivQLearningSlugs1k/87_8_7_slugs_decentralized	slugs_decentralized	shields/general_shield	0.05
IndivQLearningSlugs1k/87_8_7	none		True	-10	True	GridWorld	ISR	FullObsDiscrete	Individual_Q	1.0	0.05	1000	7	True	IndivQLearningSlugs1k/87_8_7_none	none		0.05
IndivQLearningSlugs1k/88_8_8	none		True	-10	True	GridWorld	ISR	FullObsDiscrete	Individual_Q	1.0	0.05	1000	8	True	IndivQLearningSlugs1k/88_8_8_slugs_centralized	slugs_centralized	shields/general_shield	0.05
IndivQLearningSlugs1k/88_8_8	none		True	-10	True	GridWorld	ISR	FullObsDiscrete	Individual_Q	1.0	0.05	1000	8	True	IndivQLearningSlugs1k/88_8_8_slugs_decentralized	slugs_decentralized	shields/general_shield	0.05
IndivQLearningSlugs1k/88_8_8	none		True	-10	True	GridWorld	ISR	FullObsDiscrete	Individual_Q	1.0	0.05	1000	8	True	IndivQLearningSlugs1k/88_8_8_none	none		0.05
IndivQLearningSlugs1k/89_8_9	none		True	-10	True	GridWorld	ISR	FullObsDiscrete	Individual_Q	1.0	0.05	1000	9	True	IndivQLearningSlugs1k/89_8_9_slugs_centralized	slugs_centralized	shields/general_shield	0.05
IndivQLearningSlugs1k/89_8_9	none		True	-10	True	GridWorld	ISR	FullObsDiscrete	Individual_Q	1.0	0.05	1000	9	True	IndivQLearningSlugs1k/89_8_9_slugs_decentralized	slugs_decentralized	shields/general_shield	0.05
IndivQLearningSlugs1k/89_8_9	none		True	-10	True	GridWorld	ISR	FullObsDiscrete	Individual_Q	1.0	0.05	1000	9	True	IndivQLearningSlugs1k/89_8_9_none	none		0.05
IndivQLearningSlugs1k/90_9_0	slugs_centralized	shields/general_shield	True	-10	False	GridWorld	ISR	FullObsDiscrete	Individual_Q	1.0	0.05	1000	0	True	IndivQLearningSlugs1k/90_9_0_slugs_centralized	slugs_centralized	shields/general_shield	0.05
IndivQLearningSlugs1k/90_9_0	slugs_centralized	shields/general_shield	True	-10	False	GridWorld	ISR	FullObsDiscrete	Individual_Q	1.0	0.05	1000	0	True	IndivQLearningSlugs1k/90_9_0_slugs_decentralized	slugs_decentralized	shields/general_shield	0.05
IndivQLearningSlugs1k/90_9_0	slugs_centralized	shields/general_shield	True	-10	False	GridWorld	ISR	FullObsDiscrete	Individual_Q	1.0	0.05	1000	0	True	IndivQLearningSlugs1k/90_9_0_none	none		0.05
IndivQLearningSlugs1k/91_9_1	slugs_centralized	shields/general_shield	True	-10	False	GridWorld	ISR	FullObsDiscrete	Individual_Q	1.0	0.05	1000	1	True	IndivQLearningSlugs1k/91_9_1_slugs_centralized	slugs_centralized	shields/general_shield	0.05
IndivQLearningSlugs1k/91_9_1	slugs_centralized	shields/general_shield	True	-10	False	GridWorld	ISR	FullObsDiscrete	Individual_Q	1.0	0.05	1000	1	True	IndivQLearningSlugs1k/91_9_1_slugs_decentralized	slugs_decentralized	shields/general_shield	0.05
IndivQLearningSlugs1k/91_9_1	slugs_centralized	shields/general_shield	True	-10	False	GridWorld	ISR	FullObsDiscrete	Individual_Q	1.0	0.05	1000	1	True	IndivQLearningSlugs1k/91_9_1_none	none		0.05
IndivQLearningSlugs1k/92_9_2	slugs_centralized	shields/general_shield	True	-10	False	GridWorld	ISR	FullObsDiscrete	Individual_Q	1.0	0.05	1000	2	True	IndivQLearningSlugs1k/92_9_2_slugs_centralized	slugs_centralized	shields/general_shield	0.05
IndivQLearningSlugs1k/92_9_2	slugs_centralized	shields/general_shield	True	-10	False	GridWorld	ISR	FullObsDiscrete	Individual_Q	1.0	0.05	1000	2	True	IndivQLearningSlugs1k/92_9_2_slugs_decentralized	slugs_decentralized	shields/general_shield	0.05
IndivQLearningSlugs1k/92_9_2	slugs_centralized	shields/general_shield	True	-10	False	GridWorld	ISR	FullObsDiscrete	Individual_Q	1.0	0.05	1000	2	True	IndivQLearningSlugs1k/92_9_2_none	none		0.05
IndivQLearningSlugs1k/93_9_3	slugs_centralized	shields/general_shield	True	-10	False	GridWorld	ISR	FullObsDiscrete	Individual_Q	1.0	0.05	1000	3	True	IndivQLearningSlugs1k/93_9_3_slugs_centralized	slugs_centralized	shields/general_shield	0.05
IndivQLearningSlugs1k/93_9_3	slugs_centralized	shields/general_shield	True	-10	False	GridWorld	ISR	FullObsDiscrete	Individual_Q	1.0	0.05	1000	3	True	IndivQLearningSlugs1k/93_9_3_slugs_decentralized	slugs_decentralized	shields/general_shield	0.05
IndivQLearningSlugs1k/93_9_3	slugs_centralized	shields/general_shield	True	-10	False	GridWorld	ISR	FullObsDiscrete	Individual_Q	1.0	0.05	1000	3	True	IndivQLearningSlugs1k/93_9_3_none	none		0.05
IndivQLearningSlugs1k/94_9_4	slugs_centralized	shields/general_shield	True	-10	False	GridWorld	ISR	FullObsDiscrete	Individual_Q	1.0	0.05	1000	4	True	IndivQLearningSlugs1k/94_9_4_slugs_centralized	slugs_centralized	shields/general_shield	0.05
IndivQLearningSlugs1k/94_9_4	slugs_centralized	shields/general_shield	True	-10	False	GridWorld	ISR	FullObsDiscrete	Individual_Q	1.0	0.05	1000	4	True	IndivQLearningSlugs1k/94_9_4_slugs_decentralized	slugs_decentralized	shields/general_shield	0.05
IndivQLearningSlugs1k/94_9_4	slugs_centralized	shields/general_shield	True	-10	False	GridWorld	ISR	FullObsDiscrete	Individual_Q	1.0	0.05	1000	4	True	IndivQLearningSlugs1k/94_9_4_none	none		0.05
IndivQLearningSlugs1k/95_9_5	slugs_centralized	shields/general_shield	True	-10	False	GridWorld	ISR	FullObsDiscrete	Individual_Q	1.0	0.05	1000	5	True	IndivQLearningSlugs1k/95_9_5_slugs_centralized	slugs_centralized	shields/general_shield	0.05
IndivQLearningSlugs1k/95_9_5	slugs_centralized	shields/general_shield	True	-10	False	GridWorld	ISR	FullObsDiscrete	Individual_Q	1.0	0.05	1000	5	True	IndivQLearningSlugs1k/95_9_5_slugs_decentralized	slugs_decentralized	shields/general_shield	0.05
IndivQLearningSlugs1k/95_9_5	slugs_centralized	shields/general_shield	True	-10	False	GridWorld	ISR	FullObsDiscrete	Individual_Q	1.0	0.05	1000	5	True	IndivQLearningSlugs1k/95_9_5_none	none		0.05
IndivQLearningSlugs1k/96_9_6	slugs_centralized	shields/general_shield	True	-10	False	GridWorld	ISR	FullObsDiscrete	Individual_Q	1.0	0.05	1000	6	True	IndivQLearningSlugs1k/96_9_6_slugs_centralized	slugs_centralized	shields/general_shield	0.05
IndivQLearningSlugs1k/96_9_6	slugs_centralized	shields/general_shield	True	-10	False	GridWorld	ISR	FullObsDiscrete	Individual_Q	1.0	0.05	1000	6	True	IndivQLearningSlugs1k/96_9_6_slugs_decentralized	slugs_decentralized	shields/general_shield	0.05
IndivQLearningSlugs1k/96_9_6	slugs_centralized	shields/general_shield	True	-10	False	GridWorld	ISR	FullObsDiscrete	Individual_Q	1.0	0.05	1000	6	True	IndivQLearningSlugs1k/96_9_6_none	none		0.05
IndivQLearningSlugs1k/97_9_7	slugs_centralized	shields/general_shield	True	-10	False	GridWorld	ISR	FullObsDiscrete	Individual_Q	1.0	0.05	1000	7	True	IndivQLearningSlugs1k/97_9_7_slugs_centralized	slugs_centralized	shields/general_shield	0.05
IndivQLearningSlugs1k/97_9_7	slugs_centralized	shields/general_shield	True	-10	False	GridWorld	ISR	FullObsDiscrete	Individual_Q	1.0	0.05	1000	7	True	IndivQLearningSlugs1k/97_9_7_slugs_decentralized	slugs_decentralized	shields/general_shield	0.05
IndivQLearningSlugs1k/97_9_7	slugs_centralized	shields/general_shield	True	-10	False	GridWorld	ISR	FullObsDiscrete	Individual_Q	1.0	0.05	1000	7	True	IndivQLearningSlugs1k/97_9_7_none	none		0.05
IndivQLearningSlugs1k/98_9_8	slugs_centralized	shields/general_shield	True	-10	False	GridWorld	ISR	FullObsDiscrete	Individual_Q	1.0	0.05	1000	8	True	IndivQLearningSlugs1k/98_9_8_slugs_centralized	slugs_centralized	shields/general_shield	0.05
IndivQLearningSlugs1k/98_9_8	slugs_centralized	shields/general_shield	True	-10	False	GridWorld	ISR	FullObsDiscrete	Individual_Q	1.0	0.05	1000	8	True	IndivQLearningSlugs1k/98_9_8_slugs_decentralized	slugs_decentralized	shields/general_shield	0.05
IndivQLearningSlugs1k/98_9_8	slugs_centralized	shields/general_shield	True	-10	False	GridWorld	ISR	FullObsDiscrete	Individual_Q	1.0	0.05	1000	8	True	IndivQLearningSlugs1k/98_9_8_none	none		0.05
IndivQLearningSlugs1k/99_9_9	slugs_centralized	shields/general_shield	True	-10	False	GridWorld	ISR	FullObsDiscrete	Individual_Q	1.0	0.05	1000	9	True	IndivQLearningSlugs1k/99_9_9_slugs_centralized	slugs_centralized	shields/general_shield	0.05
IndivQLearningSlugs1k/99_9_9	slugs_centralized	shields/general_shield	True	-10	False	GridWorld	ISR	FullObsDiscrete	Individual_Q	1.0	0.05	1000	9	True	IndivQLearningSlugs1k/99_9_9_slugs_decentralized	slugs_decentralized	shields/general_shield	0.05
IndivQLearningSlugs1k/99_9_9	slugs_centralized	shields/general_shield	True	-10	False	GridWorld	ISR	FullObsDiscrete	Individual_Q	1.0	0.05	1000	9	True	IndivQLearningSlugs1k/99_9_9_none	none		0.05
IndivQLearningSlugs1k/100_10_0	slugs_decentralized	shields/general_shield	True	-10	False	GridWorld	ISR	FullObsDiscrete	Individual_Q	1.0	0.05	1000	0	True	IndivQLearningSlugs1k/100_10_0_slugs_centralized	slugs_centralized	shields/general_shield	0.05
IndivQLearningSlugs1k/100_10_0	slugs_decentralized	shields/general_shield	True	-10	False	GridWorld	ISR	FullObsDiscrete	Individual_Q	1.0	0.05	1000	0	True	IndivQLearningSlugs1k/100_10_0_slugs_decentralized	slugs_decentralized	shields/general_shield	0.05
IndivQLearningSlugs1k/100_10_0	slugs_decentralized	shields/general_shield	True	-10	False	GridWorld	ISR	FullObsDiscrete	Individual_Q	1.0	0.05	1000	0	True	IndivQLearningSlugs1k/100_10_0_none	none		0.05
IndivQLearningSlugs1k/101_10_1	slugs_decentralized	shields/general_shield	True	-10	False	GridWorld	ISR	FullObsDiscrete	Individual_Q	1.0	0.05	1000	1	True	IndivQLearningSlugs1k/101_10_1_slugs_centralized	slugs_centralized	shields/general_shield	0.05
IndivQLearningSlugs1k/101_10_1	slugs_decentralized	shields/general_shield	True	-10	False	GridWorld	ISR	FullObsDiscrete	Individual_Q	1.0	0.05	1000	1	True	IndivQLearningSlugs1k/101_10_1_slugs_decentralized	slugs_decentralized	shields/general_shield	0.05
IndivQLearningSlugs1k/101_10_1	slugs_decentralized	shields/general_shield	True	-10	False	GridWorld	ISR	FullObsDiscrete	Individual_Q	1.0	0.05	1000	1	True	IndivQLearningSlugs1k/101_10_1_none	none		0.05
IndivQLearningSlugs1k/102_10_2	slugs_decentralized	shields/general_shield	True	-10	False	GridWorld	ISR	FullObsDiscrete	Individual_Q	1.0	0.05	1000	2	True	IndivQLearningSlugs1k/102_10_2_slugs_centralized	slugs_centralized	shields/general_shield	0.05
IndivQLearningSlugs1k/102_10_2	slugs_decentralized	shields/general_shield	True	-10	False	GridWorld	ISR	FullObsDiscrete	Individual_Q	1.0	0.05	1000	2	True	IndivQLearningSlugs1k/102_10_2_slugs_decentralized	slugs_decentralized	shields/general_shield	0.05
IndivQLearningSlugs1k/102_10_2	slugs_decentralized	shields/general_shield	True	-10	False	GridWorld	ISR	FullObsDiscrete	Individual_Q	1.0	0.05	1000	2	True	IndivQLearningSlugs1k/102_10_2_none	none		0.05
IndivQLearningSlugs1k/103_10_3	slugs_decentralized	shields/general_shield	True	-10	False	GridWorld	ISR	FullObsDiscrete	Individual_Q	1.0	0.05	1000	3	True	IndivQLearningSlugs1k/103_10_3_slugs_centralized	slugs_centralized	shields/general_shield	0.05
IndivQLearningSlugs1k/103_10_3	slugs_decentralized	shields/general_shield	True	-10	False	GridWorld	ISR	FullObsDiscrete	Individual_Q	1.0	0.05	1000	3	True	IndivQLearningSlugs1k/103_10_3_slugs_decentralized	slugs_decentralized	shields/general_shield	0.05
IndivQLearningSlugs1k/103_10_3	slugs_decentralized	shields/general_shield	True	-10	False	GridWorld	ISR	FullObsDiscrete	Individual_Q	1.0	0.05	1000	3	True	IndivQLearningSlugs1k/103_10_3_none	none		0.05
IndivQLearningSlugs1k/104_10_4	slugs_decentralized	shields/general_shield	True	-10	False	GridWorld	ISR	FullObsDiscrete	Individual_Q	1.0	0.05	1000	4	True	IndivQLearningSlugs1k/104_10_4_slugs_centralized	slugs_centralized	shields/general_shield	0.05
IndivQLearningSlugs1k/104_10_4	slugs_decentralized	shields/general_shield	True	-10	False	GridWorld	ISR	FullObsDiscrete	Individual_Q	1.0	0.05	1000	4	True	IndivQLearningSlugs1k/104_10_4_slugs_decentralized	slugs_decentralized	shields/general_shield	0.05
IndivQLearningSlugs1k/104_10_4	slugs_decentralized	shields/general_shield	True	-10	False	GridWorld	ISR	FullObsDiscrete	Individual_Q	1.0	0.05	1000	4	True	IndivQLearningSlugs1k/104_10_4_none	none		0.05
IndivQLearningSlugs1k/105_10_5	slugs_decentralized	shields/general_shield	True	-10	False	GridWorld	ISR	FullObsDiscrete	Individual_Q	1.0	0.05	1000	5	True	IndivQLearningSlugs1k/105_10_5_slugs_centralized	slugs_centralized	shields/general_shield	0.05
IndivQLearningSlugs1k/105_10_5	slugs_decentralized	shields/general_shield	True	-10	False	GridWorld	ISR	FullObsDiscrete	Individual_Q	1.0	0.05	1000	5	True	IndivQLearningSlugs1k/105_10_5_slugs_decentralized	slugs_decentralized	shields/general_shield	0.05
IndivQLearningSlugs1k/105_10_5	slugs_decentralized	shields/general_shield	True	-10	False	GridWorld	ISR	FullObsDiscrete	Individual_Q	1.0	0.05	1000	5	True	IndivQLearningSlugs1k/105_10_5_none	none		0.05
IndivQLearningSlugs1k/106_10_6	slugs_decentralized	shields/general_shield	True	-10	False	GridWorld	ISR	FullObsDiscrete	Individual_Q	1.0	0.05	1000	6	True	IndivQLearningSlugs1k/106_10_6_slugs_centralized	slugs_centralized	shields/general_shield	0.05
IndivQLearningSlugs1k/106_10_6	slugs_decentralized	shields/general_shield	True	-10	False	GridWorld	ISR	FullObsDiscrete	Individual_Q	1.0	0.05	1000	6	True	IndivQLearningSlugs1k/106_10_6_slugs_decentralized	slugs_decentralized	shields/general_shield	0.05
IndivQLearningSlugs1k/106_10_6	slugs_decentralized	shields/general_shield	True	-10	False	GridWorld	ISR	FullObsDiscrete	Individual_Q	1.0	0.05	1000	6	True	IndivQLearningSlugs1k/106_10_6_none	none		0.05
IndivQLearningSlugs1k/107_10_7	slugs_decentralized	shields/general_shield	True	-10	False	GridWorld	ISR	FullObsDiscrete	Individual_Q	1.0	0.05	1000	7	True	IndivQLearningSlugs1k/107_10_7_slugs_centralized	slugs_centralized	shields/general_shield	0.05
IndivQLearningSlugs1k/107_10_7	slugs_decentralized	shields/general_shield	True	-10	False	GridWorld	ISR	FullObsDiscrete	Individual_Q	1.0	0.05	1000	7	True	IndivQLearningSlugs1k/107_10_7_slugs_decentralized	slugs_decentralized	shields/general_shield	0.05
IndivQLearningSlugs1k/107_10_7	slugs_decentralized	shields/general_shield	True	-10	False	GridWorld	ISR	FullObsDiscrete	Individual_Q	1.0	0.05	1000	7	True	IndivQLearningSlugs1k/107_10_7_none	none		0.05
IndivQLearningSlugs1k/108_10_8	slugs_decentralized	shields/general_shield	True	-10	False	GridWorld	ISR	FullObsDiscrete	Individual_Q	1.0	0.05	1000	8	True	IndivQLearningSlugs1k/108_10_8_slugs_centralized	slugs_centralized	shields/general_shield	0.05
IndivQLearningSlugs1k/108_10_8	slugs_decentralized	shields/general_shield	True	-10	False	GridWorld	ISR	FullObsDiscrete	Individual_Q	1.0	0.05	1000	8	True	IndivQLearningSlugs1k/108_10_8_slugs_decentralized	slugs_decentralized	shields/general_shield	0.05
IndivQLearningSlugs1k/108_10_8	slugs_decentralized	shields/general_shield	True	-10	False	GridWorld	ISR	FullObsDiscrete	Individual_Q	1.0	0.05	1000	8	True	IndivQLearningSlugs1k/108_10_8_none	none		0.05
IndivQLearningSlugs1k/109_10_9	slugs_decentralized	shields/general_shield	True	-10	False	GridWorld	ISR	FullObsDiscrete	Individual_Q	1.0	0.05	1000	9	True	IndivQLearningSlugs1k/109_10_9_slugs_centralized	slugs_centralized	shields/general_shield	0.05
IndivQLearningSlugs1k/109_10_9	slugs_decentralized	shields/general_shield	True	-10	False	GridWorld	ISR	FullObsDiscrete	Individual_Q	1.0	0.05	1000	9	True	IndivQLearningSlugs1k/109_10_9_slugs_decentralized	slugs_decentralized	shields/general_shield	0.05
IndivQLearningSlugs1k/109_10_9	slugs_decentralized	shields/general_shield	True	-10	False	GridWorld	ISR	FullObsDiscrete	Individual_Q	1.0	0.05	1000	9	True	IndivQLearningSlugs1k/109_10_9_none	none		0.05
IndivQLearningSlugs1k/110_11_0	none		True	-10	False	GridWorld	ISR	FullObsDiscrete	Individual_Q	1.0	0.05	1000	0	True	IndivQLearningSlugs1k/110_11_0_slugs_centralized	slugs_centralized	shields/general_shield	0.05
IndivQLearningSlugs1k/110_11_0	none		True	-10	False	GridWorld	ISR	FullObsDiscrete	Individual_Q	1.0	0.05	1000	0	True	IndivQLearningSlugs1k/110_11_0_slugs_decentralized	slugs_decentralized	shields/general_shield	0.05
IndivQLearningSlugs1k/110_11_0	none		True	-10	False	GridWorld	ISR	FullObsDiscrete	Individual_Q	1.0	0.05	1000	0	True	IndivQLearningSlugs1k/110_11_0_none	none		0.05
IndivQLearningSlugs1k/111_11_1	none		True	-10	False	GridWorld	ISR	FullObsDiscrete	Individual_Q	1.0	0.05	1000	1	True	IndivQLearningSlugs1k/111_11_1_slugs_centralized	slugs_centralized	shields/general_shield	0.05
IndivQLearningSlugs1k/111_11_1	none		True	-10	False	GridWorld	ISR	FullObsDiscrete	Individual_Q	1.0	0.05	1000	1	True	IndivQLearningSlugs1k/111_11_1_slugs_decentralized	slugs_decentralized	shields/general_shield	0.05
IndivQLearningSlugs1k/111_11_1	none		True	-10	False	GridWorld	ISR	FullObsDiscrete	Individual_Q	1.0	0.05	1000	1	True	IndivQLearningSlugs1k/111_11_1_none	none		0.05
IndivQLearningSlugs1k/112_11_2	none		True	-10	False	GridWorld	ISR	FullObsDiscrete	Individual_Q	1.0	0.05	1000	2	True	IndivQLearningSlugs1k/112_11_2_slugs_centralized	slugs_centralized	shields/general_shield	0.05
IndivQLearningSlugs1k/112_11_2	none		True	-10	False	GridWorld	ISR	FullObsDiscrete	Individual_Q	1.0	0.05	1000	2	True	IndivQLearningSlugs1k/112_11_2_slugs_decentralized	slugs_decentralized	shields/general_shield	0.05
IndivQLearningSlugs1k/112_11_2	none		True	-10	False	GridWorld	ISR	FullObsDiscrete	Individual_Q	1.0	0.05	1000	2	True	IndivQLearningSlugs1k/112_11_2_none	none		0.05
IndivQLearningSlugs1k/113_11_3	none		True	-10	False	GridWorld	ISR	FullObsDiscrete	Individual_Q	1.0	0.05	1000	3	True	IndivQLearningSlugs1k/113_11_3_slugs_centralized	slugs_centralized	shields/general_shield	0.05
IndivQLearningSlugs1k/113_11_3	none		True	-10	False	GridWorld	ISR	FullObsDiscrete	Individual_Q	1.0	0.05	1000	3	True	IndivQLearningSlugs1k/113_11_3_slugs_decentralized	slugs_decentralized	shields/general_shield	0.05
IndivQLearningSlugs1k/113_11_3	none		True	-10	False	GridWorld	ISR	FullObsDiscrete	Individual_Q	1.0	0.05	1000	3	True	IndivQLearningSlugs1k/113_11_3_none	none		0.05
IndivQLearningSlugs1k/114_11_4	none		True	-10	False	GridWorld	ISR	FullObsDiscrete	Individual_Q	1.0	0.05	1000	4	True	IndivQLearningSlugs1k/114_11_4_slugs_centralized	slugs_centralized	shields/general_shield	0.05
IndivQLearningSlugs1k/114_11_4	none		True	-10	False	GridWorld	ISR	FullObsDiscrete	Individual_Q	1.0	0.05	1000	4	True	IndivQLearningSlugs1k/114_11_4_slugs_decentralized	slugs_decentralized	shields/general_shield	0.05
IndivQLearningSlugs1k/114_11_4	none		True	-10	False	GridWorld	ISR	FullObsDiscrete	Individual_Q	1.0	0.05	1000	4	True	IndivQLearningSlugs1k/114_11_4_none	none		0.05
IndivQLearningSlugs1k/115_11_5	none		True	-10	False	GridWorld	ISR	FullObsDiscrete	Individual_Q	1.0	0.05	1000	5	True	IndivQLearningSlugs1k/115_11_5_slugs_centralized	slugs_centralized	shields/general_shield	0.05
IndivQLearningSlugs1k/115_11_5	none		True	-10	False	GridWorld	ISR	FullObsDiscrete	Individual_Q	1.0	0.05	1000	5	True	IndivQLearningSlugs1k/115_11_5_slugs_decentralized	slugs_decentralized	shields/general_shield	0.05
IndivQLearningSlugs1k/115_11_5	none		True	-10	False	GridWorld	ISR	FullObsDiscrete	Individual_Q	1.0	0.05	1000	5	True	IndivQLearningSlugs1k/115_11_5_none	none		0.05
IndivQLearningSlugs1k/116_11_6	none		True	-10	False	GridWorld	ISR	FullObsDiscrete	Individual_Q	1.0	0.05	1000	6	True	IndivQLearningSlugs1k/116_11_6_slugs_centralized	slugs_centralized	shields/general_shield	0.05
IndivQLearningSlugs1k/116_11_6	none		True	-10	False	GridWorld	ISR	FullObsDiscrete	Individual_Q	1.0	0.05	1000	6	True	IndivQLearningSlugs1k/116_11_6_slugs_decentralized	slugs_decentralized	shields/general_shield	0.05
IndivQLearningSlugs1k/116_11_6	none		True	-10	False	GridWorld	ISR	FullObsDiscrete	Individual_Q	1.0	0.05	1000	6	True	IndivQLearningSlugs1k/116_11_6_none	none		0.05
IndivQLearningSlugs1k/117_11_7	none		True	-10	False	GridWorld	ISR	FullObsDiscrete	Individual_Q	1.0	0.05	1000	7	True	IndivQLearningSlugs1k/117_11_7_slugs_centralized	slugs_centralized	shields/general_shield	0.05
IndivQLearningSlugs1k/117_11_7	none		True	-10	False	GridWorld	ISR	FullObsDiscrete	Individual_Q	1.0	0.05	1000	7	True	IndivQLearningSlugs1k/117_11_7_slugs_decentralized	slugs_decentralized	shields/general_shield	0.05
IndivQLearningSlugs1k/117_11_7	none		True	-10	False	GridWorld	ISR	FullObsDiscrete	Individual_Q	1.0	0.05	1000	7	True	IndivQLearningSlugs1k/117_11_7_none	none		0.05
IndivQLearningSlugs1k/118_11_8	none		True	-10	False	GridWorld	ISR	FullObsDiscrete	Individual_Q	1.0	0.05	1000	8	True	IndivQLearningSlugs1k/118_11_8_slugs_centralized	slugs_centralized	shields/general_shield	0.05
IndivQLearningSlugs1k/118_11_8	none		True	-10	False	GridWorld	ISR	FullObsDiscrete	Individual_Q	1.0	0.05	1000	8	True	IndivQLearningSlugs1k/118_11_8_slugs_decentralized	slugs_decentralized	shields/general_shield	0.05
IndivQLearningSlugs1k/118_11_8	none		True	-10	False	GridWorld	ISR	FullObsDiscrete	Individual_Q	1.0	0.05	1000	8	True	IndivQLearningSlugs1k/118_11_8_none	none		0.05
IndivQLearningSlugs1k/119_11_9	none		True	-10	False	GridWorld	ISR	FullObsDiscrete	Individual_Q	1.0	0.05	1000	9	True	IndivQLearningSlugs1k/119_11_9_slugs_centralized	slugs_centralized	shields/general_shield	0.05
IndivQLearningSlugs1k/119_11_9	none		True	-10	False	GridWorld	ISR	FullObsDiscrete	Individual_Q	1.0	0.05	1000	9	True	IndivQLearningSlugs1k/119_11_9_slugs_decentralized	slugs_decentralized	shields/general_shield	0.05
IndivQLearningSlugs1k/119_11_9	none		True	-10	False	GridWorld	ISR	FullObsDiscrete	Individual_Q	1.0	0.05	1000	9	True	IndivQLearningSlugs1k/119_11_9_none	none		0.05
IndivQLearningSlugs1k/120_12_0	slugs_centralized	shields/general_shield	True	-10	True	GridWorld	MIT	FullObsDiscrete	Individual_Q	1.0	0.05	1000	0	True	IndivQLearningSlugs1k/120_12_0_slugs_centralized	slugs_centralized	shields/general_shield	0.05
IndivQLearningSlugs1k/120_12_0	slugs_centralized	shields/general_shield	True	-10	True	GridWorld	MIT	FullObsDiscrete	Individual_Q	1.0	0.05	1000	0	True	IndivQLearningSlugs1k/120_12_0_slugs_decentralized	slugs_decentralized	shields/general_shield	0.05
IndivQLearningSlugs1k/120_12_0	slugs_centralized	shields/general_shield	True	-10	True	GridWorld	MIT	FullObsDiscrete	Individual_Q	1.0	0.05	1000	0	True	IndivQLearningSlugs1k/120_12_0_none	none		0.05
IndivQLearningSlugs1k/121_12_1	slugs_centralized	shields/general_shield	True	-10	True	GridWorld	MIT	FullObsDiscrete	Individual_Q	1.0	0.05	1000	1	True	IndivQLearningSlugs1k/121_12_1_slugs_centralized	slugs_centralized	shields/general_shield	0.05
IndivQLearningSlugs1k/121_12_1	slugs_centralized	shields/general_shield	True	-10	True	GridWorld	MIT	FullObsDiscrete	Individual_Q	1.0	0.05	1000	1	True	IndivQLearningSlugs1k/121_12_1_slugs_decentralized	slugs_decentralized	shields/general_shield	0.05
IndivQLearningSlugs1k/121_12_1	slugs_centralized	shields/general_shield	True	-10	True	GridWorld	MIT	FullObsDiscrete	Individual_Q	1.0	0.05	1000	1	True	IndivQLearningSlugs1k/121_12_1_none	none		0.05
IndivQLearningSlugs1k/122_12_2	slugs_centralized	shields/general_shield	True	-10	True	GridWorld	MIT	FullObsDiscrete	Individual_Q	1.0	0.05	1000	2	True	IndivQLearningSlugs1k/122_12_2_slugs_centralized	slugs_centralized	shields/general_shield	0.05
IndivQLearningSlugs1k/122_12_2	slugs_centralized	shields/general_shield	True	-10	True	GridWorld	MIT	FullObsDiscrete	Individual_Q	1.0	0.05	1000	2	True	IndivQLearningSlugs1k/122_12_2_slugs_decentralized	slugs_decentralized	shields/general_shield	0.05
IndivQLearningSlugs1k/122_12_2	slugs_centralized	shields/general_shield	True	-10	True	GridWorld	MIT	FullObsDiscrete	Individual_Q	1.0	0.05	1000	2	True	IndivQLearningSlugs1k/122_12_2_none	none		0.05
IndivQLearningSlugs1k/123_12_3	slugs_centralized	shields/general_shield	True	-10	True	GridWorld	MIT	FullObsDiscrete	Individual_Q	1.0	0.05	1000	3	True	IndivQLearningSlugs1k/123_12_3_slugs_centralized	slugs_centralized	shields/general_shield	0.05
IndivQLearningSlugs1k/123_12_3	slugs_centralized	shields/general_shield	True	-10	True	GridWorld	MIT	FullObsDiscrete	Individual_Q	1.0	0.05	1000	3	True	IndivQLearningSlugs1k/123_12_3_slugs_decentralized	slugs_decentralized	shields/general_shield	0.05
IndivQLearningSlugs1k/123_12_3	slugs_centralized	shields/general_shield	True	-10	True	GridWorld	MIT	FullObsDiscrete	Individual_Q	1.0	0.05	1000	3	True	IndivQLearningSlugs1k/123_12_3_none	none		0.05
IndivQLearningSlugs1k/124_12_4	slugs_centralized	shields/general_shield	True	-10	True	GridWorld	MIT	FullObsDiscrete	Individual_Q	1.0	0.05	1000	4	True	IndivQLearningSlugs1k/124_12_4_slugs_centralized	slugs_centralized	shields/general_shield	0.05
IndivQLearningSlugs1k/124_12_4	slugs_centralized	shields/general_shield	True	-10	True	GridWorld	MIT	FullObsDiscrete	Individual_Q	1.0	0.05	1000	4	True	IndivQLearningSlugs1k/124_12_4_slugs_decentralized	slugs_decentralized	shields/general_shield	0.05
IndivQLearningSlugs1k/124_12_4	slugs_centralized	shields/general_shield	True	-10	True	GridWorld	MIT	FullObsDiscrete	Individual_Q	1.0	0.05	1000	4	True	IndivQLearningSlugs1k/124_12_4_none	none		0.05
IndivQLearningSlugs1k/125_12_5	slugs_centralized	shields/general_shield	True	-10	True	GridWorld	MIT	FullObsDiscrete	Individual_Q	1.0	0.05	1000	5	True	IndivQLearningSlugs1k/125_12_5_slugs_centralized	slugs_centralized	shields/general_shield	0.05
IndivQLearningSlugs1k/125_12_5	slugs_centralized	shields/general_shield	True	-10	True	GridWorld	MIT	FullObsDiscrete	Individual_Q	1.0	0.05	1000	5	True	IndivQLearningSlugs1k/125_12_5_slugs_decentralized	slugs_decentralized	shields/general_shield	0.05
IndivQLearningSlugs1k/125_12_5	slugs_centralized	shields/general_shield	True	-10	True	GridWorld	MIT	FullObsDiscrete	Individual_Q	1.0	0.05	1000	5	True	IndivQLearningSlugs1k/125_12_5_none	none		0.05
IndivQLearningSlugs1k/126_12_6	slugs_centralized	shields/general_shield	True	-10	True	GridWorld	MIT	FullObsDiscrete	Individual_Q	1.0	0.05	1000	6	True	IndivQLearningSlugs1k/126_12_6_slugs_centralized	slugs_centralized	shields/general_shield	0.05
IndivQLearningSlugs1k/126_12_6	slugs_centralized	shields/general_shield	True	-10	True	GridWorld	MIT	FullObsDiscrete	Individual_Q	1.0	0.05	1000	6	True	IndivQLearningSlugs1k/126_12_6_slugs_decentralized	slugs_decentralized	shields/general_shield	0.05
IndivQLearningSlugs1k/126_12_6	slugs_centralized	shields/general_shield	True	-10	True	GridWorld	MIT	FullObsDiscrete	Individual_Q	1.0	0.05	1000	6	True	IndivQLearningSlugs1k/126_12_6_none	none		0.05
IndivQLearningSlugs1k/127_12_7	slugs_centralized	shields/general_shield	True	-10	True	GridWorld	MIT	FullObsDiscrete	Individual_Q	1.0	0.05	1000	7	True	IndivQLearningSlugs1k/127_12_7_slugs_centralized	slugs_centralized	shields/general_shield	0.05
IndivQLearningSlugs1k/127_12_7	slugs_centralized	shields/general_shield	True	-10	True	GridWorld	MIT	FullObsDiscrete	Individual_Q	1.0	0.05	1000	7	True	IndivQLearningSlugs1k/127_12_7_slugs_decentralized	slugs_decentralized	shields/general_shield	0.05
IndivQLearningSlugs1k/127_12_7	slugs_centralized	shields/general_shield	True	-10	True	GridWorld	MIT	FullObsDiscrete	Individual_Q	1.0	0.05	1000	7	True	IndivQLearningSlugs1k/127_12_7_none	none		0.05
IndivQLearningSlugs1k/128_12_8	slugs_centralized	shields/general_shield	True	-10	True	GridWorld	MIT	FullObsDiscrete	Individual_Q	1.0	0.05	1000	8	True	IndivQLearningSlugs1k/128_12_8_slugs_centralized	slugs_centralized	shields/general_shield	0.05
IndivQLearningSlugs1k/128_12_8	slugs_centralized	shields/general_shield	True	-10	True	GridWorld	MIT	FullObsDiscrete	Individual_Q	1.0	0.05	1000	8	True	IndivQLearningSlugs1k/128_12_8_slugs_decentralized	slugs_decentralized	shields/general_shield	0.05
IndivQLearningSlugs1k/128_12_8	slugs_centralized	shields/general_shield	True	-10	True	GridWorld	MIT	FullObsDiscrete	Individual_Q	1.0	0.05	1000	8	True	IndivQLearningSlugs1k/128_12_8_none	none		0.05
IndivQLearningSlugs1k/129_12_9	slugs_centralized	shields/general_shield	True	-10	True	GridWorld	MIT	FullObsDiscrete	Individual_Q	1.0	0.05	1000	9	True	IndivQLearningSlugs1k/129_12_9_slugs_centralized	slugs_centralized	shields/general_shield	0.05
IndivQLearningSlugs1k/129_12_9	slugs_centralized	shields/general_shield	True	-10	True	GridWorld	MIT	FullObsDiscrete	Individual_Q	1.0	0.05	1000	9	True	IndivQLearningSlugs1k/129_12_9_slugs_decentralized	slugs_decentralized	shields/general_shield	0.05
IndivQLearningSlugs1k/129_12_9	slugs_centralized	shields/general_shield	True	-10	True	GridWorld	MIT	FullObsDiscrete	Individual_Q	1.0	0.05	1000	9	True	IndivQLearningSlugs1k/129_12_9_none	none		0.05
IndivQLearningSlugs1k/130_13_0	slugs_decentralized	shields/general_shield	True	-10	True	GridWorld	MIT	FullObsDiscrete	Individual_Q	1.0	0.05	1000	0	True	IndivQLearningSlugs1k/130_13_0_slugs_centralized	slugs_centralized	shields/general_shield	0.05
IndivQLearningSlugs1k/130_13_0	slugs_decentralized	shields/general_shield	True	-10	True	GridWorld	MIT	FullObsDiscrete	Individual_Q	1.0	0.05	1000	0	True	IndivQLearningSlugs1k/130_13_0_slugs_decentralized	slugs_decentralized	shields/general_shield	0.05
IndivQLearningSlugs1k/130_13_0	slugs_decentralized	shields/general_shield	True	-10	True	GridWorld	MIT	FullObsDiscrete	Individual_Q	1.0	0.05	1000	0	True	IndivQLearningSlugs1k/130_13_0_none	none		0.05
IndivQLearningSlugs1k/131_13_1	slugs_decentralized	shields/general_shield	True	-10	True	GridWorld	MIT	FullObsDiscrete	Individual_Q	1.0	0.05	1000	1	True	IndivQLearningSlugs1k/131_13_1_slugs_centralized	slugs_centralized	shields/general_shield	0.05
IndivQLearningSlugs1k/131_13_1	slugs_decentralized	shields/general_shield	True	-10	True	GridWorld	MIT	FullObsDiscrete	Individual_Q	1.0	0.05	1000	1	True	IndivQLearningSlugs1k/131_13_1_slugs_decentralized	slugs_decentralized	shields/general_shield	0.05
IndivQLearningSlugs1k/131_13_1	slugs_decentralized	shields/general_shield	True	-10	True	GridWorld	MIT	FullObsDiscrete	Individual_Q	1.0	0.05	1000	1	True	IndivQLearningSlugs1k/131_13_1_none	none		0.05
IndivQLearningSlugs1k/132_13_2	slugs_decentralized	shields/general_shield	True	-10	True	GridWorld	MIT	FullObsDiscrete	Individual_Q	1.0	0.05	1000	2	True	IndivQLearningSlugs1k/132_13_2_slugs_centralized	slugs_centralized	shields/general_shield	0.05
IndivQLearningSlugs1k/132_13_2	slugs_decentralized	shields/general_shield	True	-10	True	GridWorld	MIT	FullObsDiscrete	Individual_Q	1.0	0.05	1000	2	True	IndivQLearningSlugs1k/132_13_2_slugs_decentralized	slugs_decentralized	shields/general_shield	0.05
IndivQLearningSlugs1k/132_13_2	slugs_decentralized	shields/general_shield	True	-10	True	GridWorld	MIT	FullObsDiscrete	Individual_Q	1.0	0.05	1000	2	True	IndivQLearningSlugs1k/132_13_2_none	none		0.05
IndivQLearningSlugs1k/133_13_3	slugs_decentralized	shields/general_shield	True	-10	True	GridWorld	MIT	FullObsDiscrete	Individual_Q	1.0	0.05	1000	3	True	IndivQLearningSlugs1k/133_13_3_slugs_centralized	slugs_centralized	shields/general_shield	0.05
IndivQLearningSlugs1k/133_13_3	slugs_decentralized	shields/general_shield	True	-10	True	GridWorld	MIT	FullObsDiscrete	Individual_Q	1.0	0.05	1000	3	True	IndivQLearningSlugs1k/133_13_3_slugs_decentralized	slugs_decentralized	shields/general_shield	0.05
IndivQLearningSlugs1k/133_13_3	slugs_decentralized	shields/general_shield	True	-10	True	GridWorld	MIT	FullObsDiscrete	Individual_Q	1.0	0.05	1000	3	True	IndivQLearningSlugs1k/133_13_3_none	none		0.05
IndivQLearningSlugs1k/134_13_4	slugs_decentralized	shields/general_shield	True	-10	True	GridWorld	MIT	FullObsDiscrete	Individual_Q	1.0	0.05	1000	4	True	IndivQLearningSlugs1k/134_13_4_slugs_centralized	slugs_centralized	shields/general_shield	0.05
IndivQLearningSlugs1k/134_13_4	slugs_decentralized	shields/general_shield	True	-10	True	GridWorld	MIT	FullObsDiscrete	Individual_Q	1.0	0.05	1000	4	True	IndivQLearningSlugs1k/134_13_4_slugs_decentralized	slugs_decentralized	shields/general_shield	0.05
IndivQLearningSlugs1k/134_13_4	slugs_decentralized	shields/general_shield	True	-10	True	GridWorld	MIT	FullObsDiscrete	Individual_Q	1.0	0.05	1000	4	True	IndivQLearningSlugs1k/134_13_4_none	none		0.05
IndivQLearningSlugs1k/135_13_5	slugs_decentralized	shields/general_shield	True	-10	True	GridWorld	MIT	FullObsDiscrete	Individual_Q	1.0	0.05	1000	5	True	IndivQLearningSlugs1k/135_13_5_slugs_centralized	slugs_centralized	shields/general_shield	0.05
IndivQLearningSlugs1k/135_13_5	slugs_decentralized	shields/general_shield	True	-10	True	GridWorld	MIT	FullObsDiscrete	Individual_Q	1.0	0.05	1000	5	True	IndivQLearningSlugs1k/135_13_5_slugs_decentralized	slugs_decentralized	shields/general_shield	0.05
IndivQLearningSlugs1k/135_13_5	slugs_decentralized	shields/general_shield	True	-10	True	GridWorld	MIT	FullObsDiscrete	Individual_Q	1.0	0.05	1000	5	True	IndivQLearningSlugs1k/135_13_5_none	none		0.05
IndivQLearningSlugs1k/136_13_6	slugs_decentralized	shields/general_shield	True	-10	True	GridWorld	MIT	FullObsDiscrete	Individual_Q	1.0	0.05	1000	6	True	IndivQLearningSlugs1k/136_13_6_slugs_centralized	slugs_centralized	shields/general_shield	0.05
IndivQLearningSlugs1k/136_13_6	slugs_decentralized	shields/general_shield	True	-10	True	GridWorld	MIT	FullObsDiscrete	Individual_Q	1.0	0.05	1000	6	True	IndivQLearningSlugs1k/136_13_6_slugs_decentralized	slugs_decentralized	shields/general_shield	0.05
IndivQLearningSlugs1k/136_13_6	slugs_decentralized	shields/general_shield	True	-10	True	GridWorld	MIT	FullObsDiscrete	Individual_Q	1.0	0.05	1000	6	True	IndivQLearningSlugs1k/136_13_6_none	none		0.05
IndivQLearningSlugs1k/137_13_7	slugs_decentralized	shields/general_shield	True	-10	True	GridWorld	MIT	FullObsDiscrete	Individual_Q	1.0	0.05	1000	7	True	IndivQLearningSlugs1k/137_13_7_slugs_centralized	slugs_centralized	shields/general_shield	0.05
IndivQLearningSlugs1k/137_13_7	slugs_decentralized	shields/general_shield	True	-10	True	GridWorld	MIT	FullObsDiscrete	Individual_Q	1.0	0.05	1000	7	True	IndivQLearningSlugs1k/137_13_7_slugs_decentralized	slugs_decentralized	shields/general_shield	0.05
IndivQLearningSlugs1k/137_13_7	slugs_decentralized	shields/general_shield	True	-10	True	GridWorld	MIT	FullObsDiscrete	Individual_Q	1.0	0.05	1000	7	True	IndivQLearningSlugs1k/137_13_7_none	none		0.05
IndivQLearningSlugs1k/138_13_8	slugs_decentralized	shields/general_shield	True	-10	True	GridWorld	MIT	FullObsDiscrete	Individual_Q	1.0	0.05	1000	8	True	IndivQLearningSlugs1k/138_13_8_slugs_centralized	slugs_centralized	shields/general_shield	0.05
IndivQLearningSlugs1k/138_13_8	slugs_decentralized	shields/general_shield	True	-10	True	GridWorld	MIT	FullObsDiscrete	Individual_Q	1.0	0.05	1000	8	True	IndivQLearningSlugs1k/138_13_8_slugs_decentralized	slugs_decentralized	shields/general_shield	0.05
IndivQLearningSlugs1k/138_13_8	slugs_decentralized	shields/general_shield	True	-10	True	GridWorld	MIT	FullObsDiscrete	Individual_Q	1.0	0.05	1000	8	True	IndivQLearningSlugs1k/138_13_8_none	none		0.05
IndivQLearningSlugs1k/139_13_9	slugs_decentralized	shields/general_shield	True	-10	True	GridWorld	MIT	FullObsDiscrete	Individual_Q	1.0	0.05	1000	9	True	IndivQLearningSlugs1k/139_13_9_slugs_centralized	slugs_centralized	shields/general_shield	0.05
IndivQLearningSlugs1k/139_13_9	slugs_decentralized	shields/general_shield	True	-10	True	GridWorld	MIT	FullObsDiscrete	Individual_Q	1.0	0.05	1000	9	True	IndivQLearningSlugs1k/139_13_9_slugs_decentralized	slugs_decentralized	shields/general_shield	0.05
IndivQLearningSlugs1k/139_13_9	slugs_decentralized	shields/general_shield	True	-10	True	GridWorld	MIT	FullObsDiscrete	Individual_Q	1.0	0.05	1000	9	True	IndivQLearningSlugs1k/139_13_9_none	none		0.05
IndivQLearningSlugs1k/140_14_0	none		True	-10	True	GridWorld	MIT	FullObsDiscrete	Individual_Q	1.0	0.05	1000	0	True	IndivQLearningSlugs1k/140_14_0_slugs_centralized	slugs_centralized	shields/general_shield	0.05
IndivQLearningSlugs1k/140_14_0	none		True	-10	True	GridWorld	MIT	FullObsDiscrete	Individual_Q	1.0	0.05	1000	0	True	IndivQLearningSlugs1k/140_14_0_slugs_decentralized	slugs_decentralized	shields/general_shield	0.05
IndivQLearningSlugs1k/140_14_0	none		True	-10	True	GridWorld	MIT	FullObsDiscrete	Individual_Q	1.0	0.05	1000	0	True	IndivQLearningSlugs1k/140_14_0_none	none		0.05
IndivQLearningSlugs1k/141_14_1	none		True	-10	True	GridWorld	MIT	FullObsDiscrete	Individual_Q	1.0	0.05	1000	1	True	IndivQLearningSlugs1k/141_14_1_slugs_centralized	slugs_centralized	shields/general_shield	0.05
IndivQLearningSlugs1k/141_14_1	none		True	-10	True	GridWorld	MIT	FullObsDiscrete	Individual_Q	1.0	0.05	1000	1	True	IndivQLearningSlugs1k/141_14_1_slugs_decentralized	slugs_decentralized	shields/general_shield	0.05
IndivQLearningSlugs1k/141_14_1	none		True	-10	True	GridWorld	MIT	FullObsDiscrete	Individual_Q	1.0	0.05	1000	1	True	IndivQLearningSlugs1k/141_14_1_none	none		0.05
IndivQLearningSlugs1k/142_14_2	none		True	-10	True	GridWorld	MIT	FullObsDiscrete	Individual_Q	1.0	0.05	1000	2	True	IndivQLearningSlugs1k/142_14_2_slugs_centralized	slugs_centralized	shields/general_shield	0.05
IndivQLearningSlugs1k/142_14_2	none		True	-10	True	GridWorld	MIT	FullObsDiscrete	Individual_Q	1.0	0.05	1000	2	True	IndivQLearningSlugs1k/142_14_2_slugs_decentralized	slugs_decentralized	shields/general_shield	0.05
IndivQLearningSlugs1k/142_14_2	none		True	-10	True	GridWorld	MIT	FullObsDiscrete	Individual_Q	1.0	0.05	1000	2	True	IndivQLearningSlugs1k/142_14_2_none	none		0.05
IndivQLearningSlugs1k/143_14_3	none		True	-10	True	GridWorld	MIT	FullObsDiscrete	Individual_Q	1.0	0.05	1000	3	True	IndivQLearningSlugs1k/143_14_3_slugs_centralized	slugs_centralized	shields/general_shield	0.05
IndivQLearningSlugs1k/143_14_3	none		True	-10	True	GridWorld	MIT	FullObsDiscrete	Individual_Q	1.0	0.05	1000	3	True	IndivQLearningSlugs1k/143_14_3_slugs_decentralized	slugs_decentralized	shields/general_shield	0.05
IndivQLearningSlugs1k/143_14_3	none		True	-10	True	GridWorld	MIT	FullObsDiscrete	Individual_Q	1.0	0.05	1000	3	True	IndivQLearningSlugs1k/143_14_3_none	none		0.05
IndivQLearningSlugs1k/144_14_4	none		True	-10	True	GridWorld	MIT	FullObsDiscrete	Individual_Q	1.0	0.05	1000	4	True	IndivQLearningSlugs1k/144_14_4_slugs_centralized	slugs_centralized	shields/general_shield	0.05
IndivQLearningSlugs1k/144_14_4	none		True	-10	True	GridWorld	MIT	FullObsDiscrete	Individual_Q	1.0	0.05	1000	4	True	IndivQLearningSlugs1k/144_14_4_slugs_decentralized	slugs_decentralized	shields/general_shield	0.05
IndivQLearningSlugs1k/144_14_4	none		True	-10	True	GridWorld	MIT	FullObsDiscrete	Individual_Q	1.0	0.05	1000	4	True	IndivQLearningSlugs1k/144_14_4_none	none		0.05
IndivQLearningSlugs1k/145_14_5	none		True	-10	True	GridWorld	MIT	FullObsDiscrete	Individual_Q	1.0	0.05	1000	5	True	IndivQLearningSlugs1k/145_14_5_slugs_centralized	slugs_centralized	shields/general_shield	0.05
IndivQLearningSlugs1k/145_14_5	none		True	-10	True	GridWorld	MIT	FullObsDiscrete	Individual_Q	1.0	0.05	1000	5	True	IndivQLearningSlugs1k/145_14_5_slugs_decentralized	slugs_decentralized	shields/general_shield	0.05
IndivQLearningSlugs1k/145_14_5	none		True	-10	True	GridWorld	MIT	FullObsDiscrete	Individual_Q	1.0	0.05	1000	5	True	IndivQLearningSlugs1k/145_14_5_none	none		0.05
IndivQLearningSlugs1k/146_14_6	none		True	-10	True	GridWorld	MIT	FullObsDiscrete	Individual_Q	1.0	0.05	1000	6	True	IndivQLearningSlugs1k/146_14_6_slugs_centralized	slugs_centralized	shields/general_shield	0.05
IndivQLearningSlugs1k/146_14_6	none		True	-10	True	GridWorld	MIT	FullObsDiscrete	Individual_Q	1.0	0.05	1000	6	True	IndivQLearningSlugs1k/146_14_6_slugs_decentralized	slugs_decentralized	shields/general_shield	0.05
IndivQLearningSlugs1k/146_14_6	none		True	-10	True	GridWorld	MIT	FullObsDiscrete	Individual_Q	1.0	0.05	1000	6	True	IndivQLearningSlugs1k/146_14_6_none	none		0.05
IndivQLearningSlugs1k/147_14_7	none		True	-10	True	GridWorld	MIT	FullObsDiscrete	Individual_Q	1.0	0.05	1000	7	True	IndivQLearningSlugs1k/147_14_7_slugs_centralized	slugs_centralized	shields/general_shield	0.05
IndivQLearningSlugs1k/147_14_7	none		True	-10	True	GridWorld	MIT	FullObsDiscrete	Individual_Q	1.0	0.05	1000	7	True	IndivQLearningSlugs1k/147_14_7_slugs_decentralized	slugs_decentralized	shields/general_shield	0.05
IndivQLearningSlugs1k/147_14_7	none		True	-10	True	GridWorld	MIT	FullObsDiscrete	Individual_Q	1.0	0.05	1000	7	True	IndivQLearningSlugs1k/147_14_7_none	none		0.05
IndivQLearningSlugs1k/148_14_8	none		True	-10	True	GridWorld	MIT	FullObsDiscrete	Individual_Q	1.0	0.05	1000	8	True	IndivQLearningSlugs1k/148_14_8_slugs_centralized	slugs_centralized	shields/general_shield	0.05
IndivQLearningSlugs1k/148_14_8	none		True	-10	True	GridWorld	MIT	FullObsDiscrete	Individual_Q	1.0	0.05	1000	8	True	IndivQLearningSlugs1k/148_14_8_slugs_decentralized	slugs_decentralized	shields/general_shield	0.05
IndivQLearningSlugs1k/148_14_8	none		True	-10	True	GridWorld	MIT	FullObsDiscrete	Individual_Q	1.0	0.05	1000	8	True	IndivQLearningSlugs1k/148_14_8_none	none		0.05
IndivQLearningSlugs1k/149_14_9	none		True	-10	True	GridWorld	MIT	FullObsDiscrete	Individual_Q	1.0	0.05	1000	9	True	IndivQLearningSlugs1k/149_14_9_slugs_centralized	slugs_centralized	shields/general_shield	0.05
IndivQLearningSlugs1k/149_14_9	none		True	-10	True	GridWorld	MIT	FullObsDiscrete	Individual_Q	1.0	0.05	1000	9	True	IndivQLearningSlugs1k/149_14_9_slugs_decentralized	slugs_decentralized	shields/general_shield	0.05
IndivQLearningSlugs1k/149_14_9	none		True	-10	True	GridWorld	MIT	FullObsDiscrete	Individual_Q	1.0	0.05	1000	9	True	IndivQLearningSlugs1k/149_14_9_none	none		0.05
IndivQLearningSlugs1k/150_15_0	slugs_centralized	shields/general_shield	True	-10	False	GridWorld	MIT	FullObsDiscrete	Individual_Q	1.0	0.05	1000	0	True	IndivQLearningSlugs1k/150_15_0_slugs_centralized	slugs_centralized	shields/general_shield	0.05
IndivQLearningSlugs1k/150_15_0	slugs_centralized	shields/general_shield	True	-10	False	GridWorld	MIT	FullObsDiscrete	Individual_Q	1.0	0.05	1000	0	True	IndivQLearningSlugs1k/150_15_0_slugs_decentralized	slugs_decentralized	shields/general_shield	0.05
IndivQLearningSlugs1k/150_15_0	slugs_centralized	shields/general_shield	True	-10	False	GridWorld	MIT	FullObsDiscrete	Individual_Q	1.0	0.05	1000	0	True	IndivQLearningSlugs1k/150_15_0_none	none		0.05
IndivQLearningSlugs1k/151_15_1	slugs_centralized	shields/general_shield	True	-10	False	GridWorld	MIT	FullObsDiscrete	Individual_Q	1.0	0.05	1000	1	True	IndivQLearningSlugs1k/151_15_1_slugs_centralized	slugs_centralized	shields/general_shield	0.05
IndivQLearningSlugs1k/151_15_1	slugs_centralized	shields/general_shield	True	-10	False	GridWorld	MIT	FullObsDiscrete	Individual_Q	1.0	0.05	1000	1	True	IndivQLearningSlugs1k/151_15_1_slugs_decentralized	slugs_decentralized	shields/general_shield	0.05
IndivQLearningSlugs1k/151_15_1	slugs_centralized	shields/general_shield	True	-10	False	GridWorld	MIT	FullObsDiscrete	Individual_Q	1.0	0.05	1000	1	True	IndivQLearningSlugs1k/151_15_1_none	none		0.05
IndivQLearningSlugs1k/152_15_2	slugs_centralized	shields/general_shield	True	-10	False	GridWorld	MIT	FullObsDiscrete	Individual_Q	1.0	0.05	1000	2	True	IndivQLearningSlugs1k/152_15_2_slugs_centralized	slugs_centralized	shields/general_shield	0.05
IndivQLearningSlugs1k/152_15_2	slugs_centralized	shields/general_shield	True	-10	False	GridWorld	MIT	FullObsDiscrete	Individual_Q	1.0	0.05	1000	2	True	IndivQLearningSlugs1k/152_15_2_slugs_decentralized	slugs_decentralized	shields/general_shield	0.05
IndivQLearningSlugs1k/152_15_2	slugs_centralized	shields/general_shield	True	-10	False	GridWorld	MIT	FullObsDiscrete	Individual_Q	1.0	0.05	1000	2	True	IndivQLearningSlugs1k/152_15_2_none	none		0.05
IndivQLearningSlugs1k/153_15_3	slugs_centralized	shields/general_shield	True	-10	False	GridWorld	MIT	FullObsDiscrete	Individual_Q	1.0	0.05	1000	3	True	IndivQLearningSlugs1k/153_15_3_slugs_centralized	slugs_centralized	shields/general_shield	0.05
IndivQLearningSlugs1k/153_15_3	slugs_centralized	shields/general_shield	True	-10	False	GridWorld	MIT	FullObsDiscrete	Individual_Q	1.0	0.05	1000	3	True	IndivQLearningSlugs1k/153_15_3_slugs_decentralized	slugs_decentralized	shields/general_shield	0.05
IndivQLearningSlugs1k/153_15_3	slugs_centralized	shields/general_shield	True	-10	False	GridWorld	MIT	FullObsDiscrete	Individual_Q	1.0	0.05	1000	3	True	IndivQLearningSlugs1k/153_15_3_none	none		0.05
IndivQLearningSlugs1k/154_15_4	slugs_centralized	shields/general_shield	True	-10	False	GridWorld	MIT	FullObsDiscrete	Individual_Q	1.0	0.05	1000	4	True	IndivQLearningSlugs1k/154_15_4_slugs_centralized	slugs_centralized	shields/general_shield	0.05
IndivQLearningSlugs1k/154_15_4	slugs_centralized	shields/general_shield	True	-10	False	GridWorld	MIT	FullObsDiscrete	Individual_Q	1.0	0.05	1000	4	True	IndivQLearningSlugs1k/154_15_4_slugs_decentralized	slugs_decentralized	shields/general_shield	0.05
IndivQLearningSlugs1k/154_15_4	slugs_centralized	shields/general_shield	True	-10	False	GridWorld	MIT	FullObsDiscrete	Individual_Q	1.0	0.05	1000	4	True	IndivQLearningSlugs1k/154_15_4_none	none		0.05
IndivQLearningSlugs1k/155_15_5	slugs_centralized	shields/general_shield	True	-10	False	GridWorld	MIT	FullObsDiscrete	Individual_Q	1.0	0.05	1000	5	True	IndivQLearningSlugs1k/155_15_5_slugs_centralized	slugs_centralized	shields/general_shield	0.05
IndivQLearningSlugs1k/155_15_5	slugs_centralized	shields/general_shield	True	-10	False	GridWorld	MIT	FullObsDiscrete	Individual_Q	1.0	0.05	1000	5	True	IndivQLearningSlugs1k/155_15_5_slugs_decentralized	slugs_decentralized	shields/general_shield	0.05
IndivQLearningSlugs1k/155_15_5	slugs_centralized	shields/general_shield	True	-10	False	GridWorld	MIT	FullObsDiscrete	Individual_Q	1.0	0.05	1000	5	True	IndivQLearningSlugs1k/155_15_5_none	none		0.05
IndivQLearningSlugs1k/156_15_6	slugs_centralized	shields/general_shield	True	-10	False	GridWorld	MIT	FullObsDiscrete	Individual_Q	1.0	0.05	1000	6	True	IndivQLearningSlugs1k/156_15_6_slugs_centralized	slugs_centralized	shields/general_shield	0.05
IndivQLearningSlugs1k/156_15_6	slugs_centralized	shields/general_shield	True	-10	False	GridWorld	MIT	FullObsDiscrete	Individual_Q	1.0	0.05	1000	6	True	IndivQLearningSlugs1k/156_15_6_slugs_decentralized	slugs_decentralized	shields/general_shield	0.05
IndivQLearningSlugs1k/156_15_6	slugs_centralized	shields/general_shield	True	-10	False	GridWorld	MIT	FullObsDiscrete	Individual_Q	1.0	0.05	1000	6	True	IndivQLearningSlugs1k/156_15_6_none	none		0.05
IndivQLearningSlugs1k/157_15_7	slugs_centralized	shields/general_shield	True	-10	False	GridWorld	MIT	FullObsDiscrete	Individual_Q	1.0	0.05	1000	7	True	IndivQLearningSlugs1k/157_15_7_slugs_centralized	slugs_centralized	shields/general_shield	0.05
IndivQLearningSlugs1k/157_15_7	slugs_centralized	shields/general_shield	True	-10	False	GridWorld	MIT	FullObsDiscrete	Individual_Q	1.0	0.05	1000	7	True	IndivQLearningSlugs1k/157_15_7_slugs_decentralized	slugs_decentralized	shields/general_shield	0.05
IndivQLearningSlugs1k/157_15_7	slugs_centralized	shields/general_shield	True	-10	False	GridWorld	MIT	FullObsDiscrete	Individual_Q	1.0	0.05	1000	7	True	IndivQLearningSlugs1k/157_15_7_none	none		0.05
IndivQLearningSlugs1k/158_15_8	slugs_centralized	shields/general_shield	True	-10	False	GridWorld	MIT	FullObsDiscrete	Individual_Q	1.0	0.05	1000	8	True	IndivQLearningSlugs1k/158_15_8_slugs_centralized	slugs_centralized	shields/general_shield	0.05
IndivQLearningSlugs1k/158_15_8	slugs_centralized	shields/general_shield	True	-10	False	GridWorld	MIT	FullObsDiscrete	Individual_Q	1.0	0.05	1000	8	True	IndivQLearningSlugs1k/158_15_8_slugs_decentralized	slugs_decentralized	shields/general_shield	0.05
IndivQLearningSlugs1k/158_15_8	slugs_centralized	shields/general_shield	True	-10	False	GridWorld	MIT	FullObsDiscrete	Individual_Q	1.0	0.05	1000	8	True	IndivQLearningSlugs1k/158_15_8_none	none		0.05
IndivQLearningSlugs1k/159_15_9	slugs_centralized	shields/general_shield	True	-10	False	GridWorld	MIT	FullObsDiscrete	Individual_Q	1.0	0.05	1000	9	True	IndivQLearningSlugs1k/159_15_9_slugs_centralized	slugs_centralized	shields/general_shield	0.05
IndivQLearningSlugs1k/159_15_9	slugs_centralized	shields/general_shield	True	-10	False	GridWorld	MIT	FullObsDiscrete	Individual_Q	1.0	0.05	1000	9	True	IndivQLearningSlugs1k/159_15_9_slugs_decentralized	slugs_decentralized	shields/general_shield	0.05
IndivQLearningSlugs1k/159_15_9	slugs_centralized	shields/general_shield	True	-10	False	GridWorld	MIT	FullObsDiscrete	Individual_Q	1.0	0.05	1000	9	True	IndivQLearningSlugs1k/159_15_9_none	none		0.05
IndivQLearningSlugs1k/160_16_0	slugs_decentralized	shields/general_shield	True	-10	False	GridWorld	MIT	FullObsDiscrete	Individual_Q	1.0	0.05	1000	0	True	IndivQLearningSlugs1k/160_16_0_slugs_centralized	slugs_centralized	shields/general_shield	0.05
IndivQLearningSlugs1k/160_16_0	slugs_decentralized	shields/general_shield	True	-10	False	GridWorld	MIT	FullObsDiscrete	Individual_Q	1.0	0.05	1000	0	True	IndivQLearningSlugs1k/160_16_0_slugs_decentralized	slugs_decentralized	shields/general_shield	0.05
IndivQLearningSlugs1k/160_16_0	slugs_decentralized	shields/general_shield	True	-10	False	GridWorld	MIT	FullObsDiscrete	Individual_Q	1.0	0.05	1000	0	True	IndivQLearningSlugs1k/160_16_0_none	none		0.05
IndivQLearningSlugs1k/161_16_1	slugs_decentralized	shields/general_shield	True	-10	False	GridWorld	MIT	FullObsDiscrete	Individual_Q	1.0	0.05	1000	1	True	IndivQLearningSlugs1k/161_16_1_slugs_centralized	slugs_centralized	shields/general_shield	0.05
IndivQLearningSlugs1k/161_16_1	slugs_decentralized	shields/general_shield	True	-10	False	GridWorld	MIT	FullObsDiscrete	Individual_Q	1.0	0.05	1000	1	True	IndivQLearningSlugs1k/161_16_1_slugs_decentralized	slugs_decentralized	shields/general_shield	0.05
IndivQLearningSlugs1k/161_16_1	slugs_decentralized	shields/general_shield	True	-10	False	GridWorld	MIT	FullObsDiscrete	Individual_Q	1.0	0.05	1000	1	True	IndivQLearningSlugs1k/161_16_1_none	none		0.05
IndivQLearningSlugs1k/162_16_2	slugs_decentralized	shields/general_shield	True	-10	False	GridWorld	MIT	FullObsDiscrete	Individual_Q	1.0	0.05	1000	2	True	IndivQLearningSlugs1k/162_16_2_slugs_centralized	slugs_centralized	shields/general_shield	0.05
IndivQLearningSlugs1k/162_16_2	slugs_decentralized	shields/general_shield	True	-10	False	GridWorld	MIT	FullObsDiscrete	Individual_Q	1.0	0.05	1000	2	True	IndivQLearningSlugs1k/162_16_2_slugs_decentralized	slugs_decentralized	shields/general_shield	0.05
IndivQLearningSlugs1k/162_16_2	slugs_decentralized	shields/general_shield	True	-10	False	GridWorld	MIT	FullObsDiscrete	Individual_Q	1.0	0.05	1000	2	True	IndivQLearningSlugs1k/162_16_2_none	none		0.05
IndivQLearningSlugs1k/163_16_3	slugs_decentralized	shields/general_shield	True	-10	False	GridWorld	MIT	FullObsDiscrete	Individual_Q	1.0	0.05	1000	3	True	IndivQLearningSlugs1k/163_16_3_slugs_centralized	slugs_centralized	shields/general_shield	0.05
IndivQLearningSlugs1k/163_16_3	slugs_decentralized	shields/general_shield	True	-10	False	GridWorld	MIT	FullObsDiscrete	Individual_Q	1.0	0.05	1000	3	True	IndivQLearningSlugs1k/163_16_3_slugs_decentralized	slugs_decentralized	shields/general_shield	0.05
IndivQLearningSlugs1k/163_16_3	slugs_decentralized	shields/general_shield	True	-10	False	GridWorld	MIT	FullObsDiscrete	Individual_Q	1.0	0.05	1000	3	True	IndivQLearningSlugs1k/163_16_3_none	none		0.05
IndivQLearningSlugs1k/164_16_4	slugs_decentralized	shields/general_shield	True	-10	False	GridWorld	MIT	FullObsDiscrete	Individual_Q	1.0	0.05	1000	4	True	IndivQLearningSlugs1k/164_16_4_slugs_centralized	slugs_centralized	shields/general_shield	0.05
IndivQLearningSlugs1k/164_16_4	slugs_decentralized	shields/general_shield	True	-10	False	GridWorld	MIT	FullObsDiscrete	Individual_Q	1.0	0.05	1000	4	True	IndivQLearningSlugs1k/164_16_4_slugs_decentralized	slugs_decentralized	shields/general_shield	0.05
IndivQLearningSlugs1k/164_16_4	slugs_decentralized	shields/general_shield	True	-10	False	GridWorld	MIT	FullObsDiscrete	Individual_Q	1.0	0.05	1000	4	True	IndivQLearningSlugs1k/164_16_4_none	none		0.05
IndivQLearningSlugs1k/165_16_5	slugs_decentralized	shields/general_shield	True	-10	False	GridWorld	MIT	FullObsDiscrete	Individual_Q	1.0	0.05	1000	5	True	IndivQLearningSlugs1k/165_16_5_slugs_centralized	slugs_centralized	shields/general_shield	0.05
IndivQLearningSlugs1k/165_16_5	slugs_decentralized	shields/general_shield	True	-10	False	GridWorld	MIT	FullObsDiscrete	Individual_Q	1.0	0.05	1000	5	True	IndivQLearningSlugs1k/165_16_5_slugs_decentralized	slugs_decentralized	shields/general_shield	0.05
IndivQLearningSlugs1k/165_16_5	slugs_decentralized	shields/general_shield	True	-10	False	GridWorld	MIT	FullObsDiscrete	Individual_Q	1.0	0.05	1000	5	True	IndivQLearningSlugs1k/165_16_5_none	none		0.05
IndivQLearningSlugs1k/166_16_6	slugs_decentralized	shields/general_shield	True	-10	False	GridWorld	MIT	FullObsDiscrete	Individual_Q	1.0	0.05	1000	6	True	IndivQLearningSlugs1k/166_16_6_slugs_centralized	slugs_centralized	shields/general_shield	0.05
IndivQLearningSlugs1k/166_16_6	slugs_decentralized	shields/general_shield	True	-10	False	GridWorld	MIT	FullObsDiscrete	Individual_Q	1.0	0.05	1000	6	True	IndivQLearningSlugs1k/166_16_6_slugs_decentralized	slugs_decentralized	shields/general_shield	0.05
IndivQLearningSlugs1k/166_16_6	slugs_decentralized	shields/general_shield	True	-10	False	GridWorld	MIT	FullObsDiscrete	Individual_Q	1.0	0.05	1000	6	True	IndivQLearningSlugs1k/166_16_6_none	none		0.05
IndivQLearningSlugs1k/167_16_7	slugs_decentralized	shields/general_shield	True	-10	False	GridWorld	MIT	FullObsDiscrete	Individual_Q	1.0	0.05	1000	7	True	IndivQLearningSlugs1k/167_16_7_slugs_centralized	slugs_centralized	shields/general_shield	0.05
IndivQLearningSlugs1k/167_16_7	slugs_decentralized	shields/general_shield	True	-10	False	GridWorld	MIT	FullObsDiscrete	Individual_Q	1.0	0.05	1000	7	True	IndivQLearningSlugs1k/167_16_7_slugs_decentralized	slugs_decentralized	shields/general_shield	0.05
IndivQLearningSlugs1k/167_16_7	slugs_decentralized	shields/general_shield	True	-10	False	GridWorld	MIT	FullObsDiscrete	Individual_Q	1.0	0.05	1000	7	True	IndivQLearningSlugs1k/167_16_7_none	none		0.05
IndivQLearningSlugs1k/168_16_8	slugs_decentralized	shields/general_shield	True	-10	False	GridWorld	MIT	FullObsDiscrete	Individual_Q	1.0	0.05	1000	8	True	IndivQLearningSlugs1k/168_16_8_slugs_centralized	slugs_centralized	shields/general_shield	0.05
IndivQLearningSlugs1k/168_16_8	slugs_decentralized	shields/general_shield	True	-10	False	GridWorld	MIT	FullObsDiscrete	Individual_Q	1.0	0.05	1000	8	True	IndivQLearningSlugs1k/168_16_8_slugs_decentralized	slugs_decentralized	shields/general_shield	0.05
IndivQLearningSlugs1k/168_16_8	slugs_decentralized	shields/general_shield	True	-10	False	GridWorld	MIT	FullObsDiscrete	Individual_Q	1.0	0.05	1000	8	True	IndivQLearningSlugs1k/168_16_8_none	none		0.05
IndivQLearningSlugs1k/169_16_9	slugs_decentralized	shields/general_shield	True	-10	False	GridWorld	MIT	FullObsDiscrete	Individual_Q	1.0	0.05	1000	9	True	IndivQLearningSlugs1k/169_16_9_slugs_centralized	slugs_centralized	shields/general_shield	0.05
IndivQLearningSlugs1k/169_16_9	slugs_decentralized	shields/general_shield	True	-10	False	GridWorld	MIT	FullObsDiscrete	Individual_Q	1.0	0.05	1000	9	True	IndivQLearningSlugs1k/169_16_9_slugs_decentralized	slugs_decentralized	shields/general_shield	0.05
IndivQLearningSlugs1k/169_16_9	slugs_decentralized	shields/general_shield	True	-10	False	GridWorld	MIT	FullObsDiscrete	Individual_Q	1.0	0.05	1000	9	True	IndivQLearningSlugs1k/169_16_9_none	none		0.05
IndivQLearningSlugs1k/170_17_0	none		True	-10	False	GridWorld	MIT	FullObsDiscrete	Individual_Q	1.0	0.05	1000	0	True	IndivQLearningSlugs1k/170_17_0_slugs_centralized	slugs_centralized	shields/general_shield	0.05
IndivQLearningSlugs1k/170_17_0	none		True	-10	False	GridWorld	MIT	FullObsDiscrete	Individual_Q	1.0	0.05	1000	0	True	IndivQLearningSlugs1k/170_17_0_slugs_decentralized	slugs_decentralized	shields/general_shield	0.05
IndivQLearningSlugs1k/170_17_0	none		True	-10	False	GridWorld	MIT	FullObsDiscrete	Individual_Q	1.0	0.05	1000	0	True	IndivQLearningSlugs1k/170_17_0_none	none		0.05
IndivQLearningSlugs1k/171_17_1	none		True	-10	False	GridWorld	MIT	FullObsDiscrete	Individual_Q	1.0	0.05	1000	1	True	IndivQLearningSlugs1k/171_17_1_slugs_centralized	slugs_centralized	shields/general_shield	0.05
IndivQLearningSlugs1k/171_17_1	none		True	-10	False	GridWorld	MIT	FullObsDiscrete	Individual_Q	1.0	0.05	1000	1	True	IndivQLearningSlugs1k/171_17_1_slugs_decentralized	slugs_decentralized	shields/general_shield	0.05
IndivQLearningSlugs1k/171_17_1	none		True	-10	False	GridWorld	MIT	FullObsDiscrete	Individual_Q	1.0	0.05	1000	1	True	IndivQLearningSlugs1k/171_17_1_none	none		0.05
IndivQLearningSlugs1k/172_17_2	none		True	-10	False	GridWorld	MIT	FullObsDiscrete	Individual_Q	1.0	0.05	1000	2	True	IndivQLearningSlugs1k/172_17_2_slugs_centralized	slugs_centralized	shields/general_shield	0.05
IndivQLearningSlugs1k/172_17_2	none		True	-10	False	GridWorld	MIT	FullObsDiscrete	Individual_Q	1.0	0.05	1000	2	True	IndivQLearningSlugs1k/172_17_2_slugs_decentralized	slugs_decentralized	shields/general_shield	0.05
IndivQLearningSlugs1k/172_17_2	none		True	-10	False	GridWorld	MIT	FullObsDiscrete	Individual_Q	1.0	0.05	1000	2	True	IndivQLearningSlugs1k/172_17_2_none	none		0.05
IndivQLearningSlugs1k/173_17_3	none		True	-10	False	GridWorld	MIT	FullObsDiscrete	Individual_Q	1.0	0.05	1000	3	True	IndivQLearningSlugs1k/173_17_3_slugs_centralized	slugs_centralized	shields/general_shield	0.05
IndivQLearningSlugs1k/173_17_3	none		True	-10	False	GridWorld	MIT	FullObsDiscrete	Individual_Q	1.0	0.05	1000	3	True	IndivQLearningSlugs1k/173_17_3_slugs_decentralized	slugs_decentralized	shields/general_shield	0.05
IndivQLearningSlugs1k/173_17_3	none		True	-10	False	GridWorld	MIT	FullObsDiscrete	Individual_Q	1.0	0.05	1000	3	True	IndivQLearningSlugs1k/173_17_3_none	none		0.05
IndivQLearningSlugs1k/174_17_4	none		True	-10	False	GridWorld	MIT	FullObsDiscrete	Individual_Q	1.0	0.05	1000	4	True	IndivQLearningSlugs1k/174_17_4_slugs_centralized	slugs_centralized	shields/general_shield	0.05
IndivQLearningSlugs1k/174_17_4	none		True	-10	False	GridWorld	MIT	FullObsDiscrete	Individual_Q	1.0	0.05	1000	4	True	IndivQLearningSlugs1k/174_17_4_slugs_decentralized	slugs_decentralized	shields/general_shield	0.05
IndivQLearningSlugs1k/174_17_4	none		True	-10	False	GridWorld	MIT	FullObsDiscrete	Individual_Q	1.0	0.05	1000	4	True	IndivQLearningSlugs1k/174_17_4_none	none		0.05
IndivQLearningSlugs1k/175_17_5	none		True	-10	False	GridWorld	MIT	FullObsDiscrete	Individual_Q	1.0	0.05	1000	5	True	IndivQLearningSlugs1k/175_17_5_slugs_centralized	slugs_centralized	shields/general_shield	0.05
IndivQLearningSlugs1k/175_17_5	none		True	-10	False	GridWorld	MIT	FullObsDiscrete	Individual_Q	1.0	0.05	1000	5	True	IndivQLearningSlugs1k/175_17_5_slugs_decentralized	slugs_decentralized	shields/general_shield	0.05
IndivQLearningSlugs1k/175_17_5	none		True	-10	False	GridWorld	MIT	FullObsDiscrete	Individual_Q	1.0	0.05	1000	5	True	IndivQLearningSlugs1k/175_17_5_none	none		0.05
IndivQLearningSlugs1k/176_17_6	none		True	-10	False	GridWorld	MIT	FullObsDiscrete	Individual_Q	1.0	0.05	1000	6	True	IndivQLearningSlugs1k/176_17_6_slugs_centralized	slugs_centralized	shields/general_shield	0.05
IndivQLearningSlugs1k/176_17_6	none		True	-10	False	GridWorld	MIT	FullObsDiscrete	Individual_Q	1.0	0.05	1000	6	True	IndivQLearningSlugs1k/176_17_6_slugs_decentralized	slugs_decentralized	shields/general_shield	0.05
IndivQLearningSlugs1k/176_17_6	none		True	-10	False	GridWorld	MIT	FullObsDiscrete	Individual_Q	1.0	0.05	1000	6	True	IndivQLearningSlugs1k/176_17_6_none	none		0.05
IndivQLearningSlugs1k/177_17_7	none		True	-10	False	GridWorld	MIT	FullObsDiscrete	Individual_Q	1.0	0.05	1000	7	True	IndivQLearningSlugs1k/177_17_7_slugs_centralized	slugs_centralized	shields/general_shield	0.05
IndivQLearningSlugs1k/177_17_7	none		True	-10	False	GridWorld	MIT	FullObsDiscrete	Individual_Q	1.0	0.05	1000	7	True	IndivQLearningSlugs1k/177_17_7_slugs_decentralized	slugs_decentralized	shields/general_shield	0.05
IndivQLearningSlugs1k/177_17_7	none		True	-10	False	GridWorld	MIT	FullObsDiscrete	Individual_Q	1.0	0.05	1000	7	True	IndivQLearningSlugs1k/177_17_7_none	none		0.05
IndivQLearningSlugs1k/178_17_8	none		True	-10	False	GridWorld	MIT	FullObsDiscrete	Individual_Q	1.0	0.05	1000	8	True	IndivQLearningSlugs1k/178_17_8_slugs_centralized	slugs_centralized	shields/general_shield	0.05
IndivQLearningSlugs1k/178_17_8	none		True	-10	False	GridWorld	MIT	FullObsDiscrete	Individual_Q	1.0	0.05	1000	8	True	IndivQLearningSlugs1k/178_17_8_slugs_decentralized	slugs_decentralized	shields/general_shield	0.05
IndivQLearningSlugs1k/178_17_8	none		True	-10	False	GridWorld	MIT	FullObsDiscrete	Individual_Q	1.0	0.05	1000	8	True	IndivQLearningSlugs1k/178_17_8_none	none		0.05
IndivQLearningSlugs1k/179_17_9	none		True	-10	False	GridWorld	MIT	FullObsDiscrete	Individual_Q	1.0	0.05	1000	9	True	IndivQLearningSlugs1k/179_17_9_slugs_centralized	slugs_centralized	shields/general_shield	0.05
IndivQLearningSlugs1k/179_17_9	none		True	-10	False	GridWorld	MIT	FullObsDiscrete	Individual_Q	1.0	0.05	1000	9	True	IndivQLearningSlugs1k/179_17_9_slugs_decentralized	slugs_decentralized	shields/general_shield	0.05
IndivQLearningSlugs1k/179_17_9	none		True	-10	False	GridWorld	MIT	FullObsDiscrete	Individual_Q	1.0	0.05	1000	9	True	IndivQLearningSlugs1k/179_17_9_none	none		0.05
IndivQLearningSlugs1k/180_18_0	slugs_centralized	shields/general_shield	True	-10	True	GridWorld	SUNY	FullObsDiscrete	Individual_Q	1.0	0.05	1000	0	True	IndivQLearningSlugs1k/180_18_0_slugs_centralized	slugs_centralized	shields/general_shield	0.05
IndivQLearningSlugs1k/180_18_0	slugs_centralized	shields/general_shield	True	-10	True	GridWorld	SUNY	FullObsDiscrete	Individual_Q	1.0	0.05	1000	0	True	IndivQLearningSlugs1k/180_18_0_slugs_decentralized	slugs_decentralized	shields/general_shield	0.05
IndivQLearningSlugs1k/180_18_0	slugs_centralized	shields/general_shield	True	-10	True	GridWorld	SUNY	FullObsDiscrete	Individual_Q	1.0	0.05	1000	0	True	IndivQLearningSlugs1k/180_18_0_none	none		0.05
IndivQLearningSlugs1k/181_18_1	slugs_centralized	shields/general_shield	True	-10	True	GridWorld	SUNY	FullObsDiscrete	Individual_Q	1.0	0.05	1000	1	True	IndivQLearningSlugs1k/181_18_1_slugs_centralized	slugs_centralized	shields/general_shield	0.05
IndivQLearningSlugs1k/181_18_1	slugs_centralized	shields/general_shield	True	-10	True	GridWorld	SUNY	FullObsDiscrete	Individual_Q	1.0	0.05	1000	1	True	IndivQLearningSlugs1k/181_18_1_slugs_decentralized	slugs_decentralized	shields/general_shield	0.05
IndivQLearningSlugs1k/181_18_1	slugs_centralized	shields/general_shield	True	-10	True	GridWorld	SUNY	FullObsDiscrete	Individual_Q	1.0	0.05	1000	1	True	IndivQLearningSlugs1k/181_18_1_none	none		0.05
IndivQLearningSlugs1k/182_18_2	slugs_centralized	shields/general_shield	True	-10	True	GridWorld	SUNY	FullObsDiscrete	Individual_Q	1.0	0.05	1000	2	True	IndivQLearningSlugs1k/182_18_2_slugs_centralized	slugs_centralized	shields/general_shield	0.05
IndivQLearningSlugs1k/182_18_2	slugs_centralized	shields/general_shield	True	-10	True	GridWorld	SUNY	FullObsDiscrete	Individual_Q	1.0	0.05	1000	2	True	IndivQLearningSlugs1k/182_18_2_slugs_decentralized	slugs_decentralized	shields/general_shield	0.05
IndivQLearningSlugs1k/182_18_2	slugs_centralized	shields/general_shield	True	-10	True	GridWorld	SUNY	FullObsDiscrete	Individual_Q	1.0	0.05	1000	2	True	IndivQLearningSlugs1k/182_18_2_none	none		0.05
IndivQLearningSlugs1k/183_18_3	slugs_centralized	shields/general_shield	True	-10	True	GridWorld	SUNY	FullObsDiscrete	Individual_Q	1.0	0.05	1000	3	True	IndivQLearningSlugs1k/183_18_3_slugs_centralized	slugs_centralized	shields/general_shield	0.05
IndivQLearningSlugs1k/183_18_3	slugs_centralized	shields/general_shield	True	-10	True	GridWorld	SUNY	FullObsDiscrete	Individual_Q	1.0	0.05	1000	3	True	IndivQLearningSlugs1k/183_18_3_slugs_decentralized	slugs_decentralized	shields/general_shield	0.05
IndivQLearningSlugs1k/183_18_3	slugs_centralized	shields/general_shield	True	-10	True	GridWorld	SUNY	FullObsDiscrete	Individual_Q	1.0	0.05	1000	3	True	IndivQLearningSlugs1k/183_18_3_none	none		0.05
IndivQLearningSlugs1k/184_18_4	slugs_centralized	shields/general_shield	True	-10	True	GridWorld	SUNY	FullObsDiscrete	Individual_Q	1.0	0.05	1000	4	True	IndivQLearningSlugs1k/184_18_4_slugs_centralized	slugs_centralized	shields/general_shield	0.05
IndivQLearningSlugs1k/184_18_4	slugs_centralized	shields/general_shield	True	-10	True	GridWorld	SUNY	FullObsDiscrete	Individual_Q	1.0	0.05	1000	4	True	IndivQLearningSlugs1k/184_18_4_slugs_decentralized	slugs_decentralized	shields/general_shield	0.05
IndivQLearningSlugs1k/184_18_4	slugs_centralized	shields/general_shield	True	-10	True	GridWorld	SUNY	FullObsDiscrete	Individual_Q	1.0	0.05	1000	4	True	IndivQLearningSlugs1k/184_18_4_none	none		0.05
IndivQLearningSlugs1k/185_18_5	slugs_centralized	shields/general_shield	True	-10	True	GridWorld	SUNY	FullObsDiscrete	Individual_Q	1.0	0.05	1000	5	True	IndivQLearningSlugs1k/185_18_5_slugs_centralized	slugs_centralized	shields/general_shield	0.05
IndivQLearningSlugs1k/185_18_5	slugs_centralized	shields/general_shield	True	-10	True	GridWorld	SUNY	FullObsDiscrete	Individual_Q	1.0	0.05	1000	5	True	IndivQLearningSlugs1k/185_18_5_slugs_decentralized	slugs_decentralized	shields/general_shield	0.05
IndivQLearningSlugs1k/185_18_5	slugs_centralized	shields/general_shield	True	-10	True	GridWorld	SUNY	FullObsDiscrete	Individual_Q	1.0	0.05	1000	5	True	IndivQLearningSlugs1k/185_18_5_none	none		0.05
IndivQLearningSlugs1k/186_18_6	slugs_centralized	shields/general_shield	True	-10	True	GridWorld	SUNY	FullObsDiscrete	Individual_Q	1.0	0.05	1000	6	True	IndivQLearningSlugs1k/186_18_6_slugs_centralized	slugs_centralized	shields/general_shield	0.05
IndivQLearningSlugs1k/186_18_6	slugs_centralized	shields/general_shield	True	-10	True	GridWorld	SUNY	FullObsDiscrete	Individual_Q	1.0	0.05	1000	6	True	IndivQLearningSlugs1k/186_18_6_slugs_decentralized	slugs_decentralized	shields/general_shield	0.05
IndivQLearningSlugs1k/186_18_6	slugs_centralized	shields/general_shield	True	-10	True	GridWorld	SUNY	FullObsDiscrete	Individual_Q	1.0	0.05	1000	6	True	IndivQLearningSlugs1k/186_18_6_none	none		0.05
IndivQLearningSlugs1k/187_18_7	slugs_centralized	shields/general_shield	True	-10	True	GridWorld	SUNY	FullObsDiscrete	Individual_Q	1.0	0.05	1000	7	True	IndivQLearningSlugs1k/187_18_7_slugs_centralized	slugs_centralized	shields/general_shield	0.05
IndivQLearningSlugs1k/187_18_7	slugs_centralized	shields/general_shield	True	-10	True	GridWorld	SUNY	FullObsDiscrete	Individual_Q	1.0	0.05	1000	7	True	IndivQLearningSlugs1k/187_18_7_slugs_decentralized	slugs_decentralized	shields/general_shield	0.05
IndivQLearningSlugs1k/187_18_7	slugs_centralized	shields/general_shield	True	-10	True	GridWorld	SUNY	FullObsDiscrete	Individual_Q	1.0	0.05	1000	7	True	IndivQLearningSlugs1k/187_18_7_none	none		0.05
IndivQLearningSlugs1k/188_18_8	slugs_centralized	shields/general_shield	True	-10	True	GridWorld	SUNY	FullObsDiscrete	Individual_Q	1.0	0.05	1000	8	True	IndivQLearningSlugs1k/188_18_8_slugs_centralized	slugs_centralized	shields/general_shield	0.05
IndivQLearningSlugs1k/188_18_8	slugs_centralized	shields/general_shield	True	-10	True	GridWorld	SUNY	FullObsDiscrete	Individual_Q	1.0	0.05	1000	8	True	IndivQLearningSlugs1k/188_18_8_slugs_decentralized	slugs_decentralized	shields/general_shield	0.05
IndivQLearningSlugs1k/188_18_8	slugs_centralized	shields/general_shield	True	-10	True	GridWorld	SUNY	FullObsDiscrete	Individual_Q	1.0	0.05	1000	8	True	IndivQLearningSlugs1k/188_18_8_none	none		0.05
IndivQLearningSlugs1k/189_18_9	slugs_centralized	shields/general_shield	True	-10	True	GridWorld	SUNY	FullObsDiscrete	Individual_Q	1.0	0.05	1000	9	True	IndivQLearningSlugs1k/189_18_9_slugs_centralized	slugs_centralized	shields/general_shield	0.05
IndivQLearningSlugs1k/189_18_9	slugs_centralized	shields/general_shield	True	-10	True	GridWorld	SUNY	FullObsDiscrete	Individual_Q	1.0	0.05	1000	9	True	IndivQLearningSlugs1k/189_18_9_slugs_decentralized	slugs_decentralized	shields/general_shield	0.05
IndivQLearningSlugs1k/189_18_9	slugs_centralized	shields/general_shield	True	-10	True	GridWorld	SUNY	FullObsDiscrete	Individual_Q	1.0	0.05	1000	9	True	IndivQLearningSlugs1k/189_18_9_none	none		0.05
IndivQLearningSlugs1k/190_19_0	slugs_decentralized	shields/general_shield	True	-10	True	GridWorld	SUNY	FullObsDiscrete	Individual_Q	1.0	0.05	1000	0	True	IndivQLearningSlugs1k/190_19_0_slugs_centralized	slugs_centralized	shields/general_shield	0.05
IndivQLearningSlugs1k/190_19_0	slugs_decentralized	shields/general_shield	True	-10	True	GridWorld	SUNY	FullObsDiscrete	Individual_Q	1.0	0.05	1000	0	True	IndivQLearningSlugs1k/190_19_0_slugs_decentralized	slugs_decentralized	shields/general_shield	0.05
IndivQLearningSlugs1k/190_19_0	slugs_decentralized	shields/general_shield	True	-10	True	GridWorld	SUNY	FullObsDiscrete	Individual_Q	1.0	0.05	1000	0	True	IndivQLearningSlugs1k/190_19_0_none	none		0.05
IndivQLearningSlugs1k/191_19_1	slugs_decentralized	shields/general_shield	True	-10	True	GridWorld	SUNY	FullObsDiscrete	Individual_Q	1.0	0.05	1000	1	True	IndivQLearningSlugs1k/191_19_1_slugs_centralized	slugs_centralized	shields/general_shield	0.05
IndivQLearningSlugs1k/191_19_1	slugs_decentralized	shields/general_shield	True	-10	True	GridWorld	SUNY	FullObsDiscrete	Individual_Q	1.0	0.05	1000	1	True	IndivQLearningSlugs1k/191_19_1_slugs_decentralized	slugs_decentralized	shields/general_shield	0.05
IndivQLearningSlugs1k/191_19_1	slugs_decentralized	shields/general_shield	True	-10	True	GridWorld	SUNY	FullObsDiscrete	Individual_Q	1.0	0.05	1000	1	True	IndivQLearningSlugs1k/191_19_1_none	none		0.05
IndivQLearningSlugs1k/192_19_2	slugs_decentralized	shields/general_shield	True	-10	True	GridWorld	SUNY	FullObsDiscrete	Individual_Q	1.0	0.05	1000	2	True	IndivQLearningSlugs1k/192_19_2_slugs_centralized	slugs_centralized	shields/general_shield	0.05
IndivQLearningSlugs1k/192_19_2	slugs_decentralized	shields/general_shield	True	-10	True	GridWorld	SUNY	FullObsDiscrete	Individual_Q	1.0	0.05	1000	2	True	IndivQLearningSlugs1k/192_19_2_slugs_decentralized	slugs_decentralized	shields/general_shield	0.05
IndivQLearningSlugs1k/192_19_2	slugs_decentralized	shields/general_shield	True	-10	True	GridWorld	SUNY	FullObsDiscrete	Individual_Q	1.0	0.05	1000	2	True	IndivQLearningSlugs1k/192_19_2_none	none		0.05
IndivQLearningSlugs1k/193_19_3	slugs_decentralized	shields/general_shield	True	-10	True	GridWorld	SUNY	FullObsDiscrete	Individual_Q	1.0	0.05	1000	3	True	IndivQLearningSlugs1k/193_19_3_slugs_centralized	slugs_centralized	shields/general_shield	0.05
IndivQLearningSlugs1k/193_19_3	slugs_decentralized	shields/general_shield	True	-10	True	GridWorld	SUNY	FullObsDiscrete	Individual_Q	1.0	0.05	1000	3	True	IndivQLearningSlugs1k/193_19_3_slugs_decentralized	slugs_decentralized	shields/general_shield	0.05
IndivQLearningSlugs1k/193_19_3	slugs_decentralized	shields/general_shield	True	-10	True	GridWorld	SUNY	FullObsDiscrete	Individual_Q	1.0	0.05	1000	3	True	IndivQLearningSlugs1k/193_19_3_none	none		0.05
IndivQLearningSlugs1k/194_19_4	slugs_decentralized	shields/general_shield	True	-10	True	GridWorld	SUNY	FullObsDiscrete	Individual_Q	1.0	0.05	1000	4	True	IndivQLearningSlugs1k/194_19_4_slugs_centralized	slugs_centralized	shields/general_shield	0.05
IndivQLearningSlugs1k/194_19_4	slugs_decentralized	shields/general_shield	True	-10	True	GridWorld	SUNY	FullObsDiscrete	Individual_Q	1.0	0.05	1000	4	True	IndivQLearningSlugs1k/194_19_4_slugs_decentralized	slugs_decentralized	shields/general_shield	0.05
IndivQLearningSlugs1k/194_19_4	slugs_decentralized	shields/general_shield	True	-10	True	GridWorld	SUNY	FullObsDiscrete	Individual_Q	1.0	0.05	1000	4	True	IndivQLearningSlugs1k/194_19_4_none	none		0.05
IndivQLearningSlugs1k/195_19_5	slugs_decentralized	shields/general_shield	True	-10	True	GridWorld	SUNY	FullObsDiscrete	Individual_Q	1.0	0.05	1000	5	True	IndivQLearningSlugs1k/195_19_5_slugs_centralized	slugs_centralized	shields/general_shield	0.05
IndivQLearningSlugs1k/195_19_5	slugs_decentralized	shields/general_shield	True	-10	True	GridWorld	SUNY	FullObsDiscrete	Individual_Q	1.0	0.05	1000	5	True	IndivQLearningSlugs1k/195_19_5_slugs_decentralized	slugs_decentralized	shields/general_shield	0.05
IndivQLearningSlugs1k/195_19_5	slugs_decentralized	shields/general_shield	True	-10	True	GridWorld	SUNY	FullObsDiscrete	Individual_Q	1.0	0.05	1000	5	True	IndivQLearningSlugs1k/195_19_5_none	none		0.05
IndivQLearningSlugs1k/196_19_6	slugs_decentralized	shields/general_shield	True	-10	True	GridWorld	SUNY	FullObsDiscrete	Individual_Q	1.0	0.05	1000	6	True	IndivQLearningSlugs1k/196_19_6_slugs_centralized	slugs_centralized	shields/general_shield	0.05
IndivQLearningSlugs1k/196_19_6	slugs_decentralized	shields/general_shield	True	-10	True	GridWorld	SUNY	FullObsDiscrete	Individual_Q	1.0	0.05	1000	6	True	IndivQLearningSlugs1k/196_19_6_slugs_decentralized	slugs_decentralized	shields/general_shield	0.05
IndivQLearningSlugs1k/196_19_6	slugs_decentralized	shields/general_shield	True	-10	True	GridWorld	SUNY	FullObsDiscrete	Individual_Q	1.0	0.05	1000	6	True	IndivQLearningSlugs1k/196_19_6_none	none		0.05
IndivQLearningSlugs1k/197_19_7	slugs_decentralized	shields/general_shield	True	-10	True	GridWorld	SUNY	FullObsDiscrete	Individual_Q	1.0	0.05	1000	7	True	IndivQLearningSlugs1k/197_19_7_slugs_centralized	slugs_centralized	shields/general_shield	0.05
IndivQLearningSlugs1k/197_19_7	slugs_decentralized	shields/general_shield	True	-10	True	GridWorld	SUNY	FullObsDiscrete	Individual_Q	1.0	0.05	1000	7	True	IndivQLearningSlugs1k/197_19_7_slugs_decentralized	slugs_decentralized	shields/general_shield	0.05
IndivQLearningSlugs1k/197_19_7	slugs_decentralized	shields/general_shield	True	-10	True	GridWorld	SUNY	FullObsDiscrete	Individual_Q	1.0	0.05	1000	7	True	IndivQLearningSlugs1k/197_19_7_none	none		0.05
IndivQLearningSlugs1k/198_19_8	slugs_decentralized	shields/general_shield	True	-10	True	GridWorld	SUNY	FullObsDiscrete	Individual_Q	1.0	0.05	1000	8	True	IndivQLearningSlugs1k/198_19_8_slugs_centralized	slugs_centralized	shields/general_shield	0.05
IndivQLearningSlugs1k/198_19_8	slugs_decentralized	shields/general_shield	True	-10	True	GridWorld	SUNY	FullObsDiscrete	Individual_Q	1.0	0.05	1000	8	True	IndivQLearningSlugs1k/198_19_8_slugs_decentralized	slugs_decentralized	shields/general_shield	0.05
IndivQLearningSlugs1k/198_19_8	slugs_decentralized	shields/general_shield	True	-10	True	GridWorld	SUNY	FullObsDiscrete	Individual_Q	1.0	0.05	1000	8	True	IndivQLearningSlugs1k/198_19_8_none	none		0.05
IndivQLearningSlugs1k/199_19_9	slugs_decentralized	shields/general_shield	True	-10	True	GridWorld	SUNY	FullObsDiscrete	Individual_Q	1.0	0.05	1000	9	True	IndivQLearningSlugs1k/199_19_9_slugs_centralized	slugs_centralized	shields/general_shield	0.05
IndivQLearningSlugs1k/199_19_9	slugs_decentralized	shields/general_shield	True	-10	True	GridWorld	SUNY	FullObsDiscrete	Individual_Q	1.0	0.05	1000	9	True	IndivQLearningSlugs1k/199_19_9_slugs_decentralized	slugs_decentralized	shields/general_shield	0.05
IndivQLearningSlugs1k/199_19_9	slugs_decentralized	shields/general_shield	True	-10	True	GridWorld	SUNY	FullObsDiscrete	Individual_Q	1.0	0.05	1000	9	True	IndivQLearningSlugs1k/199_19_9_none	none		0.05
IndivQLearningSlugs1k/200_20_0	none		True	-10	True	GridWorld	SUNY	FullObsDiscrete	Individual_Q	1.0	0.05	1000	0	True	IndivQLearningSlugs1k/200_20_0_slugs_centralized	slugs_centralized	shields/general_shield	0.05
IndivQLearningSlugs1k/200_20_0	none		True	-10	True	GridWorld	SUNY	FullObsDiscrete	Individual_Q	1.0	0.05	1000	0	True	IndivQLearningSlugs1k/200_20_0_slugs_decentralized	slugs_decentralized	shields/general_shield	0.05
IndivQLearningSlugs1k/200_20_0	none		True	-10	True	GridWorld	SUNY	FullObsDiscrete	Individual_Q	1.0	0.05	1000	0	True	IndivQLearningSlugs1k/200_20_0_none	none		0.05
IndivQLearningSlugs1k/201_20_1	none		True	-10	True	GridWorld	SUNY	FullObsDiscrete	Individual_Q	1.0	0.05	1000	1	True	IndivQLearningSlugs1k/201_20_1_slugs_centralized	slugs_centralized	shields/general_shield	0.05
IndivQLearningSlugs1k/201_20_1	none		True	-10	True	GridWorld	SUNY	FullObsDiscrete	Individual_Q	1.0	0.05	1000	1	True	IndivQLearningSlugs1k/201_20_1_slugs_decentralized	slugs_decentralized	shields/general_shield	0.05
IndivQLearningSlugs1k/201_20_1	none		True	-10	True	GridWorld	SUNY	FullObsDiscrete	Individual_Q	1.0	0.05	1000	1	True	IndivQLearningSlugs1k/201_20_1_none	none		0.05
IndivQLearningSlugs1k/202_20_2	none		True	-10	True	GridWorld	SUNY	FullObsDiscrete	Individual_Q	1.0	0.05	1000	2	True	IndivQLearningSlugs1k/202_20_2_slugs_centralized	slugs_centralized	shields/general_shield	0.05
IndivQLearningSlugs1k/202_20_2	none		True	-10	True	GridWorld	SUNY	FullObsDiscrete	Individual_Q	1.0	0.05	1000	2	True	IndivQLearningSlugs1k/202_20_2_slugs_decentralized	slugs_decentralized	shields/general_shield	0.05
IndivQLearningSlugs1k/202_20_2	none		True	-10	True	GridWorld	SUNY	FullObsDiscrete	Individual_Q	1.0	0.05	1000	2	True	IndivQLearningSlugs1k/202_20_2_none	none		0.05
IndivQLearningSlugs1k/203_20_3	none		True	-10	True	GridWorld	SUNY	FullObsDiscrete	Individual_Q	1.0	0.05	1000	3	True	IndivQLearningSlugs1k/203_20_3_slugs_centralized	slugs_centralized	shields/general_shield	0.05
IndivQLearningSlugs1k/203_20_3	none		True	-10	True	GridWorld	SUNY	FullObsDiscrete	Individual_Q	1.0	0.05	1000	3	True	IndivQLearningSlugs1k/203_20_3_slugs_decentralized	slugs_decentralized	shields/general_shield	0.05
IndivQLearningSlugs1k/203_20_3	none		True	-10	True	GridWorld	SUNY	FullObsDiscrete	Individual_Q	1.0	0.05	1000	3	True	IndivQLearningSlugs1k/203_20_3_none	none		0.05
IndivQLearningSlugs1k/204_20_4	none		True	-10	True	GridWorld	SUNY	FullObsDiscrete	Individual_Q	1.0	0.05	1000	4	True	IndivQLearningSlugs1k/204_20_4_slugs_centralized	slugs_centralized	shields/general_shield	0.05
IndivQLearningSlugs1k/204_20_4	none		True	-10	True	GridWorld	SUNY	FullObsDiscrete	Individual_Q	1.0	0.05	1000	4	True	IndivQLearningSlugs1k/204_20_4_slugs_decentralized	slugs_decentralized	shields/general_shield	0.05
IndivQLearningSlugs1k/204_20_4	none		True	-10	True	GridWorld	SUNY	FullObsDiscrete	Individual_Q	1.0	0.05	1000	4	True	IndivQLearningSlugs1k/204_20_4_none	none		0.05
IndivQLearningSlugs1k/205_20_5	none		True	-10	True	GridWorld	SUNY	FullObsDiscrete	Individual_Q	1.0	0.05	1000	5	True	IndivQLearningSlugs1k/205_20_5_slugs_centralized	slugs_centralized	shields/general_shield	0.05
IndivQLearningSlugs1k/205_20_5	none		True	-10	True	GridWorld	SUNY	FullObsDiscrete	Individual_Q	1.0	0.05	1000	5	True	IndivQLearningSlugs1k/205_20_5_slugs_decentralized	slugs_decentralized	shields/general_shield	0.05
IndivQLearningSlugs1k/205_20_5	none		True	-10	True	GridWorld	SUNY	FullObsDiscrete	Individual_Q	1.0	0.05	1000	5	True	IndivQLearningSlugs1k/205_20_5_none	none		0.05
IndivQLearningSlugs1k/206_20_6	none		True	-10	True	GridWorld	SUNY	FullObsDiscrete	Individual_Q	1.0	0.05	1000	6	True	IndivQLearningSlugs1k/206_20_6_slugs_centralized	slugs_centralized	shields/general_shield	0.05
IndivQLearningSlugs1k/206_20_6	none		True	-10	True	GridWorld	SUNY	FullObsDiscrete	Individual_Q	1.0	0.05	1000	6	True	IndivQLearningSlugs1k/206_20_6_slugs_decentralized	slugs_decentralized	shields/general_shield	0.05
IndivQLearningSlugs1k/206_20_6	none		True	-10	True	GridWorld	SUNY	FullObsDiscrete	Individual_Q	1.0	0.05	1000	6	True	IndivQLearningSlugs1k/206_20_6_none	none		0.05
IndivQLearningSlugs1k/207_20_7	none		True	-10	True	GridWorld	SUNY	FullObsDiscrete	Individual_Q	1.0	0.05	1000	7	True	IndivQLearningSlugs1k/207_20_7_slugs_centralized	slugs_centralized	shields/general_shield	0.05
IndivQLearningSlugs1k/207_20_7	none		True	-10	True	GridWorld	SUNY	FullObsDiscrete	Individual_Q	1.0	0.05	1000	7	True	IndivQLearningSlugs1k/207_20_7_slugs_decentralized	slugs_decentralized	shields/general_shield	0.05
IndivQLearningSlugs1k/207_20_7	none		True	-10	True	GridWorld	SUNY	FullObsDiscrete	Individual_Q	1.0	0.05	1000	7	True	IndivQLearningSlugs1k/207_20_7_none	none		0.05
IndivQLearningSlugs1k/208_20_8	none		True	-10	True	GridWorld	SUNY	FullObsDiscrete	Individual_Q	1.0	0.05	1000	8	True	IndivQLearningSlugs1k/208_20_8_slugs_centralized	slugs_centralized	shields/general_shield	0.05
IndivQLearningSlugs1k/208_20_8	none		True	-10	True	GridWorld	SUNY	FullObsDiscrete	Individual_Q	1.0	0.05	1000	8	True	IndivQLearningSlugs1k/208_20_8_slugs_decentralized	slugs_decentralized	shields/general_shield	0.05
IndivQLearningSlugs1k/208_20_8	none		True	-10	True	GridWorld	SUNY	FullObsDiscrete	Individual_Q	1.0	0.05	1000	8	True	IndivQLearningSlugs1k/208_20_8_none	none		0.05
IndivQLearningSlugs1k/209_20_9	none		True	-10	True	GridWorld	SUNY	FullObsDiscrete	Individual_Q	1.0	0.05	1000	9	True	IndivQLearningSlugs1k/209_20_9_slugs_centralized	slugs_centralized	shields/general_shield	0.05
IndivQLearningSlugs1k/209_20_9	none		True	-10	True	GridWorld	SUNY	FullObsDiscrete	Individual_Q	1.0	0.05	1000	9	True	IndivQLearningSlugs1k/209_20_9_slugs_decentralized	slugs_decentralized	shields/general_shield	0.05
IndivQLearningSlugs1k/209_20_9	none		True	-10	True	GridWorld	SUNY	FullObsDiscrete	Individual_Q	1.0	0.05	1000	9	True	IndivQLearningSlugs1k/209_20_9_none	none		0.05
IndivQLearningSlugs1k/210_21_0	slugs_centralized	shields/general_shield	True	-10	False	GridWorld	SUNY	FullObsDiscrete	Individual_Q	1.0	0.05	1000	0	True	IndivQLearningSlugs1k/210_21_0_slugs_centralized	slugs_centralized	shields/general_shield	0.05
IndivQLearningSlugs1k/210_21_0	slugs_centralized	shields/general_shield	True	-10	False	GridWorld	SUNY	FullObsDiscrete	Individual_Q	1.0	0.05	1000	0	True	IndivQLearningSlugs1k/210_21_0_slugs_decentralized	slugs_decentralized	shields/general_shield	0.05
IndivQLearningSlugs1k/210_21_0	slugs_centralized	shields/general_shield	True	-10	False	GridWorld	SUNY	FullObsDiscrete	Individual_Q	1.0	0.05	1000	0	True	IndivQLearningSlugs1k/210_21_0_none	none		0.05
IndivQLearningSlugs1k/211_21_1	slugs_centralized	shields/general_shield	True	-10	False	GridWorld	SUNY	FullObsDiscrete	Individual_Q	1.0	0.05	1000	1	True	IndivQLearningSlugs1k/211_21_1_slugs_centralized	slugs_centralized	shields/general_shield	0.05
IndivQLearningSlugs1k/211_21_1	slugs_centralized	shields/general_shield	True	-10	False	GridWorld	SUNY	FullObsDiscrete	Individual_Q	1.0	0.05	1000	1	True	IndivQLearningSlugs1k/211_21_1_slugs_decentralized	slugs_decentralized	shields/general_shield	0.05
IndivQLearningSlugs1k/211_21_1	slugs_centralized	shields/general_shield	True	-10	False	GridWorld	SUNY	FullObsDiscrete	Individual_Q	1.0	0.05	1000	1	True	IndivQLearningSlugs1k/211_21_1_none	none		0.05
IndivQLearningSlugs1k/212_21_2	slugs_centralized	shields/general_shield	True	-10	False	GridWorld	SUNY	FullObsDiscrete	Individual_Q	1.0	0.05	1000	2	True	IndivQLearningSlugs1k/212_21_2_slugs_centralized	slugs_centralized	shields/general_shield	0.05
IndivQLearningSlugs1k/212_21_2	slugs_centralized	shields/general_shield	True	-10	False	GridWorld	SUNY	FullObsDiscrete	Individual_Q	1.0	0.05	1000	2	True	IndivQLearningSlugs1k/212_21_2_slugs_decentralized	slugs_decentralized	shields/general_shield	0.05
IndivQLearningSlugs1k/212_21_2	slugs_centralized	shields/general_shield	True	-10	False	GridWorld	SUNY	FullObsDiscrete	Individual_Q	1.0	0.05	1000	2	True	IndivQLearningSlugs1k/212_21_2_none	none		0.05
IndivQLearningSlugs1k/213_21_3	slugs_centralized	shields/general_shield	True	-10	False	GridWorld	SUNY	FullObsDiscrete	Individual_Q	1.0	0.05	1000	3	True	IndivQLearningSlugs1k/213_21_3_slugs_centralized	slugs_centralized	shields/general_shield	0.05
IndivQLearningSlugs1k/213_21_3	slugs_centralized	shields/general_shield	True	-10	False	GridWorld	SUNY	FullObsDiscrete	Individual_Q	1.0	0.05	1000	3	True	IndivQLearningSlugs1k/213_21_3_slugs_decentralized	slugs_decentralized	shields/general_shield	0.05
IndivQLearningSlugs1k/213_21_3	slugs_centralized	shields/general_shield	True	-10	False	GridWorld	SUNY	FullObsDiscrete	Individual_Q	1.0	0.05	1000	3	True	IndivQLearningSlugs1k/213_21_3_none	none		0.05
IndivQLearningSlugs1k/214_21_4	slugs_centralized	shields/general_shield	True	-10	False	GridWorld	SUNY	FullObsDiscrete	Individual_Q	1.0	0.05	1000	4	True	IndivQLearningSlugs1k/214_21_4_slugs_centralized	slugs_centralized	shields/general_shield	0.05
IndivQLearningSlugs1k/214_21_4	slugs_centralized	shields/general_shield	True	-10	False	GridWorld	SUNY	FullObsDiscrete	Individual_Q	1.0	0.05	1000	4	True	IndivQLearningSlugs1k/214_21_4_slugs_decentralized	slugs_decentralized	shields/general_shield	0.05
IndivQLearningSlugs1k/214_21_4	slugs_centralized	shields/general_shield	True	-10	False	GridWorld	SUNY	FullObsDiscrete	Individual_Q	1.0	0.05	1000	4	True	IndivQLearningSlugs1k/214_21_4_none	none		0.05
IndivQLearningSlugs1k/215_21_5	slugs_centralized	shields/general_shield	True	-10	False	GridWorld	SUNY	FullObsDiscrete	Individual_Q	1.0	0.05	1000	5	True	IndivQLearningSlugs1k/215_21_5_slugs_centralized	slugs_centralized	shields/general_shield	0.05
IndivQLearningSlugs1k/215_21_5	slugs_centralized	shields/general_shield	True	-10	False	GridWorld	SUNY	FullObsDiscrete	Individual_Q	1.0	0.05	1000	5	True	IndivQLearningSlugs1k/215_21_5_slugs_decentralized	slugs_decentralized	shields/general_shield	0.05
IndivQLearningSlugs1k/215_21_5	slugs_centralized	shields/general_shield	True	-10	False	GridWorld	SUNY	FullObsDiscrete	Individual_Q	1.0	0.05	1000	5	True	IndivQLearningSlugs1k/215_21_5_none	none		0.05
IndivQLearningSlugs1k/216_21_6	slugs_centralized	shields/general_shield	True	-10	False	GridWorld	SUNY	FullObsDiscrete	Individual_Q	1.0	0.05	1000	6	True	IndivQLearningSlugs1k/216_21_6_slugs_centralized	slugs_centralized	shields/general_shield	0.05
IndivQLearningSlugs1k/216_21_6	slugs_centralized	shields/general_shield	True	-10	False	GridWorld	SUNY	FullObsDiscrete	Individual_Q	1.0	0.05	1000	6	True	IndivQLearningSlugs1k/216_21_6_slugs_decentralized	slugs_decentralized	shields/general_shield	0.05
IndivQLearningSlugs1k/216_21_6	slugs_centralized	shields/general_shield	True	-10	False	GridWorld	SUNY	FullObsDiscrete	Individual_Q	1.0	0.05	1000	6	True	IndivQLearningSlugs1k/216_21_6_none	none		0.05
IndivQLearningSlugs1k/217_21_7	slugs_centralized	shields/general_shield	True	-10	False	GridWorld	SUNY	FullObsDiscrete	Individual_Q	1.0	0.05	1000	7	True	IndivQLearningSlugs1k/217_21_7_slugs_centralized	slugs_centralized	shields/general_shield	0.05
IndivQLearningSlugs1k/217_21_7	slugs_centralized	shields/general_shield	True	-10	False	GridWorld	SUNY	FullObsDiscrete	Individual_Q	1.0	0.05	1000	7	True	IndivQLearningSlugs1k/217_21_7_slugs_decentralized	slugs_decentralized	shields/general_shield	0.05
IndivQLearningSlugs1k/217_21_7	slugs_centralized	shields/general_shield	True	-10	False	GridWorld	SUNY	FullObsDiscrete	Individual_Q	1.0	0.05	1000	7	True	IndivQLearningSlugs1k/217_21_7_none	none		0.05
IndivQLearningSlugs1k/218_21_8	slugs_centralized	shields/general_shield	True	-10	False	GridWorld	SUNY	FullObsDiscrete	Individual_Q	1.0	0.05	1000	8	True	IndivQLearningSlugs1k/218_21_8_slugs_centralized	slugs_centralized	shields/general_shield	0.05
IndivQLearningSlugs1k/218_21_8	slugs_centralized	shields/general_shield	True	-10	False	GridWorld	SUNY	FullObsDiscrete	Individual_Q	1.0	0.05	1000	8	True	IndivQLearningSlugs1k/218_21_8_slugs_decentralized	slugs_decentralized	shields/general_shield	0.05
IndivQLearningSlugs1k/218_21_8	slugs_centralized	shields/general_shield	True	-10	False	GridWorld	SUNY	FullObsDiscrete	Individual_Q	1.0	0.05	1000	8	True	IndivQLearningSlugs1k/218_21_8_none	none		0.05
IndivQLearningSlugs1k/219_21_9	slugs_centralized	shields/general_shield	True	-10	False	GridWorld	SUNY	FullObsDiscrete	Individual_Q	1.0	0.05	1000	9	True	IndivQLearningSlugs1k/219_21_9_slugs_centralized	slugs_centralized	shields/general_shield	0.05
IndivQLearningSlugs1k/219_21_9	slugs_centralized	shields/general_shield	True	-10	False	GridWorld	SUNY	FullObsDiscrete	Individual_Q	1.0	0.05	1000	9	True	IndivQLearningSlugs1k/219_21_9_slugs_decentralized	slugs_decentralized	shields/general_shield	0.05
IndivQLearningSlugs1k/219_21_9	slugs_centralized	shields/general_shield	True	-10	False	GridWorld	SUNY	FullObsDiscrete	Individual_Q	1.0	0.05	1000	9	True	IndivQLearningSlugs1k/219_21_9_none	none		0.05
IndivQLearningSlugs1k/220_22_0	slugs_decentralized	shields/general_shield	True	-10	False	GridWorld	SUNY	FullObsDiscrete	Individual_Q	1.0	0.05	1000	0	True	IndivQLearningSlugs1k/220_22_0_slugs_centralized	slugs_centralized	shields/general_shield	0.05
IndivQLearningSlugs1k/220_22_0	slugs_decentralized	shields/general_shield	True	-10	False	GridWorld	SUNY	FullObsDiscrete	Individual_Q	1.0	0.05	1000	0	True	IndivQLearningSlugs1k/220_22_0_slugs_decentralized	slugs_decentralized	shields/general_shield	0.05
IndivQLearningSlugs1k/220_22_0	slugs_decentralized	shields/general_shield	True	-10	False	GridWorld	SUNY	FullObsDiscrete	Individual_Q	1.0	0.05	1000	0	True	IndivQLearningSlugs1k/220_22_0_none	none		0.05
IndivQLearningSlugs1k/221_22_1	slugs_decentralized	shields/general_shield	True	-10	False	GridWorld	SUNY	FullObsDiscrete	Individual_Q	1.0	0.05	1000	1	True	IndivQLearningSlugs1k/221_22_1_slugs_centralized	slugs_centralized	shields/general_shield	0.05
IndivQLearningSlugs1k/221_22_1	slugs_decentralized	shields/general_shield	True	-10	False	GridWorld	SUNY	FullObsDiscrete	Individual_Q	1.0	0.05	1000	1	True	IndivQLearningSlugs1k/221_22_1_slugs_decentralized	slugs_decentralized	shields/general_shield	0.05
IndivQLearningSlugs1k/221_22_1	slugs_decentralized	shields/general_shield	True	-10	False	GridWorld	SUNY	FullObsDiscrete	Individual_Q	1.0	0.05	1000	1	True	IndivQLearningSlugs1k/221_22_1_none	none		0.05
IndivQLearningSlugs1k/222_22_2	slugs_decentralized	shields/general_shield	True	-10	False	GridWorld	SUNY	FullObsDiscrete	Individual_Q	1.0	0.05	1000	2	True	IndivQLearningSlugs1k/222_22_2_slugs_centralized	slugs_centralized	shields/general_shield	0.05
IndivQLearningSlugs1k/222_22_2	slugs_decentralized	shields/general_shield	True	-10	False	GridWorld	SUNY	FullObsDiscrete	Individual_Q	1.0	0.05	1000	2	True	IndivQLearningSlugs1k/222_22_2_slugs_decentralized	slugs_decentralized	shields/general_shield	0.05
IndivQLearningSlugs1k/222_22_2	slugs_decentralized	shields/general_shield	True	-10	False	GridWorld	SUNY	FullObsDiscrete	Individual_Q	1.0	0.05	1000	2	True	IndivQLearningSlugs1k/222_22_2_none	none		0.05
IndivQLearningSlugs1k/223_22_3	slugs_decentralized	shields/general_shield	True	-10	False	GridWorld	SUNY	FullObsDiscrete	Individual_Q	1.0	0.05	1000	3	True	IndivQLearningSlugs1k/223_22_3_slugs_centralized	slugs_centralized	shields/general_shield	0.05
IndivQLearningSlugs1k/223_22_3	slugs_decentralized	shields/general_shield	True	-10	False	GridWorld	SUNY	FullObsDiscrete	Individual_Q	1.0	0.05	1000	3	True	IndivQLearningSlugs1k/223_22_3_slugs_decentralized	slugs_decentralized	shields/general_shield	0.05
IndivQLearningSlugs1k/223_22_3	slugs_decentralized	shields/general_shield	True	-10	False	GridWorld	SUNY	FullObsDiscrete	Individual_Q	1.0	0.05	1000	3	True	IndivQLearningSlugs1k/223_22_3_none	none		0.05
IndivQLearningSlugs1k/224_22_4	slugs_decentralized	shields/general_shield	True	-10	False	GridWorld	SUNY	FullObsDiscrete	Individual_Q	1.0	0.05	1000	4	True	IndivQLearningSlugs1k/224_22_4_slugs_centralized	slugs_centralized	shields/general_shield	0.05
IndivQLearningSlugs1k/224_22_4	slugs_decentralized	shields/general_shield	True	-10	False	GridWorld	SUNY	FullObsDiscrete	Individual_Q	1.0	0.05	1000	4	True	IndivQLearningSlugs1k/224_22_4_slugs_decentralized	slugs_decentralized	shields/general_shield	0.05
IndivQLearningSlugs1k/224_22_4	slugs_decentralized	shields/general_shield	True	-10	False	GridWorld	SUNY	FullObsDiscrete	Individual_Q	1.0	0.05	1000	4	True	IndivQLearningSlugs1k/224_22_4_none	none		0.05
IndivQLearningSlugs1k/225_22_5	slugs_decentralized	shields/general_shield	True	-10	False	GridWorld	SUNY	FullObsDiscrete	Individual_Q	1.0	0.05	1000	5	True	IndivQLearningSlugs1k/225_22_5_slugs_centralized	slugs_centralized	shields/general_shield	0.05
IndivQLearningSlugs1k/225_22_5	slugs_decentralized	shields/general_shield	True	-10	False	GridWorld	SUNY	FullObsDiscrete	Individual_Q	1.0	0.05	1000	5	True	IndivQLearningSlugs1k/225_22_5_slugs_decentralized	slugs_decentralized	shields/general_shield	0.05
IndivQLearningSlugs1k/225_22_5	slugs_decentralized	shields/general_shield	True	-10	False	GridWorld	SUNY	FullObsDiscrete	Individual_Q	1.0	0.05	1000	5	True	IndivQLearningSlugs1k/225_22_5_none	none		0.05
IndivQLearningSlugs1k/226_22_6	slugs_decentralized	shields/general_shield	True	-10	False	GridWorld	SUNY	FullObsDiscrete	Individual_Q	1.0	0.05	1000	6	True	IndivQLearningSlugs1k/226_22_6_slugs_centralized	slugs_centralized	shields/general_shield	0.05
IndivQLearningSlugs1k/226_22_6	slugs_decentralized	shields/general_shield	True	-10	False	GridWorld	SUNY	FullObsDiscrete	Individual_Q	1.0	0.05	1000	6	True	IndivQLearningSlugs1k/226_22_6_slugs_decentralized	slugs_decentralized	shields/general_shield	0.05
IndivQLearningSlugs1k/226_22_6	slugs_decentralized	shields/general_shield	True	-10	False	GridWorld	SUNY	FullObsDiscrete	Individual_Q	1.0	0.05	1000	6	True	IndivQLearningSlugs1k/226_22_6_none	none		0.05
IndivQLearningSlugs1k/227_22_7	slugs_decentralized	shields/general_shield	True	-10	False	GridWorld	SUNY	FullObsDiscrete	Individual_Q	1.0	0.05	1000	7	True	IndivQLearningSlugs1k/227_22_7_slugs_centralized	slugs_centralized	shields/general_shield	0.05
IndivQLearningSlugs1k/227_22_7	slugs_decentralized	shields/general_shield	True	-10	False	GridWorld	SUNY	FullObsDiscrete	Individual_Q	1.0	0.05	1000	7	True	IndivQLearningSlugs1k/227_22_7_slugs_decentralized	slugs_decentralized	shields/general_shield	0.05
IndivQLearningSlugs1k/227_22_7	slugs_decentralized	shields/general_shield	True	-10	False	GridWorld	SUNY	FullObsDiscrete	Individual_Q	1.0	0.05	1000	7	True	IndivQLearningSlugs1k/227_22_7_none	none		0.05
IndivQLearningSlugs1k/228_22_8	slugs_decentralized	shields/general_shield	True	-10	False	GridWorld	SUNY	FullObsDiscrete	Individual_Q	1.0	0.05	1000	8	True	IndivQLearningSlugs1k/228_22_8_slugs_centralized	slugs_centralized	shields/general_shield	0.05
IndivQLearningSlugs1k/228_22_8	slugs_decentralized	shields/general_shield	True	-10	False	GridWorld	SUNY	FullObsDiscrete	Individual_Q	1.0	0.05	1000	8	True	IndivQLearningSlugs1k/228_22_8_slugs_decentralized	slugs_decentralized	shields/general_shield	0.05
IndivQLearningSlugs1k/228_22_8	slugs_decentralized	shields/general_shield	True	-10	False	GridWorld	SUNY	FullObsDiscrete	Individual_Q	1.0	0.05	1000	8	True	IndivQLearningSlugs1k/228_22_8_none	none		0.05
IndivQLearningSlugs1k/229_22_9	slugs_decentralized	shields/general_shield	True	-10	False	GridWorld	SUNY	FullObsDiscrete	Individual_Q	1.0	0.05	1000	9	True	IndivQLearningSlugs1k/229_22_9_slugs_centralized	slugs_centralized	shields/general_shield	0.05
IndivQLearningSlugs1k/229_22_9	slugs_decentralized	shields/general_shield	True	-10	False	GridWorld	SUNY	FullObsDiscrete	Individual_Q	1.0	0.05	1000	9	True	IndivQLearningSlugs1k/229_22_9_slugs_decentralized	slugs_decentralized	shields/general_shield	0.05
IndivQLearningSlugs1k/229_22_9	slugs_decentralized	shields/general_shield	True	-10	False	GridWorld	SUNY	FullObsDiscrete	Individual_Q	1.0	0.05	1000	9	True	IndivQLearningSlugs1k/229_22_9_none	none		0.05
IndivQLearningSlugs1k/230_23_0	none		True	-10	False	GridWorld	SUNY	FullObsDiscrete	Individual_Q	1.0	0.05	1000	0	True	IndivQLearningSlugs1k/230_23_0_slugs_centralized	slugs_centralized	shields/general_shield	0.05
IndivQLearningSlugs1k/230_23_0	none		True	-10	False	GridWorld	SUNY	FullObsDiscrete	Individual_Q	1.0	0.05	1000	0	True	IndivQLearningSlugs1k/230_23_0_slugs_decentralized	slugs_decentralized	shields/general_shield	0.05
IndivQLearningSlugs1k/230_23_0	none		True	-10	False	GridWorld	SUNY	FullObsDiscrete	Individual_Q	1.0	0.05	1000	0	True	IndivQLearningSlugs1k/230_23_0_none	none		0.05
IndivQLearningSlugs1k/231_23_1	none		True	-10	False	GridWorld	SUNY	FullObsDiscrete	Individual_Q	1.0	0.05	1000	1	True	IndivQLearningSlugs1k/231_23_1_slugs_centralized	slugs_centralized	shields/general_shield	0.05
IndivQLearningSlugs1k/231_23_1	none		True	-10	False	GridWorld	SUNY	FullObsDiscrete	Individual_Q	1.0	0.05	1000	1	True	IndivQLearningSlugs1k/231_23_1_slugs_decentralized	slugs_decentralized	shields/general_shield	0.05
IndivQLearningSlugs1k/231_23_1	none		True	-10	False	GridWorld	SUNY	FullObsDiscrete	Individual_Q	1.0	0.05	1000	1	True	IndivQLearningSlugs1k/231_23_1_none	none		0.05
IndivQLearningSlugs1k/232_23_2	none		True	-10	False	GridWorld	SUNY	FullObsDiscrete	Individual_Q	1.0	0.05	1000	2	True	IndivQLearningSlugs1k/232_23_2_slugs_centralized	slugs_centralized	shields/general_shield	0.05
IndivQLearningSlugs1k/232_23_2	none		True	-10	False	GridWorld	SUNY	FullObsDiscrete	Individual_Q	1.0	0.05	1000	2	True	IndivQLearningSlugs1k/232_23_2_slugs_decentralized	slugs_decentralized	shields/general_shield	0.05
IndivQLearningSlugs1k/232_23_2	none		True	-10	False	GridWorld	SUNY	FullObsDiscrete	Individual_Q	1.0	0.05	1000	2	True	IndivQLearningSlugs1k/232_23_2_none	none		0.05
IndivQLearningSlugs1k/233_23_3	none		True	-10	False	GridWorld	SUNY	FullObsDiscrete	Individual_Q	1.0	0.05	1000	3	True	IndivQLearningSlugs1k/233_23_3_slugs_centralized	slugs_centralized	shields/general_shield	0.05
IndivQLearningSlugs1k/233_23_3	none		True	-10	False	GridWorld	SUNY	FullObsDiscrete	Individual_Q	1.0	0.05	1000	3	True	IndivQLearningSlugs1k/233_23_3_slugs_decentralized	slugs_decentralized	shields/general_shield	0.05
IndivQLearningSlugs1k/233_23_3	none		True	-10	False	GridWorld	SUNY	FullObsDiscrete	Individual_Q	1.0	0.05	1000	3	True	IndivQLearningSlugs1k/233_23_3_none	none		0.05
IndivQLearningSlugs1k/234_23_4	none		True	-10	False	GridWorld	SUNY	FullObsDiscrete	Individual_Q	1.0	0.05	1000	4	True	IndivQLearningSlugs1k/234_23_4_slugs_centralized	slugs_centralized	shields/general_shield	0.05
IndivQLearningSlugs1k/234_23_4	none		True	-10	False	GridWorld	SUNY	FullObsDiscrete	Individual_Q	1.0	0.05	1000	4	True	IndivQLearningSlugs1k/234_23_4_slugs_decentralized	slugs_decentralized	shields/general_shield	0.05
IndivQLearningSlugs1k/234_23_4	none		True	-10	False	GridWorld	SUNY	FullObsDiscrete	Individual_Q	1.0	0.05	1000	4	True	IndivQLearningSlugs1k/234_23_4_none	none		0.05
IndivQLearningSlugs1k/235_23_5	none		True	-10	False	GridWorld	SUNY	FullObsDiscrete	Individual_Q	1.0	0.05	1000	5	True	IndivQLearningSlugs1k/235_23_5_slugs_centralized	slugs_centralized	shields/general_shield	0.05
IndivQLearningSlugs1k/235_23_5	none		True	-10	False	GridWorld	SUNY	FullObsDiscrete	Individual_Q	1.0	0.05	1000	5	True	IndivQLearningSlugs1k/235_23_5_slugs_decentralized	slugs_decentralized	shields/general_shield	0.05
IndivQLearningSlugs1k/235_23_5	none		True	-10	False	GridWorld	SUNY	FullObsDiscrete	Individual_Q	1.0	0.05	1000	5	True	IndivQLearningSlugs1k/235_23_5_none	none		0.05
IndivQLearningSlugs1k/236_23_6	none		True	-10	False	GridWorld	SUNY	FullObsDiscrete	Individual_Q	1.0	0.05	1000	6	True	IndivQLearningSlugs1k/236_23_6_slugs_centralized	slugs_centralized	shields/general_shield	0.05
IndivQLearningSlugs1k/236_23_6	none		True	-10	False	GridWorld	SUNY	FullObsDiscrete	Individual_Q	1.0	0.05	1000	6	True	IndivQLearningSlugs1k/236_23_6_slugs_decentralized	slugs_decentralized	shields/general_shield	0.05
IndivQLearningSlugs1k/236_23_6	none		True	-10	False	GridWorld	SUNY	FullObsDiscrete	Individual_Q	1.0	0.05	1000	6	True	IndivQLearningSlugs1k/236_23_6_none	none		0.05
IndivQLearningSlugs1k/237_23_7	none		True	-10	False	GridWorld	SUNY	FullObsDiscrete	Individual_Q	1.0	0.05	1000	7	True	IndivQLearningSlugs1k/237_23_7_slugs_centralized	slugs_centralized	shields/general_shield	0.05
IndivQLearningSlugs1k/237_23_7	none		True	-10	False	GridWorld	SUNY	FullObsDiscrete	Individual_Q	1.0	0.05	1000	7	True	IndivQLearningSlugs1k/237_23_7_slugs_decentralized	slugs_decentralized	shields/general_shield	0.05
IndivQLearningSlugs1k/237_23_7	none		True	-10	False	GridWorld	SUNY	FullObsDiscrete	Individual_Q	1.0	0.05	1000	7	True	IndivQLearningSlugs1k/237_23_7_none	none		0.05
IndivQLearningSlugs1k/238_23_8	none		True	-10	False	GridWorld	SUNY	FullObsDiscrete	Individual_Q	1.0	0.05	1000	8	True	IndivQLearningSlugs1k/238_23_8_slugs_centralized	slugs_centralized	shields/general_shield	0.05
IndivQLearningSlugs1k/238_23_8	none		True	-10	False	GridWorld	SUNY	FullObsDiscrete	Individual_Q	1.0	0.05	1000	8	True	IndivQLearningSlugs1k/238_23_8_slugs_decentralized	slugs_decentralized	shields/general_shield	0.05
IndivQLearningSlugs1k/238_23_8	none		True	-10	False	GridWorld	SUNY	FullObsDiscrete	Individual_Q	1.0	0.05	1000	8	True	IndivQLearningSlugs1k/238_23_8_none	none		0.05
IndivQLearningSlugs1k/239_23_9	none		True	-10	False	GridWorld	SUNY	FullObsDiscrete	Individual_Q	1.0	0.05	1000	9	True	IndivQLearningSlugs1k/239_23_9_slugs_centralized	slugs_centralized	shields/general_shield	0.05
IndivQLearningSlugs1k/239_23_9	none		True	-10	False	GridWorld	SUNY	FullObsDiscrete	Individual_Q	1.0	0.05	1000	9	True	IndivQLearningSlugs1k/239_23_9_slugs_decentralized	slugs_decentralized	shields/general_shield	0.05
IndivQLearningSlugs1k/239_23_9	none		True	-10	False	GridWorld	SUNY	FullObsDiscrete	Individual_Q	1.0	0.05	1000	9	True	IndivQLearningSlugs1k/239_23_9_none	none		0.05
