# Supplementary material
Source: ML conference proceedings conference paper supplement (https://proceedings.neurips.cc/paper_files/paper/2022/hash/57444e14ecd9e2c8f603b4f012ce3811-Abstract.html)
Supplement: Supplementary file 1 [file 57444e14ecd9e2c8f603b4f012ce3811-Supplemental-Conference.zip › 3410_shield_decentralization_for_sa-Supplementary Material/parallel_configs/IndivQLearningSlugsConsistentOrderEval.csv]

run_name	shield	shield_specification	punish_unsafe_orig_action	punish_unsafe_orig_action_modifier	shield_decentralized_random_agent_order	randomize_starts	map_type	grid_world_map_name	grid_world_obs_type	learner_type	learner_anneal_eps_start	learner_anneal_eps_finish	max_total_steps	seed	skip_training	evaluation_run_name	evaluation_shield	evaluation_shield_specification	evaluation_shield_decentralized_random_agent_order	learner_evaluation_epsilon
IndivQLearningSlugsConsistentOrder/0_0_0	slugs_centralized	shields/general_shield	True	-10		True	GridWorld	Pentagon	FullObsDiscrete	Individual_Q	1.0	0.05	2500000	0	True	IndivQLearningSlugsConsistentOrder/0_0_0_slugs_centralized	slugs_centralized	shields/general_shield		0.05
IndivQLearningSlugsConsistentOrder/0_0_0	slugs_centralized	shields/general_shield	True	-10		True	GridWorld	Pentagon	FullObsDiscrete	Individual_Q	1.0	0.05	2500000	0	True	IndivQLearningSlugsConsistentOrder/0_0_0_slugs_decentralized	slugs_decentralized	shields/general_shield	False	0.05
IndivQLearningSlugsConsistentOrder/0_0_0	slugs_centralized	shields/general_shield	True	-10		True	GridWorld	Pentagon	FullObsDiscrete	Individual_Q	1.0	0.05	2500000	0	True	IndivQLearningSlugsConsistentOrder/0_0_0_none	none			0.05
IndivQLearningSlugsConsistentOrder/1_0_1	slugs_centralized	shields/general_shield	True	-10		True	GridWorld	Pentagon	FullObsDiscrete	Individual_Q	1.0	0.05	2500000	1	True	IndivQLearningSlugsConsistentOrder/1_0_1_slugs_centralized	slugs_centralized	shields/general_shield		0.05
IndivQLearningSlugsConsistentOrder/1_0_1	slugs_centralized	shields/general_shield	True	-10		True	GridWorld	Pentagon	FullObsDiscrete	Individual_Q	1.0	0.05	2500000	1	True	IndivQLearningSlugsConsistentOrder/1_0_1_slugs_decentralized	slugs_decentralized	shields/general_shield	False	0.05
IndivQLearningSlugsConsistentOrder/1_0_1	slugs_centralized	shields/general_shield	True	-10		True	GridWorld	Pentagon	FullObsDiscrete	Individual_Q	1.0	0.05	2500000	1	True	IndivQLearningSlugsConsistentOrder/1_0_1_none	none			0.05
IndivQLearningSlugsConsistentOrder/2_0_2	slugs_centralized	shields/general_shield	True	-10		True	GridWorld	Pentagon	FullObsDiscrete	Individual_Q	1.0	0.05	2500000	2	True	IndivQLearningSlugsConsistentOrder/2_0_2_slugs_centralized	slugs_centralized	shields/general_shield		0.05
IndivQLearningSlugsConsistentOrder/2_0_2	slugs_centralized	shields/general_shield	True	-10		True	GridWorld	Pentagon	FullObsDiscrete	Individual_Q	1.0	0.05	2500000	2	True	IndivQLearningSlugsConsistentOrder/2_0_2_slugs_decentralized	slugs_decentralized	shields/general_shield	False	0.05
IndivQLearningSlugsConsistentOrder/2_0_2	slugs_centralized	shields/general_shield	True	-10		True	GridWorld	Pentagon	FullObsDiscrete	Individual_Q	1.0	0.05	2500000	2	True	IndivQLearningSlugsConsistentOrder/2_0_2_none	none			0.05
IndivQLearningSlugsConsistentOrder/3_0_3	slugs_centralized	shields/general_shield	True	-10		True	GridWorld	Pentagon	FullObsDiscrete	Individual_Q	1.0	0.05	2500000	3	True	IndivQLearningSlugsConsistentOrder/3_0_3_slugs_centralized	slugs_centralized	shields/general_shield		0.05
IndivQLearningSlugsConsistentOrder/3_0_3	slugs_centralized	shields/general_shield	True	-10		True	GridWorld	Pentagon	FullObsDiscrete	Individual_Q	1.0	0.05	2500000	3	True	IndivQLearningSlugsConsistentOrder/3_0_3_slugs_decentralized	slugs_decentralized	shields/general_shield	False	0.05
IndivQLearningSlugsConsistentOrder/3_0_3	slugs_centralized	shields/general_shield	True	-10		True	GridWorld	Pentagon	FullObsDiscrete	Individual_Q	1.0	0.05	2500000	3	True	IndivQLearningSlugsConsistentOrder/3_0_3_none	none			0.05
IndivQLearningSlugsConsistentOrder/4_0_4	slugs_centralized	shields/general_shield	True	-10		True	GridWorld	Pentagon	FullObsDiscrete	Individual_Q	1.0	0.05	2500000	4	True	IndivQLearningSlugsConsistentOrder/4_0_4_slugs_centralized	slugs_centralized	shields/general_shield		0.05
IndivQLearningSlugsConsistentOrder/4_0_4	slugs_centralized	shields/general_shield	True	-10		True	GridWorld	Pentagon	FullObsDiscrete	Individual_Q	1.0	0.05	2500000	4	True	IndivQLearningSlugsConsistentOrder/4_0_4_slugs_decentralized	slugs_decentralized	shields/general_shield	False	0.05
IndivQLearningSlugsConsistentOrder/4_0_4	slugs_centralized	shields/general_shield	True	-10		True	GridWorld	Pentagon	FullObsDiscrete	Individual_Q	1.0	0.05	2500000	4	True	IndivQLearningSlugsConsistentOrder/4_0_4_none	none			0.05
IndivQLearningSlugsConsistentOrder/5_0_5	slugs_centralized	shields/general_shield	True	-10		True	GridWorld	Pentagon	FullObsDiscrete	Individual_Q	1.0	0.05	2500000	5	True	IndivQLearningSlugsConsistentOrder/5_0_5_slugs_centralized	slugs_centralized	shields/general_shield		0.05
IndivQLearningSlugsConsistentOrder/5_0_5	slugs_centralized	shields/general_shield	True	-10		True	GridWorld	Pentagon	FullObsDiscrete	Individual_Q	1.0	0.05	2500000	5	True	IndivQLearningSlugsConsistentOrder/5_0_5_slugs_decentralized	slugs_decentralized	shields/general_shield	False	0.05
IndivQLearningSlugsConsistentOrder/5_0_5	slugs_centralized	shields/general_shield	True	-10		True	GridWorld	Pentagon	FullObsDiscrete	Individual_Q	1.0	0.05	2500000	5	True	IndivQLearningSlugsConsistentOrder/5_0_5_none	none			0.05
IndivQLearningSlugsConsistentOrder/6_0_6	slugs_centralized	shields/general_shield	True	-10		True	GridWorld	Pentagon	FullObsDiscrete	Individual_Q	1.0	0.05	2500000	6	True	IndivQLearningSlugsConsistentOrder/6_0_6_slugs_centralized	slugs_centralized	shields/general_shield		0.05
IndivQLearningSlugsConsistentOrder/6_0_6	slugs_centralized	shields/general_shield	True	-10		True	GridWorld	Pentagon	FullObsDiscrete	Individual_Q	1.0	0.05	2500000	6	True	IndivQLearningSlugsConsistentOrder/6_0_6_slugs_decentralized	slugs_decentralized	shields/general_shield	False	0.05
IndivQLearningSlugsConsistentOrder/6_0_6	slugs_centralized	shields/general_shield	True	-10		True	GridWorld	Pentagon	FullObsDiscrete	Individual_Q	1.0	0.05	2500000	6	True	IndivQLearningSlugsConsistentOrder/6_0_6_none	none			0.05
IndivQLearningSlugsConsistentOrder/7_0_7	slugs_centralized	shields/general_shield	True	-10		True	GridWorld	Pentagon	FullObsDiscrete	Individual_Q	1.0	0.05	2500000	7	True	IndivQLearningSlugsConsistentOrder/7_0_7_slugs_centralized	slugs_centralized	shields/general_shield		0.05
IndivQLearningSlugsConsistentOrder/7_0_7	slugs_centralized	shields/general_shield	True	-10		True	GridWorld	Pentagon	FullObsDiscrete	Individual_Q	1.0	0.05	2500000	7	True	IndivQLearningSlugsConsistentOrder/7_0_7_slugs_decentralized	slugs_decentralized	shields/general_shield	False	0.05
IndivQLearningSlugsConsistentOrder/7_0_7	slugs_centralized	shields/general_shield	True	-10		True	GridWorld	Pentagon	FullObsDiscrete	Individual_Q	1.0	0.05	2500000	7	True	IndivQLearningSlugsConsistentOrder/7_0_7_none	none			0.05
IndivQLearningSlugsConsistentOrder/8_0_8	slugs_centralized	shields/general_shield	True	-10		True	GridWorld	Pentagon	FullObsDiscrete	Individual_Q	1.0	0.05	2500000	8	True	IndivQLearningSlugsConsistentOrder/8_0_8_slugs_centralized	slugs_centralized	shields/general_shield		0.05
IndivQLearningSlugsConsistentOrder/8_0_8	slugs_centralized	shields/general_shield	True	-10		True	GridWorld	Pentagon	FullObsDiscrete	Individual_Q	1.0	0.05	2500000	8	True	IndivQLearningSlugsConsistentOrder/8_0_8_slugs_decentralized	slugs_decentralized	shields/general_shield	False	0.05
IndivQLearningSlugsConsistentOrder/8_0_8	slugs_centralized	shields/general_shield	True	-10		True	GridWorld	Pentagon	FullObsDiscrete	Individual_Q	1.0	0.05	2500000	8	True	IndivQLearningSlugsConsistentOrder/8_0_8_none	none			0.05
IndivQLearningSlugsConsistentOrder/9_0_9	slugs_centralized	shields/general_shield	True	-10		True	GridWorld	Pentagon	FullObsDiscrete	Individual_Q	1.0	0.05	2500000	9	True	IndivQLearningSlugsConsistentOrder/9_0_9_slugs_centralized	slugs_centralized	shields/general_shield		0.05
IndivQLearningSlugsConsistentOrder/9_0_9	slugs_centralized	shields/general_shield	True	-10		True	GridWorld	Pentagon	FullObsDiscrete	Individual_Q	1.0	0.05	2500000	9	True	IndivQLearningSlugsConsistentOrder/9_0_9_slugs_decentralized	slugs_decentralized	shields/general_shield	False	0.05
IndivQLearningSlugsConsistentOrder/9_0_9	slugs_centralized	shields/general_shield	True	-10		True	GridWorld	Pentagon	FullObsDiscrete	Individual_Q	1.0	0.05	2500000	9	True	IndivQLearningSlugsConsistentOrder/9_0_9_none	none			0.05
IndivQLearningSlugsConsistentOrder/10_1_0	slugs_decentralized	shields/general_shield	True	-10	False	True	GridWorld	Pentagon	FullObsDiscrete	Individual_Q	1.0	0.05	2500000	0	True	IndivQLearningSlugsConsistentOrder/10_1_0_slugs_centralized	slugs_centralized	shields/general_shield		0.05
IndivQLearningSlugsConsistentOrder/10_1_0	slugs_decentralized	shields/general_shield	True	-10	False	True	GridWorld	Pentagon	FullObsDiscrete	Individual_Q	1.0	0.05	2500000	0	True	IndivQLearningSlugsConsistentOrder/10_1_0_slugs_decentralized	slugs_decentralized	shields/general_shield	False	0.05
IndivQLearningSlugsConsistentOrder/10_1_0	slugs_decentralized	shields/general_shield	True	-10	False	True	GridWorld	Pentagon	FullObsDiscrete	Individual_Q	1.0	0.05	2500000	0	True	IndivQLearningSlugsConsistentOrder/10_1_0_none	none			0.05
IndivQLearningSlugsConsistentOrder/11_1_1	slugs_decentralized	shields/general_shield	True	-10	False	True	GridWorld	Pentagon	FullObsDiscrete	Individual_Q	1.0	0.05	2500000	1	True	IndivQLearningSlugsConsistentOrder/11_1_1_slugs_centralized	slugs_centralized	shields/general_shield		0.05
IndivQLearningSlugsConsistentOrder/11_1_1	slugs_decentralized	shields/general_shield	True	-10	False	True	GridWorld	Pentagon	FullObsDiscrete	Individual_Q	1.0	0.05	2500000	1	True	IndivQLearningSlugsConsistentOrder/11_1_1_slugs_decentralized	slugs_decentralized	shields/general_shield	False	0.05
IndivQLearningSlugsConsistentOrder/11_1_1	slugs_decentralized	shields/general_shield	True	-10	False	True	GridWorld	Pentagon	FullObsDiscrete	Individual_Q	1.0	0.05	2500000	1	True	IndivQLearningSlugsConsistentOrder/11_1_1_none	none			0.05
IndivQLearningSlugsConsistentOrder/12_1_2	slugs_decentralized	shields/general_shield	True	-10	False	True	GridWorld	Pentagon	FullObsDiscrete	Individual_Q	1.0	0.05	2500000	2	True	IndivQLearningSlugsConsistentOrder/12_1_2_slugs_centralized	slugs_centralized	shields/general_shield		0.05
IndivQLearningSlugsConsistentOrder/12_1_2	slugs_decentralized	shields/general_shield	True	-10	False	True	GridWorld	Pentagon	FullObsDiscrete	Individual_Q	1.0	0.05	2500000	2	True	IndivQLearningSlugsConsistentOrder/12_1_2_slugs_decentralized	slugs_decentralized	shields/general_shield	False	0.05
IndivQLearningSlugsConsistentOrder/12_1_2	slugs_decentralized	shields/general_shield	True	-10	False	True	GridWorld	Pentagon	FullObsDiscrete	Individual_Q	1.0	0.05	2500000	2	True	IndivQLearningSlugsConsistentOrder/12_1_2_none	none			0.05
IndivQLearningSlugsConsistentOrder/13_1_3	slugs_decentralized	shields/general_shield	True	-10	False	True	GridWorld	Pentagon	FullObsDiscrete	Individual_Q	1.0	0.05	2500000	3	True	IndivQLearningSlugsConsistentOrder/13_1_3_slugs_centralized	slugs_centralized	shields/general_shield		0.05
IndivQLearningSlugsConsistentOrder/13_1_3	slugs_decentralized	shields/general_shield	True	-10	False	True	GridWorld	Pentagon	FullObsDiscrete	Individual_Q	1.0	0.05	2500000	3	True	IndivQLearningSlugsConsistentOrder/13_1_3_slugs_decentralized	slugs_decentralized	shields/general_shield	False	0.05
IndivQLearningSlugsConsistentOrder/13_1_3	slugs_decentralized	shields/general_shield	True	-10	False	True	GridWorld	Pentagon	FullObsDiscrete	Individual_Q	1.0	0.05	2500000	3	True	IndivQLearningSlugsConsistentOrder/13_1_3_none	none			0.05
IndivQLearningSlugsConsistentOrder/14_1_4	slugs_decentralized	shields/general_shield	True	-10	False	True	GridWorld	Pentagon	FullObsDiscrete	Individual_Q	1.0	0.05	2500000	4	True	IndivQLearningSlugsConsistentOrder/14_1_4_slugs_centralized	slugs_centralized	shields/general_shield		0.05
IndivQLearningSlugsConsistentOrder/14_1_4	slugs_decentralized	shields/general_shield	True	-10	False	True	GridWorld	Pentagon	FullObsDiscrete	Individual_Q	1.0	0.05	2500000	4	True	IndivQLearningSlugsConsistentOrder/14_1_4_slugs_decentralized	slugs_decentralized	shields/general_shield	False	0.05
IndivQLearningSlugsConsistentOrder/14_1_4	slugs_decentralized	shields/general_shield	True	-10	False	True	GridWorld	Pentagon	FullObsDiscrete	Individual_Q	1.0	0.05	2500000	4	True	IndivQLearningSlugsConsistentOrder/14_1_4_none	none			0.05
IndivQLearningSlugsConsistentOrder/15_1_5	slugs_decentralized	shields/general_shield	True	-10	False	True	GridWorld	Pentagon	FullObsDiscrete	Individual_Q	1.0	0.05	2500000	5	True	IndivQLearningSlugsConsistentOrder/15_1_5_slugs_centralized	slugs_centralized	shields/general_shield		0.05
IndivQLearningSlugsConsistentOrder/15_1_5	slugs_decentralized	shields/general_shield	True	-10	False	True	GridWorld	Pentagon	FullObsDiscrete	Individual_Q	1.0	0.05	2500000	5	True	IndivQLearningSlugsConsistentOrder/15_1_5_slugs_decentralized	slugs_decentralized	shields/general_shield	False	0.05
IndivQLearningSlugsConsistentOrder/15_1_5	slugs_decentralized	shields/general_shield	True	-10	False	True	GridWorld	Pentagon	FullObsDiscrete	Individual_Q	1.0	0.05	2500000	5	True	IndivQLearningSlugsConsistentOrder/15_1_5_none	none			0.05
IndivQLearningSlugsConsistentOrder/16_1_6	slugs_decentralized	shields/general_shield	True	-10	False	True	GridWorld	Pentagon	FullObsDiscrete	Individual_Q	1.0	0.05	2500000	6	True	IndivQLearningSlugsConsistentOrder/16_1_6_slugs_centralized	slugs_centralized	shields/general_shield		0.05
IndivQLearningSlugsConsistentOrder/16_1_6	slugs_decentralized	shields/general_shield	True	-10	False	True	GridWorld	Pentagon	FullObsDiscrete	Individual_Q	1.0	0.05	2500000	6	True	IndivQLearningSlugsConsistentOrder/16_1_6_slugs_decentralized	slugs_decentralized	shields/general_shield	False	0.05
IndivQLearningSlugsConsistentOrder/16_1_6	slugs_decentralized	shields/general_shield	True	-10	False	True	GridWorld	Pentagon	FullObsDiscrete	Individual_Q	1.0	0.05	2500000	6	True	IndivQLearningSlugsConsistentOrder/16_1_6_none	none			0.05
IndivQLearningSlugsConsistentOrder/17_1_7	slugs_decentralized	shields/general_shield	True	-10	False	True	GridWorld	Pentagon	FullObsDiscrete	Individual_Q	1.0	0.05	2500000	7	True	IndivQLearningSlugsConsistentOrder/17_1_7_slugs_centralized	slugs_centralized	shields/general_shield		0.05
IndivQLearningSlugsConsistentOrder/17_1_7	slugs_decentralized	shields/general_shield	True	-10	False	True	GridWorld	Pentagon	FullObsDiscrete	Individual_Q	1.0	0.05	2500000	7	True	IndivQLearningSlugsConsistentOrder/17_1_7_slugs_decentralized	slugs_decentralized	shields/general_shield	False	0.05
IndivQLearningSlugsConsistentOrder/17_1_7	slugs_decentralized	shields/general_shield	True	-10	False	True	GridWorld	Pentagon	FullObsDiscrete	Individual_Q	1.0	0.05	2500000	7	True	IndivQLearningSlugsConsistentOrder/17_1_7_none	none			0.05
IndivQLearningSlugsConsistentOrder/18_1_8	slugs_decentralized	shields/general_shield	True	-10	False	True	GridWorld	Pentagon	FullObsDiscrete	Individual_Q	1.0	0.05	2500000	8	True	IndivQLearningSlugsConsistentOrder/18_1_8_slugs_centralized	slugs_centralized	shields/general_shield		0.05
IndivQLearningSlugsConsistentOrder/18_1_8	slugs_decentralized	shields/general_shield	True	-10	False	True	GridWorld	Pentagon	FullObsDiscrete	Individual_Q	1.0	0.05	2500000	8	True	IndivQLearningSlugsConsistentOrder/18_1_8_slugs_decentralized	slugs_decentralized	shields/general_shield	False	0.05
IndivQLearningSlugsConsistentOrder/18_1_8	slugs_decentralized	shields/general_shield	True	-10	False	True	GridWorld	Pentagon	FullObsDiscrete	Individual_Q	1.0	0.05	2500000	8	True	IndivQLearningSlugsConsistentOrder/18_1_8_none	none			0.05
IndivQLearningSlugsConsistentOrder/19_1_9	slugs_decentralized	shields/general_shield	True	-10	False	True	GridWorld	Pentagon	FullObsDiscrete	Individual_Q	1.0	0.05	2500000	9	True	IndivQLearningSlugsConsistentOrder/19_1_9_slugs_centralized	slugs_centralized	shields/general_shield		0.05
IndivQLearningSlugsConsistentOrder/19_1_9	slugs_decentralized	shields/general_shield	True	-10	False	True	GridWorld	Pentagon	FullObsDiscrete	Individual_Q	1.0	0.05	2500000	9	True	IndivQLearningSlugsConsistentOrder/19_1_9_slugs_decentralized	slugs_decentralized	shields/general_shield	False	0.05
IndivQLearningSlugsConsistentOrder/19_1_9	slugs_decentralized	shields/general_shield	True	-10	False	True	GridWorld	Pentagon	FullObsDiscrete	Individual_Q	1.0	0.05	2500000	9	True	IndivQLearningSlugsConsistentOrder/19_1_9_none	none			0.05
IndivQLearningSlugsConsistentOrder/20_2_0	none		True	-10		True	GridWorld	Pentagon	FullObsDiscrete	Individual_Q	1.0	0.05	2500000	0	True	IndivQLearningSlugsConsistentOrder/20_2_0_slugs_centralized	slugs_centralized	shields/general_shield		0.05
IndivQLearningSlugsConsistentOrder/20_2_0	none		True	-10		True	GridWorld	Pentagon	FullObsDiscrete	Individual_Q	1.0	0.05	2500000	0	True	IndivQLearningSlugsConsistentOrder/20_2_0_slugs_decentralized	slugs_decentralized	shields/general_shield	False	0.05
IndivQLearningSlugsConsistentOrder/20_2_0	none		True	-10		True	GridWorld	Pentagon	FullObsDiscrete	Individual_Q	1.0	0.05	2500000	0	True	IndivQLearningSlugsConsistentOrder/20_2_0_none	none			0.05
IndivQLearningSlugsConsistentOrder/21_2_1	none		True	-10		True	GridWorld	Pentagon	FullObsDiscrete	Individual_Q	1.0	0.05	2500000	1	True	IndivQLearningSlugsConsistentOrder/21_2_1_slugs_centralized	slugs_centralized	shields/general_shield		0.05
IndivQLearningSlugsConsistentOrder/21_2_1	none		True	-10		True	GridWorld	Pentagon	FullObsDiscrete	Individual_Q	1.0	0.05	2500000	1	True	IndivQLearningSlugsConsistentOrder/21_2_1_slugs_decentralized	slugs_decentralized	shields/general_shield	False	0.05
IndivQLearningSlugsConsistentOrder/21_2_1	none		True	-10		True	GridWorld	Pentagon	FullObsDiscrete	Individual_Q	1.0	0.05	2500000	1	True	IndivQLearningSlugsConsistentOrder/21_2_1_none	none			0.05
IndivQLearningSlugsConsistentOrder/22_2_2	none		True	-10		True	GridWorld	Pentagon	FullObsDiscrete	Individual_Q	1.0	0.05	2500000	2	True	IndivQLearningSlugsConsistentOrder/22_2_2_slugs_centralized	slugs_centralized	shields/general_shield		0.05
IndivQLearningSlugsConsistentOrder/22_2_2	none		True	-10		True	GridWorld	Pentagon	FullObsDiscrete	Individual_Q	1.0	0.05	2500000	2	True	IndivQLearningSlugsConsistentOrder/22_2_2_slugs_decentralized	slugs_decentralized	shields/general_shield	False	0.05
IndivQLearningSlugsConsistentOrder/22_2_2	none		True	-10		True	GridWorld	Pentagon	FullObsDiscrete	Individual_Q	1.0	0.05	2500000	2	True	IndivQLearningSlugsConsistentOrder/22_2_2_none	none			0.05
IndivQLearningSlugsConsistentOrder/23_2_3	none		True	-10		True	GridWorld	Pentagon	FullObsDiscrete	Individual_Q	1.0	0.05	2500000	3	True	IndivQLearningSlugsConsistentOrder/23_2_3_slugs_centralized	slugs_centralized	shields/general_shield		0.05
IndivQLearningSlugsConsistentOrder/23_2_3	none		True	-10		True	GridWorld	Pentagon	FullObsDiscrete	Individual_Q	1.0	0.05	2500000	3	True	IndivQLearningSlugsConsistentOrder/23_2_3_slugs_decentralized	slugs_decentralized	shields/general_shield	False	0.05
IndivQLearningSlugsConsistentOrder/23_2_3	none		True	-10		True	GridWorld	Pentagon	FullObsDiscrete	Individual_Q	1.0	0.05	2500000	3	True	IndivQLearningSlugsConsistentOrder/23_2_3_none	none			0.05
IndivQLearningSlugsConsistentOrder/24_2_4	none		True	-10		True	GridWorld	Pentagon	FullObsDiscrete	Individual_Q	1.0	0.05	2500000	4	True	IndivQLearningSlugsConsistentOrder/24_2_4_slugs_centralized	slugs_centralized	shields/general_shield		0.05
IndivQLearningSlugsConsistentOrder/24_2_4	none		True	-10		True	GridWorld	Pentagon	FullObsDiscrete	Individual_Q	1.0	0.05	2500000	4	True	IndivQLearningSlugsConsistentOrder/24_2_4_slugs_decentralized	slugs_decentralized	shields/general_shield	False	0.05
IndivQLearningSlugsConsistentOrder/24_2_4	none		True	-10		True	GridWorld	Pentagon	FullObsDiscrete	Individual_Q	1.0	0.05	2500000	4	True	IndivQLearningSlugsConsistentOrder/24_2_4_none	none			0.05
IndivQLearningSlugsConsistentOrder/25_2_5	none		True	-10		True	GridWorld	Pentagon	FullObsDiscrete	Individual_Q	1.0	0.05	2500000	5	True	IndivQLearningSlugsConsistentOrder/25_2_5_slugs_centralized	slugs_centralized	shields/general_shield		0.05
IndivQLearningSlugsConsistentOrder/25_2_5	none		True	-10		True	GridWorld	Pentagon	FullObsDiscrete	Individual_Q	1.0	0.05	2500000	5	True	IndivQLearningSlugsConsistentOrder/25_2_5_slugs_decentralized	slugs_decentralized	shields/general_shield	False	0.05
IndivQLearningSlugsConsistentOrder/25_2_5	none		True	-10		True	GridWorld	Pentagon	FullObsDiscrete	Individual_Q	1.0	0.05	2500000	5	True	IndivQLearningSlugsConsistentOrder/25_2_5_none	none			0.05
IndivQLearningSlugsConsistentOrder/26_2_6	none		True	-10		True	GridWorld	Pentagon	FullObsDiscrete	Individual_Q	1.0	0.05	2500000	6	True	IndivQLearningSlugsConsistentOrder/26_2_6_slugs_centralized	slugs_centralized	shields/general_shield		0.05
IndivQLearningSlugsConsistentOrder/26_2_6	none		True	-10		True	GridWorld	Pentagon	FullObsDiscrete	Individual_Q	1.0	0.05	2500000	6	True	IndivQLearningSlugsConsistentOrder/26_2_6_slugs_decentralized	slugs_decentralized	shields/general_shield	False	0.05
IndivQLearningSlugsConsistentOrder/26_2_6	none		True	-10		True	GridWorld	Pentagon	FullObsDiscrete	Individual_Q	1.0	0.05	2500000	6	True	IndivQLearningSlugsConsistentOrder/26_2_6_none	none			0.05
IndivQLearningSlugsConsistentOrder/27_2_7	none		True	-10		True	GridWorld	Pentagon	FullObsDiscrete	Individual_Q	1.0	0.05	2500000	7	True	IndivQLearningSlugsConsistentOrder/27_2_7_slugs_centralized	slugs_centralized	shields/general_shield		0.05
IndivQLearningSlugsConsistentOrder/27_2_7	none		True	-10		True	GridWorld	Pentagon	FullObsDiscrete	Individual_Q	1.0	0.05	2500000	7	True	IndivQLearningSlugsConsistentOrder/27_2_7_slugs_decentralized	slugs_decentralized	shields/general_shield	False	0.05
IndivQLearningSlugsConsistentOrder/27_2_7	none		True	-10		True	GridWorld	Pentagon	FullObsDiscrete	Individual_Q	1.0	0.05	2500000	7	True	IndivQLearningSlugsConsistentOrder/27_2_7_none	none			0.05
IndivQLearningSlugsConsistentOrder/28_2_8	none		True	-10		True	GridWorld	Pentagon	FullObsDiscrete	Individual_Q	1.0	0.05	2500000	8	True	IndivQLearningSlugsConsistentOrder/28_2_8_slugs_centralized	slugs_centralized	shields/general_shield		0.05
IndivQLearningSlugsConsistentOrder/28_2_8	none		True	-10		True	GridWorld	Pentagon	FullObsDiscrete	Individual_Q	1.0	0.05	2500000	8	True	IndivQLearningSlugsConsistentOrder/28_2_8_slugs_decentralized	slugs_decentralized	shields/general_shield	False	0.05
IndivQLearningSlugsConsistentOrder/28_2_8	none		True	-10		True	GridWorld	Pentagon	FullObsDiscrete	Individual_Q	1.0	0.05	2500000	8	True	IndivQLearningSlugsConsistentOrder/28_2_8_none	none			0.05
IndivQLearningSlugsConsistentOrder/29_2_9	none		True	-10		True	GridWorld	Pentagon	FullObsDiscrete	Individual_Q	1.0	0.05	2500000	9	True	IndivQLearningSlugsConsistentOrder/29_2_9_slugs_centralized	slugs_centralized	shields/general_shield		0.05
IndivQLearningSlugsConsistentOrder/29_2_9	none		True	-10		True	GridWorld	Pentagon	FullObsDiscrete	Individual_Q	1.0	0.05	2500000	9	True	IndivQLearningSlugsConsistentOrder/29_2_9_slugs_decentralized	slugs_decentralized	shields/general_shield	False	0.05
IndivQLearningSlugsConsistentOrder/29_2_9	none		True	-10		True	GridWorld	Pentagon	FullObsDiscrete	Individual_Q	1.0	0.05	2500000	9	True	IndivQLearningSlugsConsistentOrder/29_2_9_none	none			0.05
IndivQLearningSlugsConsistentOrder/30_3_0	slugs_centralized	shields/general_shield	True	-10		False	GridWorld	Pentagon	FullObsDiscrete	Individual_Q	1.0	0.05	2500000	0	True	IndivQLearningSlugsConsistentOrder/30_3_0_slugs_centralized	slugs_centralized	shields/general_shield		0.05
IndivQLearningSlugsConsistentOrder/30_3_0	slugs_centralized	shields/general_shield	True	-10		False	GridWorld	Pentagon	FullObsDiscrete	Individual_Q	1.0	0.05	2500000	0	True	IndivQLearningSlugsConsistentOrder/30_3_0_slugs_decentralized	slugs_decentralized	shields/general_shield	False	0.05
IndivQLearningSlugsConsistentOrder/30_3_0	slugs_centralized	shields/general_shield	True	-10		False	GridWorld	Pentagon	FullObsDiscrete	Individual_Q	1.0	0.05	2500000	0	True	IndivQLearningSlugsConsistentOrder/30_3_0_none	none			0.05
IndivQLearningSlugsConsistentOrder/31_3_1	slugs_centralized	shields/general_shield	True	-10		False	GridWorld	Pentagon	FullObsDiscrete	Individual_Q	1.0	0.05	2500000	1	True	IndivQLearningSlugsConsistentOrder/31_3_1_slugs_centralized	slugs_centralized	shields/general_shield		0.05
IndivQLearningSlugsConsistentOrder/31_3_1	slugs_centralized	shields/general_shield	True	-10		False	GridWorld	Pentagon	FullObsDiscrete	Individual_Q	1.0	0.05	2500000	1	True	IndivQLearningSlugsConsistentOrder/31_3_1_slugs_decentralized	slugs_decentralized	shields/general_shield	False	0.05
IndivQLearningSlugsConsistentOrder/31_3_1	slugs_centralized	shields/general_shield	True	-10		False	GridWorld	Pentagon	FullObsDiscrete	Individual_Q	1.0	0.05	2500000	1	True	IndivQLearningSlugsConsistentOrder/31_3_1_none	none			0.05
IndivQLearningSlugsConsistentOrder/32_3_2	slugs_centralized	shields/general_shield	True	-10		False	GridWorld	Pentagon	FullObsDiscrete	Individual_Q	1.0	0.05	2500000	2	True	IndivQLearningSlugsConsistentOrder/32_3_2_slugs_centralized	slugs_centralized	shields/general_shield		0.05
IndivQLearningSlugsConsistentOrder/32_3_2	slugs_centralized	shields/general_shield	True	-10		False	GridWorld	Pentagon	FullObsDiscrete	Individual_Q	1.0	0.05	2500000	2	True	IndivQLearningSlugsConsistentOrder/32_3_2_slugs_decentralized	slugs_decentralized	shields/general_shield	False	0.05
IndivQLearningSlugsConsistentOrder/32_3_2	slugs_centralized	shields/general_shield	True	-10		False	GridWorld	Pentagon	FullObsDiscrete	Individual_Q	1.0	0.05	2500000	2	True	IndivQLearningSlugsConsistentOrder/32_3_2_none	none			0.05
IndivQLearningSlugsConsistentOrder/33_3_3	slugs_centralized	shields/general_shield	True	-10		False	GridWorld	Pentagon	FullObsDiscrete	Individual_Q	1.0	0.05	2500000	3	True	IndivQLearningSlugsConsistentOrder/33_3_3_slugs_centralized	slugs_centralized	shields/general_shield		0.05
IndivQLearningSlugsConsistentOrder/33_3_3	slugs_centralized	shields/general_shield	True	-10		False	GridWorld	Pentagon	FullObsDiscrete	Individual_Q	1.0	0.05	2500000	3	True	IndivQLearningSlugsConsistentOrder/33_3_3_slugs_decentralized	slugs_decentralized	shields/general_shield	False	0.05
IndivQLearningSlugsConsistentOrder/33_3_3	slugs_centralized	shields/general_shield	True	-10		False	GridWorld	Pentagon	FullObsDiscrete	Individual_Q	1.0	0.05	2500000	3	True	IndivQLearningSlugsConsistentOrder/33_3_3_none	none			0.05
IndivQLearningSlugsConsistentOrder/34_3_4	slugs_centralized	shields/general_shield	True	-10		False	GridWorld	Pentagon	FullObsDiscrete	Individual_Q	1.0	0.05	2500000	4	True	IndivQLearningSlugsConsistentOrder/34_3_4_slugs_centralized	slugs_centralized	shields/general_shield		0.05
IndivQLearningSlugsConsistentOrder/34_3_4	slugs_centralized	shields/general_shield	True	-10		False	GridWorld	Pentagon	FullObsDiscrete	Individual_Q	1.0	0.05	2500000	4	True	IndivQLearningSlugsConsistentOrder/34_3_4_slugs_decentralized	slugs_decentralized	shields/general_shield	False	0.05
IndivQLearningSlugsConsistentOrder/34_3_4	slugs_centralized	shields/general_shield	True	-10		False	GridWorld	Pentagon	FullObsDiscrete	Individual_Q	1.0	0.05	2500000	4	True	IndivQLearningSlugsConsistentOrder/34_3_4_none	none			0.05
IndivQLearningSlugsConsistentOrder/35_3_5	slugs_centralized	shields/general_shield	True	-10		False	GridWorld	Pentagon	FullObsDiscrete	Individual_Q	1.0	0.05	2500000	5	True	IndivQLearningSlugsConsistentOrder/35_3_5_slugs_centralized	slugs_centralized	shields/general_shield		0.05
IndivQLearningSlugsConsistentOrder/35_3_5	slugs_centralized	shields/general_shield	True	-10		False	GridWorld	Pentagon	FullObsDiscrete	Individual_Q	1.0	0.05	2500000	5	True	IndivQLearningSlugsConsistentOrder/35_3_5_slugs_decentralized	slugs_decentralized	shields/general_shield	False	0.05
IndivQLearningSlugsConsistentOrder/35_3_5	slugs_centralized	shields/general_shield	True	-10		False	GridWorld	Pentagon	FullObsDiscrete	Individual_Q	1.0	0.05	2500000	5	True	IndivQLearningSlugsConsistentOrder/35_3_5_none	none			0.05
IndivQLearningSlugsConsistentOrder/36_3_6	slugs_centralized	shields/general_shield	True	-10		False	GridWorld	Pentagon	FullObsDiscrete	Individual_Q	1.0	0.05	2500000	6	True	IndivQLearningSlugsConsistentOrder/36_3_6_slugs_centralized	slugs_centralized	shields/general_shield		0.05
IndivQLearningSlugsConsistentOrder/36_3_6	slugs_centralized	shields/general_shield	True	-10		False	GridWorld	Pentagon	FullObsDiscrete	Individual_Q	1.0	0.05	2500000	6	True	IndivQLearningSlugsConsistentOrder/36_3_6_slugs_decentralized	slugs_decentralized	shields/general_shield	False	0.05
IndivQLearningSlugsConsistentOrder/36_3_6	slugs_centralized	shields/general_shield	True	-10		False	GridWorld	Pentagon	FullObsDiscrete	Individual_Q	1.0	0.05	2500000	6	True	IndivQLearningSlugsConsistentOrder/36_3_6_none	none			0.05
IndivQLearningSlugsConsistentOrder/37_3_7	slugs_centralized	shields/general_shield	True	-10		False	GridWorld	Pentagon	FullObsDiscrete	Individual_Q	1.0	0.05	2500000	7	True	IndivQLearningSlugsConsistentOrder/37_3_7_slugs_centralized	slugs_centralized	shields/general_shield		0.05
IndivQLearningSlugsConsistentOrder/37_3_7	slugs_centralized	shields/general_shield	True	-10		False	GridWorld	Pentagon	FullObsDiscrete	Individual_Q	1.0	0.05	2500000	7	True	IndivQLearningSlugsConsistentOrder/37_3_7_slugs_decentralized	slugs_decentralized	shields/general_shield	False	0.05
IndivQLearningSlugsConsistentOrder/37_3_7	slugs_centralized	shields/general_shield	True	-10		False	GridWorld	Pentagon	FullObsDiscrete	Individual_Q	1.0	0.05	2500000	7	True	IndivQLearningSlugsConsistentOrder/37_3_7_none	none			0.05
IndivQLearningSlugsConsistentOrder/38_3_8	slugs_centralized	shields/general_shield	True	-10		False	GridWorld	Pentagon	FullObsDiscrete	Individual_Q	1.0	0.05	2500000	8	True	IndivQLearningSlugsConsistentOrder/38_3_8_slugs_centralized	slugs_centralized	shields/general_shield		0.05
IndivQLearningSlugsConsistentOrder/38_3_8	slugs_centralized	shields/general_shield	True	-10		False	GridWorld	Pentagon	FullObsDiscrete	Individual_Q	1.0	0.05	2500000	8	True	IndivQLearningSlugsConsistentOrder/38_3_8_slugs_decentralized	slugs_decentralized	shields/general_shield	False	0.05
IndivQLearningSlugsConsistentOrder/38_3_8	slugs_centralized	shields/general_shield	True	-10		False	GridWorld	Pentagon	FullObsDiscrete	Individual_Q	1.0	0.05	2500000	8	True	IndivQLearningSlugsConsistentOrder/38_3_8_none	none			0.05
IndivQLearningSlugsConsistentOrder/39_3_9	slugs_centralized	shields/general_shield	True	-10		False	GridWorld	Pentagon	FullObsDiscrete	Individual_Q	1.0	0.05	2500000	9	True	IndivQLearningSlugsConsistentOrder/39_3_9_slugs_centralized	slugs_centralized	shields/general_shield		0.05
IndivQLearningSlugsConsistentOrder/39_3_9	slugs_centralized	shields/general_shield	True	-10		False	GridWorld	Pentagon	FullObsDiscrete	Individual_Q	1.0	0.05	2500000	9	True	IndivQLearningSlugsConsistentOrder/39_3_9_slugs_decentralized	slugs_decentralized	shields/general_shield	False	0.05
IndivQLearningSlugsConsistentOrder/39_3_9	slugs_centralized	shields/general_shield	True	-10		False	GridWorld	Pentagon	FullObsDiscrete	Individual_Q	1.0	0.05	2500000	9	True	IndivQLearningSlugsConsistentOrder/39_3_9_none	none			0.05
IndivQLearningSlugsConsistentOrder/40_4_0	slugs_decentralized	shields/general_shield	True	-10	False	False	GridWorld	Pentagon	FullObsDiscrete	Individual_Q	1.0	0.05	2500000	0	True	IndivQLearningSlugsConsistentOrder/40_4_0_slugs_centralized	slugs_centralized	shields/general_shield		0.05
IndivQLearningSlugsConsistentOrder/40_4_0	slugs_decentralized	shields/general_shield	True	-10	False	False	GridWorld	Pentagon	FullObsDiscrete	Individual_Q	1.0	0.05	2500000	0	True	IndivQLearningSlugsConsistentOrder/40_4_0_slugs_decentralized	slugs_decentralized	shields/general_shield	False	0.05
IndivQLearningSlugsConsistentOrder/40_4_0	slugs_decentralized	shields/general_shield	True	-10	False	False	GridWorld	Pentagon	FullObsDiscrete	Individual_Q	1.0	0.05	2500000	0	True	IndivQLearningSlugsConsistentOrder/40_4_0_none	none			0.05
IndivQLearningSlugsConsistentOrder/41_4_1	slugs_decentralized	shields/general_shield	True	-10	False	False	GridWorld	Pentagon	FullObsDiscrete	Individual_Q	1.0	0.05	2500000	1	True	IndivQLearningSlugsConsistentOrder/41_4_1_slugs_centralized	slugs_centralized	shields/general_shield		0.05
IndivQLearningSlugsConsistentOrder/41_4_1	slugs_decentralized	shields/general_shield	True	-10	False	False	GridWorld	Pentagon	FullObsDiscrete	Individual_Q	1.0	0.05	2500000	1	True	IndivQLearningSlugsConsistentOrder/41_4_1_slugs_decentralized	slugs_decentralized	shields/general_shield	False	0.05
IndivQLearningSlugsConsistentOrder/41_4_1	slugs_decentralized	shields/general_shield	True	-10	False	False	GridWorld	Pentagon	FullObsDiscrete	Individual_Q	1.0	0.05	2500000	1	True	IndivQLearningSlugsConsistentOrder/41_4_1_none	none			0.05
IndivQLearningSlugsConsistentOrder/42_4_2	slugs_decentralized	shields/general_shield	True	-10	False	False	GridWorld	Pentagon	FullObsDiscrete	Individual_Q	1.0	0.05	2500000	2	True	IndivQLearningSlugsConsistentOrder/42_4_2_slugs_centralized	slugs_centralized	shields/general_shield		0.05
IndivQLearningSlugsConsistentOrder/42_4_2	slugs_decentralized	shields/general_shield	True	-10	False	False	GridWorld	Pentagon	FullObsDiscrete	Individual_Q	1.0	0.05	2500000	2	True	IndivQLearningSlugsConsistentOrder/42_4_2_slugs_decentralized	slugs_decentralized	shields/general_shield	False	0.05
IndivQLearningSlugsConsistentOrder/42_4_2	slugs_decentralized	shields/general_shield	True	-10	False	False	GridWorld	Pentagon	FullObsDiscrete	Individual_Q	1.0	0.05	2500000	2	True	IndivQLearningSlugsConsistentOrder/42_4_2_none	none			0.05
IndivQLearningSlugsConsistentOrder/43_4_3	slugs_decentralized	shields/general_shield	True	-10	False	False	GridWorld	Pentagon	FullObsDiscrete	Individual_Q	1.0	0.05	2500000	3	True	IndivQLearningSlugsConsistentOrder/43_4_3_slugs_centralized	slugs_centralized	shields/general_shield		0.05
IndivQLearningSlugsConsistentOrder/43_4_3	slugs_decentralized	shields/general_shield	True	-10	False	False	GridWorld	Pentagon	FullObsDiscrete	Individual_Q	1.0	0.05	2500000	3	True	IndivQLearningSlugsConsistentOrder/43_4_3_slugs_decentralized	slugs_decentralized	shields/general_shield	False	0.05
IndivQLearningSlugsConsistentOrder/43_4_3	slugs_decentralized	shields/general_shield	True	-10	False	False	GridWorld	Pentagon	FullObsDiscrete	Individual_Q	1.0	0.05	2500000	3	True	IndivQLearningSlugsConsistentOrder/43_4_3_none	none			0.05
IndivQLearningSlugsConsistentOrder/44_4_4	slugs_decentralized	shields/general_shield	True	-10	False	False	GridWorld	Pentagon	FullObsDiscrete	Individual_Q	1.0	0.05	2500000	4	True	IndivQLearningSlugsConsistentOrder/44_4_4_slugs_centralized	slugs_centralized	shields/general_shield		0.05
IndivQLearningSlugsConsistentOrder/44_4_4	slugs_decentralized	shields/general_shield	True	-10	False	False	GridWorld	Pentagon	FullObsDiscrete	Individual_Q	1.0	0.05	2500000	4	True	IndivQLearningSlugsConsistentOrder/44_4_4_slugs_decentralized	slugs_decentralized	shields/general_shield	False	0.05
IndivQLearningSlugsConsistentOrder/44_4_4	slugs_decentralized	shields/general_shield	True	-10	False	False	GridWorld	Pentagon	FullObsDiscrete	Individual_Q	1.0	0.05	2500000	4	True	IndivQLearningSlugsConsistentOrder/44_4_4_none	none			0.05
IndivQLearningSlugsConsistentOrder/45_4_5	slugs_decentralized	shields/general_shield	True	-10	False	False	GridWorld	Pentagon	FullObsDiscrete	Individual_Q	1.0	0.05	2500000	5	True	IndivQLearningSlugsConsistentOrder/45_4_5_slugs_centralized	slugs_centralized	shields/general_shield		0.05
IndivQLearningSlugsConsistentOrder/45_4_5	slugs_decentralized	shields/general_shield	True	-10	False	False	GridWorld	Pentagon	FullObsDiscrete	Individual_Q	1.0	0.05	2500000	5	True	IndivQLearningSlugsConsistentOrder/45_4_5_slugs_decentralized	slugs_decentralized	shields/general_shield	False	0.05
IndivQLearningSlugsConsistentOrder/45_4_5	slugs_decentralized	shields/general_shield	True	-10	False	False	GridWorld	Pentagon	FullObsDiscrete	Individual_Q	1.0	0.05	2500000	5	True	IndivQLearningSlugsConsistentOrder/45_4_5_none	none			0.05
IndivQLearningSlugsConsistentOrder/46_4_6	slugs_decentralized	shields/general_shield	True	-10	False	False	GridWorld	Pentagon	FullObsDiscrete	Individual_Q	1.0	0.05	2500000	6	True	IndivQLearningSlugsConsistentOrder/46_4_6_slugs_centralized	slugs_centralized	shields/general_shield		0.05
IndivQLearningSlugsConsistentOrder/46_4_6	slugs_decentralized	shields/general_shield	True	-10	False	False	GridWorld	Pentagon	FullObsDiscrete	Individual_Q	1.0	0.05	2500000	6	True	IndivQLearningSlugsConsistentOrder/46_4_6_slugs_decentralized	slugs_decentralized	shields/general_shield	False	0.05
IndivQLearningSlugsConsistentOrder/46_4_6	slugs_decentralized	shields/general_shield	True	-10	False	False	GridWorld	Pentagon	FullObsDiscrete	Individual_Q	1.0	0.05	2500000	6	True	IndivQLearningSlugsConsistentOrder/46_4_6_none	none			0.05
IndivQLearningSlugsConsistentOrder/47_4_7	slugs_decentralized	shields/general_shield	True	-10	False	False	GridWorld	Pentagon	FullObsDiscrete	Individual_Q	1.0	0.05	2500000	7	True	IndivQLearningSlugsConsistentOrder/47_4_7_slugs_centralized	slugs_centralized	shields/general_shield		0.05
IndivQLearningSlugsConsistentOrder/47_4_7	slugs_decentralized	shields/general_shield	True	-10	False	False	GridWorld	Pentagon	FullObsDiscrete	Individual_Q	1.0	0.05	2500000	7	True	IndivQLearningSlugsConsistentOrder/47_4_7_slugs_decentralized	slugs_decentralized	shields/general_shield	False	0.05
IndivQLearningSlugsConsistentOrder/47_4_7	slugs_decentralized	shields/general_shield	True	-10	False	False	GridWorld	Pentagon	FullObsDiscrete	Individual_Q	1.0	0.05	2500000	7	True	IndivQLearningSlugsConsistentOrder/47_4_7_none	none			0.05
IndivQLearningSlugsConsistentOrder/48_4_8	slugs_decentralized	shields/general_shield	True	-10	False	False	GridWorld	Pentagon	FullObsDiscrete	Individual_Q	1.0	0.05	2500000	8	True	IndivQLearningSlugsConsistentOrder/48_4_8_slugs_centralized	slugs_centralized	shields/general_shield		0.05
IndivQLearningSlugsConsistentOrder/48_4_8	slugs_decentralized	shields/general_shield	True	-10	False	False	GridWorld	Pentagon	FullObsDiscrete	Individual_Q	1.0	0.05	2500000	8	True	IndivQLearningSlugsConsistentOrder/48_4_8_slugs_decentralized	slugs_decentralized	shields/general_shield	False	0.05
IndivQLearningSlugsConsistentOrder/48_4_8	slugs_decentralized	shields/general_shield	True	-10	False	False	GridWorld	Pentagon	FullObsDiscrete	Individual_Q	1.0	0.05	2500000	8	True	IndivQLearningSlugsConsistentOrder/48_4_8_none	none			0.05
IndivQLearningSlugsConsistentOrder/49_4_9	slugs_decentralized	shields/general_shield	True	-10	False	False	GridWorld	Pentagon	FullObsDiscrete	Individual_Q	1.0	0.05	2500000	9	True	IndivQLearningSlugsConsistentOrder/49_4_9_slugs_centralized	slugs_centralized	shields/general_shield		0.05
IndivQLearningSlugsConsistentOrder/49_4_9	slugs_decentralized	shields/general_shield	True	-10	False	False	GridWorld	Pentagon	FullObsDiscrete	Individual_Q	1.0	0.05	2500000	9	True	IndivQLearningSlugsConsistentOrder/49_4_9_slugs_decentralized	slugs_decentralized	shields/general_shield	False	0.05
IndivQLearningSlugsConsistentOrder/49_4_9	slugs_decentralized	shields/general_shield	True	-10	False	False	GridWorld	Pentagon	FullObsDiscrete	Individual_Q	1.0	0.05	2500000	9	True	IndivQLearningSlugsConsistentOrder/49_4_9_none	none			0.05
IndivQLearningSlugsConsistentOrder/50_5_0	none		True	-10		False	GridWorld	Pentagon	FullObsDiscrete	Individual_Q	1.0	0.05	2500000	0	True	IndivQLearningSlugsConsistentOrder/50_5_0_slugs_centralized	slugs_centralized	shields/general_shield		0.05
IndivQLearningSlugsConsistentOrder/50_5_0	none		True	-10		False	GridWorld	Pentagon	FullObsDiscrete	Individual_Q	1.0	0.05	2500000	0	True	IndivQLearningSlugsConsistentOrder/50_5_0_slugs_decentralized	slugs_decentralized	shields/general_shield	False	0.05
IndivQLearningSlugsConsistentOrder/50_5_0	none		True	-10		False	GridWorld	Pentagon	FullObsDiscrete	Individual_Q	1.0	0.05	2500000	0	True	IndivQLearningSlugsConsistentOrder/50_5_0_none	none			0.05
IndivQLearningSlugsConsistentOrder/51_5_1	none		True	-10		False	GridWorld	Pentagon	FullObsDiscrete	Individual_Q	1.0	0.05	2500000	1	True	IndivQLearningSlugsConsistentOrder/51_5_1_slugs_centralized	slugs_centralized	shields/general_shield		0.05
IndivQLearningSlugsConsistentOrder/51_5_1	none		True	-10		False	GridWorld	Pentagon	FullObsDiscrete	Individual_Q	1.0	0.05	2500000	1	True	IndivQLearningSlugsConsistentOrder/51_5_1_slugs_decentralized	slugs_decentralized	shields/general_shield	False	0.05
IndivQLearningSlugsConsistentOrder/51_5_1	none		True	-10		False	GridWorld	Pentagon	FullObsDiscrete	Individual_Q	1.0	0.05	2500000	1	True	IndivQLearningSlugsConsistentOrder/51_5_1_none	none			0.05
IndivQLearningSlugsConsistentOrder/52_5_2	none		True	-10		False	GridWorld	Pentagon	FullObsDiscrete	Individual_Q	1.0	0.05	2500000	2	True	IndivQLearningSlugsConsistentOrder/52_5_2_slugs_centralized	slugs_centralized	shields/general_shield		0.05
IndivQLearningSlugsConsistentOrder/52_5_2	none		True	-10		False	GridWorld	Pentagon	FullObsDiscrete	Individual_Q	1.0	0.05	2500000	2	True	IndivQLearningSlugsConsistentOrder/52_5_2_slugs_decentralized	slugs_decentralized	shields/general_shield	False	0.05
IndivQLearningSlugsConsistentOrder/52_5_2	none		True	-10		False	GridWorld	Pentagon	FullObsDiscrete	Individual_Q	1.0	0.05	2500000	2	True	IndivQLearningSlugsConsistentOrder/52_5_2_none	none			0.05
IndivQLearningSlugsConsistentOrder/53_5_3	none		True	-10		False	GridWorld	Pentagon	FullObsDiscrete	Individual_Q	1.0	0.05	2500000	3	True	IndivQLearningSlugsConsistentOrder/53_5_3_slugs_centralized	slugs_centralized	shields/general_shield		0.05
IndivQLearningSlugsConsistentOrder/53_5_3	none		True	-10		False	GridWorld	Pentagon	FullObsDiscrete	Individual_Q	1.0	0.05	2500000	3	True	IndivQLearningSlugsConsistentOrder/53_5_3_slugs_decentralized	slugs_decentralized	shields/general_shield	False	0.05
IndivQLearningSlugsConsistentOrder/53_5_3	none		True	-10		False	GridWorld	Pentagon	FullObsDiscrete	Individual_Q	1.0	0.05	2500000	3	True	IndivQLearningSlugsConsistentOrder/53_5_3_none	none			0.05
IndivQLearningSlugsConsistentOrder/54_5_4	none		True	-10		False	GridWorld	Pentagon	FullObsDiscrete	Individual_Q	1.0	0.05	2500000	4	True	IndivQLearningSlugsConsistentOrder/54_5_4_slugs_centralized	slugs_centralized	shields/general_shield		0.05
IndivQLearningSlugsConsistentOrder/54_5_4	none		True	-10		False	GridWorld	Pentagon	FullObsDiscrete	Individual_Q	1.0	0.05	2500000	4	True	IndivQLearningSlugsConsistentOrder/54_5_4_slugs_decentralized	slugs_decentralized	shields/general_shield	False	0.05
IndivQLearningSlugsConsistentOrder/54_5_4	none		True	-10		False	GridWorld	Pentagon	FullObsDiscrete	Individual_Q	1.0	0.05	2500000	4	True	IndivQLearningSlugsConsistentOrder/54_5_4_none	none			0.05
IndivQLearningSlugsConsistentOrder/55_5_5	none		True	-10		False	GridWorld	Pentagon	FullObsDiscrete	Individual_Q	1.0	0.05	2500000	5	True	IndivQLearningSlugsConsistentOrder/55_5_5_slugs_centralized	slugs_centralized	shields/general_shield		0.05
IndivQLearningSlugsConsistentOrder/55_5_5	none		True	-10		False	GridWorld	Pentagon	FullObsDiscrete	Individual_Q	1.0	0.05	2500000	5	True	IndivQLearningSlugsConsistentOrder/55_5_5_slugs_decentralized	slugs_decentralized	shields/general_shield	False	0.05
IndivQLearningSlugsConsistentOrder/55_5_5	none		True	-10		False	GridWorld	Pentagon	FullObsDiscrete	Individual_Q	1.0	0.05	2500000	5	True	IndivQLearningSlugsConsistentOrder/55_5_5_none	none			0.05
IndivQLearningSlugsConsistentOrder/56_5_6	none		True	-10		False	GridWorld	Pentagon	FullObsDiscrete	Individual_Q	1.0	0.05	2500000	6	True	IndivQLearningSlugsConsistentOrder/56_5_6_slugs_centralized	slugs_centralized	shields/general_shield		0.05
IndivQLearningSlugsConsistentOrder/56_5_6	none		True	-10		False	GridWorld	Pentagon	FullObsDiscrete	Individual_Q	1.0	0.05	2500000	6	True	IndivQLearningSlugsConsistentOrder/56_5_6_slugs_decentralized	slugs_decentralized	shields/general_shield	False	0.05
IndivQLearningSlugsConsistentOrder/56_5_6	none		True	-10		False	GridWorld	Pentagon	FullObsDiscrete	Individual_Q	1.0	0.05	2500000	6	True	IndivQLearningSlugsConsistentOrder/56_5_6_none	none			0.05
IndivQLearningSlugsConsistentOrder/57_5_7	none		True	-10		False	GridWorld	Pentagon	FullObsDiscrete	Individual_Q	1.0	0.05	2500000	7	True	IndivQLearningSlugsConsistentOrder/57_5_7_slugs_centralized	slugs_centralized	shields/general_shield		0.05
IndivQLearningSlugsConsistentOrder/57_5_7	none		True	-10		False	GridWorld	Pentagon	FullObsDiscrete	Individual_Q	1.0	0.05	2500000	7	True	IndivQLearningSlugsConsistentOrder/57_5_7_slugs_decentralized	slugs_decentralized	shields/general_shield	False	0.05
IndivQLearningSlugsConsistentOrder/57_5_7	none		True	-10		False	GridWorld	Pentagon	FullObsDiscrete	Individual_Q	1.0	0.05	2500000	7	True	IndivQLearningSlugsConsistentOrder/57_5_7_none	none			0.05
IndivQLearningSlugsConsistentOrder/58_5_8	none		True	-10		False	GridWorld	Pentagon	FullObsDiscrete	Individual_Q	1.0	0.05	2500000	8	True	IndivQLearningSlugsConsistentOrder/58_5_8_slugs_centralized	slugs_centralized	shields/general_shield		0.05
IndivQLearningSlugsConsistentOrder/58_5_8	none		True	-10		False	GridWorld	Pentagon	FullObsDiscrete	Individual_Q	1.0	0.05	2500000	8	True	IndivQLearningSlugsConsistentOrder/58_5_8_slugs_decentralized	slugs_decentralized	shields/general_shield	False	0.05
IndivQLearningSlugsConsistentOrder/58_5_8	none		True	-10		False	GridWorld	Pentagon	FullObsDiscrete	Individual_Q	1.0	0.05	2500000	8	True	IndivQLearningSlugsConsistentOrder/58_5_8_none	none			0.05
IndivQLearningSlugsConsistentOrder/59_5_9	none		True	-10		False	GridWorld	Pentagon	FullObsDiscrete	Individual_Q	1.0	0.05	2500000	9	True	IndivQLearningSlugsConsistentOrder/59_5_9_slugs_centralized	slugs_centralized	shields/general_shield		0.05
IndivQLearningSlugsConsistentOrder/59_5_9	none		True	-10		False	GridWorld	Pentagon	FullObsDiscrete	Individual_Q	1.0	0.05	2500000	9	True	IndivQLearningSlugsConsistentOrder/59_5_9_slugs_decentralized	slugs_decentralized	shields/general_shield	False	0.05
IndivQLearningSlugsConsistentOrder/59_5_9	none		True	-10		False	GridWorld	Pentagon	FullObsDiscrete	Individual_Q	1.0	0.05	2500000	9	True	IndivQLearningSlugsConsistentOrder/59_5_9_none	none			0.05
IndivQLearningSlugsConsistentOrder/60_6_0	slugs_centralized	shields/general_shield	True	-10		True	GridWorld	ISR	FullObsDiscrete	Individual_Q	1.0	0.05	2500000	0	True	IndivQLearningSlugsConsistentOrder/60_6_0_slugs_centralized	slugs_centralized	shields/general_shield		0.05
IndivQLearningSlugsConsistentOrder/60_6_0	slugs_centralized	shields/general_shield	True	-10		True	GridWorld	ISR	FullObsDiscrete	Individual_Q	1.0	0.05	2500000	0	True	IndivQLearningSlugsConsistentOrder/60_6_0_slugs_decentralized	slugs_decentralized	shields/general_shield	False	0.05
IndivQLearningSlugsConsistentOrder/60_6_0	slugs_centralized	shields/general_shield	True	-10		True	GridWorld	ISR	FullObsDiscrete	Individual_Q	1.0	0.05	2500000	0	True	IndivQLearningSlugsConsistentOrder/60_6_0_none	none			0.05
IndivQLearningSlugsConsistentOrder/61_6_1	slugs_centralized	shields/general_shield	True	-10		True	GridWorld	ISR	FullObsDiscrete	Individual_Q	1.0	0.05	2500000	1	True	IndivQLearningSlugsConsistentOrder/61_6_1_slugs_centralized	slugs_centralized	shields/general_shield		0.05
IndivQLearningSlugsConsistentOrder/61_6_1	slugs_centralized	shields/general_shield	True	-10		True	GridWorld	ISR	FullObsDiscrete	Individual_Q	1.0	0.05	2500000	1	True	IndivQLearningSlugsConsistentOrder/61_6_1_slugs_decentralized	slugs_decentralized	shields/general_shield	False	0.05
IndivQLearningSlugsConsistentOrder/61_6_1	slugs_centralized	shields/general_shield	True	-10		True	GridWorld	ISR	FullObsDiscrete	Individual_Q	1.0	0.05	2500000	1	True	IndivQLearningSlugsConsistentOrder/61_6_1_none	none			0.05
IndivQLearningSlugsConsistentOrder/62_6_2	slugs_centralized	shields/general_shield	True	-10		True	GridWorld	ISR	FullObsDiscrete	Individual_Q	1.0	0.05	2500000	2	True	IndivQLearningSlugsConsistentOrder/62_6_2_slugs_centralized	slugs_centralized	shields/general_shield		0.05
IndivQLearningSlugsConsistentOrder/62_6_2	slugs_centralized	shields/general_shield	True	-10		True	GridWorld	ISR	FullObsDiscrete	Individual_Q	1.0	0.05	2500000	2	True	IndivQLearningSlugsConsistentOrder/62_6_2_slugs_decentralized	slugs_decentralized	shields/general_shield	False	0.05
IndivQLearningSlugsConsistentOrder/62_6_2	slugs_centralized	shields/general_shield	True	-10		True	GridWorld	ISR	FullObsDiscrete	Individual_Q	1.0	0.05	2500000	2	True	IndivQLearningSlugsConsistentOrder/62_6_2_none	none			0.05
IndivQLearningSlugsConsistentOrder/63_6_3	slugs_centralized	shields/general_shield	True	-10		True	GridWorld	ISR	FullObsDiscrete	Individual_Q	1.0	0.05	2500000	3	True	IndivQLearningSlugsConsistentOrder/63_6_3_slugs_centralized	slugs_centralized	shields/general_shield		0.05
IndivQLearningSlugsConsistentOrder/63_6_3	slugs_centralized	shields/general_shield	True	-10		True	GridWorld	ISR	FullObsDiscrete	Individual_Q	1.0	0.05	2500000	3	True	IndivQLearningSlugsConsistentOrder/63_6_3_slugs_decentralized	slugs_decentralized	shields/general_shield	False	0.05
IndivQLearningSlugsConsistentOrder/63_6_3	slugs_centralized	shields/general_shield	True	-10		True	GridWorld	ISR	FullObsDiscrete	Individual_Q	1.0	0.05	2500000	3	True	IndivQLearningSlugsConsistentOrder/63_6_3_none	none			0.05
IndivQLearningSlugsConsistentOrder/64_6_4	slugs_centralized	shields/general_shield	True	-10		True	GridWorld	ISR	FullObsDiscrete	Individual_Q	1.0	0.05	2500000	4	True	IndivQLearningSlugsConsistentOrder/64_6_4_slugs_centralized	slugs_centralized	shields/general_shield		0.05
IndivQLearningSlugsConsistentOrder/64_6_4	slugs_centralized	shields/general_shield	True	-10		True	GridWorld	ISR	FullObsDiscrete	Individual_Q	1.0	0.05	2500000	4	True	IndivQLearningSlugsConsistentOrder/64_6_4_slugs_decentralized	slugs_decentralized	shields/general_shield	False	0.05
IndivQLearningSlugsConsistentOrder/64_6_4	slugs_centralized	shields/general_shield	True	-10		True	GridWorld	ISR	FullObsDiscrete	Individual_Q	1.0	0.05	2500000	4	True	IndivQLearningSlugsConsistentOrder/64_6_4_none	none			0.05
IndivQLearningSlugsConsistentOrder/65_6_5	slugs_centralized	shields/general_shield	True	-10		True	GridWorld	ISR	FullObsDiscrete	Individual_Q	1.0	0.05	2500000	5	True	IndivQLearningSlugsConsistentOrder/65_6_5_slugs_centralized	slugs_centralized	shields/general_shield		0.05
IndivQLearningSlugsConsistentOrder/65_6_5	slugs_centralized	shields/general_shield	True	-10		True	GridWorld	ISR	FullObsDiscrete	Individual_Q	1.0	0.05	2500000	5	True	IndivQLearningSlugsConsistentOrder/65_6_5_slugs_decentralized	slugs_decentralized	shields/general_shield	False	0.05
IndivQLearningSlugsConsistentOrder/65_6_5	slugs_centralized	shields/general_shield	True	-10		True	GridWorld	ISR	FullObsDiscrete	Individual_Q	1.0	0.05	2500000	5	True	IndivQLearningSlugsConsistentOrder/65_6_5_none	none			0.05
IndivQLearningSlugsConsistentOrder/66_6_6	slugs_centralized	shields/general_shield	True	-10		True	GridWorld	ISR	FullObsDiscrete	Individual_Q	1.0	0.05	2500000	6	True	IndivQLearningSlugsConsistentOrder/66_6_6_slugs_centralized	slugs_centralized	shields/general_shield		0.05
IndivQLearningSlugsConsistentOrder/66_6_6	slugs_centralized	shields/general_shield	True	-10		True	GridWorld	ISR	FullObsDiscrete	Individual_Q	1.0	0.05	2500000	6	True	IndivQLearningSlugsConsistentOrder/66_6_6_slugs_decentralized	slugs_decentralized	shields/general_shield	False	0.05
IndivQLearningSlugsConsistentOrder/66_6_6	slugs_centralized	shields/general_shield	True	-10		True	GridWorld	ISR	FullObsDiscrete	Individual_Q	1.0	0.05	2500000	6	True	IndivQLearningSlugsConsistentOrder/66_6_6_none	none			0.05
IndivQLearningSlugsConsistentOrder/67_6_7	slugs_centralized	shields/general_shield	True	-10		True	GridWorld	ISR	FullObsDiscrete	Individual_Q	1.0	0.05	2500000	7	True	IndivQLearningSlugsConsistentOrder/67_6_7_slugs_centralized	slugs_centralized	shields/general_shield		0.05
IndivQLearningSlugsConsistentOrder/67_6_7	slugs_centralized	shields/general_shield	True	-10		True	GridWorld	ISR	FullObsDiscrete	Individual_Q	1.0	0.05	2500000	7	True	IndivQLearningSlugsConsistentOrder/67_6_7_slugs_decentralized	slugs_decentralized	shields/general_shield	False	0.05
IndivQLearningSlugsConsistentOrder/67_6_7	slugs_centralized	shields/general_shield	True	-10		True	GridWorld	ISR	FullObsDiscrete	Individual_Q	1.0	0.05	2500000	7	True	IndivQLearningSlugsConsistentOrder/67_6_7_none	none			0.05
IndivQLearningSlugsConsistentOrder/68_6_8	slugs_centralized	shields/general_shield	True	-10		True	GridWorld	ISR	FullObsDiscrete	Individual_Q	1.0	0.05	2500000	8	True	IndivQLearningSlugsConsistentOrder/68_6_8_slugs_centralized	slugs_centralized	shields/general_shield		0.05
IndivQLearningSlugsConsistentOrder/68_6_8	slugs_centralized	shields/general_shield	True	-10		True	GridWorld	ISR	FullObsDiscrete	Individual_Q	1.0	0.05	2500000	8	True	IndivQLearningSlugsConsistentOrder/68_6_8_slugs_decentralized	slugs_decentralized	shields/general_shield	False	0.05
IndivQLearningSlugsConsistentOrder/68_6_8	slugs_centralized	shields/general_shield	True	-10		True	GridWorld	ISR	FullObsDiscrete	Individual_Q	1.0	0.05	2500000	8	True	IndivQLearningSlugsConsistentOrder/68_6_8_none	none			0.05
IndivQLearningSlugsConsistentOrder/69_6_9	slugs_centralized	shields/general_shield	True	-10		True	GridWorld	ISR	FullObsDiscrete	Individual_Q	1.0	0.05	2500000	9	True	IndivQLearningSlugsConsistentOrder/69_6_9_slugs_centralized	slugs_centralized	shields/general_shield		0.05
IndivQLearningSlugsConsistentOrder/69_6_9	slugs_centralized	shields/general_shield	True	-10		True	GridWorld	ISR	FullObsDiscrete	Individual_Q	1.0	0.05	2500000	9	True	IndivQLearningSlugsConsistentOrder/69_6_9_slugs_decentralized	slugs_decentralized	shields/general_shield	False	0.05
IndivQLearningSlugsConsistentOrder/69_6_9	slugs_centralized	shields/general_shield	True	-10		True	GridWorld	ISR	FullObsDiscrete	Individual_Q	1.0	0.05	2500000	9	True	IndivQLearningSlugsConsistentOrder/69_6_9_none	none			0.05
IndivQLearningSlugsConsistentOrder/70_7_0	slugs_decentralized	shields/general_shield	True	-10	False	True	GridWorld	ISR	FullObsDiscrete	Individual_Q	1.0	0.05	2500000	0	True	IndivQLearningSlugsConsistentOrder/70_7_0_slugs_centralized	slugs_centralized	shields/general_shield		0.05
IndivQLearningSlugsConsistentOrder/70_7_0	slugs_decentralized	shields/general_shield	True	-10	False	True	GridWorld	ISR	FullObsDiscrete	Individual_Q	1.0	0.05	2500000	0	True	IndivQLearningSlugsConsistentOrder/70_7_0_slugs_decentralized	slugs_decentralized	shields/general_shield	False	0.05
IndivQLearningSlugsConsistentOrder/70_7_0	slugs_decentralized	shields/general_shield	True	-10	False	True	GridWorld	ISR	FullObsDiscrete	Individual_Q	1.0	0.05	2500000	0	True	IndivQLearningSlugsConsistentOrder/70_7_0_none	none			0.05
IndivQLearningSlugsConsistentOrder/71_7_1	slugs_decentralized	shields/general_shield	True	-10	False	True	GridWorld	ISR	FullObsDiscrete	Individual_Q	1.0	0.05	2500000	1	True	IndivQLearningSlugsConsistentOrder/71_7_1_slugs_centralized	slugs_centralized	shields/general_shield		0.05
IndivQLearningSlugsConsistentOrder/71_7_1	slugs_decentralized	shields/general_shield	True	-10	False	True	GridWorld	ISR	FullObsDiscrete	Individual_Q	1.0	0.05	2500000	1	True	IndivQLearningSlugsConsistentOrder/71_7_1_slugs_decentralized	slugs_decentralized	shields/general_shield	False	0.05
IndivQLearningSlugsConsistentOrder/71_7_1	slugs_decentralized	shields/general_shield	True	-10	False	True	GridWorld	ISR	FullObsDiscrete	Individual_Q	1.0	0.05	2500000	1	True	IndivQLearningSlugsConsistentOrder/71_7_1_none	none			0.05
IndivQLearningSlugsConsistentOrder/72_7_2	slugs_decentralized	shields/general_shield	True	-10	False	True	GridWorld	ISR	FullObsDiscrete	Individual_Q	1.0	0.05	2500000	2	True	IndivQLearningSlugsConsistentOrder/72_7_2_slugs_centralized	slugs_centralized	shields/general_shield		0.05
IndivQLearningSlugsConsistentOrder/72_7_2	slugs_decentralized	shields/general_shield	True	-10	False	True	GridWorld	ISR	FullObsDiscrete	Individual_Q	1.0	0.05	2500000	2	True	IndivQLearningSlugsConsistentOrder/72_7_2_slugs_decentralized	slugs_decentralized	shields/general_shield	False	0.05
IndivQLearningSlugsConsistentOrder/72_7_2	slugs_decentralized	shields/general_shield	True	-10	False	True	GridWorld	ISR	FullObsDiscrete	Individual_Q	1.0	0.05	2500000	2	True	IndivQLearningSlugsConsistentOrder/72_7_2_none	none			0.05
IndivQLearningSlugsConsistentOrder/73_7_3	slugs_decentralized	shields/general_shield	True	-10	False	True	GridWorld	ISR	FullObsDiscrete	Individual_Q	1.0	0.05	2500000	3	True	IndivQLearningSlugsConsistentOrder/73_7_3_slugs_centralized	slugs_centralized	shields/general_shield		0.05
IndivQLearningSlugsConsistentOrder/73_7_3	slugs_decentralized	shields/general_shield	True	-10	False	True	GridWorld	ISR	FullObsDiscrete	Individual_Q	1.0	0.05	2500000	3	True	IndivQLearningSlugsConsistentOrder/73_7_3_slugs_decentralized	slugs_decentralized	shields/general_shield	False	0.05
IndivQLearningSlugsConsistentOrder/73_7_3	slugs_decentralized	shields/general_shield	True	-10	False	True	GridWorld	ISR	FullObsDiscrete	Individual_Q	1.0	0.05	2500000	3	True	IndivQLearningSlugsConsistentOrder/73_7_3_none	none			0.05
IndivQLearningSlugsConsistentOrder/74_7_4	slugs_decentralized	shields/general_shield	True	-10	False	True	GridWorld	ISR	FullObsDiscrete	Individual_Q	1.0	0.05	2500000	4	True	IndivQLearningSlugsConsistentOrder/74_7_4_slugs_centralized	slugs_centralized	shields/general_shield		0.05
IndivQLearningSlugsConsistentOrder/74_7_4	slugs_decentralized	shields/general_shield	True	-10	False	True	GridWorld	ISR	FullObsDiscrete	Individual_Q	1.0	0.05	2500000	4	True	IndivQLearningSlugsConsistentOrder/74_7_4_slugs_decentralized	slugs_decentralized	shields/general_shield	False	0.05
IndivQLearningSlugsConsistentOrder/74_7_4	slugs_decentralized	shields/general_shield	True	-10	False	True	GridWorld	ISR	FullObsDiscrete	Individual_Q	1.0	0.05	2500000	4	True	IndivQLearningSlugsConsistentOrder/74_7_4_none	none			0.05
IndivQLearningSlugsConsistentOrder/75_7_5	slugs_decentralized	shields/general_shield	True	-10	False	True	GridWorld	ISR	FullObsDiscrete	Individual_Q	1.0	0.05	2500000	5	True	IndivQLearningSlugsConsistentOrder/75_7_5_slugs_centralized	slugs_centralized	shields/general_shield		0.05
IndivQLearningSlugsConsistentOrder/75_7_5	slugs_decentralized	shields/general_shield	True	-10	False	True	GridWorld	ISR	FullObsDiscrete	Individual_Q	1.0	0.05	2500000	5	True	IndivQLearningSlugsConsistentOrder/75_7_5_slugs_decentralized	slugs_decentralized	shields/general_shield	False	0.05
IndivQLearningSlugsConsistentOrder/75_7_5	slugs_decentralized	shields/general_shield	True	-10	False	True	GridWorld	ISR	FullObsDiscrete	Individual_Q	1.0	0.05	2500000	5	True	IndivQLearningSlugsConsistentOrder/75_7_5_none	none			0.05
IndivQLearningSlugsConsistentOrder/76_7_6	slugs_decentralized	shields/general_shield	True	-10	False	True	GridWorld	ISR	FullObsDiscrete	Individual_Q	1.0	0.05	2500000	6	True	IndivQLearningSlugsConsistentOrder/76_7_6_slugs_centralized	slugs_centralized	shields/general_shield		0.05
IndivQLearningSlugsConsistentOrder/76_7_6	slugs_decentralized	shields/general_shield	True	-10	False	True	GridWorld	ISR	FullObsDiscrete	Individual_Q	1.0	0.05	2500000	6	True	IndivQLearningSlugsConsistentOrder/76_7_6_slugs_decentralized	slugs_decentralized	shields/general_shield	False	0.05
IndivQLearningSlugsConsistentOrder/76_7_6	slugs_decentralized	shields/general_shield	True	-10	False	True	GridWorld	ISR	FullObsDiscrete	Individual_Q	1.0	0.05	2500000	6	True	IndivQLearningSlugsConsistentOrder/76_7_6_none	none			0.05
IndivQLearningSlugsConsistentOrder/77_7_7	slugs_decentralized	shields/general_shield	True	-10	False	True	GridWorld	ISR	FullObsDiscrete	Individual_Q	1.0	0.05	2500000	7	True	IndivQLearningSlugsConsistentOrder/77_7_7_slugs_centralized	slugs_centralized	shields/general_shield		0.05
IndivQLearningSlugsConsistentOrder/77_7_7	slugs_decentralized	shields/general_shield	True	-10	False	True	GridWorld	ISR	FullObsDiscrete	Individual_Q	1.0	0.05	2500000	7	True	IndivQLearningSlugsConsistentOrder/77_7_7_slugs_decentralized	slugs_decentralized	shields/general_shield	False	0.05
IndivQLearningSlugsConsistentOrder/77_7_7	slugs_decentralized	shields/general_shield	True	-10	False	True	GridWorld	ISR	FullObsDiscrete	Individual_Q	1.0	0.05	2500000	7	True	IndivQLearningSlugsConsistentOrder/77_7_7_none	none			0.05
IndivQLearningSlugsConsistentOrder/78_7_8	slugs_decentralized	shields/general_shield	True	-10	False	True	GridWorld	ISR	FullObsDiscrete	Individual_Q	1.0	0.05	2500000	8	True	IndivQLearningSlugsConsistentOrder/78_7_8_slugs_centralized	slugs_centralized	shields/general_shield		0.05
IndivQLearningSlugsConsistentOrder/78_7_8	slugs_decentralized	shields/general_shield	True	-10	False	True	GridWorld	ISR	FullObsDiscrete	Individual_Q	1.0	0.05	2500000	8	True	IndivQLearningSlugsConsistentOrder/78_7_8_slugs_decentralized	slugs_decentralized	shields/general_shield	False	0.05
IndivQLearningSlugsConsistentOrder/78_7_8	slugs_decentralized	shields/general_shield	True	-10	False	True	GridWorld	ISR	FullObsDiscrete	Individual_Q	1.0	0.05	2500000	8	True	IndivQLearningSlugsConsistentOrder/78_7_8_none	none			0.05
IndivQLearningSlugsConsistentOrder/79_7_9	slugs_decentralized	shields/general_shield	True	-10	False	True	GridWorld	ISR	FullObsDiscrete	Individual_Q	1.0	0.05	2500000	9	True	IndivQLearningSlugsConsistentOrder/79_7_9_slugs_centralized	slugs_centralized	shields/general_shield		0.05
IndivQLearningSlugsConsistentOrder/79_7_9	slugs_decentralized	shields/general_shield	True	-10	False	True	GridWorld	ISR	FullObsDiscrete	Individual_Q	1.0	0.05	2500000	9	True	IndivQLearningSlugsConsistentOrder/79_7_9_slugs_decentralized	slugs_decentralized	shields/general_shield	False	0.05
IndivQLearningSlugsConsistentOrder/79_7_9	slugs_decentralized	shields/general_shield	True	-10	False	True	GridWorld	ISR	FullObsDiscrete	Individual_Q	1.0	0.05	2500000	9	True	IndivQLearningSlugsConsistentOrder/79_7_9_none	none			0.05
IndivQLearningSlugsConsistentOrder/80_8_0	none		True	-10		True	GridWorld	ISR	FullObsDiscrete	Individual_Q	1.0	0.05	2500000	0	True	IndivQLearningSlugsConsistentOrder/80_8_0_slugs_centralized	slugs_centralized	shields/general_shield		0.05
IndivQLearningSlugsConsistentOrder/80_8_0	none		True	-10		True	GridWorld	ISR	FullObsDiscrete	Individual_Q	1.0	0.05	2500000	0	True	IndivQLearningSlugsConsistentOrder/80_8_0_slugs_decentralized	slugs_decentralized	shields/general_shield	False	0.05
IndivQLearningSlugsConsistentOrder/80_8_0	none		True	-10		True	GridWorld	ISR	FullObsDiscrete	Individual_Q	1.0	0.05	2500000	0	True	IndivQLearningSlugsConsistentOrder/80_8_0_none	none			0.05
IndivQLearningSlugsConsistentOrder/81_8_1	none		True	-10		True	GridWorld	ISR	FullObsDiscrete	Individual_Q	1.0	0.05	2500000	1	True	IndivQLearningSlugsConsistentOrder/81_8_1_slugs_centralized	slugs_centralized	shields/general_shield		0.05
IndivQLearningSlugsConsistentOrder/81_8_1	none		True	-10		True	GridWorld	ISR	FullObsDiscrete	Individual_Q	1.0	0.05	2500000	1	True	IndivQLearningSlugsConsistentOrder/81_8_1_slugs_decentralized	slugs_decentralized	shields/general_shield	False	0.05
IndivQLearningSlugsConsistentOrder/81_8_1	none		True	-10		True	GridWorld	ISR	FullObsDiscrete	Individual_Q	1.0	0.05	2500000	1	True	IndivQLearningSlugsConsistentOrder/81_8_1_none	none			0.05
IndivQLearningSlugsConsistentOrder/82_8_2	none		True	-10		True	GridWorld	ISR	FullObsDiscrete	Individual_Q	1.0	0.05	2500000	2	True	IndivQLearningSlugsConsistentOrder/82_8_2_slugs_centralized	slugs_centralized	shields/general_shield		0.05
IndivQLearningSlugsConsistentOrder/82_8_2	none		True	-10		True	GridWorld	ISR	FullObsDiscrete	Individual_Q	1.0	0.05	2500000	2	True	IndivQLearningSlugsConsistentOrder/82_8_2_slugs_decentralized	slugs_decentralized	shields/general_shield	False	0.05
IndivQLearningSlugsConsistentOrder/82_8_2	none		True	-10		True	GridWorld	ISR	FullObsDiscrete	Individual_Q	1.0	0.05	2500000	2	True	IndivQLearningSlugsConsistentOrder/82_8_2_none	none			0.05
IndivQLearningSlugsConsistentOrder/83_8_3	none		True	-10		True	GridWorld	ISR	FullObsDiscrete	Individual_Q	1.0	0.05	2500000	3	True	IndivQLearningSlugsConsistentOrder/83_8_3_slugs_centralized	slugs_centralized	shields/general_shield		0.05
IndivQLearningSlugsConsistentOrder/83_8_3	none		True	-10		True	GridWorld	ISR	FullObsDiscrete	Individual_Q	1.0	0.05	2500000	3	True	IndivQLearningSlugsConsistentOrder/83_8_3_slugs_decentralized	slugs_decentralized	shields/general_shield	False	0.05
IndivQLearningSlugsConsistentOrder/83_8_3	none		True	-10		True	GridWorld	ISR	FullObsDiscrete	Individual_Q	1.0	0.05	2500000	3	True	IndivQLearningSlugsConsistentOrder/83_8_3_none	none			0.05
IndivQLearningSlugsConsistentOrder/84_8_4	none		True	-10		True	GridWorld	ISR	FullObsDiscrete	Individual_Q	1.0	0.05	2500000	4	True	IndivQLearningSlugsConsistentOrder/84_8_4_slugs_centralized	slugs_centralized	shields/general_shield		0.05
IndivQLearningSlugsConsistentOrder/84_8_4	none		True	-10		True	GridWorld	ISR	FullObsDiscrete	Individual_Q	1.0	0.05	2500000	4	True	IndivQLearningSlugsConsistentOrder/84_8_4_slugs_decentralized	slugs_decentralized	shields/general_shield	False	0.05
IndivQLearningSlugsConsistentOrder/84_8_4	none		True	-10		True	GridWorld	ISR	FullObsDiscrete	Individual_Q	1.0	0.05	2500000	4	True	IndivQLearningSlugsConsistentOrder/84_8_4_none	none			0.05
IndivQLearningSlugsConsistentOrder/85_8_5	none		True	-10		True	GridWorld	ISR	FullObsDiscrete	Individual_Q	1.0	0.05	2500000	5	True	IndivQLearningSlugsConsistentOrder/85_8_5_slugs_centralized	slugs_centralized	shields/general_shield		0.05
IndivQLearningSlugsConsistentOrder/85_8_5	none		True	-10		True	GridWorld	ISR	FullObsDiscrete	Individual_Q	1.0	0.05	2500000	5	True	IndivQLearningSlugsConsistentOrder/85_8_5_slugs_decentralized	slugs_decentralized	shields/general_shield	False	0.05
IndivQLearningSlugsConsistentOrder/85_8_5	none		True	-10		True	GridWorld	ISR	FullObsDiscrete	Individual_Q	1.0	0.05	2500000	5	True	IndivQLearningSlugsConsistentOrder/85_8_5_none	none			0.05
IndivQLearningSlugsConsistentOrder/86_8_6	none		True	-10		True	GridWorld	ISR	FullObsDiscrete	Individual_Q	1.0	0.05	2500000	6	True	IndivQLearningSlugsConsistentOrder/86_8_6_slugs_centralized	slugs_centralized	shields/general_shield		0.05
IndivQLearningSlugsConsistentOrder/86_8_6	none		True	-10		True	GridWorld	ISR	FullObsDiscrete	Individual_Q	1.0	0.05	2500000	6	True	IndivQLearningSlugsConsistentOrder/86_8_6_slugs_decentralized	slugs_decentralized	shields/general_shield	False	0.05
IndivQLearningSlugsConsistentOrder/86_8_6	none		True	-10		True	GridWorld	ISR	FullObsDiscrete	Individual_Q	1.0	0.05	2500000	6	True	IndivQLearningSlugsConsistentOrder/86_8_6_none	none			0.05
IndivQLearningSlugsConsistentOrder/87_8_7	none		True	-10		True	GridWorld	ISR	FullObsDiscrete	Individual_Q	1.0	0.05	2500000	7	True	IndivQLearningSlugsConsistentOrder/87_8_7_slugs_centralized	slugs_centralized	shields/general_shield		0.05
IndivQLearningSlugsConsistentOrder/87_8_7	none		True	-10		True	GridWorld	ISR	FullObsDiscrete	Individual_Q	1.0	0.05	2500000	7	True	IndivQLearningSlugsConsistentOrder/87_8_7_slugs_decentralized	slugs_decentralized	shields/general_shield	False	0.05
IndivQLearningSlugsConsistentOrder/87_8_7	none		True	-10		True	GridWorld	ISR	FullObsDiscrete	Individual_Q	1.0	0.05	2500000	7	True	IndivQLearningSlugsConsistentOrder/87_8_7_none	none			0.05
IndivQLearningSlugsConsistentOrder/88_8_8	none		True	-10		True	GridWorld	ISR	FullObsDiscrete	Individual_Q	1.0	0.05	2500000	8	True	IndivQLearningSlugsConsistentOrder/88_8_8_slugs_centralized	slugs_centralized	shields/general_shield		0.05
IndivQLearningSlugsConsistentOrder/88_8_8	none		True	-10		True	GridWorld	ISR	FullObsDiscrete	Individual_Q	1.0	0.05	2500000	8	True	IndivQLearningSlugsConsistentOrder/88_8_8_slugs_decentralized	slugs_decentralized	shields/general_shield	False	0.05
IndivQLearningSlugsConsistentOrder/88_8_8	none		True	-10		True	GridWorld	ISR	FullObsDiscrete	Individual_Q	1.0	0.05	2500000	8	True	IndivQLearningSlugsConsistentOrder/88_8_8_none	none			0.05
IndivQLearningSlugsConsistentOrder/89_8_9	none		True	-10		True	GridWorld	ISR	FullObsDiscrete	Individual_Q	1.0	0.05	2500000	9	True	IndivQLearningSlugsConsistentOrder/89_8_9_slugs_centralized	slugs_centralized	shields/general_shield		0.05
IndivQLearningSlugsConsistentOrder/89_8_9	none		True	-10		True	GridWorld	ISR	FullObsDiscrete	Individual_Q	1.0	0.05	2500000	9	True	IndivQLearningSlugsConsistentOrder/89_8_9_slugs_decentralized	slugs_decentralized	shields/general_shield	False	0.05
IndivQLearningSlugsConsistentOrder/89_8_9	none		True	-10		True	GridWorld	ISR	FullObsDiscrete	Individual_Q	1.0	0.05	2500000	9	True	IndivQLearningSlugsConsistentOrder/89_8_9_none	none			0.05
IndivQLearningSlugsConsistentOrder/90_9_0	slugs_centralized	shields/general_shield	True	-10		False	GridWorld	ISR	FullObsDiscrete	Individual_Q	1.0	0.05	2500000	0	True	IndivQLearningSlugsConsistentOrder/90_9_0_slugs_centralized	slugs_centralized	shields/general_shield		0.05
IndivQLearningSlugsConsistentOrder/90_9_0	slugs_centralized	shields/general_shield	True	-10		False	GridWorld	ISR	FullObsDiscrete	Individual_Q	1.0	0.05	2500000	0	True	IndivQLearningSlugsConsistentOrder/90_9_0_slugs_decentralized	slugs_decentralized	shields/general_shield	False	0.05
IndivQLearningSlugsConsistentOrder/90_9_0	slugs_centralized	shields/general_shield	True	-10		False	GridWorld	ISR	FullObsDiscrete	Individual_Q	1.0	0.05	2500000	0	True	IndivQLearningSlugsConsistentOrder/90_9_0_none	none			0.05
IndivQLearningSlugsConsistentOrder/91_9_1	slugs_centralized	shields/general_shield	True	-10		False	GridWorld	ISR	FullObsDiscrete	Individual_Q	1.0	0.05	2500000	1	True	IndivQLearningSlugsConsistentOrder/91_9_1_slugs_centralized	slugs_centralized	shields/general_shield		0.05
IndivQLearningSlugsConsistentOrder/91_9_1	slugs_centralized	shields/general_shield	True	-10		False	GridWorld	ISR	FullObsDiscrete	Individual_Q	1.0	0.05	2500000	1	True	IndivQLearningSlugsConsistentOrder/91_9_1_slugs_decentralized	slugs_decentralized	shields/general_shield	False	0.05
IndivQLearningSlugsConsistentOrder/91_9_1	slugs_centralized	shields/general_shield	True	-10		False	GridWorld	ISR	FullObsDiscrete	Individual_Q	1.0	0.05	2500000	1	True	IndivQLearningSlugsConsistentOrder/91_9_1_none	none			0.05
IndivQLearningSlugsConsistentOrder/92_9_2	slugs_centralized	shields/general_shield	True	-10		False	GridWorld	ISR	FullObsDiscrete	Individual_Q	1.0	0.05	2500000	2	True	IndivQLearningSlugsConsistentOrder/92_9_2_slugs_centralized	slugs_centralized	shields/general_shield		0.05
IndivQLearningSlugsConsistentOrder/92_9_2	slugs_centralized	shields/general_shield	True	-10		False	GridWorld	ISR	FullObsDiscrete	Individual_Q	1.0	0.05	2500000	2	True	IndivQLearningSlugsConsistentOrder/92_9_2_slugs_decentralized	slugs_decentralized	shields/general_shield	False	0.05
IndivQLearningSlugsConsistentOrder/92_9_2	slugs_centralized	shields/general_shield	True	-10		False	GridWorld	ISR	FullObsDiscrete	Individual_Q	1.0	0.05	2500000	2	True	IndivQLearningSlugsConsistentOrder/92_9_2_none	none			0.05
IndivQLearningSlugsConsistentOrder/93_9_3	slugs_centralized	shields/general_shield	True	-10		False	GridWorld	ISR	FullObsDiscrete	Individual_Q	1.0	0.05	2500000	3	True	IndivQLearningSlugsConsistentOrder/93_9_3_slugs_centralized	slugs_centralized	shields/general_shield		0.05
IndivQLearningSlugsConsistentOrder/93_9_3	slugs_centralized	shields/general_shield	True	-10		False	GridWorld	ISR	FullObsDiscrete	Individual_Q	1.0	0.05	2500000	3	True	IndivQLearningSlugsConsistentOrder/93_9_3_slugs_decentralized	slugs_decentralized	shields/general_shield	False	0.05
IndivQLearningSlugsConsistentOrder/93_9_3	slugs_centralized	shields/general_shield	True	-10		False	GridWorld	ISR	FullObsDiscrete	Individual_Q	1.0	0.05	2500000	3	True	IndivQLearningSlugsConsistentOrder/93_9_3_none	none			0.05
IndivQLearningSlugsConsistentOrder/94_9_4	slugs_centralized	shields/general_shield	True	-10		False	GridWorld	ISR	FullObsDiscrete	Individual_Q	1.0	0.05	2500000	4	True	IndivQLearningSlugsConsistentOrder/94_9_4_slugs_centralized	slugs_centralized	shields/general_shield		0.05
IndivQLearningSlugsConsistentOrder/94_9_4	slugs_centralized	shields/general_shield	True	-10		False	GridWorld	ISR	FullObsDiscrete	Individual_Q	1.0	0.05	2500000	4	True	IndivQLearningSlugsConsistentOrder/94_9_4_slugs_decentralized	slugs_decentralized	shields/general_shield	False	0.05
IndivQLearningSlugsConsistentOrder/94_9_4	slugs_centralized	shields/general_shield	True	-10		False	GridWorld	ISR	FullObsDiscrete	Individual_Q	1.0	0.05	2500000	4	True	IndivQLearningSlugsConsistentOrder/94_9_4_none	none			0.05
IndivQLearningSlugsConsistentOrder/95_9_5	slugs_centralized	shields/general_shield	True	-10		False	GridWorld	ISR	FullObsDiscrete	Individual_Q	1.0	0.05	2500000	5	True	IndivQLearningSlugsConsistentOrder/95_9_5_slugs_centralized	slugs_centralized	shields/general_shield		0.05
IndivQLearningSlugsConsistentOrder/95_9_5	slugs_centralized	shields/general_shield	True	-10		False	GridWorld	ISR	FullObsDiscrete	Individual_Q	1.0	0.05	2500000	5	True	IndivQLearningSlugsConsistentOrder/95_9_5_slugs_decentralized	slugs_decentralized	shields/general_shield	False	0.05
IndivQLearningSlugsConsistentOrder/95_9_5	slugs_centralized	shields/general_shield	True	-10		False	GridWorld	ISR	FullObsDiscrete	Individual_Q	1.0	0.05	2500000	5	True	IndivQLearningSlugsConsistentOrder/95_9_5_none	none			0.05
IndivQLearningSlugsConsistentOrder/96_9_6	slugs_centralized	shields/general_shield	True	-10		False	GridWorld	ISR	FullObsDiscrete	Individual_Q	1.0	0.05	2500000	6	True	IndivQLearningSlugsConsistentOrder/96_9_6_slugs_centralized	slugs_centralized	shields/general_shield		0.05
IndivQLearningSlugsConsistentOrder/96_9_6	slugs_centralized	shields/general_shield	True	-10		False	GridWorld	ISR	FullObsDiscrete	Individual_Q	1.0	0.05	2500000	6	True	IndivQLearningSlugsConsistentOrder/96_9_6_slugs_decentralized	slugs_decentralized	shields/general_shield	False	0.05
IndivQLearningSlugsConsistentOrder/96_9_6	slugs_centralized	shields/general_shield	True	-10		False	GridWorld	ISR	FullObsDiscrete	Individual_Q	1.0	0.05	2500000	6	True	IndivQLearningSlugsConsistentOrder/96_9_6_none	none			0.05
IndivQLearningSlugsConsistentOrder/97_9_7	slugs_centralized	shields/general_shield	True	-10		False	GridWorld	ISR	FullObsDiscrete	Individual_Q	1.0	0.05	2500000	7	True	IndivQLearningSlugsConsistentOrder/97_9_7_slugs_centralized	slugs_centralized	shields/general_shield		0.05
IndivQLearningSlugsConsistentOrder/97_9_7	slugs_centralized	shields/general_shield	True	-10		False	GridWorld	ISR	FullObsDiscrete	Individual_Q	1.0	0.05	2500000	7	True	IndivQLearningSlugsConsistentOrder/97_9_7_slugs_decentralized	slugs_decentralized	shields/general_shield	False	0.05
IndivQLearningSlugsConsistentOrder/97_9_7	slugs_centralized	shields/general_shield	True	-10		False	GridWorld	ISR	FullObsDiscrete	Individual_Q	1.0	0.05	2500000	7	True	IndivQLearningSlugsConsistentOrder/97_9_7_none	none			0.05
IndivQLearningSlugsConsistentOrder/98_9_8	slugs_centralized	shields/general_shield	True	-10		False	GridWorld	ISR	FullObsDiscrete	Individual_Q	1.0	0.05	2500000	8	True	IndivQLearningSlugsConsistentOrder/98_9_8_slugs_centralized	slugs_centralized	shields/general_shield		0.05
IndivQLearningSlugsConsistentOrder/98_9_8	slugs_centralized	shields/general_shield	True	-10		False	GridWorld	ISR	FullObsDiscrete	Individual_Q	1.0	0.05	2500000	8	True	IndivQLearningSlugsConsistentOrder/98_9_8_slugs_decentralized	slugs_decentralized	shields/general_shield	False	0.05
IndivQLearningSlugsConsistentOrder/98_9_8	slugs_centralized	shields/general_shield	True	-10		False	GridWorld	ISR	FullObsDiscrete	Individual_Q	1.0	0.05	2500000	8	True	IndivQLearningSlugsConsistentOrder/98_9_8_none	none			0.05
IndivQLearningSlugsConsistentOrder/99_9_9	slugs_centralized	shields/general_shield	True	-10		False	GridWorld	ISR	FullObsDiscrete	Individual_Q	1.0	0.05	2500000	9	True	IndivQLearningSlugsConsistentOrder/99_9_9_slugs_centralized	slugs_centralized	shields/general_shield		0.05
IndivQLearningSlugsConsistentOrder/99_9_9	slugs_centralized	shields/general_shield	True	-10		False	GridWorld	ISR	FullObsDiscrete	Individual_Q	1.0	0.05	2500000	9	True	IndivQLearningSlugsConsistentOrder/99_9_9_slugs_decentralized	slugs_decentralized	shields/general_shield	False	0.05
IndivQLearningSlugsConsistentOrder/99_9_9	slugs_centralized	shields/general_shield	True	-10		False	GridWorld	ISR	FullObsDiscrete	Individual_Q	1.0	0.05	2500000	9	True	IndivQLearningSlugsConsistentOrder/99_9_9_none	none			0.05
IndivQLearningSlugsConsistentOrder/100_10_0	slugs_decentralized	shields/general_shield	True	-10	False	False	GridWorld	ISR	FullObsDiscrete	Individual_Q	1.0	0.05	2500000	0	True	IndivQLearningSlugsConsistentOrder/100_10_0_slugs_centralized	slugs_centralized	shields/general_shield		0.05
IndivQLearningSlugsConsistentOrder/100_10_0	slugs_decentralized	shields/general_shield	True	-10	False	False	GridWorld	ISR	FullObsDiscrete	Individual_Q	1.0	0.05	2500000	0	True	IndivQLearningSlugsConsistentOrder/100_10_0_slugs_decentralized	slugs_decentralized	shields/general_shield	False	0.05
IndivQLearningSlugsConsistentOrder/100_10_0	slugs_decentralized	shields/general_shield	True	-10	False	False	GridWorld	ISR	FullObsDiscrete	Individual_Q	1.0	0.05	2500000	0	True	IndivQLearningSlugsConsistentOrder/100_10_0_none	none			0.05
IndivQLearningSlugsConsistentOrder/101_10_1	slugs_decentralized	shields/general_shield	True	-10	False	False	GridWorld	ISR	FullObsDiscrete	Individual_Q	1.0	0.05	2500000	1	True	IndivQLearningSlugsConsistentOrder/101_10_1_slugs_centralized	slugs_centralized	shields/general_shield		0.05
IndivQLearningSlugsConsistentOrder/101_10_1	slugs_decentralized	shields/general_shield	True	-10	False	False	GridWorld	ISR	FullObsDiscrete	Individual_Q	1.0	0.05	2500000	1	True	IndivQLearningSlugsConsistentOrder/101_10_1_slugs_decentralized	slugs_decentralized	shields/general_shield	False	0.05
IndivQLearningSlugsConsistentOrder/101_10_1	slugs_decentralized	shields/general_shield	True	-10	False	False	GridWorld	ISR	FullObsDiscrete	Individual_Q	1.0	0.05	2500000	1	True	IndivQLearningSlugsConsistentOrder/101_10_1_none	none			0.05
IndivQLearningSlugsConsistentOrder/102_10_2	slugs_decentralized	shields/general_shield	True	-10	False	False	GridWorld	ISR	FullObsDiscrete	Individual_Q	1.0	0.05	2500000	2	True	IndivQLearningSlugsConsistentOrder/102_10_2_slugs_centralized	slugs_centralized	shields/general_shield		0.05
IndivQLearningSlugsConsistentOrder/102_10_2	slugs_decentralized	shields/general_shield	True	-10	False	False	GridWorld	ISR	FullObsDiscrete	Individual_Q	1.0	0.05	2500000	2	True	IndivQLearningSlugsConsistentOrder/102_10_2_slugs_decentralized	slugs_decentralized	shields/general_shield	False	0.05
IndivQLearningSlugsConsistentOrder/102_10_2	slugs_decentralized	shields/general_shield	True	-10	False	False	GridWorld	ISR	FullObsDiscrete	Individual_Q	1.0	0.05	2500000	2	True	IndivQLearningSlugsConsistentOrder/102_10_2_none	none			0.05
IndivQLearningSlugsConsistentOrder/103_10_3	slugs_decentralized	shields/general_shield	True	-10	False	False	GridWorld	ISR	FullObsDiscrete	Individual_Q	1.0	0.05	2500000	3	True	IndivQLearningSlugsConsistentOrder/103_10_3_slugs_centralized	slugs_centralized	shields/general_shield		0.05
IndivQLearningSlugsConsistentOrder/103_10_3	slugs_decentralized	shields/general_shield	True	-10	False	False	GridWorld	ISR	FullObsDiscrete	Individual_Q	1.0	0.05	2500000	3	True	IndivQLearningSlugsConsistentOrder/103_10_3_slugs_decentralized	slugs_decentralized	shields/general_shield	False	0.05
IndivQLearningSlugsConsistentOrder/103_10_3	slugs_decentralized	shields/general_shield	True	-10	False	False	GridWorld	ISR	FullObsDiscrete	Individual_Q	1.0	0.05	2500000	3	True	IndivQLearningSlugsConsistentOrder/103_10_3_none	none			0.05
IndivQLearningSlugsConsistentOrder/104_10_4	slugs_decentralized	shields/general_shield	True	-10	False	False	GridWorld	ISR	FullObsDiscrete	Individual_Q	1.0	0.05	2500000	4	True	IndivQLearningSlugsConsistentOrder/104_10_4_slugs_centralized	slugs_centralized	shields/general_shield		0.05
IndivQLearningSlugsConsistentOrder/104_10_4	slugs_decentralized	shields/general_shield	True	-10	False	False	GridWorld	ISR	FullObsDiscrete	Individual_Q	1.0	0.05	2500000	4	True	IndivQLearningSlugsConsistentOrder/104_10_4_slugs_decentralized	slugs_decentralized	shields/general_shield	False	0.05
IndivQLearningSlugsConsistentOrder/104_10_4	slugs_decentralized	shields/general_shield	True	-10	False	False	GridWorld	ISR	FullObsDiscrete	Individual_Q	1.0	0.05	2500000	4	True	IndivQLearningSlugsConsistentOrder/104_10_4_none	none			0.05
IndivQLearningSlugsConsistentOrder/105_10_5	slugs_decentralized	shields/general_shield	True	-10	False	False	GridWorld	ISR	FullObsDiscrete	Individual_Q	1.0	0.05	2500000	5	True	IndivQLearningSlugsConsistentOrder/105_10_5_slugs_centralized	slugs_centralized	shields/general_shield		0.05
IndivQLearningSlugsConsistentOrder/105_10_5	slugs_decentralized	shields/general_shield	True	-10	False	False	GridWorld	ISR	FullObsDiscrete	Individual_Q	1.0	0.05	2500000	5	True	IndivQLearningSlugsConsistentOrder/105_10_5_slugs_decentralized	slugs_decentralized	shields/general_shield	False	0.05
IndivQLearningSlugsConsistentOrder/105_10_5	slugs_decentralized	shields/general_shield	True	-10	False	False	GridWorld	ISR	FullObsDiscrete	Individual_Q	1.0	0.05	2500000	5	True	IndivQLearningSlugsConsistentOrder/105_10_5_none	none			0.05
IndivQLearningSlugsConsistentOrder/106_10_6	slugs_decentralized	shields/general_shield	True	-10	False	False	GridWorld	ISR	FullObsDiscrete	Individual_Q	1.0	0.05	2500000	6	True	IndivQLearningSlugsConsistentOrder/106_10_6_slugs_centralized	slugs_centralized	shields/general_shield		0.05
IndivQLearningSlugsConsistentOrder/106_10_6	slugs_decentralized	shields/general_shield	True	-10	False	False	GridWorld	ISR	FullObsDiscrete	Individual_Q	1.0	0.05	2500000	6	True	IndivQLearningSlugsConsistentOrder/106_10_6_slugs_decentralized	slugs_decentralized	shields/general_shield	False	0.05
IndivQLearningSlugsConsistentOrder/106_10_6	slugs_decentralized	shields/general_shield	True	-10	False	False	GridWorld	ISR	FullObsDiscrete	Individual_Q	1.0	0.05	2500000	6	True	IndivQLearningSlugsConsistentOrder/106_10_6_none	none			0.05
IndivQLearningSlugsConsistentOrder/107_10_7	slugs_decentralized	shields/general_shield	True	-10	False	False	GridWorld	ISR	FullObsDiscrete	Individual_Q	1.0	0.05	2500000	7	True	IndivQLearningSlugsConsistentOrder/107_10_7_slugs_centralized	slugs_centralized	shields/general_shield		0.05
IndivQLearningSlugsConsistentOrder/107_10_7	slugs_decentralized	shields/general_shield	True	-10	False	False	GridWorld	ISR	FullObsDiscrete	Individual_Q	1.0	0.05	2500000	7	True	IndivQLearningSlugsConsistentOrder/107_10_7_slugs_decentralized	slugs_decentralized	shields/general_shield	False	0.05
IndivQLearningSlugsConsistentOrder/107_10_7	slugs_decentralized	shields/general_shield	True	-10	False	False	GridWorld	ISR	FullObsDiscrete	Individual_Q	1.0	0.05	2500000	7	True	IndivQLearningSlugsConsistentOrder/107_10_7_none	none			0.05
IndivQLearningSlugsConsistentOrder/108_10_8	slugs_decentralized	shields/general_shield	True	-10	False	False	GridWorld	ISR	FullObsDiscrete	Individual_Q	1.0	0.05	2500000	8	True	IndivQLearningSlugsConsistentOrder/108_10_8_slugs_centralized	slugs_centralized	shields/general_shield		0.05
IndivQLearningSlugsConsistentOrder/108_10_8	slugs_decentralized	shields/general_shield	True	-10	False	False	GridWorld	ISR	FullObsDiscrete	Individual_Q	1.0	0.05	2500000	8	True	IndivQLearningSlugsConsistentOrder/108_10_8_slugs_decentralized	slugs_decentralized	shields/general_shield	False	0.05
IndivQLearningSlugsConsistentOrder/108_10_8	slugs_decentralized	shields/general_shield	True	-10	False	False	GridWorld	ISR	FullObsDiscrete	Individual_Q	1.0	0.05	2500000	8	True	IndivQLearningSlugsConsistentOrder/108_10_8_none	none			0.05
IndivQLearningSlugsConsistentOrder/109_10_9	slugs_decentralized	shields/general_shield	True	-10	False	False	GridWorld	ISR	FullObsDiscrete	Individual_Q	1.0	0.05	2500000	9	True	IndivQLearningSlugsConsistentOrder/109_10_9_slugs_centralized	slugs_centralized	shields/general_shield		0.05
IndivQLearningSlugsConsistentOrder/109_10_9	slugs_decentralized	shields/general_shield	True	-10	False	False	GridWorld	ISR	FullObsDiscrete	Individual_Q	1.0	0.05	2500000	9	True	IndivQLearningSlugsConsistentOrder/109_10_9_slugs_decentralized	slugs_decentralized	shields/general_shield	False	0.05
IndivQLearningSlugsConsistentOrder/109_10_9	slugs_decentralized	shields/general_shield	True	-10	False	False	GridWorld	ISR	FullObsDiscrete	Individual_Q	1.0	0.05	2500000	9	True	IndivQLearningSlugsConsistentOrder/109_10_9_none	none			0.05
IndivQLearningSlugsConsistentOrder/110_11_0	none		True	-10		False	GridWorld	ISR	FullObsDiscrete	Individual_Q	1.0	0.05	2500000	0	True	IndivQLearningSlugsConsistentOrder/110_11_0_slugs_centralized	slugs_centralized	shields/general_shield		0.05
IndivQLearningSlugsConsistentOrder/110_11_0	none		True	-10		False	GridWorld	ISR	FullObsDiscrete	Individual_Q	1.0	0.05	2500000	0	True	IndivQLearningSlugsConsistentOrder/110_11_0_slugs_decentralized	slugs_decentralized	shields/general_shield	False	0.05
IndivQLearningSlugsConsistentOrder/110_11_0	none		True	-10		False	GridWorld	ISR	FullObsDiscrete	Individual_Q	1.0	0.05	2500000	0	True	IndivQLearningSlugsConsistentOrder/110_11_0_none	none			0.05
IndivQLearningSlugsConsistentOrder/111_11_1	none		True	-10		False	GridWorld	ISR	FullObsDiscrete	Individual_Q	1.0	0.05	2500000	1	True	IndivQLearningSlugsConsistentOrder/111_11_1_slugs_centralized	slugs_centralized	shields/general_shield		0.05
IndivQLearningSlugsConsistentOrder/111_11_1	none		True	-10		False	GridWorld	ISR	FullObsDiscrete	Individual_Q	1.0	0.05	2500000	1	True	IndivQLearningSlugsConsistentOrder/111_11_1_slugs_decentralized	slugs_decentralized	shields/general_shield	False	0.05
IndivQLearningSlugsConsistentOrder/111_11_1	none		True	-10		False	GridWorld	ISR	FullObsDiscrete	Individual_Q	1.0	0.05	2500000	1	True	IndivQLearningSlugsConsistentOrder/111_11_1_none	none			0.05
IndivQLearningSlugsConsistentOrder/112_11_2	none		True	-10		False	GridWorld	ISR	FullObsDiscrete	Individual_Q	1.0	0.05	2500000	2	True	IndivQLearningSlugsConsistentOrder/112_11_2_slugs_centralized	slugs_centralized	shields/general_shield		0.05
IndivQLearningSlugsConsistentOrder/112_11_2	none		True	-10		False	GridWorld	ISR	FullObsDiscrete	Individual_Q	1.0	0.05	2500000	2	True	IndivQLearningSlugsConsistentOrder/112_11_2_slugs_decentralized	slugs_decentralized	shields/general_shield	False	0.05
IndivQLearningSlugsConsistentOrder/112_11_2	none		True	-10		False	GridWorld	ISR	FullObsDiscrete	Individual_Q	1.0	0.05	2500000	2	True	IndivQLearningSlugsConsistentOrder/112_11_2_none	none			0.05
IndivQLearningSlugsConsistentOrder/113_11_3	none		True	-10		False	GridWorld	ISR	FullObsDiscrete	Individual_Q	1.0	0.05	2500000	3	True	IndivQLearningSlugsConsistentOrder/113_11_3_slugs_centralized	slugs_centralized	shields/general_shield		0.05
IndivQLearningSlugsConsistentOrder/113_11_3	none		True	-10		False	GridWorld	ISR	FullObsDiscrete	Individual_Q	1.0	0.05	2500000	3	True	IndivQLearningSlugsConsistentOrder/113_11_3_slugs_decentralized	slugs_decentralized	shields/general_shield	False	0.05
IndivQLearningSlugsConsistentOrder/113_11_3	none		True	-10		False	GridWorld	ISR	FullObsDiscrete	Individual_Q	1.0	0.05	2500000	3	True	IndivQLearningSlugsConsistentOrder/113_11_3_none	none			0.05
IndivQLearningSlugsConsistentOrder/114_11_4	none		True	-10		False	GridWorld	ISR	FullObsDiscrete	Individual_Q	1.0	0.05	2500000	4	True	IndivQLearningSlugsConsistentOrder/114_11_4_slugs_centralized	slugs_centralized	shields/general_shield		0.05
IndivQLearningSlugsConsistentOrder/114_11_4	none		True	-10		False	GridWorld	ISR	FullObsDiscrete	Individual_Q	1.0	0.05	2500000	4	True	IndivQLearningSlugsConsistentOrder/114_11_4_slugs_decentralized	slugs_decentralized	shields/general_shield	False	0.05
IndivQLearningSlugsConsistentOrder/114_11_4	none		True	-10		False	GridWorld	ISR	FullObsDiscrete	Individual_Q	1.0	0.05	2500000	4	True	IndivQLearningSlugsConsistentOrder/114_11_4_none	none			0.05
IndivQLearningSlugsConsistentOrder/115_11_5	none		True	-10		False	GridWorld	ISR	FullObsDiscrete	Individual_Q	1.0	0.05	2500000	5	True	IndivQLearningSlugsConsistentOrder/115_11_5_slugs_centralized	slugs_centralized	shields/general_shield		0.05
IndivQLearningSlugsConsistentOrder/115_11_5	none		True	-10		False	GridWorld	ISR	FullObsDiscrete	Individual_Q	1.0	0.05	2500000	5	True	IndivQLearningSlugsConsistentOrder/115_11_5_slugs_decentralized	slugs_decentralized	shields/general_shield	False	0.05
IndivQLearningSlugsConsistentOrder/115_11_5	none		True	-10		False	GridWorld	ISR	FullObsDiscrete	Individual_Q	1.0	0.05	2500000	5	True	IndivQLearningSlugsConsistentOrder/115_11_5_none	none			0.05
IndivQLearningSlugsConsistentOrder/116_11_6	none		True	-10		False	GridWorld	ISR	FullObsDiscrete	Individual_Q	1.0	0.05	2500000	6	True	IndivQLearningSlugsConsistentOrder/116_11_6_slugs_centralized	slugs_centralized	shields/general_shield		0.05
IndivQLearningSlugsConsistentOrder/116_11_6	none		True	-10		False	GridWorld	ISR	FullObsDiscrete	Individual_Q	1.0	0.05	2500000	6	True	IndivQLearningSlugsConsistentOrder/116_11_6_slugs_decentralized	slugs_decentralized	shields/general_shield	False	0.05
IndivQLearningSlugsConsistentOrder/116_11_6	none		True	-10		False	GridWorld	ISR	FullObsDiscrete	Individual_Q	1.0	0.05	2500000	6	True	IndivQLearningSlugsConsistentOrder/116_11_6_none	none			0.05
IndivQLearningSlugsConsistentOrder/117_11_7	none		True	-10		False	GridWorld	ISR	FullObsDiscrete	Individual_Q	1.0	0.05	2500000	7	True	IndivQLearningSlugsConsistentOrder/117_11_7_slugs_centralized	slugs_centralized	shields/general_shield		0.05
IndivQLearningSlugsConsistentOrder/117_11_7	none		True	-10		False	GridWorld	ISR	FullObsDiscrete	Individual_Q	1.0	0.05	2500000	7	True	IndivQLearningSlugsConsistentOrder/117_11_7_slugs_decentralized	slugs_decentralized	shields/general_shield	False	0.05
IndivQLearningSlugsConsistentOrder/117_11_7	none		True	-10		False	GridWorld	ISR	FullObsDiscrete	Individual_Q	1.0	0.05	2500000	7	True	IndivQLearningSlugsConsistentOrder/117_11_7_none	none			0.05
IndivQLearningSlugsConsistentOrder/118_11_8	none		True	-10		False	GridWorld	ISR	FullObsDiscrete	Individual_Q	1.0	0.05	2500000	8	True	IndivQLearningSlugsConsistentOrder/118_11_8_slugs_centralized	slugs_centralized	shields/general_shield		0.05
IndivQLearningSlugsConsistentOrder/118_11_8	none		True	-10		False	GridWorld	ISR	FullObsDiscrete	Individual_Q	1.0	0.05	2500000	8	True	IndivQLearningSlugsConsistentOrder/118_11_8_slugs_decentralized	slugs_decentralized	shields/general_shield	False	0.05
IndivQLearningSlugsConsistentOrder/118_11_8	none		True	-10		False	GridWorld	ISR	FullObsDiscrete	Individual_Q	1.0	0.05	2500000	8	True	IndivQLearningSlugsConsistentOrder/118_11_8_none	none			0.05
IndivQLearningSlugsConsistentOrder/119_11_9	none		True	-10		False	GridWorld	ISR	FullObsDiscrete	Individual_Q	1.0	0.05	2500000	9	True	IndivQLearningSlugsConsistentOrder/119_11_9_slugs_centralized	slugs_centralized	shields/general_shield		0.05
IndivQLearningSlugsConsistentOrder/119_11_9	none		True	-10		False	GridWorld	ISR	FullObsDiscrete	Individual_Q	1.0	0.05	2500000	9	True	IndivQLearningSlugsConsistentOrder/119_11_9_slugs_decentralized	slugs_decentralized	shields/general_shield	False	0.05
IndivQLearningSlugsConsistentOrder/119_11_9	none		True	-10		False	GridWorld	ISR	FullObsDiscrete	Individual_Q	1.0	0.05	2500000	9	True	IndivQLearningSlugsConsistentOrder/119_11_9_none	none			0.05
IndivQLearningSlugsConsistentOrder/120_12_0	slugs_centralized	shields/general_shield	True	-10		True	GridWorld	MIT	FullObsDiscrete	Individual_Q	1.0	0.05	2500000	0	True	IndivQLearningSlugsConsistentOrder/120_12_0_slugs_centralized	slugs_centralized	shields/general_shield		0.05
IndivQLearningSlugsConsistentOrder/120_12_0	slugs_centralized	shields/general_shield	True	-10		True	GridWorld	MIT	FullObsDiscrete	Individual_Q	1.0	0.05	2500000	0	True	IndivQLearningSlugsConsistentOrder/120_12_0_slugs_decentralized	slugs_decentralized	shields/general_shield	False	0.05
IndivQLearningSlugsConsistentOrder/120_12_0	slugs_centralized	shields/general_shield	True	-10		True	GridWorld	MIT	FullObsDiscrete	Individual_Q	1.0	0.05	2500000	0	True	IndivQLearningSlugsConsistentOrder/120_12_0_none	none			0.05
IndivQLearningSlugsConsistentOrder/121_12_1	slugs_centralized	shields/general_shield	True	-10		True	GridWorld	MIT	FullObsDiscrete	Individual_Q	1.0	0.05	2500000	1	True	IndivQLearningSlugsConsistentOrder/121_12_1_slugs_centralized	slugs_centralized	shields/general_shield		0.05
IndivQLearningSlugsConsistentOrder/121_12_1	slugs_centralized	shields/general_shield	True	-10		True	GridWorld	MIT	FullObsDiscrete	Individual_Q	1.0	0.05	2500000	1	True	IndivQLearningSlugsConsistentOrder/121_12_1_slugs_decentralized	slugs_decentralized	shields/general_shield	False	0.05
IndivQLearningSlugsConsistentOrder/121_12_1	slugs_centralized	shields/general_shield	True	-10		True	GridWorld	MIT	FullObsDiscrete	Individual_Q	1.0	0.05	2500000	1	True	IndivQLearningSlugsConsistentOrder/121_12_1_none	none			0.05
IndivQLearningSlugsConsistentOrder/122_12_2	slugs_centralized	shields/general_shield	True	-10		True	GridWorld	MIT	FullObsDiscrete	Individual_Q	1.0	0.05	2500000	2	True	IndivQLearningSlugsConsistentOrder/122_12_2_slugs_centralized	slugs_centralized	shields/general_shield		0.05
IndivQLearningSlugsConsistentOrder/122_12_2	slugs_centralized	shields/general_shield	True	-10		True	GridWorld	MIT	FullObsDiscrete	Individual_Q	1.0	0.05	2500000	2	True	IndivQLearningSlugsConsistentOrder/122_12_2_slugs_decentralized	slugs_decentralized	shields/general_shield	False	0.05
IndivQLearningSlugsConsistentOrder/122_12_2	slugs_centralized	shields/general_shield	True	-10		True	GridWorld	MIT	FullObsDiscrete	Individual_Q	1.0	0.05	2500000	2	True	IndivQLearningSlugsConsistentOrder/122_12_2_none	none			0.05
IndivQLearningSlugsConsistentOrder/123_12_3	slugs_centralized	shields/general_shield	True	-10		True	GridWorld	MIT	FullObsDiscrete	Individual_Q	1.0	0.05	2500000	3	True	IndivQLearningSlugsConsistentOrder/123_12_3_slugs_centralized	slugs_centralized	shields/general_shield		0.05
IndivQLearningSlugsConsistentOrder/123_12_3	slugs_centralized	shields/general_shield	True	-10		True	GridWorld	MIT	FullObsDiscrete	Individual_Q	1.0	0.05	2500000	3	True	IndivQLearningSlugsConsistentOrder/123_12_3_slugs_decentralized	slugs_decentralized	shields/general_shield	False	0.05
IndivQLearningSlugsConsistentOrder/123_12_3	slugs_centralized	shields/general_shield	True	-10		True	GridWorld	MIT	FullObsDiscrete	Individual_Q	1.0	0.05	2500000	3	True	IndivQLearningSlugsConsistentOrder/123_12_3_none	none			0.05
IndivQLearningSlugsConsistentOrder/124_12_4	slugs_centralized	shields/general_shield	True	-10		True	GridWorld	MIT	FullObsDiscrete	Individual_Q	1.0	0.05	2500000	4	True	IndivQLearningSlugsConsistentOrder/124_12_4_slugs_centralized	slugs_centralized	shields/general_shield		0.05
IndivQLearningSlugsConsistentOrder/124_12_4	slugs_centralized	shields/general_shield	True	-10		True	GridWorld	MIT	FullObsDiscrete	Individual_Q	1.0	0.05	2500000	4	True	IndivQLearningSlugsConsistentOrder/124_12_4_slugs_decentralized	slugs_decentralized	shields/general_shield	False	0.05
IndivQLearningSlugsConsistentOrder/124_12_4	slugs_centralized	shields/general_shield	True	-10		True	GridWorld	MIT	FullObsDiscrete	Individual_Q	1.0	0.05	2500000	4	True	IndivQLearningSlugsConsistentOrder/124_12_4_none	none			0.05
IndivQLearningSlugsConsistentOrder/125_12_5	slugs_centralized	shields/general_shield	True	-10		True	GridWorld	MIT	FullObsDiscrete	Individual_Q	1.0	0.05	2500000	5	True	IndivQLearningSlugsConsistentOrder/125_12_5_slugs_centralized	slugs_centralized	shields/general_shield		0.05
IndivQLearningSlugsConsistentOrder/125_12_5	slugs_centralized	shields/general_shield	True	-10		True	GridWorld	MIT	FullObsDiscrete	Individual_Q	1.0	0.05	2500000	5	True	IndivQLearningSlugsConsistentOrder/125_12_5_slugs_decentralized	slugs_decentralized	shields/general_shield	False	0.05
IndivQLearningSlugsConsistentOrder/125_12_5	slugs_centralized	shields/general_shield	True	-10		True	GridWorld	MIT	FullObsDiscrete	Individual_Q	1.0	0.05	2500000	5	True	IndivQLearningSlugsConsistentOrder/125_12_5_none	none			0.05
IndivQLearningSlugsConsistentOrder/126_12_6	slugs_centralized	shields/general_shield	True	-10		True	GridWorld	MIT	FullObsDiscrete	Individual_Q	1.0	0.05	2500000	6	True	IndivQLearningSlugsConsistentOrder/126_12_6_slugs_centralized	slugs_centralized	shields/general_shield		0.05
IndivQLearningSlugsConsistentOrder/126_12_6	slugs_centralized	shields/general_shield	True	-10		True	GridWorld	MIT	FullObsDiscrete	Individual_Q	1.0	0.05	2500000	6	True	IndivQLearningSlugsConsistentOrder/126_12_6_slugs_decentralized	slugs_decentralized	shields/general_shield	False	0.05
IndivQLearningSlugsConsistentOrder/126_12_6	slugs_centralized	shields/general_shield	True	-10		True	GridWorld	MIT	FullObsDiscrete	Individual_Q	1.0	0.05	2500000	6	True	IndivQLearningSlugsConsistentOrder/126_12_6_none	none			0.05
IndivQLearningSlugsConsistentOrder/127_12_7	slugs_centralized	shields/general_shield	True	-10		True	GridWorld	MIT	FullObsDiscrete	Individual_Q	1.0	0.05	2500000	7	True	IndivQLearningSlugsConsistentOrder/127_12_7_slugs_centralized	slugs_centralized	shields/general_shield		0.05
IndivQLearningSlugsConsistentOrder/127_12_7	slugs_centralized	shields/general_shield	True	-10		True	GridWorld	MIT	FullObsDiscrete	Individual_Q	1.0	0.05	2500000	7	True	IndivQLearningSlugsConsistentOrder/127_12_7_slugs_decentralized	slugs_decentralized	shields/general_shield	False	0.05
IndivQLearningSlugsConsistentOrder/127_12_7	slugs_centralized	shields/general_shield	True	-10		True	GridWorld	MIT	FullObsDiscrete	Individual_Q	1.0	0.05	2500000	7	True	IndivQLearningSlugsConsistentOrder/127_12_7_none	none			0.05
IndivQLearningSlugsConsistentOrder/128_12_8	slugs_centralized	shields/general_shield	True	-10		True	GridWorld	MIT	FullObsDiscrete	Individual_Q	1.0	0.05	2500000	8	True	IndivQLearningSlugsConsistentOrder/128_12_8_slugs_centralized	slugs_centralized	shields/general_shield		0.05
IndivQLearningSlugsConsistentOrder/128_12_8	slugs_centralized	shields/general_shield	True	-10		True	GridWorld	MIT	FullObsDiscrete	Individual_Q	1.0	0.05	2500000	8	True	IndivQLearningSlugsConsistentOrder/128_12_8_slugs_decentralized	slugs_decentralized	shields/general_shield	False	0.05
IndivQLearningSlugsConsistentOrder/128_12_8	slugs_centralized	shields/general_shield	True	-10		True	GridWorld	MIT	FullObsDiscrete	Individual_Q	1.0	0.05	2500000	8	True	IndivQLearningSlugsConsistentOrder/128_12_8_none	none			0.05
IndivQLearningSlugsConsistentOrder/129_12_9	slugs_centralized	shields/general_shield	True	-10		True	GridWorld	MIT	FullObsDiscrete	Individual_Q	1.0	0.05	2500000	9	True	IndivQLearningSlugsConsistentOrder/129_12_9_slugs_centralized	slugs_centralized	shields/general_shield		0.05
IndivQLearningSlugsConsistentOrder/129_12_9	slugs_centralized	shields/general_shield	True	-10		True	GridWorld	MIT	FullObsDiscrete	Individual_Q	1.0	0.05	2500000	9	True	IndivQLearningSlugsConsistentOrder/129_12_9_slugs_decentralized	slugs_decentralized	shields/general_shield	False	0.05
IndivQLearningSlugsConsistentOrder/129_12_9	slugs_centralized	shields/general_shield	True	-10		True	GridWorld	MIT	FullObsDiscrete	Individual_Q	1.0	0.05	2500000	9	True	IndivQLearningSlugsConsistentOrder/129_12_9_none	none			0.05
IndivQLearningSlugsConsistentOrder/130_13_0	slugs_decentralized	shields/general_shield	True	-10	False	True	GridWorld	MIT	FullObsDiscrete	Individual_Q	1.0	0.05	2500000	0	True	IndivQLearningSlugsConsistentOrder/130_13_0_slugs_centralized	slugs_centralized	shields/general_shield		0.05
IndivQLearningSlugsConsistentOrder/130_13_0	slugs_decentralized	shields/general_shield	True	-10	False	True	GridWorld	MIT	FullObsDiscrete	Individual_Q	1.0	0.05	2500000	0	True	IndivQLearningSlugsConsistentOrder/130_13_0_slugs_decentralized	slugs_decentralized	shields/general_shield	False	0.05
IndivQLearningSlugsConsistentOrder/130_13_0	slugs_decentralized	shields/general_shield	True	-10	False	True	GridWorld	MIT	FullObsDiscrete	Individual_Q	1.0	0.05	2500000	0	True	IndivQLearningSlugsConsistentOrder/130_13_0_none	none			0.05
IndivQLearningSlugsConsistentOrder/131_13_1	slugs_decentralized	shields/general_shield	True	-10	False	True	GridWorld	MIT	FullObsDiscrete	Individual_Q	1.0	0.05	2500000	1	True	IndivQLearningSlugsConsistentOrder/131_13_1_slugs_centralized	slugs_centralized	shields/general_shield		0.05
IndivQLearningSlugsConsistentOrder/131_13_1	slugs_decentralized	shields/general_shield	True	-10	False	True	GridWorld	MIT	FullObsDiscrete	Individual_Q	1.0	0.05	2500000	1	True	IndivQLearningSlugsConsistentOrder/131_13_1_slugs_decentralized	slugs_decentralized	shields/general_shield	False	0.05
IndivQLearningSlugsConsistentOrder/131_13_1	slugs_decentralized	shields/general_shield	True	-10	False	True	GridWorld	MIT	FullObsDiscrete	Individual_Q	1.0	0.05	2500000	1	True	IndivQLearningSlugsConsistentOrder/131_13_1_none	none			0.05
IndivQLearningSlugsConsistentOrder/132_13_2	slugs_decentralized	shields/general_shield	True	-10	False	True	GridWorld	MIT	FullObsDiscrete	Individual_Q	1.0	0.05	2500000	2	True	IndivQLearningSlugsConsistentOrder/132_13_2_slugs_centralized	slugs_centralized	shields/general_shield		0.05
IndivQLearningSlugsConsistentOrder/132_13_2	slugs_decentralized	shields/general_shield	True	-10	False	True	GridWorld	MIT	FullObsDiscrete	Individual_Q	1.0	0.05	2500000	2	True	IndivQLearningSlugsConsistentOrder/132_13_2_slugs_decentralized	slugs_decentralized	shields/general_shield	False	0.05
IndivQLearningSlugsConsistentOrder/132_13_2	slugs_decentralized	shields/general_shield	True	-10	False	True	GridWorld	MIT	FullObsDiscrete	Individual_Q	1.0	0.05	2500000	2	True	IndivQLearningSlugsConsistentOrder/132_13_2_none	none			0.05
IndivQLearningSlugsConsistentOrder/133_13_3	slugs_decentralized	shields/general_shield	True	-10	False	True	GridWorld	MIT	FullObsDiscrete	Individual_Q	1.0	0.05	2500000	3	True	IndivQLearningSlugsConsistentOrder/133_13_3_slugs_centralized	slugs_centralized	shields/general_shield		0.05
IndivQLearningSlugsConsistentOrder/133_13_3	slugs_decentralized	shields/general_shield	True	-10	False	True	GridWorld	MIT	FullObsDiscrete	Individual_Q	1.0	0.05	2500000	3	True	IndivQLearningSlugsConsistentOrder/133_13_3_slugs_decentralized	slugs_decentralized	shields/general_shield	False	0.05
IndivQLearningSlugsConsistentOrder/133_13_3	slugs_decentralized	shields/general_shield	True	-10	False	True	GridWorld	MIT	FullObsDiscrete	Individual_Q	1.0	0.05	2500000	3	True	IndivQLearningSlugsConsistentOrder/133_13_3_none	none			0.05
IndivQLearningSlugsConsistentOrder/134_13_4	slugs_decentralized	shields/general_shield	True	-10	False	True	GridWorld	MIT	FullObsDiscrete	Individual_Q	1.0	0.05	2500000	4	True	IndivQLearningSlugsConsistentOrder/134_13_4_slugs_centralized	slugs_centralized	shields/general_shield		0.05
IndivQLearningSlugsConsistentOrder/134_13_4	slugs_decentralized	shields/general_shield	True	-10	False	True	GridWorld	MIT	FullObsDiscrete	Individual_Q	1.0	0.05	2500000	4	True	IndivQLearningSlugsConsistentOrder/134_13_4_slugs_decentralized	slugs_decentralized	shields/general_shield	False	0.05
IndivQLearningSlugsConsistentOrder/134_13_4	slugs_decentralized	shields/general_shield	True	-10	False	True	GridWorld	MIT	FullObsDiscrete	Individual_Q	1.0	0.05	2500000	4	True	IndivQLearningSlugsConsistentOrder/134_13_4_none	none			0.05
IndivQLearningSlugsConsistentOrder/135_13_5	slugs_decentralized	shields/general_shield	True	-10	False	True	GridWorld	MIT	FullObsDiscrete	Individual_Q	1.0	0.05	2500000	5	True	IndivQLearningSlugsConsistentOrder/135_13_5_slugs_centralized	slugs_centralized	shields/general_shield		0.05
IndivQLearningSlugsConsistentOrder/135_13_5	slugs_decentralized	shields/general_shield	True	-10	False	True	GridWorld	MIT	FullObsDiscrete	Individual_Q	1.0	0.05	2500000	5	True	IndivQLearningSlugsConsistentOrder/135_13_5_slugs_decentralized	slugs_decentralized	shields/general_shield	False	0.05
IndivQLearningSlugsConsistentOrder/135_13_5	slugs_decentralized	shields/general_shield	True	-10	False	True	GridWorld	MIT	FullObsDiscrete	Individual_Q	1.0	0.05	2500000	5	True	IndivQLearningSlugsConsistentOrder/135_13_5_none	none			0.05
IndivQLearningSlugsConsistentOrder/136_13_6	slugs_decentralized	shields/general_shield	True	-10	False	True	GridWorld	MIT	FullObsDiscrete	Individual_Q	1.0	0.05	2500000	6	True	IndivQLearningSlugsConsistentOrder/136_13_6_slugs_centralized	slugs_centralized	shields/general_shield		0.05
IndivQLearningSlugsConsistentOrder/136_13_6	slugs_decentralized	shields/general_shield	True	-10	False	True	GridWorld	MIT	FullObsDiscrete	Individual_Q	1.0	0.05	2500000	6	True	IndivQLearningSlugsConsistentOrder/136_13_6_slugs_decentralized	slugs_decentralized	shields/general_shield	False	0.05
IndivQLearningSlugsConsistentOrder/136_13_6	slugs_decentralized	shields/general_shield	True	-10	False	True	GridWorld	MIT	FullObsDiscrete	Individual_Q	1.0	0.05	2500000	6	True	IndivQLearningSlugsConsistentOrder/136_13_6_none	none			0.05
IndivQLearningSlugsConsistentOrder/137_13_7	slugs_decentralized	shields/general_shield	True	-10	False	True	GridWorld	MIT	FullObsDiscrete	Individual_Q	1.0	0.05	2500000	7	True	IndivQLearningSlugsConsistentOrder/137_13_7_slugs_centralized	slugs_centralized	shields/general_shield		0.05
IndivQLearningSlugsConsistentOrder/137_13_7	slugs_decentralized	shields/general_shield	True	-10	False	True	GridWorld	MIT	FullObsDiscrete	Individual_Q	1.0	0.05	2500000	7	True	IndivQLearningSlugsConsistentOrder/137_13_7_slugs_decentralized	slugs_decentralized	shields/general_shield	False	0.05
IndivQLearningSlugsConsistentOrder/137_13_7	slugs_decentralized	shields/general_shield	True	-10	False	True	GridWorld	MIT	FullObsDiscrete	Individual_Q	1.0	0.05	2500000	7	True	IndivQLearningSlugsConsistentOrder/137_13_7_none	none			0.05
IndivQLearningSlugsConsistentOrder/138_13_8	slugs_decentralized	shields/general_shield	True	-10	False	True	GridWorld	MIT	FullObsDiscrete	Individual_Q	1.0	0.05	2500000	8	True	IndivQLearningSlugsConsistentOrder/138_13_8_slugs_centralized	slugs_centralized	shields/general_shield		0.05
IndivQLearningSlugsConsistentOrder/138_13_8	slugs_decentralized	shields/general_shield	True	-10	False	True	GridWorld	MIT	FullObsDiscrete	Individual_Q	1.0	0.05	2500000	8	True	IndivQLearningSlugsConsistentOrder/138_13_8_slugs_decentralized	slugs_decentralized	shields/general_shield	False	0.05
IndivQLearningSlugsConsistentOrder/138_13_8	slugs_decentralized	shields/general_shield	True	-10	False	True	GridWorld	MIT	FullObsDiscrete	Individual_Q	1.0	0.05	2500000	8	True	IndivQLearningSlugsConsistentOrder/138_13_8_none	none			0.05
IndivQLearningSlugsConsistentOrder/139_13_9	slugs_decentralized	shields/general_shield	True	-10	False	True	GridWorld	MIT	FullObsDiscrete	Individual_Q	1.0	0.05	2500000	9	True	IndivQLearningSlugsConsistentOrder/139_13_9_slugs_centralized	slugs_centralized	shields/general_shield		0.05
IndivQLearningSlugsConsistentOrder/139_13_9	slugs_decentralized	shields/general_shield	True	-10	False	True	GridWorld	MIT	FullObsDiscrete	Individual_Q	1.0	0.05	2500000	9	True	IndivQLearningSlugsConsistentOrder/139_13_9_slugs_decentralized	slugs_decentralized	shields/general_shield	False	0.05
IndivQLearningSlugsConsistentOrder/139_13_9	slugs_decentralized	shields/general_shield	True	-10	False	True	GridWorld	MIT	FullObsDiscrete	Individual_Q	1.0	0.05	2500000	9	True	IndivQLearningSlugsConsistentOrder/139_13_9_none	none			0.05
IndivQLearningSlugsConsistentOrder/140_14_0	none		True	-10		True	GridWorld	MIT	FullObsDiscrete	Individual_Q	1.0	0.05	2500000	0	True	IndivQLearningSlugsConsistentOrder/140_14_0_slugs_centralized	slugs_centralized	shields/general_shield		0.05
IndivQLearningSlugsConsistentOrder/140_14_0	none		True	-10		True	GridWorld	MIT	FullObsDiscrete	Individual_Q	1.0	0.05	2500000	0	True	IndivQLearningSlugsConsistentOrder/140_14_0_slugs_decentralized	slugs_decentralized	shields/general_shield	False	0.05
IndivQLearningSlugsConsistentOrder/140_14_0	none		True	-10		True	GridWorld	MIT	FullObsDiscrete	Individual_Q	1.0	0.05	2500000	0	True	IndivQLearningSlugsConsistentOrder/140_14_0_none	none			0.05
IndivQLearningSlugsConsistentOrder/141_14_1	none		True	-10		True	GridWorld	MIT	FullObsDiscrete	Individual_Q	1.0	0.05	2500000	1	True	IndivQLearningSlugsConsistentOrder/141_14_1_slugs_centralized	slugs_centralized	shields/general_shield		0.05
IndivQLearningSlugsConsistentOrder/141_14_1	none		True	-10		True	GridWorld	MIT	FullObsDiscrete	Individual_Q	1.0	0.05	2500000	1	True	IndivQLearningSlugsConsistentOrder/141_14_1_slugs_decentralized	slugs_decentralized	shields/general_shield	False	0.05
IndivQLearningSlugsConsistentOrder/141_14_1	none		True	-10		True	GridWorld	MIT	FullObsDiscrete	Individual_Q	1.0	0.05	2500000	1	True	IndivQLearningSlugsConsistentOrder/141_14_1_none	none			0.05
IndivQLearningSlugsConsistentOrder/142_14_2	none		True	-10		True	GridWorld	MIT	FullObsDiscrete	Individual_Q	1.0	0.05	2500000	2	True	IndivQLearningSlugsConsistentOrder/142_14_2_slugs_centralized	slugs_centralized	shields/general_shield		0.05
IndivQLearningSlugsConsistentOrder/142_14_2	none		True	-10		True	GridWorld	MIT	FullObsDiscrete	Individual_Q	1.0	0.05	2500000	2	True	IndivQLearningSlugsConsistentOrder/142_14_2_slugs_decentralized	slugs_decentralized	shields/general_shield	False	0.05
IndivQLearningSlugsConsistentOrder/142_14_2	none		True	-10		True	GridWorld	MIT	FullObsDiscrete	Individual_Q	1.0	0.05	2500000	2	True	IndivQLearningSlugsConsistentOrder/142_14_2_none	none			0.05
IndivQLearningSlugsConsistentOrder/143_14_3	none		True	-10		True	GridWorld	MIT	FullObsDiscrete	Individual_Q	1.0	0.05	2500000	3	True	IndivQLearningSlugsConsistentOrder/143_14_3_slugs_centralized	slugs_centralized	shields/general_shield		0.05
IndivQLearningSlugsConsistentOrder/143_14_3	none		True	-10		True	GridWorld	MIT	FullObsDiscrete	Individual_Q	1.0	0.05	2500000	3	True	IndivQLearningSlugsConsistentOrder/143_14_3_slugs_decentralized	slugs_decentralized	shields/general_shield	False	0.05
IndivQLearningSlugsConsistentOrder/143_14_3	none		True	-10		True	GridWorld	MIT	FullObsDiscrete	Individual_Q	1.0	0.05	2500000	3	True	IndivQLearningSlugsConsistentOrder/143_14_3_none	none			0.05
IndivQLearningSlugsConsistentOrder/144_14_4	none		True	-10		True	GridWorld	MIT	FullObsDiscrete	Individual_Q	1.0	0.05	2500000	4	True	IndivQLearningSlugsConsistentOrder/144_14_4_slugs_centralized	slugs_centralized	shields/general_shield		0.05
IndivQLearningSlugsConsistentOrder/144_14_4	none		True	-10		True	GridWorld	MIT	FullObsDiscrete	Individual_Q	1.0	0.05	2500000	4	True	IndivQLearningSlugsConsistentOrder/144_14_4_slugs_decentralized	slugs_decentralized	shields/general_shield	False	0.05
IndivQLearningSlugsConsistentOrder/144_14_4	none		True	-10		True	GridWorld	MIT	FullObsDiscrete	Individual_Q	1.0	0.05	2500000	4	True	IndivQLearningSlugsConsistentOrder/144_14_4_none	none			0.05
IndivQLearningSlugsConsistentOrder/145_14_5	none		True	-10		True	GridWorld	MIT	FullObsDiscrete	Individual_Q	1.0	0.05	2500000	5	True	IndivQLearningSlugsConsistentOrder/145_14_5_slugs_centralized	slugs_centralized	shields/general_shield		0.05
IndivQLearningSlugsConsistentOrder/145_14_5	none		True	-10		True	GridWorld	MIT	FullObsDiscrete	Individual_Q	1.0	0.05	2500000	5	True	IndivQLearningSlugsConsistentOrder/145_14_5_slugs_decentralized	slugs_decentralized	shields/general_shield	False	0.05
IndivQLearningSlugsConsistentOrder/145_14_5	none		True	-10		True	GridWorld	MIT	FullObsDiscrete	Individual_Q	1.0	0.05	2500000	5	True	IndivQLearningSlugsConsistentOrder/145_14_5_none	none			0.05
IndivQLearningSlugsConsistentOrder/146_14_6	none		True	-10		True	GridWorld	MIT	FullObsDiscrete	Individual_Q	1.0	0.05	2500000	6	True	IndivQLearningSlugsConsistentOrder/146_14_6_slugs_centralized	slugs_centralized	shields/general_shield		0.05
IndivQLearningSlugsConsistentOrder/146_14_6	none		True	-10		True	GridWorld	MIT	FullObsDiscrete	Individual_Q	1.0	0.05	2500000	6	True	IndivQLearningSlugsConsistentOrder/146_14_6_slugs_decentralized	slugs_decentralized	shields/general_shield	False	0.05
IndivQLearningSlugsConsistentOrder/146_14_6	none		True	-10		True	GridWorld	MIT	FullObsDiscrete	Individual_Q	1.0	0.05	2500000	6	True	IndivQLearningSlugsConsistentOrder/146_14_6_none	none			0.05
IndivQLearningSlugsConsistentOrder/147_14_7	none		True	-10		True	GridWorld	MIT	FullObsDiscrete	Individual_Q	1.0	0.05	2500000	7	True	IndivQLearningSlugsConsistentOrder/147_14_7_slugs_centralized	slugs_centralized	shields/general_shield		0.05
IndivQLearningSlugsConsistentOrder/147_14_7	none		True	-10		True	GridWorld	MIT	FullObsDiscrete	Individual_Q	1.0	0.05	2500000	7	True	IndivQLearningSlugsConsistentOrder/147_14_7_slugs_decentralized	slugs_decentralized	shields/general_shield	False	0.05
IndivQLearningSlugsConsistentOrder/147_14_7	none		True	-10		True	GridWorld	MIT	FullObsDiscrete	Individual_Q	1.0	0.05	2500000	7	True	IndivQLearningSlugsConsistentOrder/147_14_7_none	none			0.05
IndivQLearningSlugsConsistentOrder/148_14_8	none		True	-10		True	GridWorld	MIT	FullObsDiscrete	Individual_Q	1.0	0.05	2500000	8	True	IndivQLearningSlugsConsistentOrder/148_14_8_slugs_centralized	slugs_centralized	shields/general_shield		0.05
IndivQLearningSlugsConsistentOrder/148_14_8	none		True	-10		True	GridWorld	MIT	FullObsDiscrete	Individual_Q	1.0	0.05	2500000	8	True	IndivQLearningSlugsConsistentOrder/148_14_8_slugs_decentralized	slugs_decentralized	shields/general_shield	False	0.05
IndivQLearningSlugsConsistentOrder/148_14_8	none		True	-10		True	GridWorld	MIT	FullObsDiscrete	Individual_Q	1.0	0.05	2500000	8	True	IndivQLearningSlugsConsistentOrder/148_14_8_none	none			0.05
IndivQLearningSlugsConsistentOrder/149_14_9	none		True	-10		True	GridWorld	MIT	FullObsDiscrete	Individual_Q	1.0	0.05	2500000	9	True	IndivQLearningSlugsConsistentOrder/149_14_9_slugs_centralized	slugs_centralized	shields/general_shield		0.05
IndivQLearningSlugsConsistentOrder/149_14_9	none		True	-10		True	GridWorld	MIT	FullObsDiscrete	Individual_Q	1.0	0.05	2500000	9	True	IndivQLearningSlugsConsistentOrder/149_14_9_slugs_decentralized	slugs_decentralized	shields/general_shield	False	0.05
IndivQLearningSlugsConsistentOrder/149_14_9	none		True	-10		True	GridWorld	MIT	FullObsDiscrete	Individual_Q	1.0	0.05	2500000	9	True	IndivQLearningSlugsConsistentOrder/149_14_9_none	none			0.05
IndivQLearningSlugsConsistentOrder/150_15_0	slugs_centralized	shields/general_shield	True	-10		False	GridWorld	MIT	FullObsDiscrete	Individual_Q	1.0	0.05	2500000	0	True	IndivQLearningSlugsConsistentOrder/150_15_0_slugs_centralized	slugs_centralized	shields/general_shield		0.05
IndivQLearningSlugsConsistentOrder/150_15_0	slugs_centralized	shields/general_shield	True	-10		False	GridWorld	MIT	FullObsDiscrete	Individual_Q	1.0	0.05	2500000	0	True	IndivQLearningSlugsConsistentOrder/150_15_0_slugs_decentralized	slugs_decentralized	shields/general_shield	False	0.05
IndivQLearningSlugsConsistentOrder/150_15_0	slugs_centralized	shields/general_shield	True	-10		False	GridWorld	MIT	FullObsDiscrete	Individual_Q	1.0	0.05	2500000	0	True	IndivQLearningSlugsConsistentOrder/150_15_0_none	none			0.05
IndivQLearningSlugsConsistentOrder/151_15_1	slugs_centralized	shields/general_shield	True	-10		False	GridWorld	MIT	FullObsDiscrete	Individual_Q	1.0	0.05	2500000	1	True	IndivQLearningSlugsConsistentOrder/151_15_1_slugs_centralized	slugs_centralized	shields/general_shield		0.05
IndivQLearningSlugsConsistentOrder/151_15_1	slugs_centralized	shields/general_shield	True	-10		False	GridWorld	MIT	FullObsDiscrete	Individual_Q	1.0	0.05	2500000	1	True	IndivQLearningSlugsConsistentOrder/151_15_1_slugs_decentralized	slugs_decentralized	shields/general_shield	False	0.05
IndivQLearningSlugsConsistentOrder/151_15_1	slugs_centralized	shields/general_shield	True	-10		False	GridWorld	MIT	FullObsDiscrete	Individual_Q	1.0	0.05	2500000	1	True	IndivQLearningSlugsConsistentOrder/151_15_1_none	none			0.05
IndivQLearningSlugsConsistentOrder/152_15_2	slugs_centralized	shields/general_shield	True	-10		False	GridWorld	MIT	FullObsDiscrete	Individual_Q	1.0	0.05	2500000	2	True	IndivQLearningSlugsConsistentOrder/152_15_2_slugs_centralized	slugs_centralized	shields/general_shield		0.05
IndivQLearningSlugsConsistentOrder/152_15_2	slugs_centralized	shields/general_shield	True	-10		False	GridWorld	MIT	FullObsDiscrete	Individual_Q	1.0	0.05	2500000	2	True	IndivQLearningSlugsConsistentOrder/152_15_2_slugs_decentralized	slugs_decentralized	shields/general_shield	False	0.05
IndivQLearningSlugsConsistentOrder/152_15_2	slugs_centralized	shields/general_shield	True	-10		False	GridWorld	MIT	FullObsDiscrete	Individual_Q	1.0	0.05	2500000	2	True	IndivQLearningSlugsConsistentOrder/152_15_2_none	none			0.05
IndivQLearningSlugsConsistentOrder/153_15_3	slugs_centralized	shields/general_shield	True	-10		False	GridWorld	MIT	FullObsDiscrete	Individual_Q	1.0	0.05	2500000	3	True	IndivQLearningSlugsConsistentOrder/153_15_3_slugs_centralized	slugs_centralized	shields/general_shield		0.05
IndivQLearningSlugsConsistentOrder/153_15_3	slugs_centralized	shields/general_shield	True	-10		False	GridWorld	MIT	FullObsDiscrete	Individual_Q	1.0	0.05	2500000	3	True	IndivQLearningSlugsConsistentOrder/153_15_3_slugs_decentralized	slugs_decentralized	shields/general_shield	False	0.05
IndivQLearningSlugsConsistentOrder/153_15_3	slugs_centralized	shields/general_shield	True	-10		False	GridWorld	MIT	FullObsDiscrete	Individual_Q	1.0	0.05	2500000	3	True	IndivQLearningSlugsConsistentOrder/153_15_3_none	none			0.05
IndivQLearningSlugsConsistentOrder/154_15_4	slugs_centralized	shields/general_shield	True	-10		False	GridWorld	MIT	FullObsDiscrete	Individual_Q	1.0	0.05	2500000	4	True	IndivQLearningSlugsConsistentOrder/154_15_4_slugs_centralized	slugs_centralized	shields/general_shield		0.05
IndivQLearningSlugsConsistentOrder/154_15_4	slugs_centralized	shields/general_shield	True	-10		False	GridWorld	MIT	FullObsDiscrete	Individual_Q	1.0	0.05	2500000	4	True	IndivQLearningSlugsConsistentOrder/154_15_4_slugs_decentralized	slugs_decentralized	shields/general_shield	False	0.05
IndivQLearningSlugsConsistentOrder/154_15_4	slugs_centralized	shields/general_shield	True	-10		False	GridWorld	MIT	FullObsDiscrete	Individual_Q	1.0	0.05	2500000	4	True	IndivQLearningSlugsConsistentOrder/154_15_4_none	none			0.05
IndivQLearningSlugsConsistentOrder/155_15_5	slugs_centralized	shields/general_shield	True	-10		False	GridWorld	MIT	FullObsDiscrete	Individual_Q	1.0	0.05	2500000	5	True	IndivQLearningSlugsConsistentOrder/155_15_5_slugs_centralized	slugs_centralized	shields/general_shield		0.05
IndivQLearningSlugsConsistentOrder/155_15_5	slugs_centralized	shields/general_shield	True	-10		False	GridWorld	MIT	FullObsDiscrete	Individual_Q	1.0	0.05	2500000	5	True	IndivQLearningSlugsConsistentOrder/155_15_5_slugs_decentralized	slugs_decentralized	shields/general_shield	False	0.05
IndivQLearningSlugsConsistentOrder/155_15_5	slugs_centralized	shields/general_shield	True	-10		False	GridWorld	MIT	FullObsDiscrete	Individual_Q	1.0	0.05	2500000	5	True	IndivQLearningSlugsConsistentOrder/155_15_5_none	none			0.05
IndivQLearningSlugsConsistentOrder/156_15_6	slugs_centralized	shields/general_shield	True	-10		False	GridWorld	MIT	FullObsDiscrete	Individual_Q	1.0	0.05	2500000	6	True	IndivQLearningSlugsConsistentOrder/156_15_6_slugs_centralized	slugs_centralized	shields/general_shield		0.05
IndivQLearningSlugsConsistentOrder/156_15_6	slugs_centralized	shields/general_shield	True	-10		False	GridWorld	MIT	FullObsDiscrete	Individual_Q	1.0	0.05	2500000	6	True	IndivQLearningSlugsConsistentOrder/156_15_6_slugs_decentralized	slugs_decentralized	shields/general_shield	False	0.05
IndivQLearningSlugsConsistentOrder/156_15_6	slugs_centralized	shields/general_shield	True	-10		False	GridWorld	MIT	FullObsDiscrete	Individual_Q	1.0	0.05	2500000	6	True	IndivQLearningSlugsConsistentOrder/156_15_6_none	none			0.05
IndivQLearningSlugsConsistentOrder/157_15_7	slugs_centralized	shields/general_shield	True	-10		False	GridWorld	MIT	FullObsDiscrete	Individual_Q	1.0	0.05	2500000	7	True	IndivQLearningSlugsConsistentOrder/157_15_7_slugs_centralized	slugs_centralized	shields/general_shield		0.05
IndivQLearningSlugsConsistentOrder/157_15_7	slugs_centralized	shields/general_shield	True	-10		False	GridWorld	MIT	FullObsDiscrete	Individual_Q	1.0	0.05	2500000	7	True	IndivQLearningSlugsConsistentOrder/157_15_7_slugs_decentralized	slugs_decentralized	shields/general_shield	False	0.05
IndivQLearningSlugsConsistentOrder/157_15_7	slugs_centralized	shields/general_shield	True	-10		False	GridWorld	MIT	FullObsDiscrete	Individual_Q	1.0	0.05	2500000	7	True	IndivQLearningSlugsConsistentOrder/157_15_7_none	none			0.05
IndivQLearningSlugsConsistentOrder/158_15_8	slugs_centralized	shields/general_shield	True	-10		False	GridWorld	MIT	FullObsDiscrete	Individual_Q	1.0	0.05	2500000	8	True	IndivQLearningSlugsConsistentOrder/158_15_8_slugs_centralized	slugs_centralized	shields/general_shield		0.05
IndivQLearningSlugsConsistentOrder/158_15_8	slugs_centralized	shields/general_shield	True	-10		False	GridWorld	MIT	FullObsDiscrete	Individual_Q	1.0	0.05	2500000	8	True	IndivQLearningSlugsConsistentOrder/158_15_8_slugs_decentralized	slugs_decentralized	shields/general_shield	False	0.05
IndivQLearningSlugsConsistentOrder/158_15_8	slugs_centralized	shields/general_shield	True	-10		False	GridWorld	MIT	FullObsDiscrete	Individual_Q	1.0	0.05	2500000	8	True	IndivQLearningSlugsConsistentOrder/158_15_8_none	none			0.05
IndivQLearningSlugsConsistentOrder/159_15_9	slugs_centralized	shields/general_shield	True	-10		False	GridWorld	MIT	FullObsDiscrete	Individual_Q	1.0	0.05	2500000	9	True	IndivQLearningSlugsConsistentOrder/159_15_9_slugs_centralized	slugs_centralized	shields/general_shield		0.05
IndivQLearningSlugsConsistentOrder/159_15_9	slugs_centralized	shields/general_shield	True	-10		False	GridWorld	MIT	FullObsDiscrete	Individual_Q	1.0	0.05	2500000	9	True	IndivQLearningSlugsConsistentOrder/159_15_9_slugs_decentralized	slugs_decentralized	shields/general_shield	False	0.05
IndivQLearningSlugsConsistentOrder/159_15_9	slugs_centralized	shields/general_shield	True	-10		False	GridWorld	MIT	FullObsDiscrete	Individual_Q	1.0	0.05	2500000	9	True	IndivQLearningSlugsConsistentOrder/159_15_9_none	none			0.05
IndivQLearningSlugsConsistentOrder/160_16_0	slugs_decentralized	shields/general_shield	True	-10	False	False	GridWorld	MIT	FullObsDiscrete	Individual_Q	1.0	0.05	2500000	0	True	IndivQLearningSlugsConsistentOrder/160_16_0_slugs_centralized	slugs_centralized	shields/general_shield		0.05
IndivQLearningSlugsConsistentOrder/160_16_0	slugs_decentralized	shields/general_shield	True	-10	False	False	GridWorld	MIT	FullObsDiscrete	Individual_Q	1.0	0.05	2500000	0	True	IndivQLearningSlugsConsistentOrder/160_16_0_slugs_decentralized	slugs_decentralized	shields/general_shield	False	0.05
IndivQLearningSlugsConsistentOrder/160_16_0	slugs_decentralized	shields/general_shield	True	-10	False	False	GridWorld	MIT	FullObsDiscrete	Individual_Q	1.0	0.05	2500000	0	True	IndivQLearningSlugsConsistentOrder/160_16_0_none	none			0.05
IndivQLearningSlugsConsistentOrder/161_16_1	slugs_decentralized	shields/general_shield	True	-10	False	False	GridWorld	MIT	FullObsDiscrete	Individual_Q	1.0	0.05	2500000	1	True	IndivQLearningSlugsConsistentOrder/161_16_1_slugs_centralized	slugs_centralized	shields/general_shield		0.05
IndivQLearningSlugsConsistentOrder/161_16_1	slugs_decentralized	shields/general_shield	True	-10	False	False	GridWorld	MIT	FullObsDiscrete	Individual_Q	1.0	0.05	2500000	1	True	IndivQLearningSlugsConsistentOrder/161_16_1_slugs_decentralized	slugs_decentralized	shields/general_shield	False	0.05
IndivQLearningSlugsConsistentOrder/161_16_1	slugs_decentralized	shields/general_shield	True	-10	False	False	GridWorld	MIT	FullObsDiscrete	Individual_Q	1.0	0.05	2500000	1	True	IndivQLearningSlugsConsistentOrder/161_16_1_none	none			0.05
IndivQLearningSlugsConsistentOrder/162_16_2	slugs_decentralized	shields/general_shield	True	-10	False	False	GridWorld	MIT	FullObsDiscrete	Individual_Q	1.0	0.05	2500000	2	True	IndivQLearningSlugsConsistentOrder/162_16_2_slugs_centralized	slugs_centralized	shields/general_shield		0.05
IndivQLearningSlugsConsistentOrder/162_16_2	slugs_decentralized	shields/general_shield	True	-10	False	False	GridWorld	MIT	FullObsDiscrete	Individual_Q	1.0	0.05	2500000	2	True	IndivQLearningSlugsConsistentOrder/162_16_2_slugs_decentralized	slugs_decentralized	shields/general_shield	False	0.05
IndivQLearningSlugsConsistentOrder/162_16_2	slugs_decentralized	shields/general_shield	True	-10	False	False	GridWorld	MIT	FullObsDiscrete	Individual_Q	1.0	0.05	2500000	2	True	IndivQLearningSlugsConsistentOrder/162_16_2_none	none			0.05
IndivQLearningSlugsConsistentOrder/163_16_3	slugs_decentralized	shields/general_shield	True	-10	False	False	GridWorld	MIT	FullObsDiscrete	Individual_Q	1.0	0.05	2500000	3	True	IndivQLearningSlugsConsistentOrder/163_16_3_slugs_centralized	slugs_centralized	shields/general_shield		0.05
IndivQLearningSlugsConsistentOrder/163_16_3	slugs_decentralized	shields/general_shield	True	-10	False	False	GridWorld	MIT	FullObsDiscrete	Individual_Q	1.0	0.05	2500000	3	True	IndivQLearningSlugsConsistentOrder/163_16_3_slugs_decentralized	slugs_decentralized	shields/general_shield	False	0.05
IndivQLearningSlugsConsistentOrder/163_16_3	slugs_decentralized	shields/general_shield	True	-10	False	False	GridWorld	MIT	FullObsDiscrete	Individual_Q	1.0	0.05	2500000	3	True	IndivQLearningSlugsConsistentOrder/163_16_3_none	none			0.05
IndivQLearningSlugsConsistentOrder/164_16_4	slugs_decentralized	shields/general_shield	True	-10	False	False	GridWorld	MIT	FullObsDiscrete	Individual_Q	1.0	0.05	2500000	4	True	IndivQLearningSlugsConsistentOrder/164_16_4_slugs_centralized	slugs_centralized	shields/general_shield		0.05
IndivQLearningSlugsConsistentOrder/164_16_4	slugs_decentralized	shields/general_shield	True	-10	False	False	GridWorld	MIT	FullObsDiscrete	Individual_Q	1.0	0.05	2500000	4	True	IndivQLearningSlugsConsistentOrder/164_16_4_slugs_decentralized	slugs_decentralized	shields/general_shield	False	0.05
IndivQLearningSlugsConsistentOrder/164_16_4	slugs_decentralized	shields/general_shield	True	-10	False	False	GridWorld	MIT	FullObsDiscrete	Individual_Q	1.0	0.05	2500000	4	True	IndivQLearningSlugsConsistentOrder/164_16_4_none	none			0.05
IndivQLearningSlugsConsistentOrder/165_16_5	slugs_decentralized	shields/general_shield	True	-10	False	False	GridWorld	MIT	FullObsDiscrete	Individual_Q	1.0	0.05	2500000	5	True	IndivQLearningSlugsConsistentOrder/165_16_5_slugs_centralized	slugs_centralized	shields/general_shield		0.05
IndivQLearningSlugsConsistentOrder/165_16_5	slugs_decentralized	shields/general_shield	True	-10	False	False	GridWorld	MIT	FullObsDiscrete	Individual_Q	1.0	0.05	2500000	5	True	IndivQLearningSlugsConsistentOrder/165_16_5_slugs_decentralized	slugs_decentralized	shields/general_shield	False	0.05
IndivQLearningSlugsConsistentOrder/165_16_5	slugs_decentralized	shields/general_shield	True	-10	False	False	GridWorld	MIT	FullObsDiscrete	Individual_Q	1.0	0.05	2500000	5	True	IndivQLearningSlugsConsistentOrder/165_16_5_none	none			0.05
IndivQLearningSlugsConsistentOrder/166_16_6	slugs_decentralized	shields/general_shield	True	-10	False	False	GridWorld	MIT	FullObsDiscrete	Individual_Q	1.0	0.05	2500000	6	True	IndivQLearningSlugsConsistentOrder/166_16_6_slugs_centralized	slugs_centralized	shields/general_shield		0.05
IndivQLearningSlugsConsistentOrder/166_16_6	slugs_decentralized	shields/general_shield	True	-10	False	False	GridWorld	MIT	FullObsDiscrete	Individual_Q	1.0	0.05	2500000	6	True	IndivQLearningSlugsConsistentOrder/166_16_6_slugs_decentralized	slugs_decentralized	shields/general_shield	False	0.05
IndivQLearningSlugsConsistentOrder/166_16_6	slugs_decentralized	shields/general_shield	True	-10	False	False	GridWorld	MIT	FullObsDiscrete	Individual_Q	1.0	0.05	2500000	6	True	IndivQLearningSlugsConsistentOrder/166_16_6_none	none			0.05
IndivQLearningSlugsConsistentOrder/167_16_7	slugs_decentralized	shields/general_shield	True	-10	False	False	GridWorld	MIT	FullObsDiscrete	Individual_Q	1.0	0.05	2500000	7	True	IndivQLearningSlugsConsistentOrder/167_16_7_slugs_centralized	slugs_centralized	shields/general_shield		0.05
IndivQLearningSlugsConsistentOrder/167_16_7	slugs_decentralized	shields/general_shield	True	-10	False	False	GridWorld	MIT	FullObsDiscrete	Individual_Q	1.0	0.05	2500000	7	True	IndivQLearningSlugsConsistentOrder/167_16_7_slugs_decentralized	slugs_decentralized	shields/general_shield	False	0.05
IndivQLearningSlugsConsistentOrder/167_16_7	slugs_decentralized	shields/general_shield	True	-10	False	False	GridWorld	MIT	FullObsDiscrete	Individual_Q	1.0	0.05	2500000	7	True	IndivQLearningSlugsConsistentOrder/167_16_7_none	none			0.05
IndivQLearningSlugsConsistentOrder/168_16_8	slugs_decentralized	shields/general_shield	True	-10	False	False	GridWorld	MIT	FullObsDiscrete	Individual_Q	1.0	0.05	2500000	8	True	IndivQLearningSlugsConsistentOrder/168_16_8_slugs_centralized	slugs_centralized	shields/general_shield		0.05
IndivQLearningSlugsConsistentOrder/168_16_8	slugs_decentralized	shields/general_shield	True	-10	False	False	GridWorld	MIT	FullObsDiscrete	Individual_Q	1.0	0.05	2500000	8	True	IndivQLearningSlugsConsistentOrder/168_16_8_slugs_decentralized	slugs_decentralized	shields/general_shield	False	0.05
IndivQLearningSlugsConsistentOrder/168_16_8	slugs_decentralized	shields/general_shield	True	-10	False	False	GridWorld	MIT	FullObsDiscrete	Individual_Q	1.0	0.05	2500000	8	True	IndivQLearningSlugsConsistentOrder/168_16_8_none	none			0.05
IndivQLearningSlugsConsistentOrder/169_16_9	slugs_decentralized	shields/general_shield	True	-10	False	False	GridWorld	MIT	FullObsDiscrete	Individual_Q	1.0	0.05	2500000	9	True	IndivQLearningSlugsConsistentOrder/169_16_9_slugs_centralized	slugs_centralized	shields/general_shield		0.05
IndivQLearningSlugsConsistentOrder/169_16_9	slugs_decentralized	shields/general_shield	True	-10	False	False	GridWorld	MIT	FullObsDiscrete	Individual_Q	1.0	0.05	2500000	9	True	IndivQLearningSlugsConsistentOrder/169_16_9_slugs_decentralized	slugs_decentralized	shields/general_shield	False	0.05
IndivQLearningSlugsConsistentOrder/169_16_9	slugs_decentralized	shields/general_shield	True	-10	False	False	GridWorld	MIT	FullObsDiscrete	Individual_Q	1.0	0.05	2500000	9	True	IndivQLearningSlugsConsistentOrder/169_16_9_none	none			0.05
IndivQLearningSlugsConsistentOrder/170_17_0	none		True	-10		False	GridWorld	MIT	FullObsDiscrete	Individual_Q	1.0	0.05	2500000	0	True	IndivQLearningSlugsConsistentOrder/170_17_0_slugs_centralized	slugs_centralized	shields/general_shield		0.05
IndivQLearningSlugsConsistentOrder/170_17_0	none		True	-10		False	GridWorld	MIT	FullObsDiscrete	Individual_Q	1.0	0.05	2500000	0	True	IndivQLearningSlugsConsistentOrder/170_17_0_slugs_decentralized	slugs_decentralized	shields/general_shield	False	0.05
IndivQLearningSlugsConsistentOrder/170_17_0	none		True	-10		False	GridWorld	MIT	FullObsDiscrete	Individual_Q	1.0	0.05	2500000	0	True	IndivQLearningSlugsConsistentOrder/170_17_0_none	none			0.05
IndivQLearningSlugsConsistentOrder/171_17_1	none		True	-10		False	GridWorld	MIT	FullObsDiscrete	Individual_Q	1.0	0.05	2500000	1	True	IndivQLearningSlugsConsistentOrder/171_17_1_slugs_centralized	slugs_centralized	shields/general_shield		0.05
IndivQLearningSlugsConsistentOrder/171_17_1	none		True	-10		False	GridWorld	MIT	FullObsDiscrete	Individual_Q	1.0	0.05	2500000	1	True	IndivQLearningSlugsConsistentOrder/171_17_1_slugs_decentralized	slugs_decentralized	shields/general_shield	False	0.05
IndivQLearningSlugsConsistentOrder/171_17_1	none		True	-10		False	GridWorld	MIT	FullObsDiscrete	Individual_Q	1.0	0.05	2500000	1	True	IndivQLearningSlugsConsistentOrder/171_17_1_none	none			0.05
IndivQLearningSlugsConsistentOrder/172_17_2	none		True	-10		False	GridWorld	MIT	FullObsDiscrete	Individual_Q	1.0	0.05	2500000	2	True	IndivQLearningSlugsConsistentOrder/172_17_2_slugs_centralized	slugs_centralized	shields/general_shield		0.05
IndivQLearningSlugsConsistentOrder/172_17_2	none		True	-10		False	GridWorld	MIT	FullObsDiscrete	Individual_Q	1.0	0.05	2500000	2	True	IndivQLearningSlugsConsistentOrder/172_17_2_slugs_decentralized	slugs_decentralized	shields/general_shield	False	0.05
IndivQLearningSlugsConsistentOrder/172_17_2	none		True	-10		False	GridWorld	MIT	FullObsDiscrete	Individual_Q	1.0	0.05	2500000	2	True	IndivQLearningSlugsConsistentOrder/172_17_2_none	none			0.05
IndivQLearningSlugsConsistentOrder/173_17_3	none		True	-10		False	GridWorld	MIT	FullObsDiscrete	Individual_Q	1.0	0.05	2500000	3	True	IndivQLearningSlugsConsistentOrder/173_17_3_slugs_centralized	slugs_centralized	shields/general_shield		0.05
IndivQLearningSlugsConsistentOrder/173_17_3	none		True	-10		False	GridWorld	MIT	FullObsDiscrete	Individual_Q	1.0	0.05	2500000	3	True	IndivQLearningSlugsConsistentOrder/173_17_3_slugs_decentralized	slugs_decentralized	shields/general_shield	False	0.05
IndivQLearningSlugsConsistentOrder/173_17_3	none		True	-10		False	GridWorld	MIT	FullObsDiscrete	Individual_Q	1.0	0.05	2500000	3	True	IndivQLearningSlugsConsistentOrder/173_17_3_none	none			0.05
IndivQLearningSlugsConsistentOrder/174_17_4	none		True	-10		False	GridWorld	MIT	FullObsDiscrete	Individual_Q	1.0	0.05	2500000	4	True	IndivQLearningSlugsConsistentOrder/174_17_4_slugs_centralized	slugs_centralized	shields/general_shield		0.05
IndivQLearningSlugsConsistentOrder/174_17_4	none		True	-10		False	GridWorld	MIT	FullObsDiscrete	Individual_Q	1.0	0.05	2500000	4	True	IndivQLearningSlugsConsistentOrder/174_17_4_slugs_decentralized	slugs_decentralized	shields/general_shield	False	0.05
IndivQLearningSlugsConsistentOrder/174_17_4	none		True	-10		False	GridWorld	MIT	FullObsDiscrete	Individual_Q	1.0	0.05	2500000	4	True	IndivQLearningSlugsConsistentOrder/174_17_4_none	none			0.05
IndivQLearningSlugsConsistentOrder/175_17_5	none		True	-10		False	GridWorld	MIT	FullObsDiscrete	Individual_Q	1.0	0.05	2500000	5	True	IndivQLearningSlugsConsistentOrder/175_17_5_slugs_centralized	slugs_centralized	shields/general_shield		0.05
IndivQLearningSlugsConsistentOrder/175_17_5	none		True	-10		False	GridWorld	MIT	FullObsDiscrete	Individual_Q	1.0	0.05	2500000	5	True	IndivQLearningSlugsConsistentOrder/175_17_5_slugs_decentralized	slugs_decentralized	shields/general_shield	False	0.05
IndivQLearningSlugsConsistentOrder/175_17_5	none		True	-10		False	GridWorld	MIT	FullObsDiscrete	Individual_Q	1.0	0.05	2500000	5	True	IndivQLearningSlugsConsistentOrder/175_17_5_none	none			0.05
IndivQLearningSlugsConsistentOrder/176_17_6	none		True	-10		False	GridWorld	MIT	FullObsDiscrete	Individual_Q	1.0	0.05	2500000	6	True	IndivQLearningSlugsConsistentOrder/176_17_6_slugs_centralized	slugs_centralized	shields/general_shield		0.05
IndivQLearningSlugsConsistentOrder/176_17_6	none		True	-10		False	GridWorld	MIT	FullObsDiscrete	Individual_Q	1.0	0.05	2500000	6	True	IndivQLearningSlugsConsistentOrder/176_17_6_slugs_decentralized	slugs_decentralized	shields/general_shield	False	0.05
IndivQLearningSlugsConsistentOrder/176_17_6	none		True	-10		False	GridWorld	MIT	FullObsDiscrete	Individual_Q	1.0	0.05	2500000	6	True	IndivQLearningSlugsConsistentOrder/176_17_6_none	none			0.05
IndivQLearningSlugsConsistentOrder/177_17_7	none		True	-10		False	GridWorld	MIT	FullObsDiscrete	Individual_Q	1.0	0.05	2500000	7	True	IndivQLearningSlugsConsistentOrder/177_17_7_slugs_centralized	slugs_centralized	shields/general_shield		0.05
IndivQLearningSlugsConsistentOrder/177_17_7	none		True	-10		False	GridWorld	MIT	FullObsDiscrete	Individual_Q	1.0	0.05	2500000	7	True	IndivQLearningSlugsConsistentOrder/177_17_7_slugs_decentralized	slugs_decentralized	shields/general_shield	False	0.05
IndivQLearningSlugsConsistentOrder/177_17_7	none		True	-10		False	GridWorld	MIT	FullObsDiscrete	Individual_Q	1.0	0.05	2500000	7	True	IndivQLearningSlugsConsistentOrder/177_17_7_none	none			0.05
IndivQLearningSlugsConsistentOrder/178_17_8	none		True	-10		False	GridWorld	MIT	FullObsDiscrete	Individual_Q	1.0	0.05	2500000	8	True	IndivQLearningSlugsConsistentOrder/178_17_8_slugs_centralized	slugs_centralized	shields/general_shield		0.05
IndivQLearningSlugsConsistentOrder/178_17_8	none		True	-10		False	GridWorld	MIT	FullObsDiscrete	Individual_Q	1.0	0.05	2500000	8	True	IndivQLearningSlugsConsistentOrder/178_17_8_slugs_decentralized	slugs_decentralized	shields/general_shield	False	0.05
IndivQLearningSlugsConsistentOrder/178_17_8	none		True	-10		False	GridWorld	MIT	FullObsDiscrete	Individual_Q	1.0	0.05	2500000	8	True	IndivQLearningSlugsConsistentOrder/178_17_8_none	none			0.05
IndivQLearningSlugsConsistentOrder/179_17_9	none		True	-10		False	GridWorld	MIT	FullObsDiscrete	Individual_Q	1.0	0.05	2500000	9	True	IndivQLearningSlugsConsistentOrder/179_17_9_slugs_centralized	slugs_centralized	shields/general_shield		0.05
IndivQLearningSlugsConsistentOrder/179_17_9	none		True	-10		False	GridWorld	MIT	FullObsDiscrete	Individual_Q	1.0	0.05	2500000	9	True	IndivQLearningSlugsConsistentOrder/179_17_9_slugs_decentralized	slugs_decentralized	shields/general_shield	False	0.05
IndivQLearningSlugsConsistentOrder/179_17_9	none		True	-10		False	GridWorld	MIT	FullObsDiscrete	Individual_Q	1.0	0.05	2500000	9	True	IndivQLearningSlugsConsistentOrder/179_17_9_none	none			0.05
IndivQLearningSlugsConsistentOrder/180_18_0	slugs_centralized	shields/general_shield	True	-10		True	GridWorld	SUNY	FullObsDiscrete	Individual_Q	1.0	0.05	2500000	0	True	IndivQLearningSlugsConsistentOrder/180_18_0_slugs_centralized	slugs_centralized	shields/general_shield		0.05
IndivQLearningSlugsConsistentOrder/180_18_0	slugs_centralized	shields/general_shield	True	-10		True	GridWorld	SUNY	FullObsDiscrete	Individual_Q	1.0	0.05	2500000	0	True	IndivQLearningSlugsConsistentOrder/180_18_0_slugs_decentralized	slugs_decentralized	shields/general_shield	False	0.05
IndivQLearningSlugsConsistentOrder/180_18_0	slugs_centralized	shields/general_shield	True	-10		True	GridWorld	SUNY	FullObsDiscrete	Individual_Q	1.0	0.05	2500000	0	True	IndivQLearningSlugsConsistentOrder/180_18_0_none	none			0.05
IndivQLearningSlugsConsistentOrder/181_18_1	slugs_centralized	shields/general_shield	True	-10		True	GridWorld	SUNY	FullObsDiscrete	Individual_Q	1.0	0.05	2500000	1	True	IndivQLearningSlugsConsistentOrder/181_18_1_slugs_centralized	slugs_centralized	shields/general_shield		0.05
IndivQLearningSlugsConsistentOrder/181_18_1	slugs_centralized	shields/general_shield	True	-10		True	GridWorld	SUNY	FullObsDiscrete	Individual_Q	1.0	0.05	2500000	1	True	IndivQLearningSlugsConsistentOrder/181_18_1_slugs_decentralized	slugs_decentralized	shields/general_shield	False	0.05
IndivQLearningSlugsConsistentOrder/181_18_1	slugs_centralized	shields/general_shield	True	-10		True	GridWorld	SUNY	FullObsDiscrete	Individual_Q	1.0	0.05	2500000	1	True	IndivQLearningSlugsConsistentOrder/181_18_1_none	none			0.05
IndivQLearningSlugsConsistentOrder/182_18_2	slugs_centralized	shields/general_shield	True	-10		True	GridWorld	SUNY	FullObsDiscrete	Individual_Q	1.0	0.05	2500000	2	True	IndivQLearningSlugsConsistentOrder/182_18_2_slugs_centralized	slugs_centralized	shields/general_shield		0.05
IndivQLearningSlugsConsistentOrder/182_18_2	slugs_centralized	shields/general_shield	True	-10		True	GridWorld	SUNY	FullObsDiscrete	Individual_Q	1.0	0.05	2500000	2	True	IndivQLearningSlugsConsistentOrder/182_18_2_slugs_decentralized	slugs_decentralized	shields/general_shield	False	0.05
IndivQLearningSlugsConsistentOrder/182_18_2	slugs_centralized	shields/general_shield	True	-10		True	GridWorld	SUNY	FullObsDiscrete	Individual_Q	1.0	0.05	2500000	2	True	IndivQLearningSlugsConsistentOrder/182_18_2_none	none			0.05
IndivQLearningSlugsConsistentOrder/183_18_3	slugs_centralized	shields/general_shield	True	-10		True	GridWorld	SUNY	FullObsDiscrete	Individual_Q	1.0	0.05	2500000	3	True	IndivQLearningSlugsConsistentOrder/183_18_3_slugs_centralized	slugs_centralized	shields/general_shield		0.05
IndivQLearningSlugsConsistentOrder/183_18_3	slugs_centralized	shields/general_shield	True	-10		True	GridWorld	SUNY	FullObsDiscrete	Individual_Q	1.0	0.05	2500000	3	True	IndivQLearningSlugsConsistentOrder/183_18_3_slugs_decentralized	slugs_decentralized	shields/general_shield	False	0.05
IndivQLearningSlugsConsistentOrder/183_18_3	slugs_centralized	shields/general_shield	True	-10		True	GridWorld	SUNY	FullObsDiscrete	Individual_Q	1.0	0.05	2500000	3	True	IndivQLearningSlugsConsistentOrder/183_18_3_none	none			0.05
IndivQLearningSlugsConsistentOrder/184_18_4	slugs_centralized	shields/general_shield	True	-10		True	GridWorld	SUNY	FullObsDiscrete	Individual_Q	1.0	0.05	2500000	4	True	IndivQLearningSlugsConsistentOrder/184_18_4_slugs_centralized	slugs_centralized	shields/general_shield		0.05
IndivQLearningSlugsConsistentOrder/184_18_4	slugs_centralized	shields/general_shield	True	-10		True	GridWorld	SUNY	FullObsDiscrete	Individual_Q	1.0	0.05	2500000	4	True	IndivQLearningSlugsConsistentOrder/184_18_4_slugs_decentralized	slugs_decentralized	shields/general_shield	False	0.05
IndivQLearningSlugsConsistentOrder/184_18_4	slugs_centralized	shields/general_shield	True	-10		True	GridWorld	SUNY	FullObsDiscrete	Individual_Q	1.0	0.05	2500000	4	True	IndivQLearningSlugsConsistentOrder/184_18_4_none	none			0.05
IndivQLearningSlugsConsistentOrder/185_18_5	slugs_centralized	shields/general_shield	True	-10		True	GridWorld	SUNY	FullObsDiscrete	Individual_Q	1.0	0.05	2500000	5	True	IndivQLearningSlugsConsistentOrder/185_18_5_slugs_centralized	slugs_centralized	shields/general_shield		0.05
IndivQLearningSlugsConsistentOrder/185_18_5	slugs_centralized	shields/general_shield	True	-10		True	GridWorld	SUNY	FullObsDiscrete	Individual_Q	1.0	0.05	2500000	5	True	IndivQLearningSlugsConsistentOrder/185_18_5_slugs_decentralized	slugs_decentralized	shields/general_shield	False	0.05
IndivQLearningSlugsConsistentOrder/185_18_5	slugs_centralized	shields/general_shield	True	-10		True	GridWorld	SUNY	FullObsDiscrete	Individual_Q	1.0	0.05	2500000	5	True	IndivQLearningSlugsConsistentOrder/185_18_5_none	none			0.05
IndivQLearningSlugsConsistentOrder/186_18_6	slugs_centralized	shields/general_shield	True	-10		True	GridWorld	SUNY	FullObsDiscrete	Individual_Q	1.0	0.05	2500000	6	True	IndivQLearningSlugsConsistentOrder/186_18_6_slugs_centralized	slugs_centralized	shields/general_shield		0.05
IndivQLearningSlugsConsistentOrder/186_18_6	slugs_centralized	shields/general_shield	True	-10		True	GridWorld	SUNY	FullObsDiscrete	Individual_Q	1.0	0.05	2500000	6	True	IndivQLearningSlugsConsistentOrder/186_18_6_slugs_decentralized	slugs_decentralized	shields/general_shield	False	0.05
IndivQLearningSlugsConsistentOrder/186_18_6	slugs_centralized	shields/general_shield	True	-10		True	GridWorld	SUNY	FullObsDiscrete	Individual_Q	1.0	0.05	2500000	6	True	IndivQLearningSlugsConsistentOrder/186_18_6_none	none			0.05
IndivQLearningSlugsConsistentOrder/187_18_7	slugs_centralized	shields/general_shield	True	-10		True	GridWorld	SUNY	FullObsDiscrete	Individual_Q	1.0	0.05	2500000	7	True	IndivQLearningSlugsConsistentOrder/187_18_7_slugs_centralized	slugs_centralized	shields/general_shield		0.05
IndivQLearningSlugsConsistentOrder/187_18_7	slugs_centralized	shields/general_shield	True	-10		True	GridWorld	SUNY	FullObsDiscrete	Individual_Q	1.0	0.05	2500000	7	True	IndivQLearningSlugsConsistentOrder/187_18_7_slugs_decentralized	slugs_decentralized	shields/general_shield	False	0.05
IndivQLearningSlugsConsistentOrder/187_18_7	slugs_centralized	shields/general_shield	True	-10		True	GridWorld	SUNY	FullObsDiscrete	Individual_Q	1.0	0.05	2500000	7	True	IndivQLearningSlugsConsistentOrder/187_18_7_none	none			0.05
IndivQLearningSlugsConsistentOrder/188_18_8	slugs_centralized	shields/general_shield	True	-10		True	GridWorld	SUNY	FullObsDiscrete	Individual_Q	1.0	0.05	2500000	8	True	IndivQLearningSlugsConsistentOrder/188_18_8_slugs_centralized	slugs_centralized	shields/general_shield		0.05
IndivQLearningSlugsConsistentOrder/188_18_8	slugs_centralized	shields/general_shield	True	-10		True	GridWorld	SUNY	FullObsDiscrete	Individual_Q	1.0	0.05	2500000	8	True	IndivQLearningSlugsConsistentOrder/188_18_8_slugs_decentralized	slugs_decentralized	shields/general_shield	False	0.05
IndivQLearningSlugsConsistentOrder/188_18_8	slugs_centralized	shields/general_shield	True	-10		True	GridWorld	SUNY	FullObsDiscrete	Individual_Q	1.0	0.05	2500000	8	True	IndivQLearningSlugsConsistentOrder/188_18_8_none	none			0.05
IndivQLearningSlugsConsistentOrder/189_18_9	slugs_centralized	shields/general_shield	True	-10		True	GridWorld	SUNY	FullObsDiscrete	Individual_Q	1.0	0.05	2500000	9	True	IndivQLearningSlugsConsistentOrder/189_18_9_slugs_centralized	slugs_centralized	shields/general_shield		0.05
IndivQLearningSlugsConsistentOrder/189_18_9	slugs_centralized	shields/general_shield	True	-10		True	GridWorld	SUNY	FullObsDiscrete	Individual_Q	1.0	0.05	2500000	9	True	IndivQLearningSlugsConsistentOrder/189_18_9_slugs_decentralized	slugs_decentralized	shields/general_shield	False	0.05
IndivQLearningSlugsConsistentOrder/189_18_9	slugs_centralized	shields/general_shield	True	-10		True	GridWorld	SUNY	FullObsDiscrete	Individual_Q	1.0	0.05	2500000	9	True	IndivQLearningSlugsConsistentOrder/189_18_9_none	none			0.05
IndivQLearningSlugsConsistentOrder/190_19_0	slugs_decentralized	shields/general_shield	True	-10	False	True	GridWorld	SUNY	FullObsDiscrete	Individual_Q	1.0	0.05	2500000	0	True	IndivQLearningSlugsConsistentOrder/190_19_0_slugs_centralized	slugs_centralized	shields/general_shield		0.05
IndivQLearningSlugsConsistentOrder/190_19_0	slugs_decentralized	shields/general_shield	True	-10	False	True	GridWorld	SUNY	FullObsDiscrete	Individual_Q	1.0	0.05	2500000	0	True	IndivQLearningSlugsConsistentOrder/190_19_0_slugs_decentralized	slugs_decentralized	shields/general_shield	False	0.05
IndivQLearningSlugsConsistentOrder/190_19_0	slugs_decentralized	shields/general_shield	True	-10	False	True	GridWorld	SUNY	FullObsDiscrete	Individual_Q	1.0	0.05	2500000	0	True	IndivQLearningSlugsConsistentOrder/190_19_0_none	none			0.05
IndivQLearningSlugsConsistentOrder/191_19_1	slugs_decentralized	shields/general_shield	True	-10	False	True	GridWorld	SUNY	FullObsDiscrete	Individual_Q	1.0	0.05	2500000	1	True	IndivQLearningSlugsConsistentOrder/191_19_1_slugs_centralized	slugs_centralized	shields/general_shield		0.05
IndivQLearningSlugsConsistentOrder/191_19_1	slugs_decentralized	shields/general_shield	True	-10	False	True	GridWorld	SUNY	FullObsDiscrete	Individual_Q	1.0	0.05	2500000	1	True	IndivQLearningSlugsConsistentOrder/191_19_1_slugs_decentralized	slugs_decentralized	shields/general_shield	False	0.05
IndivQLearningSlugsConsistentOrder/191_19_1	slugs_decentralized	shields/general_shield	True	-10	False	True	GridWorld	SUNY	FullObsDiscrete	Individual_Q	1.0	0.05	2500000	1	True	IndivQLearningSlugsConsistentOrder/191_19_1_none	none			0.05
IndivQLearningSlugsConsistentOrder/192_19_2	slugs_decentralized	shields/general_shield	True	-10	False	True	GridWorld	SUNY	FullObsDiscrete	Individual_Q	1.0	0.05	2500000	2	True	IndivQLearningSlugsConsistentOrder/192_19_2_slugs_centralized	slugs_centralized	shields/general_shield		0.05
IndivQLearningSlugsConsistentOrder/192_19_2	slugs_decentralized	shields/general_shield	True	-10	False	True	GridWorld	SUNY	FullObsDiscrete	Individual_Q	1.0	0.05	2500000	2	True	IndivQLearningSlugsConsistentOrder/192_19_2_slugs_decentralized	slugs_decentralized	shields/general_shield	False	0.05
IndivQLearningSlugsConsistentOrder/192_19_2	slugs_decentralized	shields/general_shield	True	-10	False	True	GridWorld	SUNY	FullObsDiscrete	Individual_Q	1.0	0.05	2500000	2	True	IndivQLearningSlugsConsistentOrder/192_19_2_none	none			0.05
IndivQLearningSlugsConsistentOrder/193_19_3	slugs_decentralized	shields/general_shield	True	-10	False	True	GridWorld	SUNY	FullObsDiscrete	Individual_Q	1.0	0.05	2500000	3	True	IndivQLearningSlugsConsistentOrder/193_19_3_slugs_centralized	slugs_centralized	shields/general_shield		0.05
IndivQLearningSlugsConsistentOrder/193_19_3	slugs_decentralized	shields/general_shield	True	-10	False	True	GridWorld	SUNY	FullObsDiscrete	Individual_Q	1.0	0.05	2500000	3	True	IndivQLearningSlugsConsistentOrder/193_19_3_slugs_decentralized	slugs_decentralized	shields/general_shield	False	0.05
IndivQLearningSlugsConsistentOrder/193_19_3	slugs_decentralized	shields/general_shield	True	-10	False	True	GridWorld	SUNY	FullObsDiscrete	Individual_Q	1.0	0.05	2500000	3	True	IndivQLearningSlugsConsistentOrder/193_19_3_none	none			0.05
IndivQLearningSlugsConsistentOrder/194_19_4	slugs_decentralized	shields/general_shield	True	-10	False	True	GridWorld	SUNY	FullObsDiscrete	Individual_Q	1.0	0.05	2500000	4	True	IndivQLearningSlugsConsistentOrder/194_19_4_slugs_centralized	slugs_centralized	shields/general_shield		0.05
IndivQLearningSlugsConsistentOrder/194_19_4	slugs_decentralized	shields/general_shield	True	-10	False	True	GridWorld	SUNY	FullObsDiscrete	Individual_Q	1.0	0.05	2500000	4	True	IndivQLearningSlugsConsistentOrder/194_19_4_slugs_decentralized	slugs_decentralized	shields/general_shield	False	0.05
IndivQLearningSlugsConsistentOrder/194_19_4	slugs_decentralized	shields/general_shield	True	-10	False	True	GridWorld	SUNY	FullObsDiscrete	Individual_Q	1.0	0.05	2500000	4	True	IndivQLearningSlugsConsistentOrder/194_19_4_none	none			0.05
IndivQLearningSlugsConsistentOrder/195_19_5	slugs_decentralized	shields/general_shield	True	-10	False	True	GridWorld	SUNY	FullObsDiscrete	Individual_Q	1.0	0.05	2500000	5	True	IndivQLearningSlugsConsistentOrder/195_19_5_slugs_centralized	slugs_centralized	shields/general_shield		0.05
IndivQLearningSlugsConsistentOrder/195_19_5	slugs_decentralized	shields/general_shield	True	-10	False	True	GridWorld	SUNY	FullObsDiscrete	Individual_Q	1.0	0.05	2500000	5	True	IndivQLearningSlugsConsistentOrder/195_19_5_slugs_decentralized	slugs_decentralized	shields/general_shield	False	0.05
IndivQLearningSlugsConsistentOrder/195_19_5	slugs_decentralized	shields/general_shield	True	-10	False	True	GridWorld	SUNY	FullObsDiscrete	Individual_Q	1.0	0.05	2500000	5	True	IndivQLearningSlugsConsistentOrder/195_19_5_none	none			0.05
IndivQLearningSlugsConsistentOrder/196_19_6	slugs_decentralized	shields/general_shield	True	-10	False	True	GridWorld	SUNY	FullObsDiscrete	Individual_Q	1.0	0.05	2500000	6	True	IndivQLearningSlugsConsistentOrder/196_19_6_slugs_centralized	slugs_centralized	shields/general_shield		0.05
IndivQLearningSlugsConsistentOrder/196_19_6	slugs_decentralized	shields/general_shield	True	-10	False	True	GridWorld	SUNY	FullObsDiscrete	Individual_Q	1.0	0.05	2500000	6	True	IndivQLearningSlugsConsistentOrder/196_19_6_slugs_decentralized	slugs_decentralized	shields/general_shield	False	0.05
IndivQLearningSlugsConsistentOrder/196_19_6	slugs_decentralized	shields/general_shield	True	-10	False	True	GridWorld	SUNY	FullObsDiscrete	Individual_Q	1.0	0.05	2500000	6	True	IndivQLearningSlugsConsistentOrder/196_19_6_none	none			0.05
IndivQLearningSlugsConsistentOrder/197_19_7	slugs_decentralized	shields/general_shield	True	-10	False	True	GridWorld	SUNY	FullObsDiscrete	Individual_Q	1.0	0.05	2500000	7	True	IndivQLearningSlugsConsistentOrder/197_19_7_slugs_centralized	slugs_centralized	shields/general_shield		0.05
IndivQLearningSlugsConsistentOrder/197_19_7	slugs_decentralized	shields/general_shield	True	-10	False	True	GridWorld	SUNY	FullObsDiscrete	Individual_Q	1.0	0.05	2500000	7	True	IndivQLearningSlugsConsistentOrder/197_19_7_slugs_decentralized	slugs_decentralized	shields/general_shield	False	0.05
IndivQLearningSlugsConsistentOrder/197_19_7	slugs_decentralized	shields/general_shield	True	-10	False	True	GridWorld	SUNY	FullObsDiscrete	Individual_Q	1.0	0.05	2500000	7	True	IndivQLearningSlugsConsistentOrder/197_19_7_none	none			0.05
IndivQLearningSlugsConsistentOrder/198_19_8	slugs_decentralized	shields/general_shield	True	-10	False	True	GridWorld	SUNY	FullObsDiscrete	Individual_Q	1.0	0.05	2500000	8	True	IndivQLearningSlugsConsistentOrder/198_19_8_slugs_centralized	slugs_centralized	shields/general_shield		0.05
IndivQLearningSlugsConsistentOrder/198_19_8	slugs_decentralized	shields/general_shield	True	-10	False	True	GridWorld	SUNY	FullObsDiscrete	Individual_Q	1.0	0.05	2500000	8	True	IndivQLearningSlugsConsistentOrder/198_19_8_slugs_decentralized	slugs_decentralized	shields/general_shield	False	0.05
IndivQLearningSlugsConsistentOrder/198_19_8	slugs_decentralized	shields/general_shield	True	-10	False	True	GridWorld	SUNY	FullObsDiscrete	Individual_Q	1.0	0.05	2500000	8	True	IndivQLearningSlugsConsistentOrder/198_19_8_none	none			0.05
IndivQLearningSlugsConsistentOrder/199_19_9	slugs_decentralized	shields/general_shield	True	-10	False	True	GridWorld	SUNY	FullObsDiscrete	Individual_Q	1.0	0.05	2500000	9	True	IndivQLearningSlugsConsistentOrder/199_19_9_slugs_centralized	slugs_centralized	shields/general_shield		0.05
IndivQLearningSlugsConsistentOrder/199_19_9	slugs_decentralized	shields/general_shield	True	-10	False	True	GridWorld	SUNY	FullObsDiscrete	Individual_Q	1.0	0.05	2500000	9	True	IndivQLearningSlugsConsistentOrder/199_19_9_slugs_decentralized	slugs_decentralized	shields/general_shield	False	0.05
IndivQLearningSlugsConsistentOrder/199_19_9	slugs_decentralized	shields/general_shield	True	-10	False	True	GridWorld	SUNY	FullObsDiscrete	Individual_Q	1.0	0.05	2500000	9	True	IndivQLearningSlugsConsistentOrder/199_19_9_none	none			0.05
IndivQLearningSlugsConsistentOrder/200_20_0	none		True	-10		True	GridWorld	SUNY	FullObsDiscrete	Individual_Q	1.0	0.05	2500000	0	True	IndivQLearningSlugsConsistentOrder/200_20_0_slugs_centralized	slugs_centralized	shields/general_shield		0.05
IndivQLearningSlugsConsistentOrder/200_20_0	none		True	-10		True	GridWorld	SUNY	FullObsDiscrete	Individual_Q	1.0	0.05	2500000	0	True	IndivQLearningSlugsConsistentOrder/200_20_0_slugs_decentralized	slugs_decentralized	shields/general_shield	False	0.05
IndivQLearningSlugsConsistentOrder/200_20_0	none		True	-10		True	GridWorld	SUNY	FullObsDiscrete	Individual_Q	1.0	0.05	2500000	0	True	IndivQLearningSlugsConsistentOrder/200_20_0_none	none			0.05
IndivQLearningSlugsConsistentOrder/201_20_1	none		True	-10		True	GridWorld	SUNY	FullObsDiscrete	Individual_Q	1.0	0.05	2500000	1	True	IndivQLearningSlugsConsistentOrder/201_20_1_slugs_centralized	slugs_centralized	shields/general_shield		0.05
IndivQLearningSlugsConsistentOrder/201_20_1	none		True	-10		True	GridWorld	SUNY	FullObsDiscrete	Individual_Q	1.0	0.05	2500000	1	True	IndivQLearningSlugsConsistentOrder/201_20_1_slugs_decentralized	slugs_decentralized	shields/general_shield	False	0.05
IndivQLearningSlugsConsistentOrder/201_20_1	none		True	-10		True	GridWorld	SUNY	FullObsDiscrete	Individual_Q	1.0	0.05	2500000	1	True	IndivQLearningSlugsConsistentOrder/201_20_1_none	none			0.05
IndivQLearningSlugsConsistentOrder/202_20_2	none		True	-10		True	GridWorld	SUNY	FullObsDiscrete	Individual_Q	1.0	0.05	2500000	2	True	IndivQLearningSlugsConsistentOrder/202_20_2_slugs_centralized	slugs_centralized	shields/general_shield		0.05
IndivQLearningSlugsConsistentOrder/202_20_2	none		True	-10		True	GridWorld	SUNY	FullObsDiscrete	Individual_Q	1.0	0.05	2500000	2	True	IndivQLearningSlugsConsistentOrder/202_20_2_slugs_decentralized	slugs_decentralized	shields/general_shield	False	0.05
IndivQLearningSlugsConsistentOrder/202_20_2	none		True	-10		True	GridWorld	SUNY	FullObsDiscrete	Individual_Q	1.0	0.05	2500000	2	True	IndivQLearningSlugsConsistentOrder/202_20_2_none	none			0.05
IndivQLearningSlugsConsistentOrder/203_20_3	none		True	-10		True	GridWorld	SUNY	FullObsDiscrete	Individual_Q	1.0	0.05	2500000	3	True	IndivQLearningSlugsConsistentOrder/203_20_3_slugs_centralized	slugs_centralized	shields/general_shield		0.05
IndivQLearningSlugsConsistentOrder/203_20_3	none		True	-10		True	GridWorld	SUNY	FullObsDiscrete	Individual_Q	1.0	0.05	2500000	3	True	IndivQLearningSlugsConsistentOrder/203_20_3_slugs_decentralized	slugs_decentralized	shields/general_shield	False	0.05
IndivQLearningSlugsConsistentOrder/203_20_3	none		True	-10		True	GridWorld	SUNY	FullObsDiscrete	Individual_Q	1.0	0.05	2500000	3	True	IndivQLearningSlugsConsistentOrder/203_20_3_none	none			0.05
IndivQLearningSlugsConsistentOrder/204_20_4	none		True	-10		True	GridWorld	SUNY	FullObsDiscrete	Individual_Q	1.0	0.05	2500000	4	True	IndivQLearningSlugsConsistentOrder/204_20_4_slugs_centralized	slugs_centralized	shields/general_shield		0.05
IndivQLearningSlugsConsistentOrder/204_20_4	none		True	-10		True	GridWorld	SUNY	FullObsDiscrete	Individual_Q	1.0	0.05	2500000	4	True	IndivQLearningSlugsConsistentOrder/204_20_4_slugs_decentralized	slugs_decentralized	shields/general_shield	False	0.05
IndivQLearningSlugsConsistentOrder/204_20_4	none		True	-10		True	GridWorld	SUNY	FullObsDiscrete	Individual_Q	1.0	0.05	2500000	4	True	IndivQLearningSlugsConsistentOrder/204_20_4_none	none			0.05
IndivQLearningSlugsConsistentOrder/205_20_5	none		True	-10		True	GridWorld	SUNY	FullObsDiscrete	Individual_Q	1.0	0.05	2500000	5	True	IndivQLearningSlugsConsistentOrder/205_20_5_slugs_centralized	slugs_centralized	shields/general_shield		0.05
IndivQLearningSlugsConsistentOrder/205_20_5	none		True	-10		True	GridWorld	SUNY	FullObsDiscrete	Individual_Q	1.0	0.05	2500000	5	True	IndivQLearningSlugsConsistentOrder/205_20_5_slugs_decentralized	slugs_decentralized	shields/general_shield	False	0.05
IndivQLearningSlugsConsistentOrder/205_20_5	none		True	-10		True	GridWorld	SUNY	FullObsDiscrete	Individual_Q	1.0	0.05	2500000	5	True	IndivQLearningSlugsConsistentOrder/205_20_5_none	none			0.05
IndivQLearningSlugsConsistentOrder/206_20_6	none		True	-10		True	GridWorld	SUNY	FullObsDiscrete	Individual_Q	1.0	0.05	2500000	6	True	IndivQLearningSlugsConsistentOrder/206_20_6_slugs_centralized	slugs_centralized	shields/general_shield		0.05
IndivQLearningSlugsConsistentOrder/206_20_6	none		True	-10		True	GridWorld	SUNY	FullObsDiscrete	Individual_Q	1.0	0.05	2500000	6	True	IndivQLearningSlugsConsistentOrder/206_20_6_slugs_decentralized	slugs_decentralized	shields/general_shield	False	0.05
IndivQLearningSlugsConsistentOrder/206_20_6	none		True	-10		True	GridWorld	SUNY	FullObsDiscrete	Individual_Q	1.0	0.05	2500000	6	True	IndivQLearningSlugsConsistentOrder/206_20_6_none	none			0.05
IndivQLearningSlugsConsistentOrder/207_20_7	none		True	-10		True	GridWorld	SUNY	FullObsDiscrete	Individual_Q	1.0	0.05	2500000	7	True	IndivQLearningSlugsConsistentOrder/207_20_7_slugs_centralized	slugs_centralized	shields/general_shield		0.05
IndivQLearningSlugsConsistentOrder/207_20_7	none		True	-10		True	GridWorld	SUNY	FullObsDiscrete	Individual_Q	1.0	0.05	2500000	7	True	IndivQLearningSlugsConsistentOrder/207_20_7_slugs_decentralized	slugs_decentralized	shields/general_shield	False	0.05
IndivQLearningSlugsConsistentOrder/207_20_7	none		True	-10		True	GridWorld	SUNY	FullObsDiscrete	Individual_Q	1.0	0.05	2500000	7	True	IndivQLearningSlugsConsistentOrder/207_20_7_none	none			0.05
IndivQLearningSlugsConsistentOrder/208_20_8	none		True	-10		True	GridWorld	SUNY	FullObsDiscrete	Individual_Q	1.0	0.05	2500000	8	True	IndivQLearningSlugsConsistentOrder/208_20_8_slugs_centralized	slugs_centralized	shields/general_shield		0.05
IndivQLearningSlugsConsistentOrder/208_20_8	none		True	-10		True	GridWorld	SUNY	FullObsDiscrete	Individual_Q	1.0	0.05	2500000	8	True	IndivQLearningSlugsConsistentOrder/208_20_8_slugs_decentralized	slugs_decentralized	shields/general_shield	False	0.05
IndivQLearningSlugsConsistentOrder/208_20_8	none		True	-10		True	GridWorld	SUNY	FullObsDiscrete	Individual_Q	1.0	0.05	2500000	8	True	IndivQLearningSlugsConsistentOrder/208_20_8_none	none			0.05
IndivQLearningSlugsConsistentOrder/209_20_9	none		True	-10		True	GridWorld	SUNY	FullObsDiscrete	Individual_Q	1.0	0.05	2500000	9	True	IndivQLearningSlugsConsistentOrder/209_20_9_slugs_centralized	slugs_centralized	shields/general_shield		0.05
IndivQLearningSlugsConsistentOrder/209_20_9	none		True	-10		True	GridWorld	SUNY	FullObsDiscrete	Individual_Q	1.0	0.05	2500000	9	True	IndivQLearningSlugsConsistentOrder/209_20_9_slugs_decentralized	slugs_decentralized	shields/general_shield	False	0.05
IndivQLearningSlugsConsistentOrder/209_20_9	none		True	-10		True	GridWorld	SUNY	FullObsDiscrete	Individual_Q	1.0	0.05	2500000	9	True	IndivQLearningSlugsConsistentOrder/209_20_9_none	none			0.05
IndivQLearningSlugsConsistentOrder/210_21_0	slugs_centralized	shields/general_shield	True	-10		False	GridWorld	SUNY	FullObsDiscrete	Individual_Q	1.0	0.05	2500000	0	True	IndivQLearningSlugsConsistentOrder/210_21_0_slugs_centralized	slugs_centralized	shields/general_shield		0.05
IndivQLearningSlugsConsistentOrder/210_21_0	slugs_centralized	shields/general_shield	True	-10		False	GridWorld	SUNY	FullObsDiscrete	Individual_Q	1.0	0.05	2500000	0	True	IndivQLearningSlugsConsistentOrder/210_21_0_slugs_decentralized	slugs_decentralized	shields/general_shield	False	0.05
IndivQLearningSlugsConsistentOrder/210_21_0	slugs_centralized	shields/general_shield	True	-10		False	GridWorld	SUNY	FullObsDiscrete	Individual_Q	1.0	0.05	2500000	0	True	IndivQLearningSlugsConsistentOrder/210_21_0_none	none			0.05
IndivQLearningSlugsConsistentOrder/211_21_1	slugs_centralized	shields/general_shield	True	-10		False	GridWorld	SUNY	FullObsDiscrete	Individual_Q	1.0	0.05	2500000	1	True	IndivQLearningSlugsConsistentOrder/211_21_1_slugs_centralized	slugs_centralized	shields/general_shield		0.05
IndivQLearningSlugsConsistentOrder/211_21_1	slugs_centralized	shields/general_shield	True	-10		False	GridWorld	SUNY	FullObsDiscrete	Individual_Q	1.0	0.05	2500000	1	True	IndivQLearningSlugsConsistentOrder/211_21_1_slugs_decentralized	slugs_decentralized	shields/general_shield	False	0.05
IndivQLearningSlugsConsistentOrder/211_21_1	slugs_centralized	shields/general_shield	True	-10		False	GridWorld	SUNY	FullObsDiscrete	Individual_Q	1.0	0.05	2500000	1	True	IndivQLearningSlugsConsistentOrder/211_21_1_none	none			0.05
IndivQLearningSlugsConsistentOrder/212_21_2	slugs_centralized	shields/general_shield	True	-10		False	GridWorld	SUNY	FullObsDiscrete	Individual_Q	1.0	0.05	2500000	2	True	IndivQLearningSlugsConsistentOrder/212_21_2_slugs_centralized	slugs_centralized	shields/general_shield		0.05
IndivQLearningSlugsConsistentOrder/212_21_2	slugs_centralized	shields/general_shield	True	-10		False	GridWorld	SUNY	FullObsDiscrete	Individual_Q	1.0	0.05	2500000	2	True	IndivQLearningSlugsConsistentOrder/212_21_2_slugs_decentralized	slugs_decentralized	shields/general_shield	False	0.05
IndivQLearningSlugsConsistentOrder/212_21_2	slugs_centralized	shields/general_shield	True	-10		False	GridWorld	SUNY	FullObsDiscrete	Individual_Q	1.0	0.05	2500000	2	True	IndivQLearningSlugsConsistentOrder/212_21_2_none	none			0.05
IndivQLearningSlugsConsistentOrder/213_21_3	slugs_centralized	shields/general_shield	True	-10		False	GridWorld	SUNY	FullObsDiscrete	Individual_Q	1.0	0.05	2500000	3	True	IndivQLearningSlugsConsistentOrder/213_21_3_slugs_centralized	slugs_centralized	shields/general_shield		0.05
IndivQLearningSlugsConsistentOrder/213_21_3	slugs_centralized	shields/general_shield	True	-10		False	GridWorld	SUNY	FullObsDiscrete	Individual_Q	1.0	0.05	2500000	3	True	IndivQLearningSlugsConsistentOrder/213_21_3_slugs_decentralized	slugs_decentralized	shields/general_shield	False	0.05
IndivQLearningSlugsConsistentOrder/213_21_3	slugs_centralized	shields/general_shield	True	-10		False	GridWorld	SUNY	FullObsDiscrete	Individual_Q	1.0	0.05	2500000	3	True	IndivQLearningSlugsConsistentOrder/213_21_3_none	none			0.05
IndivQLearningSlugsConsistentOrder/214_21_4	slugs_centralized	shields/general_shield	True	-10		False	GridWorld	SUNY	FullObsDiscrete	Individual_Q	1.0	0.05	2500000	4	True	IndivQLearningSlugsConsistentOrder/214_21_4_slugs_centralized	slugs_centralized	shields/general_shield		0.05
IndivQLearningSlugsConsistentOrder/214_21_4	slugs_centralized	shields/general_shield	True	-10		False	GridWorld	SUNY	FullObsDiscrete	Individual_Q	1.0	0.05	2500000	4	True	IndivQLearningSlugsConsistentOrder/214_21_4_slugs_decentralized	slugs_decentralized	shields/general_shield	False	0.05
IndivQLearningSlugsConsistentOrder/214_21_4	slugs_centralized	shields/general_shield	True	-10		False	GridWorld	SUNY	FullObsDiscrete	Individual_Q	1.0	0.05	2500000	4	True	IndivQLearningSlugsConsistentOrder/214_21_4_none	none			0.05
IndivQLearningSlugsConsistentOrder/215_21_5	slugs_centralized	shields/general_shield	True	-10		False	GridWorld	SUNY	FullObsDiscrete	Individual_Q	1.0	0.05	2500000	5	True	IndivQLearningSlugsConsistentOrder/215_21_5_slugs_centralized	slugs_centralized	shields/general_shield		0.05
IndivQLearningSlugsConsistentOrder/215_21_5	slugs_centralized	shields/general_shield	True	-10		False	GridWorld	SUNY	FullObsDiscrete	Individual_Q	1.0	0.05	2500000	5	True	IndivQLearningSlugsConsistentOrder/215_21_5_slugs_decentralized	slugs_decentralized	shields/general_shield	False	0.05
IndivQLearningSlugsConsistentOrder/215_21_5	slugs_centralized	shields/general_shield	True	-10		False	GridWorld	SUNY	FullObsDiscrete	Individual_Q	1.0	0.05	2500000	5	True	IndivQLearningSlugsConsistentOrder/215_21_5_none	none			0.05
IndivQLearningSlugsConsistentOrder/216_21_6	slugs_centralized	shields/general_shield	True	-10		False	GridWorld	SUNY	FullObsDiscrete	Individual_Q	1.0	0.05	2500000	6	True	IndivQLearningSlugsConsistentOrder/216_21_6_slugs_centralized	slugs_centralized	shields/general_shield		0.05
IndivQLearningSlugsConsistentOrder/216_21_6	slugs_centralized	shields/general_shield	True	-10		False	GridWorld	SUNY	FullObsDiscrete	Individual_Q	1.0	0.05	2500000	6	True	IndivQLearningSlugsConsistentOrder/216_21_6_slugs_decentralized	slugs_decentralized	shields/general_shield	False	0.05
IndivQLearningSlugsConsistentOrder/216_21_6	slugs_centralized	shields/general_shield	True	-10		False	GridWorld	SUNY	FullObsDiscrete	Individual_Q	1.0	0.05	2500000	6	True	IndivQLearningSlugsConsistentOrder/216_21_6_none	none			0.05
IndivQLearningSlugsConsistentOrder/217_21_7	slugs_centralized	shields/general_shield	True	-10		False	GridWorld	SUNY	FullObsDiscrete	Individual_Q	1.0	0.05	2500000	7	True	IndivQLearningSlugsConsistentOrder/217_21_7_slugs_centralized	slugs_centralized	shields/general_shield		0.05
IndivQLearningSlugsConsistentOrder/217_21_7	slugs_centralized	shields/general_shield	True	-10		False	GridWorld	SUNY	FullObsDiscrete	Individual_Q	1.0	0.05	2500000	7	True	IndivQLearningSlugsConsistentOrder/217_21_7_slugs_decentralized	slugs_decentralized	shields/general_shield	False	0.05
IndivQLearningSlugsConsistentOrder/217_21_7	slugs_centralized	shields/general_shield	True	-10		False	GridWorld	SUNY	FullObsDiscrete	Individual_Q	1.0	0.05	2500000	7	True	IndivQLearningSlugsConsistentOrder/217_21_7_none	none			0.05
IndivQLearningSlugsConsistentOrder/218_21_8	slugs_centralized	shields/general_shield	True	-10		False	GridWorld	SUNY	FullObsDiscrete	Individual_Q	1.0	0.05	2500000	8	True	IndivQLearningSlugsConsistentOrder/218_21_8_slugs_centralized	slugs_centralized	shields/general_shield		0.05
IndivQLearningSlugsConsistentOrder/218_21_8	slugs_centralized	shields/general_shield	True	-10		False	GridWorld	SUNY	FullObsDiscrete	Individual_Q	1.0	0.05	2500000	8	True	IndivQLearningSlugsConsistentOrder/218_21_8_slugs_decentralized	slugs_decentralized	shields/general_shield	False	0.05
IndivQLearningSlugsConsistentOrder/218_21_8	slugs_centralized	shields/general_shield	True	-10		False	GridWorld	SUNY	FullObsDiscrete	Individual_Q	1.0	0.05	2500000	8	True	IndivQLearningSlugsConsistentOrder/218_21_8_none	none			0.05
IndivQLearningSlugsConsistentOrder/219_21_9	slugs_centralized	shields/general_shield	True	-10		False	GridWorld	SUNY	FullObsDiscrete	Individual_Q	1.0	0.05	2500000	9	True	IndivQLearningSlugsConsistentOrder/219_21_9_slugs_centralized	slugs_centralized	shields/general_shield		0.05
IndivQLearningSlugsConsistentOrder/219_21_9	slugs_centralized	shields/general_shield	True	-10		False	GridWorld	SUNY	FullObsDiscrete	Individual_Q	1.0	0.05	2500000	9	True	IndivQLearningSlugsConsistentOrder/219_21_9_slugs_decentralized	slugs_decentralized	shields/general_shield	False	0.05
IndivQLearningSlugsConsistentOrder/219_21_9	slugs_centralized	shields/general_shield	True	-10		False	GridWorld	SUNY	FullObsDiscrete	Individual_Q	1.0	0.05	2500000	9	True	IndivQLearningSlugsConsistentOrder/219_21_9_none	none			0.05
IndivQLearningSlugsConsistentOrder/220_22_0	slugs_decentralized	shields/general_shield	True	-10	False	False	GridWorld	SUNY	FullObsDiscrete	Individual_Q	1.0	0.05	2500000	0	True	IndivQLearningSlugsConsistentOrder/220_22_0_slugs_centralized	slugs_centralized	shields/general_shield		0.05
IndivQLearningSlugsConsistentOrder/220_22_0	slugs_decentralized	shields/general_shield	True	-10	False	False	GridWorld	SUNY	FullObsDiscrete	Individual_Q	1.0	0.05	2500000	0	True	IndivQLearningSlugsConsistentOrder/220_22_0_slugs_decentralized	slugs_decentralized	shields/general_shield	False	0.05
IndivQLearningSlugsConsistentOrder/220_22_0	slugs_decentralized	shields/general_shield	True	-10	False	False	GridWorld	SUNY	FullObsDiscrete	Individual_Q	1.0	0.05	2500000	0	True	IndivQLearningSlugsConsistentOrder/220_22_0_none	none			0.05
IndivQLearningSlugsConsistentOrder/221_22_1	slugs_decentralized	shields/general_shield	True	-10	False	False	GridWorld	SUNY	FullObsDiscrete	Individual_Q	1.0	0.05	2500000	1	True	IndivQLearningSlugsConsistentOrder/221_22_1_slugs_centralized	slugs_centralized	shields/general_shield		0.05
IndivQLearningSlugsConsistentOrder/221_22_1	slugs_decentralized	shields/general_shield	True	-10	False	False	GridWorld	SUNY	FullObsDiscrete	Individual_Q	1.0	0.05	2500000	1	True	IndivQLearningSlugsConsistentOrder/221_22_1_slugs_decentralized	slugs_decentralized	shields/general_shield	False	0.05
IndivQLearningSlugsConsistentOrder/221_22_1	slugs_decentralized	shields/general_shield	True	-10	False	False	GridWorld	SUNY	FullObsDiscrete	Individual_Q	1.0	0.05	2500000	1	True	IndivQLearningSlugsConsistentOrder/221_22_1_none	none			0.05
IndivQLearningSlugsConsistentOrder/222_22_2	slugs_decentralized	shields/general_shield	True	-10	False	False	GridWorld	SUNY	FullObsDiscrete	Individual_Q	1.0	0.05	2500000	2	True	IndivQLearningSlugsConsistentOrder/222_22_2_slugs_centralized	slugs_centralized	shields/general_shield		0.05
IndivQLearningSlugsConsistentOrder/222_22_2	slugs_decentralized	shields/general_shield	True	-10	False	False	GridWorld	SUNY	FullObsDiscrete	Individual_Q	1.0	0.05	2500000	2	True	IndivQLearningSlugsConsistentOrder/222_22_2_slugs_decentralized	slugs_decentralized	shields/general_shield	False	0.05
IndivQLearningSlugsConsistentOrder/222_22_2	slugs_decentralized	shields/general_shield	True	-10	False	False	GridWorld	SUNY	FullObsDiscrete	Individual_Q	1.0	0.05	2500000	2	True	IndivQLearningSlugsConsistentOrder/222_22_2_none	none			0.05
IndivQLearningSlugsConsistentOrder/223_22_3	slugs_decentralized	shields/general_shield	True	-10	False	False	GridWorld	SUNY	FullObsDiscrete	Individual_Q	1.0	0.05	2500000	3	True	IndivQLearningSlugsConsistentOrder/223_22_3_slugs_centralized	slugs_centralized	shields/general_shield		0.05
IndivQLearningSlugsConsistentOrder/223_22_3	slugs_decentralized	shields/general_shield	True	-10	False	False	GridWorld	SUNY	FullObsDiscrete	Individual_Q	1.0	0.05	2500000	3	True	IndivQLearningSlugsConsistentOrder/223_22_3_slugs_decentralized	slugs_decentralized	shields/general_shield	False	0.05
IndivQLearningSlugsConsistentOrder/223_22_3	slugs_decentralized	shields/general_shield	True	-10	False	False	GridWorld	SUNY	FullObsDiscrete	Individual_Q	1.0	0.05	2500000	3	True	IndivQLearningSlugsConsistentOrder/223_22_3_none	none			0.05
IndivQLearningSlugsConsistentOrder/224_22_4	slugs_decentralized	shields/general_shield	True	-10	False	False	GridWorld	SUNY	FullObsDiscrete	Individual_Q	1.0	0.05	2500000	4	True	IndivQLearningSlugsConsistentOrder/224_22_4_slugs_centralized	slugs_centralized	shields/general_shield		0.05
IndivQLearningSlugsConsistentOrder/224_22_4	slugs_decentralized	shields/general_shield	True	-10	False	False	GridWorld	SUNY	FullObsDiscrete	Individual_Q	1.0	0.05	2500000	4	True	IndivQLearningSlugsConsistentOrder/224_22_4_slugs_decentralized	slugs_decentralized	shields/general_shield	False	0.05
IndivQLearningSlugsConsistentOrder/224_22_4	slugs_decentralized	shields/general_shield	True	-10	False	False	GridWorld	SUNY	FullObsDiscrete	Individual_Q	1.0	0.05	2500000	4	True	IndivQLearningSlugsConsistentOrder/224_22_4_none	none			0.05
IndivQLearningSlugsConsistentOrder/225_22_5	slugs_decentralized	shields/general_shield	True	-10	False	False	GridWorld	SUNY	FullObsDiscrete	Individual_Q	1.0	0.05	2500000	5	True	IndivQLearningSlugsConsistentOrder/225_22_5_slugs_centralized	slugs_centralized	shields/general_shield		0.05
IndivQLearningSlugsConsistentOrder/225_22_5	slugs_decentralized	shields/general_shield	True	-10	False	False	GridWorld	SUNY	FullObsDiscrete	Individual_Q	1.0	0.05	2500000	5	True	IndivQLearningSlugsConsistentOrder/225_22_5_slugs_decentralized	slugs_decentralized	shields/general_shield	False	0.05
IndivQLearningSlugsConsistentOrder/225_22_5	slugs_decentralized	shields/general_shield	True	-10	False	False	GridWorld	SUNY	FullObsDiscrete	Individual_Q	1.0	0.05	2500000	5	True	IndivQLearningSlugsConsistentOrder/225_22_5_none	none			0.05
IndivQLearningSlugsConsistentOrder/226_22_6	slugs_decentralized	shields/general_shield	True	-10	False	False	GridWorld	SUNY	FullObsDiscrete	Individual_Q	1.0	0.05	2500000	6	True	IndivQLearningSlugsConsistentOrder/226_22_6_slugs_centralized	slugs_centralized	shields/general_shield		0.05
IndivQLearningSlugsConsistentOrder/226_22_6	slugs_decentralized	shields/general_shield	True	-10	False	False	GridWorld	SUNY	FullObsDiscrete	Individual_Q	1.0	0.05	2500000	6	True	IndivQLearningSlugsConsistentOrder/226_22_6_slugs_decentralized	slugs_decentralized	shields/general_shield	False	0.05
IndivQLearningSlugsConsistentOrder/226_22_6	slugs_decentralized	shields/general_shield	True	-10	False	False	GridWorld	SUNY	FullObsDiscrete	Individual_Q	1.0	0.05	2500000	6	True	IndivQLearningSlugsConsistentOrder/226_22_6_none	none			0.05
IndivQLearningSlugsConsistentOrder/227_22_7	slugs_decentralized	shields/general_shield	True	-10	False	False	GridWorld	SUNY	FullObsDiscrete	Individual_Q	1.0	0.05	2500000	7	True	IndivQLearningSlugsConsistentOrder/227_22_7_slugs_centralized	slugs_centralized	shields/general_shield		0.05
IndivQLearningSlugsConsistentOrder/227_22_7	slugs_decentralized	shields/general_shield	True	-10	False	False	GridWorld	SUNY	FullObsDiscrete	Individual_Q	1.0	0.05	2500000	7	True	IndivQLearningSlugsConsistentOrder/227_22_7_slugs_decentralized	slugs_decentralized	shields/general_shield	False	0.05
IndivQLearningSlugsConsistentOrder/227_22_7	slugs_decentralized	shields/general_shield	True	-10	False	False	GridWorld	SUNY	FullObsDiscrete	Individual_Q	1.0	0.05	2500000	7	True	IndivQLearningSlugsConsistentOrder/227_22_7_none	none			0.05
IndivQLearningSlugsConsistentOrder/228_22_8	slugs_decentralized	shields/general_shield	True	-10	False	False	GridWorld	SUNY	FullObsDiscrete	Individual_Q	1.0	0.05	2500000	8	True	IndivQLearningSlugsConsistentOrder/228_22_8_slugs_centralized	slugs_centralized	shields/general_shield		0.05
IndivQLearningSlugsConsistentOrder/228_22_8	slugs_decentralized	shields/general_shield	True	-10	False	False	GridWorld	SUNY	FullObsDiscrete	Individual_Q	1.0	0.05	2500000	8	True	IndivQLearningSlugsConsistentOrder/228_22_8_slugs_decentralized	slugs_decentralized	shields/general_shield	False	0.05
IndivQLearningSlugsConsistentOrder/228_22_8	slugs_decentralized	shields/general_shield	True	-10	False	False	GridWorld	SUNY	FullObsDiscrete	Individual_Q	1.0	0.05	2500000	8	True	IndivQLearningSlugsConsistentOrder/228_22_8_none	none			0.05
IndivQLearningSlugsConsistentOrder/229_22_9	slugs_decentralized	shields/general_shield	True	-10	False	False	GridWorld	SUNY	FullObsDiscrete	Individual_Q	1.0	0.05	2500000	9	True	IndivQLearningSlugsConsistentOrder/229_22_9_slugs_centralized	slugs_centralized	shields/general_shield		0.05
IndivQLearningSlugsConsistentOrder/229_22_9	slugs_decentralized	shields/general_shield	True	-10	False	False	GridWorld	SUNY	FullObsDiscrete	Individual_Q	1.0	0.05	2500000	9	True	IndivQLearningSlugsConsistentOrder/229_22_9_slugs_decentralized	slugs_decentralized	shields/general_shield	False	0.05
IndivQLearningSlugsConsistentOrder/229_22_9	slugs_decentralized	shields/general_shield	True	-10	False	False	GridWorld	SUNY	FullObsDiscrete	Individual_Q	1.0	0.05	2500000	9	True	IndivQLearningSlugsConsistentOrder/229_22_9_none	none			0.05
IndivQLearningSlugsConsistentOrder/230_23_0	none		True	-10		False	GridWorld	SUNY	FullObsDiscrete	Individual_Q	1.0	0.05	2500000	0	True	IndivQLearningSlugsConsistentOrder/230_23_0_slugs_centralized	slugs_centralized	shields/general_shield		0.05
IndivQLearningSlugsConsistentOrder/230_23_0	none		True	-10		False	GridWorld	SUNY	FullObsDiscrete	Individual_Q	1.0	0.05	2500000	0	True	IndivQLearningSlugsConsistentOrder/230_23_0_slugs_decentralized	slugs_decentralized	shields/general_shield	False	0.05
IndivQLearningSlugsConsistentOrder/230_23_0	none		True	-10		False	GridWorld	SUNY	FullObsDiscrete	Individual_Q	1.0	0.05	2500000	0	True	IndivQLearningSlugsConsistentOrder/230_23_0_none	none			0.05
IndivQLearningSlugsConsistentOrder/231_23_1	none		True	-10		False	GridWorld	SUNY	FullObsDiscrete	Individual_Q	1.0	0.05	2500000	1	True	IndivQLearningSlugsConsistentOrder/231_23_1_slugs_centralized	slugs_centralized	shields/general_shield		0.05
IndivQLearningSlugsConsistentOrder/231_23_1	none		True	-10		False	GridWorld	SUNY	FullObsDiscrete	Individual_Q	1.0	0.05	2500000	1	True	IndivQLearningSlugsConsistentOrder/231_23_1_slugs_decentralized	slugs_decentralized	shields/general_shield	False	0.05
IndivQLearningSlugsConsistentOrder/231_23_1	none		True	-10		False	GridWorld	SUNY	FullObsDiscrete	Individual_Q	1.0	0.05	2500000	1	True	IndivQLearningSlugsConsistentOrder/231_23_1_none	none			0.05
IndivQLearningSlugsConsistentOrder/232_23_2	none		True	-10		False	GridWorld	SUNY	FullObsDiscrete	Individual_Q	1.0	0.05	2500000	2	True	IndivQLearningSlugsConsistentOrder/232_23_2_slugs_centralized	slugs_centralized	shields/general_shield		0.05
IndivQLearningSlugsConsistentOrder/232_23_2	none		True	-10		False	GridWorld	SUNY	FullObsDiscrete	Individual_Q	1.0	0.05	2500000	2	True	IndivQLearningSlugsConsistentOrder/232_23_2_slugs_decentralized	slugs_decentralized	shields/general_shield	False	0.05
IndivQLearningSlugsConsistentOrder/232_23_2	none		True	-10		False	GridWorld	SUNY	FullObsDiscrete	Individual_Q	1.0	0.05	2500000	2	True	IndivQLearningSlugsConsistentOrder/232_23_2_none	none			0.05
IndivQLearningSlugsConsistentOrder/233_23_3	none		True	-10		False	GridWorld	SUNY	FullObsDiscrete	Individual_Q	1.0	0.05	2500000	3	True	IndivQLearningSlugsConsistentOrder/233_23_3_slugs_centralized	slugs_centralized	shields/general_shield		0.05
IndivQLearningSlugsConsistentOrder/233_23_3	none		True	-10		False	GridWorld	SUNY	FullObsDiscrete	Individual_Q	1.0	0.05	2500000	3	True	IndivQLearningSlugsConsistentOrder/233_23_3_slugs_decentralized	slugs_decentralized	shields/general_shield	False	0.05
IndivQLearningSlugsConsistentOrder/233_23_3	none		True	-10		False	GridWorld	SUNY	FullObsDiscrete	Individual_Q	1.0	0.05	2500000	3	True	IndivQLearningSlugsConsistentOrder/233_23_3_none	none			0.05
IndivQLearningSlugsConsistentOrder/234_23_4	none		True	-10		False	GridWorld	SUNY	FullObsDiscrete	Individual_Q	1.0	0.05	2500000	4	True	IndivQLearningSlugsConsistentOrder/234_23_4_slugs_centralized	slugs_centralized	shields/general_shield		0.05
IndivQLearningSlugsConsistentOrder/234_23_4	none		True	-10		False	GridWorld	SUNY	FullObsDiscrete	Individual_Q	1.0	0.05	2500000	4	True	IndivQLearningSlugsConsistentOrder/234_23_4_slugs_decentralized	slugs_decentralized	shields/general_shield	False	0.05
IndivQLearningSlugsConsistentOrder/234_23_4	none		True	-10		False	GridWorld	SUNY	FullObsDiscrete	Individual_Q	1.0	0.05	2500000	4	True	IndivQLearningSlugsConsistentOrder/234_23_4_none	none			0.05
IndivQLearningSlugsConsistentOrder/235_23_5	none		True	-10		False	GridWorld	SUNY	FullObsDiscrete	Individual_Q	1.0	0.05	2500000	5	True	IndivQLearningSlugsConsistentOrder/235_23_5_slugs_centralized	slugs_centralized	shields/general_shield		0.05
IndivQLearningSlugsConsistentOrder/235_23_5	none		True	-10		False	GridWorld	SUNY	FullObsDiscrete	Individual_Q	1.0	0.05	2500000	5	True	IndivQLearningSlugsConsistentOrder/235_23_5_slugs_decentralized	slugs_decentralized	shields/general_shield	False	0.05
IndivQLearningSlugsConsistentOrder/235_23_5	none		True	-10		False	GridWorld	SUNY	FullObsDiscrete	Individual_Q	1.0	0.05	2500000	5	True	IndivQLearningSlugsConsistentOrder/235_23_5_none	none			0.05
IndivQLearningSlugsConsistentOrder/236_23_6	none		True	-10		False	GridWorld	SUNY	FullObsDiscrete	Individual_Q	1.0	0.05	2500000	6	True	IndivQLearningSlugsConsistentOrder/236_23_6_slugs_centralized	slugs_centralized	shields/general_shield		0.05
IndivQLearningSlugsConsistentOrder/236_23_6	none		True	-10		False	GridWorld	SUNY	FullObsDiscrete	Individual_Q	1.0	0.05	2500000	6	True	IndivQLearningSlugsConsistentOrder/236_23_6_slugs_decentralized	slugs_decentralized	shields/general_shield	False	0.05
IndivQLearningSlugsConsistentOrder/236_23_6	none		True	-10		False	GridWorld	SUNY	FullObsDiscrete	Individual_Q	1.0	0.05	2500000	6	True	IndivQLearningSlugsConsistentOrder/236_23_6_none	none			0.05
IndivQLearningSlugsConsistentOrder/237_23_7	none		True	-10		False	GridWorld	SUNY	FullObsDiscrete	Individual_Q	1.0	0.05	2500000	7	True	IndivQLearningSlugsConsistentOrder/237_23_7_slugs_centralized	slugs_centralized	shields/general_shield		0.05
IndivQLearningSlugsConsistentOrder/237_23_7	none		True	-10		False	GridWorld	SUNY	FullObsDiscrete	Individual_Q	1.0	0.05	2500000	7	True	IndivQLearningSlugsConsistentOrder/237_23_7_slugs_decentralized	slugs_decentralized	shields/general_shield	False	0.05
IndivQLearningSlugsConsistentOrder/237_23_7	none		True	-10		False	GridWorld	SUNY	FullObsDiscrete	Individual_Q	1.0	0.05	2500000	7	True	IndivQLearningSlugsConsistentOrder/237_23_7_none	none			0.05
IndivQLearningSlugsConsistentOrder/238_23_8	none		True	-10		False	GridWorld	SUNY	FullObsDiscrete	Individual_Q	1.0	0.05	2500000	8	True	IndivQLearningSlugsConsistentOrder/238_23_8_slugs_centralized	slugs_centralized	shields/general_shield		0.05
IndivQLearningSlugsConsistentOrder/238_23_8	none		True	-10		False	GridWorld	SUNY	FullObsDiscrete	Individual_Q	1.0	0.05	2500000	8	True	IndivQLearningSlugsConsistentOrder/238_23_8_slugs_decentralized	slugs_decentralized	shields/general_shield	False	0.05
IndivQLearningSlugsConsistentOrder/238_23_8	none		True	-10		False	GridWorld	SUNY	FullObsDiscrete	Individual_Q	1.0	0.05	2500000	8	True	IndivQLearningSlugsConsistentOrder/238_23_8_none	none			0.05
IndivQLearningSlugsConsistentOrder/239_23_9	none		True	-10		False	GridWorld	SUNY	FullObsDiscrete	Individual_Q	1.0	0.05	2500000	9	True	IndivQLearningSlugsConsistentOrder/239_23_9_slugs_centralized	slugs_centralized	shields/general_shield		0.05
IndivQLearningSlugsConsistentOrder/239_23_9	none		True	-10		False	GridWorld	SUNY	FullObsDiscrete	Individual_Q	1.0	0.05	2500000	9	True	IndivQLearningSlugsConsistentOrder/239_23_9_slugs_decentralized	slugs_decentralized	shields/general_shield	False	0.05
IndivQLearningSlugsConsistentOrder/239_23_9	none		True	-10		False	GridWorld	SUNY	FullObsDiscrete	Individual_Q	1.0	0.05	2500000	9	True	IndivQLearningSlugsConsistentOrder/239_23_9_none	none			0.05
