# Supplementary material
Source: ML conference proceedings conference paper supplement (https://proceedings.neurips.cc/paper_files/paper/2022/hash/57444e14ecd9e2c8f603b4f012ce3811-Abstract.html)
Supplement: Supplementary file 1 [file 57444e14ecd9e2c8f603b4f012ce3811-Supplemental-Conference.zip › 3410_shield_decentralization_for_sa-Supplementary Material/parallel_configs/IndivQLearningSlugsConsistentOrderTrain.csv]

run_name	shield	shield_specification	punish_unsafe_orig_action	punish_unsafe_orig_action_modifier	shield_decentralized_random_agent_order	randomize_starts	map_type	grid_world_map_name	grid_world_obs_type	learner_type	learner_anneal_eps_start	learner_anneal_eps_finish	max_total_steps	seed	skip_evaluation
IndivQLearningSlugsConsistentOrder/0_0_0	slugs_centralized	shields/general_shield	True	-10		True	GridWorld	Pentagon	FullObsDiscrete	Individual_Q	1.0	0.05	2500000	0	True
IndivQLearningSlugsConsistentOrder/1_0_1	slugs_centralized	shields/general_shield	True	-10		True	GridWorld	Pentagon	FullObsDiscrete	Individual_Q	1.0	0.05	2500000	1	True
IndivQLearningSlugsConsistentOrder/2_0_2	slugs_centralized	shields/general_shield	True	-10		True	GridWorld	Pentagon	FullObsDiscrete	Individual_Q	1.0	0.05	2500000	2	True
IndivQLearningSlugsConsistentOrder/3_0_3	slugs_centralized	shields/general_shield	True	-10		True	GridWorld	Pentagon	FullObsDiscrete	Individual_Q	1.0	0.05	2500000	3	True
IndivQLearningSlugsConsistentOrder/4_0_4	slugs_centralized	shields/general_shield	True	-10		True	GridWorld	Pentagon	FullObsDiscrete	Individual_Q	1.0	0.05	2500000	4	True
IndivQLearningSlugsConsistentOrder/5_0_5	slugs_centralized	shields/general_shield	True	-10		True	GridWorld	Pentagon	FullObsDiscrete	Individual_Q	1.0	0.05	2500000	5	True
IndivQLearningSlugsConsistentOrder/6_0_6	slugs_centralized	shields/general_shield	True	-10		True	GridWorld	Pentagon	FullObsDiscrete	Individual_Q	1.0	0.05	2500000	6	True
IndivQLearningSlugsConsistentOrder/7_0_7	slugs_centralized	shields/general_shield	True	-10		True	GridWorld	Pentagon	FullObsDiscrete	Individual_Q	1.0	0.05	2500000	7	True
IndivQLearningSlugsConsistentOrder/8_0_8	slugs_centralized	shields/general_shield	True	-10		True	GridWorld	Pentagon	FullObsDiscrete	Individual_Q	1.0	0.05	2500000	8	True
IndivQLearningSlugsConsistentOrder/9_0_9	slugs_centralized	shields/general_shield	True	-10		True	GridWorld	Pentagon	FullObsDiscrete	Individual_Q	1.0	0.05	2500000	9	True
IndivQLearningSlugsConsistentOrder/10_1_0	slugs_decentralized	shields/general_shield	True	-10	False	True	GridWorld	Pentagon	FullObsDiscrete	Individual_Q	1.0	0.05	2500000	0	True
IndivQLearningSlugsConsistentOrder/11_1_1	slugs_decentralized	shields/general_shield	True	-10	False	True	GridWorld	Pentagon	FullObsDiscrete	Individual_Q	1.0	0.05	2500000	1	True
IndivQLearningSlugsConsistentOrder/12_1_2	slugs_decentralized	shields/general_shield	True	-10	False	True	GridWorld	Pentagon	FullObsDiscrete	Individual_Q	1.0	0.05	2500000	2	True
IndivQLearningSlugsConsistentOrder/13_1_3	slugs_decentralized	shields/general_shield	True	-10	False	True	GridWorld	Pentagon	FullObsDiscrete	Individual_Q	1.0	0.05	2500000	3	True
IndivQLearningSlugsConsistentOrder/14_1_4	slugs_decentralized	shields/general_shield	True	-10	False	True	GridWorld	Pentagon	FullObsDiscrete	Individual_Q	1.0	0.05	2500000	4	True
IndivQLearningSlugsConsistentOrder/15_1_5	slugs_decentralized	shields/general_shield	True	-10	False	True	GridWorld	Pentagon	FullObsDiscrete	Individual_Q	1.0	0.05	2500000	5	True
IndivQLearningSlugsConsistentOrder/16_1_6	slugs_decentralized	shields/general_shield	True	-10	False	True	GridWorld	Pentagon	FullObsDiscrete	Individual_Q	1.0	0.05	2500000	6	True
IndivQLearningSlugsConsistentOrder/17_1_7	slugs_decentralized	shields/general_shield	True	-10	False	True	GridWorld	Pentagon	FullObsDiscrete	Individual_Q	1.0	0.05	2500000	7	True
IndivQLearningSlugsConsistentOrder/18_1_8	slugs_decentralized	shields/general_shield	True	-10	False	True	GridWorld	Pentagon	FullObsDiscrete	Individual_Q	1.0	0.05	2500000	8	True
IndivQLearningSlugsConsistentOrder/19_1_9	slugs_decentralized	shields/general_shield	True	-10	False	True	GridWorld	Pentagon	FullObsDiscrete	Individual_Q	1.0	0.05	2500000	9	True
IndivQLearningSlugsConsistentOrder/20_2_0	none		True	-10		True	GridWorld	Pentagon	FullObsDiscrete	Individual_Q	1.0	0.05	2500000	0	True
IndivQLearningSlugsConsistentOrder/21_2_1	none		True	-10		True	GridWorld	Pentagon	FullObsDiscrete	Individual_Q	1.0	0.05	2500000	1	True
IndivQLearningSlugsConsistentOrder/22_2_2	none		True	-10		True	GridWorld	Pentagon	FullObsDiscrete	Individual_Q	1.0	0.05	2500000	2	True
IndivQLearningSlugsConsistentOrder/23_2_3	none		True	-10		True	GridWorld	Pentagon	FullObsDiscrete	Individual_Q	1.0	0.05	2500000	3	True
IndivQLearningSlugsConsistentOrder/24_2_4	none		True	-10		True	GridWorld	Pentagon	FullObsDiscrete	Individual_Q	1.0	0.05	2500000	4	True
IndivQLearningSlugsConsistentOrder/25_2_5	none		True	-10		True	GridWorld	Pentagon	FullObsDiscrete	Individual_Q	1.0	0.05	2500000	5	True
IndivQLearningSlugsConsistentOrder/26_2_6	none		True	-10		True	GridWorld	Pentagon	FullObsDiscrete	Individual_Q	1.0	0.05	2500000	6	True
IndivQLearningSlugsConsistentOrder/27_2_7	none		True	-10		True	GridWorld	Pentagon	FullObsDiscrete	Individual_Q	1.0	0.05	2500000	7	True
IndivQLearningSlugsConsistentOrder/28_2_8	none		True	-10		True	GridWorld	Pentagon	FullObsDiscrete	Individual_Q	1.0	0.05	2500000	8	True
IndivQLearningSlugsConsistentOrder/29_2_9	none		True	-10		True	GridWorld	Pentagon	FullObsDiscrete	Individual_Q	1.0	0.05	2500000	9	True
IndivQLearningSlugsConsistentOrder/30_3_0	slugs_centralized	shields/general_shield	True	-10		False	GridWorld	Pentagon	FullObsDiscrete	Individual_Q	1.0	0.05	2500000	0	True
IndivQLearningSlugsConsistentOrder/31_3_1	slugs_centralized	shields/general_shield	True	-10		False	GridWorld	Pentagon	FullObsDiscrete	Individual_Q	1.0	0.05	2500000	1	True
IndivQLearningSlugsConsistentOrder/32_3_2	slugs_centralized	shields/general_shield	True	-10		False	GridWorld	Pentagon	FullObsDiscrete	Individual_Q	1.0	0.05	2500000	2	True
IndivQLearningSlugsConsistentOrder/33_3_3	slugs_centralized	shields/general_shield	True	-10		False	GridWorld	Pentagon	FullObsDiscrete	Individual_Q	1.0	0.05	2500000	3	True
IndivQLearningSlugsConsistentOrder/34_3_4	slugs_centralized	shields/general_shield	True	-10		False	GridWorld	Pentagon	FullObsDiscrete	Individual_Q	1.0	0.05	2500000	4	True
IndivQLearningSlugsConsistentOrder/35_3_5	slugs_centralized	shields/general_shield	True	-10		False	GridWorld	Pentagon	FullObsDiscrete	Individual_Q	1.0	0.05	2500000	5	True
IndivQLearningSlugsConsistentOrder/36_3_6	slugs_centralized	shields/general_shield	True	-10		False	GridWorld	Pentagon	FullObsDiscrete	Individual_Q	1.0	0.05	2500000	6	True
IndivQLearningSlugsConsistentOrder/37_3_7	slugs_centralized	shields/general_shield	True	-10		False	GridWorld	Pentagon	FullObsDiscrete	Individual_Q	1.0	0.05	2500000	7	True
IndivQLearningSlugsConsistentOrder/38_3_8	slugs_centralized	shields/general_shield	True	-10		False	GridWorld	Pentagon	FullObsDiscrete	Individual_Q	1.0	0.05	2500000	8	True
IndivQLearningSlugsConsistentOrder/39_3_9	slugs_centralized	shields/general_shield	True	-10		False	GridWorld	Pentagon	FullObsDiscrete	Individual_Q	1.0	0.05	2500000	9	True
IndivQLearningSlugsConsistentOrder/40_4_0	slugs_decentralized	shields/general_shield	True	-10	False	False	GridWorld	Pentagon	FullObsDiscrete	Individual_Q	1.0	0.05	2500000	0	True
IndivQLearningSlugsConsistentOrder/41_4_1	slugs_decentralized	shields/general_shield	True	-10	False	False	GridWorld	Pentagon	FullObsDiscrete	Individual_Q	1.0	0.05	2500000	1	True
IndivQLearningSlugsConsistentOrder/42_4_2	slugs_decentralized	shields/general_shield	True	-10	False	False	GridWorld	Pentagon	FullObsDiscrete	Individual_Q	1.0	0.05	2500000	2	True
IndivQLearningSlugsConsistentOrder/43_4_3	slugs_decentralized	shields/general_shield	True	-10	False	False	GridWorld	Pentagon	FullObsDiscrete	Individual_Q	1.0	0.05	2500000	3	True
IndivQLearningSlugsConsistentOrder/44_4_4	slugs_decentralized	shields/general_shield	True	-10	False	False	GridWorld	Pentagon	FullObsDiscrete	Individual_Q	1.0	0.05	2500000	4	True
IndivQLearningSlugsConsistentOrder/45_4_5	slugs_decentralized	shields/general_shield	True	-10	False	False	GridWorld	Pentagon	FullObsDiscrete	Individual_Q	1.0	0.05	2500000	5	True
IndivQLearningSlugsConsistentOrder/46_4_6	slugs_decentralized	shields/general_shield	True	-10	False	False	GridWorld	Pentagon	FullObsDiscrete	Individual_Q	1.0	0.05	2500000	6	True
IndivQLearningSlugsConsistentOrder/47_4_7	slugs_decentralized	shields/general_shield	True	-10	False	False	GridWorld	Pentagon	FullObsDiscrete	Individual_Q	1.0	0.05	2500000	7	True
IndivQLearningSlugsConsistentOrder/48_4_8	slugs_decentralized	shields/general_shield	True	-10	False	False	GridWorld	Pentagon	FullObsDiscrete	Individual_Q	1.0	0.05	2500000	8	True
IndivQLearningSlugsConsistentOrder/49_4_9	slugs_decentralized	shields/general_shield	True	-10	False	False	GridWorld	Pentagon	FullObsDiscrete	Individual_Q	1.0	0.05	2500000	9	True
IndivQLearningSlugsConsistentOrder/50_5_0	none		True	-10		False	GridWorld	Pentagon	FullObsDiscrete	Individual_Q	1.0	0.05	2500000	0	True
IndivQLearningSlugsConsistentOrder/51_5_1	none		True	-10		False	GridWorld	Pentagon	FullObsDiscrete	Individual_Q	1.0	0.05	2500000	1	True
IndivQLearningSlugsConsistentOrder/52_5_2	none		True	-10		False	GridWorld	Pentagon	FullObsDiscrete	Individual_Q	1.0	0.05	2500000	2	True
IndivQLearningSlugsConsistentOrder/53_5_3	none		True	-10		False	GridWorld	Pentagon	FullObsDiscrete	Individual_Q	1.0	0.05	2500000	3	True
IndivQLearningSlugsConsistentOrder/54_5_4	none		True	-10		False	GridWorld	Pentagon	FullObsDiscrete	Individual_Q	1.0	0.05	2500000	4	True
IndivQLearningSlugsConsistentOrder/55_5_5	none		True	-10		False	GridWorld	Pentagon	FullObsDiscrete	Individual_Q	1.0	0.05	2500000	5	True
IndivQLearningSlugsConsistentOrder/56_5_6	none		True	-10		False	GridWorld	Pentagon	FullObsDiscrete	Individual_Q	1.0	0.05	2500000	6	True
IndivQLearningSlugsConsistentOrder/57_5_7	none		True	-10		False	GridWorld	Pentagon	FullObsDiscrete	Individual_Q	1.0	0.05	2500000	7	True
IndivQLearningSlugsConsistentOrder/58_5_8	none		True	-10		False	GridWorld	Pentagon	FullObsDiscrete	Individual_Q	1.0	0.05	2500000	8	True
IndivQLearningSlugsConsistentOrder/59_5_9	none		True	-10		False	GridWorld	Pentagon	FullObsDiscrete	Individual_Q	1.0	0.05	2500000	9	True
IndivQLearningSlugsConsistentOrder/60_6_0	slugs_centralized	shields/general_shield	True	-10		True	GridWorld	ISR	FullObsDiscrete	Individual_Q	1.0	0.05	2500000	0	True
IndivQLearningSlugsConsistentOrder/61_6_1	slugs_centralized	shields/general_shield	True	-10		True	GridWorld	ISR	FullObsDiscrete	Individual_Q	1.0	0.05	2500000	1	True
IndivQLearningSlugsConsistentOrder/62_6_2	slugs_centralized	shields/general_shield	True	-10		True	GridWorld	ISR	FullObsDiscrete	Individual_Q	1.0	0.05	2500000	2	True
IndivQLearningSlugsConsistentOrder/63_6_3	slugs_centralized	shields/general_shield	True	-10		True	GridWorld	ISR	FullObsDiscrete	Individual_Q	1.0	0.05	2500000	3	True
IndivQLearningSlugsConsistentOrder/64_6_4	slugs_centralized	shields/general_shield	True	-10		True	GridWorld	ISR	FullObsDiscrete	Individual_Q	1.0	0.05	2500000	4	True
IndivQLearningSlugsConsistentOrder/65_6_5	slugs_centralized	shields/general_shield	True	-10		True	GridWorld	ISR	FullObsDiscrete	Individual_Q	1.0	0.05	2500000	5	True
IndivQLearningSlugsConsistentOrder/66_6_6	slugs_centralized	shields/general_shield	True	-10		True	GridWorld	ISR	FullObsDiscrete	Individual_Q	1.0	0.05	2500000	6	True
IndivQLearningSlugsConsistentOrder/67_6_7	slugs_centralized	shields/general_shield	True	-10		True	GridWorld	ISR	FullObsDiscrete	Individual_Q	1.0	0.05	2500000	7	True
IndivQLearningSlugsConsistentOrder/68_6_8	slugs_centralized	shields/general_shield	True	-10		True	GridWorld	ISR	FullObsDiscrete	Individual_Q	1.0	0.05	2500000	8	True
IndivQLearningSlugsConsistentOrder/69_6_9	slugs_centralized	shields/general_shield	True	-10		True	GridWorld	ISR	FullObsDiscrete	Individual_Q	1.0	0.05	2500000	9	True
IndivQLearningSlugsConsistentOrder/70_7_0	slugs_decentralized	shields/general_shield	True	-10	False	True	GridWorld	ISR	FullObsDiscrete	Individual_Q	1.0	0.05	2500000	0	True
IndivQLearningSlugsConsistentOrder/71_7_1	slugs_decentralized	shields/general_shield	True	-10	False	True	GridWorld	ISR	FullObsDiscrete	Individual_Q	1.0	0.05	2500000	1	True
IndivQLearningSlugsConsistentOrder/72_7_2	slugs_decentralized	shields/general_shield	True	-10	False	True	GridWorld	ISR	FullObsDiscrete	Individual_Q	1.0	0.05	2500000	2	True
IndivQLearningSlugsConsistentOrder/73_7_3	slugs_decentralized	shields/general_shield	True	-10	False	True	GridWorld	ISR	FullObsDiscrete	Individual_Q	1.0	0.05	2500000	3	True
IndivQLearningSlugsConsistentOrder/74_7_4	slugs_decentralized	shields/general_shield	True	-10	False	True	GridWorld	ISR	FullObsDiscrete	Individual_Q	1.0	0.05	2500000	4	True
IndivQLearningSlugsConsistentOrder/75_7_5	slugs_decentralized	shields/general_shield	True	-10	False	True	GridWorld	ISR	FullObsDiscrete	Individual_Q	1.0	0.05	2500000	5	True
IndivQLearningSlugsConsistentOrder/76_7_6	slugs_decentralized	shields/general_shield	True	-10	False	True	GridWorld	ISR	FullObsDiscrete	Individual_Q	1.0	0.05	2500000	6	True
IndivQLearningSlugsConsistentOrder/77_7_7	slugs_decentralized	shields/general_shield	True	-10	False	True	GridWorld	ISR	FullObsDiscrete	Individual_Q	1.0	0.05	2500000	7	True
IndivQLearningSlugsConsistentOrder/78_7_8	slugs_decentralized	shields/general_shield	True	-10	False	True	GridWorld	ISR	FullObsDiscrete	Individual_Q	1.0	0.05	2500000	8	True
IndivQLearningSlugsConsistentOrder/79_7_9	slugs_decentralized	shields/general_shield	True	-10	False	True	GridWorld	ISR	FullObsDiscrete	Individual_Q	1.0	0.05	2500000	9	True
IndivQLearningSlugsConsistentOrder/80_8_0	none		True	-10		True	GridWorld	ISR	FullObsDiscrete	Individual_Q	1.0	0.05	2500000	0	True
IndivQLearningSlugsConsistentOrder/81_8_1	none		True	-10		True	GridWorld	ISR	FullObsDiscrete	Individual_Q	1.0	0.05	2500000	1	True
IndivQLearningSlugsConsistentOrder/82_8_2	none		True	-10		True	GridWorld	ISR	FullObsDiscrete	Individual_Q	1.0	0.05	2500000	2	True
IndivQLearningSlugsConsistentOrder/83_8_3	none		True	-10		True	GridWorld	ISR	FullObsDiscrete	Individual_Q	1.0	0.05	2500000	3	True
IndivQLearningSlugsConsistentOrder/84_8_4	none		True	-10		True	GridWorld	ISR	FullObsDiscrete	Individual_Q	1.0	0.05	2500000	4	True
IndivQLearningSlugsConsistentOrder/85_8_5	none		True	-10		True	GridWorld	ISR	FullObsDiscrete	Individual_Q	1.0	0.05	2500000	5	True
IndivQLearningSlugsConsistentOrder/86_8_6	none		True	-10		True	GridWorld	ISR	FullObsDiscrete	Individual_Q	1.0	0.05	2500000	6	True
IndivQLearningSlugsConsistentOrder/87_8_7	none		True	-10		True	GridWorld	ISR	FullObsDiscrete	Individual_Q	1.0	0.05	2500000	7	True
IndivQLearningSlugsConsistentOrder/88_8_8	none		True	-10		True	GridWorld	ISR	FullObsDiscrete	Individual_Q	1.0	0.05	2500000	8	True
IndivQLearningSlugsConsistentOrder/89_8_9	none		True	-10		True	GridWorld	ISR	FullObsDiscrete	Individual_Q	1.0	0.05	2500000	9	True
IndivQLearningSlugsConsistentOrder/90_9_0	slugs_centralized	shields/general_shield	True	-10		False	GridWorld	ISR	FullObsDiscrete	Individual_Q	1.0	0.05	2500000	0	True
IndivQLearningSlugsConsistentOrder/91_9_1	slugs_centralized	shields/general_shield	True	-10		False	GridWorld	ISR	FullObsDiscrete	Individual_Q	1.0	0.05	2500000	1	True
IndivQLearningSlugsConsistentOrder/92_9_2	slugs_centralized	shields/general_shield	True	-10		False	GridWorld	ISR	FullObsDiscrete	Individual_Q	1.0	0.05	2500000	2	True
IndivQLearningSlugsConsistentOrder/93_9_3	slugs_centralized	shields/general_shield	True	-10		False	GridWorld	ISR	FullObsDiscrete	Individual_Q	1.0	0.05	2500000	3	True
IndivQLearningSlugsConsistentOrder/94_9_4	slugs_centralized	shields/general_shield	True	-10		False	GridWorld	ISR	FullObsDiscrete	Individual_Q	1.0	0.05	2500000	4	True
IndivQLearningSlugsConsistentOrder/95_9_5	slugs_centralized	shields/general_shield	True	-10		False	GridWorld	ISR	FullObsDiscrete	Individual_Q	1.0	0.05	2500000	5	True
IndivQLearningSlugsConsistentOrder/96_9_6	slugs_centralized	shields/general_shield	True	-10		False	GridWorld	ISR	FullObsDiscrete	Individual_Q	1.0	0.05	2500000	6	True
IndivQLearningSlugsConsistentOrder/97_9_7	slugs_centralized	shields/general_shield	True	-10		False	GridWorld	ISR	FullObsDiscrete	Individual_Q	1.0	0.05	2500000	7	True
IndivQLearningSlugsConsistentOrder/98_9_8	slugs_centralized	shields/general_shield	True	-10		False	GridWorld	ISR	FullObsDiscrete	Individual_Q	1.0	0.05	2500000	8	True
IndivQLearningSlugsConsistentOrder/99_9_9	slugs_centralized	shields/general_shield	True	-10		False	GridWorld	ISR	FullObsDiscrete	Individual_Q	1.0	0.05	2500000	9	True
IndivQLearningSlugsConsistentOrder/100_10_0	slugs_decentralized	shields/general_shield	True	-10	False	False	GridWorld	ISR	FullObsDiscrete	Individual_Q	1.0	0.05	2500000	0	True
IndivQLearningSlugsConsistentOrder/101_10_1	slugs_decentralized	shields/general_shield	True	-10	False	False	GridWorld	ISR	FullObsDiscrete	Individual_Q	1.0	0.05	2500000	1	True
IndivQLearningSlugsConsistentOrder/102_10_2	slugs_decentralized	shields/general_shield	True	-10	False	False	GridWorld	ISR	FullObsDiscrete	Individual_Q	1.0	0.05	2500000	2	True
IndivQLearningSlugsConsistentOrder/103_10_3	slugs_decentralized	shields/general_shield	True	-10	False	False	GridWorld	ISR	FullObsDiscrete	Individual_Q	1.0	0.05	2500000	3	True
IndivQLearningSlugsConsistentOrder/104_10_4	slugs_decentralized	shields/general_shield	True	-10	False	False	GridWorld	ISR	FullObsDiscrete	Individual_Q	1.0	0.05	2500000	4	True
IndivQLearningSlugsConsistentOrder/105_10_5	slugs_decentralized	shields/general_shield	True	-10	False	False	GridWorld	ISR	FullObsDiscrete	Individual_Q	1.0	0.05	2500000	5	True
IndivQLearningSlugsConsistentOrder/106_10_6	slugs_decentralized	shields/general_shield	True	-10	False	False	GridWorld	ISR	FullObsDiscrete	Individual_Q	1.0	0.05	2500000	6	True
IndivQLearningSlugsConsistentOrder/107_10_7	slugs_decentralized	shields/general_shield	True	-10	False	False	GridWorld	ISR	FullObsDiscrete	Individual_Q	1.0	0.05	2500000	7	True
IndivQLearningSlugsConsistentOrder/108_10_8	slugs_decentralized	shields/general_shield	True	-10	False	False	GridWorld	ISR	FullObsDiscrete	Individual_Q	1.0	0.05	2500000	8	True
IndivQLearningSlugsConsistentOrder/109_10_9	slugs_decentralized	shields/general_shield	True	-10	False	False	GridWorld	ISR	FullObsDiscrete	Individual_Q	1.0	0.05	2500000	9	True
IndivQLearningSlugsConsistentOrder/110_11_0	none		True	-10		False	GridWorld	ISR	FullObsDiscrete	Individual_Q	1.0	0.05	2500000	0	True
IndivQLearningSlugsConsistentOrder/111_11_1	none		True	-10		False	GridWorld	ISR	FullObsDiscrete	Individual_Q	1.0	0.05	2500000	1	True
IndivQLearningSlugsConsistentOrder/112_11_2	none		True	-10		False	GridWorld	ISR	FullObsDiscrete	Individual_Q	1.0	0.05	2500000	2	True
IndivQLearningSlugsConsistentOrder/113_11_3	none		True	-10		False	GridWorld	ISR	FullObsDiscrete	Individual_Q	1.0	0.05	2500000	3	True
IndivQLearningSlugsConsistentOrder/114_11_4	none		True	-10		False	GridWorld	ISR	FullObsDiscrete	Individual_Q	1.0	0.05	2500000	4	True
IndivQLearningSlugsConsistentOrder/115_11_5	none		True	-10		False	GridWorld	ISR	FullObsDiscrete	Individual_Q	1.0	0.05	2500000	5	True
IndivQLearningSlugsConsistentOrder/116_11_6	none		True	-10		False	GridWorld	ISR	FullObsDiscrete	Individual_Q	1.0	0.05	2500000	6	True
IndivQLearningSlugsConsistentOrder/117_11_7	none		True	-10		False	GridWorld	ISR	FullObsDiscrete	Individual_Q	1.0	0.05	2500000	7	True
IndivQLearningSlugsConsistentOrder/118_11_8	none		True	-10		False	GridWorld	ISR	FullObsDiscrete	Individual_Q	1.0	0.05	2500000	8	True
IndivQLearningSlugsConsistentOrder/119_11_9	none		True	-10		False	GridWorld	ISR	FullObsDiscrete	Individual_Q	1.0	0.05	2500000	9	True
IndivQLearningSlugsConsistentOrder/120_12_0	slugs_centralized	shields/general_shield	True	-10		True	GridWorld	MIT	FullObsDiscrete	Individual_Q	1.0	0.05	2500000	0	True
IndivQLearningSlugsConsistentOrder/121_12_1	slugs_centralized	shields/general_shield	True	-10		True	GridWorld	MIT	FullObsDiscrete	Individual_Q	1.0	0.05	2500000	1	True
IndivQLearningSlugsConsistentOrder/122_12_2	slugs_centralized	shields/general_shield	True	-10		True	GridWorld	MIT	FullObsDiscrete	Individual_Q	1.0	0.05	2500000	2	True
IndivQLearningSlugsConsistentOrder/123_12_3	slugs_centralized	shields/general_shield	True	-10		True	GridWorld	MIT	FullObsDiscrete	Individual_Q	1.0	0.05	2500000	3	True
IndivQLearningSlugsConsistentOrder/124_12_4	slugs_centralized	shields/general_shield	True	-10		True	GridWorld	MIT	FullObsDiscrete	Individual_Q	1.0	0.05	2500000	4	True
IndivQLearningSlugsConsistentOrder/125_12_5	slugs_centralized	shields/general_shield	True	-10		True	GridWorld	MIT	FullObsDiscrete	Individual_Q	1.0	0.05	2500000	5	True
IndivQLearningSlugsConsistentOrder/126_12_6	slugs_centralized	shields/general_shield	True	-10		True	GridWorld	MIT	FullObsDiscrete	Individual_Q	1.0	0.05	2500000	6	True
IndivQLearningSlugsConsistentOrder/127_12_7	slugs_centralized	shields/general_shield	True	-10		True	GridWorld	MIT	FullObsDiscrete	Individual_Q	1.0	0.05	2500000	7	True
IndivQLearningSlugsConsistentOrder/128_12_8	slugs_centralized	shields/general_shield	True	-10		True	GridWorld	MIT	FullObsDiscrete	Individual_Q	1.0	0.05	2500000	8	True
IndivQLearningSlugsConsistentOrder/129_12_9	slugs_centralized	shields/general_shield	True	-10		True	GridWorld	MIT	FullObsDiscrete	Individual_Q	1.0	0.05	2500000	9	True
IndivQLearningSlugsConsistentOrder/130_13_0	slugs_decentralized	shields/general_shield	True	-10	False	True	GridWorld	MIT	FullObsDiscrete	Individual_Q	1.0	0.05	2500000	0	True
IndivQLearningSlugsConsistentOrder/131_13_1	slugs_decentralized	shields/general_shield	True	-10	False	True	GridWorld	MIT	FullObsDiscrete	Individual_Q	1.0	0.05	2500000	1	True
IndivQLearningSlugsConsistentOrder/132_13_2	slugs_decentralized	shields/general_shield	True	-10	False	True	GridWorld	MIT	FullObsDiscrete	Individual_Q	1.0	0.05	2500000	2	True
IndivQLearningSlugsConsistentOrder/133_13_3	slugs_decentralized	shields/general_shield	True	-10	False	True	GridWorld	MIT	FullObsDiscrete	Individual_Q	1.0	0.05	2500000	3	True
IndivQLearningSlugsConsistentOrder/134_13_4	slugs_decentralized	shields/general_shield	True	-10	False	True	GridWorld	MIT	FullObsDiscrete	Individual_Q	1.0	0.05	2500000	4	True
IndivQLearningSlugsConsistentOrder/135_13_5	slugs_decentralized	shields/general_shield	True	-10	False	True	GridWorld	MIT	FullObsDiscrete	Individual_Q	1.0	0.05	2500000	5	True
IndivQLearningSlugsConsistentOrder/136_13_6	slugs_decentralized	shields/general_shield	True	-10	False	True	GridWorld	MIT	FullObsDiscrete	Individual_Q	1.0	0.05	2500000	6	True
IndivQLearningSlugsConsistentOrder/137_13_7	slugs_decentralized	shields/general_shield	True	-10	False	True	GridWorld	MIT	FullObsDiscrete	Individual_Q	1.0	0.05	2500000	7	True
IndivQLearningSlugsConsistentOrder/138_13_8	slugs_decentralized	shields/general_shield	True	-10	False	True	GridWorld	MIT	FullObsDiscrete	Individual_Q	1.0	0.05	2500000	8	True
IndivQLearningSlugsConsistentOrder/139_13_9	slugs_decentralized	shields/general_shield	True	-10	False	True	GridWorld	MIT	FullObsDiscrete	Individual_Q	1.0	0.05	2500000	9	True
IndivQLearningSlugsConsistentOrder/140_14_0	none		True	-10		True	GridWorld	MIT	FullObsDiscrete	Individual_Q	1.0	0.05	2500000	0	True
IndivQLearningSlugsConsistentOrder/141_14_1	none		True	-10		True	GridWorld	MIT	FullObsDiscrete	Individual_Q	1.0	0.05	2500000	1	True
IndivQLearningSlugsConsistentOrder/142_14_2	none		True	-10		True	GridWorld	MIT	FullObsDiscrete	Individual_Q	1.0	0.05	2500000	2	True
IndivQLearningSlugsConsistentOrder/143_14_3	none		True	-10		True	GridWorld	MIT	FullObsDiscrete	Individual_Q	1.0	0.05	2500000	3	True
IndivQLearningSlugsConsistentOrder/144_14_4	none		True	-10		True	GridWorld	MIT	FullObsDiscrete	Individual_Q	1.0	0.05	2500000	4	True
IndivQLearningSlugsConsistentOrder/145_14_5	none		True	-10		True	GridWorld	MIT	FullObsDiscrete	Individual_Q	1.0	0.05	2500000	5	True
IndivQLearningSlugsConsistentOrder/146_14_6	none		True	-10		True	GridWorld	MIT	FullObsDiscrete	Individual_Q	1.0	0.05	2500000	6	True
IndivQLearningSlugsConsistentOrder/147_14_7	none		True	-10		True	GridWorld	MIT	FullObsDiscrete	Individual_Q	1.0	0.05	2500000	7	True
IndivQLearningSlugsConsistentOrder/148_14_8	none		True	-10		True	GridWorld	MIT	FullObsDiscrete	Individual_Q	1.0	0.05	2500000	8	True
IndivQLearningSlugsConsistentOrder/149_14_9	none		True	-10		True	GridWorld	MIT	FullObsDiscrete	Individual_Q	1.0	0.05	2500000	9	True
IndivQLearningSlugsConsistentOrder/150_15_0	slugs_centralized	shields/general_shield	True	-10		False	GridWorld	MIT	FullObsDiscrete	Individual_Q	1.0	0.05	2500000	0	True
IndivQLearningSlugsConsistentOrder/151_15_1	slugs_centralized	shields/general_shield	True	-10		False	GridWorld	MIT	FullObsDiscrete	Individual_Q	1.0	0.05	2500000	1	True
IndivQLearningSlugsConsistentOrder/152_15_2	slugs_centralized	shields/general_shield	True	-10		False	GridWorld	MIT	FullObsDiscrete	Individual_Q	1.0	0.05	2500000	2	True
IndivQLearningSlugsConsistentOrder/153_15_3	slugs_centralized	shields/general_shield	True	-10		False	GridWorld	MIT	FullObsDiscrete	Individual_Q	1.0	0.05	2500000	3	True
IndivQLearningSlugsConsistentOrder/154_15_4	slugs_centralized	shields/general_shield	True	-10		False	GridWorld	MIT	FullObsDiscrete	Individual_Q	1.0	0.05	2500000	4	True
IndivQLearningSlugsConsistentOrder/155_15_5	slugs_centralized	shields/general_shield	True	-10		False	GridWorld	MIT	FullObsDiscrete	Individual_Q	1.0	0.05	2500000	5	True
IndivQLearningSlugsConsistentOrder/156_15_6	slugs_centralized	shields/general_shield	True	-10		False	GridWorld	MIT	FullObsDiscrete	Individual_Q	1.0	0.05	2500000	6	True
IndivQLearningSlugsConsistentOrder/157_15_7	slugs_centralized	shields/general_shield	True	-10		False	GridWorld	MIT	FullObsDiscrete	Individual_Q	1.0	0.05	2500000	7	True
IndivQLearningSlugsConsistentOrder/158_15_8	slugs_centralized	shields/general_shield	True	-10		False	GridWorld	MIT	FullObsDiscrete	Individual_Q	1.0	0.05	2500000	8	True
IndivQLearningSlugsConsistentOrder/159_15_9	slugs_centralized	shields/general_shield	True	-10		False	GridWorld	MIT	FullObsDiscrete	Individual_Q	1.0	0.05	2500000	9	True
IndivQLearningSlugsConsistentOrder/160_16_0	slugs_decentralized	shields/general_shield	True	-10	False	False	GridWorld	MIT	FullObsDiscrete	Individual_Q	1.0	0.05	2500000	0	True
IndivQLearningSlugsConsistentOrder/161_16_1	slugs_decentralized	shields/general_shield	True	-10	False	False	GridWorld	MIT	FullObsDiscrete	Individual_Q	1.0	0.05	2500000	1	True
IndivQLearningSlugsConsistentOrder/162_16_2	slugs_decentralized	shields/general_shield	True	-10	False	False	GridWorld	MIT	FullObsDiscrete	Individual_Q	1.0	0.05	2500000	2	True
IndivQLearningSlugsConsistentOrder/163_16_3	slugs_decentralized	shields/general_shield	True	-10	False	False	GridWorld	MIT	FullObsDiscrete	Individual_Q	1.0	0.05	2500000	3	True
IndivQLearningSlugsConsistentOrder/164_16_4	slugs_decentralized	shields/general_shield	True	-10	False	False	GridWorld	MIT	FullObsDiscrete	Individual_Q	1.0	0.05	2500000	4	True
IndivQLearningSlugsConsistentOrder/165_16_5	slugs_decentralized	shields/general_shield	True	-10	False	False	GridWorld	MIT	FullObsDiscrete	Individual_Q	1.0	0.05	2500000	5	True
IndivQLearningSlugsConsistentOrder/166_16_6	slugs_decentralized	shields/general_shield	True	-10	False	False	GridWorld	MIT	FullObsDiscrete	Individual_Q	1.0	0.05	2500000	6	True
IndivQLearningSlugsConsistentOrder/167_16_7	slugs_decentralized	shields/general_shield	True	-10	False	False	GridWorld	MIT	FullObsDiscrete	Individual_Q	1.0	0.05	2500000	7	True
IndivQLearningSlugsConsistentOrder/168_16_8	slugs_decentralized	shields/general_shield	True	-10	False	False	GridWorld	MIT	FullObsDiscrete	Individual_Q	1.0	0.05	2500000	8	True
IndivQLearningSlugsConsistentOrder/169_16_9	slugs_decentralized	shields/general_shield	True	-10	False	False	GridWorld	MIT	FullObsDiscrete	Individual_Q	1.0	0.05	2500000	9	True
IndivQLearningSlugsConsistentOrder/170_17_0	none		True	-10		False	GridWorld	MIT	FullObsDiscrete	Individual_Q	1.0	0.05	2500000	0	True
IndivQLearningSlugsConsistentOrder/171_17_1	none		True	-10		False	GridWorld	MIT	FullObsDiscrete	Individual_Q	1.0	0.05	2500000	1	True
IndivQLearningSlugsConsistentOrder/172_17_2	none		True	-10		False	GridWorld	MIT	FullObsDiscrete	Individual_Q	1.0	0.05	2500000	2	True
IndivQLearningSlugsConsistentOrder/173_17_3	none		True	-10		False	GridWorld	MIT	FullObsDiscrete	Individual_Q	1.0	0.05	2500000	3	True
IndivQLearningSlugsConsistentOrder/174_17_4	none		True	-10		False	GridWorld	MIT	FullObsDiscrete	Individual_Q	1.0	0.05	2500000	4	True
IndivQLearningSlugsConsistentOrder/175_17_5	none		True	-10		False	GridWorld	MIT	FullObsDiscrete	Individual_Q	1.0	0.05	2500000	5	True
IndivQLearningSlugsConsistentOrder/176_17_6	none		True	-10		False	GridWorld	MIT	FullObsDiscrete	Individual_Q	1.0	0.05	2500000	6	True
IndivQLearningSlugsConsistentOrder/177_17_7	none		True	-10		False	GridWorld	MIT	FullObsDiscrete	Individual_Q	1.0	0.05	2500000	7	True
IndivQLearningSlugsConsistentOrder/178_17_8	none		True	-10		False	GridWorld	MIT	FullObsDiscrete	Individual_Q	1.0	0.05	2500000	8	True
IndivQLearningSlugsConsistentOrder/179_17_9	none		True	-10		False	GridWorld	MIT	FullObsDiscrete	Individual_Q	1.0	0.05	2500000	9	True
IndivQLearningSlugsConsistentOrder/180_18_0	slugs_centralized	shields/general_shield	True	-10		True	GridWorld	SUNY	FullObsDiscrete	Individual_Q	1.0	0.05	2500000	0	True
IndivQLearningSlugsConsistentOrder/181_18_1	slugs_centralized	shields/general_shield	True	-10		True	GridWorld	SUNY	FullObsDiscrete	Individual_Q	1.0	0.05	2500000	1	True
IndivQLearningSlugsConsistentOrder/182_18_2	slugs_centralized	shields/general_shield	True	-10		True	GridWorld	SUNY	FullObsDiscrete	Individual_Q	1.0	0.05	2500000	2	True
IndivQLearningSlugsConsistentOrder/183_18_3	slugs_centralized	shields/general_shield	True	-10		True	GridWorld	SUNY	FullObsDiscrete	Individual_Q	1.0	0.05	2500000	3	True
IndivQLearningSlugsConsistentOrder/184_18_4	slugs_centralized	shields/general_shield	True	-10		True	GridWorld	SUNY	FullObsDiscrete	Individual_Q	1.0	0.05	2500000	4	True
IndivQLearningSlugsConsistentOrder/185_18_5	slugs_centralized	shields/general_shield	True	-10		True	GridWorld	SUNY	FullObsDiscrete	Individual_Q	1.0	0.05	2500000	5	True
IndivQLearningSlugsConsistentOrder/186_18_6	slugs_centralized	shields/general_shield	True	-10		True	GridWorld	SUNY	FullObsDiscrete	Individual_Q	1.0	0.05	2500000	6	True
IndivQLearningSlugsConsistentOrder/187_18_7	slugs_centralized	shields/general_shield	True	-10		True	GridWorld	SUNY	FullObsDiscrete	Individual_Q	1.0	0.05	2500000	7	True
IndivQLearningSlugsConsistentOrder/188_18_8	slugs_centralized	shields/general_shield	True	-10		True	GridWorld	SUNY	FullObsDiscrete	Individual_Q	1.0	0.05	2500000	8	True
IndivQLearningSlugsConsistentOrder/189_18_9	slugs_centralized	shields/general_shield	True	-10		True	GridWorld	SUNY	FullObsDiscrete	Individual_Q	1.0	0.05	2500000	9	True
IndivQLearningSlugsConsistentOrder/190_19_0	slugs_decentralized	shields/general_shield	True	-10	False	True	GridWorld	SUNY	FullObsDiscrete	Individual_Q	1.0	0.05	2500000	0	True
IndivQLearningSlugsConsistentOrder/191_19_1	slugs_decentralized	shields/general_shield	True	-10	False	True	GridWorld	SUNY	FullObsDiscrete	Individual_Q	1.0	0.05	2500000	1	True
IndivQLearningSlugsConsistentOrder/192_19_2	slugs_decentralized	shields/general_shield	True	-10	False	True	GridWorld	SUNY	FullObsDiscrete	Individual_Q	1.0	0.05	2500000	2	True
IndivQLearningSlugsConsistentOrder/193_19_3	slugs_decentralized	shields/general_shield	True	-10	False	True	GridWorld	SUNY	FullObsDiscrete	Individual_Q	1.0	0.05	2500000	3	True
IndivQLearningSlugsConsistentOrder/194_19_4	slugs_decentralized	shields/general_shield	True	-10	False	True	GridWorld	SUNY	FullObsDiscrete	Individual_Q	1.0	0.05	2500000	4	True
IndivQLearningSlugsConsistentOrder/195_19_5	slugs_decentralized	shields/general_shield	True	-10	False	True	GridWorld	SUNY	FullObsDiscrete	Individual_Q	1.0	0.05	2500000	5	True
IndivQLearningSlugsConsistentOrder/196_19_6	slugs_decentralized	shields/general_shield	True	-10	False	True	GridWorld	SUNY	FullObsDiscrete	Individual_Q	1.0	0.05	2500000	6	True
IndivQLearningSlugsConsistentOrder/197_19_7	slugs_decentralized	shields/general_shield	True	-10	False	True	GridWorld	SUNY	FullObsDiscrete	Individual_Q	1.0	0.05	2500000	7	True
IndivQLearningSlugsConsistentOrder/198_19_8	slugs_decentralized	shields/general_shield	True	-10	False	True	GridWorld	SUNY	FullObsDiscrete	Individual_Q	1.0	0.05	2500000	8	True
IndivQLearningSlugsConsistentOrder/199_19_9	slugs_decentralized	shields/general_shield	True	-10	False	True	GridWorld	SUNY	FullObsDiscrete	Individual_Q	1.0	0.05	2500000	9	True
IndivQLearningSlugsConsistentOrder/200_20_0	none		True	-10		True	GridWorld	SUNY	FullObsDiscrete	Individual_Q	1.0	0.05	2500000	0	True
IndivQLearningSlugsConsistentOrder/201_20_1	none		True	-10		True	GridWorld	SUNY	FullObsDiscrete	Individual_Q	1.0	0.05	2500000	1	True
IndivQLearningSlugsConsistentOrder/202_20_2	none		True	-10		True	GridWorld	SUNY	FullObsDiscrete	Individual_Q	1.0	0.05	2500000	2	True
IndivQLearningSlugsConsistentOrder/203_20_3	none		True	-10		True	GridWorld	SUNY	FullObsDiscrete	Individual_Q	1.0	0.05	2500000	3	True
IndivQLearningSlugsConsistentOrder/204_20_4	none		True	-10		True	GridWorld	SUNY	FullObsDiscrete	Individual_Q	1.0	0.05	2500000	4	True
IndivQLearningSlugsConsistentOrder/205_20_5	none		True	-10		True	GridWorld	SUNY	FullObsDiscrete	Individual_Q	1.0	0.05	2500000	5	True
IndivQLearningSlugsConsistentOrder/206_20_6	none		True	-10		True	GridWorld	SUNY	FullObsDiscrete	Individual_Q	1.0	0.05	2500000	6	True
IndivQLearningSlugsConsistentOrder/207_20_7	none		True	-10		True	GridWorld	SUNY	FullObsDiscrete	Individual_Q	1.0	0.05	2500000	7	True
IndivQLearningSlugsConsistentOrder/208_20_8	none		True	-10		True	GridWorld	SUNY	FullObsDiscrete	Individual_Q	1.0	0.05	2500000	8	True
IndivQLearningSlugsConsistentOrder/209_20_9	none		True	-10		True	GridWorld	SUNY	FullObsDiscrete	Individual_Q	1.0	0.05	2500000	9	True
IndivQLearningSlugsConsistentOrder/210_21_0	slugs_centralized	shields/general_shield	True	-10		False	GridWorld	SUNY	FullObsDiscrete	Individual_Q	1.0	0.05	2500000	0	True
IndivQLearningSlugsConsistentOrder/211_21_1	slugs_centralized	shields/general_shield	True	-10		False	GridWorld	SUNY	FullObsDiscrete	Individual_Q	1.0	0.05	2500000	1	True
IndivQLearningSlugsConsistentOrder/212_21_2	slugs_centralized	shields/general_shield	True	-10		False	GridWorld	SUNY	FullObsDiscrete	Individual_Q	1.0	0.05	2500000	2	True
IndivQLearningSlugsConsistentOrder/213_21_3	slugs_centralized	shields/general_shield	True	-10		False	GridWorld	SUNY	FullObsDiscrete	Individual_Q	1.0	0.05	2500000	3	True
IndivQLearningSlugsConsistentOrder/214_21_4	slugs_centralized	shields/general_shield	True	-10		False	GridWorld	SUNY	FullObsDiscrete	Individual_Q	1.0	0.05	2500000	4	True
IndivQLearningSlugsConsistentOrder/215_21_5	slugs_centralized	shields/general_shield	True	-10		False	GridWorld	SUNY	FullObsDiscrete	Individual_Q	1.0	0.05	2500000	5	True
IndivQLearningSlugsConsistentOrder/216_21_6	slugs_centralized	shields/general_shield	True	-10		False	GridWorld	SUNY	FullObsDiscrete	Individual_Q	1.0	0.05	2500000	6	True
IndivQLearningSlugsConsistentOrder/217_21_7	slugs_centralized	shields/general_shield	True	-10		False	GridWorld	SUNY	FullObsDiscrete	Individual_Q	1.0	0.05	2500000	7	True
IndivQLearningSlugsConsistentOrder/218_21_8	slugs_centralized	shields/general_shield	True	-10		False	GridWorld	SUNY	FullObsDiscrete	Individual_Q	1.0	0.05	2500000	8	True
IndivQLearningSlugsConsistentOrder/219_21_9	slugs_centralized	shields/general_shield	True	-10		False	GridWorld	SUNY	FullObsDiscrete	Individual_Q	1.0	0.05	2500000	9	True
IndivQLearningSlugsConsistentOrder/220_22_0	slugs_decentralized	shields/general_shield	True	-10	False	False	GridWorld	SUNY	FullObsDiscrete	Individual_Q	1.0	0.05	2500000	0	True
IndivQLearningSlugsConsistentOrder/221_22_1	slugs_decentralized	shields/general_shield	True	-10	False	False	GridWorld	SUNY	FullObsDiscrete	Individual_Q	1.0	0.05	2500000	1	True
IndivQLearningSlugsConsistentOrder/222_22_2	slugs_decentralized	shields/general_shield	True	-10	False	False	GridWorld	SUNY	FullObsDiscrete	Individual_Q	1.0	0.05	2500000	2	True
IndivQLearningSlugsConsistentOrder/223_22_3	slugs_decentralized	shields/general_shield	True	-10	False	False	GridWorld	SUNY	FullObsDiscrete	Individual_Q	1.0	0.05	2500000	3	True
IndivQLearningSlugsConsistentOrder/224_22_4	slugs_decentralized	shields/general_shield	True	-10	False	False	GridWorld	SUNY	FullObsDiscrete	Individual_Q	1.0	0.05	2500000	4	True
IndivQLearningSlugsConsistentOrder/225_22_5	slugs_decentralized	shields/general_shield	True	-10	False	False	GridWorld	SUNY	FullObsDiscrete	Individual_Q	1.0	0.05	2500000	5	True
IndivQLearningSlugsConsistentOrder/226_22_6	slugs_decentralized	shields/general_shield	True	-10	False	False	GridWorld	SUNY	FullObsDiscrete	Individual_Q	1.0	0.05	2500000	6	True
IndivQLearningSlugsConsistentOrder/227_22_7	slugs_decentralized	shields/general_shield	True	-10	False	False	GridWorld	SUNY	FullObsDiscrete	Individual_Q	1.0	0.05	2500000	7	True
IndivQLearningSlugsConsistentOrder/228_22_8	slugs_decentralized	shields/general_shield	True	-10	False	False	GridWorld	SUNY	FullObsDiscrete	Individual_Q	1.0	0.05	2500000	8	True
IndivQLearningSlugsConsistentOrder/229_22_9	slugs_decentralized	shields/general_shield	True	-10	False	False	GridWorld	SUNY	FullObsDiscrete	Individual_Q	1.0	0.05	2500000	9	True
IndivQLearningSlugsConsistentOrder/230_23_0	none		True	-10		False	GridWorld	SUNY	FullObsDiscrete	Individual_Q	1.0	0.05	2500000	0	True
IndivQLearningSlugsConsistentOrder/231_23_1	none		True	-10		False	GridWorld	SUNY	FullObsDiscrete	Individual_Q	1.0	0.05	2500000	1	True
IndivQLearningSlugsConsistentOrder/232_23_2	none		True	-10		False	GridWorld	SUNY	FullObsDiscrete	Individual_Q	1.0	0.05	2500000	2	True
IndivQLearningSlugsConsistentOrder/233_23_3	none		True	-10		False	GridWorld	SUNY	FullObsDiscrete	Individual_Q	1.0	0.05	2500000	3	True
IndivQLearningSlugsConsistentOrder/234_23_4	none		True	-10		False	GridWorld	SUNY	FullObsDiscrete	Individual_Q	1.0	0.05	2500000	4	True
IndivQLearningSlugsConsistentOrder/235_23_5	none		True	-10		False	GridWorld	SUNY	FullObsDiscrete	Individual_Q	1.0	0.05	2500000	5	True
IndivQLearningSlugsConsistentOrder/236_23_6	none		True	-10		False	GridWorld	SUNY	FullObsDiscrete	Individual_Q	1.0	0.05	2500000	6	True
IndivQLearningSlugsConsistentOrder/237_23_7	none		True	-10		False	GridWorld	SUNY	FullObsDiscrete	Individual_Q	1.0	0.05	2500000	7	True
IndivQLearningSlugsConsistentOrder/238_23_8	none		True	-10		False	GridWorld	SUNY	FullObsDiscrete	Individual_Q	1.0	0.05	2500000	8	True
IndivQLearningSlugsConsistentOrder/239_23_9	none		True	-10		False	GridWorld	SUNY	FullObsDiscrete	Individual_Q	1.0	0.05	2500000	9	True
