# Supplementary material
Source: ML conference proceedings conference paper supplement (https://proceedings.neurips.cc/paper_files/paper/2022/hash/57444e14ecd9e2c8f603b4f012ce3811-Abstract.html)
Supplement: Supplementary file 1 [file 57444e14ecd9e2c8f603b4f012ce3811-Supplemental-Conference.zip › 3410_shield_decentralization_for_sa-Supplementary Material/parallel_configs/IndivQLearningSlugsEval.csv]

run_name	shield	shield_specification	punish_unsafe_orig_action	punish_unsafe_orig_action_modifier	randomize_starts	map_type	grid_world_map_name	grid_world_obs_type	learner_type	learner_anneal_eps_start	learner_anneal_eps_finish	max_total_steps	seed	skip_training	evaluation_run_name	evaluation_shield	evaluation_shield_specification	learner_evaluation_epsilon
IndivQLearningSlugs/0_0_0	slugs_centralized	shields/general_shield	True	-10	True	GridWorld	Pentagon	FullObsDiscrete	Individual_Q	1.0	0.05	2500000	0	True	IndivQLearningSlugs/0_0_0_slugs_centralized	slugs_centralized	shields/general_shield	0.05
IndivQLearningSlugs/0_0_0	slugs_centralized	shields/general_shield	True	-10	True	GridWorld	Pentagon	FullObsDiscrete	Individual_Q	1.0	0.05	2500000	0	True	IndivQLearningSlugs/0_0_0_slugs_decentralized	slugs_decentralized	shields/general_shield	0.05
IndivQLearningSlugs/0_0_0	slugs_centralized	shields/general_shield	True	-10	True	GridWorld	Pentagon	FullObsDiscrete	Individual_Q	1.0	0.05	2500000	0	True	IndivQLearningSlugs/0_0_0_none	none		0.05
IndivQLearningSlugs/1_0_1	slugs_centralized	shields/general_shield	True	-10	True	GridWorld	Pentagon	FullObsDiscrete	Individual_Q	1.0	0.05	2500000	1	True	IndivQLearningSlugs/1_0_1_slugs_centralized	slugs_centralized	shields/general_shield	0.05
IndivQLearningSlugs/1_0_1	slugs_centralized	shields/general_shield	True	-10	True	GridWorld	Pentagon	FullObsDiscrete	Individual_Q	1.0	0.05	2500000	1	True	IndivQLearningSlugs/1_0_1_slugs_decentralized	slugs_decentralized	shields/general_shield	0.05
IndivQLearningSlugs/1_0_1	slugs_centralized	shields/general_shield	True	-10	True	GridWorld	Pentagon	FullObsDiscrete	Individual_Q	1.0	0.05	2500000	1	True	IndivQLearningSlugs/1_0_1_none	none		0.05
IndivQLearningSlugs/2_0_2	slugs_centralized	shields/general_shield	True	-10	True	GridWorld	Pentagon	FullObsDiscrete	Individual_Q	1.0	0.05	2500000	2	True	IndivQLearningSlugs/2_0_2_slugs_centralized	slugs_centralized	shields/general_shield	0.05
IndivQLearningSlugs/2_0_2	slugs_centralized	shields/general_shield	True	-10	True	GridWorld	Pentagon	FullObsDiscrete	Individual_Q	1.0	0.05	2500000	2	True	IndivQLearningSlugs/2_0_2_slugs_decentralized	slugs_decentralized	shields/general_shield	0.05
IndivQLearningSlugs/2_0_2	slugs_centralized	shields/general_shield	True	-10	True	GridWorld	Pentagon	FullObsDiscrete	Individual_Q	1.0	0.05	2500000	2	True	IndivQLearningSlugs/2_0_2_none	none		0.05
IndivQLearningSlugs/3_0_3	slugs_centralized	shields/general_shield	True	-10	True	GridWorld	Pentagon	FullObsDiscrete	Individual_Q	1.0	0.05	2500000	3	True	IndivQLearningSlugs/3_0_3_slugs_centralized	slugs_centralized	shields/general_shield	0.05
IndivQLearningSlugs/3_0_3	slugs_centralized	shields/general_shield	True	-10	True	GridWorld	Pentagon	FullObsDiscrete	Individual_Q	1.0	0.05	2500000	3	True	IndivQLearningSlugs/3_0_3_slugs_decentralized	slugs_decentralized	shields/general_shield	0.05
IndivQLearningSlugs/3_0_3	slugs_centralized	shields/general_shield	True	-10	True	GridWorld	Pentagon	FullObsDiscrete	Individual_Q	1.0	0.05	2500000	3	True	IndivQLearningSlugs/3_0_3_none	none		0.05
IndivQLearningSlugs/4_0_4	slugs_centralized	shields/general_shield	True	-10	True	GridWorld	Pentagon	FullObsDiscrete	Individual_Q	1.0	0.05	2500000	4	True	IndivQLearningSlugs/4_0_4_slugs_centralized	slugs_centralized	shields/general_shield	0.05
IndivQLearningSlugs/4_0_4	slugs_centralized	shields/general_shield	True	-10	True	GridWorld	Pentagon	FullObsDiscrete	Individual_Q	1.0	0.05	2500000	4	True	IndivQLearningSlugs/4_0_4_slugs_decentralized	slugs_decentralized	shields/general_shield	0.05
IndivQLearningSlugs/4_0_4	slugs_centralized	shields/general_shield	True	-10	True	GridWorld	Pentagon	FullObsDiscrete	Individual_Q	1.0	0.05	2500000	4	True	IndivQLearningSlugs/4_0_4_none	none		0.05
IndivQLearningSlugs/5_0_5	slugs_centralized	shields/general_shield	True	-10	True	GridWorld	Pentagon	FullObsDiscrete	Individual_Q	1.0	0.05	2500000	5	True	IndivQLearningSlugs/5_0_5_slugs_centralized	slugs_centralized	shields/general_shield	0.05
IndivQLearningSlugs/5_0_5	slugs_centralized	shields/general_shield	True	-10	True	GridWorld	Pentagon	FullObsDiscrete	Individual_Q	1.0	0.05	2500000	5	True	IndivQLearningSlugs/5_0_5_slugs_decentralized	slugs_decentralized	shields/general_shield	0.05
IndivQLearningSlugs/5_0_5	slugs_centralized	shields/general_shield	True	-10	True	GridWorld	Pentagon	FullObsDiscrete	Individual_Q	1.0	0.05	2500000	5	True	IndivQLearningSlugs/5_0_5_none	none		0.05
IndivQLearningSlugs/6_0_6	slugs_centralized	shields/general_shield	True	-10	True	GridWorld	Pentagon	FullObsDiscrete	Individual_Q	1.0	0.05	2500000	6	True	IndivQLearningSlugs/6_0_6_slugs_centralized	slugs_centralized	shields/general_shield	0.05
IndivQLearningSlugs/6_0_6	slugs_centralized	shields/general_shield	True	-10	True	GridWorld	Pentagon	FullObsDiscrete	Individual_Q	1.0	0.05	2500000	6	True	IndivQLearningSlugs/6_0_6_slugs_decentralized	slugs_decentralized	shields/general_shield	0.05
IndivQLearningSlugs/6_0_6	slugs_centralized	shields/general_shield	True	-10	True	GridWorld	Pentagon	FullObsDiscrete	Individual_Q	1.0	0.05	2500000	6	True	IndivQLearningSlugs/6_0_6_none	none		0.05
IndivQLearningSlugs/7_0_7	slugs_centralized	shields/general_shield	True	-10	True	GridWorld	Pentagon	FullObsDiscrete	Individual_Q	1.0	0.05	2500000	7	True	IndivQLearningSlugs/7_0_7_slugs_centralized	slugs_centralized	shields/general_shield	0.05
IndivQLearningSlugs/7_0_7	slugs_centralized	shields/general_shield	True	-10	True	GridWorld	Pentagon	FullObsDiscrete	Individual_Q	1.0	0.05	2500000	7	True	IndivQLearningSlugs/7_0_7_slugs_decentralized	slugs_decentralized	shields/general_shield	0.05
IndivQLearningSlugs/7_0_7	slugs_centralized	shields/general_shield	True	-10	True	GridWorld	Pentagon	FullObsDiscrete	Individual_Q	1.0	0.05	2500000	7	True	IndivQLearningSlugs/7_0_7_none	none		0.05
IndivQLearningSlugs/8_0_8	slugs_centralized	shields/general_shield	True	-10	True	GridWorld	Pentagon	FullObsDiscrete	Individual_Q	1.0	0.05	2500000	8	True	IndivQLearningSlugs/8_0_8_slugs_centralized	slugs_centralized	shields/general_shield	0.05
IndivQLearningSlugs/8_0_8	slugs_centralized	shields/general_shield	True	-10	True	GridWorld	Pentagon	FullObsDiscrete	Individual_Q	1.0	0.05	2500000	8	True	IndivQLearningSlugs/8_0_8_slugs_decentralized	slugs_decentralized	shields/general_shield	0.05
IndivQLearningSlugs/8_0_8	slugs_centralized	shields/general_shield	True	-10	True	GridWorld	Pentagon	FullObsDiscrete	Individual_Q	1.0	0.05	2500000	8	True	IndivQLearningSlugs/8_0_8_none	none		0.05
IndivQLearningSlugs/9_0_9	slugs_centralized	shields/general_shield	True	-10	True	GridWorld	Pentagon	FullObsDiscrete	Individual_Q	1.0	0.05	2500000	9	True	IndivQLearningSlugs/9_0_9_slugs_centralized	slugs_centralized	shields/general_shield	0.05
IndivQLearningSlugs/9_0_9	slugs_centralized	shields/general_shield	True	-10	True	GridWorld	Pentagon	FullObsDiscrete	Individual_Q	1.0	0.05	2500000	9	True	IndivQLearningSlugs/9_0_9_slugs_decentralized	slugs_decentralized	shields/general_shield	0.05
IndivQLearningSlugs/9_0_9	slugs_centralized	shields/general_shield	True	-10	True	GridWorld	Pentagon	FullObsDiscrete	Individual_Q	1.0	0.05	2500000	9	True	IndivQLearningSlugs/9_0_9_none	none		0.05
IndivQLearningSlugs/10_1_0	slugs_decentralized	shields/general_shield	True	-10	True	GridWorld	Pentagon	FullObsDiscrete	Individual_Q	1.0	0.05	2500000	0	True	IndivQLearningSlugs/10_1_0_slugs_centralized	slugs_centralized	shields/general_shield	0.05
IndivQLearningSlugs/10_1_0	slugs_decentralized	shields/general_shield	True	-10	True	GridWorld	Pentagon	FullObsDiscrete	Individual_Q	1.0	0.05	2500000	0	True	IndivQLearningSlugs/10_1_0_slugs_decentralized	slugs_decentralized	shields/general_shield	0.05
IndivQLearningSlugs/10_1_0	slugs_decentralized	shields/general_shield	True	-10	True	GridWorld	Pentagon	FullObsDiscrete	Individual_Q	1.0	0.05	2500000	0	True	IndivQLearningSlugs/10_1_0_none	none		0.05
IndivQLearningSlugs/11_1_1	slugs_decentralized	shields/general_shield	True	-10	True	GridWorld	Pentagon	FullObsDiscrete	Individual_Q	1.0	0.05	2500000	1	True	IndivQLearningSlugs/11_1_1_slugs_centralized	slugs_centralized	shields/general_shield	0.05
IndivQLearningSlugs/11_1_1	slugs_decentralized	shields/general_shield	True	-10	True	GridWorld	Pentagon	FullObsDiscrete	Individual_Q	1.0	0.05	2500000	1	True	IndivQLearningSlugs/11_1_1_slugs_decentralized	slugs_decentralized	shields/general_shield	0.05
IndivQLearningSlugs/11_1_1	slugs_decentralized	shields/general_shield	True	-10	True	GridWorld	Pentagon	FullObsDiscrete	Individual_Q	1.0	0.05	2500000	1	True	IndivQLearningSlugs/11_1_1_none	none		0.05
IndivQLearningSlugs/12_1_2	slugs_decentralized	shields/general_shield	True	-10	True	GridWorld	Pentagon	FullObsDiscrete	Individual_Q	1.0	0.05	2500000	2	True	IndivQLearningSlugs/12_1_2_slugs_centralized	slugs_centralized	shields/general_shield	0.05
IndivQLearningSlugs/12_1_2	slugs_decentralized	shields/general_shield	True	-10	True	GridWorld	Pentagon	FullObsDiscrete	Individual_Q	1.0	0.05	2500000	2	True	IndivQLearningSlugs/12_1_2_slugs_decentralized	slugs_decentralized	shields/general_shield	0.05
IndivQLearningSlugs/12_1_2	slugs_decentralized	shields/general_shield	True	-10	True	GridWorld	Pentagon	FullObsDiscrete	Individual_Q	1.0	0.05	2500000	2	True	IndivQLearningSlugs/12_1_2_none	none		0.05
IndivQLearningSlugs/13_1_3	slugs_decentralized	shields/general_shield	True	-10	True	GridWorld	Pentagon	FullObsDiscrete	Individual_Q	1.0	0.05	2500000	3	True	IndivQLearningSlugs/13_1_3_slugs_centralized	slugs_centralized	shields/general_shield	0.05
IndivQLearningSlugs/13_1_3	slugs_decentralized	shields/general_shield	True	-10	True	GridWorld	Pentagon	FullObsDiscrete	Individual_Q	1.0	0.05	2500000	3	True	IndivQLearningSlugs/13_1_3_slugs_decentralized	slugs_decentralized	shields/general_shield	0.05
IndivQLearningSlugs/13_1_3	slugs_decentralized	shields/general_shield	True	-10	True	GridWorld	Pentagon	FullObsDiscrete	Individual_Q	1.0	0.05	2500000	3	True	IndivQLearningSlugs/13_1_3_none	none		0.05
IndivQLearningSlugs/14_1_4	slugs_decentralized	shields/general_shield	True	-10	True	GridWorld	Pentagon	FullObsDiscrete	Individual_Q	1.0	0.05	2500000	4	True	IndivQLearningSlugs/14_1_4_slugs_centralized	slugs_centralized	shields/general_shield	0.05
IndivQLearningSlugs/14_1_4	slugs_decentralized	shields/general_shield	True	-10	True	GridWorld	Pentagon	FullObsDiscrete	Individual_Q	1.0	0.05	2500000	4	True	IndivQLearningSlugs/14_1_4_slugs_decentralized	slugs_decentralized	shields/general_shield	0.05
IndivQLearningSlugs/14_1_4	slugs_decentralized	shields/general_shield	True	-10	True	GridWorld	Pentagon	FullObsDiscrete	Individual_Q	1.0	0.05	2500000	4	True	IndivQLearningSlugs/14_1_4_none	none		0.05
IndivQLearningSlugs/15_1_5	slugs_decentralized	shields/general_shield	True	-10	True	GridWorld	Pentagon	FullObsDiscrete	Individual_Q	1.0	0.05	2500000	5	True	IndivQLearningSlugs/15_1_5_slugs_centralized	slugs_centralized	shields/general_shield	0.05
IndivQLearningSlugs/15_1_5	slugs_decentralized	shields/general_shield	True	-10	True	GridWorld	Pentagon	FullObsDiscrete	Individual_Q	1.0	0.05	2500000	5	True	IndivQLearningSlugs/15_1_5_slugs_decentralized	slugs_decentralized	shields/general_shield	0.05
IndivQLearningSlugs/15_1_5	slugs_decentralized	shields/general_shield	True	-10	True	GridWorld	Pentagon	FullObsDiscrete	Individual_Q	1.0	0.05	2500000	5	True	IndivQLearningSlugs/15_1_5_none	none		0.05
IndivQLearningSlugs/16_1_6	slugs_decentralized	shields/general_shield	True	-10	True	GridWorld	Pentagon	FullObsDiscrete	Individual_Q	1.0	0.05	2500000	6	True	IndivQLearningSlugs/16_1_6_slugs_centralized	slugs_centralized	shields/general_shield	0.05
IndivQLearningSlugs/16_1_6	slugs_decentralized	shields/general_shield	True	-10	True	GridWorld	Pentagon	FullObsDiscrete	Individual_Q	1.0	0.05	2500000	6	True	IndivQLearningSlugs/16_1_6_slugs_decentralized	slugs_decentralized	shields/general_shield	0.05
IndivQLearningSlugs/16_1_6	slugs_decentralized	shields/general_shield	True	-10	True	GridWorld	Pentagon	FullObsDiscrete	Individual_Q	1.0	0.05	2500000	6	True	IndivQLearningSlugs/16_1_6_none	none		0.05
IndivQLearningSlugs/17_1_7	slugs_decentralized	shields/general_shield	True	-10	True	GridWorld	Pentagon	FullObsDiscrete	Individual_Q	1.0	0.05	2500000	7	True	IndivQLearningSlugs/17_1_7_slugs_centralized	slugs_centralized	shields/general_shield	0.05
IndivQLearningSlugs/17_1_7	slugs_decentralized	shields/general_shield	True	-10	True	GridWorld	Pentagon	FullObsDiscrete	Individual_Q	1.0	0.05	2500000	7	True	IndivQLearningSlugs/17_1_7_slugs_decentralized	slugs_decentralized	shields/general_shield	0.05
IndivQLearningSlugs/17_1_7	slugs_decentralized	shields/general_shield	True	-10	True	GridWorld	Pentagon	FullObsDiscrete	Individual_Q	1.0	0.05	2500000	7	True	IndivQLearningSlugs/17_1_7_none	none		0.05
IndivQLearningSlugs/18_1_8	slugs_decentralized	shields/general_shield	True	-10	True	GridWorld	Pentagon	FullObsDiscrete	Individual_Q	1.0	0.05	2500000	8	True	IndivQLearningSlugs/18_1_8_slugs_centralized	slugs_centralized	shields/general_shield	0.05
IndivQLearningSlugs/18_1_8	slugs_decentralized	shields/general_shield	True	-10	True	GridWorld	Pentagon	FullObsDiscrete	Individual_Q	1.0	0.05	2500000	8	True	IndivQLearningSlugs/18_1_8_slugs_decentralized	slugs_decentralized	shields/general_shield	0.05
IndivQLearningSlugs/18_1_8	slugs_decentralized	shields/general_shield	True	-10	True	GridWorld	Pentagon	FullObsDiscrete	Individual_Q	1.0	0.05	2500000	8	True	IndivQLearningSlugs/18_1_8_none	none		0.05
IndivQLearningSlugs/19_1_9	slugs_decentralized	shields/general_shield	True	-10	True	GridWorld	Pentagon	FullObsDiscrete	Individual_Q	1.0	0.05	2500000	9	True	IndivQLearningSlugs/19_1_9_slugs_centralized	slugs_centralized	shields/general_shield	0.05
IndivQLearningSlugs/19_1_9	slugs_decentralized	shields/general_shield	True	-10	True	GridWorld	Pentagon	FullObsDiscrete	Individual_Q	1.0	0.05	2500000	9	True	IndivQLearningSlugs/19_1_9_slugs_decentralized	slugs_decentralized	shields/general_shield	0.05
IndivQLearningSlugs/19_1_9	slugs_decentralized	shields/general_shield	True	-10	True	GridWorld	Pentagon	FullObsDiscrete	Individual_Q	1.0	0.05	2500000	9	True	IndivQLearningSlugs/19_1_9_none	none		0.05
IndivQLearningSlugs/20_2_0	none		True	-10	True	GridWorld	Pentagon	FullObsDiscrete	Individual_Q	1.0	0.05	2500000	0	True	IndivQLearningSlugs/20_2_0_slugs_centralized	slugs_centralized	shields/general_shield	0.05
IndivQLearningSlugs/20_2_0	none		True	-10	True	GridWorld	Pentagon	FullObsDiscrete	Individual_Q	1.0	0.05	2500000	0	True	IndivQLearningSlugs/20_2_0_slugs_decentralized	slugs_decentralized	shields/general_shield	0.05
IndivQLearningSlugs/20_2_0	none		True	-10	True	GridWorld	Pentagon	FullObsDiscrete	Individual_Q	1.0	0.05	2500000	0	True	IndivQLearningSlugs/20_2_0_none	none		0.05
IndivQLearningSlugs/21_2_1	none		True	-10	True	GridWorld	Pentagon	FullObsDiscrete	Individual_Q	1.0	0.05	2500000	1	True	IndivQLearningSlugs/21_2_1_slugs_centralized	slugs_centralized	shields/general_shield	0.05
IndivQLearningSlugs/21_2_1	none		True	-10	True	GridWorld	Pentagon	FullObsDiscrete	Individual_Q	1.0	0.05	2500000	1	True	IndivQLearningSlugs/21_2_1_slugs_decentralized	slugs_decentralized	shields/general_shield	0.05
IndivQLearningSlugs/21_2_1	none		True	-10	True	GridWorld	Pentagon	FullObsDiscrete	Individual_Q	1.0	0.05	2500000	1	True	IndivQLearningSlugs/21_2_1_none	none		0.05
IndivQLearningSlugs/22_2_2	none		True	-10	True	GridWorld	Pentagon	FullObsDiscrete	Individual_Q	1.0	0.05	2500000	2	True	IndivQLearningSlugs/22_2_2_slugs_centralized	slugs_centralized	shields/general_shield	0.05
IndivQLearningSlugs/22_2_2	none		True	-10	True	GridWorld	Pentagon	FullObsDiscrete	Individual_Q	1.0	0.05	2500000	2	True	IndivQLearningSlugs/22_2_2_slugs_decentralized	slugs_decentralized	shields/general_shield	0.05
IndivQLearningSlugs/22_2_2	none		True	-10	True	GridWorld	Pentagon	FullObsDiscrete	Individual_Q	1.0	0.05	2500000	2	True	IndivQLearningSlugs/22_2_2_none	none		0.05
IndivQLearningSlugs/23_2_3	none		True	-10	True	GridWorld	Pentagon	FullObsDiscrete	Individual_Q	1.0	0.05	2500000	3	True	IndivQLearningSlugs/23_2_3_slugs_centralized	slugs_centralized	shields/general_shield	0.05
IndivQLearningSlugs/23_2_3	none		True	-10	True	GridWorld	Pentagon	FullObsDiscrete	Individual_Q	1.0	0.05	2500000	3	True	IndivQLearningSlugs/23_2_3_slugs_decentralized	slugs_decentralized	shields/general_shield	0.05
IndivQLearningSlugs/23_2_3	none		True	-10	True	GridWorld	Pentagon	FullObsDiscrete	Individual_Q	1.0	0.05	2500000	3	True	IndivQLearningSlugs/23_2_3_none	none		0.05
IndivQLearningSlugs/24_2_4	none		True	-10	True	GridWorld	Pentagon	FullObsDiscrete	Individual_Q	1.0	0.05	2500000	4	True	IndivQLearningSlugs/24_2_4_slugs_centralized	slugs_centralized	shields/general_shield	0.05
IndivQLearningSlugs/24_2_4	none		True	-10	True	GridWorld	Pentagon	FullObsDiscrete	Individual_Q	1.0	0.05	2500000	4	True	IndivQLearningSlugs/24_2_4_slugs_decentralized	slugs_decentralized	shields/general_shield	0.05
IndivQLearningSlugs/24_2_4	none		True	-10	True	GridWorld	Pentagon	FullObsDiscrete	Individual_Q	1.0	0.05	2500000	4	True	IndivQLearningSlugs/24_2_4_none	none		0.05
IndivQLearningSlugs/25_2_5	none		True	-10	True	GridWorld	Pentagon	FullObsDiscrete	Individual_Q	1.0	0.05	2500000	5	True	IndivQLearningSlugs/25_2_5_slugs_centralized	slugs_centralized	shields/general_shield	0.05
IndivQLearningSlugs/25_2_5	none		True	-10	True	GridWorld	Pentagon	FullObsDiscrete	Individual_Q	1.0	0.05	2500000	5	True	IndivQLearningSlugs/25_2_5_slugs_decentralized	slugs_decentralized	shields/general_shield	0.05
IndivQLearningSlugs/25_2_5	none		True	-10	True	GridWorld	Pentagon	FullObsDiscrete	Individual_Q	1.0	0.05	2500000	5	True	IndivQLearningSlugs/25_2_5_none	none		0.05
IndivQLearningSlugs/26_2_6	none		True	-10	True	GridWorld	Pentagon	FullObsDiscrete	Individual_Q	1.0	0.05	2500000	6	True	IndivQLearningSlugs/26_2_6_slugs_centralized	slugs_centralized	shields/general_shield	0.05
IndivQLearningSlugs/26_2_6	none		True	-10	True	GridWorld	Pentagon	FullObsDiscrete	Individual_Q	1.0	0.05	2500000	6	True	IndivQLearningSlugs/26_2_6_slugs_decentralized	slugs_decentralized	shields/general_shield	0.05
IndivQLearningSlugs/26_2_6	none		True	-10	True	GridWorld	Pentagon	FullObsDiscrete	Individual_Q	1.0	0.05	2500000	6	True	IndivQLearningSlugs/26_2_6_none	none		0.05
IndivQLearningSlugs/27_2_7	none		True	-10	True	GridWorld	Pentagon	FullObsDiscrete	Individual_Q	1.0	0.05	2500000	7	True	IndivQLearningSlugs/27_2_7_slugs_centralized	slugs_centralized	shields/general_shield	0.05
IndivQLearningSlugs/27_2_7	none		True	-10	True	GridWorld	Pentagon	FullObsDiscrete	Individual_Q	1.0	0.05	2500000	7	True	IndivQLearningSlugs/27_2_7_slugs_decentralized	slugs_decentralized	shields/general_shield	0.05
IndivQLearningSlugs/27_2_7	none		True	-10	True	GridWorld	Pentagon	FullObsDiscrete	Individual_Q	1.0	0.05	2500000	7	True	IndivQLearningSlugs/27_2_7_none	none		0.05
IndivQLearningSlugs/28_2_8	none		True	-10	True	GridWorld	Pentagon	FullObsDiscrete	Individual_Q	1.0	0.05	2500000	8	True	IndivQLearningSlugs/28_2_8_slugs_centralized	slugs_centralized	shields/general_shield	0.05
IndivQLearningSlugs/28_2_8	none		True	-10	True	GridWorld	Pentagon	FullObsDiscrete	Individual_Q	1.0	0.05	2500000	8	True	IndivQLearningSlugs/28_2_8_slugs_decentralized	slugs_decentralized	shields/general_shield	0.05
IndivQLearningSlugs/28_2_8	none		True	-10	True	GridWorld	Pentagon	FullObsDiscrete	Individual_Q	1.0	0.05	2500000	8	True	IndivQLearningSlugs/28_2_8_none	none		0.05
IndivQLearningSlugs/29_2_9	none		True	-10	True	GridWorld	Pentagon	FullObsDiscrete	Individual_Q	1.0	0.05	2500000	9	True	IndivQLearningSlugs/29_2_9_slugs_centralized	slugs_centralized	shields/general_shield	0.05
IndivQLearningSlugs/29_2_9	none		True	-10	True	GridWorld	Pentagon	FullObsDiscrete	Individual_Q	1.0	0.05	2500000	9	True	IndivQLearningSlugs/29_2_9_slugs_decentralized	slugs_decentralized	shields/general_shield	0.05
IndivQLearningSlugs/29_2_9	none		True	-10	True	GridWorld	Pentagon	FullObsDiscrete	Individual_Q	1.0	0.05	2500000	9	True	IndivQLearningSlugs/29_2_9_none	none		0.05
IndivQLearningSlugs/30_3_0	slugs_centralized	shields/general_shield	True	-10	False	GridWorld	Pentagon	FullObsDiscrete	Individual_Q	1.0	0.05	2500000	0	True	IndivQLearningSlugs/30_3_0_slugs_centralized	slugs_centralized	shields/general_shield	0.05
IndivQLearningSlugs/30_3_0	slugs_centralized	shields/general_shield	True	-10	False	GridWorld	Pentagon	FullObsDiscrete	Individual_Q	1.0	0.05	2500000	0	True	IndivQLearningSlugs/30_3_0_slugs_decentralized	slugs_decentralized	shields/general_shield	0.05
IndivQLearningSlugs/30_3_0	slugs_centralized	shields/general_shield	True	-10	False	GridWorld	Pentagon	FullObsDiscrete	Individual_Q	1.0	0.05	2500000	0	True	IndivQLearningSlugs/30_3_0_none	none		0.05
IndivQLearningSlugs/31_3_1	slugs_centralized	shields/general_shield	True	-10	False	GridWorld	Pentagon	FullObsDiscrete	Individual_Q	1.0	0.05	2500000	1	True	IndivQLearningSlugs/31_3_1_slugs_centralized	slugs_centralized	shields/general_shield	0.05
IndivQLearningSlugs/31_3_1	slugs_centralized	shields/general_shield	True	-10	False	GridWorld	Pentagon	FullObsDiscrete	Individual_Q	1.0	0.05	2500000	1	True	IndivQLearningSlugs/31_3_1_slugs_decentralized	slugs_decentralized	shields/general_shield	0.05
IndivQLearningSlugs/31_3_1	slugs_centralized	shields/general_shield	True	-10	False	GridWorld	Pentagon	FullObsDiscrete	Individual_Q	1.0	0.05	2500000	1	True	IndivQLearningSlugs/31_3_1_none	none		0.05
IndivQLearningSlugs/32_3_2	slugs_centralized	shields/general_shield	True	-10	False	GridWorld	Pentagon	FullObsDiscrete	Individual_Q	1.0	0.05	2500000	2	True	IndivQLearningSlugs/32_3_2_slugs_centralized	slugs_centralized	shields/general_shield	0.05
IndivQLearningSlugs/32_3_2	slugs_centralized	shields/general_shield	True	-10	False	GridWorld	Pentagon	FullObsDiscrete	Individual_Q	1.0	0.05	2500000	2	True	IndivQLearningSlugs/32_3_2_slugs_decentralized	slugs_decentralized	shields/general_shield	0.05
IndivQLearningSlugs/32_3_2	slugs_centralized	shields/general_shield	True	-10	False	GridWorld	Pentagon	FullObsDiscrete	Individual_Q	1.0	0.05	2500000	2	True	IndivQLearningSlugs/32_3_2_none	none		0.05
IndivQLearningSlugs/33_3_3	slugs_centralized	shields/general_shield	True	-10	False	GridWorld	Pentagon	FullObsDiscrete	Individual_Q	1.0	0.05	2500000	3	True	IndivQLearningSlugs/33_3_3_slugs_centralized	slugs_centralized	shields/general_shield	0.05
IndivQLearningSlugs/33_3_3	slugs_centralized	shields/general_shield	True	-10	False	GridWorld	Pentagon	FullObsDiscrete	Individual_Q	1.0	0.05	2500000	3	True	IndivQLearningSlugs/33_3_3_slugs_decentralized	slugs_decentralized	shields/general_shield	0.05
IndivQLearningSlugs/33_3_3	slugs_centralized	shields/general_shield	True	-10	False	GridWorld	Pentagon	FullObsDiscrete	Individual_Q	1.0	0.05	2500000	3	True	IndivQLearningSlugs/33_3_3_none	none		0.05
IndivQLearningSlugs/34_3_4	slugs_centralized	shields/general_shield	True	-10	False	GridWorld	Pentagon	FullObsDiscrete	Individual_Q	1.0	0.05	2500000	4	True	IndivQLearningSlugs/34_3_4_slugs_centralized	slugs_centralized	shields/general_shield	0.05
IndivQLearningSlugs/34_3_4	slugs_centralized	shields/general_shield	True	-10	False	GridWorld	Pentagon	FullObsDiscrete	Individual_Q	1.0	0.05	2500000	4	True	IndivQLearningSlugs/34_3_4_slugs_decentralized	slugs_decentralized	shields/general_shield	0.05
IndivQLearningSlugs/34_3_4	slugs_centralized	shields/general_shield	True	-10	False	GridWorld	Pentagon	FullObsDiscrete	Individual_Q	1.0	0.05	2500000	4	True	IndivQLearningSlugs/34_3_4_none	none		0.05
IndivQLearningSlugs/35_3_5	slugs_centralized	shields/general_shield	True	-10	False	GridWorld	Pentagon	FullObsDiscrete	Individual_Q	1.0	0.05	2500000	5	True	IndivQLearningSlugs/35_3_5_slugs_centralized	slugs_centralized	shields/general_shield	0.05
IndivQLearningSlugs/35_3_5	slugs_centralized	shields/general_shield	True	-10	False	GridWorld	Pentagon	FullObsDiscrete	Individual_Q	1.0	0.05	2500000	5	True	IndivQLearningSlugs/35_3_5_slugs_decentralized	slugs_decentralized	shields/general_shield	0.05
IndivQLearningSlugs/35_3_5	slugs_centralized	shields/general_shield	True	-10	False	GridWorld	Pentagon	FullObsDiscrete	Individual_Q	1.0	0.05	2500000	5	True	IndivQLearningSlugs/35_3_5_none	none		0.05
IndivQLearningSlugs/36_3_6	slugs_centralized	shields/general_shield	True	-10	False	GridWorld	Pentagon	FullObsDiscrete	Individual_Q	1.0	0.05	2500000	6	True	IndivQLearningSlugs/36_3_6_slugs_centralized	slugs_centralized	shields/general_shield	0.05
IndivQLearningSlugs/36_3_6	slugs_centralized	shields/general_shield	True	-10	False	GridWorld	Pentagon	FullObsDiscrete	Individual_Q	1.0	0.05	2500000	6	True	IndivQLearningSlugs/36_3_6_slugs_decentralized	slugs_decentralized	shields/general_shield	0.05
IndivQLearningSlugs/36_3_6	slugs_centralized	shields/general_shield	True	-10	False	GridWorld	Pentagon	FullObsDiscrete	Individual_Q	1.0	0.05	2500000	6	True	IndivQLearningSlugs/36_3_6_none	none		0.05
IndivQLearningSlugs/37_3_7	slugs_centralized	shields/general_shield	True	-10	False	GridWorld	Pentagon	FullObsDiscrete	Individual_Q	1.0	0.05	2500000	7	True	IndivQLearningSlugs/37_3_7_slugs_centralized	slugs_centralized	shields/general_shield	0.05
IndivQLearningSlugs/37_3_7	slugs_centralized	shields/general_shield	True	-10	False	GridWorld	Pentagon	FullObsDiscrete	Individual_Q	1.0	0.05	2500000	7	True	IndivQLearningSlugs/37_3_7_slugs_decentralized	slugs_decentralized	shields/general_shield	0.05
IndivQLearningSlugs/37_3_7	slugs_centralized	shields/general_shield	True	-10	False	GridWorld	Pentagon	FullObsDiscrete	Individual_Q	1.0	0.05	2500000	7	True	IndivQLearningSlugs/37_3_7_none	none		0.05
IndivQLearningSlugs/38_3_8	slugs_centralized	shields/general_shield	True	-10	False	GridWorld	Pentagon	FullObsDiscrete	Individual_Q	1.0	0.05	2500000	8	True	IndivQLearningSlugs/38_3_8_slugs_centralized	slugs_centralized	shields/general_shield	0.05
IndivQLearningSlugs/38_3_8	slugs_centralized	shields/general_shield	True	-10	False	GridWorld	Pentagon	FullObsDiscrete	Individual_Q	1.0	0.05	2500000	8	True	IndivQLearningSlugs/38_3_8_slugs_decentralized	slugs_decentralized	shields/general_shield	0.05
IndivQLearningSlugs/38_3_8	slugs_centralized	shields/general_shield	True	-10	False	GridWorld	Pentagon	FullObsDiscrete	Individual_Q	1.0	0.05	2500000	8	True	IndivQLearningSlugs/38_3_8_none	none		0.05
IndivQLearningSlugs/39_3_9	slugs_centralized	shields/general_shield	True	-10	False	GridWorld	Pentagon	FullObsDiscrete	Individual_Q	1.0	0.05	2500000	9	True	IndivQLearningSlugs/39_3_9_slugs_centralized	slugs_centralized	shields/general_shield	0.05
IndivQLearningSlugs/39_3_9	slugs_centralized	shields/general_shield	True	-10	False	GridWorld	Pentagon	FullObsDiscrete	Individual_Q	1.0	0.05	2500000	9	True	IndivQLearningSlugs/39_3_9_slugs_decentralized	slugs_decentralized	shields/general_shield	0.05
IndivQLearningSlugs/39_3_9	slugs_centralized	shields/general_shield	True	-10	False	GridWorld	Pentagon	FullObsDiscrete	Individual_Q	1.0	0.05	2500000	9	True	IndivQLearningSlugs/39_3_9_none	none		0.05
IndivQLearningSlugs/40_4_0	slugs_decentralized	shields/general_shield	True	-10	False	GridWorld	Pentagon	FullObsDiscrete	Individual_Q	1.0	0.05	2500000	0	True	IndivQLearningSlugs/40_4_0_slugs_centralized	slugs_centralized	shields/general_shield	0.05
IndivQLearningSlugs/40_4_0	slugs_decentralized	shields/general_shield	True	-10	False	GridWorld	Pentagon	FullObsDiscrete	Individual_Q	1.0	0.05	2500000	0	True	IndivQLearningSlugs/40_4_0_slugs_decentralized	slugs_decentralized	shields/general_shield	0.05
IndivQLearningSlugs/40_4_0	slugs_decentralized	shields/general_shield	True	-10	False	GridWorld	Pentagon	FullObsDiscrete	Individual_Q	1.0	0.05	2500000	0	True	IndivQLearningSlugs/40_4_0_none	none		0.05
IndivQLearningSlugs/41_4_1	slugs_decentralized	shields/general_shield	True	-10	False	GridWorld	Pentagon	FullObsDiscrete	Individual_Q	1.0	0.05	2500000	1	True	IndivQLearningSlugs/41_4_1_slugs_centralized	slugs_centralized	shields/general_shield	0.05
IndivQLearningSlugs/41_4_1	slugs_decentralized	shields/general_shield	True	-10	False	GridWorld	Pentagon	FullObsDiscrete	Individual_Q	1.0	0.05	2500000	1	True	IndivQLearningSlugs/41_4_1_slugs_decentralized	slugs_decentralized	shields/general_shield	0.05
IndivQLearningSlugs/41_4_1	slugs_decentralized	shields/general_shield	True	-10	False	GridWorld	Pentagon	FullObsDiscrete	Individual_Q	1.0	0.05	2500000	1	True	IndivQLearningSlugs/41_4_1_none	none		0.05
IndivQLearningSlugs/42_4_2	slugs_decentralized	shields/general_shield	True	-10	False	GridWorld	Pentagon	FullObsDiscrete	Individual_Q	1.0	0.05	2500000	2	True	IndivQLearningSlugs/42_4_2_slugs_centralized	slugs_centralized	shields/general_shield	0.05
IndivQLearningSlugs/42_4_2	slugs_decentralized	shields/general_shield	True	-10	False	GridWorld	Pentagon	FullObsDiscrete	Individual_Q	1.0	0.05	2500000	2	True	IndivQLearningSlugs/42_4_2_slugs_decentralized	slugs_decentralized	shields/general_shield	0.05
IndivQLearningSlugs/42_4_2	slugs_decentralized	shields/general_shield	True	-10	False	GridWorld	Pentagon	FullObsDiscrete	Individual_Q	1.0	0.05	2500000	2	True	IndivQLearningSlugs/42_4_2_none	none		0.05
IndivQLearningSlugs/43_4_3	slugs_decentralized	shields/general_shield	True	-10	False	GridWorld	Pentagon	FullObsDiscrete	Individual_Q	1.0	0.05	2500000	3	True	IndivQLearningSlugs/43_4_3_slugs_centralized	slugs_centralized	shields/general_shield	0.05
IndivQLearningSlugs/43_4_3	slugs_decentralized	shields/general_shield	True	-10	False	GridWorld	Pentagon	FullObsDiscrete	Individual_Q	1.0	0.05	2500000	3	True	IndivQLearningSlugs/43_4_3_slugs_decentralized	slugs_decentralized	shields/general_shield	0.05
IndivQLearningSlugs/43_4_3	slugs_decentralized	shields/general_shield	True	-10	False	GridWorld	Pentagon	FullObsDiscrete	Individual_Q	1.0	0.05	2500000	3	True	IndivQLearningSlugs/43_4_3_none	none		0.05
IndivQLearningSlugs/44_4_4	slugs_decentralized	shields/general_shield	True	-10	False	GridWorld	Pentagon	FullObsDiscrete	Individual_Q	1.0	0.05	2500000	4	True	IndivQLearningSlugs/44_4_4_slugs_centralized	slugs_centralized	shields/general_shield	0.05
IndivQLearningSlugs/44_4_4	slugs_decentralized	shields/general_shield	True	-10	False	GridWorld	Pentagon	FullObsDiscrete	Individual_Q	1.0	0.05	2500000	4	True	IndivQLearningSlugs/44_4_4_slugs_decentralized	slugs_decentralized	shields/general_shield	0.05
IndivQLearningSlugs/44_4_4	slugs_decentralized	shields/general_shield	True	-10	False	GridWorld	Pentagon	FullObsDiscrete	Individual_Q	1.0	0.05	2500000	4	True	IndivQLearningSlugs/44_4_4_none	none		0.05
IndivQLearningSlugs/45_4_5	slugs_decentralized	shields/general_shield	True	-10	False	GridWorld	Pentagon	FullObsDiscrete	Individual_Q	1.0	0.05	2500000	5	True	IndivQLearningSlugs/45_4_5_slugs_centralized	slugs_centralized	shields/general_shield	0.05
IndivQLearningSlugs/45_4_5	slugs_decentralized	shields/general_shield	True	-10	False	GridWorld	Pentagon	FullObsDiscrete	Individual_Q	1.0	0.05	2500000	5	True	IndivQLearningSlugs/45_4_5_slugs_decentralized	slugs_decentralized	shields/general_shield	0.05
IndivQLearningSlugs/45_4_5	slugs_decentralized	shields/general_shield	True	-10	False	GridWorld	Pentagon	FullObsDiscrete	Individual_Q	1.0	0.05	2500000	5	True	IndivQLearningSlugs/45_4_5_none	none		0.05
IndivQLearningSlugs/46_4_6	slugs_decentralized	shields/general_shield	True	-10	False	GridWorld	Pentagon	FullObsDiscrete	Individual_Q	1.0	0.05	2500000	6	True	IndivQLearningSlugs/46_4_6_slugs_centralized	slugs_centralized	shields/general_shield	0.05
IndivQLearningSlugs/46_4_6	slugs_decentralized	shields/general_shield	True	-10	False	GridWorld	Pentagon	FullObsDiscrete	Individual_Q	1.0	0.05	2500000	6	True	IndivQLearningSlugs/46_4_6_slugs_decentralized	slugs_decentralized	shields/general_shield	0.05
IndivQLearningSlugs/46_4_6	slugs_decentralized	shields/general_shield	True	-10	False	GridWorld	Pentagon	FullObsDiscrete	Individual_Q	1.0	0.05	2500000	6	True	IndivQLearningSlugs/46_4_6_none	none		0.05
IndivQLearningSlugs/47_4_7	slugs_decentralized	shields/general_shield	True	-10	False	GridWorld	Pentagon	FullObsDiscrete	Individual_Q	1.0	0.05	2500000	7	True	IndivQLearningSlugs/47_4_7_slugs_centralized	slugs_centralized	shields/general_shield	0.05
IndivQLearningSlugs/47_4_7	slugs_decentralized	shields/general_shield	True	-10	False	GridWorld	Pentagon	FullObsDiscrete	Individual_Q	1.0	0.05	2500000	7	True	IndivQLearningSlugs/47_4_7_slugs_decentralized	slugs_decentralized	shields/general_shield	0.05
IndivQLearningSlugs/47_4_7	slugs_decentralized	shields/general_shield	True	-10	False	GridWorld	Pentagon	FullObsDiscrete	Individual_Q	1.0	0.05	2500000	7	True	IndivQLearningSlugs/47_4_7_none	none		0.05
IndivQLearningSlugs/48_4_8	slugs_decentralized	shields/general_shield	True	-10	False	GridWorld	Pentagon	FullObsDiscrete	Individual_Q	1.0	0.05	2500000	8	True	IndivQLearningSlugs/48_4_8_slugs_centralized	slugs_centralized	shields/general_shield	0.05
IndivQLearningSlugs/48_4_8	slugs_decentralized	shields/general_shield	True	-10	False	GridWorld	Pentagon	FullObsDiscrete	Individual_Q	1.0	0.05	2500000	8	True	IndivQLearningSlugs/48_4_8_slugs_decentralized	slugs_decentralized	shields/general_shield	0.05
IndivQLearningSlugs/48_4_8	slugs_decentralized	shields/general_shield	True	-10	False	GridWorld	Pentagon	FullObsDiscrete	Individual_Q	1.0	0.05	2500000	8	True	IndivQLearningSlugs/48_4_8_none	none		0.05
IndivQLearningSlugs/49_4_9	slugs_decentralized	shields/general_shield	True	-10	False	GridWorld	Pentagon	FullObsDiscrete	Individual_Q	1.0	0.05	2500000	9	True	IndivQLearningSlugs/49_4_9_slugs_centralized	slugs_centralized	shields/general_shield	0.05
IndivQLearningSlugs/49_4_9	slugs_decentralized	shields/general_shield	True	-10	False	GridWorld	Pentagon	FullObsDiscrete	Individual_Q	1.0	0.05	2500000	9	True	IndivQLearningSlugs/49_4_9_slugs_decentralized	slugs_decentralized	shields/general_shield	0.05
IndivQLearningSlugs/49_4_9	slugs_decentralized	shields/general_shield	True	-10	False	GridWorld	Pentagon	FullObsDiscrete	Individual_Q	1.0	0.05	2500000	9	True	IndivQLearningSlugs/49_4_9_none	none		0.05
IndivQLearningSlugs/50_5_0	none		True	-10	False	GridWorld	Pentagon	FullObsDiscrete	Individual_Q	1.0	0.05	2500000	0	True	IndivQLearningSlugs/50_5_0_slugs_centralized	slugs_centralized	shields/general_shield	0.05
IndivQLearningSlugs/50_5_0	none		True	-10	False	GridWorld	Pentagon	FullObsDiscrete	Individual_Q	1.0	0.05	2500000	0	True	IndivQLearningSlugs/50_5_0_slugs_decentralized	slugs_decentralized	shields/general_shield	0.05
IndivQLearningSlugs/50_5_0	none		True	-10	False	GridWorld	Pentagon	FullObsDiscrete	Individual_Q	1.0	0.05	2500000	0	True	IndivQLearningSlugs/50_5_0_none	none		0.05
IndivQLearningSlugs/51_5_1	none		True	-10	False	GridWorld	Pentagon	FullObsDiscrete	Individual_Q	1.0	0.05	2500000	1	True	IndivQLearningSlugs/51_5_1_slugs_centralized	slugs_centralized	shields/general_shield	0.05
IndivQLearningSlugs/51_5_1	none		True	-10	False	GridWorld	Pentagon	FullObsDiscrete	Individual_Q	1.0	0.05	2500000	1	True	IndivQLearningSlugs/51_5_1_slugs_decentralized	slugs_decentralized	shields/general_shield	0.05
IndivQLearningSlugs/51_5_1	none		True	-10	False	GridWorld	Pentagon	FullObsDiscrete	Individual_Q	1.0	0.05	2500000	1	True	IndivQLearningSlugs/51_5_1_none	none		0.05
IndivQLearningSlugs/52_5_2	none		True	-10	False	GridWorld	Pentagon	FullObsDiscrete	Individual_Q	1.0	0.05	2500000	2	True	IndivQLearningSlugs/52_5_2_slugs_centralized	slugs_centralized	shields/general_shield	0.05
IndivQLearningSlugs/52_5_2	none		True	-10	False	GridWorld	Pentagon	FullObsDiscrete	Individual_Q	1.0	0.05	2500000	2	True	IndivQLearningSlugs/52_5_2_slugs_decentralized	slugs_decentralized	shields/general_shield	0.05
IndivQLearningSlugs/52_5_2	none		True	-10	False	GridWorld	Pentagon	FullObsDiscrete	Individual_Q	1.0	0.05	2500000	2	True	IndivQLearningSlugs/52_5_2_none	none		0.05
IndivQLearningSlugs/53_5_3	none		True	-10	False	GridWorld	Pentagon	FullObsDiscrete	Individual_Q	1.0	0.05	2500000	3	True	IndivQLearningSlugs/53_5_3_slugs_centralized	slugs_centralized	shields/general_shield	0.05
IndivQLearningSlugs/53_5_3	none		True	-10	False	GridWorld	Pentagon	FullObsDiscrete	Individual_Q	1.0	0.05	2500000	3	True	IndivQLearningSlugs/53_5_3_slugs_decentralized	slugs_decentralized	shields/general_shield	0.05
IndivQLearningSlugs/53_5_3	none		True	-10	False	GridWorld	Pentagon	FullObsDiscrete	Individual_Q	1.0	0.05	2500000	3	True	IndivQLearningSlugs/53_5_3_none	none		0.05
IndivQLearningSlugs/54_5_4	none		True	-10	False	GridWorld	Pentagon	FullObsDiscrete	Individual_Q	1.0	0.05	2500000	4	True	IndivQLearningSlugs/54_5_4_slugs_centralized	slugs_centralized	shields/general_shield	0.05
IndivQLearningSlugs/54_5_4	none		True	-10	False	GridWorld	Pentagon	FullObsDiscrete	Individual_Q	1.0	0.05	2500000	4	True	IndivQLearningSlugs/54_5_4_slugs_decentralized	slugs_decentralized	shields/general_shield	0.05
IndivQLearningSlugs/54_5_4	none		True	-10	False	GridWorld	Pentagon	FullObsDiscrete	Individual_Q	1.0	0.05	2500000	4	True	IndivQLearningSlugs/54_5_4_none	none		0.05
IndivQLearningSlugs/55_5_5	none		True	-10	False	GridWorld	Pentagon	FullObsDiscrete	Individual_Q	1.0	0.05	2500000	5	True	IndivQLearningSlugs/55_5_5_slugs_centralized	slugs_centralized	shields/general_shield	0.05
IndivQLearningSlugs/55_5_5	none		True	-10	False	GridWorld	Pentagon	FullObsDiscrete	Individual_Q	1.0	0.05	2500000	5	True	IndivQLearningSlugs/55_5_5_slugs_decentralized	slugs_decentralized	shields/general_shield	0.05
IndivQLearningSlugs/55_5_5	none		True	-10	False	GridWorld	Pentagon	FullObsDiscrete	Individual_Q	1.0	0.05	2500000	5	True	IndivQLearningSlugs/55_5_5_none	none		0.05
IndivQLearningSlugs/56_5_6	none		True	-10	False	GridWorld	Pentagon	FullObsDiscrete	Individual_Q	1.0	0.05	2500000	6	True	IndivQLearningSlugs/56_5_6_slugs_centralized	slugs_centralized	shields/general_shield	0.05
IndivQLearningSlugs/56_5_6	none		True	-10	False	GridWorld	Pentagon	FullObsDiscrete	Individual_Q	1.0	0.05	2500000	6	True	IndivQLearningSlugs/56_5_6_slugs_decentralized	slugs_decentralized	shields/general_shield	0.05
IndivQLearningSlugs/56_5_6	none		True	-10	False	GridWorld	Pentagon	FullObsDiscrete	Individual_Q	1.0	0.05	2500000	6	True	IndivQLearningSlugs/56_5_6_none	none		0.05
IndivQLearningSlugs/57_5_7	none		True	-10	False	GridWorld	Pentagon	FullObsDiscrete	Individual_Q	1.0	0.05	2500000	7	True	IndivQLearningSlugs/57_5_7_slugs_centralized	slugs_centralized	shields/general_shield	0.05
IndivQLearningSlugs/57_5_7	none		True	-10	False	GridWorld	Pentagon	FullObsDiscrete	Individual_Q	1.0	0.05	2500000	7	True	IndivQLearningSlugs/57_5_7_slugs_decentralized	slugs_decentralized	shields/general_shield	0.05
IndivQLearningSlugs/57_5_7	none		True	-10	False	GridWorld	Pentagon	FullObsDiscrete	Individual_Q	1.0	0.05	2500000	7	True	IndivQLearningSlugs/57_5_7_none	none		0.05
IndivQLearningSlugs/58_5_8	none		True	-10	False	GridWorld	Pentagon	FullObsDiscrete	Individual_Q	1.0	0.05	2500000	8	True	IndivQLearningSlugs/58_5_8_slugs_centralized	slugs_centralized	shields/general_shield	0.05
IndivQLearningSlugs/58_5_8	none		True	-10	False	GridWorld	Pentagon	FullObsDiscrete	Individual_Q	1.0	0.05	2500000	8	True	IndivQLearningSlugs/58_5_8_slugs_decentralized	slugs_decentralized	shields/general_shield	0.05
IndivQLearningSlugs/58_5_8	none		True	-10	False	GridWorld	Pentagon	FullObsDiscrete	Individual_Q	1.0	0.05	2500000	8	True	IndivQLearningSlugs/58_5_8_none	none		0.05
IndivQLearningSlugs/59_5_9	none		True	-10	False	GridWorld	Pentagon	FullObsDiscrete	Individual_Q	1.0	0.05	2500000	9	True	IndivQLearningSlugs/59_5_9_slugs_centralized	slugs_centralized	shields/general_shield	0.05
IndivQLearningSlugs/59_5_9	none		True	-10	False	GridWorld	Pentagon	FullObsDiscrete	Individual_Q	1.0	0.05	2500000	9	True	IndivQLearningSlugs/59_5_9_slugs_decentralized	slugs_decentralized	shields/general_shield	0.05
IndivQLearningSlugs/59_5_9	none		True	-10	False	GridWorld	Pentagon	FullObsDiscrete	Individual_Q	1.0	0.05	2500000	9	True	IndivQLearningSlugs/59_5_9_none	none		0.05
IndivQLearningSlugs/60_6_0	slugs_centralized	shields/general_shield	True	-10	True	GridWorld	ISR	FullObsDiscrete	Individual_Q	1.0	0.05	2500000	0	True	IndivQLearningSlugs/60_6_0_slugs_centralized	slugs_centralized	shields/general_shield	0.05
IndivQLearningSlugs/60_6_0	slugs_centralized	shields/general_shield	True	-10	True	GridWorld	ISR	FullObsDiscrete	Individual_Q	1.0	0.05	2500000	0	True	IndivQLearningSlugs/60_6_0_slugs_decentralized	slugs_decentralized	shields/general_shield	0.05
IndivQLearningSlugs/60_6_0	slugs_centralized	shields/general_shield	True	-10	True	GridWorld	ISR	FullObsDiscrete	Individual_Q	1.0	0.05	2500000	0	True	IndivQLearningSlugs/60_6_0_none	none		0.05
IndivQLearningSlugs/61_6_1	slugs_centralized	shields/general_shield	True	-10	True	GridWorld	ISR	FullObsDiscrete	Individual_Q	1.0	0.05	2500000	1	True	IndivQLearningSlugs/61_6_1_slugs_centralized	slugs_centralized	shields/general_shield	0.05
IndivQLearningSlugs/61_6_1	slugs_centralized	shields/general_shield	True	-10	True	GridWorld	ISR	FullObsDiscrete	Individual_Q	1.0	0.05	2500000	1	True	IndivQLearningSlugs/61_6_1_slugs_decentralized	slugs_decentralized	shields/general_shield	0.05
IndivQLearningSlugs/61_6_1	slugs_centralized	shields/general_shield	True	-10	True	GridWorld	ISR	FullObsDiscrete	Individual_Q	1.0	0.05	2500000	1	True	IndivQLearningSlugs/61_6_1_none	none		0.05
IndivQLearningSlugs/62_6_2	slugs_centralized	shields/general_shield	True	-10	True	GridWorld	ISR	FullObsDiscrete	Individual_Q	1.0	0.05	2500000	2	True	IndivQLearningSlugs/62_6_2_slugs_centralized	slugs_centralized	shields/general_shield	0.05
IndivQLearningSlugs/62_6_2	slugs_centralized	shields/general_shield	True	-10	True	GridWorld	ISR	FullObsDiscrete	Individual_Q	1.0	0.05	2500000	2	True	IndivQLearningSlugs/62_6_2_slugs_decentralized	slugs_decentralized	shields/general_shield	0.05
IndivQLearningSlugs/62_6_2	slugs_centralized	shields/general_shield	True	-10	True	GridWorld	ISR	FullObsDiscrete	Individual_Q	1.0	0.05	2500000	2	True	IndivQLearningSlugs/62_6_2_none	none		0.05
IndivQLearningSlugs/63_6_3	slugs_centralized	shields/general_shield	True	-10	True	GridWorld	ISR	FullObsDiscrete	Individual_Q	1.0	0.05	2500000	3	True	IndivQLearningSlugs/63_6_3_slugs_centralized	slugs_centralized	shields/general_shield	0.05
IndivQLearningSlugs/63_6_3	slugs_centralized	shields/general_shield	True	-10	True	GridWorld	ISR	FullObsDiscrete	Individual_Q	1.0	0.05	2500000	3	True	IndivQLearningSlugs/63_6_3_slugs_decentralized	slugs_decentralized	shields/general_shield	0.05
IndivQLearningSlugs/63_6_3	slugs_centralized	shields/general_shield	True	-10	True	GridWorld	ISR	FullObsDiscrete	Individual_Q	1.0	0.05	2500000	3	True	IndivQLearningSlugs/63_6_3_none	none		0.05
IndivQLearningSlugs/64_6_4	slugs_centralized	shields/general_shield	True	-10	True	GridWorld	ISR	FullObsDiscrete	Individual_Q	1.0	0.05	2500000	4	True	IndivQLearningSlugs/64_6_4_slugs_centralized	slugs_centralized	shields/general_shield	0.05
IndivQLearningSlugs/64_6_4	slugs_centralized	shields/general_shield	True	-10	True	GridWorld	ISR	FullObsDiscrete	Individual_Q	1.0	0.05	2500000	4	True	IndivQLearningSlugs/64_6_4_slugs_decentralized	slugs_decentralized	shields/general_shield	0.05
IndivQLearningSlugs/64_6_4	slugs_centralized	shields/general_shield	True	-10	True	GridWorld	ISR	FullObsDiscrete	Individual_Q	1.0	0.05	2500000	4	True	IndivQLearningSlugs/64_6_4_none	none		0.05
IndivQLearningSlugs/65_6_5	slugs_centralized	shields/general_shield	True	-10	True	GridWorld	ISR	FullObsDiscrete	Individual_Q	1.0	0.05	2500000	5	True	IndivQLearningSlugs/65_6_5_slugs_centralized	slugs_centralized	shields/general_shield	0.05
IndivQLearningSlugs/65_6_5	slugs_centralized	shields/general_shield	True	-10	True	GridWorld	ISR	FullObsDiscrete	Individual_Q	1.0	0.05	2500000	5	True	IndivQLearningSlugs/65_6_5_slugs_decentralized	slugs_decentralized	shields/general_shield	0.05
IndivQLearningSlugs/65_6_5	slugs_centralized	shields/general_shield	True	-10	True	GridWorld	ISR	FullObsDiscrete	Individual_Q	1.0	0.05	2500000	5	True	IndivQLearningSlugs/65_6_5_none	none		0.05
IndivQLearningSlugs/66_6_6	slugs_centralized	shields/general_shield	True	-10	True	GridWorld	ISR	FullObsDiscrete	Individual_Q	1.0	0.05	2500000	6	True	IndivQLearningSlugs/66_6_6_slugs_centralized	slugs_centralized	shields/general_shield	0.05
IndivQLearningSlugs/66_6_6	slugs_centralized	shields/general_shield	True	-10	True	GridWorld	ISR	FullObsDiscrete	Individual_Q	1.0	0.05	2500000	6	True	IndivQLearningSlugs/66_6_6_slugs_decentralized	slugs_decentralized	shields/general_shield	0.05
IndivQLearningSlugs/66_6_6	slugs_centralized	shields/general_shield	True	-10	True	GridWorld	ISR	FullObsDiscrete	Individual_Q	1.0	0.05	2500000	6	True	IndivQLearningSlugs/66_6_6_none	none		0.05
IndivQLearningSlugs/67_6_7	slugs_centralized	shields/general_shield	True	-10	True	GridWorld	ISR	FullObsDiscrete	Individual_Q	1.0	0.05	2500000	7	True	IndivQLearningSlugs/67_6_7_slugs_centralized	slugs_centralized	shields/general_shield	0.05
IndivQLearningSlugs/67_6_7	slugs_centralized	shields/general_shield	True	-10	True	GridWorld	ISR	FullObsDiscrete	Individual_Q	1.0	0.05	2500000	7	True	IndivQLearningSlugs/67_6_7_slugs_decentralized	slugs_decentralized	shields/general_shield	0.05
IndivQLearningSlugs/67_6_7	slugs_centralized	shields/general_shield	True	-10	True	GridWorld	ISR	FullObsDiscrete	Individual_Q	1.0	0.05	2500000	7	True	IndivQLearningSlugs/67_6_7_none	none		0.05
IndivQLearningSlugs/68_6_8	slugs_centralized	shields/general_shield	True	-10	True	GridWorld	ISR	FullObsDiscrete	Individual_Q	1.0	0.05	2500000	8	True	IndivQLearningSlugs/68_6_8_slugs_centralized	slugs_centralized	shields/general_shield	0.05
IndivQLearningSlugs/68_6_8	slugs_centralized	shields/general_shield	True	-10	True	GridWorld	ISR	FullObsDiscrete	Individual_Q	1.0	0.05	2500000	8	True	IndivQLearningSlugs/68_6_8_slugs_decentralized	slugs_decentralized	shields/general_shield	0.05
IndivQLearningSlugs/68_6_8	slugs_centralized	shields/general_shield	True	-10	True	GridWorld	ISR	FullObsDiscrete	Individual_Q	1.0	0.05	2500000	8	True	IndivQLearningSlugs/68_6_8_none	none		0.05
IndivQLearningSlugs/69_6_9	slugs_centralized	shields/general_shield	True	-10	True	GridWorld	ISR	FullObsDiscrete	Individual_Q	1.0	0.05	2500000	9	True	IndivQLearningSlugs/69_6_9_slugs_centralized	slugs_centralized	shields/general_shield	0.05
IndivQLearningSlugs/69_6_9	slugs_centralized	shields/general_shield	True	-10	True	GridWorld	ISR	FullObsDiscrete	Individual_Q	1.0	0.05	2500000	9	True	IndivQLearningSlugs/69_6_9_slugs_decentralized	slugs_decentralized	shields/general_shield	0.05
IndivQLearningSlugs/69_6_9	slugs_centralized	shields/general_shield	True	-10	True	GridWorld	ISR	FullObsDiscrete	Individual_Q	1.0	0.05	2500000	9	True	IndivQLearningSlugs/69_6_9_none	none		0.05
IndivQLearningSlugs/70_7_0	slugs_decentralized	shields/general_shield	True	-10	True	GridWorld	ISR	FullObsDiscrete	Individual_Q	1.0	0.05	2500000	0	True	IndivQLearningSlugs/70_7_0_slugs_centralized	slugs_centralized	shields/general_shield	0.05
IndivQLearningSlugs/70_7_0	slugs_decentralized	shields/general_shield	True	-10	True	GridWorld	ISR	FullObsDiscrete	Individual_Q	1.0	0.05	2500000	0	True	IndivQLearningSlugs/70_7_0_slugs_decentralized	slugs_decentralized	shields/general_shield	0.05
IndivQLearningSlugs/70_7_0	slugs_decentralized	shields/general_shield	True	-10	True	GridWorld	ISR	FullObsDiscrete	Individual_Q	1.0	0.05	2500000	0	True	IndivQLearningSlugs/70_7_0_none	none		0.05
IndivQLearningSlugs/71_7_1	slugs_decentralized	shields/general_shield	True	-10	True	GridWorld	ISR	FullObsDiscrete	Individual_Q	1.0	0.05	2500000	1	True	IndivQLearningSlugs/71_7_1_slugs_centralized	slugs_centralized	shields/general_shield	0.05
IndivQLearningSlugs/71_7_1	slugs_decentralized	shields/general_shield	True	-10	True	GridWorld	ISR	FullObsDiscrete	Individual_Q	1.0	0.05	2500000	1	True	IndivQLearningSlugs/71_7_1_slugs_decentralized	slugs_decentralized	shields/general_shield	0.05
IndivQLearningSlugs/71_7_1	slugs_decentralized	shields/general_shield	True	-10	True	GridWorld	ISR	FullObsDiscrete	Individual_Q	1.0	0.05	2500000	1	True	IndivQLearningSlugs/71_7_1_none	none		0.05
IndivQLearningSlugs/72_7_2	slugs_decentralized	shields/general_shield	True	-10	True	GridWorld	ISR	FullObsDiscrete	Individual_Q	1.0	0.05	2500000	2	True	IndivQLearningSlugs/72_7_2_slugs_centralized	slugs_centralized	shields/general_shield	0.05
IndivQLearningSlugs/72_7_2	slugs_decentralized	shields/general_shield	True	-10	True	GridWorld	ISR	FullObsDiscrete	Individual_Q	1.0	0.05	2500000	2	True	IndivQLearningSlugs/72_7_2_slugs_decentralized	slugs_decentralized	shields/general_shield	0.05
IndivQLearningSlugs/72_7_2	slugs_decentralized	shields/general_shield	True	-10	True	GridWorld	ISR	FullObsDiscrete	Individual_Q	1.0	0.05	2500000	2	True	IndivQLearningSlugs/72_7_2_none	none		0.05
IndivQLearningSlugs/73_7_3	slugs_decentralized	shields/general_shield	True	-10	True	GridWorld	ISR	FullObsDiscrete	Individual_Q	1.0	0.05	2500000	3	True	IndivQLearningSlugs/73_7_3_slugs_centralized	slugs_centralized	shields/general_shield	0.05
IndivQLearningSlugs/73_7_3	slugs_decentralized	shields/general_shield	True	-10	True	GridWorld	ISR	FullObsDiscrete	Individual_Q	1.0	0.05	2500000	3	True	IndivQLearningSlugs/73_7_3_slugs_decentralized	slugs_decentralized	shields/general_shield	0.05
IndivQLearningSlugs/73_7_3	slugs_decentralized	shields/general_shield	True	-10	True	GridWorld	ISR	FullObsDiscrete	Individual_Q	1.0	0.05	2500000	3	True	IndivQLearningSlugs/73_7_3_none	none		0.05
IndivQLearningSlugs/74_7_4	slugs_decentralized	shields/general_shield	True	-10	True	GridWorld	ISR	FullObsDiscrete	Individual_Q	1.0	0.05	2500000	4	True	IndivQLearningSlugs/74_7_4_slugs_centralized	slugs_centralized	shields/general_shield	0.05
IndivQLearningSlugs/74_7_4	slugs_decentralized	shields/general_shield	True	-10	True	GridWorld	ISR	FullObsDiscrete	Individual_Q	1.0	0.05	2500000	4	True	IndivQLearningSlugs/74_7_4_slugs_decentralized	slugs_decentralized	shields/general_shield	0.05
IndivQLearningSlugs/74_7_4	slugs_decentralized	shields/general_shield	True	-10	True	GridWorld	ISR	FullObsDiscrete	Individual_Q	1.0	0.05	2500000	4	True	IndivQLearningSlugs/74_7_4_none	none		0.05
IndivQLearningSlugs/75_7_5	slugs_decentralized	shields/general_shield	True	-10	True	GridWorld	ISR	FullObsDiscrete	Individual_Q	1.0	0.05	2500000	5	True	IndivQLearningSlugs/75_7_5_slugs_centralized	slugs_centralized	shields/general_shield	0.05
IndivQLearningSlugs/75_7_5	slugs_decentralized	shields/general_shield	True	-10	True	GridWorld	ISR	FullObsDiscrete	Individual_Q	1.0	0.05	2500000	5	True	IndivQLearningSlugs/75_7_5_slugs_decentralized	slugs_decentralized	shields/general_shield	0.05
IndivQLearningSlugs/75_7_5	slugs_decentralized	shields/general_shield	True	-10	True	GridWorld	ISR	FullObsDiscrete	Individual_Q	1.0	0.05	2500000	5	True	IndivQLearningSlugs/75_7_5_none	none		0.05
IndivQLearningSlugs/76_7_6	slugs_decentralized	shields/general_shield	True	-10	True	GridWorld	ISR	FullObsDiscrete	Individual_Q	1.0	0.05	2500000	6	True	IndivQLearningSlugs/76_7_6_slugs_centralized	slugs_centralized	shields/general_shield	0.05
IndivQLearningSlugs/76_7_6	slugs_decentralized	shields/general_shield	True	-10	True	GridWorld	ISR	FullObsDiscrete	Individual_Q	1.0	0.05	2500000	6	True	IndivQLearningSlugs/76_7_6_slugs_decentralized	slugs_decentralized	shields/general_shield	0.05
IndivQLearningSlugs/76_7_6	slugs_decentralized	shields/general_shield	True	-10	True	GridWorld	ISR	FullObsDiscrete	Individual_Q	1.0	0.05	2500000	6	True	IndivQLearningSlugs/76_7_6_none	none		0.05
IndivQLearningSlugs/77_7_7	slugs_decentralized	shields/general_shield	True	-10	True	GridWorld	ISR	FullObsDiscrete	Individual_Q	1.0	0.05	2500000	7	True	IndivQLearningSlugs/77_7_7_slugs_centralized	slugs_centralized	shields/general_shield	0.05
IndivQLearningSlugs/77_7_7	slugs_decentralized	shields/general_shield	True	-10	True	GridWorld	ISR	FullObsDiscrete	Individual_Q	1.0	0.05	2500000	7	True	IndivQLearningSlugs/77_7_7_slugs_decentralized	slugs_decentralized	shields/general_shield	0.05
IndivQLearningSlugs/77_7_7	slugs_decentralized	shields/general_shield	True	-10	True	GridWorld	ISR	FullObsDiscrete	Individual_Q	1.0	0.05	2500000	7	True	IndivQLearningSlugs/77_7_7_none	none		0.05
IndivQLearningSlugs/78_7_8	slugs_decentralized	shields/general_shield	True	-10	True	GridWorld	ISR	FullObsDiscrete	Individual_Q	1.0	0.05	2500000	8	True	IndivQLearningSlugs/78_7_8_slugs_centralized	slugs_centralized	shields/general_shield	0.05
IndivQLearningSlugs/78_7_8	slugs_decentralized	shields/general_shield	True	-10	True	GridWorld	ISR	FullObsDiscrete	Individual_Q	1.0	0.05	2500000	8	True	IndivQLearningSlugs/78_7_8_slugs_decentralized	slugs_decentralized	shields/general_shield	0.05
IndivQLearningSlugs/78_7_8	slugs_decentralized	shields/general_shield	True	-10	True	GridWorld	ISR	FullObsDiscrete	Individual_Q	1.0	0.05	2500000	8	True	IndivQLearningSlugs/78_7_8_none	none		0.05
IndivQLearningSlugs/79_7_9	slugs_decentralized	shields/general_shield	True	-10	True	GridWorld	ISR	FullObsDiscrete	Individual_Q	1.0	0.05	2500000	9	True	IndivQLearningSlugs/79_7_9_slugs_centralized	slugs_centralized	shields/general_shield	0.05
IndivQLearningSlugs/79_7_9	slugs_decentralized	shields/general_shield	True	-10	True	GridWorld	ISR	FullObsDiscrete	Individual_Q	1.0	0.05	2500000	9	True	IndivQLearningSlugs/79_7_9_slugs_decentralized	slugs_decentralized	shields/general_shield	0.05
IndivQLearningSlugs/79_7_9	slugs_decentralized	shields/general_shield	True	-10	True	GridWorld	ISR	FullObsDiscrete	Individual_Q	1.0	0.05	2500000	9	True	IndivQLearningSlugs/79_7_9_none	none		0.05
IndivQLearningSlugs/80_8_0	none		True	-10	True	GridWorld	ISR	FullObsDiscrete	Individual_Q	1.0	0.05	2500000	0	True	IndivQLearningSlugs/80_8_0_slugs_centralized	slugs_centralized	shields/general_shield	0.05
IndivQLearningSlugs/80_8_0	none		True	-10	True	GridWorld	ISR	FullObsDiscrete	Individual_Q	1.0	0.05	2500000	0	True	IndivQLearningSlugs/80_8_0_slugs_decentralized	slugs_decentralized	shields/general_shield	0.05
IndivQLearningSlugs/80_8_0	none		True	-10	True	GridWorld	ISR	FullObsDiscrete	Individual_Q	1.0	0.05	2500000	0	True	IndivQLearningSlugs/80_8_0_none	none		0.05
IndivQLearningSlugs/81_8_1	none		True	-10	True	GridWorld	ISR	FullObsDiscrete	Individual_Q	1.0	0.05	2500000	1	True	IndivQLearningSlugs/81_8_1_slugs_centralized	slugs_centralized	shields/general_shield	0.05
IndivQLearningSlugs/81_8_1	none		True	-10	True	GridWorld	ISR	FullObsDiscrete	Individual_Q	1.0	0.05	2500000	1	True	IndivQLearningSlugs/81_8_1_slugs_decentralized	slugs_decentralized	shields/general_shield	0.05
IndivQLearningSlugs/81_8_1	none		True	-10	True	GridWorld	ISR	FullObsDiscrete	Individual_Q	1.0	0.05	2500000	1	True	IndivQLearningSlugs/81_8_1_none	none		0.05
IndivQLearningSlugs/82_8_2	none		True	-10	True	GridWorld	ISR	FullObsDiscrete	Individual_Q	1.0	0.05	2500000	2	True	IndivQLearningSlugs/82_8_2_slugs_centralized	slugs_centralized	shields/general_shield	0.05
IndivQLearningSlugs/82_8_2	none		True	-10	True	GridWorld	ISR	FullObsDiscrete	Individual_Q	1.0	0.05	2500000	2	True	IndivQLearningSlugs/82_8_2_slugs_decentralized	slugs_decentralized	shields/general_shield	0.05
IndivQLearningSlugs/82_8_2	none		True	-10	True	GridWorld	ISR	FullObsDiscrete	Individual_Q	1.0	0.05	2500000	2	True	IndivQLearningSlugs/82_8_2_none	none		0.05
IndivQLearningSlugs/83_8_3	none		True	-10	True	GridWorld	ISR	FullObsDiscrete	Individual_Q	1.0	0.05	2500000	3	True	IndivQLearningSlugs/83_8_3_slugs_centralized	slugs_centralized	shields/general_shield	0.05
IndivQLearningSlugs/83_8_3	none		True	-10	True	GridWorld	ISR	FullObsDiscrete	Individual_Q	1.0	0.05	2500000	3	True	IndivQLearningSlugs/83_8_3_slugs_decentralized	slugs_decentralized	shields/general_shield	0.05
IndivQLearningSlugs/83_8_3	none		True	-10	True	GridWorld	ISR	FullObsDiscrete	Individual_Q	1.0	0.05	2500000	3	True	IndivQLearningSlugs/83_8_3_none	none		0.05
IndivQLearningSlugs/84_8_4	none		True	-10	True	GridWorld	ISR	FullObsDiscrete	Individual_Q	1.0	0.05	2500000	4	True	IndivQLearningSlugs/84_8_4_slugs_centralized	slugs_centralized	shields/general_shield	0.05
IndivQLearningSlugs/84_8_4	none		True	-10	True	GridWorld	ISR	FullObsDiscrete	Individual_Q	1.0	0.05	2500000	4	True	IndivQLearningSlugs/84_8_4_slugs_decentralized	slugs_decentralized	shields/general_shield	0.05
IndivQLearningSlugs/84_8_4	none		True	-10	True	GridWorld	ISR	FullObsDiscrete	Individual_Q	1.0	0.05	2500000	4	True	IndivQLearningSlugs/84_8_4_none	none		0.05
IndivQLearningSlugs/85_8_5	none		True	-10	True	GridWorld	ISR	FullObsDiscrete	Individual_Q	1.0	0.05	2500000	5	True	IndivQLearningSlugs/85_8_5_slugs_centralized	slugs_centralized	shields/general_shield	0.05
IndivQLearningSlugs/85_8_5	none		True	-10	True	GridWorld	ISR	FullObsDiscrete	Individual_Q	1.0	0.05	2500000	5	True	IndivQLearningSlugs/85_8_5_slugs_decentralized	slugs_decentralized	shields/general_shield	0.05
IndivQLearningSlugs/85_8_5	none		True	-10	True	GridWorld	ISR	FullObsDiscrete	Individual_Q	1.0	0.05	2500000	5	True	IndivQLearningSlugs/85_8_5_none	none		0.05
IndivQLearningSlugs/86_8_6	none		True	-10	True	GridWorld	ISR	FullObsDiscrete	Individual_Q	1.0	0.05	2500000	6	True	IndivQLearningSlugs/86_8_6_slugs_centralized	slugs_centralized	shields/general_shield	0.05
IndivQLearningSlugs/86_8_6	none		True	-10	True	GridWorld	ISR	FullObsDiscrete	Individual_Q	1.0	0.05	2500000	6	True	IndivQLearningSlugs/86_8_6_slugs_decentralized	slugs_decentralized	shields/general_shield	0.05
IndivQLearningSlugs/86_8_6	none		True	-10	True	GridWorld	ISR	FullObsDiscrete	Individual_Q	1.0	0.05	2500000	6	True	IndivQLearningSlugs/86_8_6_none	none		0.05
IndivQLearningSlugs/87_8_7	none		True	-10	True	GridWorld	ISR	FullObsDiscrete	Individual_Q	1.0	0.05	2500000	7	True	IndivQLearningSlugs/87_8_7_slugs_centralized	slugs_centralized	shields/general_shield	0.05
IndivQLearningSlugs/87_8_7	none		True	-10	True	GridWorld	ISR	FullObsDiscrete	Individual_Q	1.0	0.05	2500000	7	True	IndivQLearningSlugs/87_8_7_slugs_decentralized	slugs_decentralized	shields/general_shield	0.05
IndivQLearningSlugs/87_8_7	none		True	-10	True	GridWorld	ISR	FullObsDiscrete	Individual_Q	1.0	0.05	2500000	7	True	IndivQLearningSlugs/87_8_7_none	none		0.05
IndivQLearningSlugs/88_8_8	none		True	-10	True	GridWorld	ISR	FullObsDiscrete	Individual_Q	1.0	0.05	2500000	8	True	IndivQLearningSlugs/88_8_8_slugs_centralized	slugs_centralized	shields/general_shield	0.05
IndivQLearningSlugs/88_8_8	none		True	-10	True	GridWorld	ISR	FullObsDiscrete	Individual_Q	1.0	0.05	2500000	8	True	IndivQLearningSlugs/88_8_8_slugs_decentralized	slugs_decentralized	shields/general_shield	0.05
IndivQLearningSlugs/88_8_8	none		True	-10	True	GridWorld	ISR	FullObsDiscrete	Individual_Q	1.0	0.05	2500000	8	True	IndivQLearningSlugs/88_8_8_none	none		0.05
IndivQLearningSlugs/89_8_9	none		True	-10	True	GridWorld	ISR	FullObsDiscrete	Individual_Q	1.0	0.05	2500000	9	True	IndivQLearningSlugs/89_8_9_slugs_centralized	slugs_centralized	shields/general_shield	0.05
IndivQLearningSlugs/89_8_9	none		True	-10	True	GridWorld	ISR	FullObsDiscrete	Individual_Q	1.0	0.05	2500000	9	True	IndivQLearningSlugs/89_8_9_slugs_decentralized	slugs_decentralized	shields/general_shield	0.05
IndivQLearningSlugs/89_8_9	none		True	-10	True	GridWorld	ISR	FullObsDiscrete	Individual_Q	1.0	0.05	2500000	9	True	IndivQLearningSlugs/89_8_9_none	none		0.05
IndivQLearningSlugs/90_9_0	slugs_centralized	shields/general_shield	True	-10	False	GridWorld	ISR	FullObsDiscrete	Individual_Q	1.0	0.05	2500000	0	True	IndivQLearningSlugs/90_9_0_slugs_centralized	slugs_centralized	shields/general_shield	0.05
IndivQLearningSlugs/90_9_0	slugs_centralized	shields/general_shield	True	-10	False	GridWorld	ISR	FullObsDiscrete	Individual_Q	1.0	0.05	2500000	0	True	IndivQLearningSlugs/90_9_0_slugs_decentralized	slugs_decentralized	shields/general_shield	0.05
IndivQLearningSlugs/90_9_0	slugs_centralized	shields/general_shield	True	-10	False	GridWorld	ISR	FullObsDiscrete	Individual_Q	1.0	0.05	2500000	0	True	IndivQLearningSlugs/90_9_0_none	none		0.05
IndivQLearningSlugs/91_9_1	slugs_centralized	shields/general_shield	True	-10	False	GridWorld	ISR	FullObsDiscrete	Individual_Q	1.0	0.05	2500000	1	True	IndivQLearningSlugs/91_9_1_slugs_centralized	slugs_centralized	shields/general_shield	0.05
IndivQLearningSlugs/91_9_1	slugs_centralized	shields/general_shield	True	-10	False	GridWorld	ISR	FullObsDiscrete	Individual_Q	1.0	0.05	2500000	1	True	IndivQLearningSlugs/91_9_1_slugs_decentralized	slugs_decentralized	shields/general_shield	0.05
IndivQLearningSlugs/91_9_1	slugs_centralized	shields/general_shield	True	-10	False	GridWorld	ISR	FullObsDiscrete	Individual_Q	1.0	0.05	2500000	1	True	IndivQLearningSlugs/91_9_1_none	none		0.05
IndivQLearningSlugs/92_9_2	slugs_centralized	shields/general_shield	True	-10	False	GridWorld	ISR	FullObsDiscrete	Individual_Q	1.0	0.05	2500000	2	True	IndivQLearningSlugs/92_9_2_slugs_centralized	slugs_centralized	shields/general_shield	0.05
IndivQLearningSlugs/92_9_2	slugs_centralized	shields/general_shield	True	-10	False	GridWorld	ISR	FullObsDiscrete	Individual_Q	1.0	0.05	2500000	2	True	IndivQLearningSlugs/92_9_2_slugs_decentralized	slugs_decentralized	shields/general_shield	0.05
IndivQLearningSlugs/92_9_2	slugs_centralized	shields/general_shield	True	-10	False	GridWorld	ISR	FullObsDiscrete	Individual_Q	1.0	0.05	2500000	2	True	IndivQLearningSlugs/92_9_2_none	none		0.05
IndivQLearningSlugs/93_9_3	slugs_centralized	shields/general_shield	True	-10	False	GridWorld	ISR	FullObsDiscrete	Individual_Q	1.0	0.05	2500000	3	True	IndivQLearningSlugs/93_9_3_slugs_centralized	slugs_centralized	shields/general_shield	0.05
IndivQLearningSlugs/93_9_3	slugs_centralized	shields/general_shield	True	-10	False	GridWorld	ISR	FullObsDiscrete	Individual_Q	1.0	0.05	2500000	3	True	IndivQLearningSlugs/93_9_3_slugs_decentralized	slugs_decentralized	shields/general_shield	0.05
IndivQLearningSlugs/93_9_3	slugs_centralized	shields/general_shield	True	-10	False	GridWorld	ISR	FullObsDiscrete	Individual_Q	1.0	0.05	2500000	3	True	IndivQLearningSlugs/93_9_3_none	none		0.05
IndivQLearningSlugs/94_9_4	slugs_centralized	shields/general_shield	True	-10	False	GridWorld	ISR	FullObsDiscrete	Individual_Q	1.0	0.05	2500000	4	True	IndivQLearningSlugs/94_9_4_slugs_centralized	slugs_centralized	shields/general_shield	0.05
IndivQLearningSlugs/94_9_4	slugs_centralized	shields/general_shield	True	-10	False	GridWorld	ISR	FullObsDiscrete	Individual_Q	1.0	0.05	2500000	4	True	IndivQLearningSlugs/94_9_4_slugs_decentralized	slugs_decentralized	shields/general_shield	0.05
IndivQLearningSlugs/94_9_4	slugs_centralized	shields/general_shield	True	-10	False	GridWorld	ISR	FullObsDiscrete	Individual_Q	1.0	0.05	2500000	4	True	IndivQLearningSlugs/94_9_4_none	none		0.05
IndivQLearningSlugs/95_9_5	slugs_centralized	shields/general_shield	True	-10	False	GridWorld	ISR	FullObsDiscrete	Individual_Q	1.0	0.05	2500000	5	True	IndivQLearningSlugs/95_9_5_slugs_centralized	slugs_centralized	shields/general_shield	0.05
IndivQLearningSlugs/95_9_5	slugs_centralized	shields/general_shield	True	-10	False	GridWorld	ISR	FullObsDiscrete	Individual_Q	1.0	0.05	2500000	5	True	IndivQLearningSlugs/95_9_5_slugs_decentralized	slugs_decentralized	shields/general_shield	0.05
IndivQLearningSlugs/95_9_5	slugs_centralized	shields/general_shield	True	-10	False	GridWorld	ISR	FullObsDiscrete	Individual_Q	1.0	0.05	2500000	5	True	IndivQLearningSlugs/95_9_5_none	none		0.05
IndivQLearningSlugs/96_9_6	slugs_centralized	shields/general_shield	True	-10	False	GridWorld	ISR	FullObsDiscrete	Individual_Q	1.0	0.05	2500000	6	True	IndivQLearningSlugs/96_9_6_slugs_centralized	slugs_centralized	shields/general_shield	0.05
IndivQLearningSlugs/96_9_6	slugs_centralized	shields/general_shield	True	-10	False	GridWorld	ISR	FullObsDiscrete	Individual_Q	1.0	0.05	2500000	6	True	IndivQLearningSlugs/96_9_6_slugs_decentralized	slugs_decentralized	shields/general_shield	0.05
IndivQLearningSlugs/96_9_6	slugs_centralized	shields/general_shield	True	-10	False	GridWorld	ISR	FullObsDiscrete	Individual_Q	1.0	0.05	2500000	6	True	IndivQLearningSlugs/96_9_6_none	none		0.05
IndivQLearningSlugs/97_9_7	slugs_centralized	shields/general_shield	True	-10	False	GridWorld	ISR	FullObsDiscrete	Individual_Q	1.0	0.05	2500000	7	True	IndivQLearningSlugs/97_9_7_slugs_centralized	slugs_centralized	shields/general_shield	0.05
IndivQLearningSlugs/97_9_7	slugs_centralized	shields/general_shield	True	-10	False	GridWorld	ISR	FullObsDiscrete	Individual_Q	1.0	0.05	2500000	7	True	IndivQLearningSlugs/97_9_7_slugs_decentralized	slugs_decentralized	shields/general_shield	0.05
IndivQLearningSlugs/97_9_7	slugs_centralized	shields/general_shield	True	-10	False	GridWorld	ISR	FullObsDiscrete	Individual_Q	1.0	0.05	2500000	7	True	IndivQLearningSlugs/97_9_7_none	none		0.05
IndivQLearningSlugs/98_9_8	slugs_centralized	shields/general_shield	True	-10	False	GridWorld	ISR	FullObsDiscrete	Individual_Q	1.0	0.05	2500000	8	True	IndivQLearningSlugs/98_9_8_slugs_centralized	slugs_centralized	shields/general_shield	0.05
IndivQLearningSlugs/98_9_8	slugs_centralized	shields/general_shield	True	-10	False	GridWorld	ISR	FullObsDiscrete	Individual_Q	1.0	0.05	2500000	8	True	IndivQLearningSlugs/98_9_8_slugs_decentralized	slugs_decentralized	shields/general_shield	0.05
IndivQLearningSlugs/98_9_8	slugs_centralized	shields/general_shield	True	-10	False	GridWorld	ISR	FullObsDiscrete	Individual_Q	1.0	0.05	2500000	8	True	IndivQLearningSlugs/98_9_8_none	none		0.05
IndivQLearningSlugs/99_9_9	slugs_centralized	shields/general_shield	True	-10	False	GridWorld	ISR	FullObsDiscrete	Individual_Q	1.0	0.05	2500000	9	True	IndivQLearningSlugs/99_9_9_slugs_centralized	slugs_centralized	shields/general_shield	0.05
IndivQLearningSlugs/99_9_9	slugs_centralized	shields/general_shield	True	-10	False	GridWorld	ISR	FullObsDiscrete	Individual_Q	1.0	0.05	2500000	9	True	IndivQLearningSlugs/99_9_9_slugs_decentralized	slugs_decentralized	shields/general_shield	0.05
IndivQLearningSlugs/99_9_9	slugs_centralized	shields/general_shield	True	-10	False	GridWorld	ISR	FullObsDiscrete	Individual_Q	1.0	0.05	2500000	9	True	IndivQLearningSlugs/99_9_9_none	none		0.05
IndivQLearningSlugs/100_10_0	slugs_decentralized	shields/general_shield	True	-10	False	GridWorld	ISR	FullObsDiscrete	Individual_Q	1.0	0.05	2500000	0	True	IndivQLearningSlugs/100_10_0_slugs_centralized	slugs_centralized	shields/general_shield	0.05
IndivQLearningSlugs/100_10_0	slugs_decentralized	shields/general_shield	True	-10	False	GridWorld	ISR	FullObsDiscrete	Individual_Q	1.0	0.05	2500000	0	True	IndivQLearningSlugs/100_10_0_slugs_decentralized	slugs_decentralized	shields/general_shield	0.05
IndivQLearningSlugs/100_10_0	slugs_decentralized	shields/general_shield	True	-10	False	GridWorld	ISR	FullObsDiscrete	Individual_Q	1.0	0.05	2500000	0	True	IndivQLearningSlugs/100_10_0_none	none		0.05
IndivQLearningSlugs/101_10_1	slugs_decentralized	shields/general_shield	True	-10	False	GridWorld	ISR	FullObsDiscrete	Individual_Q	1.0	0.05	2500000	1	True	IndivQLearningSlugs/101_10_1_slugs_centralized	slugs_centralized	shields/general_shield	0.05
IndivQLearningSlugs/101_10_1	slugs_decentralized	shields/general_shield	True	-10	False	GridWorld	ISR	FullObsDiscrete	Individual_Q	1.0	0.05	2500000	1	True	IndivQLearningSlugs/101_10_1_slugs_decentralized	slugs_decentralized	shields/general_shield	0.05
IndivQLearningSlugs/101_10_1	slugs_decentralized	shields/general_shield	True	-10	False	GridWorld	ISR	FullObsDiscrete	Individual_Q	1.0	0.05	2500000	1	True	IndivQLearningSlugs/101_10_1_none	none		0.05
IndivQLearningSlugs/102_10_2	slugs_decentralized	shields/general_shield	True	-10	False	GridWorld	ISR	FullObsDiscrete	Individual_Q	1.0	0.05	2500000	2	True	IndivQLearningSlugs/102_10_2_slugs_centralized	slugs_centralized	shields/general_shield	0.05
IndivQLearningSlugs/102_10_2	slugs_decentralized	shields/general_shield	True	-10	False	GridWorld	ISR	FullObsDiscrete	Individual_Q	1.0	0.05	2500000	2	True	IndivQLearningSlugs/102_10_2_slugs_decentralized	slugs_decentralized	shields/general_shield	0.05
IndivQLearningSlugs/102_10_2	slugs_decentralized	shields/general_shield	True	-10	False	GridWorld	ISR	FullObsDiscrete	Individual_Q	1.0	0.05	2500000	2	True	IndivQLearningSlugs/102_10_2_none	none		0.05
IndivQLearningSlugs/103_10_3	slugs_decentralized	shields/general_shield	True	-10	False	GridWorld	ISR	FullObsDiscrete	Individual_Q	1.0	0.05	2500000	3	True	IndivQLearningSlugs/103_10_3_slugs_centralized	slugs_centralized	shields/general_shield	0.05
IndivQLearningSlugs/103_10_3	slugs_decentralized	shields/general_shield	True	-10	False	GridWorld	ISR	FullObsDiscrete	Individual_Q	1.0	0.05	2500000	3	True	IndivQLearningSlugs/103_10_3_slugs_decentralized	slugs_decentralized	shields/general_shield	0.05
IndivQLearningSlugs/103_10_3	slugs_decentralized	shields/general_shield	True	-10	False	GridWorld	ISR	FullObsDiscrete	Individual_Q	1.0	0.05	2500000	3	True	IndivQLearningSlugs/103_10_3_none	none		0.05
IndivQLearningSlugs/104_10_4	slugs_decentralized	shields/general_shield	True	-10	False	GridWorld	ISR	FullObsDiscrete	Individual_Q	1.0	0.05	2500000	4	True	IndivQLearningSlugs/104_10_4_slugs_centralized	slugs_centralized	shields/general_shield	0.05
IndivQLearningSlugs/104_10_4	slugs_decentralized	shields/general_shield	True	-10	False	GridWorld	ISR	FullObsDiscrete	Individual_Q	1.0	0.05	2500000	4	True	IndivQLearningSlugs/104_10_4_slugs_decentralized	slugs_decentralized	shields/general_shield	0.05
IndivQLearningSlugs/104_10_4	slugs_decentralized	shields/general_shield	True	-10	False	GridWorld	ISR	FullObsDiscrete	Individual_Q	1.0	0.05	2500000	4	True	IndivQLearningSlugs/104_10_4_none	none		0.05
IndivQLearningSlugs/105_10_5	slugs_decentralized	shields/general_shield	True	-10	False	GridWorld	ISR	FullObsDiscrete	Individual_Q	1.0	0.05	2500000	5	True	IndivQLearningSlugs/105_10_5_slugs_centralized	slugs_centralized	shields/general_shield	0.05
IndivQLearningSlugs/105_10_5	slugs_decentralized	shields/general_shield	True	-10	False	GridWorld	ISR	FullObsDiscrete	Individual_Q	1.0	0.05	2500000	5	True	IndivQLearningSlugs/105_10_5_slugs_decentralized	slugs_decentralized	shields/general_shield	0.05
IndivQLearningSlugs/105_10_5	slugs_decentralized	shields/general_shield	True	-10	False	GridWorld	ISR	FullObsDiscrete	Individual_Q	1.0	0.05	2500000	5	True	IndivQLearningSlugs/105_10_5_none	none		0.05
IndivQLearningSlugs/106_10_6	slugs_decentralized	shields/general_shield	True	-10	False	GridWorld	ISR	FullObsDiscrete	Individual_Q	1.0	0.05	2500000	6	True	IndivQLearningSlugs/106_10_6_slugs_centralized	slugs_centralized	shields/general_shield	0.05
IndivQLearningSlugs/106_10_6	slugs_decentralized	shields/general_shield	True	-10	False	GridWorld	ISR	FullObsDiscrete	Individual_Q	1.0	0.05	2500000	6	True	IndivQLearningSlugs/106_10_6_slugs_decentralized	slugs_decentralized	shields/general_shield	0.05
IndivQLearningSlugs/106_10_6	slugs_decentralized	shields/general_shield	True	-10	False	GridWorld	ISR	FullObsDiscrete	Individual_Q	1.0	0.05	2500000	6	True	IndivQLearningSlugs/106_10_6_none	none		0.05
IndivQLearningSlugs/107_10_7	slugs_decentralized	shields/general_shield	True	-10	False	GridWorld	ISR	FullObsDiscrete	Individual_Q	1.0	0.05	2500000	7	True	IndivQLearningSlugs/107_10_7_slugs_centralized	slugs_centralized	shields/general_shield	0.05
IndivQLearningSlugs/107_10_7	slugs_decentralized	shields/general_shield	True	-10	False	GridWorld	ISR	FullObsDiscrete	Individual_Q	1.0	0.05	2500000	7	True	IndivQLearningSlugs/107_10_7_slugs_decentralized	slugs_decentralized	shields/general_shield	0.05
IndivQLearningSlugs/107_10_7	slugs_decentralized	shields/general_shield	True	-10	False	GridWorld	ISR	FullObsDiscrete	Individual_Q	1.0	0.05	2500000	7	True	IndivQLearningSlugs/107_10_7_none	none		0.05
IndivQLearningSlugs/108_10_8	slugs_decentralized	shields/general_shield	True	-10	False	GridWorld	ISR	FullObsDiscrete	Individual_Q	1.0	0.05	2500000	8	True	IndivQLearningSlugs/108_10_8_slugs_centralized	slugs_centralized	shields/general_shield	0.05
IndivQLearningSlugs/108_10_8	slugs_decentralized	shields/general_shield	True	-10	False	GridWorld	ISR	FullObsDiscrete	Individual_Q	1.0	0.05	2500000	8	True	IndivQLearningSlugs/108_10_8_slugs_decentralized	slugs_decentralized	shields/general_shield	0.05
IndivQLearningSlugs/108_10_8	slugs_decentralized	shields/general_shield	True	-10	False	GridWorld	ISR	FullObsDiscrete	Individual_Q	1.0	0.05	2500000	8	True	IndivQLearningSlugs/108_10_8_none	none		0.05
IndivQLearningSlugs/109_10_9	slugs_decentralized	shields/general_shield	True	-10	False	GridWorld	ISR	FullObsDiscrete	Individual_Q	1.0	0.05	2500000	9	True	IndivQLearningSlugs/109_10_9_slugs_centralized	slugs_centralized	shields/general_shield	0.05
IndivQLearningSlugs/109_10_9	slugs_decentralized	shields/general_shield	True	-10	False	GridWorld	ISR	FullObsDiscrete	Individual_Q	1.0	0.05	2500000	9	True	IndivQLearningSlugs/109_10_9_slugs_decentralized	slugs_decentralized	shields/general_shield	0.05
IndivQLearningSlugs/109_10_9	slugs_decentralized	shields/general_shield	True	-10	False	GridWorld	ISR	FullObsDiscrete	Individual_Q	1.0	0.05	2500000	9	True	IndivQLearningSlugs/109_10_9_none	none		0.05
IndivQLearningSlugs/110_11_0	none		True	-10	False	GridWorld	ISR	FullObsDiscrete	Individual_Q	1.0	0.05	2500000	0	True	IndivQLearningSlugs/110_11_0_slugs_centralized	slugs_centralized	shields/general_shield	0.05
IndivQLearningSlugs/110_11_0	none		True	-10	False	GridWorld	ISR	FullObsDiscrete	Individual_Q	1.0	0.05	2500000	0	True	IndivQLearningSlugs/110_11_0_slugs_decentralized	slugs_decentralized	shields/general_shield	0.05
IndivQLearningSlugs/110_11_0	none		True	-10	False	GridWorld	ISR	FullObsDiscrete	Individual_Q	1.0	0.05	2500000	0	True	IndivQLearningSlugs/110_11_0_none	none		0.05
IndivQLearningSlugs/111_11_1	none		True	-10	False	GridWorld	ISR	FullObsDiscrete	Individual_Q	1.0	0.05	2500000	1	True	IndivQLearningSlugs/111_11_1_slugs_centralized	slugs_centralized	shields/general_shield	0.05
IndivQLearningSlugs/111_11_1	none		True	-10	False	GridWorld	ISR	FullObsDiscrete	Individual_Q	1.0	0.05	2500000	1	True	IndivQLearningSlugs/111_11_1_slugs_decentralized	slugs_decentralized	shields/general_shield	0.05
IndivQLearningSlugs/111_11_1	none		True	-10	False	GridWorld	ISR	FullObsDiscrete	Individual_Q	1.0	0.05	2500000	1	True	IndivQLearningSlugs/111_11_1_none	none		0.05
IndivQLearningSlugs/112_11_2	none		True	-10	False	GridWorld	ISR	FullObsDiscrete	Individual_Q	1.0	0.05	2500000	2	True	IndivQLearningSlugs/112_11_2_slugs_centralized	slugs_centralized	shields/general_shield	0.05
IndivQLearningSlugs/112_11_2	none		True	-10	False	GridWorld	ISR	FullObsDiscrete	Individual_Q	1.0	0.05	2500000	2	True	IndivQLearningSlugs/112_11_2_slugs_decentralized	slugs_decentralized	shields/general_shield	0.05
IndivQLearningSlugs/112_11_2	none		True	-10	False	GridWorld	ISR	FullObsDiscrete	Individual_Q	1.0	0.05	2500000	2	True	IndivQLearningSlugs/112_11_2_none	none		0.05
IndivQLearningSlugs/113_11_3	none		True	-10	False	GridWorld	ISR	FullObsDiscrete	Individual_Q	1.0	0.05	2500000	3	True	IndivQLearningSlugs/113_11_3_slugs_centralized	slugs_centralized	shields/general_shield	0.05
IndivQLearningSlugs/113_11_3	none		True	-10	False	GridWorld	ISR	FullObsDiscrete	Individual_Q	1.0	0.05	2500000	3	True	IndivQLearningSlugs/113_11_3_slugs_decentralized	slugs_decentralized	shields/general_shield	0.05
IndivQLearningSlugs/113_11_3	none		True	-10	False	GridWorld	ISR	FullObsDiscrete	Individual_Q	1.0	0.05	2500000	3	True	IndivQLearningSlugs/113_11_3_none	none		0.05
IndivQLearningSlugs/114_11_4	none		True	-10	False	GridWorld	ISR	FullObsDiscrete	Individual_Q	1.0	0.05	2500000	4	True	IndivQLearningSlugs/114_11_4_slugs_centralized	slugs_centralized	shields/general_shield	0.05
IndivQLearningSlugs/114_11_4	none		True	-10	False	GridWorld	ISR	FullObsDiscrete	Individual_Q	1.0	0.05	2500000	4	True	IndivQLearningSlugs/114_11_4_slugs_decentralized	slugs_decentralized	shields/general_shield	0.05
IndivQLearningSlugs/114_11_4	none		True	-10	False	GridWorld	ISR	FullObsDiscrete	Individual_Q	1.0	0.05	2500000	4	True	IndivQLearningSlugs/114_11_4_none	none		0.05
IndivQLearningSlugs/115_11_5	none		True	-10	False	GridWorld	ISR	FullObsDiscrete	Individual_Q	1.0	0.05	2500000	5	True	IndivQLearningSlugs/115_11_5_slugs_centralized	slugs_centralized	shields/general_shield	0.05
IndivQLearningSlugs/115_11_5	none		True	-10	False	GridWorld	ISR	FullObsDiscrete	Individual_Q	1.0	0.05	2500000	5	True	IndivQLearningSlugs/115_11_5_slugs_decentralized	slugs_decentralized	shields/general_shield	0.05
IndivQLearningSlugs/115_11_5	none		True	-10	False	GridWorld	ISR	FullObsDiscrete	Individual_Q	1.0	0.05	2500000	5	True	IndivQLearningSlugs/115_11_5_none	none		0.05
IndivQLearningSlugs/116_11_6	none		True	-10	False	GridWorld	ISR	FullObsDiscrete	Individual_Q	1.0	0.05	2500000	6	True	IndivQLearningSlugs/116_11_6_slugs_centralized	slugs_centralized	shields/general_shield	0.05
IndivQLearningSlugs/116_11_6	none		True	-10	False	GridWorld	ISR	FullObsDiscrete	Individual_Q	1.0	0.05	2500000	6	True	IndivQLearningSlugs/116_11_6_slugs_decentralized	slugs_decentralized	shields/general_shield	0.05
IndivQLearningSlugs/116_11_6	none		True	-10	False	GridWorld	ISR	FullObsDiscrete	Individual_Q	1.0	0.05	2500000	6	True	IndivQLearningSlugs/116_11_6_none	none		0.05
IndivQLearningSlugs/117_11_7	none		True	-10	False	GridWorld	ISR	FullObsDiscrete	Individual_Q	1.0	0.05	2500000	7	True	IndivQLearningSlugs/117_11_7_slugs_centralized	slugs_centralized	shields/general_shield	0.05
IndivQLearningSlugs/117_11_7	none		True	-10	False	GridWorld	ISR	FullObsDiscrete	Individual_Q	1.0	0.05	2500000	7	True	IndivQLearningSlugs/117_11_7_slugs_decentralized	slugs_decentralized	shields/general_shield	0.05
IndivQLearningSlugs/117_11_7	none		True	-10	False	GridWorld	ISR	FullObsDiscrete	Individual_Q	1.0	0.05	2500000	7	True	IndivQLearningSlugs/117_11_7_none	none		0.05
IndivQLearningSlugs/118_11_8	none		True	-10	False	GridWorld	ISR	FullObsDiscrete	Individual_Q	1.0	0.05	2500000	8	True	IndivQLearningSlugs/118_11_8_slugs_centralized	slugs_centralized	shields/general_shield	0.05
IndivQLearningSlugs/118_11_8	none		True	-10	False	GridWorld	ISR	FullObsDiscrete	Individual_Q	1.0	0.05	2500000	8	True	IndivQLearningSlugs/118_11_8_slugs_decentralized	slugs_decentralized	shields/general_shield	0.05
IndivQLearningSlugs/118_11_8	none		True	-10	False	GridWorld	ISR	FullObsDiscrete	Individual_Q	1.0	0.05	2500000	8	True	IndivQLearningSlugs/118_11_8_none	none		0.05
IndivQLearningSlugs/119_11_9	none		True	-10	False	GridWorld	ISR	FullObsDiscrete	Individual_Q	1.0	0.05	2500000	9	True	IndivQLearningSlugs/119_11_9_slugs_centralized	slugs_centralized	shields/general_shield	0.05
IndivQLearningSlugs/119_11_9	none		True	-10	False	GridWorld	ISR	FullObsDiscrete	Individual_Q	1.0	0.05	2500000	9	True	IndivQLearningSlugs/119_11_9_slugs_decentralized	slugs_decentralized	shields/general_shield	0.05
IndivQLearningSlugs/119_11_9	none		True	-10	False	GridWorld	ISR	FullObsDiscrete	Individual_Q	1.0	0.05	2500000	9	True	IndivQLearningSlugs/119_11_9_none	none		0.05
IndivQLearningSlugs/120_12_0	slugs_centralized	shields/general_shield	True	-10	True	GridWorld	MIT	FullObsDiscrete	Individual_Q	1.0	0.05	2500000	0	True	IndivQLearningSlugs/120_12_0_slugs_centralized	slugs_centralized	shields/general_shield	0.05
IndivQLearningSlugs/120_12_0	slugs_centralized	shields/general_shield	True	-10	True	GridWorld	MIT	FullObsDiscrete	Individual_Q	1.0	0.05	2500000	0	True	IndivQLearningSlugs/120_12_0_slugs_decentralized	slugs_decentralized	shields/general_shield	0.05
IndivQLearningSlugs/120_12_0	slugs_centralized	shields/general_shield	True	-10	True	GridWorld	MIT	FullObsDiscrete	Individual_Q	1.0	0.05	2500000	0	True	IndivQLearningSlugs/120_12_0_none	none		0.05
IndivQLearningSlugs/121_12_1	slugs_centralized	shields/general_shield	True	-10	True	GridWorld	MIT	FullObsDiscrete	Individual_Q	1.0	0.05	2500000	1	True	IndivQLearningSlugs/121_12_1_slugs_centralized	slugs_centralized	shields/general_shield	0.05
IndivQLearningSlugs/121_12_1	slugs_centralized	shields/general_shield	True	-10	True	GridWorld	MIT	FullObsDiscrete	Individual_Q	1.0	0.05	2500000	1	True	IndivQLearningSlugs/121_12_1_slugs_decentralized	slugs_decentralized	shields/general_shield	0.05
IndivQLearningSlugs/121_12_1	slugs_centralized	shields/general_shield	True	-10	True	GridWorld	MIT	FullObsDiscrete	Individual_Q	1.0	0.05	2500000	1	True	IndivQLearningSlugs/121_12_1_none	none		0.05
IndivQLearningSlugs/122_12_2	slugs_centralized	shields/general_shield	True	-10	True	GridWorld	MIT	FullObsDiscrete	Individual_Q	1.0	0.05	2500000	2	True	IndivQLearningSlugs/122_12_2_slugs_centralized	slugs_centralized	shields/general_shield	0.05
IndivQLearningSlugs/122_12_2	slugs_centralized	shields/general_shield	True	-10	True	GridWorld	MIT	FullObsDiscrete	Individual_Q	1.0	0.05	2500000	2	True	IndivQLearningSlugs/122_12_2_slugs_decentralized	slugs_decentralized	shields/general_shield	0.05
IndivQLearningSlugs/122_12_2	slugs_centralized	shields/general_shield	True	-10	True	GridWorld	MIT	FullObsDiscrete	Individual_Q	1.0	0.05	2500000	2	True	IndivQLearningSlugs/122_12_2_none	none		0.05
IndivQLearningSlugs/123_12_3	slugs_centralized	shields/general_shield	True	-10	True	GridWorld	MIT	FullObsDiscrete	Individual_Q	1.0	0.05	2500000	3	True	IndivQLearningSlugs/123_12_3_slugs_centralized	slugs_centralized	shields/general_shield	0.05
IndivQLearningSlugs/123_12_3	slugs_centralized	shields/general_shield	True	-10	True	GridWorld	MIT	FullObsDiscrete	Individual_Q	1.0	0.05	2500000	3	True	IndivQLearningSlugs/123_12_3_slugs_decentralized	slugs_decentralized	shields/general_shield	0.05
IndivQLearningSlugs/123_12_3	slugs_centralized	shields/general_shield	True	-10	True	GridWorld	MIT	FullObsDiscrete	Individual_Q	1.0	0.05	2500000	3	True	IndivQLearningSlugs/123_12_3_none	none		0.05
IndivQLearningSlugs/124_12_4	slugs_centralized	shields/general_shield	True	-10	True	GridWorld	MIT	FullObsDiscrete	Individual_Q	1.0	0.05	2500000	4	True	IndivQLearningSlugs/124_12_4_slugs_centralized	slugs_centralized	shields/general_shield	0.05
IndivQLearningSlugs/124_12_4	slugs_centralized	shields/general_shield	True	-10	True	GridWorld	MIT	FullObsDiscrete	Individual_Q	1.0	0.05	2500000	4	True	IndivQLearningSlugs/124_12_4_slugs_decentralized	slugs_decentralized	shields/general_shield	0.05
IndivQLearningSlugs/124_12_4	slugs_centralized	shields/general_shield	True	-10	True	GridWorld	MIT	FullObsDiscrete	Individual_Q	1.0	0.05	2500000	4	True	IndivQLearningSlugs/124_12_4_none	none		0.05
IndivQLearningSlugs/125_12_5	slugs_centralized	shields/general_shield	True	-10	True	GridWorld	MIT	FullObsDiscrete	Individual_Q	1.0	0.05	2500000	5	True	IndivQLearningSlugs/125_12_5_slugs_centralized	slugs_centralized	shields/general_shield	0.05
IndivQLearningSlugs/125_12_5	slugs_centralized	shields/general_shield	True	-10	True	GridWorld	MIT	FullObsDiscrete	Individual_Q	1.0	0.05	2500000	5	True	IndivQLearningSlugs/125_12_5_slugs_decentralized	slugs_decentralized	shields/general_shield	0.05
IndivQLearningSlugs/125_12_5	slugs_centralized	shields/general_shield	True	-10	True	GridWorld	MIT	FullObsDiscrete	Individual_Q	1.0	0.05	2500000	5	True	IndivQLearningSlugs/125_12_5_none	none		0.05
IndivQLearningSlugs/126_12_6	slugs_centralized	shields/general_shield	True	-10	True	GridWorld	MIT	FullObsDiscrete	Individual_Q	1.0	0.05	2500000	6	True	IndivQLearningSlugs/126_12_6_slugs_centralized	slugs_centralized	shields/general_shield	0.05
IndivQLearningSlugs/126_12_6	slugs_centralized	shields/general_shield	True	-10	True	GridWorld	MIT	FullObsDiscrete	Individual_Q	1.0	0.05	2500000	6	True	IndivQLearningSlugs/126_12_6_slugs_decentralized	slugs_decentralized	shields/general_shield	0.05
IndivQLearningSlugs/126_12_6	slugs_centralized	shields/general_shield	True	-10	True	GridWorld	MIT	FullObsDiscrete	Individual_Q	1.0	0.05	2500000	6	True	IndivQLearningSlugs/126_12_6_none	none		0.05
IndivQLearningSlugs/127_12_7	slugs_centralized	shields/general_shield	True	-10	True	GridWorld	MIT	FullObsDiscrete	Individual_Q	1.0	0.05	2500000	7	True	IndivQLearningSlugs/127_12_7_slugs_centralized	slugs_centralized	shields/general_shield	0.05
IndivQLearningSlugs/127_12_7	slugs_centralized	shields/general_shield	True	-10	True	GridWorld	MIT	FullObsDiscrete	Individual_Q	1.0	0.05	2500000	7	True	IndivQLearningSlugs/127_12_7_slugs_decentralized	slugs_decentralized	shields/general_shield	0.05
IndivQLearningSlugs/127_12_7	slugs_centralized	shields/general_shield	True	-10	True	GridWorld	MIT	FullObsDiscrete	Individual_Q	1.0	0.05	2500000	7	True	IndivQLearningSlugs/127_12_7_none	none		0.05
IndivQLearningSlugs/128_12_8	slugs_centralized	shields/general_shield	True	-10	True	GridWorld	MIT	FullObsDiscrete	Individual_Q	1.0	0.05	2500000	8	True	IndivQLearningSlugs/128_12_8_slugs_centralized	slugs_centralized	shields/general_shield	0.05
IndivQLearningSlugs/128_12_8	slugs_centralized	shields/general_shield	True	-10	True	GridWorld	MIT	FullObsDiscrete	Individual_Q	1.0	0.05	2500000	8	True	IndivQLearningSlugs/128_12_8_slugs_decentralized	slugs_decentralized	shields/general_shield	0.05
IndivQLearningSlugs/128_12_8	slugs_centralized	shields/general_shield	True	-10	True	GridWorld	MIT	FullObsDiscrete	Individual_Q	1.0	0.05	2500000	8	True	IndivQLearningSlugs/128_12_8_none	none		0.05
IndivQLearningSlugs/129_12_9	slugs_centralized	shields/general_shield	True	-10	True	GridWorld	MIT	FullObsDiscrete	Individual_Q	1.0	0.05	2500000	9	True	IndivQLearningSlugs/129_12_9_slugs_centralized	slugs_centralized	shields/general_shield	0.05
IndivQLearningSlugs/129_12_9	slugs_centralized	shields/general_shield	True	-10	True	GridWorld	MIT	FullObsDiscrete	Individual_Q	1.0	0.05	2500000	9	True	IndivQLearningSlugs/129_12_9_slugs_decentralized	slugs_decentralized	shields/general_shield	0.05
IndivQLearningSlugs/129_12_9	slugs_centralized	shields/general_shield	True	-10	True	GridWorld	MIT	FullObsDiscrete	Individual_Q	1.0	0.05	2500000	9	True	IndivQLearningSlugs/129_12_9_none	none		0.05
IndivQLearningSlugs/130_13_0	slugs_decentralized	shields/general_shield	True	-10	True	GridWorld	MIT	FullObsDiscrete	Individual_Q	1.0	0.05	2500000	0	True	IndivQLearningSlugs/130_13_0_slugs_centralized	slugs_centralized	shields/general_shield	0.05
IndivQLearningSlugs/130_13_0	slugs_decentralized	shields/general_shield	True	-10	True	GridWorld	MIT	FullObsDiscrete	Individual_Q	1.0	0.05	2500000	0	True	IndivQLearningSlugs/130_13_0_slugs_decentralized	slugs_decentralized	shields/general_shield	0.05
IndivQLearningSlugs/130_13_0	slugs_decentralized	shields/general_shield	True	-10	True	GridWorld	MIT	FullObsDiscrete	Individual_Q	1.0	0.05	2500000	0	True	IndivQLearningSlugs/130_13_0_none	none		0.05
IndivQLearningSlugs/131_13_1	slugs_decentralized	shields/general_shield	True	-10	True	GridWorld	MIT	FullObsDiscrete	Individual_Q	1.0	0.05	2500000	1	True	IndivQLearningSlugs/131_13_1_slugs_centralized	slugs_centralized	shields/general_shield	0.05
IndivQLearningSlugs/131_13_1	slugs_decentralized	shields/general_shield	True	-10	True	GridWorld	MIT	FullObsDiscrete	Individual_Q	1.0	0.05	2500000	1	True	IndivQLearningSlugs/131_13_1_slugs_decentralized	slugs_decentralized	shields/general_shield	0.05
IndivQLearningSlugs/131_13_1	slugs_decentralized	shields/general_shield	True	-10	True	GridWorld	MIT	FullObsDiscrete	Individual_Q	1.0	0.05	2500000	1	True	IndivQLearningSlugs/131_13_1_none	none		0.05
IndivQLearningSlugs/132_13_2	slugs_decentralized	shields/general_shield	True	-10	True	GridWorld	MIT	FullObsDiscrete	Individual_Q	1.0	0.05	2500000	2	True	IndivQLearningSlugs/132_13_2_slugs_centralized	slugs_centralized	shields/general_shield	0.05
IndivQLearningSlugs/132_13_2	slugs_decentralized	shields/general_shield	True	-10	True	GridWorld	MIT	FullObsDiscrete	Individual_Q	1.0	0.05	2500000	2	True	IndivQLearningSlugs/132_13_2_slugs_decentralized	slugs_decentralized	shields/general_shield	0.05
IndivQLearningSlugs/132_13_2	slugs_decentralized	shields/general_shield	True	-10	True	GridWorld	MIT	FullObsDiscrete	Individual_Q	1.0	0.05	2500000	2	True	IndivQLearningSlugs/132_13_2_none	none		0.05
IndivQLearningSlugs/133_13_3	slugs_decentralized	shields/general_shield	True	-10	True	GridWorld	MIT	FullObsDiscrete	Individual_Q	1.0	0.05	2500000	3	True	IndivQLearningSlugs/133_13_3_slugs_centralized	slugs_centralized	shields/general_shield	0.05
IndivQLearningSlugs/133_13_3	slugs_decentralized	shields/general_shield	True	-10	True	GridWorld	MIT	FullObsDiscrete	Individual_Q	1.0	0.05	2500000	3	True	IndivQLearningSlugs/133_13_3_slugs_decentralized	slugs_decentralized	shields/general_shield	0.05
IndivQLearningSlugs/133_13_3	slugs_decentralized	shields/general_shield	True	-10	True	GridWorld	MIT	FullObsDiscrete	Individual_Q	1.0	0.05	2500000	3	True	IndivQLearningSlugs/133_13_3_none	none		0.05
IndivQLearningSlugs/134_13_4	slugs_decentralized	shields/general_shield	True	-10	True	GridWorld	MIT	FullObsDiscrete	Individual_Q	1.0	0.05	2500000	4	True	IndivQLearningSlugs/134_13_4_slugs_centralized	slugs_centralized	shields/general_shield	0.05
IndivQLearningSlugs/134_13_4	slugs_decentralized	shields/general_shield	True	-10	True	GridWorld	MIT	FullObsDiscrete	Individual_Q	1.0	0.05	2500000	4	True	IndivQLearningSlugs/134_13_4_slugs_decentralized	slugs_decentralized	shields/general_shield	0.05
IndivQLearningSlugs/134_13_4	slugs_decentralized	shields/general_shield	True	-10	True	GridWorld	MIT	FullObsDiscrete	Individual_Q	1.0	0.05	2500000	4	True	IndivQLearningSlugs/134_13_4_none	none		0.05
IndivQLearningSlugs/135_13_5	slugs_decentralized	shields/general_shield	True	-10	True	GridWorld	MIT	FullObsDiscrete	Individual_Q	1.0	0.05	2500000	5	True	IndivQLearningSlugs/135_13_5_slugs_centralized	slugs_centralized	shields/general_shield	0.05
IndivQLearningSlugs/135_13_5	slugs_decentralized	shields/general_shield	True	-10	True	GridWorld	MIT	FullObsDiscrete	Individual_Q	1.0	0.05	2500000	5	True	IndivQLearningSlugs/135_13_5_slugs_decentralized	slugs_decentralized	shields/general_shield	0.05
IndivQLearningSlugs/135_13_5	slugs_decentralized	shields/general_shield	True	-10	True	GridWorld	MIT	FullObsDiscrete	Individual_Q	1.0	0.05	2500000	5	True	IndivQLearningSlugs/135_13_5_none	none		0.05
IndivQLearningSlugs/136_13_6	slugs_decentralized	shields/general_shield	True	-10	True	GridWorld	MIT	FullObsDiscrete	Individual_Q	1.0	0.05	2500000	6	True	IndivQLearningSlugs/136_13_6_slugs_centralized	slugs_centralized	shields/general_shield	0.05
IndivQLearningSlugs/136_13_6	slugs_decentralized	shields/general_shield	True	-10	True	GridWorld	MIT	FullObsDiscrete	Individual_Q	1.0	0.05	2500000	6	True	IndivQLearningSlugs/136_13_6_slugs_decentralized	slugs_decentralized	shields/general_shield	0.05
IndivQLearningSlugs/136_13_6	slugs_decentralized	shields/general_shield	True	-10	True	GridWorld	MIT	FullObsDiscrete	Individual_Q	1.0	0.05	2500000	6	True	IndivQLearningSlugs/136_13_6_none	none		0.05
IndivQLearningSlugs/137_13_7	slugs_decentralized	shields/general_shield	True	-10	True	GridWorld	MIT	FullObsDiscrete	Individual_Q	1.0	0.05	2500000	7	True	IndivQLearningSlugs/137_13_7_slugs_centralized	slugs_centralized	shields/general_shield	0.05
IndivQLearningSlugs/137_13_7	slugs_decentralized	shields/general_shield	True	-10	True	GridWorld	MIT	FullObsDiscrete	Individual_Q	1.0	0.05	2500000	7	True	IndivQLearningSlugs/137_13_7_slugs_decentralized	slugs_decentralized	shields/general_shield	0.05
IndivQLearningSlugs/137_13_7	slugs_decentralized	shields/general_shield	True	-10	True	GridWorld	MIT	FullObsDiscrete	Individual_Q	1.0	0.05	2500000	7	True	IndivQLearningSlugs/137_13_7_none	none		0.05
IndivQLearningSlugs/138_13_8	slugs_decentralized	shields/general_shield	True	-10	True	GridWorld	MIT	FullObsDiscrete	Individual_Q	1.0	0.05	2500000	8	True	IndivQLearningSlugs/138_13_8_slugs_centralized	slugs_centralized	shields/general_shield	0.05
IndivQLearningSlugs/138_13_8	slugs_decentralized	shields/general_shield	True	-10	True	GridWorld	MIT	FullObsDiscrete	Individual_Q	1.0	0.05	2500000	8	True	IndivQLearningSlugs/138_13_8_slugs_decentralized	slugs_decentralized	shields/general_shield	0.05
IndivQLearningSlugs/138_13_8	slugs_decentralized	shields/general_shield	True	-10	True	GridWorld	MIT	FullObsDiscrete	Individual_Q	1.0	0.05	2500000	8	True	IndivQLearningSlugs/138_13_8_none	none		0.05
IndivQLearningSlugs/139_13_9	slugs_decentralized	shields/general_shield	True	-10	True	GridWorld	MIT	FullObsDiscrete	Individual_Q	1.0	0.05	2500000	9	True	IndivQLearningSlugs/139_13_9_slugs_centralized	slugs_centralized	shields/general_shield	0.05
IndivQLearningSlugs/139_13_9	slugs_decentralized	shields/general_shield	True	-10	True	GridWorld	MIT	FullObsDiscrete	Individual_Q	1.0	0.05	2500000	9	True	IndivQLearningSlugs/139_13_9_slugs_decentralized	slugs_decentralized	shields/general_shield	0.05
IndivQLearningSlugs/139_13_9	slugs_decentralized	shields/general_shield	True	-10	True	GridWorld	MIT	FullObsDiscrete	Individual_Q	1.0	0.05	2500000	9	True	IndivQLearningSlugs/139_13_9_none	none		0.05
IndivQLearningSlugs/140_14_0	none		True	-10	True	GridWorld	MIT	FullObsDiscrete	Individual_Q	1.0	0.05	2500000	0	True	IndivQLearningSlugs/140_14_0_slugs_centralized	slugs_centralized	shields/general_shield	0.05
IndivQLearningSlugs/140_14_0	none		True	-10	True	GridWorld	MIT	FullObsDiscrete	Individual_Q	1.0	0.05	2500000	0	True	IndivQLearningSlugs/140_14_0_slugs_decentralized	slugs_decentralized	shields/general_shield	0.05
IndivQLearningSlugs/140_14_0	none		True	-10	True	GridWorld	MIT	FullObsDiscrete	Individual_Q	1.0	0.05	2500000	0	True	IndivQLearningSlugs/140_14_0_none	none		0.05
IndivQLearningSlugs/141_14_1	none		True	-10	True	GridWorld	MIT	FullObsDiscrete	Individual_Q	1.0	0.05	2500000	1	True	IndivQLearningSlugs/141_14_1_slugs_centralized	slugs_centralized	shields/general_shield	0.05
IndivQLearningSlugs/141_14_1	none		True	-10	True	GridWorld	MIT	FullObsDiscrete	Individual_Q	1.0	0.05	2500000	1	True	IndivQLearningSlugs/141_14_1_slugs_decentralized	slugs_decentralized	shields/general_shield	0.05
IndivQLearningSlugs/141_14_1	none		True	-10	True	GridWorld	MIT	FullObsDiscrete	Individual_Q	1.0	0.05	2500000	1	True	IndivQLearningSlugs/141_14_1_none	none		0.05
IndivQLearningSlugs/142_14_2	none		True	-10	True	GridWorld	MIT	FullObsDiscrete	Individual_Q	1.0	0.05	2500000	2	True	IndivQLearningSlugs/142_14_2_slugs_centralized	slugs_centralized	shields/general_shield	0.05
IndivQLearningSlugs/142_14_2	none		True	-10	True	GridWorld	MIT	FullObsDiscrete	Individual_Q	1.0	0.05	2500000	2	True	IndivQLearningSlugs/142_14_2_slugs_decentralized	slugs_decentralized	shields/general_shield	0.05
IndivQLearningSlugs/142_14_2	none		True	-10	True	GridWorld	MIT	FullObsDiscrete	Individual_Q	1.0	0.05	2500000	2	True	IndivQLearningSlugs/142_14_2_none	none		0.05
IndivQLearningSlugs/143_14_3	none		True	-10	True	GridWorld	MIT	FullObsDiscrete	Individual_Q	1.0	0.05	2500000	3	True	IndivQLearningSlugs/143_14_3_slugs_centralized	slugs_centralized	shields/general_shield	0.05
IndivQLearningSlugs/143_14_3	none		True	-10	True	GridWorld	MIT	FullObsDiscrete	Individual_Q	1.0	0.05	2500000	3	True	IndivQLearningSlugs/143_14_3_slugs_decentralized	slugs_decentralized	shields/general_shield	0.05
IndivQLearningSlugs/143_14_3	none		True	-10	True	GridWorld	MIT	FullObsDiscrete	Individual_Q	1.0	0.05	2500000	3	True	IndivQLearningSlugs/143_14_3_none	none		0.05
IndivQLearningSlugs/144_14_4	none		True	-10	True	GridWorld	MIT	FullObsDiscrete	Individual_Q	1.0	0.05	2500000	4	True	IndivQLearningSlugs/144_14_4_slugs_centralized	slugs_centralized	shields/general_shield	0.05
IndivQLearningSlugs/144_14_4	none		True	-10	True	GridWorld	MIT	FullObsDiscrete	Individual_Q	1.0	0.05	2500000	4	True	IndivQLearningSlugs/144_14_4_slugs_decentralized	slugs_decentralized	shields/general_shield	0.05
IndivQLearningSlugs/144_14_4	none		True	-10	True	GridWorld	MIT	FullObsDiscrete	Individual_Q	1.0	0.05	2500000	4	True	IndivQLearningSlugs/144_14_4_none	none		0.05
IndivQLearningSlugs/145_14_5	none		True	-10	True	GridWorld	MIT	FullObsDiscrete	Individual_Q	1.0	0.05	2500000	5	True	IndivQLearningSlugs/145_14_5_slugs_centralized	slugs_centralized	shields/general_shield	0.05
IndivQLearningSlugs/145_14_5	none		True	-10	True	GridWorld	MIT	FullObsDiscrete	Individual_Q	1.0	0.05	2500000	5	True	IndivQLearningSlugs/145_14_5_slugs_decentralized	slugs_decentralized	shields/general_shield	0.05
IndivQLearningSlugs/145_14_5	none		True	-10	True	GridWorld	MIT	FullObsDiscrete	Individual_Q	1.0	0.05	2500000	5	True	IndivQLearningSlugs/145_14_5_none	none		0.05
IndivQLearningSlugs/146_14_6	none		True	-10	True	GridWorld	MIT	FullObsDiscrete	Individual_Q	1.0	0.05	2500000	6	True	IndivQLearningSlugs/146_14_6_slugs_centralized	slugs_centralized	shields/general_shield	0.05
IndivQLearningSlugs/146_14_6	none		True	-10	True	GridWorld	MIT	FullObsDiscrete	Individual_Q	1.0	0.05	2500000	6	True	IndivQLearningSlugs/146_14_6_slugs_decentralized	slugs_decentralized	shields/general_shield	0.05
IndivQLearningSlugs/146_14_6	none		True	-10	True	GridWorld	MIT	FullObsDiscrete	Individual_Q	1.0	0.05	2500000	6	True	IndivQLearningSlugs/146_14_6_none	none		0.05
IndivQLearningSlugs/147_14_7	none		True	-10	True	GridWorld	MIT	FullObsDiscrete	Individual_Q	1.0	0.05	2500000	7	True	IndivQLearningSlugs/147_14_7_slugs_centralized	slugs_centralized	shields/general_shield	0.05
IndivQLearningSlugs/147_14_7	none		True	-10	True	GridWorld	MIT	FullObsDiscrete	Individual_Q	1.0	0.05	2500000	7	True	IndivQLearningSlugs/147_14_7_slugs_decentralized	slugs_decentralized	shields/general_shield	0.05
IndivQLearningSlugs/147_14_7	none		True	-10	True	GridWorld	MIT	FullObsDiscrete	Individual_Q	1.0	0.05	2500000	7	True	IndivQLearningSlugs/147_14_7_none	none		0.05
IndivQLearningSlugs/148_14_8	none		True	-10	True	GridWorld	MIT	FullObsDiscrete	Individual_Q	1.0	0.05	2500000	8	True	IndivQLearningSlugs/148_14_8_slugs_centralized	slugs_centralized	shields/general_shield	0.05
IndivQLearningSlugs/148_14_8	none		True	-10	True	GridWorld	MIT	FullObsDiscrete	Individual_Q	1.0	0.05	2500000	8	True	IndivQLearningSlugs/148_14_8_slugs_decentralized	slugs_decentralized	shields/general_shield	0.05
IndivQLearningSlugs/148_14_8	none		True	-10	True	GridWorld	MIT	FullObsDiscrete	Individual_Q	1.0	0.05	2500000	8	True	IndivQLearningSlugs/148_14_8_none	none		0.05
IndivQLearningSlugs/149_14_9	none		True	-10	True	GridWorld	MIT	FullObsDiscrete	Individual_Q	1.0	0.05	2500000	9	True	IndivQLearningSlugs/149_14_9_slugs_centralized	slugs_centralized	shields/general_shield	0.05
IndivQLearningSlugs/149_14_9	none		True	-10	True	GridWorld	MIT	FullObsDiscrete	Individual_Q	1.0	0.05	2500000	9	True	IndivQLearningSlugs/149_14_9_slugs_decentralized	slugs_decentralized	shields/general_shield	0.05
IndivQLearningSlugs/149_14_9	none		True	-10	True	GridWorld	MIT	FullObsDiscrete	Individual_Q	1.0	0.05	2500000	9	True	IndivQLearningSlugs/149_14_9_none	none		0.05
IndivQLearningSlugs/150_15_0	slugs_centralized	shields/general_shield	True	-10	False	GridWorld	MIT	FullObsDiscrete	Individual_Q	1.0	0.05	2500000	0	True	IndivQLearningSlugs/150_15_0_slugs_centralized	slugs_centralized	shields/general_shield	0.05
IndivQLearningSlugs/150_15_0	slugs_centralized	shields/general_shield	True	-10	False	GridWorld	MIT	FullObsDiscrete	Individual_Q	1.0	0.05	2500000	0	True	IndivQLearningSlugs/150_15_0_slugs_decentralized	slugs_decentralized	shields/general_shield	0.05
IndivQLearningSlugs/150_15_0	slugs_centralized	shields/general_shield	True	-10	False	GridWorld	MIT	FullObsDiscrete	Individual_Q	1.0	0.05	2500000	0	True	IndivQLearningSlugs/150_15_0_none	none		0.05
IndivQLearningSlugs/151_15_1	slugs_centralized	shields/general_shield	True	-10	False	GridWorld	MIT	FullObsDiscrete	Individual_Q	1.0	0.05	2500000	1	True	IndivQLearningSlugs/151_15_1_slugs_centralized	slugs_centralized	shields/general_shield	0.05
IndivQLearningSlugs/151_15_1	slugs_centralized	shields/general_shield	True	-10	False	GridWorld	MIT	FullObsDiscrete	Individual_Q	1.0	0.05	2500000	1	True	IndivQLearningSlugs/151_15_1_slugs_decentralized	slugs_decentralized	shields/general_shield	0.05
IndivQLearningSlugs/151_15_1	slugs_centralized	shields/general_shield	True	-10	False	GridWorld	MIT	FullObsDiscrete	Individual_Q	1.0	0.05	2500000	1	True	IndivQLearningSlugs/151_15_1_none	none		0.05
IndivQLearningSlugs/152_15_2	slugs_centralized	shields/general_shield	True	-10	False	GridWorld	MIT	FullObsDiscrete	Individual_Q	1.0	0.05	2500000	2	True	IndivQLearningSlugs/152_15_2_slugs_centralized	slugs_centralized	shields/general_shield	0.05
IndivQLearningSlugs/152_15_2	slugs_centralized	shields/general_shield	True	-10	False	GridWorld	MIT	FullObsDiscrete	Individual_Q	1.0	0.05	2500000	2	True	IndivQLearningSlugs/152_15_2_slugs_decentralized	slugs_decentralized	shields/general_shield	0.05
IndivQLearningSlugs/152_15_2	slugs_centralized	shields/general_shield	True	-10	False	GridWorld	MIT	FullObsDiscrete	Individual_Q	1.0	0.05	2500000	2	True	IndivQLearningSlugs/152_15_2_none	none		0.05
IndivQLearningSlugs/153_15_3	slugs_centralized	shields/general_shield	True	-10	False	GridWorld	MIT	FullObsDiscrete	Individual_Q	1.0	0.05	2500000	3	True	IndivQLearningSlugs/153_15_3_slugs_centralized	slugs_centralized	shields/general_shield	0.05
IndivQLearningSlugs/153_15_3	slugs_centralized	shields/general_shield	True	-10	False	GridWorld	MIT	FullObsDiscrete	Individual_Q	1.0	0.05	2500000	3	True	IndivQLearningSlugs/153_15_3_slugs_decentralized	slugs_decentralized	shields/general_shield	0.05
IndivQLearningSlugs/153_15_3	slugs_centralized	shields/general_shield	True	-10	False	GridWorld	MIT	FullObsDiscrete	Individual_Q	1.0	0.05	2500000	3	True	IndivQLearningSlugs/153_15_3_none	none		0.05
IndivQLearningSlugs/154_15_4	slugs_centralized	shields/general_shield	True	-10	False	GridWorld	MIT	FullObsDiscrete	Individual_Q	1.0	0.05	2500000	4	True	IndivQLearningSlugs/154_15_4_slugs_centralized	slugs_centralized	shields/general_shield	0.05
IndivQLearningSlugs/154_15_4	slugs_centralized	shields/general_shield	True	-10	False	GridWorld	MIT	FullObsDiscrete	Individual_Q	1.0	0.05	2500000	4	True	IndivQLearningSlugs/154_15_4_slugs_decentralized	slugs_decentralized	shields/general_shield	0.05
IndivQLearningSlugs/154_15_4	slugs_centralized	shields/general_shield	True	-10	False	GridWorld	MIT	FullObsDiscrete	Individual_Q	1.0	0.05	2500000	4	True	IndivQLearningSlugs/154_15_4_none	none		0.05
IndivQLearningSlugs/155_15_5	slugs_centralized	shields/general_shield	True	-10	False	GridWorld	MIT	FullObsDiscrete	Individual_Q	1.0	0.05	2500000	5	True	IndivQLearningSlugs/155_15_5_slugs_centralized	slugs_centralized	shields/general_shield	0.05
IndivQLearningSlugs/155_15_5	slugs_centralized	shields/general_shield	True	-10	False	GridWorld	MIT	FullObsDiscrete	Individual_Q	1.0	0.05	2500000	5	True	IndivQLearningSlugs/155_15_5_slugs_decentralized	slugs_decentralized	shields/general_shield	0.05
IndivQLearningSlugs/155_15_5	slugs_centralized	shields/general_shield	True	-10	False	GridWorld	MIT	FullObsDiscrete	Individual_Q	1.0	0.05	2500000	5	True	IndivQLearningSlugs/155_15_5_none	none		0.05
IndivQLearningSlugs/156_15_6	slugs_centralized	shields/general_shield	True	-10	False	GridWorld	MIT	FullObsDiscrete	Individual_Q	1.0	0.05	2500000	6	True	IndivQLearningSlugs/156_15_6_slugs_centralized	slugs_centralized	shields/general_shield	0.05
IndivQLearningSlugs/156_15_6	slugs_centralized	shields/general_shield	True	-10	False	GridWorld	MIT	FullObsDiscrete	Individual_Q	1.0	0.05	2500000	6	True	IndivQLearningSlugs/156_15_6_slugs_decentralized	slugs_decentralized	shields/general_shield	0.05
IndivQLearningSlugs/156_15_6	slugs_centralized	shields/general_shield	True	-10	False	GridWorld	MIT	FullObsDiscrete	Individual_Q	1.0	0.05	2500000	6	True	IndivQLearningSlugs/156_15_6_none	none		0.05
IndivQLearningSlugs/157_15_7	slugs_centralized	shields/general_shield	True	-10	False	GridWorld	MIT	FullObsDiscrete	Individual_Q	1.0	0.05	2500000	7	True	IndivQLearningSlugs/157_15_7_slugs_centralized	slugs_centralized	shields/general_shield	0.05
IndivQLearningSlugs/157_15_7	slugs_centralized	shields/general_shield	True	-10	False	GridWorld	MIT	FullObsDiscrete	Individual_Q	1.0	0.05	2500000	7	True	IndivQLearningSlugs/157_15_7_slugs_decentralized	slugs_decentralized	shields/general_shield	0.05
IndivQLearningSlugs/157_15_7	slugs_centralized	shields/general_shield	True	-10	False	GridWorld	MIT	FullObsDiscrete	Individual_Q	1.0	0.05	2500000	7	True	IndivQLearningSlugs/157_15_7_none	none		0.05
IndivQLearningSlugs/158_15_8	slugs_centralized	shields/general_shield	True	-10	False	GridWorld	MIT	FullObsDiscrete	Individual_Q	1.0	0.05	2500000	8	True	IndivQLearningSlugs/158_15_8_slugs_centralized	slugs_centralized	shields/general_shield	0.05
IndivQLearningSlugs/158_15_8	slugs_centralized	shields/general_shield	True	-10	False	GridWorld	MIT	FullObsDiscrete	Individual_Q	1.0	0.05	2500000	8	True	IndivQLearningSlugs/158_15_8_slugs_decentralized	slugs_decentralized	shields/general_shield	0.05
IndivQLearningSlugs/158_15_8	slugs_centralized	shields/general_shield	True	-10	False	GridWorld	MIT	FullObsDiscrete	Individual_Q	1.0	0.05	2500000	8	True	IndivQLearningSlugs/158_15_8_none	none		0.05
IndivQLearningSlugs/159_15_9	slugs_centralized	shields/general_shield	True	-10	False	GridWorld	MIT	FullObsDiscrete	Individual_Q	1.0	0.05	2500000	9	True	IndivQLearningSlugs/159_15_9_slugs_centralized	slugs_centralized	shields/general_shield	0.05
IndivQLearningSlugs/159_15_9	slugs_centralized	shields/general_shield	True	-10	False	GridWorld	MIT	FullObsDiscrete	Individual_Q	1.0	0.05	2500000	9	True	IndivQLearningSlugs/159_15_9_slugs_decentralized	slugs_decentralized	shields/general_shield	0.05
IndivQLearningSlugs/159_15_9	slugs_centralized	shields/general_shield	True	-10	False	GridWorld	MIT	FullObsDiscrete	Individual_Q	1.0	0.05	2500000	9	True	IndivQLearningSlugs/159_15_9_none	none		0.05
IndivQLearningSlugs/160_16_0	slugs_decentralized	shields/general_shield	True	-10	False	GridWorld	MIT	FullObsDiscrete	Individual_Q	1.0	0.05	2500000	0	True	IndivQLearningSlugs/160_16_0_slugs_centralized	slugs_centralized	shields/general_shield	0.05
IndivQLearningSlugs/160_16_0	slugs_decentralized	shields/general_shield	True	-10	False	GridWorld	MIT	FullObsDiscrete	Individual_Q	1.0	0.05	2500000	0	True	IndivQLearningSlugs/160_16_0_slugs_decentralized	slugs_decentralized	shields/general_shield	0.05
IndivQLearningSlugs/160_16_0	slugs_decentralized	shields/general_shield	True	-10	False	GridWorld	MIT	FullObsDiscrete	Individual_Q	1.0	0.05	2500000	0	True	IndivQLearningSlugs/160_16_0_none	none		0.05
IndivQLearningSlugs/161_16_1	slugs_decentralized	shields/general_shield	True	-10	False	GridWorld	MIT	FullObsDiscrete	Individual_Q	1.0	0.05	2500000	1	True	IndivQLearningSlugs/161_16_1_slugs_centralized	slugs_centralized	shields/general_shield	0.05
IndivQLearningSlugs/161_16_1	slugs_decentralized	shields/general_shield	True	-10	False	GridWorld	MIT	FullObsDiscrete	Individual_Q	1.0	0.05	2500000	1	True	IndivQLearningSlugs/161_16_1_slugs_decentralized	slugs_decentralized	shields/general_shield	0.05
IndivQLearningSlugs/161_16_1	slugs_decentralized	shields/general_shield	True	-10	False	GridWorld	MIT	FullObsDiscrete	Individual_Q	1.0	0.05	2500000	1	True	IndivQLearningSlugs/161_16_1_none	none		0.05
IndivQLearningSlugs/162_16_2	slugs_decentralized	shields/general_shield	True	-10	False	GridWorld	MIT	FullObsDiscrete	Individual_Q	1.0	0.05	2500000	2	True	IndivQLearningSlugs/162_16_2_slugs_centralized	slugs_centralized	shields/general_shield	0.05
IndivQLearningSlugs/162_16_2	slugs_decentralized	shields/general_shield	True	-10	False	GridWorld	MIT	FullObsDiscrete	Individual_Q	1.0	0.05	2500000	2	True	IndivQLearningSlugs/162_16_2_slugs_decentralized	slugs_decentralized	shields/general_shield	0.05
IndivQLearningSlugs/162_16_2	slugs_decentralized	shields/general_shield	True	-10	False	GridWorld	MIT	FullObsDiscrete	Individual_Q	1.0	0.05	2500000	2	True	IndivQLearningSlugs/162_16_2_none	none		0.05
IndivQLearningSlugs/163_16_3	slugs_decentralized	shields/general_shield	True	-10	False	GridWorld	MIT	FullObsDiscrete	Individual_Q	1.0	0.05	2500000	3	True	IndivQLearningSlugs/163_16_3_slugs_centralized	slugs_centralized	shields/general_shield	0.05
IndivQLearningSlugs/163_16_3	slugs_decentralized	shields/general_shield	True	-10	False	GridWorld	MIT	FullObsDiscrete	Individual_Q	1.0	0.05	2500000	3	True	IndivQLearningSlugs/163_16_3_slugs_decentralized	slugs_decentralized	shields/general_shield	0.05
IndivQLearningSlugs/163_16_3	slugs_decentralized	shields/general_shield	True	-10	False	GridWorld	MIT	FullObsDiscrete	Individual_Q	1.0	0.05	2500000	3	True	IndivQLearningSlugs/163_16_3_none	none		0.05
IndivQLearningSlugs/164_16_4	slugs_decentralized	shields/general_shield	True	-10	False	GridWorld	MIT	FullObsDiscrete	Individual_Q	1.0	0.05	2500000	4	True	IndivQLearningSlugs/164_16_4_slugs_centralized	slugs_centralized	shields/general_shield	0.05
IndivQLearningSlugs/164_16_4	slugs_decentralized	shields/general_shield	True	-10	False	GridWorld	MIT	FullObsDiscrete	Individual_Q	1.0	0.05	2500000	4	True	IndivQLearningSlugs/164_16_4_slugs_decentralized	slugs_decentralized	shields/general_shield	0.05
IndivQLearningSlugs/164_16_4	slugs_decentralized	shields/general_shield	True	-10	False	GridWorld	MIT	FullObsDiscrete	Individual_Q	1.0	0.05	2500000	4	True	IndivQLearningSlugs/164_16_4_none	none		0.05
IndivQLearningSlugs/165_16_5	slugs_decentralized	shields/general_shield	True	-10	False	GridWorld	MIT	FullObsDiscrete	Individual_Q	1.0	0.05	2500000	5	True	IndivQLearningSlugs/165_16_5_slugs_centralized	slugs_centralized	shields/general_shield	0.05
IndivQLearningSlugs/165_16_5	slugs_decentralized	shields/general_shield	True	-10	False	GridWorld	MIT	FullObsDiscrete	Individual_Q	1.0	0.05	2500000	5	True	IndivQLearningSlugs/165_16_5_slugs_decentralized	slugs_decentralized	shields/general_shield	0.05
IndivQLearningSlugs/165_16_5	slugs_decentralized	shields/general_shield	True	-10	False	GridWorld	MIT	FullObsDiscrete	Individual_Q	1.0	0.05	2500000	5	True	IndivQLearningSlugs/165_16_5_none	none		0.05
IndivQLearningSlugs/166_16_6	slugs_decentralized	shields/general_shield	True	-10	False	GridWorld	MIT	FullObsDiscrete	Individual_Q	1.0	0.05	2500000	6	True	IndivQLearningSlugs/166_16_6_slugs_centralized	slugs_centralized	shields/general_shield	0.05
IndivQLearningSlugs/166_16_6	slugs_decentralized	shields/general_shield	True	-10	False	GridWorld	MIT	FullObsDiscrete	Individual_Q	1.0	0.05	2500000	6	True	IndivQLearningSlugs/166_16_6_slugs_decentralized	slugs_decentralized	shields/general_shield	0.05
IndivQLearningSlugs/166_16_6	slugs_decentralized	shields/general_shield	True	-10	False	GridWorld	MIT	FullObsDiscrete	Individual_Q	1.0	0.05	2500000	6	True	IndivQLearningSlugs/166_16_6_none	none		0.05
IndivQLearningSlugs/167_16_7	slugs_decentralized	shields/general_shield	True	-10	False	GridWorld	MIT	FullObsDiscrete	Individual_Q	1.0	0.05	2500000	7	True	IndivQLearningSlugs/167_16_7_slugs_centralized	slugs_centralized	shields/general_shield	0.05
IndivQLearningSlugs/167_16_7	slugs_decentralized	shields/general_shield	True	-10	False	GridWorld	MIT	FullObsDiscrete	Individual_Q	1.0	0.05	2500000	7	True	IndivQLearningSlugs/167_16_7_slugs_decentralized	slugs_decentralized	shields/general_shield	0.05
IndivQLearningSlugs/167_16_7	slugs_decentralized	shields/general_shield	True	-10	False	GridWorld	MIT	FullObsDiscrete	Individual_Q	1.0	0.05	2500000	7	True	IndivQLearningSlugs/167_16_7_none	none		0.05
IndivQLearningSlugs/168_16_8	slugs_decentralized	shields/general_shield	True	-10	False	GridWorld	MIT	FullObsDiscrete	Individual_Q	1.0	0.05	2500000	8	True	IndivQLearningSlugs/168_16_8_slugs_centralized	slugs_centralized	shields/general_shield	0.05
IndivQLearningSlugs/168_16_8	slugs_decentralized	shields/general_shield	True	-10	False	GridWorld	MIT	FullObsDiscrete	Individual_Q	1.0	0.05	2500000	8	True	IndivQLearningSlugs/168_16_8_slugs_decentralized	slugs_decentralized	shields/general_shield	0.05
IndivQLearningSlugs/168_16_8	slugs_decentralized	shields/general_shield	True	-10	False	GridWorld	MIT	FullObsDiscrete	Individual_Q	1.0	0.05	2500000	8	True	IndivQLearningSlugs/168_16_8_none	none		0.05
IndivQLearningSlugs/169_16_9	slugs_decentralized	shields/general_shield	True	-10	False	GridWorld	MIT	FullObsDiscrete	Individual_Q	1.0	0.05	2500000	9	True	IndivQLearningSlugs/169_16_9_slugs_centralized	slugs_centralized	shields/general_shield	0.05
IndivQLearningSlugs/169_16_9	slugs_decentralized	shields/general_shield	True	-10	False	GridWorld	MIT	FullObsDiscrete	Individual_Q	1.0	0.05	2500000	9	True	IndivQLearningSlugs/169_16_9_slugs_decentralized	slugs_decentralized	shields/general_shield	0.05
IndivQLearningSlugs/169_16_9	slugs_decentralized	shields/general_shield	True	-10	False	GridWorld	MIT	FullObsDiscrete	Individual_Q	1.0	0.05	2500000	9	True	IndivQLearningSlugs/169_16_9_none	none		0.05
IndivQLearningSlugs/170_17_0	none		True	-10	False	GridWorld	MIT	FullObsDiscrete	Individual_Q	1.0	0.05	2500000	0	True	IndivQLearningSlugs/170_17_0_slugs_centralized	slugs_centralized	shields/general_shield	0.05
IndivQLearningSlugs/170_17_0	none		True	-10	False	GridWorld	MIT	FullObsDiscrete	Individual_Q	1.0	0.05	2500000	0	True	IndivQLearningSlugs/170_17_0_slugs_decentralized	slugs_decentralized	shields/general_shield	0.05
IndivQLearningSlugs/170_17_0	none		True	-10	False	GridWorld	MIT	FullObsDiscrete	Individual_Q	1.0	0.05	2500000	0	True	IndivQLearningSlugs/170_17_0_none	none		0.05
IndivQLearningSlugs/171_17_1	none		True	-10	False	GridWorld	MIT	FullObsDiscrete	Individual_Q	1.0	0.05	2500000	1	True	IndivQLearningSlugs/171_17_1_slugs_centralized	slugs_centralized	shields/general_shield	0.05
IndivQLearningSlugs/171_17_1	none		True	-10	False	GridWorld	MIT	FullObsDiscrete	Individual_Q	1.0	0.05	2500000	1	True	IndivQLearningSlugs/171_17_1_slugs_decentralized	slugs_decentralized	shields/general_shield	0.05
IndivQLearningSlugs/171_17_1	none		True	-10	False	GridWorld	MIT	FullObsDiscrete	Individual_Q	1.0	0.05	2500000	1	True	IndivQLearningSlugs/171_17_1_none	none		0.05
IndivQLearningSlugs/172_17_2	none		True	-10	False	GridWorld	MIT	FullObsDiscrete	Individual_Q	1.0	0.05	2500000	2	True	IndivQLearningSlugs/172_17_2_slugs_centralized	slugs_centralized	shields/general_shield	0.05
IndivQLearningSlugs/172_17_2	none		True	-10	False	GridWorld	MIT	FullObsDiscrete	Individual_Q	1.0	0.05	2500000	2	True	IndivQLearningSlugs/172_17_2_slugs_decentralized	slugs_decentralized	shields/general_shield	0.05
IndivQLearningSlugs/172_17_2	none		True	-10	False	GridWorld	MIT	FullObsDiscrete	Individual_Q	1.0	0.05	2500000	2	True	IndivQLearningSlugs/172_17_2_none	none		0.05
IndivQLearningSlugs/173_17_3	none		True	-10	False	GridWorld	MIT	FullObsDiscrete	Individual_Q	1.0	0.05	2500000	3	True	IndivQLearningSlugs/173_17_3_slugs_centralized	slugs_centralized	shields/general_shield	0.05
IndivQLearningSlugs/173_17_3	none		True	-10	False	GridWorld	MIT	FullObsDiscrete	Individual_Q	1.0	0.05	2500000	3	True	IndivQLearningSlugs/173_17_3_slugs_decentralized	slugs_decentralized	shields/general_shield	0.05
IndivQLearningSlugs/173_17_3	none		True	-10	False	GridWorld	MIT	FullObsDiscrete	Individual_Q	1.0	0.05	2500000	3	True	IndivQLearningSlugs/173_17_3_none	none		0.05
IndivQLearningSlugs/174_17_4	none		True	-10	False	GridWorld	MIT	FullObsDiscrete	Individual_Q	1.0	0.05	2500000	4	True	IndivQLearningSlugs/174_17_4_slugs_centralized	slugs_centralized	shields/general_shield	0.05
IndivQLearningSlugs/174_17_4	none		True	-10	False	GridWorld	MIT	FullObsDiscrete	Individual_Q	1.0	0.05	2500000	4	True	IndivQLearningSlugs/174_17_4_slugs_decentralized	slugs_decentralized	shields/general_shield	0.05
IndivQLearningSlugs/174_17_4	none		True	-10	False	GridWorld	MIT	FullObsDiscrete	Individual_Q	1.0	0.05	2500000	4	True	IndivQLearningSlugs/174_17_4_none	none		0.05
IndivQLearningSlugs/175_17_5	none		True	-10	False	GridWorld	MIT	FullObsDiscrete	Individual_Q	1.0	0.05	2500000	5	True	IndivQLearningSlugs/175_17_5_slugs_centralized	slugs_centralized	shields/general_shield	0.05
IndivQLearningSlugs/175_17_5	none		True	-10	False	GridWorld	MIT	FullObsDiscrete	Individual_Q	1.0	0.05	2500000	5	True	IndivQLearningSlugs/175_17_5_slugs_decentralized	slugs_decentralized	shields/general_shield	0.05
IndivQLearningSlugs/175_17_5	none		True	-10	False	GridWorld	MIT	FullObsDiscrete	Individual_Q	1.0	0.05	2500000	5	True	IndivQLearningSlugs/175_17_5_none	none		0.05
IndivQLearningSlugs/176_17_6	none		True	-10	False	GridWorld	MIT	FullObsDiscrete	Individual_Q	1.0	0.05	2500000	6	True	IndivQLearningSlugs/176_17_6_slugs_centralized	slugs_centralized	shields/general_shield	0.05
IndivQLearningSlugs/176_17_6	none		True	-10	False	GridWorld	MIT	FullObsDiscrete	Individual_Q	1.0	0.05	2500000	6	True	IndivQLearningSlugs/176_17_6_slugs_decentralized	slugs_decentralized	shields/general_shield	0.05
IndivQLearningSlugs/176_17_6	none		True	-10	False	GridWorld	MIT	FullObsDiscrete	Individual_Q	1.0	0.05	2500000	6	True	IndivQLearningSlugs/176_17_6_none	none		0.05
IndivQLearningSlugs/177_17_7	none		True	-10	False	GridWorld	MIT	FullObsDiscrete	Individual_Q	1.0	0.05	2500000	7	True	IndivQLearningSlugs/177_17_7_slugs_centralized	slugs_centralized	shields/general_shield	0.05
IndivQLearningSlugs/177_17_7	none		True	-10	False	GridWorld	MIT	FullObsDiscrete	Individual_Q	1.0	0.05	2500000	7	True	IndivQLearningSlugs/177_17_7_slugs_decentralized	slugs_decentralized	shields/general_shield	0.05
IndivQLearningSlugs/177_17_7	none		True	-10	False	GridWorld	MIT	FullObsDiscrete	Individual_Q	1.0	0.05	2500000	7	True	IndivQLearningSlugs/177_17_7_none	none		0.05
IndivQLearningSlugs/178_17_8	none		True	-10	False	GridWorld	MIT	FullObsDiscrete	Individual_Q	1.0	0.05	2500000	8	True	IndivQLearningSlugs/178_17_8_slugs_centralized	slugs_centralized	shields/general_shield	0.05
IndivQLearningSlugs/178_17_8	none		True	-10	False	GridWorld	MIT	FullObsDiscrete	Individual_Q	1.0	0.05	2500000	8	True	IndivQLearningSlugs/178_17_8_slugs_decentralized	slugs_decentralized	shields/general_shield	0.05
IndivQLearningSlugs/178_17_8	none		True	-10	False	GridWorld	MIT	FullObsDiscrete	Individual_Q	1.0	0.05	2500000	8	True	IndivQLearningSlugs/178_17_8_none	none		0.05
IndivQLearningSlugs/179_17_9	none		True	-10	False	GridWorld	MIT	FullObsDiscrete	Individual_Q	1.0	0.05	2500000	9	True	IndivQLearningSlugs/179_17_9_slugs_centralized	slugs_centralized	shields/general_shield	0.05
IndivQLearningSlugs/179_17_9	none		True	-10	False	GridWorld	MIT	FullObsDiscrete	Individual_Q	1.0	0.05	2500000	9	True	IndivQLearningSlugs/179_17_9_slugs_decentralized	slugs_decentralized	shields/general_shield	0.05
IndivQLearningSlugs/179_17_9	none		True	-10	False	GridWorld	MIT	FullObsDiscrete	Individual_Q	1.0	0.05	2500000	9	True	IndivQLearningSlugs/179_17_9_none	none		0.05
IndivQLearningSlugs/180_18_0	slugs_centralized	shields/general_shield	True	-10	True	GridWorld	SUNY	FullObsDiscrete	Individual_Q	1.0	0.05	2500000	0	True	IndivQLearningSlugs/180_18_0_slugs_centralized	slugs_centralized	shields/general_shield	0.05
IndivQLearningSlugs/180_18_0	slugs_centralized	shields/general_shield	True	-10	True	GridWorld	SUNY	FullObsDiscrete	Individual_Q	1.0	0.05	2500000	0	True	IndivQLearningSlugs/180_18_0_slugs_decentralized	slugs_decentralized	shields/general_shield	0.05
IndivQLearningSlugs/180_18_0	slugs_centralized	shields/general_shield	True	-10	True	GridWorld	SUNY	FullObsDiscrete	Individual_Q	1.0	0.05	2500000	0	True	IndivQLearningSlugs/180_18_0_none	none		0.05
IndivQLearningSlugs/181_18_1	slugs_centralized	shields/general_shield	True	-10	True	GridWorld	SUNY	FullObsDiscrete	Individual_Q	1.0	0.05	2500000	1	True	IndivQLearningSlugs/181_18_1_slugs_centralized	slugs_centralized	shields/general_shield	0.05
IndivQLearningSlugs/181_18_1	slugs_centralized	shields/general_shield	True	-10	True	GridWorld	SUNY	FullObsDiscrete	Individual_Q	1.0	0.05	2500000	1	True	IndivQLearningSlugs/181_18_1_slugs_decentralized	slugs_decentralized	shields/general_shield	0.05
IndivQLearningSlugs/181_18_1	slugs_centralized	shields/general_shield	True	-10	True	GridWorld	SUNY	FullObsDiscrete	Individual_Q	1.0	0.05	2500000	1	True	IndivQLearningSlugs/181_18_1_none	none		0.05
IndivQLearningSlugs/182_18_2	slugs_centralized	shields/general_shield	True	-10	True	GridWorld	SUNY	FullObsDiscrete	Individual_Q	1.0	0.05	2500000	2	True	IndivQLearningSlugs/182_18_2_slugs_centralized	slugs_centralized	shields/general_shield	0.05
IndivQLearningSlugs/182_18_2	slugs_centralized	shields/general_shield	True	-10	True	GridWorld	SUNY	FullObsDiscrete	Individual_Q	1.0	0.05	2500000	2	True	IndivQLearningSlugs/182_18_2_slugs_decentralized	slugs_decentralized	shields/general_shield	0.05
IndivQLearningSlugs/182_18_2	slugs_centralized	shields/general_shield	True	-10	True	GridWorld	SUNY	FullObsDiscrete	Individual_Q	1.0	0.05	2500000	2	True	IndivQLearningSlugs/182_18_2_none	none		0.05
IndivQLearningSlugs/183_18_3	slugs_centralized	shields/general_shield	True	-10	True	GridWorld	SUNY	FullObsDiscrete	Individual_Q	1.0	0.05	2500000	3	True	IndivQLearningSlugs/183_18_3_slugs_centralized	slugs_centralized	shields/general_shield	0.05
IndivQLearningSlugs/183_18_3	slugs_centralized	shields/general_shield	True	-10	True	GridWorld	SUNY	FullObsDiscrete	Individual_Q	1.0	0.05	2500000	3	True	IndivQLearningSlugs/183_18_3_slugs_decentralized	slugs_decentralized	shields/general_shield	0.05
IndivQLearningSlugs/183_18_3	slugs_centralized	shields/general_shield	True	-10	True	GridWorld	SUNY	FullObsDiscrete	Individual_Q	1.0	0.05	2500000	3	True	IndivQLearningSlugs/183_18_3_none	none		0.05
IndivQLearningSlugs/184_18_4	slugs_centralized	shields/general_shield	True	-10	True	GridWorld	SUNY	FullObsDiscrete	Individual_Q	1.0	0.05	2500000	4	True	IndivQLearningSlugs/184_18_4_slugs_centralized	slugs_centralized	shields/general_shield	0.05
IndivQLearningSlugs/184_18_4	slugs_centralized	shields/general_shield	True	-10	True	GridWorld	SUNY	FullObsDiscrete	Individual_Q	1.0	0.05	2500000	4	True	IndivQLearningSlugs/184_18_4_slugs_decentralized	slugs_decentralized	shields/general_shield	0.05
IndivQLearningSlugs/184_18_4	slugs_centralized	shields/general_shield	True	-10	True	GridWorld	SUNY	FullObsDiscrete	Individual_Q	1.0	0.05	2500000	4	True	IndivQLearningSlugs/184_18_4_none	none		0.05
IndivQLearningSlugs/185_18_5	slugs_centralized	shields/general_shield	True	-10	True	GridWorld	SUNY	FullObsDiscrete	Individual_Q	1.0	0.05	2500000	5	True	IndivQLearningSlugs/185_18_5_slugs_centralized	slugs_centralized	shields/general_shield	0.05
IndivQLearningSlugs/185_18_5	slugs_centralized	shields/general_shield	True	-10	True	GridWorld	SUNY	FullObsDiscrete	Individual_Q	1.0	0.05	2500000	5	True	IndivQLearningSlugs/185_18_5_slugs_decentralized	slugs_decentralized	shields/general_shield	0.05
IndivQLearningSlugs/185_18_5	slugs_centralized	shields/general_shield	True	-10	True	GridWorld	SUNY	FullObsDiscrete	Individual_Q	1.0	0.05	2500000	5	True	IndivQLearningSlugs/185_18_5_none	none		0.05
IndivQLearningSlugs/186_18_6	slugs_centralized	shields/general_shield	True	-10	True	GridWorld	SUNY	FullObsDiscrete	Individual_Q	1.0	0.05	2500000	6	True	IndivQLearningSlugs/186_18_6_slugs_centralized	slugs_centralized	shields/general_shield	0.05
IndivQLearningSlugs/186_18_6	slugs_centralized	shields/general_shield	True	-10	True	GridWorld	SUNY	FullObsDiscrete	Individual_Q	1.0	0.05	2500000	6	True	IndivQLearningSlugs/186_18_6_slugs_decentralized	slugs_decentralized	shields/general_shield	0.05
IndivQLearningSlugs/186_18_6	slugs_centralized	shields/general_shield	True	-10	True	GridWorld	SUNY	FullObsDiscrete	Individual_Q	1.0	0.05	2500000	6	True	IndivQLearningSlugs/186_18_6_none	none		0.05
IndivQLearningSlugs/187_18_7	slugs_centralized	shields/general_shield	True	-10	True	GridWorld	SUNY	FullObsDiscrete	Individual_Q	1.0	0.05	2500000	7	True	IndivQLearningSlugs/187_18_7_slugs_centralized	slugs_centralized	shields/general_shield	0.05
IndivQLearningSlugs/187_18_7	slugs_centralized	shields/general_shield	True	-10	True	GridWorld	SUNY	FullObsDiscrete	Individual_Q	1.0	0.05	2500000	7	True	IndivQLearningSlugs/187_18_7_slugs_decentralized	slugs_decentralized	shields/general_shield	0.05
IndivQLearningSlugs/187_18_7	slugs_centralized	shields/general_shield	True	-10	True	GridWorld	SUNY	FullObsDiscrete	Individual_Q	1.0	0.05	2500000	7	True	IndivQLearningSlugs/187_18_7_none	none		0.05
IndivQLearningSlugs/188_18_8	slugs_centralized	shields/general_shield	True	-10	True	GridWorld	SUNY	FullObsDiscrete	Individual_Q	1.0	0.05	2500000	8	True	IndivQLearningSlugs/188_18_8_slugs_centralized	slugs_centralized	shields/general_shield	0.05
IndivQLearningSlugs/188_18_8	slugs_centralized	shields/general_shield	True	-10	True	GridWorld	SUNY	FullObsDiscrete	Individual_Q	1.0	0.05	2500000	8	True	IndivQLearningSlugs/188_18_8_slugs_decentralized	slugs_decentralized	shields/general_shield	0.05
IndivQLearningSlugs/188_18_8	slugs_centralized	shields/general_shield	True	-10	True	GridWorld	SUNY	FullObsDiscrete	Individual_Q	1.0	0.05	2500000	8	True	IndivQLearningSlugs/188_18_8_none	none		0.05
IndivQLearningSlugs/189_18_9	slugs_centralized	shields/general_shield	True	-10	True	GridWorld	SUNY	FullObsDiscrete	Individual_Q	1.0	0.05	2500000	9	True	IndivQLearningSlugs/189_18_9_slugs_centralized	slugs_centralized	shields/general_shield	0.05
IndivQLearningSlugs/189_18_9	slugs_centralized	shields/general_shield	True	-10	True	GridWorld	SUNY	FullObsDiscrete	Individual_Q	1.0	0.05	2500000	9	True	IndivQLearningSlugs/189_18_9_slugs_decentralized	slugs_decentralized	shields/general_shield	0.05
IndivQLearningSlugs/189_18_9	slugs_centralized	shields/general_shield	True	-10	True	GridWorld	SUNY	FullObsDiscrete	Individual_Q	1.0	0.05	2500000	9	True	IndivQLearningSlugs/189_18_9_none	none		0.05
IndivQLearningSlugs/190_19_0	slugs_decentralized	shields/general_shield	True	-10	True	GridWorld	SUNY	FullObsDiscrete	Individual_Q	1.0	0.05	2500000	0	True	IndivQLearningSlugs/190_19_0_slugs_centralized	slugs_centralized	shields/general_shield	0.05
IndivQLearningSlugs/190_19_0	slugs_decentralized	shields/general_shield	True	-10	True	GridWorld	SUNY	FullObsDiscrete	Individual_Q	1.0	0.05	2500000	0	True	IndivQLearningSlugs/190_19_0_slugs_decentralized	slugs_decentralized	shields/general_shield	0.05
IndivQLearningSlugs/190_19_0	slugs_decentralized	shields/general_shield	True	-10	True	GridWorld	SUNY	FullObsDiscrete	Individual_Q	1.0	0.05	2500000	0	True	IndivQLearningSlugs/190_19_0_none	none		0.05
IndivQLearningSlugs/191_19_1	slugs_decentralized	shields/general_shield	True	-10	True	GridWorld	SUNY	FullObsDiscrete	Individual_Q	1.0	0.05	2500000	1	True	IndivQLearningSlugs/191_19_1_slugs_centralized	slugs_centralized	shields/general_shield	0.05
IndivQLearningSlugs/191_19_1	slugs_decentralized	shields/general_shield	True	-10	True	GridWorld	SUNY	FullObsDiscrete	Individual_Q	1.0	0.05	2500000	1	True	IndivQLearningSlugs/191_19_1_slugs_decentralized	slugs_decentralized	shields/general_shield	0.05
IndivQLearningSlugs/191_19_1	slugs_decentralized	shields/general_shield	True	-10	True	GridWorld	SUNY	FullObsDiscrete	Individual_Q	1.0	0.05	2500000	1	True	IndivQLearningSlugs/191_19_1_none	none		0.05
IndivQLearningSlugs/192_19_2	slugs_decentralized	shields/general_shield	True	-10	True	GridWorld	SUNY	FullObsDiscrete	Individual_Q	1.0	0.05	2500000	2	True	IndivQLearningSlugs/192_19_2_slugs_centralized	slugs_centralized	shields/general_shield	0.05
IndivQLearningSlugs/192_19_2	slugs_decentralized	shields/general_shield	True	-10	True	GridWorld	SUNY	FullObsDiscrete	Individual_Q	1.0	0.05	2500000	2	True	IndivQLearningSlugs/192_19_2_slugs_decentralized	slugs_decentralized	shields/general_shield	0.05
IndivQLearningSlugs/192_19_2	slugs_decentralized	shields/general_shield	True	-10	True	GridWorld	SUNY	FullObsDiscrete	Individual_Q	1.0	0.05	2500000	2	True	IndivQLearningSlugs/192_19_2_none	none		0.05
IndivQLearningSlugs/193_19_3	slugs_decentralized	shields/general_shield	True	-10	True	GridWorld	SUNY	FullObsDiscrete	Individual_Q	1.0	0.05	2500000	3	True	IndivQLearningSlugs/193_19_3_slugs_centralized	slugs_centralized	shields/general_shield	0.05
IndivQLearningSlugs/193_19_3	slugs_decentralized	shields/general_shield	True	-10	True	GridWorld	SUNY	FullObsDiscrete	Individual_Q	1.0	0.05	2500000	3	True	IndivQLearningSlugs/193_19_3_slugs_decentralized	slugs_decentralized	shields/general_shield	0.05
IndivQLearningSlugs/193_19_3	slugs_decentralized	shields/general_shield	True	-10	True	GridWorld	SUNY	FullObsDiscrete	Individual_Q	1.0	0.05	2500000	3	True	IndivQLearningSlugs/193_19_3_none	none		0.05
IndivQLearningSlugs/194_19_4	slugs_decentralized	shields/general_shield	True	-10	True	GridWorld	SUNY	FullObsDiscrete	Individual_Q	1.0	0.05	2500000	4	True	IndivQLearningSlugs/194_19_4_slugs_centralized	slugs_centralized	shields/general_shield	0.05
IndivQLearningSlugs/194_19_4	slugs_decentralized	shields/general_shield	True	-10	True	GridWorld	SUNY	FullObsDiscrete	Individual_Q	1.0	0.05	2500000	4	True	IndivQLearningSlugs/194_19_4_slugs_decentralized	slugs_decentralized	shields/general_shield	0.05
IndivQLearningSlugs/194_19_4	slugs_decentralized	shields/general_shield	True	-10	True	GridWorld	SUNY	FullObsDiscrete	Individual_Q	1.0	0.05	2500000	4	True	IndivQLearningSlugs/194_19_4_none	none		0.05
IndivQLearningSlugs/195_19_5	slugs_decentralized	shields/general_shield	True	-10	True	GridWorld	SUNY	FullObsDiscrete	Individual_Q	1.0	0.05	2500000	5	True	IndivQLearningSlugs/195_19_5_slugs_centralized	slugs_centralized	shields/general_shield	0.05
IndivQLearningSlugs/195_19_5	slugs_decentralized	shields/general_shield	True	-10	True	GridWorld	SUNY	FullObsDiscrete	Individual_Q	1.0	0.05	2500000	5	True	IndivQLearningSlugs/195_19_5_slugs_decentralized	slugs_decentralized	shields/general_shield	0.05
IndivQLearningSlugs/195_19_5	slugs_decentralized	shields/general_shield	True	-10	True	GridWorld	SUNY	FullObsDiscrete	Individual_Q	1.0	0.05	2500000	5	True	IndivQLearningSlugs/195_19_5_none	none		0.05
IndivQLearningSlugs/196_19_6	slugs_decentralized	shields/general_shield	True	-10	True	GridWorld	SUNY	FullObsDiscrete	Individual_Q	1.0	0.05	2500000	6	True	IndivQLearningSlugs/196_19_6_slugs_centralized	slugs_centralized	shields/general_shield	0.05
IndivQLearningSlugs/196_19_6	slugs_decentralized	shields/general_shield	True	-10	True	GridWorld	SUNY	FullObsDiscrete	Individual_Q	1.0	0.05	2500000	6	True	IndivQLearningSlugs/196_19_6_slugs_decentralized	slugs_decentralized	shields/general_shield	0.05
IndivQLearningSlugs/196_19_6	slugs_decentralized	shields/general_shield	True	-10	True	GridWorld	SUNY	FullObsDiscrete	Individual_Q	1.0	0.05	2500000	6	True	IndivQLearningSlugs/196_19_6_none	none		0.05
IndivQLearningSlugs/197_19_7	slugs_decentralized	shields/general_shield	True	-10	True	GridWorld	SUNY	FullObsDiscrete	Individual_Q	1.0	0.05	2500000	7	True	IndivQLearningSlugs/197_19_7_slugs_centralized	slugs_centralized	shields/general_shield	0.05
IndivQLearningSlugs/197_19_7	slugs_decentralized	shields/general_shield	True	-10	True	GridWorld	SUNY	FullObsDiscrete	Individual_Q	1.0	0.05	2500000	7	True	IndivQLearningSlugs/197_19_7_slugs_decentralized	slugs_decentralized	shields/general_shield	0.05
IndivQLearningSlugs/197_19_7	slugs_decentralized	shields/general_shield	True	-10	True	GridWorld	SUNY	FullObsDiscrete	Individual_Q	1.0	0.05	2500000	7	True	IndivQLearningSlugs/197_19_7_none	none		0.05
IndivQLearningSlugs/198_19_8	slugs_decentralized	shields/general_shield	True	-10	True	GridWorld	SUNY	FullObsDiscrete	Individual_Q	1.0	0.05	2500000	8	True	IndivQLearningSlugs/198_19_8_slugs_centralized	slugs_centralized	shields/general_shield	0.05
IndivQLearningSlugs/198_19_8	slugs_decentralized	shields/general_shield	True	-10	True	GridWorld	SUNY	FullObsDiscrete	Individual_Q	1.0	0.05	2500000	8	True	IndivQLearningSlugs/198_19_8_slugs_decentralized	slugs_decentralized	shields/general_shield	0.05
IndivQLearningSlugs/198_19_8	slugs_decentralized	shields/general_shield	True	-10	True	GridWorld	SUNY	FullObsDiscrete	Individual_Q	1.0	0.05	2500000	8	True	IndivQLearningSlugs/198_19_8_none	none		0.05
IndivQLearningSlugs/199_19_9	slugs_decentralized	shields/general_shield	True	-10	True	GridWorld	SUNY	FullObsDiscrete	Individual_Q	1.0	0.05	2500000	9	True	IndivQLearningSlugs/199_19_9_slugs_centralized	slugs_centralized	shields/general_shield	0.05
IndivQLearningSlugs/199_19_9	slugs_decentralized	shields/general_shield	True	-10	True	GridWorld	SUNY	FullObsDiscrete	Individual_Q	1.0	0.05	2500000	9	True	IndivQLearningSlugs/199_19_9_slugs_decentralized	slugs_decentralized	shields/general_shield	0.05
IndivQLearningSlugs/199_19_9	slugs_decentralized	shields/general_shield	True	-10	True	GridWorld	SUNY	FullObsDiscrete	Individual_Q	1.0	0.05	2500000	9	True	IndivQLearningSlugs/199_19_9_none	none		0.05
IndivQLearningSlugs/200_20_0	none		True	-10	True	GridWorld	SUNY	FullObsDiscrete	Individual_Q	1.0	0.05	2500000	0	True	IndivQLearningSlugs/200_20_0_slugs_centralized	slugs_centralized	shields/general_shield	0.05
IndivQLearningSlugs/200_20_0	none		True	-10	True	GridWorld	SUNY	FullObsDiscrete	Individual_Q	1.0	0.05	2500000	0	True	IndivQLearningSlugs/200_20_0_slugs_decentralized	slugs_decentralized	shields/general_shield	0.05
IndivQLearningSlugs/200_20_0	none		True	-10	True	GridWorld	SUNY	FullObsDiscrete	Individual_Q	1.0	0.05	2500000	0	True	IndivQLearningSlugs/200_20_0_none	none		0.05
IndivQLearningSlugs/201_20_1	none		True	-10	True	GridWorld	SUNY	FullObsDiscrete	Individual_Q	1.0	0.05	2500000	1	True	IndivQLearningSlugs/201_20_1_slugs_centralized	slugs_centralized	shields/general_shield	0.05
IndivQLearningSlugs/201_20_1	none		True	-10	True	GridWorld	SUNY	FullObsDiscrete	Individual_Q	1.0	0.05	2500000	1	True	IndivQLearningSlugs/201_20_1_slugs_decentralized	slugs_decentralized	shields/general_shield	0.05
IndivQLearningSlugs/201_20_1	none		True	-10	True	GridWorld	SUNY	FullObsDiscrete	Individual_Q	1.0	0.05	2500000	1	True	IndivQLearningSlugs/201_20_1_none	none		0.05
IndivQLearningSlugs/202_20_2	none		True	-10	True	GridWorld	SUNY	FullObsDiscrete	Individual_Q	1.0	0.05	2500000	2	True	IndivQLearningSlugs/202_20_2_slugs_centralized	slugs_centralized	shields/general_shield	0.05
IndivQLearningSlugs/202_20_2	none		True	-10	True	GridWorld	SUNY	FullObsDiscrete	Individual_Q	1.0	0.05	2500000	2	True	IndivQLearningSlugs/202_20_2_slugs_decentralized	slugs_decentralized	shields/general_shield	0.05
IndivQLearningSlugs/202_20_2	none		True	-10	True	GridWorld	SUNY	FullObsDiscrete	Individual_Q	1.0	0.05	2500000	2	True	IndivQLearningSlugs/202_20_2_none	none		0.05
IndivQLearningSlugs/203_20_3	none		True	-10	True	GridWorld	SUNY	FullObsDiscrete	Individual_Q	1.0	0.05	2500000	3	True	IndivQLearningSlugs/203_20_3_slugs_centralized	slugs_centralized	shields/general_shield	0.05
IndivQLearningSlugs/203_20_3	none		True	-10	True	GridWorld	SUNY	FullObsDiscrete	Individual_Q	1.0	0.05	2500000	3	True	IndivQLearningSlugs/203_20_3_slugs_decentralized	slugs_decentralized	shields/general_shield	0.05
IndivQLearningSlugs/203_20_3	none		True	-10	True	GridWorld	SUNY	FullObsDiscrete	Individual_Q	1.0	0.05	2500000	3	True	IndivQLearningSlugs/203_20_3_none	none		0.05
IndivQLearningSlugs/204_20_4	none		True	-10	True	GridWorld	SUNY	FullObsDiscrete	Individual_Q	1.0	0.05	2500000	4	True	IndivQLearningSlugs/204_20_4_slugs_centralized	slugs_centralized	shields/general_shield	0.05
IndivQLearningSlugs/204_20_4	none		True	-10	True	GridWorld	SUNY	FullObsDiscrete	Individual_Q	1.0	0.05	2500000	4	True	IndivQLearningSlugs/204_20_4_slugs_decentralized	slugs_decentralized	shields/general_shield	0.05
IndivQLearningSlugs/204_20_4	none		True	-10	True	GridWorld	SUNY	FullObsDiscrete	Individual_Q	1.0	0.05	2500000	4	True	IndivQLearningSlugs/204_20_4_none	none		0.05
IndivQLearningSlugs/205_20_5	none		True	-10	True	GridWorld	SUNY	FullObsDiscrete	Individual_Q	1.0	0.05	2500000	5	True	IndivQLearningSlugs/205_20_5_slugs_centralized	slugs_centralized	shields/general_shield	0.05
IndivQLearningSlugs/205_20_5	none		True	-10	True	GridWorld	SUNY	FullObsDiscrete	Individual_Q	1.0	0.05	2500000	5	True	IndivQLearningSlugs/205_20_5_slugs_decentralized	slugs_decentralized	shields/general_shield	0.05
IndivQLearningSlugs/205_20_5	none		True	-10	True	GridWorld	SUNY	FullObsDiscrete	Individual_Q	1.0	0.05	2500000	5	True	IndivQLearningSlugs/205_20_5_none	none		0.05
IndivQLearningSlugs/206_20_6	none		True	-10	True	GridWorld	SUNY	FullObsDiscrete	Individual_Q	1.0	0.05	2500000	6	True	IndivQLearningSlugs/206_20_6_slugs_centralized	slugs_centralized	shields/general_shield	0.05
IndivQLearningSlugs/206_20_6	none		True	-10	True	GridWorld	SUNY	FullObsDiscrete	Individual_Q	1.0	0.05	2500000	6	True	IndivQLearningSlugs/206_20_6_slugs_decentralized	slugs_decentralized	shields/general_shield	0.05
IndivQLearningSlugs/206_20_6	none		True	-10	True	GridWorld	SUNY	FullObsDiscrete	Individual_Q	1.0	0.05	2500000	6	True	IndivQLearningSlugs/206_20_6_none	none		0.05
IndivQLearningSlugs/207_20_7	none		True	-10	True	GridWorld	SUNY	FullObsDiscrete	Individual_Q	1.0	0.05	2500000	7	True	IndivQLearningSlugs/207_20_7_slugs_centralized	slugs_centralized	shields/general_shield	0.05
IndivQLearningSlugs/207_20_7	none		True	-10	True	GridWorld	SUNY	FullObsDiscrete	Individual_Q	1.0	0.05	2500000	7	True	IndivQLearningSlugs/207_20_7_slugs_decentralized	slugs_decentralized	shields/general_shield	0.05
IndivQLearningSlugs/207_20_7	none		True	-10	True	GridWorld	SUNY	FullObsDiscrete	Individual_Q	1.0	0.05	2500000	7	True	IndivQLearningSlugs/207_20_7_none	none		0.05
IndivQLearningSlugs/208_20_8	none		True	-10	True	GridWorld	SUNY	FullObsDiscrete	Individual_Q	1.0	0.05	2500000	8	True	IndivQLearningSlugs/208_20_8_slugs_centralized	slugs_centralized	shields/general_shield	0.05
IndivQLearningSlugs/208_20_8	none		True	-10	True	GridWorld	SUNY	FullObsDiscrete	Individual_Q	1.0	0.05	2500000	8	True	IndivQLearningSlugs/208_20_8_slugs_decentralized	slugs_decentralized	shields/general_shield	0.05
IndivQLearningSlugs/208_20_8	none		True	-10	True	GridWorld	SUNY	FullObsDiscrete	Individual_Q	1.0	0.05	2500000	8	True	IndivQLearningSlugs/208_20_8_none	none		0.05
IndivQLearningSlugs/209_20_9	none		True	-10	True	GridWorld	SUNY	FullObsDiscrete	Individual_Q	1.0	0.05	2500000	9	True	IndivQLearningSlugs/209_20_9_slugs_centralized	slugs_centralized	shields/general_shield	0.05
IndivQLearningSlugs/209_20_9	none		True	-10	True	GridWorld	SUNY	FullObsDiscrete	Individual_Q	1.0	0.05	2500000	9	True	IndivQLearningSlugs/209_20_9_slugs_decentralized	slugs_decentralized	shields/general_shield	0.05
IndivQLearningSlugs/209_20_9	none		True	-10	True	GridWorld	SUNY	FullObsDiscrete	Individual_Q	1.0	0.05	2500000	9	True	IndivQLearningSlugs/209_20_9_none	none		0.05
IndivQLearningSlugs/210_21_0	slugs_centralized	shields/general_shield	True	-10	False	GridWorld	SUNY	FullObsDiscrete	Individual_Q	1.0	0.05	2500000	0	True	IndivQLearningSlugs/210_21_0_slugs_centralized	slugs_centralized	shields/general_shield	0.05
IndivQLearningSlugs/210_21_0	slugs_centralized	shields/general_shield	True	-10	False	GridWorld	SUNY	FullObsDiscrete	Individual_Q	1.0	0.05	2500000	0	True	IndivQLearningSlugs/210_21_0_slugs_decentralized	slugs_decentralized	shields/general_shield	0.05
IndivQLearningSlugs/210_21_0	slugs_centralized	shields/general_shield	True	-10	False	GridWorld	SUNY	FullObsDiscrete	Individual_Q	1.0	0.05	2500000	0	True	IndivQLearningSlugs/210_21_0_none	none		0.05
IndivQLearningSlugs/211_21_1	slugs_centralized	shields/general_shield	True	-10	False	GridWorld	SUNY	FullObsDiscrete	Individual_Q	1.0	0.05	2500000	1	True	IndivQLearningSlugs/211_21_1_slugs_centralized	slugs_centralized	shields/general_shield	0.05
IndivQLearningSlugs/211_21_1	slugs_centralized	shields/general_shield	True	-10	False	GridWorld	SUNY	FullObsDiscrete	Individual_Q	1.0	0.05	2500000	1	True	IndivQLearningSlugs/211_21_1_slugs_decentralized	slugs_decentralized	shields/general_shield	0.05
IndivQLearningSlugs/211_21_1	slugs_centralized	shields/general_shield	True	-10	False	GridWorld	SUNY	FullObsDiscrete	Individual_Q	1.0	0.05	2500000	1	True	IndivQLearningSlugs/211_21_1_none	none		0.05
IndivQLearningSlugs/212_21_2	slugs_centralized	shields/general_shield	True	-10	False	GridWorld	SUNY	FullObsDiscrete	Individual_Q	1.0	0.05	2500000	2	True	IndivQLearningSlugs/212_21_2_slugs_centralized	slugs_centralized	shields/general_shield	0.05
IndivQLearningSlugs/212_21_2	slugs_centralized	shields/general_shield	True	-10	False	GridWorld	SUNY	FullObsDiscrete	Individual_Q	1.0	0.05	2500000	2	True	IndivQLearningSlugs/212_21_2_slugs_decentralized	slugs_decentralized	shields/general_shield	0.05
IndivQLearningSlugs/212_21_2	slugs_centralized	shields/general_shield	True	-10	False	GridWorld	SUNY	FullObsDiscrete	Individual_Q	1.0	0.05	2500000	2	True	IndivQLearningSlugs/212_21_2_none	none		0.05
IndivQLearningSlugs/213_21_3	slugs_centralized	shields/general_shield	True	-10	False	GridWorld	SUNY	FullObsDiscrete	Individual_Q	1.0	0.05	2500000	3	True	IndivQLearningSlugs/213_21_3_slugs_centralized	slugs_centralized	shields/general_shield	0.05
IndivQLearningSlugs/213_21_3	slugs_centralized	shields/general_shield	True	-10	False	GridWorld	SUNY	FullObsDiscrete	Individual_Q	1.0	0.05	2500000	3	True	IndivQLearningSlugs/213_21_3_slugs_decentralized	slugs_decentralized	shields/general_shield	0.05
IndivQLearningSlugs/213_21_3	slugs_centralized	shields/general_shield	True	-10	False	GridWorld	SUNY	FullObsDiscrete	Individual_Q	1.0	0.05	2500000	3	True	IndivQLearningSlugs/213_21_3_none	none		0.05
IndivQLearningSlugs/214_21_4	slugs_centralized	shields/general_shield	True	-10	False	GridWorld	SUNY	FullObsDiscrete	Individual_Q	1.0	0.05	2500000	4	True	IndivQLearningSlugs/214_21_4_slugs_centralized	slugs_centralized	shields/general_shield	0.05
IndivQLearningSlugs/214_21_4	slugs_centralized	shields/general_shield	True	-10	False	GridWorld	SUNY	FullObsDiscrete	Individual_Q	1.0	0.05	2500000	4	True	IndivQLearningSlugs/214_21_4_slugs_decentralized	slugs_decentralized	shields/general_shield	0.05
IndivQLearningSlugs/214_21_4	slugs_centralized	shields/general_shield	True	-10	False	GridWorld	SUNY	FullObsDiscrete	Individual_Q	1.0	0.05	2500000	4	True	IndivQLearningSlugs/214_21_4_none	none		0.05
IndivQLearningSlugs/215_21_5	slugs_centralized	shields/general_shield	True	-10	False	GridWorld	SUNY	FullObsDiscrete	Individual_Q	1.0	0.05	2500000	5	True	IndivQLearningSlugs/215_21_5_slugs_centralized	slugs_centralized	shields/general_shield	0.05
IndivQLearningSlugs/215_21_5	slugs_centralized	shields/general_shield	True	-10	False	GridWorld	SUNY	FullObsDiscrete	Individual_Q	1.0	0.05	2500000	5	True	IndivQLearningSlugs/215_21_5_slugs_decentralized	slugs_decentralized	shields/general_shield	0.05
IndivQLearningSlugs/215_21_5	slugs_centralized	shields/general_shield	True	-10	False	GridWorld	SUNY	FullObsDiscrete	Individual_Q	1.0	0.05	2500000	5	True	IndivQLearningSlugs/215_21_5_none	none		0.05
IndivQLearningSlugs/216_21_6	slugs_centralized	shields/general_shield	True	-10	False	GridWorld	SUNY	FullObsDiscrete	Individual_Q	1.0	0.05	2500000	6	True	IndivQLearningSlugs/216_21_6_slugs_centralized	slugs_centralized	shields/general_shield	0.05
IndivQLearningSlugs/216_21_6	slugs_centralized	shields/general_shield	True	-10	False	GridWorld	SUNY	FullObsDiscrete	Individual_Q	1.0	0.05	2500000	6	True	IndivQLearningSlugs/216_21_6_slugs_decentralized	slugs_decentralized	shields/general_shield	0.05
IndivQLearningSlugs/216_21_6	slugs_centralized	shields/general_shield	True	-10	False	GridWorld	SUNY	FullObsDiscrete	Individual_Q	1.0	0.05	2500000	6	True	IndivQLearningSlugs/216_21_6_none	none		0.05
IndivQLearningSlugs/217_21_7	slugs_centralized	shields/general_shield	True	-10	False	GridWorld	SUNY	FullObsDiscrete	Individual_Q	1.0	0.05	2500000	7	True	IndivQLearningSlugs/217_21_7_slugs_centralized	slugs_centralized	shields/general_shield	0.05
IndivQLearningSlugs/217_21_7	slugs_centralized	shields/general_shield	True	-10	False	GridWorld	SUNY	FullObsDiscrete	Individual_Q	1.0	0.05	2500000	7	True	IndivQLearningSlugs/217_21_7_slugs_decentralized	slugs_decentralized	shields/general_shield	0.05
IndivQLearningSlugs/217_21_7	slugs_centralized	shields/general_shield	True	-10	False	GridWorld	SUNY	FullObsDiscrete	Individual_Q	1.0	0.05	2500000	7	True	IndivQLearningSlugs/217_21_7_none	none		0.05
IndivQLearningSlugs/218_21_8	slugs_centralized	shields/general_shield	True	-10	False	GridWorld	SUNY	FullObsDiscrete	Individual_Q	1.0	0.05	2500000	8	True	IndivQLearningSlugs/218_21_8_slugs_centralized	slugs_centralized	shields/general_shield	0.05
IndivQLearningSlugs/218_21_8	slugs_centralized	shields/general_shield	True	-10	False	GridWorld	SUNY	FullObsDiscrete	Individual_Q	1.0	0.05	2500000	8	True	IndivQLearningSlugs/218_21_8_slugs_decentralized	slugs_decentralized	shields/general_shield	0.05
IndivQLearningSlugs/218_21_8	slugs_centralized	shields/general_shield	True	-10	False	GridWorld	SUNY	FullObsDiscrete	Individual_Q	1.0	0.05	2500000	8	True	IndivQLearningSlugs/218_21_8_none	none		0.05
IndivQLearningSlugs/219_21_9	slugs_centralized	shields/general_shield	True	-10	False	GridWorld	SUNY	FullObsDiscrete	Individual_Q	1.0	0.05	2500000	9	True	IndivQLearningSlugs/219_21_9_slugs_centralized	slugs_centralized	shields/general_shield	0.05
IndivQLearningSlugs/219_21_9	slugs_centralized	shields/general_shield	True	-10	False	GridWorld	SUNY	FullObsDiscrete	Individual_Q	1.0	0.05	2500000	9	True	IndivQLearningSlugs/219_21_9_slugs_decentralized	slugs_decentralized	shields/general_shield	0.05
IndivQLearningSlugs/219_21_9	slugs_centralized	shields/general_shield	True	-10	False	GridWorld	SUNY	FullObsDiscrete	Individual_Q	1.0	0.05	2500000	9	True	IndivQLearningSlugs/219_21_9_none	none		0.05
IndivQLearningSlugs/220_22_0	slugs_decentralized	shields/general_shield	True	-10	False	GridWorld	SUNY	FullObsDiscrete	Individual_Q	1.0	0.05	2500000	0	True	IndivQLearningSlugs/220_22_0_slugs_centralized	slugs_centralized	shields/general_shield	0.05
IndivQLearningSlugs/220_22_0	slugs_decentralized	shields/general_shield	True	-10	False	GridWorld	SUNY	FullObsDiscrete	Individual_Q	1.0	0.05	2500000	0	True	IndivQLearningSlugs/220_22_0_slugs_decentralized	slugs_decentralized	shields/general_shield	0.05
IndivQLearningSlugs/220_22_0	slugs_decentralized	shields/general_shield	True	-10	False	GridWorld	SUNY	FullObsDiscrete	Individual_Q	1.0	0.05	2500000	0	True	IndivQLearningSlugs/220_22_0_none	none		0.05
IndivQLearningSlugs/221_22_1	slugs_decentralized	shields/general_shield	True	-10	False	GridWorld	SUNY	FullObsDiscrete	Individual_Q	1.0	0.05	2500000	1	True	IndivQLearningSlugs/221_22_1_slugs_centralized	slugs_centralized	shields/general_shield	0.05
IndivQLearningSlugs/221_22_1	slugs_decentralized	shields/general_shield	True	-10	False	GridWorld	SUNY	FullObsDiscrete	Individual_Q	1.0	0.05	2500000	1	True	IndivQLearningSlugs/221_22_1_slugs_decentralized	slugs_decentralized	shields/general_shield	0.05
IndivQLearningSlugs/221_22_1	slugs_decentralized	shields/general_shield	True	-10	False	GridWorld	SUNY	FullObsDiscrete	Individual_Q	1.0	0.05	2500000	1	True	IndivQLearningSlugs/221_22_1_none	none		0.05
IndivQLearningSlugs/222_22_2	slugs_decentralized	shields/general_shield	True	-10	False	GridWorld	SUNY	FullObsDiscrete	Individual_Q	1.0	0.05	2500000	2	True	IndivQLearningSlugs/222_22_2_slugs_centralized	slugs_centralized	shields/general_shield	0.05
IndivQLearningSlugs/222_22_2	slugs_decentralized	shields/general_shield	True	-10	False	GridWorld	SUNY	FullObsDiscrete	Individual_Q	1.0	0.05	2500000	2	True	IndivQLearningSlugs/222_22_2_slugs_decentralized	slugs_decentralized	shields/general_shield	0.05
IndivQLearningSlugs/222_22_2	slugs_decentralized	shields/general_shield	True	-10	False	GridWorld	SUNY	FullObsDiscrete	Individual_Q	1.0	0.05	2500000	2	True	IndivQLearningSlugs/222_22_2_none	none		0.05
IndivQLearningSlugs/223_22_3	slugs_decentralized	shields/general_shield	True	-10	False	GridWorld	SUNY	FullObsDiscrete	Individual_Q	1.0	0.05	2500000	3	True	IndivQLearningSlugs/223_22_3_slugs_centralized	slugs_centralized	shields/general_shield	0.05
IndivQLearningSlugs/223_22_3	slugs_decentralized	shields/general_shield	True	-10	False	GridWorld	SUNY	FullObsDiscrete	Individual_Q	1.0	0.05	2500000	3	True	IndivQLearningSlugs/223_22_3_slugs_decentralized	slugs_decentralized	shields/general_shield	0.05
IndivQLearningSlugs/223_22_3	slugs_decentralized	shields/general_shield	True	-10	False	GridWorld	SUNY	FullObsDiscrete	Individual_Q	1.0	0.05	2500000	3	True	IndivQLearningSlugs/223_22_3_none	none		0.05
IndivQLearningSlugs/224_22_4	slugs_decentralized	shields/general_shield	True	-10	False	GridWorld	SUNY	FullObsDiscrete	Individual_Q	1.0	0.05	2500000	4	True	IndivQLearningSlugs/224_22_4_slugs_centralized	slugs_centralized	shields/general_shield	0.05
IndivQLearningSlugs/224_22_4	slugs_decentralized	shields/general_shield	True	-10	False	GridWorld	SUNY	FullObsDiscrete	Individual_Q	1.0	0.05	2500000	4	True	IndivQLearningSlugs/224_22_4_slugs_decentralized	slugs_decentralized	shields/general_shield	0.05
IndivQLearningSlugs/224_22_4	slugs_decentralized	shields/general_shield	True	-10	False	GridWorld	SUNY	FullObsDiscrete	Individual_Q	1.0	0.05	2500000	4	True	IndivQLearningSlugs/224_22_4_none	none		0.05
IndivQLearningSlugs/225_22_5	slugs_decentralized	shields/general_shield	True	-10	False	GridWorld	SUNY	FullObsDiscrete	Individual_Q	1.0	0.05	2500000	5	True	IndivQLearningSlugs/225_22_5_slugs_centralized	slugs_centralized	shields/general_shield	0.05
IndivQLearningSlugs/225_22_5	slugs_decentralized	shields/general_shield	True	-10	False	GridWorld	SUNY	FullObsDiscrete	Individual_Q	1.0	0.05	2500000	5	True	IndivQLearningSlugs/225_22_5_slugs_decentralized	slugs_decentralized	shields/general_shield	0.05
IndivQLearningSlugs/225_22_5	slugs_decentralized	shields/general_shield	True	-10	False	GridWorld	SUNY	FullObsDiscrete	Individual_Q	1.0	0.05	2500000	5	True	IndivQLearningSlugs/225_22_5_none	none		0.05
IndivQLearningSlugs/226_22_6	slugs_decentralized	shields/general_shield	True	-10	False	GridWorld	SUNY	FullObsDiscrete	Individual_Q	1.0	0.05	2500000	6	True	IndivQLearningSlugs/226_22_6_slugs_centralized	slugs_centralized	shields/general_shield	0.05
IndivQLearningSlugs/226_22_6	slugs_decentralized	shields/general_shield	True	-10	False	GridWorld	SUNY	FullObsDiscrete	Individual_Q	1.0	0.05	2500000	6	True	IndivQLearningSlugs/226_22_6_slugs_decentralized	slugs_decentralized	shields/general_shield	0.05
IndivQLearningSlugs/226_22_6	slugs_decentralized	shields/general_shield	True	-10	False	GridWorld	SUNY	FullObsDiscrete	Individual_Q	1.0	0.05	2500000	6	True	IndivQLearningSlugs/226_22_6_none	none		0.05
IndivQLearningSlugs/227_22_7	slugs_decentralized	shields/general_shield	True	-10	False	GridWorld	SUNY	FullObsDiscrete	Individual_Q	1.0	0.05	2500000	7	True	IndivQLearningSlugs/227_22_7_slugs_centralized	slugs_centralized	shields/general_shield	0.05
IndivQLearningSlugs/227_22_7	slugs_decentralized	shields/general_shield	True	-10	False	GridWorld	SUNY	FullObsDiscrete	Individual_Q	1.0	0.05	2500000	7	True	IndivQLearningSlugs/227_22_7_slugs_decentralized	slugs_decentralized	shields/general_shield	0.05
IndivQLearningSlugs/227_22_7	slugs_decentralized	shields/general_shield	True	-10	False	GridWorld	SUNY	FullObsDiscrete	Individual_Q	1.0	0.05	2500000	7	True	IndivQLearningSlugs/227_22_7_none	none		0.05
IndivQLearningSlugs/228_22_8	slugs_decentralized	shields/general_shield	True	-10	False	GridWorld	SUNY	FullObsDiscrete	Individual_Q	1.0	0.05	2500000	8	True	IndivQLearningSlugs/228_22_8_slugs_centralized	slugs_centralized	shields/general_shield	0.05
IndivQLearningSlugs/228_22_8	slugs_decentralized	shields/general_shield	True	-10	False	GridWorld	SUNY	FullObsDiscrete	Individual_Q	1.0	0.05	2500000	8	True	IndivQLearningSlugs/228_22_8_slugs_decentralized	slugs_decentralized	shields/general_shield	0.05
IndivQLearningSlugs/228_22_8	slugs_decentralized	shields/general_shield	True	-10	False	GridWorld	SUNY	FullObsDiscrete	Individual_Q	1.0	0.05	2500000	8	True	IndivQLearningSlugs/228_22_8_none	none		0.05
IndivQLearningSlugs/229_22_9	slugs_decentralized	shields/general_shield	True	-10	False	GridWorld	SUNY	FullObsDiscrete	Individual_Q	1.0	0.05	2500000	9	True	IndivQLearningSlugs/229_22_9_slugs_centralized	slugs_centralized	shields/general_shield	0.05
IndivQLearningSlugs/229_22_9	slugs_decentralized	shields/general_shield	True	-10	False	GridWorld	SUNY	FullObsDiscrete	Individual_Q	1.0	0.05	2500000	9	True	IndivQLearningSlugs/229_22_9_slugs_decentralized	slugs_decentralized	shields/general_shield	0.05
IndivQLearningSlugs/229_22_9	slugs_decentralized	shields/general_shield	True	-10	False	GridWorld	SUNY	FullObsDiscrete	Individual_Q	1.0	0.05	2500000	9	True	IndivQLearningSlugs/229_22_9_none	none		0.05
IndivQLearningSlugs/230_23_0	none		True	-10	False	GridWorld	SUNY	FullObsDiscrete	Individual_Q	1.0	0.05	2500000	0	True	IndivQLearningSlugs/230_23_0_slugs_centralized	slugs_centralized	shields/general_shield	0.05
IndivQLearningSlugs/230_23_0	none		True	-10	False	GridWorld	SUNY	FullObsDiscrete	Individual_Q	1.0	0.05	2500000	0	True	IndivQLearningSlugs/230_23_0_slugs_decentralized	slugs_decentralized	shields/general_shield	0.05
IndivQLearningSlugs/230_23_0	none		True	-10	False	GridWorld	SUNY	FullObsDiscrete	Individual_Q	1.0	0.05	2500000	0	True	IndivQLearningSlugs/230_23_0_none	none		0.05
IndivQLearningSlugs/231_23_1	none		True	-10	False	GridWorld	SUNY	FullObsDiscrete	Individual_Q	1.0	0.05	2500000	1	True	IndivQLearningSlugs/231_23_1_slugs_centralized	slugs_centralized	shields/general_shield	0.05
IndivQLearningSlugs/231_23_1	none		True	-10	False	GridWorld	SUNY	FullObsDiscrete	Individual_Q	1.0	0.05	2500000	1	True	IndivQLearningSlugs/231_23_1_slugs_decentralized	slugs_decentralized	shields/general_shield	0.05
IndivQLearningSlugs/231_23_1	none		True	-10	False	GridWorld	SUNY	FullObsDiscrete	Individual_Q	1.0	0.05	2500000	1	True	IndivQLearningSlugs/231_23_1_none	none		0.05
IndivQLearningSlugs/232_23_2	none		True	-10	False	GridWorld	SUNY	FullObsDiscrete	Individual_Q	1.0	0.05	2500000	2	True	IndivQLearningSlugs/232_23_2_slugs_centralized	slugs_centralized	shields/general_shield	0.05
IndivQLearningSlugs/232_23_2	none		True	-10	False	GridWorld	SUNY	FullObsDiscrete	Individual_Q	1.0	0.05	2500000	2	True	IndivQLearningSlugs/232_23_2_slugs_decentralized	slugs_decentralized	shields/general_shield	0.05
IndivQLearningSlugs/232_23_2	none		True	-10	False	GridWorld	SUNY	FullObsDiscrete	Individual_Q	1.0	0.05	2500000	2	True	IndivQLearningSlugs/232_23_2_none	none		0.05
IndivQLearningSlugs/233_23_3	none		True	-10	False	GridWorld	SUNY	FullObsDiscrete	Individual_Q	1.0	0.05	2500000	3	True	IndivQLearningSlugs/233_23_3_slugs_centralized	slugs_centralized	shields/general_shield	0.05
IndivQLearningSlugs/233_23_3	none		True	-10	False	GridWorld	SUNY	FullObsDiscrete	Individual_Q	1.0	0.05	2500000	3	True	IndivQLearningSlugs/233_23_3_slugs_decentralized	slugs_decentralized	shields/general_shield	0.05
IndivQLearningSlugs/233_23_3	none		True	-10	False	GridWorld	SUNY	FullObsDiscrete	Individual_Q	1.0	0.05	2500000	3	True	IndivQLearningSlugs/233_23_3_none	none		0.05
IndivQLearningSlugs/234_23_4	none		True	-10	False	GridWorld	SUNY	FullObsDiscrete	Individual_Q	1.0	0.05	2500000	4	True	IndivQLearningSlugs/234_23_4_slugs_centralized	slugs_centralized	shields/general_shield	0.05
IndivQLearningSlugs/234_23_4	none		True	-10	False	GridWorld	SUNY	FullObsDiscrete	Individual_Q	1.0	0.05	2500000	4	True	IndivQLearningSlugs/234_23_4_slugs_decentralized	slugs_decentralized	shields/general_shield	0.05
IndivQLearningSlugs/234_23_4	none		True	-10	False	GridWorld	SUNY	FullObsDiscrete	Individual_Q	1.0	0.05	2500000	4	True	IndivQLearningSlugs/234_23_4_none	none		0.05
IndivQLearningSlugs/235_23_5	none		True	-10	False	GridWorld	SUNY	FullObsDiscrete	Individual_Q	1.0	0.05	2500000	5	True	IndivQLearningSlugs/235_23_5_slugs_centralized	slugs_centralized	shields/general_shield	0.05
IndivQLearningSlugs/235_23_5	none		True	-10	False	GridWorld	SUNY	FullObsDiscrete	Individual_Q	1.0	0.05	2500000	5	True	IndivQLearningSlugs/235_23_5_slugs_decentralized	slugs_decentralized	shields/general_shield	0.05
IndivQLearningSlugs/235_23_5	none		True	-10	False	GridWorld	SUNY	FullObsDiscrete	Individual_Q	1.0	0.05	2500000	5	True	IndivQLearningSlugs/235_23_5_none	none		0.05
IndivQLearningSlugs/236_23_6	none		True	-10	False	GridWorld	SUNY	FullObsDiscrete	Individual_Q	1.0	0.05	2500000	6	True	IndivQLearningSlugs/236_23_6_slugs_centralized	slugs_centralized	shields/general_shield	0.05
IndivQLearningSlugs/236_23_6	none		True	-10	False	GridWorld	SUNY	FullObsDiscrete	Individual_Q	1.0	0.05	2500000	6	True	IndivQLearningSlugs/236_23_6_slugs_decentralized	slugs_decentralized	shields/general_shield	0.05
IndivQLearningSlugs/236_23_6	none		True	-10	False	GridWorld	SUNY	FullObsDiscrete	Individual_Q	1.0	0.05	2500000	6	True	IndivQLearningSlugs/236_23_6_none	none		0.05
IndivQLearningSlugs/237_23_7	none		True	-10	False	GridWorld	SUNY	FullObsDiscrete	Individual_Q	1.0	0.05	2500000	7	True	IndivQLearningSlugs/237_23_7_slugs_centralized	slugs_centralized	shields/general_shield	0.05
IndivQLearningSlugs/237_23_7	none		True	-10	False	GridWorld	SUNY	FullObsDiscrete	Individual_Q	1.0	0.05	2500000	7	True	IndivQLearningSlugs/237_23_7_slugs_decentralized	slugs_decentralized	shields/general_shield	0.05
IndivQLearningSlugs/237_23_7	none		True	-10	False	GridWorld	SUNY	FullObsDiscrete	Individual_Q	1.0	0.05	2500000	7	True	IndivQLearningSlugs/237_23_7_none	none		0.05
IndivQLearningSlugs/238_23_8	none		True	-10	False	GridWorld	SUNY	FullObsDiscrete	Individual_Q	1.0	0.05	2500000	8	True	IndivQLearningSlugs/238_23_8_slugs_centralized	slugs_centralized	shields/general_shield	0.05
IndivQLearningSlugs/238_23_8	none		True	-10	False	GridWorld	SUNY	FullObsDiscrete	Individual_Q	1.0	0.05	2500000	8	True	IndivQLearningSlugs/238_23_8_slugs_decentralized	slugs_decentralized	shields/general_shield	0.05
IndivQLearningSlugs/238_23_8	none		True	-10	False	GridWorld	SUNY	FullObsDiscrete	Individual_Q	1.0	0.05	2500000	8	True	IndivQLearningSlugs/238_23_8_none	none		0.05
IndivQLearningSlugs/239_23_9	none		True	-10	False	GridWorld	SUNY	FullObsDiscrete	Individual_Q	1.0	0.05	2500000	9	True	IndivQLearningSlugs/239_23_9_slugs_centralized	slugs_centralized	shields/general_shield	0.05
IndivQLearningSlugs/239_23_9	none		True	-10	False	GridWorld	SUNY	FullObsDiscrete	Individual_Q	1.0	0.05	2500000	9	True	IndivQLearningSlugs/239_23_9_slugs_decentralized	slugs_decentralized	shields/general_shield	0.05
IndivQLearningSlugs/239_23_9	none		True	-10	False	GridWorld	SUNY	FullObsDiscrete	Individual_Q	1.0	0.05	2500000	9	True	IndivQLearningSlugs/239_23_9_none	none		0.05
