# Supplementary material
Source: ML conference proceedings conference paper supplement (https://proceedings.neurips.cc/paper_files/paper/2022/hash/57444e14ecd9e2c8f603b4f012ce3811-Abstract.html)
Supplement: Supplementary file 1 [file 57444e14ecd9e2c8f603b4f012ce3811-Supplemental-Conference.zip › 3410_shield_decentralization_for_sa-Supplementary Material/parallel_configs/IndivQLearningSlugsTerminateOnCollisionEval.csv]

run_name	shield	shield_specification	punish_unsafe_orig_action	punish_unsafe_orig_action_modifier	shield_decentralized_random_agent_order	randomize_starts	map_type	grid_world_map_name	grid_world_obs_type	learner_type	learner_anneal_eps_start	learner_anneal_eps_finish	max_total_steps	grid_world_terminate_on_collision	seed	skip_training	evaluation_run_name	evaluation_shield	evaluation_shield_specification	evaluation_shield_decentralized_random_agent_order	learner_evaluation_epsilon
IndivQLearningSlugsTerminateOnCollision/0_0_0	slugs_centralized	shields/general_shield	True	-10		True	GridWorld	Pentagon	FullObsDiscrete	Individual_Q	1.0	0.05	2500000	True	0	True	IndivQLearningSlugsTerminateOnCollision/0_0_0_slugs_centralized	slugs_centralized	shields/general_shield		0.05
IndivQLearningSlugsTerminateOnCollision/0_0_0	slugs_centralized	shields/general_shield	True	-10		True	GridWorld	Pentagon	FullObsDiscrete	Individual_Q	1.0	0.05	2500000	True	0	True	IndivQLearningSlugsTerminateOnCollision/0_0_0_slugs_decentralized	slugs_decentralized	shields/general_shield	False	0.05
IndivQLearningSlugsTerminateOnCollision/0_0_0	slugs_centralized	shields/general_shield	True	-10		True	GridWorld	Pentagon	FullObsDiscrete	Individual_Q	1.0	0.05	2500000	True	0	True	IndivQLearningSlugsTerminateOnCollision/0_0_0_none	none			0.05
IndivQLearningSlugsTerminateOnCollision/1_0_1	slugs_centralized	shields/general_shield	True	-10		True	GridWorld	Pentagon	FullObsDiscrete	Individual_Q	1.0	0.05	2500000	True	1	True	IndivQLearningSlugsTerminateOnCollision/1_0_1_slugs_centralized	slugs_centralized	shields/general_shield		0.05
IndivQLearningSlugsTerminateOnCollision/1_0_1	slugs_centralized	shields/general_shield	True	-10		True	GridWorld	Pentagon	FullObsDiscrete	Individual_Q	1.0	0.05	2500000	True	1	True	IndivQLearningSlugsTerminateOnCollision/1_0_1_slugs_decentralized	slugs_decentralized	shields/general_shield	False	0.05
IndivQLearningSlugsTerminateOnCollision/1_0_1	slugs_centralized	shields/general_shield	True	-10		True	GridWorld	Pentagon	FullObsDiscrete	Individual_Q	1.0	0.05	2500000	True	1	True	IndivQLearningSlugsTerminateOnCollision/1_0_1_none	none			0.05
IndivQLearningSlugsTerminateOnCollision/2_0_2	slugs_centralized	shields/general_shield	True	-10		True	GridWorld	Pentagon	FullObsDiscrete	Individual_Q	1.0	0.05	2500000	True	2	True	IndivQLearningSlugsTerminateOnCollision/2_0_2_slugs_centralized	slugs_centralized	shields/general_shield		0.05
IndivQLearningSlugsTerminateOnCollision/2_0_2	slugs_centralized	shields/general_shield	True	-10		True	GridWorld	Pentagon	FullObsDiscrete	Individual_Q	1.0	0.05	2500000	True	2	True	IndivQLearningSlugsTerminateOnCollision/2_0_2_slugs_decentralized	slugs_decentralized	shields/general_shield	False	0.05
IndivQLearningSlugsTerminateOnCollision/2_0_2	slugs_centralized	shields/general_shield	True	-10		True	GridWorld	Pentagon	FullObsDiscrete	Individual_Q	1.0	0.05	2500000	True	2	True	IndivQLearningSlugsTerminateOnCollision/2_0_2_none	none			0.05
IndivQLearningSlugsTerminateOnCollision/3_0_3	slugs_centralized	shields/general_shield	True	-10		True	GridWorld	Pentagon	FullObsDiscrete	Individual_Q	1.0	0.05	2500000	True	3	True	IndivQLearningSlugsTerminateOnCollision/3_0_3_slugs_centralized	slugs_centralized	shields/general_shield		0.05
IndivQLearningSlugsTerminateOnCollision/3_0_3	slugs_centralized	shields/general_shield	True	-10		True	GridWorld	Pentagon	FullObsDiscrete	Individual_Q	1.0	0.05	2500000	True	3	True	IndivQLearningSlugsTerminateOnCollision/3_0_3_slugs_decentralized	slugs_decentralized	shields/general_shield	False	0.05
IndivQLearningSlugsTerminateOnCollision/3_0_3	slugs_centralized	shields/general_shield	True	-10		True	GridWorld	Pentagon	FullObsDiscrete	Individual_Q	1.0	0.05	2500000	True	3	True	IndivQLearningSlugsTerminateOnCollision/3_0_3_none	none			0.05
IndivQLearningSlugsTerminateOnCollision/4_0_4	slugs_centralized	shields/general_shield	True	-10		True	GridWorld	Pentagon	FullObsDiscrete	Individual_Q	1.0	0.05	2500000	True	4	True	IndivQLearningSlugsTerminateOnCollision/4_0_4_slugs_centralized	slugs_centralized	shields/general_shield		0.05
IndivQLearningSlugsTerminateOnCollision/4_0_4	slugs_centralized	shields/general_shield	True	-10		True	GridWorld	Pentagon	FullObsDiscrete	Individual_Q	1.0	0.05	2500000	True	4	True	IndivQLearningSlugsTerminateOnCollision/4_0_4_slugs_decentralized	slugs_decentralized	shields/general_shield	False	0.05
IndivQLearningSlugsTerminateOnCollision/4_0_4	slugs_centralized	shields/general_shield	True	-10		True	GridWorld	Pentagon	FullObsDiscrete	Individual_Q	1.0	0.05	2500000	True	4	True	IndivQLearningSlugsTerminateOnCollision/4_0_4_none	none			0.05
IndivQLearningSlugsTerminateOnCollision/5_0_5	slugs_centralized	shields/general_shield	True	-10		True	GridWorld	Pentagon	FullObsDiscrete	Individual_Q	1.0	0.05	2500000	True	5	True	IndivQLearningSlugsTerminateOnCollision/5_0_5_slugs_centralized	slugs_centralized	shields/general_shield		0.05
IndivQLearningSlugsTerminateOnCollision/5_0_5	slugs_centralized	shields/general_shield	True	-10		True	GridWorld	Pentagon	FullObsDiscrete	Individual_Q	1.0	0.05	2500000	True	5	True	IndivQLearningSlugsTerminateOnCollision/5_0_5_slugs_decentralized	slugs_decentralized	shields/general_shield	False	0.05
IndivQLearningSlugsTerminateOnCollision/5_0_5	slugs_centralized	shields/general_shield	True	-10		True	GridWorld	Pentagon	FullObsDiscrete	Individual_Q	1.0	0.05	2500000	True	5	True	IndivQLearningSlugsTerminateOnCollision/5_0_5_none	none			0.05
IndivQLearningSlugsTerminateOnCollision/6_0_6	slugs_centralized	shields/general_shield	True	-10		True	GridWorld	Pentagon	FullObsDiscrete	Individual_Q	1.0	0.05	2500000	True	6	True	IndivQLearningSlugsTerminateOnCollision/6_0_6_slugs_centralized	slugs_centralized	shields/general_shield		0.05
IndivQLearningSlugsTerminateOnCollision/6_0_6	slugs_centralized	shields/general_shield	True	-10		True	GridWorld	Pentagon	FullObsDiscrete	Individual_Q	1.0	0.05	2500000	True	6	True	IndivQLearningSlugsTerminateOnCollision/6_0_6_slugs_decentralized	slugs_decentralized	shields/general_shield	False	0.05
IndivQLearningSlugsTerminateOnCollision/6_0_6	slugs_centralized	shields/general_shield	True	-10		True	GridWorld	Pentagon	FullObsDiscrete	Individual_Q	1.0	0.05	2500000	True	6	True	IndivQLearningSlugsTerminateOnCollision/6_0_6_none	none			0.05
IndivQLearningSlugsTerminateOnCollision/7_0_7	slugs_centralized	shields/general_shield	True	-10		True	GridWorld	Pentagon	FullObsDiscrete	Individual_Q	1.0	0.05	2500000	True	7	True	IndivQLearningSlugsTerminateOnCollision/7_0_7_slugs_centralized	slugs_centralized	shields/general_shield		0.05
IndivQLearningSlugsTerminateOnCollision/7_0_7	slugs_centralized	shields/general_shield	True	-10		True	GridWorld	Pentagon	FullObsDiscrete	Individual_Q	1.0	0.05	2500000	True	7	True	IndivQLearningSlugsTerminateOnCollision/7_0_7_slugs_decentralized	slugs_decentralized	shields/general_shield	False	0.05
IndivQLearningSlugsTerminateOnCollision/7_0_7	slugs_centralized	shields/general_shield	True	-10		True	GridWorld	Pentagon	FullObsDiscrete	Individual_Q	1.0	0.05	2500000	True	7	True	IndivQLearningSlugsTerminateOnCollision/7_0_7_none	none			0.05
IndivQLearningSlugsTerminateOnCollision/8_0_8	slugs_centralized	shields/general_shield	True	-10		True	GridWorld	Pentagon	FullObsDiscrete	Individual_Q	1.0	0.05	2500000	True	8	True	IndivQLearningSlugsTerminateOnCollision/8_0_8_slugs_centralized	slugs_centralized	shields/general_shield		0.05
IndivQLearningSlugsTerminateOnCollision/8_0_8	slugs_centralized	shields/general_shield	True	-10		True	GridWorld	Pentagon	FullObsDiscrete	Individual_Q	1.0	0.05	2500000	True	8	True	IndivQLearningSlugsTerminateOnCollision/8_0_8_slugs_decentralized	slugs_decentralized	shields/general_shield	False	0.05
IndivQLearningSlugsTerminateOnCollision/8_0_8	slugs_centralized	shields/general_shield	True	-10		True	GridWorld	Pentagon	FullObsDiscrete	Individual_Q	1.0	0.05	2500000	True	8	True	IndivQLearningSlugsTerminateOnCollision/8_0_8_none	none			0.05
IndivQLearningSlugsTerminateOnCollision/9_0_9	slugs_centralized	shields/general_shield	True	-10		True	GridWorld	Pentagon	FullObsDiscrete	Individual_Q	1.0	0.05	2500000	True	9	True	IndivQLearningSlugsTerminateOnCollision/9_0_9_slugs_centralized	slugs_centralized	shields/general_shield		0.05
IndivQLearningSlugsTerminateOnCollision/9_0_9	slugs_centralized	shields/general_shield	True	-10		True	GridWorld	Pentagon	FullObsDiscrete	Individual_Q	1.0	0.05	2500000	True	9	True	IndivQLearningSlugsTerminateOnCollision/9_0_9_slugs_decentralized	slugs_decentralized	shields/general_shield	False	0.05
IndivQLearningSlugsTerminateOnCollision/9_0_9	slugs_centralized	shields/general_shield	True	-10		True	GridWorld	Pentagon	FullObsDiscrete	Individual_Q	1.0	0.05	2500000	True	9	True	IndivQLearningSlugsTerminateOnCollision/9_0_9_none	none			0.05
IndivQLearningSlugsTerminateOnCollision/10_1_0	slugs_decentralized	shields/general_shield	True	-10	False	True	GridWorld	Pentagon	FullObsDiscrete	Individual_Q	1.0	0.05	2500000	True	0	True	IndivQLearningSlugsTerminateOnCollision/10_1_0_slugs_centralized	slugs_centralized	shields/general_shield		0.05
IndivQLearningSlugsTerminateOnCollision/10_1_0	slugs_decentralized	shields/general_shield	True	-10	False	True	GridWorld	Pentagon	FullObsDiscrete	Individual_Q	1.0	0.05	2500000	True	0	True	IndivQLearningSlugsTerminateOnCollision/10_1_0_slugs_decentralized	slugs_decentralized	shields/general_shield	False	0.05
IndivQLearningSlugsTerminateOnCollision/10_1_0	slugs_decentralized	shields/general_shield	True	-10	False	True	GridWorld	Pentagon	FullObsDiscrete	Individual_Q	1.0	0.05	2500000	True	0	True	IndivQLearningSlugsTerminateOnCollision/10_1_0_none	none			0.05
IndivQLearningSlugsTerminateOnCollision/11_1_1	slugs_decentralized	shields/general_shield	True	-10	False	True	GridWorld	Pentagon	FullObsDiscrete	Individual_Q	1.0	0.05	2500000	True	1	True	IndivQLearningSlugsTerminateOnCollision/11_1_1_slugs_centralized	slugs_centralized	shields/general_shield		0.05
IndivQLearningSlugsTerminateOnCollision/11_1_1	slugs_decentralized	shields/general_shield	True	-10	False	True	GridWorld	Pentagon	FullObsDiscrete	Individual_Q	1.0	0.05	2500000	True	1	True	IndivQLearningSlugsTerminateOnCollision/11_1_1_slugs_decentralized	slugs_decentralized	shields/general_shield	False	0.05
IndivQLearningSlugsTerminateOnCollision/11_1_1	slugs_decentralized	shields/general_shield	True	-10	False	True	GridWorld	Pentagon	FullObsDiscrete	Individual_Q	1.0	0.05	2500000	True	1	True	IndivQLearningSlugsTerminateOnCollision/11_1_1_none	none			0.05
IndivQLearningSlugsTerminateOnCollision/12_1_2	slugs_decentralized	shields/general_shield	True	-10	False	True	GridWorld	Pentagon	FullObsDiscrete	Individual_Q	1.0	0.05	2500000	True	2	True	IndivQLearningSlugsTerminateOnCollision/12_1_2_slugs_centralized	slugs_centralized	shields/general_shield		0.05
IndivQLearningSlugsTerminateOnCollision/12_1_2	slugs_decentralized	shields/general_shield	True	-10	False	True	GridWorld	Pentagon	FullObsDiscrete	Individual_Q	1.0	0.05	2500000	True	2	True	IndivQLearningSlugsTerminateOnCollision/12_1_2_slugs_decentralized	slugs_decentralized	shields/general_shield	False	0.05
IndivQLearningSlugsTerminateOnCollision/12_1_2	slugs_decentralized	shields/general_shield	True	-10	False	True	GridWorld	Pentagon	FullObsDiscrete	Individual_Q	1.0	0.05	2500000	True	2	True	IndivQLearningSlugsTerminateOnCollision/12_1_2_none	none			0.05
IndivQLearningSlugsTerminateOnCollision/13_1_3	slugs_decentralized	shields/general_shield	True	-10	False	True	GridWorld	Pentagon	FullObsDiscrete	Individual_Q	1.0	0.05	2500000	True	3	True	IndivQLearningSlugsTerminateOnCollision/13_1_3_slugs_centralized	slugs_centralized	shields/general_shield		0.05
IndivQLearningSlugsTerminateOnCollision/13_1_3	slugs_decentralized	shields/general_shield	True	-10	False	True	GridWorld	Pentagon	FullObsDiscrete	Individual_Q	1.0	0.05	2500000	True	3	True	IndivQLearningSlugsTerminateOnCollision/13_1_3_slugs_decentralized	slugs_decentralized	shields/general_shield	False	0.05
IndivQLearningSlugsTerminateOnCollision/13_1_3	slugs_decentralized	shields/general_shield	True	-10	False	True	GridWorld	Pentagon	FullObsDiscrete	Individual_Q	1.0	0.05	2500000	True	3	True	IndivQLearningSlugsTerminateOnCollision/13_1_3_none	none			0.05
IndivQLearningSlugsTerminateOnCollision/14_1_4	slugs_decentralized	shields/general_shield	True	-10	False	True	GridWorld	Pentagon	FullObsDiscrete	Individual_Q	1.0	0.05	2500000	True	4	True	IndivQLearningSlugsTerminateOnCollision/14_1_4_slugs_centralized	slugs_centralized	shields/general_shield		0.05
IndivQLearningSlugsTerminateOnCollision/14_1_4	slugs_decentralized	shields/general_shield	True	-10	False	True	GridWorld	Pentagon	FullObsDiscrete	Individual_Q	1.0	0.05	2500000	True	4	True	IndivQLearningSlugsTerminateOnCollision/14_1_4_slugs_decentralized	slugs_decentralized	shields/general_shield	False	0.05
IndivQLearningSlugsTerminateOnCollision/14_1_4	slugs_decentralized	shields/general_shield	True	-10	False	True	GridWorld	Pentagon	FullObsDiscrete	Individual_Q	1.0	0.05	2500000	True	4	True	IndivQLearningSlugsTerminateOnCollision/14_1_4_none	none			0.05
IndivQLearningSlugsTerminateOnCollision/15_1_5	slugs_decentralized	shields/general_shield	True	-10	False	True	GridWorld	Pentagon	FullObsDiscrete	Individual_Q	1.0	0.05	2500000	True	5	True	IndivQLearningSlugsTerminateOnCollision/15_1_5_slugs_centralized	slugs_centralized	shields/general_shield		0.05
IndivQLearningSlugsTerminateOnCollision/15_1_5	slugs_decentralized	shields/general_shield	True	-10	False	True	GridWorld	Pentagon	FullObsDiscrete	Individual_Q	1.0	0.05	2500000	True	5	True	IndivQLearningSlugsTerminateOnCollision/15_1_5_slugs_decentralized	slugs_decentralized	shields/general_shield	False	0.05
IndivQLearningSlugsTerminateOnCollision/15_1_5	slugs_decentralized	shields/general_shield	True	-10	False	True	GridWorld	Pentagon	FullObsDiscrete	Individual_Q	1.0	0.05	2500000	True	5	True	IndivQLearningSlugsTerminateOnCollision/15_1_5_none	none			0.05
IndivQLearningSlugsTerminateOnCollision/16_1_6	slugs_decentralized	shields/general_shield	True	-10	False	True	GridWorld	Pentagon	FullObsDiscrete	Individual_Q	1.0	0.05	2500000	True	6	True	IndivQLearningSlugsTerminateOnCollision/16_1_6_slugs_centralized	slugs_centralized	shields/general_shield		0.05
IndivQLearningSlugsTerminateOnCollision/16_1_6	slugs_decentralized	shields/general_shield	True	-10	False	True	GridWorld	Pentagon	FullObsDiscrete	Individual_Q	1.0	0.05	2500000	True	6	True	IndivQLearningSlugsTerminateOnCollision/16_1_6_slugs_decentralized	slugs_decentralized	shields/general_shield	False	0.05
IndivQLearningSlugsTerminateOnCollision/16_1_6	slugs_decentralized	shields/general_shield	True	-10	False	True	GridWorld	Pentagon	FullObsDiscrete	Individual_Q	1.0	0.05	2500000	True	6	True	IndivQLearningSlugsTerminateOnCollision/16_1_6_none	none			0.05
IndivQLearningSlugsTerminateOnCollision/17_1_7	slugs_decentralized	shields/general_shield	True	-10	False	True	GridWorld	Pentagon	FullObsDiscrete	Individual_Q	1.0	0.05	2500000	True	7	True	IndivQLearningSlugsTerminateOnCollision/17_1_7_slugs_centralized	slugs_centralized	shields/general_shield		0.05
IndivQLearningSlugsTerminateOnCollision/17_1_7	slugs_decentralized	shields/general_shield	True	-10	False	True	GridWorld	Pentagon	FullObsDiscrete	Individual_Q	1.0	0.05	2500000	True	7	True	IndivQLearningSlugsTerminateOnCollision/17_1_7_slugs_decentralized	slugs_decentralized	shields/general_shield	False	0.05
IndivQLearningSlugsTerminateOnCollision/17_1_7	slugs_decentralized	shields/general_shield	True	-10	False	True	GridWorld	Pentagon	FullObsDiscrete	Individual_Q	1.0	0.05	2500000	True	7	True	IndivQLearningSlugsTerminateOnCollision/17_1_7_none	none			0.05
IndivQLearningSlugsTerminateOnCollision/18_1_8	slugs_decentralized	shields/general_shield	True	-10	False	True	GridWorld	Pentagon	FullObsDiscrete	Individual_Q	1.0	0.05	2500000	True	8	True	IndivQLearningSlugsTerminateOnCollision/18_1_8_slugs_centralized	slugs_centralized	shields/general_shield		0.05
IndivQLearningSlugsTerminateOnCollision/18_1_8	slugs_decentralized	shields/general_shield	True	-10	False	True	GridWorld	Pentagon	FullObsDiscrete	Individual_Q	1.0	0.05	2500000	True	8	True	IndivQLearningSlugsTerminateOnCollision/18_1_8_slugs_decentralized	slugs_decentralized	shields/general_shield	False	0.05
IndivQLearningSlugsTerminateOnCollision/18_1_8	slugs_decentralized	shields/general_shield	True	-10	False	True	GridWorld	Pentagon	FullObsDiscrete	Individual_Q	1.0	0.05	2500000	True	8	True	IndivQLearningSlugsTerminateOnCollision/18_1_8_none	none			0.05
IndivQLearningSlugsTerminateOnCollision/19_1_9	slugs_decentralized	shields/general_shield	True	-10	False	True	GridWorld	Pentagon	FullObsDiscrete	Individual_Q	1.0	0.05	2500000	True	9	True	IndivQLearningSlugsTerminateOnCollision/19_1_9_slugs_centralized	slugs_centralized	shields/general_shield		0.05
IndivQLearningSlugsTerminateOnCollision/19_1_9	slugs_decentralized	shields/general_shield	True	-10	False	True	GridWorld	Pentagon	FullObsDiscrete	Individual_Q	1.0	0.05	2500000	True	9	True	IndivQLearningSlugsTerminateOnCollision/19_1_9_slugs_decentralized	slugs_decentralized	shields/general_shield	False	0.05
IndivQLearningSlugsTerminateOnCollision/19_1_9	slugs_decentralized	shields/general_shield	True	-10	False	True	GridWorld	Pentagon	FullObsDiscrete	Individual_Q	1.0	0.05	2500000	True	9	True	IndivQLearningSlugsTerminateOnCollision/19_1_9_none	none			0.05
IndivQLearningSlugsTerminateOnCollision/20_2_0	none		True	-10		True	GridWorld	Pentagon	FullObsDiscrete	Individual_Q	1.0	0.05	2500000	True	0	True	IndivQLearningSlugsTerminateOnCollision/20_2_0_slugs_centralized	slugs_centralized	shields/general_shield		0.05
IndivQLearningSlugsTerminateOnCollision/20_2_0	none		True	-10		True	GridWorld	Pentagon	FullObsDiscrete	Individual_Q	1.0	0.05	2500000	True	0	True	IndivQLearningSlugsTerminateOnCollision/20_2_0_slugs_decentralized	slugs_decentralized	shields/general_shield	False	0.05
IndivQLearningSlugsTerminateOnCollision/20_2_0	none		True	-10		True	GridWorld	Pentagon	FullObsDiscrete	Individual_Q	1.0	0.05	2500000	True	0	True	IndivQLearningSlugsTerminateOnCollision/20_2_0_none	none			0.05
IndivQLearningSlugsTerminateOnCollision/21_2_1	none		True	-10		True	GridWorld	Pentagon	FullObsDiscrete	Individual_Q	1.0	0.05	2500000	True	1	True	IndivQLearningSlugsTerminateOnCollision/21_2_1_slugs_centralized	slugs_centralized	shields/general_shield		0.05
IndivQLearningSlugsTerminateOnCollision/21_2_1	none		True	-10		True	GridWorld	Pentagon	FullObsDiscrete	Individual_Q	1.0	0.05	2500000	True	1	True	IndivQLearningSlugsTerminateOnCollision/21_2_1_slugs_decentralized	slugs_decentralized	shields/general_shield	False	0.05
IndivQLearningSlugsTerminateOnCollision/21_2_1	none		True	-10		True	GridWorld	Pentagon	FullObsDiscrete	Individual_Q	1.0	0.05	2500000	True	1	True	IndivQLearningSlugsTerminateOnCollision/21_2_1_none	none			0.05
IndivQLearningSlugsTerminateOnCollision/22_2_2	none		True	-10		True	GridWorld	Pentagon	FullObsDiscrete	Individual_Q	1.0	0.05	2500000	True	2	True	IndivQLearningSlugsTerminateOnCollision/22_2_2_slugs_centralized	slugs_centralized	shields/general_shield		0.05
IndivQLearningSlugsTerminateOnCollision/22_2_2	none		True	-10		True	GridWorld	Pentagon	FullObsDiscrete	Individual_Q	1.0	0.05	2500000	True	2	True	IndivQLearningSlugsTerminateOnCollision/22_2_2_slugs_decentralized	slugs_decentralized	shields/general_shield	False	0.05
IndivQLearningSlugsTerminateOnCollision/22_2_2	none		True	-10		True	GridWorld	Pentagon	FullObsDiscrete	Individual_Q	1.0	0.05	2500000	True	2	True	IndivQLearningSlugsTerminateOnCollision/22_2_2_none	none			0.05
IndivQLearningSlugsTerminateOnCollision/23_2_3	none		True	-10		True	GridWorld	Pentagon	FullObsDiscrete	Individual_Q	1.0	0.05	2500000	True	3	True	IndivQLearningSlugsTerminateOnCollision/23_2_3_slugs_centralized	slugs_centralized	shields/general_shield		0.05
IndivQLearningSlugsTerminateOnCollision/23_2_3	none		True	-10		True	GridWorld	Pentagon	FullObsDiscrete	Individual_Q	1.0	0.05	2500000	True	3	True	IndivQLearningSlugsTerminateOnCollision/23_2_3_slugs_decentralized	slugs_decentralized	shields/general_shield	False	0.05
IndivQLearningSlugsTerminateOnCollision/23_2_3	none		True	-10		True	GridWorld	Pentagon	FullObsDiscrete	Individual_Q	1.0	0.05	2500000	True	3	True	IndivQLearningSlugsTerminateOnCollision/23_2_3_none	none			0.05
IndivQLearningSlugsTerminateOnCollision/24_2_4	none		True	-10		True	GridWorld	Pentagon	FullObsDiscrete	Individual_Q	1.0	0.05	2500000	True	4	True	IndivQLearningSlugsTerminateOnCollision/24_2_4_slugs_centralized	slugs_centralized	shields/general_shield		0.05
IndivQLearningSlugsTerminateOnCollision/24_2_4	none		True	-10		True	GridWorld	Pentagon	FullObsDiscrete	Individual_Q	1.0	0.05	2500000	True	4	True	IndivQLearningSlugsTerminateOnCollision/24_2_4_slugs_decentralized	slugs_decentralized	shields/general_shield	False	0.05
IndivQLearningSlugsTerminateOnCollision/24_2_4	none		True	-10		True	GridWorld	Pentagon	FullObsDiscrete	Individual_Q	1.0	0.05	2500000	True	4	True	IndivQLearningSlugsTerminateOnCollision/24_2_4_none	none			0.05
IndivQLearningSlugsTerminateOnCollision/25_2_5	none		True	-10		True	GridWorld	Pentagon	FullObsDiscrete	Individual_Q	1.0	0.05	2500000	True	5	True	IndivQLearningSlugsTerminateOnCollision/25_2_5_slugs_centralized	slugs_centralized	shields/general_shield		0.05
IndivQLearningSlugsTerminateOnCollision/25_2_5	none		True	-10		True	GridWorld	Pentagon	FullObsDiscrete	Individual_Q	1.0	0.05	2500000	True	5	True	IndivQLearningSlugsTerminateOnCollision/25_2_5_slugs_decentralized	slugs_decentralized	shields/general_shield	False	0.05
IndivQLearningSlugsTerminateOnCollision/25_2_5	none		True	-10		True	GridWorld	Pentagon	FullObsDiscrete	Individual_Q	1.0	0.05	2500000	True	5	True	IndivQLearningSlugsTerminateOnCollision/25_2_5_none	none			0.05
IndivQLearningSlugsTerminateOnCollision/26_2_6	none		True	-10		True	GridWorld	Pentagon	FullObsDiscrete	Individual_Q	1.0	0.05	2500000	True	6	True	IndivQLearningSlugsTerminateOnCollision/26_2_6_slugs_centralized	slugs_centralized	shields/general_shield		0.05
IndivQLearningSlugsTerminateOnCollision/26_2_6	none		True	-10		True	GridWorld	Pentagon	FullObsDiscrete	Individual_Q	1.0	0.05	2500000	True	6	True	IndivQLearningSlugsTerminateOnCollision/26_2_6_slugs_decentralized	slugs_decentralized	shields/general_shield	False	0.05
IndivQLearningSlugsTerminateOnCollision/26_2_6	none		True	-10		True	GridWorld	Pentagon	FullObsDiscrete	Individual_Q	1.0	0.05	2500000	True	6	True	IndivQLearningSlugsTerminateOnCollision/26_2_6_none	none			0.05
IndivQLearningSlugsTerminateOnCollision/27_2_7	none		True	-10		True	GridWorld	Pentagon	FullObsDiscrete	Individual_Q	1.0	0.05	2500000	True	7	True	IndivQLearningSlugsTerminateOnCollision/27_2_7_slugs_centralized	slugs_centralized	shields/general_shield		0.05
IndivQLearningSlugsTerminateOnCollision/27_2_7	none		True	-10		True	GridWorld	Pentagon	FullObsDiscrete	Individual_Q	1.0	0.05	2500000	True	7	True	IndivQLearningSlugsTerminateOnCollision/27_2_7_slugs_decentralized	slugs_decentralized	shields/general_shield	False	0.05
IndivQLearningSlugsTerminateOnCollision/27_2_7	none		True	-10		True	GridWorld	Pentagon	FullObsDiscrete	Individual_Q	1.0	0.05	2500000	True	7	True	IndivQLearningSlugsTerminateOnCollision/27_2_7_none	none			0.05
IndivQLearningSlugsTerminateOnCollision/28_2_8	none		True	-10		True	GridWorld	Pentagon	FullObsDiscrete	Individual_Q	1.0	0.05	2500000	True	8	True	IndivQLearningSlugsTerminateOnCollision/28_2_8_slugs_centralized	slugs_centralized	shields/general_shield		0.05
IndivQLearningSlugsTerminateOnCollision/28_2_8	none		True	-10		True	GridWorld	Pentagon	FullObsDiscrete	Individual_Q	1.0	0.05	2500000	True	8	True	IndivQLearningSlugsTerminateOnCollision/28_2_8_slugs_decentralized	slugs_decentralized	shields/general_shield	False	0.05
IndivQLearningSlugsTerminateOnCollision/28_2_8	none		True	-10		True	GridWorld	Pentagon	FullObsDiscrete	Individual_Q	1.0	0.05	2500000	True	8	True	IndivQLearningSlugsTerminateOnCollision/28_2_8_none	none			0.05
IndivQLearningSlugsTerminateOnCollision/29_2_9	none		True	-10		True	GridWorld	Pentagon	FullObsDiscrete	Individual_Q	1.0	0.05	2500000	True	9	True	IndivQLearningSlugsTerminateOnCollision/29_2_9_slugs_centralized	slugs_centralized	shields/general_shield		0.05
IndivQLearningSlugsTerminateOnCollision/29_2_9	none		True	-10		True	GridWorld	Pentagon	FullObsDiscrete	Individual_Q	1.0	0.05	2500000	True	9	True	IndivQLearningSlugsTerminateOnCollision/29_2_9_slugs_decentralized	slugs_decentralized	shields/general_shield	False	0.05
IndivQLearningSlugsTerminateOnCollision/29_2_9	none		True	-10		True	GridWorld	Pentagon	FullObsDiscrete	Individual_Q	1.0	0.05	2500000	True	9	True	IndivQLearningSlugsTerminateOnCollision/29_2_9_none	none			0.05
IndivQLearningSlugsTerminateOnCollision/30_3_0	slugs_centralized	shields/general_shield	True	-10		False	GridWorld	Pentagon	FullObsDiscrete	Individual_Q	1.0	0.05	2500000	True	0	True	IndivQLearningSlugsTerminateOnCollision/30_3_0_slugs_centralized	slugs_centralized	shields/general_shield		0.05
IndivQLearningSlugsTerminateOnCollision/30_3_0	slugs_centralized	shields/general_shield	True	-10		False	GridWorld	Pentagon	FullObsDiscrete	Individual_Q	1.0	0.05	2500000	True	0	True	IndivQLearningSlugsTerminateOnCollision/30_3_0_slugs_decentralized	slugs_decentralized	shields/general_shield	False	0.05
IndivQLearningSlugsTerminateOnCollision/30_3_0	slugs_centralized	shields/general_shield	True	-10		False	GridWorld	Pentagon	FullObsDiscrete	Individual_Q	1.0	0.05	2500000	True	0	True	IndivQLearningSlugsTerminateOnCollision/30_3_0_none	none			0.05
IndivQLearningSlugsTerminateOnCollision/31_3_1	slugs_centralized	shields/general_shield	True	-10		False	GridWorld	Pentagon	FullObsDiscrete	Individual_Q	1.0	0.05	2500000	True	1	True	IndivQLearningSlugsTerminateOnCollision/31_3_1_slugs_centralized	slugs_centralized	shields/general_shield		0.05
IndivQLearningSlugsTerminateOnCollision/31_3_1	slugs_centralized	shields/general_shield	True	-10		False	GridWorld	Pentagon	FullObsDiscrete	Individual_Q	1.0	0.05	2500000	True	1	True	IndivQLearningSlugsTerminateOnCollision/31_3_1_slugs_decentralized	slugs_decentralized	shields/general_shield	False	0.05
IndivQLearningSlugsTerminateOnCollision/31_3_1	slugs_centralized	shields/general_shield	True	-10		False	GridWorld	Pentagon	FullObsDiscrete	Individual_Q	1.0	0.05	2500000	True	1	True	IndivQLearningSlugsTerminateOnCollision/31_3_1_none	none			0.05
IndivQLearningSlugsTerminateOnCollision/32_3_2	slugs_centralized	shields/general_shield	True	-10		False	GridWorld	Pentagon	FullObsDiscrete	Individual_Q	1.0	0.05	2500000	True	2	True	IndivQLearningSlugsTerminateOnCollision/32_3_2_slugs_centralized	slugs_centralized	shields/general_shield		0.05
IndivQLearningSlugsTerminateOnCollision/32_3_2	slugs_centralized	shields/general_shield	True	-10		False	GridWorld	Pentagon	FullObsDiscrete	Individual_Q	1.0	0.05	2500000	True	2	True	IndivQLearningSlugsTerminateOnCollision/32_3_2_slugs_decentralized	slugs_decentralized	shields/general_shield	False	0.05
IndivQLearningSlugsTerminateOnCollision/32_3_2	slugs_centralized	shields/general_shield	True	-10		False	GridWorld	Pentagon	FullObsDiscrete	Individual_Q	1.0	0.05	2500000	True	2	True	IndivQLearningSlugsTerminateOnCollision/32_3_2_none	none			0.05
IndivQLearningSlugsTerminateOnCollision/33_3_3	slugs_centralized	shields/general_shield	True	-10		False	GridWorld	Pentagon	FullObsDiscrete	Individual_Q	1.0	0.05	2500000	True	3	True	IndivQLearningSlugsTerminateOnCollision/33_3_3_slugs_centralized	slugs_centralized	shields/general_shield		0.05
IndivQLearningSlugsTerminateOnCollision/33_3_3	slugs_centralized	shields/general_shield	True	-10		False	GridWorld	Pentagon	FullObsDiscrete	Individual_Q	1.0	0.05	2500000	True	3	True	IndivQLearningSlugsTerminateOnCollision/33_3_3_slugs_decentralized	slugs_decentralized	shields/general_shield	False	0.05
IndivQLearningSlugsTerminateOnCollision/33_3_3	slugs_centralized	shields/general_shield	True	-10		False	GridWorld	Pentagon	FullObsDiscrete	Individual_Q	1.0	0.05	2500000	True	3	True	IndivQLearningSlugsTerminateOnCollision/33_3_3_none	none			0.05
IndivQLearningSlugsTerminateOnCollision/34_3_4	slugs_centralized	shields/general_shield	True	-10		False	GridWorld	Pentagon	FullObsDiscrete	Individual_Q	1.0	0.05	2500000	True	4	True	IndivQLearningSlugsTerminateOnCollision/34_3_4_slugs_centralized	slugs_centralized	shields/general_shield		0.05
IndivQLearningSlugsTerminateOnCollision/34_3_4	slugs_centralized	shields/general_shield	True	-10		False	GridWorld	Pentagon	FullObsDiscrete	Individual_Q	1.0	0.05	2500000	True	4	True	IndivQLearningSlugsTerminateOnCollision/34_3_4_slugs_decentralized	slugs_decentralized	shields/general_shield	False	0.05
IndivQLearningSlugsTerminateOnCollision/34_3_4	slugs_centralized	shields/general_shield	True	-10		False	GridWorld	Pentagon	FullObsDiscrete	Individual_Q	1.0	0.05	2500000	True	4	True	IndivQLearningSlugsTerminateOnCollision/34_3_4_none	none			0.05
IndivQLearningSlugsTerminateOnCollision/35_3_5	slugs_centralized	shields/general_shield	True	-10		False	GridWorld	Pentagon	FullObsDiscrete	Individual_Q	1.0	0.05	2500000	True	5	True	IndivQLearningSlugsTerminateOnCollision/35_3_5_slugs_centralized	slugs_centralized	shields/general_shield		0.05
IndivQLearningSlugsTerminateOnCollision/35_3_5	slugs_centralized	shields/general_shield	True	-10		False	GridWorld	Pentagon	FullObsDiscrete	Individual_Q	1.0	0.05	2500000	True	5	True	IndivQLearningSlugsTerminateOnCollision/35_3_5_slugs_decentralized	slugs_decentralized	shields/general_shield	False	0.05
IndivQLearningSlugsTerminateOnCollision/35_3_5	slugs_centralized	shields/general_shield	True	-10		False	GridWorld	Pentagon	FullObsDiscrete	Individual_Q	1.0	0.05	2500000	True	5	True	IndivQLearningSlugsTerminateOnCollision/35_3_5_none	none			0.05
IndivQLearningSlugsTerminateOnCollision/36_3_6	slugs_centralized	shields/general_shield	True	-10		False	GridWorld	Pentagon	FullObsDiscrete	Individual_Q	1.0	0.05	2500000	True	6	True	IndivQLearningSlugsTerminateOnCollision/36_3_6_slugs_centralized	slugs_centralized	shields/general_shield		0.05
IndivQLearningSlugsTerminateOnCollision/36_3_6	slugs_centralized	shields/general_shield	True	-10		False	GridWorld	Pentagon	FullObsDiscrete	Individual_Q	1.0	0.05	2500000	True	6	True	IndivQLearningSlugsTerminateOnCollision/36_3_6_slugs_decentralized	slugs_decentralized	shields/general_shield	False	0.05
IndivQLearningSlugsTerminateOnCollision/36_3_6	slugs_centralized	shields/general_shield	True	-10		False	GridWorld	Pentagon	FullObsDiscrete	Individual_Q	1.0	0.05	2500000	True	6	True	IndivQLearningSlugsTerminateOnCollision/36_3_6_none	none			0.05
IndivQLearningSlugsTerminateOnCollision/37_3_7	slugs_centralized	shields/general_shield	True	-10		False	GridWorld	Pentagon	FullObsDiscrete	Individual_Q	1.0	0.05	2500000	True	7	True	IndivQLearningSlugsTerminateOnCollision/37_3_7_slugs_centralized	slugs_centralized	shields/general_shield		0.05
IndivQLearningSlugsTerminateOnCollision/37_3_7	slugs_centralized	shields/general_shield	True	-10		False	GridWorld	Pentagon	FullObsDiscrete	Individual_Q	1.0	0.05	2500000	True	7	True	IndivQLearningSlugsTerminateOnCollision/37_3_7_slugs_decentralized	slugs_decentralized	shields/general_shield	False	0.05
IndivQLearningSlugsTerminateOnCollision/37_3_7	slugs_centralized	shields/general_shield	True	-10		False	GridWorld	Pentagon	FullObsDiscrete	Individual_Q	1.0	0.05	2500000	True	7	True	IndivQLearningSlugsTerminateOnCollision/37_3_7_none	none			0.05
IndivQLearningSlugsTerminateOnCollision/38_3_8	slugs_centralized	shields/general_shield	True	-10		False	GridWorld	Pentagon	FullObsDiscrete	Individual_Q	1.0	0.05	2500000	True	8	True	IndivQLearningSlugsTerminateOnCollision/38_3_8_slugs_centralized	slugs_centralized	shields/general_shield		0.05
IndivQLearningSlugsTerminateOnCollision/38_3_8	slugs_centralized	shields/general_shield	True	-10		False	GridWorld	Pentagon	FullObsDiscrete	Individual_Q	1.0	0.05	2500000	True	8	True	IndivQLearningSlugsTerminateOnCollision/38_3_8_slugs_decentralized	slugs_decentralized	shields/general_shield	False	0.05
IndivQLearningSlugsTerminateOnCollision/38_3_8	slugs_centralized	shields/general_shield	True	-10		False	GridWorld	Pentagon	FullObsDiscrete	Individual_Q	1.0	0.05	2500000	True	8	True	IndivQLearningSlugsTerminateOnCollision/38_3_8_none	none			0.05
IndivQLearningSlugsTerminateOnCollision/39_3_9	slugs_centralized	shields/general_shield	True	-10		False	GridWorld	Pentagon	FullObsDiscrete	Individual_Q	1.0	0.05	2500000	True	9	True	IndivQLearningSlugsTerminateOnCollision/39_3_9_slugs_centralized	slugs_centralized	shields/general_shield		0.05
IndivQLearningSlugsTerminateOnCollision/39_3_9	slugs_centralized	shields/general_shield	True	-10		False	GridWorld	Pentagon	FullObsDiscrete	Individual_Q	1.0	0.05	2500000	True	9	True	IndivQLearningSlugsTerminateOnCollision/39_3_9_slugs_decentralized	slugs_decentralized	shields/general_shield	False	0.05
IndivQLearningSlugsTerminateOnCollision/39_3_9	slugs_centralized	shields/general_shield	True	-10		False	GridWorld	Pentagon	FullObsDiscrete	Individual_Q	1.0	0.05	2500000	True	9	True	IndivQLearningSlugsTerminateOnCollision/39_3_9_none	none			0.05
IndivQLearningSlugsTerminateOnCollision/40_4_0	slugs_decentralized	shields/general_shield	True	-10	False	False	GridWorld	Pentagon	FullObsDiscrete	Individual_Q	1.0	0.05	2500000	True	0	True	IndivQLearningSlugsTerminateOnCollision/40_4_0_slugs_centralized	slugs_centralized	shields/general_shield		0.05
IndivQLearningSlugsTerminateOnCollision/40_4_0	slugs_decentralized	shields/general_shield	True	-10	False	False	GridWorld	Pentagon	FullObsDiscrete	Individual_Q	1.0	0.05	2500000	True	0	True	IndivQLearningSlugsTerminateOnCollision/40_4_0_slugs_decentralized	slugs_decentralized	shields/general_shield	False	0.05
IndivQLearningSlugsTerminateOnCollision/40_4_0	slugs_decentralized	shields/general_shield	True	-10	False	False	GridWorld	Pentagon	FullObsDiscrete	Individual_Q	1.0	0.05	2500000	True	0	True	IndivQLearningSlugsTerminateOnCollision/40_4_0_none	none			0.05
IndivQLearningSlugsTerminateOnCollision/41_4_1	slugs_decentralized	shields/general_shield	True	-10	False	False	GridWorld	Pentagon	FullObsDiscrete	Individual_Q	1.0	0.05	2500000	True	1	True	IndivQLearningSlugsTerminateOnCollision/41_4_1_slugs_centralized	slugs_centralized	shields/general_shield		0.05
IndivQLearningSlugsTerminateOnCollision/41_4_1	slugs_decentralized	shields/general_shield	True	-10	False	False	GridWorld	Pentagon	FullObsDiscrete	Individual_Q	1.0	0.05	2500000	True	1	True	IndivQLearningSlugsTerminateOnCollision/41_4_1_slugs_decentralized	slugs_decentralized	shields/general_shield	False	0.05
IndivQLearningSlugsTerminateOnCollision/41_4_1	slugs_decentralized	shields/general_shield	True	-10	False	False	GridWorld	Pentagon	FullObsDiscrete	Individual_Q	1.0	0.05	2500000	True	1	True	IndivQLearningSlugsTerminateOnCollision/41_4_1_none	none			0.05
IndivQLearningSlugsTerminateOnCollision/42_4_2	slugs_decentralized	shields/general_shield	True	-10	False	False	GridWorld	Pentagon	FullObsDiscrete	Individual_Q	1.0	0.05	2500000	True	2	True	IndivQLearningSlugsTerminateOnCollision/42_4_2_slugs_centralized	slugs_centralized	shields/general_shield		0.05
IndivQLearningSlugsTerminateOnCollision/42_4_2	slugs_decentralized	shields/general_shield	True	-10	False	False	GridWorld	Pentagon	FullObsDiscrete	Individual_Q	1.0	0.05	2500000	True	2	True	IndivQLearningSlugsTerminateOnCollision/42_4_2_slugs_decentralized	slugs_decentralized	shields/general_shield	False	0.05
IndivQLearningSlugsTerminateOnCollision/42_4_2	slugs_decentralized	shields/general_shield	True	-10	False	False	GridWorld	Pentagon	FullObsDiscrete	Individual_Q	1.0	0.05	2500000	True	2	True	IndivQLearningSlugsTerminateOnCollision/42_4_2_none	none			0.05
IndivQLearningSlugsTerminateOnCollision/43_4_3	slugs_decentralized	shields/general_shield	True	-10	False	False	GridWorld	Pentagon	FullObsDiscrete	Individual_Q	1.0	0.05	2500000	True	3	True	IndivQLearningSlugsTerminateOnCollision/43_4_3_slugs_centralized	slugs_centralized	shields/general_shield		0.05
IndivQLearningSlugsTerminateOnCollision/43_4_3	slugs_decentralized	shields/general_shield	True	-10	False	False	GridWorld	Pentagon	FullObsDiscrete	Individual_Q	1.0	0.05	2500000	True	3	True	IndivQLearningSlugsTerminateOnCollision/43_4_3_slugs_decentralized	slugs_decentralized	shields/general_shield	False	0.05
IndivQLearningSlugsTerminateOnCollision/43_4_3	slugs_decentralized	shields/general_shield	True	-10	False	False	GridWorld	Pentagon	FullObsDiscrete	Individual_Q	1.0	0.05	2500000	True	3	True	IndivQLearningSlugsTerminateOnCollision/43_4_3_none	none			0.05
IndivQLearningSlugsTerminateOnCollision/44_4_4	slugs_decentralized	shields/general_shield	True	-10	False	False	GridWorld	Pentagon	FullObsDiscrete	Individual_Q	1.0	0.05	2500000	True	4	True	IndivQLearningSlugsTerminateOnCollision/44_4_4_slugs_centralized	slugs_centralized	shields/general_shield		0.05
IndivQLearningSlugsTerminateOnCollision/44_4_4	slugs_decentralized	shields/general_shield	True	-10	False	False	GridWorld	Pentagon	FullObsDiscrete	Individual_Q	1.0	0.05	2500000	True	4	True	IndivQLearningSlugsTerminateOnCollision/44_4_4_slugs_decentralized	slugs_decentralized	shields/general_shield	False	0.05
IndivQLearningSlugsTerminateOnCollision/44_4_4	slugs_decentralized	shields/general_shield	True	-10	False	False	GridWorld	Pentagon	FullObsDiscrete	Individual_Q	1.0	0.05	2500000	True	4	True	IndivQLearningSlugsTerminateOnCollision/44_4_4_none	none			0.05
IndivQLearningSlugsTerminateOnCollision/45_4_5	slugs_decentralized	shields/general_shield	True	-10	False	False	GridWorld	Pentagon	FullObsDiscrete	Individual_Q	1.0	0.05	2500000	True	5	True	IndivQLearningSlugsTerminateOnCollision/45_4_5_slugs_centralized	slugs_centralized	shields/general_shield		0.05
IndivQLearningSlugsTerminateOnCollision/45_4_5	slugs_decentralized	shields/general_shield	True	-10	False	False	GridWorld	Pentagon	FullObsDiscrete	Individual_Q	1.0	0.05	2500000	True	5	True	IndivQLearningSlugsTerminateOnCollision/45_4_5_slugs_decentralized	slugs_decentralized	shields/general_shield	False	0.05
IndivQLearningSlugsTerminateOnCollision/45_4_5	slugs_decentralized	shields/general_shield	True	-10	False	False	GridWorld	Pentagon	FullObsDiscrete	Individual_Q	1.0	0.05	2500000	True	5	True	IndivQLearningSlugsTerminateOnCollision/45_4_5_none	none			0.05
IndivQLearningSlugsTerminateOnCollision/46_4_6	slugs_decentralized	shields/general_shield	True	-10	False	False	GridWorld	Pentagon	FullObsDiscrete	Individual_Q	1.0	0.05	2500000	True	6	True	IndivQLearningSlugsTerminateOnCollision/46_4_6_slugs_centralized	slugs_centralized	shields/general_shield		0.05
IndivQLearningSlugsTerminateOnCollision/46_4_6	slugs_decentralized	shields/general_shield	True	-10	False	False	GridWorld	Pentagon	FullObsDiscrete	Individual_Q	1.0	0.05	2500000	True	6	True	IndivQLearningSlugsTerminateOnCollision/46_4_6_slugs_decentralized	slugs_decentralized	shields/general_shield	False	0.05
IndivQLearningSlugsTerminateOnCollision/46_4_6	slugs_decentralized	shields/general_shield	True	-10	False	False	GridWorld	Pentagon	FullObsDiscrete	Individual_Q	1.0	0.05	2500000	True	6	True	IndivQLearningSlugsTerminateOnCollision/46_4_6_none	none			0.05
IndivQLearningSlugsTerminateOnCollision/47_4_7	slugs_decentralized	shields/general_shield	True	-10	False	False	GridWorld	Pentagon	FullObsDiscrete	Individual_Q	1.0	0.05	2500000	True	7	True	IndivQLearningSlugsTerminateOnCollision/47_4_7_slugs_centralized	slugs_centralized	shields/general_shield		0.05
IndivQLearningSlugsTerminateOnCollision/47_4_7	slugs_decentralized	shields/general_shield	True	-10	False	False	GridWorld	Pentagon	FullObsDiscrete	Individual_Q	1.0	0.05	2500000	True	7	True	IndivQLearningSlugsTerminateOnCollision/47_4_7_slugs_decentralized	slugs_decentralized	shields/general_shield	False	0.05
IndivQLearningSlugsTerminateOnCollision/47_4_7	slugs_decentralized	shields/general_shield	True	-10	False	False	GridWorld	Pentagon	FullObsDiscrete	Individual_Q	1.0	0.05	2500000	True	7	True	IndivQLearningSlugsTerminateOnCollision/47_4_7_none	none			0.05
IndivQLearningSlugsTerminateOnCollision/48_4_8	slugs_decentralized	shields/general_shield	True	-10	False	False	GridWorld	Pentagon	FullObsDiscrete	Individual_Q	1.0	0.05	2500000	True	8	True	IndivQLearningSlugsTerminateOnCollision/48_4_8_slugs_centralized	slugs_centralized	shields/general_shield		0.05
IndivQLearningSlugsTerminateOnCollision/48_4_8	slugs_decentralized	shields/general_shield	True	-10	False	False	GridWorld	Pentagon	FullObsDiscrete	Individual_Q	1.0	0.05	2500000	True	8	True	IndivQLearningSlugsTerminateOnCollision/48_4_8_slugs_decentralized	slugs_decentralized	shields/general_shield	False	0.05
IndivQLearningSlugsTerminateOnCollision/48_4_8	slugs_decentralized	shields/general_shield	True	-10	False	False	GridWorld	Pentagon	FullObsDiscrete	Individual_Q	1.0	0.05	2500000	True	8	True	IndivQLearningSlugsTerminateOnCollision/48_4_8_none	none			0.05
IndivQLearningSlugsTerminateOnCollision/49_4_9	slugs_decentralized	shields/general_shield	True	-10	False	False	GridWorld	Pentagon	FullObsDiscrete	Individual_Q	1.0	0.05	2500000	True	9	True	IndivQLearningSlugsTerminateOnCollision/49_4_9_slugs_centralized	slugs_centralized	shields/general_shield		0.05
IndivQLearningSlugsTerminateOnCollision/49_4_9	slugs_decentralized	shields/general_shield	True	-10	False	False	GridWorld	Pentagon	FullObsDiscrete	Individual_Q	1.0	0.05	2500000	True	9	True	IndivQLearningSlugsTerminateOnCollision/49_4_9_slugs_decentralized	slugs_decentralized	shields/general_shield	False	0.05
IndivQLearningSlugsTerminateOnCollision/49_4_9	slugs_decentralized	shields/general_shield	True	-10	False	False	GridWorld	Pentagon	FullObsDiscrete	Individual_Q	1.0	0.05	2500000	True	9	True	IndivQLearningSlugsTerminateOnCollision/49_4_9_none	none			0.05
IndivQLearningSlugsTerminateOnCollision/50_5_0	none		True	-10		False	GridWorld	Pentagon	FullObsDiscrete	Individual_Q	1.0	0.05	2500000	True	0	True	IndivQLearningSlugsTerminateOnCollision/50_5_0_slugs_centralized	slugs_centralized	shields/general_shield		0.05
IndivQLearningSlugsTerminateOnCollision/50_5_0	none		True	-10		False	GridWorld	Pentagon	FullObsDiscrete	Individual_Q	1.0	0.05	2500000	True	0	True	IndivQLearningSlugsTerminateOnCollision/50_5_0_slugs_decentralized	slugs_decentralized	shields/general_shield	False	0.05
IndivQLearningSlugsTerminateOnCollision/50_5_0	none		True	-10		False	GridWorld	Pentagon	FullObsDiscrete	Individual_Q	1.0	0.05	2500000	True	0	True	IndivQLearningSlugsTerminateOnCollision/50_5_0_none	none			0.05
IndivQLearningSlugsTerminateOnCollision/51_5_1	none		True	-10		False	GridWorld	Pentagon	FullObsDiscrete	Individual_Q	1.0	0.05	2500000	True	1	True	IndivQLearningSlugsTerminateOnCollision/51_5_1_slugs_centralized	slugs_centralized	shields/general_shield		0.05
IndivQLearningSlugsTerminateOnCollision/51_5_1	none		True	-10		False	GridWorld	Pentagon	FullObsDiscrete	Individual_Q	1.0	0.05	2500000	True	1	True	IndivQLearningSlugsTerminateOnCollision/51_5_1_slugs_decentralized	slugs_decentralized	shields/general_shield	False	0.05
IndivQLearningSlugsTerminateOnCollision/51_5_1	none		True	-10		False	GridWorld	Pentagon	FullObsDiscrete	Individual_Q	1.0	0.05	2500000	True	1	True	IndivQLearningSlugsTerminateOnCollision/51_5_1_none	none			0.05
IndivQLearningSlugsTerminateOnCollision/52_5_2	none		True	-10		False	GridWorld	Pentagon	FullObsDiscrete	Individual_Q	1.0	0.05	2500000	True	2	True	IndivQLearningSlugsTerminateOnCollision/52_5_2_slugs_centralized	slugs_centralized	shields/general_shield		0.05
IndivQLearningSlugsTerminateOnCollision/52_5_2	none		True	-10		False	GridWorld	Pentagon	FullObsDiscrete	Individual_Q	1.0	0.05	2500000	True	2	True	IndivQLearningSlugsTerminateOnCollision/52_5_2_slugs_decentralized	slugs_decentralized	shields/general_shield	False	0.05
IndivQLearningSlugsTerminateOnCollision/52_5_2	none		True	-10		False	GridWorld	Pentagon	FullObsDiscrete	Individual_Q	1.0	0.05	2500000	True	2	True	IndivQLearningSlugsTerminateOnCollision/52_5_2_none	none			0.05
IndivQLearningSlugsTerminateOnCollision/53_5_3	none		True	-10		False	GridWorld	Pentagon	FullObsDiscrete	Individual_Q	1.0	0.05	2500000	True	3	True	IndivQLearningSlugsTerminateOnCollision/53_5_3_slugs_centralized	slugs_centralized	shields/general_shield		0.05
IndivQLearningSlugsTerminateOnCollision/53_5_3	none		True	-10		False	GridWorld	Pentagon	FullObsDiscrete	Individual_Q	1.0	0.05	2500000	True	3	True	IndivQLearningSlugsTerminateOnCollision/53_5_3_slugs_decentralized	slugs_decentralized	shields/general_shield	False	0.05
IndivQLearningSlugsTerminateOnCollision/53_5_3	none		True	-10		False	GridWorld	Pentagon	FullObsDiscrete	Individual_Q	1.0	0.05	2500000	True	3	True	IndivQLearningSlugsTerminateOnCollision/53_5_3_none	none			0.05
IndivQLearningSlugsTerminateOnCollision/54_5_4	none		True	-10		False	GridWorld	Pentagon	FullObsDiscrete	Individual_Q	1.0	0.05	2500000	True	4	True	IndivQLearningSlugsTerminateOnCollision/54_5_4_slugs_centralized	slugs_centralized	shields/general_shield		0.05
IndivQLearningSlugsTerminateOnCollision/54_5_4	none		True	-10		False	GridWorld	Pentagon	FullObsDiscrete	Individual_Q	1.0	0.05	2500000	True	4	True	IndivQLearningSlugsTerminateOnCollision/54_5_4_slugs_decentralized	slugs_decentralized	shields/general_shield	False	0.05
IndivQLearningSlugsTerminateOnCollision/54_5_4	none		True	-10		False	GridWorld	Pentagon	FullObsDiscrete	Individual_Q	1.0	0.05	2500000	True	4	True	IndivQLearningSlugsTerminateOnCollision/54_5_4_none	none			0.05
IndivQLearningSlugsTerminateOnCollision/55_5_5	none		True	-10		False	GridWorld	Pentagon	FullObsDiscrete	Individual_Q	1.0	0.05	2500000	True	5	True	IndivQLearningSlugsTerminateOnCollision/55_5_5_slugs_centralized	slugs_centralized	shields/general_shield		0.05
IndivQLearningSlugsTerminateOnCollision/55_5_5	none		True	-10		False	GridWorld	Pentagon	FullObsDiscrete	Individual_Q	1.0	0.05	2500000	True	5	True	IndivQLearningSlugsTerminateOnCollision/55_5_5_slugs_decentralized	slugs_decentralized	shields/general_shield	False	0.05
IndivQLearningSlugsTerminateOnCollision/55_5_5	none		True	-10		False	GridWorld	Pentagon	FullObsDiscrete	Individual_Q	1.0	0.05	2500000	True	5	True	IndivQLearningSlugsTerminateOnCollision/55_5_5_none	none			0.05
IndivQLearningSlugsTerminateOnCollision/56_5_6	none		True	-10		False	GridWorld	Pentagon	FullObsDiscrete	Individual_Q	1.0	0.05	2500000	True	6	True	IndivQLearningSlugsTerminateOnCollision/56_5_6_slugs_centralized	slugs_centralized	shields/general_shield		0.05
IndivQLearningSlugsTerminateOnCollision/56_5_6	none		True	-10		False	GridWorld	Pentagon	FullObsDiscrete	Individual_Q	1.0	0.05	2500000	True	6	True	IndivQLearningSlugsTerminateOnCollision/56_5_6_slugs_decentralized	slugs_decentralized	shields/general_shield	False	0.05
IndivQLearningSlugsTerminateOnCollision/56_5_6	none		True	-10		False	GridWorld	Pentagon	FullObsDiscrete	Individual_Q	1.0	0.05	2500000	True	6	True	IndivQLearningSlugsTerminateOnCollision/56_5_6_none	none			0.05
IndivQLearningSlugsTerminateOnCollision/57_5_7	none		True	-10		False	GridWorld	Pentagon	FullObsDiscrete	Individual_Q	1.0	0.05	2500000	True	7	True	IndivQLearningSlugsTerminateOnCollision/57_5_7_slugs_centralized	slugs_centralized	shields/general_shield		0.05
IndivQLearningSlugsTerminateOnCollision/57_5_7	none		True	-10		False	GridWorld	Pentagon	FullObsDiscrete	Individual_Q	1.0	0.05	2500000	True	7	True	IndivQLearningSlugsTerminateOnCollision/57_5_7_slugs_decentralized	slugs_decentralized	shields/general_shield	False	0.05
IndivQLearningSlugsTerminateOnCollision/57_5_7	none		True	-10		False	GridWorld	Pentagon	FullObsDiscrete	Individual_Q	1.0	0.05	2500000	True	7	True	IndivQLearningSlugsTerminateOnCollision/57_5_7_none	none			0.05
IndivQLearningSlugsTerminateOnCollision/58_5_8	none		True	-10		False	GridWorld	Pentagon	FullObsDiscrete	Individual_Q	1.0	0.05	2500000	True	8	True	IndivQLearningSlugsTerminateOnCollision/58_5_8_slugs_centralized	slugs_centralized	shields/general_shield		0.05
IndivQLearningSlugsTerminateOnCollision/58_5_8	none		True	-10		False	GridWorld	Pentagon	FullObsDiscrete	Individual_Q	1.0	0.05	2500000	True	8	True	IndivQLearningSlugsTerminateOnCollision/58_5_8_slugs_decentralized	slugs_decentralized	shields/general_shield	False	0.05
IndivQLearningSlugsTerminateOnCollision/58_5_8	none		True	-10		False	GridWorld	Pentagon	FullObsDiscrete	Individual_Q	1.0	0.05	2500000	True	8	True	IndivQLearningSlugsTerminateOnCollision/58_5_8_none	none			0.05
IndivQLearningSlugsTerminateOnCollision/59_5_9	none		True	-10		False	GridWorld	Pentagon	FullObsDiscrete	Individual_Q	1.0	0.05	2500000	True	9	True	IndivQLearningSlugsTerminateOnCollision/59_5_9_slugs_centralized	slugs_centralized	shields/general_shield		0.05
IndivQLearningSlugsTerminateOnCollision/59_5_9	none		True	-10		False	GridWorld	Pentagon	FullObsDiscrete	Individual_Q	1.0	0.05	2500000	True	9	True	IndivQLearningSlugsTerminateOnCollision/59_5_9_slugs_decentralized	slugs_decentralized	shields/general_shield	False	0.05
IndivQLearningSlugsTerminateOnCollision/59_5_9	none		True	-10		False	GridWorld	Pentagon	FullObsDiscrete	Individual_Q	1.0	0.05	2500000	True	9	True	IndivQLearningSlugsTerminateOnCollision/59_5_9_none	none			0.05
IndivQLearningSlugsTerminateOnCollision/60_6_0	slugs_centralized	shields/general_shield	True	-10		True	GridWorld	ISR	FullObsDiscrete	Individual_Q	1.0	0.05	2500000	True	0	True	IndivQLearningSlugsTerminateOnCollision/60_6_0_slugs_centralized	slugs_centralized	shields/general_shield		0.05
IndivQLearningSlugsTerminateOnCollision/60_6_0	slugs_centralized	shields/general_shield	True	-10		True	GridWorld	ISR	FullObsDiscrete	Individual_Q	1.0	0.05	2500000	True	0	True	IndivQLearningSlugsTerminateOnCollision/60_6_0_slugs_decentralized	slugs_decentralized	shields/general_shield	False	0.05
IndivQLearningSlugsTerminateOnCollision/60_6_0	slugs_centralized	shields/general_shield	True	-10		True	GridWorld	ISR	FullObsDiscrete	Individual_Q	1.0	0.05	2500000	True	0	True	IndivQLearningSlugsTerminateOnCollision/60_6_0_none	none			0.05
IndivQLearningSlugsTerminateOnCollision/61_6_1	slugs_centralized	shields/general_shield	True	-10		True	GridWorld	ISR	FullObsDiscrete	Individual_Q	1.0	0.05	2500000	True	1	True	IndivQLearningSlugsTerminateOnCollision/61_6_1_slugs_centralized	slugs_centralized	shields/general_shield		0.05
IndivQLearningSlugsTerminateOnCollision/61_6_1	slugs_centralized	shields/general_shield	True	-10		True	GridWorld	ISR	FullObsDiscrete	Individual_Q	1.0	0.05	2500000	True	1	True	IndivQLearningSlugsTerminateOnCollision/61_6_1_slugs_decentralized	slugs_decentralized	shields/general_shield	False	0.05
IndivQLearningSlugsTerminateOnCollision/61_6_1	slugs_centralized	shields/general_shield	True	-10		True	GridWorld	ISR	FullObsDiscrete	Individual_Q	1.0	0.05	2500000	True	1	True	IndivQLearningSlugsTerminateOnCollision/61_6_1_none	none			0.05
IndivQLearningSlugsTerminateOnCollision/62_6_2	slugs_centralized	shields/general_shield	True	-10		True	GridWorld	ISR	FullObsDiscrete	Individual_Q	1.0	0.05	2500000	True	2	True	IndivQLearningSlugsTerminateOnCollision/62_6_2_slugs_centralized	slugs_centralized	shields/general_shield		0.05
IndivQLearningSlugsTerminateOnCollision/62_6_2	slugs_centralized	shields/general_shield	True	-10		True	GridWorld	ISR	FullObsDiscrete	Individual_Q	1.0	0.05	2500000	True	2	True	IndivQLearningSlugsTerminateOnCollision/62_6_2_slugs_decentralized	slugs_decentralized	shields/general_shield	False	0.05
IndivQLearningSlugsTerminateOnCollision/62_6_2	slugs_centralized	shields/general_shield	True	-10		True	GridWorld	ISR	FullObsDiscrete	Individual_Q	1.0	0.05	2500000	True	2	True	IndivQLearningSlugsTerminateOnCollision/62_6_2_none	none			0.05
IndivQLearningSlugsTerminateOnCollision/63_6_3	slugs_centralized	shields/general_shield	True	-10		True	GridWorld	ISR	FullObsDiscrete	Individual_Q	1.0	0.05	2500000	True	3	True	IndivQLearningSlugsTerminateOnCollision/63_6_3_slugs_centralized	slugs_centralized	shields/general_shield		0.05
IndivQLearningSlugsTerminateOnCollision/63_6_3	slugs_centralized	shields/general_shield	True	-10		True	GridWorld	ISR	FullObsDiscrete	Individual_Q	1.0	0.05	2500000	True	3	True	IndivQLearningSlugsTerminateOnCollision/63_6_3_slugs_decentralized	slugs_decentralized	shields/general_shield	False	0.05
IndivQLearningSlugsTerminateOnCollision/63_6_3	slugs_centralized	shields/general_shield	True	-10		True	GridWorld	ISR	FullObsDiscrete	Individual_Q	1.0	0.05	2500000	True	3	True	IndivQLearningSlugsTerminateOnCollision/63_6_3_none	none			0.05
IndivQLearningSlugsTerminateOnCollision/64_6_4	slugs_centralized	shields/general_shield	True	-10		True	GridWorld	ISR	FullObsDiscrete	Individual_Q	1.0	0.05	2500000	True	4	True	IndivQLearningSlugsTerminateOnCollision/64_6_4_slugs_centralized	slugs_centralized	shields/general_shield		0.05
IndivQLearningSlugsTerminateOnCollision/64_6_4	slugs_centralized	shields/general_shield	True	-10		True	GridWorld	ISR	FullObsDiscrete	Individual_Q	1.0	0.05	2500000	True	4	True	IndivQLearningSlugsTerminateOnCollision/64_6_4_slugs_decentralized	slugs_decentralized	shields/general_shield	False	0.05
IndivQLearningSlugsTerminateOnCollision/64_6_4	slugs_centralized	shields/general_shield	True	-10		True	GridWorld	ISR	FullObsDiscrete	Individual_Q	1.0	0.05	2500000	True	4	True	IndivQLearningSlugsTerminateOnCollision/64_6_4_none	none			0.05
IndivQLearningSlugsTerminateOnCollision/65_6_5	slugs_centralized	shields/general_shield	True	-10		True	GridWorld	ISR	FullObsDiscrete	Individual_Q	1.0	0.05	2500000	True	5	True	IndivQLearningSlugsTerminateOnCollision/65_6_5_slugs_centralized	slugs_centralized	shields/general_shield		0.05
IndivQLearningSlugsTerminateOnCollision/65_6_5	slugs_centralized	shields/general_shield	True	-10		True	GridWorld	ISR	FullObsDiscrete	Individual_Q	1.0	0.05	2500000	True	5	True	IndivQLearningSlugsTerminateOnCollision/65_6_5_slugs_decentralized	slugs_decentralized	shields/general_shield	False	0.05
IndivQLearningSlugsTerminateOnCollision/65_6_5	slugs_centralized	shields/general_shield	True	-10		True	GridWorld	ISR	FullObsDiscrete	Individual_Q	1.0	0.05	2500000	True	5	True	IndivQLearningSlugsTerminateOnCollision/65_6_5_none	none			0.05
IndivQLearningSlugsTerminateOnCollision/66_6_6	slugs_centralized	shields/general_shield	True	-10		True	GridWorld	ISR	FullObsDiscrete	Individual_Q	1.0	0.05	2500000	True	6	True	IndivQLearningSlugsTerminateOnCollision/66_6_6_slugs_centralized	slugs_centralized	shields/general_shield		0.05
IndivQLearningSlugsTerminateOnCollision/66_6_6	slugs_centralized	shields/general_shield	True	-10		True	GridWorld	ISR	FullObsDiscrete	Individual_Q	1.0	0.05	2500000	True	6	True	IndivQLearningSlugsTerminateOnCollision/66_6_6_slugs_decentralized	slugs_decentralized	shields/general_shield	False	0.05
IndivQLearningSlugsTerminateOnCollision/66_6_6	slugs_centralized	shields/general_shield	True	-10		True	GridWorld	ISR	FullObsDiscrete	Individual_Q	1.0	0.05	2500000	True	6	True	IndivQLearningSlugsTerminateOnCollision/66_6_6_none	none			0.05
IndivQLearningSlugsTerminateOnCollision/67_6_7	slugs_centralized	shields/general_shield	True	-10		True	GridWorld	ISR	FullObsDiscrete	Individual_Q	1.0	0.05	2500000	True	7	True	IndivQLearningSlugsTerminateOnCollision/67_6_7_slugs_centralized	slugs_centralized	shields/general_shield		0.05
IndivQLearningSlugsTerminateOnCollision/67_6_7	slugs_centralized	shields/general_shield	True	-10		True	GridWorld	ISR	FullObsDiscrete	Individual_Q	1.0	0.05	2500000	True	7	True	IndivQLearningSlugsTerminateOnCollision/67_6_7_slugs_decentralized	slugs_decentralized	shields/general_shield	False	0.05
IndivQLearningSlugsTerminateOnCollision/67_6_7	slugs_centralized	shields/general_shield	True	-10		True	GridWorld	ISR	FullObsDiscrete	Individual_Q	1.0	0.05	2500000	True	7	True	IndivQLearningSlugsTerminateOnCollision/67_6_7_none	none			0.05
IndivQLearningSlugsTerminateOnCollision/68_6_8	slugs_centralized	shields/general_shield	True	-10		True	GridWorld	ISR	FullObsDiscrete	Individual_Q	1.0	0.05	2500000	True	8	True	IndivQLearningSlugsTerminateOnCollision/68_6_8_slugs_centralized	slugs_centralized	shields/general_shield		0.05
IndivQLearningSlugsTerminateOnCollision/68_6_8	slugs_centralized	shields/general_shield	True	-10		True	GridWorld	ISR	FullObsDiscrete	Individual_Q	1.0	0.05	2500000	True	8	True	IndivQLearningSlugsTerminateOnCollision/68_6_8_slugs_decentralized	slugs_decentralized	shields/general_shield	False	0.05
IndivQLearningSlugsTerminateOnCollision/68_6_8	slugs_centralized	shields/general_shield	True	-10		True	GridWorld	ISR	FullObsDiscrete	Individual_Q	1.0	0.05	2500000	True	8	True	IndivQLearningSlugsTerminateOnCollision/68_6_8_none	none			0.05
IndivQLearningSlugsTerminateOnCollision/69_6_9	slugs_centralized	shields/general_shield	True	-10		True	GridWorld	ISR	FullObsDiscrete	Individual_Q	1.0	0.05	2500000	True	9	True	IndivQLearningSlugsTerminateOnCollision/69_6_9_slugs_centralized	slugs_centralized	shields/general_shield		0.05
IndivQLearningSlugsTerminateOnCollision/69_6_9	slugs_centralized	shields/general_shield	True	-10		True	GridWorld	ISR	FullObsDiscrete	Individual_Q	1.0	0.05	2500000	True	9	True	IndivQLearningSlugsTerminateOnCollision/69_6_9_slugs_decentralized	slugs_decentralized	shields/general_shield	False	0.05
IndivQLearningSlugsTerminateOnCollision/69_6_9	slugs_centralized	shields/general_shield	True	-10		True	GridWorld	ISR	FullObsDiscrete	Individual_Q	1.0	0.05	2500000	True	9	True	IndivQLearningSlugsTerminateOnCollision/69_6_9_none	none			0.05
IndivQLearningSlugsTerminateOnCollision/70_7_0	slugs_decentralized	shields/general_shield	True	-10	False	True	GridWorld	ISR	FullObsDiscrete	Individual_Q	1.0	0.05	2500000	True	0	True	IndivQLearningSlugsTerminateOnCollision/70_7_0_slugs_centralized	slugs_centralized	shields/general_shield		0.05
IndivQLearningSlugsTerminateOnCollision/70_7_0	slugs_decentralized	shields/general_shield	True	-10	False	True	GridWorld	ISR	FullObsDiscrete	Individual_Q	1.0	0.05	2500000	True	0	True	IndivQLearningSlugsTerminateOnCollision/70_7_0_slugs_decentralized	slugs_decentralized	shields/general_shield	False	0.05
IndivQLearningSlugsTerminateOnCollision/70_7_0	slugs_decentralized	shields/general_shield	True	-10	False	True	GridWorld	ISR	FullObsDiscrete	Individual_Q	1.0	0.05	2500000	True	0	True	IndivQLearningSlugsTerminateOnCollision/70_7_0_none	none			0.05
IndivQLearningSlugsTerminateOnCollision/71_7_1	slugs_decentralized	shields/general_shield	True	-10	False	True	GridWorld	ISR	FullObsDiscrete	Individual_Q	1.0	0.05	2500000	True	1	True	IndivQLearningSlugsTerminateOnCollision/71_7_1_slugs_centralized	slugs_centralized	shields/general_shield		0.05
IndivQLearningSlugsTerminateOnCollision/71_7_1	slugs_decentralized	shields/general_shield	True	-10	False	True	GridWorld	ISR	FullObsDiscrete	Individual_Q	1.0	0.05	2500000	True	1	True	IndivQLearningSlugsTerminateOnCollision/71_7_1_slugs_decentralized	slugs_decentralized	shields/general_shield	False	0.05
IndivQLearningSlugsTerminateOnCollision/71_7_1	slugs_decentralized	shields/general_shield	True	-10	False	True	GridWorld	ISR	FullObsDiscrete	Individual_Q	1.0	0.05	2500000	True	1	True	IndivQLearningSlugsTerminateOnCollision/71_7_1_none	none			0.05
IndivQLearningSlugsTerminateOnCollision/72_7_2	slugs_decentralized	shields/general_shield	True	-10	False	True	GridWorld	ISR	FullObsDiscrete	Individual_Q	1.0	0.05	2500000	True	2	True	IndivQLearningSlugsTerminateOnCollision/72_7_2_slugs_centralized	slugs_centralized	shields/general_shield		0.05
IndivQLearningSlugsTerminateOnCollision/72_7_2	slugs_decentralized	shields/general_shield	True	-10	False	True	GridWorld	ISR	FullObsDiscrete	Individual_Q	1.0	0.05	2500000	True	2	True	IndivQLearningSlugsTerminateOnCollision/72_7_2_slugs_decentralized	slugs_decentralized	shields/general_shield	False	0.05
IndivQLearningSlugsTerminateOnCollision/72_7_2	slugs_decentralized	shields/general_shield	True	-10	False	True	GridWorld	ISR	FullObsDiscrete	Individual_Q	1.0	0.05	2500000	True	2	True	IndivQLearningSlugsTerminateOnCollision/72_7_2_none	none			0.05
IndivQLearningSlugsTerminateOnCollision/73_7_3	slugs_decentralized	shields/general_shield	True	-10	False	True	GridWorld	ISR	FullObsDiscrete	Individual_Q	1.0	0.05	2500000	True	3	True	IndivQLearningSlugsTerminateOnCollision/73_7_3_slugs_centralized	slugs_centralized	shields/general_shield		0.05
IndivQLearningSlugsTerminateOnCollision/73_7_3	slugs_decentralized	shields/general_shield	True	-10	False	True	GridWorld	ISR	FullObsDiscrete	Individual_Q	1.0	0.05	2500000	True	3	True	IndivQLearningSlugsTerminateOnCollision/73_7_3_slugs_decentralized	slugs_decentralized	shields/general_shield	False	0.05
IndivQLearningSlugsTerminateOnCollision/73_7_3	slugs_decentralized	shields/general_shield	True	-10	False	True	GridWorld	ISR	FullObsDiscrete	Individual_Q	1.0	0.05	2500000	True	3	True	IndivQLearningSlugsTerminateOnCollision/73_7_3_none	none			0.05
IndivQLearningSlugsTerminateOnCollision/74_7_4	slugs_decentralized	shields/general_shield	True	-10	False	True	GridWorld	ISR	FullObsDiscrete	Individual_Q	1.0	0.05	2500000	True	4	True	IndivQLearningSlugsTerminateOnCollision/74_7_4_slugs_centralized	slugs_centralized	shields/general_shield		0.05
IndivQLearningSlugsTerminateOnCollision/74_7_4	slugs_decentralized	shields/general_shield	True	-10	False	True	GridWorld	ISR	FullObsDiscrete	Individual_Q	1.0	0.05	2500000	True	4	True	IndivQLearningSlugsTerminateOnCollision/74_7_4_slugs_decentralized	slugs_decentralized	shields/general_shield	False	0.05
IndivQLearningSlugsTerminateOnCollision/74_7_4	slugs_decentralized	shields/general_shield	True	-10	False	True	GridWorld	ISR	FullObsDiscrete	Individual_Q	1.0	0.05	2500000	True	4	True	IndivQLearningSlugsTerminateOnCollision/74_7_4_none	none			0.05
IndivQLearningSlugsTerminateOnCollision/75_7_5	slugs_decentralized	shields/general_shield	True	-10	False	True	GridWorld	ISR	FullObsDiscrete	Individual_Q	1.0	0.05	2500000	True	5	True	IndivQLearningSlugsTerminateOnCollision/75_7_5_slugs_centralized	slugs_centralized	shields/general_shield		0.05
IndivQLearningSlugsTerminateOnCollision/75_7_5	slugs_decentralized	shields/general_shield	True	-10	False	True	GridWorld	ISR	FullObsDiscrete	Individual_Q	1.0	0.05	2500000	True	5	True	IndivQLearningSlugsTerminateOnCollision/75_7_5_slugs_decentralized	slugs_decentralized	shields/general_shield	False	0.05
IndivQLearningSlugsTerminateOnCollision/75_7_5	slugs_decentralized	shields/general_shield	True	-10	False	True	GridWorld	ISR	FullObsDiscrete	Individual_Q	1.0	0.05	2500000	True	5	True	IndivQLearningSlugsTerminateOnCollision/75_7_5_none	none			0.05
IndivQLearningSlugsTerminateOnCollision/76_7_6	slugs_decentralized	shields/general_shield	True	-10	False	True	GridWorld	ISR	FullObsDiscrete	Individual_Q	1.0	0.05	2500000	True	6	True	IndivQLearningSlugsTerminateOnCollision/76_7_6_slugs_centralized	slugs_centralized	shields/general_shield		0.05
IndivQLearningSlugsTerminateOnCollision/76_7_6	slugs_decentralized	shields/general_shield	True	-10	False	True	GridWorld	ISR	FullObsDiscrete	Individual_Q	1.0	0.05	2500000	True	6	True	IndivQLearningSlugsTerminateOnCollision/76_7_6_slugs_decentralized	slugs_decentralized	shields/general_shield	False	0.05
IndivQLearningSlugsTerminateOnCollision/76_7_6	slugs_decentralized	shields/general_shield	True	-10	False	True	GridWorld	ISR	FullObsDiscrete	Individual_Q	1.0	0.05	2500000	True	6	True	IndivQLearningSlugsTerminateOnCollision/76_7_6_none	none			0.05
IndivQLearningSlugsTerminateOnCollision/77_7_7	slugs_decentralized	shields/general_shield	True	-10	False	True	GridWorld	ISR	FullObsDiscrete	Individual_Q	1.0	0.05	2500000	True	7	True	IndivQLearningSlugsTerminateOnCollision/77_7_7_slugs_centralized	slugs_centralized	shields/general_shield		0.05
IndivQLearningSlugsTerminateOnCollision/77_7_7	slugs_decentralized	shields/general_shield	True	-10	False	True	GridWorld	ISR	FullObsDiscrete	Individual_Q	1.0	0.05	2500000	True	7	True	IndivQLearningSlugsTerminateOnCollision/77_7_7_slugs_decentralized	slugs_decentralized	shields/general_shield	False	0.05
IndivQLearningSlugsTerminateOnCollision/77_7_7	slugs_decentralized	shields/general_shield	True	-10	False	True	GridWorld	ISR	FullObsDiscrete	Individual_Q	1.0	0.05	2500000	True	7	True	IndivQLearningSlugsTerminateOnCollision/77_7_7_none	none			0.05
IndivQLearningSlugsTerminateOnCollision/78_7_8	slugs_decentralized	shields/general_shield	True	-10	False	True	GridWorld	ISR	FullObsDiscrete	Individual_Q	1.0	0.05	2500000	True	8	True	IndivQLearningSlugsTerminateOnCollision/78_7_8_slugs_centralized	slugs_centralized	shields/general_shield		0.05
IndivQLearningSlugsTerminateOnCollision/78_7_8	slugs_decentralized	shields/general_shield	True	-10	False	True	GridWorld	ISR	FullObsDiscrete	Individual_Q	1.0	0.05	2500000	True	8	True	IndivQLearningSlugsTerminateOnCollision/78_7_8_slugs_decentralized	slugs_decentralized	shields/general_shield	False	0.05
IndivQLearningSlugsTerminateOnCollision/78_7_8	slugs_decentralized	shields/general_shield	True	-10	False	True	GridWorld	ISR	FullObsDiscrete	Individual_Q	1.0	0.05	2500000	True	8	True	IndivQLearningSlugsTerminateOnCollision/78_7_8_none	none			0.05
IndivQLearningSlugsTerminateOnCollision/79_7_9	slugs_decentralized	shields/general_shield	True	-10	False	True	GridWorld	ISR	FullObsDiscrete	Individual_Q	1.0	0.05	2500000	True	9	True	IndivQLearningSlugsTerminateOnCollision/79_7_9_slugs_centralized	slugs_centralized	shields/general_shield		0.05
IndivQLearningSlugsTerminateOnCollision/79_7_9	slugs_decentralized	shields/general_shield	True	-10	False	True	GridWorld	ISR	FullObsDiscrete	Individual_Q	1.0	0.05	2500000	True	9	True	IndivQLearningSlugsTerminateOnCollision/79_7_9_slugs_decentralized	slugs_decentralized	shields/general_shield	False	0.05
IndivQLearningSlugsTerminateOnCollision/79_7_9	slugs_decentralized	shields/general_shield	True	-10	False	True	GridWorld	ISR	FullObsDiscrete	Individual_Q	1.0	0.05	2500000	True	9	True	IndivQLearningSlugsTerminateOnCollision/79_7_9_none	none			0.05
IndivQLearningSlugsTerminateOnCollision/80_8_0	none		True	-10		True	GridWorld	ISR	FullObsDiscrete	Individual_Q	1.0	0.05	2500000	True	0	True	IndivQLearningSlugsTerminateOnCollision/80_8_0_slugs_centralized	slugs_centralized	shields/general_shield		0.05
IndivQLearningSlugsTerminateOnCollision/80_8_0	none		True	-10		True	GridWorld	ISR	FullObsDiscrete	Individual_Q	1.0	0.05	2500000	True	0	True	IndivQLearningSlugsTerminateOnCollision/80_8_0_slugs_decentralized	slugs_decentralized	shields/general_shield	False	0.05
IndivQLearningSlugsTerminateOnCollision/80_8_0	none		True	-10		True	GridWorld	ISR	FullObsDiscrete	Individual_Q	1.0	0.05	2500000	True	0	True	IndivQLearningSlugsTerminateOnCollision/80_8_0_none	none			0.05
IndivQLearningSlugsTerminateOnCollision/81_8_1	none		True	-10		True	GridWorld	ISR	FullObsDiscrete	Individual_Q	1.0	0.05	2500000	True	1	True	IndivQLearningSlugsTerminateOnCollision/81_8_1_slugs_centralized	slugs_centralized	shields/general_shield		0.05
IndivQLearningSlugsTerminateOnCollision/81_8_1	none		True	-10		True	GridWorld	ISR	FullObsDiscrete	Individual_Q	1.0	0.05	2500000	True	1	True	IndivQLearningSlugsTerminateOnCollision/81_8_1_slugs_decentralized	slugs_decentralized	shields/general_shield	False	0.05
IndivQLearningSlugsTerminateOnCollision/81_8_1	none		True	-10		True	GridWorld	ISR	FullObsDiscrete	Individual_Q	1.0	0.05	2500000	True	1	True	IndivQLearningSlugsTerminateOnCollision/81_8_1_none	none			0.05
IndivQLearningSlugsTerminateOnCollision/82_8_2	none		True	-10		True	GridWorld	ISR	FullObsDiscrete	Individual_Q	1.0	0.05	2500000	True	2	True	IndivQLearningSlugsTerminateOnCollision/82_8_2_slugs_centralized	slugs_centralized	shields/general_shield		0.05
IndivQLearningSlugsTerminateOnCollision/82_8_2	none		True	-10		True	GridWorld	ISR	FullObsDiscrete	Individual_Q	1.0	0.05	2500000	True	2	True	IndivQLearningSlugsTerminateOnCollision/82_8_2_slugs_decentralized	slugs_decentralized	shields/general_shield	False	0.05
IndivQLearningSlugsTerminateOnCollision/82_8_2	none		True	-10		True	GridWorld	ISR	FullObsDiscrete	Individual_Q	1.0	0.05	2500000	True	2	True	IndivQLearningSlugsTerminateOnCollision/82_8_2_none	none			0.05
IndivQLearningSlugsTerminateOnCollision/83_8_3	none		True	-10		True	GridWorld	ISR	FullObsDiscrete	Individual_Q	1.0	0.05	2500000	True	3	True	IndivQLearningSlugsTerminateOnCollision/83_8_3_slugs_centralized	slugs_centralized	shields/general_shield		0.05
IndivQLearningSlugsTerminateOnCollision/83_8_3	none		True	-10		True	GridWorld	ISR	FullObsDiscrete	Individual_Q	1.0	0.05	2500000	True	3	True	IndivQLearningSlugsTerminateOnCollision/83_8_3_slugs_decentralized	slugs_decentralized	shields/general_shield	False	0.05
IndivQLearningSlugsTerminateOnCollision/83_8_3	none		True	-10		True	GridWorld	ISR	FullObsDiscrete	Individual_Q	1.0	0.05	2500000	True	3	True	IndivQLearningSlugsTerminateOnCollision/83_8_3_none	none			0.05
IndivQLearningSlugsTerminateOnCollision/84_8_4	none		True	-10		True	GridWorld	ISR	FullObsDiscrete	Individual_Q	1.0	0.05	2500000	True	4	True	IndivQLearningSlugsTerminateOnCollision/84_8_4_slugs_centralized	slugs_centralized	shields/general_shield		0.05
IndivQLearningSlugsTerminateOnCollision/84_8_4	none		True	-10		True	GridWorld	ISR	FullObsDiscrete	Individual_Q	1.0	0.05	2500000	True	4	True	IndivQLearningSlugsTerminateOnCollision/84_8_4_slugs_decentralized	slugs_decentralized	shields/general_shield	False	0.05
IndivQLearningSlugsTerminateOnCollision/84_8_4	none		True	-10		True	GridWorld	ISR	FullObsDiscrete	Individual_Q	1.0	0.05	2500000	True	4	True	IndivQLearningSlugsTerminateOnCollision/84_8_4_none	none			0.05
IndivQLearningSlugsTerminateOnCollision/85_8_5	none		True	-10		True	GridWorld	ISR	FullObsDiscrete	Individual_Q	1.0	0.05	2500000	True	5	True	IndivQLearningSlugsTerminateOnCollision/85_8_5_slugs_centralized	slugs_centralized	shields/general_shield		0.05
IndivQLearningSlugsTerminateOnCollision/85_8_5	none		True	-10		True	GridWorld	ISR	FullObsDiscrete	Individual_Q	1.0	0.05	2500000	True	5	True	IndivQLearningSlugsTerminateOnCollision/85_8_5_slugs_decentralized	slugs_decentralized	shields/general_shield	False	0.05
IndivQLearningSlugsTerminateOnCollision/85_8_5	none		True	-10		True	GridWorld	ISR	FullObsDiscrete	Individual_Q	1.0	0.05	2500000	True	5	True	IndivQLearningSlugsTerminateOnCollision/85_8_5_none	none			0.05
IndivQLearningSlugsTerminateOnCollision/86_8_6	none		True	-10		True	GridWorld	ISR	FullObsDiscrete	Individual_Q	1.0	0.05	2500000	True	6	True	IndivQLearningSlugsTerminateOnCollision/86_8_6_slugs_centralized	slugs_centralized	shields/general_shield		0.05
IndivQLearningSlugsTerminateOnCollision/86_8_6	none		True	-10		True	GridWorld	ISR	FullObsDiscrete	Individual_Q	1.0	0.05	2500000	True	6	True	IndivQLearningSlugsTerminateOnCollision/86_8_6_slugs_decentralized	slugs_decentralized	shields/general_shield	False	0.05
IndivQLearningSlugsTerminateOnCollision/86_8_6	none		True	-10		True	GridWorld	ISR	FullObsDiscrete	Individual_Q	1.0	0.05	2500000	True	6	True	IndivQLearningSlugsTerminateOnCollision/86_8_6_none	none			0.05
IndivQLearningSlugsTerminateOnCollision/87_8_7	none		True	-10		True	GridWorld	ISR	FullObsDiscrete	Individual_Q	1.0	0.05	2500000	True	7	True	IndivQLearningSlugsTerminateOnCollision/87_8_7_slugs_centralized	slugs_centralized	shields/general_shield		0.05
IndivQLearningSlugsTerminateOnCollision/87_8_7	none		True	-10		True	GridWorld	ISR	FullObsDiscrete	Individual_Q	1.0	0.05	2500000	True	7	True	IndivQLearningSlugsTerminateOnCollision/87_8_7_slugs_decentralized	slugs_decentralized	shields/general_shield	False	0.05
IndivQLearningSlugsTerminateOnCollision/87_8_7	none		True	-10		True	GridWorld	ISR	FullObsDiscrete	Individual_Q	1.0	0.05	2500000	True	7	True	IndivQLearningSlugsTerminateOnCollision/87_8_7_none	none			0.05
IndivQLearningSlugsTerminateOnCollision/88_8_8	none		True	-10		True	GridWorld	ISR	FullObsDiscrete	Individual_Q	1.0	0.05	2500000	True	8	True	IndivQLearningSlugsTerminateOnCollision/88_8_8_slugs_centralized	slugs_centralized	shields/general_shield		0.05
IndivQLearningSlugsTerminateOnCollision/88_8_8	none		True	-10		True	GridWorld	ISR	FullObsDiscrete	Individual_Q	1.0	0.05	2500000	True	8	True	IndivQLearningSlugsTerminateOnCollision/88_8_8_slugs_decentralized	slugs_decentralized	shields/general_shield	False	0.05
IndivQLearningSlugsTerminateOnCollision/88_8_8	none		True	-10		True	GridWorld	ISR	FullObsDiscrete	Individual_Q	1.0	0.05	2500000	True	8	True	IndivQLearningSlugsTerminateOnCollision/88_8_8_none	none			0.05
IndivQLearningSlugsTerminateOnCollision/89_8_9	none		True	-10		True	GridWorld	ISR	FullObsDiscrete	Individual_Q	1.0	0.05	2500000	True	9	True	IndivQLearningSlugsTerminateOnCollision/89_8_9_slugs_centralized	slugs_centralized	shields/general_shield		0.05
IndivQLearningSlugsTerminateOnCollision/89_8_9	none		True	-10		True	GridWorld	ISR	FullObsDiscrete	Individual_Q	1.0	0.05	2500000	True	9	True	IndivQLearningSlugsTerminateOnCollision/89_8_9_slugs_decentralized	slugs_decentralized	shields/general_shield	False	0.05
IndivQLearningSlugsTerminateOnCollision/89_8_9	none		True	-10		True	GridWorld	ISR	FullObsDiscrete	Individual_Q	1.0	0.05	2500000	True	9	True	IndivQLearningSlugsTerminateOnCollision/89_8_9_none	none			0.05
IndivQLearningSlugsTerminateOnCollision/90_9_0	slugs_centralized	shields/general_shield	True	-10		False	GridWorld	ISR	FullObsDiscrete	Individual_Q	1.0	0.05	2500000	True	0	True	IndivQLearningSlugsTerminateOnCollision/90_9_0_slugs_centralized	slugs_centralized	shields/general_shield		0.05
IndivQLearningSlugsTerminateOnCollision/90_9_0	slugs_centralized	shields/general_shield	True	-10		False	GridWorld	ISR	FullObsDiscrete	Individual_Q	1.0	0.05	2500000	True	0	True	IndivQLearningSlugsTerminateOnCollision/90_9_0_slugs_decentralized	slugs_decentralized	shields/general_shield	False	0.05
IndivQLearningSlugsTerminateOnCollision/90_9_0	slugs_centralized	shields/general_shield	True	-10		False	GridWorld	ISR	FullObsDiscrete	Individual_Q	1.0	0.05	2500000	True	0	True	IndivQLearningSlugsTerminateOnCollision/90_9_0_none	none			0.05
IndivQLearningSlugsTerminateOnCollision/91_9_1	slugs_centralized	shields/general_shield	True	-10		False	GridWorld	ISR	FullObsDiscrete	Individual_Q	1.0	0.05	2500000	True	1	True	IndivQLearningSlugsTerminateOnCollision/91_9_1_slugs_centralized	slugs_centralized	shields/general_shield		0.05
IndivQLearningSlugsTerminateOnCollision/91_9_1	slugs_centralized	shields/general_shield	True	-10		False	GridWorld	ISR	FullObsDiscrete	Individual_Q	1.0	0.05	2500000	True	1	True	IndivQLearningSlugsTerminateOnCollision/91_9_1_slugs_decentralized	slugs_decentralized	shields/general_shield	False	0.05
IndivQLearningSlugsTerminateOnCollision/91_9_1	slugs_centralized	shields/general_shield	True	-10		False	GridWorld	ISR	FullObsDiscrete	Individual_Q	1.0	0.05	2500000	True	1	True	IndivQLearningSlugsTerminateOnCollision/91_9_1_none	none			0.05
IndivQLearningSlugsTerminateOnCollision/92_9_2	slugs_centralized	shields/general_shield	True	-10		False	GridWorld	ISR	FullObsDiscrete	Individual_Q	1.0	0.05	2500000	True	2	True	IndivQLearningSlugsTerminateOnCollision/92_9_2_slugs_centralized	slugs_centralized	shields/general_shield		0.05
IndivQLearningSlugsTerminateOnCollision/92_9_2	slugs_centralized	shields/general_shield	True	-10		False	GridWorld	ISR	FullObsDiscrete	Individual_Q	1.0	0.05	2500000	True	2	True	IndivQLearningSlugsTerminateOnCollision/92_9_2_slugs_decentralized	slugs_decentralized	shields/general_shield	False	0.05
IndivQLearningSlugsTerminateOnCollision/92_9_2	slugs_centralized	shields/general_shield	True	-10		False	GridWorld	ISR	FullObsDiscrete	Individual_Q	1.0	0.05	2500000	True	2	True	IndivQLearningSlugsTerminateOnCollision/92_9_2_none	none			0.05
IndivQLearningSlugsTerminateOnCollision/93_9_3	slugs_centralized	shields/general_shield	True	-10		False	GridWorld	ISR	FullObsDiscrete	Individual_Q	1.0	0.05	2500000	True	3	True	IndivQLearningSlugsTerminateOnCollision/93_9_3_slugs_centralized	slugs_centralized	shields/general_shield		0.05
IndivQLearningSlugsTerminateOnCollision/93_9_3	slugs_centralized	shields/general_shield	True	-10		False	GridWorld	ISR	FullObsDiscrete	Individual_Q	1.0	0.05	2500000	True	3	True	IndivQLearningSlugsTerminateOnCollision/93_9_3_slugs_decentralized	slugs_decentralized	shields/general_shield	False	0.05
IndivQLearningSlugsTerminateOnCollision/93_9_3	slugs_centralized	shields/general_shield	True	-10		False	GridWorld	ISR	FullObsDiscrete	Individual_Q	1.0	0.05	2500000	True	3	True	IndivQLearningSlugsTerminateOnCollision/93_9_3_none	none			0.05
IndivQLearningSlugsTerminateOnCollision/94_9_4	slugs_centralized	shields/general_shield	True	-10		False	GridWorld	ISR	FullObsDiscrete	Individual_Q	1.0	0.05	2500000	True	4	True	IndivQLearningSlugsTerminateOnCollision/94_9_4_slugs_centralized	slugs_centralized	shields/general_shield		0.05
IndivQLearningSlugsTerminateOnCollision/94_9_4	slugs_centralized	shields/general_shield	True	-10		False	GridWorld	ISR	FullObsDiscrete	Individual_Q	1.0	0.05	2500000	True	4	True	IndivQLearningSlugsTerminateOnCollision/94_9_4_slugs_decentralized	slugs_decentralized	shields/general_shield	False	0.05
IndivQLearningSlugsTerminateOnCollision/94_9_4	slugs_centralized	shields/general_shield	True	-10		False	GridWorld	ISR	FullObsDiscrete	Individual_Q	1.0	0.05	2500000	True	4	True	IndivQLearningSlugsTerminateOnCollision/94_9_4_none	none			0.05
IndivQLearningSlugsTerminateOnCollision/95_9_5	slugs_centralized	shields/general_shield	True	-10		False	GridWorld	ISR	FullObsDiscrete	Individual_Q	1.0	0.05	2500000	True	5	True	IndivQLearningSlugsTerminateOnCollision/95_9_5_slugs_centralized	slugs_centralized	shields/general_shield		0.05
IndivQLearningSlugsTerminateOnCollision/95_9_5	slugs_centralized	shields/general_shield	True	-10		False	GridWorld	ISR	FullObsDiscrete	Individual_Q	1.0	0.05	2500000	True	5	True	IndivQLearningSlugsTerminateOnCollision/95_9_5_slugs_decentralized	slugs_decentralized	shields/general_shield	False	0.05
IndivQLearningSlugsTerminateOnCollision/95_9_5	slugs_centralized	shields/general_shield	True	-10		False	GridWorld	ISR	FullObsDiscrete	Individual_Q	1.0	0.05	2500000	True	5	True	IndivQLearningSlugsTerminateOnCollision/95_9_5_none	none			0.05
IndivQLearningSlugsTerminateOnCollision/96_9_6	slugs_centralized	shields/general_shield	True	-10		False	GridWorld	ISR	FullObsDiscrete	Individual_Q	1.0	0.05	2500000	True	6	True	IndivQLearningSlugsTerminateOnCollision/96_9_6_slugs_centralized	slugs_centralized	shields/general_shield		0.05
IndivQLearningSlugsTerminateOnCollision/96_9_6	slugs_centralized	shields/general_shield	True	-10		False	GridWorld	ISR	FullObsDiscrete	Individual_Q	1.0	0.05	2500000	True	6	True	IndivQLearningSlugsTerminateOnCollision/96_9_6_slugs_decentralized	slugs_decentralized	shields/general_shield	False	0.05
IndivQLearningSlugsTerminateOnCollision/96_9_6	slugs_centralized	shields/general_shield	True	-10		False	GridWorld	ISR	FullObsDiscrete	Individual_Q	1.0	0.05	2500000	True	6	True	IndivQLearningSlugsTerminateOnCollision/96_9_6_none	none			0.05
IndivQLearningSlugsTerminateOnCollision/97_9_7	slugs_centralized	shields/general_shield	True	-10		False	GridWorld	ISR	FullObsDiscrete	Individual_Q	1.0	0.05	2500000	True	7	True	IndivQLearningSlugsTerminateOnCollision/97_9_7_slugs_centralized	slugs_centralized	shields/general_shield		0.05
IndivQLearningSlugsTerminateOnCollision/97_9_7	slugs_centralized	shields/general_shield	True	-10		False	GridWorld	ISR	FullObsDiscrete	Individual_Q	1.0	0.05	2500000	True	7	True	IndivQLearningSlugsTerminateOnCollision/97_9_7_slugs_decentralized	slugs_decentralized	shields/general_shield	False	0.05
IndivQLearningSlugsTerminateOnCollision/97_9_7	slugs_centralized	shields/general_shield	True	-10		False	GridWorld	ISR	FullObsDiscrete	Individual_Q	1.0	0.05	2500000	True	7	True	IndivQLearningSlugsTerminateOnCollision/97_9_7_none	none			0.05
IndivQLearningSlugsTerminateOnCollision/98_9_8	slugs_centralized	shields/general_shield	True	-10		False	GridWorld	ISR	FullObsDiscrete	Individual_Q	1.0	0.05	2500000	True	8	True	IndivQLearningSlugsTerminateOnCollision/98_9_8_slugs_centralized	slugs_centralized	shields/general_shield		0.05
IndivQLearningSlugsTerminateOnCollision/98_9_8	slugs_centralized	shields/general_shield	True	-10		False	GridWorld	ISR	FullObsDiscrete	Individual_Q	1.0	0.05	2500000	True	8	True	IndivQLearningSlugsTerminateOnCollision/98_9_8_slugs_decentralized	slugs_decentralized	shields/general_shield	False	0.05
IndivQLearningSlugsTerminateOnCollision/98_9_8	slugs_centralized	shields/general_shield	True	-10		False	GridWorld	ISR	FullObsDiscrete	Individual_Q	1.0	0.05	2500000	True	8	True	IndivQLearningSlugsTerminateOnCollision/98_9_8_none	none			0.05
IndivQLearningSlugsTerminateOnCollision/99_9_9	slugs_centralized	shields/general_shield	True	-10		False	GridWorld	ISR	FullObsDiscrete	Individual_Q	1.0	0.05	2500000	True	9	True	IndivQLearningSlugsTerminateOnCollision/99_9_9_slugs_centralized	slugs_centralized	shields/general_shield		0.05
IndivQLearningSlugsTerminateOnCollision/99_9_9	slugs_centralized	shields/general_shield	True	-10		False	GridWorld	ISR	FullObsDiscrete	Individual_Q	1.0	0.05	2500000	True	9	True	IndivQLearningSlugsTerminateOnCollision/99_9_9_slugs_decentralized	slugs_decentralized	shields/general_shield	False	0.05
IndivQLearningSlugsTerminateOnCollision/99_9_9	slugs_centralized	shields/general_shield	True	-10		False	GridWorld	ISR	FullObsDiscrete	Individual_Q	1.0	0.05	2500000	True	9	True	IndivQLearningSlugsTerminateOnCollision/99_9_9_none	none			0.05
IndivQLearningSlugsTerminateOnCollision/100_10_0	slugs_decentralized	shields/general_shield	True	-10	False	False	GridWorld	ISR	FullObsDiscrete	Individual_Q	1.0	0.05	2500000	True	0	True	IndivQLearningSlugsTerminateOnCollision/100_10_0_slugs_centralized	slugs_centralized	shields/general_shield		0.05
IndivQLearningSlugsTerminateOnCollision/100_10_0	slugs_decentralized	shields/general_shield	True	-10	False	False	GridWorld	ISR	FullObsDiscrete	Individual_Q	1.0	0.05	2500000	True	0	True	IndivQLearningSlugsTerminateOnCollision/100_10_0_slugs_decentralized	slugs_decentralized	shields/general_shield	False	0.05
IndivQLearningSlugsTerminateOnCollision/100_10_0	slugs_decentralized	shields/general_shield	True	-10	False	False	GridWorld	ISR	FullObsDiscrete	Individual_Q	1.0	0.05	2500000	True	0	True	IndivQLearningSlugsTerminateOnCollision/100_10_0_none	none			0.05
IndivQLearningSlugsTerminateOnCollision/101_10_1	slugs_decentralized	shields/general_shield	True	-10	False	False	GridWorld	ISR	FullObsDiscrete	Individual_Q	1.0	0.05	2500000	True	1	True	IndivQLearningSlugsTerminateOnCollision/101_10_1_slugs_centralized	slugs_centralized	shields/general_shield		0.05
IndivQLearningSlugsTerminateOnCollision/101_10_1	slugs_decentralized	shields/general_shield	True	-10	False	False	GridWorld	ISR	FullObsDiscrete	Individual_Q	1.0	0.05	2500000	True	1	True	IndivQLearningSlugsTerminateOnCollision/101_10_1_slugs_decentralized	slugs_decentralized	shields/general_shield	False	0.05
IndivQLearningSlugsTerminateOnCollision/101_10_1	slugs_decentralized	shields/general_shield	True	-10	False	False	GridWorld	ISR	FullObsDiscrete	Individual_Q	1.0	0.05	2500000	True	1	True	IndivQLearningSlugsTerminateOnCollision/101_10_1_none	none			0.05
IndivQLearningSlugsTerminateOnCollision/102_10_2	slugs_decentralized	shields/general_shield	True	-10	False	False	GridWorld	ISR	FullObsDiscrete	Individual_Q	1.0	0.05	2500000	True	2	True	IndivQLearningSlugsTerminateOnCollision/102_10_2_slugs_centralized	slugs_centralized	shields/general_shield		0.05
IndivQLearningSlugsTerminateOnCollision/102_10_2	slugs_decentralized	shields/general_shield	True	-10	False	False	GridWorld	ISR	FullObsDiscrete	Individual_Q	1.0	0.05	2500000	True	2	True	IndivQLearningSlugsTerminateOnCollision/102_10_2_slugs_decentralized	slugs_decentralized	shields/general_shield	False	0.05
IndivQLearningSlugsTerminateOnCollision/102_10_2	slugs_decentralized	shields/general_shield	True	-10	False	False	GridWorld	ISR	FullObsDiscrete	Individual_Q	1.0	0.05	2500000	True	2	True	IndivQLearningSlugsTerminateOnCollision/102_10_2_none	none			0.05
IndivQLearningSlugsTerminateOnCollision/103_10_3	slugs_decentralized	shields/general_shield	True	-10	False	False	GridWorld	ISR	FullObsDiscrete	Individual_Q	1.0	0.05	2500000	True	3	True	IndivQLearningSlugsTerminateOnCollision/103_10_3_slugs_centralized	slugs_centralized	shields/general_shield		0.05
IndivQLearningSlugsTerminateOnCollision/103_10_3	slugs_decentralized	shields/general_shield	True	-10	False	False	GridWorld	ISR	FullObsDiscrete	Individual_Q	1.0	0.05	2500000	True	3	True	IndivQLearningSlugsTerminateOnCollision/103_10_3_slugs_decentralized	slugs_decentralized	shields/general_shield	False	0.05
IndivQLearningSlugsTerminateOnCollision/103_10_3	slugs_decentralized	shields/general_shield	True	-10	False	False	GridWorld	ISR	FullObsDiscrete	Individual_Q	1.0	0.05	2500000	True	3	True	IndivQLearningSlugsTerminateOnCollision/103_10_3_none	none			0.05
IndivQLearningSlugsTerminateOnCollision/104_10_4	slugs_decentralized	shields/general_shield	True	-10	False	False	GridWorld	ISR	FullObsDiscrete	Individual_Q	1.0	0.05	2500000	True	4	True	IndivQLearningSlugsTerminateOnCollision/104_10_4_slugs_centralized	slugs_centralized	shields/general_shield		0.05
IndivQLearningSlugsTerminateOnCollision/104_10_4	slugs_decentralized	shields/general_shield	True	-10	False	False	GridWorld	ISR	FullObsDiscrete	Individual_Q	1.0	0.05	2500000	True	4	True	IndivQLearningSlugsTerminateOnCollision/104_10_4_slugs_decentralized	slugs_decentralized	shields/general_shield	False	0.05
IndivQLearningSlugsTerminateOnCollision/104_10_4	slugs_decentralized	shields/general_shield	True	-10	False	False	GridWorld	ISR	FullObsDiscrete	Individual_Q	1.0	0.05	2500000	True	4	True	IndivQLearningSlugsTerminateOnCollision/104_10_4_none	none			0.05
IndivQLearningSlugsTerminateOnCollision/105_10_5	slugs_decentralized	shields/general_shield	True	-10	False	False	GridWorld	ISR	FullObsDiscrete	Individual_Q	1.0	0.05	2500000	True	5	True	IndivQLearningSlugsTerminateOnCollision/105_10_5_slugs_centralized	slugs_centralized	shields/general_shield		0.05
IndivQLearningSlugsTerminateOnCollision/105_10_5	slugs_decentralized	shields/general_shield	True	-10	False	False	GridWorld	ISR	FullObsDiscrete	Individual_Q	1.0	0.05	2500000	True	5	True	IndivQLearningSlugsTerminateOnCollision/105_10_5_slugs_decentralized	slugs_decentralized	shields/general_shield	False	0.05
IndivQLearningSlugsTerminateOnCollision/105_10_5	slugs_decentralized	shields/general_shield	True	-10	False	False	GridWorld	ISR	FullObsDiscrete	Individual_Q	1.0	0.05	2500000	True	5	True	IndivQLearningSlugsTerminateOnCollision/105_10_5_none	none			0.05
IndivQLearningSlugsTerminateOnCollision/106_10_6	slugs_decentralized	shields/general_shield	True	-10	False	False	GridWorld	ISR	FullObsDiscrete	Individual_Q	1.0	0.05	2500000	True	6	True	IndivQLearningSlugsTerminateOnCollision/106_10_6_slugs_centralized	slugs_centralized	shields/general_shield		0.05
IndivQLearningSlugsTerminateOnCollision/106_10_6	slugs_decentralized	shields/general_shield	True	-10	False	False	GridWorld	ISR	FullObsDiscrete	Individual_Q	1.0	0.05	2500000	True	6	True	IndivQLearningSlugsTerminateOnCollision/106_10_6_slugs_decentralized	slugs_decentralized	shields/general_shield	False	0.05
IndivQLearningSlugsTerminateOnCollision/106_10_6	slugs_decentralized	shields/general_shield	True	-10	False	False	GridWorld	ISR	FullObsDiscrete	Individual_Q	1.0	0.05	2500000	True	6	True	IndivQLearningSlugsTerminateOnCollision/106_10_6_none	none			0.05
IndivQLearningSlugsTerminateOnCollision/107_10_7	slugs_decentralized	shields/general_shield	True	-10	False	False	GridWorld	ISR	FullObsDiscrete	Individual_Q	1.0	0.05	2500000	True	7	True	IndivQLearningSlugsTerminateOnCollision/107_10_7_slugs_centralized	slugs_centralized	shields/general_shield		0.05
IndivQLearningSlugsTerminateOnCollision/107_10_7	slugs_decentralized	shields/general_shield	True	-10	False	False	GridWorld	ISR	FullObsDiscrete	Individual_Q	1.0	0.05	2500000	True	7	True	IndivQLearningSlugsTerminateOnCollision/107_10_7_slugs_decentralized	slugs_decentralized	shields/general_shield	False	0.05
IndivQLearningSlugsTerminateOnCollision/107_10_7	slugs_decentralized	shields/general_shield	True	-10	False	False	GridWorld	ISR	FullObsDiscrete	Individual_Q	1.0	0.05	2500000	True	7	True	IndivQLearningSlugsTerminateOnCollision/107_10_7_none	none			0.05
IndivQLearningSlugsTerminateOnCollision/108_10_8	slugs_decentralized	shields/general_shield	True	-10	False	False	GridWorld	ISR	FullObsDiscrete	Individual_Q	1.0	0.05	2500000	True	8	True	IndivQLearningSlugsTerminateOnCollision/108_10_8_slugs_centralized	slugs_centralized	shields/general_shield		0.05
IndivQLearningSlugsTerminateOnCollision/108_10_8	slugs_decentralized	shields/general_shield	True	-10	False	False	GridWorld	ISR	FullObsDiscrete	Individual_Q	1.0	0.05	2500000	True	8	True	IndivQLearningSlugsTerminateOnCollision/108_10_8_slugs_decentralized	slugs_decentralized	shields/general_shield	False	0.05
IndivQLearningSlugsTerminateOnCollision/108_10_8	slugs_decentralized	shields/general_shield	True	-10	False	False	GridWorld	ISR	FullObsDiscrete	Individual_Q	1.0	0.05	2500000	True	8	True	IndivQLearningSlugsTerminateOnCollision/108_10_8_none	none			0.05
IndivQLearningSlugsTerminateOnCollision/109_10_9	slugs_decentralized	shields/general_shield	True	-10	False	False	GridWorld	ISR	FullObsDiscrete	Individual_Q	1.0	0.05	2500000	True	9	True	IndivQLearningSlugsTerminateOnCollision/109_10_9_slugs_centralized	slugs_centralized	shields/general_shield		0.05
IndivQLearningSlugsTerminateOnCollision/109_10_9	slugs_decentralized	shields/general_shield	True	-10	False	False	GridWorld	ISR	FullObsDiscrete	Individual_Q	1.0	0.05	2500000	True	9	True	IndivQLearningSlugsTerminateOnCollision/109_10_9_slugs_decentralized	slugs_decentralized	shields/general_shield	False	0.05
IndivQLearningSlugsTerminateOnCollision/109_10_9	slugs_decentralized	shields/general_shield	True	-10	False	False	GridWorld	ISR	FullObsDiscrete	Individual_Q	1.0	0.05	2500000	True	9	True	IndivQLearningSlugsTerminateOnCollision/109_10_9_none	none			0.05
IndivQLearningSlugsTerminateOnCollision/110_11_0	none		True	-10		False	GridWorld	ISR	FullObsDiscrete	Individual_Q	1.0	0.05	2500000	True	0	True	IndivQLearningSlugsTerminateOnCollision/110_11_0_slugs_centralized	slugs_centralized	shields/general_shield		0.05
IndivQLearningSlugsTerminateOnCollision/110_11_0	none		True	-10		False	GridWorld	ISR	FullObsDiscrete	Individual_Q	1.0	0.05	2500000	True	0	True	IndivQLearningSlugsTerminateOnCollision/110_11_0_slugs_decentralized	slugs_decentralized	shields/general_shield	False	0.05
IndivQLearningSlugsTerminateOnCollision/110_11_0	none		True	-10		False	GridWorld	ISR	FullObsDiscrete	Individual_Q	1.0	0.05	2500000	True	0	True	IndivQLearningSlugsTerminateOnCollision/110_11_0_none	none			0.05
IndivQLearningSlugsTerminateOnCollision/111_11_1	none		True	-10		False	GridWorld	ISR	FullObsDiscrete	Individual_Q	1.0	0.05	2500000	True	1	True	IndivQLearningSlugsTerminateOnCollision/111_11_1_slugs_centralized	slugs_centralized	shields/general_shield		0.05
IndivQLearningSlugsTerminateOnCollision/111_11_1	none		True	-10		False	GridWorld	ISR	FullObsDiscrete	Individual_Q	1.0	0.05	2500000	True	1	True	IndivQLearningSlugsTerminateOnCollision/111_11_1_slugs_decentralized	slugs_decentralized	shields/general_shield	False	0.05
IndivQLearningSlugsTerminateOnCollision/111_11_1	none		True	-10		False	GridWorld	ISR	FullObsDiscrete	Individual_Q	1.0	0.05	2500000	True	1	True	IndivQLearningSlugsTerminateOnCollision/111_11_1_none	none			0.05
IndivQLearningSlugsTerminateOnCollision/112_11_2	none		True	-10		False	GridWorld	ISR	FullObsDiscrete	Individual_Q	1.0	0.05	2500000	True	2	True	IndivQLearningSlugsTerminateOnCollision/112_11_2_slugs_centralized	slugs_centralized	shields/general_shield		0.05
IndivQLearningSlugsTerminateOnCollision/112_11_2	none		True	-10		False	GridWorld	ISR	FullObsDiscrete	Individual_Q	1.0	0.05	2500000	True	2	True	IndivQLearningSlugsTerminateOnCollision/112_11_2_slugs_decentralized	slugs_decentralized	shields/general_shield	False	0.05
IndivQLearningSlugsTerminateOnCollision/112_11_2	none		True	-10		False	GridWorld	ISR	FullObsDiscrete	Individual_Q	1.0	0.05	2500000	True	2	True	IndivQLearningSlugsTerminateOnCollision/112_11_2_none	none			0.05
IndivQLearningSlugsTerminateOnCollision/113_11_3	none		True	-10		False	GridWorld	ISR	FullObsDiscrete	Individual_Q	1.0	0.05	2500000	True	3	True	IndivQLearningSlugsTerminateOnCollision/113_11_3_slugs_centralized	slugs_centralized	shields/general_shield		0.05
IndivQLearningSlugsTerminateOnCollision/113_11_3	none		True	-10		False	GridWorld	ISR	FullObsDiscrete	Individual_Q	1.0	0.05	2500000	True	3	True	IndivQLearningSlugsTerminateOnCollision/113_11_3_slugs_decentralized	slugs_decentralized	shields/general_shield	False	0.05
IndivQLearningSlugsTerminateOnCollision/113_11_3	none		True	-10		False	GridWorld	ISR	FullObsDiscrete	Individual_Q	1.0	0.05	2500000	True	3	True	IndivQLearningSlugsTerminateOnCollision/113_11_3_none	none			0.05
IndivQLearningSlugsTerminateOnCollision/114_11_4	none		True	-10		False	GridWorld	ISR	FullObsDiscrete	Individual_Q	1.0	0.05	2500000	True	4	True	IndivQLearningSlugsTerminateOnCollision/114_11_4_slugs_centralized	slugs_centralized	shields/general_shield		0.05
IndivQLearningSlugsTerminateOnCollision/114_11_4	none		True	-10		False	GridWorld	ISR	FullObsDiscrete	Individual_Q	1.0	0.05	2500000	True	4	True	IndivQLearningSlugsTerminateOnCollision/114_11_4_slugs_decentralized	slugs_decentralized	shields/general_shield	False	0.05
IndivQLearningSlugsTerminateOnCollision/114_11_4	none		True	-10		False	GridWorld	ISR	FullObsDiscrete	Individual_Q	1.0	0.05	2500000	True	4	True	IndivQLearningSlugsTerminateOnCollision/114_11_4_none	none			0.05
IndivQLearningSlugsTerminateOnCollision/115_11_5	none		True	-10		False	GridWorld	ISR	FullObsDiscrete	Individual_Q	1.0	0.05	2500000	True	5	True	IndivQLearningSlugsTerminateOnCollision/115_11_5_slugs_centralized	slugs_centralized	shields/general_shield		0.05
IndivQLearningSlugsTerminateOnCollision/115_11_5	none		True	-10		False	GridWorld	ISR	FullObsDiscrete	Individual_Q	1.0	0.05	2500000	True	5	True	IndivQLearningSlugsTerminateOnCollision/115_11_5_slugs_decentralized	slugs_decentralized	shields/general_shield	False	0.05
IndivQLearningSlugsTerminateOnCollision/115_11_5	none		True	-10		False	GridWorld	ISR	FullObsDiscrete	Individual_Q	1.0	0.05	2500000	True	5	True	IndivQLearningSlugsTerminateOnCollision/115_11_5_none	none			0.05
IndivQLearningSlugsTerminateOnCollision/116_11_6	none		True	-10		False	GridWorld	ISR	FullObsDiscrete	Individual_Q	1.0	0.05	2500000	True	6	True	IndivQLearningSlugsTerminateOnCollision/116_11_6_slugs_centralized	slugs_centralized	shields/general_shield		0.05
IndivQLearningSlugsTerminateOnCollision/116_11_6	none		True	-10		False	GridWorld	ISR	FullObsDiscrete	Individual_Q	1.0	0.05	2500000	True	6	True	IndivQLearningSlugsTerminateOnCollision/116_11_6_slugs_decentralized	slugs_decentralized	shields/general_shield	False	0.05
IndivQLearningSlugsTerminateOnCollision/116_11_6	none		True	-10		False	GridWorld	ISR	FullObsDiscrete	Individual_Q	1.0	0.05	2500000	True	6	True	IndivQLearningSlugsTerminateOnCollision/116_11_6_none	none			0.05
IndivQLearningSlugsTerminateOnCollision/117_11_7	none		True	-10		False	GridWorld	ISR	FullObsDiscrete	Individual_Q	1.0	0.05	2500000	True	7	True	IndivQLearningSlugsTerminateOnCollision/117_11_7_slugs_centralized	slugs_centralized	shields/general_shield		0.05
IndivQLearningSlugsTerminateOnCollision/117_11_7	none		True	-10		False	GridWorld	ISR	FullObsDiscrete	Individual_Q	1.0	0.05	2500000	True	7	True	IndivQLearningSlugsTerminateOnCollision/117_11_7_slugs_decentralized	slugs_decentralized	shields/general_shield	False	0.05
IndivQLearningSlugsTerminateOnCollision/117_11_7	none		True	-10		False	GridWorld	ISR	FullObsDiscrete	Individual_Q	1.0	0.05	2500000	True	7	True	IndivQLearningSlugsTerminateOnCollision/117_11_7_none	none			0.05
IndivQLearningSlugsTerminateOnCollision/118_11_8	none		True	-10		False	GridWorld	ISR	FullObsDiscrete	Individual_Q	1.0	0.05	2500000	True	8	True	IndivQLearningSlugsTerminateOnCollision/118_11_8_slugs_centralized	slugs_centralized	shields/general_shield		0.05
IndivQLearningSlugsTerminateOnCollision/118_11_8	none		True	-10		False	GridWorld	ISR	FullObsDiscrete	Individual_Q	1.0	0.05	2500000	True	8	True	IndivQLearningSlugsTerminateOnCollision/118_11_8_slugs_decentralized	slugs_decentralized	shields/general_shield	False	0.05
IndivQLearningSlugsTerminateOnCollision/118_11_8	none		True	-10		False	GridWorld	ISR	FullObsDiscrete	Individual_Q	1.0	0.05	2500000	True	8	True	IndivQLearningSlugsTerminateOnCollision/118_11_8_none	none			0.05
IndivQLearningSlugsTerminateOnCollision/119_11_9	none		True	-10		False	GridWorld	ISR	FullObsDiscrete	Individual_Q	1.0	0.05	2500000	True	9	True	IndivQLearningSlugsTerminateOnCollision/119_11_9_slugs_centralized	slugs_centralized	shields/general_shield		0.05
IndivQLearningSlugsTerminateOnCollision/119_11_9	none		True	-10		False	GridWorld	ISR	FullObsDiscrete	Individual_Q	1.0	0.05	2500000	True	9	True	IndivQLearningSlugsTerminateOnCollision/119_11_9_slugs_decentralized	slugs_decentralized	shields/general_shield	False	0.05
IndivQLearningSlugsTerminateOnCollision/119_11_9	none		True	-10		False	GridWorld	ISR	FullObsDiscrete	Individual_Q	1.0	0.05	2500000	True	9	True	IndivQLearningSlugsTerminateOnCollision/119_11_9_none	none			0.05
IndivQLearningSlugsTerminateOnCollision/120_12_0	slugs_centralized	shields/general_shield	True	-10		True	GridWorld	MIT	FullObsDiscrete	Individual_Q	1.0	0.05	2500000	True	0	True	IndivQLearningSlugsTerminateOnCollision/120_12_0_slugs_centralized	slugs_centralized	shields/general_shield		0.05
IndivQLearningSlugsTerminateOnCollision/120_12_0	slugs_centralized	shields/general_shield	True	-10		True	GridWorld	MIT	FullObsDiscrete	Individual_Q	1.0	0.05	2500000	True	0	True	IndivQLearningSlugsTerminateOnCollision/120_12_0_slugs_decentralized	slugs_decentralized	shields/general_shield	False	0.05
IndivQLearningSlugsTerminateOnCollision/120_12_0	slugs_centralized	shields/general_shield	True	-10		True	GridWorld	MIT	FullObsDiscrete	Individual_Q	1.0	0.05	2500000	True	0	True	IndivQLearningSlugsTerminateOnCollision/120_12_0_none	none			0.05
IndivQLearningSlugsTerminateOnCollision/121_12_1	slugs_centralized	shields/general_shield	True	-10		True	GridWorld	MIT	FullObsDiscrete	Individual_Q	1.0	0.05	2500000	True	1	True	IndivQLearningSlugsTerminateOnCollision/121_12_1_slugs_centralized	slugs_centralized	shields/general_shield		0.05
IndivQLearningSlugsTerminateOnCollision/121_12_1	slugs_centralized	shields/general_shield	True	-10		True	GridWorld	MIT	FullObsDiscrete	Individual_Q	1.0	0.05	2500000	True	1	True	IndivQLearningSlugsTerminateOnCollision/121_12_1_slugs_decentralized	slugs_decentralized	shields/general_shield	False	0.05
IndivQLearningSlugsTerminateOnCollision/121_12_1	slugs_centralized	shields/general_shield	True	-10		True	GridWorld	MIT	FullObsDiscrete	Individual_Q	1.0	0.05	2500000	True	1	True	IndivQLearningSlugsTerminateOnCollision/121_12_1_none	none			0.05
IndivQLearningSlugsTerminateOnCollision/122_12_2	slugs_centralized	shields/general_shield	True	-10		True	GridWorld	MIT	FullObsDiscrete	Individual_Q	1.0	0.05	2500000	True	2	True	IndivQLearningSlugsTerminateOnCollision/122_12_2_slugs_centralized	slugs_centralized	shields/general_shield		0.05
IndivQLearningSlugsTerminateOnCollision/122_12_2	slugs_centralized	shields/general_shield	True	-10		True	GridWorld	MIT	FullObsDiscrete	Individual_Q	1.0	0.05	2500000	True	2	True	IndivQLearningSlugsTerminateOnCollision/122_12_2_slugs_decentralized	slugs_decentralized	shields/general_shield	False	0.05
IndivQLearningSlugsTerminateOnCollision/122_12_2	slugs_centralized	shields/general_shield	True	-10		True	GridWorld	MIT	FullObsDiscrete	Individual_Q	1.0	0.05	2500000	True	2	True	IndivQLearningSlugsTerminateOnCollision/122_12_2_none	none			0.05
IndivQLearningSlugsTerminateOnCollision/123_12_3	slugs_centralized	shields/general_shield	True	-10		True	GridWorld	MIT	FullObsDiscrete	Individual_Q	1.0	0.05	2500000	True	3	True	IndivQLearningSlugsTerminateOnCollision/123_12_3_slugs_centralized	slugs_centralized	shields/general_shield		0.05
IndivQLearningSlugsTerminateOnCollision/123_12_3	slugs_centralized	shields/general_shield	True	-10		True	GridWorld	MIT	FullObsDiscrete	Individual_Q	1.0	0.05	2500000	True	3	True	IndivQLearningSlugsTerminateOnCollision/123_12_3_slugs_decentralized	slugs_decentralized	shields/general_shield	False	0.05
IndivQLearningSlugsTerminateOnCollision/123_12_3	slugs_centralized	shields/general_shield	True	-10		True	GridWorld	MIT	FullObsDiscrete	Individual_Q	1.0	0.05	2500000	True	3	True	IndivQLearningSlugsTerminateOnCollision/123_12_3_none	none			0.05
IndivQLearningSlugsTerminateOnCollision/124_12_4	slugs_centralized	shields/general_shield	True	-10		True	GridWorld	MIT	FullObsDiscrete	Individual_Q	1.0	0.05	2500000	True	4	True	IndivQLearningSlugsTerminateOnCollision/124_12_4_slugs_centralized	slugs_centralized	shields/general_shield		0.05
IndivQLearningSlugsTerminateOnCollision/124_12_4	slugs_centralized	shields/general_shield	True	-10		True	GridWorld	MIT	FullObsDiscrete	Individual_Q	1.0	0.05	2500000	True	4	True	IndivQLearningSlugsTerminateOnCollision/124_12_4_slugs_decentralized	slugs_decentralized	shields/general_shield	False	0.05
IndivQLearningSlugsTerminateOnCollision/124_12_4	slugs_centralized	shields/general_shield	True	-10		True	GridWorld	MIT	FullObsDiscrete	Individual_Q	1.0	0.05	2500000	True	4	True	IndivQLearningSlugsTerminateOnCollision/124_12_4_none	none			0.05
IndivQLearningSlugsTerminateOnCollision/125_12_5	slugs_centralized	shields/general_shield	True	-10		True	GridWorld	MIT	FullObsDiscrete	Individual_Q	1.0	0.05	2500000	True	5	True	IndivQLearningSlugsTerminateOnCollision/125_12_5_slugs_centralized	slugs_centralized	shields/general_shield		0.05
IndivQLearningSlugsTerminateOnCollision/125_12_5	slugs_centralized	shields/general_shield	True	-10		True	GridWorld	MIT	FullObsDiscrete	Individual_Q	1.0	0.05	2500000	True	5	True	IndivQLearningSlugsTerminateOnCollision/125_12_5_slugs_decentralized	slugs_decentralized	shields/general_shield	False	0.05
IndivQLearningSlugsTerminateOnCollision/125_12_5	slugs_centralized	shields/general_shield	True	-10		True	GridWorld	MIT	FullObsDiscrete	Individual_Q	1.0	0.05	2500000	True	5	True	IndivQLearningSlugsTerminateOnCollision/125_12_5_none	none			0.05
IndivQLearningSlugsTerminateOnCollision/126_12_6	slugs_centralized	shields/general_shield	True	-10		True	GridWorld	MIT	FullObsDiscrete	Individual_Q	1.0	0.05	2500000	True	6	True	IndivQLearningSlugsTerminateOnCollision/126_12_6_slugs_centralized	slugs_centralized	shields/general_shield		0.05
IndivQLearningSlugsTerminateOnCollision/126_12_6	slugs_centralized	shields/general_shield	True	-10		True	GridWorld	MIT	FullObsDiscrete	Individual_Q	1.0	0.05	2500000	True	6	True	IndivQLearningSlugsTerminateOnCollision/126_12_6_slugs_decentralized	slugs_decentralized	shields/general_shield	False	0.05
IndivQLearningSlugsTerminateOnCollision/126_12_6	slugs_centralized	shields/general_shield	True	-10		True	GridWorld	MIT	FullObsDiscrete	Individual_Q	1.0	0.05	2500000	True	6	True	IndivQLearningSlugsTerminateOnCollision/126_12_6_none	none			0.05
IndivQLearningSlugsTerminateOnCollision/127_12_7	slugs_centralized	shields/general_shield	True	-10		True	GridWorld	MIT	FullObsDiscrete	Individual_Q	1.0	0.05	2500000	True	7	True	IndivQLearningSlugsTerminateOnCollision/127_12_7_slugs_centralized	slugs_centralized	shields/general_shield		0.05
IndivQLearningSlugsTerminateOnCollision/127_12_7	slugs_centralized	shields/general_shield	True	-10		True	GridWorld	MIT	FullObsDiscrete	Individual_Q	1.0	0.05	2500000	True	7	True	IndivQLearningSlugsTerminateOnCollision/127_12_7_slugs_decentralized	slugs_decentralized	shields/general_shield	False	0.05
IndivQLearningSlugsTerminateOnCollision/127_12_7	slugs_centralized	shields/general_shield	True	-10		True	GridWorld	MIT	FullObsDiscrete	Individual_Q	1.0	0.05	2500000	True	7	True	IndivQLearningSlugsTerminateOnCollision/127_12_7_none	none			0.05
IndivQLearningSlugsTerminateOnCollision/128_12_8	slugs_centralized	shields/general_shield	True	-10		True	GridWorld	MIT	FullObsDiscrete	Individual_Q	1.0	0.05	2500000	True	8	True	IndivQLearningSlugsTerminateOnCollision/128_12_8_slugs_centralized	slugs_centralized	shields/general_shield		0.05
IndivQLearningSlugsTerminateOnCollision/128_12_8	slugs_centralized	shields/general_shield	True	-10		True	GridWorld	MIT	FullObsDiscrete	Individual_Q	1.0	0.05	2500000	True	8	True	IndivQLearningSlugsTerminateOnCollision/128_12_8_slugs_decentralized	slugs_decentralized	shields/general_shield	False	0.05
IndivQLearningSlugsTerminateOnCollision/128_12_8	slugs_centralized	shields/general_shield	True	-10		True	GridWorld	MIT	FullObsDiscrete	Individual_Q	1.0	0.05	2500000	True	8	True	IndivQLearningSlugsTerminateOnCollision/128_12_8_none	none			0.05
IndivQLearningSlugsTerminateOnCollision/129_12_9	slugs_centralized	shields/general_shield	True	-10		True	GridWorld	MIT	FullObsDiscrete	Individual_Q	1.0	0.05	2500000	True	9	True	IndivQLearningSlugsTerminateOnCollision/129_12_9_slugs_centralized	slugs_centralized	shields/general_shield		0.05
IndivQLearningSlugsTerminateOnCollision/129_12_9	slugs_centralized	shields/general_shield	True	-10		True	GridWorld	MIT	FullObsDiscrete	Individual_Q	1.0	0.05	2500000	True	9	True	IndivQLearningSlugsTerminateOnCollision/129_12_9_slugs_decentralized	slugs_decentralized	shields/general_shield	False	0.05
IndivQLearningSlugsTerminateOnCollision/129_12_9	slugs_centralized	shields/general_shield	True	-10		True	GridWorld	MIT	FullObsDiscrete	Individual_Q	1.0	0.05	2500000	True	9	True	IndivQLearningSlugsTerminateOnCollision/129_12_9_none	none			0.05
IndivQLearningSlugsTerminateOnCollision/130_13_0	slugs_decentralized	shields/general_shield	True	-10	False	True	GridWorld	MIT	FullObsDiscrete	Individual_Q	1.0	0.05	2500000	True	0	True	IndivQLearningSlugsTerminateOnCollision/130_13_0_slugs_centralized	slugs_centralized	shields/general_shield		0.05
IndivQLearningSlugsTerminateOnCollision/130_13_0	slugs_decentralized	shields/general_shield	True	-10	False	True	GridWorld	MIT	FullObsDiscrete	Individual_Q	1.0	0.05	2500000	True	0	True	IndivQLearningSlugsTerminateOnCollision/130_13_0_slugs_decentralized	slugs_decentralized	shields/general_shield	False	0.05
IndivQLearningSlugsTerminateOnCollision/130_13_0	slugs_decentralized	shields/general_shield	True	-10	False	True	GridWorld	MIT	FullObsDiscrete	Individual_Q	1.0	0.05	2500000	True	0	True	IndivQLearningSlugsTerminateOnCollision/130_13_0_none	none			0.05
IndivQLearningSlugsTerminateOnCollision/131_13_1	slugs_decentralized	shields/general_shield	True	-10	False	True	GridWorld	MIT	FullObsDiscrete	Individual_Q	1.0	0.05	2500000	True	1	True	IndivQLearningSlugsTerminateOnCollision/131_13_1_slugs_centralized	slugs_centralized	shields/general_shield		0.05
IndivQLearningSlugsTerminateOnCollision/131_13_1	slugs_decentralized	shields/general_shield	True	-10	False	True	GridWorld	MIT	FullObsDiscrete	Individual_Q	1.0	0.05	2500000	True	1	True	IndivQLearningSlugsTerminateOnCollision/131_13_1_slugs_decentralized	slugs_decentralized	shields/general_shield	False	0.05
IndivQLearningSlugsTerminateOnCollision/131_13_1	slugs_decentralized	shields/general_shield	True	-10	False	True	GridWorld	MIT	FullObsDiscrete	Individual_Q	1.0	0.05	2500000	True	1	True	IndivQLearningSlugsTerminateOnCollision/131_13_1_none	none			0.05
IndivQLearningSlugsTerminateOnCollision/132_13_2	slugs_decentralized	shields/general_shield	True	-10	False	True	GridWorld	MIT	FullObsDiscrete	Individual_Q	1.0	0.05	2500000	True	2	True	IndivQLearningSlugsTerminateOnCollision/132_13_2_slugs_centralized	slugs_centralized	shields/general_shield		0.05
IndivQLearningSlugsTerminateOnCollision/132_13_2	slugs_decentralized	shields/general_shield	True	-10	False	True	GridWorld	MIT	FullObsDiscrete	Individual_Q	1.0	0.05	2500000	True	2	True	IndivQLearningSlugsTerminateOnCollision/132_13_2_slugs_decentralized	slugs_decentralized	shields/general_shield	False	0.05
IndivQLearningSlugsTerminateOnCollision/132_13_2	slugs_decentralized	shields/general_shield	True	-10	False	True	GridWorld	MIT	FullObsDiscrete	Individual_Q	1.0	0.05	2500000	True	2	True	IndivQLearningSlugsTerminateOnCollision/132_13_2_none	none			0.05
IndivQLearningSlugsTerminateOnCollision/133_13_3	slugs_decentralized	shields/general_shield	True	-10	False	True	GridWorld	MIT	FullObsDiscrete	Individual_Q	1.0	0.05	2500000	True	3	True	IndivQLearningSlugsTerminateOnCollision/133_13_3_slugs_centralized	slugs_centralized	shields/general_shield		0.05
IndivQLearningSlugsTerminateOnCollision/133_13_3	slugs_decentralized	shields/general_shield	True	-10	False	True	GridWorld	MIT	FullObsDiscrete	Individual_Q	1.0	0.05	2500000	True	3	True	IndivQLearningSlugsTerminateOnCollision/133_13_3_slugs_decentralized	slugs_decentralized	shields/general_shield	False	0.05
IndivQLearningSlugsTerminateOnCollision/133_13_3	slugs_decentralized	shields/general_shield	True	-10	False	True	GridWorld	MIT	FullObsDiscrete	Individual_Q	1.0	0.05	2500000	True	3	True	IndivQLearningSlugsTerminateOnCollision/133_13_3_none	none			0.05
IndivQLearningSlugsTerminateOnCollision/134_13_4	slugs_decentralized	shields/general_shield	True	-10	False	True	GridWorld	MIT	FullObsDiscrete	Individual_Q	1.0	0.05	2500000	True	4	True	IndivQLearningSlugsTerminateOnCollision/134_13_4_slugs_centralized	slugs_centralized	shields/general_shield		0.05
IndivQLearningSlugsTerminateOnCollision/134_13_4	slugs_decentralized	shields/general_shield	True	-10	False	True	GridWorld	MIT	FullObsDiscrete	Individual_Q	1.0	0.05	2500000	True	4	True	IndivQLearningSlugsTerminateOnCollision/134_13_4_slugs_decentralized	slugs_decentralized	shields/general_shield	False	0.05
IndivQLearningSlugsTerminateOnCollision/134_13_4	slugs_decentralized	shields/general_shield	True	-10	False	True	GridWorld	MIT	FullObsDiscrete	Individual_Q	1.0	0.05	2500000	True	4	True	IndivQLearningSlugsTerminateOnCollision/134_13_4_none	none			0.05
IndivQLearningSlugsTerminateOnCollision/135_13_5	slugs_decentralized	shields/general_shield	True	-10	False	True	GridWorld	MIT	FullObsDiscrete	Individual_Q	1.0	0.05	2500000	True	5	True	IndivQLearningSlugsTerminateOnCollision/135_13_5_slugs_centralized	slugs_centralized	shields/general_shield		0.05
IndivQLearningSlugsTerminateOnCollision/135_13_5	slugs_decentralized	shields/general_shield	True	-10	False	True	GridWorld	MIT	FullObsDiscrete	Individual_Q	1.0	0.05	2500000	True	5	True	IndivQLearningSlugsTerminateOnCollision/135_13_5_slugs_decentralized	slugs_decentralized	shields/general_shield	False	0.05
IndivQLearningSlugsTerminateOnCollision/135_13_5	slugs_decentralized	shields/general_shield	True	-10	False	True	GridWorld	MIT	FullObsDiscrete	Individual_Q	1.0	0.05	2500000	True	5	True	IndivQLearningSlugsTerminateOnCollision/135_13_5_none	none			0.05
IndivQLearningSlugsTerminateOnCollision/136_13_6	slugs_decentralized	shields/general_shield	True	-10	False	True	GridWorld	MIT	FullObsDiscrete	Individual_Q	1.0	0.05	2500000	True	6	True	IndivQLearningSlugsTerminateOnCollision/136_13_6_slugs_centralized	slugs_centralized	shields/general_shield		0.05
IndivQLearningSlugsTerminateOnCollision/136_13_6	slugs_decentralized	shields/general_shield	True	-10	False	True	GridWorld	MIT	FullObsDiscrete	Individual_Q	1.0	0.05	2500000	True	6	True	IndivQLearningSlugsTerminateOnCollision/136_13_6_slugs_decentralized	slugs_decentralized	shields/general_shield	False	0.05
IndivQLearningSlugsTerminateOnCollision/136_13_6	slugs_decentralized	shields/general_shield	True	-10	False	True	GridWorld	MIT	FullObsDiscrete	Individual_Q	1.0	0.05	2500000	True	6	True	IndivQLearningSlugsTerminateOnCollision/136_13_6_none	none			0.05
IndivQLearningSlugsTerminateOnCollision/137_13_7	slugs_decentralized	shields/general_shield	True	-10	False	True	GridWorld	MIT	FullObsDiscrete	Individual_Q	1.0	0.05	2500000	True	7	True	IndivQLearningSlugsTerminateOnCollision/137_13_7_slugs_centralized	slugs_centralized	shields/general_shield		0.05
IndivQLearningSlugsTerminateOnCollision/137_13_7	slugs_decentralized	shields/general_shield	True	-10	False	True	GridWorld	MIT	FullObsDiscrete	Individual_Q	1.0	0.05	2500000	True	7	True	IndivQLearningSlugsTerminateOnCollision/137_13_7_slugs_decentralized	slugs_decentralized	shields/general_shield	False	0.05
IndivQLearningSlugsTerminateOnCollision/137_13_7	slugs_decentralized	shields/general_shield	True	-10	False	True	GridWorld	MIT	FullObsDiscrete	Individual_Q	1.0	0.05	2500000	True	7	True	IndivQLearningSlugsTerminateOnCollision/137_13_7_none	none			0.05
IndivQLearningSlugsTerminateOnCollision/138_13_8	slugs_decentralized	shields/general_shield	True	-10	False	True	GridWorld	MIT	FullObsDiscrete	Individual_Q	1.0	0.05	2500000	True	8	True	IndivQLearningSlugsTerminateOnCollision/138_13_8_slugs_centralized	slugs_centralized	shields/general_shield		0.05
IndivQLearningSlugsTerminateOnCollision/138_13_8	slugs_decentralized	shields/general_shield	True	-10	False	True	GridWorld	MIT	FullObsDiscrete	Individual_Q	1.0	0.05	2500000	True	8	True	IndivQLearningSlugsTerminateOnCollision/138_13_8_slugs_decentralized	slugs_decentralized	shields/general_shield	False	0.05
IndivQLearningSlugsTerminateOnCollision/138_13_8	slugs_decentralized	shields/general_shield	True	-10	False	True	GridWorld	MIT	FullObsDiscrete	Individual_Q	1.0	0.05	2500000	True	8	True	IndivQLearningSlugsTerminateOnCollision/138_13_8_none	none			0.05
IndivQLearningSlugsTerminateOnCollision/139_13_9	slugs_decentralized	shields/general_shield	True	-10	False	True	GridWorld	MIT	FullObsDiscrete	Individual_Q	1.0	0.05	2500000	True	9	True	IndivQLearningSlugsTerminateOnCollision/139_13_9_slugs_centralized	slugs_centralized	shields/general_shield		0.05
IndivQLearningSlugsTerminateOnCollision/139_13_9	slugs_decentralized	shields/general_shield	True	-10	False	True	GridWorld	MIT	FullObsDiscrete	Individual_Q	1.0	0.05	2500000	True	9	True	IndivQLearningSlugsTerminateOnCollision/139_13_9_slugs_decentralized	slugs_decentralized	shields/general_shield	False	0.05
IndivQLearningSlugsTerminateOnCollision/139_13_9	slugs_decentralized	shields/general_shield	True	-10	False	True	GridWorld	MIT	FullObsDiscrete	Individual_Q	1.0	0.05	2500000	True	9	True	IndivQLearningSlugsTerminateOnCollision/139_13_9_none	none			0.05
IndivQLearningSlugsTerminateOnCollision/140_14_0	none		True	-10		True	GridWorld	MIT	FullObsDiscrete	Individual_Q	1.0	0.05	2500000	True	0	True	IndivQLearningSlugsTerminateOnCollision/140_14_0_slugs_centralized	slugs_centralized	shields/general_shield		0.05
IndivQLearningSlugsTerminateOnCollision/140_14_0	none		True	-10		True	GridWorld	MIT	FullObsDiscrete	Individual_Q	1.0	0.05	2500000	True	0	True	IndivQLearningSlugsTerminateOnCollision/140_14_0_slugs_decentralized	slugs_decentralized	shields/general_shield	False	0.05
IndivQLearningSlugsTerminateOnCollision/140_14_0	none		True	-10		True	GridWorld	MIT	FullObsDiscrete	Individual_Q	1.0	0.05	2500000	True	0	True	IndivQLearningSlugsTerminateOnCollision/140_14_0_none	none			0.05
IndivQLearningSlugsTerminateOnCollision/141_14_1	none		True	-10		True	GridWorld	MIT	FullObsDiscrete	Individual_Q	1.0	0.05	2500000	True	1	True	IndivQLearningSlugsTerminateOnCollision/141_14_1_slugs_centralized	slugs_centralized	shields/general_shield		0.05
IndivQLearningSlugsTerminateOnCollision/141_14_1	none		True	-10		True	GridWorld	MIT	FullObsDiscrete	Individual_Q	1.0	0.05	2500000	True	1	True	IndivQLearningSlugsTerminateOnCollision/141_14_1_slugs_decentralized	slugs_decentralized	shields/general_shield	False	0.05
IndivQLearningSlugsTerminateOnCollision/141_14_1	none		True	-10		True	GridWorld	MIT	FullObsDiscrete	Individual_Q	1.0	0.05	2500000	True	1	True	IndivQLearningSlugsTerminateOnCollision/141_14_1_none	none			0.05
IndivQLearningSlugsTerminateOnCollision/142_14_2	none		True	-10		True	GridWorld	MIT	FullObsDiscrete	Individual_Q	1.0	0.05	2500000	True	2	True	IndivQLearningSlugsTerminateOnCollision/142_14_2_slugs_centralized	slugs_centralized	shields/general_shield		0.05
IndivQLearningSlugsTerminateOnCollision/142_14_2	none		True	-10		True	GridWorld	MIT	FullObsDiscrete	Individual_Q	1.0	0.05	2500000	True	2	True	IndivQLearningSlugsTerminateOnCollision/142_14_2_slugs_decentralized	slugs_decentralized	shields/general_shield	False	0.05
IndivQLearningSlugsTerminateOnCollision/142_14_2	none		True	-10		True	GridWorld	MIT	FullObsDiscrete	Individual_Q	1.0	0.05	2500000	True	2	True	IndivQLearningSlugsTerminateOnCollision/142_14_2_none	none			0.05
IndivQLearningSlugsTerminateOnCollision/143_14_3	none		True	-10		True	GridWorld	MIT	FullObsDiscrete	Individual_Q	1.0	0.05	2500000	True	3	True	IndivQLearningSlugsTerminateOnCollision/143_14_3_slugs_centralized	slugs_centralized	shields/general_shield		0.05
IndivQLearningSlugsTerminateOnCollision/143_14_3	none		True	-10		True	GridWorld	MIT	FullObsDiscrete	Individual_Q	1.0	0.05	2500000	True	3	True	IndivQLearningSlugsTerminateOnCollision/143_14_3_slugs_decentralized	slugs_decentralized	shields/general_shield	False	0.05
IndivQLearningSlugsTerminateOnCollision/143_14_3	none		True	-10		True	GridWorld	MIT	FullObsDiscrete	Individual_Q	1.0	0.05	2500000	True	3	True	IndivQLearningSlugsTerminateOnCollision/143_14_3_none	none			0.05
IndivQLearningSlugsTerminateOnCollision/144_14_4	none		True	-10		True	GridWorld	MIT	FullObsDiscrete	Individual_Q	1.0	0.05	2500000	True	4	True	IndivQLearningSlugsTerminateOnCollision/144_14_4_slugs_centralized	slugs_centralized	shields/general_shield		0.05
IndivQLearningSlugsTerminateOnCollision/144_14_4	none		True	-10		True	GridWorld	MIT	FullObsDiscrete	Individual_Q	1.0	0.05	2500000	True	4	True	IndivQLearningSlugsTerminateOnCollision/144_14_4_slugs_decentralized	slugs_decentralized	shields/general_shield	False	0.05
IndivQLearningSlugsTerminateOnCollision/144_14_4	none		True	-10		True	GridWorld	MIT	FullObsDiscrete	Individual_Q	1.0	0.05	2500000	True	4	True	IndivQLearningSlugsTerminateOnCollision/144_14_4_none	none			0.05
IndivQLearningSlugsTerminateOnCollision/145_14_5	none		True	-10		True	GridWorld	MIT	FullObsDiscrete	Individual_Q	1.0	0.05	2500000	True	5	True	IndivQLearningSlugsTerminateOnCollision/145_14_5_slugs_centralized	slugs_centralized	shields/general_shield		0.05
IndivQLearningSlugsTerminateOnCollision/145_14_5	none		True	-10		True	GridWorld	MIT	FullObsDiscrete	Individual_Q	1.0	0.05	2500000	True	5	True	IndivQLearningSlugsTerminateOnCollision/145_14_5_slugs_decentralized	slugs_decentralized	shields/general_shield	False	0.05
IndivQLearningSlugsTerminateOnCollision/145_14_5	none		True	-10		True	GridWorld	MIT	FullObsDiscrete	Individual_Q	1.0	0.05	2500000	True	5	True	IndivQLearningSlugsTerminateOnCollision/145_14_5_none	none			0.05
IndivQLearningSlugsTerminateOnCollision/146_14_6	none		True	-10		True	GridWorld	MIT	FullObsDiscrete	Individual_Q	1.0	0.05	2500000	True	6	True	IndivQLearningSlugsTerminateOnCollision/146_14_6_slugs_centralized	slugs_centralized	shields/general_shield		0.05
IndivQLearningSlugsTerminateOnCollision/146_14_6	none		True	-10		True	GridWorld	MIT	FullObsDiscrete	Individual_Q	1.0	0.05	2500000	True	6	True	IndivQLearningSlugsTerminateOnCollision/146_14_6_slugs_decentralized	slugs_decentralized	shields/general_shield	False	0.05
IndivQLearningSlugsTerminateOnCollision/146_14_6	none		True	-10		True	GridWorld	MIT	FullObsDiscrete	Individual_Q	1.0	0.05	2500000	True	6	True	IndivQLearningSlugsTerminateOnCollision/146_14_6_none	none			0.05
IndivQLearningSlugsTerminateOnCollision/147_14_7	none		True	-10		True	GridWorld	MIT	FullObsDiscrete	Individual_Q	1.0	0.05	2500000	True	7	True	IndivQLearningSlugsTerminateOnCollision/147_14_7_slugs_centralized	slugs_centralized	shields/general_shield		0.05
IndivQLearningSlugsTerminateOnCollision/147_14_7	none		True	-10		True	GridWorld	MIT	FullObsDiscrete	Individual_Q	1.0	0.05	2500000	True	7	True	IndivQLearningSlugsTerminateOnCollision/147_14_7_slugs_decentralized	slugs_decentralized	shields/general_shield	False	0.05
IndivQLearningSlugsTerminateOnCollision/147_14_7	none		True	-10		True	GridWorld	MIT	FullObsDiscrete	Individual_Q	1.0	0.05	2500000	True	7	True	IndivQLearningSlugsTerminateOnCollision/147_14_7_none	none			0.05
IndivQLearningSlugsTerminateOnCollision/148_14_8	none		True	-10		True	GridWorld	MIT	FullObsDiscrete	Individual_Q	1.0	0.05	2500000	True	8	True	IndivQLearningSlugsTerminateOnCollision/148_14_8_slugs_centralized	slugs_centralized	shields/general_shield		0.05
IndivQLearningSlugsTerminateOnCollision/148_14_8	none		True	-10		True	GridWorld	MIT	FullObsDiscrete	Individual_Q	1.0	0.05	2500000	True	8	True	IndivQLearningSlugsTerminateOnCollision/148_14_8_slugs_decentralized	slugs_decentralized	shields/general_shield	False	0.05
IndivQLearningSlugsTerminateOnCollision/148_14_8	none		True	-10		True	GridWorld	MIT	FullObsDiscrete	Individual_Q	1.0	0.05	2500000	True	8	True	IndivQLearningSlugsTerminateOnCollision/148_14_8_none	none			0.05
IndivQLearningSlugsTerminateOnCollision/149_14_9	none		True	-10		True	GridWorld	MIT	FullObsDiscrete	Individual_Q	1.0	0.05	2500000	True	9	True	IndivQLearningSlugsTerminateOnCollision/149_14_9_slugs_centralized	slugs_centralized	shields/general_shield		0.05
IndivQLearningSlugsTerminateOnCollision/149_14_9	none		True	-10		True	GridWorld	MIT	FullObsDiscrete	Individual_Q	1.0	0.05	2500000	True	9	True	IndivQLearningSlugsTerminateOnCollision/149_14_9_slugs_decentralized	slugs_decentralized	shields/general_shield	False	0.05
IndivQLearningSlugsTerminateOnCollision/149_14_9	none		True	-10		True	GridWorld	MIT	FullObsDiscrete	Individual_Q	1.0	0.05	2500000	True	9	True	IndivQLearningSlugsTerminateOnCollision/149_14_9_none	none			0.05
IndivQLearningSlugsTerminateOnCollision/150_15_0	slugs_centralized	shields/general_shield	True	-10		False	GridWorld	MIT	FullObsDiscrete	Individual_Q	1.0	0.05	2500000	True	0	True	IndivQLearningSlugsTerminateOnCollision/150_15_0_slugs_centralized	slugs_centralized	shields/general_shield		0.05
IndivQLearningSlugsTerminateOnCollision/150_15_0	slugs_centralized	shields/general_shield	True	-10		False	GridWorld	MIT	FullObsDiscrete	Individual_Q	1.0	0.05	2500000	True	0	True	IndivQLearningSlugsTerminateOnCollision/150_15_0_slugs_decentralized	slugs_decentralized	shields/general_shield	False	0.05
IndivQLearningSlugsTerminateOnCollision/150_15_0	slugs_centralized	shields/general_shield	True	-10		False	GridWorld	MIT	FullObsDiscrete	Individual_Q	1.0	0.05	2500000	True	0	True	IndivQLearningSlugsTerminateOnCollision/150_15_0_none	none			0.05
IndivQLearningSlugsTerminateOnCollision/151_15_1	slugs_centralized	shields/general_shield	True	-10		False	GridWorld	MIT	FullObsDiscrete	Individual_Q	1.0	0.05	2500000	True	1	True	IndivQLearningSlugsTerminateOnCollision/151_15_1_slugs_centralized	slugs_centralized	shields/general_shield		0.05
IndivQLearningSlugsTerminateOnCollision/151_15_1	slugs_centralized	shields/general_shield	True	-10		False	GridWorld	MIT	FullObsDiscrete	Individual_Q	1.0	0.05	2500000	True	1	True	IndivQLearningSlugsTerminateOnCollision/151_15_1_slugs_decentralized	slugs_decentralized	shields/general_shield	False	0.05
IndivQLearningSlugsTerminateOnCollision/151_15_1	slugs_centralized	shields/general_shield	True	-10		False	GridWorld	MIT	FullObsDiscrete	Individual_Q	1.0	0.05	2500000	True	1	True	IndivQLearningSlugsTerminateOnCollision/151_15_1_none	none			0.05
IndivQLearningSlugsTerminateOnCollision/152_15_2	slugs_centralized	shields/general_shield	True	-10		False	GridWorld	MIT	FullObsDiscrete	Individual_Q	1.0	0.05	2500000	True	2	True	IndivQLearningSlugsTerminateOnCollision/152_15_2_slugs_centralized	slugs_centralized	shields/general_shield		0.05
IndivQLearningSlugsTerminateOnCollision/152_15_2	slugs_centralized	shields/general_shield	True	-10		False	GridWorld	MIT	FullObsDiscrete	Individual_Q	1.0	0.05	2500000	True	2	True	IndivQLearningSlugsTerminateOnCollision/152_15_2_slugs_decentralized	slugs_decentralized	shields/general_shield	False	0.05
IndivQLearningSlugsTerminateOnCollision/152_15_2	slugs_centralized	shields/general_shield	True	-10		False	GridWorld	MIT	FullObsDiscrete	Individual_Q	1.0	0.05	2500000	True	2	True	IndivQLearningSlugsTerminateOnCollision/152_15_2_none	none			0.05
IndivQLearningSlugsTerminateOnCollision/153_15_3	slugs_centralized	shields/general_shield	True	-10		False	GridWorld	MIT	FullObsDiscrete	Individual_Q	1.0	0.05	2500000	True	3	True	IndivQLearningSlugsTerminateOnCollision/153_15_3_slugs_centralized	slugs_centralized	shields/general_shield		0.05
IndivQLearningSlugsTerminateOnCollision/153_15_3	slugs_centralized	shields/general_shield	True	-10		False	GridWorld	MIT	FullObsDiscrete	Individual_Q	1.0	0.05	2500000	True	3	True	IndivQLearningSlugsTerminateOnCollision/153_15_3_slugs_decentralized	slugs_decentralized	shields/general_shield	False	0.05
IndivQLearningSlugsTerminateOnCollision/153_15_3	slugs_centralized	shields/general_shield	True	-10		False	GridWorld	MIT	FullObsDiscrete	Individual_Q	1.0	0.05	2500000	True	3	True	IndivQLearningSlugsTerminateOnCollision/153_15_3_none	none			0.05
IndivQLearningSlugsTerminateOnCollision/154_15_4	slugs_centralized	shields/general_shield	True	-10		False	GridWorld	MIT	FullObsDiscrete	Individual_Q	1.0	0.05	2500000	True	4	True	IndivQLearningSlugsTerminateOnCollision/154_15_4_slugs_centralized	slugs_centralized	shields/general_shield		0.05
IndivQLearningSlugsTerminateOnCollision/154_15_4	slugs_centralized	shields/general_shield	True	-10		False	GridWorld	MIT	FullObsDiscrete	Individual_Q	1.0	0.05	2500000	True	4	True	IndivQLearningSlugsTerminateOnCollision/154_15_4_slugs_decentralized	slugs_decentralized	shields/general_shield	False	0.05
IndivQLearningSlugsTerminateOnCollision/154_15_4	slugs_centralized	shields/general_shield	True	-10		False	GridWorld	MIT	FullObsDiscrete	Individual_Q	1.0	0.05	2500000	True	4	True	IndivQLearningSlugsTerminateOnCollision/154_15_4_none	none			0.05
IndivQLearningSlugsTerminateOnCollision/155_15_5	slugs_centralized	shields/general_shield	True	-10		False	GridWorld	MIT	FullObsDiscrete	Individual_Q	1.0	0.05	2500000	True	5	True	IndivQLearningSlugsTerminateOnCollision/155_15_5_slugs_centralized	slugs_centralized	shields/general_shield		0.05
IndivQLearningSlugsTerminateOnCollision/155_15_5	slugs_centralized	shields/general_shield	True	-10		False	GridWorld	MIT	FullObsDiscrete	Individual_Q	1.0	0.05	2500000	True	5	True	IndivQLearningSlugsTerminateOnCollision/155_15_5_slugs_decentralized	slugs_decentralized	shields/general_shield	False	0.05
IndivQLearningSlugsTerminateOnCollision/155_15_5	slugs_centralized	shields/general_shield	True	-10		False	GridWorld	MIT	FullObsDiscrete	Individual_Q	1.0	0.05	2500000	True	5	True	IndivQLearningSlugsTerminateOnCollision/155_15_5_none	none			0.05
IndivQLearningSlugsTerminateOnCollision/156_15_6	slugs_centralized	shields/general_shield	True	-10		False	GridWorld	MIT	FullObsDiscrete	Individual_Q	1.0	0.05	2500000	True	6	True	IndivQLearningSlugsTerminateOnCollision/156_15_6_slugs_centralized	slugs_centralized	shields/general_shield		0.05
IndivQLearningSlugsTerminateOnCollision/156_15_6	slugs_centralized	shields/general_shield	True	-10		False	GridWorld	MIT	FullObsDiscrete	Individual_Q	1.0	0.05	2500000	True	6	True	IndivQLearningSlugsTerminateOnCollision/156_15_6_slugs_decentralized	slugs_decentralized	shields/general_shield	False	0.05
IndivQLearningSlugsTerminateOnCollision/156_15_6	slugs_centralized	shields/general_shield	True	-10		False	GridWorld	MIT	FullObsDiscrete	Individual_Q	1.0	0.05	2500000	True	6	True	IndivQLearningSlugsTerminateOnCollision/156_15_6_none	none			0.05
IndivQLearningSlugsTerminateOnCollision/157_15_7	slugs_centralized	shields/general_shield	True	-10		False	GridWorld	MIT	FullObsDiscrete	Individual_Q	1.0	0.05	2500000	True	7	True	IndivQLearningSlugsTerminateOnCollision/157_15_7_slugs_centralized	slugs_centralized	shields/general_shield		0.05
IndivQLearningSlugsTerminateOnCollision/157_15_7	slugs_centralized	shields/general_shield	True	-10		False	GridWorld	MIT	FullObsDiscrete	Individual_Q	1.0	0.05	2500000	True	7	True	IndivQLearningSlugsTerminateOnCollision/157_15_7_slugs_decentralized	slugs_decentralized	shields/general_shield	False	0.05
IndivQLearningSlugsTerminateOnCollision/157_15_7	slugs_centralized	shields/general_shield	True	-10		False	GridWorld	MIT	FullObsDiscrete	Individual_Q	1.0	0.05	2500000	True	7	True	IndivQLearningSlugsTerminateOnCollision/157_15_7_none	none			0.05
IndivQLearningSlugsTerminateOnCollision/158_15_8	slugs_centralized	shields/general_shield	True	-10		False	GridWorld	MIT	FullObsDiscrete	Individual_Q	1.0	0.05	2500000	True	8	True	IndivQLearningSlugsTerminateOnCollision/158_15_8_slugs_centralized	slugs_centralized	shields/general_shield		0.05
IndivQLearningSlugsTerminateOnCollision/158_15_8	slugs_centralized	shields/general_shield	True	-10		False	GridWorld	MIT	FullObsDiscrete	Individual_Q	1.0	0.05	2500000	True	8	True	IndivQLearningSlugsTerminateOnCollision/158_15_8_slugs_decentralized	slugs_decentralized	shields/general_shield	False	0.05
IndivQLearningSlugsTerminateOnCollision/158_15_8	slugs_centralized	shields/general_shield	True	-10		False	GridWorld	MIT	FullObsDiscrete	Individual_Q	1.0	0.05	2500000	True	8	True	IndivQLearningSlugsTerminateOnCollision/158_15_8_none	none			0.05
IndivQLearningSlugsTerminateOnCollision/159_15_9	slugs_centralized	shields/general_shield	True	-10		False	GridWorld	MIT	FullObsDiscrete	Individual_Q	1.0	0.05	2500000	True	9	True	IndivQLearningSlugsTerminateOnCollision/159_15_9_slugs_centralized	slugs_centralized	shields/general_shield		0.05
IndivQLearningSlugsTerminateOnCollision/159_15_9	slugs_centralized	shields/general_shield	True	-10		False	GridWorld	MIT	FullObsDiscrete	Individual_Q	1.0	0.05	2500000	True	9	True	IndivQLearningSlugsTerminateOnCollision/159_15_9_slugs_decentralized	slugs_decentralized	shields/general_shield	False	0.05
IndivQLearningSlugsTerminateOnCollision/159_15_9	slugs_centralized	shields/general_shield	True	-10		False	GridWorld	MIT	FullObsDiscrete	Individual_Q	1.0	0.05	2500000	True	9	True	IndivQLearningSlugsTerminateOnCollision/159_15_9_none	none			0.05
IndivQLearningSlugsTerminateOnCollision/160_16_0	slugs_decentralized	shields/general_shield	True	-10	False	False	GridWorld	MIT	FullObsDiscrete	Individual_Q	1.0	0.05	2500000	True	0	True	IndivQLearningSlugsTerminateOnCollision/160_16_0_slugs_centralized	slugs_centralized	shields/general_shield		0.05
IndivQLearningSlugsTerminateOnCollision/160_16_0	slugs_decentralized	shields/general_shield	True	-10	False	False	GridWorld	MIT	FullObsDiscrete	Individual_Q	1.0	0.05	2500000	True	0	True	IndivQLearningSlugsTerminateOnCollision/160_16_0_slugs_decentralized	slugs_decentralized	shields/general_shield	False	0.05
IndivQLearningSlugsTerminateOnCollision/160_16_0	slugs_decentralized	shields/general_shield	True	-10	False	False	GridWorld	MIT	FullObsDiscrete	Individual_Q	1.0	0.05	2500000	True	0	True	IndivQLearningSlugsTerminateOnCollision/160_16_0_none	none			0.05
IndivQLearningSlugsTerminateOnCollision/161_16_1	slugs_decentralized	shields/general_shield	True	-10	False	False	GridWorld	MIT	FullObsDiscrete	Individual_Q	1.0	0.05	2500000	True	1	True	IndivQLearningSlugsTerminateOnCollision/161_16_1_slugs_centralized	slugs_centralized	shields/general_shield		0.05
IndivQLearningSlugsTerminateOnCollision/161_16_1	slugs_decentralized	shields/general_shield	True	-10	False	False	GridWorld	MIT	FullObsDiscrete	Individual_Q	1.0	0.05	2500000	True	1	True	IndivQLearningSlugsTerminateOnCollision/161_16_1_slugs_decentralized	slugs_decentralized	shields/general_shield	False	0.05
IndivQLearningSlugsTerminateOnCollision/161_16_1	slugs_decentralized	shields/general_shield	True	-10	False	False	GridWorld	MIT	FullObsDiscrete	Individual_Q	1.0	0.05	2500000	True	1	True	IndivQLearningSlugsTerminateOnCollision/161_16_1_none	none			0.05
IndivQLearningSlugsTerminateOnCollision/162_16_2	slugs_decentralized	shields/general_shield	True	-10	False	False	GridWorld	MIT	FullObsDiscrete	Individual_Q	1.0	0.05	2500000	True	2	True	IndivQLearningSlugsTerminateOnCollision/162_16_2_slugs_centralized	slugs_centralized	shields/general_shield		0.05
IndivQLearningSlugsTerminateOnCollision/162_16_2	slugs_decentralized	shields/general_shield	True	-10	False	False	GridWorld	MIT	FullObsDiscrete	Individual_Q	1.0	0.05	2500000	True	2	True	IndivQLearningSlugsTerminateOnCollision/162_16_2_slugs_decentralized	slugs_decentralized	shields/general_shield	False	0.05
IndivQLearningSlugsTerminateOnCollision/162_16_2	slugs_decentralized	shields/general_shield	True	-10	False	False	GridWorld	MIT	FullObsDiscrete	Individual_Q	1.0	0.05	2500000	True	2	True	IndivQLearningSlugsTerminateOnCollision/162_16_2_none	none			0.05
IndivQLearningSlugsTerminateOnCollision/163_16_3	slugs_decentralized	shields/general_shield	True	-10	False	False	GridWorld	MIT	FullObsDiscrete	Individual_Q	1.0	0.05	2500000	True	3	True	IndivQLearningSlugsTerminateOnCollision/163_16_3_slugs_centralized	slugs_centralized	shields/general_shield		0.05
IndivQLearningSlugsTerminateOnCollision/163_16_3	slugs_decentralized	shields/general_shield	True	-10	False	False	GridWorld	MIT	FullObsDiscrete	Individual_Q	1.0	0.05	2500000	True	3	True	IndivQLearningSlugsTerminateOnCollision/163_16_3_slugs_decentralized	slugs_decentralized	shields/general_shield	False	0.05
IndivQLearningSlugsTerminateOnCollision/163_16_3	slugs_decentralized	shields/general_shield	True	-10	False	False	GridWorld	MIT	FullObsDiscrete	Individual_Q	1.0	0.05	2500000	True	3	True	IndivQLearningSlugsTerminateOnCollision/163_16_3_none	none			0.05
IndivQLearningSlugsTerminateOnCollision/164_16_4	slugs_decentralized	shields/general_shield	True	-10	False	False	GridWorld	MIT	FullObsDiscrete	Individual_Q	1.0	0.05	2500000	True	4	True	IndivQLearningSlugsTerminateOnCollision/164_16_4_slugs_centralized	slugs_centralized	shields/general_shield		0.05
IndivQLearningSlugsTerminateOnCollision/164_16_4	slugs_decentralized	shields/general_shield	True	-10	False	False	GridWorld	MIT	FullObsDiscrete	Individual_Q	1.0	0.05	2500000	True	4	True	IndivQLearningSlugsTerminateOnCollision/164_16_4_slugs_decentralized	slugs_decentralized	shields/general_shield	False	0.05
IndivQLearningSlugsTerminateOnCollision/164_16_4	slugs_decentralized	shields/general_shield	True	-10	False	False	GridWorld	MIT	FullObsDiscrete	Individual_Q	1.0	0.05	2500000	True	4	True	IndivQLearningSlugsTerminateOnCollision/164_16_4_none	none			0.05
IndivQLearningSlugsTerminateOnCollision/165_16_5	slugs_decentralized	shields/general_shield	True	-10	False	False	GridWorld	MIT	FullObsDiscrete	Individual_Q	1.0	0.05	2500000	True	5	True	IndivQLearningSlugsTerminateOnCollision/165_16_5_slugs_centralized	slugs_centralized	shields/general_shield		0.05
IndivQLearningSlugsTerminateOnCollision/165_16_5	slugs_decentralized	shields/general_shield	True	-10	False	False	GridWorld	MIT	FullObsDiscrete	Individual_Q	1.0	0.05	2500000	True	5	True	IndivQLearningSlugsTerminateOnCollision/165_16_5_slugs_decentralized	slugs_decentralized	shields/general_shield	False	0.05
IndivQLearningSlugsTerminateOnCollision/165_16_5	slugs_decentralized	shields/general_shield	True	-10	False	False	GridWorld	MIT	FullObsDiscrete	Individual_Q	1.0	0.05	2500000	True	5	True	IndivQLearningSlugsTerminateOnCollision/165_16_5_none	none			0.05
IndivQLearningSlugsTerminateOnCollision/166_16_6	slugs_decentralized	shields/general_shield	True	-10	False	False	GridWorld	MIT	FullObsDiscrete	Individual_Q	1.0	0.05	2500000	True	6	True	IndivQLearningSlugsTerminateOnCollision/166_16_6_slugs_centralized	slugs_centralized	shields/general_shield		0.05
IndivQLearningSlugsTerminateOnCollision/166_16_6	slugs_decentralized	shields/general_shield	True	-10	False	False	GridWorld	MIT	FullObsDiscrete	Individual_Q	1.0	0.05	2500000	True	6	True	IndivQLearningSlugsTerminateOnCollision/166_16_6_slugs_decentralized	slugs_decentralized	shields/general_shield	False	0.05
IndivQLearningSlugsTerminateOnCollision/166_16_6	slugs_decentralized	shields/general_shield	True	-10	False	False	GridWorld	MIT	FullObsDiscrete	Individual_Q	1.0	0.05	2500000	True	6	True	IndivQLearningSlugsTerminateOnCollision/166_16_6_none	none			0.05
IndivQLearningSlugsTerminateOnCollision/167_16_7	slugs_decentralized	shields/general_shield	True	-10	False	False	GridWorld	MIT	FullObsDiscrete	Individual_Q	1.0	0.05	2500000	True	7	True	IndivQLearningSlugsTerminateOnCollision/167_16_7_slugs_centralized	slugs_centralized	shields/general_shield		0.05
IndivQLearningSlugsTerminateOnCollision/167_16_7	slugs_decentralized	shields/general_shield	True	-10	False	False	GridWorld	MIT	FullObsDiscrete	Individual_Q	1.0	0.05	2500000	True	7	True	IndivQLearningSlugsTerminateOnCollision/167_16_7_slugs_decentralized	slugs_decentralized	shields/general_shield	False	0.05
IndivQLearningSlugsTerminateOnCollision/167_16_7	slugs_decentralized	shields/general_shield	True	-10	False	False	GridWorld	MIT	FullObsDiscrete	Individual_Q	1.0	0.05	2500000	True	7	True	IndivQLearningSlugsTerminateOnCollision/167_16_7_none	none			0.05
IndivQLearningSlugsTerminateOnCollision/168_16_8	slugs_decentralized	shields/general_shield	True	-10	False	False	GridWorld	MIT	FullObsDiscrete	Individual_Q	1.0	0.05	2500000	True	8	True	IndivQLearningSlugsTerminateOnCollision/168_16_8_slugs_centralized	slugs_centralized	shields/general_shield		0.05
IndivQLearningSlugsTerminateOnCollision/168_16_8	slugs_decentralized	shields/general_shield	True	-10	False	False	GridWorld	MIT	FullObsDiscrete	Individual_Q	1.0	0.05	2500000	True	8	True	IndivQLearningSlugsTerminateOnCollision/168_16_8_slugs_decentralized	slugs_decentralized	shields/general_shield	False	0.05
IndivQLearningSlugsTerminateOnCollision/168_16_8	slugs_decentralized	shields/general_shield	True	-10	False	False	GridWorld	MIT	FullObsDiscrete	Individual_Q	1.0	0.05	2500000	True	8	True	IndivQLearningSlugsTerminateOnCollision/168_16_8_none	none			0.05
IndivQLearningSlugsTerminateOnCollision/169_16_9	slugs_decentralized	shields/general_shield	True	-10	False	False	GridWorld	MIT	FullObsDiscrete	Individual_Q	1.0	0.05	2500000	True	9	True	IndivQLearningSlugsTerminateOnCollision/169_16_9_slugs_centralized	slugs_centralized	shields/general_shield		0.05
IndivQLearningSlugsTerminateOnCollision/169_16_9	slugs_decentralized	shields/general_shield	True	-10	False	False	GridWorld	MIT	FullObsDiscrete	Individual_Q	1.0	0.05	2500000	True	9	True	IndivQLearningSlugsTerminateOnCollision/169_16_9_slugs_decentralized	slugs_decentralized	shields/general_shield	False	0.05
IndivQLearningSlugsTerminateOnCollision/169_16_9	slugs_decentralized	shields/general_shield	True	-10	False	False	GridWorld	MIT	FullObsDiscrete	Individual_Q	1.0	0.05	2500000	True	9	True	IndivQLearningSlugsTerminateOnCollision/169_16_9_none	none			0.05
IndivQLearningSlugsTerminateOnCollision/170_17_0	none		True	-10		False	GridWorld	MIT	FullObsDiscrete	Individual_Q	1.0	0.05	2500000	True	0	True	IndivQLearningSlugsTerminateOnCollision/170_17_0_slugs_centralized	slugs_centralized	shields/general_shield		0.05
IndivQLearningSlugsTerminateOnCollision/170_17_0	none		True	-10		False	GridWorld	MIT	FullObsDiscrete	Individual_Q	1.0	0.05	2500000	True	0	True	IndivQLearningSlugsTerminateOnCollision/170_17_0_slugs_decentralized	slugs_decentralized	shields/general_shield	False	0.05
IndivQLearningSlugsTerminateOnCollision/170_17_0	none		True	-10		False	GridWorld	MIT	FullObsDiscrete	Individual_Q	1.0	0.05	2500000	True	0	True	IndivQLearningSlugsTerminateOnCollision/170_17_0_none	none			0.05
IndivQLearningSlugsTerminateOnCollision/171_17_1	none		True	-10		False	GridWorld	MIT	FullObsDiscrete	Individual_Q	1.0	0.05	2500000	True	1	True	IndivQLearningSlugsTerminateOnCollision/171_17_1_slugs_centralized	slugs_centralized	shields/general_shield		0.05
IndivQLearningSlugsTerminateOnCollision/171_17_1	none		True	-10		False	GridWorld	MIT	FullObsDiscrete	Individual_Q	1.0	0.05	2500000	True	1	True	IndivQLearningSlugsTerminateOnCollision/171_17_1_slugs_decentralized	slugs_decentralized	shields/general_shield	False	0.05
IndivQLearningSlugsTerminateOnCollision/171_17_1	none		True	-10		False	GridWorld	MIT	FullObsDiscrete	Individual_Q	1.0	0.05	2500000	True	1	True	IndivQLearningSlugsTerminateOnCollision/171_17_1_none	none			0.05
IndivQLearningSlugsTerminateOnCollision/172_17_2	none		True	-10		False	GridWorld	MIT	FullObsDiscrete	Individual_Q	1.0	0.05	2500000	True	2	True	IndivQLearningSlugsTerminateOnCollision/172_17_2_slugs_centralized	slugs_centralized	shields/general_shield		0.05
IndivQLearningSlugsTerminateOnCollision/172_17_2	none		True	-10		False	GridWorld	MIT	FullObsDiscrete	Individual_Q	1.0	0.05	2500000	True	2	True	IndivQLearningSlugsTerminateOnCollision/172_17_2_slugs_decentralized	slugs_decentralized	shields/general_shield	False	0.05
IndivQLearningSlugsTerminateOnCollision/172_17_2	none		True	-10		False	GridWorld	MIT	FullObsDiscrete	Individual_Q	1.0	0.05	2500000	True	2	True	IndivQLearningSlugsTerminateOnCollision/172_17_2_none	none			0.05
IndivQLearningSlugsTerminateOnCollision/173_17_3	none		True	-10		False	GridWorld	MIT	FullObsDiscrete	Individual_Q	1.0	0.05	2500000	True	3	True	IndivQLearningSlugsTerminateOnCollision/173_17_3_slugs_centralized	slugs_centralized	shields/general_shield		0.05
IndivQLearningSlugsTerminateOnCollision/173_17_3	none		True	-10		False	GridWorld	MIT	FullObsDiscrete	Individual_Q	1.0	0.05	2500000	True	3	True	IndivQLearningSlugsTerminateOnCollision/173_17_3_slugs_decentralized	slugs_decentralized	shields/general_shield	False	0.05
IndivQLearningSlugsTerminateOnCollision/173_17_3	none		True	-10		False	GridWorld	MIT	FullObsDiscrete	Individual_Q	1.0	0.05	2500000	True	3	True	IndivQLearningSlugsTerminateOnCollision/173_17_3_none	none			0.05
IndivQLearningSlugsTerminateOnCollision/174_17_4	none		True	-10		False	GridWorld	MIT	FullObsDiscrete	Individual_Q	1.0	0.05	2500000	True	4	True	IndivQLearningSlugsTerminateOnCollision/174_17_4_slugs_centralized	slugs_centralized	shields/general_shield		0.05
IndivQLearningSlugsTerminateOnCollision/174_17_4	none		True	-10		False	GridWorld	MIT	FullObsDiscrete	Individual_Q	1.0	0.05	2500000	True	4	True	IndivQLearningSlugsTerminateOnCollision/174_17_4_slugs_decentralized	slugs_decentralized	shields/general_shield	False	0.05
IndivQLearningSlugsTerminateOnCollision/174_17_4	none		True	-10		False	GridWorld	MIT	FullObsDiscrete	Individual_Q	1.0	0.05	2500000	True	4	True	IndivQLearningSlugsTerminateOnCollision/174_17_4_none	none			0.05
IndivQLearningSlugsTerminateOnCollision/175_17_5	none		True	-10		False	GridWorld	MIT	FullObsDiscrete	Individual_Q	1.0	0.05	2500000	True	5	True	IndivQLearningSlugsTerminateOnCollision/175_17_5_slugs_centralized	slugs_centralized	shields/general_shield		0.05
IndivQLearningSlugsTerminateOnCollision/175_17_5	none		True	-10		False	GridWorld	MIT	FullObsDiscrete	Individual_Q	1.0	0.05	2500000	True	5	True	IndivQLearningSlugsTerminateOnCollision/175_17_5_slugs_decentralized	slugs_decentralized	shields/general_shield	False	0.05
IndivQLearningSlugsTerminateOnCollision/175_17_5	none		True	-10		False	GridWorld	MIT	FullObsDiscrete	Individual_Q	1.0	0.05	2500000	True	5	True	IndivQLearningSlugsTerminateOnCollision/175_17_5_none	none			0.05
IndivQLearningSlugsTerminateOnCollision/176_17_6	none		True	-10		False	GridWorld	MIT	FullObsDiscrete	Individual_Q	1.0	0.05	2500000	True	6	True	IndivQLearningSlugsTerminateOnCollision/176_17_6_slugs_centralized	slugs_centralized	shields/general_shield		0.05
IndivQLearningSlugsTerminateOnCollision/176_17_6	none		True	-10		False	GridWorld	MIT	FullObsDiscrete	Individual_Q	1.0	0.05	2500000	True	6	True	IndivQLearningSlugsTerminateOnCollision/176_17_6_slugs_decentralized	slugs_decentralized	shields/general_shield	False	0.05
IndivQLearningSlugsTerminateOnCollision/176_17_6	none		True	-10		False	GridWorld	MIT	FullObsDiscrete	Individual_Q	1.0	0.05	2500000	True	6	True	IndivQLearningSlugsTerminateOnCollision/176_17_6_none	none			0.05
IndivQLearningSlugsTerminateOnCollision/177_17_7	none		True	-10		False	GridWorld	MIT	FullObsDiscrete	Individual_Q	1.0	0.05	2500000	True	7	True	IndivQLearningSlugsTerminateOnCollision/177_17_7_slugs_centralized	slugs_centralized	shields/general_shield		0.05
IndivQLearningSlugsTerminateOnCollision/177_17_7	none		True	-10		False	GridWorld	MIT	FullObsDiscrete	Individual_Q	1.0	0.05	2500000	True	7	True	IndivQLearningSlugsTerminateOnCollision/177_17_7_slugs_decentralized	slugs_decentralized	shields/general_shield	False	0.05
IndivQLearningSlugsTerminateOnCollision/177_17_7	none		True	-10		False	GridWorld	MIT	FullObsDiscrete	Individual_Q	1.0	0.05	2500000	True	7	True	IndivQLearningSlugsTerminateOnCollision/177_17_7_none	none			0.05
IndivQLearningSlugsTerminateOnCollision/178_17_8	none		True	-10		False	GridWorld	MIT	FullObsDiscrete	Individual_Q	1.0	0.05	2500000	True	8	True	IndivQLearningSlugsTerminateOnCollision/178_17_8_slugs_centralized	slugs_centralized	shields/general_shield		0.05
IndivQLearningSlugsTerminateOnCollision/178_17_8	none		True	-10		False	GridWorld	MIT	FullObsDiscrete	Individual_Q	1.0	0.05	2500000	True	8	True	IndivQLearningSlugsTerminateOnCollision/178_17_8_slugs_decentralized	slugs_decentralized	shields/general_shield	False	0.05
IndivQLearningSlugsTerminateOnCollision/178_17_8	none		True	-10		False	GridWorld	MIT	FullObsDiscrete	Individual_Q	1.0	0.05	2500000	True	8	True	IndivQLearningSlugsTerminateOnCollision/178_17_8_none	none			0.05
IndivQLearningSlugsTerminateOnCollision/179_17_9	none		True	-10		False	GridWorld	MIT	FullObsDiscrete	Individual_Q	1.0	0.05	2500000	True	9	True	IndivQLearningSlugsTerminateOnCollision/179_17_9_slugs_centralized	slugs_centralized	shields/general_shield		0.05
IndivQLearningSlugsTerminateOnCollision/179_17_9	none		True	-10		False	GridWorld	MIT	FullObsDiscrete	Individual_Q	1.0	0.05	2500000	True	9	True	IndivQLearningSlugsTerminateOnCollision/179_17_9_slugs_decentralized	slugs_decentralized	shields/general_shield	False	0.05
IndivQLearningSlugsTerminateOnCollision/179_17_9	none		True	-10		False	GridWorld	MIT	FullObsDiscrete	Individual_Q	1.0	0.05	2500000	True	9	True	IndivQLearningSlugsTerminateOnCollision/179_17_9_none	none			0.05
IndivQLearningSlugsTerminateOnCollision/180_18_0	slugs_centralized	shields/general_shield	True	-10		True	GridWorld	SUNY	FullObsDiscrete	Individual_Q	1.0	0.05	2500000	True	0	True	IndivQLearningSlugsTerminateOnCollision/180_18_0_slugs_centralized	slugs_centralized	shields/general_shield		0.05
IndivQLearningSlugsTerminateOnCollision/180_18_0	slugs_centralized	shields/general_shield	True	-10		True	GridWorld	SUNY	FullObsDiscrete	Individual_Q	1.0	0.05	2500000	True	0	True	IndivQLearningSlugsTerminateOnCollision/180_18_0_slugs_decentralized	slugs_decentralized	shields/general_shield	False	0.05
IndivQLearningSlugsTerminateOnCollision/180_18_0	slugs_centralized	shields/general_shield	True	-10		True	GridWorld	SUNY	FullObsDiscrete	Individual_Q	1.0	0.05	2500000	True	0	True	IndivQLearningSlugsTerminateOnCollision/180_18_0_none	none			0.05
IndivQLearningSlugsTerminateOnCollision/181_18_1	slugs_centralized	shields/general_shield	True	-10		True	GridWorld	SUNY	FullObsDiscrete	Individual_Q	1.0	0.05	2500000	True	1	True	IndivQLearningSlugsTerminateOnCollision/181_18_1_slugs_centralized	slugs_centralized	shields/general_shield		0.05
IndivQLearningSlugsTerminateOnCollision/181_18_1	slugs_centralized	shields/general_shield	True	-10		True	GridWorld	SUNY	FullObsDiscrete	Individual_Q	1.0	0.05	2500000	True	1	True	IndivQLearningSlugsTerminateOnCollision/181_18_1_slugs_decentralized	slugs_decentralized	shields/general_shield	False	0.05
IndivQLearningSlugsTerminateOnCollision/181_18_1	slugs_centralized	shields/general_shield	True	-10		True	GridWorld	SUNY	FullObsDiscrete	Individual_Q	1.0	0.05	2500000	True	1	True	IndivQLearningSlugsTerminateOnCollision/181_18_1_none	none			0.05
IndivQLearningSlugsTerminateOnCollision/182_18_2	slugs_centralized	shields/general_shield	True	-10		True	GridWorld	SUNY	FullObsDiscrete	Individual_Q	1.0	0.05	2500000	True	2	True	IndivQLearningSlugsTerminateOnCollision/182_18_2_slugs_centralized	slugs_centralized	shields/general_shield		0.05
IndivQLearningSlugsTerminateOnCollision/182_18_2	slugs_centralized	shields/general_shield	True	-10		True	GridWorld	SUNY	FullObsDiscrete	Individual_Q	1.0	0.05	2500000	True	2	True	IndivQLearningSlugsTerminateOnCollision/182_18_2_slugs_decentralized	slugs_decentralized	shields/general_shield	False	0.05
IndivQLearningSlugsTerminateOnCollision/182_18_2	slugs_centralized	shields/general_shield	True	-10		True	GridWorld	SUNY	FullObsDiscrete	Individual_Q	1.0	0.05	2500000	True	2	True	IndivQLearningSlugsTerminateOnCollision/182_18_2_none	none			0.05
IndivQLearningSlugsTerminateOnCollision/183_18_3	slugs_centralized	shields/general_shield	True	-10		True	GridWorld	SUNY	FullObsDiscrete	Individual_Q	1.0	0.05	2500000	True	3	True	IndivQLearningSlugsTerminateOnCollision/183_18_3_slugs_centralized	slugs_centralized	shields/general_shield		0.05
IndivQLearningSlugsTerminateOnCollision/183_18_3	slugs_centralized	shields/general_shield	True	-10		True	GridWorld	SUNY	FullObsDiscrete	Individual_Q	1.0	0.05	2500000	True	3	True	IndivQLearningSlugsTerminateOnCollision/183_18_3_slugs_decentralized	slugs_decentralized	shields/general_shield	False	0.05
IndivQLearningSlugsTerminateOnCollision/183_18_3	slugs_centralized	shields/general_shield	True	-10		True	GridWorld	SUNY	FullObsDiscrete	Individual_Q	1.0	0.05	2500000	True	3	True	IndivQLearningSlugsTerminateOnCollision/183_18_3_none	none			0.05
IndivQLearningSlugsTerminateOnCollision/184_18_4	slugs_centralized	shields/general_shield	True	-10		True	GridWorld	SUNY	FullObsDiscrete	Individual_Q	1.0	0.05	2500000	True	4	True	IndivQLearningSlugsTerminateOnCollision/184_18_4_slugs_centralized	slugs_centralized	shields/general_shield		0.05
IndivQLearningSlugsTerminateOnCollision/184_18_4	slugs_centralized	shields/general_shield	True	-10		True	GridWorld	SUNY	FullObsDiscrete	Individual_Q	1.0	0.05	2500000	True	4	True	IndivQLearningSlugsTerminateOnCollision/184_18_4_slugs_decentralized	slugs_decentralized	shields/general_shield	False	0.05
IndivQLearningSlugsTerminateOnCollision/184_18_4	slugs_centralized	shields/general_shield	True	-10		True	GridWorld	SUNY	FullObsDiscrete	Individual_Q	1.0	0.05	2500000	True	4	True	IndivQLearningSlugsTerminateOnCollision/184_18_4_none	none			0.05
IndivQLearningSlugsTerminateOnCollision/185_18_5	slugs_centralized	shields/general_shield	True	-10		True	GridWorld	SUNY	FullObsDiscrete	Individual_Q	1.0	0.05	2500000	True	5	True	IndivQLearningSlugsTerminateOnCollision/185_18_5_slugs_centralized	slugs_centralized	shields/general_shield		0.05
IndivQLearningSlugsTerminateOnCollision/185_18_5	slugs_centralized	shields/general_shield	True	-10		True	GridWorld	SUNY	FullObsDiscrete	Individual_Q	1.0	0.05	2500000	True	5	True	IndivQLearningSlugsTerminateOnCollision/185_18_5_slugs_decentralized	slugs_decentralized	shields/general_shield	False	0.05
IndivQLearningSlugsTerminateOnCollision/185_18_5	slugs_centralized	shields/general_shield	True	-10		True	GridWorld	SUNY	FullObsDiscrete	Individual_Q	1.0	0.05	2500000	True	5	True	IndivQLearningSlugsTerminateOnCollision/185_18_5_none	none			0.05
IndivQLearningSlugsTerminateOnCollision/186_18_6	slugs_centralized	shields/general_shield	True	-10		True	GridWorld	SUNY	FullObsDiscrete	Individual_Q	1.0	0.05	2500000	True	6	True	IndivQLearningSlugsTerminateOnCollision/186_18_6_slugs_centralized	slugs_centralized	shields/general_shield		0.05
IndivQLearningSlugsTerminateOnCollision/186_18_6	slugs_centralized	shields/general_shield	True	-10		True	GridWorld	SUNY	FullObsDiscrete	Individual_Q	1.0	0.05	2500000	True	6	True	IndivQLearningSlugsTerminateOnCollision/186_18_6_slugs_decentralized	slugs_decentralized	shields/general_shield	False	0.05
IndivQLearningSlugsTerminateOnCollision/186_18_6	slugs_centralized	shields/general_shield	True	-10		True	GridWorld	SUNY	FullObsDiscrete	Individual_Q	1.0	0.05	2500000	True	6	True	IndivQLearningSlugsTerminateOnCollision/186_18_6_none	none			0.05
IndivQLearningSlugsTerminateOnCollision/187_18_7	slugs_centralized	shields/general_shield	True	-10		True	GridWorld	SUNY	FullObsDiscrete	Individual_Q	1.0	0.05	2500000	True	7	True	IndivQLearningSlugsTerminateOnCollision/187_18_7_slugs_centralized	slugs_centralized	shields/general_shield		0.05
IndivQLearningSlugsTerminateOnCollision/187_18_7	slugs_centralized	shields/general_shield	True	-10		True	GridWorld	SUNY	FullObsDiscrete	Individual_Q	1.0	0.05	2500000	True	7	True	IndivQLearningSlugsTerminateOnCollision/187_18_7_slugs_decentralized	slugs_decentralized	shields/general_shield	False	0.05
IndivQLearningSlugsTerminateOnCollision/187_18_7	slugs_centralized	shields/general_shield	True	-10		True	GridWorld	SUNY	FullObsDiscrete	Individual_Q	1.0	0.05	2500000	True	7	True	IndivQLearningSlugsTerminateOnCollision/187_18_7_none	none			0.05
IndivQLearningSlugsTerminateOnCollision/188_18_8	slugs_centralized	shields/general_shield	True	-10		True	GridWorld	SUNY	FullObsDiscrete	Individual_Q	1.0	0.05	2500000	True	8	True	IndivQLearningSlugsTerminateOnCollision/188_18_8_slugs_centralized	slugs_centralized	shields/general_shield		0.05
IndivQLearningSlugsTerminateOnCollision/188_18_8	slugs_centralized	shields/general_shield	True	-10		True	GridWorld	SUNY	FullObsDiscrete	Individual_Q	1.0	0.05	2500000	True	8	True	IndivQLearningSlugsTerminateOnCollision/188_18_8_slugs_decentralized	slugs_decentralized	shields/general_shield	False	0.05
IndivQLearningSlugsTerminateOnCollision/188_18_8	slugs_centralized	shields/general_shield	True	-10		True	GridWorld	SUNY	FullObsDiscrete	Individual_Q	1.0	0.05	2500000	True	8	True	IndivQLearningSlugsTerminateOnCollision/188_18_8_none	none			0.05
IndivQLearningSlugsTerminateOnCollision/189_18_9	slugs_centralized	shields/general_shield	True	-10		True	GridWorld	SUNY	FullObsDiscrete	Individual_Q	1.0	0.05	2500000	True	9	True	IndivQLearningSlugsTerminateOnCollision/189_18_9_slugs_centralized	slugs_centralized	shields/general_shield		0.05
IndivQLearningSlugsTerminateOnCollision/189_18_9	slugs_centralized	shields/general_shield	True	-10		True	GridWorld	SUNY	FullObsDiscrete	Individual_Q	1.0	0.05	2500000	True	9	True	IndivQLearningSlugsTerminateOnCollision/189_18_9_slugs_decentralized	slugs_decentralized	shields/general_shield	False	0.05
IndivQLearningSlugsTerminateOnCollision/189_18_9	slugs_centralized	shields/general_shield	True	-10		True	GridWorld	SUNY	FullObsDiscrete	Individual_Q	1.0	0.05	2500000	True	9	True	IndivQLearningSlugsTerminateOnCollision/189_18_9_none	none			0.05
IndivQLearningSlugsTerminateOnCollision/190_19_0	slugs_decentralized	shields/general_shield	True	-10	False	True	GridWorld	SUNY	FullObsDiscrete	Individual_Q	1.0	0.05	2500000	True	0	True	IndivQLearningSlugsTerminateOnCollision/190_19_0_slugs_centralized	slugs_centralized	shields/general_shield		0.05
IndivQLearningSlugsTerminateOnCollision/190_19_0	slugs_decentralized	shields/general_shield	True	-10	False	True	GridWorld	SUNY	FullObsDiscrete	Individual_Q	1.0	0.05	2500000	True	0	True	IndivQLearningSlugsTerminateOnCollision/190_19_0_slugs_decentralized	slugs_decentralized	shields/general_shield	False	0.05
IndivQLearningSlugsTerminateOnCollision/190_19_0	slugs_decentralized	shields/general_shield	True	-10	False	True	GridWorld	SUNY	FullObsDiscrete	Individual_Q	1.0	0.05	2500000	True	0	True	IndivQLearningSlugsTerminateOnCollision/190_19_0_none	none			0.05
IndivQLearningSlugsTerminateOnCollision/191_19_1	slugs_decentralized	shields/general_shield	True	-10	False	True	GridWorld	SUNY	FullObsDiscrete	Individual_Q	1.0	0.05	2500000	True	1	True	IndivQLearningSlugsTerminateOnCollision/191_19_1_slugs_centralized	slugs_centralized	shields/general_shield		0.05
IndivQLearningSlugsTerminateOnCollision/191_19_1	slugs_decentralized	shields/general_shield	True	-10	False	True	GridWorld	SUNY	FullObsDiscrete	Individual_Q	1.0	0.05	2500000	True	1	True	IndivQLearningSlugsTerminateOnCollision/191_19_1_slugs_decentralized	slugs_decentralized	shields/general_shield	False	0.05
IndivQLearningSlugsTerminateOnCollision/191_19_1	slugs_decentralized	shields/general_shield	True	-10	False	True	GridWorld	SUNY	FullObsDiscrete	Individual_Q	1.0	0.05	2500000	True	1	True	IndivQLearningSlugsTerminateOnCollision/191_19_1_none	none			0.05
IndivQLearningSlugsTerminateOnCollision/192_19_2	slugs_decentralized	shields/general_shield	True	-10	False	True	GridWorld	SUNY	FullObsDiscrete	Individual_Q	1.0	0.05	2500000	True	2	True	IndivQLearningSlugsTerminateOnCollision/192_19_2_slugs_centralized	slugs_centralized	shields/general_shield		0.05
IndivQLearningSlugsTerminateOnCollision/192_19_2	slugs_decentralized	shields/general_shield	True	-10	False	True	GridWorld	SUNY	FullObsDiscrete	Individual_Q	1.0	0.05	2500000	True	2	True	IndivQLearningSlugsTerminateOnCollision/192_19_2_slugs_decentralized	slugs_decentralized	shields/general_shield	False	0.05
IndivQLearningSlugsTerminateOnCollision/192_19_2	slugs_decentralized	shields/general_shield	True	-10	False	True	GridWorld	SUNY	FullObsDiscrete	Individual_Q	1.0	0.05	2500000	True	2	True	IndivQLearningSlugsTerminateOnCollision/192_19_2_none	none			0.05
IndivQLearningSlugsTerminateOnCollision/193_19_3	slugs_decentralized	shields/general_shield	True	-10	False	True	GridWorld	SUNY	FullObsDiscrete	Individual_Q	1.0	0.05	2500000	True	3	True	IndivQLearningSlugsTerminateOnCollision/193_19_3_slugs_centralized	slugs_centralized	shields/general_shield		0.05
IndivQLearningSlugsTerminateOnCollision/193_19_3	slugs_decentralized	shields/general_shield	True	-10	False	True	GridWorld	SUNY	FullObsDiscrete	Individual_Q	1.0	0.05	2500000	True	3	True	IndivQLearningSlugsTerminateOnCollision/193_19_3_slugs_decentralized	slugs_decentralized	shields/general_shield	False	0.05
IndivQLearningSlugsTerminateOnCollision/193_19_3	slugs_decentralized	shields/general_shield	True	-10	False	True	GridWorld	SUNY	FullObsDiscrete	Individual_Q	1.0	0.05	2500000	True	3	True	IndivQLearningSlugsTerminateOnCollision/193_19_3_none	none			0.05
IndivQLearningSlugsTerminateOnCollision/194_19_4	slugs_decentralized	shields/general_shield	True	-10	False	True	GridWorld	SUNY	FullObsDiscrete	Individual_Q	1.0	0.05	2500000	True	4	True	IndivQLearningSlugsTerminateOnCollision/194_19_4_slugs_centralized	slugs_centralized	shields/general_shield		0.05
IndivQLearningSlugsTerminateOnCollision/194_19_4	slugs_decentralized	shields/general_shield	True	-10	False	True	GridWorld	SUNY	FullObsDiscrete	Individual_Q	1.0	0.05	2500000	True	4	True	IndivQLearningSlugsTerminateOnCollision/194_19_4_slugs_decentralized	slugs_decentralized	shields/general_shield	False	0.05
IndivQLearningSlugsTerminateOnCollision/194_19_4	slugs_decentralized	shields/general_shield	True	-10	False	True	GridWorld	SUNY	FullObsDiscrete	Individual_Q	1.0	0.05	2500000	True	4	True	IndivQLearningSlugsTerminateOnCollision/194_19_4_none	none			0.05
IndivQLearningSlugsTerminateOnCollision/195_19_5	slugs_decentralized	shields/general_shield	True	-10	False	True	GridWorld	SUNY	FullObsDiscrete	Individual_Q	1.0	0.05	2500000	True	5	True	IndivQLearningSlugsTerminateOnCollision/195_19_5_slugs_centralized	slugs_centralized	shields/general_shield		0.05
IndivQLearningSlugsTerminateOnCollision/195_19_5	slugs_decentralized	shields/general_shield	True	-10	False	True	GridWorld	SUNY	FullObsDiscrete	Individual_Q	1.0	0.05	2500000	True	5	True	IndivQLearningSlugsTerminateOnCollision/195_19_5_slugs_decentralized	slugs_decentralized	shields/general_shield	False	0.05
IndivQLearningSlugsTerminateOnCollision/195_19_5	slugs_decentralized	shields/general_shield	True	-10	False	True	GridWorld	SUNY	FullObsDiscrete	Individual_Q	1.0	0.05	2500000	True	5	True	IndivQLearningSlugsTerminateOnCollision/195_19_5_none	none			0.05
IndivQLearningSlugsTerminateOnCollision/196_19_6	slugs_decentralized	shields/general_shield	True	-10	False	True	GridWorld	SUNY	FullObsDiscrete	Individual_Q	1.0	0.05	2500000	True	6	True	IndivQLearningSlugsTerminateOnCollision/196_19_6_slugs_centralized	slugs_centralized	shields/general_shield		0.05
IndivQLearningSlugsTerminateOnCollision/196_19_6	slugs_decentralized	shields/general_shield	True	-10	False	True	GridWorld	SUNY	FullObsDiscrete	Individual_Q	1.0	0.05	2500000	True	6	True	IndivQLearningSlugsTerminateOnCollision/196_19_6_slugs_decentralized	slugs_decentralized	shields/general_shield	False	0.05
IndivQLearningSlugsTerminateOnCollision/196_19_6	slugs_decentralized	shields/general_shield	True	-10	False	True	GridWorld	SUNY	FullObsDiscrete	Individual_Q	1.0	0.05	2500000	True	6	True	IndivQLearningSlugsTerminateOnCollision/196_19_6_none	none			0.05
IndivQLearningSlugsTerminateOnCollision/197_19_7	slugs_decentralized	shields/general_shield	True	-10	False	True	GridWorld	SUNY	FullObsDiscrete	Individual_Q	1.0	0.05	2500000	True	7	True	IndivQLearningSlugsTerminateOnCollision/197_19_7_slugs_centralized	slugs_centralized	shields/general_shield		0.05
IndivQLearningSlugsTerminateOnCollision/197_19_7	slugs_decentralized	shields/general_shield	True	-10	False	True	GridWorld	SUNY	FullObsDiscrete	Individual_Q	1.0	0.05	2500000	True	7	True	IndivQLearningSlugsTerminateOnCollision/197_19_7_slugs_decentralized	slugs_decentralized	shields/general_shield	False	0.05
IndivQLearningSlugsTerminateOnCollision/197_19_7	slugs_decentralized	shields/general_shield	True	-10	False	True	GridWorld	SUNY	FullObsDiscrete	Individual_Q	1.0	0.05	2500000	True	7	True	IndivQLearningSlugsTerminateOnCollision/197_19_7_none	none			0.05
IndivQLearningSlugsTerminateOnCollision/198_19_8	slugs_decentralized	shields/general_shield	True	-10	False	True	GridWorld	SUNY	FullObsDiscrete	Individual_Q	1.0	0.05	2500000	True	8	True	IndivQLearningSlugsTerminateOnCollision/198_19_8_slugs_centralized	slugs_centralized	shields/general_shield		0.05
IndivQLearningSlugsTerminateOnCollision/198_19_8	slugs_decentralized	shields/general_shield	True	-10	False	True	GridWorld	SUNY	FullObsDiscrete	Individual_Q	1.0	0.05	2500000	True	8	True	IndivQLearningSlugsTerminateOnCollision/198_19_8_slugs_decentralized	slugs_decentralized	shields/general_shield	False	0.05
IndivQLearningSlugsTerminateOnCollision/198_19_8	slugs_decentralized	shields/general_shield	True	-10	False	True	GridWorld	SUNY	FullObsDiscrete	Individual_Q	1.0	0.05	2500000	True	8	True	IndivQLearningSlugsTerminateOnCollision/198_19_8_none	none			0.05
IndivQLearningSlugsTerminateOnCollision/199_19_9	slugs_decentralized	shields/general_shield	True	-10	False	True	GridWorld	SUNY	FullObsDiscrete	Individual_Q	1.0	0.05	2500000	True	9	True	IndivQLearningSlugsTerminateOnCollision/199_19_9_slugs_centralized	slugs_centralized	shields/general_shield		0.05
IndivQLearningSlugsTerminateOnCollision/199_19_9	slugs_decentralized	shields/general_shield	True	-10	False	True	GridWorld	SUNY	FullObsDiscrete	Individual_Q	1.0	0.05	2500000	True	9	True	IndivQLearningSlugsTerminateOnCollision/199_19_9_slugs_decentralized	slugs_decentralized	shields/general_shield	False	0.05
IndivQLearningSlugsTerminateOnCollision/199_19_9	slugs_decentralized	shields/general_shield	True	-10	False	True	GridWorld	SUNY	FullObsDiscrete	Individual_Q	1.0	0.05	2500000	True	9	True	IndivQLearningSlugsTerminateOnCollision/199_19_9_none	none			0.05
IndivQLearningSlugsTerminateOnCollision/200_20_0	none		True	-10		True	GridWorld	SUNY	FullObsDiscrete	Individual_Q	1.0	0.05	2500000	True	0	True	IndivQLearningSlugsTerminateOnCollision/200_20_0_slugs_centralized	slugs_centralized	shields/general_shield		0.05
IndivQLearningSlugsTerminateOnCollision/200_20_0	none		True	-10		True	GridWorld	SUNY	FullObsDiscrete	Individual_Q	1.0	0.05	2500000	True	0	True	IndivQLearningSlugsTerminateOnCollision/200_20_0_slugs_decentralized	slugs_decentralized	shields/general_shield	False	0.05
IndivQLearningSlugsTerminateOnCollision/200_20_0	none		True	-10		True	GridWorld	SUNY	FullObsDiscrete	Individual_Q	1.0	0.05	2500000	True	0	True	IndivQLearningSlugsTerminateOnCollision/200_20_0_none	none			0.05
IndivQLearningSlugsTerminateOnCollision/201_20_1	none		True	-10		True	GridWorld	SUNY	FullObsDiscrete	Individual_Q	1.0	0.05	2500000	True	1	True	IndivQLearningSlugsTerminateOnCollision/201_20_1_slugs_centralized	slugs_centralized	shields/general_shield		0.05
IndivQLearningSlugsTerminateOnCollision/201_20_1	none		True	-10		True	GridWorld	SUNY	FullObsDiscrete	Individual_Q	1.0	0.05	2500000	True	1	True	IndivQLearningSlugsTerminateOnCollision/201_20_1_slugs_decentralized	slugs_decentralized	shields/general_shield	False	0.05
IndivQLearningSlugsTerminateOnCollision/201_20_1	none		True	-10		True	GridWorld	SUNY	FullObsDiscrete	Individual_Q	1.0	0.05	2500000	True	1	True	IndivQLearningSlugsTerminateOnCollision/201_20_1_none	none			0.05
IndivQLearningSlugsTerminateOnCollision/202_20_2	none		True	-10		True	GridWorld	SUNY	FullObsDiscrete	Individual_Q	1.0	0.05	2500000	True	2	True	IndivQLearningSlugsTerminateOnCollision/202_20_2_slugs_centralized	slugs_centralized	shields/general_shield		0.05
IndivQLearningSlugsTerminateOnCollision/202_20_2	none		True	-10		True	GridWorld	SUNY	FullObsDiscrete	Individual_Q	1.0	0.05	2500000	True	2	True	IndivQLearningSlugsTerminateOnCollision/202_20_2_slugs_decentralized	slugs_decentralized	shields/general_shield	False	0.05
IndivQLearningSlugsTerminateOnCollision/202_20_2	none		True	-10		True	GridWorld	SUNY	FullObsDiscrete	Individual_Q	1.0	0.05	2500000	True	2	True	IndivQLearningSlugsTerminateOnCollision/202_20_2_none	none			0.05
IndivQLearningSlugsTerminateOnCollision/203_20_3	none		True	-10		True	GridWorld	SUNY	FullObsDiscrete	Individual_Q	1.0	0.05	2500000	True	3	True	IndivQLearningSlugsTerminateOnCollision/203_20_3_slugs_centralized	slugs_centralized	shields/general_shield		0.05
IndivQLearningSlugsTerminateOnCollision/203_20_3	none		True	-10		True	GridWorld	SUNY	FullObsDiscrete	Individual_Q	1.0	0.05	2500000	True	3	True	IndivQLearningSlugsTerminateOnCollision/203_20_3_slugs_decentralized	slugs_decentralized	shields/general_shield	False	0.05
IndivQLearningSlugsTerminateOnCollision/203_20_3	none		True	-10		True	GridWorld	SUNY	FullObsDiscrete	Individual_Q	1.0	0.05	2500000	True	3	True	IndivQLearningSlugsTerminateOnCollision/203_20_3_none	none			0.05
IndivQLearningSlugsTerminateOnCollision/204_20_4	none		True	-10		True	GridWorld	SUNY	FullObsDiscrete	Individual_Q	1.0	0.05	2500000	True	4	True	IndivQLearningSlugsTerminateOnCollision/204_20_4_slugs_centralized	slugs_centralized	shields/general_shield		0.05
IndivQLearningSlugsTerminateOnCollision/204_20_4	none		True	-10		True	GridWorld	SUNY	FullObsDiscrete	Individual_Q	1.0	0.05	2500000	True	4	True	IndivQLearningSlugsTerminateOnCollision/204_20_4_slugs_decentralized	slugs_decentralized	shields/general_shield	False	0.05
IndivQLearningSlugsTerminateOnCollision/204_20_4	none		True	-10		True	GridWorld	SUNY	FullObsDiscrete	Individual_Q	1.0	0.05	2500000	True	4	True	IndivQLearningSlugsTerminateOnCollision/204_20_4_none	none			0.05
IndivQLearningSlugsTerminateOnCollision/205_20_5	none		True	-10		True	GridWorld	SUNY	FullObsDiscrete	Individual_Q	1.0	0.05	2500000	True	5	True	IndivQLearningSlugsTerminateOnCollision/205_20_5_slugs_centralized	slugs_centralized	shields/general_shield		0.05
IndivQLearningSlugsTerminateOnCollision/205_20_5	none		True	-10		True	GridWorld	SUNY	FullObsDiscrete	Individual_Q	1.0	0.05	2500000	True	5	True	IndivQLearningSlugsTerminateOnCollision/205_20_5_slugs_decentralized	slugs_decentralized	shields/general_shield	False	0.05
IndivQLearningSlugsTerminateOnCollision/205_20_5	none		True	-10		True	GridWorld	SUNY	FullObsDiscrete	Individual_Q	1.0	0.05	2500000	True	5	True	IndivQLearningSlugsTerminateOnCollision/205_20_5_none	none			0.05
IndivQLearningSlugsTerminateOnCollision/206_20_6	none		True	-10		True	GridWorld	SUNY	FullObsDiscrete	Individual_Q	1.0	0.05	2500000	True	6	True	IndivQLearningSlugsTerminateOnCollision/206_20_6_slugs_centralized	slugs_centralized	shields/general_shield		0.05
IndivQLearningSlugsTerminateOnCollision/206_20_6	none		True	-10		True	GridWorld	SUNY	FullObsDiscrete	Individual_Q	1.0	0.05	2500000	True	6	True	IndivQLearningSlugsTerminateOnCollision/206_20_6_slugs_decentralized	slugs_decentralized	shields/general_shield	False	0.05
IndivQLearningSlugsTerminateOnCollision/206_20_6	none		True	-10		True	GridWorld	SUNY	FullObsDiscrete	Individual_Q	1.0	0.05	2500000	True	6	True	IndivQLearningSlugsTerminateOnCollision/206_20_6_none	none			0.05
IndivQLearningSlugsTerminateOnCollision/207_20_7	none		True	-10		True	GridWorld	SUNY	FullObsDiscrete	Individual_Q	1.0	0.05	2500000	True	7	True	IndivQLearningSlugsTerminateOnCollision/207_20_7_slugs_centralized	slugs_centralized	shields/general_shield		0.05
IndivQLearningSlugsTerminateOnCollision/207_20_7	none		True	-10		True	GridWorld	SUNY	FullObsDiscrete	Individual_Q	1.0	0.05	2500000	True	7	True	IndivQLearningSlugsTerminateOnCollision/207_20_7_slugs_decentralized	slugs_decentralized	shields/general_shield	False	0.05
IndivQLearningSlugsTerminateOnCollision/207_20_7	none		True	-10		True	GridWorld	SUNY	FullObsDiscrete	Individual_Q	1.0	0.05	2500000	True	7	True	IndivQLearningSlugsTerminateOnCollision/207_20_7_none	none			0.05
IndivQLearningSlugsTerminateOnCollision/208_20_8	none		True	-10		True	GridWorld	SUNY	FullObsDiscrete	Individual_Q	1.0	0.05	2500000	True	8	True	IndivQLearningSlugsTerminateOnCollision/208_20_8_slugs_centralized	slugs_centralized	shields/general_shield		0.05
IndivQLearningSlugsTerminateOnCollision/208_20_8	none		True	-10		True	GridWorld	SUNY	FullObsDiscrete	Individual_Q	1.0	0.05	2500000	True	8	True	IndivQLearningSlugsTerminateOnCollision/208_20_8_slugs_decentralized	slugs_decentralized	shields/general_shield	False	0.05
IndivQLearningSlugsTerminateOnCollision/208_20_8	none		True	-10		True	GridWorld	SUNY	FullObsDiscrete	Individual_Q	1.0	0.05	2500000	True	8	True	IndivQLearningSlugsTerminateOnCollision/208_20_8_none	none			0.05
IndivQLearningSlugsTerminateOnCollision/209_20_9	none		True	-10		True	GridWorld	SUNY	FullObsDiscrete	Individual_Q	1.0	0.05	2500000	True	9	True	IndivQLearningSlugsTerminateOnCollision/209_20_9_slugs_centralized	slugs_centralized	shields/general_shield		0.05
IndivQLearningSlugsTerminateOnCollision/209_20_9	none		True	-10		True	GridWorld	SUNY	FullObsDiscrete	Individual_Q	1.0	0.05	2500000	True	9	True	IndivQLearningSlugsTerminateOnCollision/209_20_9_slugs_decentralized	slugs_decentralized	shields/general_shield	False	0.05
IndivQLearningSlugsTerminateOnCollision/209_20_9	none		True	-10		True	GridWorld	SUNY	FullObsDiscrete	Individual_Q	1.0	0.05	2500000	True	9	True	IndivQLearningSlugsTerminateOnCollision/209_20_9_none	none			0.05
IndivQLearningSlugsTerminateOnCollision/210_21_0	slugs_centralized	shields/general_shield	True	-10		False	GridWorld	SUNY	FullObsDiscrete	Individual_Q	1.0	0.05	2500000	True	0	True	IndivQLearningSlugsTerminateOnCollision/210_21_0_slugs_centralized	slugs_centralized	shields/general_shield		0.05
IndivQLearningSlugsTerminateOnCollision/210_21_0	slugs_centralized	shields/general_shield	True	-10		False	GridWorld	SUNY	FullObsDiscrete	Individual_Q	1.0	0.05	2500000	True	0	True	IndivQLearningSlugsTerminateOnCollision/210_21_0_slugs_decentralized	slugs_decentralized	shields/general_shield	False	0.05
IndivQLearningSlugsTerminateOnCollision/210_21_0	slugs_centralized	shields/general_shield	True	-10		False	GridWorld	SUNY	FullObsDiscrete	Individual_Q	1.0	0.05	2500000	True	0	True	IndivQLearningSlugsTerminateOnCollision/210_21_0_none	none			0.05
IndivQLearningSlugsTerminateOnCollision/211_21_1	slugs_centralized	shields/general_shield	True	-10		False	GridWorld	SUNY	FullObsDiscrete	Individual_Q	1.0	0.05	2500000	True	1	True	IndivQLearningSlugsTerminateOnCollision/211_21_1_slugs_centralized	slugs_centralized	shields/general_shield		0.05
IndivQLearningSlugsTerminateOnCollision/211_21_1	slugs_centralized	shields/general_shield	True	-10		False	GridWorld	SUNY	FullObsDiscrete	Individual_Q	1.0	0.05	2500000	True	1	True	IndivQLearningSlugsTerminateOnCollision/211_21_1_slugs_decentralized	slugs_decentralized	shields/general_shield	False	0.05
IndivQLearningSlugsTerminateOnCollision/211_21_1	slugs_centralized	shields/general_shield	True	-10		False	GridWorld	SUNY	FullObsDiscrete	Individual_Q	1.0	0.05	2500000	True	1	True	IndivQLearningSlugsTerminateOnCollision/211_21_1_none	none			0.05
IndivQLearningSlugsTerminateOnCollision/212_21_2	slugs_centralized	shields/general_shield	True	-10		False	GridWorld	SUNY	FullObsDiscrete	Individual_Q	1.0	0.05	2500000	True	2	True	IndivQLearningSlugsTerminateOnCollision/212_21_2_slugs_centralized	slugs_centralized	shields/general_shield		0.05
IndivQLearningSlugsTerminateOnCollision/212_21_2	slugs_centralized	shields/general_shield	True	-10		False	GridWorld	SUNY	FullObsDiscrete	Individual_Q	1.0	0.05	2500000	True	2	True	IndivQLearningSlugsTerminateOnCollision/212_21_2_slugs_decentralized	slugs_decentralized	shields/general_shield	False	0.05
IndivQLearningSlugsTerminateOnCollision/212_21_2	slugs_centralized	shields/general_shield	True	-10		False	GridWorld	SUNY	FullObsDiscrete	Individual_Q	1.0	0.05	2500000	True	2	True	IndivQLearningSlugsTerminateOnCollision/212_21_2_none	none			0.05
IndivQLearningSlugsTerminateOnCollision/213_21_3	slugs_centralized	shields/general_shield	True	-10		False	GridWorld	SUNY	FullObsDiscrete	Individual_Q	1.0	0.05	2500000	True	3	True	IndivQLearningSlugsTerminateOnCollision/213_21_3_slugs_centralized	slugs_centralized	shields/general_shield		0.05
IndivQLearningSlugsTerminateOnCollision/213_21_3	slugs_centralized	shields/general_shield	True	-10		False	GridWorld	SUNY	FullObsDiscrete	Individual_Q	1.0	0.05	2500000	True	3	True	IndivQLearningSlugsTerminateOnCollision/213_21_3_slugs_decentralized	slugs_decentralized	shields/general_shield	False	0.05
IndivQLearningSlugsTerminateOnCollision/213_21_3	slugs_centralized	shields/general_shield	True	-10		False	GridWorld	SUNY	FullObsDiscrete	Individual_Q	1.0	0.05	2500000	True	3	True	IndivQLearningSlugsTerminateOnCollision/213_21_3_none	none			0.05
IndivQLearningSlugsTerminateOnCollision/214_21_4	slugs_centralized	shields/general_shield	True	-10		False	GridWorld	SUNY	FullObsDiscrete	Individual_Q	1.0	0.05	2500000	True	4	True	IndivQLearningSlugsTerminateOnCollision/214_21_4_slugs_centralized	slugs_centralized	shields/general_shield		0.05
IndivQLearningSlugsTerminateOnCollision/214_21_4	slugs_centralized	shields/general_shield	True	-10		False	GridWorld	SUNY	FullObsDiscrete	Individual_Q	1.0	0.05	2500000	True	4	True	IndivQLearningSlugsTerminateOnCollision/214_21_4_slugs_decentralized	slugs_decentralized	shields/general_shield	False	0.05
IndivQLearningSlugsTerminateOnCollision/214_21_4	slugs_centralized	shields/general_shield	True	-10		False	GridWorld	SUNY	FullObsDiscrete	Individual_Q	1.0	0.05	2500000	True	4	True	IndivQLearningSlugsTerminateOnCollision/214_21_4_none	none			0.05
IndivQLearningSlugsTerminateOnCollision/215_21_5	slugs_centralized	shields/general_shield	True	-10		False	GridWorld	SUNY	FullObsDiscrete	Individual_Q	1.0	0.05	2500000	True	5	True	IndivQLearningSlugsTerminateOnCollision/215_21_5_slugs_centralized	slugs_centralized	shields/general_shield		0.05
IndivQLearningSlugsTerminateOnCollision/215_21_5	slugs_centralized	shields/general_shield	True	-10		False	GridWorld	SUNY	FullObsDiscrete	Individual_Q	1.0	0.05	2500000	True	5	True	IndivQLearningSlugsTerminateOnCollision/215_21_5_slugs_decentralized	slugs_decentralized	shields/general_shield	False	0.05
IndivQLearningSlugsTerminateOnCollision/215_21_5	slugs_centralized	shields/general_shield	True	-10		False	GridWorld	SUNY	FullObsDiscrete	Individual_Q	1.0	0.05	2500000	True	5	True	IndivQLearningSlugsTerminateOnCollision/215_21_5_none	none			0.05
IndivQLearningSlugsTerminateOnCollision/216_21_6	slugs_centralized	shields/general_shield	True	-10		False	GridWorld	SUNY	FullObsDiscrete	Individual_Q	1.0	0.05	2500000	True	6	True	IndivQLearningSlugsTerminateOnCollision/216_21_6_slugs_centralized	slugs_centralized	shields/general_shield		0.05
IndivQLearningSlugsTerminateOnCollision/216_21_6	slugs_centralized	shields/general_shield	True	-10		False	GridWorld	SUNY	FullObsDiscrete	Individual_Q	1.0	0.05	2500000	True	6	True	IndivQLearningSlugsTerminateOnCollision/216_21_6_slugs_decentralized	slugs_decentralized	shields/general_shield	False	0.05
IndivQLearningSlugsTerminateOnCollision/216_21_6	slugs_centralized	shields/general_shield	True	-10		False	GridWorld	SUNY	FullObsDiscrete	Individual_Q	1.0	0.05	2500000	True	6	True	IndivQLearningSlugsTerminateOnCollision/216_21_6_none	none			0.05
IndivQLearningSlugsTerminateOnCollision/217_21_7	slugs_centralized	shields/general_shield	True	-10		False	GridWorld	SUNY	FullObsDiscrete	Individual_Q	1.0	0.05	2500000	True	7	True	IndivQLearningSlugsTerminateOnCollision/217_21_7_slugs_centralized	slugs_centralized	shields/general_shield		0.05
IndivQLearningSlugsTerminateOnCollision/217_21_7	slugs_centralized	shields/general_shield	True	-10		False	GridWorld	SUNY	FullObsDiscrete	Individual_Q	1.0	0.05	2500000	True	7	True	IndivQLearningSlugsTerminateOnCollision/217_21_7_slugs_decentralized	slugs_decentralized	shields/general_shield	False	0.05
IndivQLearningSlugsTerminateOnCollision/217_21_7	slugs_centralized	shields/general_shield	True	-10		False	GridWorld	SUNY	FullObsDiscrete	Individual_Q	1.0	0.05	2500000	True	7	True	IndivQLearningSlugsTerminateOnCollision/217_21_7_none	none			0.05
IndivQLearningSlugsTerminateOnCollision/218_21_8	slugs_centralized	shields/general_shield	True	-10		False	GridWorld	SUNY	FullObsDiscrete	Individual_Q	1.0	0.05	2500000	True	8	True	IndivQLearningSlugsTerminateOnCollision/218_21_8_slugs_centralized	slugs_centralized	shields/general_shield		0.05
IndivQLearningSlugsTerminateOnCollision/218_21_8	slugs_centralized	shields/general_shield	True	-10		False	GridWorld	SUNY	FullObsDiscrete	Individual_Q	1.0	0.05	2500000	True	8	True	IndivQLearningSlugsTerminateOnCollision/218_21_8_slugs_decentralized	slugs_decentralized	shields/general_shield	False	0.05
IndivQLearningSlugsTerminateOnCollision/218_21_8	slugs_centralized	shields/general_shield	True	-10		False	GridWorld	SUNY	FullObsDiscrete	Individual_Q	1.0	0.05	2500000	True	8	True	IndivQLearningSlugsTerminateOnCollision/218_21_8_none	none			0.05
IndivQLearningSlugsTerminateOnCollision/219_21_9	slugs_centralized	shields/general_shield	True	-10		False	GridWorld	SUNY	FullObsDiscrete	Individual_Q	1.0	0.05	2500000	True	9	True	IndivQLearningSlugsTerminateOnCollision/219_21_9_slugs_centralized	slugs_centralized	shields/general_shield		0.05
IndivQLearningSlugsTerminateOnCollision/219_21_9	slugs_centralized	shields/general_shield	True	-10		False	GridWorld	SUNY	FullObsDiscrete	Individual_Q	1.0	0.05	2500000	True	9	True	IndivQLearningSlugsTerminateOnCollision/219_21_9_slugs_decentralized	slugs_decentralized	shields/general_shield	False	0.05
IndivQLearningSlugsTerminateOnCollision/219_21_9	slugs_centralized	shields/general_shield	True	-10		False	GridWorld	SUNY	FullObsDiscrete	Individual_Q	1.0	0.05	2500000	True	9	True	IndivQLearningSlugsTerminateOnCollision/219_21_9_none	none			0.05
IndivQLearningSlugsTerminateOnCollision/220_22_0	slugs_decentralized	shields/general_shield	True	-10	False	False	GridWorld	SUNY	FullObsDiscrete	Individual_Q	1.0	0.05	2500000	True	0	True	IndivQLearningSlugsTerminateOnCollision/220_22_0_slugs_centralized	slugs_centralized	shields/general_shield		0.05
IndivQLearningSlugsTerminateOnCollision/220_22_0	slugs_decentralized	shields/general_shield	True	-10	False	False	GridWorld	SUNY	FullObsDiscrete	Individual_Q	1.0	0.05	2500000	True	0	True	IndivQLearningSlugsTerminateOnCollision/220_22_0_slugs_decentralized	slugs_decentralized	shields/general_shield	False	0.05
IndivQLearningSlugsTerminateOnCollision/220_22_0	slugs_decentralized	shields/general_shield	True	-10	False	False	GridWorld	SUNY	FullObsDiscrete	Individual_Q	1.0	0.05	2500000	True	0	True	IndivQLearningSlugsTerminateOnCollision/220_22_0_none	none			0.05
IndivQLearningSlugsTerminateOnCollision/221_22_1	slugs_decentralized	shields/general_shield	True	-10	False	False	GridWorld	SUNY	FullObsDiscrete	Individual_Q	1.0	0.05	2500000	True	1	True	IndivQLearningSlugsTerminateOnCollision/221_22_1_slugs_centralized	slugs_centralized	shields/general_shield		0.05
IndivQLearningSlugsTerminateOnCollision/221_22_1	slugs_decentralized	shields/general_shield	True	-10	False	False	GridWorld	SUNY	FullObsDiscrete	Individual_Q	1.0	0.05	2500000	True	1	True	IndivQLearningSlugsTerminateOnCollision/221_22_1_slugs_decentralized	slugs_decentralized	shields/general_shield	False	0.05
IndivQLearningSlugsTerminateOnCollision/221_22_1	slugs_decentralized	shields/general_shield	True	-10	False	False	GridWorld	SUNY	FullObsDiscrete	Individual_Q	1.0	0.05	2500000	True	1	True	IndivQLearningSlugsTerminateOnCollision/221_22_1_none	none			0.05
IndivQLearningSlugsTerminateOnCollision/222_22_2	slugs_decentralized	shields/general_shield	True	-10	False	False	GridWorld	SUNY	FullObsDiscrete	Individual_Q	1.0	0.05	2500000	True	2	True	IndivQLearningSlugsTerminateOnCollision/222_22_2_slugs_centralized	slugs_centralized	shields/general_shield		0.05
IndivQLearningSlugsTerminateOnCollision/222_22_2	slugs_decentralized	shields/general_shield	True	-10	False	False	GridWorld	SUNY	FullObsDiscrete	Individual_Q	1.0	0.05	2500000	True	2	True	IndivQLearningSlugsTerminateOnCollision/222_22_2_slugs_decentralized	slugs_decentralized	shields/general_shield	False	0.05
IndivQLearningSlugsTerminateOnCollision/222_22_2	slugs_decentralized	shields/general_shield	True	-10	False	False	GridWorld	SUNY	FullObsDiscrete	Individual_Q	1.0	0.05	2500000	True	2	True	IndivQLearningSlugsTerminateOnCollision/222_22_2_none	none			0.05
IndivQLearningSlugsTerminateOnCollision/223_22_3	slugs_decentralized	shields/general_shield	True	-10	False	False	GridWorld	SUNY	FullObsDiscrete	Individual_Q	1.0	0.05	2500000	True	3	True	IndivQLearningSlugsTerminateOnCollision/223_22_3_slugs_centralized	slugs_centralized	shields/general_shield		0.05
IndivQLearningSlugsTerminateOnCollision/223_22_3	slugs_decentralized	shields/general_shield	True	-10	False	False	GridWorld	SUNY	FullObsDiscrete	Individual_Q	1.0	0.05	2500000	True	3	True	IndivQLearningSlugsTerminateOnCollision/223_22_3_slugs_decentralized	slugs_decentralized	shields/general_shield	False	0.05
IndivQLearningSlugsTerminateOnCollision/223_22_3	slugs_decentralized	shields/general_shield	True	-10	False	False	GridWorld	SUNY	FullObsDiscrete	Individual_Q	1.0	0.05	2500000	True	3	True	IndivQLearningSlugsTerminateOnCollision/223_22_3_none	none			0.05
IndivQLearningSlugsTerminateOnCollision/224_22_4	slugs_decentralized	shields/general_shield	True	-10	False	False	GridWorld	SUNY	FullObsDiscrete	Individual_Q	1.0	0.05	2500000	True	4	True	IndivQLearningSlugsTerminateOnCollision/224_22_4_slugs_centralized	slugs_centralized	shields/general_shield		0.05
IndivQLearningSlugsTerminateOnCollision/224_22_4	slugs_decentralized	shields/general_shield	True	-10	False	False	GridWorld	SUNY	FullObsDiscrete	Individual_Q	1.0	0.05	2500000	True	4	True	IndivQLearningSlugsTerminateOnCollision/224_22_4_slugs_decentralized	slugs_decentralized	shields/general_shield	False	0.05
IndivQLearningSlugsTerminateOnCollision/224_22_4	slugs_decentralized	shields/general_shield	True	-10	False	False	GridWorld	SUNY	FullObsDiscrete	Individual_Q	1.0	0.05	2500000	True	4	True	IndivQLearningSlugsTerminateOnCollision/224_22_4_none	none			0.05
IndivQLearningSlugsTerminateOnCollision/225_22_5	slugs_decentralized	shields/general_shield	True	-10	False	False	GridWorld	SUNY	FullObsDiscrete	Individual_Q	1.0	0.05	2500000	True	5	True	IndivQLearningSlugsTerminateOnCollision/225_22_5_slugs_centralized	slugs_centralized	shields/general_shield		0.05
IndivQLearningSlugsTerminateOnCollision/225_22_5	slugs_decentralized	shields/general_shield	True	-10	False	False	GridWorld	SUNY	FullObsDiscrete	Individual_Q	1.0	0.05	2500000	True	5	True	IndivQLearningSlugsTerminateOnCollision/225_22_5_slugs_decentralized	slugs_decentralized	shields/general_shield	False	0.05
IndivQLearningSlugsTerminateOnCollision/225_22_5	slugs_decentralized	shields/general_shield	True	-10	False	False	GridWorld	SUNY	FullObsDiscrete	Individual_Q	1.0	0.05	2500000	True	5	True	IndivQLearningSlugsTerminateOnCollision/225_22_5_none	none			0.05
IndivQLearningSlugsTerminateOnCollision/226_22_6	slugs_decentralized	shields/general_shield	True	-10	False	False	GridWorld	SUNY	FullObsDiscrete	Individual_Q	1.0	0.05	2500000	True	6	True	IndivQLearningSlugsTerminateOnCollision/226_22_6_slugs_centralized	slugs_centralized	shields/general_shield		0.05
IndivQLearningSlugsTerminateOnCollision/226_22_6	slugs_decentralized	shields/general_shield	True	-10	False	False	GridWorld	SUNY	FullObsDiscrete	Individual_Q	1.0	0.05	2500000	True	6	True	IndivQLearningSlugsTerminateOnCollision/226_22_6_slugs_decentralized	slugs_decentralized	shields/general_shield	False	0.05
IndivQLearningSlugsTerminateOnCollision/226_22_6	slugs_decentralized	shields/general_shield	True	-10	False	False	GridWorld	SUNY	FullObsDiscrete	Individual_Q	1.0	0.05	2500000	True	6	True	IndivQLearningSlugsTerminateOnCollision/226_22_6_none	none			0.05
IndivQLearningSlugsTerminateOnCollision/227_22_7	slugs_decentralized	shields/general_shield	True	-10	False	False	GridWorld	SUNY	FullObsDiscrete	Individual_Q	1.0	0.05	2500000	True	7	True	IndivQLearningSlugsTerminateOnCollision/227_22_7_slugs_centralized	slugs_centralized	shields/general_shield		0.05
IndivQLearningSlugsTerminateOnCollision/227_22_7	slugs_decentralized	shields/general_shield	True	-10	False	False	GridWorld	SUNY	FullObsDiscrete	Individual_Q	1.0	0.05	2500000	True	7	True	IndivQLearningSlugsTerminateOnCollision/227_22_7_slugs_decentralized	slugs_decentralized	shields/general_shield	False	0.05
IndivQLearningSlugsTerminateOnCollision/227_22_7	slugs_decentralized	shields/general_shield	True	-10	False	False	GridWorld	SUNY	FullObsDiscrete	Individual_Q	1.0	0.05	2500000	True	7	True	IndivQLearningSlugsTerminateOnCollision/227_22_7_none	none			0.05
IndivQLearningSlugsTerminateOnCollision/228_22_8	slugs_decentralized	shields/general_shield	True	-10	False	False	GridWorld	SUNY	FullObsDiscrete	Individual_Q	1.0	0.05	2500000	True	8	True	IndivQLearningSlugsTerminateOnCollision/228_22_8_slugs_centralized	slugs_centralized	shields/general_shield		0.05
IndivQLearningSlugsTerminateOnCollision/228_22_8	slugs_decentralized	shields/general_shield	True	-10	False	False	GridWorld	SUNY	FullObsDiscrete	Individual_Q	1.0	0.05	2500000	True	8	True	IndivQLearningSlugsTerminateOnCollision/228_22_8_slugs_decentralized	slugs_decentralized	shields/general_shield	False	0.05
IndivQLearningSlugsTerminateOnCollision/228_22_8	slugs_decentralized	shields/general_shield	True	-10	False	False	GridWorld	SUNY	FullObsDiscrete	Individual_Q	1.0	0.05	2500000	True	8	True	IndivQLearningSlugsTerminateOnCollision/228_22_8_none	none			0.05
IndivQLearningSlugsTerminateOnCollision/229_22_9	slugs_decentralized	shields/general_shield	True	-10	False	False	GridWorld	SUNY	FullObsDiscrete	Individual_Q	1.0	0.05	2500000	True	9	True	IndivQLearningSlugsTerminateOnCollision/229_22_9_slugs_centralized	slugs_centralized	shields/general_shield		0.05
IndivQLearningSlugsTerminateOnCollision/229_22_9	slugs_decentralized	shields/general_shield	True	-10	False	False	GridWorld	SUNY	FullObsDiscrete	Individual_Q	1.0	0.05	2500000	True	9	True	IndivQLearningSlugsTerminateOnCollision/229_22_9_slugs_decentralized	slugs_decentralized	shields/general_shield	False	0.05
IndivQLearningSlugsTerminateOnCollision/229_22_9	slugs_decentralized	shields/general_shield	True	-10	False	False	GridWorld	SUNY	FullObsDiscrete	Individual_Q	1.0	0.05	2500000	True	9	True	IndivQLearningSlugsTerminateOnCollision/229_22_9_none	none			0.05
IndivQLearningSlugsTerminateOnCollision/230_23_0	none		True	-10		False	GridWorld	SUNY	FullObsDiscrete	Individual_Q	1.0	0.05	2500000	True	0	True	IndivQLearningSlugsTerminateOnCollision/230_23_0_slugs_centralized	slugs_centralized	shields/general_shield		0.05
IndivQLearningSlugsTerminateOnCollision/230_23_0	none		True	-10		False	GridWorld	SUNY	FullObsDiscrete	Individual_Q	1.0	0.05	2500000	True	0	True	IndivQLearningSlugsTerminateOnCollision/230_23_0_slugs_decentralized	slugs_decentralized	shields/general_shield	False	0.05
IndivQLearningSlugsTerminateOnCollision/230_23_0	none		True	-10		False	GridWorld	SUNY	FullObsDiscrete	Individual_Q	1.0	0.05	2500000	True	0	True	IndivQLearningSlugsTerminateOnCollision/230_23_0_none	none			0.05
IndivQLearningSlugsTerminateOnCollision/231_23_1	none		True	-10		False	GridWorld	SUNY	FullObsDiscrete	Individual_Q	1.0	0.05	2500000	True	1	True	IndivQLearningSlugsTerminateOnCollision/231_23_1_slugs_centralized	slugs_centralized	shields/general_shield		0.05
IndivQLearningSlugsTerminateOnCollision/231_23_1	none		True	-10		False	GridWorld	SUNY	FullObsDiscrete	Individual_Q	1.0	0.05	2500000	True	1	True	IndivQLearningSlugsTerminateOnCollision/231_23_1_slugs_decentralized	slugs_decentralized	shields/general_shield	False	0.05
IndivQLearningSlugsTerminateOnCollision/231_23_1	none		True	-10		False	GridWorld	SUNY	FullObsDiscrete	Individual_Q	1.0	0.05	2500000	True	1	True	IndivQLearningSlugsTerminateOnCollision/231_23_1_none	none			0.05
IndivQLearningSlugsTerminateOnCollision/232_23_2	none		True	-10		False	GridWorld	SUNY	FullObsDiscrete	Individual_Q	1.0	0.05	2500000	True	2	True	IndivQLearningSlugsTerminateOnCollision/232_23_2_slugs_centralized	slugs_centralized	shields/general_shield		0.05
IndivQLearningSlugsTerminateOnCollision/232_23_2	none		True	-10		False	GridWorld	SUNY	FullObsDiscrete	Individual_Q	1.0	0.05	2500000	True	2	True	IndivQLearningSlugsTerminateOnCollision/232_23_2_slugs_decentralized	slugs_decentralized	shields/general_shield	False	0.05
IndivQLearningSlugsTerminateOnCollision/232_23_2	none		True	-10		False	GridWorld	SUNY	FullObsDiscrete	Individual_Q	1.0	0.05	2500000	True	2	True	IndivQLearningSlugsTerminateOnCollision/232_23_2_none	none			0.05
IndivQLearningSlugsTerminateOnCollision/233_23_3	none		True	-10		False	GridWorld	SUNY	FullObsDiscrete	Individual_Q	1.0	0.05	2500000	True	3	True	IndivQLearningSlugsTerminateOnCollision/233_23_3_slugs_centralized	slugs_centralized	shields/general_shield		0.05
IndivQLearningSlugsTerminateOnCollision/233_23_3	none		True	-10		False	GridWorld	SUNY	FullObsDiscrete	Individual_Q	1.0	0.05	2500000	True	3	True	IndivQLearningSlugsTerminateOnCollision/233_23_3_slugs_decentralized	slugs_decentralized	shields/general_shield	False	0.05
IndivQLearningSlugsTerminateOnCollision/233_23_3	none		True	-10		False	GridWorld	SUNY	FullObsDiscrete	Individual_Q	1.0	0.05	2500000	True	3	True	IndivQLearningSlugsTerminateOnCollision/233_23_3_none	none			0.05
IndivQLearningSlugsTerminateOnCollision/234_23_4	none		True	-10		False	GridWorld	SUNY	FullObsDiscrete	Individual_Q	1.0	0.05	2500000	True	4	True	IndivQLearningSlugsTerminateOnCollision/234_23_4_slugs_centralized	slugs_centralized	shields/general_shield		0.05
IndivQLearningSlugsTerminateOnCollision/234_23_4	none		True	-10		False	GridWorld	SUNY	FullObsDiscrete	Individual_Q	1.0	0.05	2500000	True	4	True	IndivQLearningSlugsTerminateOnCollision/234_23_4_slugs_decentralized	slugs_decentralized	shields/general_shield	False	0.05
IndivQLearningSlugsTerminateOnCollision/234_23_4	none		True	-10		False	GridWorld	SUNY	FullObsDiscrete	Individual_Q	1.0	0.05	2500000	True	4	True	IndivQLearningSlugsTerminateOnCollision/234_23_4_none	none			0.05
IndivQLearningSlugsTerminateOnCollision/235_23_5	none		True	-10		False	GridWorld	SUNY	FullObsDiscrete	Individual_Q	1.0	0.05	2500000	True	5	True	IndivQLearningSlugsTerminateOnCollision/235_23_5_slugs_centralized	slugs_centralized	shields/general_shield		0.05
IndivQLearningSlugsTerminateOnCollision/235_23_5	none		True	-10		False	GridWorld	SUNY	FullObsDiscrete	Individual_Q	1.0	0.05	2500000	True	5	True	IndivQLearningSlugsTerminateOnCollision/235_23_5_slugs_decentralized	slugs_decentralized	shields/general_shield	False	0.05
IndivQLearningSlugsTerminateOnCollision/235_23_5	none		True	-10		False	GridWorld	SUNY	FullObsDiscrete	Individual_Q	1.0	0.05	2500000	True	5	True	IndivQLearningSlugsTerminateOnCollision/235_23_5_none	none			0.05
IndivQLearningSlugsTerminateOnCollision/236_23_6	none		True	-10		False	GridWorld	SUNY	FullObsDiscrete	Individual_Q	1.0	0.05	2500000	True	6	True	IndivQLearningSlugsTerminateOnCollision/236_23_6_slugs_centralized	slugs_centralized	shields/general_shield		0.05
IndivQLearningSlugsTerminateOnCollision/236_23_6	none		True	-10		False	GridWorld	SUNY	FullObsDiscrete	Individual_Q	1.0	0.05	2500000	True	6	True	IndivQLearningSlugsTerminateOnCollision/236_23_6_slugs_decentralized	slugs_decentralized	shields/general_shield	False	0.05
IndivQLearningSlugsTerminateOnCollision/236_23_6	none		True	-10		False	GridWorld	SUNY	FullObsDiscrete	Individual_Q	1.0	0.05	2500000	True	6	True	IndivQLearningSlugsTerminateOnCollision/236_23_6_none	none			0.05
IndivQLearningSlugsTerminateOnCollision/237_23_7	none		True	-10		False	GridWorld	SUNY	FullObsDiscrete	Individual_Q	1.0	0.05	2500000	True	7	True	IndivQLearningSlugsTerminateOnCollision/237_23_7_slugs_centralized	slugs_centralized	shields/general_shield		0.05
IndivQLearningSlugsTerminateOnCollision/237_23_7	none		True	-10		False	GridWorld	SUNY	FullObsDiscrete	Individual_Q	1.0	0.05	2500000	True	7	True	IndivQLearningSlugsTerminateOnCollision/237_23_7_slugs_decentralized	slugs_decentralized	shields/general_shield	False	0.05
IndivQLearningSlugsTerminateOnCollision/237_23_7	none		True	-10		False	GridWorld	SUNY	FullObsDiscrete	Individual_Q	1.0	0.05	2500000	True	7	True	IndivQLearningSlugsTerminateOnCollision/237_23_7_none	none			0.05
IndivQLearningSlugsTerminateOnCollision/238_23_8	none		True	-10		False	GridWorld	SUNY	FullObsDiscrete	Individual_Q	1.0	0.05	2500000	True	8	True	IndivQLearningSlugsTerminateOnCollision/238_23_8_slugs_centralized	slugs_centralized	shields/general_shield		0.05
IndivQLearningSlugsTerminateOnCollision/238_23_8	none		True	-10		False	GridWorld	SUNY	FullObsDiscrete	Individual_Q	1.0	0.05	2500000	True	8	True	IndivQLearningSlugsTerminateOnCollision/238_23_8_slugs_decentralized	slugs_decentralized	shields/general_shield	False	0.05
IndivQLearningSlugsTerminateOnCollision/238_23_8	none		True	-10		False	GridWorld	SUNY	FullObsDiscrete	Individual_Q	1.0	0.05	2500000	True	8	True	IndivQLearningSlugsTerminateOnCollision/238_23_8_none	none			0.05
IndivQLearningSlugsTerminateOnCollision/239_23_9	none		True	-10		False	GridWorld	SUNY	FullObsDiscrete	Individual_Q	1.0	0.05	2500000	True	9	True	IndivQLearningSlugsTerminateOnCollision/239_23_9_slugs_centralized	slugs_centralized	shields/general_shield		0.05
IndivQLearningSlugsTerminateOnCollision/239_23_9	none		True	-10		False	GridWorld	SUNY	FullObsDiscrete	Individual_Q	1.0	0.05	2500000	True	9	True	IndivQLearningSlugsTerminateOnCollision/239_23_9_slugs_decentralized	slugs_decentralized	shields/general_shield	False	0.05
IndivQLearningSlugsTerminateOnCollision/239_23_9	none		True	-10		False	GridWorld	SUNY	FullObsDiscrete	Individual_Q	1.0	0.05	2500000	True	9	True	IndivQLearningSlugsTerminateOnCollision/239_23_9_none	none			0.05
