# Supplementary material
Source: ML conference proceedings conference paper supplement (https://proceedings.neurips.cc/paper_files/paper/2022/hash/57444e14ecd9e2c8f603b4f012ce3811-Abstract.html)
Supplement: Supplementary file 1 [file 57444e14ecd9e2c8f603b4f012ce3811-Supplemental-Conference.zip › 3410_shield_decentralization_for_sa-Supplementary Material/parallel_configs/IndivQLearningSlugsTerminateOnCollisionTrain.csv]

run_name	shield	shield_specification	punish_unsafe_orig_action	punish_unsafe_orig_action_modifier	shield_decentralized_random_agent_order	randomize_starts	map_type	grid_world_map_name	grid_world_obs_type	learner_type	learner_anneal_eps_start	learner_anneal_eps_finish	max_total_steps	grid_world_terminate_on_collision	seed	skip_evaluation
IndivQLearningSlugsTerminateOnCollision/0_0_0	slugs_centralized	shields/general_shield	True	-10		True	GridWorld	Pentagon	FullObsDiscrete	Individual_Q	1.0	0.05	2500000	True	0	True
IndivQLearningSlugsTerminateOnCollision/1_0_1	slugs_centralized	shields/general_shield	True	-10		True	GridWorld	Pentagon	FullObsDiscrete	Individual_Q	1.0	0.05	2500000	True	1	True
IndivQLearningSlugsTerminateOnCollision/2_0_2	slugs_centralized	shields/general_shield	True	-10		True	GridWorld	Pentagon	FullObsDiscrete	Individual_Q	1.0	0.05	2500000	True	2	True
IndivQLearningSlugsTerminateOnCollision/3_0_3	slugs_centralized	shields/general_shield	True	-10		True	GridWorld	Pentagon	FullObsDiscrete	Individual_Q	1.0	0.05	2500000	True	3	True
IndivQLearningSlugsTerminateOnCollision/4_0_4	slugs_centralized	shields/general_shield	True	-10		True	GridWorld	Pentagon	FullObsDiscrete	Individual_Q	1.0	0.05	2500000	True	4	True
IndivQLearningSlugsTerminateOnCollision/5_0_5	slugs_centralized	shields/general_shield	True	-10		True	GridWorld	Pentagon	FullObsDiscrete	Individual_Q	1.0	0.05	2500000	True	5	True
IndivQLearningSlugsTerminateOnCollision/6_0_6	slugs_centralized	shields/general_shield	True	-10		True	GridWorld	Pentagon	FullObsDiscrete	Individual_Q	1.0	0.05	2500000	True	6	True
IndivQLearningSlugsTerminateOnCollision/7_0_7	slugs_centralized	shields/general_shield	True	-10		True	GridWorld	Pentagon	FullObsDiscrete	Individual_Q	1.0	0.05	2500000	True	7	True
IndivQLearningSlugsTerminateOnCollision/8_0_8	slugs_centralized	shields/general_shield	True	-10		True	GridWorld	Pentagon	FullObsDiscrete	Individual_Q	1.0	0.05	2500000	True	8	True
IndivQLearningSlugsTerminateOnCollision/9_0_9	slugs_centralized	shields/general_shield	True	-10		True	GridWorld	Pentagon	FullObsDiscrete	Individual_Q	1.0	0.05	2500000	True	9	True
IndivQLearningSlugsTerminateOnCollision/10_1_0	slugs_decentralized	shields/general_shield	True	-10	False	True	GridWorld	Pentagon	FullObsDiscrete	Individual_Q	1.0	0.05	2500000	True	0	True
IndivQLearningSlugsTerminateOnCollision/11_1_1	slugs_decentralized	shields/general_shield	True	-10	False	True	GridWorld	Pentagon	FullObsDiscrete	Individual_Q	1.0	0.05	2500000	True	1	True
IndivQLearningSlugsTerminateOnCollision/12_1_2	slugs_decentralized	shields/general_shield	True	-10	False	True	GridWorld	Pentagon	FullObsDiscrete	Individual_Q	1.0	0.05	2500000	True	2	True
IndivQLearningSlugsTerminateOnCollision/13_1_3	slugs_decentralized	shields/general_shield	True	-10	False	True	GridWorld	Pentagon	FullObsDiscrete	Individual_Q	1.0	0.05	2500000	True	3	True
IndivQLearningSlugsTerminateOnCollision/14_1_4	slugs_decentralized	shields/general_shield	True	-10	False	True	GridWorld	Pentagon	FullObsDiscrete	Individual_Q	1.0	0.05	2500000	True	4	True
IndivQLearningSlugsTerminateOnCollision/15_1_5	slugs_decentralized	shields/general_shield	True	-10	False	True	GridWorld	Pentagon	FullObsDiscrete	Individual_Q	1.0	0.05	2500000	True	5	True
IndivQLearningSlugsTerminateOnCollision/16_1_6	slugs_decentralized	shields/general_shield	True	-10	False	True	GridWorld	Pentagon	FullObsDiscrete	Individual_Q	1.0	0.05	2500000	True	6	True
IndivQLearningSlugsTerminateOnCollision/17_1_7	slugs_decentralized	shields/general_shield	True	-10	False	True	GridWorld	Pentagon	FullObsDiscrete	Individual_Q	1.0	0.05	2500000	True	7	True
IndivQLearningSlugsTerminateOnCollision/18_1_8	slugs_decentralized	shields/general_shield	True	-10	False	True	GridWorld	Pentagon	FullObsDiscrete	Individual_Q	1.0	0.05	2500000	True	8	True
IndivQLearningSlugsTerminateOnCollision/19_1_9	slugs_decentralized	shields/general_shield	True	-10	False	True	GridWorld	Pentagon	FullObsDiscrete	Individual_Q	1.0	0.05	2500000	True	9	True
IndivQLearningSlugsTerminateOnCollision/20_2_0	none		True	-10		True	GridWorld	Pentagon	FullObsDiscrete	Individual_Q	1.0	0.05	2500000	True	0	True
IndivQLearningSlugsTerminateOnCollision/21_2_1	none		True	-10		True	GridWorld	Pentagon	FullObsDiscrete	Individual_Q	1.0	0.05	2500000	True	1	True
IndivQLearningSlugsTerminateOnCollision/22_2_2	none		True	-10		True	GridWorld	Pentagon	FullObsDiscrete	Individual_Q	1.0	0.05	2500000	True	2	True
IndivQLearningSlugsTerminateOnCollision/23_2_3	none		True	-10		True	GridWorld	Pentagon	FullObsDiscrete	Individual_Q	1.0	0.05	2500000	True	3	True
IndivQLearningSlugsTerminateOnCollision/24_2_4	none		True	-10		True	GridWorld	Pentagon	FullObsDiscrete	Individual_Q	1.0	0.05	2500000	True	4	True
IndivQLearningSlugsTerminateOnCollision/25_2_5	none		True	-10		True	GridWorld	Pentagon	FullObsDiscrete	Individual_Q	1.0	0.05	2500000	True	5	True
IndivQLearningSlugsTerminateOnCollision/26_2_6	none		True	-10		True	GridWorld	Pentagon	FullObsDiscrete	Individual_Q	1.0	0.05	2500000	True	6	True
IndivQLearningSlugsTerminateOnCollision/27_2_7	none		True	-10		True	GridWorld	Pentagon	FullObsDiscrete	Individual_Q	1.0	0.05	2500000	True	7	True
IndivQLearningSlugsTerminateOnCollision/28_2_8	none		True	-10		True	GridWorld	Pentagon	FullObsDiscrete	Individual_Q	1.0	0.05	2500000	True	8	True
IndivQLearningSlugsTerminateOnCollision/29_2_9	none		True	-10		True	GridWorld	Pentagon	FullObsDiscrete	Individual_Q	1.0	0.05	2500000	True	9	True
IndivQLearningSlugsTerminateOnCollision/30_3_0	slugs_centralized	shields/general_shield	True	-10		False	GridWorld	Pentagon	FullObsDiscrete	Individual_Q	1.0	0.05	2500000	True	0	True
IndivQLearningSlugsTerminateOnCollision/31_3_1	slugs_centralized	shields/general_shield	True	-10		False	GridWorld	Pentagon	FullObsDiscrete	Individual_Q	1.0	0.05	2500000	True	1	True
IndivQLearningSlugsTerminateOnCollision/32_3_2	slugs_centralized	shields/general_shield	True	-10		False	GridWorld	Pentagon	FullObsDiscrete	Individual_Q	1.0	0.05	2500000	True	2	True
IndivQLearningSlugsTerminateOnCollision/33_3_3	slugs_centralized	shields/general_shield	True	-10		False	GridWorld	Pentagon	FullObsDiscrete	Individual_Q	1.0	0.05	2500000	True	3	True
IndivQLearningSlugsTerminateOnCollision/34_3_4	slugs_centralized	shields/general_shield	True	-10		False	GridWorld	Pentagon	FullObsDiscrete	Individual_Q	1.0	0.05	2500000	True	4	True
IndivQLearningSlugsTerminateOnCollision/35_3_5	slugs_centralized	shields/general_shield	True	-10		False	GridWorld	Pentagon	FullObsDiscrete	Individual_Q	1.0	0.05	2500000	True	5	True
IndivQLearningSlugsTerminateOnCollision/36_3_6	slugs_centralized	shields/general_shield	True	-10		False	GridWorld	Pentagon	FullObsDiscrete	Individual_Q	1.0	0.05	2500000	True	6	True
IndivQLearningSlugsTerminateOnCollision/37_3_7	slugs_centralized	shields/general_shield	True	-10		False	GridWorld	Pentagon	FullObsDiscrete	Individual_Q	1.0	0.05	2500000	True	7	True
IndivQLearningSlugsTerminateOnCollision/38_3_8	slugs_centralized	shields/general_shield	True	-10		False	GridWorld	Pentagon	FullObsDiscrete	Individual_Q	1.0	0.05	2500000	True	8	True
IndivQLearningSlugsTerminateOnCollision/39_3_9	slugs_centralized	shields/general_shield	True	-10		False	GridWorld	Pentagon	FullObsDiscrete	Individual_Q	1.0	0.05	2500000	True	9	True
IndivQLearningSlugsTerminateOnCollision/40_4_0	slugs_decentralized	shields/general_shield	True	-10	False	False	GridWorld	Pentagon	FullObsDiscrete	Individual_Q	1.0	0.05	2500000	True	0	True
IndivQLearningSlugsTerminateOnCollision/41_4_1	slugs_decentralized	shields/general_shield	True	-10	False	False	GridWorld	Pentagon	FullObsDiscrete	Individual_Q	1.0	0.05	2500000	True	1	True
IndivQLearningSlugsTerminateOnCollision/42_4_2	slugs_decentralized	shields/general_shield	True	-10	False	False	GridWorld	Pentagon	FullObsDiscrete	Individual_Q	1.0	0.05	2500000	True	2	True
IndivQLearningSlugsTerminateOnCollision/43_4_3	slugs_decentralized	shields/general_shield	True	-10	False	False	GridWorld	Pentagon	FullObsDiscrete	Individual_Q	1.0	0.05	2500000	True	3	True
IndivQLearningSlugsTerminateOnCollision/44_4_4	slugs_decentralized	shields/general_shield	True	-10	False	False	GridWorld	Pentagon	FullObsDiscrete	Individual_Q	1.0	0.05	2500000	True	4	True
IndivQLearningSlugsTerminateOnCollision/45_4_5	slugs_decentralized	shields/general_shield	True	-10	False	False	GridWorld	Pentagon	FullObsDiscrete	Individual_Q	1.0	0.05	2500000	True	5	True
IndivQLearningSlugsTerminateOnCollision/46_4_6	slugs_decentralized	shields/general_shield	True	-10	False	False	GridWorld	Pentagon	FullObsDiscrete	Individual_Q	1.0	0.05	2500000	True	6	True
IndivQLearningSlugsTerminateOnCollision/47_4_7	slugs_decentralized	shields/general_shield	True	-10	False	False	GridWorld	Pentagon	FullObsDiscrete	Individual_Q	1.0	0.05	2500000	True	7	True
IndivQLearningSlugsTerminateOnCollision/48_4_8	slugs_decentralized	shields/general_shield	True	-10	False	False	GridWorld	Pentagon	FullObsDiscrete	Individual_Q	1.0	0.05	2500000	True	8	True
IndivQLearningSlugsTerminateOnCollision/49_4_9	slugs_decentralized	shields/general_shield	True	-10	False	False	GridWorld	Pentagon	FullObsDiscrete	Individual_Q	1.0	0.05	2500000	True	9	True
IndivQLearningSlugsTerminateOnCollision/50_5_0	none		True	-10		False	GridWorld	Pentagon	FullObsDiscrete	Individual_Q	1.0	0.05	2500000	True	0	True
IndivQLearningSlugsTerminateOnCollision/51_5_1	none		True	-10		False	GridWorld	Pentagon	FullObsDiscrete	Individual_Q	1.0	0.05	2500000	True	1	True
IndivQLearningSlugsTerminateOnCollision/52_5_2	none		True	-10		False	GridWorld	Pentagon	FullObsDiscrete	Individual_Q	1.0	0.05	2500000	True	2	True
IndivQLearningSlugsTerminateOnCollision/53_5_3	none		True	-10		False	GridWorld	Pentagon	FullObsDiscrete	Individual_Q	1.0	0.05	2500000	True	3	True
IndivQLearningSlugsTerminateOnCollision/54_5_4	none		True	-10		False	GridWorld	Pentagon	FullObsDiscrete	Individual_Q	1.0	0.05	2500000	True	4	True
IndivQLearningSlugsTerminateOnCollision/55_5_5	none		True	-10		False	GridWorld	Pentagon	FullObsDiscrete	Individual_Q	1.0	0.05	2500000	True	5	True
IndivQLearningSlugsTerminateOnCollision/56_5_6	none		True	-10		False	GridWorld	Pentagon	FullObsDiscrete	Individual_Q	1.0	0.05	2500000	True	6	True
IndivQLearningSlugsTerminateOnCollision/57_5_7	none		True	-10		False	GridWorld	Pentagon	FullObsDiscrete	Individual_Q	1.0	0.05	2500000	True	7	True
IndivQLearningSlugsTerminateOnCollision/58_5_8	none		True	-10		False	GridWorld	Pentagon	FullObsDiscrete	Individual_Q	1.0	0.05	2500000	True	8	True
IndivQLearningSlugsTerminateOnCollision/59_5_9	none		True	-10		False	GridWorld	Pentagon	FullObsDiscrete	Individual_Q	1.0	0.05	2500000	True	9	True
IndivQLearningSlugsTerminateOnCollision/60_6_0	slugs_centralized	shields/general_shield	True	-10		True	GridWorld	ISR	FullObsDiscrete	Individual_Q	1.0	0.05	2500000	True	0	True
IndivQLearningSlugsTerminateOnCollision/61_6_1	slugs_centralized	shields/general_shield	True	-10		True	GridWorld	ISR	FullObsDiscrete	Individual_Q	1.0	0.05	2500000	True	1	True
IndivQLearningSlugsTerminateOnCollision/62_6_2	slugs_centralized	shields/general_shield	True	-10		True	GridWorld	ISR	FullObsDiscrete	Individual_Q	1.0	0.05	2500000	True	2	True
IndivQLearningSlugsTerminateOnCollision/63_6_3	slugs_centralized	shields/general_shield	True	-10		True	GridWorld	ISR	FullObsDiscrete	Individual_Q	1.0	0.05	2500000	True	3	True
IndivQLearningSlugsTerminateOnCollision/64_6_4	slugs_centralized	shields/general_shield	True	-10		True	GridWorld	ISR	FullObsDiscrete	Individual_Q	1.0	0.05	2500000	True	4	True
IndivQLearningSlugsTerminateOnCollision/65_6_5	slugs_centralized	shields/general_shield	True	-10		True	GridWorld	ISR	FullObsDiscrete	Individual_Q	1.0	0.05	2500000	True	5	True
IndivQLearningSlugsTerminateOnCollision/66_6_6	slugs_centralized	shields/general_shield	True	-10		True	GridWorld	ISR	FullObsDiscrete	Individual_Q	1.0	0.05	2500000	True	6	True
IndivQLearningSlugsTerminateOnCollision/67_6_7	slugs_centralized	shields/general_shield	True	-10		True	GridWorld	ISR	FullObsDiscrete	Individual_Q	1.0	0.05	2500000	True	7	True
IndivQLearningSlugsTerminateOnCollision/68_6_8	slugs_centralized	shields/general_shield	True	-10		True	GridWorld	ISR	FullObsDiscrete	Individual_Q	1.0	0.05	2500000	True	8	True
IndivQLearningSlugsTerminateOnCollision/69_6_9	slugs_centralized	shields/general_shield	True	-10		True	GridWorld	ISR	FullObsDiscrete	Individual_Q	1.0	0.05	2500000	True	9	True
IndivQLearningSlugsTerminateOnCollision/70_7_0	slugs_decentralized	shields/general_shield	True	-10	False	True	GridWorld	ISR	FullObsDiscrete	Individual_Q	1.0	0.05	2500000	True	0	True
IndivQLearningSlugsTerminateOnCollision/71_7_1	slugs_decentralized	shields/general_shield	True	-10	False	True	GridWorld	ISR	FullObsDiscrete	Individual_Q	1.0	0.05	2500000	True	1	True
IndivQLearningSlugsTerminateOnCollision/72_7_2	slugs_decentralized	shields/general_shield	True	-10	False	True	GridWorld	ISR	FullObsDiscrete	Individual_Q	1.0	0.05	2500000	True	2	True
IndivQLearningSlugsTerminateOnCollision/73_7_3	slugs_decentralized	shields/general_shield	True	-10	False	True	GridWorld	ISR	FullObsDiscrete	Individual_Q	1.0	0.05	2500000	True	3	True
IndivQLearningSlugsTerminateOnCollision/74_7_4	slugs_decentralized	shields/general_shield	True	-10	False	True	GridWorld	ISR	FullObsDiscrete	Individual_Q	1.0	0.05	2500000	True	4	True
IndivQLearningSlugsTerminateOnCollision/75_7_5	slugs_decentralized	shields/general_shield	True	-10	False	True	GridWorld	ISR	FullObsDiscrete	Individual_Q	1.0	0.05	2500000	True	5	True
IndivQLearningSlugsTerminateOnCollision/76_7_6	slugs_decentralized	shields/general_shield	True	-10	False	True	GridWorld	ISR	FullObsDiscrete	Individual_Q	1.0	0.05	2500000	True	6	True
IndivQLearningSlugsTerminateOnCollision/77_7_7	slugs_decentralized	shields/general_shield	True	-10	False	True	GridWorld	ISR	FullObsDiscrete	Individual_Q	1.0	0.05	2500000	True	7	True
IndivQLearningSlugsTerminateOnCollision/78_7_8	slugs_decentralized	shields/general_shield	True	-10	False	True	GridWorld	ISR	FullObsDiscrete	Individual_Q	1.0	0.05	2500000	True	8	True
IndivQLearningSlugsTerminateOnCollision/79_7_9	slugs_decentralized	shields/general_shield	True	-10	False	True	GridWorld	ISR	FullObsDiscrete	Individual_Q	1.0	0.05	2500000	True	9	True
IndivQLearningSlugsTerminateOnCollision/80_8_0	none		True	-10		True	GridWorld	ISR	FullObsDiscrete	Individual_Q	1.0	0.05	2500000	True	0	True
IndivQLearningSlugsTerminateOnCollision/81_8_1	none		True	-10		True	GridWorld	ISR	FullObsDiscrete	Individual_Q	1.0	0.05	2500000	True	1	True
IndivQLearningSlugsTerminateOnCollision/82_8_2	none		True	-10		True	GridWorld	ISR	FullObsDiscrete	Individual_Q	1.0	0.05	2500000	True	2	True
IndivQLearningSlugsTerminateOnCollision/83_8_3	none		True	-10		True	GridWorld	ISR	FullObsDiscrete	Individual_Q	1.0	0.05	2500000	True	3	True
IndivQLearningSlugsTerminateOnCollision/84_8_4	none		True	-10		True	GridWorld	ISR	FullObsDiscrete	Individual_Q	1.0	0.05	2500000	True	4	True
IndivQLearningSlugsTerminateOnCollision/85_8_5	none		True	-10		True	GridWorld	ISR	FullObsDiscrete	Individual_Q	1.0	0.05	2500000	True	5	True
IndivQLearningSlugsTerminateOnCollision/86_8_6	none		True	-10		True	GridWorld	ISR	FullObsDiscrete	Individual_Q	1.0	0.05	2500000	True	6	True
IndivQLearningSlugsTerminateOnCollision/87_8_7	none		True	-10		True	GridWorld	ISR	FullObsDiscrete	Individual_Q	1.0	0.05	2500000	True	7	True
IndivQLearningSlugsTerminateOnCollision/88_8_8	none		True	-10		True	GridWorld	ISR	FullObsDiscrete	Individual_Q	1.0	0.05	2500000	True	8	True
IndivQLearningSlugsTerminateOnCollision/89_8_9	none		True	-10		True	GridWorld	ISR	FullObsDiscrete	Individual_Q	1.0	0.05	2500000	True	9	True
IndivQLearningSlugsTerminateOnCollision/90_9_0	slugs_centralized	shields/general_shield	True	-10		False	GridWorld	ISR	FullObsDiscrete	Individual_Q	1.0	0.05	2500000	True	0	True
IndivQLearningSlugsTerminateOnCollision/91_9_1	slugs_centralized	shields/general_shield	True	-10		False	GridWorld	ISR	FullObsDiscrete	Individual_Q	1.0	0.05	2500000	True	1	True
IndivQLearningSlugsTerminateOnCollision/92_9_2	slugs_centralized	shields/general_shield	True	-10		False	GridWorld	ISR	FullObsDiscrete	Individual_Q	1.0	0.05	2500000	True	2	True
IndivQLearningSlugsTerminateOnCollision/93_9_3	slugs_centralized	shields/general_shield	True	-10		False	GridWorld	ISR	FullObsDiscrete	Individual_Q	1.0	0.05	2500000	True	3	True
IndivQLearningSlugsTerminateOnCollision/94_9_4	slugs_centralized	shields/general_shield	True	-10		False	GridWorld	ISR	FullObsDiscrete	Individual_Q	1.0	0.05	2500000	True	4	True
IndivQLearningSlugsTerminateOnCollision/95_9_5	slugs_centralized	shields/general_shield	True	-10		False	GridWorld	ISR	FullObsDiscrete	Individual_Q	1.0	0.05	2500000	True	5	True
IndivQLearningSlugsTerminateOnCollision/96_9_6	slugs_centralized	shields/general_shield	True	-10		False	GridWorld	ISR	FullObsDiscrete	Individual_Q	1.0	0.05	2500000	True	6	True
IndivQLearningSlugsTerminateOnCollision/97_9_7	slugs_centralized	shields/general_shield	True	-10		False	GridWorld	ISR	FullObsDiscrete	Individual_Q	1.0	0.05	2500000	True	7	True
IndivQLearningSlugsTerminateOnCollision/98_9_8	slugs_centralized	shields/general_shield	True	-10		False	GridWorld	ISR	FullObsDiscrete	Individual_Q	1.0	0.05	2500000	True	8	True
IndivQLearningSlugsTerminateOnCollision/99_9_9	slugs_centralized	shields/general_shield	True	-10		False	GridWorld	ISR	FullObsDiscrete	Individual_Q	1.0	0.05	2500000	True	9	True
IndivQLearningSlugsTerminateOnCollision/100_10_0	slugs_decentralized	shields/general_shield	True	-10	False	False	GridWorld	ISR	FullObsDiscrete	Individual_Q	1.0	0.05	2500000	True	0	True
IndivQLearningSlugsTerminateOnCollision/101_10_1	slugs_decentralized	shields/general_shield	True	-10	False	False	GridWorld	ISR	FullObsDiscrete	Individual_Q	1.0	0.05	2500000	True	1	True
IndivQLearningSlugsTerminateOnCollision/102_10_2	slugs_decentralized	shields/general_shield	True	-10	False	False	GridWorld	ISR	FullObsDiscrete	Individual_Q	1.0	0.05	2500000	True	2	True
IndivQLearningSlugsTerminateOnCollision/103_10_3	slugs_decentralized	shields/general_shield	True	-10	False	False	GridWorld	ISR	FullObsDiscrete	Individual_Q	1.0	0.05	2500000	True	3	True
IndivQLearningSlugsTerminateOnCollision/104_10_4	slugs_decentralized	shields/general_shield	True	-10	False	False	GridWorld	ISR	FullObsDiscrete	Individual_Q	1.0	0.05	2500000	True	4	True
IndivQLearningSlugsTerminateOnCollision/105_10_5	slugs_decentralized	shields/general_shield	True	-10	False	False	GridWorld	ISR	FullObsDiscrete	Individual_Q	1.0	0.05	2500000	True	5	True
IndivQLearningSlugsTerminateOnCollision/106_10_6	slugs_decentralized	shields/general_shield	True	-10	False	False	GridWorld	ISR	FullObsDiscrete	Individual_Q	1.0	0.05	2500000	True	6	True
IndivQLearningSlugsTerminateOnCollision/107_10_7	slugs_decentralized	shields/general_shield	True	-10	False	False	GridWorld	ISR	FullObsDiscrete	Individual_Q	1.0	0.05	2500000	True	7	True
IndivQLearningSlugsTerminateOnCollision/108_10_8	slugs_decentralized	shields/general_shield	True	-10	False	False	GridWorld	ISR	FullObsDiscrete	Individual_Q	1.0	0.05	2500000	True	8	True
IndivQLearningSlugsTerminateOnCollision/109_10_9	slugs_decentralized	shields/general_shield	True	-10	False	False	GridWorld	ISR	FullObsDiscrete	Individual_Q	1.0	0.05	2500000	True	9	True
IndivQLearningSlugsTerminateOnCollision/110_11_0	none		True	-10		False	GridWorld	ISR	FullObsDiscrete	Individual_Q	1.0	0.05	2500000	True	0	True
IndivQLearningSlugsTerminateOnCollision/111_11_1	none		True	-10		False	GridWorld	ISR	FullObsDiscrete	Individual_Q	1.0	0.05	2500000	True	1	True
IndivQLearningSlugsTerminateOnCollision/112_11_2	none		True	-10		False	GridWorld	ISR	FullObsDiscrete	Individual_Q	1.0	0.05	2500000	True	2	True
IndivQLearningSlugsTerminateOnCollision/113_11_3	none		True	-10		False	GridWorld	ISR	FullObsDiscrete	Individual_Q	1.0	0.05	2500000	True	3	True
IndivQLearningSlugsTerminateOnCollision/114_11_4	none		True	-10		False	GridWorld	ISR	FullObsDiscrete	Individual_Q	1.0	0.05	2500000	True	4	True
IndivQLearningSlugsTerminateOnCollision/115_11_5	none		True	-10		False	GridWorld	ISR	FullObsDiscrete	Individual_Q	1.0	0.05	2500000	True	5	True
IndivQLearningSlugsTerminateOnCollision/116_11_6	none		True	-10		False	GridWorld	ISR	FullObsDiscrete	Individual_Q	1.0	0.05	2500000	True	6	True
IndivQLearningSlugsTerminateOnCollision/117_11_7	none		True	-10		False	GridWorld	ISR	FullObsDiscrete	Individual_Q	1.0	0.05	2500000	True	7	True
IndivQLearningSlugsTerminateOnCollision/118_11_8	none		True	-10		False	GridWorld	ISR	FullObsDiscrete	Individual_Q	1.0	0.05	2500000	True	8	True
IndivQLearningSlugsTerminateOnCollision/119_11_9	none		True	-10		False	GridWorld	ISR	FullObsDiscrete	Individual_Q	1.0	0.05	2500000	True	9	True
IndivQLearningSlugsTerminateOnCollision/120_12_0	slugs_centralized	shields/general_shield	True	-10		True	GridWorld	MIT	FullObsDiscrete	Individual_Q	1.0	0.05	2500000	True	0	True
IndivQLearningSlugsTerminateOnCollision/121_12_1	slugs_centralized	shields/general_shield	True	-10		True	GridWorld	MIT	FullObsDiscrete	Individual_Q	1.0	0.05	2500000	True	1	True
IndivQLearningSlugsTerminateOnCollision/122_12_2	slugs_centralized	shields/general_shield	True	-10		True	GridWorld	MIT	FullObsDiscrete	Individual_Q	1.0	0.05	2500000	True	2	True
IndivQLearningSlugsTerminateOnCollision/123_12_3	slugs_centralized	shields/general_shield	True	-10		True	GridWorld	MIT	FullObsDiscrete	Individual_Q	1.0	0.05	2500000	True	3	True
IndivQLearningSlugsTerminateOnCollision/124_12_4	slugs_centralized	shields/general_shield	True	-10		True	GridWorld	MIT	FullObsDiscrete	Individual_Q	1.0	0.05	2500000	True	4	True
IndivQLearningSlugsTerminateOnCollision/125_12_5	slugs_centralized	shields/general_shield	True	-10		True	GridWorld	MIT	FullObsDiscrete	Individual_Q	1.0	0.05	2500000	True	5	True
IndivQLearningSlugsTerminateOnCollision/126_12_6	slugs_centralized	shields/general_shield	True	-10		True	GridWorld	MIT	FullObsDiscrete	Individual_Q	1.0	0.05	2500000	True	6	True
IndivQLearningSlugsTerminateOnCollision/127_12_7	slugs_centralized	shields/general_shield	True	-10		True	GridWorld	MIT	FullObsDiscrete	Individual_Q	1.0	0.05	2500000	True	7	True
IndivQLearningSlugsTerminateOnCollision/128_12_8	slugs_centralized	shields/general_shield	True	-10		True	GridWorld	MIT	FullObsDiscrete	Individual_Q	1.0	0.05	2500000	True	8	True
IndivQLearningSlugsTerminateOnCollision/129_12_9	slugs_centralized	shields/general_shield	True	-10		True	GridWorld	MIT	FullObsDiscrete	Individual_Q	1.0	0.05	2500000	True	9	True
IndivQLearningSlugsTerminateOnCollision/130_13_0	slugs_decentralized	shields/general_shield	True	-10	False	True	GridWorld	MIT	FullObsDiscrete	Individual_Q	1.0	0.05	2500000	True	0	True
IndivQLearningSlugsTerminateOnCollision/131_13_1	slugs_decentralized	shields/general_shield	True	-10	False	True	GridWorld	MIT	FullObsDiscrete	Individual_Q	1.0	0.05	2500000	True	1	True
IndivQLearningSlugsTerminateOnCollision/132_13_2	slugs_decentralized	shields/general_shield	True	-10	False	True	GridWorld	MIT	FullObsDiscrete	Individual_Q	1.0	0.05	2500000	True	2	True
IndivQLearningSlugsTerminateOnCollision/133_13_3	slugs_decentralized	shields/general_shield	True	-10	False	True	GridWorld	MIT	FullObsDiscrete	Individual_Q	1.0	0.05	2500000	True	3	True
IndivQLearningSlugsTerminateOnCollision/134_13_4	slugs_decentralized	shields/general_shield	True	-10	False	True	GridWorld	MIT	FullObsDiscrete	Individual_Q	1.0	0.05	2500000	True	4	True
IndivQLearningSlugsTerminateOnCollision/135_13_5	slugs_decentralized	shields/general_shield	True	-10	False	True	GridWorld	MIT	FullObsDiscrete	Individual_Q	1.0	0.05	2500000	True	5	True
IndivQLearningSlugsTerminateOnCollision/136_13_6	slugs_decentralized	shields/general_shield	True	-10	False	True	GridWorld	MIT	FullObsDiscrete	Individual_Q	1.0	0.05	2500000	True	6	True
IndivQLearningSlugsTerminateOnCollision/137_13_7	slugs_decentralized	shields/general_shield	True	-10	False	True	GridWorld	MIT	FullObsDiscrete	Individual_Q	1.0	0.05	2500000	True	7	True
IndivQLearningSlugsTerminateOnCollision/138_13_8	slugs_decentralized	shields/general_shield	True	-10	False	True	GridWorld	MIT	FullObsDiscrete	Individual_Q	1.0	0.05	2500000	True	8	True
IndivQLearningSlugsTerminateOnCollision/139_13_9	slugs_decentralized	shields/general_shield	True	-10	False	True	GridWorld	MIT	FullObsDiscrete	Individual_Q	1.0	0.05	2500000	True	9	True
IndivQLearningSlugsTerminateOnCollision/140_14_0	none		True	-10		True	GridWorld	MIT	FullObsDiscrete	Individual_Q	1.0	0.05	2500000	True	0	True
IndivQLearningSlugsTerminateOnCollision/141_14_1	none		True	-10		True	GridWorld	MIT	FullObsDiscrete	Individual_Q	1.0	0.05	2500000	True	1	True
IndivQLearningSlugsTerminateOnCollision/142_14_2	none		True	-10		True	GridWorld	MIT	FullObsDiscrete	Individual_Q	1.0	0.05	2500000	True	2	True
IndivQLearningSlugsTerminateOnCollision/143_14_3	none		True	-10		True	GridWorld	MIT	FullObsDiscrete	Individual_Q	1.0	0.05	2500000	True	3	True
IndivQLearningSlugsTerminateOnCollision/144_14_4	none		True	-10		True	GridWorld	MIT	FullObsDiscrete	Individual_Q	1.0	0.05	2500000	True	4	True
IndivQLearningSlugsTerminateOnCollision/145_14_5	none		True	-10		True	GridWorld	MIT	FullObsDiscrete	Individual_Q	1.0	0.05	2500000	True	5	True
IndivQLearningSlugsTerminateOnCollision/146_14_6	none		True	-10		True	GridWorld	MIT	FullObsDiscrete	Individual_Q	1.0	0.05	2500000	True	6	True
IndivQLearningSlugsTerminateOnCollision/147_14_7	none		True	-10		True	GridWorld	MIT	FullObsDiscrete	Individual_Q	1.0	0.05	2500000	True	7	True
IndivQLearningSlugsTerminateOnCollision/148_14_8	none		True	-10		True	GridWorld	MIT	FullObsDiscrete	Individual_Q	1.0	0.05	2500000	True	8	True
IndivQLearningSlugsTerminateOnCollision/149_14_9	none		True	-10		True	GridWorld	MIT	FullObsDiscrete	Individual_Q	1.0	0.05	2500000	True	9	True
IndivQLearningSlugsTerminateOnCollision/150_15_0	slugs_centralized	shields/general_shield	True	-10		False	GridWorld	MIT	FullObsDiscrete	Individual_Q	1.0	0.05	2500000	True	0	True
IndivQLearningSlugsTerminateOnCollision/151_15_1	slugs_centralized	shields/general_shield	True	-10		False	GridWorld	MIT	FullObsDiscrete	Individual_Q	1.0	0.05	2500000	True	1	True
IndivQLearningSlugsTerminateOnCollision/152_15_2	slugs_centralized	shields/general_shield	True	-10		False	GridWorld	MIT	FullObsDiscrete	Individual_Q	1.0	0.05	2500000	True	2	True
IndivQLearningSlugsTerminateOnCollision/153_15_3	slugs_centralized	shields/general_shield	True	-10		False	GridWorld	MIT	FullObsDiscrete	Individual_Q	1.0	0.05	2500000	True	3	True
IndivQLearningSlugsTerminateOnCollision/154_15_4	slugs_centralized	shields/general_shield	True	-10		False	GridWorld	MIT	FullObsDiscrete	Individual_Q	1.0	0.05	2500000	True	4	True
IndivQLearningSlugsTerminateOnCollision/155_15_5	slugs_centralized	shields/general_shield	True	-10		False	GridWorld	MIT	FullObsDiscrete	Individual_Q	1.0	0.05	2500000	True	5	True
IndivQLearningSlugsTerminateOnCollision/156_15_6	slugs_centralized	shields/general_shield	True	-10		False	GridWorld	MIT	FullObsDiscrete	Individual_Q	1.0	0.05	2500000	True	6	True
IndivQLearningSlugsTerminateOnCollision/157_15_7	slugs_centralized	shields/general_shield	True	-10		False	GridWorld	MIT	FullObsDiscrete	Individual_Q	1.0	0.05	2500000	True	7	True
IndivQLearningSlugsTerminateOnCollision/158_15_8	slugs_centralized	shields/general_shield	True	-10		False	GridWorld	MIT	FullObsDiscrete	Individual_Q	1.0	0.05	2500000	True	8	True
IndivQLearningSlugsTerminateOnCollision/159_15_9	slugs_centralized	shields/general_shield	True	-10		False	GridWorld	MIT	FullObsDiscrete	Individual_Q	1.0	0.05	2500000	True	9	True
IndivQLearningSlugsTerminateOnCollision/160_16_0	slugs_decentralized	shields/general_shield	True	-10	False	False	GridWorld	MIT	FullObsDiscrete	Individual_Q	1.0	0.05	2500000	True	0	True
IndivQLearningSlugsTerminateOnCollision/161_16_1	slugs_decentralized	shields/general_shield	True	-10	False	False	GridWorld	MIT	FullObsDiscrete	Individual_Q	1.0	0.05	2500000	True	1	True
IndivQLearningSlugsTerminateOnCollision/162_16_2	slugs_decentralized	shields/general_shield	True	-10	False	False	GridWorld	MIT	FullObsDiscrete	Individual_Q	1.0	0.05	2500000	True	2	True
IndivQLearningSlugsTerminateOnCollision/163_16_3	slugs_decentralized	shields/general_shield	True	-10	False	False	GridWorld	MIT	FullObsDiscrete	Individual_Q	1.0	0.05	2500000	True	3	True
IndivQLearningSlugsTerminateOnCollision/164_16_4	slugs_decentralized	shields/general_shield	True	-10	False	False	GridWorld	MIT	FullObsDiscrete	Individual_Q	1.0	0.05	2500000	True	4	True
IndivQLearningSlugsTerminateOnCollision/165_16_5	slugs_decentralized	shields/general_shield	True	-10	False	False	GridWorld	MIT	FullObsDiscrete	Individual_Q	1.0	0.05	2500000	True	5	True
IndivQLearningSlugsTerminateOnCollision/166_16_6	slugs_decentralized	shields/general_shield	True	-10	False	False	GridWorld	MIT	FullObsDiscrete	Individual_Q	1.0	0.05	2500000	True	6	True
IndivQLearningSlugsTerminateOnCollision/167_16_7	slugs_decentralized	shields/general_shield	True	-10	False	False	GridWorld	MIT	FullObsDiscrete	Individual_Q	1.0	0.05	2500000	True	7	True
IndivQLearningSlugsTerminateOnCollision/168_16_8	slugs_decentralized	shields/general_shield	True	-10	False	False	GridWorld	MIT	FullObsDiscrete	Individual_Q	1.0	0.05	2500000	True	8	True
IndivQLearningSlugsTerminateOnCollision/169_16_9	slugs_decentralized	shields/general_shield	True	-10	False	False	GridWorld	MIT	FullObsDiscrete	Individual_Q	1.0	0.05	2500000	True	9	True
IndivQLearningSlugsTerminateOnCollision/170_17_0	none		True	-10		False	GridWorld	MIT	FullObsDiscrete	Individual_Q	1.0	0.05	2500000	True	0	True
IndivQLearningSlugsTerminateOnCollision/171_17_1	none		True	-10		False	GridWorld	MIT	FullObsDiscrete	Individual_Q	1.0	0.05	2500000	True	1	True
IndivQLearningSlugsTerminateOnCollision/172_17_2	none		True	-10		False	GridWorld	MIT	FullObsDiscrete	Individual_Q	1.0	0.05	2500000	True	2	True
IndivQLearningSlugsTerminateOnCollision/173_17_3	none		True	-10		False	GridWorld	MIT	FullObsDiscrete	Individual_Q	1.0	0.05	2500000	True	3	True
IndivQLearningSlugsTerminateOnCollision/174_17_4	none		True	-10		False	GridWorld	MIT	FullObsDiscrete	Individual_Q	1.0	0.05	2500000	True	4	True
IndivQLearningSlugsTerminateOnCollision/175_17_5	none		True	-10		False	GridWorld	MIT	FullObsDiscrete	Individual_Q	1.0	0.05	2500000	True	5	True
IndivQLearningSlugsTerminateOnCollision/176_17_6	none		True	-10		False	GridWorld	MIT	FullObsDiscrete	Individual_Q	1.0	0.05	2500000	True	6	True
IndivQLearningSlugsTerminateOnCollision/177_17_7	none		True	-10		False	GridWorld	MIT	FullObsDiscrete	Individual_Q	1.0	0.05	2500000	True	7	True
IndivQLearningSlugsTerminateOnCollision/178_17_8	none		True	-10		False	GridWorld	MIT	FullObsDiscrete	Individual_Q	1.0	0.05	2500000	True	8	True
IndivQLearningSlugsTerminateOnCollision/179_17_9	none		True	-10		False	GridWorld	MIT	FullObsDiscrete	Individual_Q	1.0	0.05	2500000	True	9	True
IndivQLearningSlugsTerminateOnCollision/180_18_0	slugs_centralized	shields/general_shield	True	-10		True	GridWorld	SUNY	FullObsDiscrete	Individual_Q	1.0	0.05	2500000	True	0	True
IndivQLearningSlugsTerminateOnCollision/181_18_1	slugs_centralized	shields/general_shield	True	-10		True	GridWorld	SUNY	FullObsDiscrete	Individual_Q	1.0	0.05	2500000	True	1	True
IndivQLearningSlugsTerminateOnCollision/182_18_2	slugs_centralized	shields/general_shield	True	-10		True	GridWorld	SUNY	FullObsDiscrete	Individual_Q	1.0	0.05	2500000	True	2	True
IndivQLearningSlugsTerminateOnCollision/183_18_3	slugs_centralized	shields/general_shield	True	-10		True	GridWorld	SUNY	FullObsDiscrete	Individual_Q	1.0	0.05	2500000	True	3	True
IndivQLearningSlugsTerminateOnCollision/184_18_4	slugs_centralized	shields/general_shield	True	-10		True	GridWorld	SUNY	FullObsDiscrete	Individual_Q	1.0	0.05	2500000	True	4	True
IndivQLearningSlugsTerminateOnCollision/185_18_5	slugs_centralized	shields/general_shield	True	-10		True	GridWorld	SUNY	FullObsDiscrete	Individual_Q	1.0	0.05	2500000	True	5	True
IndivQLearningSlugsTerminateOnCollision/186_18_6	slugs_centralized	shields/general_shield	True	-10		True	GridWorld	SUNY	FullObsDiscrete	Individual_Q	1.0	0.05	2500000	True	6	True
IndivQLearningSlugsTerminateOnCollision/187_18_7	slugs_centralized	shields/general_shield	True	-10		True	GridWorld	SUNY	FullObsDiscrete	Individual_Q	1.0	0.05	2500000	True	7	True
IndivQLearningSlugsTerminateOnCollision/188_18_8	slugs_centralized	shields/general_shield	True	-10		True	GridWorld	SUNY	FullObsDiscrete	Individual_Q	1.0	0.05	2500000	True	8	True
IndivQLearningSlugsTerminateOnCollision/189_18_9	slugs_centralized	shields/general_shield	True	-10		True	GridWorld	SUNY	FullObsDiscrete	Individual_Q	1.0	0.05	2500000	True	9	True
IndivQLearningSlugsTerminateOnCollision/190_19_0	slugs_decentralized	shields/general_shield	True	-10	False	True	GridWorld	SUNY	FullObsDiscrete	Individual_Q	1.0	0.05	2500000	True	0	True
IndivQLearningSlugsTerminateOnCollision/191_19_1	slugs_decentralized	shields/general_shield	True	-10	False	True	GridWorld	SUNY	FullObsDiscrete	Individual_Q	1.0	0.05	2500000	True	1	True
IndivQLearningSlugsTerminateOnCollision/192_19_2	slugs_decentralized	shields/general_shield	True	-10	False	True	GridWorld	SUNY	FullObsDiscrete	Individual_Q	1.0	0.05	2500000	True	2	True
IndivQLearningSlugsTerminateOnCollision/193_19_3	slugs_decentralized	shields/general_shield	True	-10	False	True	GridWorld	SUNY	FullObsDiscrete	Individual_Q	1.0	0.05	2500000	True	3	True
IndivQLearningSlugsTerminateOnCollision/194_19_4	slugs_decentralized	shields/general_shield	True	-10	False	True	GridWorld	SUNY	FullObsDiscrete	Individual_Q	1.0	0.05	2500000	True	4	True
IndivQLearningSlugsTerminateOnCollision/195_19_5	slugs_decentralized	shields/general_shield	True	-10	False	True	GridWorld	SUNY	FullObsDiscrete	Individual_Q	1.0	0.05	2500000	True	5	True
IndivQLearningSlugsTerminateOnCollision/196_19_6	slugs_decentralized	shields/general_shield	True	-10	False	True	GridWorld	SUNY	FullObsDiscrete	Individual_Q	1.0	0.05	2500000	True	6	True
IndivQLearningSlugsTerminateOnCollision/197_19_7	slugs_decentralized	shields/general_shield	True	-10	False	True	GridWorld	SUNY	FullObsDiscrete	Individual_Q	1.0	0.05	2500000	True	7	True
IndivQLearningSlugsTerminateOnCollision/198_19_8	slugs_decentralized	shields/general_shield	True	-10	False	True	GridWorld	SUNY	FullObsDiscrete	Individual_Q	1.0	0.05	2500000	True	8	True
IndivQLearningSlugsTerminateOnCollision/199_19_9	slugs_decentralized	shields/general_shield	True	-10	False	True	GridWorld	SUNY	FullObsDiscrete	Individual_Q	1.0	0.05	2500000	True	9	True
IndivQLearningSlugsTerminateOnCollision/200_20_0	none		True	-10		True	GridWorld	SUNY	FullObsDiscrete	Individual_Q	1.0	0.05	2500000	True	0	True
IndivQLearningSlugsTerminateOnCollision/201_20_1	none		True	-10		True	GridWorld	SUNY	FullObsDiscrete	Individual_Q	1.0	0.05	2500000	True	1	True
IndivQLearningSlugsTerminateOnCollision/202_20_2	none		True	-10		True	GridWorld	SUNY	FullObsDiscrete	Individual_Q	1.0	0.05	2500000	True	2	True
IndivQLearningSlugsTerminateOnCollision/203_20_3	none		True	-10		True	GridWorld	SUNY	FullObsDiscrete	Individual_Q	1.0	0.05	2500000	True	3	True
IndivQLearningSlugsTerminateOnCollision/204_20_4	none		True	-10		True	GridWorld	SUNY	FullObsDiscrete	Individual_Q	1.0	0.05	2500000	True	4	True
IndivQLearningSlugsTerminateOnCollision/205_20_5	none		True	-10		True	GridWorld	SUNY	FullObsDiscrete	Individual_Q	1.0	0.05	2500000	True	5	True
IndivQLearningSlugsTerminateOnCollision/206_20_6	none		True	-10		True	GridWorld	SUNY	FullObsDiscrete	Individual_Q	1.0	0.05	2500000	True	6	True
IndivQLearningSlugsTerminateOnCollision/207_20_7	none		True	-10		True	GridWorld	SUNY	FullObsDiscrete	Individual_Q	1.0	0.05	2500000	True	7	True
IndivQLearningSlugsTerminateOnCollision/208_20_8	none		True	-10		True	GridWorld	SUNY	FullObsDiscrete	Individual_Q	1.0	0.05	2500000	True	8	True
IndivQLearningSlugsTerminateOnCollision/209_20_9	none		True	-10		True	GridWorld	SUNY	FullObsDiscrete	Individual_Q	1.0	0.05	2500000	True	9	True
IndivQLearningSlugsTerminateOnCollision/210_21_0	slugs_centralized	shields/general_shield	True	-10		False	GridWorld	SUNY	FullObsDiscrete	Individual_Q	1.0	0.05	2500000	True	0	True
IndivQLearningSlugsTerminateOnCollision/211_21_1	slugs_centralized	shields/general_shield	True	-10		False	GridWorld	SUNY	FullObsDiscrete	Individual_Q	1.0	0.05	2500000	True	1	True
IndivQLearningSlugsTerminateOnCollision/212_21_2	slugs_centralized	shields/general_shield	True	-10		False	GridWorld	SUNY	FullObsDiscrete	Individual_Q	1.0	0.05	2500000	True	2	True
IndivQLearningSlugsTerminateOnCollision/213_21_3	slugs_centralized	shields/general_shield	True	-10		False	GridWorld	SUNY	FullObsDiscrete	Individual_Q	1.0	0.05	2500000	True	3	True
IndivQLearningSlugsTerminateOnCollision/214_21_4	slugs_centralized	shields/general_shield	True	-10		False	GridWorld	SUNY	FullObsDiscrete	Individual_Q	1.0	0.05	2500000	True	4	True
IndivQLearningSlugsTerminateOnCollision/215_21_5	slugs_centralized	shields/general_shield	True	-10		False	GridWorld	SUNY	FullObsDiscrete	Individual_Q	1.0	0.05	2500000	True	5	True
IndivQLearningSlugsTerminateOnCollision/216_21_6	slugs_centralized	shields/general_shield	True	-10		False	GridWorld	SUNY	FullObsDiscrete	Individual_Q	1.0	0.05	2500000	True	6	True
IndivQLearningSlugsTerminateOnCollision/217_21_7	slugs_centralized	shields/general_shield	True	-10		False	GridWorld	SUNY	FullObsDiscrete	Individual_Q	1.0	0.05	2500000	True	7	True
IndivQLearningSlugsTerminateOnCollision/218_21_8	slugs_centralized	shields/general_shield	True	-10		False	GridWorld	SUNY	FullObsDiscrete	Individual_Q	1.0	0.05	2500000	True	8	True
IndivQLearningSlugsTerminateOnCollision/219_21_9	slugs_centralized	shields/general_shield	True	-10		False	GridWorld	SUNY	FullObsDiscrete	Individual_Q	1.0	0.05	2500000	True	9	True
IndivQLearningSlugsTerminateOnCollision/220_22_0	slugs_decentralized	shields/general_shield	True	-10	False	False	GridWorld	SUNY	FullObsDiscrete	Individual_Q	1.0	0.05	2500000	True	0	True
IndivQLearningSlugsTerminateOnCollision/221_22_1	slugs_decentralized	shields/general_shield	True	-10	False	False	GridWorld	SUNY	FullObsDiscrete	Individual_Q	1.0	0.05	2500000	True	1	True
IndivQLearningSlugsTerminateOnCollision/222_22_2	slugs_decentralized	shields/general_shield	True	-10	False	False	GridWorld	SUNY	FullObsDiscrete	Individual_Q	1.0	0.05	2500000	True	2	True
IndivQLearningSlugsTerminateOnCollision/223_22_3	slugs_decentralized	shields/general_shield	True	-10	False	False	GridWorld	SUNY	FullObsDiscrete	Individual_Q	1.0	0.05	2500000	True	3	True
IndivQLearningSlugsTerminateOnCollision/224_22_4	slugs_decentralized	shields/general_shield	True	-10	False	False	GridWorld	SUNY	FullObsDiscrete	Individual_Q	1.0	0.05	2500000	True	4	True
IndivQLearningSlugsTerminateOnCollision/225_22_5	slugs_decentralized	shields/general_shield	True	-10	False	False	GridWorld	SUNY	FullObsDiscrete	Individual_Q	1.0	0.05	2500000	True	5	True
IndivQLearningSlugsTerminateOnCollision/226_22_6	slugs_decentralized	shields/general_shield	True	-10	False	False	GridWorld	SUNY	FullObsDiscrete	Individual_Q	1.0	0.05	2500000	True	6	True
IndivQLearningSlugsTerminateOnCollision/227_22_7	slugs_decentralized	shields/general_shield	True	-10	False	False	GridWorld	SUNY	FullObsDiscrete	Individual_Q	1.0	0.05	2500000	True	7	True
IndivQLearningSlugsTerminateOnCollision/228_22_8	slugs_decentralized	shields/general_shield	True	-10	False	False	GridWorld	SUNY	FullObsDiscrete	Individual_Q	1.0	0.05	2500000	True	8	True
IndivQLearningSlugsTerminateOnCollision/229_22_9	slugs_decentralized	shields/general_shield	True	-10	False	False	GridWorld	SUNY	FullObsDiscrete	Individual_Q	1.0	0.05	2500000	True	9	True
IndivQLearningSlugsTerminateOnCollision/230_23_0	none		True	-10		False	GridWorld	SUNY	FullObsDiscrete	Individual_Q	1.0	0.05	2500000	True	0	True
IndivQLearningSlugsTerminateOnCollision/231_23_1	none		True	-10		False	GridWorld	SUNY	FullObsDiscrete	Individual_Q	1.0	0.05	2500000	True	1	True
IndivQLearningSlugsTerminateOnCollision/232_23_2	none		True	-10		False	GridWorld	SUNY	FullObsDiscrete	Individual_Q	1.0	0.05	2500000	True	2	True
IndivQLearningSlugsTerminateOnCollision/233_23_3	none		True	-10		False	GridWorld	SUNY	FullObsDiscrete	Individual_Q	1.0	0.05	2500000	True	3	True
IndivQLearningSlugsTerminateOnCollision/234_23_4	none		True	-10		False	GridWorld	SUNY	FullObsDiscrete	Individual_Q	1.0	0.05	2500000	True	4	True
IndivQLearningSlugsTerminateOnCollision/235_23_5	none		True	-10		False	GridWorld	SUNY	FullObsDiscrete	Individual_Q	1.0	0.05	2500000	True	5	True
IndivQLearningSlugsTerminateOnCollision/236_23_6	none		True	-10		False	GridWorld	SUNY	FullObsDiscrete	Individual_Q	1.0	0.05	2500000	True	6	True
IndivQLearningSlugsTerminateOnCollision/237_23_7	none		True	-10		False	GridWorld	SUNY	FullObsDiscrete	Individual_Q	1.0	0.05	2500000	True	7	True
IndivQLearningSlugsTerminateOnCollision/238_23_8	none		True	-10		False	GridWorld	SUNY	FullObsDiscrete	Individual_Q	1.0	0.05	2500000	True	8	True
IndivQLearningSlugsTerminateOnCollision/239_23_9	none		True	-10		False	GridWorld	SUNY	FullObsDiscrete	Individual_Q	1.0	0.05	2500000	True	9	True
