# Supplementary material
Source: ML conference proceedings conference paper supplement (https://proceedings.neurips.cc/paper_files/paper/2022/hash/57444e14ecd9e2c8f603b4f012ce3811-Abstract.html)
Supplement: Supplementary file 1 [file 57444e14ecd9e2c8f603b4f012ce3811-Supplemental-Conference.zip › 3410_shield_decentralization_for_sa-Supplementary Material/parallel_configs/IndivQLearningSlugsTrain.csv]

run_name	shield	shield_specification	punish_unsafe_orig_action	punish_unsafe_orig_action_modifier	randomize_starts	map_type	grid_world_map_name	grid_world_obs_type	learner_type	learner_anneal_eps_start	learner_anneal_eps_finish	max_total_steps	seed	skip_evaluation
IndivQLearningSlugs/0_0_0	slugs_centralized	shields/general_shield	True	-10	True	GridWorld	Pentagon	FullObsDiscrete	Individual_Q	1.0	0.05	2500000	0	True
IndivQLearningSlugs/1_0_1	slugs_centralized	shields/general_shield	True	-10	True	GridWorld	Pentagon	FullObsDiscrete	Individual_Q	1.0	0.05	2500000	1	True
IndivQLearningSlugs/2_0_2	slugs_centralized	shields/general_shield	True	-10	True	GridWorld	Pentagon	FullObsDiscrete	Individual_Q	1.0	0.05	2500000	2	True
IndivQLearningSlugs/3_0_3	slugs_centralized	shields/general_shield	True	-10	True	GridWorld	Pentagon	FullObsDiscrete	Individual_Q	1.0	0.05	2500000	3	True
IndivQLearningSlugs/4_0_4	slugs_centralized	shields/general_shield	True	-10	True	GridWorld	Pentagon	FullObsDiscrete	Individual_Q	1.0	0.05	2500000	4	True
IndivQLearningSlugs/5_0_5	slugs_centralized	shields/general_shield	True	-10	True	GridWorld	Pentagon	FullObsDiscrete	Individual_Q	1.0	0.05	2500000	5	True
IndivQLearningSlugs/6_0_6	slugs_centralized	shields/general_shield	True	-10	True	GridWorld	Pentagon	FullObsDiscrete	Individual_Q	1.0	0.05	2500000	6	True
IndivQLearningSlugs/7_0_7	slugs_centralized	shields/general_shield	True	-10	True	GridWorld	Pentagon	FullObsDiscrete	Individual_Q	1.0	0.05	2500000	7	True
IndivQLearningSlugs/8_0_8	slugs_centralized	shields/general_shield	True	-10	True	GridWorld	Pentagon	FullObsDiscrete	Individual_Q	1.0	0.05	2500000	8	True
IndivQLearningSlugs/9_0_9	slugs_centralized	shields/general_shield	True	-10	True	GridWorld	Pentagon	FullObsDiscrete	Individual_Q	1.0	0.05	2500000	9	True
IndivQLearningSlugs/10_1_0	slugs_decentralized	shields/general_shield	True	-10	True	GridWorld	Pentagon	FullObsDiscrete	Individual_Q	1.0	0.05	2500000	0	True
IndivQLearningSlugs/11_1_1	slugs_decentralized	shields/general_shield	True	-10	True	GridWorld	Pentagon	FullObsDiscrete	Individual_Q	1.0	0.05	2500000	1	True
IndivQLearningSlugs/12_1_2	slugs_decentralized	shields/general_shield	True	-10	True	GridWorld	Pentagon	FullObsDiscrete	Individual_Q	1.0	0.05	2500000	2	True
IndivQLearningSlugs/13_1_3	slugs_decentralized	shields/general_shield	True	-10	True	GridWorld	Pentagon	FullObsDiscrete	Individual_Q	1.0	0.05	2500000	3	True
IndivQLearningSlugs/14_1_4	slugs_decentralized	shields/general_shield	True	-10	True	GridWorld	Pentagon	FullObsDiscrete	Individual_Q	1.0	0.05	2500000	4	True
IndivQLearningSlugs/15_1_5	slugs_decentralized	shields/general_shield	True	-10	True	GridWorld	Pentagon	FullObsDiscrete	Individual_Q	1.0	0.05	2500000	5	True
IndivQLearningSlugs/16_1_6	slugs_decentralized	shields/general_shield	True	-10	True	GridWorld	Pentagon	FullObsDiscrete	Individual_Q	1.0	0.05	2500000	6	True
IndivQLearningSlugs/17_1_7	slugs_decentralized	shields/general_shield	True	-10	True	GridWorld	Pentagon	FullObsDiscrete	Individual_Q	1.0	0.05	2500000	7	True
IndivQLearningSlugs/18_1_8	slugs_decentralized	shields/general_shield	True	-10	True	GridWorld	Pentagon	FullObsDiscrete	Individual_Q	1.0	0.05	2500000	8	True
IndivQLearningSlugs/19_1_9	slugs_decentralized	shields/general_shield	True	-10	True	GridWorld	Pentagon	FullObsDiscrete	Individual_Q	1.0	0.05	2500000	9	True
IndivQLearningSlugs/20_2_0	none		True	-10	True	GridWorld	Pentagon	FullObsDiscrete	Individual_Q	1.0	0.05	2500000	0	True
IndivQLearningSlugs/21_2_1	none		True	-10	True	GridWorld	Pentagon	FullObsDiscrete	Individual_Q	1.0	0.05	2500000	1	True
IndivQLearningSlugs/22_2_2	none		True	-10	True	GridWorld	Pentagon	FullObsDiscrete	Individual_Q	1.0	0.05	2500000	2	True
IndivQLearningSlugs/23_2_3	none		True	-10	True	GridWorld	Pentagon	FullObsDiscrete	Individual_Q	1.0	0.05	2500000	3	True
IndivQLearningSlugs/24_2_4	none		True	-10	True	GridWorld	Pentagon	FullObsDiscrete	Individual_Q	1.0	0.05	2500000	4	True
IndivQLearningSlugs/25_2_5	none		True	-10	True	GridWorld	Pentagon	FullObsDiscrete	Individual_Q	1.0	0.05	2500000	5	True
IndivQLearningSlugs/26_2_6	none		True	-10	True	GridWorld	Pentagon	FullObsDiscrete	Individual_Q	1.0	0.05	2500000	6	True
IndivQLearningSlugs/27_2_7	none		True	-10	True	GridWorld	Pentagon	FullObsDiscrete	Individual_Q	1.0	0.05	2500000	7	True
IndivQLearningSlugs/28_2_8	none		True	-10	True	GridWorld	Pentagon	FullObsDiscrete	Individual_Q	1.0	0.05	2500000	8	True
IndivQLearningSlugs/29_2_9	none		True	-10	True	GridWorld	Pentagon	FullObsDiscrete	Individual_Q	1.0	0.05	2500000	9	True
IndivQLearningSlugs/30_3_0	slugs_centralized	shields/general_shield	True	-10	False	GridWorld	Pentagon	FullObsDiscrete	Individual_Q	1.0	0.05	2500000	0	True
IndivQLearningSlugs/31_3_1	slugs_centralized	shields/general_shield	True	-10	False	GridWorld	Pentagon	FullObsDiscrete	Individual_Q	1.0	0.05	2500000	1	True
IndivQLearningSlugs/32_3_2	slugs_centralized	shields/general_shield	True	-10	False	GridWorld	Pentagon	FullObsDiscrete	Individual_Q	1.0	0.05	2500000	2	True
IndivQLearningSlugs/33_3_3	slugs_centralized	shields/general_shield	True	-10	False	GridWorld	Pentagon	FullObsDiscrete	Individual_Q	1.0	0.05	2500000	3	True
IndivQLearningSlugs/34_3_4	slugs_centralized	shields/general_shield	True	-10	False	GridWorld	Pentagon	FullObsDiscrete	Individual_Q	1.0	0.05	2500000	4	True
IndivQLearningSlugs/35_3_5	slugs_centralized	shields/general_shield	True	-10	False	GridWorld	Pentagon	FullObsDiscrete	Individual_Q	1.0	0.05	2500000	5	True
IndivQLearningSlugs/36_3_6	slugs_centralized	shields/general_shield	True	-10	False	GridWorld	Pentagon	FullObsDiscrete	Individual_Q	1.0	0.05	2500000	6	True
IndivQLearningSlugs/37_3_7	slugs_centralized	shields/general_shield	True	-10	False	GridWorld	Pentagon	FullObsDiscrete	Individual_Q	1.0	0.05	2500000	7	True
IndivQLearningSlugs/38_3_8	slugs_centralized	shields/general_shield	True	-10	False	GridWorld	Pentagon	FullObsDiscrete	Individual_Q	1.0	0.05	2500000	8	True
IndivQLearningSlugs/39_3_9	slugs_centralized	shields/general_shield	True	-10	False	GridWorld	Pentagon	FullObsDiscrete	Individual_Q	1.0	0.05	2500000	9	True
IndivQLearningSlugs/40_4_0	slugs_decentralized	shields/general_shield	True	-10	False	GridWorld	Pentagon	FullObsDiscrete	Individual_Q	1.0	0.05	2500000	0	True
IndivQLearningSlugs/41_4_1	slugs_decentralized	shields/general_shield	True	-10	False	GridWorld	Pentagon	FullObsDiscrete	Individual_Q	1.0	0.05	2500000	1	True
IndivQLearningSlugs/42_4_2	slugs_decentralized	shields/general_shield	True	-10	False	GridWorld	Pentagon	FullObsDiscrete	Individual_Q	1.0	0.05	2500000	2	True
IndivQLearningSlugs/43_4_3	slugs_decentralized	shields/general_shield	True	-10	False	GridWorld	Pentagon	FullObsDiscrete	Individual_Q	1.0	0.05	2500000	3	True
IndivQLearningSlugs/44_4_4	slugs_decentralized	shields/general_shield	True	-10	False	GridWorld	Pentagon	FullObsDiscrete	Individual_Q	1.0	0.05	2500000	4	True
IndivQLearningSlugs/45_4_5	slugs_decentralized	shields/general_shield	True	-10	False	GridWorld	Pentagon	FullObsDiscrete	Individual_Q	1.0	0.05	2500000	5	True
IndivQLearningSlugs/46_4_6	slugs_decentralized	shields/general_shield	True	-10	False	GridWorld	Pentagon	FullObsDiscrete	Individual_Q	1.0	0.05	2500000	6	True
IndivQLearningSlugs/47_4_7	slugs_decentralized	shields/general_shield	True	-10	False	GridWorld	Pentagon	FullObsDiscrete	Individual_Q	1.0	0.05	2500000	7	True
IndivQLearningSlugs/48_4_8	slugs_decentralized	shields/general_shield	True	-10	False	GridWorld	Pentagon	FullObsDiscrete	Individual_Q	1.0	0.05	2500000	8	True
IndivQLearningSlugs/49_4_9	slugs_decentralized	shields/general_shield	True	-10	False	GridWorld	Pentagon	FullObsDiscrete	Individual_Q	1.0	0.05	2500000	9	True
IndivQLearningSlugs/50_5_0	none		True	-10	False	GridWorld	Pentagon	FullObsDiscrete	Individual_Q	1.0	0.05	2500000	0	True
IndivQLearningSlugs/51_5_1	none		True	-10	False	GridWorld	Pentagon	FullObsDiscrete	Individual_Q	1.0	0.05	2500000	1	True
IndivQLearningSlugs/52_5_2	none		True	-10	False	GridWorld	Pentagon	FullObsDiscrete	Individual_Q	1.0	0.05	2500000	2	True
IndivQLearningSlugs/53_5_3	none		True	-10	False	GridWorld	Pentagon	FullObsDiscrete	Individual_Q	1.0	0.05	2500000	3	True
IndivQLearningSlugs/54_5_4	none		True	-10	False	GridWorld	Pentagon	FullObsDiscrete	Individual_Q	1.0	0.05	2500000	4	True
IndivQLearningSlugs/55_5_5	none		True	-10	False	GridWorld	Pentagon	FullObsDiscrete	Individual_Q	1.0	0.05	2500000	5	True
IndivQLearningSlugs/56_5_6	none		True	-10	False	GridWorld	Pentagon	FullObsDiscrete	Individual_Q	1.0	0.05	2500000	6	True
IndivQLearningSlugs/57_5_7	none		True	-10	False	GridWorld	Pentagon	FullObsDiscrete	Individual_Q	1.0	0.05	2500000	7	True
IndivQLearningSlugs/58_5_8	none		True	-10	False	GridWorld	Pentagon	FullObsDiscrete	Individual_Q	1.0	0.05	2500000	8	True
IndivQLearningSlugs/59_5_9	none		True	-10	False	GridWorld	Pentagon	FullObsDiscrete	Individual_Q	1.0	0.05	2500000	9	True
IndivQLearningSlugs/60_6_0	slugs_centralized	shields/general_shield	True	-10	True	GridWorld	ISR	FullObsDiscrete	Individual_Q	1.0	0.05	2500000	0	True
IndivQLearningSlugs/61_6_1	slugs_centralized	shields/general_shield	True	-10	True	GridWorld	ISR	FullObsDiscrete	Individual_Q	1.0	0.05	2500000	1	True
IndivQLearningSlugs/62_6_2	slugs_centralized	shields/general_shield	True	-10	True	GridWorld	ISR	FullObsDiscrete	Individual_Q	1.0	0.05	2500000	2	True
IndivQLearningSlugs/63_6_3	slugs_centralized	shields/general_shield	True	-10	True	GridWorld	ISR	FullObsDiscrete	Individual_Q	1.0	0.05	2500000	3	True
IndivQLearningSlugs/64_6_4	slugs_centralized	shields/general_shield	True	-10	True	GridWorld	ISR	FullObsDiscrete	Individual_Q	1.0	0.05	2500000	4	True
IndivQLearningSlugs/65_6_5	slugs_centralized	shields/general_shield	True	-10	True	GridWorld	ISR	FullObsDiscrete	Individual_Q	1.0	0.05	2500000	5	True
IndivQLearningSlugs/66_6_6	slugs_centralized	shields/general_shield	True	-10	True	GridWorld	ISR	FullObsDiscrete	Individual_Q	1.0	0.05	2500000	6	True
IndivQLearningSlugs/67_6_7	slugs_centralized	shields/general_shield	True	-10	True	GridWorld	ISR	FullObsDiscrete	Individual_Q	1.0	0.05	2500000	7	True
IndivQLearningSlugs/68_6_8	slugs_centralized	shields/general_shield	True	-10	True	GridWorld	ISR	FullObsDiscrete	Individual_Q	1.0	0.05	2500000	8	True
IndivQLearningSlugs/69_6_9	slugs_centralized	shields/general_shield	True	-10	True	GridWorld	ISR	FullObsDiscrete	Individual_Q	1.0	0.05	2500000	9	True
IndivQLearningSlugs/70_7_0	slugs_decentralized	shields/general_shield	True	-10	True	GridWorld	ISR	FullObsDiscrete	Individual_Q	1.0	0.05	2500000	0	True
IndivQLearningSlugs/71_7_1	slugs_decentralized	shields/general_shield	True	-10	True	GridWorld	ISR	FullObsDiscrete	Individual_Q	1.0	0.05	2500000	1	True
IndivQLearningSlugs/72_7_2	slugs_decentralized	shields/general_shield	True	-10	True	GridWorld	ISR	FullObsDiscrete	Individual_Q	1.0	0.05	2500000	2	True
IndivQLearningSlugs/73_7_3	slugs_decentralized	shields/general_shield	True	-10	True	GridWorld	ISR	FullObsDiscrete	Individual_Q	1.0	0.05	2500000	3	True
IndivQLearningSlugs/74_7_4	slugs_decentralized	shields/general_shield	True	-10	True	GridWorld	ISR	FullObsDiscrete	Individual_Q	1.0	0.05	2500000	4	True
IndivQLearningSlugs/75_7_5	slugs_decentralized	shields/general_shield	True	-10	True	GridWorld	ISR	FullObsDiscrete	Individual_Q	1.0	0.05	2500000	5	True
IndivQLearningSlugs/76_7_6	slugs_decentralized	shields/general_shield	True	-10	True	GridWorld	ISR	FullObsDiscrete	Individual_Q	1.0	0.05	2500000	6	True
IndivQLearningSlugs/77_7_7	slugs_decentralized	shields/general_shield	True	-10	True	GridWorld	ISR	FullObsDiscrete	Individual_Q	1.0	0.05	2500000	7	True
IndivQLearningSlugs/78_7_8	slugs_decentralized	shields/general_shield	True	-10	True	GridWorld	ISR	FullObsDiscrete	Individual_Q	1.0	0.05	2500000	8	True
IndivQLearningSlugs/79_7_9	slugs_decentralized	shields/general_shield	True	-10	True	GridWorld	ISR	FullObsDiscrete	Individual_Q	1.0	0.05	2500000	9	True
IndivQLearningSlugs/80_8_0	none		True	-10	True	GridWorld	ISR	FullObsDiscrete	Individual_Q	1.0	0.05	2500000	0	True
IndivQLearningSlugs/81_8_1	none		True	-10	True	GridWorld	ISR	FullObsDiscrete	Individual_Q	1.0	0.05	2500000	1	True
IndivQLearningSlugs/82_8_2	none		True	-10	True	GridWorld	ISR	FullObsDiscrete	Individual_Q	1.0	0.05	2500000	2	True
IndivQLearningSlugs/83_8_3	none		True	-10	True	GridWorld	ISR	FullObsDiscrete	Individual_Q	1.0	0.05	2500000	3	True
IndivQLearningSlugs/84_8_4	none		True	-10	True	GridWorld	ISR	FullObsDiscrete	Individual_Q	1.0	0.05	2500000	4	True
IndivQLearningSlugs/85_8_5	none		True	-10	True	GridWorld	ISR	FullObsDiscrete	Individual_Q	1.0	0.05	2500000	5	True
IndivQLearningSlugs/86_8_6	none		True	-10	True	GridWorld	ISR	FullObsDiscrete	Individual_Q	1.0	0.05	2500000	6	True
IndivQLearningSlugs/87_8_7	none		True	-10	True	GridWorld	ISR	FullObsDiscrete	Individual_Q	1.0	0.05	2500000	7	True
IndivQLearningSlugs/88_8_8	none		True	-10	True	GridWorld	ISR	FullObsDiscrete	Individual_Q	1.0	0.05	2500000	8	True
IndivQLearningSlugs/89_8_9	none		True	-10	True	GridWorld	ISR	FullObsDiscrete	Individual_Q	1.0	0.05	2500000	9	True
IndivQLearningSlugs/90_9_0	slugs_centralized	shields/general_shield	True	-10	False	GridWorld	ISR	FullObsDiscrete	Individual_Q	1.0	0.05	2500000	0	True
IndivQLearningSlugs/91_9_1	slugs_centralized	shields/general_shield	True	-10	False	GridWorld	ISR	FullObsDiscrete	Individual_Q	1.0	0.05	2500000	1	True
IndivQLearningSlugs/92_9_2	slugs_centralized	shields/general_shield	True	-10	False	GridWorld	ISR	FullObsDiscrete	Individual_Q	1.0	0.05	2500000	2	True
IndivQLearningSlugs/93_9_3	slugs_centralized	shields/general_shield	True	-10	False	GridWorld	ISR	FullObsDiscrete	Individual_Q	1.0	0.05	2500000	3	True
IndivQLearningSlugs/94_9_4	slugs_centralized	shields/general_shield	True	-10	False	GridWorld	ISR	FullObsDiscrete	Individual_Q	1.0	0.05	2500000	4	True
IndivQLearningSlugs/95_9_5	slugs_centralized	shields/general_shield	True	-10	False	GridWorld	ISR	FullObsDiscrete	Individual_Q	1.0	0.05	2500000	5	True
IndivQLearningSlugs/96_9_6	slugs_centralized	shields/general_shield	True	-10	False	GridWorld	ISR	FullObsDiscrete	Individual_Q	1.0	0.05	2500000	6	True
IndivQLearningSlugs/97_9_7	slugs_centralized	shields/general_shield	True	-10	False	GridWorld	ISR	FullObsDiscrete	Individual_Q	1.0	0.05	2500000	7	True
IndivQLearningSlugs/98_9_8	slugs_centralized	shields/general_shield	True	-10	False	GridWorld	ISR	FullObsDiscrete	Individual_Q	1.0	0.05	2500000	8	True
IndivQLearningSlugs/99_9_9	slugs_centralized	shields/general_shield	True	-10	False	GridWorld	ISR	FullObsDiscrete	Individual_Q	1.0	0.05	2500000	9	True
IndivQLearningSlugs/100_10_0	slugs_decentralized	shields/general_shield	True	-10	False	GridWorld	ISR	FullObsDiscrete	Individual_Q	1.0	0.05	2500000	0	True
IndivQLearningSlugs/101_10_1	slugs_decentralized	shields/general_shield	True	-10	False	GridWorld	ISR	FullObsDiscrete	Individual_Q	1.0	0.05	2500000	1	True
IndivQLearningSlugs/102_10_2	slugs_decentralized	shields/general_shield	True	-10	False	GridWorld	ISR	FullObsDiscrete	Individual_Q	1.0	0.05	2500000	2	True
IndivQLearningSlugs/103_10_3	slugs_decentralized	shields/general_shield	True	-10	False	GridWorld	ISR	FullObsDiscrete	Individual_Q	1.0	0.05	2500000	3	True
IndivQLearningSlugs/104_10_4	slugs_decentralized	shields/general_shield	True	-10	False	GridWorld	ISR	FullObsDiscrete	Individual_Q	1.0	0.05	2500000	4	True
IndivQLearningSlugs/105_10_5	slugs_decentralized	shields/general_shield	True	-10	False	GridWorld	ISR	FullObsDiscrete	Individual_Q	1.0	0.05	2500000	5	True
IndivQLearningSlugs/106_10_6	slugs_decentralized	shields/general_shield	True	-10	False	GridWorld	ISR	FullObsDiscrete	Individual_Q	1.0	0.05	2500000	6	True
IndivQLearningSlugs/107_10_7	slugs_decentralized	shields/general_shield	True	-10	False	GridWorld	ISR	FullObsDiscrete	Individual_Q	1.0	0.05	2500000	7	True
IndivQLearningSlugs/108_10_8	slugs_decentralized	shields/general_shield	True	-10	False	GridWorld	ISR	FullObsDiscrete	Individual_Q	1.0	0.05	2500000	8	True
IndivQLearningSlugs/109_10_9	slugs_decentralized	shields/general_shield	True	-10	False	GridWorld	ISR	FullObsDiscrete	Individual_Q	1.0	0.05	2500000	9	True
IndivQLearningSlugs/110_11_0	none		True	-10	False	GridWorld	ISR	FullObsDiscrete	Individual_Q	1.0	0.05	2500000	0	True
IndivQLearningSlugs/111_11_1	none		True	-10	False	GridWorld	ISR	FullObsDiscrete	Individual_Q	1.0	0.05	2500000	1	True
IndivQLearningSlugs/112_11_2	none		True	-10	False	GridWorld	ISR	FullObsDiscrete	Individual_Q	1.0	0.05	2500000	2	True
IndivQLearningSlugs/113_11_3	none		True	-10	False	GridWorld	ISR	FullObsDiscrete	Individual_Q	1.0	0.05	2500000	3	True
IndivQLearningSlugs/114_11_4	none		True	-10	False	GridWorld	ISR	FullObsDiscrete	Individual_Q	1.0	0.05	2500000	4	True
IndivQLearningSlugs/115_11_5	none		True	-10	False	GridWorld	ISR	FullObsDiscrete	Individual_Q	1.0	0.05	2500000	5	True
IndivQLearningSlugs/116_11_6	none		True	-10	False	GridWorld	ISR	FullObsDiscrete	Individual_Q	1.0	0.05	2500000	6	True
IndivQLearningSlugs/117_11_7	none		True	-10	False	GridWorld	ISR	FullObsDiscrete	Individual_Q	1.0	0.05	2500000	7	True
IndivQLearningSlugs/118_11_8	none		True	-10	False	GridWorld	ISR	FullObsDiscrete	Individual_Q	1.0	0.05	2500000	8	True
IndivQLearningSlugs/119_11_9	none		True	-10	False	GridWorld	ISR	FullObsDiscrete	Individual_Q	1.0	0.05	2500000	9	True
IndivQLearningSlugs/120_12_0	slugs_centralized	shields/general_shield	True	-10	True	GridWorld	MIT	FullObsDiscrete	Individual_Q	1.0	0.05	2500000	0	True
IndivQLearningSlugs/121_12_1	slugs_centralized	shields/general_shield	True	-10	True	GridWorld	MIT	FullObsDiscrete	Individual_Q	1.0	0.05	2500000	1	True
IndivQLearningSlugs/122_12_2	slugs_centralized	shields/general_shield	True	-10	True	GridWorld	MIT	FullObsDiscrete	Individual_Q	1.0	0.05	2500000	2	True
IndivQLearningSlugs/123_12_3	slugs_centralized	shields/general_shield	True	-10	True	GridWorld	MIT	FullObsDiscrete	Individual_Q	1.0	0.05	2500000	3	True
IndivQLearningSlugs/124_12_4	slugs_centralized	shields/general_shield	True	-10	True	GridWorld	MIT	FullObsDiscrete	Individual_Q	1.0	0.05	2500000	4	True
IndivQLearningSlugs/125_12_5	slugs_centralized	shields/general_shield	True	-10	True	GridWorld	MIT	FullObsDiscrete	Individual_Q	1.0	0.05	2500000	5	True
IndivQLearningSlugs/126_12_6	slugs_centralized	shields/general_shield	True	-10	True	GridWorld	MIT	FullObsDiscrete	Individual_Q	1.0	0.05	2500000	6	True
IndivQLearningSlugs/127_12_7	slugs_centralized	shields/general_shield	True	-10	True	GridWorld	MIT	FullObsDiscrete	Individual_Q	1.0	0.05	2500000	7	True
IndivQLearningSlugs/128_12_8	slugs_centralized	shields/general_shield	True	-10	True	GridWorld	MIT	FullObsDiscrete	Individual_Q	1.0	0.05	2500000	8	True
IndivQLearningSlugs/129_12_9	slugs_centralized	shields/general_shield	True	-10	True	GridWorld	MIT	FullObsDiscrete	Individual_Q	1.0	0.05	2500000	9	True
IndivQLearningSlugs/130_13_0	slugs_decentralized	shields/general_shield	True	-10	True	GridWorld	MIT	FullObsDiscrete	Individual_Q	1.0	0.05	2500000	0	True
IndivQLearningSlugs/131_13_1	slugs_decentralized	shields/general_shield	True	-10	True	GridWorld	MIT	FullObsDiscrete	Individual_Q	1.0	0.05	2500000	1	True
IndivQLearningSlugs/132_13_2	slugs_decentralized	shields/general_shield	True	-10	True	GridWorld	MIT	FullObsDiscrete	Individual_Q	1.0	0.05	2500000	2	True
IndivQLearningSlugs/133_13_3	slugs_decentralized	shields/general_shield	True	-10	True	GridWorld	MIT	FullObsDiscrete	Individual_Q	1.0	0.05	2500000	3	True
IndivQLearningSlugs/134_13_4	slugs_decentralized	shields/general_shield	True	-10	True	GridWorld	MIT	FullObsDiscrete	Individual_Q	1.0	0.05	2500000	4	True
IndivQLearningSlugs/135_13_5	slugs_decentralized	shields/general_shield	True	-10	True	GridWorld	MIT	FullObsDiscrete	Individual_Q	1.0	0.05	2500000	5	True
IndivQLearningSlugs/136_13_6	slugs_decentralized	shields/general_shield	True	-10	True	GridWorld	MIT	FullObsDiscrete	Individual_Q	1.0	0.05	2500000	6	True
IndivQLearningSlugs/137_13_7	slugs_decentralized	shields/general_shield	True	-10	True	GridWorld	MIT	FullObsDiscrete	Individual_Q	1.0	0.05	2500000	7	True
IndivQLearningSlugs/138_13_8	slugs_decentralized	shields/general_shield	True	-10	True	GridWorld	MIT	FullObsDiscrete	Individual_Q	1.0	0.05	2500000	8	True
IndivQLearningSlugs/139_13_9	slugs_decentralized	shields/general_shield	True	-10	True	GridWorld	MIT	FullObsDiscrete	Individual_Q	1.0	0.05	2500000	9	True
IndivQLearningSlugs/140_14_0	none		True	-10	True	GridWorld	MIT	FullObsDiscrete	Individual_Q	1.0	0.05	2500000	0	True
IndivQLearningSlugs/141_14_1	none		True	-10	True	GridWorld	MIT	FullObsDiscrete	Individual_Q	1.0	0.05	2500000	1	True
IndivQLearningSlugs/142_14_2	none		True	-10	True	GridWorld	MIT	FullObsDiscrete	Individual_Q	1.0	0.05	2500000	2	True
IndivQLearningSlugs/143_14_3	none		True	-10	True	GridWorld	MIT	FullObsDiscrete	Individual_Q	1.0	0.05	2500000	3	True
IndivQLearningSlugs/144_14_4	none		True	-10	True	GridWorld	MIT	FullObsDiscrete	Individual_Q	1.0	0.05	2500000	4	True
IndivQLearningSlugs/145_14_5	none		True	-10	True	GridWorld	MIT	FullObsDiscrete	Individual_Q	1.0	0.05	2500000	5	True
IndivQLearningSlugs/146_14_6	none		True	-10	True	GridWorld	MIT	FullObsDiscrete	Individual_Q	1.0	0.05	2500000	6	True
IndivQLearningSlugs/147_14_7	none		True	-10	True	GridWorld	MIT	FullObsDiscrete	Individual_Q	1.0	0.05	2500000	7	True
IndivQLearningSlugs/148_14_8	none		True	-10	True	GridWorld	MIT	FullObsDiscrete	Individual_Q	1.0	0.05	2500000	8	True
IndivQLearningSlugs/149_14_9	none		True	-10	True	GridWorld	MIT	FullObsDiscrete	Individual_Q	1.0	0.05	2500000	9	True
IndivQLearningSlugs/150_15_0	slugs_centralized	shields/general_shield	True	-10	False	GridWorld	MIT	FullObsDiscrete	Individual_Q	1.0	0.05	2500000	0	True
IndivQLearningSlugs/151_15_1	slugs_centralized	shields/general_shield	True	-10	False	GridWorld	MIT	FullObsDiscrete	Individual_Q	1.0	0.05	2500000	1	True
IndivQLearningSlugs/152_15_2	slugs_centralized	shields/general_shield	True	-10	False	GridWorld	MIT	FullObsDiscrete	Individual_Q	1.0	0.05	2500000	2	True
IndivQLearningSlugs/153_15_3	slugs_centralized	shields/general_shield	True	-10	False	GridWorld	MIT	FullObsDiscrete	Individual_Q	1.0	0.05	2500000	3	True
IndivQLearningSlugs/154_15_4	slugs_centralized	shields/general_shield	True	-10	False	GridWorld	MIT	FullObsDiscrete	Individual_Q	1.0	0.05	2500000	4	True
IndivQLearningSlugs/155_15_5	slugs_centralized	shields/general_shield	True	-10	False	GridWorld	MIT	FullObsDiscrete	Individual_Q	1.0	0.05	2500000	5	True
IndivQLearningSlugs/156_15_6	slugs_centralized	shields/general_shield	True	-10	False	GridWorld	MIT	FullObsDiscrete	Individual_Q	1.0	0.05	2500000	6	True
IndivQLearningSlugs/157_15_7	slugs_centralized	shields/general_shield	True	-10	False	GridWorld	MIT	FullObsDiscrete	Individual_Q	1.0	0.05	2500000	7	True
IndivQLearningSlugs/158_15_8	slugs_centralized	shields/general_shield	True	-10	False	GridWorld	MIT	FullObsDiscrete	Individual_Q	1.0	0.05	2500000	8	True
IndivQLearningSlugs/159_15_9	slugs_centralized	shields/general_shield	True	-10	False	GridWorld	MIT	FullObsDiscrete	Individual_Q	1.0	0.05	2500000	9	True
IndivQLearningSlugs/160_16_0	slugs_decentralized	shields/general_shield	True	-10	False	GridWorld	MIT	FullObsDiscrete	Individual_Q	1.0	0.05	2500000	0	True
IndivQLearningSlugs/161_16_1	slugs_decentralized	shields/general_shield	True	-10	False	GridWorld	MIT	FullObsDiscrete	Individual_Q	1.0	0.05	2500000	1	True
IndivQLearningSlugs/162_16_2	slugs_decentralized	shields/general_shield	True	-10	False	GridWorld	MIT	FullObsDiscrete	Individual_Q	1.0	0.05	2500000	2	True
IndivQLearningSlugs/163_16_3	slugs_decentralized	shields/general_shield	True	-10	False	GridWorld	MIT	FullObsDiscrete	Individual_Q	1.0	0.05	2500000	3	True
IndivQLearningSlugs/164_16_4	slugs_decentralized	shields/general_shield	True	-10	False	GridWorld	MIT	FullObsDiscrete	Individual_Q	1.0	0.05	2500000	4	True
IndivQLearningSlugs/165_16_5	slugs_decentralized	shields/general_shield	True	-10	False	GridWorld	MIT	FullObsDiscrete	Individual_Q	1.0	0.05	2500000	5	True
IndivQLearningSlugs/166_16_6	slugs_decentralized	shields/general_shield	True	-10	False	GridWorld	MIT	FullObsDiscrete	Individual_Q	1.0	0.05	2500000	6	True
IndivQLearningSlugs/167_16_7	slugs_decentralized	shields/general_shield	True	-10	False	GridWorld	MIT	FullObsDiscrete	Individual_Q	1.0	0.05	2500000	7	True
IndivQLearningSlugs/168_16_8	slugs_decentralized	shields/general_shield	True	-10	False	GridWorld	MIT	FullObsDiscrete	Individual_Q	1.0	0.05	2500000	8	True
IndivQLearningSlugs/169_16_9	slugs_decentralized	shields/general_shield	True	-10	False	GridWorld	MIT	FullObsDiscrete	Individual_Q	1.0	0.05	2500000	9	True
IndivQLearningSlugs/170_17_0	none		True	-10	False	GridWorld	MIT	FullObsDiscrete	Individual_Q	1.0	0.05	2500000	0	True
IndivQLearningSlugs/171_17_1	none		True	-10	False	GridWorld	MIT	FullObsDiscrete	Individual_Q	1.0	0.05	2500000	1	True
IndivQLearningSlugs/172_17_2	none		True	-10	False	GridWorld	MIT	FullObsDiscrete	Individual_Q	1.0	0.05	2500000	2	True
IndivQLearningSlugs/173_17_3	none		True	-10	False	GridWorld	MIT	FullObsDiscrete	Individual_Q	1.0	0.05	2500000	3	True
IndivQLearningSlugs/174_17_4	none		True	-10	False	GridWorld	MIT	FullObsDiscrete	Individual_Q	1.0	0.05	2500000	4	True
IndivQLearningSlugs/175_17_5	none		True	-10	False	GridWorld	MIT	FullObsDiscrete	Individual_Q	1.0	0.05	2500000	5	True
IndivQLearningSlugs/176_17_6	none		True	-10	False	GridWorld	MIT	FullObsDiscrete	Individual_Q	1.0	0.05	2500000	6	True
IndivQLearningSlugs/177_17_7	none		True	-10	False	GridWorld	MIT	FullObsDiscrete	Individual_Q	1.0	0.05	2500000	7	True
IndivQLearningSlugs/178_17_8	none		True	-10	False	GridWorld	MIT	FullObsDiscrete	Individual_Q	1.0	0.05	2500000	8	True
IndivQLearningSlugs/179_17_9	none		True	-10	False	GridWorld	MIT	FullObsDiscrete	Individual_Q	1.0	0.05	2500000	9	True
IndivQLearningSlugs/180_18_0	slugs_centralized	shields/general_shield	True	-10	True	GridWorld	SUNY	FullObsDiscrete	Individual_Q	1.0	0.05	2500000	0	True
IndivQLearningSlugs/181_18_1	slugs_centralized	shields/general_shield	True	-10	True	GridWorld	SUNY	FullObsDiscrete	Individual_Q	1.0	0.05	2500000	1	True
IndivQLearningSlugs/182_18_2	slugs_centralized	shields/general_shield	True	-10	True	GridWorld	SUNY	FullObsDiscrete	Individual_Q	1.0	0.05	2500000	2	True
IndivQLearningSlugs/183_18_3	slugs_centralized	shields/general_shield	True	-10	True	GridWorld	SUNY	FullObsDiscrete	Individual_Q	1.0	0.05	2500000	3	True
IndivQLearningSlugs/184_18_4	slugs_centralized	shields/general_shield	True	-10	True	GridWorld	SUNY	FullObsDiscrete	Individual_Q	1.0	0.05	2500000	4	True
IndivQLearningSlugs/185_18_5	slugs_centralized	shields/general_shield	True	-10	True	GridWorld	SUNY	FullObsDiscrete	Individual_Q	1.0	0.05	2500000	5	True
IndivQLearningSlugs/186_18_6	slugs_centralized	shields/general_shield	True	-10	True	GridWorld	SUNY	FullObsDiscrete	Individual_Q	1.0	0.05	2500000	6	True
IndivQLearningSlugs/187_18_7	slugs_centralized	shields/general_shield	True	-10	True	GridWorld	SUNY	FullObsDiscrete	Individual_Q	1.0	0.05	2500000	7	True
IndivQLearningSlugs/188_18_8	slugs_centralized	shields/general_shield	True	-10	True	GridWorld	SUNY	FullObsDiscrete	Individual_Q	1.0	0.05	2500000	8	True
IndivQLearningSlugs/189_18_9	slugs_centralized	shields/general_shield	True	-10	True	GridWorld	SUNY	FullObsDiscrete	Individual_Q	1.0	0.05	2500000	9	True
IndivQLearningSlugs/190_19_0	slugs_decentralized	shields/general_shield	True	-10	True	GridWorld	SUNY	FullObsDiscrete	Individual_Q	1.0	0.05	2500000	0	True
IndivQLearningSlugs/191_19_1	slugs_decentralized	shields/general_shield	True	-10	True	GridWorld	SUNY	FullObsDiscrete	Individual_Q	1.0	0.05	2500000	1	True
IndivQLearningSlugs/192_19_2	slugs_decentralized	shields/general_shield	True	-10	True	GridWorld	SUNY	FullObsDiscrete	Individual_Q	1.0	0.05	2500000	2	True
IndivQLearningSlugs/193_19_3	slugs_decentralized	shields/general_shield	True	-10	True	GridWorld	SUNY	FullObsDiscrete	Individual_Q	1.0	0.05	2500000	3	True
IndivQLearningSlugs/194_19_4	slugs_decentralized	shields/general_shield	True	-10	True	GridWorld	SUNY	FullObsDiscrete	Individual_Q	1.0	0.05	2500000	4	True
IndivQLearningSlugs/195_19_5	slugs_decentralized	shields/general_shield	True	-10	True	GridWorld	SUNY	FullObsDiscrete	Individual_Q	1.0	0.05	2500000	5	True
IndivQLearningSlugs/196_19_6	slugs_decentralized	shields/general_shield	True	-10	True	GridWorld	SUNY	FullObsDiscrete	Individual_Q	1.0	0.05	2500000	6	True
IndivQLearningSlugs/197_19_7	slugs_decentralized	shields/general_shield	True	-10	True	GridWorld	SUNY	FullObsDiscrete	Individual_Q	1.0	0.05	2500000	7	True
IndivQLearningSlugs/198_19_8	slugs_decentralized	shields/general_shield	True	-10	True	GridWorld	SUNY	FullObsDiscrete	Individual_Q	1.0	0.05	2500000	8	True
IndivQLearningSlugs/199_19_9	slugs_decentralized	shields/general_shield	True	-10	True	GridWorld	SUNY	FullObsDiscrete	Individual_Q	1.0	0.05	2500000	9	True
IndivQLearningSlugs/200_20_0	none		True	-10	True	GridWorld	SUNY	FullObsDiscrete	Individual_Q	1.0	0.05	2500000	0	True
IndivQLearningSlugs/201_20_1	none		True	-10	True	GridWorld	SUNY	FullObsDiscrete	Individual_Q	1.0	0.05	2500000	1	True
IndivQLearningSlugs/202_20_2	none		True	-10	True	GridWorld	SUNY	FullObsDiscrete	Individual_Q	1.0	0.05	2500000	2	True
IndivQLearningSlugs/203_20_3	none		True	-10	True	GridWorld	SUNY	FullObsDiscrete	Individual_Q	1.0	0.05	2500000	3	True
IndivQLearningSlugs/204_20_4	none		True	-10	True	GridWorld	SUNY	FullObsDiscrete	Individual_Q	1.0	0.05	2500000	4	True
IndivQLearningSlugs/205_20_5	none		True	-10	True	GridWorld	SUNY	FullObsDiscrete	Individual_Q	1.0	0.05	2500000	5	True
IndivQLearningSlugs/206_20_6	none		True	-10	True	GridWorld	SUNY	FullObsDiscrete	Individual_Q	1.0	0.05	2500000	6	True
IndivQLearningSlugs/207_20_7	none		True	-10	True	GridWorld	SUNY	FullObsDiscrete	Individual_Q	1.0	0.05	2500000	7	True
IndivQLearningSlugs/208_20_8	none		True	-10	True	GridWorld	SUNY	FullObsDiscrete	Individual_Q	1.0	0.05	2500000	8	True
IndivQLearningSlugs/209_20_9	none		True	-10	True	GridWorld	SUNY	FullObsDiscrete	Individual_Q	1.0	0.05	2500000	9	True
IndivQLearningSlugs/210_21_0	slugs_centralized	shields/general_shield	True	-10	False	GridWorld	SUNY	FullObsDiscrete	Individual_Q	1.0	0.05	2500000	0	True
IndivQLearningSlugs/211_21_1	slugs_centralized	shields/general_shield	True	-10	False	GridWorld	SUNY	FullObsDiscrete	Individual_Q	1.0	0.05	2500000	1	True
IndivQLearningSlugs/212_21_2	slugs_centralized	shields/general_shield	True	-10	False	GridWorld	SUNY	FullObsDiscrete	Individual_Q	1.0	0.05	2500000	2	True
IndivQLearningSlugs/213_21_3	slugs_centralized	shields/general_shield	True	-10	False	GridWorld	SUNY	FullObsDiscrete	Individual_Q	1.0	0.05	2500000	3	True
IndivQLearningSlugs/214_21_4	slugs_centralized	shields/general_shield	True	-10	False	GridWorld	SUNY	FullObsDiscrete	Individual_Q	1.0	0.05	2500000	4	True
IndivQLearningSlugs/215_21_5	slugs_centralized	shields/general_shield	True	-10	False	GridWorld	SUNY	FullObsDiscrete	Individual_Q	1.0	0.05	2500000	5	True
IndivQLearningSlugs/216_21_6	slugs_centralized	shields/general_shield	True	-10	False	GridWorld	SUNY	FullObsDiscrete	Individual_Q	1.0	0.05	2500000	6	True
IndivQLearningSlugs/217_21_7	slugs_centralized	shields/general_shield	True	-10	False	GridWorld	SUNY	FullObsDiscrete	Individual_Q	1.0	0.05	2500000	7	True
IndivQLearningSlugs/218_21_8	slugs_centralized	shields/general_shield	True	-10	False	GridWorld	SUNY	FullObsDiscrete	Individual_Q	1.0	0.05	2500000	8	True
IndivQLearningSlugs/219_21_9	slugs_centralized	shields/general_shield	True	-10	False	GridWorld	SUNY	FullObsDiscrete	Individual_Q	1.0	0.05	2500000	9	True
IndivQLearningSlugs/220_22_0	slugs_decentralized	shields/general_shield	True	-10	False	GridWorld	SUNY	FullObsDiscrete	Individual_Q	1.0	0.05	2500000	0	True
IndivQLearningSlugs/221_22_1	slugs_decentralized	shields/general_shield	True	-10	False	GridWorld	SUNY	FullObsDiscrete	Individual_Q	1.0	0.05	2500000	1	True
IndivQLearningSlugs/222_22_2	slugs_decentralized	shields/general_shield	True	-10	False	GridWorld	SUNY	FullObsDiscrete	Individual_Q	1.0	0.05	2500000	2	True
IndivQLearningSlugs/223_22_3	slugs_decentralized	shields/general_shield	True	-10	False	GridWorld	SUNY	FullObsDiscrete	Individual_Q	1.0	0.05	2500000	3	True
IndivQLearningSlugs/224_22_4	slugs_decentralized	shields/general_shield	True	-10	False	GridWorld	SUNY	FullObsDiscrete	Individual_Q	1.0	0.05	2500000	4	True
IndivQLearningSlugs/225_22_5	slugs_decentralized	shields/general_shield	True	-10	False	GridWorld	SUNY	FullObsDiscrete	Individual_Q	1.0	0.05	2500000	5	True
IndivQLearningSlugs/226_22_6	slugs_decentralized	shields/general_shield	True	-10	False	GridWorld	SUNY	FullObsDiscrete	Individual_Q	1.0	0.05	2500000	6	True
IndivQLearningSlugs/227_22_7	slugs_decentralized	shields/general_shield	True	-10	False	GridWorld	SUNY	FullObsDiscrete	Individual_Q	1.0	0.05	2500000	7	True
IndivQLearningSlugs/228_22_8	slugs_decentralized	shields/general_shield	True	-10	False	GridWorld	SUNY	FullObsDiscrete	Individual_Q	1.0	0.05	2500000	8	True
IndivQLearningSlugs/229_22_9	slugs_decentralized	shields/general_shield	True	-10	False	GridWorld	SUNY	FullObsDiscrete	Individual_Q	1.0	0.05	2500000	9	True
IndivQLearningSlugs/230_23_0	none		True	-10	False	GridWorld	SUNY	FullObsDiscrete	Individual_Q	1.0	0.05	2500000	0	True
IndivQLearningSlugs/231_23_1	none		True	-10	False	GridWorld	SUNY	FullObsDiscrete	Individual_Q	1.0	0.05	2500000	1	True
IndivQLearningSlugs/232_23_2	none		True	-10	False	GridWorld	SUNY	FullObsDiscrete	Individual_Q	1.0	0.05	2500000	2	True
IndivQLearningSlugs/233_23_3	none		True	-10	False	GridWorld	SUNY	FullObsDiscrete	Individual_Q	1.0	0.05	2500000	3	True
IndivQLearningSlugs/234_23_4	none		True	-10	False	GridWorld	SUNY	FullObsDiscrete	Individual_Q	1.0	0.05	2500000	4	True
IndivQLearningSlugs/235_23_5	none		True	-10	False	GridWorld	SUNY	FullObsDiscrete	Individual_Q	1.0	0.05	2500000	5	True
IndivQLearningSlugs/236_23_6	none		True	-10	False	GridWorld	SUNY	FullObsDiscrete	Individual_Q	1.0	0.05	2500000	6	True
IndivQLearningSlugs/237_23_7	none		True	-10	False	GridWorld	SUNY	FullObsDiscrete	Individual_Q	1.0	0.05	2500000	7	True
IndivQLearningSlugs/238_23_8	none		True	-10	False	GridWorld	SUNY	FullObsDiscrete	Individual_Q	1.0	0.05	2500000	8	True
IndivQLearningSlugs/239_23_9	none		True	-10	False	GridWorld	SUNY	FullObsDiscrete	Individual_Q	1.0	0.05	2500000	9	True
