# Supplementary material
Source: ML conference proceedings conference paper supplement (https://proceedings.neurips.cc/paper_files/paper/2022/hash/57444e14ecd9e2c8f603b4f012ce3811-Abstract.html)
Supplement: Supplementary file 1 [file 57444e14ecd9e2c8f603b4f012ce3811-Supplemental-Conference.zip › 3410_shield_decentralization_for_sa-Supplementary Material/parallel_configs/IndivQLearningTabularAllButSUNY25Train.csv]

run_name	shield	punish_unsafe_orig_action	punish_unsafe_orig_action_modifier	randomize_starts	map_type	grid_world_map_name	grid_world_obs_type	learner_type	learner_anneal_eps_start	learner_anneal_eps_finish	max_total_steps	seed	skip_evaluation
IndivQLearningTabularAllButSUNY25/0_0_0	centralized	True	-10	True	GridWorld	Pentagon	FullObsDiscrete	Individual_Q	1.0	0.05	2500000	0	True
IndivQLearningTabularAllButSUNY25/1_0_1	centralized	True	-10	True	GridWorld	Pentagon	FullObsDiscrete	Individual_Q	1.0	0.05	2500000	1	True
IndivQLearningTabularAllButSUNY25/2_0_2	centralized	True	-10	True	GridWorld	Pentagon	FullObsDiscrete	Individual_Q	1.0	0.05	2500000	2	True
IndivQLearningTabularAllButSUNY25/3_0_3	centralized	True	-10	True	GridWorld	Pentagon	FullObsDiscrete	Individual_Q	1.0	0.05	2500000	3	True
IndivQLearningTabularAllButSUNY25/4_0_4	centralized	True	-10	True	GridWorld	Pentagon	FullObsDiscrete	Individual_Q	1.0	0.05	2500000	4	True
IndivQLearningTabularAllButSUNY25/5_0_5	centralized	True	-10	True	GridWorld	Pentagon	FullObsDiscrete	Individual_Q	1.0	0.05	2500000	5	True
IndivQLearningTabularAllButSUNY25/6_0_6	centralized	True	-10	True	GridWorld	Pentagon	FullObsDiscrete	Individual_Q	1.0	0.05	2500000	6	True
IndivQLearningTabularAllButSUNY25/7_0_7	centralized	True	-10	True	GridWorld	Pentagon	FullObsDiscrete	Individual_Q	1.0	0.05	2500000	7	True
IndivQLearningTabularAllButSUNY25/8_0_8	centralized	True	-10	True	GridWorld	Pentagon	FullObsDiscrete	Individual_Q	1.0	0.05	2500000	8	True
IndivQLearningTabularAllButSUNY25/9_0_9	centralized	True	-10	True	GridWorld	Pentagon	FullObsDiscrete	Individual_Q	1.0	0.05	2500000	9	True
IndivQLearningTabularAllButSUNY25/10_1_0	decentralized	True	-10	True	GridWorld	Pentagon	FullObsDiscrete	Individual_Q	1.0	0.05	2500000	0	True
IndivQLearningTabularAllButSUNY25/11_1_1	decentralized	True	-10	True	GridWorld	Pentagon	FullObsDiscrete	Individual_Q	1.0	0.05	2500000	1	True
IndivQLearningTabularAllButSUNY25/12_1_2	decentralized	True	-10	True	GridWorld	Pentagon	FullObsDiscrete	Individual_Q	1.0	0.05	2500000	2	True
IndivQLearningTabularAllButSUNY25/13_1_3	decentralized	True	-10	True	GridWorld	Pentagon	FullObsDiscrete	Individual_Q	1.0	0.05	2500000	3	True
IndivQLearningTabularAllButSUNY25/14_1_4	decentralized	True	-10	True	GridWorld	Pentagon	FullObsDiscrete	Individual_Q	1.0	0.05	2500000	4	True
IndivQLearningTabularAllButSUNY25/15_1_5	decentralized	True	-10	True	GridWorld	Pentagon	FullObsDiscrete	Individual_Q	1.0	0.05	2500000	5	True
IndivQLearningTabularAllButSUNY25/16_1_6	decentralized	True	-10	True	GridWorld	Pentagon	FullObsDiscrete	Individual_Q	1.0	0.05	2500000	6	True
IndivQLearningTabularAllButSUNY25/17_1_7	decentralized	True	-10	True	GridWorld	Pentagon	FullObsDiscrete	Individual_Q	1.0	0.05	2500000	7	True
IndivQLearningTabularAllButSUNY25/18_1_8	decentralized	True	-10	True	GridWorld	Pentagon	FullObsDiscrete	Individual_Q	1.0	0.05	2500000	8	True
IndivQLearningTabularAllButSUNY25/19_1_9	decentralized	True	-10	True	GridWorld	Pentagon	FullObsDiscrete	Individual_Q	1.0	0.05	2500000	9	True
IndivQLearningTabularAllButSUNY25/20_2_0	none	True	-10	True	GridWorld	Pentagon	FullObsDiscrete	Individual_Q	1.0	0.05	2500000	0	True
IndivQLearningTabularAllButSUNY25/21_2_1	none	True	-10	True	GridWorld	Pentagon	FullObsDiscrete	Individual_Q	1.0	0.05	2500000	1	True
IndivQLearningTabularAllButSUNY25/22_2_2	none	True	-10	True	GridWorld	Pentagon	FullObsDiscrete	Individual_Q	1.0	0.05	2500000	2	True
IndivQLearningTabularAllButSUNY25/23_2_3	none	True	-10	True	GridWorld	Pentagon	FullObsDiscrete	Individual_Q	1.0	0.05	2500000	3	True
IndivQLearningTabularAllButSUNY25/24_2_4	none	True	-10	True	GridWorld	Pentagon	FullObsDiscrete	Individual_Q	1.0	0.05	2500000	4	True
IndivQLearningTabularAllButSUNY25/25_2_5	none	True	-10	True	GridWorld	Pentagon	FullObsDiscrete	Individual_Q	1.0	0.05	2500000	5	True
IndivQLearningTabularAllButSUNY25/26_2_6	none	True	-10	True	GridWorld	Pentagon	FullObsDiscrete	Individual_Q	1.0	0.05	2500000	6	True
IndivQLearningTabularAllButSUNY25/27_2_7	none	True	-10	True	GridWorld	Pentagon	FullObsDiscrete	Individual_Q	1.0	0.05	2500000	7	True
IndivQLearningTabularAllButSUNY25/28_2_8	none	True	-10	True	GridWorld	Pentagon	FullObsDiscrete	Individual_Q	1.0	0.05	2500000	8	True
IndivQLearningTabularAllButSUNY25/29_2_9	none	True	-10	True	GridWorld	Pentagon	FullObsDiscrete	Individual_Q	1.0	0.05	2500000	9	True
IndivQLearningTabularAllButSUNY25/30_3_0	centralized	True	-10	True	GridWorld	ISR	FullObsDiscrete	Individual_Q	1.0	0.05	2500000	0	True
IndivQLearningTabularAllButSUNY25/31_3_1	centralized	True	-10	True	GridWorld	ISR	FullObsDiscrete	Individual_Q	1.0	0.05	2500000	1	True
IndivQLearningTabularAllButSUNY25/32_3_2	centralized	True	-10	True	GridWorld	ISR	FullObsDiscrete	Individual_Q	1.0	0.05	2500000	2	True
IndivQLearningTabularAllButSUNY25/33_3_3	centralized	True	-10	True	GridWorld	ISR	FullObsDiscrete	Individual_Q	1.0	0.05	2500000	3	True
IndivQLearningTabularAllButSUNY25/34_3_4	centralized	True	-10	True	GridWorld	ISR	FullObsDiscrete	Individual_Q	1.0	0.05	2500000	4	True
IndivQLearningTabularAllButSUNY25/35_3_5	centralized	True	-10	True	GridWorld	ISR	FullObsDiscrete	Individual_Q	1.0	0.05	2500000	5	True
IndivQLearningTabularAllButSUNY25/36_3_6	centralized	True	-10	True	GridWorld	ISR	FullObsDiscrete	Individual_Q	1.0	0.05	2500000	6	True
IndivQLearningTabularAllButSUNY25/37_3_7	centralized	True	-10	True	GridWorld	ISR	FullObsDiscrete	Individual_Q	1.0	0.05	2500000	7	True
IndivQLearningTabularAllButSUNY25/38_3_8	centralized	True	-10	True	GridWorld	ISR	FullObsDiscrete	Individual_Q	1.0	0.05	2500000	8	True
IndivQLearningTabularAllButSUNY25/39_3_9	centralized	True	-10	True	GridWorld	ISR	FullObsDiscrete	Individual_Q	1.0	0.05	2500000	9	True
IndivQLearningTabularAllButSUNY25/40_4_0	decentralized	True	-10	True	GridWorld	ISR	FullObsDiscrete	Individual_Q	1.0	0.05	2500000	0	True
IndivQLearningTabularAllButSUNY25/41_4_1	decentralized	True	-10	True	GridWorld	ISR	FullObsDiscrete	Individual_Q	1.0	0.05	2500000	1	True
IndivQLearningTabularAllButSUNY25/42_4_2	decentralized	True	-10	True	GridWorld	ISR	FullObsDiscrete	Individual_Q	1.0	0.05	2500000	2	True
IndivQLearningTabularAllButSUNY25/43_4_3	decentralized	True	-10	True	GridWorld	ISR	FullObsDiscrete	Individual_Q	1.0	0.05	2500000	3	True
IndivQLearningTabularAllButSUNY25/44_4_4	decentralized	True	-10	True	GridWorld	ISR	FullObsDiscrete	Individual_Q	1.0	0.05	2500000	4	True
IndivQLearningTabularAllButSUNY25/45_4_5	decentralized	True	-10	True	GridWorld	ISR	FullObsDiscrete	Individual_Q	1.0	0.05	2500000	5	True
IndivQLearningTabularAllButSUNY25/46_4_6	decentralized	True	-10	True	GridWorld	ISR	FullObsDiscrete	Individual_Q	1.0	0.05	2500000	6	True
IndivQLearningTabularAllButSUNY25/47_4_7	decentralized	True	-10	True	GridWorld	ISR	FullObsDiscrete	Individual_Q	1.0	0.05	2500000	7	True
IndivQLearningTabularAllButSUNY25/48_4_8	decentralized	True	-10	True	GridWorld	ISR	FullObsDiscrete	Individual_Q	1.0	0.05	2500000	8	True
IndivQLearningTabularAllButSUNY25/49_4_9	decentralized	True	-10	True	GridWorld	ISR	FullObsDiscrete	Individual_Q	1.0	0.05	2500000	9	True
IndivQLearningTabularAllButSUNY25/50_5_0	none	True	-10	True	GridWorld	ISR	FullObsDiscrete	Individual_Q	1.0	0.05	2500000	0	True
IndivQLearningTabularAllButSUNY25/51_5_1	none	True	-10	True	GridWorld	ISR	FullObsDiscrete	Individual_Q	1.0	0.05	2500000	1	True
IndivQLearningTabularAllButSUNY25/52_5_2	none	True	-10	True	GridWorld	ISR	FullObsDiscrete	Individual_Q	1.0	0.05	2500000	2	True
IndivQLearningTabularAllButSUNY25/53_5_3	none	True	-10	True	GridWorld	ISR	FullObsDiscrete	Individual_Q	1.0	0.05	2500000	3	True
IndivQLearningTabularAllButSUNY25/54_5_4	none	True	-10	True	GridWorld	ISR	FullObsDiscrete	Individual_Q	1.0	0.05	2500000	4	True
IndivQLearningTabularAllButSUNY25/55_5_5	none	True	-10	True	GridWorld	ISR	FullObsDiscrete	Individual_Q	1.0	0.05	2500000	5	True
IndivQLearningTabularAllButSUNY25/56_5_6	none	True	-10	True	GridWorld	ISR	FullObsDiscrete	Individual_Q	1.0	0.05	2500000	6	True
IndivQLearningTabularAllButSUNY25/57_5_7	none	True	-10	True	GridWorld	ISR	FullObsDiscrete	Individual_Q	1.0	0.05	2500000	7	True
IndivQLearningTabularAllButSUNY25/58_5_8	none	True	-10	True	GridWorld	ISR	FullObsDiscrete	Individual_Q	1.0	0.05	2500000	8	True
IndivQLearningTabularAllButSUNY25/59_5_9	none	True	-10	True	GridWorld	ISR	FullObsDiscrete	Individual_Q	1.0	0.05	2500000	9	True
IndivQLearningTabularAllButSUNY25/60_6_0	centralized	True	-10	True	GridWorld	MIT	FullObsDiscrete	Individual_Q	1.0	0.05	2500000	0	True
IndivQLearningTabularAllButSUNY25/61_6_1	centralized	True	-10	True	GridWorld	MIT	FullObsDiscrete	Individual_Q	1.0	0.05	2500000	1	True
IndivQLearningTabularAllButSUNY25/62_6_2	centralized	True	-10	True	GridWorld	MIT	FullObsDiscrete	Individual_Q	1.0	0.05	2500000	2	True
IndivQLearningTabularAllButSUNY25/63_6_3	centralized	True	-10	True	GridWorld	MIT	FullObsDiscrete	Individual_Q	1.0	0.05	2500000	3	True
IndivQLearningTabularAllButSUNY25/64_6_4	centralized	True	-10	True	GridWorld	MIT	FullObsDiscrete	Individual_Q	1.0	0.05	2500000	4	True
IndivQLearningTabularAllButSUNY25/65_6_5	centralized	True	-10	True	GridWorld	MIT	FullObsDiscrete	Individual_Q	1.0	0.05	2500000	5	True
IndivQLearningTabularAllButSUNY25/66_6_6	centralized	True	-10	True	GridWorld	MIT	FullObsDiscrete	Individual_Q	1.0	0.05	2500000	6	True
IndivQLearningTabularAllButSUNY25/67_6_7	centralized	True	-10	True	GridWorld	MIT	FullObsDiscrete	Individual_Q	1.0	0.05	2500000	7	True
IndivQLearningTabularAllButSUNY25/68_6_8	centralized	True	-10	True	GridWorld	MIT	FullObsDiscrete	Individual_Q	1.0	0.05	2500000	8	True
IndivQLearningTabularAllButSUNY25/69_6_9	centralized	True	-10	True	GridWorld	MIT	FullObsDiscrete	Individual_Q	1.0	0.05	2500000	9	True
IndivQLearningTabularAllButSUNY25/70_7_0	decentralized	True	-10	True	GridWorld	MIT	FullObsDiscrete	Individual_Q	1.0	0.05	2500000	0	True
IndivQLearningTabularAllButSUNY25/71_7_1	decentralized	True	-10	True	GridWorld	MIT	FullObsDiscrete	Individual_Q	1.0	0.05	2500000	1	True
IndivQLearningTabularAllButSUNY25/72_7_2	decentralized	True	-10	True	GridWorld	MIT	FullObsDiscrete	Individual_Q	1.0	0.05	2500000	2	True
IndivQLearningTabularAllButSUNY25/73_7_3	decentralized	True	-10	True	GridWorld	MIT	FullObsDiscrete	Individual_Q	1.0	0.05	2500000	3	True
IndivQLearningTabularAllButSUNY25/74_7_4	decentralized	True	-10	True	GridWorld	MIT	FullObsDiscrete	Individual_Q	1.0	0.05	2500000	4	True
IndivQLearningTabularAllButSUNY25/75_7_5	decentralized	True	-10	True	GridWorld	MIT	FullObsDiscrete	Individual_Q	1.0	0.05	2500000	5	True
IndivQLearningTabularAllButSUNY25/76_7_6	decentralized	True	-10	True	GridWorld	MIT	FullObsDiscrete	Individual_Q	1.0	0.05	2500000	6	True
IndivQLearningTabularAllButSUNY25/77_7_7	decentralized	True	-10	True	GridWorld	MIT	FullObsDiscrete	Individual_Q	1.0	0.05	2500000	7	True
IndivQLearningTabularAllButSUNY25/78_7_8	decentralized	True	-10	True	GridWorld	MIT	FullObsDiscrete	Individual_Q	1.0	0.05	2500000	8	True
IndivQLearningTabularAllButSUNY25/79_7_9	decentralized	True	-10	True	GridWorld	MIT	FullObsDiscrete	Individual_Q	1.0	0.05	2500000	9	True
IndivQLearningTabularAllButSUNY25/80_8_0	none	True	-10	True	GridWorld	MIT	FullObsDiscrete	Individual_Q	1.0	0.05	2500000	0	True
IndivQLearningTabularAllButSUNY25/81_8_1	none	True	-10	True	GridWorld	MIT	FullObsDiscrete	Individual_Q	1.0	0.05	2500000	1	True
IndivQLearningTabularAllButSUNY25/82_8_2	none	True	-10	True	GridWorld	MIT	FullObsDiscrete	Individual_Q	1.0	0.05	2500000	2	True
IndivQLearningTabularAllButSUNY25/83_8_3	none	True	-10	True	GridWorld	MIT	FullObsDiscrete	Individual_Q	1.0	0.05	2500000	3	True
IndivQLearningTabularAllButSUNY25/84_8_4	none	True	-10	True	GridWorld	MIT	FullObsDiscrete	Individual_Q	1.0	0.05	2500000	4	True
IndivQLearningTabularAllButSUNY25/85_8_5	none	True	-10	True	GridWorld	MIT	FullObsDiscrete	Individual_Q	1.0	0.05	2500000	5	True
IndivQLearningTabularAllButSUNY25/86_8_6	none	True	-10	True	GridWorld	MIT	FullObsDiscrete	Individual_Q	1.0	0.05	2500000	6	True
IndivQLearningTabularAllButSUNY25/87_8_7	none	True	-10	True	GridWorld	MIT	FullObsDiscrete	Individual_Q	1.0	0.05	2500000	7	True
IndivQLearningTabularAllButSUNY25/88_8_8	none	True	-10	True	GridWorld	MIT	FullObsDiscrete	Individual_Q	1.0	0.05	2500000	8	True
IndivQLearningTabularAllButSUNY25/89_8_9	none	True	-10	True	GridWorld	MIT	FullObsDiscrete	Individual_Q	1.0	0.05	2500000	9	True
