# Supplementary material
Source: ML conference proceedings conference paper supplement (https://proceedings.neurips.cc/paper_files/paper/2022/hash/57444e14ecd9e2c8f603b4f012ce3811-Abstract.html)
Supplement: Supplementary file 1 [file 57444e14ecd9e2c8f603b4f012ce3811-Supplemental-Conference.zip › 3410_shield_decentralization_for_sa-Supplementary Material/parallel_configs/IndivQLearningTabularSweepEval.csv]

run_name	shield	punish_unsafe_orig_action	punish_unsafe_orig_action_modifier	randomize_starts	map_type	grid_world_map_name	grid_world_obs_type	learner_type	learner_anneal_eps_start	learner_anneal_eps_finish	max_num_episodes	seed	skip_training	evaluation_run_name	evaluation_shield	learner_evaluation_epsilon
IndivQLearningTabularSweep/0_0_0	centralized	True	-10	True	GridWorld	Pentagon	FullObsDiscrete	Individual_Q	1.0	0.05	1000	0	True	IndivQLearningTabularSweep/0_0_0_centralized	centralized	0.05
IndivQLearningTabularSweep/0_0_0	centralized	True	-10	True	GridWorld	Pentagon	FullObsDiscrete	Individual_Q	1.0	0.05	1000	0	True	IndivQLearningTabularSweep/0_0_0_decentralized	decentralized	0.05
IndivQLearningTabularSweep/0_0_0	centralized	True	-10	True	GridWorld	Pentagon	FullObsDiscrete	Individual_Q	1.0	0.05	1000	0	True	IndivQLearningTabularSweep/0_0_0_none	none	0.05
IndivQLearningTabularSweep/1_0_1	centralized	True	-10	True	GridWorld	Pentagon	FullObsDiscrete	Individual_Q	1.0	0.05	1000	1	True	IndivQLearningTabularSweep/1_0_1_centralized	centralized	0.05
IndivQLearningTabularSweep/1_0_1	centralized	True	-10	True	GridWorld	Pentagon	FullObsDiscrete	Individual_Q	1.0	0.05	1000	1	True	IndivQLearningTabularSweep/1_0_1_decentralized	decentralized	0.05
IndivQLearningTabularSweep/1_0_1	centralized	True	-10	True	GridWorld	Pentagon	FullObsDiscrete	Individual_Q	1.0	0.05	1000	1	True	IndivQLearningTabularSweep/1_0_1_none	none	0.05
IndivQLearningTabularSweep/2_0_2	centralized	True	-10	True	GridWorld	Pentagon	FullObsDiscrete	Individual_Q	1.0	0.05	1000	2	True	IndivQLearningTabularSweep/2_0_2_centralized	centralized	0.05
IndivQLearningTabularSweep/2_0_2	centralized	True	-10	True	GridWorld	Pentagon	FullObsDiscrete	Individual_Q	1.0	0.05	1000	2	True	IndivQLearningTabularSweep/2_0_2_decentralized	decentralized	0.05
IndivQLearningTabularSweep/2_0_2	centralized	True	-10	True	GridWorld	Pentagon	FullObsDiscrete	Individual_Q	1.0	0.05	1000	2	True	IndivQLearningTabularSweep/2_0_2_none	none	0.05
IndivQLearningTabularSweep/3_0_3	centralized	True	-10	True	GridWorld	Pentagon	FullObsDiscrete	Individual_Q	1.0	0.05	1000	3	True	IndivQLearningTabularSweep/3_0_3_centralized	centralized	0.05
IndivQLearningTabularSweep/3_0_3	centralized	True	-10	True	GridWorld	Pentagon	FullObsDiscrete	Individual_Q	1.0	0.05	1000	3	True	IndivQLearningTabularSweep/3_0_3_decentralized	decentralized	0.05
IndivQLearningTabularSweep/3_0_3	centralized	True	-10	True	GridWorld	Pentagon	FullObsDiscrete	Individual_Q	1.0	0.05	1000	3	True	IndivQLearningTabularSweep/3_0_3_none	none	0.05
IndivQLearningTabularSweep/4_0_4	centralized	True	-10	True	GridWorld	Pentagon	FullObsDiscrete	Individual_Q	1.0	0.05	1000	4	True	IndivQLearningTabularSweep/4_0_4_centralized	centralized	0.05
IndivQLearningTabularSweep/4_0_4	centralized	True	-10	True	GridWorld	Pentagon	FullObsDiscrete	Individual_Q	1.0	0.05	1000	4	True	IndivQLearningTabularSweep/4_0_4_decentralized	decentralized	0.05
IndivQLearningTabularSweep/4_0_4	centralized	True	-10	True	GridWorld	Pentagon	FullObsDiscrete	Individual_Q	1.0	0.05	1000	4	True	IndivQLearningTabularSweep/4_0_4_none	none	0.05
IndivQLearningTabularSweep/5_0_5	centralized	True	-10	True	GridWorld	Pentagon	FullObsDiscrete	Individual_Q	1.0	0.05	1000	5	True	IndivQLearningTabularSweep/5_0_5_centralized	centralized	0.05
IndivQLearningTabularSweep/5_0_5	centralized	True	-10	True	GridWorld	Pentagon	FullObsDiscrete	Individual_Q	1.0	0.05	1000	5	True	IndivQLearningTabularSweep/5_0_5_decentralized	decentralized	0.05
IndivQLearningTabularSweep/5_0_5	centralized	True	-10	True	GridWorld	Pentagon	FullObsDiscrete	Individual_Q	1.0	0.05	1000	5	True	IndivQLearningTabularSweep/5_0_5_none	none	0.05
IndivQLearningTabularSweep/6_0_6	centralized	True	-10	True	GridWorld	Pentagon	FullObsDiscrete	Individual_Q	1.0	0.05	1000	6	True	IndivQLearningTabularSweep/6_0_6_centralized	centralized	0.05
IndivQLearningTabularSweep/6_0_6	centralized	True	-10	True	GridWorld	Pentagon	FullObsDiscrete	Individual_Q	1.0	0.05	1000	6	True	IndivQLearningTabularSweep/6_0_6_decentralized	decentralized	0.05
IndivQLearningTabularSweep/6_0_6	centralized	True	-10	True	GridWorld	Pentagon	FullObsDiscrete	Individual_Q	1.0	0.05	1000	6	True	IndivQLearningTabularSweep/6_0_6_none	none	0.05
IndivQLearningTabularSweep/7_0_7	centralized	True	-10	True	GridWorld	Pentagon	FullObsDiscrete	Individual_Q	1.0	0.05	1000	7	True	IndivQLearningTabularSweep/7_0_7_centralized	centralized	0.05
IndivQLearningTabularSweep/7_0_7	centralized	True	-10	True	GridWorld	Pentagon	FullObsDiscrete	Individual_Q	1.0	0.05	1000	7	True	IndivQLearningTabularSweep/7_0_7_decentralized	decentralized	0.05
IndivQLearningTabularSweep/7_0_7	centralized	True	-10	True	GridWorld	Pentagon	FullObsDiscrete	Individual_Q	1.0	0.05	1000	7	True	IndivQLearningTabularSweep/7_0_7_none	none	0.05
IndivQLearningTabularSweep/8_0_8	centralized	True	-10	True	GridWorld	Pentagon	FullObsDiscrete	Individual_Q	1.0	0.05	1000	8	True	IndivQLearningTabularSweep/8_0_8_centralized	centralized	0.05
IndivQLearningTabularSweep/8_0_8	centralized	True	-10	True	GridWorld	Pentagon	FullObsDiscrete	Individual_Q	1.0	0.05	1000	8	True	IndivQLearningTabularSweep/8_0_8_decentralized	decentralized	0.05
IndivQLearningTabularSweep/8_0_8	centralized	True	-10	True	GridWorld	Pentagon	FullObsDiscrete	Individual_Q	1.0	0.05	1000	8	True	IndivQLearningTabularSweep/8_0_8_none	none	0.05
IndivQLearningTabularSweep/9_0_9	centralized	True	-10	True	GridWorld	Pentagon	FullObsDiscrete	Individual_Q	1.0	0.05	1000	9	True	IndivQLearningTabularSweep/9_0_9_centralized	centralized	0.05
IndivQLearningTabularSweep/9_0_9	centralized	True	-10	True	GridWorld	Pentagon	FullObsDiscrete	Individual_Q	1.0	0.05	1000	9	True	IndivQLearningTabularSweep/9_0_9_decentralized	decentralized	0.05
IndivQLearningTabularSweep/9_0_9	centralized	True	-10	True	GridWorld	Pentagon	FullObsDiscrete	Individual_Q	1.0	0.05	1000	9	True	IndivQLearningTabularSweep/9_0_9_none	none	0.05
IndivQLearningTabularSweep/10_1_0	decentralized	True	-10	True	GridWorld	Pentagon	FullObsDiscrete	Individual_Q	1.0	0.05	1000	0	True	IndivQLearningTabularSweep/10_1_0_centralized	centralized	0.05
IndivQLearningTabularSweep/10_1_0	decentralized	True	-10	True	GridWorld	Pentagon	FullObsDiscrete	Individual_Q	1.0	0.05	1000	0	True	IndivQLearningTabularSweep/10_1_0_decentralized	decentralized	0.05
IndivQLearningTabularSweep/10_1_0	decentralized	True	-10	True	GridWorld	Pentagon	FullObsDiscrete	Individual_Q	1.0	0.05	1000	0	True	IndivQLearningTabularSweep/10_1_0_none	none	0.05
IndivQLearningTabularSweep/11_1_1	decentralized	True	-10	True	GridWorld	Pentagon	FullObsDiscrete	Individual_Q	1.0	0.05	1000	1	True	IndivQLearningTabularSweep/11_1_1_centralized	centralized	0.05
IndivQLearningTabularSweep/11_1_1	decentralized	True	-10	True	GridWorld	Pentagon	FullObsDiscrete	Individual_Q	1.0	0.05	1000	1	True	IndivQLearningTabularSweep/11_1_1_decentralized	decentralized	0.05
IndivQLearningTabularSweep/11_1_1	decentralized	True	-10	True	GridWorld	Pentagon	FullObsDiscrete	Individual_Q	1.0	0.05	1000	1	True	IndivQLearningTabularSweep/11_1_1_none	none	0.05
IndivQLearningTabularSweep/12_1_2	decentralized	True	-10	True	GridWorld	Pentagon	FullObsDiscrete	Individual_Q	1.0	0.05	1000	2	True	IndivQLearningTabularSweep/12_1_2_centralized	centralized	0.05
IndivQLearningTabularSweep/12_1_2	decentralized	True	-10	True	GridWorld	Pentagon	FullObsDiscrete	Individual_Q	1.0	0.05	1000	2	True	IndivQLearningTabularSweep/12_1_2_decentralized	decentralized	0.05
IndivQLearningTabularSweep/12_1_2	decentralized	True	-10	True	GridWorld	Pentagon	FullObsDiscrete	Individual_Q	1.0	0.05	1000	2	True	IndivQLearningTabularSweep/12_1_2_none	none	0.05
IndivQLearningTabularSweep/13_1_3	decentralized	True	-10	True	GridWorld	Pentagon	FullObsDiscrete	Individual_Q	1.0	0.05	1000	3	True	IndivQLearningTabularSweep/13_1_3_centralized	centralized	0.05
IndivQLearningTabularSweep/13_1_3	decentralized	True	-10	True	GridWorld	Pentagon	FullObsDiscrete	Individual_Q	1.0	0.05	1000	3	True	IndivQLearningTabularSweep/13_1_3_decentralized	decentralized	0.05
IndivQLearningTabularSweep/13_1_3	decentralized	True	-10	True	GridWorld	Pentagon	FullObsDiscrete	Individual_Q	1.0	0.05	1000	3	True	IndivQLearningTabularSweep/13_1_3_none	none	0.05
IndivQLearningTabularSweep/14_1_4	decentralized	True	-10	True	GridWorld	Pentagon	FullObsDiscrete	Individual_Q	1.0	0.05	1000	4	True	IndivQLearningTabularSweep/14_1_4_centralized	centralized	0.05
IndivQLearningTabularSweep/14_1_4	decentralized	True	-10	True	GridWorld	Pentagon	FullObsDiscrete	Individual_Q	1.0	0.05	1000	4	True	IndivQLearningTabularSweep/14_1_4_decentralized	decentralized	0.05
IndivQLearningTabularSweep/14_1_4	decentralized	True	-10	True	GridWorld	Pentagon	FullObsDiscrete	Individual_Q	1.0	0.05	1000	4	True	IndivQLearningTabularSweep/14_1_4_none	none	0.05
IndivQLearningTabularSweep/15_1_5	decentralized	True	-10	True	GridWorld	Pentagon	FullObsDiscrete	Individual_Q	1.0	0.05	1000	5	True	IndivQLearningTabularSweep/15_1_5_centralized	centralized	0.05
IndivQLearningTabularSweep/15_1_5	decentralized	True	-10	True	GridWorld	Pentagon	FullObsDiscrete	Individual_Q	1.0	0.05	1000	5	True	IndivQLearningTabularSweep/15_1_5_decentralized	decentralized	0.05
IndivQLearningTabularSweep/15_1_5	decentralized	True	-10	True	GridWorld	Pentagon	FullObsDiscrete	Individual_Q	1.0	0.05	1000	5	True	IndivQLearningTabularSweep/15_1_5_none	none	0.05
IndivQLearningTabularSweep/16_1_6	decentralized	True	-10	True	GridWorld	Pentagon	FullObsDiscrete	Individual_Q	1.0	0.05	1000	6	True	IndivQLearningTabularSweep/16_1_6_centralized	centralized	0.05
IndivQLearningTabularSweep/16_1_6	decentralized	True	-10	True	GridWorld	Pentagon	FullObsDiscrete	Individual_Q	1.0	0.05	1000	6	True	IndivQLearningTabularSweep/16_1_6_decentralized	decentralized	0.05
IndivQLearningTabularSweep/16_1_6	decentralized	True	-10	True	GridWorld	Pentagon	FullObsDiscrete	Individual_Q	1.0	0.05	1000	6	True	IndivQLearningTabularSweep/16_1_6_none	none	0.05
IndivQLearningTabularSweep/17_1_7	decentralized	True	-10	True	GridWorld	Pentagon	FullObsDiscrete	Individual_Q	1.0	0.05	1000	7	True	IndivQLearningTabularSweep/17_1_7_centralized	centralized	0.05
IndivQLearningTabularSweep/17_1_7	decentralized	True	-10	True	GridWorld	Pentagon	FullObsDiscrete	Individual_Q	1.0	0.05	1000	7	True	IndivQLearningTabularSweep/17_1_7_decentralized	decentralized	0.05
IndivQLearningTabularSweep/17_1_7	decentralized	True	-10	True	GridWorld	Pentagon	FullObsDiscrete	Individual_Q	1.0	0.05	1000	7	True	IndivQLearningTabularSweep/17_1_7_none	none	0.05
IndivQLearningTabularSweep/18_1_8	decentralized	True	-10	True	GridWorld	Pentagon	FullObsDiscrete	Individual_Q	1.0	0.05	1000	8	True	IndivQLearningTabularSweep/18_1_8_centralized	centralized	0.05
IndivQLearningTabularSweep/18_1_8	decentralized	True	-10	True	GridWorld	Pentagon	FullObsDiscrete	Individual_Q	1.0	0.05	1000	8	True	IndivQLearningTabularSweep/18_1_8_decentralized	decentralized	0.05
IndivQLearningTabularSweep/18_1_8	decentralized	True	-10	True	GridWorld	Pentagon	FullObsDiscrete	Individual_Q	1.0	0.05	1000	8	True	IndivQLearningTabularSweep/18_1_8_none	none	0.05
IndivQLearningTabularSweep/19_1_9	decentralized	True	-10	True	GridWorld	Pentagon	FullObsDiscrete	Individual_Q	1.0	0.05	1000	9	True	IndivQLearningTabularSweep/19_1_9_centralized	centralized	0.05
IndivQLearningTabularSweep/19_1_9	decentralized	True	-10	True	GridWorld	Pentagon	FullObsDiscrete	Individual_Q	1.0	0.05	1000	9	True	IndivQLearningTabularSweep/19_1_9_decentralized	decentralized	0.05
IndivQLearningTabularSweep/19_1_9	decentralized	True	-10	True	GridWorld	Pentagon	FullObsDiscrete	Individual_Q	1.0	0.05	1000	9	True	IndivQLearningTabularSweep/19_1_9_none	none	0.05
IndivQLearningTabularSweep/20_2_0	none	True	-10	True	GridWorld	Pentagon	FullObsDiscrete	Individual_Q	1.0	0.05	1000	0	True	IndivQLearningTabularSweep/20_2_0_centralized	centralized	0.05
IndivQLearningTabularSweep/20_2_0	none	True	-10	True	GridWorld	Pentagon	FullObsDiscrete	Individual_Q	1.0	0.05	1000	0	True	IndivQLearningTabularSweep/20_2_0_decentralized	decentralized	0.05
IndivQLearningTabularSweep/20_2_0	none	True	-10	True	GridWorld	Pentagon	FullObsDiscrete	Individual_Q	1.0	0.05	1000	0	True	IndivQLearningTabularSweep/20_2_0_none	none	0.05
IndivQLearningTabularSweep/21_2_1	none	True	-10	True	GridWorld	Pentagon	FullObsDiscrete	Individual_Q	1.0	0.05	1000	1	True	IndivQLearningTabularSweep/21_2_1_centralized	centralized	0.05
IndivQLearningTabularSweep/21_2_1	none	True	-10	True	GridWorld	Pentagon	FullObsDiscrete	Individual_Q	1.0	0.05	1000	1	True	IndivQLearningTabularSweep/21_2_1_decentralized	decentralized	0.05
IndivQLearningTabularSweep/21_2_1	none	True	-10	True	GridWorld	Pentagon	FullObsDiscrete	Individual_Q	1.0	0.05	1000	1	True	IndivQLearningTabularSweep/21_2_1_none	none	0.05
IndivQLearningTabularSweep/22_2_2	none	True	-10	True	GridWorld	Pentagon	FullObsDiscrete	Individual_Q	1.0	0.05	1000	2	True	IndivQLearningTabularSweep/22_2_2_centralized	centralized	0.05
IndivQLearningTabularSweep/22_2_2	none	True	-10	True	GridWorld	Pentagon	FullObsDiscrete	Individual_Q	1.0	0.05	1000	2	True	IndivQLearningTabularSweep/22_2_2_decentralized	decentralized	0.05
IndivQLearningTabularSweep/22_2_2	none	True	-10	True	GridWorld	Pentagon	FullObsDiscrete	Individual_Q	1.0	0.05	1000	2	True	IndivQLearningTabularSweep/22_2_2_none	none	0.05
IndivQLearningTabularSweep/23_2_3	none	True	-10	True	GridWorld	Pentagon	FullObsDiscrete	Individual_Q	1.0	0.05	1000	3	True	IndivQLearningTabularSweep/23_2_3_centralized	centralized	0.05
IndivQLearningTabularSweep/23_2_3	none	True	-10	True	GridWorld	Pentagon	FullObsDiscrete	Individual_Q	1.0	0.05	1000	3	True	IndivQLearningTabularSweep/23_2_3_decentralized	decentralized	0.05
IndivQLearningTabularSweep/23_2_3	none	True	-10	True	GridWorld	Pentagon	FullObsDiscrete	Individual_Q	1.0	0.05	1000	3	True	IndivQLearningTabularSweep/23_2_3_none	none	0.05
IndivQLearningTabularSweep/24_2_4	none	True	-10	True	GridWorld	Pentagon	FullObsDiscrete	Individual_Q	1.0	0.05	1000	4	True	IndivQLearningTabularSweep/24_2_4_centralized	centralized	0.05
IndivQLearningTabularSweep/24_2_4	none	True	-10	True	GridWorld	Pentagon	FullObsDiscrete	Individual_Q	1.0	0.05	1000	4	True	IndivQLearningTabularSweep/24_2_4_decentralized	decentralized	0.05
IndivQLearningTabularSweep/24_2_4	none	True	-10	True	GridWorld	Pentagon	FullObsDiscrete	Individual_Q	1.0	0.05	1000	4	True	IndivQLearningTabularSweep/24_2_4_none	none	0.05
IndivQLearningTabularSweep/25_2_5	none	True	-10	True	GridWorld	Pentagon	FullObsDiscrete	Individual_Q	1.0	0.05	1000	5	True	IndivQLearningTabularSweep/25_2_5_centralized	centralized	0.05
IndivQLearningTabularSweep/25_2_5	none	True	-10	True	GridWorld	Pentagon	FullObsDiscrete	Individual_Q	1.0	0.05	1000	5	True	IndivQLearningTabularSweep/25_2_5_decentralized	decentralized	0.05
IndivQLearningTabularSweep/25_2_5	none	True	-10	True	GridWorld	Pentagon	FullObsDiscrete	Individual_Q	1.0	0.05	1000	5	True	IndivQLearningTabularSweep/25_2_5_none	none	0.05
IndivQLearningTabularSweep/26_2_6	none	True	-10	True	GridWorld	Pentagon	FullObsDiscrete	Individual_Q	1.0	0.05	1000	6	True	IndivQLearningTabularSweep/26_2_6_centralized	centralized	0.05
IndivQLearningTabularSweep/26_2_6	none	True	-10	True	GridWorld	Pentagon	FullObsDiscrete	Individual_Q	1.0	0.05	1000	6	True	IndivQLearningTabularSweep/26_2_6_decentralized	decentralized	0.05
IndivQLearningTabularSweep/26_2_6	none	True	-10	True	GridWorld	Pentagon	FullObsDiscrete	Individual_Q	1.0	0.05	1000	6	True	IndivQLearningTabularSweep/26_2_6_none	none	0.05
IndivQLearningTabularSweep/27_2_7	none	True	-10	True	GridWorld	Pentagon	FullObsDiscrete	Individual_Q	1.0	0.05	1000	7	True	IndivQLearningTabularSweep/27_2_7_centralized	centralized	0.05
IndivQLearningTabularSweep/27_2_7	none	True	-10	True	GridWorld	Pentagon	FullObsDiscrete	Individual_Q	1.0	0.05	1000	7	True	IndivQLearningTabularSweep/27_2_7_decentralized	decentralized	0.05
IndivQLearningTabularSweep/27_2_7	none	True	-10	True	GridWorld	Pentagon	FullObsDiscrete	Individual_Q	1.0	0.05	1000	7	True	IndivQLearningTabularSweep/27_2_7_none	none	0.05
IndivQLearningTabularSweep/28_2_8	none	True	-10	True	GridWorld	Pentagon	FullObsDiscrete	Individual_Q	1.0	0.05	1000	8	True	IndivQLearningTabularSweep/28_2_8_centralized	centralized	0.05
IndivQLearningTabularSweep/28_2_8	none	True	-10	True	GridWorld	Pentagon	FullObsDiscrete	Individual_Q	1.0	0.05	1000	8	True	IndivQLearningTabularSweep/28_2_8_decentralized	decentralized	0.05
IndivQLearningTabularSweep/28_2_8	none	True	-10	True	GridWorld	Pentagon	FullObsDiscrete	Individual_Q	1.0	0.05	1000	8	True	IndivQLearningTabularSweep/28_2_8_none	none	0.05
IndivQLearningTabularSweep/29_2_9	none	True	-10	True	GridWorld	Pentagon	FullObsDiscrete	Individual_Q	1.0	0.05	1000	9	True	IndivQLearningTabularSweep/29_2_9_centralized	centralized	0.05
IndivQLearningTabularSweep/29_2_9	none	True	-10	True	GridWorld	Pentagon	FullObsDiscrete	Individual_Q	1.0	0.05	1000	9	True	IndivQLearningTabularSweep/29_2_9_decentralized	decentralized	0.05
IndivQLearningTabularSweep/29_2_9	none	True	-10	True	GridWorld	Pentagon	FullObsDiscrete	Individual_Q	1.0	0.05	1000	9	True	IndivQLearningTabularSweep/29_2_9_none	none	0.05
IndivQLearningTabularSweep/30_3_0	centralized	True	-10	False	GridWorld	Pentagon	FullObsDiscrete	Individual_Q	1.0	0.05	1000	0	True	IndivQLearningTabularSweep/30_3_0_centralized	centralized	0.05
IndivQLearningTabularSweep/30_3_0	centralized	True	-10	False	GridWorld	Pentagon	FullObsDiscrete	Individual_Q	1.0	0.05	1000	0	True	IndivQLearningTabularSweep/30_3_0_decentralized	decentralized	0.05
IndivQLearningTabularSweep/30_3_0	centralized	True	-10	False	GridWorld	Pentagon	FullObsDiscrete	Individual_Q	1.0	0.05	1000	0	True	IndivQLearningTabularSweep/30_3_0_none	none	0.05
IndivQLearningTabularSweep/31_3_1	centralized	True	-10	False	GridWorld	Pentagon	FullObsDiscrete	Individual_Q	1.0	0.05	1000	1	True	IndivQLearningTabularSweep/31_3_1_centralized	centralized	0.05
IndivQLearningTabularSweep/31_3_1	centralized	True	-10	False	GridWorld	Pentagon	FullObsDiscrete	Individual_Q	1.0	0.05	1000	1	True	IndivQLearningTabularSweep/31_3_1_decentralized	decentralized	0.05
IndivQLearningTabularSweep/31_3_1	centralized	True	-10	False	GridWorld	Pentagon	FullObsDiscrete	Individual_Q	1.0	0.05	1000	1	True	IndivQLearningTabularSweep/31_3_1_none	none	0.05
IndivQLearningTabularSweep/32_3_2	centralized	True	-10	False	GridWorld	Pentagon	FullObsDiscrete	Individual_Q	1.0	0.05	1000	2	True	IndivQLearningTabularSweep/32_3_2_centralized	centralized	0.05
IndivQLearningTabularSweep/32_3_2	centralized	True	-10	False	GridWorld	Pentagon	FullObsDiscrete	Individual_Q	1.0	0.05	1000	2	True	IndivQLearningTabularSweep/32_3_2_decentralized	decentralized	0.05
IndivQLearningTabularSweep/32_3_2	centralized	True	-10	False	GridWorld	Pentagon	FullObsDiscrete	Individual_Q	1.0	0.05	1000	2	True	IndivQLearningTabularSweep/32_3_2_none	none	0.05
IndivQLearningTabularSweep/33_3_3	centralized	True	-10	False	GridWorld	Pentagon	FullObsDiscrete	Individual_Q	1.0	0.05	1000	3	True	IndivQLearningTabularSweep/33_3_3_centralized	centralized	0.05
IndivQLearningTabularSweep/33_3_3	centralized	True	-10	False	GridWorld	Pentagon	FullObsDiscrete	Individual_Q	1.0	0.05	1000	3	True	IndivQLearningTabularSweep/33_3_3_decentralized	decentralized	0.05
IndivQLearningTabularSweep/33_3_3	centralized	True	-10	False	GridWorld	Pentagon	FullObsDiscrete	Individual_Q	1.0	0.05	1000	3	True	IndivQLearningTabularSweep/33_3_3_none	none	0.05
IndivQLearningTabularSweep/34_3_4	centralized	True	-10	False	GridWorld	Pentagon	FullObsDiscrete	Individual_Q	1.0	0.05	1000	4	True	IndivQLearningTabularSweep/34_3_4_centralized	centralized	0.05
IndivQLearningTabularSweep/34_3_4	centralized	True	-10	False	GridWorld	Pentagon	FullObsDiscrete	Individual_Q	1.0	0.05	1000	4	True	IndivQLearningTabularSweep/34_3_4_decentralized	decentralized	0.05
IndivQLearningTabularSweep/34_3_4	centralized	True	-10	False	GridWorld	Pentagon	FullObsDiscrete	Individual_Q	1.0	0.05	1000	4	True	IndivQLearningTabularSweep/34_3_4_none	none	0.05
IndivQLearningTabularSweep/35_3_5	centralized	True	-10	False	GridWorld	Pentagon	FullObsDiscrete	Individual_Q	1.0	0.05	1000	5	True	IndivQLearningTabularSweep/35_3_5_centralized	centralized	0.05
IndivQLearningTabularSweep/35_3_5	centralized	True	-10	False	GridWorld	Pentagon	FullObsDiscrete	Individual_Q	1.0	0.05	1000	5	True	IndivQLearningTabularSweep/35_3_5_decentralized	decentralized	0.05
IndivQLearningTabularSweep/35_3_5	centralized	True	-10	False	GridWorld	Pentagon	FullObsDiscrete	Individual_Q	1.0	0.05	1000	5	True	IndivQLearningTabularSweep/35_3_5_none	none	0.05
IndivQLearningTabularSweep/36_3_6	centralized	True	-10	False	GridWorld	Pentagon	FullObsDiscrete	Individual_Q	1.0	0.05	1000	6	True	IndivQLearningTabularSweep/36_3_6_centralized	centralized	0.05
IndivQLearningTabularSweep/36_3_6	centralized	True	-10	False	GridWorld	Pentagon	FullObsDiscrete	Individual_Q	1.0	0.05	1000	6	True	IndivQLearningTabularSweep/36_3_6_decentralized	decentralized	0.05
IndivQLearningTabularSweep/36_3_6	centralized	True	-10	False	GridWorld	Pentagon	FullObsDiscrete	Individual_Q	1.0	0.05	1000	6	True	IndivQLearningTabularSweep/36_3_6_none	none	0.05
IndivQLearningTabularSweep/37_3_7	centralized	True	-10	False	GridWorld	Pentagon	FullObsDiscrete	Individual_Q	1.0	0.05	1000	7	True	IndivQLearningTabularSweep/37_3_7_centralized	centralized	0.05
IndivQLearningTabularSweep/37_3_7	centralized	True	-10	False	GridWorld	Pentagon	FullObsDiscrete	Individual_Q	1.0	0.05	1000	7	True	IndivQLearningTabularSweep/37_3_7_decentralized	decentralized	0.05
IndivQLearningTabularSweep/37_3_7	centralized	True	-10	False	GridWorld	Pentagon	FullObsDiscrete	Individual_Q	1.0	0.05	1000	7	True	IndivQLearningTabularSweep/37_3_7_none	none	0.05
IndivQLearningTabularSweep/38_3_8	centralized	True	-10	False	GridWorld	Pentagon	FullObsDiscrete	Individual_Q	1.0	0.05	1000	8	True	IndivQLearningTabularSweep/38_3_8_centralized	centralized	0.05
IndivQLearningTabularSweep/38_3_8	centralized	True	-10	False	GridWorld	Pentagon	FullObsDiscrete	Individual_Q	1.0	0.05	1000	8	True	IndivQLearningTabularSweep/38_3_8_decentralized	decentralized	0.05
IndivQLearningTabularSweep/38_3_8	centralized	True	-10	False	GridWorld	Pentagon	FullObsDiscrete	Individual_Q	1.0	0.05	1000	8	True	IndivQLearningTabularSweep/38_3_8_none	none	0.05
IndivQLearningTabularSweep/39_3_9	centralized	True	-10	False	GridWorld	Pentagon	FullObsDiscrete	Individual_Q	1.0	0.05	1000	9	True	IndivQLearningTabularSweep/39_3_9_centralized	centralized	0.05
IndivQLearningTabularSweep/39_3_9	centralized	True	-10	False	GridWorld	Pentagon	FullObsDiscrete	Individual_Q	1.0	0.05	1000	9	True	IndivQLearningTabularSweep/39_3_9_decentralized	decentralized	0.05
IndivQLearningTabularSweep/39_3_9	centralized	True	-10	False	GridWorld	Pentagon	FullObsDiscrete	Individual_Q	1.0	0.05	1000	9	True	IndivQLearningTabularSweep/39_3_9_none	none	0.05
IndivQLearningTabularSweep/40_4_0	decentralized	True	-10	False	GridWorld	Pentagon	FullObsDiscrete	Individual_Q	1.0	0.05	1000	0	True	IndivQLearningTabularSweep/40_4_0_centralized	centralized	0.05
IndivQLearningTabularSweep/40_4_0	decentralized	True	-10	False	GridWorld	Pentagon	FullObsDiscrete	Individual_Q	1.0	0.05	1000	0	True	IndivQLearningTabularSweep/40_4_0_decentralized	decentralized	0.05
IndivQLearningTabularSweep/40_4_0	decentralized	True	-10	False	GridWorld	Pentagon	FullObsDiscrete	Individual_Q	1.0	0.05	1000	0	True	IndivQLearningTabularSweep/40_4_0_none	none	0.05
IndivQLearningTabularSweep/41_4_1	decentralized	True	-10	False	GridWorld	Pentagon	FullObsDiscrete	Individual_Q	1.0	0.05	1000	1	True	IndivQLearningTabularSweep/41_4_1_centralized	centralized	0.05
IndivQLearningTabularSweep/41_4_1	decentralized	True	-10	False	GridWorld	Pentagon	FullObsDiscrete	Individual_Q	1.0	0.05	1000	1	True	IndivQLearningTabularSweep/41_4_1_decentralized	decentralized	0.05
IndivQLearningTabularSweep/41_4_1	decentralized	True	-10	False	GridWorld	Pentagon	FullObsDiscrete	Individual_Q	1.0	0.05	1000	1	True	IndivQLearningTabularSweep/41_4_1_none	none	0.05
IndivQLearningTabularSweep/42_4_2	decentralized	True	-10	False	GridWorld	Pentagon	FullObsDiscrete	Individual_Q	1.0	0.05	1000	2	True	IndivQLearningTabularSweep/42_4_2_centralized	centralized	0.05
IndivQLearningTabularSweep/42_4_2	decentralized	True	-10	False	GridWorld	Pentagon	FullObsDiscrete	Individual_Q	1.0	0.05	1000	2	True	IndivQLearningTabularSweep/42_4_2_decentralized	decentralized	0.05
IndivQLearningTabularSweep/42_4_2	decentralized	True	-10	False	GridWorld	Pentagon	FullObsDiscrete	Individual_Q	1.0	0.05	1000	2	True	IndivQLearningTabularSweep/42_4_2_none	none	0.05
IndivQLearningTabularSweep/43_4_3	decentralized	True	-10	False	GridWorld	Pentagon	FullObsDiscrete	Individual_Q	1.0	0.05	1000	3	True	IndivQLearningTabularSweep/43_4_3_centralized	centralized	0.05
IndivQLearningTabularSweep/43_4_3	decentralized	True	-10	False	GridWorld	Pentagon	FullObsDiscrete	Individual_Q	1.0	0.05	1000	3	True	IndivQLearningTabularSweep/43_4_3_decentralized	decentralized	0.05
IndivQLearningTabularSweep/43_4_3	decentralized	True	-10	False	GridWorld	Pentagon	FullObsDiscrete	Individual_Q	1.0	0.05	1000	3	True	IndivQLearningTabularSweep/43_4_3_none	none	0.05
IndivQLearningTabularSweep/44_4_4	decentralized	True	-10	False	GridWorld	Pentagon	FullObsDiscrete	Individual_Q	1.0	0.05	1000	4	True	IndivQLearningTabularSweep/44_4_4_centralized	centralized	0.05
IndivQLearningTabularSweep/44_4_4	decentralized	True	-10	False	GridWorld	Pentagon	FullObsDiscrete	Individual_Q	1.0	0.05	1000	4	True	IndivQLearningTabularSweep/44_4_4_decentralized	decentralized	0.05
IndivQLearningTabularSweep/44_4_4	decentralized	True	-10	False	GridWorld	Pentagon	FullObsDiscrete	Individual_Q	1.0	0.05	1000	4	True	IndivQLearningTabularSweep/44_4_4_none	none	0.05
IndivQLearningTabularSweep/45_4_5	decentralized	True	-10	False	GridWorld	Pentagon	FullObsDiscrete	Individual_Q	1.0	0.05	1000	5	True	IndivQLearningTabularSweep/45_4_5_centralized	centralized	0.05
IndivQLearningTabularSweep/45_4_5	decentralized	True	-10	False	GridWorld	Pentagon	FullObsDiscrete	Individual_Q	1.0	0.05	1000	5	True	IndivQLearningTabularSweep/45_4_5_decentralized	decentralized	0.05
IndivQLearningTabularSweep/45_4_5	decentralized	True	-10	False	GridWorld	Pentagon	FullObsDiscrete	Individual_Q	1.0	0.05	1000	5	True	IndivQLearningTabularSweep/45_4_5_none	none	0.05
IndivQLearningTabularSweep/46_4_6	decentralized	True	-10	False	GridWorld	Pentagon	FullObsDiscrete	Individual_Q	1.0	0.05	1000	6	True	IndivQLearningTabularSweep/46_4_6_centralized	centralized	0.05
IndivQLearningTabularSweep/46_4_6	decentralized	True	-10	False	GridWorld	Pentagon	FullObsDiscrete	Individual_Q	1.0	0.05	1000	6	True	IndivQLearningTabularSweep/46_4_6_decentralized	decentralized	0.05
IndivQLearningTabularSweep/46_4_6	decentralized	True	-10	False	GridWorld	Pentagon	FullObsDiscrete	Individual_Q	1.0	0.05	1000	6	True	IndivQLearningTabularSweep/46_4_6_none	none	0.05
IndivQLearningTabularSweep/47_4_7	decentralized	True	-10	False	GridWorld	Pentagon	FullObsDiscrete	Individual_Q	1.0	0.05	1000	7	True	IndivQLearningTabularSweep/47_4_7_centralized	centralized	0.05
IndivQLearningTabularSweep/47_4_7	decentralized	True	-10	False	GridWorld	Pentagon	FullObsDiscrete	Individual_Q	1.0	0.05	1000	7	True	IndivQLearningTabularSweep/47_4_7_decentralized	decentralized	0.05
IndivQLearningTabularSweep/47_4_7	decentralized	True	-10	False	GridWorld	Pentagon	FullObsDiscrete	Individual_Q	1.0	0.05	1000	7	True	IndivQLearningTabularSweep/47_4_7_none	none	0.05
IndivQLearningTabularSweep/48_4_8	decentralized	True	-10	False	GridWorld	Pentagon	FullObsDiscrete	Individual_Q	1.0	0.05	1000	8	True	IndivQLearningTabularSweep/48_4_8_centralized	centralized	0.05
IndivQLearningTabularSweep/48_4_8	decentralized	True	-10	False	GridWorld	Pentagon	FullObsDiscrete	Individual_Q	1.0	0.05	1000	8	True	IndivQLearningTabularSweep/48_4_8_decentralized	decentralized	0.05
IndivQLearningTabularSweep/48_4_8	decentralized	True	-10	False	GridWorld	Pentagon	FullObsDiscrete	Individual_Q	1.0	0.05	1000	8	True	IndivQLearningTabularSweep/48_4_8_none	none	0.05
IndivQLearningTabularSweep/49_4_9	decentralized	True	-10	False	GridWorld	Pentagon	FullObsDiscrete	Individual_Q	1.0	0.05	1000	9	True	IndivQLearningTabularSweep/49_4_9_centralized	centralized	0.05
IndivQLearningTabularSweep/49_4_9	decentralized	True	-10	False	GridWorld	Pentagon	FullObsDiscrete	Individual_Q	1.0	0.05	1000	9	True	IndivQLearningTabularSweep/49_4_9_decentralized	decentralized	0.05
IndivQLearningTabularSweep/49_4_9	decentralized	True	-10	False	GridWorld	Pentagon	FullObsDiscrete	Individual_Q	1.0	0.05	1000	9	True	IndivQLearningTabularSweep/49_4_9_none	none	0.05
IndivQLearningTabularSweep/50_5_0	none	True	-10	False	GridWorld	Pentagon	FullObsDiscrete	Individual_Q	1.0	0.05	1000	0	True	IndivQLearningTabularSweep/50_5_0_centralized	centralized	0.05
IndivQLearningTabularSweep/50_5_0	none	True	-10	False	GridWorld	Pentagon	FullObsDiscrete	Individual_Q	1.0	0.05	1000	0	True	IndivQLearningTabularSweep/50_5_0_decentralized	decentralized	0.05
IndivQLearningTabularSweep/50_5_0	none	True	-10	False	GridWorld	Pentagon	FullObsDiscrete	Individual_Q	1.0	0.05	1000	0	True	IndivQLearningTabularSweep/50_5_0_none	none	0.05
IndivQLearningTabularSweep/51_5_1	none	True	-10	False	GridWorld	Pentagon	FullObsDiscrete	Individual_Q	1.0	0.05	1000	1	True	IndivQLearningTabularSweep/51_5_1_centralized	centralized	0.05
IndivQLearningTabularSweep/51_5_1	none	True	-10	False	GridWorld	Pentagon	FullObsDiscrete	Individual_Q	1.0	0.05	1000	1	True	IndivQLearningTabularSweep/51_5_1_decentralized	decentralized	0.05
IndivQLearningTabularSweep/51_5_1	none	True	-10	False	GridWorld	Pentagon	FullObsDiscrete	Individual_Q	1.0	0.05	1000	1	True	IndivQLearningTabularSweep/51_5_1_none	none	0.05
IndivQLearningTabularSweep/52_5_2	none	True	-10	False	GridWorld	Pentagon	FullObsDiscrete	Individual_Q	1.0	0.05	1000	2	True	IndivQLearningTabularSweep/52_5_2_centralized	centralized	0.05
IndivQLearningTabularSweep/52_5_2	none	True	-10	False	GridWorld	Pentagon	FullObsDiscrete	Individual_Q	1.0	0.05	1000	2	True	IndivQLearningTabularSweep/52_5_2_decentralized	decentralized	0.05
IndivQLearningTabularSweep/52_5_2	none	True	-10	False	GridWorld	Pentagon	FullObsDiscrete	Individual_Q	1.0	0.05	1000	2	True	IndivQLearningTabularSweep/52_5_2_none	none	0.05
IndivQLearningTabularSweep/53_5_3	none	True	-10	False	GridWorld	Pentagon	FullObsDiscrete	Individual_Q	1.0	0.05	1000	3	True	IndivQLearningTabularSweep/53_5_3_centralized	centralized	0.05
IndivQLearningTabularSweep/53_5_3	none	True	-10	False	GridWorld	Pentagon	FullObsDiscrete	Individual_Q	1.0	0.05	1000	3	True	IndivQLearningTabularSweep/53_5_3_decentralized	decentralized	0.05
IndivQLearningTabularSweep/53_5_3	none	True	-10	False	GridWorld	Pentagon	FullObsDiscrete	Individual_Q	1.0	0.05	1000	3	True	IndivQLearningTabularSweep/53_5_3_none	none	0.05
IndivQLearningTabularSweep/54_5_4	none	True	-10	False	GridWorld	Pentagon	FullObsDiscrete	Individual_Q	1.0	0.05	1000	4	True	IndivQLearningTabularSweep/54_5_4_centralized	centralized	0.05
IndivQLearningTabularSweep/54_5_4	none	True	-10	False	GridWorld	Pentagon	FullObsDiscrete	Individual_Q	1.0	0.05	1000	4	True	IndivQLearningTabularSweep/54_5_4_decentralized	decentralized	0.05
IndivQLearningTabularSweep/54_5_4	none	True	-10	False	GridWorld	Pentagon	FullObsDiscrete	Individual_Q	1.0	0.05	1000	4	True	IndivQLearningTabularSweep/54_5_4_none	none	0.05
IndivQLearningTabularSweep/55_5_5	none	True	-10	False	GridWorld	Pentagon	FullObsDiscrete	Individual_Q	1.0	0.05	1000	5	True	IndivQLearningTabularSweep/55_5_5_centralized	centralized	0.05
IndivQLearningTabularSweep/55_5_5	none	True	-10	False	GridWorld	Pentagon	FullObsDiscrete	Individual_Q	1.0	0.05	1000	5	True	IndivQLearningTabularSweep/55_5_5_decentralized	decentralized	0.05
IndivQLearningTabularSweep/55_5_5	none	True	-10	False	GridWorld	Pentagon	FullObsDiscrete	Individual_Q	1.0	0.05	1000	5	True	IndivQLearningTabularSweep/55_5_5_none	none	0.05
IndivQLearningTabularSweep/56_5_6	none	True	-10	False	GridWorld	Pentagon	FullObsDiscrete	Individual_Q	1.0	0.05	1000	6	True	IndivQLearningTabularSweep/56_5_6_centralized	centralized	0.05
IndivQLearningTabularSweep/56_5_6	none	True	-10	False	GridWorld	Pentagon	FullObsDiscrete	Individual_Q	1.0	0.05	1000	6	True	IndivQLearningTabularSweep/56_5_6_decentralized	decentralized	0.05
IndivQLearningTabularSweep/56_5_6	none	True	-10	False	GridWorld	Pentagon	FullObsDiscrete	Individual_Q	1.0	0.05	1000	6	True	IndivQLearningTabularSweep/56_5_6_none	none	0.05
IndivQLearningTabularSweep/57_5_7	none	True	-10	False	GridWorld	Pentagon	FullObsDiscrete	Individual_Q	1.0	0.05	1000	7	True	IndivQLearningTabularSweep/57_5_7_centralized	centralized	0.05
IndivQLearningTabularSweep/57_5_7	none	True	-10	False	GridWorld	Pentagon	FullObsDiscrete	Individual_Q	1.0	0.05	1000	7	True	IndivQLearningTabularSweep/57_5_7_decentralized	decentralized	0.05
IndivQLearningTabularSweep/57_5_7	none	True	-10	False	GridWorld	Pentagon	FullObsDiscrete	Individual_Q	1.0	0.05	1000	7	True	IndivQLearningTabularSweep/57_5_7_none	none	0.05
IndivQLearningTabularSweep/58_5_8	none	True	-10	False	GridWorld	Pentagon	FullObsDiscrete	Individual_Q	1.0	0.05	1000	8	True	IndivQLearningTabularSweep/58_5_8_centralized	centralized	0.05
IndivQLearningTabularSweep/58_5_8	none	True	-10	False	GridWorld	Pentagon	FullObsDiscrete	Individual_Q	1.0	0.05	1000	8	True	IndivQLearningTabularSweep/58_5_8_decentralized	decentralized	0.05
IndivQLearningTabularSweep/58_5_8	none	True	-10	False	GridWorld	Pentagon	FullObsDiscrete	Individual_Q	1.0	0.05	1000	8	True	IndivQLearningTabularSweep/58_5_8_none	none	0.05
IndivQLearningTabularSweep/59_5_9	none	True	-10	False	GridWorld	Pentagon	FullObsDiscrete	Individual_Q	1.0	0.05	1000	9	True	IndivQLearningTabularSweep/59_5_9_centralized	centralized	0.05
IndivQLearningTabularSweep/59_5_9	none	True	-10	False	GridWorld	Pentagon	FullObsDiscrete	Individual_Q	1.0	0.05	1000	9	True	IndivQLearningTabularSweep/59_5_9_decentralized	decentralized	0.05
IndivQLearningTabularSweep/59_5_9	none	True	-10	False	GridWorld	Pentagon	FullObsDiscrete	Individual_Q	1.0	0.05	1000	9	True	IndivQLearningTabularSweep/59_5_9_none	none	0.05
IndivQLearningTabularSweep/60_6_0	centralized	True	-10	True	GridWorld	ISR	FullObsDiscrete	Individual_Q	1.0	0.05	1000	0	True	IndivQLearningTabularSweep/60_6_0_centralized	centralized	0.05
IndivQLearningTabularSweep/60_6_0	centralized	True	-10	True	GridWorld	ISR	FullObsDiscrete	Individual_Q	1.0	0.05	1000	0	True	IndivQLearningTabularSweep/60_6_0_decentralized	decentralized	0.05
IndivQLearningTabularSweep/60_6_0	centralized	True	-10	True	GridWorld	ISR	FullObsDiscrete	Individual_Q	1.0	0.05	1000	0	True	IndivQLearningTabularSweep/60_6_0_none	none	0.05
IndivQLearningTabularSweep/61_6_1	centralized	True	-10	True	GridWorld	ISR	FullObsDiscrete	Individual_Q	1.0	0.05	1000	1	True	IndivQLearningTabularSweep/61_6_1_centralized	centralized	0.05
IndivQLearningTabularSweep/61_6_1	centralized	True	-10	True	GridWorld	ISR	FullObsDiscrete	Individual_Q	1.0	0.05	1000	1	True	IndivQLearningTabularSweep/61_6_1_decentralized	decentralized	0.05
IndivQLearningTabularSweep/61_6_1	centralized	True	-10	True	GridWorld	ISR	FullObsDiscrete	Individual_Q	1.0	0.05	1000	1	True	IndivQLearningTabularSweep/61_6_1_none	none	0.05
IndivQLearningTabularSweep/62_6_2	centralized	True	-10	True	GridWorld	ISR	FullObsDiscrete	Individual_Q	1.0	0.05	1000	2	True	IndivQLearningTabularSweep/62_6_2_centralized	centralized	0.05
IndivQLearningTabularSweep/62_6_2	centralized	True	-10	True	GridWorld	ISR	FullObsDiscrete	Individual_Q	1.0	0.05	1000	2	True	IndivQLearningTabularSweep/62_6_2_decentralized	decentralized	0.05
IndivQLearningTabularSweep/62_6_2	centralized	True	-10	True	GridWorld	ISR	FullObsDiscrete	Individual_Q	1.0	0.05	1000	2	True	IndivQLearningTabularSweep/62_6_2_none	none	0.05
IndivQLearningTabularSweep/63_6_3	centralized	True	-10	True	GridWorld	ISR	FullObsDiscrete	Individual_Q	1.0	0.05	1000	3	True	IndivQLearningTabularSweep/63_6_3_centralized	centralized	0.05
IndivQLearningTabularSweep/63_6_3	centralized	True	-10	True	GridWorld	ISR	FullObsDiscrete	Individual_Q	1.0	0.05	1000	3	True	IndivQLearningTabularSweep/63_6_3_decentralized	decentralized	0.05
IndivQLearningTabularSweep/63_6_3	centralized	True	-10	True	GridWorld	ISR	FullObsDiscrete	Individual_Q	1.0	0.05	1000	3	True	IndivQLearningTabularSweep/63_6_3_none	none	0.05
IndivQLearningTabularSweep/64_6_4	centralized	True	-10	True	GridWorld	ISR	FullObsDiscrete	Individual_Q	1.0	0.05	1000	4	True	IndivQLearningTabularSweep/64_6_4_centralized	centralized	0.05
IndivQLearningTabularSweep/64_6_4	centralized	True	-10	True	GridWorld	ISR	FullObsDiscrete	Individual_Q	1.0	0.05	1000	4	True	IndivQLearningTabularSweep/64_6_4_decentralized	decentralized	0.05
IndivQLearningTabularSweep/64_6_4	centralized	True	-10	True	GridWorld	ISR	FullObsDiscrete	Individual_Q	1.0	0.05	1000	4	True	IndivQLearningTabularSweep/64_6_4_none	none	0.05
IndivQLearningTabularSweep/65_6_5	centralized	True	-10	True	GridWorld	ISR	FullObsDiscrete	Individual_Q	1.0	0.05	1000	5	True	IndivQLearningTabularSweep/65_6_5_centralized	centralized	0.05
IndivQLearningTabularSweep/65_6_5	centralized	True	-10	True	GridWorld	ISR	FullObsDiscrete	Individual_Q	1.0	0.05	1000	5	True	IndivQLearningTabularSweep/65_6_5_decentralized	decentralized	0.05
IndivQLearningTabularSweep/65_6_5	centralized	True	-10	True	GridWorld	ISR	FullObsDiscrete	Individual_Q	1.0	0.05	1000	5	True	IndivQLearningTabularSweep/65_6_5_none	none	0.05
IndivQLearningTabularSweep/66_6_6	centralized	True	-10	True	GridWorld	ISR	FullObsDiscrete	Individual_Q	1.0	0.05	1000	6	True	IndivQLearningTabularSweep/66_6_6_centralized	centralized	0.05
IndivQLearningTabularSweep/66_6_6	centralized	True	-10	True	GridWorld	ISR	FullObsDiscrete	Individual_Q	1.0	0.05	1000	6	True	IndivQLearningTabularSweep/66_6_6_decentralized	decentralized	0.05
IndivQLearningTabularSweep/66_6_6	centralized	True	-10	True	GridWorld	ISR	FullObsDiscrete	Individual_Q	1.0	0.05	1000	6	True	IndivQLearningTabularSweep/66_6_6_none	none	0.05
IndivQLearningTabularSweep/67_6_7	centralized	True	-10	True	GridWorld	ISR	FullObsDiscrete	Individual_Q	1.0	0.05	1000	7	True	IndivQLearningTabularSweep/67_6_7_centralized	centralized	0.05
IndivQLearningTabularSweep/67_6_7	centralized	True	-10	True	GridWorld	ISR	FullObsDiscrete	Individual_Q	1.0	0.05	1000	7	True	IndivQLearningTabularSweep/67_6_7_decentralized	decentralized	0.05
IndivQLearningTabularSweep/67_6_7	centralized	True	-10	True	GridWorld	ISR	FullObsDiscrete	Individual_Q	1.0	0.05	1000	7	True	IndivQLearningTabularSweep/67_6_7_none	none	0.05
IndivQLearningTabularSweep/68_6_8	centralized	True	-10	True	GridWorld	ISR	FullObsDiscrete	Individual_Q	1.0	0.05	1000	8	True	IndivQLearningTabularSweep/68_6_8_centralized	centralized	0.05
IndivQLearningTabularSweep/68_6_8	centralized	True	-10	True	GridWorld	ISR	FullObsDiscrete	Individual_Q	1.0	0.05	1000	8	True	IndivQLearningTabularSweep/68_6_8_decentralized	decentralized	0.05
IndivQLearningTabularSweep/68_6_8	centralized	True	-10	True	GridWorld	ISR	FullObsDiscrete	Individual_Q	1.0	0.05	1000	8	True	IndivQLearningTabularSweep/68_6_8_none	none	0.05
IndivQLearningTabularSweep/69_6_9	centralized	True	-10	True	GridWorld	ISR	FullObsDiscrete	Individual_Q	1.0	0.05	1000	9	True	IndivQLearningTabularSweep/69_6_9_centralized	centralized	0.05
IndivQLearningTabularSweep/69_6_9	centralized	True	-10	True	GridWorld	ISR	FullObsDiscrete	Individual_Q	1.0	0.05	1000	9	True	IndivQLearningTabularSweep/69_6_9_decentralized	decentralized	0.05
IndivQLearningTabularSweep/69_6_9	centralized	True	-10	True	GridWorld	ISR	FullObsDiscrete	Individual_Q	1.0	0.05	1000	9	True	IndivQLearningTabularSweep/69_6_9_none	none	0.05
IndivQLearningTabularSweep/70_7_0	decentralized	True	-10	True	GridWorld	ISR	FullObsDiscrete	Individual_Q	1.0	0.05	1000	0	True	IndivQLearningTabularSweep/70_7_0_centralized	centralized	0.05
IndivQLearningTabularSweep/70_7_0	decentralized	True	-10	True	GridWorld	ISR	FullObsDiscrete	Individual_Q	1.0	0.05	1000	0	True	IndivQLearningTabularSweep/70_7_0_decentralized	decentralized	0.05
IndivQLearningTabularSweep/70_7_0	decentralized	True	-10	True	GridWorld	ISR	FullObsDiscrete	Individual_Q	1.0	0.05	1000	0	True	IndivQLearningTabularSweep/70_7_0_none	none	0.05
IndivQLearningTabularSweep/71_7_1	decentralized	True	-10	True	GridWorld	ISR	FullObsDiscrete	Individual_Q	1.0	0.05	1000	1	True	IndivQLearningTabularSweep/71_7_1_centralized	centralized	0.05
IndivQLearningTabularSweep/71_7_1	decentralized	True	-10	True	GridWorld	ISR	FullObsDiscrete	Individual_Q	1.0	0.05	1000	1	True	IndivQLearningTabularSweep/71_7_1_decentralized	decentralized	0.05
IndivQLearningTabularSweep/71_7_1	decentralized	True	-10	True	GridWorld	ISR	FullObsDiscrete	Individual_Q	1.0	0.05	1000	1	True	IndivQLearningTabularSweep/71_7_1_none	none	0.05
IndivQLearningTabularSweep/72_7_2	decentralized	True	-10	True	GridWorld	ISR	FullObsDiscrete	Individual_Q	1.0	0.05	1000	2	True	IndivQLearningTabularSweep/72_7_2_centralized	centralized	0.05
IndivQLearningTabularSweep/72_7_2	decentralized	True	-10	True	GridWorld	ISR	FullObsDiscrete	Individual_Q	1.0	0.05	1000	2	True	IndivQLearningTabularSweep/72_7_2_decentralized	decentralized	0.05
IndivQLearningTabularSweep/72_7_2	decentralized	True	-10	True	GridWorld	ISR	FullObsDiscrete	Individual_Q	1.0	0.05	1000	2	True	IndivQLearningTabularSweep/72_7_2_none	none	0.05
IndivQLearningTabularSweep/73_7_3	decentralized	True	-10	True	GridWorld	ISR	FullObsDiscrete	Individual_Q	1.0	0.05	1000	3	True	IndivQLearningTabularSweep/73_7_3_centralized	centralized	0.05
IndivQLearningTabularSweep/73_7_3	decentralized	True	-10	True	GridWorld	ISR	FullObsDiscrete	Individual_Q	1.0	0.05	1000	3	True	IndivQLearningTabularSweep/73_7_3_decentralized	decentralized	0.05
IndivQLearningTabularSweep/73_7_3	decentralized	True	-10	True	GridWorld	ISR	FullObsDiscrete	Individual_Q	1.0	0.05	1000	3	True	IndivQLearningTabularSweep/73_7_3_none	none	0.05
IndivQLearningTabularSweep/74_7_4	decentralized	True	-10	True	GridWorld	ISR	FullObsDiscrete	Individual_Q	1.0	0.05	1000	4	True	IndivQLearningTabularSweep/74_7_4_centralized	centralized	0.05
IndivQLearningTabularSweep/74_7_4	decentralized	True	-10	True	GridWorld	ISR	FullObsDiscrete	Individual_Q	1.0	0.05	1000	4	True	IndivQLearningTabularSweep/74_7_4_decentralized	decentralized	0.05
IndivQLearningTabularSweep/74_7_4	decentralized	True	-10	True	GridWorld	ISR	FullObsDiscrete	Individual_Q	1.0	0.05	1000	4	True	IndivQLearningTabularSweep/74_7_4_none	none	0.05
IndivQLearningTabularSweep/75_7_5	decentralized	True	-10	True	GridWorld	ISR	FullObsDiscrete	Individual_Q	1.0	0.05	1000	5	True	IndivQLearningTabularSweep/75_7_5_centralized	centralized	0.05
IndivQLearningTabularSweep/75_7_5	decentralized	True	-10	True	GridWorld	ISR	FullObsDiscrete	Individual_Q	1.0	0.05	1000	5	True	IndivQLearningTabularSweep/75_7_5_decentralized	decentralized	0.05
IndivQLearningTabularSweep/75_7_5	decentralized	True	-10	True	GridWorld	ISR	FullObsDiscrete	Individual_Q	1.0	0.05	1000	5	True	IndivQLearningTabularSweep/75_7_5_none	none	0.05
IndivQLearningTabularSweep/76_7_6	decentralized	True	-10	True	GridWorld	ISR	FullObsDiscrete	Individual_Q	1.0	0.05	1000	6	True	IndivQLearningTabularSweep/76_7_6_centralized	centralized	0.05
IndivQLearningTabularSweep/76_7_6	decentralized	True	-10	True	GridWorld	ISR	FullObsDiscrete	Individual_Q	1.0	0.05	1000	6	True	IndivQLearningTabularSweep/76_7_6_decentralized	decentralized	0.05
IndivQLearningTabularSweep/76_7_6	decentralized	True	-10	True	GridWorld	ISR	FullObsDiscrete	Individual_Q	1.0	0.05	1000	6	True	IndivQLearningTabularSweep/76_7_6_none	none	0.05
IndivQLearningTabularSweep/77_7_7	decentralized	True	-10	True	GridWorld	ISR	FullObsDiscrete	Individual_Q	1.0	0.05	1000	7	True	IndivQLearningTabularSweep/77_7_7_centralized	centralized	0.05
IndivQLearningTabularSweep/77_7_7	decentralized	True	-10	True	GridWorld	ISR	FullObsDiscrete	Individual_Q	1.0	0.05	1000	7	True	IndivQLearningTabularSweep/77_7_7_decentralized	decentralized	0.05
IndivQLearningTabularSweep/77_7_7	decentralized	True	-10	True	GridWorld	ISR	FullObsDiscrete	Individual_Q	1.0	0.05	1000	7	True	IndivQLearningTabularSweep/77_7_7_none	none	0.05
IndivQLearningTabularSweep/78_7_8	decentralized	True	-10	True	GridWorld	ISR	FullObsDiscrete	Individual_Q	1.0	0.05	1000	8	True	IndivQLearningTabularSweep/78_7_8_centralized	centralized	0.05
IndivQLearningTabularSweep/78_7_8	decentralized	True	-10	True	GridWorld	ISR	FullObsDiscrete	Individual_Q	1.0	0.05	1000	8	True	IndivQLearningTabularSweep/78_7_8_decentralized	decentralized	0.05
IndivQLearningTabularSweep/78_7_8	decentralized	True	-10	True	GridWorld	ISR	FullObsDiscrete	Individual_Q	1.0	0.05	1000	8	True	IndivQLearningTabularSweep/78_7_8_none	none	0.05
IndivQLearningTabularSweep/79_7_9	decentralized	True	-10	True	GridWorld	ISR	FullObsDiscrete	Individual_Q	1.0	0.05	1000	9	True	IndivQLearningTabularSweep/79_7_9_centralized	centralized	0.05
IndivQLearningTabularSweep/79_7_9	decentralized	True	-10	True	GridWorld	ISR	FullObsDiscrete	Individual_Q	1.0	0.05	1000	9	True	IndivQLearningTabularSweep/79_7_9_decentralized	decentralized	0.05
IndivQLearningTabularSweep/79_7_9	decentralized	True	-10	True	GridWorld	ISR	FullObsDiscrete	Individual_Q	1.0	0.05	1000	9	True	IndivQLearningTabularSweep/79_7_9_none	none	0.05
IndivQLearningTabularSweep/80_8_0	none	True	-10	True	GridWorld	ISR	FullObsDiscrete	Individual_Q	1.0	0.05	1000	0	True	IndivQLearningTabularSweep/80_8_0_centralized	centralized	0.05
IndivQLearningTabularSweep/80_8_0	none	True	-10	True	GridWorld	ISR	FullObsDiscrete	Individual_Q	1.0	0.05	1000	0	True	IndivQLearningTabularSweep/80_8_0_decentralized	decentralized	0.05
IndivQLearningTabularSweep/80_8_0	none	True	-10	True	GridWorld	ISR	FullObsDiscrete	Individual_Q	1.0	0.05	1000	0	True	IndivQLearningTabularSweep/80_8_0_none	none	0.05
IndivQLearningTabularSweep/81_8_1	none	True	-10	True	GridWorld	ISR	FullObsDiscrete	Individual_Q	1.0	0.05	1000	1	True	IndivQLearningTabularSweep/81_8_1_centralized	centralized	0.05
IndivQLearningTabularSweep/81_8_1	none	True	-10	True	GridWorld	ISR	FullObsDiscrete	Individual_Q	1.0	0.05	1000	1	True	IndivQLearningTabularSweep/81_8_1_decentralized	decentralized	0.05
IndivQLearningTabularSweep/81_8_1	none	True	-10	True	GridWorld	ISR	FullObsDiscrete	Individual_Q	1.0	0.05	1000	1	True	IndivQLearningTabularSweep/81_8_1_none	none	0.05
IndivQLearningTabularSweep/82_8_2	none	True	-10	True	GridWorld	ISR	FullObsDiscrete	Individual_Q	1.0	0.05	1000	2	True	IndivQLearningTabularSweep/82_8_2_centralized	centralized	0.05
IndivQLearningTabularSweep/82_8_2	none	True	-10	True	GridWorld	ISR	FullObsDiscrete	Individual_Q	1.0	0.05	1000	2	True	IndivQLearningTabularSweep/82_8_2_decentralized	decentralized	0.05
IndivQLearningTabularSweep/82_8_2	none	True	-10	True	GridWorld	ISR	FullObsDiscrete	Individual_Q	1.0	0.05	1000	2	True	IndivQLearningTabularSweep/82_8_2_none	none	0.05
IndivQLearningTabularSweep/83_8_3	none	True	-10	True	GridWorld	ISR	FullObsDiscrete	Individual_Q	1.0	0.05	1000	3	True	IndivQLearningTabularSweep/83_8_3_centralized	centralized	0.05
IndivQLearningTabularSweep/83_8_3	none	True	-10	True	GridWorld	ISR	FullObsDiscrete	Individual_Q	1.0	0.05	1000	3	True	IndivQLearningTabularSweep/83_8_3_decentralized	decentralized	0.05
IndivQLearningTabularSweep/83_8_3	none	True	-10	True	GridWorld	ISR	FullObsDiscrete	Individual_Q	1.0	0.05	1000	3	True	IndivQLearningTabularSweep/83_8_3_none	none	0.05
IndivQLearningTabularSweep/84_8_4	none	True	-10	True	GridWorld	ISR	FullObsDiscrete	Individual_Q	1.0	0.05	1000	4	True	IndivQLearningTabularSweep/84_8_4_centralized	centralized	0.05
IndivQLearningTabularSweep/84_8_4	none	True	-10	True	GridWorld	ISR	FullObsDiscrete	Individual_Q	1.0	0.05	1000	4	True	IndivQLearningTabularSweep/84_8_4_decentralized	decentralized	0.05
IndivQLearningTabularSweep/84_8_4	none	True	-10	True	GridWorld	ISR	FullObsDiscrete	Individual_Q	1.0	0.05	1000	4	True	IndivQLearningTabularSweep/84_8_4_none	none	0.05
IndivQLearningTabularSweep/85_8_5	none	True	-10	True	GridWorld	ISR	FullObsDiscrete	Individual_Q	1.0	0.05	1000	5	True	IndivQLearningTabularSweep/85_8_5_centralized	centralized	0.05
IndivQLearningTabularSweep/85_8_5	none	True	-10	True	GridWorld	ISR	FullObsDiscrete	Individual_Q	1.0	0.05	1000	5	True	IndivQLearningTabularSweep/85_8_5_decentralized	decentralized	0.05
IndivQLearningTabularSweep/85_8_5	none	True	-10	True	GridWorld	ISR	FullObsDiscrete	Individual_Q	1.0	0.05	1000	5	True	IndivQLearningTabularSweep/85_8_5_none	none	0.05
IndivQLearningTabularSweep/86_8_6	none	True	-10	True	GridWorld	ISR	FullObsDiscrete	Individual_Q	1.0	0.05	1000	6	True	IndivQLearningTabularSweep/86_8_6_centralized	centralized	0.05
IndivQLearningTabularSweep/86_8_6	none	True	-10	True	GridWorld	ISR	FullObsDiscrete	Individual_Q	1.0	0.05	1000	6	True	IndivQLearningTabularSweep/86_8_6_decentralized	decentralized	0.05
IndivQLearningTabularSweep/86_8_6	none	True	-10	True	GridWorld	ISR	FullObsDiscrete	Individual_Q	1.0	0.05	1000	6	True	IndivQLearningTabularSweep/86_8_6_none	none	0.05
IndivQLearningTabularSweep/87_8_7	none	True	-10	True	GridWorld	ISR	FullObsDiscrete	Individual_Q	1.0	0.05	1000	7	True	IndivQLearningTabularSweep/87_8_7_centralized	centralized	0.05
IndivQLearningTabularSweep/87_8_7	none	True	-10	True	GridWorld	ISR	FullObsDiscrete	Individual_Q	1.0	0.05	1000	7	True	IndivQLearningTabularSweep/87_8_7_decentralized	decentralized	0.05
IndivQLearningTabularSweep/87_8_7	none	True	-10	True	GridWorld	ISR	FullObsDiscrete	Individual_Q	1.0	0.05	1000	7	True	IndivQLearningTabularSweep/87_8_7_none	none	0.05
IndivQLearningTabularSweep/88_8_8	none	True	-10	True	GridWorld	ISR	FullObsDiscrete	Individual_Q	1.0	0.05	1000	8	True	IndivQLearningTabularSweep/88_8_8_centralized	centralized	0.05
IndivQLearningTabularSweep/88_8_8	none	True	-10	True	GridWorld	ISR	FullObsDiscrete	Individual_Q	1.0	0.05	1000	8	True	IndivQLearningTabularSweep/88_8_8_decentralized	decentralized	0.05
IndivQLearningTabularSweep/88_8_8	none	True	-10	True	GridWorld	ISR	FullObsDiscrete	Individual_Q	1.0	0.05	1000	8	True	IndivQLearningTabularSweep/88_8_8_none	none	0.05
IndivQLearningTabularSweep/89_8_9	none	True	-10	True	GridWorld	ISR	FullObsDiscrete	Individual_Q	1.0	0.05	1000	9	True	IndivQLearningTabularSweep/89_8_9_centralized	centralized	0.05
IndivQLearningTabularSweep/89_8_9	none	True	-10	True	GridWorld	ISR	FullObsDiscrete	Individual_Q	1.0	0.05	1000	9	True	IndivQLearningTabularSweep/89_8_9_decentralized	decentralized	0.05
IndivQLearningTabularSweep/89_8_9	none	True	-10	True	GridWorld	ISR	FullObsDiscrete	Individual_Q	1.0	0.05	1000	9	True	IndivQLearningTabularSweep/89_8_9_none	none	0.05
IndivQLearningTabularSweep/90_9_0	centralized	True	-10	False	GridWorld	ISR	FullObsDiscrete	Individual_Q	1.0	0.05	1000	0	True	IndivQLearningTabularSweep/90_9_0_centralized	centralized	0.05
IndivQLearningTabularSweep/90_9_0	centralized	True	-10	False	GridWorld	ISR	FullObsDiscrete	Individual_Q	1.0	0.05	1000	0	True	IndivQLearningTabularSweep/90_9_0_decentralized	decentralized	0.05
IndivQLearningTabularSweep/90_9_0	centralized	True	-10	False	GridWorld	ISR	FullObsDiscrete	Individual_Q	1.0	0.05	1000	0	True	IndivQLearningTabularSweep/90_9_0_none	none	0.05
IndivQLearningTabularSweep/91_9_1	centralized	True	-10	False	GridWorld	ISR	FullObsDiscrete	Individual_Q	1.0	0.05	1000	1	True	IndivQLearningTabularSweep/91_9_1_centralized	centralized	0.05
IndivQLearningTabularSweep/91_9_1	centralized	True	-10	False	GridWorld	ISR	FullObsDiscrete	Individual_Q	1.0	0.05	1000	1	True	IndivQLearningTabularSweep/91_9_1_decentralized	decentralized	0.05
IndivQLearningTabularSweep/91_9_1	centralized	True	-10	False	GridWorld	ISR	FullObsDiscrete	Individual_Q	1.0	0.05	1000	1	True	IndivQLearningTabularSweep/91_9_1_none	none	0.05
IndivQLearningTabularSweep/92_9_2	centralized	True	-10	False	GridWorld	ISR	FullObsDiscrete	Individual_Q	1.0	0.05	1000	2	True	IndivQLearningTabularSweep/92_9_2_centralized	centralized	0.05
IndivQLearningTabularSweep/92_9_2	centralized	True	-10	False	GridWorld	ISR	FullObsDiscrete	Individual_Q	1.0	0.05	1000	2	True	IndivQLearningTabularSweep/92_9_2_decentralized	decentralized	0.05
IndivQLearningTabularSweep/92_9_2	centralized	True	-10	False	GridWorld	ISR	FullObsDiscrete	Individual_Q	1.0	0.05	1000	2	True	IndivQLearningTabularSweep/92_9_2_none	none	0.05
IndivQLearningTabularSweep/93_9_3	centralized	True	-10	False	GridWorld	ISR	FullObsDiscrete	Individual_Q	1.0	0.05	1000	3	True	IndivQLearningTabularSweep/93_9_3_centralized	centralized	0.05
IndivQLearningTabularSweep/93_9_3	centralized	True	-10	False	GridWorld	ISR	FullObsDiscrete	Individual_Q	1.0	0.05	1000	3	True	IndivQLearningTabularSweep/93_9_3_decentralized	decentralized	0.05
IndivQLearningTabularSweep/93_9_3	centralized	True	-10	False	GridWorld	ISR	FullObsDiscrete	Individual_Q	1.0	0.05	1000	3	True	IndivQLearningTabularSweep/93_9_3_none	none	0.05
IndivQLearningTabularSweep/94_9_4	centralized	True	-10	False	GridWorld	ISR	FullObsDiscrete	Individual_Q	1.0	0.05	1000	4	True	IndivQLearningTabularSweep/94_9_4_centralized	centralized	0.05
IndivQLearningTabularSweep/94_9_4	centralized	True	-10	False	GridWorld	ISR	FullObsDiscrete	Individual_Q	1.0	0.05	1000	4	True	IndivQLearningTabularSweep/94_9_4_decentralized	decentralized	0.05
IndivQLearningTabularSweep/94_9_4	centralized	True	-10	False	GridWorld	ISR	FullObsDiscrete	Individual_Q	1.0	0.05	1000	4	True	IndivQLearningTabularSweep/94_9_4_none	none	0.05
IndivQLearningTabularSweep/95_9_5	centralized	True	-10	False	GridWorld	ISR	FullObsDiscrete	Individual_Q	1.0	0.05	1000	5	True	IndivQLearningTabularSweep/95_9_5_centralized	centralized	0.05
IndivQLearningTabularSweep/95_9_5	centralized	True	-10	False	GridWorld	ISR	FullObsDiscrete	Individual_Q	1.0	0.05	1000	5	True	IndivQLearningTabularSweep/95_9_5_decentralized	decentralized	0.05
IndivQLearningTabularSweep/95_9_5	centralized	True	-10	False	GridWorld	ISR	FullObsDiscrete	Individual_Q	1.0	0.05	1000	5	True	IndivQLearningTabularSweep/95_9_5_none	none	0.05
IndivQLearningTabularSweep/96_9_6	centralized	True	-10	False	GridWorld	ISR	FullObsDiscrete	Individual_Q	1.0	0.05	1000	6	True	IndivQLearningTabularSweep/96_9_6_centralized	centralized	0.05
IndivQLearningTabularSweep/96_9_6	centralized	True	-10	False	GridWorld	ISR	FullObsDiscrete	Individual_Q	1.0	0.05	1000	6	True	IndivQLearningTabularSweep/96_9_6_decentralized	decentralized	0.05
IndivQLearningTabularSweep/96_9_6	centralized	True	-10	False	GridWorld	ISR	FullObsDiscrete	Individual_Q	1.0	0.05	1000	6	True	IndivQLearningTabularSweep/96_9_6_none	none	0.05
IndivQLearningTabularSweep/97_9_7	centralized	True	-10	False	GridWorld	ISR	FullObsDiscrete	Individual_Q	1.0	0.05	1000	7	True	IndivQLearningTabularSweep/97_9_7_centralized	centralized	0.05
IndivQLearningTabularSweep/97_9_7	centralized	True	-10	False	GridWorld	ISR	FullObsDiscrete	Individual_Q	1.0	0.05	1000	7	True	IndivQLearningTabularSweep/97_9_7_decentralized	decentralized	0.05
IndivQLearningTabularSweep/97_9_7	centralized	True	-10	False	GridWorld	ISR	FullObsDiscrete	Individual_Q	1.0	0.05	1000	7	True	IndivQLearningTabularSweep/97_9_7_none	none	0.05
IndivQLearningTabularSweep/98_9_8	centralized	True	-10	False	GridWorld	ISR	FullObsDiscrete	Individual_Q	1.0	0.05	1000	8	True	IndivQLearningTabularSweep/98_9_8_centralized	centralized	0.05
IndivQLearningTabularSweep/98_9_8	centralized	True	-10	False	GridWorld	ISR	FullObsDiscrete	Individual_Q	1.0	0.05	1000	8	True	IndivQLearningTabularSweep/98_9_8_decentralized	decentralized	0.05
IndivQLearningTabularSweep/98_9_8	centralized	True	-10	False	GridWorld	ISR	FullObsDiscrete	Individual_Q	1.0	0.05	1000	8	True	IndivQLearningTabularSweep/98_9_8_none	none	0.05
IndivQLearningTabularSweep/99_9_9	centralized	True	-10	False	GridWorld	ISR	FullObsDiscrete	Individual_Q	1.0	0.05	1000	9	True	IndivQLearningTabularSweep/99_9_9_centralized	centralized	0.05
IndivQLearningTabularSweep/99_9_9	centralized	True	-10	False	GridWorld	ISR	FullObsDiscrete	Individual_Q	1.0	0.05	1000	9	True	IndivQLearningTabularSweep/99_9_9_decentralized	decentralized	0.05
IndivQLearningTabularSweep/99_9_9	centralized	True	-10	False	GridWorld	ISR	FullObsDiscrete	Individual_Q	1.0	0.05	1000	9	True	IndivQLearningTabularSweep/99_9_9_none	none	0.05
IndivQLearningTabularSweep/100_10_0	decentralized	True	-10	False	GridWorld	ISR	FullObsDiscrete	Individual_Q	1.0	0.05	1000	0	True	IndivQLearningTabularSweep/100_10_0_centralized	centralized	0.05
IndivQLearningTabularSweep/100_10_0	decentralized	True	-10	False	GridWorld	ISR	FullObsDiscrete	Individual_Q	1.0	0.05	1000	0	True	IndivQLearningTabularSweep/100_10_0_decentralized	decentralized	0.05
IndivQLearningTabularSweep/100_10_0	decentralized	True	-10	False	GridWorld	ISR	FullObsDiscrete	Individual_Q	1.0	0.05	1000	0	True	IndivQLearningTabularSweep/100_10_0_none	none	0.05
IndivQLearningTabularSweep/101_10_1	decentralized	True	-10	False	GridWorld	ISR	FullObsDiscrete	Individual_Q	1.0	0.05	1000	1	True	IndivQLearningTabularSweep/101_10_1_centralized	centralized	0.05
IndivQLearningTabularSweep/101_10_1	decentralized	True	-10	False	GridWorld	ISR	FullObsDiscrete	Individual_Q	1.0	0.05	1000	1	True	IndivQLearningTabularSweep/101_10_1_decentralized	decentralized	0.05
IndivQLearningTabularSweep/101_10_1	decentralized	True	-10	False	GridWorld	ISR	FullObsDiscrete	Individual_Q	1.0	0.05	1000	1	True	IndivQLearningTabularSweep/101_10_1_none	none	0.05
IndivQLearningTabularSweep/102_10_2	decentralized	True	-10	False	GridWorld	ISR	FullObsDiscrete	Individual_Q	1.0	0.05	1000	2	True	IndivQLearningTabularSweep/102_10_2_centralized	centralized	0.05
IndivQLearningTabularSweep/102_10_2	decentralized	True	-10	False	GridWorld	ISR	FullObsDiscrete	Individual_Q	1.0	0.05	1000	2	True	IndivQLearningTabularSweep/102_10_2_decentralized	decentralized	0.05
IndivQLearningTabularSweep/102_10_2	decentralized	True	-10	False	GridWorld	ISR	FullObsDiscrete	Individual_Q	1.0	0.05	1000	2	True	IndivQLearningTabularSweep/102_10_2_none	none	0.05
IndivQLearningTabularSweep/103_10_3	decentralized	True	-10	False	GridWorld	ISR	FullObsDiscrete	Individual_Q	1.0	0.05	1000	3	True	IndivQLearningTabularSweep/103_10_3_centralized	centralized	0.05
IndivQLearningTabularSweep/103_10_3	decentralized	True	-10	False	GridWorld	ISR	FullObsDiscrete	Individual_Q	1.0	0.05	1000	3	True	IndivQLearningTabularSweep/103_10_3_decentralized	decentralized	0.05
IndivQLearningTabularSweep/103_10_3	decentralized	True	-10	False	GridWorld	ISR	FullObsDiscrete	Individual_Q	1.0	0.05	1000	3	True	IndivQLearningTabularSweep/103_10_3_none	none	0.05
IndivQLearningTabularSweep/104_10_4	decentralized	True	-10	False	GridWorld	ISR	FullObsDiscrete	Individual_Q	1.0	0.05	1000	4	True	IndivQLearningTabularSweep/104_10_4_centralized	centralized	0.05
IndivQLearningTabularSweep/104_10_4	decentralized	True	-10	False	GridWorld	ISR	FullObsDiscrete	Individual_Q	1.0	0.05	1000	4	True	IndivQLearningTabularSweep/104_10_4_decentralized	decentralized	0.05
IndivQLearningTabularSweep/104_10_4	decentralized	True	-10	False	GridWorld	ISR	FullObsDiscrete	Individual_Q	1.0	0.05	1000	4	True	IndivQLearningTabularSweep/104_10_4_none	none	0.05
IndivQLearningTabularSweep/105_10_5	decentralized	True	-10	False	GridWorld	ISR	FullObsDiscrete	Individual_Q	1.0	0.05	1000	5	True	IndivQLearningTabularSweep/105_10_5_centralized	centralized	0.05
IndivQLearningTabularSweep/105_10_5	decentralized	True	-10	False	GridWorld	ISR	FullObsDiscrete	Individual_Q	1.0	0.05	1000	5	True	IndivQLearningTabularSweep/105_10_5_decentralized	decentralized	0.05
IndivQLearningTabularSweep/105_10_5	decentralized	True	-10	False	GridWorld	ISR	FullObsDiscrete	Individual_Q	1.0	0.05	1000	5	True	IndivQLearningTabularSweep/105_10_5_none	none	0.05
IndivQLearningTabularSweep/106_10_6	decentralized	True	-10	False	GridWorld	ISR	FullObsDiscrete	Individual_Q	1.0	0.05	1000	6	True	IndivQLearningTabularSweep/106_10_6_centralized	centralized	0.05
IndivQLearningTabularSweep/106_10_6	decentralized	True	-10	False	GridWorld	ISR	FullObsDiscrete	Individual_Q	1.0	0.05	1000	6	True	IndivQLearningTabularSweep/106_10_6_decentralized	decentralized	0.05
IndivQLearningTabularSweep/106_10_6	decentralized	True	-10	False	GridWorld	ISR	FullObsDiscrete	Individual_Q	1.0	0.05	1000	6	True	IndivQLearningTabularSweep/106_10_6_none	none	0.05
IndivQLearningTabularSweep/107_10_7	decentralized	True	-10	False	GridWorld	ISR	FullObsDiscrete	Individual_Q	1.0	0.05	1000	7	True	IndivQLearningTabularSweep/107_10_7_centralized	centralized	0.05
IndivQLearningTabularSweep/107_10_7	decentralized	True	-10	False	GridWorld	ISR	FullObsDiscrete	Individual_Q	1.0	0.05	1000	7	True	IndivQLearningTabularSweep/107_10_7_decentralized	decentralized	0.05
IndivQLearningTabularSweep/107_10_7	decentralized	True	-10	False	GridWorld	ISR	FullObsDiscrete	Individual_Q	1.0	0.05	1000	7	True	IndivQLearningTabularSweep/107_10_7_none	none	0.05
IndivQLearningTabularSweep/108_10_8	decentralized	True	-10	False	GridWorld	ISR	FullObsDiscrete	Individual_Q	1.0	0.05	1000	8	True	IndivQLearningTabularSweep/108_10_8_centralized	centralized	0.05
IndivQLearningTabularSweep/108_10_8	decentralized	True	-10	False	GridWorld	ISR	FullObsDiscrete	Individual_Q	1.0	0.05	1000	8	True	IndivQLearningTabularSweep/108_10_8_decentralized	decentralized	0.05
IndivQLearningTabularSweep/108_10_8	decentralized	True	-10	False	GridWorld	ISR	FullObsDiscrete	Individual_Q	1.0	0.05	1000	8	True	IndivQLearningTabularSweep/108_10_8_none	none	0.05
IndivQLearningTabularSweep/109_10_9	decentralized	True	-10	False	GridWorld	ISR	FullObsDiscrete	Individual_Q	1.0	0.05	1000	9	True	IndivQLearningTabularSweep/109_10_9_centralized	centralized	0.05
IndivQLearningTabularSweep/109_10_9	decentralized	True	-10	False	GridWorld	ISR	FullObsDiscrete	Individual_Q	1.0	0.05	1000	9	True	IndivQLearningTabularSweep/109_10_9_decentralized	decentralized	0.05
IndivQLearningTabularSweep/109_10_9	decentralized	True	-10	False	GridWorld	ISR	FullObsDiscrete	Individual_Q	1.0	0.05	1000	9	True	IndivQLearningTabularSweep/109_10_9_none	none	0.05
IndivQLearningTabularSweep/110_11_0	none	True	-10	False	GridWorld	ISR	FullObsDiscrete	Individual_Q	1.0	0.05	1000	0	True	IndivQLearningTabularSweep/110_11_0_centralized	centralized	0.05
IndivQLearningTabularSweep/110_11_0	none	True	-10	False	GridWorld	ISR	FullObsDiscrete	Individual_Q	1.0	0.05	1000	0	True	IndivQLearningTabularSweep/110_11_0_decentralized	decentralized	0.05
IndivQLearningTabularSweep/110_11_0	none	True	-10	False	GridWorld	ISR	FullObsDiscrete	Individual_Q	1.0	0.05	1000	0	True	IndivQLearningTabularSweep/110_11_0_none	none	0.05
IndivQLearningTabularSweep/111_11_1	none	True	-10	False	GridWorld	ISR	FullObsDiscrete	Individual_Q	1.0	0.05	1000	1	True	IndivQLearningTabularSweep/111_11_1_centralized	centralized	0.05
IndivQLearningTabularSweep/111_11_1	none	True	-10	False	GridWorld	ISR	FullObsDiscrete	Individual_Q	1.0	0.05	1000	1	True	IndivQLearningTabularSweep/111_11_1_decentralized	decentralized	0.05
IndivQLearningTabularSweep/111_11_1	none	True	-10	False	GridWorld	ISR	FullObsDiscrete	Individual_Q	1.0	0.05	1000	1	True	IndivQLearningTabularSweep/111_11_1_none	none	0.05
IndivQLearningTabularSweep/112_11_2	none	True	-10	False	GridWorld	ISR	FullObsDiscrete	Individual_Q	1.0	0.05	1000	2	True	IndivQLearningTabularSweep/112_11_2_centralized	centralized	0.05
IndivQLearningTabularSweep/112_11_2	none	True	-10	False	GridWorld	ISR	FullObsDiscrete	Individual_Q	1.0	0.05	1000	2	True	IndivQLearningTabularSweep/112_11_2_decentralized	decentralized	0.05
IndivQLearningTabularSweep/112_11_2	none	True	-10	False	GridWorld	ISR	FullObsDiscrete	Individual_Q	1.0	0.05	1000	2	True	IndivQLearningTabularSweep/112_11_2_none	none	0.05
IndivQLearningTabularSweep/113_11_3	none	True	-10	False	GridWorld	ISR	FullObsDiscrete	Individual_Q	1.0	0.05	1000	3	True	IndivQLearningTabularSweep/113_11_3_centralized	centralized	0.05
IndivQLearningTabularSweep/113_11_3	none	True	-10	False	GridWorld	ISR	FullObsDiscrete	Individual_Q	1.0	0.05	1000	3	True	IndivQLearningTabularSweep/113_11_3_decentralized	decentralized	0.05
IndivQLearningTabularSweep/113_11_3	none	True	-10	False	GridWorld	ISR	FullObsDiscrete	Individual_Q	1.0	0.05	1000	3	True	IndivQLearningTabularSweep/113_11_3_none	none	0.05
IndivQLearningTabularSweep/114_11_4	none	True	-10	False	GridWorld	ISR	FullObsDiscrete	Individual_Q	1.0	0.05	1000	4	True	IndivQLearningTabularSweep/114_11_4_centralized	centralized	0.05
IndivQLearningTabularSweep/114_11_4	none	True	-10	False	GridWorld	ISR	FullObsDiscrete	Individual_Q	1.0	0.05	1000	4	True	IndivQLearningTabularSweep/114_11_4_decentralized	decentralized	0.05
IndivQLearningTabularSweep/114_11_4	none	True	-10	False	GridWorld	ISR	FullObsDiscrete	Individual_Q	1.0	0.05	1000	4	True	IndivQLearningTabularSweep/114_11_4_none	none	0.05
IndivQLearningTabularSweep/115_11_5	none	True	-10	False	GridWorld	ISR	FullObsDiscrete	Individual_Q	1.0	0.05	1000	5	True	IndivQLearningTabularSweep/115_11_5_centralized	centralized	0.05
IndivQLearningTabularSweep/115_11_5	none	True	-10	False	GridWorld	ISR	FullObsDiscrete	Individual_Q	1.0	0.05	1000	5	True	IndivQLearningTabularSweep/115_11_5_decentralized	decentralized	0.05
IndivQLearningTabularSweep/115_11_5	none	True	-10	False	GridWorld	ISR	FullObsDiscrete	Individual_Q	1.0	0.05	1000	5	True	IndivQLearningTabularSweep/115_11_5_none	none	0.05
IndivQLearningTabularSweep/116_11_6	none	True	-10	False	GridWorld	ISR	FullObsDiscrete	Individual_Q	1.0	0.05	1000	6	True	IndivQLearningTabularSweep/116_11_6_centralized	centralized	0.05
IndivQLearningTabularSweep/116_11_6	none	True	-10	False	GridWorld	ISR	FullObsDiscrete	Individual_Q	1.0	0.05	1000	6	True	IndivQLearningTabularSweep/116_11_6_decentralized	decentralized	0.05
IndivQLearningTabularSweep/116_11_6	none	True	-10	False	GridWorld	ISR	FullObsDiscrete	Individual_Q	1.0	0.05	1000	6	True	IndivQLearningTabularSweep/116_11_6_none	none	0.05
IndivQLearningTabularSweep/117_11_7	none	True	-10	False	GridWorld	ISR	FullObsDiscrete	Individual_Q	1.0	0.05	1000	7	True	IndivQLearningTabularSweep/117_11_7_centralized	centralized	0.05
IndivQLearningTabularSweep/117_11_7	none	True	-10	False	GridWorld	ISR	FullObsDiscrete	Individual_Q	1.0	0.05	1000	7	True	IndivQLearningTabularSweep/117_11_7_decentralized	decentralized	0.05
IndivQLearningTabularSweep/117_11_7	none	True	-10	False	GridWorld	ISR	FullObsDiscrete	Individual_Q	1.0	0.05	1000	7	True	IndivQLearningTabularSweep/117_11_7_none	none	0.05
IndivQLearningTabularSweep/118_11_8	none	True	-10	False	GridWorld	ISR	FullObsDiscrete	Individual_Q	1.0	0.05	1000	8	True	IndivQLearningTabularSweep/118_11_8_centralized	centralized	0.05
IndivQLearningTabularSweep/118_11_8	none	True	-10	False	GridWorld	ISR	FullObsDiscrete	Individual_Q	1.0	0.05	1000	8	True	IndivQLearningTabularSweep/118_11_8_decentralized	decentralized	0.05
IndivQLearningTabularSweep/118_11_8	none	True	-10	False	GridWorld	ISR	FullObsDiscrete	Individual_Q	1.0	0.05	1000	8	True	IndivQLearningTabularSweep/118_11_8_none	none	0.05
IndivQLearningTabularSweep/119_11_9	none	True	-10	False	GridWorld	ISR	FullObsDiscrete	Individual_Q	1.0	0.05	1000	9	True	IndivQLearningTabularSweep/119_11_9_centralized	centralized	0.05
IndivQLearningTabularSweep/119_11_9	none	True	-10	False	GridWorld	ISR	FullObsDiscrete	Individual_Q	1.0	0.05	1000	9	True	IndivQLearningTabularSweep/119_11_9_decentralized	decentralized	0.05
IndivQLearningTabularSweep/119_11_9	none	True	-10	False	GridWorld	ISR	FullObsDiscrete	Individual_Q	1.0	0.05	1000	9	True	IndivQLearningTabularSweep/119_11_9_none	none	0.05
IndivQLearningTabularSweep/120_12_0	centralized	True	-10	True	GridWorld	SUNY	FullObsDiscrete	Individual_Q	1.0	0.05	1000	0	True	IndivQLearningTabularSweep/120_12_0_centralized	centralized	0.05
IndivQLearningTabularSweep/120_12_0	centralized	True	-10	True	GridWorld	SUNY	FullObsDiscrete	Individual_Q	1.0	0.05	1000	0	True	IndivQLearningTabularSweep/120_12_0_decentralized	decentralized	0.05
IndivQLearningTabularSweep/120_12_0	centralized	True	-10	True	GridWorld	SUNY	FullObsDiscrete	Individual_Q	1.0	0.05	1000	0	True	IndivQLearningTabularSweep/120_12_0_none	none	0.05
IndivQLearningTabularSweep/121_12_1	centralized	True	-10	True	GridWorld	SUNY	FullObsDiscrete	Individual_Q	1.0	0.05	1000	1	True	IndivQLearningTabularSweep/121_12_1_centralized	centralized	0.05
IndivQLearningTabularSweep/121_12_1	centralized	True	-10	True	GridWorld	SUNY	FullObsDiscrete	Individual_Q	1.0	0.05	1000	1	True	IndivQLearningTabularSweep/121_12_1_decentralized	decentralized	0.05
IndivQLearningTabularSweep/121_12_1	centralized	True	-10	True	GridWorld	SUNY	FullObsDiscrete	Individual_Q	1.0	0.05	1000	1	True	IndivQLearningTabularSweep/121_12_1_none	none	0.05
IndivQLearningTabularSweep/122_12_2	centralized	True	-10	True	GridWorld	SUNY	FullObsDiscrete	Individual_Q	1.0	0.05	1000	2	True	IndivQLearningTabularSweep/122_12_2_centralized	centralized	0.05
IndivQLearningTabularSweep/122_12_2	centralized	True	-10	True	GridWorld	SUNY	FullObsDiscrete	Individual_Q	1.0	0.05	1000	2	True	IndivQLearningTabularSweep/122_12_2_decentralized	decentralized	0.05
IndivQLearningTabularSweep/122_12_2	centralized	True	-10	True	GridWorld	SUNY	FullObsDiscrete	Individual_Q	1.0	0.05	1000	2	True	IndivQLearningTabularSweep/122_12_2_none	none	0.05
IndivQLearningTabularSweep/123_12_3	centralized	True	-10	True	GridWorld	SUNY	FullObsDiscrete	Individual_Q	1.0	0.05	1000	3	True	IndivQLearningTabularSweep/123_12_3_centralized	centralized	0.05
IndivQLearningTabularSweep/123_12_3	centralized	True	-10	True	GridWorld	SUNY	FullObsDiscrete	Individual_Q	1.0	0.05	1000	3	True	IndivQLearningTabularSweep/123_12_3_decentralized	decentralized	0.05
IndivQLearningTabularSweep/123_12_3	centralized	True	-10	True	GridWorld	SUNY	FullObsDiscrete	Individual_Q	1.0	0.05	1000	3	True	IndivQLearningTabularSweep/123_12_3_none	none	0.05
IndivQLearningTabularSweep/124_12_4	centralized	True	-10	True	GridWorld	SUNY	FullObsDiscrete	Individual_Q	1.0	0.05	1000	4	True	IndivQLearningTabularSweep/124_12_4_centralized	centralized	0.05
IndivQLearningTabularSweep/124_12_4	centralized	True	-10	True	GridWorld	SUNY	FullObsDiscrete	Individual_Q	1.0	0.05	1000	4	True	IndivQLearningTabularSweep/124_12_4_decentralized	decentralized	0.05
IndivQLearningTabularSweep/124_12_4	centralized	True	-10	True	GridWorld	SUNY	FullObsDiscrete	Individual_Q	1.0	0.05	1000	4	True	IndivQLearningTabularSweep/124_12_4_none	none	0.05
IndivQLearningTabularSweep/125_12_5	centralized	True	-10	True	GridWorld	SUNY	FullObsDiscrete	Individual_Q	1.0	0.05	1000	5	True	IndivQLearningTabularSweep/125_12_5_centralized	centralized	0.05
IndivQLearningTabularSweep/125_12_5	centralized	True	-10	True	GridWorld	SUNY	FullObsDiscrete	Individual_Q	1.0	0.05	1000	5	True	IndivQLearningTabularSweep/125_12_5_decentralized	decentralized	0.05
IndivQLearningTabularSweep/125_12_5	centralized	True	-10	True	GridWorld	SUNY	FullObsDiscrete	Individual_Q	1.0	0.05	1000	5	True	IndivQLearningTabularSweep/125_12_5_none	none	0.05
IndivQLearningTabularSweep/126_12_6	centralized	True	-10	True	GridWorld	SUNY	FullObsDiscrete	Individual_Q	1.0	0.05	1000	6	True	IndivQLearningTabularSweep/126_12_6_centralized	centralized	0.05
IndivQLearningTabularSweep/126_12_6	centralized	True	-10	True	GridWorld	SUNY	FullObsDiscrete	Individual_Q	1.0	0.05	1000	6	True	IndivQLearningTabularSweep/126_12_6_decentralized	decentralized	0.05
IndivQLearningTabularSweep/126_12_6	centralized	True	-10	True	GridWorld	SUNY	FullObsDiscrete	Individual_Q	1.0	0.05	1000	6	True	IndivQLearningTabularSweep/126_12_6_none	none	0.05
IndivQLearningTabularSweep/127_12_7	centralized	True	-10	True	GridWorld	SUNY	FullObsDiscrete	Individual_Q	1.0	0.05	1000	7	True	IndivQLearningTabularSweep/127_12_7_centralized	centralized	0.05
IndivQLearningTabularSweep/127_12_7	centralized	True	-10	True	GridWorld	SUNY	FullObsDiscrete	Individual_Q	1.0	0.05	1000	7	True	IndivQLearningTabularSweep/127_12_7_decentralized	decentralized	0.05
IndivQLearningTabularSweep/127_12_7	centralized	True	-10	True	GridWorld	SUNY	FullObsDiscrete	Individual_Q	1.0	0.05	1000	7	True	IndivQLearningTabularSweep/127_12_7_none	none	0.05
IndivQLearningTabularSweep/128_12_8	centralized	True	-10	True	GridWorld	SUNY	FullObsDiscrete	Individual_Q	1.0	0.05	1000	8	True	IndivQLearningTabularSweep/128_12_8_centralized	centralized	0.05
IndivQLearningTabularSweep/128_12_8	centralized	True	-10	True	GridWorld	SUNY	FullObsDiscrete	Individual_Q	1.0	0.05	1000	8	True	IndivQLearningTabularSweep/128_12_8_decentralized	decentralized	0.05
IndivQLearningTabularSweep/128_12_8	centralized	True	-10	True	GridWorld	SUNY	FullObsDiscrete	Individual_Q	1.0	0.05	1000	8	True	IndivQLearningTabularSweep/128_12_8_none	none	0.05
IndivQLearningTabularSweep/129_12_9	centralized	True	-10	True	GridWorld	SUNY	FullObsDiscrete	Individual_Q	1.0	0.05	1000	9	True	IndivQLearningTabularSweep/129_12_9_centralized	centralized	0.05
IndivQLearningTabularSweep/129_12_9	centralized	True	-10	True	GridWorld	SUNY	FullObsDiscrete	Individual_Q	1.0	0.05	1000	9	True	IndivQLearningTabularSweep/129_12_9_decentralized	decentralized	0.05
IndivQLearningTabularSweep/129_12_9	centralized	True	-10	True	GridWorld	SUNY	FullObsDiscrete	Individual_Q	1.0	0.05	1000	9	True	IndivQLearningTabularSweep/129_12_9_none	none	0.05
IndivQLearningTabularSweep/130_13_0	decentralized	True	-10	True	GridWorld	SUNY	FullObsDiscrete	Individual_Q	1.0	0.05	1000	0	True	IndivQLearningTabularSweep/130_13_0_centralized	centralized	0.05
IndivQLearningTabularSweep/130_13_0	decentralized	True	-10	True	GridWorld	SUNY	FullObsDiscrete	Individual_Q	1.0	0.05	1000	0	True	IndivQLearningTabularSweep/130_13_0_decentralized	decentralized	0.05
IndivQLearningTabularSweep/130_13_0	decentralized	True	-10	True	GridWorld	SUNY	FullObsDiscrete	Individual_Q	1.0	0.05	1000	0	True	IndivQLearningTabularSweep/130_13_0_none	none	0.05
IndivQLearningTabularSweep/131_13_1	decentralized	True	-10	True	GridWorld	SUNY	FullObsDiscrete	Individual_Q	1.0	0.05	1000	1	True	IndivQLearningTabularSweep/131_13_1_centralized	centralized	0.05
IndivQLearningTabularSweep/131_13_1	decentralized	True	-10	True	GridWorld	SUNY	FullObsDiscrete	Individual_Q	1.0	0.05	1000	1	True	IndivQLearningTabularSweep/131_13_1_decentralized	decentralized	0.05
IndivQLearningTabularSweep/131_13_1	decentralized	True	-10	True	GridWorld	SUNY	FullObsDiscrete	Individual_Q	1.0	0.05	1000	1	True	IndivQLearningTabularSweep/131_13_1_none	none	0.05
IndivQLearningTabularSweep/132_13_2	decentralized	True	-10	True	GridWorld	SUNY	FullObsDiscrete	Individual_Q	1.0	0.05	1000	2	True	IndivQLearningTabularSweep/132_13_2_centralized	centralized	0.05
IndivQLearningTabularSweep/132_13_2	decentralized	True	-10	True	GridWorld	SUNY	FullObsDiscrete	Individual_Q	1.0	0.05	1000	2	True	IndivQLearningTabularSweep/132_13_2_decentralized	decentralized	0.05
IndivQLearningTabularSweep/132_13_2	decentralized	True	-10	True	GridWorld	SUNY	FullObsDiscrete	Individual_Q	1.0	0.05	1000	2	True	IndivQLearningTabularSweep/132_13_2_none	none	0.05
IndivQLearningTabularSweep/133_13_3	decentralized	True	-10	True	GridWorld	SUNY	FullObsDiscrete	Individual_Q	1.0	0.05	1000	3	True	IndivQLearningTabularSweep/133_13_3_centralized	centralized	0.05
IndivQLearningTabularSweep/133_13_3	decentralized	True	-10	True	GridWorld	SUNY	FullObsDiscrete	Individual_Q	1.0	0.05	1000	3	True	IndivQLearningTabularSweep/133_13_3_decentralized	decentralized	0.05
IndivQLearningTabularSweep/133_13_3	decentralized	True	-10	True	GridWorld	SUNY	FullObsDiscrete	Individual_Q	1.0	0.05	1000	3	True	IndivQLearningTabularSweep/133_13_3_none	none	0.05
IndivQLearningTabularSweep/134_13_4	decentralized	True	-10	True	GridWorld	SUNY	FullObsDiscrete	Individual_Q	1.0	0.05	1000	4	True	IndivQLearningTabularSweep/134_13_4_centralized	centralized	0.05
IndivQLearningTabularSweep/134_13_4	decentralized	True	-10	True	GridWorld	SUNY	FullObsDiscrete	Individual_Q	1.0	0.05	1000	4	True	IndivQLearningTabularSweep/134_13_4_decentralized	decentralized	0.05
IndivQLearningTabularSweep/134_13_4	decentralized	True	-10	True	GridWorld	SUNY	FullObsDiscrete	Individual_Q	1.0	0.05	1000	4	True	IndivQLearningTabularSweep/134_13_4_none	none	0.05
IndivQLearningTabularSweep/135_13_5	decentralized	True	-10	True	GridWorld	SUNY	FullObsDiscrete	Individual_Q	1.0	0.05	1000	5	True	IndivQLearningTabularSweep/135_13_5_centralized	centralized	0.05
IndivQLearningTabularSweep/135_13_5	decentralized	True	-10	True	GridWorld	SUNY	FullObsDiscrete	Individual_Q	1.0	0.05	1000	5	True	IndivQLearningTabularSweep/135_13_5_decentralized	decentralized	0.05
IndivQLearningTabularSweep/135_13_5	decentralized	True	-10	True	GridWorld	SUNY	FullObsDiscrete	Individual_Q	1.0	0.05	1000	5	True	IndivQLearningTabularSweep/135_13_5_none	none	0.05
IndivQLearningTabularSweep/136_13_6	decentralized	True	-10	True	GridWorld	SUNY	FullObsDiscrete	Individual_Q	1.0	0.05	1000	6	True	IndivQLearningTabularSweep/136_13_6_centralized	centralized	0.05
IndivQLearningTabularSweep/136_13_6	decentralized	True	-10	True	GridWorld	SUNY	FullObsDiscrete	Individual_Q	1.0	0.05	1000	6	True	IndivQLearningTabularSweep/136_13_6_decentralized	decentralized	0.05
IndivQLearningTabularSweep/136_13_6	decentralized	True	-10	True	GridWorld	SUNY	FullObsDiscrete	Individual_Q	1.0	0.05	1000	6	True	IndivQLearningTabularSweep/136_13_6_none	none	0.05
IndivQLearningTabularSweep/137_13_7	decentralized	True	-10	True	GridWorld	SUNY	FullObsDiscrete	Individual_Q	1.0	0.05	1000	7	True	IndivQLearningTabularSweep/137_13_7_centralized	centralized	0.05
IndivQLearningTabularSweep/137_13_7	decentralized	True	-10	True	GridWorld	SUNY	FullObsDiscrete	Individual_Q	1.0	0.05	1000	7	True	IndivQLearningTabularSweep/137_13_7_decentralized	decentralized	0.05
IndivQLearningTabularSweep/137_13_7	decentralized	True	-10	True	GridWorld	SUNY	FullObsDiscrete	Individual_Q	1.0	0.05	1000	7	True	IndivQLearningTabularSweep/137_13_7_none	none	0.05
IndivQLearningTabularSweep/138_13_8	decentralized	True	-10	True	GridWorld	SUNY	FullObsDiscrete	Individual_Q	1.0	0.05	1000	8	True	IndivQLearningTabularSweep/138_13_8_centralized	centralized	0.05
IndivQLearningTabularSweep/138_13_8	decentralized	True	-10	True	GridWorld	SUNY	FullObsDiscrete	Individual_Q	1.0	0.05	1000	8	True	IndivQLearningTabularSweep/138_13_8_decentralized	decentralized	0.05
IndivQLearningTabularSweep/138_13_8	decentralized	True	-10	True	GridWorld	SUNY	FullObsDiscrete	Individual_Q	1.0	0.05	1000	8	True	IndivQLearningTabularSweep/138_13_8_none	none	0.05
IndivQLearningTabularSweep/139_13_9	decentralized	True	-10	True	GridWorld	SUNY	FullObsDiscrete	Individual_Q	1.0	0.05	1000	9	True	IndivQLearningTabularSweep/139_13_9_centralized	centralized	0.05
IndivQLearningTabularSweep/139_13_9	decentralized	True	-10	True	GridWorld	SUNY	FullObsDiscrete	Individual_Q	1.0	0.05	1000	9	True	IndivQLearningTabularSweep/139_13_9_decentralized	decentralized	0.05
IndivQLearningTabularSweep/139_13_9	decentralized	True	-10	True	GridWorld	SUNY	FullObsDiscrete	Individual_Q	1.0	0.05	1000	9	True	IndivQLearningTabularSweep/139_13_9_none	none	0.05
IndivQLearningTabularSweep/140_14_0	none	True	-10	True	GridWorld	SUNY	FullObsDiscrete	Individual_Q	1.0	0.05	1000	0	True	IndivQLearningTabularSweep/140_14_0_centralized	centralized	0.05
IndivQLearningTabularSweep/140_14_0	none	True	-10	True	GridWorld	SUNY	FullObsDiscrete	Individual_Q	1.0	0.05	1000	0	True	IndivQLearningTabularSweep/140_14_0_decentralized	decentralized	0.05
IndivQLearningTabularSweep/140_14_0	none	True	-10	True	GridWorld	SUNY	FullObsDiscrete	Individual_Q	1.0	0.05	1000	0	True	IndivQLearningTabularSweep/140_14_0_none	none	0.05
IndivQLearningTabularSweep/141_14_1	none	True	-10	True	GridWorld	SUNY	FullObsDiscrete	Individual_Q	1.0	0.05	1000	1	True	IndivQLearningTabularSweep/141_14_1_centralized	centralized	0.05
IndivQLearningTabularSweep/141_14_1	none	True	-10	True	GridWorld	SUNY	FullObsDiscrete	Individual_Q	1.0	0.05	1000	1	True	IndivQLearningTabularSweep/141_14_1_decentralized	decentralized	0.05
IndivQLearningTabularSweep/141_14_1	none	True	-10	True	GridWorld	SUNY	FullObsDiscrete	Individual_Q	1.0	0.05	1000	1	True	IndivQLearningTabularSweep/141_14_1_none	none	0.05
IndivQLearningTabularSweep/142_14_2	none	True	-10	True	GridWorld	SUNY	FullObsDiscrete	Individual_Q	1.0	0.05	1000	2	True	IndivQLearningTabularSweep/142_14_2_centralized	centralized	0.05
IndivQLearningTabularSweep/142_14_2	none	True	-10	True	GridWorld	SUNY	FullObsDiscrete	Individual_Q	1.0	0.05	1000	2	True	IndivQLearningTabularSweep/142_14_2_decentralized	decentralized	0.05
IndivQLearningTabularSweep/142_14_2	none	True	-10	True	GridWorld	SUNY	FullObsDiscrete	Individual_Q	1.0	0.05	1000	2	True	IndivQLearningTabularSweep/142_14_2_none	none	0.05
IndivQLearningTabularSweep/143_14_3	none	True	-10	True	GridWorld	SUNY	FullObsDiscrete	Individual_Q	1.0	0.05	1000	3	True	IndivQLearningTabularSweep/143_14_3_centralized	centralized	0.05
IndivQLearningTabularSweep/143_14_3	none	True	-10	True	GridWorld	SUNY	FullObsDiscrete	Individual_Q	1.0	0.05	1000	3	True	IndivQLearningTabularSweep/143_14_3_decentralized	decentralized	0.05
IndivQLearningTabularSweep/143_14_3	none	True	-10	True	GridWorld	SUNY	FullObsDiscrete	Individual_Q	1.0	0.05	1000	3	True	IndivQLearningTabularSweep/143_14_3_none	none	0.05
IndivQLearningTabularSweep/144_14_4	none	True	-10	True	GridWorld	SUNY	FullObsDiscrete	Individual_Q	1.0	0.05	1000	4	True	IndivQLearningTabularSweep/144_14_4_centralized	centralized	0.05
IndivQLearningTabularSweep/144_14_4	none	True	-10	True	GridWorld	SUNY	FullObsDiscrete	Individual_Q	1.0	0.05	1000	4	True	IndivQLearningTabularSweep/144_14_4_decentralized	decentralized	0.05
IndivQLearningTabularSweep/144_14_4	none	True	-10	True	GridWorld	SUNY	FullObsDiscrete	Individual_Q	1.0	0.05	1000	4	True	IndivQLearningTabularSweep/144_14_4_none	none	0.05
IndivQLearningTabularSweep/145_14_5	none	True	-10	True	GridWorld	SUNY	FullObsDiscrete	Individual_Q	1.0	0.05	1000	5	True	IndivQLearningTabularSweep/145_14_5_centralized	centralized	0.05
IndivQLearningTabularSweep/145_14_5	none	True	-10	True	GridWorld	SUNY	FullObsDiscrete	Individual_Q	1.0	0.05	1000	5	True	IndivQLearningTabularSweep/145_14_5_decentralized	decentralized	0.05
IndivQLearningTabularSweep/145_14_5	none	True	-10	True	GridWorld	SUNY	FullObsDiscrete	Individual_Q	1.0	0.05	1000	5	True	IndivQLearningTabularSweep/145_14_5_none	none	0.05
IndivQLearningTabularSweep/146_14_6	none	True	-10	True	GridWorld	SUNY	FullObsDiscrete	Individual_Q	1.0	0.05	1000	6	True	IndivQLearningTabularSweep/146_14_6_centralized	centralized	0.05
IndivQLearningTabularSweep/146_14_6	none	True	-10	True	GridWorld	SUNY	FullObsDiscrete	Individual_Q	1.0	0.05	1000	6	True	IndivQLearningTabularSweep/146_14_6_decentralized	decentralized	0.05
IndivQLearningTabularSweep/146_14_6	none	True	-10	True	GridWorld	SUNY	FullObsDiscrete	Individual_Q	1.0	0.05	1000	6	True	IndivQLearningTabularSweep/146_14_6_none	none	0.05
IndivQLearningTabularSweep/147_14_7	none	True	-10	True	GridWorld	SUNY	FullObsDiscrete	Individual_Q	1.0	0.05	1000	7	True	IndivQLearningTabularSweep/147_14_7_centralized	centralized	0.05
IndivQLearningTabularSweep/147_14_7	none	True	-10	True	GridWorld	SUNY	FullObsDiscrete	Individual_Q	1.0	0.05	1000	7	True	IndivQLearningTabularSweep/147_14_7_decentralized	decentralized	0.05
IndivQLearningTabularSweep/147_14_7	none	True	-10	True	GridWorld	SUNY	FullObsDiscrete	Individual_Q	1.0	0.05	1000	7	True	IndivQLearningTabularSweep/147_14_7_none	none	0.05
IndivQLearningTabularSweep/148_14_8	none	True	-10	True	GridWorld	SUNY	FullObsDiscrete	Individual_Q	1.0	0.05	1000	8	True	IndivQLearningTabularSweep/148_14_8_centralized	centralized	0.05
IndivQLearningTabularSweep/148_14_8	none	True	-10	True	GridWorld	SUNY	FullObsDiscrete	Individual_Q	1.0	0.05	1000	8	True	IndivQLearningTabularSweep/148_14_8_decentralized	decentralized	0.05
IndivQLearningTabularSweep/148_14_8	none	True	-10	True	GridWorld	SUNY	FullObsDiscrete	Individual_Q	1.0	0.05	1000	8	True	IndivQLearningTabularSweep/148_14_8_none	none	0.05
IndivQLearningTabularSweep/149_14_9	none	True	-10	True	GridWorld	SUNY	FullObsDiscrete	Individual_Q	1.0	0.05	1000	9	True	IndivQLearningTabularSweep/149_14_9_centralized	centralized	0.05
IndivQLearningTabularSweep/149_14_9	none	True	-10	True	GridWorld	SUNY	FullObsDiscrete	Individual_Q	1.0	0.05	1000	9	True	IndivQLearningTabularSweep/149_14_9_decentralized	decentralized	0.05
IndivQLearningTabularSweep/149_14_9	none	True	-10	True	GridWorld	SUNY	FullObsDiscrete	Individual_Q	1.0	0.05	1000	9	True	IndivQLearningTabularSweep/149_14_9_none	none	0.05
IndivQLearningTabularSweep/150_15_0	centralized	True	-10	False	GridWorld	SUNY	FullObsDiscrete	Individual_Q	1.0	0.05	1000	0	True	IndivQLearningTabularSweep/150_15_0_centralized	centralized	0.05
IndivQLearningTabularSweep/150_15_0	centralized	True	-10	False	GridWorld	SUNY	FullObsDiscrete	Individual_Q	1.0	0.05	1000	0	True	IndivQLearningTabularSweep/150_15_0_decentralized	decentralized	0.05
IndivQLearningTabularSweep/150_15_0	centralized	True	-10	False	GridWorld	SUNY	FullObsDiscrete	Individual_Q	1.0	0.05	1000	0	True	IndivQLearningTabularSweep/150_15_0_none	none	0.05
IndivQLearningTabularSweep/151_15_1	centralized	True	-10	False	GridWorld	SUNY	FullObsDiscrete	Individual_Q	1.0	0.05	1000	1	True	IndivQLearningTabularSweep/151_15_1_centralized	centralized	0.05
IndivQLearningTabularSweep/151_15_1	centralized	True	-10	False	GridWorld	SUNY	FullObsDiscrete	Individual_Q	1.0	0.05	1000	1	True	IndivQLearningTabularSweep/151_15_1_decentralized	decentralized	0.05
IndivQLearningTabularSweep/151_15_1	centralized	True	-10	False	GridWorld	SUNY	FullObsDiscrete	Individual_Q	1.0	0.05	1000	1	True	IndivQLearningTabularSweep/151_15_1_none	none	0.05
IndivQLearningTabularSweep/152_15_2	centralized	True	-10	False	GridWorld	SUNY	FullObsDiscrete	Individual_Q	1.0	0.05	1000	2	True	IndivQLearningTabularSweep/152_15_2_centralized	centralized	0.05
IndivQLearningTabularSweep/152_15_2	centralized	True	-10	False	GridWorld	SUNY	FullObsDiscrete	Individual_Q	1.0	0.05	1000	2	True	IndivQLearningTabularSweep/152_15_2_decentralized	decentralized	0.05
IndivQLearningTabularSweep/152_15_2	centralized	True	-10	False	GridWorld	SUNY	FullObsDiscrete	Individual_Q	1.0	0.05	1000	2	True	IndivQLearningTabularSweep/152_15_2_none	none	0.05
IndivQLearningTabularSweep/153_15_3	centralized	True	-10	False	GridWorld	SUNY	FullObsDiscrete	Individual_Q	1.0	0.05	1000	3	True	IndivQLearningTabularSweep/153_15_3_centralized	centralized	0.05
IndivQLearningTabularSweep/153_15_3	centralized	True	-10	False	GridWorld	SUNY	FullObsDiscrete	Individual_Q	1.0	0.05	1000	3	True	IndivQLearningTabularSweep/153_15_3_decentralized	decentralized	0.05
IndivQLearningTabularSweep/153_15_3	centralized	True	-10	False	GridWorld	SUNY	FullObsDiscrete	Individual_Q	1.0	0.05	1000	3	True	IndivQLearningTabularSweep/153_15_3_none	none	0.05
IndivQLearningTabularSweep/154_15_4	centralized	True	-10	False	GridWorld	SUNY	FullObsDiscrete	Individual_Q	1.0	0.05	1000	4	True	IndivQLearningTabularSweep/154_15_4_centralized	centralized	0.05
IndivQLearningTabularSweep/154_15_4	centralized	True	-10	False	GridWorld	SUNY	FullObsDiscrete	Individual_Q	1.0	0.05	1000	4	True	IndivQLearningTabularSweep/154_15_4_decentralized	decentralized	0.05
IndivQLearningTabularSweep/154_15_4	centralized	True	-10	False	GridWorld	SUNY	FullObsDiscrete	Individual_Q	1.0	0.05	1000	4	True	IndivQLearningTabularSweep/154_15_4_none	none	0.05
IndivQLearningTabularSweep/155_15_5	centralized	True	-10	False	GridWorld	SUNY	FullObsDiscrete	Individual_Q	1.0	0.05	1000	5	True	IndivQLearningTabularSweep/155_15_5_centralized	centralized	0.05
IndivQLearningTabularSweep/155_15_5	centralized	True	-10	False	GridWorld	SUNY	FullObsDiscrete	Individual_Q	1.0	0.05	1000	5	True	IndivQLearningTabularSweep/155_15_5_decentralized	decentralized	0.05
IndivQLearningTabularSweep/155_15_5	centralized	True	-10	False	GridWorld	SUNY	FullObsDiscrete	Individual_Q	1.0	0.05	1000	5	True	IndivQLearningTabularSweep/155_15_5_none	none	0.05
IndivQLearningTabularSweep/156_15_6	centralized	True	-10	False	GridWorld	SUNY	FullObsDiscrete	Individual_Q	1.0	0.05	1000	6	True	IndivQLearningTabularSweep/156_15_6_centralized	centralized	0.05
IndivQLearningTabularSweep/156_15_6	centralized	True	-10	False	GridWorld	SUNY	FullObsDiscrete	Individual_Q	1.0	0.05	1000	6	True	IndivQLearningTabularSweep/156_15_6_decentralized	decentralized	0.05
IndivQLearningTabularSweep/156_15_6	centralized	True	-10	False	GridWorld	SUNY	FullObsDiscrete	Individual_Q	1.0	0.05	1000	6	True	IndivQLearningTabularSweep/156_15_6_none	none	0.05
IndivQLearningTabularSweep/157_15_7	centralized	True	-10	False	GridWorld	SUNY	FullObsDiscrete	Individual_Q	1.0	0.05	1000	7	True	IndivQLearningTabularSweep/157_15_7_centralized	centralized	0.05
IndivQLearningTabularSweep/157_15_7	centralized	True	-10	False	GridWorld	SUNY	FullObsDiscrete	Individual_Q	1.0	0.05	1000	7	True	IndivQLearningTabularSweep/157_15_7_decentralized	decentralized	0.05
IndivQLearningTabularSweep/157_15_7	centralized	True	-10	False	GridWorld	SUNY	FullObsDiscrete	Individual_Q	1.0	0.05	1000	7	True	IndivQLearningTabularSweep/157_15_7_none	none	0.05
IndivQLearningTabularSweep/158_15_8	centralized	True	-10	False	GridWorld	SUNY	FullObsDiscrete	Individual_Q	1.0	0.05	1000	8	True	IndivQLearningTabularSweep/158_15_8_centralized	centralized	0.05
IndivQLearningTabularSweep/158_15_8	centralized	True	-10	False	GridWorld	SUNY	FullObsDiscrete	Individual_Q	1.0	0.05	1000	8	True	IndivQLearningTabularSweep/158_15_8_decentralized	decentralized	0.05
IndivQLearningTabularSweep/158_15_8	centralized	True	-10	False	GridWorld	SUNY	FullObsDiscrete	Individual_Q	1.0	0.05	1000	8	True	IndivQLearningTabularSweep/158_15_8_none	none	0.05
IndivQLearningTabularSweep/159_15_9	centralized	True	-10	False	GridWorld	SUNY	FullObsDiscrete	Individual_Q	1.0	0.05	1000	9	True	IndivQLearningTabularSweep/159_15_9_centralized	centralized	0.05
IndivQLearningTabularSweep/159_15_9	centralized	True	-10	False	GridWorld	SUNY	FullObsDiscrete	Individual_Q	1.0	0.05	1000	9	True	IndivQLearningTabularSweep/159_15_9_decentralized	decentralized	0.05
IndivQLearningTabularSweep/159_15_9	centralized	True	-10	False	GridWorld	SUNY	FullObsDiscrete	Individual_Q	1.0	0.05	1000	9	True	IndivQLearningTabularSweep/159_15_9_none	none	0.05
IndivQLearningTabularSweep/160_16_0	decentralized	True	-10	False	GridWorld	SUNY	FullObsDiscrete	Individual_Q	1.0	0.05	1000	0	True	IndivQLearningTabularSweep/160_16_0_centralized	centralized	0.05
IndivQLearningTabularSweep/160_16_0	decentralized	True	-10	False	GridWorld	SUNY	FullObsDiscrete	Individual_Q	1.0	0.05	1000	0	True	IndivQLearningTabularSweep/160_16_0_decentralized	decentralized	0.05
IndivQLearningTabularSweep/160_16_0	decentralized	True	-10	False	GridWorld	SUNY	FullObsDiscrete	Individual_Q	1.0	0.05	1000	0	True	IndivQLearningTabularSweep/160_16_0_none	none	0.05
IndivQLearningTabularSweep/161_16_1	decentralized	True	-10	False	GridWorld	SUNY	FullObsDiscrete	Individual_Q	1.0	0.05	1000	1	True	IndivQLearningTabularSweep/161_16_1_centralized	centralized	0.05
IndivQLearningTabularSweep/161_16_1	decentralized	True	-10	False	GridWorld	SUNY	FullObsDiscrete	Individual_Q	1.0	0.05	1000	1	True	IndivQLearningTabularSweep/161_16_1_decentralized	decentralized	0.05
IndivQLearningTabularSweep/161_16_1	decentralized	True	-10	False	GridWorld	SUNY	FullObsDiscrete	Individual_Q	1.0	0.05	1000	1	True	IndivQLearningTabularSweep/161_16_1_none	none	0.05
IndivQLearningTabularSweep/162_16_2	decentralized	True	-10	False	GridWorld	SUNY	FullObsDiscrete	Individual_Q	1.0	0.05	1000	2	True	IndivQLearningTabularSweep/162_16_2_centralized	centralized	0.05
IndivQLearningTabularSweep/162_16_2	decentralized	True	-10	False	GridWorld	SUNY	FullObsDiscrete	Individual_Q	1.0	0.05	1000	2	True	IndivQLearningTabularSweep/162_16_2_decentralized	decentralized	0.05
IndivQLearningTabularSweep/162_16_2	decentralized	True	-10	False	GridWorld	SUNY	FullObsDiscrete	Individual_Q	1.0	0.05	1000	2	True	IndivQLearningTabularSweep/162_16_2_none	none	0.05
IndivQLearningTabularSweep/163_16_3	decentralized	True	-10	False	GridWorld	SUNY	FullObsDiscrete	Individual_Q	1.0	0.05	1000	3	True	IndivQLearningTabularSweep/163_16_3_centralized	centralized	0.05
IndivQLearningTabularSweep/163_16_3	decentralized	True	-10	False	GridWorld	SUNY	FullObsDiscrete	Individual_Q	1.0	0.05	1000	3	True	IndivQLearningTabularSweep/163_16_3_decentralized	decentralized	0.05
IndivQLearningTabularSweep/163_16_3	decentralized	True	-10	False	GridWorld	SUNY	FullObsDiscrete	Individual_Q	1.0	0.05	1000	3	True	IndivQLearningTabularSweep/163_16_3_none	none	0.05
IndivQLearningTabularSweep/164_16_4	decentralized	True	-10	False	GridWorld	SUNY	FullObsDiscrete	Individual_Q	1.0	0.05	1000	4	True	IndivQLearningTabularSweep/164_16_4_centralized	centralized	0.05
IndivQLearningTabularSweep/164_16_4	decentralized	True	-10	False	GridWorld	SUNY	FullObsDiscrete	Individual_Q	1.0	0.05	1000	4	True	IndivQLearningTabularSweep/164_16_4_decentralized	decentralized	0.05
IndivQLearningTabularSweep/164_16_4	decentralized	True	-10	False	GridWorld	SUNY	FullObsDiscrete	Individual_Q	1.0	0.05	1000	4	True	IndivQLearningTabularSweep/164_16_4_none	none	0.05
IndivQLearningTabularSweep/165_16_5	decentralized	True	-10	False	GridWorld	SUNY	FullObsDiscrete	Individual_Q	1.0	0.05	1000	5	True	IndivQLearningTabularSweep/165_16_5_centralized	centralized	0.05
IndivQLearningTabularSweep/165_16_5	decentralized	True	-10	False	GridWorld	SUNY	FullObsDiscrete	Individual_Q	1.0	0.05	1000	5	True	IndivQLearningTabularSweep/165_16_5_decentralized	decentralized	0.05
IndivQLearningTabularSweep/165_16_5	decentralized	True	-10	False	GridWorld	SUNY	FullObsDiscrete	Individual_Q	1.0	0.05	1000	5	True	IndivQLearningTabularSweep/165_16_5_none	none	0.05
IndivQLearningTabularSweep/166_16_6	decentralized	True	-10	False	GridWorld	SUNY	FullObsDiscrete	Individual_Q	1.0	0.05	1000	6	True	IndivQLearningTabularSweep/166_16_6_centralized	centralized	0.05
IndivQLearningTabularSweep/166_16_6	decentralized	True	-10	False	GridWorld	SUNY	FullObsDiscrete	Individual_Q	1.0	0.05	1000	6	True	IndivQLearningTabularSweep/166_16_6_decentralized	decentralized	0.05
IndivQLearningTabularSweep/166_16_6	decentralized	True	-10	False	GridWorld	SUNY	FullObsDiscrete	Individual_Q	1.0	0.05	1000	6	True	IndivQLearningTabularSweep/166_16_6_none	none	0.05
IndivQLearningTabularSweep/167_16_7	decentralized	True	-10	False	GridWorld	SUNY	FullObsDiscrete	Individual_Q	1.0	0.05	1000	7	True	IndivQLearningTabularSweep/167_16_7_centralized	centralized	0.05
IndivQLearningTabularSweep/167_16_7	decentralized	True	-10	False	GridWorld	SUNY	FullObsDiscrete	Individual_Q	1.0	0.05	1000	7	True	IndivQLearningTabularSweep/167_16_7_decentralized	decentralized	0.05
IndivQLearningTabularSweep/167_16_7	decentralized	True	-10	False	GridWorld	SUNY	FullObsDiscrete	Individual_Q	1.0	0.05	1000	7	True	IndivQLearningTabularSweep/167_16_7_none	none	0.05
IndivQLearningTabularSweep/168_16_8	decentralized	True	-10	False	GridWorld	SUNY	FullObsDiscrete	Individual_Q	1.0	0.05	1000	8	True	IndivQLearningTabularSweep/168_16_8_centralized	centralized	0.05
IndivQLearningTabularSweep/168_16_8	decentralized	True	-10	False	GridWorld	SUNY	FullObsDiscrete	Individual_Q	1.0	0.05	1000	8	True	IndivQLearningTabularSweep/168_16_8_decentralized	decentralized	0.05
IndivQLearningTabularSweep/168_16_8	decentralized	True	-10	False	GridWorld	SUNY	FullObsDiscrete	Individual_Q	1.0	0.05	1000	8	True	IndivQLearningTabularSweep/168_16_8_none	none	0.05
IndivQLearningTabularSweep/169_16_9	decentralized	True	-10	False	GridWorld	SUNY	FullObsDiscrete	Individual_Q	1.0	0.05	1000	9	True	IndivQLearningTabularSweep/169_16_9_centralized	centralized	0.05
IndivQLearningTabularSweep/169_16_9	decentralized	True	-10	False	GridWorld	SUNY	FullObsDiscrete	Individual_Q	1.0	0.05	1000	9	True	IndivQLearningTabularSweep/169_16_9_decentralized	decentralized	0.05
IndivQLearningTabularSweep/169_16_9	decentralized	True	-10	False	GridWorld	SUNY	FullObsDiscrete	Individual_Q	1.0	0.05	1000	9	True	IndivQLearningTabularSweep/169_16_9_none	none	0.05
IndivQLearningTabularSweep/170_17_0	none	True	-10	False	GridWorld	SUNY	FullObsDiscrete	Individual_Q	1.0	0.05	1000	0	True	IndivQLearningTabularSweep/170_17_0_centralized	centralized	0.05
IndivQLearningTabularSweep/170_17_0	none	True	-10	False	GridWorld	SUNY	FullObsDiscrete	Individual_Q	1.0	0.05	1000	0	True	IndivQLearningTabularSweep/170_17_0_decentralized	decentralized	0.05
IndivQLearningTabularSweep/170_17_0	none	True	-10	False	GridWorld	SUNY	FullObsDiscrete	Individual_Q	1.0	0.05	1000	0	True	IndivQLearningTabularSweep/170_17_0_none	none	0.05
IndivQLearningTabularSweep/171_17_1	none	True	-10	False	GridWorld	SUNY	FullObsDiscrete	Individual_Q	1.0	0.05	1000	1	True	IndivQLearningTabularSweep/171_17_1_centralized	centralized	0.05
IndivQLearningTabularSweep/171_17_1	none	True	-10	False	GridWorld	SUNY	FullObsDiscrete	Individual_Q	1.0	0.05	1000	1	True	IndivQLearningTabularSweep/171_17_1_decentralized	decentralized	0.05
IndivQLearningTabularSweep/171_17_1	none	True	-10	False	GridWorld	SUNY	FullObsDiscrete	Individual_Q	1.0	0.05	1000	1	True	IndivQLearningTabularSweep/171_17_1_none	none	0.05
IndivQLearningTabularSweep/172_17_2	none	True	-10	False	GridWorld	SUNY	FullObsDiscrete	Individual_Q	1.0	0.05	1000	2	True	IndivQLearningTabularSweep/172_17_2_centralized	centralized	0.05
IndivQLearningTabularSweep/172_17_2	none	True	-10	False	GridWorld	SUNY	FullObsDiscrete	Individual_Q	1.0	0.05	1000	2	True	IndivQLearningTabularSweep/172_17_2_decentralized	decentralized	0.05
IndivQLearningTabularSweep/172_17_2	none	True	-10	False	GridWorld	SUNY	FullObsDiscrete	Individual_Q	1.0	0.05	1000	2	True	IndivQLearningTabularSweep/172_17_2_none	none	0.05
IndivQLearningTabularSweep/173_17_3	none	True	-10	False	GridWorld	SUNY	FullObsDiscrete	Individual_Q	1.0	0.05	1000	3	True	IndivQLearningTabularSweep/173_17_3_centralized	centralized	0.05
IndivQLearningTabularSweep/173_17_3	none	True	-10	False	GridWorld	SUNY	FullObsDiscrete	Individual_Q	1.0	0.05	1000	3	True	IndivQLearningTabularSweep/173_17_3_decentralized	decentralized	0.05
IndivQLearningTabularSweep/173_17_3	none	True	-10	False	GridWorld	SUNY	FullObsDiscrete	Individual_Q	1.0	0.05	1000	3	True	IndivQLearningTabularSweep/173_17_3_none	none	0.05
IndivQLearningTabularSweep/174_17_4	none	True	-10	False	GridWorld	SUNY	FullObsDiscrete	Individual_Q	1.0	0.05	1000	4	True	IndivQLearningTabularSweep/174_17_4_centralized	centralized	0.05
IndivQLearningTabularSweep/174_17_4	none	True	-10	False	GridWorld	SUNY	FullObsDiscrete	Individual_Q	1.0	0.05	1000	4	True	IndivQLearningTabularSweep/174_17_4_decentralized	decentralized	0.05
IndivQLearningTabularSweep/174_17_4	none	True	-10	False	GridWorld	SUNY	FullObsDiscrete	Individual_Q	1.0	0.05	1000	4	True	IndivQLearningTabularSweep/174_17_4_none	none	0.05
IndivQLearningTabularSweep/175_17_5	none	True	-10	False	GridWorld	SUNY	FullObsDiscrete	Individual_Q	1.0	0.05	1000	5	True	IndivQLearningTabularSweep/175_17_5_centralized	centralized	0.05
IndivQLearningTabularSweep/175_17_5	none	True	-10	False	GridWorld	SUNY	FullObsDiscrete	Individual_Q	1.0	0.05	1000	5	True	IndivQLearningTabularSweep/175_17_5_decentralized	decentralized	0.05
IndivQLearningTabularSweep/175_17_5	none	True	-10	False	GridWorld	SUNY	FullObsDiscrete	Individual_Q	1.0	0.05	1000	5	True	IndivQLearningTabularSweep/175_17_5_none	none	0.05
IndivQLearningTabularSweep/176_17_6	none	True	-10	False	GridWorld	SUNY	FullObsDiscrete	Individual_Q	1.0	0.05	1000	6	True	IndivQLearningTabularSweep/176_17_6_centralized	centralized	0.05
IndivQLearningTabularSweep/176_17_6	none	True	-10	False	GridWorld	SUNY	FullObsDiscrete	Individual_Q	1.0	0.05	1000	6	True	IndivQLearningTabularSweep/176_17_6_decentralized	decentralized	0.05
IndivQLearningTabularSweep/176_17_6	none	True	-10	False	GridWorld	SUNY	FullObsDiscrete	Individual_Q	1.0	0.05	1000	6	True	IndivQLearningTabularSweep/176_17_6_none	none	0.05
IndivQLearningTabularSweep/177_17_7	none	True	-10	False	GridWorld	SUNY	FullObsDiscrete	Individual_Q	1.0	0.05	1000	7	True	IndivQLearningTabularSweep/177_17_7_centralized	centralized	0.05
IndivQLearningTabularSweep/177_17_7	none	True	-10	False	GridWorld	SUNY	FullObsDiscrete	Individual_Q	1.0	0.05	1000	7	True	IndivQLearningTabularSweep/177_17_7_decentralized	decentralized	0.05
IndivQLearningTabularSweep/177_17_7	none	True	-10	False	GridWorld	SUNY	FullObsDiscrete	Individual_Q	1.0	0.05	1000	7	True	IndivQLearningTabularSweep/177_17_7_none	none	0.05
IndivQLearningTabularSweep/178_17_8	none	True	-10	False	GridWorld	SUNY	FullObsDiscrete	Individual_Q	1.0	0.05	1000	8	True	IndivQLearningTabularSweep/178_17_8_centralized	centralized	0.05
IndivQLearningTabularSweep/178_17_8	none	True	-10	False	GridWorld	SUNY	FullObsDiscrete	Individual_Q	1.0	0.05	1000	8	True	IndivQLearningTabularSweep/178_17_8_decentralized	decentralized	0.05
IndivQLearningTabularSweep/178_17_8	none	True	-10	False	GridWorld	SUNY	FullObsDiscrete	Individual_Q	1.0	0.05	1000	8	True	IndivQLearningTabularSweep/178_17_8_none	none	0.05
IndivQLearningTabularSweep/179_17_9	none	True	-10	False	GridWorld	SUNY	FullObsDiscrete	Individual_Q	1.0	0.05	1000	9	True	IndivQLearningTabularSweep/179_17_9_centralized	centralized	0.05
IndivQLearningTabularSweep/179_17_9	none	True	-10	False	GridWorld	SUNY	FullObsDiscrete	Individual_Q	1.0	0.05	1000	9	True	IndivQLearningTabularSweep/179_17_9_decentralized	decentralized	0.05
IndivQLearningTabularSweep/179_17_9	none	True	-10	False	GridWorld	SUNY	FullObsDiscrete	Individual_Q	1.0	0.05	1000	9	True	IndivQLearningTabularSweep/179_17_9_none	none	0.05
IndivQLearningTabularSweep/180_18_0	centralized	True	-10	True	GridWorld	MIT	FullObsDiscrete	Individual_Q	1.0	0.05	1000	0	True	IndivQLearningTabularSweep/180_18_0_centralized	centralized	0.05
IndivQLearningTabularSweep/180_18_0	centralized	True	-10	True	GridWorld	MIT	FullObsDiscrete	Individual_Q	1.0	0.05	1000	0	True	IndivQLearningTabularSweep/180_18_0_decentralized	decentralized	0.05
IndivQLearningTabularSweep/180_18_0	centralized	True	-10	True	GridWorld	MIT	FullObsDiscrete	Individual_Q	1.0	0.05	1000	0	True	IndivQLearningTabularSweep/180_18_0_none	none	0.05
IndivQLearningTabularSweep/181_18_1	centralized	True	-10	True	GridWorld	MIT	FullObsDiscrete	Individual_Q	1.0	0.05	1000	1	True	IndivQLearningTabularSweep/181_18_1_centralized	centralized	0.05
IndivQLearningTabularSweep/181_18_1	centralized	True	-10	True	GridWorld	MIT	FullObsDiscrete	Individual_Q	1.0	0.05	1000	1	True	IndivQLearningTabularSweep/181_18_1_decentralized	decentralized	0.05
IndivQLearningTabularSweep/181_18_1	centralized	True	-10	True	GridWorld	MIT	FullObsDiscrete	Individual_Q	1.0	0.05	1000	1	True	IndivQLearningTabularSweep/181_18_1_none	none	0.05
IndivQLearningTabularSweep/182_18_2	centralized	True	-10	True	GridWorld	MIT	FullObsDiscrete	Individual_Q	1.0	0.05	1000	2	True	IndivQLearningTabularSweep/182_18_2_centralized	centralized	0.05
IndivQLearningTabularSweep/182_18_2	centralized	True	-10	True	GridWorld	MIT	FullObsDiscrete	Individual_Q	1.0	0.05	1000	2	True	IndivQLearningTabularSweep/182_18_2_decentralized	decentralized	0.05
IndivQLearningTabularSweep/182_18_2	centralized	True	-10	True	GridWorld	MIT	FullObsDiscrete	Individual_Q	1.0	0.05	1000	2	True	IndivQLearningTabularSweep/182_18_2_none	none	0.05
IndivQLearningTabularSweep/183_18_3	centralized	True	-10	True	GridWorld	MIT	FullObsDiscrete	Individual_Q	1.0	0.05	1000	3	True	IndivQLearningTabularSweep/183_18_3_centralized	centralized	0.05
IndivQLearningTabularSweep/183_18_3	centralized	True	-10	True	GridWorld	MIT	FullObsDiscrete	Individual_Q	1.0	0.05	1000	3	True	IndivQLearningTabularSweep/183_18_3_decentralized	decentralized	0.05
IndivQLearningTabularSweep/183_18_3	centralized	True	-10	True	GridWorld	MIT	FullObsDiscrete	Individual_Q	1.0	0.05	1000	3	True	IndivQLearningTabularSweep/183_18_3_none	none	0.05
IndivQLearningTabularSweep/184_18_4	centralized	True	-10	True	GridWorld	MIT	FullObsDiscrete	Individual_Q	1.0	0.05	1000	4	True	IndivQLearningTabularSweep/184_18_4_centralized	centralized	0.05
IndivQLearningTabularSweep/184_18_4	centralized	True	-10	True	GridWorld	MIT	FullObsDiscrete	Individual_Q	1.0	0.05	1000	4	True	IndivQLearningTabularSweep/184_18_4_decentralized	decentralized	0.05
IndivQLearningTabularSweep/184_18_4	centralized	True	-10	True	GridWorld	MIT	FullObsDiscrete	Individual_Q	1.0	0.05	1000	4	True	IndivQLearningTabularSweep/184_18_4_none	none	0.05
IndivQLearningTabularSweep/185_18_5	centralized	True	-10	True	GridWorld	MIT	FullObsDiscrete	Individual_Q	1.0	0.05	1000	5	True	IndivQLearningTabularSweep/185_18_5_centralized	centralized	0.05
IndivQLearningTabularSweep/185_18_5	centralized	True	-10	True	GridWorld	MIT	FullObsDiscrete	Individual_Q	1.0	0.05	1000	5	True	IndivQLearningTabularSweep/185_18_5_decentralized	decentralized	0.05
IndivQLearningTabularSweep/185_18_5	centralized	True	-10	True	GridWorld	MIT	FullObsDiscrete	Individual_Q	1.0	0.05	1000	5	True	IndivQLearningTabularSweep/185_18_5_none	none	0.05
IndivQLearningTabularSweep/186_18_6	centralized	True	-10	True	GridWorld	MIT	FullObsDiscrete	Individual_Q	1.0	0.05	1000	6	True	IndivQLearningTabularSweep/186_18_6_centralized	centralized	0.05
IndivQLearningTabularSweep/186_18_6	centralized	True	-10	True	GridWorld	MIT	FullObsDiscrete	Individual_Q	1.0	0.05	1000	6	True	IndivQLearningTabularSweep/186_18_6_decentralized	decentralized	0.05
IndivQLearningTabularSweep/186_18_6	centralized	True	-10	True	GridWorld	MIT	FullObsDiscrete	Individual_Q	1.0	0.05	1000	6	True	IndivQLearningTabularSweep/186_18_6_none	none	0.05
IndivQLearningTabularSweep/187_18_7	centralized	True	-10	True	GridWorld	MIT	FullObsDiscrete	Individual_Q	1.0	0.05	1000	7	True	IndivQLearningTabularSweep/187_18_7_centralized	centralized	0.05
IndivQLearningTabularSweep/187_18_7	centralized	True	-10	True	GridWorld	MIT	FullObsDiscrete	Individual_Q	1.0	0.05	1000	7	True	IndivQLearningTabularSweep/187_18_7_decentralized	decentralized	0.05
IndivQLearningTabularSweep/187_18_7	centralized	True	-10	True	GridWorld	MIT	FullObsDiscrete	Individual_Q	1.0	0.05	1000	7	True	IndivQLearningTabularSweep/187_18_7_none	none	0.05
IndivQLearningTabularSweep/188_18_8	centralized	True	-10	True	GridWorld	MIT	FullObsDiscrete	Individual_Q	1.0	0.05	1000	8	True	IndivQLearningTabularSweep/188_18_8_centralized	centralized	0.05
IndivQLearningTabularSweep/188_18_8	centralized	True	-10	True	GridWorld	MIT	FullObsDiscrete	Individual_Q	1.0	0.05	1000	8	True	IndivQLearningTabularSweep/188_18_8_decentralized	decentralized	0.05
IndivQLearningTabularSweep/188_18_8	centralized	True	-10	True	GridWorld	MIT	FullObsDiscrete	Individual_Q	1.0	0.05	1000	8	True	IndivQLearningTabularSweep/188_18_8_none	none	0.05
IndivQLearningTabularSweep/189_18_9	centralized	True	-10	True	GridWorld	MIT	FullObsDiscrete	Individual_Q	1.0	0.05	1000	9	True	IndivQLearningTabularSweep/189_18_9_centralized	centralized	0.05
IndivQLearningTabularSweep/189_18_9	centralized	True	-10	True	GridWorld	MIT	FullObsDiscrete	Individual_Q	1.0	0.05	1000	9	True	IndivQLearningTabularSweep/189_18_9_decentralized	decentralized	0.05
IndivQLearningTabularSweep/189_18_9	centralized	True	-10	True	GridWorld	MIT	FullObsDiscrete	Individual_Q	1.0	0.05	1000	9	True	IndivQLearningTabularSweep/189_18_9_none	none	0.05
IndivQLearningTabularSweep/190_19_0	decentralized	True	-10	True	GridWorld	MIT	FullObsDiscrete	Individual_Q	1.0	0.05	1000	0	True	IndivQLearningTabularSweep/190_19_0_centralized	centralized	0.05
IndivQLearningTabularSweep/190_19_0	decentralized	True	-10	True	GridWorld	MIT	FullObsDiscrete	Individual_Q	1.0	0.05	1000	0	True	IndivQLearningTabularSweep/190_19_0_decentralized	decentralized	0.05
IndivQLearningTabularSweep/190_19_0	decentralized	True	-10	True	GridWorld	MIT	FullObsDiscrete	Individual_Q	1.0	0.05	1000	0	True	IndivQLearningTabularSweep/190_19_0_none	none	0.05
IndivQLearningTabularSweep/191_19_1	decentralized	True	-10	True	GridWorld	MIT	FullObsDiscrete	Individual_Q	1.0	0.05	1000	1	True	IndivQLearningTabularSweep/191_19_1_centralized	centralized	0.05
IndivQLearningTabularSweep/191_19_1	decentralized	True	-10	True	GridWorld	MIT	FullObsDiscrete	Individual_Q	1.0	0.05	1000	1	True	IndivQLearningTabularSweep/191_19_1_decentralized	decentralized	0.05
IndivQLearningTabularSweep/191_19_1	decentralized	True	-10	True	GridWorld	MIT	FullObsDiscrete	Individual_Q	1.0	0.05	1000	1	True	IndivQLearningTabularSweep/191_19_1_none	none	0.05
IndivQLearningTabularSweep/192_19_2	decentralized	True	-10	True	GridWorld	MIT	FullObsDiscrete	Individual_Q	1.0	0.05	1000	2	True	IndivQLearningTabularSweep/192_19_2_centralized	centralized	0.05
IndivQLearningTabularSweep/192_19_2	decentralized	True	-10	True	GridWorld	MIT	FullObsDiscrete	Individual_Q	1.0	0.05	1000	2	True	IndivQLearningTabularSweep/192_19_2_decentralized	decentralized	0.05
IndivQLearningTabularSweep/192_19_2	decentralized	True	-10	True	GridWorld	MIT	FullObsDiscrete	Individual_Q	1.0	0.05	1000	2	True	IndivQLearningTabularSweep/192_19_2_none	none	0.05
IndivQLearningTabularSweep/193_19_3	decentralized	True	-10	True	GridWorld	MIT	FullObsDiscrete	Individual_Q	1.0	0.05	1000	3	True	IndivQLearningTabularSweep/193_19_3_centralized	centralized	0.05
IndivQLearningTabularSweep/193_19_3	decentralized	True	-10	True	GridWorld	MIT	FullObsDiscrete	Individual_Q	1.0	0.05	1000	3	True	IndivQLearningTabularSweep/193_19_3_decentralized	decentralized	0.05
IndivQLearningTabularSweep/193_19_3	decentralized	True	-10	True	GridWorld	MIT	FullObsDiscrete	Individual_Q	1.0	0.05	1000	3	True	IndivQLearningTabularSweep/193_19_3_none	none	0.05
IndivQLearningTabularSweep/194_19_4	decentralized	True	-10	True	GridWorld	MIT	FullObsDiscrete	Individual_Q	1.0	0.05	1000	4	True	IndivQLearningTabularSweep/194_19_4_centralized	centralized	0.05
IndivQLearningTabularSweep/194_19_4	decentralized	True	-10	True	GridWorld	MIT	FullObsDiscrete	Individual_Q	1.0	0.05	1000	4	True	IndivQLearningTabularSweep/194_19_4_decentralized	decentralized	0.05
IndivQLearningTabularSweep/194_19_4	decentralized	True	-10	True	GridWorld	MIT	FullObsDiscrete	Individual_Q	1.0	0.05	1000	4	True	IndivQLearningTabularSweep/194_19_4_none	none	0.05
IndivQLearningTabularSweep/195_19_5	decentralized	True	-10	True	GridWorld	MIT	FullObsDiscrete	Individual_Q	1.0	0.05	1000	5	True	IndivQLearningTabularSweep/195_19_5_centralized	centralized	0.05
IndivQLearningTabularSweep/195_19_5	decentralized	True	-10	True	GridWorld	MIT	FullObsDiscrete	Individual_Q	1.0	0.05	1000	5	True	IndivQLearningTabularSweep/195_19_5_decentralized	decentralized	0.05
IndivQLearningTabularSweep/195_19_5	decentralized	True	-10	True	GridWorld	MIT	FullObsDiscrete	Individual_Q	1.0	0.05	1000	5	True	IndivQLearningTabularSweep/195_19_5_none	none	0.05
IndivQLearningTabularSweep/196_19_6	decentralized	True	-10	True	GridWorld	MIT	FullObsDiscrete	Individual_Q	1.0	0.05	1000	6	True	IndivQLearningTabularSweep/196_19_6_centralized	centralized	0.05
IndivQLearningTabularSweep/196_19_6	decentralized	True	-10	True	GridWorld	MIT	FullObsDiscrete	Individual_Q	1.0	0.05	1000	6	True	IndivQLearningTabularSweep/196_19_6_decentralized	decentralized	0.05
IndivQLearningTabularSweep/196_19_6	decentralized	True	-10	True	GridWorld	MIT	FullObsDiscrete	Individual_Q	1.0	0.05	1000	6	True	IndivQLearningTabularSweep/196_19_6_none	none	0.05
IndivQLearningTabularSweep/197_19_7	decentralized	True	-10	True	GridWorld	MIT	FullObsDiscrete	Individual_Q	1.0	0.05	1000	7	True	IndivQLearningTabularSweep/197_19_7_centralized	centralized	0.05
IndivQLearningTabularSweep/197_19_7	decentralized	True	-10	True	GridWorld	MIT	FullObsDiscrete	Individual_Q	1.0	0.05	1000	7	True	IndivQLearningTabularSweep/197_19_7_decentralized	decentralized	0.05
IndivQLearningTabularSweep/197_19_7	decentralized	True	-10	True	GridWorld	MIT	FullObsDiscrete	Individual_Q	1.0	0.05	1000	7	True	IndivQLearningTabularSweep/197_19_7_none	none	0.05
IndivQLearningTabularSweep/198_19_8	decentralized	True	-10	True	GridWorld	MIT	FullObsDiscrete	Individual_Q	1.0	0.05	1000	8	True	IndivQLearningTabularSweep/198_19_8_centralized	centralized	0.05
IndivQLearningTabularSweep/198_19_8	decentralized	True	-10	True	GridWorld	MIT	FullObsDiscrete	Individual_Q	1.0	0.05	1000	8	True	IndivQLearningTabularSweep/198_19_8_decentralized	decentralized	0.05
IndivQLearningTabularSweep/198_19_8	decentralized	True	-10	True	GridWorld	MIT	FullObsDiscrete	Individual_Q	1.0	0.05	1000	8	True	IndivQLearningTabularSweep/198_19_8_none	none	0.05
IndivQLearningTabularSweep/199_19_9	decentralized	True	-10	True	GridWorld	MIT	FullObsDiscrete	Individual_Q	1.0	0.05	1000	9	True	IndivQLearningTabularSweep/199_19_9_centralized	centralized	0.05
IndivQLearningTabularSweep/199_19_9	decentralized	True	-10	True	GridWorld	MIT	FullObsDiscrete	Individual_Q	1.0	0.05	1000	9	True	IndivQLearningTabularSweep/199_19_9_decentralized	decentralized	0.05
IndivQLearningTabularSweep/199_19_9	decentralized	True	-10	True	GridWorld	MIT	FullObsDiscrete	Individual_Q	1.0	0.05	1000	9	True	IndivQLearningTabularSweep/199_19_9_none	none	0.05
IndivQLearningTabularSweep/200_20_0	none	True	-10	True	GridWorld	MIT	FullObsDiscrete	Individual_Q	1.0	0.05	1000	0	True	IndivQLearningTabularSweep/200_20_0_centralized	centralized	0.05
IndivQLearningTabularSweep/200_20_0	none	True	-10	True	GridWorld	MIT	FullObsDiscrete	Individual_Q	1.0	0.05	1000	0	True	IndivQLearningTabularSweep/200_20_0_decentralized	decentralized	0.05
IndivQLearningTabularSweep/200_20_0	none	True	-10	True	GridWorld	MIT	FullObsDiscrete	Individual_Q	1.0	0.05	1000	0	True	IndivQLearningTabularSweep/200_20_0_none	none	0.05
IndivQLearningTabularSweep/201_20_1	none	True	-10	True	GridWorld	MIT	FullObsDiscrete	Individual_Q	1.0	0.05	1000	1	True	IndivQLearningTabularSweep/201_20_1_centralized	centralized	0.05
IndivQLearningTabularSweep/201_20_1	none	True	-10	True	GridWorld	MIT	FullObsDiscrete	Individual_Q	1.0	0.05	1000	1	True	IndivQLearningTabularSweep/201_20_1_decentralized	decentralized	0.05
IndivQLearningTabularSweep/201_20_1	none	True	-10	True	GridWorld	MIT	FullObsDiscrete	Individual_Q	1.0	0.05	1000	1	True	IndivQLearningTabularSweep/201_20_1_none	none	0.05
IndivQLearningTabularSweep/202_20_2	none	True	-10	True	GridWorld	MIT	FullObsDiscrete	Individual_Q	1.0	0.05	1000	2	True	IndivQLearningTabularSweep/202_20_2_centralized	centralized	0.05
IndivQLearningTabularSweep/202_20_2	none	True	-10	True	GridWorld	MIT	FullObsDiscrete	Individual_Q	1.0	0.05	1000	2	True	IndivQLearningTabularSweep/202_20_2_decentralized	decentralized	0.05
IndivQLearningTabularSweep/202_20_2	none	True	-10	True	GridWorld	MIT	FullObsDiscrete	Individual_Q	1.0	0.05	1000	2	True	IndivQLearningTabularSweep/202_20_2_none	none	0.05
IndivQLearningTabularSweep/203_20_3	none	True	-10	True	GridWorld	MIT	FullObsDiscrete	Individual_Q	1.0	0.05	1000	3	True	IndivQLearningTabularSweep/203_20_3_centralized	centralized	0.05
IndivQLearningTabularSweep/203_20_3	none	True	-10	True	GridWorld	MIT	FullObsDiscrete	Individual_Q	1.0	0.05	1000	3	True	IndivQLearningTabularSweep/203_20_3_decentralized	decentralized	0.05
IndivQLearningTabularSweep/203_20_3	none	True	-10	True	GridWorld	MIT	FullObsDiscrete	Individual_Q	1.0	0.05	1000	3	True	IndivQLearningTabularSweep/203_20_3_none	none	0.05
IndivQLearningTabularSweep/204_20_4	none	True	-10	True	GridWorld	MIT	FullObsDiscrete	Individual_Q	1.0	0.05	1000	4	True	IndivQLearningTabularSweep/204_20_4_centralized	centralized	0.05
IndivQLearningTabularSweep/204_20_4	none	True	-10	True	GridWorld	MIT	FullObsDiscrete	Individual_Q	1.0	0.05	1000	4	True	IndivQLearningTabularSweep/204_20_4_decentralized	decentralized	0.05
IndivQLearningTabularSweep/204_20_4	none	True	-10	True	GridWorld	MIT	FullObsDiscrete	Individual_Q	1.0	0.05	1000	4	True	IndivQLearningTabularSweep/204_20_4_none	none	0.05
IndivQLearningTabularSweep/205_20_5	none	True	-10	True	GridWorld	MIT	FullObsDiscrete	Individual_Q	1.0	0.05	1000	5	True	IndivQLearningTabularSweep/205_20_5_centralized	centralized	0.05
IndivQLearningTabularSweep/205_20_5	none	True	-10	True	GridWorld	MIT	FullObsDiscrete	Individual_Q	1.0	0.05	1000	5	True	IndivQLearningTabularSweep/205_20_5_decentralized	decentralized	0.05
IndivQLearningTabularSweep/205_20_5	none	True	-10	True	GridWorld	MIT	FullObsDiscrete	Individual_Q	1.0	0.05	1000	5	True	IndivQLearningTabularSweep/205_20_5_none	none	0.05
IndivQLearningTabularSweep/206_20_6	none	True	-10	True	GridWorld	MIT	FullObsDiscrete	Individual_Q	1.0	0.05	1000	6	True	IndivQLearningTabularSweep/206_20_6_centralized	centralized	0.05
IndivQLearningTabularSweep/206_20_6	none	True	-10	True	GridWorld	MIT	FullObsDiscrete	Individual_Q	1.0	0.05	1000	6	True	IndivQLearningTabularSweep/206_20_6_decentralized	decentralized	0.05
IndivQLearningTabularSweep/206_20_6	none	True	-10	True	GridWorld	MIT	FullObsDiscrete	Individual_Q	1.0	0.05	1000	6	True	IndivQLearningTabularSweep/206_20_6_none	none	0.05
IndivQLearningTabularSweep/207_20_7	none	True	-10	True	GridWorld	MIT	FullObsDiscrete	Individual_Q	1.0	0.05	1000	7	True	IndivQLearningTabularSweep/207_20_7_centralized	centralized	0.05
IndivQLearningTabularSweep/207_20_7	none	True	-10	True	GridWorld	MIT	FullObsDiscrete	Individual_Q	1.0	0.05	1000	7	True	IndivQLearningTabularSweep/207_20_7_decentralized	decentralized	0.05
IndivQLearningTabularSweep/207_20_7	none	True	-10	True	GridWorld	MIT	FullObsDiscrete	Individual_Q	1.0	0.05	1000	7	True	IndivQLearningTabularSweep/207_20_7_none	none	0.05
IndivQLearningTabularSweep/208_20_8	none	True	-10	True	GridWorld	MIT	FullObsDiscrete	Individual_Q	1.0	0.05	1000	8	True	IndivQLearningTabularSweep/208_20_8_centralized	centralized	0.05
IndivQLearningTabularSweep/208_20_8	none	True	-10	True	GridWorld	MIT	FullObsDiscrete	Individual_Q	1.0	0.05	1000	8	True	IndivQLearningTabularSweep/208_20_8_decentralized	decentralized	0.05
IndivQLearningTabularSweep/208_20_8	none	True	-10	True	GridWorld	MIT	FullObsDiscrete	Individual_Q	1.0	0.05	1000	8	True	IndivQLearningTabularSweep/208_20_8_none	none	0.05
IndivQLearningTabularSweep/209_20_9	none	True	-10	True	GridWorld	MIT	FullObsDiscrete	Individual_Q	1.0	0.05	1000	9	True	IndivQLearningTabularSweep/209_20_9_centralized	centralized	0.05
IndivQLearningTabularSweep/209_20_9	none	True	-10	True	GridWorld	MIT	FullObsDiscrete	Individual_Q	1.0	0.05	1000	9	True	IndivQLearningTabularSweep/209_20_9_decentralized	decentralized	0.05
IndivQLearningTabularSweep/209_20_9	none	True	-10	True	GridWorld	MIT	FullObsDiscrete	Individual_Q	1.0	0.05	1000	9	True	IndivQLearningTabularSweep/209_20_9_none	none	0.05
IndivQLearningTabularSweep/210_21_0	centralized	True	-10	False	GridWorld	MIT	FullObsDiscrete	Individual_Q	1.0	0.05	1000	0	True	IndivQLearningTabularSweep/210_21_0_centralized	centralized	0.05
IndivQLearningTabularSweep/210_21_0	centralized	True	-10	False	GridWorld	MIT	FullObsDiscrete	Individual_Q	1.0	0.05	1000	0	True	IndivQLearningTabularSweep/210_21_0_decentralized	decentralized	0.05
IndivQLearningTabularSweep/210_21_0	centralized	True	-10	False	GridWorld	MIT	FullObsDiscrete	Individual_Q	1.0	0.05	1000	0	True	IndivQLearningTabularSweep/210_21_0_none	none	0.05
IndivQLearningTabularSweep/211_21_1	centralized	True	-10	False	GridWorld	MIT	FullObsDiscrete	Individual_Q	1.0	0.05	1000	1	True	IndivQLearningTabularSweep/211_21_1_centralized	centralized	0.05
IndivQLearningTabularSweep/211_21_1	centralized	True	-10	False	GridWorld	MIT	FullObsDiscrete	Individual_Q	1.0	0.05	1000	1	True	IndivQLearningTabularSweep/211_21_1_decentralized	decentralized	0.05
IndivQLearningTabularSweep/211_21_1	centralized	True	-10	False	GridWorld	MIT	FullObsDiscrete	Individual_Q	1.0	0.05	1000	1	True	IndivQLearningTabularSweep/211_21_1_none	none	0.05
IndivQLearningTabularSweep/212_21_2	centralized	True	-10	False	GridWorld	MIT	FullObsDiscrete	Individual_Q	1.0	0.05	1000	2	True	IndivQLearningTabularSweep/212_21_2_centralized	centralized	0.05
IndivQLearningTabularSweep/212_21_2	centralized	True	-10	False	GridWorld	MIT	FullObsDiscrete	Individual_Q	1.0	0.05	1000	2	True	IndivQLearningTabularSweep/212_21_2_decentralized	decentralized	0.05
IndivQLearningTabularSweep/212_21_2	centralized	True	-10	False	GridWorld	MIT	FullObsDiscrete	Individual_Q	1.0	0.05	1000	2	True	IndivQLearningTabularSweep/212_21_2_none	none	0.05
IndivQLearningTabularSweep/213_21_3	centralized	True	-10	False	GridWorld	MIT	FullObsDiscrete	Individual_Q	1.0	0.05	1000	3	True	IndivQLearningTabularSweep/213_21_3_centralized	centralized	0.05
IndivQLearningTabularSweep/213_21_3	centralized	True	-10	False	GridWorld	MIT	FullObsDiscrete	Individual_Q	1.0	0.05	1000	3	True	IndivQLearningTabularSweep/213_21_3_decentralized	decentralized	0.05
IndivQLearningTabularSweep/213_21_3	centralized	True	-10	False	GridWorld	MIT	FullObsDiscrete	Individual_Q	1.0	0.05	1000	3	True	IndivQLearningTabularSweep/213_21_3_none	none	0.05
IndivQLearningTabularSweep/214_21_4	centralized	True	-10	False	GridWorld	MIT	FullObsDiscrete	Individual_Q	1.0	0.05	1000	4	True	IndivQLearningTabularSweep/214_21_4_centralized	centralized	0.05
IndivQLearningTabularSweep/214_21_4	centralized	True	-10	False	GridWorld	MIT	FullObsDiscrete	Individual_Q	1.0	0.05	1000	4	True	IndivQLearningTabularSweep/214_21_4_decentralized	decentralized	0.05
IndivQLearningTabularSweep/214_21_4	centralized	True	-10	False	GridWorld	MIT	FullObsDiscrete	Individual_Q	1.0	0.05	1000	4	True	IndivQLearningTabularSweep/214_21_4_none	none	0.05
IndivQLearningTabularSweep/215_21_5	centralized	True	-10	False	GridWorld	MIT	FullObsDiscrete	Individual_Q	1.0	0.05	1000	5	True	IndivQLearningTabularSweep/215_21_5_centralized	centralized	0.05
IndivQLearningTabularSweep/215_21_5	centralized	True	-10	False	GridWorld	MIT	FullObsDiscrete	Individual_Q	1.0	0.05	1000	5	True	IndivQLearningTabularSweep/215_21_5_decentralized	decentralized	0.05
IndivQLearningTabularSweep/215_21_5	centralized	True	-10	False	GridWorld	MIT	FullObsDiscrete	Individual_Q	1.0	0.05	1000	5	True	IndivQLearningTabularSweep/215_21_5_none	none	0.05
IndivQLearningTabularSweep/216_21_6	centralized	True	-10	False	GridWorld	MIT	FullObsDiscrete	Individual_Q	1.0	0.05	1000	6	True	IndivQLearningTabularSweep/216_21_6_centralized	centralized	0.05
IndivQLearningTabularSweep/216_21_6	centralized	True	-10	False	GridWorld	MIT	FullObsDiscrete	Individual_Q	1.0	0.05	1000	6	True	IndivQLearningTabularSweep/216_21_6_decentralized	decentralized	0.05
IndivQLearningTabularSweep/216_21_6	centralized	True	-10	False	GridWorld	MIT	FullObsDiscrete	Individual_Q	1.0	0.05	1000	6	True	IndivQLearningTabularSweep/216_21_6_none	none	0.05
IndivQLearningTabularSweep/217_21_7	centralized	True	-10	False	GridWorld	MIT	FullObsDiscrete	Individual_Q	1.0	0.05	1000	7	True	IndivQLearningTabularSweep/217_21_7_centralized	centralized	0.05
IndivQLearningTabularSweep/217_21_7	centralized	True	-10	False	GridWorld	MIT	FullObsDiscrete	Individual_Q	1.0	0.05	1000	7	True	IndivQLearningTabularSweep/217_21_7_decentralized	decentralized	0.05
IndivQLearningTabularSweep/217_21_7	centralized	True	-10	False	GridWorld	MIT	FullObsDiscrete	Individual_Q	1.0	0.05	1000	7	True	IndivQLearningTabularSweep/217_21_7_none	none	0.05
IndivQLearningTabularSweep/218_21_8	centralized	True	-10	False	GridWorld	MIT	FullObsDiscrete	Individual_Q	1.0	0.05	1000	8	True	IndivQLearningTabularSweep/218_21_8_centralized	centralized	0.05
IndivQLearningTabularSweep/218_21_8	centralized	True	-10	False	GridWorld	MIT	FullObsDiscrete	Individual_Q	1.0	0.05	1000	8	True	IndivQLearningTabularSweep/218_21_8_decentralized	decentralized	0.05
IndivQLearningTabularSweep/218_21_8	centralized	True	-10	False	GridWorld	MIT	FullObsDiscrete	Individual_Q	1.0	0.05	1000	8	True	IndivQLearningTabularSweep/218_21_8_none	none	0.05
IndivQLearningTabularSweep/219_21_9	centralized	True	-10	False	GridWorld	MIT	FullObsDiscrete	Individual_Q	1.0	0.05	1000	9	True	IndivQLearningTabularSweep/219_21_9_centralized	centralized	0.05
IndivQLearningTabularSweep/219_21_9	centralized	True	-10	False	GridWorld	MIT	FullObsDiscrete	Individual_Q	1.0	0.05	1000	9	True	IndivQLearningTabularSweep/219_21_9_decentralized	decentralized	0.05
IndivQLearningTabularSweep/219_21_9	centralized	True	-10	False	GridWorld	MIT	FullObsDiscrete	Individual_Q	1.0	0.05	1000	9	True	IndivQLearningTabularSweep/219_21_9_none	none	0.05
IndivQLearningTabularSweep/220_22_0	decentralized	True	-10	False	GridWorld	MIT	FullObsDiscrete	Individual_Q	1.0	0.05	1000	0	True	IndivQLearningTabularSweep/220_22_0_centralized	centralized	0.05
IndivQLearningTabularSweep/220_22_0	decentralized	True	-10	False	GridWorld	MIT	FullObsDiscrete	Individual_Q	1.0	0.05	1000	0	True	IndivQLearningTabularSweep/220_22_0_decentralized	decentralized	0.05
IndivQLearningTabularSweep/220_22_0	decentralized	True	-10	False	GridWorld	MIT	FullObsDiscrete	Individual_Q	1.0	0.05	1000	0	True	IndivQLearningTabularSweep/220_22_0_none	none	0.05
IndivQLearningTabularSweep/221_22_1	decentralized	True	-10	False	GridWorld	MIT	FullObsDiscrete	Individual_Q	1.0	0.05	1000	1	True	IndivQLearningTabularSweep/221_22_1_centralized	centralized	0.05
IndivQLearningTabularSweep/221_22_1	decentralized	True	-10	False	GridWorld	MIT	FullObsDiscrete	Individual_Q	1.0	0.05	1000	1	True	IndivQLearningTabularSweep/221_22_1_decentralized	decentralized	0.05
IndivQLearningTabularSweep/221_22_1	decentralized	True	-10	False	GridWorld	MIT	FullObsDiscrete	Individual_Q	1.0	0.05	1000	1	True	IndivQLearningTabularSweep/221_22_1_none	none	0.05
IndivQLearningTabularSweep/222_22_2	decentralized	True	-10	False	GridWorld	MIT	FullObsDiscrete	Individual_Q	1.0	0.05	1000	2	True	IndivQLearningTabularSweep/222_22_2_centralized	centralized	0.05
IndivQLearningTabularSweep/222_22_2	decentralized	True	-10	False	GridWorld	MIT	FullObsDiscrete	Individual_Q	1.0	0.05	1000	2	True	IndivQLearningTabularSweep/222_22_2_decentralized	decentralized	0.05
IndivQLearningTabularSweep/222_22_2	decentralized	True	-10	False	GridWorld	MIT	FullObsDiscrete	Individual_Q	1.0	0.05	1000	2	True	IndivQLearningTabularSweep/222_22_2_none	none	0.05
IndivQLearningTabularSweep/223_22_3	decentralized	True	-10	False	GridWorld	MIT	FullObsDiscrete	Individual_Q	1.0	0.05	1000	3	True	IndivQLearningTabularSweep/223_22_3_centralized	centralized	0.05
IndivQLearningTabularSweep/223_22_3	decentralized	True	-10	False	GridWorld	MIT	FullObsDiscrete	Individual_Q	1.0	0.05	1000	3	True	IndivQLearningTabularSweep/223_22_3_decentralized	decentralized	0.05
IndivQLearningTabularSweep/223_22_3	decentralized	True	-10	False	GridWorld	MIT	FullObsDiscrete	Individual_Q	1.0	0.05	1000	3	True	IndivQLearningTabularSweep/223_22_3_none	none	0.05
IndivQLearningTabularSweep/224_22_4	decentralized	True	-10	False	GridWorld	MIT	FullObsDiscrete	Individual_Q	1.0	0.05	1000	4	True	IndivQLearningTabularSweep/224_22_4_centralized	centralized	0.05
IndivQLearningTabularSweep/224_22_4	decentralized	True	-10	False	GridWorld	MIT	FullObsDiscrete	Individual_Q	1.0	0.05	1000	4	True	IndivQLearningTabularSweep/224_22_4_decentralized	decentralized	0.05
IndivQLearningTabularSweep/224_22_4	decentralized	True	-10	False	GridWorld	MIT	FullObsDiscrete	Individual_Q	1.0	0.05	1000	4	True	IndivQLearningTabularSweep/224_22_4_none	none	0.05
IndivQLearningTabularSweep/225_22_5	decentralized	True	-10	False	GridWorld	MIT	FullObsDiscrete	Individual_Q	1.0	0.05	1000	5	True	IndivQLearningTabularSweep/225_22_5_centralized	centralized	0.05
IndivQLearningTabularSweep/225_22_5	decentralized	True	-10	False	GridWorld	MIT	FullObsDiscrete	Individual_Q	1.0	0.05	1000	5	True	IndivQLearningTabularSweep/225_22_5_decentralized	decentralized	0.05
IndivQLearningTabularSweep/225_22_5	decentralized	True	-10	False	GridWorld	MIT	FullObsDiscrete	Individual_Q	1.0	0.05	1000	5	True	IndivQLearningTabularSweep/225_22_5_none	none	0.05
IndivQLearningTabularSweep/226_22_6	decentralized	True	-10	False	GridWorld	MIT	FullObsDiscrete	Individual_Q	1.0	0.05	1000	6	True	IndivQLearningTabularSweep/226_22_6_centralized	centralized	0.05
IndivQLearningTabularSweep/226_22_6	decentralized	True	-10	False	GridWorld	MIT	FullObsDiscrete	Individual_Q	1.0	0.05	1000	6	True	IndivQLearningTabularSweep/226_22_6_decentralized	decentralized	0.05
IndivQLearningTabularSweep/226_22_6	decentralized	True	-10	False	GridWorld	MIT	FullObsDiscrete	Individual_Q	1.0	0.05	1000	6	True	IndivQLearningTabularSweep/226_22_6_none	none	0.05
IndivQLearningTabularSweep/227_22_7	decentralized	True	-10	False	GridWorld	MIT	FullObsDiscrete	Individual_Q	1.0	0.05	1000	7	True	IndivQLearningTabularSweep/227_22_7_centralized	centralized	0.05
IndivQLearningTabularSweep/227_22_7	decentralized	True	-10	False	GridWorld	MIT	FullObsDiscrete	Individual_Q	1.0	0.05	1000	7	True	IndivQLearningTabularSweep/227_22_7_decentralized	decentralized	0.05
IndivQLearningTabularSweep/227_22_7	decentralized	True	-10	False	GridWorld	MIT	FullObsDiscrete	Individual_Q	1.0	0.05	1000	7	True	IndivQLearningTabularSweep/227_22_7_none	none	0.05
IndivQLearningTabularSweep/228_22_8	decentralized	True	-10	False	GridWorld	MIT	FullObsDiscrete	Individual_Q	1.0	0.05	1000	8	True	IndivQLearningTabularSweep/228_22_8_centralized	centralized	0.05
IndivQLearningTabularSweep/228_22_8	decentralized	True	-10	False	GridWorld	MIT	FullObsDiscrete	Individual_Q	1.0	0.05	1000	8	True	IndivQLearningTabularSweep/228_22_8_decentralized	decentralized	0.05
IndivQLearningTabularSweep/228_22_8	decentralized	True	-10	False	GridWorld	MIT	FullObsDiscrete	Individual_Q	1.0	0.05	1000	8	True	IndivQLearningTabularSweep/228_22_8_none	none	0.05
IndivQLearningTabularSweep/229_22_9	decentralized	True	-10	False	GridWorld	MIT	FullObsDiscrete	Individual_Q	1.0	0.05	1000	9	True	IndivQLearningTabularSweep/229_22_9_centralized	centralized	0.05
IndivQLearningTabularSweep/229_22_9	decentralized	True	-10	False	GridWorld	MIT	FullObsDiscrete	Individual_Q	1.0	0.05	1000	9	True	IndivQLearningTabularSweep/229_22_9_decentralized	decentralized	0.05
IndivQLearningTabularSweep/229_22_9	decentralized	True	-10	False	GridWorld	MIT	FullObsDiscrete	Individual_Q	1.0	0.05	1000	9	True	IndivQLearningTabularSweep/229_22_9_none	none	0.05
IndivQLearningTabularSweep/230_23_0	none	True	-10	False	GridWorld	MIT	FullObsDiscrete	Individual_Q	1.0	0.05	1000	0	True	IndivQLearningTabularSweep/230_23_0_centralized	centralized	0.05
IndivQLearningTabularSweep/230_23_0	none	True	-10	False	GridWorld	MIT	FullObsDiscrete	Individual_Q	1.0	0.05	1000	0	True	IndivQLearningTabularSweep/230_23_0_decentralized	decentralized	0.05
IndivQLearningTabularSweep/230_23_0	none	True	-10	False	GridWorld	MIT	FullObsDiscrete	Individual_Q	1.0	0.05	1000	0	True	IndivQLearningTabularSweep/230_23_0_none	none	0.05
IndivQLearningTabularSweep/231_23_1	none	True	-10	False	GridWorld	MIT	FullObsDiscrete	Individual_Q	1.0	0.05	1000	1	True	IndivQLearningTabularSweep/231_23_1_centralized	centralized	0.05
IndivQLearningTabularSweep/231_23_1	none	True	-10	False	GridWorld	MIT	FullObsDiscrete	Individual_Q	1.0	0.05	1000	1	True	IndivQLearningTabularSweep/231_23_1_decentralized	decentralized	0.05
IndivQLearningTabularSweep/231_23_1	none	True	-10	False	GridWorld	MIT	FullObsDiscrete	Individual_Q	1.0	0.05	1000	1	True	IndivQLearningTabularSweep/231_23_1_none	none	0.05
IndivQLearningTabularSweep/232_23_2	none	True	-10	False	GridWorld	MIT	FullObsDiscrete	Individual_Q	1.0	0.05	1000	2	True	IndivQLearningTabularSweep/232_23_2_centralized	centralized	0.05
IndivQLearningTabularSweep/232_23_2	none	True	-10	False	GridWorld	MIT	FullObsDiscrete	Individual_Q	1.0	0.05	1000	2	True	IndivQLearningTabularSweep/232_23_2_decentralized	decentralized	0.05
IndivQLearningTabularSweep/232_23_2	none	True	-10	False	GridWorld	MIT	FullObsDiscrete	Individual_Q	1.0	0.05	1000	2	True	IndivQLearningTabularSweep/232_23_2_none	none	0.05
IndivQLearningTabularSweep/233_23_3	none	True	-10	False	GridWorld	MIT	FullObsDiscrete	Individual_Q	1.0	0.05	1000	3	True	IndivQLearningTabularSweep/233_23_3_centralized	centralized	0.05
IndivQLearningTabularSweep/233_23_3	none	True	-10	False	GridWorld	MIT	FullObsDiscrete	Individual_Q	1.0	0.05	1000	3	True	IndivQLearningTabularSweep/233_23_3_decentralized	decentralized	0.05
IndivQLearningTabularSweep/233_23_3	none	True	-10	False	GridWorld	MIT	FullObsDiscrete	Individual_Q	1.0	0.05	1000	3	True	IndivQLearningTabularSweep/233_23_3_none	none	0.05
IndivQLearningTabularSweep/234_23_4	none	True	-10	False	GridWorld	MIT	FullObsDiscrete	Individual_Q	1.0	0.05	1000	4	True	IndivQLearningTabularSweep/234_23_4_centralized	centralized	0.05
IndivQLearningTabularSweep/234_23_4	none	True	-10	False	GridWorld	MIT	FullObsDiscrete	Individual_Q	1.0	0.05	1000	4	True	IndivQLearningTabularSweep/234_23_4_decentralized	decentralized	0.05
IndivQLearningTabularSweep/234_23_4	none	True	-10	False	GridWorld	MIT	FullObsDiscrete	Individual_Q	1.0	0.05	1000	4	True	IndivQLearningTabularSweep/234_23_4_none	none	0.05
IndivQLearningTabularSweep/235_23_5	none	True	-10	False	GridWorld	MIT	FullObsDiscrete	Individual_Q	1.0	0.05	1000	5	True	IndivQLearningTabularSweep/235_23_5_centralized	centralized	0.05
IndivQLearningTabularSweep/235_23_5	none	True	-10	False	GridWorld	MIT	FullObsDiscrete	Individual_Q	1.0	0.05	1000	5	True	IndivQLearningTabularSweep/235_23_5_decentralized	decentralized	0.05
IndivQLearningTabularSweep/235_23_5	none	True	-10	False	GridWorld	MIT	FullObsDiscrete	Individual_Q	1.0	0.05	1000	5	True	IndivQLearningTabularSweep/235_23_5_none	none	0.05
IndivQLearningTabularSweep/236_23_6	none	True	-10	False	GridWorld	MIT	FullObsDiscrete	Individual_Q	1.0	0.05	1000	6	True	IndivQLearningTabularSweep/236_23_6_centralized	centralized	0.05
IndivQLearningTabularSweep/236_23_6	none	True	-10	False	GridWorld	MIT	FullObsDiscrete	Individual_Q	1.0	0.05	1000	6	True	IndivQLearningTabularSweep/236_23_6_decentralized	decentralized	0.05
IndivQLearningTabularSweep/236_23_6	none	True	-10	False	GridWorld	MIT	FullObsDiscrete	Individual_Q	1.0	0.05	1000	6	True	IndivQLearningTabularSweep/236_23_6_none	none	0.05
IndivQLearningTabularSweep/237_23_7	none	True	-10	False	GridWorld	MIT	FullObsDiscrete	Individual_Q	1.0	0.05	1000	7	True	IndivQLearningTabularSweep/237_23_7_centralized	centralized	0.05
IndivQLearningTabularSweep/237_23_7	none	True	-10	False	GridWorld	MIT	FullObsDiscrete	Individual_Q	1.0	0.05	1000	7	True	IndivQLearningTabularSweep/237_23_7_decentralized	decentralized	0.05
IndivQLearningTabularSweep/237_23_7	none	True	-10	False	GridWorld	MIT	FullObsDiscrete	Individual_Q	1.0	0.05	1000	7	True	IndivQLearningTabularSweep/237_23_7_none	none	0.05
IndivQLearningTabularSweep/238_23_8	none	True	-10	False	GridWorld	MIT	FullObsDiscrete	Individual_Q	1.0	0.05	1000	8	True	IndivQLearningTabularSweep/238_23_8_centralized	centralized	0.05
IndivQLearningTabularSweep/238_23_8	none	True	-10	False	GridWorld	MIT	FullObsDiscrete	Individual_Q	1.0	0.05	1000	8	True	IndivQLearningTabularSweep/238_23_8_decentralized	decentralized	0.05
IndivQLearningTabularSweep/238_23_8	none	True	-10	False	GridWorld	MIT	FullObsDiscrete	Individual_Q	1.0	0.05	1000	8	True	IndivQLearningTabularSweep/238_23_8_none	none	0.05
IndivQLearningTabularSweep/239_23_9	none	True	-10	False	GridWorld	MIT	FullObsDiscrete	Individual_Q	1.0	0.05	1000	9	True	IndivQLearningTabularSweep/239_23_9_centralized	centralized	0.05
IndivQLearningTabularSweep/239_23_9	none	True	-10	False	GridWorld	MIT	FullObsDiscrete	Individual_Q	1.0	0.05	1000	9	True	IndivQLearningTabularSweep/239_23_9_decentralized	decentralized	0.05
IndivQLearningTabularSweep/239_23_9	none	True	-10	False	GridWorld	MIT	FullObsDiscrete	Individual_Q	1.0	0.05	1000	9	True	IndivQLearningTabularSweep/239_23_9_none	none	0.05
