# Supplementary material
Source: ML conference proceedings conference paper supplement (https://proceedings.neurips.cc/paper_files/paper/2022/hash/57444e14ecd9e2c8f603b4f012ce3811-Abstract.html)
Supplement: Supplementary file 1 [file 57444e14ecd9e2c8f603b4f012ce3811-Supplemental-Conference.zip › 3410_shield_decentralization_for_sa-Supplementary Material/parallel_configs/IndivQLearningTabularSweepMillionStepsEval.csv]

run_name	shield	punish_unsafe_orig_action	punish_unsafe_orig_action_modifier	randomize_starts	map_type	grid_world_map_name	grid_world_obs_type	learner_type	learner_anneal_eps_start	learner_anneal_eps_finish	max_total_steps	seed	skip_training	evaluation_run_name	evaluation_shield	learner_evaluation_epsilon
IndivQLearningTabularSweepMillionSteps/0_0_0	centralized	True	-10	True	GridWorld	Pentagon	FullObsDiscrete	Individual_Q	1.0	0.05	1000000	0	True	IndivQLearningTabularSweepMillionSteps/0_0_0_centralized	centralized	0.05
IndivQLearningTabularSweepMillionSteps/0_0_0	centralized	True	-10	True	GridWorld	Pentagon	FullObsDiscrete	Individual_Q	1.0	0.05	1000000	0	True	IndivQLearningTabularSweepMillionSteps/0_0_0_decentralized	decentralized	0.05
IndivQLearningTabularSweepMillionSteps/0_0_0	centralized	True	-10	True	GridWorld	Pentagon	FullObsDiscrete	Individual_Q	1.0	0.05	1000000	0	True	IndivQLearningTabularSweepMillionSteps/0_0_0_none	none	0.05
IndivQLearningTabularSweepMillionSteps/1_0_1	centralized	True	-10	True	GridWorld	Pentagon	FullObsDiscrete	Individual_Q	1.0	0.05	1000000	1	True	IndivQLearningTabularSweepMillionSteps/1_0_1_centralized	centralized	0.05
IndivQLearningTabularSweepMillionSteps/1_0_1	centralized	True	-10	True	GridWorld	Pentagon	FullObsDiscrete	Individual_Q	1.0	0.05	1000000	1	True	IndivQLearningTabularSweepMillionSteps/1_0_1_decentralized	decentralized	0.05
IndivQLearningTabularSweepMillionSteps/1_0_1	centralized	True	-10	True	GridWorld	Pentagon	FullObsDiscrete	Individual_Q	1.0	0.05	1000000	1	True	IndivQLearningTabularSweepMillionSteps/1_0_1_none	none	0.05
IndivQLearningTabularSweepMillionSteps/2_0_2	centralized	True	-10	True	GridWorld	Pentagon	FullObsDiscrete	Individual_Q	1.0	0.05	1000000	2	True	IndivQLearningTabularSweepMillionSteps/2_0_2_centralized	centralized	0.05
IndivQLearningTabularSweepMillionSteps/2_0_2	centralized	True	-10	True	GridWorld	Pentagon	FullObsDiscrete	Individual_Q	1.0	0.05	1000000	2	True	IndivQLearningTabularSweepMillionSteps/2_0_2_decentralized	decentralized	0.05
IndivQLearningTabularSweepMillionSteps/2_0_2	centralized	True	-10	True	GridWorld	Pentagon	FullObsDiscrete	Individual_Q	1.0	0.05	1000000	2	True	IndivQLearningTabularSweepMillionSteps/2_0_2_none	none	0.05
IndivQLearningTabularSweepMillionSteps/3_0_3	centralized	True	-10	True	GridWorld	Pentagon	FullObsDiscrete	Individual_Q	1.0	0.05	1000000	3	True	IndivQLearningTabularSweepMillionSteps/3_0_3_centralized	centralized	0.05
IndivQLearningTabularSweepMillionSteps/3_0_3	centralized	True	-10	True	GridWorld	Pentagon	FullObsDiscrete	Individual_Q	1.0	0.05	1000000	3	True	IndivQLearningTabularSweepMillionSteps/3_0_3_decentralized	decentralized	0.05
IndivQLearningTabularSweepMillionSteps/3_0_3	centralized	True	-10	True	GridWorld	Pentagon	FullObsDiscrete	Individual_Q	1.0	0.05	1000000	3	True	IndivQLearningTabularSweepMillionSteps/3_0_3_none	none	0.05
IndivQLearningTabularSweepMillionSteps/4_0_4	centralized	True	-10	True	GridWorld	Pentagon	FullObsDiscrete	Individual_Q	1.0	0.05	1000000	4	True	IndivQLearningTabularSweepMillionSteps/4_0_4_centralized	centralized	0.05
IndivQLearningTabularSweepMillionSteps/4_0_4	centralized	True	-10	True	GridWorld	Pentagon	FullObsDiscrete	Individual_Q	1.0	0.05	1000000	4	True	IndivQLearningTabularSweepMillionSteps/4_0_4_decentralized	decentralized	0.05
IndivQLearningTabularSweepMillionSteps/4_0_4	centralized	True	-10	True	GridWorld	Pentagon	FullObsDiscrete	Individual_Q	1.0	0.05	1000000	4	True	IndivQLearningTabularSweepMillionSteps/4_0_4_none	none	0.05
IndivQLearningTabularSweepMillionSteps/5_0_5	centralized	True	-10	True	GridWorld	Pentagon	FullObsDiscrete	Individual_Q	1.0	0.05	1000000	5	True	IndivQLearningTabularSweepMillionSteps/5_0_5_centralized	centralized	0.05
IndivQLearningTabularSweepMillionSteps/5_0_5	centralized	True	-10	True	GridWorld	Pentagon	FullObsDiscrete	Individual_Q	1.0	0.05	1000000	5	True	IndivQLearningTabularSweepMillionSteps/5_0_5_decentralized	decentralized	0.05
IndivQLearningTabularSweepMillionSteps/5_0_5	centralized	True	-10	True	GridWorld	Pentagon	FullObsDiscrete	Individual_Q	1.0	0.05	1000000	5	True	IndivQLearningTabularSweepMillionSteps/5_0_5_none	none	0.05
IndivQLearningTabularSweepMillionSteps/6_0_6	centralized	True	-10	True	GridWorld	Pentagon	FullObsDiscrete	Individual_Q	1.0	0.05	1000000	6	True	IndivQLearningTabularSweepMillionSteps/6_0_6_centralized	centralized	0.05
IndivQLearningTabularSweepMillionSteps/6_0_6	centralized	True	-10	True	GridWorld	Pentagon	FullObsDiscrete	Individual_Q	1.0	0.05	1000000	6	True	IndivQLearningTabularSweepMillionSteps/6_0_6_decentralized	decentralized	0.05
IndivQLearningTabularSweepMillionSteps/6_0_6	centralized	True	-10	True	GridWorld	Pentagon	FullObsDiscrete	Individual_Q	1.0	0.05	1000000	6	True	IndivQLearningTabularSweepMillionSteps/6_0_6_none	none	0.05
IndivQLearningTabularSweepMillionSteps/7_0_7	centralized	True	-10	True	GridWorld	Pentagon	FullObsDiscrete	Individual_Q	1.0	0.05	1000000	7	True	IndivQLearningTabularSweepMillionSteps/7_0_7_centralized	centralized	0.05
IndivQLearningTabularSweepMillionSteps/7_0_7	centralized	True	-10	True	GridWorld	Pentagon	FullObsDiscrete	Individual_Q	1.0	0.05	1000000	7	True	IndivQLearningTabularSweepMillionSteps/7_0_7_decentralized	decentralized	0.05
IndivQLearningTabularSweepMillionSteps/7_0_7	centralized	True	-10	True	GridWorld	Pentagon	FullObsDiscrete	Individual_Q	1.0	0.05	1000000	7	True	IndivQLearningTabularSweepMillionSteps/7_0_7_none	none	0.05
IndivQLearningTabularSweepMillionSteps/8_0_8	centralized	True	-10	True	GridWorld	Pentagon	FullObsDiscrete	Individual_Q	1.0	0.05	1000000	8	True	IndivQLearningTabularSweepMillionSteps/8_0_8_centralized	centralized	0.05
IndivQLearningTabularSweepMillionSteps/8_0_8	centralized	True	-10	True	GridWorld	Pentagon	FullObsDiscrete	Individual_Q	1.0	0.05	1000000	8	True	IndivQLearningTabularSweepMillionSteps/8_0_8_decentralized	decentralized	0.05
IndivQLearningTabularSweepMillionSteps/8_0_8	centralized	True	-10	True	GridWorld	Pentagon	FullObsDiscrete	Individual_Q	1.0	0.05	1000000	8	True	IndivQLearningTabularSweepMillionSteps/8_0_8_none	none	0.05
IndivQLearningTabularSweepMillionSteps/9_0_9	centralized	True	-10	True	GridWorld	Pentagon	FullObsDiscrete	Individual_Q	1.0	0.05	1000000	9	True	IndivQLearningTabularSweepMillionSteps/9_0_9_centralized	centralized	0.05
IndivQLearningTabularSweepMillionSteps/9_0_9	centralized	True	-10	True	GridWorld	Pentagon	FullObsDiscrete	Individual_Q	1.0	0.05	1000000	9	True	IndivQLearningTabularSweepMillionSteps/9_0_9_decentralized	decentralized	0.05
IndivQLearningTabularSweepMillionSteps/9_0_9	centralized	True	-10	True	GridWorld	Pentagon	FullObsDiscrete	Individual_Q	1.0	0.05	1000000	9	True	IndivQLearningTabularSweepMillionSteps/9_0_9_none	none	0.05
IndivQLearningTabularSweepMillionSteps/10_1_0	decentralized	True	-10	True	GridWorld	Pentagon	FullObsDiscrete	Individual_Q	1.0	0.05	1000000	0	True	IndivQLearningTabularSweepMillionSteps/10_1_0_centralized	centralized	0.05
IndivQLearningTabularSweepMillionSteps/10_1_0	decentralized	True	-10	True	GridWorld	Pentagon	FullObsDiscrete	Individual_Q	1.0	0.05	1000000	0	True	IndivQLearningTabularSweepMillionSteps/10_1_0_decentralized	decentralized	0.05
IndivQLearningTabularSweepMillionSteps/10_1_0	decentralized	True	-10	True	GridWorld	Pentagon	FullObsDiscrete	Individual_Q	1.0	0.05	1000000	0	True	IndivQLearningTabularSweepMillionSteps/10_1_0_none	none	0.05
IndivQLearningTabularSweepMillionSteps/11_1_1	decentralized	True	-10	True	GridWorld	Pentagon	FullObsDiscrete	Individual_Q	1.0	0.05	1000000	1	True	IndivQLearningTabularSweepMillionSteps/11_1_1_centralized	centralized	0.05
IndivQLearningTabularSweepMillionSteps/11_1_1	decentralized	True	-10	True	GridWorld	Pentagon	FullObsDiscrete	Individual_Q	1.0	0.05	1000000	1	True	IndivQLearningTabularSweepMillionSteps/11_1_1_decentralized	decentralized	0.05
IndivQLearningTabularSweepMillionSteps/11_1_1	decentralized	True	-10	True	GridWorld	Pentagon	FullObsDiscrete	Individual_Q	1.0	0.05	1000000	1	True	IndivQLearningTabularSweepMillionSteps/11_1_1_none	none	0.05
IndivQLearningTabularSweepMillionSteps/12_1_2	decentralized	True	-10	True	GridWorld	Pentagon	FullObsDiscrete	Individual_Q	1.0	0.05	1000000	2	True	IndivQLearningTabularSweepMillionSteps/12_1_2_centralized	centralized	0.05
IndivQLearningTabularSweepMillionSteps/12_1_2	decentralized	True	-10	True	GridWorld	Pentagon	FullObsDiscrete	Individual_Q	1.0	0.05	1000000	2	True	IndivQLearningTabularSweepMillionSteps/12_1_2_decentralized	decentralized	0.05
IndivQLearningTabularSweepMillionSteps/12_1_2	decentralized	True	-10	True	GridWorld	Pentagon	FullObsDiscrete	Individual_Q	1.0	0.05	1000000	2	True	IndivQLearningTabularSweepMillionSteps/12_1_2_none	none	0.05
IndivQLearningTabularSweepMillionSteps/13_1_3	decentralized	True	-10	True	GridWorld	Pentagon	FullObsDiscrete	Individual_Q	1.0	0.05	1000000	3	True	IndivQLearningTabularSweepMillionSteps/13_1_3_centralized	centralized	0.05
IndivQLearningTabularSweepMillionSteps/13_1_3	decentralized	True	-10	True	GridWorld	Pentagon	FullObsDiscrete	Individual_Q	1.0	0.05	1000000	3	True	IndivQLearningTabularSweepMillionSteps/13_1_3_decentralized	decentralized	0.05
IndivQLearningTabularSweepMillionSteps/13_1_3	decentralized	True	-10	True	GridWorld	Pentagon	FullObsDiscrete	Individual_Q	1.0	0.05	1000000	3	True	IndivQLearningTabularSweepMillionSteps/13_1_3_none	none	0.05
IndivQLearningTabularSweepMillionSteps/14_1_4	decentralized	True	-10	True	GridWorld	Pentagon	FullObsDiscrete	Individual_Q	1.0	0.05	1000000	4	True	IndivQLearningTabularSweepMillionSteps/14_1_4_centralized	centralized	0.05
IndivQLearningTabularSweepMillionSteps/14_1_4	decentralized	True	-10	True	GridWorld	Pentagon	FullObsDiscrete	Individual_Q	1.0	0.05	1000000	4	True	IndivQLearningTabularSweepMillionSteps/14_1_4_decentralized	decentralized	0.05
IndivQLearningTabularSweepMillionSteps/14_1_4	decentralized	True	-10	True	GridWorld	Pentagon	FullObsDiscrete	Individual_Q	1.0	0.05	1000000	4	True	IndivQLearningTabularSweepMillionSteps/14_1_4_none	none	0.05
IndivQLearningTabularSweepMillionSteps/15_1_5	decentralized	True	-10	True	GridWorld	Pentagon	FullObsDiscrete	Individual_Q	1.0	0.05	1000000	5	True	IndivQLearningTabularSweepMillionSteps/15_1_5_centralized	centralized	0.05
IndivQLearningTabularSweepMillionSteps/15_1_5	decentralized	True	-10	True	GridWorld	Pentagon	FullObsDiscrete	Individual_Q	1.0	0.05	1000000	5	True	IndivQLearningTabularSweepMillionSteps/15_1_5_decentralized	decentralized	0.05
IndivQLearningTabularSweepMillionSteps/15_1_5	decentralized	True	-10	True	GridWorld	Pentagon	FullObsDiscrete	Individual_Q	1.0	0.05	1000000	5	True	IndivQLearningTabularSweepMillionSteps/15_1_5_none	none	0.05
IndivQLearningTabularSweepMillionSteps/16_1_6	decentralized	True	-10	True	GridWorld	Pentagon	FullObsDiscrete	Individual_Q	1.0	0.05	1000000	6	True	IndivQLearningTabularSweepMillionSteps/16_1_6_centralized	centralized	0.05
IndivQLearningTabularSweepMillionSteps/16_1_6	decentralized	True	-10	True	GridWorld	Pentagon	FullObsDiscrete	Individual_Q	1.0	0.05	1000000	6	True	IndivQLearningTabularSweepMillionSteps/16_1_6_decentralized	decentralized	0.05
IndivQLearningTabularSweepMillionSteps/16_1_6	decentralized	True	-10	True	GridWorld	Pentagon	FullObsDiscrete	Individual_Q	1.0	0.05	1000000	6	True	IndivQLearningTabularSweepMillionSteps/16_1_6_none	none	0.05
IndivQLearningTabularSweepMillionSteps/17_1_7	decentralized	True	-10	True	GridWorld	Pentagon	FullObsDiscrete	Individual_Q	1.0	0.05	1000000	7	True	IndivQLearningTabularSweepMillionSteps/17_1_7_centralized	centralized	0.05
IndivQLearningTabularSweepMillionSteps/17_1_7	decentralized	True	-10	True	GridWorld	Pentagon	FullObsDiscrete	Individual_Q	1.0	0.05	1000000	7	True	IndivQLearningTabularSweepMillionSteps/17_1_7_decentralized	decentralized	0.05
IndivQLearningTabularSweepMillionSteps/17_1_7	decentralized	True	-10	True	GridWorld	Pentagon	FullObsDiscrete	Individual_Q	1.0	0.05	1000000	7	True	IndivQLearningTabularSweepMillionSteps/17_1_7_none	none	0.05
IndivQLearningTabularSweepMillionSteps/18_1_8	decentralized	True	-10	True	GridWorld	Pentagon	FullObsDiscrete	Individual_Q	1.0	0.05	1000000	8	True	IndivQLearningTabularSweepMillionSteps/18_1_8_centralized	centralized	0.05
IndivQLearningTabularSweepMillionSteps/18_1_8	decentralized	True	-10	True	GridWorld	Pentagon	FullObsDiscrete	Individual_Q	1.0	0.05	1000000	8	True	IndivQLearningTabularSweepMillionSteps/18_1_8_decentralized	decentralized	0.05
IndivQLearningTabularSweepMillionSteps/18_1_8	decentralized	True	-10	True	GridWorld	Pentagon	FullObsDiscrete	Individual_Q	1.0	0.05	1000000	8	True	IndivQLearningTabularSweepMillionSteps/18_1_8_none	none	0.05
IndivQLearningTabularSweepMillionSteps/19_1_9	decentralized	True	-10	True	GridWorld	Pentagon	FullObsDiscrete	Individual_Q	1.0	0.05	1000000	9	True	IndivQLearningTabularSweepMillionSteps/19_1_9_centralized	centralized	0.05
IndivQLearningTabularSweepMillionSteps/19_1_9	decentralized	True	-10	True	GridWorld	Pentagon	FullObsDiscrete	Individual_Q	1.0	0.05	1000000	9	True	IndivQLearningTabularSweepMillionSteps/19_1_9_decentralized	decentralized	0.05
IndivQLearningTabularSweepMillionSteps/19_1_9	decentralized	True	-10	True	GridWorld	Pentagon	FullObsDiscrete	Individual_Q	1.0	0.05	1000000	9	True	IndivQLearningTabularSweepMillionSteps/19_1_9_none	none	0.05
IndivQLearningTabularSweepMillionSteps/20_2_0	none	True	-10	True	GridWorld	Pentagon	FullObsDiscrete	Individual_Q	1.0	0.05	1000000	0	True	IndivQLearningTabularSweepMillionSteps/20_2_0_centralized	centralized	0.05
IndivQLearningTabularSweepMillionSteps/20_2_0	none	True	-10	True	GridWorld	Pentagon	FullObsDiscrete	Individual_Q	1.0	0.05	1000000	0	True	IndivQLearningTabularSweepMillionSteps/20_2_0_decentralized	decentralized	0.05
IndivQLearningTabularSweepMillionSteps/20_2_0	none	True	-10	True	GridWorld	Pentagon	FullObsDiscrete	Individual_Q	1.0	0.05	1000000	0	True	IndivQLearningTabularSweepMillionSteps/20_2_0_none	none	0.05
IndivQLearningTabularSweepMillionSteps/21_2_1	none	True	-10	True	GridWorld	Pentagon	FullObsDiscrete	Individual_Q	1.0	0.05	1000000	1	True	IndivQLearningTabularSweepMillionSteps/21_2_1_centralized	centralized	0.05
IndivQLearningTabularSweepMillionSteps/21_2_1	none	True	-10	True	GridWorld	Pentagon	FullObsDiscrete	Individual_Q	1.0	0.05	1000000	1	True	IndivQLearningTabularSweepMillionSteps/21_2_1_decentralized	decentralized	0.05
IndivQLearningTabularSweepMillionSteps/21_2_1	none	True	-10	True	GridWorld	Pentagon	FullObsDiscrete	Individual_Q	1.0	0.05	1000000	1	True	IndivQLearningTabularSweepMillionSteps/21_2_1_none	none	0.05
IndivQLearningTabularSweepMillionSteps/22_2_2	none	True	-10	True	GridWorld	Pentagon	FullObsDiscrete	Individual_Q	1.0	0.05	1000000	2	True	IndivQLearningTabularSweepMillionSteps/22_2_2_centralized	centralized	0.05
IndivQLearningTabularSweepMillionSteps/22_2_2	none	True	-10	True	GridWorld	Pentagon	FullObsDiscrete	Individual_Q	1.0	0.05	1000000	2	True	IndivQLearningTabularSweepMillionSteps/22_2_2_decentralized	decentralized	0.05
IndivQLearningTabularSweepMillionSteps/22_2_2	none	True	-10	True	GridWorld	Pentagon	FullObsDiscrete	Individual_Q	1.0	0.05	1000000	2	True	IndivQLearningTabularSweepMillionSteps/22_2_2_none	none	0.05
IndivQLearningTabularSweepMillionSteps/23_2_3	none	True	-10	True	GridWorld	Pentagon	FullObsDiscrete	Individual_Q	1.0	0.05	1000000	3	True	IndivQLearningTabularSweepMillionSteps/23_2_3_centralized	centralized	0.05
IndivQLearningTabularSweepMillionSteps/23_2_3	none	True	-10	True	GridWorld	Pentagon	FullObsDiscrete	Individual_Q	1.0	0.05	1000000	3	True	IndivQLearningTabularSweepMillionSteps/23_2_3_decentralized	decentralized	0.05
IndivQLearningTabularSweepMillionSteps/23_2_3	none	True	-10	True	GridWorld	Pentagon	FullObsDiscrete	Individual_Q	1.0	0.05	1000000	3	True	IndivQLearningTabularSweepMillionSteps/23_2_3_none	none	0.05
IndivQLearningTabularSweepMillionSteps/24_2_4	none	True	-10	True	GridWorld	Pentagon	FullObsDiscrete	Individual_Q	1.0	0.05	1000000	4	True	IndivQLearningTabularSweepMillionSteps/24_2_4_centralized	centralized	0.05
IndivQLearningTabularSweepMillionSteps/24_2_4	none	True	-10	True	GridWorld	Pentagon	FullObsDiscrete	Individual_Q	1.0	0.05	1000000	4	True	IndivQLearningTabularSweepMillionSteps/24_2_4_decentralized	decentralized	0.05
IndivQLearningTabularSweepMillionSteps/24_2_4	none	True	-10	True	GridWorld	Pentagon	FullObsDiscrete	Individual_Q	1.0	0.05	1000000	4	True	IndivQLearningTabularSweepMillionSteps/24_2_4_none	none	0.05
IndivQLearningTabularSweepMillionSteps/25_2_5	none	True	-10	True	GridWorld	Pentagon	FullObsDiscrete	Individual_Q	1.0	0.05	1000000	5	True	IndivQLearningTabularSweepMillionSteps/25_2_5_centralized	centralized	0.05
IndivQLearningTabularSweepMillionSteps/25_2_5	none	True	-10	True	GridWorld	Pentagon	FullObsDiscrete	Individual_Q	1.0	0.05	1000000	5	True	IndivQLearningTabularSweepMillionSteps/25_2_5_decentralized	decentralized	0.05
IndivQLearningTabularSweepMillionSteps/25_2_5	none	True	-10	True	GridWorld	Pentagon	FullObsDiscrete	Individual_Q	1.0	0.05	1000000	5	True	IndivQLearningTabularSweepMillionSteps/25_2_5_none	none	0.05
IndivQLearningTabularSweepMillionSteps/26_2_6	none	True	-10	True	GridWorld	Pentagon	FullObsDiscrete	Individual_Q	1.0	0.05	1000000	6	True	IndivQLearningTabularSweepMillionSteps/26_2_6_centralized	centralized	0.05
IndivQLearningTabularSweepMillionSteps/26_2_6	none	True	-10	True	GridWorld	Pentagon	FullObsDiscrete	Individual_Q	1.0	0.05	1000000	6	True	IndivQLearningTabularSweepMillionSteps/26_2_6_decentralized	decentralized	0.05
IndivQLearningTabularSweepMillionSteps/26_2_6	none	True	-10	True	GridWorld	Pentagon	FullObsDiscrete	Individual_Q	1.0	0.05	1000000	6	True	IndivQLearningTabularSweepMillionSteps/26_2_6_none	none	0.05
IndivQLearningTabularSweepMillionSteps/27_2_7	none	True	-10	True	GridWorld	Pentagon	FullObsDiscrete	Individual_Q	1.0	0.05	1000000	7	True	IndivQLearningTabularSweepMillionSteps/27_2_7_centralized	centralized	0.05
IndivQLearningTabularSweepMillionSteps/27_2_7	none	True	-10	True	GridWorld	Pentagon	FullObsDiscrete	Individual_Q	1.0	0.05	1000000	7	True	IndivQLearningTabularSweepMillionSteps/27_2_7_decentralized	decentralized	0.05
IndivQLearningTabularSweepMillionSteps/27_2_7	none	True	-10	True	GridWorld	Pentagon	FullObsDiscrete	Individual_Q	1.0	0.05	1000000	7	True	IndivQLearningTabularSweepMillionSteps/27_2_7_none	none	0.05
IndivQLearningTabularSweepMillionSteps/28_2_8	none	True	-10	True	GridWorld	Pentagon	FullObsDiscrete	Individual_Q	1.0	0.05	1000000	8	True	IndivQLearningTabularSweepMillionSteps/28_2_8_centralized	centralized	0.05
IndivQLearningTabularSweepMillionSteps/28_2_8	none	True	-10	True	GridWorld	Pentagon	FullObsDiscrete	Individual_Q	1.0	0.05	1000000	8	True	IndivQLearningTabularSweepMillionSteps/28_2_8_decentralized	decentralized	0.05
IndivQLearningTabularSweepMillionSteps/28_2_8	none	True	-10	True	GridWorld	Pentagon	FullObsDiscrete	Individual_Q	1.0	0.05	1000000	8	True	IndivQLearningTabularSweepMillionSteps/28_2_8_none	none	0.05
IndivQLearningTabularSweepMillionSteps/29_2_9	none	True	-10	True	GridWorld	Pentagon	FullObsDiscrete	Individual_Q	1.0	0.05	1000000	9	True	IndivQLearningTabularSweepMillionSteps/29_2_9_centralized	centralized	0.05
IndivQLearningTabularSweepMillionSteps/29_2_9	none	True	-10	True	GridWorld	Pentagon	FullObsDiscrete	Individual_Q	1.0	0.05	1000000	9	True	IndivQLearningTabularSweepMillionSteps/29_2_9_decentralized	decentralized	0.05
IndivQLearningTabularSweepMillionSteps/29_2_9	none	True	-10	True	GridWorld	Pentagon	FullObsDiscrete	Individual_Q	1.0	0.05	1000000	9	True	IndivQLearningTabularSweepMillionSteps/29_2_9_none	none	0.05
IndivQLearningTabularSweepMillionSteps/30_3_0	centralized	True	-10	False	GridWorld	Pentagon	FullObsDiscrete	Individual_Q	1.0	0.05	1000000	0	True	IndivQLearningTabularSweepMillionSteps/30_3_0_centralized	centralized	0.05
IndivQLearningTabularSweepMillionSteps/30_3_0	centralized	True	-10	False	GridWorld	Pentagon	FullObsDiscrete	Individual_Q	1.0	0.05	1000000	0	True	IndivQLearningTabularSweepMillionSteps/30_3_0_decentralized	decentralized	0.05
IndivQLearningTabularSweepMillionSteps/30_3_0	centralized	True	-10	False	GridWorld	Pentagon	FullObsDiscrete	Individual_Q	1.0	0.05	1000000	0	True	IndivQLearningTabularSweepMillionSteps/30_3_0_none	none	0.05
IndivQLearningTabularSweepMillionSteps/31_3_1	centralized	True	-10	False	GridWorld	Pentagon	FullObsDiscrete	Individual_Q	1.0	0.05	1000000	1	True	IndivQLearningTabularSweepMillionSteps/31_3_1_centralized	centralized	0.05
IndivQLearningTabularSweepMillionSteps/31_3_1	centralized	True	-10	False	GridWorld	Pentagon	FullObsDiscrete	Individual_Q	1.0	0.05	1000000	1	True	IndivQLearningTabularSweepMillionSteps/31_3_1_decentralized	decentralized	0.05
IndivQLearningTabularSweepMillionSteps/31_3_1	centralized	True	-10	False	GridWorld	Pentagon	FullObsDiscrete	Individual_Q	1.0	0.05	1000000	1	True	IndivQLearningTabularSweepMillionSteps/31_3_1_none	none	0.05
IndivQLearningTabularSweepMillionSteps/32_3_2	centralized	True	-10	False	GridWorld	Pentagon	FullObsDiscrete	Individual_Q	1.0	0.05	1000000	2	True	IndivQLearningTabularSweepMillionSteps/32_3_2_centralized	centralized	0.05
IndivQLearningTabularSweepMillionSteps/32_3_2	centralized	True	-10	False	GridWorld	Pentagon	FullObsDiscrete	Individual_Q	1.0	0.05	1000000	2	True	IndivQLearningTabularSweepMillionSteps/32_3_2_decentralized	decentralized	0.05
IndivQLearningTabularSweepMillionSteps/32_3_2	centralized	True	-10	False	GridWorld	Pentagon	FullObsDiscrete	Individual_Q	1.0	0.05	1000000	2	True	IndivQLearningTabularSweepMillionSteps/32_3_2_none	none	0.05
IndivQLearningTabularSweepMillionSteps/33_3_3	centralized	True	-10	False	GridWorld	Pentagon	FullObsDiscrete	Individual_Q	1.0	0.05	1000000	3	True	IndivQLearningTabularSweepMillionSteps/33_3_3_centralized	centralized	0.05
IndivQLearningTabularSweepMillionSteps/33_3_3	centralized	True	-10	False	GridWorld	Pentagon	FullObsDiscrete	Individual_Q	1.0	0.05	1000000	3	True	IndivQLearningTabularSweepMillionSteps/33_3_3_decentralized	decentralized	0.05
IndivQLearningTabularSweepMillionSteps/33_3_3	centralized	True	-10	False	GridWorld	Pentagon	FullObsDiscrete	Individual_Q	1.0	0.05	1000000	3	True	IndivQLearningTabularSweepMillionSteps/33_3_3_none	none	0.05
IndivQLearningTabularSweepMillionSteps/34_3_4	centralized	True	-10	False	GridWorld	Pentagon	FullObsDiscrete	Individual_Q	1.0	0.05	1000000	4	True	IndivQLearningTabularSweepMillionSteps/34_3_4_centralized	centralized	0.05
IndivQLearningTabularSweepMillionSteps/34_3_4	centralized	True	-10	False	GridWorld	Pentagon	FullObsDiscrete	Individual_Q	1.0	0.05	1000000	4	True	IndivQLearningTabularSweepMillionSteps/34_3_4_decentralized	decentralized	0.05
IndivQLearningTabularSweepMillionSteps/34_3_4	centralized	True	-10	False	GridWorld	Pentagon	FullObsDiscrete	Individual_Q	1.0	0.05	1000000	4	True	IndivQLearningTabularSweepMillionSteps/34_3_4_none	none	0.05
IndivQLearningTabularSweepMillionSteps/35_3_5	centralized	True	-10	False	GridWorld	Pentagon	FullObsDiscrete	Individual_Q	1.0	0.05	1000000	5	True	IndivQLearningTabularSweepMillionSteps/35_3_5_centralized	centralized	0.05
IndivQLearningTabularSweepMillionSteps/35_3_5	centralized	True	-10	False	GridWorld	Pentagon	FullObsDiscrete	Individual_Q	1.0	0.05	1000000	5	True	IndivQLearningTabularSweepMillionSteps/35_3_5_decentralized	decentralized	0.05
IndivQLearningTabularSweepMillionSteps/35_3_5	centralized	True	-10	False	GridWorld	Pentagon	FullObsDiscrete	Individual_Q	1.0	0.05	1000000	5	True	IndivQLearningTabularSweepMillionSteps/35_3_5_none	none	0.05
IndivQLearningTabularSweepMillionSteps/36_3_6	centralized	True	-10	False	GridWorld	Pentagon	FullObsDiscrete	Individual_Q	1.0	0.05	1000000	6	True	IndivQLearningTabularSweepMillionSteps/36_3_6_centralized	centralized	0.05
IndivQLearningTabularSweepMillionSteps/36_3_6	centralized	True	-10	False	GridWorld	Pentagon	FullObsDiscrete	Individual_Q	1.0	0.05	1000000	6	True	IndivQLearningTabularSweepMillionSteps/36_3_6_decentralized	decentralized	0.05
IndivQLearningTabularSweepMillionSteps/36_3_6	centralized	True	-10	False	GridWorld	Pentagon	FullObsDiscrete	Individual_Q	1.0	0.05	1000000	6	True	IndivQLearningTabularSweepMillionSteps/36_3_6_none	none	0.05
IndivQLearningTabularSweepMillionSteps/37_3_7	centralized	True	-10	False	GridWorld	Pentagon	FullObsDiscrete	Individual_Q	1.0	0.05	1000000	7	True	IndivQLearningTabularSweepMillionSteps/37_3_7_centralized	centralized	0.05
IndivQLearningTabularSweepMillionSteps/37_3_7	centralized	True	-10	False	GridWorld	Pentagon	FullObsDiscrete	Individual_Q	1.0	0.05	1000000	7	True	IndivQLearningTabularSweepMillionSteps/37_3_7_decentralized	decentralized	0.05
IndivQLearningTabularSweepMillionSteps/37_3_7	centralized	True	-10	False	GridWorld	Pentagon	FullObsDiscrete	Individual_Q	1.0	0.05	1000000	7	True	IndivQLearningTabularSweepMillionSteps/37_3_7_none	none	0.05
IndivQLearningTabularSweepMillionSteps/38_3_8	centralized	True	-10	False	GridWorld	Pentagon	FullObsDiscrete	Individual_Q	1.0	0.05	1000000	8	True	IndivQLearningTabularSweepMillionSteps/38_3_8_centralized	centralized	0.05
IndivQLearningTabularSweepMillionSteps/38_3_8	centralized	True	-10	False	GridWorld	Pentagon	FullObsDiscrete	Individual_Q	1.0	0.05	1000000	8	True	IndivQLearningTabularSweepMillionSteps/38_3_8_decentralized	decentralized	0.05
IndivQLearningTabularSweepMillionSteps/38_3_8	centralized	True	-10	False	GridWorld	Pentagon	FullObsDiscrete	Individual_Q	1.0	0.05	1000000	8	True	IndivQLearningTabularSweepMillionSteps/38_3_8_none	none	0.05
IndivQLearningTabularSweepMillionSteps/39_3_9	centralized	True	-10	False	GridWorld	Pentagon	FullObsDiscrete	Individual_Q	1.0	0.05	1000000	9	True	IndivQLearningTabularSweepMillionSteps/39_3_9_centralized	centralized	0.05
IndivQLearningTabularSweepMillionSteps/39_3_9	centralized	True	-10	False	GridWorld	Pentagon	FullObsDiscrete	Individual_Q	1.0	0.05	1000000	9	True	IndivQLearningTabularSweepMillionSteps/39_3_9_decentralized	decentralized	0.05
IndivQLearningTabularSweepMillionSteps/39_3_9	centralized	True	-10	False	GridWorld	Pentagon	FullObsDiscrete	Individual_Q	1.0	0.05	1000000	9	True	IndivQLearningTabularSweepMillionSteps/39_3_9_none	none	0.05
IndivQLearningTabularSweepMillionSteps/40_4_0	decentralized	True	-10	False	GridWorld	Pentagon	FullObsDiscrete	Individual_Q	1.0	0.05	1000000	0	True	IndivQLearningTabularSweepMillionSteps/40_4_0_centralized	centralized	0.05
IndivQLearningTabularSweepMillionSteps/40_4_0	decentralized	True	-10	False	GridWorld	Pentagon	FullObsDiscrete	Individual_Q	1.0	0.05	1000000	0	True	IndivQLearningTabularSweepMillionSteps/40_4_0_decentralized	decentralized	0.05
IndivQLearningTabularSweepMillionSteps/40_4_0	decentralized	True	-10	False	GridWorld	Pentagon	FullObsDiscrete	Individual_Q	1.0	0.05	1000000	0	True	IndivQLearningTabularSweepMillionSteps/40_4_0_none	none	0.05
IndivQLearningTabularSweepMillionSteps/41_4_1	decentralized	True	-10	False	GridWorld	Pentagon	FullObsDiscrete	Individual_Q	1.0	0.05	1000000	1	True	IndivQLearningTabularSweepMillionSteps/41_4_1_centralized	centralized	0.05
IndivQLearningTabularSweepMillionSteps/41_4_1	decentralized	True	-10	False	GridWorld	Pentagon	FullObsDiscrete	Individual_Q	1.0	0.05	1000000	1	True	IndivQLearningTabularSweepMillionSteps/41_4_1_decentralized	decentralized	0.05
IndivQLearningTabularSweepMillionSteps/41_4_1	decentralized	True	-10	False	GridWorld	Pentagon	FullObsDiscrete	Individual_Q	1.0	0.05	1000000	1	True	IndivQLearningTabularSweepMillionSteps/41_4_1_none	none	0.05
IndivQLearningTabularSweepMillionSteps/42_4_2	decentralized	True	-10	False	GridWorld	Pentagon	FullObsDiscrete	Individual_Q	1.0	0.05	1000000	2	True	IndivQLearningTabularSweepMillionSteps/42_4_2_centralized	centralized	0.05
IndivQLearningTabularSweepMillionSteps/42_4_2	decentralized	True	-10	False	GridWorld	Pentagon	FullObsDiscrete	Individual_Q	1.0	0.05	1000000	2	True	IndivQLearningTabularSweepMillionSteps/42_4_2_decentralized	decentralized	0.05
IndivQLearningTabularSweepMillionSteps/42_4_2	decentralized	True	-10	False	GridWorld	Pentagon	FullObsDiscrete	Individual_Q	1.0	0.05	1000000	2	True	IndivQLearningTabularSweepMillionSteps/42_4_2_none	none	0.05
IndivQLearningTabularSweepMillionSteps/43_4_3	decentralized	True	-10	False	GridWorld	Pentagon	FullObsDiscrete	Individual_Q	1.0	0.05	1000000	3	True	IndivQLearningTabularSweepMillionSteps/43_4_3_centralized	centralized	0.05
IndivQLearningTabularSweepMillionSteps/43_4_3	decentralized	True	-10	False	GridWorld	Pentagon	FullObsDiscrete	Individual_Q	1.0	0.05	1000000	3	True	IndivQLearningTabularSweepMillionSteps/43_4_3_decentralized	decentralized	0.05
IndivQLearningTabularSweepMillionSteps/43_4_3	decentralized	True	-10	False	GridWorld	Pentagon	FullObsDiscrete	Individual_Q	1.0	0.05	1000000	3	True	IndivQLearningTabularSweepMillionSteps/43_4_3_none	none	0.05
IndivQLearningTabularSweepMillionSteps/44_4_4	decentralized	True	-10	False	GridWorld	Pentagon	FullObsDiscrete	Individual_Q	1.0	0.05	1000000	4	True	IndivQLearningTabularSweepMillionSteps/44_4_4_centralized	centralized	0.05
IndivQLearningTabularSweepMillionSteps/44_4_4	decentralized	True	-10	False	GridWorld	Pentagon	FullObsDiscrete	Individual_Q	1.0	0.05	1000000	4	True	IndivQLearningTabularSweepMillionSteps/44_4_4_decentralized	decentralized	0.05
IndivQLearningTabularSweepMillionSteps/44_4_4	decentralized	True	-10	False	GridWorld	Pentagon	FullObsDiscrete	Individual_Q	1.0	0.05	1000000	4	True	IndivQLearningTabularSweepMillionSteps/44_4_4_none	none	0.05
IndivQLearningTabularSweepMillionSteps/45_4_5	decentralized	True	-10	False	GridWorld	Pentagon	FullObsDiscrete	Individual_Q	1.0	0.05	1000000	5	True	IndivQLearningTabularSweepMillionSteps/45_4_5_centralized	centralized	0.05
IndivQLearningTabularSweepMillionSteps/45_4_5	decentralized	True	-10	False	GridWorld	Pentagon	FullObsDiscrete	Individual_Q	1.0	0.05	1000000	5	True	IndivQLearningTabularSweepMillionSteps/45_4_5_decentralized	decentralized	0.05
IndivQLearningTabularSweepMillionSteps/45_4_5	decentralized	True	-10	False	GridWorld	Pentagon	FullObsDiscrete	Individual_Q	1.0	0.05	1000000	5	True	IndivQLearningTabularSweepMillionSteps/45_4_5_none	none	0.05
IndivQLearningTabularSweepMillionSteps/46_4_6	decentralized	True	-10	False	GridWorld	Pentagon	FullObsDiscrete	Individual_Q	1.0	0.05	1000000	6	True	IndivQLearningTabularSweepMillionSteps/46_4_6_centralized	centralized	0.05
IndivQLearningTabularSweepMillionSteps/46_4_6	decentralized	True	-10	False	GridWorld	Pentagon	FullObsDiscrete	Individual_Q	1.0	0.05	1000000	6	True	IndivQLearningTabularSweepMillionSteps/46_4_6_decentralized	decentralized	0.05
IndivQLearningTabularSweepMillionSteps/46_4_6	decentralized	True	-10	False	GridWorld	Pentagon	FullObsDiscrete	Individual_Q	1.0	0.05	1000000	6	True	IndivQLearningTabularSweepMillionSteps/46_4_6_none	none	0.05
IndivQLearningTabularSweepMillionSteps/47_4_7	decentralized	True	-10	False	GridWorld	Pentagon	FullObsDiscrete	Individual_Q	1.0	0.05	1000000	7	True	IndivQLearningTabularSweepMillionSteps/47_4_7_centralized	centralized	0.05
IndivQLearningTabularSweepMillionSteps/47_4_7	decentralized	True	-10	False	GridWorld	Pentagon	FullObsDiscrete	Individual_Q	1.0	0.05	1000000	7	True	IndivQLearningTabularSweepMillionSteps/47_4_7_decentralized	decentralized	0.05
IndivQLearningTabularSweepMillionSteps/47_4_7	decentralized	True	-10	False	GridWorld	Pentagon	FullObsDiscrete	Individual_Q	1.0	0.05	1000000	7	True	IndivQLearningTabularSweepMillionSteps/47_4_7_none	none	0.05
IndivQLearningTabularSweepMillionSteps/48_4_8	decentralized	True	-10	False	GridWorld	Pentagon	FullObsDiscrete	Individual_Q	1.0	0.05	1000000	8	True	IndivQLearningTabularSweepMillionSteps/48_4_8_centralized	centralized	0.05
IndivQLearningTabularSweepMillionSteps/48_4_8	decentralized	True	-10	False	GridWorld	Pentagon	FullObsDiscrete	Individual_Q	1.0	0.05	1000000	8	True	IndivQLearningTabularSweepMillionSteps/48_4_8_decentralized	decentralized	0.05
IndivQLearningTabularSweepMillionSteps/48_4_8	decentralized	True	-10	False	GridWorld	Pentagon	FullObsDiscrete	Individual_Q	1.0	0.05	1000000	8	True	IndivQLearningTabularSweepMillionSteps/48_4_8_none	none	0.05
IndivQLearningTabularSweepMillionSteps/49_4_9	decentralized	True	-10	False	GridWorld	Pentagon	FullObsDiscrete	Individual_Q	1.0	0.05	1000000	9	True	IndivQLearningTabularSweepMillionSteps/49_4_9_centralized	centralized	0.05
IndivQLearningTabularSweepMillionSteps/49_4_9	decentralized	True	-10	False	GridWorld	Pentagon	FullObsDiscrete	Individual_Q	1.0	0.05	1000000	9	True	IndivQLearningTabularSweepMillionSteps/49_4_9_decentralized	decentralized	0.05
IndivQLearningTabularSweepMillionSteps/49_4_9	decentralized	True	-10	False	GridWorld	Pentagon	FullObsDiscrete	Individual_Q	1.0	0.05	1000000	9	True	IndivQLearningTabularSweepMillionSteps/49_4_9_none	none	0.05
IndivQLearningTabularSweepMillionSteps/50_5_0	none	True	-10	False	GridWorld	Pentagon	FullObsDiscrete	Individual_Q	1.0	0.05	1000000	0	True	IndivQLearningTabularSweepMillionSteps/50_5_0_centralized	centralized	0.05
IndivQLearningTabularSweepMillionSteps/50_5_0	none	True	-10	False	GridWorld	Pentagon	FullObsDiscrete	Individual_Q	1.0	0.05	1000000	0	True	IndivQLearningTabularSweepMillionSteps/50_5_0_decentralized	decentralized	0.05
IndivQLearningTabularSweepMillionSteps/50_5_0	none	True	-10	False	GridWorld	Pentagon	FullObsDiscrete	Individual_Q	1.0	0.05	1000000	0	True	IndivQLearningTabularSweepMillionSteps/50_5_0_none	none	0.05
IndivQLearningTabularSweepMillionSteps/51_5_1	none	True	-10	False	GridWorld	Pentagon	FullObsDiscrete	Individual_Q	1.0	0.05	1000000	1	True	IndivQLearningTabularSweepMillionSteps/51_5_1_centralized	centralized	0.05
IndivQLearningTabularSweepMillionSteps/51_5_1	none	True	-10	False	GridWorld	Pentagon	FullObsDiscrete	Individual_Q	1.0	0.05	1000000	1	True	IndivQLearningTabularSweepMillionSteps/51_5_1_decentralized	decentralized	0.05
IndivQLearningTabularSweepMillionSteps/51_5_1	none	True	-10	False	GridWorld	Pentagon	FullObsDiscrete	Individual_Q	1.0	0.05	1000000	1	True	IndivQLearningTabularSweepMillionSteps/51_5_1_none	none	0.05
IndivQLearningTabularSweepMillionSteps/52_5_2	none	True	-10	False	GridWorld	Pentagon	FullObsDiscrete	Individual_Q	1.0	0.05	1000000	2	True	IndivQLearningTabularSweepMillionSteps/52_5_2_centralized	centralized	0.05
IndivQLearningTabularSweepMillionSteps/52_5_2	none	True	-10	False	GridWorld	Pentagon	FullObsDiscrete	Individual_Q	1.0	0.05	1000000	2	True	IndivQLearningTabularSweepMillionSteps/52_5_2_decentralized	decentralized	0.05
IndivQLearningTabularSweepMillionSteps/52_5_2	none	True	-10	False	GridWorld	Pentagon	FullObsDiscrete	Individual_Q	1.0	0.05	1000000	2	True	IndivQLearningTabularSweepMillionSteps/52_5_2_none	none	0.05
IndivQLearningTabularSweepMillionSteps/53_5_3	none	True	-10	False	GridWorld	Pentagon	FullObsDiscrete	Individual_Q	1.0	0.05	1000000	3	True	IndivQLearningTabularSweepMillionSteps/53_5_3_centralized	centralized	0.05
IndivQLearningTabularSweepMillionSteps/53_5_3	none	True	-10	False	GridWorld	Pentagon	FullObsDiscrete	Individual_Q	1.0	0.05	1000000	3	True	IndivQLearningTabularSweepMillionSteps/53_5_3_decentralized	decentralized	0.05
IndivQLearningTabularSweepMillionSteps/53_5_3	none	True	-10	False	GridWorld	Pentagon	FullObsDiscrete	Individual_Q	1.0	0.05	1000000	3	True	IndivQLearningTabularSweepMillionSteps/53_5_3_none	none	0.05
IndivQLearningTabularSweepMillionSteps/54_5_4	none	True	-10	False	GridWorld	Pentagon	FullObsDiscrete	Individual_Q	1.0	0.05	1000000	4	True	IndivQLearningTabularSweepMillionSteps/54_5_4_centralized	centralized	0.05
IndivQLearningTabularSweepMillionSteps/54_5_4	none	True	-10	False	GridWorld	Pentagon	FullObsDiscrete	Individual_Q	1.0	0.05	1000000	4	True	IndivQLearningTabularSweepMillionSteps/54_5_4_decentralized	decentralized	0.05
IndivQLearningTabularSweepMillionSteps/54_5_4	none	True	-10	False	GridWorld	Pentagon	FullObsDiscrete	Individual_Q	1.0	0.05	1000000	4	True	IndivQLearningTabularSweepMillionSteps/54_5_4_none	none	0.05
IndivQLearningTabularSweepMillionSteps/55_5_5	none	True	-10	False	GridWorld	Pentagon	FullObsDiscrete	Individual_Q	1.0	0.05	1000000	5	True	IndivQLearningTabularSweepMillionSteps/55_5_5_centralized	centralized	0.05
IndivQLearningTabularSweepMillionSteps/55_5_5	none	True	-10	False	GridWorld	Pentagon	FullObsDiscrete	Individual_Q	1.0	0.05	1000000	5	True	IndivQLearningTabularSweepMillionSteps/55_5_5_decentralized	decentralized	0.05
IndivQLearningTabularSweepMillionSteps/55_5_5	none	True	-10	False	GridWorld	Pentagon	FullObsDiscrete	Individual_Q	1.0	0.05	1000000	5	True	IndivQLearningTabularSweepMillionSteps/55_5_5_none	none	0.05
IndivQLearningTabularSweepMillionSteps/56_5_6	none	True	-10	False	GridWorld	Pentagon	FullObsDiscrete	Individual_Q	1.0	0.05	1000000	6	True	IndivQLearningTabularSweepMillionSteps/56_5_6_centralized	centralized	0.05
IndivQLearningTabularSweepMillionSteps/56_5_6	none	True	-10	False	GridWorld	Pentagon	FullObsDiscrete	Individual_Q	1.0	0.05	1000000	6	True	IndivQLearningTabularSweepMillionSteps/56_5_6_decentralized	decentralized	0.05
IndivQLearningTabularSweepMillionSteps/56_5_6	none	True	-10	False	GridWorld	Pentagon	FullObsDiscrete	Individual_Q	1.0	0.05	1000000	6	True	IndivQLearningTabularSweepMillionSteps/56_5_6_none	none	0.05
IndivQLearningTabularSweepMillionSteps/57_5_7	none	True	-10	False	GridWorld	Pentagon	FullObsDiscrete	Individual_Q	1.0	0.05	1000000	7	True	IndivQLearningTabularSweepMillionSteps/57_5_7_centralized	centralized	0.05
IndivQLearningTabularSweepMillionSteps/57_5_7	none	True	-10	False	GridWorld	Pentagon	FullObsDiscrete	Individual_Q	1.0	0.05	1000000	7	True	IndivQLearningTabularSweepMillionSteps/57_5_7_decentralized	decentralized	0.05
IndivQLearningTabularSweepMillionSteps/57_5_7	none	True	-10	False	GridWorld	Pentagon	FullObsDiscrete	Individual_Q	1.0	0.05	1000000	7	True	IndivQLearningTabularSweepMillionSteps/57_5_7_none	none	0.05
IndivQLearningTabularSweepMillionSteps/58_5_8	none	True	-10	False	GridWorld	Pentagon	FullObsDiscrete	Individual_Q	1.0	0.05	1000000	8	True	IndivQLearningTabularSweepMillionSteps/58_5_8_centralized	centralized	0.05
IndivQLearningTabularSweepMillionSteps/58_5_8	none	True	-10	False	GridWorld	Pentagon	FullObsDiscrete	Individual_Q	1.0	0.05	1000000	8	True	IndivQLearningTabularSweepMillionSteps/58_5_8_decentralized	decentralized	0.05
IndivQLearningTabularSweepMillionSteps/58_5_8	none	True	-10	False	GridWorld	Pentagon	FullObsDiscrete	Individual_Q	1.0	0.05	1000000	8	True	IndivQLearningTabularSweepMillionSteps/58_5_8_none	none	0.05
IndivQLearningTabularSweepMillionSteps/59_5_9	none	True	-10	False	GridWorld	Pentagon	FullObsDiscrete	Individual_Q	1.0	0.05	1000000	9	True	IndivQLearningTabularSweepMillionSteps/59_5_9_centralized	centralized	0.05
IndivQLearningTabularSweepMillionSteps/59_5_9	none	True	-10	False	GridWorld	Pentagon	FullObsDiscrete	Individual_Q	1.0	0.05	1000000	9	True	IndivQLearningTabularSweepMillionSteps/59_5_9_decentralized	decentralized	0.05
IndivQLearningTabularSweepMillionSteps/59_5_9	none	True	-10	False	GridWorld	Pentagon	FullObsDiscrete	Individual_Q	1.0	0.05	1000000	9	True	IndivQLearningTabularSweepMillionSteps/59_5_9_none	none	0.05
IndivQLearningTabularSweepMillionSteps/60_6_0	centralized	True	-10	True	GridWorld	ISR	FullObsDiscrete	Individual_Q	1.0	0.05	1000000	0	True	IndivQLearningTabularSweepMillionSteps/60_6_0_centralized	centralized	0.05
IndivQLearningTabularSweepMillionSteps/60_6_0	centralized	True	-10	True	GridWorld	ISR	FullObsDiscrete	Individual_Q	1.0	0.05	1000000	0	True	IndivQLearningTabularSweepMillionSteps/60_6_0_decentralized	decentralized	0.05
IndivQLearningTabularSweepMillionSteps/60_6_0	centralized	True	-10	True	GridWorld	ISR	FullObsDiscrete	Individual_Q	1.0	0.05	1000000	0	True	IndivQLearningTabularSweepMillionSteps/60_6_0_none	none	0.05
IndivQLearningTabularSweepMillionSteps/61_6_1	centralized	True	-10	True	GridWorld	ISR	FullObsDiscrete	Individual_Q	1.0	0.05	1000000	1	True	IndivQLearningTabularSweepMillionSteps/61_6_1_centralized	centralized	0.05
IndivQLearningTabularSweepMillionSteps/61_6_1	centralized	True	-10	True	GridWorld	ISR	FullObsDiscrete	Individual_Q	1.0	0.05	1000000	1	True	IndivQLearningTabularSweepMillionSteps/61_6_1_decentralized	decentralized	0.05
IndivQLearningTabularSweepMillionSteps/61_6_1	centralized	True	-10	True	GridWorld	ISR	FullObsDiscrete	Individual_Q	1.0	0.05	1000000	1	True	IndivQLearningTabularSweepMillionSteps/61_6_1_none	none	0.05
IndivQLearningTabularSweepMillionSteps/62_6_2	centralized	True	-10	True	GridWorld	ISR	FullObsDiscrete	Individual_Q	1.0	0.05	1000000	2	True	IndivQLearningTabularSweepMillionSteps/62_6_2_centralized	centralized	0.05
IndivQLearningTabularSweepMillionSteps/62_6_2	centralized	True	-10	True	GridWorld	ISR	FullObsDiscrete	Individual_Q	1.0	0.05	1000000	2	True	IndivQLearningTabularSweepMillionSteps/62_6_2_decentralized	decentralized	0.05
IndivQLearningTabularSweepMillionSteps/62_6_2	centralized	True	-10	True	GridWorld	ISR	FullObsDiscrete	Individual_Q	1.0	0.05	1000000	2	True	IndivQLearningTabularSweepMillionSteps/62_6_2_none	none	0.05
IndivQLearningTabularSweepMillionSteps/63_6_3	centralized	True	-10	True	GridWorld	ISR	FullObsDiscrete	Individual_Q	1.0	0.05	1000000	3	True	IndivQLearningTabularSweepMillionSteps/63_6_3_centralized	centralized	0.05
IndivQLearningTabularSweepMillionSteps/63_6_3	centralized	True	-10	True	GridWorld	ISR	FullObsDiscrete	Individual_Q	1.0	0.05	1000000	3	True	IndivQLearningTabularSweepMillionSteps/63_6_3_decentralized	decentralized	0.05
IndivQLearningTabularSweepMillionSteps/63_6_3	centralized	True	-10	True	GridWorld	ISR	FullObsDiscrete	Individual_Q	1.0	0.05	1000000	3	True	IndivQLearningTabularSweepMillionSteps/63_6_3_none	none	0.05
IndivQLearningTabularSweepMillionSteps/64_6_4	centralized	True	-10	True	GridWorld	ISR	FullObsDiscrete	Individual_Q	1.0	0.05	1000000	4	True	IndivQLearningTabularSweepMillionSteps/64_6_4_centralized	centralized	0.05
IndivQLearningTabularSweepMillionSteps/64_6_4	centralized	True	-10	True	GridWorld	ISR	FullObsDiscrete	Individual_Q	1.0	0.05	1000000	4	True	IndivQLearningTabularSweepMillionSteps/64_6_4_decentralized	decentralized	0.05
IndivQLearningTabularSweepMillionSteps/64_6_4	centralized	True	-10	True	GridWorld	ISR	FullObsDiscrete	Individual_Q	1.0	0.05	1000000	4	True	IndivQLearningTabularSweepMillionSteps/64_6_4_none	none	0.05
IndivQLearningTabularSweepMillionSteps/65_6_5	centralized	True	-10	True	GridWorld	ISR	FullObsDiscrete	Individual_Q	1.0	0.05	1000000	5	True	IndivQLearningTabularSweepMillionSteps/65_6_5_centralized	centralized	0.05
IndivQLearningTabularSweepMillionSteps/65_6_5	centralized	True	-10	True	GridWorld	ISR	FullObsDiscrete	Individual_Q	1.0	0.05	1000000	5	True	IndivQLearningTabularSweepMillionSteps/65_6_5_decentralized	decentralized	0.05
IndivQLearningTabularSweepMillionSteps/65_6_5	centralized	True	-10	True	GridWorld	ISR	FullObsDiscrete	Individual_Q	1.0	0.05	1000000	5	True	IndivQLearningTabularSweepMillionSteps/65_6_5_none	none	0.05
IndivQLearningTabularSweepMillionSteps/66_6_6	centralized	True	-10	True	GridWorld	ISR	FullObsDiscrete	Individual_Q	1.0	0.05	1000000	6	True	IndivQLearningTabularSweepMillionSteps/66_6_6_centralized	centralized	0.05
IndivQLearningTabularSweepMillionSteps/66_6_6	centralized	True	-10	True	GridWorld	ISR	FullObsDiscrete	Individual_Q	1.0	0.05	1000000	6	True	IndivQLearningTabularSweepMillionSteps/66_6_6_decentralized	decentralized	0.05
IndivQLearningTabularSweepMillionSteps/66_6_6	centralized	True	-10	True	GridWorld	ISR	FullObsDiscrete	Individual_Q	1.0	0.05	1000000	6	True	IndivQLearningTabularSweepMillionSteps/66_6_6_none	none	0.05
IndivQLearningTabularSweepMillionSteps/67_6_7	centralized	True	-10	True	GridWorld	ISR	FullObsDiscrete	Individual_Q	1.0	0.05	1000000	7	True	IndivQLearningTabularSweepMillionSteps/67_6_7_centralized	centralized	0.05
IndivQLearningTabularSweepMillionSteps/67_6_7	centralized	True	-10	True	GridWorld	ISR	FullObsDiscrete	Individual_Q	1.0	0.05	1000000	7	True	IndivQLearningTabularSweepMillionSteps/67_6_7_decentralized	decentralized	0.05
IndivQLearningTabularSweepMillionSteps/67_6_7	centralized	True	-10	True	GridWorld	ISR	FullObsDiscrete	Individual_Q	1.0	0.05	1000000	7	True	IndivQLearningTabularSweepMillionSteps/67_6_7_none	none	0.05
IndivQLearningTabularSweepMillionSteps/68_6_8	centralized	True	-10	True	GridWorld	ISR	FullObsDiscrete	Individual_Q	1.0	0.05	1000000	8	True	IndivQLearningTabularSweepMillionSteps/68_6_8_centralized	centralized	0.05
IndivQLearningTabularSweepMillionSteps/68_6_8	centralized	True	-10	True	GridWorld	ISR	FullObsDiscrete	Individual_Q	1.0	0.05	1000000	8	True	IndivQLearningTabularSweepMillionSteps/68_6_8_decentralized	decentralized	0.05
IndivQLearningTabularSweepMillionSteps/68_6_8	centralized	True	-10	True	GridWorld	ISR	FullObsDiscrete	Individual_Q	1.0	0.05	1000000	8	True	IndivQLearningTabularSweepMillionSteps/68_6_8_none	none	0.05
IndivQLearningTabularSweepMillionSteps/69_6_9	centralized	True	-10	True	GridWorld	ISR	FullObsDiscrete	Individual_Q	1.0	0.05	1000000	9	True	IndivQLearningTabularSweepMillionSteps/69_6_9_centralized	centralized	0.05
IndivQLearningTabularSweepMillionSteps/69_6_9	centralized	True	-10	True	GridWorld	ISR	FullObsDiscrete	Individual_Q	1.0	0.05	1000000	9	True	IndivQLearningTabularSweepMillionSteps/69_6_9_decentralized	decentralized	0.05
IndivQLearningTabularSweepMillionSteps/69_6_9	centralized	True	-10	True	GridWorld	ISR	FullObsDiscrete	Individual_Q	1.0	0.05	1000000	9	True	IndivQLearningTabularSweepMillionSteps/69_6_9_none	none	0.05
IndivQLearningTabularSweepMillionSteps/70_7_0	decentralized	True	-10	True	GridWorld	ISR	FullObsDiscrete	Individual_Q	1.0	0.05	1000000	0	True	IndivQLearningTabularSweepMillionSteps/70_7_0_centralized	centralized	0.05
IndivQLearningTabularSweepMillionSteps/70_7_0	decentralized	True	-10	True	GridWorld	ISR	FullObsDiscrete	Individual_Q	1.0	0.05	1000000	0	True	IndivQLearningTabularSweepMillionSteps/70_7_0_decentralized	decentralized	0.05
IndivQLearningTabularSweepMillionSteps/70_7_0	decentralized	True	-10	True	GridWorld	ISR	FullObsDiscrete	Individual_Q	1.0	0.05	1000000	0	True	IndivQLearningTabularSweepMillionSteps/70_7_0_none	none	0.05
IndivQLearningTabularSweepMillionSteps/71_7_1	decentralized	True	-10	True	GridWorld	ISR	FullObsDiscrete	Individual_Q	1.0	0.05	1000000	1	True	IndivQLearningTabularSweepMillionSteps/71_7_1_centralized	centralized	0.05
IndivQLearningTabularSweepMillionSteps/71_7_1	decentralized	True	-10	True	GridWorld	ISR	FullObsDiscrete	Individual_Q	1.0	0.05	1000000	1	True	IndivQLearningTabularSweepMillionSteps/71_7_1_decentralized	decentralized	0.05
IndivQLearningTabularSweepMillionSteps/71_7_1	decentralized	True	-10	True	GridWorld	ISR	FullObsDiscrete	Individual_Q	1.0	0.05	1000000	1	True	IndivQLearningTabularSweepMillionSteps/71_7_1_none	none	0.05
IndivQLearningTabularSweepMillionSteps/72_7_2	decentralized	True	-10	True	GridWorld	ISR	FullObsDiscrete	Individual_Q	1.0	0.05	1000000	2	True	IndivQLearningTabularSweepMillionSteps/72_7_2_centralized	centralized	0.05
IndivQLearningTabularSweepMillionSteps/72_7_2	decentralized	True	-10	True	GridWorld	ISR	FullObsDiscrete	Individual_Q	1.0	0.05	1000000	2	True	IndivQLearningTabularSweepMillionSteps/72_7_2_decentralized	decentralized	0.05
IndivQLearningTabularSweepMillionSteps/72_7_2	decentralized	True	-10	True	GridWorld	ISR	FullObsDiscrete	Individual_Q	1.0	0.05	1000000	2	True	IndivQLearningTabularSweepMillionSteps/72_7_2_none	none	0.05
IndivQLearningTabularSweepMillionSteps/73_7_3	decentralized	True	-10	True	GridWorld	ISR	FullObsDiscrete	Individual_Q	1.0	0.05	1000000	3	True	IndivQLearningTabularSweepMillionSteps/73_7_3_centralized	centralized	0.05
IndivQLearningTabularSweepMillionSteps/73_7_3	decentralized	True	-10	True	GridWorld	ISR	FullObsDiscrete	Individual_Q	1.0	0.05	1000000	3	True	IndivQLearningTabularSweepMillionSteps/73_7_3_decentralized	decentralized	0.05
IndivQLearningTabularSweepMillionSteps/73_7_3	decentralized	True	-10	True	GridWorld	ISR	FullObsDiscrete	Individual_Q	1.0	0.05	1000000	3	True	IndivQLearningTabularSweepMillionSteps/73_7_3_none	none	0.05
IndivQLearningTabularSweepMillionSteps/74_7_4	decentralized	True	-10	True	GridWorld	ISR	FullObsDiscrete	Individual_Q	1.0	0.05	1000000	4	True	IndivQLearningTabularSweepMillionSteps/74_7_4_centralized	centralized	0.05
IndivQLearningTabularSweepMillionSteps/74_7_4	decentralized	True	-10	True	GridWorld	ISR	FullObsDiscrete	Individual_Q	1.0	0.05	1000000	4	True	IndivQLearningTabularSweepMillionSteps/74_7_4_decentralized	decentralized	0.05
IndivQLearningTabularSweepMillionSteps/74_7_4	decentralized	True	-10	True	GridWorld	ISR	FullObsDiscrete	Individual_Q	1.0	0.05	1000000	4	True	IndivQLearningTabularSweepMillionSteps/74_7_4_none	none	0.05
IndivQLearningTabularSweepMillionSteps/75_7_5	decentralized	True	-10	True	GridWorld	ISR	FullObsDiscrete	Individual_Q	1.0	0.05	1000000	5	True	IndivQLearningTabularSweepMillionSteps/75_7_5_centralized	centralized	0.05
IndivQLearningTabularSweepMillionSteps/75_7_5	decentralized	True	-10	True	GridWorld	ISR	FullObsDiscrete	Individual_Q	1.0	0.05	1000000	5	True	IndivQLearningTabularSweepMillionSteps/75_7_5_decentralized	decentralized	0.05
IndivQLearningTabularSweepMillionSteps/75_7_5	decentralized	True	-10	True	GridWorld	ISR	FullObsDiscrete	Individual_Q	1.0	0.05	1000000	5	True	IndivQLearningTabularSweepMillionSteps/75_7_5_none	none	0.05
IndivQLearningTabularSweepMillionSteps/76_7_6	decentralized	True	-10	True	GridWorld	ISR	FullObsDiscrete	Individual_Q	1.0	0.05	1000000	6	True	IndivQLearningTabularSweepMillionSteps/76_7_6_centralized	centralized	0.05
IndivQLearningTabularSweepMillionSteps/76_7_6	decentralized	True	-10	True	GridWorld	ISR	FullObsDiscrete	Individual_Q	1.0	0.05	1000000	6	True	IndivQLearningTabularSweepMillionSteps/76_7_6_decentralized	decentralized	0.05
IndivQLearningTabularSweepMillionSteps/76_7_6	decentralized	True	-10	True	GridWorld	ISR	FullObsDiscrete	Individual_Q	1.0	0.05	1000000	6	True	IndivQLearningTabularSweepMillionSteps/76_7_6_none	none	0.05
IndivQLearningTabularSweepMillionSteps/77_7_7	decentralized	True	-10	True	GridWorld	ISR	FullObsDiscrete	Individual_Q	1.0	0.05	1000000	7	True	IndivQLearningTabularSweepMillionSteps/77_7_7_centralized	centralized	0.05
IndivQLearningTabularSweepMillionSteps/77_7_7	decentralized	True	-10	True	GridWorld	ISR	FullObsDiscrete	Individual_Q	1.0	0.05	1000000	7	True	IndivQLearningTabularSweepMillionSteps/77_7_7_decentralized	decentralized	0.05
IndivQLearningTabularSweepMillionSteps/77_7_7	decentralized	True	-10	True	GridWorld	ISR	FullObsDiscrete	Individual_Q	1.0	0.05	1000000	7	True	IndivQLearningTabularSweepMillionSteps/77_7_7_none	none	0.05
IndivQLearningTabularSweepMillionSteps/78_7_8	decentralized	True	-10	True	GridWorld	ISR	FullObsDiscrete	Individual_Q	1.0	0.05	1000000	8	True	IndivQLearningTabularSweepMillionSteps/78_7_8_centralized	centralized	0.05
IndivQLearningTabularSweepMillionSteps/78_7_8	decentralized	True	-10	True	GridWorld	ISR	FullObsDiscrete	Individual_Q	1.0	0.05	1000000	8	True	IndivQLearningTabularSweepMillionSteps/78_7_8_decentralized	decentralized	0.05
IndivQLearningTabularSweepMillionSteps/78_7_8	decentralized	True	-10	True	GridWorld	ISR	FullObsDiscrete	Individual_Q	1.0	0.05	1000000	8	True	IndivQLearningTabularSweepMillionSteps/78_7_8_none	none	0.05
IndivQLearningTabularSweepMillionSteps/79_7_9	decentralized	True	-10	True	GridWorld	ISR	FullObsDiscrete	Individual_Q	1.0	0.05	1000000	9	True	IndivQLearningTabularSweepMillionSteps/79_7_9_centralized	centralized	0.05
IndivQLearningTabularSweepMillionSteps/79_7_9	decentralized	True	-10	True	GridWorld	ISR	FullObsDiscrete	Individual_Q	1.0	0.05	1000000	9	True	IndivQLearningTabularSweepMillionSteps/79_7_9_decentralized	decentralized	0.05
IndivQLearningTabularSweepMillionSteps/79_7_9	decentralized	True	-10	True	GridWorld	ISR	FullObsDiscrete	Individual_Q	1.0	0.05	1000000	9	True	IndivQLearningTabularSweepMillionSteps/79_7_9_none	none	0.05
IndivQLearningTabularSweepMillionSteps/80_8_0	none	True	-10	True	GridWorld	ISR	FullObsDiscrete	Individual_Q	1.0	0.05	1000000	0	True	IndivQLearningTabularSweepMillionSteps/80_8_0_centralized	centralized	0.05
IndivQLearningTabularSweepMillionSteps/80_8_0	none	True	-10	True	GridWorld	ISR	FullObsDiscrete	Individual_Q	1.0	0.05	1000000	0	True	IndivQLearningTabularSweepMillionSteps/80_8_0_decentralized	decentralized	0.05
IndivQLearningTabularSweepMillionSteps/80_8_0	none	True	-10	True	GridWorld	ISR	FullObsDiscrete	Individual_Q	1.0	0.05	1000000	0	True	IndivQLearningTabularSweepMillionSteps/80_8_0_none	none	0.05
IndivQLearningTabularSweepMillionSteps/81_8_1	none	True	-10	True	GridWorld	ISR	FullObsDiscrete	Individual_Q	1.0	0.05	1000000	1	True	IndivQLearningTabularSweepMillionSteps/81_8_1_centralized	centralized	0.05
IndivQLearningTabularSweepMillionSteps/81_8_1	none	True	-10	True	GridWorld	ISR	FullObsDiscrete	Individual_Q	1.0	0.05	1000000	1	True	IndivQLearningTabularSweepMillionSteps/81_8_1_decentralized	decentralized	0.05
IndivQLearningTabularSweepMillionSteps/81_8_1	none	True	-10	True	GridWorld	ISR	FullObsDiscrete	Individual_Q	1.0	0.05	1000000	1	True	IndivQLearningTabularSweepMillionSteps/81_8_1_none	none	0.05
IndivQLearningTabularSweepMillionSteps/82_8_2	none	True	-10	True	GridWorld	ISR	FullObsDiscrete	Individual_Q	1.0	0.05	1000000	2	True	IndivQLearningTabularSweepMillionSteps/82_8_2_centralized	centralized	0.05
IndivQLearningTabularSweepMillionSteps/82_8_2	none	True	-10	True	GridWorld	ISR	FullObsDiscrete	Individual_Q	1.0	0.05	1000000	2	True	IndivQLearningTabularSweepMillionSteps/82_8_2_decentralized	decentralized	0.05
IndivQLearningTabularSweepMillionSteps/82_8_2	none	True	-10	True	GridWorld	ISR	FullObsDiscrete	Individual_Q	1.0	0.05	1000000	2	True	IndivQLearningTabularSweepMillionSteps/82_8_2_none	none	0.05
IndivQLearningTabularSweepMillionSteps/83_8_3	none	True	-10	True	GridWorld	ISR	FullObsDiscrete	Individual_Q	1.0	0.05	1000000	3	True	IndivQLearningTabularSweepMillionSteps/83_8_3_centralized	centralized	0.05
IndivQLearningTabularSweepMillionSteps/83_8_3	none	True	-10	True	GridWorld	ISR	FullObsDiscrete	Individual_Q	1.0	0.05	1000000	3	True	IndivQLearningTabularSweepMillionSteps/83_8_3_decentralized	decentralized	0.05
IndivQLearningTabularSweepMillionSteps/83_8_3	none	True	-10	True	GridWorld	ISR	FullObsDiscrete	Individual_Q	1.0	0.05	1000000	3	True	IndivQLearningTabularSweepMillionSteps/83_8_3_none	none	0.05
IndivQLearningTabularSweepMillionSteps/84_8_4	none	True	-10	True	GridWorld	ISR	FullObsDiscrete	Individual_Q	1.0	0.05	1000000	4	True	IndivQLearningTabularSweepMillionSteps/84_8_4_centralized	centralized	0.05
IndivQLearningTabularSweepMillionSteps/84_8_4	none	True	-10	True	GridWorld	ISR	FullObsDiscrete	Individual_Q	1.0	0.05	1000000	4	True	IndivQLearningTabularSweepMillionSteps/84_8_4_decentralized	decentralized	0.05
IndivQLearningTabularSweepMillionSteps/84_8_4	none	True	-10	True	GridWorld	ISR	FullObsDiscrete	Individual_Q	1.0	0.05	1000000	4	True	IndivQLearningTabularSweepMillionSteps/84_8_4_none	none	0.05
IndivQLearningTabularSweepMillionSteps/85_8_5	none	True	-10	True	GridWorld	ISR	FullObsDiscrete	Individual_Q	1.0	0.05	1000000	5	True	IndivQLearningTabularSweepMillionSteps/85_8_5_centralized	centralized	0.05
IndivQLearningTabularSweepMillionSteps/85_8_5	none	True	-10	True	GridWorld	ISR	FullObsDiscrete	Individual_Q	1.0	0.05	1000000	5	True	IndivQLearningTabularSweepMillionSteps/85_8_5_decentralized	decentralized	0.05
IndivQLearningTabularSweepMillionSteps/85_8_5	none	True	-10	True	GridWorld	ISR	FullObsDiscrete	Individual_Q	1.0	0.05	1000000	5	True	IndivQLearningTabularSweepMillionSteps/85_8_5_none	none	0.05
IndivQLearningTabularSweepMillionSteps/86_8_6	none	True	-10	True	GridWorld	ISR	FullObsDiscrete	Individual_Q	1.0	0.05	1000000	6	True	IndivQLearningTabularSweepMillionSteps/86_8_6_centralized	centralized	0.05
IndivQLearningTabularSweepMillionSteps/86_8_6	none	True	-10	True	GridWorld	ISR	FullObsDiscrete	Individual_Q	1.0	0.05	1000000	6	True	IndivQLearningTabularSweepMillionSteps/86_8_6_decentralized	decentralized	0.05
IndivQLearningTabularSweepMillionSteps/86_8_6	none	True	-10	True	GridWorld	ISR	FullObsDiscrete	Individual_Q	1.0	0.05	1000000	6	True	IndivQLearningTabularSweepMillionSteps/86_8_6_none	none	0.05
IndivQLearningTabularSweepMillionSteps/87_8_7	none	True	-10	True	GridWorld	ISR	FullObsDiscrete	Individual_Q	1.0	0.05	1000000	7	True	IndivQLearningTabularSweepMillionSteps/87_8_7_centralized	centralized	0.05
IndivQLearningTabularSweepMillionSteps/87_8_7	none	True	-10	True	GridWorld	ISR	FullObsDiscrete	Individual_Q	1.0	0.05	1000000	7	True	IndivQLearningTabularSweepMillionSteps/87_8_7_decentralized	decentralized	0.05
IndivQLearningTabularSweepMillionSteps/87_8_7	none	True	-10	True	GridWorld	ISR	FullObsDiscrete	Individual_Q	1.0	0.05	1000000	7	True	IndivQLearningTabularSweepMillionSteps/87_8_7_none	none	0.05
IndivQLearningTabularSweepMillionSteps/88_8_8	none	True	-10	True	GridWorld	ISR	FullObsDiscrete	Individual_Q	1.0	0.05	1000000	8	True	IndivQLearningTabularSweepMillionSteps/88_8_8_centralized	centralized	0.05
IndivQLearningTabularSweepMillionSteps/88_8_8	none	True	-10	True	GridWorld	ISR	FullObsDiscrete	Individual_Q	1.0	0.05	1000000	8	True	IndivQLearningTabularSweepMillionSteps/88_8_8_decentralized	decentralized	0.05
IndivQLearningTabularSweepMillionSteps/88_8_8	none	True	-10	True	GridWorld	ISR	FullObsDiscrete	Individual_Q	1.0	0.05	1000000	8	True	IndivQLearningTabularSweepMillionSteps/88_8_8_none	none	0.05
IndivQLearningTabularSweepMillionSteps/89_8_9	none	True	-10	True	GridWorld	ISR	FullObsDiscrete	Individual_Q	1.0	0.05	1000000	9	True	IndivQLearningTabularSweepMillionSteps/89_8_9_centralized	centralized	0.05
IndivQLearningTabularSweepMillionSteps/89_8_9	none	True	-10	True	GridWorld	ISR	FullObsDiscrete	Individual_Q	1.0	0.05	1000000	9	True	IndivQLearningTabularSweepMillionSteps/89_8_9_decentralized	decentralized	0.05
IndivQLearningTabularSweepMillionSteps/89_8_9	none	True	-10	True	GridWorld	ISR	FullObsDiscrete	Individual_Q	1.0	0.05	1000000	9	True	IndivQLearningTabularSweepMillionSteps/89_8_9_none	none	0.05
IndivQLearningTabularSweepMillionSteps/90_9_0	centralized	True	-10	False	GridWorld	ISR	FullObsDiscrete	Individual_Q	1.0	0.05	1000000	0	True	IndivQLearningTabularSweepMillionSteps/90_9_0_centralized	centralized	0.05
IndivQLearningTabularSweepMillionSteps/90_9_0	centralized	True	-10	False	GridWorld	ISR	FullObsDiscrete	Individual_Q	1.0	0.05	1000000	0	True	IndivQLearningTabularSweepMillionSteps/90_9_0_decentralized	decentralized	0.05
IndivQLearningTabularSweepMillionSteps/90_9_0	centralized	True	-10	False	GridWorld	ISR	FullObsDiscrete	Individual_Q	1.0	0.05	1000000	0	True	IndivQLearningTabularSweepMillionSteps/90_9_0_none	none	0.05
IndivQLearningTabularSweepMillionSteps/91_9_1	centralized	True	-10	False	GridWorld	ISR	FullObsDiscrete	Individual_Q	1.0	0.05	1000000	1	True	IndivQLearningTabularSweepMillionSteps/91_9_1_centralized	centralized	0.05
IndivQLearningTabularSweepMillionSteps/91_9_1	centralized	True	-10	False	GridWorld	ISR	FullObsDiscrete	Individual_Q	1.0	0.05	1000000	1	True	IndivQLearningTabularSweepMillionSteps/91_9_1_decentralized	decentralized	0.05
IndivQLearningTabularSweepMillionSteps/91_9_1	centralized	True	-10	False	GridWorld	ISR	FullObsDiscrete	Individual_Q	1.0	0.05	1000000	1	True	IndivQLearningTabularSweepMillionSteps/91_9_1_none	none	0.05
IndivQLearningTabularSweepMillionSteps/92_9_2	centralized	True	-10	False	GridWorld	ISR	FullObsDiscrete	Individual_Q	1.0	0.05	1000000	2	True	IndivQLearningTabularSweepMillionSteps/92_9_2_centralized	centralized	0.05
IndivQLearningTabularSweepMillionSteps/92_9_2	centralized	True	-10	False	GridWorld	ISR	FullObsDiscrete	Individual_Q	1.0	0.05	1000000	2	True	IndivQLearningTabularSweepMillionSteps/92_9_2_decentralized	decentralized	0.05
IndivQLearningTabularSweepMillionSteps/92_9_2	centralized	True	-10	False	GridWorld	ISR	FullObsDiscrete	Individual_Q	1.0	0.05	1000000	2	True	IndivQLearningTabularSweepMillionSteps/92_9_2_none	none	0.05
IndivQLearningTabularSweepMillionSteps/93_9_3	centralized	True	-10	False	GridWorld	ISR	FullObsDiscrete	Individual_Q	1.0	0.05	1000000	3	True	IndivQLearningTabularSweepMillionSteps/93_9_3_centralized	centralized	0.05
IndivQLearningTabularSweepMillionSteps/93_9_3	centralized	True	-10	False	GridWorld	ISR	FullObsDiscrete	Individual_Q	1.0	0.05	1000000	3	True	IndivQLearningTabularSweepMillionSteps/93_9_3_decentralized	decentralized	0.05
IndivQLearningTabularSweepMillionSteps/93_9_3	centralized	True	-10	False	GridWorld	ISR	FullObsDiscrete	Individual_Q	1.0	0.05	1000000	3	True	IndivQLearningTabularSweepMillionSteps/93_9_3_none	none	0.05
IndivQLearningTabularSweepMillionSteps/94_9_4	centralized	True	-10	False	GridWorld	ISR	FullObsDiscrete	Individual_Q	1.0	0.05	1000000	4	True	IndivQLearningTabularSweepMillionSteps/94_9_4_centralized	centralized	0.05
IndivQLearningTabularSweepMillionSteps/94_9_4	centralized	True	-10	False	GridWorld	ISR	FullObsDiscrete	Individual_Q	1.0	0.05	1000000	4	True	IndivQLearningTabularSweepMillionSteps/94_9_4_decentralized	decentralized	0.05
IndivQLearningTabularSweepMillionSteps/94_9_4	centralized	True	-10	False	GridWorld	ISR	FullObsDiscrete	Individual_Q	1.0	0.05	1000000	4	True	IndivQLearningTabularSweepMillionSteps/94_9_4_none	none	0.05
IndivQLearningTabularSweepMillionSteps/95_9_5	centralized	True	-10	False	GridWorld	ISR	FullObsDiscrete	Individual_Q	1.0	0.05	1000000	5	True	IndivQLearningTabularSweepMillionSteps/95_9_5_centralized	centralized	0.05
IndivQLearningTabularSweepMillionSteps/95_9_5	centralized	True	-10	False	GridWorld	ISR	FullObsDiscrete	Individual_Q	1.0	0.05	1000000	5	True	IndivQLearningTabularSweepMillionSteps/95_9_5_decentralized	decentralized	0.05
IndivQLearningTabularSweepMillionSteps/95_9_5	centralized	True	-10	False	GridWorld	ISR	FullObsDiscrete	Individual_Q	1.0	0.05	1000000	5	True	IndivQLearningTabularSweepMillionSteps/95_9_5_none	none	0.05
IndivQLearningTabularSweepMillionSteps/96_9_6	centralized	True	-10	False	GridWorld	ISR	FullObsDiscrete	Individual_Q	1.0	0.05	1000000	6	True	IndivQLearningTabularSweepMillionSteps/96_9_6_centralized	centralized	0.05
IndivQLearningTabularSweepMillionSteps/96_9_6	centralized	True	-10	False	GridWorld	ISR	FullObsDiscrete	Individual_Q	1.0	0.05	1000000	6	True	IndivQLearningTabularSweepMillionSteps/96_9_6_decentralized	decentralized	0.05
IndivQLearningTabularSweepMillionSteps/96_9_6	centralized	True	-10	False	GridWorld	ISR	FullObsDiscrete	Individual_Q	1.0	0.05	1000000	6	True	IndivQLearningTabularSweepMillionSteps/96_9_6_none	none	0.05
IndivQLearningTabularSweepMillionSteps/97_9_7	centralized	True	-10	False	GridWorld	ISR	FullObsDiscrete	Individual_Q	1.0	0.05	1000000	7	True	IndivQLearningTabularSweepMillionSteps/97_9_7_centralized	centralized	0.05
IndivQLearningTabularSweepMillionSteps/97_9_7	centralized	True	-10	False	GridWorld	ISR	FullObsDiscrete	Individual_Q	1.0	0.05	1000000	7	True	IndivQLearningTabularSweepMillionSteps/97_9_7_decentralized	decentralized	0.05
IndivQLearningTabularSweepMillionSteps/97_9_7	centralized	True	-10	False	GridWorld	ISR	FullObsDiscrete	Individual_Q	1.0	0.05	1000000	7	True	IndivQLearningTabularSweepMillionSteps/97_9_7_none	none	0.05
IndivQLearningTabularSweepMillionSteps/98_9_8	centralized	True	-10	False	GridWorld	ISR	FullObsDiscrete	Individual_Q	1.0	0.05	1000000	8	True	IndivQLearningTabularSweepMillionSteps/98_9_8_centralized	centralized	0.05
IndivQLearningTabularSweepMillionSteps/98_9_8	centralized	True	-10	False	GridWorld	ISR	FullObsDiscrete	Individual_Q	1.0	0.05	1000000	8	True	IndivQLearningTabularSweepMillionSteps/98_9_8_decentralized	decentralized	0.05
IndivQLearningTabularSweepMillionSteps/98_9_8	centralized	True	-10	False	GridWorld	ISR	FullObsDiscrete	Individual_Q	1.0	0.05	1000000	8	True	IndivQLearningTabularSweepMillionSteps/98_9_8_none	none	0.05
IndivQLearningTabularSweepMillionSteps/99_9_9	centralized	True	-10	False	GridWorld	ISR	FullObsDiscrete	Individual_Q	1.0	0.05	1000000	9	True	IndivQLearningTabularSweepMillionSteps/99_9_9_centralized	centralized	0.05
IndivQLearningTabularSweepMillionSteps/99_9_9	centralized	True	-10	False	GridWorld	ISR	FullObsDiscrete	Individual_Q	1.0	0.05	1000000	9	True	IndivQLearningTabularSweepMillionSteps/99_9_9_decentralized	decentralized	0.05
IndivQLearningTabularSweepMillionSteps/99_9_9	centralized	True	-10	False	GridWorld	ISR	FullObsDiscrete	Individual_Q	1.0	0.05	1000000	9	True	IndivQLearningTabularSweepMillionSteps/99_9_9_none	none	0.05
IndivQLearningTabularSweepMillionSteps/100_10_0	decentralized	True	-10	False	GridWorld	ISR	FullObsDiscrete	Individual_Q	1.0	0.05	1000000	0	True	IndivQLearningTabularSweepMillionSteps/100_10_0_centralized	centralized	0.05
IndivQLearningTabularSweepMillionSteps/100_10_0	decentralized	True	-10	False	GridWorld	ISR	FullObsDiscrete	Individual_Q	1.0	0.05	1000000	0	True	IndivQLearningTabularSweepMillionSteps/100_10_0_decentralized	decentralized	0.05
IndivQLearningTabularSweepMillionSteps/100_10_0	decentralized	True	-10	False	GridWorld	ISR	FullObsDiscrete	Individual_Q	1.0	0.05	1000000	0	True	IndivQLearningTabularSweepMillionSteps/100_10_0_none	none	0.05
IndivQLearningTabularSweepMillionSteps/101_10_1	decentralized	True	-10	False	GridWorld	ISR	FullObsDiscrete	Individual_Q	1.0	0.05	1000000	1	True	IndivQLearningTabularSweepMillionSteps/101_10_1_centralized	centralized	0.05
IndivQLearningTabularSweepMillionSteps/101_10_1	decentralized	True	-10	False	GridWorld	ISR	FullObsDiscrete	Individual_Q	1.0	0.05	1000000	1	True	IndivQLearningTabularSweepMillionSteps/101_10_1_decentralized	decentralized	0.05
IndivQLearningTabularSweepMillionSteps/101_10_1	decentralized	True	-10	False	GridWorld	ISR	FullObsDiscrete	Individual_Q	1.0	0.05	1000000	1	True	IndivQLearningTabularSweepMillionSteps/101_10_1_none	none	0.05
IndivQLearningTabularSweepMillionSteps/102_10_2	decentralized	True	-10	False	GridWorld	ISR	FullObsDiscrete	Individual_Q	1.0	0.05	1000000	2	True	IndivQLearningTabularSweepMillionSteps/102_10_2_centralized	centralized	0.05
IndivQLearningTabularSweepMillionSteps/102_10_2	decentralized	True	-10	False	GridWorld	ISR	FullObsDiscrete	Individual_Q	1.0	0.05	1000000	2	True	IndivQLearningTabularSweepMillionSteps/102_10_2_decentralized	decentralized	0.05
IndivQLearningTabularSweepMillionSteps/102_10_2	decentralized	True	-10	False	GridWorld	ISR	FullObsDiscrete	Individual_Q	1.0	0.05	1000000	2	True	IndivQLearningTabularSweepMillionSteps/102_10_2_none	none	0.05
IndivQLearningTabularSweepMillionSteps/103_10_3	decentralized	True	-10	False	GridWorld	ISR	FullObsDiscrete	Individual_Q	1.0	0.05	1000000	3	True	IndivQLearningTabularSweepMillionSteps/103_10_3_centralized	centralized	0.05
IndivQLearningTabularSweepMillionSteps/103_10_3	decentralized	True	-10	False	GridWorld	ISR	FullObsDiscrete	Individual_Q	1.0	0.05	1000000	3	True	IndivQLearningTabularSweepMillionSteps/103_10_3_decentralized	decentralized	0.05
IndivQLearningTabularSweepMillionSteps/103_10_3	decentralized	True	-10	False	GridWorld	ISR	FullObsDiscrete	Individual_Q	1.0	0.05	1000000	3	True	IndivQLearningTabularSweepMillionSteps/103_10_3_none	none	0.05
IndivQLearningTabularSweepMillionSteps/104_10_4	decentralized	True	-10	False	GridWorld	ISR	FullObsDiscrete	Individual_Q	1.0	0.05	1000000	4	True	IndivQLearningTabularSweepMillionSteps/104_10_4_centralized	centralized	0.05
IndivQLearningTabularSweepMillionSteps/104_10_4	decentralized	True	-10	False	GridWorld	ISR	FullObsDiscrete	Individual_Q	1.0	0.05	1000000	4	True	IndivQLearningTabularSweepMillionSteps/104_10_4_decentralized	decentralized	0.05
IndivQLearningTabularSweepMillionSteps/104_10_4	decentralized	True	-10	False	GridWorld	ISR	FullObsDiscrete	Individual_Q	1.0	0.05	1000000	4	True	IndivQLearningTabularSweepMillionSteps/104_10_4_none	none	0.05
IndivQLearningTabularSweepMillionSteps/105_10_5	decentralized	True	-10	False	GridWorld	ISR	FullObsDiscrete	Individual_Q	1.0	0.05	1000000	5	True	IndivQLearningTabularSweepMillionSteps/105_10_5_centralized	centralized	0.05
IndivQLearningTabularSweepMillionSteps/105_10_5	decentralized	True	-10	False	GridWorld	ISR	FullObsDiscrete	Individual_Q	1.0	0.05	1000000	5	True	IndivQLearningTabularSweepMillionSteps/105_10_5_decentralized	decentralized	0.05
IndivQLearningTabularSweepMillionSteps/105_10_5	decentralized	True	-10	False	GridWorld	ISR	FullObsDiscrete	Individual_Q	1.0	0.05	1000000	5	True	IndivQLearningTabularSweepMillionSteps/105_10_5_none	none	0.05
IndivQLearningTabularSweepMillionSteps/106_10_6	decentralized	True	-10	False	GridWorld	ISR	FullObsDiscrete	Individual_Q	1.0	0.05	1000000	6	True	IndivQLearningTabularSweepMillionSteps/106_10_6_centralized	centralized	0.05
IndivQLearningTabularSweepMillionSteps/106_10_6	decentralized	True	-10	False	GridWorld	ISR	FullObsDiscrete	Individual_Q	1.0	0.05	1000000	6	True	IndivQLearningTabularSweepMillionSteps/106_10_6_decentralized	decentralized	0.05
IndivQLearningTabularSweepMillionSteps/106_10_6	decentralized	True	-10	False	GridWorld	ISR	FullObsDiscrete	Individual_Q	1.0	0.05	1000000	6	True	IndivQLearningTabularSweepMillionSteps/106_10_6_none	none	0.05
IndivQLearningTabularSweepMillionSteps/107_10_7	decentralized	True	-10	False	GridWorld	ISR	FullObsDiscrete	Individual_Q	1.0	0.05	1000000	7	True	IndivQLearningTabularSweepMillionSteps/107_10_7_centralized	centralized	0.05
IndivQLearningTabularSweepMillionSteps/107_10_7	decentralized	True	-10	False	GridWorld	ISR	FullObsDiscrete	Individual_Q	1.0	0.05	1000000	7	True	IndivQLearningTabularSweepMillionSteps/107_10_7_decentralized	decentralized	0.05
IndivQLearningTabularSweepMillionSteps/107_10_7	decentralized	True	-10	False	GridWorld	ISR	FullObsDiscrete	Individual_Q	1.0	0.05	1000000	7	True	IndivQLearningTabularSweepMillionSteps/107_10_7_none	none	0.05
IndivQLearningTabularSweepMillionSteps/108_10_8	decentralized	True	-10	False	GridWorld	ISR	FullObsDiscrete	Individual_Q	1.0	0.05	1000000	8	True	IndivQLearningTabularSweepMillionSteps/108_10_8_centralized	centralized	0.05
IndivQLearningTabularSweepMillionSteps/108_10_8	decentralized	True	-10	False	GridWorld	ISR	FullObsDiscrete	Individual_Q	1.0	0.05	1000000	8	True	IndivQLearningTabularSweepMillionSteps/108_10_8_decentralized	decentralized	0.05
IndivQLearningTabularSweepMillionSteps/108_10_8	decentralized	True	-10	False	GridWorld	ISR	FullObsDiscrete	Individual_Q	1.0	0.05	1000000	8	True	IndivQLearningTabularSweepMillionSteps/108_10_8_none	none	0.05
IndivQLearningTabularSweepMillionSteps/109_10_9	decentralized	True	-10	False	GridWorld	ISR	FullObsDiscrete	Individual_Q	1.0	0.05	1000000	9	True	IndivQLearningTabularSweepMillionSteps/109_10_9_centralized	centralized	0.05
IndivQLearningTabularSweepMillionSteps/109_10_9	decentralized	True	-10	False	GridWorld	ISR	FullObsDiscrete	Individual_Q	1.0	0.05	1000000	9	True	IndivQLearningTabularSweepMillionSteps/109_10_9_decentralized	decentralized	0.05
IndivQLearningTabularSweepMillionSteps/109_10_9	decentralized	True	-10	False	GridWorld	ISR	FullObsDiscrete	Individual_Q	1.0	0.05	1000000	9	True	IndivQLearningTabularSweepMillionSteps/109_10_9_none	none	0.05
IndivQLearningTabularSweepMillionSteps/110_11_0	none	True	-10	False	GridWorld	ISR	FullObsDiscrete	Individual_Q	1.0	0.05	1000000	0	True	IndivQLearningTabularSweepMillionSteps/110_11_0_centralized	centralized	0.05
IndivQLearningTabularSweepMillionSteps/110_11_0	none	True	-10	False	GridWorld	ISR	FullObsDiscrete	Individual_Q	1.0	0.05	1000000	0	True	IndivQLearningTabularSweepMillionSteps/110_11_0_decentralized	decentralized	0.05
IndivQLearningTabularSweepMillionSteps/110_11_0	none	True	-10	False	GridWorld	ISR	FullObsDiscrete	Individual_Q	1.0	0.05	1000000	0	True	IndivQLearningTabularSweepMillionSteps/110_11_0_none	none	0.05
IndivQLearningTabularSweepMillionSteps/111_11_1	none	True	-10	False	GridWorld	ISR	FullObsDiscrete	Individual_Q	1.0	0.05	1000000	1	True	IndivQLearningTabularSweepMillionSteps/111_11_1_centralized	centralized	0.05
IndivQLearningTabularSweepMillionSteps/111_11_1	none	True	-10	False	GridWorld	ISR	FullObsDiscrete	Individual_Q	1.0	0.05	1000000	1	True	IndivQLearningTabularSweepMillionSteps/111_11_1_decentralized	decentralized	0.05
IndivQLearningTabularSweepMillionSteps/111_11_1	none	True	-10	False	GridWorld	ISR	FullObsDiscrete	Individual_Q	1.0	0.05	1000000	1	True	IndivQLearningTabularSweepMillionSteps/111_11_1_none	none	0.05
IndivQLearningTabularSweepMillionSteps/112_11_2	none	True	-10	False	GridWorld	ISR	FullObsDiscrete	Individual_Q	1.0	0.05	1000000	2	True	IndivQLearningTabularSweepMillionSteps/112_11_2_centralized	centralized	0.05
IndivQLearningTabularSweepMillionSteps/112_11_2	none	True	-10	False	GridWorld	ISR	FullObsDiscrete	Individual_Q	1.0	0.05	1000000	2	True	IndivQLearningTabularSweepMillionSteps/112_11_2_decentralized	decentralized	0.05
IndivQLearningTabularSweepMillionSteps/112_11_2	none	True	-10	False	GridWorld	ISR	FullObsDiscrete	Individual_Q	1.0	0.05	1000000	2	True	IndivQLearningTabularSweepMillionSteps/112_11_2_none	none	0.05
IndivQLearningTabularSweepMillionSteps/113_11_3	none	True	-10	False	GridWorld	ISR	FullObsDiscrete	Individual_Q	1.0	0.05	1000000	3	True	IndivQLearningTabularSweepMillionSteps/113_11_3_centralized	centralized	0.05
IndivQLearningTabularSweepMillionSteps/113_11_3	none	True	-10	False	GridWorld	ISR	FullObsDiscrete	Individual_Q	1.0	0.05	1000000	3	True	IndivQLearningTabularSweepMillionSteps/113_11_3_decentralized	decentralized	0.05
IndivQLearningTabularSweepMillionSteps/113_11_3	none	True	-10	False	GridWorld	ISR	FullObsDiscrete	Individual_Q	1.0	0.05	1000000	3	True	IndivQLearningTabularSweepMillionSteps/113_11_3_none	none	0.05
IndivQLearningTabularSweepMillionSteps/114_11_4	none	True	-10	False	GridWorld	ISR	FullObsDiscrete	Individual_Q	1.0	0.05	1000000	4	True	IndivQLearningTabularSweepMillionSteps/114_11_4_centralized	centralized	0.05
IndivQLearningTabularSweepMillionSteps/114_11_4	none	True	-10	False	GridWorld	ISR	FullObsDiscrete	Individual_Q	1.0	0.05	1000000	4	True	IndivQLearningTabularSweepMillionSteps/114_11_4_decentralized	decentralized	0.05
IndivQLearningTabularSweepMillionSteps/114_11_4	none	True	-10	False	GridWorld	ISR	FullObsDiscrete	Individual_Q	1.0	0.05	1000000	4	True	IndivQLearningTabularSweepMillionSteps/114_11_4_none	none	0.05
IndivQLearningTabularSweepMillionSteps/115_11_5	none	True	-10	False	GridWorld	ISR	FullObsDiscrete	Individual_Q	1.0	0.05	1000000	5	True	IndivQLearningTabularSweepMillionSteps/115_11_5_centralized	centralized	0.05
IndivQLearningTabularSweepMillionSteps/115_11_5	none	True	-10	False	GridWorld	ISR	FullObsDiscrete	Individual_Q	1.0	0.05	1000000	5	True	IndivQLearningTabularSweepMillionSteps/115_11_5_decentralized	decentralized	0.05
IndivQLearningTabularSweepMillionSteps/115_11_5	none	True	-10	False	GridWorld	ISR	FullObsDiscrete	Individual_Q	1.0	0.05	1000000	5	True	IndivQLearningTabularSweepMillionSteps/115_11_5_none	none	0.05
IndivQLearningTabularSweepMillionSteps/116_11_6	none	True	-10	False	GridWorld	ISR	FullObsDiscrete	Individual_Q	1.0	0.05	1000000	6	True	IndivQLearningTabularSweepMillionSteps/116_11_6_centralized	centralized	0.05
IndivQLearningTabularSweepMillionSteps/116_11_6	none	True	-10	False	GridWorld	ISR	FullObsDiscrete	Individual_Q	1.0	0.05	1000000	6	True	IndivQLearningTabularSweepMillionSteps/116_11_6_decentralized	decentralized	0.05
IndivQLearningTabularSweepMillionSteps/116_11_6	none	True	-10	False	GridWorld	ISR	FullObsDiscrete	Individual_Q	1.0	0.05	1000000	6	True	IndivQLearningTabularSweepMillionSteps/116_11_6_none	none	0.05
IndivQLearningTabularSweepMillionSteps/117_11_7	none	True	-10	False	GridWorld	ISR	FullObsDiscrete	Individual_Q	1.0	0.05	1000000	7	True	IndivQLearningTabularSweepMillionSteps/117_11_7_centralized	centralized	0.05
IndivQLearningTabularSweepMillionSteps/117_11_7	none	True	-10	False	GridWorld	ISR	FullObsDiscrete	Individual_Q	1.0	0.05	1000000	7	True	IndivQLearningTabularSweepMillionSteps/117_11_7_decentralized	decentralized	0.05
IndivQLearningTabularSweepMillionSteps/117_11_7	none	True	-10	False	GridWorld	ISR	FullObsDiscrete	Individual_Q	1.0	0.05	1000000	7	True	IndivQLearningTabularSweepMillionSteps/117_11_7_none	none	0.05
IndivQLearningTabularSweepMillionSteps/118_11_8	none	True	-10	False	GridWorld	ISR	FullObsDiscrete	Individual_Q	1.0	0.05	1000000	8	True	IndivQLearningTabularSweepMillionSteps/118_11_8_centralized	centralized	0.05
IndivQLearningTabularSweepMillionSteps/118_11_8	none	True	-10	False	GridWorld	ISR	FullObsDiscrete	Individual_Q	1.0	0.05	1000000	8	True	IndivQLearningTabularSweepMillionSteps/118_11_8_decentralized	decentralized	0.05
IndivQLearningTabularSweepMillionSteps/118_11_8	none	True	-10	False	GridWorld	ISR	FullObsDiscrete	Individual_Q	1.0	0.05	1000000	8	True	IndivQLearningTabularSweepMillionSteps/118_11_8_none	none	0.05
IndivQLearningTabularSweepMillionSteps/119_11_9	none	True	-10	False	GridWorld	ISR	FullObsDiscrete	Individual_Q	1.0	0.05	1000000	9	True	IndivQLearningTabularSweepMillionSteps/119_11_9_centralized	centralized	0.05
IndivQLearningTabularSweepMillionSteps/119_11_9	none	True	-10	False	GridWorld	ISR	FullObsDiscrete	Individual_Q	1.0	0.05	1000000	9	True	IndivQLearningTabularSweepMillionSteps/119_11_9_decentralized	decentralized	0.05
IndivQLearningTabularSweepMillionSteps/119_11_9	none	True	-10	False	GridWorld	ISR	FullObsDiscrete	Individual_Q	1.0	0.05	1000000	9	True	IndivQLearningTabularSweepMillionSteps/119_11_9_none	none	0.05
IndivQLearningTabularSweepMillionSteps/120_12_0	centralized	True	-10	True	GridWorld	SUNY	FullObsDiscrete	Individual_Q	1.0	0.05	1000000	0	True	IndivQLearningTabularSweepMillionSteps/120_12_0_centralized	centralized	0.05
IndivQLearningTabularSweepMillionSteps/120_12_0	centralized	True	-10	True	GridWorld	SUNY	FullObsDiscrete	Individual_Q	1.0	0.05	1000000	0	True	IndivQLearningTabularSweepMillionSteps/120_12_0_decentralized	decentralized	0.05
IndivQLearningTabularSweepMillionSteps/120_12_0	centralized	True	-10	True	GridWorld	SUNY	FullObsDiscrete	Individual_Q	1.0	0.05	1000000	0	True	IndivQLearningTabularSweepMillionSteps/120_12_0_none	none	0.05
IndivQLearningTabularSweepMillionSteps/121_12_1	centralized	True	-10	True	GridWorld	SUNY	FullObsDiscrete	Individual_Q	1.0	0.05	1000000	1	True	IndivQLearningTabularSweepMillionSteps/121_12_1_centralized	centralized	0.05
IndivQLearningTabularSweepMillionSteps/121_12_1	centralized	True	-10	True	GridWorld	SUNY	FullObsDiscrete	Individual_Q	1.0	0.05	1000000	1	True	IndivQLearningTabularSweepMillionSteps/121_12_1_decentralized	decentralized	0.05
IndivQLearningTabularSweepMillionSteps/121_12_1	centralized	True	-10	True	GridWorld	SUNY	FullObsDiscrete	Individual_Q	1.0	0.05	1000000	1	True	IndivQLearningTabularSweepMillionSteps/121_12_1_none	none	0.05
IndivQLearningTabularSweepMillionSteps/122_12_2	centralized	True	-10	True	GridWorld	SUNY	FullObsDiscrete	Individual_Q	1.0	0.05	1000000	2	True	IndivQLearningTabularSweepMillionSteps/122_12_2_centralized	centralized	0.05
IndivQLearningTabularSweepMillionSteps/122_12_2	centralized	True	-10	True	GridWorld	SUNY	FullObsDiscrete	Individual_Q	1.0	0.05	1000000	2	True	IndivQLearningTabularSweepMillionSteps/122_12_2_decentralized	decentralized	0.05
IndivQLearningTabularSweepMillionSteps/122_12_2	centralized	True	-10	True	GridWorld	SUNY	FullObsDiscrete	Individual_Q	1.0	0.05	1000000	2	True	IndivQLearningTabularSweepMillionSteps/122_12_2_none	none	0.05
IndivQLearningTabularSweepMillionSteps/123_12_3	centralized	True	-10	True	GridWorld	SUNY	FullObsDiscrete	Individual_Q	1.0	0.05	1000000	3	True	IndivQLearningTabularSweepMillionSteps/123_12_3_centralized	centralized	0.05
IndivQLearningTabularSweepMillionSteps/123_12_3	centralized	True	-10	True	GridWorld	SUNY	FullObsDiscrete	Individual_Q	1.0	0.05	1000000	3	True	IndivQLearningTabularSweepMillionSteps/123_12_3_decentralized	decentralized	0.05
IndivQLearningTabularSweepMillionSteps/123_12_3	centralized	True	-10	True	GridWorld	SUNY	FullObsDiscrete	Individual_Q	1.0	0.05	1000000	3	True	IndivQLearningTabularSweepMillionSteps/123_12_3_none	none	0.05
IndivQLearningTabularSweepMillionSteps/124_12_4	centralized	True	-10	True	GridWorld	SUNY	FullObsDiscrete	Individual_Q	1.0	0.05	1000000	4	True	IndivQLearningTabularSweepMillionSteps/124_12_4_centralized	centralized	0.05
IndivQLearningTabularSweepMillionSteps/124_12_4	centralized	True	-10	True	GridWorld	SUNY	FullObsDiscrete	Individual_Q	1.0	0.05	1000000	4	True	IndivQLearningTabularSweepMillionSteps/124_12_4_decentralized	decentralized	0.05
IndivQLearningTabularSweepMillionSteps/124_12_4	centralized	True	-10	True	GridWorld	SUNY	FullObsDiscrete	Individual_Q	1.0	0.05	1000000	4	True	IndivQLearningTabularSweepMillionSteps/124_12_4_none	none	0.05
IndivQLearningTabularSweepMillionSteps/125_12_5	centralized	True	-10	True	GridWorld	SUNY	FullObsDiscrete	Individual_Q	1.0	0.05	1000000	5	True	IndivQLearningTabularSweepMillionSteps/125_12_5_centralized	centralized	0.05
IndivQLearningTabularSweepMillionSteps/125_12_5	centralized	True	-10	True	GridWorld	SUNY	FullObsDiscrete	Individual_Q	1.0	0.05	1000000	5	True	IndivQLearningTabularSweepMillionSteps/125_12_5_decentralized	decentralized	0.05
IndivQLearningTabularSweepMillionSteps/125_12_5	centralized	True	-10	True	GridWorld	SUNY	FullObsDiscrete	Individual_Q	1.0	0.05	1000000	5	True	IndivQLearningTabularSweepMillionSteps/125_12_5_none	none	0.05
IndivQLearningTabularSweepMillionSteps/126_12_6	centralized	True	-10	True	GridWorld	SUNY	FullObsDiscrete	Individual_Q	1.0	0.05	1000000	6	True	IndivQLearningTabularSweepMillionSteps/126_12_6_centralized	centralized	0.05
IndivQLearningTabularSweepMillionSteps/126_12_6	centralized	True	-10	True	GridWorld	SUNY	FullObsDiscrete	Individual_Q	1.0	0.05	1000000	6	True	IndivQLearningTabularSweepMillionSteps/126_12_6_decentralized	decentralized	0.05
IndivQLearningTabularSweepMillionSteps/126_12_6	centralized	True	-10	True	GridWorld	SUNY	FullObsDiscrete	Individual_Q	1.0	0.05	1000000	6	True	IndivQLearningTabularSweepMillionSteps/126_12_6_none	none	0.05
IndivQLearningTabularSweepMillionSteps/127_12_7	centralized	True	-10	True	GridWorld	SUNY	FullObsDiscrete	Individual_Q	1.0	0.05	1000000	7	True	IndivQLearningTabularSweepMillionSteps/127_12_7_centralized	centralized	0.05
IndivQLearningTabularSweepMillionSteps/127_12_7	centralized	True	-10	True	GridWorld	SUNY	FullObsDiscrete	Individual_Q	1.0	0.05	1000000	7	True	IndivQLearningTabularSweepMillionSteps/127_12_7_decentralized	decentralized	0.05
IndivQLearningTabularSweepMillionSteps/127_12_7	centralized	True	-10	True	GridWorld	SUNY	FullObsDiscrete	Individual_Q	1.0	0.05	1000000	7	True	IndivQLearningTabularSweepMillionSteps/127_12_7_none	none	0.05
IndivQLearningTabularSweepMillionSteps/128_12_8	centralized	True	-10	True	GridWorld	SUNY	FullObsDiscrete	Individual_Q	1.0	0.05	1000000	8	True	IndivQLearningTabularSweepMillionSteps/128_12_8_centralized	centralized	0.05
IndivQLearningTabularSweepMillionSteps/128_12_8	centralized	True	-10	True	GridWorld	SUNY	FullObsDiscrete	Individual_Q	1.0	0.05	1000000	8	True	IndivQLearningTabularSweepMillionSteps/128_12_8_decentralized	decentralized	0.05
IndivQLearningTabularSweepMillionSteps/128_12_8	centralized	True	-10	True	GridWorld	SUNY	FullObsDiscrete	Individual_Q	1.0	0.05	1000000	8	True	IndivQLearningTabularSweepMillionSteps/128_12_8_none	none	0.05
IndivQLearningTabularSweepMillionSteps/129_12_9	centralized	True	-10	True	GridWorld	SUNY	FullObsDiscrete	Individual_Q	1.0	0.05	1000000	9	True	IndivQLearningTabularSweepMillionSteps/129_12_9_centralized	centralized	0.05
IndivQLearningTabularSweepMillionSteps/129_12_9	centralized	True	-10	True	GridWorld	SUNY	FullObsDiscrete	Individual_Q	1.0	0.05	1000000	9	True	IndivQLearningTabularSweepMillionSteps/129_12_9_decentralized	decentralized	0.05
IndivQLearningTabularSweepMillionSteps/129_12_9	centralized	True	-10	True	GridWorld	SUNY	FullObsDiscrete	Individual_Q	1.0	0.05	1000000	9	True	IndivQLearningTabularSweepMillionSteps/129_12_9_none	none	0.05
IndivQLearningTabularSweepMillionSteps/130_13_0	decentralized	True	-10	True	GridWorld	SUNY	FullObsDiscrete	Individual_Q	1.0	0.05	1000000	0	True	IndivQLearningTabularSweepMillionSteps/130_13_0_centralized	centralized	0.05
IndivQLearningTabularSweepMillionSteps/130_13_0	decentralized	True	-10	True	GridWorld	SUNY	FullObsDiscrete	Individual_Q	1.0	0.05	1000000	0	True	IndivQLearningTabularSweepMillionSteps/130_13_0_decentralized	decentralized	0.05
IndivQLearningTabularSweepMillionSteps/130_13_0	decentralized	True	-10	True	GridWorld	SUNY	FullObsDiscrete	Individual_Q	1.0	0.05	1000000	0	True	IndivQLearningTabularSweepMillionSteps/130_13_0_none	none	0.05
IndivQLearningTabularSweepMillionSteps/131_13_1	decentralized	True	-10	True	GridWorld	SUNY	FullObsDiscrete	Individual_Q	1.0	0.05	1000000	1	True	IndivQLearningTabularSweepMillionSteps/131_13_1_centralized	centralized	0.05
IndivQLearningTabularSweepMillionSteps/131_13_1	decentralized	True	-10	True	GridWorld	SUNY	FullObsDiscrete	Individual_Q	1.0	0.05	1000000	1	True	IndivQLearningTabularSweepMillionSteps/131_13_1_decentralized	decentralized	0.05
IndivQLearningTabularSweepMillionSteps/131_13_1	decentralized	True	-10	True	GridWorld	SUNY	FullObsDiscrete	Individual_Q	1.0	0.05	1000000	1	True	IndivQLearningTabularSweepMillionSteps/131_13_1_none	none	0.05
IndivQLearningTabularSweepMillionSteps/132_13_2	decentralized	True	-10	True	GridWorld	SUNY	FullObsDiscrete	Individual_Q	1.0	0.05	1000000	2	True	IndivQLearningTabularSweepMillionSteps/132_13_2_centralized	centralized	0.05
IndivQLearningTabularSweepMillionSteps/132_13_2	decentralized	True	-10	True	GridWorld	SUNY	FullObsDiscrete	Individual_Q	1.0	0.05	1000000	2	True	IndivQLearningTabularSweepMillionSteps/132_13_2_decentralized	decentralized	0.05
IndivQLearningTabularSweepMillionSteps/132_13_2	decentralized	True	-10	True	GridWorld	SUNY	FullObsDiscrete	Individual_Q	1.0	0.05	1000000	2	True	IndivQLearningTabularSweepMillionSteps/132_13_2_none	none	0.05
IndivQLearningTabularSweepMillionSteps/133_13_3	decentralized	True	-10	True	GridWorld	SUNY	FullObsDiscrete	Individual_Q	1.0	0.05	1000000	3	True	IndivQLearningTabularSweepMillionSteps/133_13_3_centralized	centralized	0.05
IndivQLearningTabularSweepMillionSteps/133_13_3	decentralized	True	-10	True	GridWorld	SUNY	FullObsDiscrete	Individual_Q	1.0	0.05	1000000	3	True	IndivQLearningTabularSweepMillionSteps/133_13_3_decentralized	decentralized	0.05
IndivQLearningTabularSweepMillionSteps/133_13_3	decentralized	True	-10	True	GridWorld	SUNY	FullObsDiscrete	Individual_Q	1.0	0.05	1000000	3	True	IndivQLearningTabularSweepMillionSteps/133_13_3_none	none	0.05
IndivQLearningTabularSweepMillionSteps/134_13_4	decentralized	True	-10	True	GridWorld	SUNY	FullObsDiscrete	Individual_Q	1.0	0.05	1000000	4	True	IndivQLearningTabularSweepMillionSteps/134_13_4_centralized	centralized	0.05
IndivQLearningTabularSweepMillionSteps/134_13_4	decentralized	True	-10	True	GridWorld	SUNY	FullObsDiscrete	Individual_Q	1.0	0.05	1000000	4	True	IndivQLearningTabularSweepMillionSteps/134_13_4_decentralized	decentralized	0.05
IndivQLearningTabularSweepMillionSteps/134_13_4	decentralized	True	-10	True	GridWorld	SUNY	FullObsDiscrete	Individual_Q	1.0	0.05	1000000	4	True	IndivQLearningTabularSweepMillionSteps/134_13_4_none	none	0.05
IndivQLearningTabularSweepMillionSteps/135_13_5	decentralized	True	-10	True	GridWorld	SUNY	FullObsDiscrete	Individual_Q	1.0	0.05	1000000	5	True	IndivQLearningTabularSweepMillionSteps/135_13_5_centralized	centralized	0.05
IndivQLearningTabularSweepMillionSteps/135_13_5	decentralized	True	-10	True	GridWorld	SUNY	FullObsDiscrete	Individual_Q	1.0	0.05	1000000	5	True	IndivQLearningTabularSweepMillionSteps/135_13_5_decentralized	decentralized	0.05
IndivQLearningTabularSweepMillionSteps/135_13_5	decentralized	True	-10	True	GridWorld	SUNY	FullObsDiscrete	Individual_Q	1.0	0.05	1000000	5	True	IndivQLearningTabularSweepMillionSteps/135_13_5_none	none	0.05
IndivQLearningTabularSweepMillionSteps/136_13_6	decentralized	True	-10	True	GridWorld	SUNY	FullObsDiscrete	Individual_Q	1.0	0.05	1000000	6	True	IndivQLearningTabularSweepMillionSteps/136_13_6_centralized	centralized	0.05
IndivQLearningTabularSweepMillionSteps/136_13_6	decentralized	True	-10	True	GridWorld	SUNY	FullObsDiscrete	Individual_Q	1.0	0.05	1000000	6	True	IndivQLearningTabularSweepMillionSteps/136_13_6_decentralized	decentralized	0.05
IndivQLearningTabularSweepMillionSteps/136_13_6	decentralized	True	-10	True	GridWorld	SUNY	FullObsDiscrete	Individual_Q	1.0	0.05	1000000	6	True	IndivQLearningTabularSweepMillionSteps/136_13_6_none	none	0.05
IndivQLearningTabularSweepMillionSteps/137_13_7	decentralized	True	-10	True	GridWorld	SUNY	FullObsDiscrete	Individual_Q	1.0	0.05	1000000	7	True	IndivQLearningTabularSweepMillionSteps/137_13_7_centralized	centralized	0.05
IndivQLearningTabularSweepMillionSteps/137_13_7	decentralized	True	-10	True	GridWorld	SUNY	FullObsDiscrete	Individual_Q	1.0	0.05	1000000	7	True	IndivQLearningTabularSweepMillionSteps/137_13_7_decentralized	decentralized	0.05
IndivQLearningTabularSweepMillionSteps/137_13_7	decentralized	True	-10	True	GridWorld	SUNY	FullObsDiscrete	Individual_Q	1.0	0.05	1000000	7	True	IndivQLearningTabularSweepMillionSteps/137_13_7_none	none	0.05
IndivQLearningTabularSweepMillionSteps/138_13_8	decentralized	True	-10	True	GridWorld	SUNY	FullObsDiscrete	Individual_Q	1.0	0.05	1000000	8	True	IndivQLearningTabularSweepMillionSteps/138_13_8_centralized	centralized	0.05
IndivQLearningTabularSweepMillionSteps/138_13_8	decentralized	True	-10	True	GridWorld	SUNY	FullObsDiscrete	Individual_Q	1.0	0.05	1000000	8	True	IndivQLearningTabularSweepMillionSteps/138_13_8_decentralized	decentralized	0.05
IndivQLearningTabularSweepMillionSteps/138_13_8	decentralized	True	-10	True	GridWorld	SUNY	FullObsDiscrete	Individual_Q	1.0	0.05	1000000	8	True	IndivQLearningTabularSweepMillionSteps/138_13_8_none	none	0.05
IndivQLearningTabularSweepMillionSteps/139_13_9	decentralized	True	-10	True	GridWorld	SUNY	FullObsDiscrete	Individual_Q	1.0	0.05	1000000	9	True	IndivQLearningTabularSweepMillionSteps/139_13_9_centralized	centralized	0.05
IndivQLearningTabularSweepMillionSteps/139_13_9	decentralized	True	-10	True	GridWorld	SUNY	FullObsDiscrete	Individual_Q	1.0	0.05	1000000	9	True	IndivQLearningTabularSweepMillionSteps/139_13_9_decentralized	decentralized	0.05
IndivQLearningTabularSweepMillionSteps/139_13_9	decentralized	True	-10	True	GridWorld	SUNY	FullObsDiscrete	Individual_Q	1.0	0.05	1000000	9	True	IndivQLearningTabularSweepMillionSteps/139_13_9_none	none	0.05
IndivQLearningTabularSweepMillionSteps/140_14_0	none	True	-10	True	GridWorld	SUNY	FullObsDiscrete	Individual_Q	1.0	0.05	1000000	0	True	IndivQLearningTabularSweepMillionSteps/140_14_0_centralized	centralized	0.05
IndivQLearningTabularSweepMillionSteps/140_14_0	none	True	-10	True	GridWorld	SUNY	FullObsDiscrete	Individual_Q	1.0	0.05	1000000	0	True	IndivQLearningTabularSweepMillionSteps/140_14_0_decentralized	decentralized	0.05
IndivQLearningTabularSweepMillionSteps/140_14_0	none	True	-10	True	GridWorld	SUNY	FullObsDiscrete	Individual_Q	1.0	0.05	1000000	0	True	IndivQLearningTabularSweepMillionSteps/140_14_0_none	none	0.05
IndivQLearningTabularSweepMillionSteps/141_14_1	none	True	-10	True	GridWorld	SUNY	FullObsDiscrete	Individual_Q	1.0	0.05	1000000	1	True	IndivQLearningTabularSweepMillionSteps/141_14_1_centralized	centralized	0.05
IndivQLearningTabularSweepMillionSteps/141_14_1	none	True	-10	True	GridWorld	SUNY	FullObsDiscrete	Individual_Q	1.0	0.05	1000000	1	True	IndivQLearningTabularSweepMillionSteps/141_14_1_decentralized	decentralized	0.05
IndivQLearningTabularSweepMillionSteps/141_14_1	none	True	-10	True	GridWorld	SUNY	FullObsDiscrete	Individual_Q	1.0	0.05	1000000	1	True	IndivQLearningTabularSweepMillionSteps/141_14_1_none	none	0.05
IndivQLearningTabularSweepMillionSteps/142_14_2	none	True	-10	True	GridWorld	SUNY	FullObsDiscrete	Individual_Q	1.0	0.05	1000000	2	True	IndivQLearningTabularSweepMillionSteps/142_14_2_centralized	centralized	0.05
IndivQLearningTabularSweepMillionSteps/142_14_2	none	True	-10	True	GridWorld	SUNY	FullObsDiscrete	Individual_Q	1.0	0.05	1000000	2	True	IndivQLearningTabularSweepMillionSteps/142_14_2_decentralized	decentralized	0.05
IndivQLearningTabularSweepMillionSteps/142_14_2	none	True	-10	True	GridWorld	SUNY	FullObsDiscrete	Individual_Q	1.0	0.05	1000000	2	True	IndivQLearningTabularSweepMillionSteps/142_14_2_none	none	0.05
IndivQLearningTabularSweepMillionSteps/143_14_3	none	True	-10	True	GridWorld	SUNY	FullObsDiscrete	Individual_Q	1.0	0.05	1000000	3	True	IndivQLearningTabularSweepMillionSteps/143_14_3_centralized	centralized	0.05
IndivQLearningTabularSweepMillionSteps/143_14_3	none	True	-10	True	GridWorld	SUNY	FullObsDiscrete	Individual_Q	1.0	0.05	1000000	3	True	IndivQLearningTabularSweepMillionSteps/143_14_3_decentralized	decentralized	0.05
IndivQLearningTabularSweepMillionSteps/143_14_3	none	True	-10	True	GridWorld	SUNY	FullObsDiscrete	Individual_Q	1.0	0.05	1000000	3	True	IndivQLearningTabularSweepMillionSteps/143_14_3_none	none	0.05
IndivQLearningTabularSweepMillionSteps/144_14_4	none	True	-10	True	GridWorld	SUNY	FullObsDiscrete	Individual_Q	1.0	0.05	1000000	4	True	IndivQLearningTabularSweepMillionSteps/144_14_4_centralized	centralized	0.05
IndivQLearningTabularSweepMillionSteps/144_14_4	none	True	-10	True	GridWorld	SUNY	FullObsDiscrete	Individual_Q	1.0	0.05	1000000	4	True	IndivQLearningTabularSweepMillionSteps/144_14_4_decentralized	decentralized	0.05
IndivQLearningTabularSweepMillionSteps/144_14_4	none	True	-10	True	GridWorld	SUNY	FullObsDiscrete	Individual_Q	1.0	0.05	1000000	4	True	IndivQLearningTabularSweepMillionSteps/144_14_4_none	none	0.05
IndivQLearningTabularSweepMillionSteps/145_14_5	none	True	-10	True	GridWorld	SUNY	FullObsDiscrete	Individual_Q	1.0	0.05	1000000	5	True	IndivQLearningTabularSweepMillionSteps/145_14_5_centralized	centralized	0.05
IndivQLearningTabularSweepMillionSteps/145_14_5	none	True	-10	True	GridWorld	SUNY	FullObsDiscrete	Individual_Q	1.0	0.05	1000000	5	True	IndivQLearningTabularSweepMillionSteps/145_14_5_decentralized	decentralized	0.05
IndivQLearningTabularSweepMillionSteps/145_14_5	none	True	-10	True	GridWorld	SUNY	FullObsDiscrete	Individual_Q	1.0	0.05	1000000	5	True	IndivQLearningTabularSweepMillionSteps/145_14_5_none	none	0.05
IndivQLearningTabularSweepMillionSteps/146_14_6	none	True	-10	True	GridWorld	SUNY	FullObsDiscrete	Individual_Q	1.0	0.05	1000000	6	True	IndivQLearningTabularSweepMillionSteps/146_14_6_centralized	centralized	0.05
IndivQLearningTabularSweepMillionSteps/146_14_6	none	True	-10	True	GridWorld	SUNY	FullObsDiscrete	Individual_Q	1.0	0.05	1000000	6	True	IndivQLearningTabularSweepMillionSteps/146_14_6_decentralized	decentralized	0.05
IndivQLearningTabularSweepMillionSteps/146_14_6	none	True	-10	True	GridWorld	SUNY	FullObsDiscrete	Individual_Q	1.0	0.05	1000000	6	True	IndivQLearningTabularSweepMillionSteps/146_14_6_none	none	0.05
IndivQLearningTabularSweepMillionSteps/147_14_7	none	True	-10	True	GridWorld	SUNY	FullObsDiscrete	Individual_Q	1.0	0.05	1000000	7	True	IndivQLearningTabularSweepMillionSteps/147_14_7_centralized	centralized	0.05
IndivQLearningTabularSweepMillionSteps/147_14_7	none	True	-10	True	GridWorld	SUNY	FullObsDiscrete	Individual_Q	1.0	0.05	1000000	7	True	IndivQLearningTabularSweepMillionSteps/147_14_7_decentralized	decentralized	0.05
IndivQLearningTabularSweepMillionSteps/147_14_7	none	True	-10	True	GridWorld	SUNY	FullObsDiscrete	Individual_Q	1.0	0.05	1000000	7	True	IndivQLearningTabularSweepMillionSteps/147_14_7_none	none	0.05
IndivQLearningTabularSweepMillionSteps/148_14_8	none	True	-10	True	GridWorld	SUNY	FullObsDiscrete	Individual_Q	1.0	0.05	1000000	8	True	IndivQLearningTabularSweepMillionSteps/148_14_8_centralized	centralized	0.05
IndivQLearningTabularSweepMillionSteps/148_14_8	none	True	-10	True	GridWorld	SUNY	FullObsDiscrete	Individual_Q	1.0	0.05	1000000	8	True	IndivQLearningTabularSweepMillionSteps/148_14_8_decentralized	decentralized	0.05
IndivQLearningTabularSweepMillionSteps/148_14_8	none	True	-10	True	GridWorld	SUNY	FullObsDiscrete	Individual_Q	1.0	0.05	1000000	8	True	IndivQLearningTabularSweepMillionSteps/148_14_8_none	none	0.05
IndivQLearningTabularSweepMillionSteps/149_14_9	none	True	-10	True	GridWorld	SUNY	FullObsDiscrete	Individual_Q	1.0	0.05	1000000	9	True	IndivQLearningTabularSweepMillionSteps/149_14_9_centralized	centralized	0.05
IndivQLearningTabularSweepMillionSteps/149_14_9	none	True	-10	True	GridWorld	SUNY	FullObsDiscrete	Individual_Q	1.0	0.05	1000000	9	True	IndivQLearningTabularSweepMillionSteps/149_14_9_decentralized	decentralized	0.05
IndivQLearningTabularSweepMillionSteps/149_14_9	none	True	-10	True	GridWorld	SUNY	FullObsDiscrete	Individual_Q	1.0	0.05	1000000	9	True	IndivQLearningTabularSweepMillionSteps/149_14_9_none	none	0.05
IndivQLearningTabularSweepMillionSteps/150_15_0	centralized	True	-10	False	GridWorld	SUNY	FullObsDiscrete	Individual_Q	1.0	0.05	1000000	0	True	IndivQLearningTabularSweepMillionSteps/150_15_0_centralized	centralized	0.05
IndivQLearningTabularSweepMillionSteps/150_15_0	centralized	True	-10	False	GridWorld	SUNY	FullObsDiscrete	Individual_Q	1.0	0.05	1000000	0	True	IndivQLearningTabularSweepMillionSteps/150_15_0_decentralized	decentralized	0.05
IndivQLearningTabularSweepMillionSteps/150_15_0	centralized	True	-10	False	GridWorld	SUNY	FullObsDiscrete	Individual_Q	1.0	0.05	1000000	0	True	IndivQLearningTabularSweepMillionSteps/150_15_0_none	none	0.05
IndivQLearningTabularSweepMillionSteps/151_15_1	centralized	True	-10	False	GridWorld	SUNY	FullObsDiscrete	Individual_Q	1.0	0.05	1000000	1	True	IndivQLearningTabularSweepMillionSteps/151_15_1_centralized	centralized	0.05
IndivQLearningTabularSweepMillionSteps/151_15_1	centralized	True	-10	False	GridWorld	SUNY	FullObsDiscrete	Individual_Q	1.0	0.05	1000000	1	True	IndivQLearningTabularSweepMillionSteps/151_15_1_decentralized	decentralized	0.05
IndivQLearningTabularSweepMillionSteps/151_15_1	centralized	True	-10	False	GridWorld	SUNY	FullObsDiscrete	Individual_Q	1.0	0.05	1000000	1	True	IndivQLearningTabularSweepMillionSteps/151_15_1_none	none	0.05
IndivQLearningTabularSweepMillionSteps/152_15_2	centralized	True	-10	False	GridWorld	SUNY	FullObsDiscrete	Individual_Q	1.0	0.05	1000000	2	True	IndivQLearningTabularSweepMillionSteps/152_15_2_centralized	centralized	0.05
IndivQLearningTabularSweepMillionSteps/152_15_2	centralized	True	-10	False	GridWorld	SUNY	FullObsDiscrete	Individual_Q	1.0	0.05	1000000	2	True	IndivQLearningTabularSweepMillionSteps/152_15_2_decentralized	decentralized	0.05
IndivQLearningTabularSweepMillionSteps/152_15_2	centralized	True	-10	False	GridWorld	SUNY	FullObsDiscrete	Individual_Q	1.0	0.05	1000000	2	True	IndivQLearningTabularSweepMillionSteps/152_15_2_none	none	0.05
IndivQLearningTabularSweepMillionSteps/153_15_3	centralized	True	-10	False	GridWorld	SUNY	FullObsDiscrete	Individual_Q	1.0	0.05	1000000	3	True	IndivQLearningTabularSweepMillionSteps/153_15_3_centralized	centralized	0.05
IndivQLearningTabularSweepMillionSteps/153_15_3	centralized	True	-10	False	GridWorld	SUNY	FullObsDiscrete	Individual_Q	1.0	0.05	1000000	3	True	IndivQLearningTabularSweepMillionSteps/153_15_3_decentralized	decentralized	0.05
IndivQLearningTabularSweepMillionSteps/153_15_3	centralized	True	-10	False	GridWorld	SUNY	FullObsDiscrete	Individual_Q	1.0	0.05	1000000	3	True	IndivQLearningTabularSweepMillionSteps/153_15_3_none	none	0.05
IndivQLearningTabularSweepMillionSteps/154_15_4	centralized	True	-10	False	GridWorld	SUNY	FullObsDiscrete	Individual_Q	1.0	0.05	1000000	4	True	IndivQLearningTabularSweepMillionSteps/154_15_4_centralized	centralized	0.05
IndivQLearningTabularSweepMillionSteps/154_15_4	centralized	True	-10	False	GridWorld	SUNY	FullObsDiscrete	Individual_Q	1.0	0.05	1000000	4	True	IndivQLearningTabularSweepMillionSteps/154_15_4_decentralized	decentralized	0.05
IndivQLearningTabularSweepMillionSteps/154_15_4	centralized	True	-10	False	GridWorld	SUNY	FullObsDiscrete	Individual_Q	1.0	0.05	1000000	4	True	IndivQLearningTabularSweepMillionSteps/154_15_4_none	none	0.05
IndivQLearningTabularSweepMillionSteps/155_15_5	centralized	True	-10	False	GridWorld	SUNY	FullObsDiscrete	Individual_Q	1.0	0.05	1000000	5	True	IndivQLearningTabularSweepMillionSteps/155_15_5_centralized	centralized	0.05
IndivQLearningTabularSweepMillionSteps/155_15_5	centralized	True	-10	False	GridWorld	SUNY	FullObsDiscrete	Individual_Q	1.0	0.05	1000000	5	True	IndivQLearningTabularSweepMillionSteps/155_15_5_decentralized	decentralized	0.05
IndivQLearningTabularSweepMillionSteps/155_15_5	centralized	True	-10	False	GridWorld	SUNY	FullObsDiscrete	Individual_Q	1.0	0.05	1000000	5	True	IndivQLearningTabularSweepMillionSteps/155_15_5_none	none	0.05
IndivQLearningTabularSweepMillionSteps/156_15_6	centralized	True	-10	False	GridWorld	SUNY	FullObsDiscrete	Individual_Q	1.0	0.05	1000000	6	True	IndivQLearningTabularSweepMillionSteps/156_15_6_centralized	centralized	0.05
IndivQLearningTabularSweepMillionSteps/156_15_6	centralized	True	-10	False	GridWorld	SUNY	FullObsDiscrete	Individual_Q	1.0	0.05	1000000	6	True	IndivQLearningTabularSweepMillionSteps/156_15_6_decentralized	decentralized	0.05
IndivQLearningTabularSweepMillionSteps/156_15_6	centralized	True	-10	False	GridWorld	SUNY	FullObsDiscrete	Individual_Q	1.0	0.05	1000000	6	True	IndivQLearningTabularSweepMillionSteps/156_15_6_none	none	0.05
IndivQLearningTabularSweepMillionSteps/157_15_7	centralized	True	-10	False	GridWorld	SUNY	FullObsDiscrete	Individual_Q	1.0	0.05	1000000	7	True	IndivQLearningTabularSweepMillionSteps/157_15_7_centralized	centralized	0.05
IndivQLearningTabularSweepMillionSteps/157_15_7	centralized	True	-10	False	GridWorld	SUNY	FullObsDiscrete	Individual_Q	1.0	0.05	1000000	7	True	IndivQLearningTabularSweepMillionSteps/157_15_7_decentralized	decentralized	0.05
IndivQLearningTabularSweepMillionSteps/157_15_7	centralized	True	-10	False	GridWorld	SUNY	FullObsDiscrete	Individual_Q	1.0	0.05	1000000	7	True	IndivQLearningTabularSweepMillionSteps/157_15_7_none	none	0.05
IndivQLearningTabularSweepMillionSteps/158_15_8	centralized	True	-10	False	GridWorld	SUNY	FullObsDiscrete	Individual_Q	1.0	0.05	1000000	8	True	IndivQLearningTabularSweepMillionSteps/158_15_8_centralized	centralized	0.05
IndivQLearningTabularSweepMillionSteps/158_15_8	centralized	True	-10	False	GridWorld	SUNY	FullObsDiscrete	Individual_Q	1.0	0.05	1000000	8	True	IndivQLearningTabularSweepMillionSteps/158_15_8_decentralized	decentralized	0.05
IndivQLearningTabularSweepMillionSteps/158_15_8	centralized	True	-10	False	GridWorld	SUNY	FullObsDiscrete	Individual_Q	1.0	0.05	1000000	8	True	IndivQLearningTabularSweepMillionSteps/158_15_8_none	none	0.05
IndivQLearningTabularSweepMillionSteps/159_15_9	centralized	True	-10	False	GridWorld	SUNY	FullObsDiscrete	Individual_Q	1.0	0.05	1000000	9	True	IndivQLearningTabularSweepMillionSteps/159_15_9_centralized	centralized	0.05
IndivQLearningTabularSweepMillionSteps/159_15_9	centralized	True	-10	False	GridWorld	SUNY	FullObsDiscrete	Individual_Q	1.0	0.05	1000000	9	True	IndivQLearningTabularSweepMillionSteps/159_15_9_decentralized	decentralized	0.05
IndivQLearningTabularSweepMillionSteps/159_15_9	centralized	True	-10	False	GridWorld	SUNY	FullObsDiscrete	Individual_Q	1.0	0.05	1000000	9	True	IndivQLearningTabularSweepMillionSteps/159_15_9_none	none	0.05
IndivQLearningTabularSweepMillionSteps/160_16_0	decentralized	True	-10	False	GridWorld	SUNY	FullObsDiscrete	Individual_Q	1.0	0.05	1000000	0	True	IndivQLearningTabularSweepMillionSteps/160_16_0_centralized	centralized	0.05
IndivQLearningTabularSweepMillionSteps/160_16_0	decentralized	True	-10	False	GridWorld	SUNY	FullObsDiscrete	Individual_Q	1.0	0.05	1000000	0	True	IndivQLearningTabularSweepMillionSteps/160_16_0_decentralized	decentralized	0.05
IndivQLearningTabularSweepMillionSteps/160_16_0	decentralized	True	-10	False	GridWorld	SUNY	FullObsDiscrete	Individual_Q	1.0	0.05	1000000	0	True	IndivQLearningTabularSweepMillionSteps/160_16_0_none	none	0.05
IndivQLearningTabularSweepMillionSteps/161_16_1	decentralized	True	-10	False	GridWorld	SUNY	FullObsDiscrete	Individual_Q	1.0	0.05	1000000	1	True	IndivQLearningTabularSweepMillionSteps/161_16_1_centralized	centralized	0.05
IndivQLearningTabularSweepMillionSteps/161_16_1	decentralized	True	-10	False	GridWorld	SUNY	FullObsDiscrete	Individual_Q	1.0	0.05	1000000	1	True	IndivQLearningTabularSweepMillionSteps/161_16_1_decentralized	decentralized	0.05
IndivQLearningTabularSweepMillionSteps/161_16_1	decentralized	True	-10	False	GridWorld	SUNY	FullObsDiscrete	Individual_Q	1.0	0.05	1000000	1	True	IndivQLearningTabularSweepMillionSteps/161_16_1_none	none	0.05
IndivQLearningTabularSweepMillionSteps/162_16_2	decentralized	True	-10	False	GridWorld	SUNY	FullObsDiscrete	Individual_Q	1.0	0.05	1000000	2	True	IndivQLearningTabularSweepMillionSteps/162_16_2_centralized	centralized	0.05
IndivQLearningTabularSweepMillionSteps/162_16_2	decentralized	True	-10	False	GridWorld	SUNY	FullObsDiscrete	Individual_Q	1.0	0.05	1000000	2	True	IndivQLearningTabularSweepMillionSteps/162_16_2_decentralized	decentralized	0.05
IndivQLearningTabularSweepMillionSteps/162_16_2	decentralized	True	-10	False	GridWorld	SUNY	FullObsDiscrete	Individual_Q	1.0	0.05	1000000	2	True	IndivQLearningTabularSweepMillionSteps/162_16_2_none	none	0.05
IndivQLearningTabularSweepMillionSteps/163_16_3	decentralized	True	-10	False	GridWorld	SUNY	FullObsDiscrete	Individual_Q	1.0	0.05	1000000	3	True	IndivQLearningTabularSweepMillionSteps/163_16_3_centralized	centralized	0.05
IndivQLearningTabularSweepMillionSteps/163_16_3	decentralized	True	-10	False	GridWorld	SUNY	FullObsDiscrete	Individual_Q	1.0	0.05	1000000	3	True	IndivQLearningTabularSweepMillionSteps/163_16_3_decentralized	decentralized	0.05
IndivQLearningTabularSweepMillionSteps/163_16_3	decentralized	True	-10	False	GridWorld	SUNY	FullObsDiscrete	Individual_Q	1.0	0.05	1000000	3	True	IndivQLearningTabularSweepMillionSteps/163_16_3_none	none	0.05
IndivQLearningTabularSweepMillionSteps/164_16_4	decentralized	True	-10	False	GridWorld	SUNY	FullObsDiscrete	Individual_Q	1.0	0.05	1000000	4	True	IndivQLearningTabularSweepMillionSteps/164_16_4_centralized	centralized	0.05
IndivQLearningTabularSweepMillionSteps/164_16_4	decentralized	True	-10	False	GridWorld	SUNY	FullObsDiscrete	Individual_Q	1.0	0.05	1000000	4	True	IndivQLearningTabularSweepMillionSteps/164_16_4_decentralized	decentralized	0.05
IndivQLearningTabularSweepMillionSteps/164_16_4	decentralized	True	-10	False	GridWorld	SUNY	FullObsDiscrete	Individual_Q	1.0	0.05	1000000	4	True	IndivQLearningTabularSweepMillionSteps/164_16_4_none	none	0.05
IndivQLearningTabularSweepMillionSteps/165_16_5	decentralized	True	-10	False	GridWorld	SUNY	FullObsDiscrete	Individual_Q	1.0	0.05	1000000	5	True	IndivQLearningTabularSweepMillionSteps/165_16_5_centralized	centralized	0.05
IndivQLearningTabularSweepMillionSteps/165_16_5	decentralized	True	-10	False	GridWorld	SUNY	FullObsDiscrete	Individual_Q	1.0	0.05	1000000	5	True	IndivQLearningTabularSweepMillionSteps/165_16_5_decentralized	decentralized	0.05
IndivQLearningTabularSweepMillionSteps/165_16_5	decentralized	True	-10	False	GridWorld	SUNY	FullObsDiscrete	Individual_Q	1.0	0.05	1000000	5	True	IndivQLearningTabularSweepMillionSteps/165_16_5_none	none	0.05
IndivQLearningTabularSweepMillionSteps/166_16_6	decentralized	True	-10	False	GridWorld	SUNY	FullObsDiscrete	Individual_Q	1.0	0.05	1000000	6	True	IndivQLearningTabularSweepMillionSteps/166_16_6_centralized	centralized	0.05
IndivQLearningTabularSweepMillionSteps/166_16_6	decentralized	True	-10	False	GridWorld	SUNY	FullObsDiscrete	Individual_Q	1.0	0.05	1000000	6	True	IndivQLearningTabularSweepMillionSteps/166_16_6_decentralized	decentralized	0.05
IndivQLearningTabularSweepMillionSteps/166_16_6	decentralized	True	-10	False	GridWorld	SUNY	FullObsDiscrete	Individual_Q	1.0	0.05	1000000	6	True	IndivQLearningTabularSweepMillionSteps/166_16_6_none	none	0.05
IndivQLearningTabularSweepMillionSteps/167_16_7	decentralized	True	-10	False	GridWorld	SUNY	FullObsDiscrete	Individual_Q	1.0	0.05	1000000	7	True	IndivQLearningTabularSweepMillionSteps/167_16_7_centralized	centralized	0.05
IndivQLearningTabularSweepMillionSteps/167_16_7	decentralized	True	-10	False	GridWorld	SUNY	FullObsDiscrete	Individual_Q	1.0	0.05	1000000	7	True	IndivQLearningTabularSweepMillionSteps/167_16_7_decentralized	decentralized	0.05
IndivQLearningTabularSweepMillionSteps/167_16_7	decentralized	True	-10	False	GridWorld	SUNY	FullObsDiscrete	Individual_Q	1.0	0.05	1000000	7	True	IndivQLearningTabularSweepMillionSteps/167_16_7_none	none	0.05
IndivQLearningTabularSweepMillionSteps/168_16_8	decentralized	True	-10	False	GridWorld	SUNY	FullObsDiscrete	Individual_Q	1.0	0.05	1000000	8	True	IndivQLearningTabularSweepMillionSteps/168_16_8_centralized	centralized	0.05
IndivQLearningTabularSweepMillionSteps/168_16_8	decentralized	True	-10	False	GridWorld	SUNY	FullObsDiscrete	Individual_Q	1.0	0.05	1000000	8	True	IndivQLearningTabularSweepMillionSteps/168_16_8_decentralized	decentralized	0.05
IndivQLearningTabularSweepMillionSteps/168_16_8	decentralized	True	-10	False	GridWorld	SUNY	FullObsDiscrete	Individual_Q	1.0	0.05	1000000	8	True	IndivQLearningTabularSweepMillionSteps/168_16_8_none	none	0.05
IndivQLearningTabularSweepMillionSteps/169_16_9	decentralized	True	-10	False	GridWorld	SUNY	FullObsDiscrete	Individual_Q	1.0	0.05	1000000	9	True	IndivQLearningTabularSweepMillionSteps/169_16_9_centralized	centralized	0.05
IndivQLearningTabularSweepMillionSteps/169_16_9	decentralized	True	-10	False	GridWorld	SUNY	FullObsDiscrete	Individual_Q	1.0	0.05	1000000	9	True	IndivQLearningTabularSweepMillionSteps/169_16_9_decentralized	decentralized	0.05
IndivQLearningTabularSweepMillionSteps/169_16_9	decentralized	True	-10	False	GridWorld	SUNY	FullObsDiscrete	Individual_Q	1.0	0.05	1000000	9	True	IndivQLearningTabularSweepMillionSteps/169_16_9_none	none	0.05
IndivQLearningTabularSweepMillionSteps/170_17_0	none	True	-10	False	GridWorld	SUNY	FullObsDiscrete	Individual_Q	1.0	0.05	1000000	0	True	IndivQLearningTabularSweepMillionSteps/170_17_0_centralized	centralized	0.05
IndivQLearningTabularSweepMillionSteps/170_17_0	none	True	-10	False	GridWorld	SUNY	FullObsDiscrete	Individual_Q	1.0	0.05	1000000	0	True	IndivQLearningTabularSweepMillionSteps/170_17_0_decentralized	decentralized	0.05
IndivQLearningTabularSweepMillionSteps/170_17_0	none	True	-10	False	GridWorld	SUNY	FullObsDiscrete	Individual_Q	1.0	0.05	1000000	0	True	IndivQLearningTabularSweepMillionSteps/170_17_0_none	none	0.05
IndivQLearningTabularSweepMillionSteps/171_17_1	none	True	-10	False	GridWorld	SUNY	FullObsDiscrete	Individual_Q	1.0	0.05	1000000	1	True	IndivQLearningTabularSweepMillionSteps/171_17_1_centralized	centralized	0.05
IndivQLearningTabularSweepMillionSteps/171_17_1	none	True	-10	False	GridWorld	SUNY	FullObsDiscrete	Individual_Q	1.0	0.05	1000000	1	True	IndivQLearningTabularSweepMillionSteps/171_17_1_decentralized	decentralized	0.05
IndivQLearningTabularSweepMillionSteps/171_17_1	none	True	-10	False	GridWorld	SUNY	FullObsDiscrete	Individual_Q	1.0	0.05	1000000	1	True	IndivQLearningTabularSweepMillionSteps/171_17_1_none	none	0.05
IndivQLearningTabularSweepMillionSteps/172_17_2	none	True	-10	False	GridWorld	SUNY	FullObsDiscrete	Individual_Q	1.0	0.05	1000000	2	True	IndivQLearningTabularSweepMillionSteps/172_17_2_centralized	centralized	0.05
IndivQLearningTabularSweepMillionSteps/172_17_2	none	True	-10	False	GridWorld	SUNY	FullObsDiscrete	Individual_Q	1.0	0.05	1000000	2	True	IndivQLearningTabularSweepMillionSteps/172_17_2_decentralized	decentralized	0.05
IndivQLearningTabularSweepMillionSteps/172_17_2	none	True	-10	False	GridWorld	SUNY	FullObsDiscrete	Individual_Q	1.0	0.05	1000000	2	True	IndivQLearningTabularSweepMillionSteps/172_17_2_none	none	0.05
IndivQLearningTabularSweepMillionSteps/173_17_3	none	True	-10	False	GridWorld	SUNY	FullObsDiscrete	Individual_Q	1.0	0.05	1000000	3	True	IndivQLearningTabularSweepMillionSteps/173_17_3_centralized	centralized	0.05
IndivQLearningTabularSweepMillionSteps/173_17_3	none	True	-10	False	GridWorld	SUNY	FullObsDiscrete	Individual_Q	1.0	0.05	1000000	3	True	IndivQLearningTabularSweepMillionSteps/173_17_3_decentralized	decentralized	0.05
IndivQLearningTabularSweepMillionSteps/173_17_3	none	True	-10	False	GridWorld	SUNY	FullObsDiscrete	Individual_Q	1.0	0.05	1000000	3	True	IndivQLearningTabularSweepMillionSteps/173_17_3_none	none	0.05
IndivQLearningTabularSweepMillionSteps/174_17_4	none	True	-10	False	GridWorld	SUNY	FullObsDiscrete	Individual_Q	1.0	0.05	1000000	4	True	IndivQLearningTabularSweepMillionSteps/174_17_4_centralized	centralized	0.05
IndivQLearningTabularSweepMillionSteps/174_17_4	none	True	-10	False	GridWorld	SUNY	FullObsDiscrete	Individual_Q	1.0	0.05	1000000	4	True	IndivQLearningTabularSweepMillionSteps/174_17_4_decentralized	decentralized	0.05
IndivQLearningTabularSweepMillionSteps/174_17_4	none	True	-10	False	GridWorld	SUNY	FullObsDiscrete	Individual_Q	1.0	0.05	1000000	4	True	IndivQLearningTabularSweepMillionSteps/174_17_4_none	none	0.05
IndivQLearningTabularSweepMillionSteps/175_17_5	none	True	-10	False	GridWorld	SUNY	FullObsDiscrete	Individual_Q	1.0	0.05	1000000	5	True	IndivQLearningTabularSweepMillionSteps/175_17_5_centralized	centralized	0.05
IndivQLearningTabularSweepMillionSteps/175_17_5	none	True	-10	False	GridWorld	SUNY	FullObsDiscrete	Individual_Q	1.0	0.05	1000000	5	True	IndivQLearningTabularSweepMillionSteps/175_17_5_decentralized	decentralized	0.05
IndivQLearningTabularSweepMillionSteps/175_17_5	none	True	-10	False	GridWorld	SUNY	FullObsDiscrete	Individual_Q	1.0	0.05	1000000	5	True	IndivQLearningTabularSweepMillionSteps/175_17_5_none	none	0.05
IndivQLearningTabularSweepMillionSteps/176_17_6	none	True	-10	False	GridWorld	SUNY	FullObsDiscrete	Individual_Q	1.0	0.05	1000000	6	True	IndivQLearningTabularSweepMillionSteps/176_17_6_centralized	centralized	0.05
IndivQLearningTabularSweepMillionSteps/176_17_6	none	True	-10	False	GridWorld	SUNY	FullObsDiscrete	Individual_Q	1.0	0.05	1000000	6	True	IndivQLearningTabularSweepMillionSteps/176_17_6_decentralized	decentralized	0.05
IndivQLearningTabularSweepMillionSteps/176_17_6	none	True	-10	False	GridWorld	SUNY	FullObsDiscrete	Individual_Q	1.0	0.05	1000000	6	True	IndivQLearningTabularSweepMillionSteps/176_17_6_none	none	0.05
IndivQLearningTabularSweepMillionSteps/177_17_7	none	True	-10	False	GridWorld	SUNY	FullObsDiscrete	Individual_Q	1.0	0.05	1000000	7	True	IndivQLearningTabularSweepMillionSteps/177_17_7_centralized	centralized	0.05
IndivQLearningTabularSweepMillionSteps/177_17_7	none	True	-10	False	GridWorld	SUNY	FullObsDiscrete	Individual_Q	1.0	0.05	1000000	7	True	IndivQLearningTabularSweepMillionSteps/177_17_7_decentralized	decentralized	0.05
IndivQLearningTabularSweepMillionSteps/177_17_7	none	True	-10	False	GridWorld	SUNY	FullObsDiscrete	Individual_Q	1.0	0.05	1000000	7	True	IndivQLearningTabularSweepMillionSteps/177_17_7_none	none	0.05
IndivQLearningTabularSweepMillionSteps/178_17_8	none	True	-10	False	GridWorld	SUNY	FullObsDiscrete	Individual_Q	1.0	0.05	1000000	8	True	IndivQLearningTabularSweepMillionSteps/178_17_8_centralized	centralized	0.05
IndivQLearningTabularSweepMillionSteps/178_17_8	none	True	-10	False	GridWorld	SUNY	FullObsDiscrete	Individual_Q	1.0	0.05	1000000	8	True	IndivQLearningTabularSweepMillionSteps/178_17_8_decentralized	decentralized	0.05
IndivQLearningTabularSweepMillionSteps/178_17_8	none	True	-10	False	GridWorld	SUNY	FullObsDiscrete	Individual_Q	1.0	0.05	1000000	8	True	IndivQLearningTabularSweepMillionSteps/178_17_8_none	none	0.05
IndivQLearningTabularSweepMillionSteps/179_17_9	none	True	-10	False	GridWorld	SUNY	FullObsDiscrete	Individual_Q	1.0	0.05	1000000	9	True	IndivQLearningTabularSweepMillionSteps/179_17_9_centralized	centralized	0.05
IndivQLearningTabularSweepMillionSteps/179_17_9	none	True	-10	False	GridWorld	SUNY	FullObsDiscrete	Individual_Q	1.0	0.05	1000000	9	True	IndivQLearningTabularSweepMillionSteps/179_17_9_decentralized	decentralized	0.05
IndivQLearningTabularSweepMillionSteps/179_17_9	none	True	-10	False	GridWorld	SUNY	FullObsDiscrete	Individual_Q	1.0	0.05	1000000	9	True	IndivQLearningTabularSweepMillionSteps/179_17_9_none	none	0.05
IndivQLearningTabularSweepMillionSteps/180_18_0	centralized	True	-10	True	GridWorld	MIT	FullObsDiscrete	Individual_Q	1.0	0.05	1000000	0	True	IndivQLearningTabularSweepMillionSteps/180_18_0_centralized	centralized	0.05
IndivQLearningTabularSweepMillionSteps/180_18_0	centralized	True	-10	True	GridWorld	MIT	FullObsDiscrete	Individual_Q	1.0	0.05	1000000	0	True	IndivQLearningTabularSweepMillionSteps/180_18_0_decentralized	decentralized	0.05
IndivQLearningTabularSweepMillionSteps/180_18_0	centralized	True	-10	True	GridWorld	MIT	FullObsDiscrete	Individual_Q	1.0	0.05	1000000	0	True	IndivQLearningTabularSweepMillionSteps/180_18_0_none	none	0.05
IndivQLearningTabularSweepMillionSteps/181_18_1	centralized	True	-10	True	GridWorld	MIT	FullObsDiscrete	Individual_Q	1.0	0.05	1000000	1	True	IndivQLearningTabularSweepMillionSteps/181_18_1_centralized	centralized	0.05
IndivQLearningTabularSweepMillionSteps/181_18_1	centralized	True	-10	True	GridWorld	MIT	FullObsDiscrete	Individual_Q	1.0	0.05	1000000	1	True	IndivQLearningTabularSweepMillionSteps/181_18_1_decentralized	decentralized	0.05
IndivQLearningTabularSweepMillionSteps/181_18_1	centralized	True	-10	True	GridWorld	MIT	FullObsDiscrete	Individual_Q	1.0	0.05	1000000	1	True	IndivQLearningTabularSweepMillionSteps/181_18_1_none	none	0.05
IndivQLearningTabularSweepMillionSteps/182_18_2	centralized	True	-10	True	GridWorld	MIT	FullObsDiscrete	Individual_Q	1.0	0.05	1000000	2	True	IndivQLearningTabularSweepMillionSteps/182_18_2_centralized	centralized	0.05
IndivQLearningTabularSweepMillionSteps/182_18_2	centralized	True	-10	True	GridWorld	MIT	FullObsDiscrete	Individual_Q	1.0	0.05	1000000	2	True	IndivQLearningTabularSweepMillionSteps/182_18_2_decentralized	decentralized	0.05
IndivQLearningTabularSweepMillionSteps/182_18_2	centralized	True	-10	True	GridWorld	MIT	FullObsDiscrete	Individual_Q	1.0	0.05	1000000	2	True	IndivQLearningTabularSweepMillionSteps/182_18_2_none	none	0.05
IndivQLearningTabularSweepMillionSteps/183_18_3	centralized	True	-10	True	GridWorld	MIT	FullObsDiscrete	Individual_Q	1.0	0.05	1000000	3	True	IndivQLearningTabularSweepMillionSteps/183_18_3_centralized	centralized	0.05
IndivQLearningTabularSweepMillionSteps/183_18_3	centralized	True	-10	True	GridWorld	MIT	FullObsDiscrete	Individual_Q	1.0	0.05	1000000	3	True	IndivQLearningTabularSweepMillionSteps/183_18_3_decentralized	decentralized	0.05
IndivQLearningTabularSweepMillionSteps/183_18_3	centralized	True	-10	True	GridWorld	MIT	FullObsDiscrete	Individual_Q	1.0	0.05	1000000	3	True	IndivQLearningTabularSweepMillionSteps/183_18_3_none	none	0.05
IndivQLearningTabularSweepMillionSteps/184_18_4	centralized	True	-10	True	GridWorld	MIT	FullObsDiscrete	Individual_Q	1.0	0.05	1000000	4	True	IndivQLearningTabularSweepMillionSteps/184_18_4_centralized	centralized	0.05
IndivQLearningTabularSweepMillionSteps/184_18_4	centralized	True	-10	True	GridWorld	MIT	FullObsDiscrete	Individual_Q	1.0	0.05	1000000	4	True	IndivQLearningTabularSweepMillionSteps/184_18_4_decentralized	decentralized	0.05
IndivQLearningTabularSweepMillionSteps/184_18_4	centralized	True	-10	True	GridWorld	MIT	FullObsDiscrete	Individual_Q	1.0	0.05	1000000	4	True	IndivQLearningTabularSweepMillionSteps/184_18_4_none	none	0.05
IndivQLearningTabularSweepMillionSteps/185_18_5	centralized	True	-10	True	GridWorld	MIT	FullObsDiscrete	Individual_Q	1.0	0.05	1000000	5	True	IndivQLearningTabularSweepMillionSteps/185_18_5_centralized	centralized	0.05
IndivQLearningTabularSweepMillionSteps/185_18_5	centralized	True	-10	True	GridWorld	MIT	FullObsDiscrete	Individual_Q	1.0	0.05	1000000	5	True	IndivQLearningTabularSweepMillionSteps/185_18_5_decentralized	decentralized	0.05
IndivQLearningTabularSweepMillionSteps/185_18_5	centralized	True	-10	True	GridWorld	MIT	FullObsDiscrete	Individual_Q	1.0	0.05	1000000	5	True	IndivQLearningTabularSweepMillionSteps/185_18_5_none	none	0.05
IndivQLearningTabularSweepMillionSteps/186_18_6	centralized	True	-10	True	GridWorld	MIT	FullObsDiscrete	Individual_Q	1.0	0.05	1000000	6	True	IndivQLearningTabularSweepMillionSteps/186_18_6_centralized	centralized	0.05
IndivQLearningTabularSweepMillionSteps/186_18_6	centralized	True	-10	True	GridWorld	MIT	FullObsDiscrete	Individual_Q	1.0	0.05	1000000	6	True	IndivQLearningTabularSweepMillionSteps/186_18_6_decentralized	decentralized	0.05
IndivQLearningTabularSweepMillionSteps/186_18_6	centralized	True	-10	True	GridWorld	MIT	FullObsDiscrete	Individual_Q	1.0	0.05	1000000	6	True	IndivQLearningTabularSweepMillionSteps/186_18_6_none	none	0.05
IndivQLearningTabularSweepMillionSteps/187_18_7	centralized	True	-10	True	GridWorld	MIT	FullObsDiscrete	Individual_Q	1.0	0.05	1000000	7	True	IndivQLearningTabularSweepMillionSteps/187_18_7_centralized	centralized	0.05
IndivQLearningTabularSweepMillionSteps/187_18_7	centralized	True	-10	True	GridWorld	MIT	FullObsDiscrete	Individual_Q	1.0	0.05	1000000	7	True	IndivQLearningTabularSweepMillionSteps/187_18_7_decentralized	decentralized	0.05
IndivQLearningTabularSweepMillionSteps/187_18_7	centralized	True	-10	True	GridWorld	MIT	FullObsDiscrete	Individual_Q	1.0	0.05	1000000	7	True	IndivQLearningTabularSweepMillionSteps/187_18_7_none	none	0.05
IndivQLearningTabularSweepMillionSteps/188_18_8	centralized	True	-10	True	GridWorld	MIT	FullObsDiscrete	Individual_Q	1.0	0.05	1000000	8	True	IndivQLearningTabularSweepMillionSteps/188_18_8_centralized	centralized	0.05
IndivQLearningTabularSweepMillionSteps/188_18_8	centralized	True	-10	True	GridWorld	MIT	FullObsDiscrete	Individual_Q	1.0	0.05	1000000	8	True	IndivQLearningTabularSweepMillionSteps/188_18_8_decentralized	decentralized	0.05
IndivQLearningTabularSweepMillionSteps/188_18_8	centralized	True	-10	True	GridWorld	MIT	FullObsDiscrete	Individual_Q	1.0	0.05	1000000	8	True	IndivQLearningTabularSweepMillionSteps/188_18_8_none	none	0.05
IndivQLearningTabularSweepMillionSteps/189_18_9	centralized	True	-10	True	GridWorld	MIT	FullObsDiscrete	Individual_Q	1.0	0.05	1000000	9	True	IndivQLearningTabularSweepMillionSteps/189_18_9_centralized	centralized	0.05
IndivQLearningTabularSweepMillionSteps/189_18_9	centralized	True	-10	True	GridWorld	MIT	FullObsDiscrete	Individual_Q	1.0	0.05	1000000	9	True	IndivQLearningTabularSweepMillionSteps/189_18_9_decentralized	decentralized	0.05
IndivQLearningTabularSweepMillionSteps/189_18_9	centralized	True	-10	True	GridWorld	MIT	FullObsDiscrete	Individual_Q	1.0	0.05	1000000	9	True	IndivQLearningTabularSweepMillionSteps/189_18_9_none	none	0.05
IndivQLearningTabularSweepMillionSteps/190_19_0	decentralized	True	-10	True	GridWorld	MIT	FullObsDiscrete	Individual_Q	1.0	0.05	1000000	0	True	IndivQLearningTabularSweepMillionSteps/190_19_0_centralized	centralized	0.05
IndivQLearningTabularSweepMillionSteps/190_19_0	decentralized	True	-10	True	GridWorld	MIT	FullObsDiscrete	Individual_Q	1.0	0.05	1000000	0	True	IndivQLearningTabularSweepMillionSteps/190_19_0_decentralized	decentralized	0.05
IndivQLearningTabularSweepMillionSteps/190_19_0	decentralized	True	-10	True	GridWorld	MIT	FullObsDiscrete	Individual_Q	1.0	0.05	1000000	0	True	IndivQLearningTabularSweepMillionSteps/190_19_0_none	none	0.05
IndivQLearningTabularSweepMillionSteps/191_19_1	decentralized	True	-10	True	GridWorld	MIT	FullObsDiscrete	Individual_Q	1.0	0.05	1000000	1	True	IndivQLearningTabularSweepMillionSteps/191_19_1_centralized	centralized	0.05
IndivQLearningTabularSweepMillionSteps/191_19_1	decentralized	True	-10	True	GridWorld	MIT	FullObsDiscrete	Individual_Q	1.0	0.05	1000000	1	True	IndivQLearningTabularSweepMillionSteps/191_19_1_decentralized	decentralized	0.05
IndivQLearningTabularSweepMillionSteps/191_19_1	decentralized	True	-10	True	GridWorld	MIT	FullObsDiscrete	Individual_Q	1.0	0.05	1000000	1	True	IndivQLearningTabularSweepMillionSteps/191_19_1_none	none	0.05
IndivQLearningTabularSweepMillionSteps/192_19_2	decentralized	True	-10	True	GridWorld	MIT	FullObsDiscrete	Individual_Q	1.0	0.05	1000000	2	True	IndivQLearningTabularSweepMillionSteps/192_19_2_centralized	centralized	0.05
IndivQLearningTabularSweepMillionSteps/192_19_2	decentralized	True	-10	True	GridWorld	MIT	FullObsDiscrete	Individual_Q	1.0	0.05	1000000	2	True	IndivQLearningTabularSweepMillionSteps/192_19_2_decentralized	decentralized	0.05
IndivQLearningTabularSweepMillionSteps/192_19_2	decentralized	True	-10	True	GridWorld	MIT	FullObsDiscrete	Individual_Q	1.0	0.05	1000000	2	True	IndivQLearningTabularSweepMillionSteps/192_19_2_none	none	0.05
IndivQLearningTabularSweepMillionSteps/193_19_3	decentralized	True	-10	True	GridWorld	MIT	FullObsDiscrete	Individual_Q	1.0	0.05	1000000	3	True	IndivQLearningTabularSweepMillionSteps/193_19_3_centralized	centralized	0.05
IndivQLearningTabularSweepMillionSteps/193_19_3	decentralized	True	-10	True	GridWorld	MIT	FullObsDiscrete	Individual_Q	1.0	0.05	1000000	3	True	IndivQLearningTabularSweepMillionSteps/193_19_3_decentralized	decentralized	0.05
IndivQLearningTabularSweepMillionSteps/193_19_3	decentralized	True	-10	True	GridWorld	MIT	FullObsDiscrete	Individual_Q	1.0	0.05	1000000	3	True	IndivQLearningTabularSweepMillionSteps/193_19_3_none	none	0.05
IndivQLearningTabularSweepMillionSteps/194_19_4	decentralized	True	-10	True	GridWorld	MIT	FullObsDiscrete	Individual_Q	1.0	0.05	1000000	4	True	IndivQLearningTabularSweepMillionSteps/194_19_4_centralized	centralized	0.05
IndivQLearningTabularSweepMillionSteps/194_19_4	decentralized	True	-10	True	GridWorld	MIT	FullObsDiscrete	Individual_Q	1.0	0.05	1000000	4	True	IndivQLearningTabularSweepMillionSteps/194_19_4_decentralized	decentralized	0.05
IndivQLearningTabularSweepMillionSteps/194_19_4	decentralized	True	-10	True	GridWorld	MIT	FullObsDiscrete	Individual_Q	1.0	0.05	1000000	4	True	IndivQLearningTabularSweepMillionSteps/194_19_4_none	none	0.05
IndivQLearningTabularSweepMillionSteps/195_19_5	decentralized	True	-10	True	GridWorld	MIT	FullObsDiscrete	Individual_Q	1.0	0.05	1000000	5	True	IndivQLearningTabularSweepMillionSteps/195_19_5_centralized	centralized	0.05
IndivQLearningTabularSweepMillionSteps/195_19_5	decentralized	True	-10	True	GridWorld	MIT	FullObsDiscrete	Individual_Q	1.0	0.05	1000000	5	True	IndivQLearningTabularSweepMillionSteps/195_19_5_decentralized	decentralized	0.05
IndivQLearningTabularSweepMillionSteps/195_19_5	decentralized	True	-10	True	GridWorld	MIT	FullObsDiscrete	Individual_Q	1.0	0.05	1000000	5	True	IndivQLearningTabularSweepMillionSteps/195_19_5_none	none	0.05
IndivQLearningTabularSweepMillionSteps/196_19_6	decentralized	True	-10	True	GridWorld	MIT	FullObsDiscrete	Individual_Q	1.0	0.05	1000000	6	True	IndivQLearningTabularSweepMillionSteps/196_19_6_centralized	centralized	0.05
IndivQLearningTabularSweepMillionSteps/196_19_6	decentralized	True	-10	True	GridWorld	MIT	FullObsDiscrete	Individual_Q	1.0	0.05	1000000	6	True	IndivQLearningTabularSweepMillionSteps/196_19_6_decentralized	decentralized	0.05
IndivQLearningTabularSweepMillionSteps/196_19_6	decentralized	True	-10	True	GridWorld	MIT	FullObsDiscrete	Individual_Q	1.0	0.05	1000000	6	True	IndivQLearningTabularSweepMillionSteps/196_19_6_none	none	0.05
IndivQLearningTabularSweepMillionSteps/197_19_7	decentralized	True	-10	True	GridWorld	MIT	FullObsDiscrete	Individual_Q	1.0	0.05	1000000	7	True	IndivQLearningTabularSweepMillionSteps/197_19_7_centralized	centralized	0.05
IndivQLearningTabularSweepMillionSteps/197_19_7	decentralized	True	-10	True	GridWorld	MIT	FullObsDiscrete	Individual_Q	1.0	0.05	1000000	7	True	IndivQLearningTabularSweepMillionSteps/197_19_7_decentralized	decentralized	0.05
IndivQLearningTabularSweepMillionSteps/197_19_7	decentralized	True	-10	True	GridWorld	MIT	FullObsDiscrete	Individual_Q	1.0	0.05	1000000	7	True	IndivQLearningTabularSweepMillionSteps/197_19_7_none	none	0.05
IndivQLearningTabularSweepMillionSteps/198_19_8	decentralized	True	-10	True	GridWorld	MIT	FullObsDiscrete	Individual_Q	1.0	0.05	1000000	8	True	IndivQLearningTabularSweepMillionSteps/198_19_8_centralized	centralized	0.05
IndivQLearningTabularSweepMillionSteps/198_19_8	decentralized	True	-10	True	GridWorld	MIT	FullObsDiscrete	Individual_Q	1.0	0.05	1000000	8	True	IndivQLearningTabularSweepMillionSteps/198_19_8_decentralized	decentralized	0.05
IndivQLearningTabularSweepMillionSteps/198_19_8	decentralized	True	-10	True	GridWorld	MIT	FullObsDiscrete	Individual_Q	1.0	0.05	1000000	8	True	IndivQLearningTabularSweepMillionSteps/198_19_8_none	none	0.05
IndivQLearningTabularSweepMillionSteps/199_19_9	decentralized	True	-10	True	GridWorld	MIT	FullObsDiscrete	Individual_Q	1.0	0.05	1000000	9	True	IndivQLearningTabularSweepMillionSteps/199_19_9_centralized	centralized	0.05
IndivQLearningTabularSweepMillionSteps/199_19_9	decentralized	True	-10	True	GridWorld	MIT	FullObsDiscrete	Individual_Q	1.0	0.05	1000000	9	True	IndivQLearningTabularSweepMillionSteps/199_19_9_decentralized	decentralized	0.05
IndivQLearningTabularSweepMillionSteps/199_19_9	decentralized	True	-10	True	GridWorld	MIT	FullObsDiscrete	Individual_Q	1.0	0.05	1000000	9	True	IndivQLearningTabularSweepMillionSteps/199_19_9_none	none	0.05
IndivQLearningTabularSweepMillionSteps/200_20_0	none	True	-10	True	GridWorld	MIT	FullObsDiscrete	Individual_Q	1.0	0.05	1000000	0	True	IndivQLearningTabularSweepMillionSteps/200_20_0_centralized	centralized	0.05
IndivQLearningTabularSweepMillionSteps/200_20_0	none	True	-10	True	GridWorld	MIT	FullObsDiscrete	Individual_Q	1.0	0.05	1000000	0	True	IndivQLearningTabularSweepMillionSteps/200_20_0_decentralized	decentralized	0.05
IndivQLearningTabularSweepMillionSteps/200_20_0	none	True	-10	True	GridWorld	MIT	FullObsDiscrete	Individual_Q	1.0	0.05	1000000	0	True	IndivQLearningTabularSweepMillionSteps/200_20_0_none	none	0.05
IndivQLearningTabularSweepMillionSteps/201_20_1	none	True	-10	True	GridWorld	MIT	FullObsDiscrete	Individual_Q	1.0	0.05	1000000	1	True	IndivQLearningTabularSweepMillionSteps/201_20_1_centralized	centralized	0.05
IndivQLearningTabularSweepMillionSteps/201_20_1	none	True	-10	True	GridWorld	MIT	FullObsDiscrete	Individual_Q	1.0	0.05	1000000	1	True	IndivQLearningTabularSweepMillionSteps/201_20_1_decentralized	decentralized	0.05
IndivQLearningTabularSweepMillionSteps/201_20_1	none	True	-10	True	GridWorld	MIT	FullObsDiscrete	Individual_Q	1.0	0.05	1000000	1	True	IndivQLearningTabularSweepMillionSteps/201_20_1_none	none	0.05
IndivQLearningTabularSweepMillionSteps/202_20_2	none	True	-10	True	GridWorld	MIT	FullObsDiscrete	Individual_Q	1.0	0.05	1000000	2	True	IndivQLearningTabularSweepMillionSteps/202_20_2_centralized	centralized	0.05
IndivQLearningTabularSweepMillionSteps/202_20_2	none	True	-10	True	GridWorld	MIT	FullObsDiscrete	Individual_Q	1.0	0.05	1000000	2	True	IndivQLearningTabularSweepMillionSteps/202_20_2_decentralized	decentralized	0.05
IndivQLearningTabularSweepMillionSteps/202_20_2	none	True	-10	True	GridWorld	MIT	FullObsDiscrete	Individual_Q	1.0	0.05	1000000	2	True	IndivQLearningTabularSweepMillionSteps/202_20_2_none	none	0.05
IndivQLearningTabularSweepMillionSteps/203_20_3	none	True	-10	True	GridWorld	MIT	FullObsDiscrete	Individual_Q	1.0	0.05	1000000	3	True	IndivQLearningTabularSweepMillionSteps/203_20_3_centralized	centralized	0.05
IndivQLearningTabularSweepMillionSteps/203_20_3	none	True	-10	True	GridWorld	MIT	FullObsDiscrete	Individual_Q	1.0	0.05	1000000	3	True	IndivQLearningTabularSweepMillionSteps/203_20_3_decentralized	decentralized	0.05
IndivQLearningTabularSweepMillionSteps/203_20_3	none	True	-10	True	GridWorld	MIT	FullObsDiscrete	Individual_Q	1.0	0.05	1000000	3	True	IndivQLearningTabularSweepMillionSteps/203_20_3_none	none	0.05
IndivQLearningTabularSweepMillionSteps/204_20_4	none	True	-10	True	GridWorld	MIT	FullObsDiscrete	Individual_Q	1.0	0.05	1000000	4	True	IndivQLearningTabularSweepMillionSteps/204_20_4_centralized	centralized	0.05
IndivQLearningTabularSweepMillionSteps/204_20_4	none	True	-10	True	GridWorld	MIT	FullObsDiscrete	Individual_Q	1.0	0.05	1000000	4	True	IndivQLearningTabularSweepMillionSteps/204_20_4_decentralized	decentralized	0.05
IndivQLearningTabularSweepMillionSteps/204_20_4	none	True	-10	True	GridWorld	MIT	FullObsDiscrete	Individual_Q	1.0	0.05	1000000	4	True	IndivQLearningTabularSweepMillionSteps/204_20_4_none	none	0.05
IndivQLearningTabularSweepMillionSteps/205_20_5	none	True	-10	True	GridWorld	MIT	FullObsDiscrete	Individual_Q	1.0	0.05	1000000	5	True	IndivQLearningTabularSweepMillionSteps/205_20_5_centralized	centralized	0.05
IndivQLearningTabularSweepMillionSteps/205_20_5	none	True	-10	True	GridWorld	MIT	FullObsDiscrete	Individual_Q	1.0	0.05	1000000	5	True	IndivQLearningTabularSweepMillionSteps/205_20_5_decentralized	decentralized	0.05
IndivQLearningTabularSweepMillionSteps/205_20_5	none	True	-10	True	GridWorld	MIT	FullObsDiscrete	Individual_Q	1.0	0.05	1000000	5	True	IndivQLearningTabularSweepMillionSteps/205_20_5_none	none	0.05
IndivQLearningTabularSweepMillionSteps/206_20_6	none	True	-10	True	GridWorld	MIT	FullObsDiscrete	Individual_Q	1.0	0.05	1000000	6	True	IndivQLearningTabularSweepMillionSteps/206_20_6_centralized	centralized	0.05
IndivQLearningTabularSweepMillionSteps/206_20_6	none	True	-10	True	GridWorld	MIT	FullObsDiscrete	Individual_Q	1.0	0.05	1000000	6	True	IndivQLearningTabularSweepMillionSteps/206_20_6_decentralized	decentralized	0.05
IndivQLearningTabularSweepMillionSteps/206_20_6	none	True	-10	True	GridWorld	MIT	FullObsDiscrete	Individual_Q	1.0	0.05	1000000	6	True	IndivQLearningTabularSweepMillionSteps/206_20_6_none	none	0.05
IndivQLearningTabularSweepMillionSteps/207_20_7	none	True	-10	True	GridWorld	MIT	FullObsDiscrete	Individual_Q	1.0	0.05	1000000	7	True	IndivQLearningTabularSweepMillionSteps/207_20_7_centralized	centralized	0.05
IndivQLearningTabularSweepMillionSteps/207_20_7	none	True	-10	True	GridWorld	MIT	FullObsDiscrete	Individual_Q	1.0	0.05	1000000	7	True	IndivQLearningTabularSweepMillionSteps/207_20_7_decentralized	decentralized	0.05
IndivQLearningTabularSweepMillionSteps/207_20_7	none	True	-10	True	GridWorld	MIT	FullObsDiscrete	Individual_Q	1.0	0.05	1000000	7	True	IndivQLearningTabularSweepMillionSteps/207_20_7_none	none	0.05
IndivQLearningTabularSweepMillionSteps/208_20_8	none	True	-10	True	GridWorld	MIT	FullObsDiscrete	Individual_Q	1.0	0.05	1000000	8	True	IndivQLearningTabularSweepMillionSteps/208_20_8_centralized	centralized	0.05
IndivQLearningTabularSweepMillionSteps/208_20_8	none	True	-10	True	GridWorld	MIT	FullObsDiscrete	Individual_Q	1.0	0.05	1000000	8	True	IndivQLearningTabularSweepMillionSteps/208_20_8_decentralized	decentralized	0.05
IndivQLearningTabularSweepMillionSteps/208_20_8	none	True	-10	True	GridWorld	MIT	FullObsDiscrete	Individual_Q	1.0	0.05	1000000	8	True	IndivQLearningTabularSweepMillionSteps/208_20_8_none	none	0.05
IndivQLearningTabularSweepMillionSteps/209_20_9	none	True	-10	True	GridWorld	MIT	FullObsDiscrete	Individual_Q	1.0	0.05	1000000	9	True	IndivQLearningTabularSweepMillionSteps/209_20_9_centralized	centralized	0.05
IndivQLearningTabularSweepMillionSteps/209_20_9	none	True	-10	True	GridWorld	MIT	FullObsDiscrete	Individual_Q	1.0	0.05	1000000	9	True	IndivQLearningTabularSweepMillionSteps/209_20_9_decentralized	decentralized	0.05
IndivQLearningTabularSweepMillionSteps/209_20_9	none	True	-10	True	GridWorld	MIT	FullObsDiscrete	Individual_Q	1.0	0.05	1000000	9	True	IndivQLearningTabularSweepMillionSteps/209_20_9_none	none	0.05
IndivQLearningTabularSweepMillionSteps/210_21_0	centralized	True	-10	False	GridWorld	MIT	FullObsDiscrete	Individual_Q	1.0	0.05	1000000	0	True	IndivQLearningTabularSweepMillionSteps/210_21_0_centralized	centralized	0.05
IndivQLearningTabularSweepMillionSteps/210_21_0	centralized	True	-10	False	GridWorld	MIT	FullObsDiscrete	Individual_Q	1.0	0.05	1000000	0	True	IndivQLearningTabularSweepMillionSteps/210_21_0_decentralized	decentralized	0.05
IndivQLearningTabularSweepMillionSteps/210_21_0	centralized	True	-10	False	GridWorld	MIT	FullObsDiscrete	Individual_Q	1.0	0.05	1000000	0	True	IndivQLearningTabularSweepMillionSteps/210_21_0_none	none	0.05
IndivQLearningTabularSweepMillionSteps/211_21_1	centralized	True	-10	False	GridWorld	MIT	FullObsDiscrete	Individual_Q	1.0	0.05	1000000	1	True	IndivQLearningTabularSweepMillionSteps/211_21_1_centralized	centralized	0.05
IndivQLearningTabularSweepMillionSteps/211_21_1	centralized	True	-10	False	GridWorld	MIT	FullObsDiscrete	Individual_Q	1.0	0.05	1000000	1	True	IndivQLearningTabularSweepMillionSteps/211_21_1_decentralized	decentralized	0.05
IndivQLearningTabularSweepMillionSteps/211_21_1	centralized	True	-10	False	GridWorld	MIT	FullObsDiscrete	Individual_Q	1.0	0.05	1000000	1	True	IndivQLearningTabularSweepMillionSteps/211_21_1_none	none	0.05
IndivQLearningTabularSweepMillionSteps/212_21_2	centralized	True	-10	False	GridWorld	MIT	FullObsDiscrete	Individual_Q	1.0	0.05	1000000	2	True	IndivQLearningTabularSweepMillionSteps/212_21_2_centralized	centralized	0.05
IndivQLearningTabularSweepMillionSteps/212_21_2	centralized	True	-10	False	GridWorld	MIT	FullObsDiscrete	Individual_Q	1.0	0.05	1000000	2	True	IndivQLearningTabularSweepMillionSteps/212_21_2_decentralized	decentralized	0.05
IndivQLearningTabularSweepMillionSteps/212_21_2	centralized	True	-10	False	GridWorld	MIT	FullObsDiscrete	Individual_Q	1.0	0.05	1000000	2	True	IndivQLearningTabularSweepMillionSteps/212_21_2_none	none	0.05
IndivQLearningTabularSweepMillionSteps/213_21_3	centralized	True	-10	False	GridWorld	MIT	FullObsDiscrete	Individual_Q	1.0	0.05	1000000	3	True	IndivQLearningTabularSweepMillionSteps/213_21_3_centralized	centralized	0.05
IndivQLearningTabularSweepMillionSteps/213_21_3	centralized	True	-10	False	GridWorld	MIT	FullObsDiscrete	Individual_Q	1.0	0.05	1000000	3	True	IndivQLearningTabularSweepMillionSteps/213_21_3_decentralized	decentralized	0.05
IndivQLearningTabularSweepMillionSteps/213_21_3	centralized	True	-10	False	GridWorld	MIT	FullObsDiscrete	Individual_Q	1.0	0.05	1000000	3	True	IndivQLearningTabularSweepMillionSteps/213_21_3_none	none	0.05
IndivQLearningTabularSweepMillionSteps/214_21_4	centralized	True	-10	False	GridWorld	MIT	FullObsDiscrete	Individual_Q	1.0	0.05	1000000	4	True	IndivQLearningTabularSweepMillionSteps/214_21_4_centralized	centralized	0.05
IndivQLearningTabularSweepMillionSteps/214_21_4	centralized	True	-10	False	GridWorld	MIT	FullObsDiscrete	Individual_Q	1.0	0.05	1000000	4	True	IndivQLearningTabularSweepMillionSteps/214_21_4_decentralized	decentralized	0.05
IndivQLearningTabularSweepMillionSteps/214_21_4	centralized	True	-10	False	GridWorld	MIT	FullObsDiscrete	Individual_Q	1.0	0.05	1000000	4	True	IndivQLearningTabularSweepMillionSteps/214_21_4_none	none	0.05
IndivQLearningTabularSweepMillionSteps/215_21_5	centralized	True	-10	False	GridWorld	MIT	FullObsDiscrete	Individual_Q	1.0	0.05	1000000	5	True	IndivQLearningTabularSweepMillionSteps/215_21_5_centralized	centralized	0.05
IndivQLearningTabularSweepMillionSteps/215_21_5	centralized	True	-10	False	GridWorld	MIT	FullObsDiscrete	Individual_Q	1.0	0.05	1000000	5	True	IndivQLearningTabularSweepMillionSteps/215_21_5_decentralized	decentralized	0.05
IndivQLearningTabularSweepMillionSteps/215_21_5	centralized	True	-10	False	GridWorld	MIT	FullObsDiscrete	Individual_Q	1.0	0.05	1000000	5	True	IndivQLearningTabularSweepMillionSteps/215_21_5_none	none	0.05
IndivQLearningTabularSweepMillionSteps/216_21_6	centralized	True	-10	False	GridWorld	MIT	FullObsDiscrete	Individual_Q	1.0	0.05	1000000	6	True	IndivQLearningTabularSweepMillionSteps/216_21_6_centralized	centralized	0.05
IndivQLearningTabularSweepMillionSteps/216_21_6	centralized	True	-10	False	GridWorld	MIT	FullObsDiscrete	Individual_Q	1.0	0.05	1000000	6	True	IndivQLearningTabularSweepMillionSteps/216_21_6_decentralized	decentralized	0.05
IndivQLearningTabularSweepMillionSteps/216_21_6	centralized	True	-10	False	GridWorld	MIT	FullObsDiscrete	Individual_Q	1.0	0.05	1000000	6	True	IndivQLearningTabularSweepMillionSteps/216_21_6_none	none	0.05
IndivQLearningTabularSweepMillionSteps/217_21_7	centralized	True	-10	False	GridWorld	MIT	FullObsDiscrete	Individual_Q	1.0	0.05	1000000	7	True	IndivQLearningTabularSweepMillionSteps/217_21_7_centralized	centralized	0.05
IndivQLearningTabularSweepMillionSteps/217_21_7	centralized	True	-10	False	GridWorld	MIT	FullObsDiscrete	Individual_Q	1.0	0.05	1000000	7	True	IndivQLearningTabularSweepMillionSteps/217_21_7_decentralized	decentralized	0.05
IndivQLearningTabularSweepMillionSteps/217_21_7	centralized	True	-10	False	GridWorld	MIT	FullObsDiscrete	Individual_Q	1.0	0.05	1000000	7	True	IndivQLearningTabularSweepMillionSteps/217_21_7_none	none	0.05
IndivQLearningTabularSweepMillionSteps/218_21_8	centralized	True	-10	False	GridWorld	MIT	FullObsDiscrete	Individual_Q	1.0	0.05	1000000	8	True	IndivQLearningTabularSweepMillionSteps/218_21_8_centralized	centralized	0.05
IndivQLearningTabularSweepMillionSteps/218_21_8	centralized	True	-10	False	GridWorld	MIT	FullObsDiscrete	Individual_Q	1.0	0.05	1000000	8	True	IndivQLearningTabularSweepMillionSteps/218_21_8_decentralized	decentralized	0.05
IndivQLearningTabularSweepMillionSteps/218_21_8	centralized	True	-10	False	GridWorld	MIT	FullObsDiscrete	Individual_Q	1.0	0.05	1000000	8	True	IndivQLearningTabularSweepMillionSteps/218_21_8_none	none	0.05
IndivQLearningTabularSweepMillionSteps/219_21_9	centralized	True	-10	False	GridWorld	MIT	FullObsDiscrete	Individual_Q	1.0	0.05	1000000	9	True	IndivQLearningTabularSweepMillionSteps/219_21_9_centralized	centralized	0.05
IndivQLearningTabularSweepMillionSteps/219_21_9	centralized	True	-10	False	GridWorld	MIT	FullObsDiscrete	Individual_Q	1.0	0.05	1000000	9	True	IndivQLearningTabularSweepMillionSteps/219_21_9_decentralized	decentralized	0.05
IndivQLearningTabularSweepMillionSteps/219_21_9	centralized	True	-10	False	GridWorld	MIT	FullObsDiscrete	Individual_Q	1.0	0.05	1000000	9	True	IndivQLearningTabularSweepMillionSteps/219_21_9_none	none	0.05
IndivQLearningTabularSweepMillionSteps/220_22_0	decentralized	True	-10	False	GridWorld	MIT	FullObsDiscrete	Individual_Q	1.0	0.05	1000000	0	True	IndivQLearningTabularSweepMillionSteps/220_22_0_centralized	centralized	0.05
IndivQLearningTabularSweepMillionSteps/220_22_0	decentralized	True	-10	False	GridWorld	MIT	FullObsDiscrete	Individual_Q	1.0	0.05	1000000	0	True	IndivQLearningTabularSweepMillionSteps/220_22_0_decentralized	decentralized	0.05
IndivQLearningTabularSweepMillionSteps/220_22_0	decentralized	True	-10	False	GridWorld	MIT	FullObsDiscrete	Individual_Q	1.0	0.05	1000000	0	True	IndivQLearningTabularSweepMillionSteps/220_22_0_none	none	0.05
IndivQLearningTabularSweepMillionSteps/221_22_1	decentralized	True	-10	False	GridWorld	MIT	FullObsDiscrete	Individual_Q	1.0	0.05	1000000	1	True	IndivQLearningTabularSweepMillionSteps/221_22_1_centralized	centralized	0.05
IndivQLearningTabularSweepMillionSteps/221_22_1	decentralized	True	-10	False	GridWorld	MIT	FullObsDiscrete	Individual_Q	1.0	0.05	1000000	1	True	IndivQLearningTabularSweepMillionSteps/221_22_1_decentralized	decentralized	0.05
IndivQLearningTabularSweepMillionSteps/221_22_1	decentralized	True	-10	False	GridWorld	MIT	FullObsDiscrete	Individual_Q	1.0	0.05	1000000	1	True	IndivQLearningTabularSweepMillionSteps/221_22_1_none	none	0.05
IndivQLearningTabularSweepMillionSteps/222_22_2	decentralized	True	-10	False	GridWorld	MIT	FullObsDiscrete	Individual_Q	1.0	0.05	1000000	2	True	IndivQLearningTabularSweepMillionSteps/222_22_2_centralized	centralized	0.05
IndivQLearningTabularSweepMillionSteps/222_22_2	decentralized	True	-10	False	GridWorld	MIT	FullObsDiscrete	Individual_Q	1.0	0.05	1000000	2	True	IndivQLearningTabularSweepMillionSteps/222_22_2_decentralized	decentralized	0.05
IndivQLearningTabularSweepMillionSteps/222_22_2	decentralized	True	-10	False	GridWorld	MIT	FullObsDiscrete	Individual_Q	1.0	0.05	1000000	2	True	IndivQLearningTabularSweepMillionSteps/222_22_2_none	none	0.05
IndivQLearningTabularSweepMillionSteps/223_22_3	decentralized	True	-10	False	GridWorld	MIT	FullObsDiscrete	Individual_Q	1.0	0.05	1000000	3	True	IndivQLearningTabularSweepMillionSteps/223_22_3_centralized	centralized	0.05
IndivQLearningTabularSweepMillionSteps/223_22_3	decentralized	True	-10	False	GridWorld	MIT	FullObsDiscrete	Individual_Q	1.0	0.05	1000000	3	True	IndivQLearningTabularSweepMillionSteps/223_22_3_decentralized	decentralized	0.05
IndivQLearningTabularSweepMillionSteps/223_22_3	decentralized	True	-10	False	GridWorld	MIT	FullObsDiscrete	Individual_Q	1.0	0.05	1000000	3	True	IndivQLearningTabularSweepMillionSteps/223_22_3_none	none	0.05
IndivQLearningTabularSweepMillionSteps/224_22_4	decentralized	True	-10	False	GridWorld	MIT	FullObsDiscrete	Individual_Q	1.0	0.05	1000000	4	True	IndivQLearningTabularSweepMillionSteps/224_22_4_centralized	centralized	0.05
IndivQLearningTabularSweepMillionSteps/224_22_4	decentralized	True	-10	False	GridWorld	MIT	FullObsDiscrete	Individual_Q	1.0	0.05	1000000	4	True	IndivQLearningTabularSweepMillionSteps/224_22_4_decentralized	decentralized	0.05
IndivQLearningTabularSweepMillionSteps/224_22_4	decentralized	True	-10	False	GridWorld	MIT	FullObsDiscrete	Individual_Q	1.0	0.05	1000000	4	True	IndivQLearningTabularSweepMillionSteps/224_22_4_none	none	0.05
IndivQLearningTabularSweepMillionSteps/225_22_5	decentralized	True	-10	False	GridWorld	MIT	FullObsDiscrete	Individual_Q	1.0	0.05	1000000	5	True	IndivQLearningTabularSweepMillionSteps/225_22_5_centralized	centralized	0.05
IndivQLearningTabularSweepMillionSteps/225_22_5	decentralized	True	-10	False	GridWorld	MIT	FullObsDiscrete	Individual_Q	1.0	0.05	1000000	5	True	IndivQLearningTabularSweepMillionSteps/225_22_5_decentralized	decentralized	0.05
IndivQLearningTabularSweepMillionSteps/225_22_5	decentralized	True	-10	False	GridWorld	MIT	FullObsDiscrete	Individual_Q	1.0	0.05	1000000	5	True	IndivQLearningTabularSweepMillionSteps/225_22_5_none	none	0.05
IndivQLearningTabularSweepMillionSteps/226_22_6	decentralized	True	-10	False	GridWorld	MIT	FullObsDiscrete	Individual_Q	1.0	0.05	1000000	6	True	IndivQLearningTabularSweepMillionSteps/226_22_6_centralized	centralized	0.05
IndivQLearningTabularSweepMillionSteps/226_22_6	decentralized	True	-10	False	GridWorld	MIT	FullObsDiscrete	Individual_Q	1.0	0.05	1000000	6	True	IndivQLearningTabularSweepMillionSteps/226_22_6_decentralized	decentralized	0.05
IndivQLearningTabularSweepMillionSteps/226_22_6	decentralized	True	-10	False	GridWorld	MIT	FullObsDiscrete	Individual_Q	1.0	0.05	1000000	6	True	IndivQLearningTabularSweepMillionSteps/226_22_6_none	none	0.05
IndivQLearningTabularSweepMillionSteps/227_22_7	decentralized	True	-10	False	GridWorld	MIT	FullObsDiscrete	Individual_Q	1.0	0.05	1000000	7	True	IndivQLearningTabularSweepMillionSteps/227_22_7_centralized	centralized	0.05
IndivQLearningTabularSweepMillionSteps/227_22_7	decentralized	True	-10	False	GridWorld	MIT	FullObsDiscrete	Individual_Q	1.0	0.05	1000000	7	True	IndivQLearningTabularSweepMillionSteps/227_22_7_decentralized	decentralized	0.05
IndivQLearningTabularSweepMillionSteps/227_22_7	decentralized	True	-10	False	GridWorld	MIT	FullObsDiscrete	Individual_Q	1.0	0.05	1000000	7	True	IndivQLearningTabularSweepMillionSteps/227_22_7_none	none	0.05
IndivQLearningTabularSweepMillionSteps/228_22_8	decentralized	True	-10	False	GridWorld	MIT	FullObsDiscrete	Individual_Q	1.0	0.05	1000000	8	True	IndivQLearningTabularSweepMillionSteps/228_22_8_centralized	centralized	0.05
IndivQLearningTabularSweepMillionSteps/228_22_8	decentralized	True	-10	False	GridWorld	MIT	FullObsDiscrete	Individual_Q	1.0	0.05	1000000	8	True	IndivQLearningTabularSweepMillionSteps/228_22_8_decentralized	decentralized	0.05
IndivQLearningTabularSweepMillionSteps/228_22_8	decentralized	True	-10	False	GridWorld	MIT	FullObsDiscrete	Individual_Q	1.0	0.05	1000000	8	True	IndivQLearningTabularSweepMillionSteps/228_22_8_none	none	0.05
IndivQLearningTabularSweepMillionSteps/229_22_9	decentralized	True	-10	False	GridWorld	MIT	FullObsDiscrete	Individual_Q	1.0	0.05	1000000	9	True	IndivQLearningTabularSweepMillionSteps/229_22_9_centralized	centralized	0.05
IndivQLearningTabularSweepMillionSteps/229_22_9	decentralized	True	-10	False	GridWorld	MIT	FullObsDiscrete	Individual_Q	1.0	0.05	1000000	9	True	IndivQLearningTabularSweepMillionSteps/229_22_9_decentralized	decentralized	0.05
IndivQLearningTabularSweepMillionSteps/229_22_9	decentralized	True	-10	False	GridWorld	MIT	FullObsDiscrete	Individual_Q	1.0	0.05	1000000	9	True	IndivQLearningTabularSweepMillionSteps/229_22_9_none	none	0.05
IndivQLearningTabularSweepMillionSteps/230_23_0	none	True	-10	False	GridWorld	MIT	FullObsDiscrete	Individual_Q	1.0	0.05	1000000	0	True	IndivQLearningTabularSweepMillionSteps/230_23_0_centralized	centralized	0.05
IndivQLearningTabularSweepMillionSteps/230_23_0	none	True	-10	False	GridWorld	MIT	FullObsDiscrete	Individual_Q	1.0	0.05	1000000	0	True	IndivQLearningTabularSweepMillionSteps/230_23_0_decentralized	decentralized	0.05
IndivQLearningTabularSweepMillionSteps/230_23_0	none	True	-10	False	GridWorld	MIT	FullObsDiscrete	Individual_Q	1.0	0.05	1000000	0	True	IndivQLearningTabularSweepMillionSteps/230_23_0_none	none	0.05
IndivQLearningTabularSweepMillionSteps/231_23_1	none	True	-10	False	GridWorld	MIT	FullObsDiscrete	Individual_Q	1.0	0.05	1000000	1	True	IndivQLearningTabularSweepMillionSteps/231_23_1_centralized	centralized	0.05
IndivQLearningTabularSweepMillionSteps/231_23_1	none	True	-10	False	GridWorld	MIT	FullObsDiscrete	Individual_Q	1.0	0.05	1000000	1	True	IndivQLearningTabularSweepMillionSteps/231_23_1_decentralized	decentralized	0.05
IndivQLearningTabularSweepMillionSteps/231_23_1	none	True	-10	False	GridWorld	MIT	FullObsDiscrete	Individual_Q	1.0	0.05	1000000	1	True	IndivQLearningTabularSweepMillionSteps/231_23_1_none	none	0.05
IndivQLearningTabularSweepMillionSteps/232_23_2	none	True	-10	False	GridWorld	MIT	FullObsDiscrete	Individual_Q	1.0	0.05	1000000	2	True	IndivQLearningTabularSweepMillionSteps/232_23_2_centralized	centralized	0.05
IndivQLearningTabularSweepMillionSteps/232_23_2	none	True	-10	False	GridWorld	MIT	FullObsDiscrete	Individual_Q	1.0	0.05	1000000	2	True	IndivQLearningTabularSweepMillionSteps/232_23_2_decentralized	decentralized	0.05
IndivQLearningTabularSweepMillionSteps/232_23_2	none	True	-10	False	GridWorld	MIT	FullObsDiscrete	Individual_Q	1.0	0.05	1000000	2	True	IndivQLearningTabularSweepMillionSteps/232_23_2_none	none	0.05
IndivQLearningTabularSweepMillionSteps/233_23_3	none	True	-10	False	GridWorld	MIT	FullObsDiscrete	Individual_Q	1.0	0.05	1000000	3	True	IndivQLearningTabularSweepMillionSteps/233_23_3_centralized	centralized	0.05
IndivQLearningTabularSweepMillionSteps/233_23_3	none	True	-10	False	GridWorld	MIT	FullObsDiscrete	Individual_Q	1.0	0.05	1000000	3	True	IndivQLearningTabularSweepMillionSteps/233_23_3_decentralized	decentralized	0.05
IndivQLearningTabularSweepMillionSteps/233_23_3	none	True	-10	False	GridWorld	MIT	FullObsDiscrete	Individual_Q	1.0	0.05	1000000	3	True	IndivQLearningTabularSweepMillionSteps/233_23_3_none	none	0.05
IndivQLearningTabularSweepMillionSteps/234_23_4	none	True	-10	False	GridWorld	MIT	FullObsDiscrete	Individual_Q	1.0	0.05	1000000	4	True	IndivQLearningTabularSweepMillionSteps/234_23_4_centralized	centralized	0.05
IndivQLearningTabularSweepMillionSteps/234_23_4	none	True	-10	False	GridWorld	MIT	FullObsDiscrete	Individual_Q	1.0	0.05	1000000	4	True	IndivQLearningTabularSweepMillionSteps/234_23_4_decentralized	decentralized	0.05
IndivQLearningTabularSweepMillionSteps/234_23_4	none	True	-10	False	GridWorld	MIT	FullObsDiscrete	Individual_Q	1.0	0.05	1000000	4	True	IndivQLearningTabularSweepMillionSteps/234_23_4_none	none	0.05
IndivQLearningTabularSweepMillionSteps/235_23_5	none	True	-10	False	GridWorld	MIT	FullObsDiscrete	Individual_Q	1.0	0.05	1000000	5	True	IndivQLearningTabularSweepMillionSteps/235_23_5_centralized	centralized	0.05
IndivQLearningTabularSweepMillionSteps/235_23_5	none	True	-10	False	GridWorld	MIT	FullObsDiscrete	Individual_Q	1.0	0.05	1000000	5	True	IndivQLearningTabularSweepMillionSteps/235_23_5_decentralized	decentralized	0.05
IndivQLearningTabularSweepMillionSteps/235_23_5	none	True	-10	False	GridWorld	MIT	FullObsDiscrete	Individual_Q	1.0	0.05	1000000	5	True	IndivQLearningTabularSweepMillionSteps/235_23_5_none	none	0.05
IndivQLearningTabularSweepMillionSteps/236_23_6	none	True	-10	False	GridWorld	MIT	FullObsDiscrete	Individual_Q	1.0	0.05	1000000	6	True	IndivQLearningTabularSweepMillionSteps/236_23_6_centralized	centralized	0.05
IndivQLearningTabularSweepMillionSteps/236_23_6	none	True	-10	False	GridWorld	MIT	FullObsDiscrete	Individual_Q	1.0	0.05	1000000	6	True	IndivQLearningTabularSweepMillionSteps/236_23_6_decentralized	decentralized	0.05
IndivQLearningTabularSweepMillionSteps/236_23_6	none	True	-10	False	GridWorld	MIT	FullObsDiscrete	Individual_Q	1.0	0.05	1000000	6	True	IndivQLearningTabularSweepMillionSteps/236_23_6_none	none	0.05
IndivQLearningTabularSweepMillionSteps/237_23_7	none	True	-10	False	GridWorld	MIT	FullObsDiscrete	Individual_Q	1.0	0.05	1000000	7	True	IndivQLearningTabularSweepMillionSteps/237_23_7_centralized	centralized	0.05
IndivQLearningTabularSweepMillionSteps/237_23_7	none	True	-10	False	GridWorld	MIT	FullObsDiscrete	Individual_Q	1.0	0.05	1000000	7	True	IndivQLearningTabularSweepMillionSteps/237_23_7_decentralized	decentralized	0.05
IndivQLearningTabularSweepMillionSteps/237_23_7	none	True	-10	False	GridWorld	MIT	FullObsDiscrete	Individual_Q	1.0	0.05	1000000	7	True	IndivQLearningTabularSweepMillionSteps/237_23_7_none	none	0.05
IndivQLearningTabularSweepMillionSteps/238_23_8	none	True	-10	False	GridWorld	MIT	FullObsDiscrete	Individual_Q	1.0	0.05	1000000	8	True	IndivQLearningTabularSweepMillionSteps/238_23_8_centralized	centralized	0.05
IndivQLearningTabularSweepMillionSteps/238_23_8	none	True	-10	False	GridWorld	MIT	FullObsDiscrete	Individual_Q	1.0	0.05	1000000	8	True	IndivQLearningTabularSweepMillionSteps/238_23_8_decentralized	decentralized	0.05
IndivQLearningTabularSweepMillionSteps/238_23_8	none	True	-10	False	GridWorld	MIT	FullObsDiscrete	Individual_Q	1.0	0.05	1000000	8	True	IndivQLearningTabularSweepMillionSteps/238_23_8_none	none	0.05
IndivQLearningTabularSweepMillionSteps/239_23_9	none	True	-10	False	GridWorld	MIT	FullObsDiscrete	Individual_Q	1.0	0.05	1000000	9	True	IndivQLearningTabularSweepMillionSteps/239_23_9_centralized	centralized	0.05
IndivQLearningTabularSweepMillionSteps/239_23_9	none	True	-10	False	GridWorld	MIT	FullObsDiscrete	Individual_Q	1.0	0.05	1000000	9	True	IndivQLearningTabularSweepMillionSteps/239_23_9_decentralized	decentralized	0.05
IndivQLearningTabularSweepMillionSteps/239_23_9	none	True	-10	False	GridWorld	MIT	FullObsDiscrete	Individual_Q	1.0	0.05	1000000	9	True	IndivQLearningTabularSweepMillionSteps/239_23_9_none	none	0.05
