# Supplementary material
Source: ML conference proceedings conference paper supplement (https://proceedings.neurips.cc/paper_files/paper/2022/hash/57444e14ecd9e2c8f603b4f012ce3811-Abstract.html)
Supplement: Supplementary file 1 [file 57444e14ecd9e2c8f603b4f012ce3811-Supplemental-Conference.zip › 3410_shield_decentralization_for_sa-Supplementary Material/parallel_configs/IndivQLearningTabularSweepMillionStepsTrain.csv]

run_name	shield	punish_unsafe_orig_action	punish_unsafe_orig_action_modifier	randomize_starts	map_type	grid_world_map_name	grid_world_obs_type	learner_type	learner_anneal_eps_start	learner_anneal_eps_finish	max_total_steps	seed	skip_evaluation
IndivQLearningTabularSweepMillionSteps/0_0_0	centralized	True	-10	True	GridWorld	Pentagon	FullObsDiscrete	Individual_Q	1.0	0.05	1000000	0	True
IndivQLearningTabularSweepMillionSteps/1_0_1	centralized	True	-10	True	GridWorld	Pentagon	FullObsDiscrete	Individual_Q	1.0	0.05	1000000	1	True
IndivQLearningTabularSweepMillionSteps/2_0_2	centralized	True	-10	True	GridWorld	Pentagon	FullObsDiscrete	Individual_Q	1.0	0.05	1000000	2	True
IndivQLearningTabularSweepMillionSteps/3_0_3	centralized	True	-10	True	GridWorld	Pentagon	FullObsDiscrete	Individual_Q	1.0	0.05	1000000	3	True
IndivQLearningTabularSweepMillionSteps/4_0_4	centralized	True	-10	True	GridWorld	Pentagon	FullObsDiscrete	Individual_Q	1.0	0.05	1000000	4	True
IndivQLearningTabularSweepMillionSteps/5_0_5	centralized	True	-10	True	GridWorld	Pentagon	FullObsDiscrete	Individual_Q	1.0	0.05	1000000	5	True
IndivQLearningTabularSweepMillionSteps/6_0_6	centralized	True	-10	True	GridWorld	Pentagon	FullObsDiscrete	Individual_Q	1.0	0.05	1000000	6	True
IndivQLearningTabularSweepMillionSteps/7_0_7	centralized	True	-10	True	GridWorld	Pentagon	FullObsDiscrete	Individual_Q	1.0	0.05	1000000	7	True
IndivQLearningTabularSweepMillionSteps/8_0_8	centralized	True	-10	True	GridWorld	Pentagon	FullObsDiscrete	Individual_Q	1.0	0.05	1000000	8	True
IndivQLearningTabularSweepMillionSteps/9_0_9	centralized	True	-10	True	GridWorld	Pentagon	FullObsDiscrete	Individual_Q	1.0	0.05	1000000	9	True
IndivQLearningTabularSweepMillionSteps/10_1_0	decentralized	True	-10	True	GridWorld	Pentagon	FullObsDiscrete	Individual_Q	1.0	0.05	1000000	0	True
IndivQLearningTabularSweepMillionSteps/11_1_1	decentralized	True	-10	True	GridWorld	Pentagon	FullObsDiscrete	Individual_Q	1.0	0.05	1000000	1	True
IndivQLearningTabularSweepMillionSteps/12_1_2	decentralized	True	-10	True	GridWorld	Pentagon	FullObsDiscrete	Individual_Q	1.0	0.05	1000000	2	True
IndivQLearningTabularSweepMillionSteps/13_1_3	decentralized	True	-10	True	GridWorld	Pentagon	FullObsDiscrete	Individual_Q	1.0	0.05	1000000	3	True
IndivQLearningTabularSweepMillionSteps/14_1_4	decentralized	True	-10	True	GridWorld	Pentagon	FullObsDiscrete	Individual_Q	1.0	0.05	1000000	4	True
IndivQLearningTabularSweepMillionSteps/15_1_5	decentralized	True	-10	True	GridWorld	Pentagon	FullObsDiscrete	Individual_Q	1.0	0.05	1000000	5	True
IndivQLearningTabularSweepMillionSteps/16_1_6	decentralized	True	-10	True	GridWorld	Pentagon	FullObsDiscrete	Individual_Q	1.0	0.05	1000000	6	True
IndivQLearningTabularSweepMillionSteps/17_1_7	decentralized	True	-10	True	GridWorld	Pentagon	FullObsDiscrete	Individual_Q	1.0	0.05	1000000	7	True
IndivQLearningTabularSweepMillionSteps/18_1_8	decentralized	True	-10	True	GridWorld	Pentagon	FullObsDiscrete	Individual_Q	1.0	0.05	1000000	8	True
IndivQLearningTabularSweepMillionSteps/19_1_9	decentralized	True	-10	True	GridWorld	Pentagon	FullObsDiscrete	Individual_Q	1.0	0.05	1000000	9	True
IndivQLearningTabularSweepMillionSteps/20_2_0	none	True	-10	True	GridWorld	Pentagon	FullObsDiscrete	Individual_Q	1.0	0.05	1000000	0	True
IndivQLearningTabularSweepMillionSteps/21_2_1	none	True	-10	True	GridWorld	Pentagon	FullObsDiscrete	Individual_Q	1.0	0.05	1000000	1	True
IndivQLearningTabularSweepMillionSteps/22_2_2	none	True	-10	True	GridWorld	Pentagon	FullObsDiscrete	Individual_Q	1.0	0.05	1000000	2	True
IndivQLearningTabularSweepMillionSteps/23_2_3	none	True	-10	True	GridWorld	Pentagon	FullObsDiscrete	Individual_Q	1.0	0.05	1000000	3	True
IndivQLearningTabularSweepMillionSteps/24_2_4	none	True	-10	True	GridWorld	Pentagon	FullObsDiscrete	Individual_Q	1.0	0.05	1000000	4	True
IndivQLearningTabularSweepMillionSteps/25_2_5	none	True	-10	True	GridWorld	Pentagon	FullObsDiscrete	Individual_Q	1.0	0.05	1000000	5	True
IndivQLearningTabularSweepMillionSteps/26_2_6	none	True	-10	True	GridWorld	Pentagon	FullObsDiscrete	Individual_Q	1.0	0.05	1000000	6	True
IndivQLearningTabularSweepMillionSteps/27_2_7	none	True	-10	True	GridWorld	Pentagon	FullObsDiscrete	Individual_Q	1.0	0.05	1000000	7	True
IndivQLearningTabularSweepMillionSteps/28_2_8	none	True	-10	True	GridWorld	Pentagon	FullObsDiscrete	Individual_Q	1.0	0.05	1000000	8	True
IndivQLearningTabularSweepMillionSteps/29_2_9	none	True	-10	True	GridWorld	Pentagon	FullObsDiscrete	Individual_Q	1.0	0.05	1000000	9	True
IndivQLearningTabularSweepMillionSteps/30_3_0	centralized	True	-10	False	GridWorld	Pentagon	FullObsDiscrete	Individual_Q	1.0	0.05	1000000	0	True
IndivQLearningTabularSweepMillionSteps/31_3_1	centralized	True	-10	False	GridWorld	Pentagon	FullObsDiscrete	Individual_Q	1.0	0.05	1000000	1	True
IndivQLearningTabularSweepMillionSteps/32_3_2	centralized	True	-10	False	GridWorld	Pentagon	FullObsDiscrete	Individual_Q	1.0	0.05	1000000	2	True
IndivQLearningTabularSweepMillionSteps/33_3_3	centralized	True	-10	False	GridWorld	Pentagon	FullObsDiscrete	Individual_Q	1.0	0.05	1000000	3	True
IndivQLearningTabularSweepMillionSteps/34_3_4	centralized	True	-10	False	GridWorld	Pentagon	FullObsDiscrete	Individual_Q	1.0	0.05	1000000	4	True
IndivQLearningTabularSweepMillionSteps/35_3_5	centralized	True	-10	False	GridWorld	Pentagon	FullObsDiscrete	Individual_Q	1.0	0.05	1000000	5	True
IndivQLearningTabularSweepMillionSteps/36_3_6	centralized	True	-10	False	GridWorld	Pentagon	FullObsDiscrete	Individual_Q	1.0	0.05	1000000	6	True
IndivQLearningTabularSweepMillionSteps/37_3_7	centralized	True	-10	False	GridWorld	Pentagon	FullObsDiscrete	Individual_Q	1.0	0.05	1000000	7	True
IndivQLearningTabularSweepMillionSteps/38_3_8	centralized	True	-10	False	GridWorld	Pentagon	FullObsDiscrete	Individual_Q	1.0	0.05	1000000	8	True
IndivQLearningTabularSweepMillionSteps/39_3_9	centralized	True	-10	False	GridWorld	Pentagon	FullObsDiscrete	Individual_Q	1.0	0.05	1000000	9	True
IndivQLearningTabularSweepMillionSteps/40_4_0	decentralized	True	-10	False	GridWorld	Pentagon	FullObsDiscrete	Individual_Q	1.0	0.05	1000000	0	True
IndivQLearningTabularSweepMillionSteps/41_4_1	decentralized	True	-10	False	GridWorld	Pentagon	FullObsDiscrete	Individual_Q	1.0	0.05	1000000	1	True
IndivQLearningTabularSweepMillionSteps/42_4_2	decentralized	True	-10	False	GridWorld	Pentagon	FullObsDiscrete	Individual_Q	1.0	0.05	1000000	2	True
IndivQLearningTabularSweepMillionSteps/43_4_3	decentralized	True	-10	False	GridWorld	Pentagon	FullObsDiscrete	Individual_Q	1.0	0.05	1000000	3	True
IndivQLearningTabularSweepMillionSteps/44_4_4	decentralized	True	-10	False	GridWorld	Pentagon	FullObsDiscrete	Individual_Q	1.0	0.05	1000000	4	True
IndivQLearningTabularSweepMillionSteps/45_4_5	decentralized	True	-10	False	GridWorld	Pentagon	FullObsDiscrete	Individual_Q	1.0	0.05	1000000	5	True
IndivQLearningTabularSweepMillionSteps/46_4_6	decentralized	True	-10	False	GridWorld	Pentagon	FullObsDiscrete	Individual_Q	1.0	0.05	1000000	6	True
IndivQLearningTabularSweepMillionSteps/47_4_7	decentralized	True	-10	False	GridWorld	Pentagon	FullObsDiscrete	Individual_Q	1.0	0.05	1000000	7	True
IndivQLearningTabularSweepMillionSteps/48_4_8	decentralized	True	-10	False	GridWorld	Pentagon	FullObsDiscrete	Individual_Q	1.0	0.05	1000000	8	True
IndivQLearningTabularSweepMillionSteps/49_4_9	decentralized	True	-10	False	GridWorld	Pentagon	FullObsDiscrete	Individual_Q	1.0	0.05	1000000	9	True
IndivQLearningTabularSweepMillionSteps/50_5_0	none	True	-10	False	GridWorld	Pentagon	FullObsDiscrete	Individual_Q	1.0	0.05	1000000	0	True
IndivQLearningTabularSweepMillionSteps/51_5_1	none	True	-10	False	GridWorld	Pentagon	FullObsDiscrete	Individual_Q	1.0	0.05	1000000	1	True
IndivQLearningTabularSweepMillionSteps/52_5_2	none	True	-10	False	GridWorld	Pentagon	FullObsDiscrete	Individual_Q	1.0	0.05	1000000	2	True
IndivQLearningTabularSweepMillionSteps/53_5_3	none	True	-10	False	GridWorld	Pentagon	FullObsDiscrete	Individual_Q	1.0	0.05	1000000	3	True
IndivQLearningTabularSweepMillionSteps/54_5_4	none	True	-10	False	GridWorld	Pentagon	FullObsDiscrete	Individual_Q	1.0	0.05	1000000	4	True
IndivQLearningTabularSweepMillionSteps/55_5_5	none	True	-10	False	GridWorld	Pentagon	FullObsDiscrete	Individual_Q	1.0	0.05	1000000	5	True
IndivQLearningTabularSweepMillionSteps/56_5_6	none	True	-10	False	GridWorld	Pentagon	FullObsDiscrete	Individual_Q	1.0	0.05	1000000	6	True
IndivQLearningTabularSweepMillionSteps/57_5_7	none	True	-10	False	GridWorld	Pentagon	FullObsDiscrete	Individual_Q	1.0	0.05	1000000	7	True
IndivQLearningTabularSweepMillionSteps/58_5_8	none	True	-10	False	GridWorld	Pentagon	FullObsDiscrete	Individual_Q	1.0	0.05	1000000	8	True
IndivQLearningTabularSweepMillionSteps/59_5_9	none	True	-10	False	GridWorld	Pentagon	FullObsDiscrete	Individual_Q	1.0	0.05	1000000	9	True
IndivQLearningTabularSweepMillionSteps/60_6_0	centralized	True	-10	True	GridWorld	ISR	FullObsDiscrete	Individual_Q	1.0	0.05	1000000	0	True
IndivQLearningTabularSweepMillionSteps/61_6_1	centralized	True	-10	True	GridWorld	ISR	FullObsDiscrete	Individual_Q	1.0	0.05	1000000	1	True
IndivQLearningTabularSweepMillionSteps/62_6_2	centralized	True	-10	True	GridWorld	ISR	FullObsDiscrete	Individual_Q	1.0	0.05	1000000	2	True
IndivQLearningTabularSweepMillionSteps/63_6_3	centralized	True	-10	True	GridWorld	ISR	FullObsDiscrete	Individual_Q	1.0	0.05	1000000	3	True
IndivQLearningTabularSweepMillionSteps/64_6_4	centralized	True	-10	True	GridWorld	ISR	FullObsDiscrete	Individual_Q	1.0	0.05	1000000	4	True
IndivQLearningTabularSweepMillionSteps/65_6_5	centralized	True	-10	True	GridWorld	ISR	FullObsDiscrete	Individual_Q	1.0	0.05	1000000	5	True
IndivQLearningTabularSweepMillionSteps/66_6_6	centralized	True	-10	True	GridWorld	ISR	FullObsDiscrete	Individual_Q	1.0	0.05	1000000	6	True
IndivQLearningTabularSweepMillionSteps/67_6_7	centralized	True	-10	True	GridWorld	ISR	FullObsDiscrete	Individual_Q	1.0	0.05	1000000	7	True
IndivQLearningTabularSweepMillionSteps/68_6_8	centralized	True	-10	True	GridWorld	ISR	FullObsDiscrete	Individual_Q	1.0	0.05	1000000	8	True
IndivQLearningTabularSweepMillionSteps/69_6_9	centralized	True	-10	True	GridWorld	ISR	FullObsDiscrete	Individual_Q	1.0	0.05	1000000	9	True
IndivQLearningTabularSweepMillionSteps/70_7_0	decentralized	True	-10	True	GridWorld	ISR	FullObsDiscrete	Individual_Q	1.0	0.05	1000000	0	True
IndivQLearningTabularSweepMillionSteps/71_7_1	decentralized	True	-10	True	GridWorld	ISR	FullObsDiscrete	Individual_Q	1.0	0.05	1000000	1	True
IndivQLearningTabularSweepMillionSteps/72_7_2	decentralized	True	-10	True	GridWorld	ISR	FullObsDiscrete	Individual_Q	1.0	0.05	1000000	2	True
IndivQLearningTabularSweepMillionSteps/73_7_3	decentralized	True	-10	True	GridWorld	ISR	FullObsDiscrete	Individual_Q	1.0	0.05	1000000	3	True
IndivQLearningTabularSweepMillionSteps/74_7_4	decentralized	True	-10	True	GridWorld	ISR	FullObsDiscrete	Individual_Q	1.0	0.05	1000000	4	True
IndivQLearningTabularSweepMillionSteps/75_7_5	decentralized	True	-10	True	GridWorld	ISR	FullObsDiscrete	Individual_Q	1.0	0.05	1000000	5	True
IndivQLearningTabularSweepMillionSteps/76_7_6	decentralized	True	-10	True	GridWorld	ISR	FullObsDiscrete	Individual_Q	1.0	0.05	1000000	6	True
IndivQLearningTabularSweepMillionSteps/77_7_7	decentralized	True	-10	True	GridWorld	ISR	FullObsDiscrete	Individual_Q	1.0	0.05	1000000	7	True
IndivQLearningTabularSweepMillionSteps/78_7_8	decentralized	True	-10	True	GridWorld	ISR	FullObsDiscrete	Individual_Q	1.0	0.05	1000000	8	True
IndivQLearningTabularSweepMillionSteps/79_7_9	decentralized	True	-10	True	GridWorld	ISR	FullObsDiscrete	Individual_Q	1.0	0.05	1000000	9	True
IndivQLearningTabularSweepMillionSteps/80_8_0	none	True	-10	True	GridWorld	ISR	FullObsDiscrete	Individual_Q	1.0	0.05	1000000	0	True
IndivQLearningTabularSweepMillionSteps/81_8_1	none	True	-10	True	GridWorld	ISR	FullObsDiscrete	Individual_Q	1.0	0.05	1000000	1	True
IndivQLearningTabularSweepMillionSteps/82_8_2	none	True	-10	True	GridWorld	ISR	FullObsDiscrete	Individual_Q	1.0	0.05	1000000	2	True
IndivQLearningTabularSweepMillionSteps/83_8_3	none	True	-10	True	GridWorld	ISR	FullObsDiscrete	Individual_Q	1.0	0.05	1000000	3	True
IndivQLearningTabularSweepMillionSteps/84_8_4	none	True	-10	True	GridWorld	ISR	FullObsDiscrete	Individual_Q	1.0	0.05	1000000	4	True
IndivQLearningTabularSweepMillionSteps/85_8_5	none	True	-10	True	GridWorld	ISR	FullObsDiscrete	Individual_Q	1.0	0.05	1000000	5	True
IndivQLearningTabularSweepMillionSteps/86_8_6	none	True	-10	True	GridWorld	ISR	FullObsDiscrete	Individual_Q	1.0	0.05	1000000	6	True
IndivQLearningTabularSweepMillionSteps/87_8_7	none	True	-10	True	GridWorld	ISR	FullObsDiscrete	Individual_Q	1.0	0.05	1000000	7	True
IndivQLearningTabularSweepMillionSteps/88_8_8	none	True	-10	True	GridWorld	ISR	FullObsDiscrete	Individual_Q	1.0	0.05	1000000	8	True
IndivQLearningTabularSweepMillionSteps/89_8_9	none	True	-10	True	GridWorld	ISR	FullObsDiscrete	Individual_Q	1.0	0.05	1000000	9	True
IndivQLearningTabularSweepMillionSteps/90_9_0	centralized	True	-10	False	GridWorld	ISR	FullObsDiscrete	Individual_Q	1.0	0.05	1000000	0	True
IndivQLearningTabularSweepMillionSteps/91_9_1	centralized	True	-10	False	GridWorld	ISR	FullObsDiscrete	Individual_Q	1.0	0.05	1000000	1	True
IndivQLearningTabularSweepMillionSteps/92_9_2	centralized	True	-10	False	GridWorld	ISR	FullObsDiscrete	Individual_Q	1.0	0.05	1000000	2	True
IndivQLearningTabularSweepMillionSteps/93_9_3	centralized	True	-10	False	GridWorld	ISR	FullObsDiscrete	Individual_Q	1.0	0.05	1000000	3	True
IndivQLearningTabularSweepMillionSteps/94_9_4	centralized	True	-10	False	GridWorld	ISR	FullObsDiscrete	Individual_Q	1.0	0.05	1000000	4	True
IndivQLearningTabularSweepMillionSteps/95_9_5	centralized	True	-10	False	GridWorld	ISR	FullObsDiscrete	Individual_Q	1.0	0.05	1000000	5	True
IndivQLearningTabularSweepMillionSteps/96_9_6	centralized	True	-10	False	GridWorld	ISR	FullObsDiscrete	Individual_Q	1.0	0.05	1000000	6	True
IndivQLearningTabularSweepMillionSteps/97_9_7	centralized	True	-10	False	GridWorld	ISR	FullObsDiscrete	Individual_Q	1.0	0.05	1000000	7	True
IndivQLearningTabularSweepMillionSteps/98_9_8	centralized	True	-10	False	GridWorld	ISR	FullObsDiscrete	Individual_Q	1.0	0.05	1000000	8	True
IndivQLearningTabularSweepMillionSteps/99_9_9	centralized	True	-10	False	GridWorld	ISR	FullObsDiscrete	Individual_Q	1.0	0.05	1000000	9	True
IndivQLearningTabularSweepMillionSteps/100_10_0	decentralized	True	-10	False	GridWorld	ISR	FullObsDiscrete	Individual_Q	1.0	0.05	1000000	0	True
IndivQLearningTabularSweepMillionSteps/101_10_1	decentralized	True	-10	False	GridWorld	ISR	FullObsDiscrete	Individual_Q	1.0	0.05	1000000	1	True
IndivQLearningTabularSweepMillionSteps/102_10_2	decentralized	True	-10	False	GridWorld	ISR	FullObsDiscrete	Individual_Q	1.0	0.05	1000000	2	True
IndivQLearningTabularSweepMillionSteps/103_10_3	decentralized	True	-10	False	GridWorld	ISR	FullObsDiscrete	Individual_Q	1.0	0.05	1000000	3	True
IndivQLearningTabularSweepMillionSteps/104_10_4	decentralized	True	-10	False	GridWorld	ISR	FullObsDiscrete	Individual_Q	1.0	0.05	1000000	4	True
IndivQLearningTabularSweepMillionSteps/105_10_5	decentralized	True	-10	False	GridWorld	ISR	FullObsDiscrete	Individual_Q	1.0	0.05	1000000	5	True
IndivQLearningTabularSweepMillionSteps/106_10_6	decentralized	True	-10	False	GridWorld	ISR	FullObsDiscrete	Individual_Q	1.0	0.05	1000000	6	True
IndivQLearningTabularSweepMillionSteps/107_10_7	decentralized	True	-10	False	GridWorld	ISR	FullObsDiscrete	Individual_Q	1.0	0.05	1000000	7	True
IndivQLearningTabularSweepMillionSteps/108_10_8	decentralized	True	-10	False	GridWorld	ISR	FullObsDiscrete	Individual_Q	1.0	0.05	1000000	8	True
IndivQLearningTabularSweepMillionSteps/109_10_9	decentralized	True	-10	False	GridWorld	ISR	FullObsDiscrete	Individual_Q	1.0	0.05	1000000	9	True
IndivQLearningTabularSweepMillionSteps/110_11_0	none	True	-10	False	GridWorld	ISR	FullObsDiscrete	Individual_Q	1.0	0.05	1000000	0	True
IndivQLearningTabularSweepMillionSteps/111_11_1	none	True	-10	False	GridWorld	ISR	FullObsDiscrete	Individual_Q	1.0	0.05	1000000	1	True
IndivQLearningTabularSweepMillionSteps/112_11_2	none	True	-10	False	GridWorld	ISR	FullObsDiscrete	Individual_Q	1.0	0.05	1000000	2	True
IndivQLearningTabularSweepMillionSteps/113_11_3	none	True	-10	False	GridWorld	ISR	FullObsDiscrete	Individual_Q	1.0	0.05	1000000	3	True
IndivQLearningTabularSweepMillionSteps/114_11_4	none	True	-10	False	GridWorld	ISR	FullObsDiscrete	Individual_Q	1.0	0.05	1000000	4	True
IndivQLearningTabularSweepMillionSteps/115_11_5	none	True	-10	False	GridWorld	ISR	FullObsDiscrete	Individual_Q	1.0	0.05	1000000	5	True
IndivQLearningTabularSweepMillionSteps/116_11_6	none	True	-10	False	GridWorld	ISR	FullObsDiscrete	Individual_Q	1.0	0.05	1000000	6	True
IndivQLearningTabularSweepMillionSteps/117_11_7	none	True	-10	False	GridWorld	ISR	FullObsDiscrete	Individual_Q	1.0	0.05	1000000	7	True
IndivQLearningTabularSweepMillionSteps/118_11_8	none	True	-10	False	GridWorld	ISR	FullObsDiscrete	Individual_Q	1.0	0.05	1000000	8	True
IndivQLearningTabularSweepMillionSteps/119_11_9	none	True	-10	False	GridWorld	ISR	FullObsDiscrete	Individual_Q	1.0	0.05	1000000	9	True
IndivQLearningTabularSweepMillionSteps/120_12_0	centralized	True	-10	True	GridWorld	SUNY	FullObsDiscrete	Individual_Q	1.0	0.05	1000000	0	True
IndivQLearningTabularSweepMillionSteps/121_12_1	centralized	True	-10	True	GridWorld	SUNY	FullObsDiscrete	Individual_Q	1.0	0.05	1000000	1	True
IndivQLearningTabularSweepMillionSteps/122_12_2	centralized	True	-10	True	GridWorld	SUNY	FullObsDiscrete	Individual_Q	1.0	0.05	1000000	2	True
IndivQLearningTabularSweepMillionSteps/123_12_3	centralized	True	-10	True	GridWorld	SUNY	FullObsDiscrete	Individual_Q	1.0	0.05	1000000	3	True
IndivQLearningTabularSweepMillionSteps/124_12_4	centralized	True	-10	True	GridWorld	SUNY	FullObsDiscrete	Individual_Q	1.0	0.05	1000000	4	True
IndivQLearningTabularSweepMillionSteps/125_12_5	centralized	True	-10	True	GridWorld	SUNY	FullObsDiscrete	Individual_Q	1.0	0.05	1000000	5	True
IndivQLearningTabularSweepMillionSteps/126_12_6	centralized	True	-10	True	GridWorld	SUNY	FullObsDiscrete	Individual_Q	1.0	0.05	1000000	6	True
IndivQLearningTabularSweepMillionSteps/127_12_7	centralized	True	-10	True	GridWorld	SUNY	FullObsDiscrete	Individual_Q	1.0	0.05	1000000	7	True
IndivQLearningTabularSweepMillionSteps/128_12_8	centralized	True	-10	True	GridWorld	SUNY	FullObsDiscrete	Individual_Q	1.0	0.05	1000000	8	True
IndivQLearningTabularSweepMillionSteps/129_12_9	centralized	True	-10	True	GridWorld	SUNY	FullObsDiscrete	Individual_Q	1.0	0.05	1000000	9	True
IndivQLearningTabularSweepMillionSteps/130_13_0	decentralized	True	-10	True	GridWorld	SUNY	FullObsDiscrete	Individual_Q	1.0	0.05	1000000	0	True
IndivQLearningTabularSweepMillionSteps/131_13_1	decentralized	True	-10	True	GridWorld	SUNY	FullObsDiscrete	Individual_Q	1.0	0.05	1000000	1	True
IndivQLearningTabularSweepMillionSteps/132_13_2	decentralized	True	-10	True	GridWorld	SUNY	FullObsDiscrete	Individual_Q	1.0	0.05	1000000	2	True
IndivQLearningTabularSweepMillionSteps/133_13_3	decentralized	True	-10	True	GridWorld	SUNY	FullObsDiscrete	Individual_Q	1.0	0.05	1000000	3	True
IndivQLearningTabularSweepMillionSteps/134_13_4	decentralized	True	-10	True	GridWorld	SUNY	FullObsDiscrete	Individual_Q	1.0	0.05	1000000	4	True
IndivQLearningTabularSweepMillionSteps/135_13_5	decentralized	True	-10	True	GridWorld	SUNY	FullObsDiscrete	Individual_Q	1.0	0.05	1000000	5	True
IndivQLearningTabularSweepMillionSteps/136_13_6	decentralized	True	-10	True	GridWorld	SUNY	FullObsDiscrete	Individual_Q	1.0	0.05	1000000	6	True
IndivQLearningTabularSweepMillionSteps/137_13_7	decentralized	True	-10	True	GridWorld	SUNY	FullObsDiscrete	Individual_Q	1.0	0.05	1000000	7	True
IndivQLearningTabularSweepMillionSteps/138_13_8	decentralized	True	-10	True	GridWorld	SUNY	FullObsDiscrete	Individual_Q	1.0	0.05	1000000	8	True
IndivQLearningTabularSweepMillionSteps/139_13_9	decentralized	True	-10	True	GridWorld	SUNY	FullObsDiscrete	Individual_Q	1.0	0.05	1000000	9	True
IndivQLearningTabularSweepMillionSteps/140_14_0	none	True	-10	True	GridWorld	SUNY	FullObsDiscrete	Individual_Q	1.0	0.05	1000000	0	True
IndivQLearningTabularSweepMillionSteps/141_14_1	none	True	-10	True	GridWorld	SUNY	FullObsDiscrete	Individual_Q	1.0	0.05	1000000	1	True
IndivQLearningTabularSweepMillionSteps/142_14_2	none	True	-10	True	GridWorld	SUNY	FullObsDiscrete	Individual_Q	1.0	0.05	1000000	2	True
IndivQLearningTabularSweepMillionSteps/143_14_3	none	True	-10	True	GridWorld	SUNY	FullObsDiscrete	Individual_Q	1.0	0.05	1000000	3	True
IndivQLearningTabularSweepMillionSteps/144_14_4	none	True	-10	True	GridWorld	SUNY	FullObsDiscrete	Individual_Q	1.0	0.05	1000000	4	True
IndivQLearningTabularSweepMillionSteps/145_14_5	none	True	-10	True	GridWorld	SUNY	FullObsDiscrete	Individual_Q	1.0	0.05	1000000	5	True
IndivQLearningTabularSweepMillionSteps/146_14_6	none	True	-10	True	GridWorld	SUNY	FullObsDiscrete	Individual_Q	1.0	0.05	1000000	6	True
IndivQLearningTabularSweepMillionSteps/147_14_7	none	True	-10	True	GridWorld	SUNY	FullObsDiscrete	Individual_Q	1.0	0.05	1000000	7	True
IndivQLearningTabularSweepMillionSteps/148_14_8	none	True	-10	True	GridWorld	SUNY	FullObsDiscrete	Individual_Q	1.0	0.05	1000000	8	True
IndivQLearningTabularSweepMillionSteps/149_14_9	none	True	-10	True	GridWorld	SUNY	FullObsDiscrete	Individual_Q	1.0	0.05	1000000	9	True
IndivQLearningTabularSweepMillionSteps/150_15_0	centralized	True	-10	False	GridWorld	SUNY	FullObsDiscrete	Individual_Q	1.0	0.05	1000000	0	True
IndivQLearningTabularSweepMillionSteps/151_15_1	centralized	True	-10	False	GridWorld	SUNY	FullObsDiscrete	Individual_Q	1.0	0.05	1000000	1	True
IndivQLearningTabularSweepMillionSteps/152_15_2	centralized	True	-10	False	GridWorld	SUNY	FullObsDiscrete	Individual_Q	1.0	0.05	1000000	2	True
IndivQLearningTabularSweepMillionSteps/153_15_3	centralized	True	-10	False	GridWorld	SUNY	FullObsDiscrete	Individual_Q	1.0	0.05	1000000	3	True
IndivQLearningTabularSweepMillionSteps/154_15_4	centralized	True	-10	False	GridWorld	SUNY	FullObsDiscrete	Individual_Q	1.0	0.05	1000000	4	True
IndivQLearningTabularSweepMillionSteps/155_15_5	centralized	True	-10	False	GridWorld	SUNY	FullObsDiscrete	Individual_Q	1.0	0.05	1000000	5	True
IndivQLearningTabularSweepMillionSteps/156_15_6	centralized	True	-10	False	GridWorld	SUNY	FullObsDiscrete	Individual_Q	1.0	0.05	1000000	6	True
IndivQLearningTabularSweepMillionSteps/157_15_7	centralized	True	-10	False	GridWorld	SUNY	FullObsDiscrete	Individual_Q	1.0	0.05	1000000	7	True
IndivQLearningTabularSweepMillionSteps/158_15_8	centralized	True	-10	False	GridWorld	SUNY	FullObsDiscrete	Individual_Q	1.0	0.05	1000000	8	True
IndivQLearningTabularSweepMillionSteps/159_15_9	centralized	True	-10	False	GridWorld	SUNY	FullObsDiscrete	Individual_Q	1.0	0.05	1000000	9	True
IndivQLearningTabularSweepMillionSteps/160_16_0	decentralized	True	-10	False	GridWorld	SUNY	FullObsDiscrete	Individual_Q	1.0	0.05	1000000	0	True
IndivQLearningTabularSweepMillionSteps/161_16_1	decentralized	True	-10	False	GridWorld	SUNY	FullObsDiscrete	Individual_Q	1.0	0.05	1000000	1	True
IndivQLearningTabularSweepMillionSteps/162_16_2	decentralized	True	-10	False	GridWorld	SUNY	FullObsDiscrete	Individual_Q	1.0	0.05	1000000	2	True
IndivQLearningTabularSweepMillionSteps/163_16_3	decentralized	True	-10	False	GridWorld	SUNY	FullObsDiscrete	Individual_Q	1.0	0.05	1000000	3	True
IndivQLearningTabularSweepMillionSteps/164_16_4	decentralized	True	-10	False	GridWorld	SUNY	FullObsDiscrete	Individual_Q	1.0	0.05	1000000	4	True
IndivQLearningTabularSweepMillionSteps/165_16_5	decentralized	True	-10	False	GridWorld	SUNY	FullObsDiscrete	Individual_Q	1.0	0.05	1000000	5	True
IndivQLearningTabularSweepMillionSteps/166_16_6	decentralized	True	-10	False	GridWorld	SUNY	FullObsDiscrete	Individual_Q	1.0	0.05	1000000	6	True
IndivQLearningTabularSweepMillionSteps/167_16_7	decentralized	True	-10	False	GridWorld	SUNY	FullObsDiscrete	Individual_Q	1.0	0.05	1000000	7	True
IndivQLearningTabularSweepMillionSteps/168_16_8	decentralized	True	-10	False	GridWorld	SUNY	FullObsDiscrete	Individual_Q	1.0	0.05	1000000	8	True
IndivQLearningTabularSweepMillionSteps/169_16_9	decentralized	True	-10	False	GridWorld	SUNY	FullObsDiscrete	Individual_Q	1.0	0.05	1000000	9	True
IndivQLearningTabularSweepMillionSteps/170_17_0	none	True	-10	False	GridWorld	SUNY	FullObsDiscrete	Individual_Q	1.0	0.05	1000000	0	True
IndivQLearningTabularSweepMillionSteps/171_17_1	none	True	-10	False	GridWorld	SUNY	FullObsDiscrete	Individual_Q	1.0	0.05	1000000	1	True
IndivQLearningTabularSweepMillionSteps/172_17_2	none	True	-10	False	GridWorld	SUNY	FullObsDiscrete	Individual_Q	1.0	0.05	1000000	2	True
IndivQLearningTabularSweepMillionSteps/173_17_3	none	True	-10	False	GridWorld	SUNY	FullObsDiscrete	Individual_Q	1.0	0.05	1000000	3	True
IndivQLearningTabularSweepMillionSteps/174_17_4	none	True	-10	False	GridWorld	SUNY	FullObsDiscrete	Individual_Q	1.0	0.05	1000000	4	True
IndivQLearningTabularSweepMillionSteps/175_17_5	none	True	-10	False	GridWorld	SUNY	FullObsDiscrete	Individual_Q	1.0	0.05	1000000	5	True
IndivQLearningTabularSweepMillionSteps/176_17_6	none	True	-10	False	GridWorld	SUNY	FullObsDiscrete	Individual_Q	1.0	0.05	1000000	6	True
IndivQLearningTabularSweepMillionSteps/177_17_7	none	True	-10	False	GridWorld	SUNY	FullObsDiscrete	Individual_Q	1.0	0.05	1000000	7	True
IndivQLearningTabularSweepMillionSteps/178_17_8	none	True	-10	False	GridWorld	SUNY	FullObsDiscrete	Individual_Q	1.0	0.05	1000000	8	True
IndivQLearningTabularSweepMillionSteps/179_17_9	none	True	-10	False	GridWorld	SUNY	FullObsDiscrete	Individual_Q	1.0	0.05	1000000	9	True
IndivQLearningTabularSweepMillionSteps/180_18_0	centralized	True	-10	True	GridWorld	MIT	FullObsDiscrete	Individual_Q	1.0	0.05	1000000	0	True
IndivQLearningTabularSweepMillionSteps/181_18_1	centralized	True	-10	True	GridWorld	MIT	FullObsDiscrete	Individual_Q	1.0	0.05	1000000	1	True
IndivQLearningTabularSweepMillionSteps/182_18_2	centralized	True	-10	True	GridWorld	MIT	FullObsDiscrete	Individual_Q	1.0	0.05	1000000	2	True
IndivQLearningTabularSweepMillionSteps/183_18_3	centralized	True	-10	True	GridWorld	MIT	FullObsDiscrete	Individual_Q	1.0	0.05	1000000	3	True
IndivQLearningTabularSweepMillionSteps/184_18_4	centralized	True	-10	True	GridWorld	MIT	FullObsDiscrete	Individual_Q	1.0	0.05	1000000	4	True
IndivQLearningTabularSweepMillionSteps/185_18_5	centralized	True	-10	True	GridWorld	MIT	FullObsDiscrete	Individual_Q	1.0	0.05	1000000	5	True
IndivQLearningTabularSweepMillionSteps/186_18_6	centralized	True	-10	True	GridWorld	MIT	FullObsDiscrete	Individual_Q	1.0	0.05	1000000	6	True
IndivQLearningTabularSweepMillionSteps/187_18_7	centralized	True	-10	True	GridWorld	MIT	FullObsDiscrete	Individual_Q	1.0	0.05	1000000	7	True
IndivQLearningTabularSweepMillionSteps/188_18_8	centralized	True	-10	True	GridWorld	MIT	FullObsDiscrete	Individual_Q	1.0	0.05	1000000	8	True
IndivQLearningTabularSweepMillionSteps/189_18_9	centralized	True	-10	True	GridWorld	MIT	FullObsDiscrete	Individual_Q	1.0	0.05	1000000	9	True
IndivQLearningTabularSweepMillionSteps/190_19_0	decentralized	True	-10	True	GridWorld	MIT	FullObsDiscrete	Individual_Q	1.0	0.05	1000000	0	True
IndivQLearningTabularSweepMillionSteps/191_19_1	decentralized	True	-10	True	GridWorld	MIT	FullObsDiscrete	Individual_Q	1.0	0.05	1000000	1	True
IndivQLearningTabularSweepMillionSteps/192_19_2	decentralized	True	-10	True	GridWorld	MIT	FullObsDiscrete	Individual_Q	1.0	0.05	1000000	2	True
IndivQLearningTabularSweepMillionSteps/193_19_3	decentralized	True	-10	True	GridWorld	MIT	FullObsDiscrete	Individual_Q	1.0	0.05	1000000	3	True
IndivQLearningTabularSweepMillionSteps/194_19_4	decentralized	True	-10	True	GridWorld	MIT	FullObsDiscrete	Individual_Q	1.0	0.05	1000000	4	True
IndivQLearningTabularSweepMillionSteps/195_19_5	decentralized	True	-10	True	GridWorld	MIT	FullObsDiscrete	Individual_Q	1.0	0.05	1000000	5	True
IndivQLearningTabularSweepMillionSteps/196_19_6	decentralized	True	-10	True	GridWorld	MIT	FullObsDiscrete	Individual_Q	1.0	0.05	1000000	6	True
IndivQLearningTabularSweepMillionSteps/197_19_7	decentralized	True	-10	True	GridWorld	MIT	FullObsDiscrete	Individual_Q	1.0	0.05	1000000	7	True
IndivQLearningTabularSweepMillionSteps/198_19_8	decentralized	True	-10	True	GridWorld	MIT	FullObsDiscrete	Individual_Q	1.0	0.05	1000000	8	True
IndivQLearningTabularSweepMillionSteps/199_19_9	decentralized	True	-10	True	GridWorld	MIT	FullObsDiscrete	Individual_Q	1.0	0.05	1000000	9	True
IndivQLearningTabularSweepMillionSteps/200_20_0	none	True	-10	True	GridWorld	MIT	FullObsDiscrete	Individual_Q	1.0	0.05	1000000	0	True
IndivQLearningTabularSweepMillionSteps/201_20_1	none	True	-10	True	GridWorld	MIT	FullObsDiscrete	Individual_Q	1.0	0.05	1000000	1	True
IndivQLearningTabularSweepMillionSteps/202_20_2	none	True	-10	True	GridWorld	MIT	FullObsDiscrete	Individual_Q	1.0	0.05	1000000	2	True
IndivQLearningTabularSweepMillionSteps/203_20_3	none	True	-10	True	GridWorld	MIT	FullObsDiscrete	Individual_Q	1.0	0.05	1000000	3	True
IndivQLearningTabularSweepMillionSteps/204_20_4	none	True	-10	True	GridWorld	MIT	FullObsDiscrete	Individual_Q	1.0	0.05	1000000	4	True
IndivQLearningTabularSweepMillionSteps/205_20_5	none	True	-10	True	GridWorld	MIT	FullObsDiscrete	Individual_Q	1.0	0.05	1000000	5	True
IndivQLearningTabularSweepMillionSteps/206_20_6	none	True	-10	True	GridWorld	MIT	FullObsDiscrete	Individual_Q	1.0	0.05	1000000	6	True
IndivQLearningTabularSweepMillionSteps/207_20_7	none	True	-10	True	GridWorld	MIT	FullObsDiscrete	Individual_Q	1.0	0.05	1000000	7	True
IndivQLearningTabularSweepMillionSteps/208_20_8	none	True	-10	True	GridWorld	MIT	FullObsDiscrete	Individual_Q	1.0	0.05	1000000	8	True
IndivQLearningTabularSweepMillionSteps/209_20_9	none	True	-10	True	GridWorld	MIT	FullObsDiscrete	Individual_Q	1.0	0.05	1000000	9	True
IndivQLearningTabularSweepMillionSteps/210_21_0	centralized	True	-10	False	GridWorld	MIT	FullObsDiscrete	Individual_Q	1.0	0.05	1000000	0	True
IndivQLearningTabularSweepMillionSteps/211_21_1	centralized	True	-10	False	GridWorld	MIT	FullObsDiscrete	Individual_Q	1.0	0.05	1000000	1	True
IndivQLearningTabularSweepMillionSteps/212_21_2	centralized	True	-10	False	GridWorld	MIT	FullObsDiscrete	Individual_Q	1.0	0.05	1000000	2	True
IndivQLearningTabularSweepMillionSteps/213_21_3	centralized	True	-10	False	GridWorld	MIT	FullObsDiscrete	Individual_Q	1.0	0.05	1000000	3	True
IndivQLearningTabularSweepMillionSteps/214_21_4	centralized	True	-10	False	GridWorld	MIT	FullObsDiscrete	Individual_Q	1.0	0.05	1000000	4	True
IndivQLearningTabularSweepMillionSteps/215_21_5	centralized	True	-10	False	GridWorld	MIT	FullObsDiscrete	Individual_Q	1.0	0.05	1000000	5	True
IndivQLearningTabularSweepMillionSteps/216_21_6	centralized	True	-10	False	GridWorld	MIT	FullObsDiscrete	Individual_Q	1.0	0.05	1000000	6	True
IndivQLearningTabularSweepMillionSteps/217_21_7	centralized	True	-10	False	GridWorld	MIT	FullObsDiscrete	Individual_Q	1.0	0.05	1000000	7	True
IndivQLearningTabularSweepMillionSteps/218_21_8	centralized	True	-10	False	GridWorld	MIT	FullObsDiscrete	Individual_Q	1.0	0.05	1000000	8	True
IndivQLearningTabularSweepMillionSteps/219_21_9	centralized	True	-10	False	GridWorld	MIT	FullObsDiscrete	Individual_Q	1.0	0.05	1000000	9	True
IndivQLearningTabularSweepMillionSteps/220_22_0	decentralized	True	-10	False	GridWorld	MIT	FullObsDiscrete	Individual_Q	1.0	0.05	1000000	0	True
IndivQLearningTabularSweepMillionSteps/221_22_1	decentralized	True	-10	False	GridWorld	MIT	FullObsDiscrete	Individual_Q	1.0	0.05	1000000	1	True
IndivQLearningTabularSweepMillionSteps/222_22_2	decentralized	True	-10	False	GridWorld	MIT	FullObsDiscrete	Individual_Q	1.0	0.05	1000000	2	True
IndivQLearningTabularSweepMillionSteps/223_22_3	decentralized	True	-10	False	GridWorld	MIT	FullObsDiscrete	Individual_Q	1.0	0.05	1000000	3	True
IndivQLearningTabularSweepMillionSteps/224_22_4	decentralized	True	-10	False	GridWorld	MIT	FullObsDiscrete	Individual_Q	1.0	0.05	1000000	4	True
IndivQLearningTabularSweepMillionSteps/225_22_5	decentralized	True	-10	False	GridWorld	MIT	FullObsDiscrete	Individual_Q	1.0	0.05	1000000	5	True
IndivQLearningTabularSweepMillionSteps/226_22_6	decentralized	True	-10	False	GridWorld	MIT	FullObsDiscrete	Individual_Q	1.0	0.05	1000000	6	True
IndivQLearningTabularSweepMillionSteps/227_22_7	decentralized	True	-10	False	GridWorld	MIT	FullObsDiscrete	Individual_Q	1.0	0.05	1000000	7	True
IndivQLearningTabularSweepMillionSteps/228_22_8	decentralized	True	-10	False	GridWorld	MIT	FullObsDiscrete	Individual_Q	1.0	0.05	1000000	8	True
IndivQLearningTabularSweepMillionSteps/229_22_9	decentralized	True	-10	False	GridWorld	MIT	FullObsDiscrete	Individual_Q	1.0	0.05	1000000	9	True
IndivQLearningTabularSweepMillionSteps/230_23_0	none	True	-10	False	GridWorld	MIT	FullObsDiscrete	Individual_Q	1.0	0.05	1000000	0	True
IndivQLearningTabularSweepMillionSteps/231_23_1	none	True	-10	False	GridWorld	MIT	FullObsDiscrete	Individual_Q	1.0	0.05	1000000	1	True
IndivQLearningTabularSweepMillionSteps/232_23_2	none	True	-10	False	GridWorld	MIT	FullObsDiscrete	Individual_Q	1.0	0.05	1000000	2	True
IndivQLearningTabularSweepMillionSteps/233_23_3	none	True	-10	False	GridWorld	MIT	FullObsDiscrete	Individual_Q	1.0	0.05	1000000	3	True
IndivQLearningTabularSweepMillionSteps/234_23_4	none	True	-10	False	GridWorld	MIT	FullObsDiscrete	Individual_Q	1.0	0.05	1000000	4	True
IndivQLearningTabularSweepMillionSteps/235_23_5	none	True	-10	False	GridWorld	MIT	FullObsDiscrete	Individual_Q	1.0	0.05	1000000	5	True
IndivQLearningTabularSweepMillionSteps/236_23_6	none	True	-10	False	GridWorld	MIT	FullObsDiscrete	Individual_Q	1.0	0.05	1000000	6	True
IndivQLearningTabularSweepMillionSteps/237_23_7	none	True	-10	False	GridWorld	MIT	FullObsDiscrete	Individual_Q	1.0	0.05	1000000	7	True
IndivQLearningTabularSweepMillionSteps/238_23_8	none	True	-10	False	GridWorld	MIT	FullObsDiscrete	Individual_Q	1.0	0.05	1000000	8	True
IndivQLearningTabularSweepMillionSteps/239_23_9	none	True	-10	False	GridWorld	MIT	FullObsDiscrete	Individual_Q	1.0	0.05	1000000	9	True
