# Supplementary material
Source: ML conference proceedings conference paper supplement (https://proceedings.neurips.cc/paper_files/paper/2022/hash/57444e14ecd9e2c8f603b4f012ce3811-Abstract.html)
Supplement: Supplementary file 1 [file 57444e14ecd9e2c8f603b4f012ce3811-Supplemental-Conference.zip › 3410_shield_decentralization_for_sa-Supplementary Material/parallel_configs/IndivQLearningTabularSweepRedoSUNYEval.csv]

run_name	shield	punish_unsafe_orig_action	punish_unsafe_orig_action_modifier	randomize_starts	map_type	grid_world_map_name	grid_world_obs_type	learner_type	learner_anneal_eps_start	learner_anneal_eps_finish	max_total_steps	seed	skip_training	evaluation_run_name	evaluation_shield	learner_evaluation_epsilon
IndivQLearningTabularSweepRedoSUNY/0_0_0	centralized	True	-10	True	GridWorld	SUNY	FullObsDiscrete	Individual_Q	1.0	0.05	2500000	0	True	IndivQLearningTabularSweepRedoSUNY/0_0_0_centralized	centralized	0.05
IndivQLearningTabularSweepRedoSUNY/0_0_0	centralized	True	-10	True	GridWorld	SUNY	FullObsDiscrete	Individual_Q	1.0	0.05	2500000	0	True	IndivQLearningTabularSweepRedoSUNY/0_0_0_decentralized	decentralized	0.05
IndivQLearningTabularSweepRedoSUNY/0_0_0	centralized	True	-10	True	GridWorld	SUNY	FullObsDiscrete	Individual_Q	1.0	0.05	2500000	0	True	IndivQLearningTabularSweepRedoSUNY/0_0_0_none	none	0.05
IndivQLearningTabularSweepRedoSUNY/1_0_1	centralized	True	-10	True	GridWorld	SUNY	FullObsDiscrete	Individual_Q	1.0	0.05	2500000	1	True	IndivQLearningTabularSweepRedoSUNY/1_0_1_centralized	centralized	0.05
IndivQLearningTabularSweepRedoSUNY/1_0_1	centralized	True	-10	True	GridWorld	SUNY	FullObsDiscrete	Individual_Q	1.0	0.05	2500000	1	True	IndivQLearningTabularSweepRedoSUNY/1_0_1_decentralized	decentralized	0.05
IndivQLearningTabularSweepRedoSUNY/1_0_1	centralized	True	-10	True	GridWorld	SUNY	FullObsDiscrete	Individual_Q	1.0	0.05	2500000	1	True	IndivQLearningTabularSweepRedoSUNY/1_0_1_none	none	0.05
IndivQLearningTabularSweepRedoSUNY/2_0_2	centralized	True	-10	True	GridWorld	SUNY	FullObsDiscrete	Individual_Q	1.0	0.05	2500000	2	True	IndivQLearningTabularSweepRedoSUNY/2_0_2_centralized	centralized	0.05
IndivQLearningTabularSweepRedoSUNY/2_0_2	centralized	True	-10	True	GridWorld	SUNY	FullObsDiscrete	Individual_Q	1.0	0.05	2500000	2	True	IndivQLearningTabularSweepRedoSUNY/2_0_2_decentralized	decentralized	0.05
IndivQLearningTabularSweepRedoSUNY/2_0_2	centralized	True	-10	True	GridWorld	SUNY	FullObsDiscrete	Individual_Q	1.0	0.05	2500000	2	True	IndivQLearningTabularSweepRedoSUNY/2_0_2_none	none	0.05
IndivQLearningTabularSweepRedoSUNY/3_0_3	centralized	True	-10	True	GridWorld	SUNY	FullObsDiscrete	Individual_Q	1.0	0.05	2500000	3	True	IndivQLearningTabularSweepRedoSUNY/3_0_3_centralized	centralized	0.05
IndivQLearningTabularSweepRedoSUNY/3_0_3	centralized	True	-10	True	GridWorld	SUNY	FullObsDiscrete	Individual_Q	1.0	0.05	2500000	3	True	IndivQLearningTabularSweepRedoSUNY/3_0_3_decentralized	decentralized	0.05
IndivQLearningTabularSweepRedoSUNY/3_0_3	centralized	True	-10	True	GridWorld	SUNY	FullObsDiscrete	Individual_Q	1.0	0.05	2500000	3	True	IndivQLearningTabularSweepRedoSUNY/3_0_3_none	none	0.05
IndivQLearningTabularSweepRedoSUNY/4_0_4	centralized	True	-10	True	GridWorld	SUNY	FullObsDiscrete	Individual_Q	1.0	0.05	2500000	4	True	IndivQLearningTabularSweepRedoSUNY/4_0_4_centralized	centralized	0.05
IndivQLearningTabularSweepRedoSUNY/4_0_4	centralized	True	-10	True	GridWorld	SUNY	FullObsDiscrete	Individual_Q	1.0	0.05	2500000	4	True	IndivQLearningTabularSweepRedoSUNY/4_0_4_decentralized	decentralized	0.05
IndivQLearningTabularSweepRedoSUNY/4_0_4	centralized	True	-10	True	GridWorld	SUNY	FullObsDiscrete	Individual_Q	1.0	0.05	2500000	4	True	IndivQLearningTabularSweepRedoSUNY/4_0_4_none	none	0.05
IndivQLearningTabularSweepRedoSUNY/5_0_5	centralized	True	-10	True	GridWorld	SUNY	FullObsDiscrete	Individual_Q	1.0	0.05	2500000	5	True	IndivQLearningTabularSweepRedoSUNY/5_0_5_centralized	centralized	0.05
IndivQLearningTabularSweepRedoSUNY/5_0_5	centralized	True	-10	True	GridWorld	SUNY	FullObsDiscrete	Individual_Q	1.0	0.05	2500000	5	True	IndivQLearningTabularSweepRedoSUNY/5_0_5_decentralized	decentralized	0.05
IndivQLearningTabularSweepRedoSUNY/5_0_5	centralized	True	-10	True	GridWorld	SUNY	FullObsDiscrete	Individual_Q	1.0	0.05	2500000	5	True	IndivQLearningTabularSweepRedoSUNY/5_0_5_none	none	0.05
IndivQLearningTabularSweepRedoSUNY/6_0_6	centralized	True	-10	True	GridWorld	SUNY	FullObsDiscrete	Individual_Q	1.0	0.05	2500000	6	True	IndivQLearningTabularSweepRedoSUNY/6_0_6_centralized	centralized	0.05
IndivQLearningTabularSweepRedoSUNY/6_0_6	centralized	True	-10	True	GridWorld	SUNY	FullObsDiscrete	Individual_Q	1.0	0.05	2500000	6	True	IndivQLearningTabularSweepRedoSUNY/6_0_6_decentralized	decentralized	0.05
IndivQLearningTabularSweepRedoSUNY/6_0_6	centralized	True	-10	True	GridWorld	SUNY	FullObsDiscrete	Individual_Q	1.0	0.05	2500000	6	True	IndivQLearningTabularSweepRedoSUNY/6_0_6_none	none	0.05
IndivQLearningTabularSweepRedoSUNY/7_0_7	centralized	True	-10	True	GridWorld	SUNY	FullObsDiscrete	Individual_Q	1.0	0.05	2500000	7	True	IndivQLearningTabularSweepRedoSUNY/7_0_7_centralized	centralized	0.05
IndivQLearningTabularSweepRedoSUNY/7_0_7	centralized	True	-10	True	GridWorld	SUNY	FullObsDiscrete	Individual_Q	1.0	0.05	2500000	7	True	IndivQLearningTabularSweepRedoSUNY/7_0_7_decentralized	decentralized	0.05
IndivQLearningTabularSweepRedoSUNY/7_0_7	centralized	True	-10	True	GridWorld	SUNY	FullObsDiscrete	Individual_Q	1.0	0.05	2500000	7	True	IndivQLearningTabularSweepRedoSUNY/7_0_7_none	none	0.05
IndivQLearningTabularSweepRedoSUNY/8_0_8	centralized	True	-10	True	GridWorld	SUNY	FullObsDiscrete	Individual_Q	1.0	0.05	2500000	8	True	IndivQLearningTabularSweepRedoSUNY/8_0_8_centralized	centralized	0.05
IndivQLearningTabularSweepRedoSUNY/8_0_8	centralized	True	-10	True	GridWorld	SUNY	FullObsDiscrete	Individual_Q	1.0	0.05	2500000	8	True	IndivQLearningTabularSweepRedoSUNY/8_0_8_decentralized	decentralized	0.05
IndivQLearningTabularSweepRedoSUNY/8_0_8	centralized	True	-10	True	GridWorld	SUNY	FullObsDiscrete	Individual_Q	1.0	0.05	2500000	8	True	IndivQLearningTabularSweepRedoSUNY/8_0_8_none	none	0.05
IndivQLearningTabularSweepRedoSUNY/9_0_9	centralized	True	-10	True	GridWorld	SUNY	FullObsDiscrete	Individual_Q	1.0	0.05	2500000	9	True	IndivQLearningTabularSweepRedoSUNY/9_0_9_centralized	centralized	0.05
IndivQLearningTabularSweepRedoSUNY/9_0_9	centralized	True	-10	True	GridWorld	SUNY	FullObsDiscrete	Individual_Q	1.0	0.05	2500000	9	True	IndivQLearningTabularSweepRedoSUNY/9_0_9_decentralized	decentralized	0.05
IndivQLearningTabularSweepRedoSUNY/9_0_9	centralized	True	-10	True	GridWorld	SUNY	FullObsDiscrete	Individual_Q	1.0	0.05	2500000	9	True	IndivQLearningTabularSweepRedoSUNY/9_0_9_none	none	0.05
IndivQLearningTabularSweepRedoSUNY/10_1_0	decentralized	True	-10	True	GridWorld	SUNY	FullObsDiscrete	Individual_Q	1.0	0.05	2500000	0	True	IndivQLearningTabularSweepRedoSUNY/10_1_0_centralized	centralized	0.05
IndivQLearningTabularSweepRedoSUNY/10_1_0	decentralized	True	-10	True	GridWorld	SUNY	FullObsDiscrete	Individual_Q	1.0	0.05	2500000	0	True	IndivQLearningTabularSweepRedoSUNY/10_1_0_decentralized	decentralized	0.05
IndivQLearningTabularSweepRedoSUNY/10_1_0	decentralized	True	-10	True	GridWorld	SUNY	FullObsDiscrete	Individual_Q	1.0	0.05	2500000	0	True	IndivQLearningTabularSweepRedoSUNY/10_1_0_none	none	0.05
IndivQLearningTabularSweepRedoSUNY/11_1_1	decentralized	True	-10	True	GridWorld	SUNY	FullObsDiscrete	Individual_Q	1.0	0.05	2500000	1	True	IndivQLearningTabularSweepRedoSUNY/11_1_1_centralized	centralized	0.05
IndivQLearningTabularSweepRedoSUNY/11_1_1	decentralized	True	-10	True	GridWorld	SUNY	FullObsDiscrete	Individual_Q	1.0	0.05	2500000	1	True	IndivQLearningTabularSweepRedoSUNY/11_1_1_decentralized	decentralized	0.05
IndivQLearningTabularSweepRedoSUNY/11_1_1	decentralized	True	-10	True	GridWorld	SUNY	FullObsDiscrete	Individual_Q	1.0	0.05	2500000	1	True	IndivQLearningTabularSweepRedoSUNY/11_1_1_none	none	0.05
IndivQLearningTabularSweepRedoSUNY/12_1_2	decentralized	True	-10	True	GridWorld	SUNY	FullObsDiscrete	Individual_Q	1.0	0.05	2500000	2	True	IndivQLearningTabularSweepRedoSUNY/12_1_2_centralized	centralized	0.05
IndivQLearningTabularSweepRedoSUNY/12_1_2	decentralized	True	-10	True	GridWorld	SUNY	FullObsDiscrete	Individual_Q	1.0	0.05	2500000	2	True	IndivQLearningTabularSweepRedoSUNY/12_1_2_decentralized	decentralized	0.05
IndivQLearningTabularSweepRedoSUNY/12_1_2	decentralized	True	-10	True	GridWorld	SUNY	FullObsDiscrete	Individual_Q	1.0	0.05	2500000	2	True	IndivQLearningTabularSweepRedoSUNY/12_1_2_none	none	0.05
IndivQLearningTabularSweepRedoSUNY/13_1_3	decentralized	True	-10	True	GridWorld	SUNY	FullObsDiscrete	Individual_Q	1.0	0.05	2500000	3	True	IndivQLearningTabularSweepRedoSUNY/13_1_3_centralized	centralized	0.05
IndivQLearningTabularSweepRedoSUNY/13_1_3	decentralized	True	-10	True	GridWorld	SUNY	FullObsDiscrete	Individual_Q	1.0	0.05	2500000	3	True	IndivQLearningTabularSweepRedoSUNY/13_1_3_decentralized	decentralized	0.05
IndivQLearningTabularSweepRedoSUNY/13_1_3	decentralized	True	-10	True	GridWorld	SUNY	FullObsDiscrete	Individual_Q	1.0	0.05	2500000	3	True	IndivQLearningTabularSweepRedoSUNY/13_1_3_none	none	0.05
IndivQLearningTabularSweepRedoSUNY/14_1_4	decentralized	True	-10	True	GridWorld	SUNY	FullObsDiscrete	Individual_Q	1.0	0.05	2500000	4	True	IndivQLearningTabularSweepRedoSUNY/14_1_4_centralized	centralized	0.05
IndivQLearningTabularSweepRedoSUNY/14_1_4	decentralized	True	-10	True	GridWorld	SUNY	FullObsDiscrete	Individual_Q	1.0	0.05	2500000	4	True	IndivQLearningTabularSweepRedoSUNY/14_1_4_decentralized	decentralized	0.05
IndivQLearningTabularSweepRedoSUNY/14_1_4	decentralized	True	-10	True	GridWorld	SUNY	FullObsDiscrete	Individual_Q	1.0	0.05	2500000	4	True	IndivQLearningTabularSweepRedoSUNY/14_1_4_none	none	0.05
IndivQLearningTabularSweepRedoSUNY/15_1_5	decentralized	True	-10	True	GridWorld	SUNY	FullObsDiscrete	Individual_Q	1.0	0.05	2500000	5	True	IndivQLearningTabularSweepRedoSUNY/15_1_5_centralized	centralized	0.05
IndivQLearningTabularSweepRedoSUNY/15_1_5	decentralized	True	-10	True	GridWorld	SUNY	FullObsDiscrete	Individual_Q	1.0	0.05	2500000	5	True	IndivQLearningTabularSweepRedoSUNY/15_1_5_decentralized	decentralized	0.05
IndivQLearningTabularSweepRedoSUNY/15_1_5	decentralized	True	-10	True	GridWorld	SUNY	FullObsDiscrete	Individual_Q	1.0	0.05	2500000	5	True	IndivQLearningTabularSweepRedoSUNY/15_1_5_none	none	0.05
IndivQLearningTabularSweepRedoSUNY/16_1_6	decentralized	True	-10	True	GridWorld	SUNY	FullObsDiscrete	Individual_Q	1.0	0.05	2500000	6	True	IndivQLearningTabularSweepRedoSUNY/16_1_6_centralized	centralized	0.05
IndivQLearningTabularSweepRedoSUNY/16_1_6	decentralized	True	-10	True	GridWorld	SUNY	FullObsDiscrete	Individual_Q	1.0	0.05	2500000	6	True	IndivQLearningTabularSweepRedoSUNY/16_1_6_decentralized	decentralized	0.05
IndivQLearningTabularSweepRedoSUNY/16_1_6	decentralized	True	-10	True	GridWorld	SUNY	FullObsDiscrete	Individual_Q	1.0	0.05	2500000	6	True	IndivQLearningTabularSweepRedoSUNY/16_1_6_none	none	0.05
IndivQLearningTabularSweepRedoSUNY/17_1_7	decentralized	True	-10	True	GridWorld	SUNY	FullObsDiscrete	Individual_Q	1.0	0.05	2500000	7	True	IndivQLearningTabularSweepRedoSUNY/17_1_7_centralized	centralized	0.05
IndivQLearningTabularSweepRedoSUNY/17_1_7	decentralized	True	-10	True	GridWorld	SUNY	FullObsDiscrete	Individual_Q	1.0	0.05	2500000	7	True	IndivQLearningTabularSweepRedoSUNY/17_1_7_decentralized	decentralized	0.05
IndivQLearningTabularSweepRedoSUNY/17_1_7	decentralized	True	-10	True	GridWorld	SUNY	FullObsDiscrete	Individual_Q	1.0	0.05	2500000	7	True	IndivQLearningTabularSweepRedoSUNY/17_1_7_none	none	0.05
IndivQLearningTabularSweepRedoSUNY/18_1_8	decentralized	True	-10	True	GridWorld	SUNY	FullObsDiscrete	Individual_Q	1.0	0.05	2500000	8	True	IndivQLearningTabularSweepRedoSUNY/18_1_8_centralized	centralized	0.05
IndivQLearningTabularSweepRedoSUNY/18_1_8	decentralized	True	-10	True	GridWorld	SUNY	FullObsDiscrete	Individual_Q	1.0	0.05	2500000	8	True	IndivQLearningTabularSweepRedoSUNY/18_1_8_decentralized	decentralized	0.05
IndivQLearningTabularSweepRedoSUNY/18_1_8	decentralized	True	-10	True	GridWorld	SUNY	FullObsDiscrete	Individual_Q	1.0	0.05	2500000	8	True	IndivQLearningTabularSweepRedoSUNY/18_1_8_none	none	0.05
IndivQLearningTabularSweepRedoSUNY/19_1_9	decentralized	True	-10	True	GridWorld	SUNY	FullObsDiscrete	Individual_Q	1.0	0.05	2500000	9	True	IndivQLearningTabularSweepRedoSUNY/19_1_9_centralized	centralized	0.05
IndivQLearningTabularSweepRedoSUNY/19_1_9	decentralized	True	-10	True	GridWorld	SUNY	FullObsDiscrete	Individual_Q	1.0	0.05	2500000	9	True	IndivQLearningTabularSweepRedoSUNY/19_1_9_decentralized	decentralized	0.05
IndivQLearningTabularSweepRedoSUNY/19_1_9	decentralized	True	-10	True	GridWorld	SUNY	FullObsDiscrete	Individual_Q	1.0	0.05	2500000	9	True	IndivQLearningTabularSweepRedoSUNY/19_1_9_none	none	0.05
IndivQLearningTabularSweepRedoSUNY/20_2_0	none	True	-10	True	GridWorld	SUNY	FullObsDiscrete	Individual_Q	1.0	0.05	2500000	0	True	IndivQLearningTabularSweepRedoSUNY/20_2_0_centralized	centralized	0.05
IndivQLearningTabularSweepRedoSUNY/20_2_0	none	True	-10	True	GridWorld	SUNY	FullObsDiscrete	Individual_Q	1.0	0.05	2500000	0	True	IndivQLearningTabularSweepRedoSUNY/20_2_0_decentralized	decentralized	0.05
IndivQLearningTabularSweepRedoSUNY/20_2_0	none	True	-10	True	GridWorld	SUNY	FullObsDiscrete	Individual_Q	1.0	0.05	2500000	0	True	IndivQLearningTabularSweepRedoSUNY/20_2_0_none	none	0.05
IndivQLearningTabularSweepRedoSUNY/21_2_1	none	True	-10	True	GridWorld	SUNY	FullObsDiscrete	Individual_Q	1.0	0.05	2500000	1	True	IndivQLearningTabularSweepRedoSUNY/21_2_1_centralized	centralized	0.05
IndivQLearningTabularSweepRedoSUNY/21_2_1	none	True	-10	True	GridWorld	SUNY	FullObsDiscrete	Individual_Q	1.0	0.05	2500000	1	True	IndivQLearningTabularSweepRedoSUNY/21_2_1_decentralized	decentralized	0.05
IndivQLearningTabularSweepRedoSUNY/21_2_1	none	True	-10	True	GridWorld	SUNY	FullObsDiscrete	Individual_Q	1.0	0.05	2500000	1	True	IndivQLearningTabularSweepRedoSUNY/21_2_1_none	none	0.05
IndivQLearningTabularSweepRedoSUNY/22_2_2	none	True	-10	True	GridWorld	SUNY	FullObsDiscrete	Individual_Q	1.0	0.05	2500000	2	True	IndivQLearningTabularSweepRedoSUNY/22_2_2_centralized	centralized	0.05
IndivQLearningTabularSweepRedoSUNY/22_2_2	none	True	-10	True	GridWorld	SUNY	FullObsDiscrete	Individual_Q	1.0	0.05	2500000	2	True	IndivQLearningTabularSweepRedoSUNY/22_2_2_decentralized	decentralized	0.05
IndivQLearningTabularSweepRedoSUNY/22_2_2	none	True	-10	True	GridWorld	SUNY	FullObsDiscrete	Individual_Q	1.0	0.05	2500000	2	True	IndivQLearningTabularSweepRedoSUNY/22_2_2_none	none	0.05
IndivQLearningTabularSweepRedoSUNY/23_2_3	none	True	-10	True	GridWorld	SUNY	FullObsDiscrete	Individual_Q	1.0	0.05	2500000	3	True	IndivQLearningTabularSweepRedoSUNY/23_2_3_centralized	centralized	0.05
IndivQLearningTabularSweepRedoSUNY/23_2_3	none	True	-10	True	GridWorld	SUNY	FullObsDiscrete	Individual_Q	1.0	0.05	2500000	3	True	IndivQLearningTabularSweepRedoSUNY/23_2_3_decentralized	decentralized	0.05
IndivQLearningTabularSweepRedoSUNY/23_2_3	none	True	-10	True	GridWorld	SUNY	FullObsDiscrete	Individual_Q	1.0	0.05	2500000	3	True	IndivQLearningTabularSweepRedoSUNY/23_2_3_none	none	0.05
IndivQLearningTabularSweepRedoSUNY/24_2_4	none	True	-10	True	GridWorld	SUNY	FullObsDiscrete	Individual_Q	1.0	0.05	2500000	4	True	IndivQLearningTabularSweepRedoSUNY/24_2_4_centralized	centralized	0.05
IndivQLearningTabularSweepRedoSUNY/24_2_4	none	True	-10	True	GridWorld	SUNY	FullObsDiscrete	Individual_Q	1.0	0.05	2500000	4	True	IndivQLearningTabularSweepRedoSUNY/24_2_4_decentralized	decentralized	0.05
IndivQLearningTabularSweepRedoSUNY/24_2_4	none	True	-10	True	GridWorld	SUNY	FullObsDiscrete	Individual_Q	1.0	0.05	2500000	4	True	IndivQLearningTabularSweepRedoSUNY/24_2_4_none	none	0.05
IndivQLearningTabularSweepRedoSUNY/25_2_5	none	True	-10	True	GridWorld	SUNY	FullObsDiscrete	Individual_Q	1.0	0.05	2500000	5	True	IndivQLearningTabularSweepRedoSUNY/25_2_5_centralized	centralized	0.05
IndivQLearningTabularSweepRedoSUNY/25_2_5	none	True	-10	True	GridWorld	SUNY	FullObsDiscrete	Individual_Q	1.0	0.05	2500000	5	True	IndivQLearningTabularSweepRedoSUNY/25_2_5_decentralized	decentralized	0.05
IndivQLearningTabularSweepRedoSUNY/25_2_5	none	True	-10	True	GridWorld	SUNY	FullObsDiscrete	Individual_Q	1.0	0.05	2500000	5	True	IndivQLearningTabularSweepRedoSUNY/25_2_5_none	none	0.05
IndivQLearningTabularSweepRedoSUNY/26_2_6	none	True	-10	True	GridWorld	SUNY	FullObsDiscrete	Individual_Q	1.0	0.05	2500000	6	True	IndivQLearningTabularSweepRedoSUNY/26_2_6_centralized	centralized	0.05
IndivQLearningTabularSweepRedoSUNY/26_2_6	none	True	-10	True	GridWorld	SUNY	FullObsDiscrete	Individual_Q	1.0	0.05	2500000	6	True	IndivQLearningTabularSweepRedoSUNY/26_2_6_decentralized	decentralized	0.05
IndivQLearningTabularSweepRedoSUNY/26_2_6	none	True	-10	True	GridWorld	SUNY	FullObsDiscrete	Individual_Q	1.0	0.05	2500000	6	True	IndivQLearningTabularSweepRedoSUNY/26_2_6_none	none	0.05
IndivQLearningTabularSweepRedoSUNY/27_2_7	none	True	-10	True	GridWorld	SUNY	FullObsDiscrete	Individual_Q	1.0	0.05	2500000	7	True	IndivQLearningTabularSweepRedoSUNY/27_2_7_centralized	centralized	0.05
IndivQLearningTabularSweepRedoSUNY/27_2_7	none	True	-10	True	GridWorld	SUNY	FullObsDiscrete	Individual_Q	1.0	0.05	2500000	7	True	IndivQLearningTabularSweepRedoSUNY/27_2_7_decentralized	decentralized	0.05
IndivQLearningTabularSweepRedoSUNY/27_2_7	none	True	-10	True	GridWorld	SUNY	FullObsDiscrete	Individual_Q	1.0	0.05	2500000	7	True	IndivQLearningTabularSweepRedoSUNY/27_2_7_none	none	0.05
IndivQLearningTabularSweepRedoSUNY/28_2_8	none	True	-10	True	GridWorld	SUNY	FullObsDiscrete	Individual_Q	1.0	0.05	2500000	8	True	IndivQLearningTabularSweepRedoSUNY/28_2_8_centralized	centralized	0.05
IndivQLearningTabularSweepRedoSUNY/28_2_8	none	True	-10	True	GridWorld	SUNY	FullObsDiscrete	Individual_Q	1.0	0.05	2500000	8	True	IndivQLearningTabularSweepRedoSUNY/28_2_8_decentralized	decentralized	0.05
IndivQLearningTabularSweepRedoSUNY/28_2_8	none	True	-10	True	GridWorld	SUNY	FullObsDiscrete	Individual_Q	1.0	0.05	2500000	8	True	IndivQLearningTabularSweepRedoSUNY/28_2_8_none	none	0.05
IndivQLearningTabularSweepRedoSUNY/29_2_9	none	True	-10	True	GridWorld	SUNY	FullObsDiscrete	Individual_Q	1.0	0.05	2500000	9	True	IndivQLearningTabularSweepRedoSUNY/29_2_9_centralized	centralized	0.05
IndivQLearningTabularSweepRedoSUNY/29_2_9	none	True	-10	True	GridWorld	SUNY	FullObsDiscrete	Individual_Q	1.0	0.05	2500000	9	True	IndivQLearningTabularSweepRedoSUNY/29_2_9_decentralized	decentralized	0.05
IndivQLearningTabularSweepRedoSUNY/29_2_9	none	True	-10	True	GridWorld	SUNY	FullObsDiscrete	Individual_Q	1.0	0.05	2500000	9	True	IndivQLearningTabularSweepRedoSUNY/29_2_9_none	none	0.05
