# Supplementary material
Source: ML conference proceedings conference paper supplement (https://proceedings.neurips.cc/paper_files/paper/2022/hash/57444e14ecd9e2c8f603b4f012ce3811-Abstract.html)
Supplement: Supplementary file 1 [file 57444e14ecd9e2c8f603b4f012ce3811-Supplemental-Conference.zip › 3410_shield_decentralization_for_sa-Supplementary Material/parallel_configs/IndivQLearningTabularSweepTrain.csv]

run_name	shield	punish_unsafe_orig_action	punish_unsafe_orig_action_modifier	randomize_starts	map_type	grid_world_map_name	grid_world_obs_type	learner_type	learner_anneal_eps_start	learner_anneal_eps_finish	max_num_episodes	seed	skip_evaluation
IndivQLearningTabularSweep/0_0_0	centralized	True	-10	True	GridWorld	Pentagon	FullObsDiscrete	Individual_Q	1.0	0.05	1000	0	True
IndivQLearningTabularSweep/1_0_1	centralized	True	-10	True	GridWorld	Pentagon	FullObsDiscrete	Individual_Q	1.0	0.05	1000	1	True
IndivQLearningTabularSweep/2_0_2	centralized	True	-10	True	GridWorld	Pentagon	FullObsDiscrete	Individual_Q	1.0	0.05	1000	2	True
IndivQLearningTabularSweep/3_0_3	centralized	True	-10	True	GridWorld	Pentagon	FullObsDiscrete	Individual_Q	1.0	0.05	1000	3	True
IndivQLearningTabularSweep/4_0_4	centralized	True	-10	True	GridWorld	Pentagon	FullObsDiscrete	Individual_Q	1.0	0.05	1000	4	True
IndivQLearningTabularSweep/5_0_5	centralized	True	-10	True	GridWorld	Pentagon	FullObsDiscrete	Individual_Q	1.0	0.05	1000	5	True
IndivQLearningTabularSweep/6_0_6	centralized	True	-10	True	GridWorld	Pentagon	FullObsDiscrete	Individual_Q	1.0	0.05	1000	6	True
IndivQLearningTabularSweep/7_0_7	centralized	True	-10	True	GridWorld	Pentagon	FullObsDiscrete	Individual_Q	1.0	0.05	1000	7	True
IndivQLearningTabularSweep/8_0_8	centralized	True	-10	True	GridWorld	Pentagon	FullObsDiscrete	Individual_Q	1.0	0.05	1000	8	True
IndivQLearningTabularSweep/9_0_9	centralized	True	-10	True	GridWorld	Pentagon	FullObsDiscrete	Individual_Q	1.0	0.05	1000	9	True
IndivQLearningTabularSweep/10_1_0	decentralized	True	-10	True	GridWorld	Pentagon	FullObsDiscrete	Individual_Q	1.0	0.05	1000	0	True
IndivQLearningTabularSweep/11_1_1	decentralized	True	-10	True	GridWorld	Pentagon	FullObsDiscrete	Individual_Q	1.0	0.05	1000	1	True
IndivQLearningTabularSweep/12_1_2	decentralized	True	-10	True	GridWorld	Pentagon	FullObsDiscrete	Individual_Q	1.0	0.05	1000	2	True
IndivQLearningTabularSweep/13_1_3	decentralized	True	-10	True	GridWorld	Pentagon	FullObsDiscrete	Individual_Q	1.0	0.05	1000	3	True
IndivQLearningTabularSweep/14_1_4	decentralized	True	-10	True	GridWorld	Pentagon	FullObsDiscrete	Individual_Q	1.0	0.05	1000	4	True
IndivQLearningTabularSweep/15_1_5	decentralized	True	-10	True	GridWorld	Pentagon	FullObsDiscrete	Individual_Q	1.0	0.05	1000	5	True
IndivQLearningTabularSweep/16_1_6	decentralized	True	-10	True	GridWorld	Pentagon	FullObsDiscrete	Individual_Q	1.0	0.05	1000	6	True
IndivQLearningTabularSweep/17_1_7	decentralized	True	-10	True	GridWorld	Pentagon	FullObsDiscrete	Individual_Q	1.0	0.05	1000	7	True
IndivQLearningTabularSweep/18_1_8	decentralized	True	-10	True	GridWorld	Pentagon	FullObsDiscrete	Individual_Q	1.0	0.05	1000	8	True
IndivQLearningTabularSweep/19_1_9	decentralized	True	-10	True	GridWorld	Pentagon	FullObsDiscrete	Individual_Q	1.0	0.05	1000	9	True
IndivQLearningTabularSweep/20_2_0	none	True	-10	True	GridWorld	Pentagon	FullObsDiscrete	Individual_Q	1.0	0.05	1000	0	True
IndivQLearningTabularSweep/21_2_1	none	True	-10	True	GridWorld	Pentagon	FullObsDiscrete	Individual_Q	1.0	0.05	1000	1	True
IndivQLearningTabularSweep/22_2_2	none	True	-10	True	GridWorld	Pentagon	FullObsDiscrete	Individual_Q	1.0	0.05	1000	2	True
IndivQLearningTabularSweep/23_2_3	none	True	-10	True	GridWorld	Pentagon	FullObsDiscrete	Individual_Q	1.0	0.05	1000	3	True
IndivQLearningTabularSweep/24_2_4	none	True	-10	True	GridWorld	Pentagon	FullObsDiscrete	Individual_Q	1.0	0.05	1000	4	True
IndivQLearningTabularSweep/25_2_5	none	True	-10	True	GridWorld	Pentagon	FullObsDiscrete	Individual_Q	1.0	0.05	1000	5	True
IndivQLearningTabularSweep/26_2_6	none	True	-10	True	GridWorld	Pentagon	FullObsDiscrete	Individual_Q	1.0	0.05	1000	6	True
IndivQLearningTabularSweep/27_2_7	none	True	-10	True	GridWorld	Pentagon	FullObsDiscrete	Individual_Q	1.0	0.05	1000	7	True
IndivQLearningTabularSweep/28_2_8	none	True	-10	True	GridWorld	Pentagon	FullObsDiscrete	Individual_Q	1.0	0.05	1000	8	True
IndivQLearningTabularSweep/29_2_9	none	True	-10	True	GridWorld	Pentagon	FullObsDiscrete	Individual_Q	1.0	0.05	1000	9	True
IndivQLearningTabularSweep/30_3_0	centralized	True	-10	False	GridWorld	Pentagon	FullObsDiscrete	Individual_Q	1.0	0.05	1000	0	True
IndivQLearningTabularSweep/31_3_1	centralized	True	-10	False	GridWorld	Pentagon	FullObsDiscrete	Individual_Q	1.0	0.05	1000	1	True
IndivQLearningTabularSweep/32_3_2	centralized	True	-10	False	GridWorld	Pentagon	FullObsDiscrete	Individual_Q	1.0	0.05	1000	2	True
IndivQLearningTabularSweep/33_3_3	centralized	True	-10	False	GridWorld	Pentagon	FullObsDiscrete	Individual_Q	1.0	0.05	1000	3	True
IndivQLearningTabularSweep/34_3_4	centralized	True	-10	False	GridWorld	Pentagon	FullObsDiscrete	Individual_Q	1.0	0.05	1000	4	True
IndivQLearningTabularSweep/35_3_5	centralized	True	-10	False	GridWorld	Pentagon	FullObsDiscrete	Individual_Q	1.0	0.05	1000	5	True
IndivQLearningTabularSweep/36_3_6	centralized	True	-10	False	GridWorld	Pentagon	FullObsDiscrete	Individual_Q	1.0	0.05	1000	6	True
IndivQLearningTabularSweep/37_3_7	centralized	True	-10	False	GridWorld	Pentagon	FullObsDiscrete	Individual_Q	1.0	0.05	1000	7	True
IndivQLearningTabularSweep/38_3_8	centralized	True	-10	False	GridWorld	Pentagon	FullObsDiscrete	Individual_Q	1.0	0.05	1000	8	True
IndivQLearningTabularSweep/39_3_9	centralized	True	-10	False	GridWorld	Pentagon	FullObsDiscrete	Individual_Q	1.0	0.05	1000	9	True
IndivQLearningTabularSweep/40_4_0	decentralized	True	-10	False	GridWorld	Pentagon	FullObsDiscrete	Individual_Q	1.0	0.05	1000	0	True
IndivQLearningTabularSweep/41_4_1	decentralized	True	-10	False	GridWorld	Pentagon	FullObsDiscrete	Individual_Q	1.0	0.05	1000	1	True
IndivQLearningTabularSweep/42_4_2	decentralized	True	-10	False	GridWorld	Pentagon	FullObsDiscrete	Individual_Q	1.0	0.05	1000	2	True
IndivQLearningTabularSweep/43_4_3	decentralized	True	-10	False	GridWorld	Pentagon	FullObsDiscrete	Individual_Q	1.0	0.05	1000	3	True
IndivQLearningTabularSweep/44_4_4	decentralized	True	-10	False	GridWorld	Pentagon	FullObsDiscrete	Individual_Q	1.0	0.05	1000	4	True
IndivQLearningTabularSweep/45_4_5	decentralized	True	-10	False	GridWorld	Pentagon	FullObsDiscrete	Individual_Q	1.0	0.05	1000	5	True
IndivQLearningTabularSweep/46_4_6	decentralized	True	-10	False	GridWorld	Pentagon	FullObsDiscrete	Individual_Q	1.0	0.05	1000	6	True
IndivQLearningTabularSweep/47_4_7	decentralized	True	-10	False	GridWorld	Pentagon	FullObsDiscrete	Individual_Q	1.0	0.05	1000	7	True
IndivQLearningTabularSweep/48_4_8	decentralized	True	-10	False	GridWorld	Pentagon	FullObsDiscrete	Individual_Q	1.0	0.05	1000	8	True
IndivQLearningTabularSweep/49_4_9	decentralized	True	-10	False	GridWorld	Pentagon	FullObsDiscrete	Individual_Q	1.0	0.05	1000	9	True
IndivQLearningTabularSweep/50_5_0	none	True	-10	False	GridWorld	Pentagon	FullObsDiscrete	Individual_Q	1.0	0.05	1000	0	True
IndivQLearningTabularSweep/51_5_1	none	True	-10	False	GridWorld	Pentagon	FullObsDiscrete	Individual_Q	1.0	0.05	1000	1	True
IndivQLearningTabularSweep/52_5_2	none	True	-10	False	GridWorld	Pentagon	FullObsDiscrete	Individual_Q	1.0	0.05	1000	2	True
IndivQLearningTabularSweep/53_5_3	none	True	-10	False	GridWorld	Pentagon	FullObsDiscrete	Individual_Q	1.0	0.05	1000	3	True
IndivQLearningTabularSweep/54_5_4	none	True	-10	False	GridWorld	Pentagon	FullObsDiscrete	Individual_Q	1.0	0.05	1000	4	True
IndivQLearningTabularSweep/55_5_5	none	True	-10	False	GridWorld	Pentagon	FullObsDiscrete	Individual_Q	1.0	0.05	1000	5	True
IndivQLearningTabularSweep/56_5_6	none	True	-10	False	GridWorld	Pentagon	FullObsDiscrete	Individual_Q	1.0	0.05	1000	6	True
IndivQLearningTabularSweep/57_5_7	none	True	-10	False	GridWorld	Pentagon	FullObsDiscrete	Individual_Q	1.0	0.05	1000	7	True
IndivQLearningTabularSweep/58_5_8	none	True	-10	False	GridWorld	Pentagon	FullObsDiscrete	Individual_Q	1.0	0.05	1000	8	True
IndivQLearningTabularSweep/59_5_9	none	True	-10	False	GridWorld	Pentagon	FullObsDiscrete	Individual_Q	1.0	0.05	1000	9	True
IndivQLearningTabularSweep/60_6_0	centralized	True	-10	True	GridWorld	ISR	FullObsDiscrete	Individual_Q	1.0	0.05	1000	0	True
IndivQLearningTabularSweep/61_6_1	centralized	True	-10	True	GridWorld	ISR	FullObsDiscrete	Individual_Q	1.0	0.05	1000	1	True
IndivQLearningTabularSweep/62_6_2	centralized	True	-10	True	GridWorld	ISR	FullObsDiscrete	Individual_Q	1.0	0.05	1000	2	True
IndivQLearningTabularSweep/63_6_3	centralized	True	-10	True	GridWorld	ISR	FullObsDiscrete	Individual_Q	1.0	0.05	1000	3	True
IndivQLearningTabularSweep/64_6_4	centralized	True	-10	True	GridWorld	ISR	FullObsDiscrete	Individual_Q	1.0	0.05	1000	4	True
IndivQLearningTabularSweep/65_6_5	centralized	True	-10	True	GridWorld	ISR	FullObsDiscrete	Individual_Q	1.0	0.05	1000	5	True
IndivQLearningTabularSweep/66_6_6	centralized	True	-10	True	GridWorld	ISR	FullObsDiscrete	Individual_Q	1.0	0.05	1000	6	True
IndivQLearningTabularSweep/67_6_7	centralized	True	-10	True	GridWorld	ISR	FullObsDiscrete	Individual_Q	1.0	0.05	1000	7	True
IndivQLearningTabularSweep/68_6_8	centralized	True	-10	True	GridWorld	ISR	FullObsDiscrete	Individual_Q	1.0	0.05	1000	8	True
IndivQLearningTabularSweep/69_6_9	centralized	True	-10	True	GridWorld	ISR	FullObsDiscrete	Individual_Q	1.0	0.05	1000	9	True
IndivQLearningTabularSweep/70_7_0	decentralized	True	-10	True	GridWorld	ISR	FullObsDiscrete	Individual_Q	1.0	0.05	1000	0	True
IndivQLearningTabularSweep/71_7_1	decentralized	True	-10	True	GridWorld	ISR	FullObsDiscrete	Individual_Q	1.0	0.05	1000	1	True
IndivQLearningTabularSweep/72_7_2	decentralized	True	-10	True	GridWorld	ISR	FullObsDiscrete	Individual_Q	1.0	0.05	1000	2	True
IndivQLearningTabularSweep/73_7_3	decentralized	True	-10	True	GridWorld	ISR	FullObsDiscrete	Individual_Q	1.0	0.05	1000	3	True
IndivQLearningTabularSweep/74_7_4	decentralized	True	-10	True	GridWorld	ISR	FullObsDiscrete	Individual_Q	1.0	0.05	1000	4	True
IndivQLearningTabularSweep/75_7_5	decentralized	True	-10	True	GridWorld	ISR	FullObsDiscrete	Individual_Q	1.0	0.05	1000	5	True
IndivQLearningTabularSweep/76_7_6	decentralized	True	-10	True	GridWorld	ISR	FullObsDiscrete	Individual_Q	1.0	0.05	1000	6	True
IndivQLearningTabularSweep/77_7_7	decentralized	True	-10	True	GridWorld	ISR	FullObsDiscrete	Individual_Q	1.0	0.05	1000	7	True
IndivQLearningTabularSweep/78_7_8	decentralized	True	-10	True	GridWorld	ISR	FullObsDiscrete	Individual_Q	1.0	0.05	1000	8	True
IndivQLearningTabularSweep/79_7_9	decentralized	True	-10	True	GridWorld	ISR	FullObsDiscrete	Individual_Q	1.0	0.05	1000	9	True
IndivQLearningTabularSweep/80_8_0	none	True	-10	True	GridWorld	ISR	FullObsDiscrete	Individual_Q	1.0	0.05	1000	0	True
IndivQLearningTabularSweep/81_8_1	none	True	-10	True	GridWorld	ISR	FullObsDiscrete	Individual_Q	1.0	0.05	1000	1	True
IndivQLearningTabularSweep/82_8_2	none	True	-10	True	GridWorld	ISR	FullObsDiscrete	Individual_Q	1.0	0.05	1000	2	True
IndivQLearningTabularSweep/83_8_3	none	True	-10	True	GridWorld	ISR	FullObsDiscrete	Individual_Q	1.0	0.05	1000	3	True
IndivQLearningTabularSweep/84_8_4	none	True	-10	True	GridWorld	ISR	FullObsDiscrete	Individual_Q	1.0	0.05	1000	4	True
IndivQLearningTabularSweep/85_8_5	none	True	-10	True	GridWorld	ISR	FullObsDiscrete	Individual_Q	1.0	0.05	1000	5	True
IndivQLearningTabularSweep/86_8_6	none	True	-10	True	GridWorld	ISR	FullObsDiscrete	Individual_Q	1.0	0.05	1000	6	True
IndivQLearningTabularSweep/87_8_7	none	True	-10	True	GridWorld	ISR	FullObsDiscrete	Individual_Q	1.0	0.05	1000	7	True
IndivQLearningTabularSweep/88_8_8	none	True	-10	True	GridWorld	ISR	FullObsDiscrete	Individual_Q	1.0	0.05	1000	8	True
IndivQLearningTabularSweep/89_8_9	none	True	-10	True	GridWorld	ISR	FullObsDiscrete	Individual_Q	1.0	0.05	1000	9	True
IndivQLearningTabularSweep/90_9_0	centralized	True	-10	False	GridWorld	ISR	FullObsDiscrete	Individual_Q	1.0	0.05	1000	0	True
IndivQLearningTabularSweep/91_9_1	centralized	True	-10	False	GridWorld	ISR	FullObsDiscrete	Individual_Q	1.0	0.05	1000	1	True
IndivQLearningTabularSweep/92_9_2	centralized	True	-10	False	GridWorld	ISR	FullObsDiscrete	Individual_Q	1.0	0.05	1000	2	True
IndivQLearningTabularSweep/93_9_3	centralized	True	-10	False	GridWorld	ISR	FullObsDiscrete	Individual_Q	1.0	0.05	1000	3	True
IndivQLearningTabularSweep/94_9_4	centralized	True	-10	False	GridWorld	ISR	FullObsDiscrete	Individual_Q	1.0	0.05	1000	4	True
IndivQLearningTabularSweep/95_9_5	centralized	True	-10	False	GridWorld	ISR	FullObsDiscrete	Individual_Q	1.0	0.05	1000	5	True
IndivQLearningTabularSweep/96_9_6	centralized	True	-10	False	GridWorld	ISR	FullObsDiscrete	Individual_Q	1.0	0.05	1000	6	True
IndivQLearningTabularSweep/97_9_7	centralized	True	-10	False	GridWorld	ISR	FullObsDiscrete	Individual_Q	1.0	0.05	1000	7	True
IndivQLearningTabularSweep/98_9_8	centralized	True	-10	False	GridWorld	ISR	FullObsDiscrete	Individual_Q	1.0	0.05	1000	8	True
IndivQLearningTabularSweep/99_9_9	centralized	True	-10	False	GridWorld	ISR	FullObsDiscrete	Individual_Q	1.0	0.05	1000	9	True
IndivQLearningTabularSweep/100_10_0	decentralized	True	-10	False	GridWorld	ISR	FullObsDiscrete	Individual_Q	1.0	0.05	1000	0	True
IndivQLearningTabularSweep/101_10_1	decentralized	True	-10	False	GridWorld	ISR	FullObsDiscrete	Individual_Q	1.0	0.05	1000	1	True
IndivQLearningTabularSweep/102_10_2	decentralized	True	-10	False	GridWorld	ISR	FullObsDiscrete	Individual_Q	1.0	0.05	1000	2	True
IndivQLearningTabularSweep/103_10_3	decentralized	True	-10	False	GridWorld	ISR	FullObsDiscrete	Individual_Q	1.0	0.05	1000	3	True
IndivQLearningTabularSweep/104_10_4	decentralized	True	-10	False	GridWorld	ISR	FullObsDiscrete	Individual_Q	1.0	0.05	1000	4	True
IndivQLearningTabularSweep/105_10_5	decentralized	True	-10	False	GridWorld	ISR	FullObsDiscrete	Individual_Q	1.0	0.05	1000	5	True
IndivQLearningTabularSweep/106_10_6	decentralized	True	-10	False	GridWorld	ISR	FullObsDiscrete	Individual_Q	1.0	0.05	1000	6	True
IndivQLearningTabularSweep/107_10_7	decentralized	True	-10	False	GridWorld	ISR	FullObsDiscrete	Individual_Q	1.0	0.05	1000	7	True
IndivQLearningTabularSweep/108_10_8	decentralized	True	-10	False	GridWorld	ISR	FullObsDiscrete	Individual_Q	1.0	0.05	1000	8	True
IndivQLearningTabularSweep/109_10_9	decentralized	True	-10	False	GridWorld	ISR	FullObsDiscrete	Individual_Q	1.0	0.05	1000	9	True
IndivQLearningTabularSweep/110_11_0	none	True	-10	False	GridWorld	ISR	FullObsDiscrete	Individual_Q	1.0	0.05	1000	0	True
IndivQLearningTabularSweep/111_11_1	none	True	-10	False	GridWorld	ISR	FullObsDiscrete	Individual_Q	1.0	0.05	1000	1	True
IndivQLearningTabularSweep/112_11_2	none	True	-10	False	GridWorld	ISR	FullObsDiscrete	Individual_Q	1.0	0.05	1000	2	True
IndivQLearningTabularSweep/113_11_3	none	True	-10	False	GridWorld	ISR	FullObsDiscrete	Individual_Q	1.0	0.05	1000	3	True
IndivQLearningTabularSweep/114_11_4	none	True	-10	False	GridWorld	ISR	FullObsDiscrete	Individual_Q	1.0	0.05	1000	4	True
IndivQLearningTabularSweep/115_11_5	none	True	-10	False	GridWorld	ISR	FullObsDiscrete	Individual_Q	1.0	0.05	1000	5	True
IndivQLearningTabularSweep/116_11_6	none	True	-10	False	GridWorld	ISR	FullObsDiscrete	Individual_Q	1.0	0.05	1000	6	True
IndivQLearningTabularSweep/117_11_7	none	True	-10	False	GridWorld	ISR	FullObsDiscrete	Individual_Q	1.0	0.05	1000	7	True
IndivQLearningTabularSweep/118_11_8	none	True	-10	False	GridWorld	ISR	FullObsDiscrete	Individual_Q	1.0	0.05	1000	8	True
IndivQLearningTabularSweep/119_11_9	none	True	-10	False	GridWorld	ISR	FullObsDiscrete	Individual_Q	1.0	0.05	1000	9	True
IndivQLearningTabularSweep/120_12_0	centralized	True	-10	True	GridWorld	SUNY	FullObsDiscrete	Individual_Q	1.0	0.05	1000	0	True
IndivQLearningTabularSweep/121_12_1	centralized	True	-10	True	GridWorld	SUNY	FullObsDiscrete	Individual_Q	1.0	0.05	1000	1	True
IndivQLearningTabularSweep/122_12_2	centralized	True	-10	True	GridWorld	SUNY	FullObsDiscrete	Individual_Q	1.0	0.05	1000	2	True
IndivQLearningTabularSweep/123_12_3	centralized	True	-10	True	GridWorld	SUNY	FullObsDiscrete	Individual_Q	1.0	0.05	1000	3	True
IndivQLearningTabularSweep/124_12_4	centralized	True	-10	True	GridWorld	SUNY	FullObsDiscrete	Individual_Q	1.0	0.05	1000	4	True
IndivQLearningTabularSweep/125_12_5	centralized	True	-10	True	GridWorld	SUNY	FullObsDiscrete	Individual_Q	1.0	0.05	1000	5	True
IndivQLearningTabularSweep/126_12_6	centralized	True	-10	True	GridWorld	SUNY	FullObsDiscrete	Individual_Q	1.0	0.05	1000	6	True
IndivQLearningTabularSweep/127_12_7	centralized	True	-10	True	GridWorld	SUNY	FullObsDiscrete	Individual_Q	1.0	0.05	1000	7	True
IndivQLearningTabularSweep/128_12_8	centralized	True	-10	True	GridWorld	SUNY	FullObsDiscrete	Individual_Q	1.0	0.05	1000	8	True
IndivQLearningTabularSweep/129_12_9	centralized	True	-10	True	GridWorld	SUNY	FullObsDiscrete	Individual_Q	1.0	0.05	1000	9	True
IndivQLearningTabularSweep/130_13_0	decentralized	True	-10	True	GridWorld	SUNY	FullObsDiscrete	Individual_Q	1.0	0.05	1000	0	True
IndivQLearningTabularSweep/131_13_1	decentralized	True	-10	True	GridWorld	SUNY	FullObsDiscrete	Individual_Q	1.0	0.05	1000	1	True
IndivQLearningTabularSweep/132_13_2	decentralized	True	-10	True	GridWorld	SUNY	FullObsDiscrete	Individual_Q	1.0	0.05	1000	2	True
IndivQLearningTabularSweep/133_13_3	decentralized	True	-10	True	GridWorld	SUNY	FullObsDiscrete	Individual_Q	1.0	0.05	1000	3	True
IndivQLearningTabularSweep/134_13_4	decentralized	True	-10	True	GridWorld	SUNY	FullObsDiscrete	Individual_Q	1.0	0.05	1000	4	True
IndivQLearningTabularSweep/135_13_5	decentralized	True	-10	True	GridWorld	SUNY	FullObsDiscrete	Individual_Q	1.0	0.05	1000	5	True
IndivQLearningTabularSweep/136_13_6	decentralized	True	-10	True	GridWorld	SUNY	FullObsDiscrete	Individual_Q	1.0	0.05	1000	6	True
IndivQLearningTabularSweep/137_13_7	decentralized	True	-10	True	GridWorld	SUNY	FullObsDiscrete	Individual_Q	1.0	0.05	1000	7	True
IndivQLearningTabularSweep/138_13_8	decentralized	True	-10	True	GridWorld	SUNY	FullObsDiscrete	Individual_Q	1.0	0.05	1000	8	True
IndivQLearningTabularSweep/139_13_9	decentralized	True	-10	True	GridWorld	SUNY	FullObsDiscrete	Individual_Q	1.0	0.05	1000	9	True
IndivQLearningTabularSweep/140_14_0	none	True	-10	True	GridWorld	SUNY	FullObsDiscrete	Individual_Q	1.0	0.05	1000	0	True
IndivQLearningTabularSweep/141_14_1	none	True	-10	True	GridWorld	SUNY	FullObsDiscrete	Individual_Q	1.0	0.05	1000	1	True
IndivQLearningTabularSweep/142_14_2	none	True	-10	True	GridWorld	SUNY	FullObsDiscrete	Individual_Q	1.0	0.05	1000	2	True
IndivQLearningTabularSweep/143_14_3	none	True	-10	True	GridWorld	SUNY	FullObsDiscrete	Individual_Q	1.0	0.05	1000	3	True
IndivQLearningTabularSweep/144_14_4	none	True	-10	True	GridWorld	SUNY	FullObsDiscrete	Individual_Q	1.0	0.05	1000	4	True
IndivQLearningTabularSweep/145_14_5	none	True	-10	True	GridWorld	SUNY	FullObsDiscrete	Individual_Q	1.0	0.05	1000	5	True
IndivQLearningTabularSweep/146_14_6	none	True	-10	True	GridWorld	SUNY	FullObsDiscrete	Individual_Q	1.0	0.05	1000	6	True
IndivQLearningTabularSweep/147_14_7	none	True	-10	True	GridWorld	SUNY	FullObsDiscrete	Individual_Q	1.0	0.05	1000	7	True
IndivQLearningTabularSweep/148_14_8	none	True	-10	True	GridWorld	SUNY	FullObsDiscrete	Individual_Q	1.0	0.05	1000	8	True
IndivQLearningTabularSweep/149_14_9	none	True	-10	True	GridWorld	SUNY	FullObsDiscrete	Individual_Q	1.0	0.05	1000	9	True
IndivQLearningTabularSweep/150_15_0	centralized	True	-10	False	GridWorld	SUNY	FullObsDiscrete	Individual_Q	1.0	0.05	1000	0	True
IndivQLearningTabularSweep/151_15_1	centralized	True	-10	False	GridWorld	SUNY	FullObsDiscrete	Individual_Q	1.0	0.05	1000	1	True
IndivQLearningTabularSweep/152_15_2	centralized	True	-10	False	GridWorld	SUNY	FullObsDiscrete	Individual_Q	1.0	0.05	1000	2	True
IndivQLearningTabularSweep/153_15_3	centralized	True	-10	False	GridWorld	SUNY	FullObsDiscrete	Individual_Q	1.0	0.05	1000	3	True
IndivQLearningTabularSweep/154_15_4	centralized	True	-10	False	GridWorld	SUNY	FullObsDiscrete	Individual_Q	1.0	0.05	1000	4	True
IndivQLearningTabularSweep/155_15_5	centralized	True	-10	False	GridWorld	SUNY	FullObsDiscrete	Individual_Q	1.0	0.05	1000	5	True
IndivQLearningTabularSweep/156_15_6	centralized	True	-10	False	GridWorld	SUNY	FullObsDiscrete	Individual_Q	1.0	0.05	1000	6	True
IndivQLearningTabularSweep/157_15_7	centralized	True	-10	False	GridWorld	SUNY	FullObsDiscrete	Individual_Q	1.0	0.05	1000	7	True
IndivQLearningTabularSweep/158_15_8	centralized	True	-10	False	GridWorld	SUNY	FullObsDiscrete	Individual_Q	1.0	0.05	1000	8	True
IndivQLearningTabularSweep/159_15_9	centralized	True	-10	False	GridWorld	SUNY	FullObsDiscrete	Individual_Q	1.0	0.05	1000	9	True
IndivQLearningTabularSweep/160_16_0	decentralized	True	-10	False	GridWorld	SUNY	FullObsDiscrete	Individual_Q	1.0	0.05	1000	0	True
IndivQLearningTabularSweep/161_16_1	decentralized	True	-10	False	GridWorld	SUNY	FullObsDiscrete	Individual_Q	1.0	0.05	1000	1	True
IndivQLearningTabularSweep/162_16_2	decentralized	True	-10	False	GridWorld	SUNY	FullObsDiscrete	Individual_Q	1.0	0.05	1000	2	True
IndivQLearningTabularSweep/163_16_3	decentralized	True	-10	False	GridWorld	SUNY	FullObsDiscrete	Individual_Q	1.0	0.05	1000	3	True
IndivQLearningTabularSweep/164_16_4	decentralized	True	-10	False	GridWorld	SUNY	FullObsDiscrete	Individual_Q	1.0	0.05	1000	4	True
IndivQLearningTabularSweep/165_16_5	decentralized	True	-10	False	GridWorld	SUNY	FullObsDiscrete	Individual_Q	1.0	0.05	1000	5	True
IndivQLearningTabularSweep/166_16_6	decentralized	True	-10	False	GridWorld	SUNY	FullObsDiscrete	Individual_Q	1.0	0.05	1000	6	True
IndivQLearningTabularSweep/167_16_7	decentralized	True	-10	False	GridWorld	SUNY	FullObsDiscrete	Individual_Q	1.0	0.05	1000	7	True
IndivQLearningTabularSweep/168_16_8	decentralized	True	-10	False	GridWorld	SUNY	FullObsDiscrete	Individual_Q	1.0	0.05	1000	8	True
IndivQLearningTabularSweep/169_16_9	decentralized	True	-10	False	GridWorld	SUNY	FullObsDiscrete	Individual_Q	1.0	0.05	1000	9	True
IndivQLearningTabularSweep/170_17_0	none	True	-10	False	GridWorld	SUNY	FullObsDiscrete	Individual_Q	1.0	0.05	1000	0	True
IndivQLearningTabularSweep/171_17_1	none	True	-10	False	GridWorld	SUNY	FullObsDiscrete	Individual_Q	1.0	0.05	1000	1	True
IndivQLearningTabularSweep/172_17_2	none	True	-10	False	GridWorld	SUNY	FullObsDiscrete	Individual_Q	1.0	0.05	1000	2	True
IndivQLearningTabularSweep/173_17_3	none	True	-10	False	GridWorld	SUNY	FullObsDiscrete	Individual_Q	1.0	0.05	1000	3	True
IndivQLearningTabularSweep/174_17_4	none	True	-10	False	GridWorld	SUNY	FullObsDiscrete	Individual_Q	1.0	0.05	1000	4	True
IndivQLearningTabularSweep/175_17_5	none	True	-10	False	GridWorld	SUNY	FullObsDiscrete	Individual_Q	1.0	0.05	1000	5	True
IndivQLearningTabularSweep/176_17_6	none	True	-10	False	GridWorld	SUNY	FullObsDiscrete	Individual_Q	1.0	0.05	1000	6	True
IndivQLearningTabularSweep/177_17_7	none	True	-10	False	GridWorld	SUNY	FullObsDiscrete	Individual_Q	1.0	0.05	1000	7	True
IndivQLearningTabularSweep/178_17_8	none	True	-10	False	GridWorld	SUNY	FullObsDiscrete	Individual_Q	1.0	0.05	1000	8	True
IndivQLearningTabularSweep/179_17_9	none	True	-10	False	GridWorld	SUNY	FullObsDiscrete	Individual_Q	1.0	0.05	1000	9	True
IndivQLearningTabularSweep/180_18_0	centralized	True	-10	True	GridWorld	MIT	FullObsDiscrete	Individual_Q	1.0	0.05	1000	0	True
IndivQLearningTabularSweep/181_18_1	centralized	True	-10	True	GridWorld	MIT	FullObsDiscrete	Individual_Q	1.0	0.05	1000	1	True
IndivQLearningTabularSweep/182_18_2	centralized	True	-10	True	GridWorld	MIT	FullObsDiscrete	Individual_Q	1.0	0.05	1000	2	True
IndivQLearningTabularSweep/183_18_3	centralized	True	-10	True	GridWorld	MIT	FullObsDiscrete	Individual_Q	1.0	0.05	1000	3	True
IndivQLearningTabularSweep/184_18_4	centralized	True	-10	True	GridWorld	MIT	FullObsDiscrete	Individual_Q	1.0	0.05	1000	4	True
IndivQLearningTabularSweep/185_18_5	centralized	True	-10	True	GridWorld	MIT	FullObsDiscrete	Individual_Q	1.0	0.05	1000	5	True
IndivQLearningTabularSweep/186_18_6	centralized	True	-10	True	GridWorld	MIT	FullObsDiscrete	Individual_Q	1.0	0.05	1000	6	True
IndivQLearningTabularSweep/187_18_7	centralized	True	-10	True	GridWorld	MIT	FullObsDiscrete	Individual_Q	1.0	0.05	1000	7	True
IndivQLearningTabularSweep/188_18_8	centralized	True	-10	True	GridWorld	MIT	FullObsDiscrete	Individual_Q	1.0	0.05	1000	8	True
IndivQLearningTabularSweep/189_18_9	centralized	True	-10	True	GridWorld	MIT	FullObsDiscrete	Individual_Q	1.0	0.05	1000	9	True
IndivQLearningTabularSweep/190_19_0	decentralized	True	-10	True	GridWorld	MIT	FullObsDiscrete	Individual_Q	1.0	0.05	1000	0	True
IndivQLearningTabularSweep/191_19_1	decentralized	True	-10	True	GridWorld	MIT	FullObsDiscrete	Individual_Q	1.0	0.05	1000	1	True
IndivQLearningTabularSweep/192_19_2	decentralized	True	-10	True	GridWorld	MIT	FullObsDiscrete	Individual_Q	1.0	0.05	1000	2	True
IndivQLearningTabularSweep/193_19_3	decentralized	True	-10	True	GridWorld	MIT	FullObsDiscrete	Individual_Q	1.0	0.05	1000	3	True
IndivQLearningTabularSweep/194_19_4	decentralized	True	-10	True	GridWorld	MIT	FullObsDiscrete	Individual_Q	1.0	0.05	1000	4	True
IndivQLearningTabularSweep/195_19_5	decentralized	True	-10	True	GridWorld	MIT	FullObsDiscrete	Individual_Q	1.0	0.05	1000	5	True
IndivQLearningTabularSweep/196_19_6	decentralized	True	-10	True	GridWorld	MIT	FullObsDiscrete	Individual_Q	1.0	0.05	1000	6	True
IndivQLearningTabularSweep/197_19_7	decentralized	True	-10	True	GridWorld	MIT	FullObsDiscrete	Individual_Q	1.0	0.05	1000	7	True
IndivQLearningTabularSweep/198_19_8	decentralized	True	-10	True	GridWorld	MIT	FullObsDiscrete	Individual_Q	1.0	0.05	1000	8	True
IndivQLearningTabularSweep/199_19_9	decentralized	True	-10	True	GridWorld	MIT	FullObsDiscrete	Individual_Q	1.0	0.05	1000	9	True
IndivQLearningTabularSweep/200_20_0	none	True	-10	True	GridWorld	MIT	FullObsDiscrete	Individual_Q	1.0	0.05	1000	0	True
IndivQLearningTabularSweep/201_20_1	none	True	-10	True	GridWorld	MIT	FullObsDiscrete	Individual_Q	1.0	0.05	1000	1	True
IndivQLearningTabularSweep/202_20_2	none	True	-10	True	GridWorld	MIT	FullObsDiscrete	Individual_Q	1.0	0.05	1000	2	True
IndivQLearningTabularSweep/203_20_3	none	True	-10	True	GridWorld	MIT	FullObsDiscrete	Individual_Q	1.0	0.05	1000	3	True
IndivQLearningTabularSweep/204_20_4	none	True	-10	True	GridWorld	MIT	FullObsDiscrete	Individual_Q	1.0	0.05	1000	4	True
IndivQLearningTabularSweep/205_20_5	none	True	-10	True	GridWorld	MIT	FullObsDiscrete	Individual_Q	1.0	0.05	1000	5	True
IndivQLearningTabularSweep/206_20_6	none	True	-10	True	GridWorld	MIT	FullObsDiscrete	Individual_Q	1.0	0.05	1000	6	True
IndivQLearningTabularSweep/207_20_7	none	True	-10	True	GridWorld	MIT	FullObsDiscrete	Individual_Q	1.0	0.05	1000	7	True
IndivQLearningTabularSweep/208_20_8	none	True	-10	True	GridWorld	MIT	FullObsDiscrete	Individual_Q	1.0	0.05	1000	8	True
IndivQLearningTabularSweep/209_20_9	none	True	-10	True	GridWorld	MIT	FullObsDiscrete	Individual_Q	1.0	0.05	1000	9	True
IndivQLearningTabularSweep/210_21_0	centralized	True	-10	False	GridWorld	MIT	FullObsDiscrete	Individual_Q	1.0	0.05	1000	0	True
IndivQLearningTabularSweep/211_21_1	centralized	True	-10	False	GridWorld	MIT	FullObsDiscrete	Individual_Q	1.0	0.05	1000	1	True
IndivQLearningTabularSweep/212_21_2	centralized	True	-10	False	GridWorld	MIT	FullObsDiscrete	Individual_Q	1.0	0.05	1000	2	True
IndivQLearningTabularSweep/213_21_3	centralized	True	-10	False	GridWorld	MIT	FullObsDiscrete	Individual_Q	1.0	0.05	1000	3	True
IndivQLearningTabularSweep/214_21_4	centralized	True	-10	False	GridWorld	MIT	FullObsDiscrete	Individual_Q	1.0	0.05	1000	4	True
IndivQLearningTabularSweep/215_21_5	centralized	True	-10	False	GridWorld	MIT	FullObsDiscrete	Individual_Q	1.0	0.05	1000	5	True
IndivQLearningTabularSweep/216_21_6	centralized	True	-10	False	GridWorld	MIT	FullObsDiscrete	Individual_Q	1.0	0.05	1000	6	True
IndivQLearningTabularSweep/217_21_7	centralized	True	-10	False	GridWorld	MIT	FullObsDiscrete	Individual_Q	1.0	0.05	1000	7	True
IndivQLearningTabularSweep/218_21_8	centralized	True	-10	False	GridWorld	MIT	FullObsDiscrete	Individual_Q	1.0	0.05	1000	8	True
IndivQLearningTabularSweep/219_21_9	centralized	True	-10	False	GridWorld	MIT	FullObsDiscrete	Individual_Q	1.0	0.05	1000	9	True
IndivQLearningTabularSweep/220_22_0	decentralized	True	-10	False	GridWorld	MIT	FullObsDiscrete	Individual_Q	1.0	0.05	1000	0	True
IndivQLearningTabularSweep/221_22_1	decentralized	True	-10	False	GridWorld	MIT	FullObsDiscrete	Individual_Q	1.0	0.05	1000	1	True
IndivQLearningTabularSweep/222_22_2	decentralized	True	-10	False	GridWorld	MIT	FullObsDiscrete	Individual_Q	1.0	0.05	1000	2	True
IndivQLearningTabularSweep/223_22_3	decentralized	True	-10	False	GridWorld	MIT	FullObsDiscrete	Individual_Q	1.0	0.05	1000	3	True
IndivQLearningTabularSweep/224_22_4	decentralized	True	-10	False	GridWorld	MIT	FullObsDiscrete	Individual_Q	1.0	0.05	1000	4	True
IndivQLearningTabularSweep/225_22_5	decentralized	True	-10	False	GridWorld	MIT	FullObsDiscrete	Individual_Q	1.0	0.05	1000	5	True
IndivQLearningTabularSweep/226_22_6	decentralized	True	-10	False	GridWorld	MIT	FullObsDiscrete	Individual_Q	1.0	0.05	1000	6	True
IndivQLearningTabularSweep/227_22_7	decentralized	True	-10	False	GridWorld	MIT	FullObsDiscrete	Individual_Q	1.0	0.05	1000	7	True
IndivQLearningTabularSweep/228_22_8	decentralized	True	-10	False	GridWorld	MIT	FullObsDiscrete	Individual_Q	1.0	0.05	1000	8	True
IndivQLearningTabularSweep/229_22_9	decentralized	True	-10	False	GridWorld	MIT	FullObsDiscrete	Individual_Q	1.0	0.05	1000	9	True
IndivQLearningTabularSweep/230_23_0	none	True	-10	False	GridWorld	MIT	FullObsDiscrete	Individual_Q	1.0	0.05	1000	0	True
IndivQLearningTabularSweep/231_23_1	none	True	-10	False	GridWorld	MIT	FullObsDiscrete	Individual_Q	1.0	0.05	1000	1	True
IndivQLearningTabularSweep/232_23_2	none	True	-10	False	GridWorld	MIT	FullObsDiscrete	Individual_Q	1.0	0.05	1000	2	True
IndivQLearningTabularSweep/233_23_3	none	True	-10	False	GridWorld	MIT	FullObsDiscrete	Individual_Q	1.0	0.05	1000	3	True
IndivQLearningTabularSweep/234_23_4	none	True	-10	False	GridWorld	MIT	FullObsDiscrete	Individual_Q	1.0	0.05	1000	4	True
IndivQLearningTabularSweep/235_23_5	none	True	-10	False	GridWorld	MIT	FullObsDiscrete	Individual_Q	1.0	0.05	1000	5	True
IndivQLearningTabularSweep/236_23_6	none	True	-10	False	GridWorld	MIT	FullObsDiscrete	Individual_Q	1.0	0.05	1000	6	True
IndivQLearningTabularSweep/237_23_7	none	True	-10	False	GridWorld	MIT	FullObsDiscrete	Individual_Q	1.0	0.05	1000	7	True
IndivQLearningTabularSweep/238_23_8	none	True	-10	False	GridWorld	MIT	FullObsDiscrete	Individual_Q	1.0	0.05	1000	8	True
IndivQLearningTabularSweep/239_23_9	none	True	-10	False	GridWorld	MIT	FullObsDiscrete	Individual_Q	1.0	0.05	1000	9	True
