# Supplementary material
Source: ML conference proceedings conference paper supplement (https://proceedings.neurips.cc/paper_files/paper/2022/hash/57444e14ecd9e2c8f603b4f012ce3811-Abstract.html)
Supplement: Supplementary file 1 [file 57444e14ecd9e2c8f603b4f012ce3811-Supplemental-Conference.zip › 3410_shield_decentralization_for_sa-Supplementary Material/parallel_configs/IndivQLearningVar.csv]

run_name	shield	punish_unsafe_orig_action	punish_unsafe_orig_action_modifier	randomize_starts	map_type	grid_world_map_name	grid_world_obs_type	learner_type	learner_anneal_eps_start	learner_anneal_eps_finish	max_total_steps	seed
IndivQLearningVar/0_0_0	centralized	False	0	True	GridWorld	Pentagon	PartialObsDiscrete	Individual_Q	0.2	0.2	1000000	0
IndivQLearningVar/1_0_1	centralized	False	0	True	GridWorld	Pentagon	PartialObsDiscrete	Individual_Q	0.2	0.2	1000000	1
IndivQLearningVar/2_0_2	centralized	False	0	True	GridWorld	Pentagon	PartialObsDiscrete	Individual_Q	0.2	0.2	1000000	2
IndivQLearningVar/3_0_3	centralized	False	0	True	GridWorld	Pentagon	PartialObsDiscrete	Individual_Q	0.2	0.2	1000000	3
IndivQLearningVar/4_0_4	centralized	False	0	True	GridWorld	Pentagon	PartialObsDiscrete	Individual_Q	0.2	0.2	1000000	4
IndivQLearningVar/5_0_5	centralized	False	0	True	GridWorld	Pentagon	PartialObsDiscrete	Individual_Q	0.2	0.2	1000000	5
IndivQLearningVar/6_0_6	centralized	False	0	True	GridWorld	Pentagon	PartialObsDiscrete	Individual_Q	0.2	0.2	1000000	6
IndivQLearningVar/7_0_7	centralized	False	0	True	GridWorld	Pentagon	PartialObsDiscrete	Individual_Q	0.2	0.2	1000000	7
IndivQLearningVar/8_0_8	centralized	False	0	True	GridWorld	Pentagon	PartialObsDiscrete	Individual_Q	0.2	0.2	1000000	8
IndivQLearningVar/9_0_9	centralized	False	0	True	GridWorld	Pentagon	PartialObsDiscrete	Individual_Q	0.2	0.2	1000000	9
IndivQLearningVar/10_1_0	centralized	True	-10	True	GridWorld	Pentagon	PartialObsDiscrete	Individual_Q	0.2	0.2	1000000	0
IndivQLearningVar/11_1_1	centralized	True	-10	True	GridWorld	Pentagon	PartialObsDiscrete	Individual_Q	0.2	0.2	1000000	1
IndivQLearningVar/12_1_2	centralized	True	-10	True	GridWorld	Pentagon	PartialObsDiscrete	Individual_Q	0.2	0.2	1000000	2
IndivQLearningVar/13_1_3	centralized	True	-10	True	GridWorld	Pentagon	PartialObsDiscrete	Individual_Q	0.2	0.2	1000000	3
IndivQLearningVar/14_1_4	centralized	True	-10	True	GridWorld	Pentagon	PartialObsDiscrete	Individual_Q	0.2	0.2	1000000	4
IndivQLearningVar/15_1_5	centralized	True	-10	True	GridWorld	Pentagon	PartialObsDiscrete	Individual_Q	0.2	0.2	1000000	5
IndivQLearningVar/16_1_6	centralized	True	-10	True	GridWorld	Pentagon	PartialObsDiscrete	Individual_Q	0.2	0.2	1000000	6
IndivQLearningVar/17_1_7	centralized	True	-10	True	GridWorld	Pentagon	PartialObsDiscrete	Individual_Q	0.2	0.2	1000000	7
IndivQLearningVar/18_1_8	centralized	True	-10	True	GridWorld	Pentagon	PartialObsDiscrete	Individual_Q	0.2	0.2	1000000	8
IndivQLearningVar/19_1_9	centralized	True	-10	True	GridWorld	Pentagon	PartialObsDiscrete	Individual_Q	0.2	0.2	1000000	9
IndivQLearningVar/20_2_0	centralized	True	-100	True	GridWorld	Pentagon	PartialObsDiscrete	Individual_Q	0.2	0.2	1000000	0
IndivQLearningVar/21_2_1	centralized	True	-100	True	GridWorld	Pentagon	PartialObsDiscrete	Individual_Q	0.2	0.2	1000000	1
IndivQLearningVar/22_2_2	centralized	True	-100	True	GridWorld	Pentagon	PartialObsDiscrete	Individual_Q	0.2	0.2	1000000	2
IndivQLearningVar/23_2_3	centralized	True	-100	True	GridWorld	Pentagon	PartialObsDiscrete	Individual_Q	0.2	0.2	1000000	3
IndivQLearningVar/24_2_4	centralized	True	-100	True	GridWorld	Pentagon	PartialObsDiscrete	Individual_Q	0.2	0.2	1000000	4
IndivQLearningVar/25_2_5	centralized	True	-100	True	GridWorld	Pentagon	PartialObsDiscrete	Individual_Q	0.2	0.2	1000000	5
IndivQLearningVar/26_2_6	centralized	True	-100	True	GridWorld	Pentagon	PartialObsDiscrete	Individual_Q	0.2	0.2	1000000	6
IndivQLearningVar/27_2_7	centralized	True	-100	True	GridWorld	Pentagon	PartialObsDiscrete	Individual_Q	0.2	0.2	1000000	7
IndivQLearningVar/28_2_8	centralized	True	-100	True	GridWorld	Pentagon	PartialObsDiscrete	Individual_Q	0.2	0.2	1000000	8
IndivQLearningVar/29_2_9	centralized	True	-100	True	GridWorld	Pentagon	PartialObsDiscrete	Individual_Q	0.2	0.2	1000000	9
IndivQLearningVar/30_3_0	centralized	False	0	True	GridWorld	Pentagon	PartialObsDiscrete	Individual_Q	0.2	0.01	1000000	0
IndivQLearningVar/31_3_1	centralized	False	0	True	GridWorld	Pentagon	PartialObsDiscrete	Individual_Q	0.2	0.01	1000000	1
IndivQLearningVar/32_3_2	centralized	False	0	True	GridWorld	Pentagon	PartialObsDiscrete	Individual_Q	0.2	0.01	1000000	2
IndivQLearningVar/33_3_3	centralized	False	0	True	GridWorld	Pentagon	PartialObsDiscrete	Individual_Q	0.2	0.01	1000000	3
IndivQLearningVar/34_3_4	centralized	False	0	True	GridWorld	Pentagon	PartialObsDiscrete	Individual_Q	0.2	0.01	1000000	4
IndivQLearningVar/35_3_5	centralized	False	0	True	GridWorld	Pentagon	PartialObsDiscrete	Individual_Q	0.2	0.01	1000000	5
IndivQLearningVar/36_3_6	centralized	False	0	True	GridWorld	Pentagon	PartialObsDiscrete	Individual_Q	0.2	0.01	1000000	6
IndivQLearningVar/37_3_7	centralized	False	0	True	GridWorld	Pentagon	PartialObsDiscrete	Individual_Q	0.2	0.01	1000000	7
IndivQLearningVar/38_3_8	centralized	False	0	True	GridWorld	Pentagon	PartialObsDiscrete	Individual_Q	0.2	0.01	1000000	8
IndivQLearningVar/39_3_9	centralized	False	0	True	GridWorld	Pentagon	PartialObsDiscrete	Individual_Q	0.2	0.01	1000000	9
IndivQLearningVar/40_4_0	centralized	True	-10	True	GridWorld	Pentagon	PartialObsDiscrete	Individual_Q	0.2	0.01	1000000	0
IndivQLearningVar/41_4_1	centralized	True	-10	True	GridWorld	Pentagon	PartialObsDiscrete	Individual_Q	0.2	0.01	1000000	1
IndivQLearningVar/42_4_2	centralized	True	-10	True	GridWorld	Pentagon	PartialObsDiscrete	Individual_Q	0.2	0.01	1000000	2
IndivQLearningVar/43_4_3	centralized	True	-10	True	GridWorld	Pentagon	PartialObsDiscrete	Individual_Q	0.2	0.01	1000000	3
IndivQLearningVar/44_4_4	centralized	True	-10	True	GridWorld	Pentagon	PartialObsDiscrete	Individual_Q	0.2	0.01	1000000	4
IndivQLearningVar/45_4_5	centralized	True	-10	True	GridWorld	Pentagon	PartialObsDiscrete	Individual_Q	0.2	0.01	1000000	5
IndivQLearningVar/46_4_6	centralized	True	-10	True	GridWorld	Pentagon	PartialObsDiscrete	Individual_Q	0.2	0.01	1000000	6
IndivQLearningVar/47_4_7	centralized	True	-10	True	GridWorld	Pentagon	PartialObsDiscrete	Individual_Q	0.2	0.01	1000000	7
IndivQLearningVar/48_4_8	centralized	True	-10	True	GridWorld	Pentagon	PartialObsDiscrete	Individual_Q	0.2	0.01	1000000	8
IndivQLearningVar/49_4_9	centralized	True	-10	True	GridWorld	Pentagon	PartialObsDiscrete	Individual_Q	0.2	0.01	1000000	9
IndivQLearningVar/50_5_0	centralized	True	-100	True	GridWorld	Pentagon	PartialObsDiscrete	Individual_Q	0.2	0.01	1000000	0
IndivQLearningVar/51_5_1	centralized	True	-100	True	GridWorld	Pentagon	PartialObsDiscrete	Individual_Q	0.2	0.01	1000000	1
IndivQLearningVar/52_5_2	centralized	True	-100	True	GridWorld	Pentagon	PartialObsDiscrete	Individual_Q	0.2	0.01	1000000	2
IndivQLearningVar/53_5_3	centralized	True	-100	True	GridWorld	Pentagon	PartialObsDiscrete	Individual_Q	0.2	0.01	1000000	3
IndivQLearningVar/54_5_4	centralized	True	-100	True	GridWorld	Pentagon	PartialObsDiscrete	Individual_Q	0.2	0.01	1000000	4
IndivQLearningVar/55_5_5	centralized	True	-100	True	GridWorld	Pentagon	PartialObsDiscrete	Individual_Q	0.2	0.01	1000000	5
IndivQLearningVar/56_5_6	centralized	True	-100	True	GridWorld	Pentagon	PartialObsDiscrete	Individual_Q	0.2	0.01	1000000	6
IndivQLearningVar/57_5_7	centralized	True	-100	True	GridWorld	Pentagon	PartialObsDiscrete	Individual_Q	0.2	0.01	1000000	7
IndivQLearningVar/58_5_8	centralized	True	-100	True	GridWorld	Pentagon	PartialObsDiscrete	Individual_Q	0.2	0.01	1000000	8
IndivQLearningVar/59_5_9	centralized	True	-100	True	GridWorld	Pentagon	PartialObsDiscrete	Individual_Q	0.2	0.01	1000000	9
IndivQLearningVar/60_6_0	centralized	False	0	True	GridWorld	Pentagon	FullObsDiscrete	Individual_Q	0.2	0.2	1000000	0
IndivQLearningVar/61_6_1	centralized	False	0	True	GridWorld	Pentagon	FullObsDiscrete	Individual_Q	0.2	0.2	1000000	1
IndivQLearningVar/62_6_2	centralized	False	0	True	GridWorld	Pentagon	FullObsDiscrete	Individual_Q	0.2	0.2	1000000	2
IndivQLearningVar/63_6_3	centralized	False	0	True	GridWorld	Pentagon	FullObsDiscrete	Individual_Q	0.2	0.2	1000000	3
IndivQLearningVar/64_6_4	centralized	False	0	True	GridWorld	Pentagon	FullObsDiscrete	Individual_Q	0.2	0.2	1000000	4
IndivQLearningVar/65_6_5	centralized	False	0	True	GridWorld	Pentagon	FullObsDiscrete	Individual_Q	0.2	0.2	1000000	5
IndivQLearningVar/66_6_6	centralized	False	0	True	GridWorld	Pentagon	FullObsDiscrete	Individual_Q	0.2	0.2	1000000	6
IndivQLearningVar/67_6_7	centralized	False	0	True	GridWorld	Pentagon	FullObsDiscrete	Individual_Q	0.2	0.2	1000000	7
IndivQLearningVar/68_6_8	centralized	False	0	True	GridWorld	Pentagon	FullObsDiscrete	Individual_Q	0.2	0.2	1000000	8
IndivQLearningVar/69_6_9	centralized	False	0	True	GridWorld	Pentagon	FullObsDiscrete	Individual_Q	0.2	0.2	1000000	9
IndivQLearningVar/70_7_0	centralized	True	-10	True	GridWorld	Pentagon	FullObsDiscrete	Individual_Q	0.2	0.2	1000000	0
IndivQLearningVar/71_7_1	centralized	True	-10	True	GridWorld	Pentagon	FullObsDiscrete	Individual_Q	0.2	0.2	1000000	1
IndivQLearningVar/72_7_2	centralized	True	-10	True	GridWorld	Pentagon	FullObsDiscrete	Individual_Q	0.2	0.2	1000000	2
IndivQLearningVar/73_7_3	centralized	True	-10	True	GridWorld	Pentagon	FullObsDiscrete	Individual_Q	0.2	0.2	1000000	3
IndivQLearningVar/74_7_4	centralized	True	-10	True	GridWorld	Pentagon	FullObsDiscrete	Individual_Q	0.2	0.2	1000000	4
IndivQLearningVar/75_7_5	centralized	True	-10	True	GridWorld	Pentagon	FullObsDiscrete	Individual_Q	0.2	0.2	1000000	5
IndivQLearningVar/76_7_6	centralized	True	-10	True	GridWorld	Pentagon	FullObsDiscrete	Individual_Q	0.2	0.2	1000000	6
IndivQLearningVar/77_7_7	centralized	True	-10	True	GridWorld	Pentagon	FullObsDiscrete	Individual_Q	0.2	0.2	1000000	7
IndivQLearningVar/78_7_8	centralized	True	-10	True	GridWorld	Pentagon	FullObsDiscrete	Individual_Q	0.2	0.2	1000000	8
IndivQLearningVar/79_7_9	centralized	True	-10	True	GridWorld	Pentagon	FullObsDiscrete	Individual_Q	0.2	0.2	1000000	9
IndivQLearningVar/80_8_0	centralized	True	-100	True	GridWorld	Pentagon	FullObsDiscrete	Individual_Q	0.2	0.2	1000000	0
IndivQLearningVar/81_8_1	centralized	True	-100	True	GridWorld	Pentagon	FullObsDiscrete	Individual_Q	0.2	0.2	1000000	1
IndivQLearningVar/82_8_2	centralized	True	-100	True	GridWorld	Pentagon	FullObsDiscrete	Individual_Q	0.2	0.2	1000000	2
IndivQLearningVar/83_8_3	centralized	True	-100	True	GridWorld	Pentagon	FullObsDiscrete	Individual_Q	0.2	0.2	1000000	3
IndivQLearningVar/84_8_4	centralized	True	-100	True	GridWorld	Pentagon	FullObsDiscrete	Individual_Q	0.2	0.2	1000000	4
IndivQLearningVar/85_8_5	centralized	True	-100	True	GridWorld	Pentagon	FullObsDiscrete	Individual_Q	0.2	0.2	1000000	5
IndivQLearningVar/86_8_6	centralized	True	-100	True	GridWorld	Pentagon	FullObsDiscrete	Individual_Q	0.2	0.2	1000000	6
IndivQLearningVar/87_8_7	centralized	True	-100	True	GridWorld	Pentagon	FullObsDiscrete	Individual_Q	0.2	0.2	1000000	7
IndivQLearningVar/88_8_8	centralized	True	-100	True	GridWorld	Pentagon	FullObsDiscrete	Individual_Q	0.2	0.2	1000000	8
IndivQLearningVar/89_8_9	centralized	True	-100	True	GridWorld	Pentagon	FullObsDiscrete	Individual_Q	0.2	0.2	1000000	9
IndivQLearningVar/90_9_0	centralized	False	0	True	GridWorld	Pentagon	FullObsDiscrete	Individual_Q	0.2	0.01	1000000	0
IndivQLearningVar/91_9_1	centralized	False	0	True	GridWorld	Pentagon	FullObsDiscrete	Individual_Q	0.2	0.01	1000000	1
IndivQLearningVar/92_9_2	centralized	False	0	True	GridWorld	Pentagon	FullObsDiscrete	Individual_Q	0.2	0.01	1000000	2
IndivQLearningVar/93_9_3	centralized	False	0	True	GridWorld	Pentagon	FullObsDiscrete	Individual_Q	0.2	0.01	1000000	3
IndivQLearningVar/94_9_4	centralized	False	0	True	GridWorld	Pentagon	FullObsDiscrete	Individual_Q	0.2	0.01	1000000	4
IndivQLearningVar/95_9_5	centralized	False	0	True	GridWorld	Pentagon	FullObsDiscrete	Individual_Q	0.2	0.01	1000000	5
IndivQLearningVar/96_9_6	centralized	False	0	True	GridWorld	Pentagon	FullObsDiscrete	Individual_Q	0.2	0.01	1000000	6
IndivQLearningVar/97_9_7	centralized	False	0	True	GridWorld	Pentagon	FullObsDiscrete	Individual_Q	0.2	0.01	1000000	7
IndivQLearningVar/98_9_8	centralized	False	0	True	GridWorld	Pentagon	FullObsDiscrete	Individual_Q	0.2	0.01	1000000	8
IndivQLearningVar/99_9_9	centralized	False	0	True	GridWorld	Pentagon	FullObsDiscrete	Individual_Q	0.2	0.01	1000000	9
IndivQLearningVar/100_10_0	centralized	True	-10	True	GridWorld	Pentagon	FullObsDiscrete	Individual_Q	0.2	0.01	1000000	0
IndivQLearningVar/101_10_1	centralized	True	-10	True	GridWorld	Pentagon	FullObsDiscrete	Individual_Q	0.2	0.01	1000000	1
IndivQLearningVar/102_10_2	centralized	True	-10	True	GridWorld	Pentagon	FullObsDiscrete	Individual_Q	0.2	0.01	1000000	2
IndivQLearningVar/103_10_3	centralized	True	-10	True	GridWorld	Pentagon	FullObsDiscrete	Individual_Q	0.2	0.01	1000000	3
IndivQLearningVar/104_10_4	centralized	True	-10	True	GridWorld	Pentagon	FullObsDiscrete	Individual_Q	0.2	0.01	1000000	4
IndivQLearningVar/105_10_5	centralized	True	-10	True	GridWorld	Pentagon	FullObsDiscrete	Individual_Q	0.2	0.01	1000000	5
IndivQLearningVar/106_10_6	centralized	True	-10	True	GridWorld	Pentagon	FullObsDiscrete	Individual_Q	0.2	0.01	1000000	6
IndivQLearningVar/107_10_7	centralized	True	-10	True	GridWorld	Pentagon	FullObsDiscrete	Individual_Q	0.2	0.01	1000000	7
IndivQLearningVar/108_10_8	centralized	True	-10	True	GridWorld	Pentagon	FullObsDiscrete	Individual_Q	0.2	0.01	1000000	8
IndivQLearningVar/109_10_9	centralized	True	-10	True	GridWorld	Pentagon	FullObsDiscrete	Individual_Q	0.2	0.01	1000000	9
IndivQLearningVar/110_11_0	centralized	True	-100	True	GridWorld	Pentagon	FullObsDiscrete	Individual_Q	0.2	0.01	1000000	0
IndivQLearningVar/111_11_1	centralized	True	-100	True	GridWorld	Pentagon	FullObsDiscrete	Individual_Q	0.2	0.01	1000000	1
IndivQLearningVar/112_11_2	centralized	True	-100	True	GridWorld	Pentagon	FullObsDiscrete	Individual_Q	0.2	0.01	1000000	2
IndivQLearningVar/113_11_3	centralized	True	-100	True	GridWorld	Pentagon	FullObsDiscrete	Individual_Q	0.2	0.01	1000000	3
IndivQLearningVar/114_11_4	centralized	True	-100	True	GridWorld	Pentagon	FullObsDiscrete	Individual_Q	0.2	0.01	1000000	4
IndivQLearningVar/115_11_5	centralized	True	-100	True	GridWorld	Pentagon	FullObsDiscrete	Individual_Q	0.2	0.01	1000000	5
IndivQLearningVar/116_11_6	centralized	True	-100	True	GridWorld	Pentagon	FullObsDiscrete	Individual_Q	0.2	0.01	1000000	6
IndivQLearningVar/117_11_7	centralized	True	-100	True	GridWorld	Pentagon	FullObsDiscrete	Individual_Q	0.2	0.01	1000000	7
IndivQLearningVar/118_11_8	centralized	True	-100	True	GridWorld	Pentagon	FullObsDiscrete	Individual_Q	0.2	0.01	1000000	8
IndivQLearningVar/119_11_9	centralized	True	-100	True	GridWorld	Pentagon	FullObsDiscrete	Individual_Q	0.2	0.01	1000000	9
IndivQLearningVar/120_12_0	decentralized	False	0	True	GridWorld	Pentagon	PartialObsDiscrete	Individual_Q	0.2	0.2	1000000	0
IndivQLearningVar/121_12_1	decentralized	False	0	True	GridWorld	Pentagon	PartialObsDiscrete	Individual_Q	0.2	0.2	1000000	1
IndivQLearningVar/122_12_2	decentralized	False	0	True	GridWorld	Pentagon	PartialObsDiscrete	Individual_Q	0.2	0.2	1000000	2
IndivQLearningVar/123_12_3	decentralized	False	0	True	GridWorld	Pentagon	PartialObsDiscrete	Individual_Q	0.2	0.2	1000000	3
IndivQLearningVar/124_12_4	decentralized	False	0	True	GridWorld	Pentagon	PartialObsDiscrete	Individual_Q	0.2	0.2	1000000	4
IndivQLearningVar/125_12_5	decentralized	False	0	True	GridWorld	Pentagon	PartialObsDiscrete	Individual_Q	0.2	0.2	1000000	5
IndivQLearningVar/126_12_6	decentralized	False	0	True	GridWorld	Pentagon	PartialObsDiscrete	Individual_Q	0.2	0.2	1000000	6
IndivQLearningVar/127_12_7	decentralized	False	0	True	GridWorld	Pentagon	PartialObsDiscrete	Individual_Q	0.2	0.2	1000000	7
IndivQLearningVar/128_12_8	decentralized	False	0	True	GridWorld	Pentagon	PartialObsDiscrete	Individual_Q	0.2	0.2	1000000	8
IndivQLearningVar/129_12_9	decentralized	False	0	True	GridWorld	Pentagon	PartialObsDiscrete	Individual_Q	0.2	0.2	1000000	9
IndivQLearningVar/130_13_0	decentralized	True	-10	True	GridWorld	Pentagon	PartialObsDiscrete	Individual_Q	0.2	0.2	1000000	0
IndivQLearningVar/131_13_1	decentralized	True	-10	True	GridWorld	Pentagon	PartialObsDiscrete	Individual_Q	0.2	0.2	1000000	1
IndivQLearningVar/132_13_2	decentralized	True	-10	True	GridWorld	Pentagon	PartialObsDiscrete	Individual_Q	0.2	0.2	1000000	2
IndivQLearningVar/133_13_3	decentralized	True	-10	True	GridWorld	Pentagon	PartialObsDiscrete	Individual_Q	0.2	0.2	1000000	3
IndivQLearningVar/134_13_4	decentralized	True	-10	True	GridWorld	Pentagon	PartialObsDiscrete	Individual_Q	0.2	0.2	1000000	4
IndivQLearningVar/135_13_5	decentralized	True	-10	True	GridWorld	Pentagon	PartialObsDiscrete	Individual_Q	0.2	0.2	1000000	5
IndivQLearningVar/136_13_6	decentralized	True	-10	True	GridWorld	Pentagon	PartialObsDiscrete	Individual_Q	0.2	0.2	1000000	6
IndivQLearningVar/137_13_7	decentralized	True	-10	True	GridWorld	Pentagon	PartialObsDiscrete	Individual_Q	0.2	0.2	1000000	7
IndivQLearningVar/138_13_8	decentralized	True	-10	True	GridWorld	Pentagon	PartialObsDiscrete	Individual_Q	0.2	0.2	1000000	8
IndivQLearningVar/139_13_9	decentralized	True	-10	True	GridWorld	Pentagon	PartialObsDiscrete	Individual_Q	0.2	0.2	1000000	9
IndivQLearningVar/140_14_0	decentralized	True	-100	True	GridWorld	Pentagon	PartialObsDiscrete	Individual_Q	0.2	0.2	1000000	0
IndivQLearningVar/141_14_1	decentralized	True	-100	True	GridWorld	Pentagon	PartialObsDiscrete	Individual_Q	0.2	0.2	1000000	1
IndivQLearningVar/142_14_2	decentralized	True	-100	True	GridWorld	Pentagon	PartialObsDiscrete	Individual_Q	0.2	0.2	1000000	2
IndivQLearningVar/143_14_3	decentralized	True	-100	True	GridWorld	Pentagon	PartialObsDiscrete	Individual_Q	0.2	0.2	1000000	3
IndivQLearningVar/144_14_4	decentralized	True	-100	True	GridWorld	Pentagon	PartialObsDiscrete	Individual_Q	0.2	0.2	1000000	4
IndivQLearningVar/145_14_5	decentralized	True	-100	True	GridWorld	Pentagon	PartialObsDiscrete	Individual_Q	0.2	0.2	1000000	5
IndivQLearningVar/146_14_6	decentralized	True	-100	True	GridWorld	Pentagon	PartialObsDiscrete	Individual_Q	0.2	0.2	1000000	6
IndivQLearningVar/147_14_7	decentralized	True	-100	True	GridWorld	Pentagon	PartialObsDiscrete	Individual_Q	0.2	0.2	1000000	7
IndivQLearningVar/148_14_8	decentralized	True	-100	True	GridWorld	Pentagon	PartialObsDiscrete	Individual_Q	0.2	0.2	1000000	8
IndivQLearningVar/149_14_9	decentralized	True	-100	True	GridWorld	Pentagon	PartialObsDiscrete	Individual_Q	0.2	0.2	1000000	9
IndivQLearningVar/150_15_0	decentralized	False	0	True	GridWorld	Pentagon	PartialObsDiscrete	Individual_Q	0.2	0.01	1000000	0
IndivQLearningVar/151_15_1	decentralized	False	0	True	GridWorld	Pentagon	PartialObsDiscrete	Individual_Q	0.2	0.01	1000000	1
IndivQLearningVar/152_15_2	decentralized	False	0	True	GridWorld	Pentagon	PartialObsDiscrete	Individual_Q	0.2	0.01	1000000	2
IndivQLearningVar/153_15_3	decentralized	False	0	True	GridWorld	Pentagon	PartialObsDiscrete	Individual_Q	0.2	0.01	1000000	3
IndivQLearningVar/154_15_4	decentralized	False	0	True	GridWorld	Pentagon	PartialObsDiscrete	Individual_Q	0.2	0.01	1000000	4
IndivQLearningVar/155_15_5	decentralized	False	0	True	GridWorld	Pentagon	PartialObsDiscrete	Individual_Q	0.2	0.01	1000000	5
IndivQLearningVar/156_15_6	decentralized	False	0	True	GridWorld	Pentagon	PartialObsDiscrete	Individual_Q	0.2	0.01	1000000	6
IndivQLearningVar/157_15_7	decentralized	False	0	True	GridWorld	Pentagon	PartialObsDiscrete	Individual_Q	0.2	0.01	1000000	7
IndivQLearningVar/158_15_8	decentralized	False	0	True	GridWorld	Pentagon	PartialObsDiscrete	Individual_Q	0.2	0.01	1000000	8
IndivQLearningVar/159_15_9	decentralized	False	0	True	GridWorld	Pentagon	PartialObsDiscrete	Individual_Q	0.2	0.01	1000000	9
IndivQLearningVar/160_16_0	decentralized	True	-10	True	GridWorld	Pentagon	PartialObsDiscrete	Individual_Q	0.2	0.01	1000000	0
IndivQLearningVar/161_16_1	decentralized	True	-10	True	GridWorld	Pentagon	PartialObsDiscrete	Individual_Q	0.2	0.01	1000000	1
IndivQLearningVar/162_16_2	decentralized	True	-10	True	GridWorld	Pentagon	PartialObsDiscrete	Individual_Q	0.2	0.01	1000000	2
IndivQLearningVar/163_16_3	decentralized	True	-10	True	GridWorld	Pentagon	PartialObsDiscrete	Individual_Q	0.2	0.01	1000000	3
IndivQLearningVar/164_16_4	decentralized	True	-10	True	GridWorld	Pentagon	PartialObsDiscrete	Individual_Q	0.2	0.01	1000000	4
IndivQLearningVar/165_16_5	decentralized	True	-10	True	GridWorld	Pentagon	PartialObsDiscrete	Individual_Q	0.2	0.01	1000000	5
IndivQLearningVar/166_16_6	decentralized	True	-10	True	GridWorld	Pentagon	PartialObsDiscrete	Individual_Q	0.2	0.01	1000000	6
IndivQLearningVar/167_16_7	decentralized	True	-10	True	GridWorld	Pentagon	PartialObsDiscrete	Individual_Q	0.2	0.01	1000000	7
IndivQLearningVar/168_16_8	decentralized	True	-10	True	GridWorld	Pentagon	PartialObsDiscrete	Individual_Q	0.2	0.01	1000000	8
IndivQLearningVar/169_16_9	decentralized	True	-10	True	GridWorld	Pentagon	PartialObsDiscrete	Individual_Q	0.2	0.01	1000000	9
IndivQLearningVar/170_17_0	decentralized	True	-100	True	GridWorld	Pentagon	PartialObsDiscrete	Individual_Q	0.2	0.01	1000000	0
IndivQLearningVar/171_17_1	decentralized	True	-100	True	GridWorld	Pentagon	PartialObsDiscrete	Individual_Q	0.2	0.01	1000000	1
IndivQLearningVar/172_17_2	decentralized	True	-100	True	GridWorld	Pentagon	PartialObsDiscrete	Individual_Q	0.2	0.01	1000000	2
IndivQLearningVar/173_17_3	decentralized	True	-100	True	GridWorld	Pentagon	PartialObsDiscrete	Individual_Q	0.2	0.01	1000000	3
IndivQLearningVar/174_17_4	decentralized	True	-100	True	GridWorld	Pentagon	PartialObsDiscrete	Individual_Q	0.2	0.01	1000000	4
IndivQLearningVar/175_17_5	decentralized	True	-100	True	GridWorld	Pentagon	PartialObsDiscrete	Individual_Q	0.2	0.01	1000000	5
IndivQLearningVar/176_17_6	decentralized	True	-100	True	GridWorld	Pentagon	PartialObsDiscrete	Individual_Q	0.2	0.01	1000000	6
IndivQLearningVar/177_17_7	decentralized	True	-100	True	GridWorld	Pentagon	PartialObsDiscrete	Individual_Q	0.2	0.01	1000000	7
IndivQLearningVar/178_17_8	decentralized	True	-100	True	GridWorld	Pentagon	PartialObsDiscrete	Individual_Q	0.2	0.01	1000000	8
IndivQLearningVar/179_17_9	decentralized	True	-100	True	GridWorld	Pentagon	PartialObsDiscrete	Individual_Q	0.2	0.01	1000000	9
IndivQLearningVar/180_18_0	decentralized	False	0	True	GridWorld	Pentagon	FullObsDiscrete	Individual_Q	0.2	0.2	1000000	0
IndivQLearningVar/181_18_1	decentralized	False	0	True	GridWorld	Pentagon	FullObsDiscrete	Individual_Q	0.2	0.2	1000000	1
IndivQLearningVar/182_18_2	decentralized	False	0	True	GridWorld	Pentagon	FullObsDiscrete	Individual_Q	0.2	0.2	1000000	2
IndivQLearningVar/183_18_3	decentralized	False	0	True	GridWorld	Pentagon	FullObsDiscrete	Individual_Q	0.2	0.2	1000000	3
IndivQLearningVar/184_18_4	decentralized	False	0	True	GridWorld	Pentagon	FullObsDiscrete	Individual_Q	0.2	0.2	1000000	4
IndivQLearningVar/185_18_5	decentralized	False	0	True	GridWorld	Pentagon	FullObsDiscrete	Individual_Q	0.2	0.2	1000000	5
IndivQLearningVar/186_18_6	decentralized	False	0	True	GridWorld	Pentagon	FullObsDiscrete	Individual_Q	0.2	0.2	1000000	6
IndivQLearningVar/187_18_7	decentralized	False	0	True	GridWorld	Pentagon	FullObsDiscrete	Individual_Q	0.2	0.2	1000000	7
IndivQLearningVar/188_18_8	decentralized	False	0	True	GridWorld	Pentagon	FullObsDiscrete	Individual_Q	0.2	0.2	1000000	8
IndivQLearningVar/189_18_9	decentralized	False	0	True	GridWorld	Pentagon	FullObsDiscrete	Individual_Q	0.2	0.2	1000000	9
IndivQLearningVar/190_19_0	decentralized	True	-10	True	GridWorld	Pentagon	FullObsDiscrete	Individual_Q	0.2	0.2	1000000	0
IndivQLearningVar/191_19_1	decentralized	True	-10	True	GridWorld	Pentagon	FullObsDiscrete	Individual_Q	0.2	0.2	1000000	1
IndivQLearningVar/192_19_2	decentralized	True	-10	True	GridWorld	Pentagon	FullObsDiscrete	Individual_Q	0.2	0.2	1000000	2
IndivQLearningVar/193_19_3	decentralized	True	-10	True	GridWorld	Pentagon	FullObsDiscrete	Individual_Q	0.2	0.2	1000000	3
IndivQLearningVar/194_19_4	decentralized	True	-10	True	GridWorld	Pentagon	FullObsDiscrete	Individual_Q	0.2	0.2	1000000	4
IndivQLearningVar/195_19_5	decentralized	True	-10	True	GridWorld	Pentagon	FullObsDiscrete	Individual_Q	0.2	0.2	1000000	5
IndivQLearningVar/196_19_6	decentralized	True	-10	True	GridWorld	Pentagon	FullObsDiscrete	Individual_Q	0.2	0.2	1000000	6
IndivQLearningVar/197_19_7	decentralized	True	-10	True	GridWorld	Pentagon	FullObsDiscrete	Individual_Q	0.2	0.2	1000000	7
IndivQLearningVar/198_19_8	decentralized	True	-10	True	GridWorld	Pentagon	FullObsDiscrete	Individual_Q	0.2	0.2	1000000	8
IndivQLearningVar/199_19_9	decentralized	True	-10	True	GridWorld	Pentagon	FullObsDiscrete	Individual_Q	0.2	0.2	1000000	9
IndivQLearningVar/200_20_0	decentralized	True	-100	True	GridWorld	Pentagon	FullObsDiscrete	Individual_Q	0.2	0.2	1000000	0
IndivQLearningVar/201_20_1	decentralized	True	-100	True	GridWorld	Pentagon	FullObsDiscrete	Individual_Q	0.2	0.2	1000000	1
IndivQLearningVar/202_20_2	decentralized	True	-100	True	GridWorld	Pentagon	FullObsDiscrete	Individual_Q	0.2	0.2	1000000	2
IndivQLearningVar/203_20_3	decentralized	True	-100	True	GridWorld	Pentagon	FullObsDiscrete	Individual_Q	0.2	0.2	1000000	3
IndivQLearningVar/204_20_4	decentralized	True	-100	True	GridWorld	Pentagon	FullObsDiscrete	Individual_Q	0.2	0.2	1000000	4
IndivQLearningVar/205_20_5	decentralized	True	-100	True	GridWorld	Pentagon	FullObsDiscrete	Individual_Q	0.2	0.2	1000000	5
IndivQLearningVar/206_20_6	decentralized	True	-100	True	GridWorld	Pentagon	FullObsDiscrete	Individual_Q	0.2	0.2	1000000	6
IndivQLearningVar/207_20_7	decentralized	True	-100	True	GridWorld	Pentagon	FullObsDiscrete	Individual_Q	0.2	0.2	1000000	7
IndivQLearningVar/208_20_8	decentralized	True	-100	True	GridWorld	Pentagon	FullObsDiscrete	Individual_Q	0.2	0.2	1000000	8
IndivQLearningVar/209_20_9	decentralized	True	-100	True	GridWorld	Pentagon	FullObsDiscrete	Individual_Q	0.2	0.2	1000000	9
IndivQLearningVar/210_21_0	decentralized	False	0	True	GridWorld	Pentagon	FullObsDiscrete	Individual_Q	0.2	0.01	1000000	0
IndivQLearningVar/211_21_1	decentralized	False	0	True	GridWorld	Pentagon	FullObsDiscrete	Individual_Q	0.2	0.01	1000000	1
IndivQLearningVar/212_21_2	decentralized	False	0	True	GridWorld	Pentagon	FullObsDiscrete	Individual_Q	0.2	0.01	1000000	2
IndivQLearningVar/213_21_3	decentralized	False	0	True	GridWorld	Pentagon	FullObsDiscrete	Individual_Q	0.2	0.01	1000000	3
IndivQLearningVar/214_21_4	decentralized	False	0	True	GridWorld	Pentagon	FullObsDiscrete	Individual_Q	0.2	0.01	1000000	4
IndivQLearningVar/215_21_5	decentralized	False	0	True	GridWorld	Pentagon	FullObsDiscrete	Individual_Q	0.2	0.01	1000000	5
IndivQLearningVar/216_21_6	decentralized	False	0	True	GridWorld	Pentagon	FullObsDiscrete	Individual_Q	0.2	0.01	1000000	6
IndivQLearningVar/217_21_7	decentralized	False	0	True	GridWorld	Pentagon	FullObsDiscrete	Individual_Q	0.2	0.01	1000000	7
IndivQLearningVar/218_21_8	decentralized	False	0	True	GridWorld	Pentagon	FullObsDiscrete	Individual_Q	0.2	0.01	1000000	8
IndivQLearningVar/219_21_9	decentralized	False	0	True	GridWorld	Pentagon	FullObsDiscrete	Individual_Q	0.2	0.01	1000000	9
IndivQLearningVar/220_22_0	decentralized	True	-10	True	GridWorld	Pentagon	FullObsDiscrete	Individual_Q	0.2	0.01	1000000	0
IndivQLearningVar/221_22_1	decentralized	True	-10	True	GridWorld	Pentagon	FullObsDiscrete	Individual_Q	0.2	0.01	1000000	1
IndivQLearningVar/222_22_2	decentralized	True	-10	True	GridWorld	Pentagon	FullObsDiscrete	Individual_Q	0.2	0.01	1000000	2
IndivQLearningVar/223_22_3	decentralized	True	-10	True	GridWorld	Pentagon	FullObsDiscrete	Individual_Q	0.2	0.01	1000000	3
IndivQLearningVar/224_22_4	decentralized	True	-10	True	GridWorld	Pentagon	FullObsDiscrete	Individual_Q	0.2	0.01	1000000	4
IndivQLearningVar/225_22_5	decentralized	True	-10	True	GridWorld	Pentagon	FullObsDiscrete	Individual_Q	0.2	0.01	1000000	5
IndivQLearningVar/226_22_6	decentralized	True	-10	True	GridWorld	Pentagon	FullObsDiscrete	Individual_Q	0.2	0.01	1000000	6
IndivQLearningVar/227_22_7	decentralized	True	-10	True	GridWorld	Pentagon	FullObsDiscrete	Individual_Q	0.2	0.01	1000000	7
IndivQLearningVar/228_22_8	decentralized	True	-10	True	GridWorld	Pentagon	FullObsDiscrete	Individual_Q	0.2	0.01	1000000	8
IndivQLearningVar/229_22_9	decentralized	True	-10	True	GridWorld	Pentagon	FullObsDiscrete	Individual_Q	0.2	0.01	1000000	9
IndivQLearningVar/230_23_0	decentralized	True	-100	True	GridWorld	Pentagon	FullObsDiscrete	Individual_Q	0.2	0.01	1000000	0
IndivQLearningVar/231_23_1	decentralized	True	-100	True	GridWorld	Pentagon	FullObsDiscrete	Individual_Q	0.2	0.01	1000000	1
IndivQLearningVar/232_23_2	decentralized	True	-100	True	GridWorld	Pentagon	FullObsDiscrete	Individual_Q	0.2	0.01	1000000	2
IndivQLearningVar/233_23_3	decentralized	True	-100	True	GridWorld	Pentagon	FullObsDiscrete	Individual_Q	0.2	0.01	1000000	3
IndivQLearningVar/234_23_4	decentralized	True	-100	True	GridWorld	Pentagon	FullObsDiscrete	Individual_Q	0.2	0.01	1000000	4
IndivQLearningVar/235_23_5	decentralized	True	-100	True	GridWorld	Pentagon	FullObsDiscrete	Individual_Q	0.2	0.01	1000000	5
IndivQLearningVar/236_23_6	decentralized	True	-100	True	GridWorld	Pentagon	FullObsDiscrete	Individual_Q	0.2	0.01	1000000	6
IndivQLearningVar/237_23_7	decentralized	True	-100	True	GridWorld	Pentagon	FullObsDiscrete	Individual_Q	0.2	0.01	1000000	7
IndivQLearningVar/238_23_8	decentralized	True	-100	True	GridWorld	Pentagon	FullObsDiscrete	Individual_Q	0.2	0.01	1000000	8
IndivQLearningVar/239_23_9	decentralized	True	-100	True	GridWorld	Pentagon	FullObsDiscrete	Individual_Q	0.2	0.01	1000000	9
IndivQLearningVar/240_24_0	none	False	0	True	GridWorld	Pentagon	PartialObsDiscrete	Individual_Q	0.2	0.2	1000000	0
IndivQLearningVar/241_24_1	none	False	0	True	GridWorld	Pentagon	PartialObsDiscrete	Individual_Q	0.2	0.2	1000000	1
IndivQLearningVar/242_24_2	none	False	0	True	GridWorld	Pentagon	PartialObsDiscrete	Individual_Q	0.2	0.2	1000000	2
IndivQLearningVar/243_24_3	none	False	0	True	GridWorld	Pentagon	PartialObsDiscrete	Individual_Q	0.2	0.2	1000000	3
IndivQLearningVar/244_24_4	none	False	0	True	GridWorld	Pentagon	PartialObsDiscrete	Individual_Q	0.2	0.2	1000000	4
IndivQLearningVar/245_24_5	none	False	0	True	GridWorld	Pentagon	PartialObsDiscrete	Individual_Q	0.2	0.2	1000000	5
IndivQLearningVar/246_24_6	none	False	0	True	GridWorld	Pentagon	PartialObsDiscrete	Individual_Q	0.2	0.2	1000000	6
IndivQLearningVar/247_24_7	none	False	0	True	GridWorld	Pentagon	PartialObsDiscrete	Individual_Q	0.2	0.2	1000000	7
IndivQLearningVar/248_24_8	none	False	0	True	GridWorld	Pentagon	PartialObsDiscrete	Individual_Q	0.2	0.2	1000000	8
IndivQLearningVar/249_24_9	none	False	0	True	GridWorld	Pentagon	PartialObsDiscrete	Individual_Q	0.2	0.2	1000000	9
IndivQLearningVar/250_25_0	none	True	-10	True	GridWorld	Pentagon	PartialObsDiscrete	Individual_Q	0.2	0.2	1000000	0
IndivQLearningVar/251_25_1	none	True	-10	True	GridWorld	Pentagon	PartialObsDiscrete	Individual_Q	0.2	0.2	1000000	1
IndivQLearningVar/252_25_2	none	True	-10	True	GridWorld	Pentagon	PartialObsDiscrete	Individual_Q	0.2	0.2	1000000	2
IndivQLearningVar/253_25_3	none	True	-10	True	GridWorld	Pentagon	PartialObsDiscrete	Individual_Q	0.2	0.2	1000000	3
IndivQLearningVar/254_25_4	none	True	-10	True	GridWorld	Pentagon	PartialObsDiscrete	Individual_Q	0.2	0.2	1000000	4
IndivQLearningVar/255_25_5	none	True	-10	True	GridWorld	Pentagon	PartialObsDiscrete	Individual_Q	0.2	0.2	1000000	5
IndivQLearningVar/256_25_6	none	True	-10	True	GridWorld	Pentagon	PartialObsDiscrete	Individual_Q	0.2	0.2	1000000	6
IndivQLearningVar/257_25_7	none	True	-10	True	GridWorld	Pentagon	PartialObsDiscrete	Individual_Q	0.2	0.2	1000000	7
IndivQLearningVar/258_25_8	none	True	-10	True	GridWorld	Pentagon	PartialObsDiscrete	Individual_Q	0.2	0.2	1000000	8
IndivQLearningVar/259_25_9	none	True	-10	True	GridWorld	Pentagon	PartialObsDiscrete	Individual_Q	0.2	0.2	1000000	9
IndivQLearningVar/260_26_0	none	True	-100	True	GridWorld	Pentagon	PartialObsDiscrete	Individual_Q	0.2	0.2	1000000	0
IndivQLearningVar/261_26_1	none	True	-100	True	GridWorld	Pentagon	PartialObsDiscrete	Individual_Q	0.2	0.2	1000000	1
IndivQLearningVar/262_26_2	none	True	-100	True	GridWorld	Pentagon	PartialObsDiscrete	Individual_Q	0.2	0.2	1000000	2
IndivQLearningVar/263_26_3	none	True	-100	True	GridWorld	Pentagon	PartialObsDiscrete	Individual_Q	0.2	0.2	1000000	3
IndivQLearningVar/264_26_4	none	True	-100	True	GridWorld	Pentagon	PartialObsDiscrete	Individual_Q	0.2	0.2	1000000	4
IndivQLearningVar/265_26_5	none	True	-100	True	GridWorld	Pentagon	PartialObsDiscrete	Individual_Q	0.2	0.2	1000000	5
IndivQLearningVar/266_26_6	none	True	-100	True	GridWorld	Pentagon	PartialObsDiscrete	Individual_Q	0.2	0.2	1000000	6
IndivQLearningVar/267_26_7	none	True	-100	True	GridWorld	Pentagon	PartialObsDiscrete	Individual_Q	0.2	0.2	1000000	7
IndivQLearningVar/268_26_8	none	True	-100	True	GridWorld	Pentagon	PartialObsDiscrete	Individual_Q	0.2	0.2	1000000	8
IndivQLearningVar/269_26_9	none	True	-100	True	GridWorld	Pentagon	PartialObsDiscrete	Individual_Q	0.2	0.2	1000000	9
IndivQLearningVar/270_27_0	none	False	0	True	GridWorld	Pentagon	PartialObsDiscrete	Individual_Q	0.2	0.01	1000000	0
IndivQLearningVar/271_27_1	none	False	0	True	GridWorld	Pentagon	PartialObsDiscrete	Individual_Q	0.2	0.01	1000000	1
IndivQLearningVar/272_27_2	none	False	0	True	GridWorld	Pentagon	PartialObsDiscrete	Individual_Q	0.2	0.01	1000000	2
IndivQLearningVar/273_27_3	none	False	0	True	GridWorld	Pentagon	PartialObsDiscrete	Individual_Q	0.2	0.01	1000000	3
IndivQLearningVar/274_27_4	none	False	0	True	GridWorld	Pentagon	PartialObsDiscrete	Individual_Q	0.2	0.01	1000000	4
IndivQLearningVar/275_27_5	none	False	0	True	GridWorld	Pentagon	PartialObsDiscrete	Individual_Q	0.2	0.01	1000000	5
IndivQLearningVar/276_27_6	none	False	0	True	GridWorld	Pentagon	PartialObsDiscrete	Individual_Q	0.2	0.01	1000000	6
IndivQLearningVar/277_27_7	none	False	0	True	GridWorld	Pentagon	PartialObsDiscrete	Individual_Q	0.2	0.01	1000000	7
IndivQLearningVar/278_27_8	none	False	0	True	GridWorld	Pentagon	PartialObsDiscrete	Individual_Q	0.2	0.01	1000000	8
IndivQLearningVar/279_27_9	none	False	0	True	GridWorld	Pentagon	PartialObsDiscrete	Individual_Q	0.2	0.01	1000000	9
IndivQLearningVar/280_28_0	none	True	-10	True	GridWorld	Pentagon	PartialObsDiscrete	Individual_Q	0.2	0.01	1000000	0
IndivQLearningVar/281_28_1	none	True	-10	True	GridWorld	Pentagon	PartialObsDiscrete	Individual_Q	0.2	0.01	1000000	1
IndivQLearningVar/282_28_2	none	True	-10	True	GridWorld	Pentagon	PartialObsDiscrete	Individual_Q	0.2	0.01	1000000	2
IndivQLearningVar/283_28_3	none	True	-10	True	GridWorld	Pentagon	PartialObsDiscrete	Individual_Q	0.2	0.01	1000000	3
IndivQLearningVar/284_28_4	none	True	-10	True	GridWorld	Pentagon	PartialObsDiscrete	Individual_Q	0.2	0.01	1000000	4
IndivQLearningVar/285_28_5	none	True	-10	True	GridWorld	Pentagon	PartialObsDiscrete	Individual_Q	0.2	0.01	1000000	5
IndivQLearningVar/286_28_6	none	True	-10	True	GridWorld	Pentagon	PartialObsDiscrete	Individual_Q	0.2	0.01	1000000	6
IndivQLearningVar/287_28_7	none	True	-10	True	GridWorld	Pentagon	PartialObsDiscrete	Individual_Q	0.2	0.01	1000000	7
IndivQLearningVar/288_28_8	none	True	-10	True	GridWorld	Pentagon	PartialObsDiscrete	Individual_Q	0.2	0.01	1000000	8
IndivQLearningVar/289_28_9	none	True	-10	True	GridWorld	Pentagon	PartialObsDiscrete	Individual_Q	0.2	0.01	1000000	9
IndivQLearningVar/290_29_0	none	True	-100	True	GridWorld	Pentagon	PartialObsDiscrete	Individual_Q	0.2	0.01	1000000	0
IndivQLearningVar/291_29_1	none	True	-100	True	GridWorld	Pentagon	PartialObsDiscrete	Individual_Q	0.2	0.01	1000000	1
IndivQLearningVar/292_29_2	none	True	-100	True	GridWorld	Pentagon	PartialObsDiscrete	Individual_Q	0.2	0.01	1000000	2
IndivQLearningVar/293_29_3	none	True	-100	True	GridWorld	Pentagon	PartialObsDiscrete	Individual_Q	0.2	0.01	1000000	3
IndivQLearningVar/294_29_4	none	True	-100	True	GridWorld	Pentagon	PartialObsDiscrete	Individual_Q	0.2	0.01	1000000	4
IndivQLearningVar/295_29_5	none	True	-100	True	GridWorld	Pentagon	PartialObsDiscrete	Individual_Q	0.2	0.01	1000000	5
IndivQLearningVar/296_29_6	none	True	-100	True	GridWorld	Pentagon	PartialObsDiscrete	Individual_Q	0.2	0.01	1000000	6
IndivQLearningVar/297_29_7	none	True	-100	True	GridWorld	Pentagon	PartialObsDiscrete	Individual_Q	0.2	0.01	1000000	7
IndivQLearningVar/298_29_8	none	True	-100	True	GridWorld	Pentagon	PartialObsDiscrete	Individual_Q	0.2	0.01	1000000	8
IndivQLearningVar/299_29_9	none	True	-100	True	GridWorld	Pentagon	PartialObsDiscrete	Individual_Q	0.2	0.01	1000000	9
IndivQLearningVar/300_30_0	none	False	0	True	GridWorld	Pentagon	FullObsDiscrete	Individual_Q	0.2	0.2	1000000	0
IndivQLearningVar/301_30_1	none	False	0	True	GridWorld	Pentagon	FullObsDiscrete	Individual_Q	0.2	0.2	1000000	1
IndivQLearningVar/302_30_2	none	False	0	True	GridWorld	Pentagon	FullObsDiscrete	Individual_Q	0.2	0.2	1000000	2
IndivQLearningVar/303_30_3	none	False	0	True	GridWorld	Pentagon	FullObsDiscrete	Individual_Q	0.2	0.2	1000000	3
IndivQLearningVar/304_30_4	none	False	0	True	GridWorld	Pentagon	FullObsDiscrete	Individual_Q	0.2	0.2	1000000	4
IndivQLearningVar/305_30_5	none	False	0	True	GridWorld	Pentagon	FullObsDiscrete	Individual_Q	0.2	0.2	1000000	5
IndivQLearningVar/306_30_6	none	False	0	True	GridWorld	Pentagon	FullObsDiscrete	Individual_Q	0.2	0.2	1000000	6
IndivQLearningVar/307_30_7	none	False	0	True	GridWorld	Pentagon	FullObsDiscrete	Individual_Q	0.2	0.2	1000000	7
IndivQLearningVar/308_30_8	none	False	0	True	GridWorld	Pentagon	FullObsDiscrete	Individual_Q	0.2	0.2	1000000	8
IndivQLearningVar/309_30_9	none	False	0	True	GridWorld	Pentagon	FullObsDiscrete	Individual_Q	0.2	0.2	1000000	9
IndivQLearningVar/310_31_0	none	True	-10	True	GridWorld	Pentagon	FullObsDiscrete	Individual_Q	0.2	0.2	1000000	0
IndivQLearningVar/311_31_1	none	True	-10	True	GridWorld	Pentagon	FullObsDiscrete	Individual_Q	0.2	0.2	1000000	1
IndivQLearningVar/312_31_2	none	True	-10	True	GridWorld	Pentagon	FullObsDiscrete	Individual_Q	0.2	0.2	1000000	2
IndivQLearningVar/313_31_3	none	True	-10	True	GridWorld	Pentagon	FullObsDiscrete	Individual_Q	0.2	0.2	1000000	3
IndivQLearningVar/314_31_4	none	True	-10	True	GridWorld	Pentagon	FullObsDiscrete	Individual_Q	0.2	0.2	1000000	4
IndivQLearningVar/315_31_5	none	True	-10	True	GridWorld	Pentagon	FullObsDiscrete	Individual_Q	0.2	0.2	1000000	5
IndivQLearningVar/316_31_6	none	True	-10	True	GridWorld	Pentagon	FullObsDiscrete	Individual_Q	0.2	0.2	1000000	6
IndivQLearningVar/317_31_7	none	True	-10	True	GridWorld	Pentagon	FullObsDiscrete	Individual_Q	0.2	0.2	1000000	7
IndivQLearningVar/318_31_8	none	True	-10	True	GridWorld	Pentagon	FullObsDiscrete	Individual_Q	0.2	0.2	1000000	8
IndivQLearningVar/319_31_9	none	True	-10	True	GridWorld	Pentagon	FullObsDiscrete	Individual_Q	0.2	0.2	1000000	9
IndivQLearningVar/320_32_0	none	True	-100	True	GridWorld	Pentagon	FullObsDiscrete	Individual_Q	0.2	0.2	1000000	0
IndivQLearningVar/321_32_1	none	True	-100	True	GridWorld	Pentagon	FullObsDiscrete	Individual_Q	0.2	0.2	1000000	1
IndivQLearningVar/322_32_2	none	True	-100	True	GridWorld	Pentagon	FullObsDiscrete	Individual_Q	0.2	0.2	1000000	2
IndivQLearningVar/323_32_3	none	True	-100	True	GridWorld	Pentagon	FullObsDiscrete	Individual_Q	0.2	0.2	1000000	3
IndivQLearningVar/324_32_4	none	True	-100	True	GridWorld	Pentagon	FullObsDiscrete	Individual_Q	0.2	0.2	1000000	4
IndivQLearningVar/325_32_5	none	True	-100	True	GridWorld	Pentagon	FullObsDiscrete	Individual_Q	0.2	0.2	1000000	5
IndivQLearningVar/326_32_6	none	True	-100	True	GridWorld	Pentagon	FullObsDiscrete	Individual_Q	0.2	0.2	1000000	6
IndivQLearningVar/327_32_7	none	True	-100	True	GridWorld	Pentagon	FullObsDiscrete	Individual_Q	0.2	0.2	1000000	7
IndivQLearningVar/328_32_8	none	True	-100	True	GridWorld	Pentagon	FullObsDiscrete	Individual_Q	0.2	0.2	1000000	8
IndivQLearningVar/329_32_9	none	True	-100	True	GridWorld	Pentagon	FullObsDiscrete	Individual_Q	0.2	0.2	1000000	9
IndivQLearningVar/330_33_0	none	False	0	True	GridWorld	Pentagon	FullObsDiscrete	Individual_Q	0.2	0.01	1000000	0
IndivQLearningVar/331_33_1	none	False	0	True	GridWorld	Pentagon	FullObsDiscrete	Individual_Q	0.2	0.01	1000000	1
IndivQLearningVar/332_33_2	none	False	0	True	GridWorld	Pentagon	FullObsDiscrete	Individual_Q	0.2	0.01	1000000	2
IndivQLearningVar/333_33_3	none	False	0	True	GridWorld	Pentagon	FullObsDiscrete	Individual_Q	0.2	0.01	1000000	3
IndivQLearningVar/334_33_4	none	False	0	True	GridWorld	Pentagon	FullObsDiscrete	Individual_Q	0.2	0.01	1000000	4
IndivQLearningVar/335_33_5	none	False	0	True	GridWorld	Pentagon	FullObsDiscrete	Individual_Q	0.2	0.01	1000000	5
IndivQLearningVar/336_33_6	none	False	0	True	GridWorld	Pentagon	FullObsDiscrete	Individual_Q	0.2	0.01	1000000	6
IndivQLearningVar/337_33_7	none	False	0	True	GridWorld	Pentagon	FullObsDiscrete	Individual_Q	0.2	0.01	1000000	7
IndivQLearningVar/338_33_8	none	False	0	True	GridWorld	Pentagon	FullObsDiscrete	Individual_Q	0.2	0.01	1000000	8
IndivQLearningVar/339_33_9	none	False	0	True	GridWorld	Pentagon	FullObsDiscrete	Individual_Q	0.2	0.01	1000000	9
IndivQLearningVar/340_34_0	none	True	-10	True	GridWorld	Pentagon	FullObsDiscrete	Individual_Q	0.2	0.01	1000000	0
IndivQLearningVar/341_34_1	none	True	-10	True	GridWorld	Pentagon	FullObsDiscrete	Individual_Q	0.2	0.01	1000000	1
IndivQLearningVar/342_34_2	none	True	-10	True	GridWorld	Pentagon	FullObsDiscrete	Individual_Q	0.2	0.01	1000000	2
IndivQLearningVar/343_34_3	none	True	-10	True	GridWorld	Pentagon	FullObsDiscrete	Individual_Q	0.2	0.01	1000000	3
IndivQLearningVar/344_34_4	none	True	-10	True	GridWorld	Pentagon	FullObsDiscrete	Individual_Q	0.2	0.01	1000000	4
IndivQLearningVar/345_34_5	none	True	-10	True	GridWorld	Pentagon	FullObsDiscrete	Individual_Q	0.2	0.01	1000000	5
IndivQLearningVar/346_34_6	none	True	-10	True	GridWorld	Pentagon	FullObsDiscrete	Individual_Q	0.2	0.01	1000000	6
IndivQLearningVar/347_34_7	none	True	-10	True	GridWorld	Pentagon	FullObsDiscrete	Individual_Q	0.2	0.01	1000000	7
IndivQLearningVar/348_34_8	none	True	-10	True	GridWorld	Pentagon	FullObsDiscrete	Individual_Q	0.2	0.01	1000000	8
IndivQLearningVar/349_34_9	none	True	-10	True	GridWorld	Pentagon	FullObsDiscrete	Individual_Q	0.2	0.01	1000000	9
IndivQLearningVar/350_35_0	none	True	-100	True	GridWorld	Pentagon	FullObsDiscrete	Individual_Q	0.2	0.01	1000000	0
IndivQLearningVar/351_35_1	none	True	-100	True	GridWorld	Pentagon	FullObsDiscrete	Individual_Q	0.2	0.01	1000000	1
IndivQLearningVar/352_35_2	none	True	-100	True	GridWorld	Pentagon	FullObsDiscrete	Individual_Q	0.2	0.01	1000000	2
IndivQLearningVar/353_35_3	none	True	-100	True	GridWorld	Pentagon	FullObsDiscrete	Individual_Q	0.2	0.01	1000000	3
IndivQLearningVar/354_35_4	none	True	-100	True	GridWorld	Pentagon	FullObsDiscrete	Individual_Q	0.2	0.01	1000000	4
IndivQLearningVar/355_35_5	none	True	-100	True	GridWorld	Pentagon	FullObsDiscrete	Individual_Q	0.2	0.01	1000000	5
IndivQLearningVar/356_35_6	none	True	-100	True	GridWorld	Pentagon	FullObsDiscrete	Individual_Q	0.2	0.01	1000000	6
IndivQLearningVar/357_35_7	none	True	-100	True	GridWorld	Pentagon	FullObsDiscrete	Individual_Q	0.2	0.01	1000000	7
IndivQLearningVar/358_35_8	none	True	-100	True	GridWorld	Pentagon	FullObsDiscrete	Individual_Q	0.2	0.01	1000000	8
IndivQLearningVar/359_35_9	none	True	-100	True	GridWorld	Pentagon	FullObsDiscrete	Individual_Q	0.2	0.01	1000000	9
IndivQLearningVar/360_36_0	centralized	False	0	False	GridWorld	Pentagon	PartialObsDiscrete	Individual_Q	0.2	0.2	1000000	0
IndivQLearningVar/361_36_1	centralized	False	0	False	GridWorld	Pentagon	PartialObsDiscrete	Individual_Q	0.2	0.2	1000000	1
IndivQLearningVar/362_36_2	centralized	False	0	False	GridWorld	Pentagon	PartialObsDiscrete	Individual_Q	0.2	0.2	1000000	2
IndivQLearningVar/363_36_3	centralized	False	0	False	GridWorld	Pentagon	PartialObsDiscrete	Individual_Q	0.2	0.2	1000000	3
IndivQLearningVar/364_36_4	centralized	False	0	False	GridWorld	Pentagon	PartialObsDiscrete	Individual_Q	0.2	0.2	1000000	4
IndivQLearningVar/365_36_5	centralized	False	0	False	GridWorld	Pentagon	PartialObsDiscrete	Individual_Q	0.2	0.2	1000000	5
IndivQLearningVar/366_36_6	centralized	False	0	False	GridWorld	Pentagon	PartialObsDiscrete	Individual_Q	0.2	0.2	1000000	6
IndivQLearningVar/367_36_7	centralized	False	0	False	GridWorld	Pentagon	PartialObsDiscrete	Individual_Q	0.2	0.2	1000000	7
IndivQLearningVar/368_36_8	centralized	False	0	False	GridWorld	Pentagon	PartialObsDiscrete	Individual_Q	0.2	0.2	1000000	8
IndivQLearningVar/369_36_9	centralized	False	0	False	GridWorld	Pentagon	PartialObsDiscrete	Individual_Q	0.2	0.2	1000000	9
IndivQLearningVar/370_37_0	centralized	True	-10	False	GridWorld	Pentagon	PartialObsDiscrete	Individual_Q	0.2	0.2	1000000	0
IndivQLearningVar/371_37_1	centralized	True	-10	False	GridWorld	Pentagon	PartialObsDiscrete	Individual_Q	0.2	0.2	1000000	1
IndivQLearningVar/372_37_2	centralized	True	-10	False	GridWorld	Pentagon	PartialObsDiscrete	Individual_Q	0.2	0.2	1000000	2
IndivQLearningVar/373_37_3	centralized	True	-10	False	GridWorld	Pentagon	PartialObsDiscrete	Individual_Q	0.2	0.2	1000000	3
IndivQLearningVar/374_37_4	centralized	True	-10	False	GridWorld	Pentagon	PartialObsDiscrete	Individual_Q	0.2	0.2	1000000	4
IndivQLearningVar/375_37_5	centralized	True	-10	False	GridWorld	Pentagon	PartialObsDiscrete	Individual_Q	0.2	0.2	1000000	5
IndivQLearningVar/376_37_6	centralized	True	-10	False	GridWorld	Pentagon	PartialObsDiscrete	Individual_Q	0.2	0.2	1000000	6
IndivQLearningVar/377_37_7	centralized	True	-10	False	GridWorld	Pentagon	PartialObsDiscrete	Individual_Q	0.2	0.2	1000000	7
IndivQLearningVar/378_37_8	centralized	True	-10	False	GridWorld	Pentagon	PartialObsDiscrete	Individual_Q	0.2	0.2	1000000	8
IndivQLearningVar/379_37_9	centralized	True	-10	False	GridWorld	Pentagon	PartialObsDiscrete	Individual_Q	0.2	0.2	1000000	9
IndivQLearningVar/380_38_0	centralized	True	-100	False	GridWorld	Pentagon	PartialObsDiscrete	Individual_Q	0.2	0.2	1000000	0
IndivQLearningVar/381_38_1	centralized	True	-100	False	GridWorld	Pentagon	PartialObsDiscrete	Individual_Q	0.2	0.2	1000000	1
IndivQLearningVar/382_38_2	centralized	True	-100	False	GridWorld	Pentagon	PartialObsDiscrete	Individual_Q	0.2	0.2	1000000	2
IndivQLearningVar/383_38_3	centralized	True	-100	False	GridWorld	Pentagon	PartialObsDiscrete	Individual_Q	0.2	0.2	1000000	3
IndivQLearningVar/384_38_4	centralized	True	-100	False	GridWorld	Pentagon	PartialObsDiscrete	Individual_Q	0.2	0.2	1000000	4
IndivQLearningVar/385_38_5	centralized	True	-100	False	GridWorld	Pentagon	PartialObsDiscrete	Individual_Q	0.2	0.2	1000000	5
IndivQLearningVar/386_38_6	centralized	True	-100	False	GridWorld	Pentagon	PartialObsDiscrete	Individual_Q	0.2	0.2	1000000	6
IndivQLearningVar/387_38_7	centralized	True	-100	False	GridWorld	Pentagon	PartialObsDiscrete	Individual_Q	0.2	0.2	1000000	7
IndivQLearningVar/388_38_8	centralized	True	-100	False	GridWorld	Pentagon	PartialObsDiscrete	Individual_Q	0.2	0.2	1000000	8
IndivQLearningVar/389_38_9	centralized	True	-100	False	GridWorld	Pentagon	PartialObsDiscrete	Individual_Q	0.2	0.2	1000000	9
IndivQLearningVar/390_39_0	centralized	False	0	False	GridWorld	Pentagon	PartialObsDiscrete	Individual_Q	0.2	0.01	1000000	0
IndivQLearningVar/391_39_1	centralized	False	0	False	GridWorld	Pentagon	PartialObsDiscrete	Individual_Q	0.2	0.01	1000000	1
IndivQLearningVar/392_39_2	centralized	False	0	False	GridWorld	Pentagon	PartialObsDiscrete	Individual_Q	0.2	0.01	1000000	2
IndivQLearningVar/393_39_3	centralized	False	0	False	GridWorld	Pentagon	PartialObsDiscrete	Individual_Q	0.2	0.01	1000000	3
IndivQLearningVar/394_39_4	centralized	False	0	False	GridWorld	Pentagon	PartialObsDiscrete	Individual_Q	0.2	0.01	1000000	4
IndivQLearningVar/395_39_5	centralized	False	0	False	GridWorld	Pentagon	PartialObsDiscrete	Individual_Q	0.2	0.01	1000000	5
IndivQLearningVar/396_39_6	centralized	False	0	False	GridWorld	Pentagon	PartialObsDiscrete	Individual_Q	0.2	0.01	1000000	6
IndivQLearningVar/397_39_7	centralized	False	0	False	GridWorld	Pentagon	PartialObsDiscrete	Individual_Q	0.2	0.01	1000000	7
IndivQLearningVar/398_39_8	centralized	False	0	False	GridWorld	Pentagon	PartialObsDiscrete	Individual_Q	0.2	0.01	1000000	8
IndivQLearningVar/399_39_9	centralized	False	0	False	GridWorld	Pentagon	PartialObsDiscrete	Individual_Q	0.2	0.01	1000000	9
IndivQLearningVar/400_40_0	centralized	True	-10	False	GridWorld	Pentagon	PartialObsDiscrete	Individual_Q	0.2	0.01	1000000	0
IndivQLearningVar/401_40_1	centralized	True	-10	False	GridWorld	Pentagon	PartialObsDiscrete	Individual_Q	0.2	0.01	1000000	1
IndivQLearningVar/402_40_2	centralized	True	-10	False	GridWorld	Pentagon	PartialObsDiscrete	Individual_Q	0.2	0.01	1000000	2
IndivQLearningVar/403_40_3	centralized	True	-10	False	GridWorld	Pentagon	PartialObsDiscrete	Individual_Q	0.2	0.01	1000000	3
IndivQLearningVar/404_40_4	centralized	True	-10	False	GridWorld	Pentagon	PartialObsDiscrete	Individual_Q	0.2	0.01	1000000	4
IndivQLearningVar/405_40_5	centralized	True	-10	False	GridWorld	Pentagon	PartialObsDiscrete	Individual_Q	0.2	0.01	1000000	5
IndivQLearningVar/406_40_6	centralized	True	-10	False	GridWorld	Pentagon	PartialObsDiscrete	Individual_Q	0.2	0.01	1000000	6
IndivQLearningVar/407_40_7	centralized	True	-10	False	GridWorld	Pentagon	PartialObsDiscrete	Individual_Q	0.2	0.01	1000000	7
IndivQLearningVar/408_40_8	centralized	True	-10	False	GridWorld	Pentagon	PartialObsDiscrete	Individual_Q	0.2	0.01	1000000	8
IndivQLearningVar/409_40_9	centralized	True	-10	False	GridWorld	Pentagon	PartialObsDiscrete	Individual_Q	0.2	0.01	1000000	9
IndivQLearningVar/410_41_0	centralized	True	-100	False	GridWorld	Pentagon	PartialObsDiscrete	Individual_Q	0.2	0.01	1000000	0
IndivQLearningVar/411_41_1	centralized	True	-100	False	GridWorld	Pentagon	PartialObsDiscrete	Individual_Q	0.2	0.01	1000000	1
IndivQLearningVar/412_41_2	centralized	True	-100	False	GridWorld	Pentagon	PartialObsDiscrete	Individual_Q	0.2	0.01	1000000	2
IndivQLearningVar/413_41_3	centralized	True	-100	False	GridWorld	Pentagon	PartialObsDiscrete	Individual_Q	0.2	0.01	1000000	3
IndivQLearningVar/414_41_4	centralized	True	-100	False	GridWorld	Pentagon	PartialObsDiscrete	Individual_Q	0.2	0.01	1000000	4
IndivQLearningVar/415_41_5	centralized	True	-100	False	GridWorld	Pentagon	PartialObsDiscrete	Individual_Q	0.2	0.01	1000000	5
IndivQLearningVar/416_41_6	centralized	True	-100	False	GridWorld	Pentagon	PartialObsDiscrete	Individual_Q	0.2	0.01	1000000	6
IndivQLearningVar/417_41_7	centralized	True	-100	False	GridWorld	Pentagon	PartialObsDiscrete	Individual_Q	0.2	0.01	1000000	7
IndivQLearningVar/418_41_8	centralized	True	-100	False	GridWorld	Pentagon	PartialObsDiscrete	Individual_Q	0.2	0.01	1000000	8
IndivQLearningVar/419_41_9	centralized	True	-100	False	GridWorld	Pentagon	PartialObsDiscrete	Individual_Q	0.2	0.01	1000000	9
IndivQLearningVar/420_42_0	centralized	False	0	False	GridWorld	Pentagon	FullObsDiscrete	Individual_Q	0.2	0.2	1000000	0
IndivQLearningVar/421_42_1	centralized	False	0	False	GridWorld	Pentagon	FullObsDiscrete	Individual_Q	0.2	0.2	1000000	1
IndivQLearningVar/422_42_2	centralized	False	0	False	GridWorld	Pentagon	FullObsDiscrete	Individual_Q	0.2	0.2	1000000	2
IndivQLearningVar/423_42_3	centralized	False	0	False	GridWorld	Pentagon	FullObsDiscrete	Individual_Q	0.2	0.2	1000000	3
IndivQLearningVar/424_42_4	centralized	False	0	False	GridWorld	Pentagon	FullObsDiscrete	Individual_Q	0.2	0.2	1000000	4
IndivQLearningVar/425_42_5	centralized	False	0	False	GridWorld	Pentagon	FullObsDiscrete	Individual_Q	0.2	0.2	1000000	5
IndivQLearningVar/426_42_6	centralized	False	0	False	GridWorld	Pentagon	FullObsDiscrete	Individual_Q	0.2	0.2	1000000	6
IndivQLearningVar/427_42_7	centralized	False	0	False	GridWorld	Pentagon	FullObsDiscrete	Individual_Q	0.2	0.2	1000000	7
IndivQLearningVar/428_42_8	centralized	False	0	False	GridWorld	Pentagon	FullObsDiscrete	Individual_Q	0.2	0.2	1000000	8
IndivQLearningVar/429_42_9	centralized	False	0	False	GridWorld	Pentagon	FullObsDiscrete	Individual_Q	0.2	0.2	1000000	9
IndivQLearningVar/430_43_0	centralized	True	-10	False	GridWorld	Pentagon	FullObsDiscrete	Individual_Q	0.2	0.2	1000000	0
IndivQLearningVar/431_43_1	centralized	True	-10	False	GridWorld	Pentagon	FullObsDiscrete	Individual_Q	0.2	0.2	1000000	1
IndivQLearningVar/432_43_2	centralized	True	-10	False	GridWorld	Pentagon	FullObsDiscrete	Individual_Q	0.2	0.2	1000000	2
IndivQLearningVar/433_43_3	centralized	True	-10	False	GridWorld	Pentagon	FullObsDiscrete	Individual_Q	0.2	0.2	1000000	3
IndivQLearningVar/434_43_4	centralized	True	-10	False	GridWorld	Pentagon	FullObsDiscrete	Individual_Q	0.2	0.2	1000000	4
IndivQLearningVar/435_43_5	centralized	True	-10	False	GridWorld	Pentagon	FullObsDiscrete	Individual_Q	0.2	0.2	1000000	5
IndivQLearningVar/436_43_6	centralized	True	-10	False	GridWorld	Pentagon	FullObsDiscrete	Individual_Q	0.2	0.2	1000000	6
IndivQLearningVar/437_43_7	centralized	True	-10	False	GridWorld	Pentagon	FullObsDiscrete	Individual_Q	0.2	0.2	1000000	7
IndivQLearningVar/438_43_8	centralized	True	-10	False	GridWorld	Pentagon	FullObsDiscrete	Individual_Q	0.2	0.2	1000000	8
IndivQLearningVar/439_43_9	centralized	True	-10	False	GridWorld	Pentagon	FullObsDiscrete	Individual_Q	0.2	0.2	1000000	9
IndivQLearningVar/440_44_0	centralized	True	-100	False	GridWorld	Pentagon	FullObsDiscrete	Individual_Q	0.2	0.2	1000000	0
IndivQLearningVar/441_44_1	centralized	True	-100	False	GridWorld	Pentagon	FullObsDiscrete	Individual_Q	0.2	0.2	1000000	1
IndivQLearningVar/442_44_2	centralized	True	-100	False	GridWorld	Pentagon	FullObsDiscrete	Individual_Q	0.2	0.2	1000000	2
IndivQLearningVar/443_44_3	centralized	True	-100	False	GridWorld	Pentagon	FullObsDiscrete	Individual_Q	0.2	0.2	1000000	3
IndivQLearningVar/444_44_4	centralized	True	-100	False	GridWorld	Pentagon	FullObsDiscrete	Individual_Q	0.2	0.2	1000000	4
IndivQLearningVar/445_44_5	centralized	True	-100	False	GridWorld	Pentagon	FullObsDiscrete	Individual_Q	0.2	0.2	1000000	5
IndivQLearningVar/446_44_6	centralized	True	-100	False	GridWorld	Pentagon	FullObsDiscrete	Individual_Q	0.2	0.2	1000000	6
IndivQLearningVar/447_44_7	centralized	True	-100	False	GridWorld	Pentagon	FullObsDiscrete	Individual_Q	0.2	0.2	1000000	7
IndivQLearningVar/448_44_8	centralized	True	-100	False	GridWorld	Pentagon	FullObsDiscrete	Individual_Q	0.2	0.2	1000000	8
IndivQLearningVar/449_44_9	centralized	True	-100	False	GridWorld	Pentagon	FullObsDiscrete	Individual_Q	0.2	0.2	1000000	9
IndivQLearningVar/450_45_0	centralized	False	0	False	GridWorld	Pentagon	FullObsDiscrete	Individual_Q	0.2	0.01	1000000	0
IndivQLearningVar/451_45_1	centralized	False	0	False	GridWorld	Pentagon	FullObsDiscrete	Individual_Q	0.2	0.01	1000000	1
IndivQLearningVar/452_45_2	centralized	False	0	False	GridWorld	Pentagon	FullObsDiscrete	Individual_Q	0.2	0.01	1000000	2
IndivQLearningVar/453_45_3	centralized	False	0	False	GridWorld	Pentagon	FullObsDiscrete	Individual_Q	0.2	0.01	1000000	3
IndivQLearningVar/454_45_4	centralized	False	0	False	GridWorld	Pentagon	FullObsDiscrete	Individual_Q	0.2	0.01	1000000	4
IndivQLearningVar/455_45_5	centralized	False	0	False	GridWorld	Pentagon	FullObsDiscrete	Individual_Q	0.2	0.01	1000000	5
IndivQLearningVar/456_45_6	centralized	False	0	False	GridWorld	Pentagon	FullObsDiscrete	Individual_Q	0.2	0.01	1000000	6
IndivQLearningVar/457_45_7	centralized	False	0	False	GridWorld	Pentagon	FullObsDiscrete	Individual_Q	0.2	0.01	1000000	7
IndivQLearningVar/458_45_8	centralized	False	0	False	GridWorld	Pentagon	FullObsDiscrete	Individual_Q	0.2	0.01	1000000	8
IndivQLearningVar/459_45_9	centralized	False	0	False	GridWorld	Pentagon	FullObsDiscrete	Individual_Q	0.2	0.01	1000000	9
IndivQLearningVar/460_46_0	centralized	True	-10	False	GridWorld	Pentagon	FullObsDiscrete	Individual_Q	0.2	0.01	1000000	0
IndivQLearningVar/461_46_1	centralized	True	-10	False	GridWorld	Pentagon	FullObsDiscrete	Individual_Q	0.2	0.01	1000000	1
IndivQLearningVar/462_46_2	centralized	True	-10	False	GridWorld	Pentagon	FullObsDiscrete	Individual_Q	0.2	0.01	1000000	2
IndivQLearningVar/463_46_3	centralized	True	-10	False	GridWorld	Pentagon	FullObsDiscrete	Individual_Q	0.2	0.01	1000000	3
IndivQLearningVar/464_46_4	centralized	True	-10	False	GridWorld	Pentagon	FullObsDiscrete	Individual_Q	0.2	0.01	1000000	4
IndivQLearningVar/465_46_5	centralized	True	-10	False	GridWorld	Pentagon	FullObsDiscrete	Individual_Q	0.2	0.01	1000000	5
IndivQLearningVar/466_46_6	centralized	True	-10	False	GridWorld	Pentagon	FullObsDiscrete	Individual_Q	0.2	0.01	1000000	6
IndivQLearningVar/467_46_7	centralized	True	-10	False	GridWorld	Pentagon	FullObsDiscrete	Individual_Q	0.2	0.01	1000000	7
IndivQLearningVar/468_46_8	centralized	True	-10	False	GridWorld	Pentagon	FullObsDiscrete	Individual_Q	0.2	0.01	1000000	8
IndivQLearningVar/469_46_9	centralized	True	-10	False	GridWorld	Pentagon	FullObsDiscrete	Individual_Q	0.2	0.01	1000000	9
IndivQLearningVar/470_47_0	centralized	True	-100	False	GridWorld	Pentagon	FullObsDiscrete	Individual_Q	0.2	0.01	1000000	0
IndivQLearningVar/471_47_1	centralized	True	-100	False	GridWorld	Pentagon	FullObsDiscrete	Individual_Q	0.2	0.01	1000000	1
IndivQLearningVar/472_47_2	centralized	True	-100	False	GridWorld	Pentagon	FullObsDiscrete	Individual_Q	0.2	0.01	1000000	2
IndivQLearningVar/473_47_3	centralized	True	-100	False	GridWorld	Pentagon	FullObsDiscrete	Individual_Q	0.2	0.01	1000000	3
IndivQLearningVar/474_47_4	centralized	True	-100	False	GridWorld	Pentagon	FullObsDiscrete	Individual_Q	0.2	0.01	1000000	4
IndivQLearningVar/475_47_5	centralized	True	-100	False	GridWorld	Pentagon	FullObsDiscrete	Individual_Q	0.2	0.01	1000000	5
IndivQLearningVar/476_47_6	centralized	True	-100	False	GridWorld	Pentagon	FullObsDiscrete	Individual_Q	0.2	0.01	1000000	6
IndivQLearningVar/477_47_7	centralized	True	-100	False	GridWorld	Pentagon	FullObsDiscrete	Individual_Q	0.2	0.01	1000000	7
IndivQLearningVar/478_47_8	centralized	True	-100	False	GridWorld	Pentagon	FullObsDiscrete	Individual_Q	0.2	0.01	1000000	8
IndivQLearningVar/479_47_9	centralized	True	-100	False	GridWorld	Pentagon	FullObsDiscrete	Individual_Q	0.2	0.01	1000000	9
IndivQLearningVar/480_48_0	decentralized	False	0	False	GridWorld	Pentagon	PartialObsDiscrete	Individual_Q	0.2	0.2	1000000	0
IndivQLearningVar/481_48_1	decentralized	False	0	False	GridWorld	Pentagon	PartialObsDiscrete	Individual_Q	0.2	0.2	1000000	1
IndivQLearningVar/482_48_2	decentralized	False	0	False	GridWorld	Pentagon	PartialObsDiscrete	Individual_Q	0.2	0.2	1000000	2
IndivQLearningVar/483_48_3	decentralized	False	0	False	GridWorld	Pentagon	PartialObsDiscrete	Individual_Q	0.2	0.2	1000000	3
IndivQLearningVar/484_48_4	decentralized	False	0	False	GridWorld	Pentagon	PartialObsDiscrete	Individual_Q	0.2	0.2	1000000	4
IndivQLearningVar/485_48_5	decentralized	False	0	False	GridWorld	Pentagon	PartialObsDiscrete	Individual_Q	0.2	0.2	1000000	5
IndivQLearningVar/486_48_6	decentralized	False	0	False	GridWorld	Pentagon	PartialObsDiscrete	Individual_Q	0.2	0.2	1000000	6
IndivQLearningVar/487_48_7	decentralized	False	0	False	GridWorld	Pentagon	PartialObsDiscrete	Individual_Q	0.2	0.2	1000000	7
IndivQLearningVar/488_48_8	decentralized	False	0	False	GridWorld	Pentagon	PartialObsDiscrete	Individual_Q	0.2	0.2	1000000	8
IndivQLearningVar/489_48_9	decentralized	False	0	False	GridWorld	Pentagon	PartialObsDiscrete	Individual_Q	0.2	0.2	1000000	9
IndivQLearningVar/490_49_0	decentralized	True	-10	False	GridWorld	Pentagon	PartialObsDiscrete	Individual_Q	0.2	0.2	1000000	0
IndivQLearningVar/491_49_1	decentralized	True	-10	False	GridWorld	Pentagon	PartialObsDiscrete	Individual_Q	0.2	0.2	1000000	1
IndivQLearningVar/492_49_2	decentralized	True	-10	False	GridWorld	Pentagon	PartialObsDiscrete	Individual_Q	0.2	0.2	1000000	2
IndivQLearningVar/493_49_3	decentralized	True	-10	False	GridWorld	Pentagon	PartialObsDiscrete	Individual_Q	0.2	0.2	1000000	3
IndivQLearningVar/494_49_4	decentralized	True	-10	False	GridWorld	Pentagon	PartialObsDiscrete	Individual_Q	0.2	0.2	1000000	4
IndivQLearningVar/495_49_5	decentralized	True	-10	False	GridWorld	Pentagon	PartialObsDiscrete	Individual_Q	0.2	0.2	1000000	5
IndivQLearningVar/496_49_6	decentralized	True	-10	False	GridWorld	Pentagon	PartialObsDiscrete	Individual_Q	0.2	0.2	1000000	6
IndivQLearningVar/497_49_7	decentralized	True	-10	False	GridWorld	Pentagon	PartialObsDiscrete	Individual_Q	0.2	0.2	1000000	7
IndivQLearningVar/498_49_8	decentralized	True	-10	False	GridWorld	Pentagon	PartialObsDiscrete	Individual_Q	0.2	0.2	1000000	8
IndivQLearningVar/499_49_9	decentralized	True	-10	False	GridWorld	Pentagon	PartialObsDiscrete	Individual_Q	0.2	0.2	1000000	9
IndivQLearningVar/500_50_0	decentralized	True	-100	False	GridWorld	Pentagon	PartialObsDiscrete	Individual_Q	0.2	0.2	1000000	0
IndivQLearningVar/501_50_1	decentralized	True	-100	False	GridWorld	Pentagon	PartialObsDiscrete	Individual_Q	0.2	0.2	1000000	1
IndivQLearningVar/502_50_2	decentralized	True	-100	False	GridWorld	Pentagon	PartialObsDiscrete	Individual_Q	0.2	0.2	1000000	2
IndivQLearningVar/503_50_3	decentralized	True	-100	False	GridWorld	Pentagon	PartialObsDiscrete	Individual_Q	0.2	0.2	1000000	3
IndivQLearningVar/504_50_4	decentralized	True	-100	False	GridWorld	Pentagon	PartialObsDiscrete	Individual_Q	0.2	0.2	1000000	4
IndivQLearningVar/505_50_5	decentralized	True	-100	False	GridWorld	Pentagon	PartialObsDiscrete	Individual_Q	0.2	0.2	1000000	5
IndivQLearningVar/506_50_6	decentralized	True	-100	False	GridWorld	Pentagon	PartialObsDiscrete	Individual_Q	0.2	0.2	1000000	6
IndivQLearningVar/507_50_7	decentralized	True	-100	False	GridWorld	Pentagon	PartialObsDiscrete	Individual_Q	0.2	0.2	1000000	7
IndivQLearningVar/508_50_8	decentralized	True	-100	False	GridWorld	Pentagon	PartialObsDiscrete	Individual_Q	0.2	0.2	1000000	8
IndivQLearningVar/509_50_9	decentralized	True	-100	False	GridWorld	Pentagon	PartialObsDiscrete	Individual_Q	0.2	0.2	1000000	9
IndivQLearningVar/510_51_0	decentralized	False	0	False	GridWorld	Pentagon	PartialObsDiscrete	Individual_Q	0.2	0.01	1000000	0
IndivQLearningVar/511_51_1	decentralized	False	0	False	GridWorld	Pentagon	PartialObsDiscrete	Individual_Q	0.2	0.01	1000000	1
IndivQLearningVar/512_51_2	decentralized	False	0	False	GridWorld	Pentagon	PartialObsDiscrete	Individual_Q	0.2	0.01	1000000	2
IndivQLearningVar/513_51_3	decentralized	False	0	False	GridWorld	Pentagon	PartialObsDiscrete	Individual_Q	0.2	0.01	1000000	3
IndivQLearningVar/514_51_4	decentralized	False	0	False	GridWorld	Pentagon	PartialObsDiscrete	Individual_Q	0.2	0.01	1000000	4
IndivQLearningVar/515_51_5	decentralized	False	0	False	GridWorld	Pentagon	PartialObsDiscrete	Individual_Q	0.2	0.01	1000000	5
IndivQLearningVar/516_51_6	decentralized	False	0	False	GridWorld	Pentagon	PartialObsDiscrete	Individual_Q	0.2	0.01	1000000	6
IndivQLearningVar/517_51_7	decentralized	False	0	False	GridWorld	Pentagon	PartialObsDiscrete	Individual_Q	0.2	0.01	1000000	7
IndivQLearningVar/518_51_8	decentralized	False	0	False	GridWorld	Pentagon	PartialObsDiscrete	Individual_Q	0.2	0.01	1000000	8
IndivQLearningVar/519_51_9	decentralized	False	0	False	GridWorld	Pentagon	PartialObsDiscrete	Individual_Q	0.2	0.01	1000000	9
IndivQLearningVar/520_52_0	decentralized	True	-10	False	GridWorld	Pentagon	PartialObsDiscrete	Individual_Q	0.2	0.01	1000000	0
IndivQLearningVar/521_52_1	decentralized	True	-10	False	GridWorld	Pentagon	PartialObsDiscrete	Individual_Q	0.2	0.01	1000000	1
IndivQLearningVar/522_52_2	decentralized	True	-10	False	GridWorld	Pentagon	PartialObsDiscrete	Individual_Q	0.2	0.01	1000000	2
IndivQLearningVar/523_52_3	decentralized	True	-10	False	GridWorld	Pentagon	PartialObsDiscrete	Individual_Q	0.2	0.01	1000000	3
IndivQLearningVar/524_52_4	decentralized	True	-10	False	GridWorld	Pentagon	PartialObsDiscrete	Individual_Q	0.2	0.01	1000000	4
IndivQLearningVar/525_52_5	decentralized	True	-10	False	GridWorld	Pentagon	PartialObsDiscrete	Individual_Q	0.2	0.01	1000000	5
IndivQLearningVar/526_52_6	decentralized	True	-10	False	GridWorld	Pentagon	PartialObsDiscrete	Individual_Q	0.2	0.01	1000000	6
IndivQLearningVar/527_52_7	decentralized	True	-10	False	GridWorld	Pentagon	PartialObsDiscrete	Individual_Q	0.2	0.01	1000000	7
IndivQLearningVar/528_52_8	decentralized	True	-10	False	GridWorld	Pentagon	PartialObsDiscrete	Individual_Q	0.2	0.01	1000000	8
IndivQLearningVar/529_52_9	decentralized	True	-10	False	GridWorld	Pentagon	PartialObsDiscrete	Individual_Q	0.2	0.01	1000000	9
IndivQLearningVar/530_53_0	decentralized	True	-100	False	GridWorld	Pentagon	PartialObsDiscrete	Individual_Q	0.2	0.01	1000000	0
IndivQLearningVar/531_53_1	decentralized	True	-100	False	GridWorld	Pentagon	PartialObsDiscrete	Individual_Q	0.2	0.01	1000000	1
IndivQLearningVar/532_53_2	decentralized	True	-100	False	GridWorld	Pentagon	PartialObsDiscrete	Individual_Q	0.2	0.01	1000000	2
IndivQLearningVar/533_53_3	decentralized	True	-100	False	GridWorld	Pentagon	PartialObsDiscrete	Individual_Q	0.2	0.01	1000000	3
IndivQLearningVar/534_53_4	decentralized	True	-100	False	GridWorld	Pentagon	PartialObsDiscrete	Individual_Q	0.2	0.01	1000000	4
IndivQLearningVar/535_53_5	decentralized	True	-100	False	GridWorld	Pentagon	PartialObsDiscrete	Individual_Q	0.2	0.01	1000000	5
IndivQLearningVar/536_53_6	decentralized	True	-100	False	GridWorld	Pentagon	PartialObsDiscrete	Individual_Q	0.2	0.01	1000000	6
IndivQLearningVar/537_53_7	decentralized	True	-100	False	GridWorld	Pentagon	PartialObsDiscrete	Individual_Q	0.2	0.01	1000000	7
IndivQLearningVar/538_53_8	decentralized	True	-100	False	GridWorld	Pentagon	PartialObsDiscrete	Individual_Q	0.2	0.01	1000000	8
IndivQLearningVar/539_53_9	decentralized	True	-100	False	GridWorld	Pentagon	PartialObsDiscrete	Individual_Q	0.2	0.01	1000000	9
IndivQLearningVar/540_54_0	decentralized	False	0	False	GridWorld	Pentagon	FullObsDiscrete	Individual_Q	0.2	0.2	1000000	0
IndivQLearningVar/541_54_1	decentralized	False	0	False	GridWorld	Pentagon	FullObsDiscrete	Individual_Q	0.2	0.2	1000000	1
IndivQLearningVar/542_54_2	decentralized	False	0	False	GridWorld	Pentagon	FullObsDiscrete	Individual_Q	0.2	0.2	1000000	2
IndivQLearningVar/543_54_3	decentralized	False	0	False	GridWorld	Pentagon	FullObsDiscrete	Individual_Q	0.2	0.2	1000000	3
IndivQLearningVar/544_54_4	decentralized	False	0	False	GridWorld	Pentagon	FullObsDiscrete	Individual_Q	0.2	0.2	1000000	4
IndivQLearningVar/545_54_5	decentralized	False	0	False	GridWorld	Pentagon	FullObsDiscrete	Individual_Q	0.2	0.2	1000000	5
IndivQLearningVar/546_54_6	decentralized	False	0	False	GridWorld	Pentagon	FullObsDiscrete	Individual_Q	0.2	0.2	1000000	6
IndivQLearningVar/547_54_7	decentralized	False	0	False	GridWorld	Pentagon	FullObsDiscrete	Individual_Q	0.2	0.2	1000000	7
IndivQLearningVar/548_54_8	decentralized	False	0	False	GridWorld	Pentagon	FullObsDiscrete	Individual_Q	0.2	0.2	1000000	8
IndivQLearningVar/549_54_9	decentralized	False	0	False	GridWorld	Pentagon	FullObsDiscrete	Individual_Q	0.2	0.2	1000000	9
IndivQLearningVar/550_55_0	decentralized	True	-10	False	GridWorld	Pentagon	FullObsDiscrete	Individual_Q	0.2	0.2	1000000	0
IndivQLearningVar/551_55_1	decentralized	True	-10	False	GridWorld	Pentagon	FullObsDiscrete	Individual_Q	0.2	0.2	1000000	1
IndivQLearningVar/552_55_2	decentralized	True	-10	False	GridWorld	Pentagon	FullObsDiscrete	Individual_Q	0.2	0.2	1000000	2
IndivQLearningVar/553_55_3	decentralized	True	-10	False	GridWorld	Pentagon	FullObsDiscrete	Individual_Q	0.2	0.2	1000000	3
IndivQLearningVar/554_55_4	decentralized	True	-10	False	GridWorld	Pentagon	FullObsDiscrete	Individual_Q	0.2	0.2	1000000	4
IndivQLearningVar/555_55_5	decentralized	True	-10	False	GridWorld	Pentagon	FullObsDiscrete	Individual_Q	0.2	0.2	1000000	5
IndivQLearningVar/556_55_6	decentralized	True	-10	False	GridWorld	Pentagon	FullObsDiscrete	Individual_Q	0.2	0.2	1000000	6
IndivQLearningVar/557_55_7	decentralized	True	-10	False	GridWorld	Pentagon	FullObsDiscrete	Individual_Q	0.2	0.2	1000000	7
IndivQLearningVar/558_55_8	decentralized	True	-10	False	GridWorld	Pentagon	FullObsDiscrete	Individual_Q	0.2	0.2	1000000	8
IndivQLearningVar/559_55_9	decentralized	True	-10	False	GridWorld	Pentagon	FullObsDiscrete	Individual_Q	0.2	0.2	1000000	9
IndivQLearningVar/560_56_0	decentralized	True	-100	False	GridWorld	Pentagon	FullObsDiscrete	Individual_Q	0.2	0.2	1000000	0
IndivQLearningVar/561_56_1	decentralized	True	-100	False	GridWorld	Pentagon	FullObsDiscrete	Individual_Q	0.2	0.2	1000000	1
IndivQLearningVar/562_56_2	decentralized	True	-100	False	GridWorld	Pentagon	FullObsDiscrete	Individual_Q	0.2	0.2	1000000	2
IndivQLearningVar/563_56_3	decentralized	True	-100	False	GridWorld	Pentagon	FullObsDiscrete	Individual_Q	0.2	0.2	1000000	3
IndivQLearningVar/564_56_4	decentralized	True	-100	False	GridWorld	Pentagon	FullObsDiscrete	Individual_Q	0.2	0.2	1000000	4
IndivQLearningVar/565_56_5	decentralized	True	-100	False	GridWorld	Pentagon	FullObsDiscrete	Individual_Q	0.2	0.2	1000000	5
IndivQLearningVar/566_56_6	decentralized	True	-100	False	GridWorld	Pentagon	FullObsDiscrete	Individual_Q	0.2	0.2	1000000	6
IndivQLearningVar/567_56_7	decentralized	True	-100	False	GridWorld	Pentagon	FullObsDiscrete	Individual_Q	0.2	0.2	1000000	7
IndivQLearningVar/568_56_8	decentralized	True	-100	False	GridWorld	Pentagon	FullObsDiscrete	Individual_Q	0.2	0.2	1000000	8
IndivQLearningVar/569_56_9	decentralized	True	-100	False	GridWorld	Pentagon	FullObsDiscrete	Individual_Q	0.2	0.2	1000000	9
IndivQLearningVar/570_57_0	decentralized	False	0	False	GridWorld	Pentagon	FullObsDiscrete	Individual_Q	0.2	0.01	1000000	0
IndivQLearningVar/571_57_1	decentralized	False	0	False	GridWorld	Pentagon	FullObsDiscrete	Individual_Q	0.2	0.01	1000000	1
IndivQLearningVar/572_57_2	decentralized	False	0	False	GridWorld	Pentagon	FullObsDiscrete	Individual_Q	0.2	0.01	1000000	2
IndivQLearningVar/573_57_3	decentralized	False	0	False	GridWorld	Pentagon	FullObsDiscrete	Individual_Q	0.2	0.01	1000000	3
IndivQLearningVar/574_57_4	decentralized	False	0	False	GridWorld	Pentagon	FullObsDiscrete	Individual_Q	0.2	0.01	1000000	4
IndivQLearningVar/575_57_5	decentralized	False	0	False	GridWorld	Pentagon	FullObsDiscrete	Individual_Q	0.2	0.01	1000000	5
IndivQLearningVar/576_57_6	decentralized	False	0	False	GridWorld	Pentagon	FullObsDiscrete	Individual_Q	0.2	0.01	1000000	6
IndivQLearningVar/577_57_7	decentralized	False	0	False	GridWorld	Pentagon	FullObsDiscrete	Individual_Q	0.2	0.01	1000000	7
IndivQLearningVar/578_57_8	decentralized	False	0	False	GridWorld	Pentagon	FullObsDiscrete	Individual_Q	0.2	0.01	1000000	8
IndivQLearningVar/579_57_9	decentralized	False	0	False	GridWorld	Pentagon	FullObsDiscrete	Individual_Q	0.2	0.01	1000000	9
IndivQLearningVar/580_58_0	decentralized	True	-10	False	GridWorld	Pentagon	FullObsDiscrete	Individual_Q	0.2	0.01	1000000	0
IndivQLearningVar/581_58_1	decentralized	True	-10	False	GridWorld	Pentagon	FullObsDiscrete	Individual_Q	0.2	0.01	1000000	1
IndivQLearningVar/582_58_2	decentralized	True	-10	False	GridWorld	Pentagon	FullObsDiscrete	Individual_Q	0.2	0.01	1000000	2
IndivQLearningVar/583_58_3	decentralized	True	-10	False	GridWorld	Pentagon	FullObsDiscrete	Individual_Q	0.2	0.01	1000000	3
IndivQLearningVar/584_58_4	decentralized	True	-10	False	GridWorld	Pentagon	FullObsDiscrete	Individual_Q	0.2	0.01	1000000	4
IndivQLearningVar/585_58_5	decentralized	True	-10	False	GridWorld	Pentagon	FullObsDiscrete	Individual_Q	0.2	0.01	1000000	5
IndivQLearningVar/586_58_6	decentralized	True	-10	False	GridWorld	Pentagon	FullObsDiscrete	Individual_Q	0.2	0.01	1000000	6
IndivQLearningVar/587_58_7	decentralized	True	-10	False	GridWorld	Pentagon	FullObsDiscrete	Individual_Q	0.2	0.01	1000000	7
IndivQLearningVar/588_58_8	decentralized	True	-10	False	GridWorld	Pentagon	FullObsDiscrete	Individual_Q	0.2	0.01	1000000	8
IndivQLearningVar/589_58_9	decentralized	True	-10	False	GridWorld	Pentagon	FullObsDiscrete	Individual_Q	0.2	0.01	1000000	9
IndivQLearningVar/590_59_0	decentralized	True	-100	False	GridWorld	Pentagon	FullObsDiscrete	Individual_Q	0.2	0.01	1000000	0
IndivQLearningVar/591_59_1	decentralized	True	-100	False	GridWorld	Pentagon	FullObsDiscrete	Individual_Q	0.2	0.01	1000000	1
IndivQLearningVar/592_59_2	decentralized	True	-100	False	GridWorld	Pentagon	FullObsDiscrete	Individual_Q	0.2	0.01	1000000	2
IndivQLearningVar/593_59_3	decentralized	True	-100	False	GridWorld	Pentagon	FullObsDiscrete	Individual_Q	0.2	0.01	1000000	3
IndivQLearningVar/594_59_4	decentralized	True	-100	False	GridWorld	Pentagon	FullObsDiscrete	Individual_Q	0.2	0.01	1000000	4
IndivQLearningVar/595_59_5	decentralized	True	-100	False	GridWorld	Pentagon	FullObsDiscrete	Individual_Q	0.2	0.01	1000000	5
IndivQLearningVar/596_59_6	decentralized	True	-100	False	GridWorld	Pentagon	FullObsDiscrete	Individual_Q	0.2	0.01	1000000	6
IndivQLearningVar/597_59_7	decentralized	True	-100	False	GridWorld	Pentagon	FullObsDiscrete	Individual_Q	0.2	0.01	1000000	7
IndivQLearningVar/598_59_8	decentralized	True	-100	False	GridWorld	Pentagon	FullObsDiscrete	Individual_Q	0.2	0.01	1000000	8
IndivQLearningVar/599_59_9	decentralized	True	-100	False	GridWorld	Pentagon	FullObsDiscrete	Individual_Q	0.2	0.01	1000000	9
IndivQLearningVar/600_60_0	none	False	0	False	GridWorld	Pentagon	PartialObsDiscrete	Individual_Q	0.2	0.2	1000000	0
IndivQLearningVar/601_60_1	none	False	0	False	GridWorld	Pentagon	PartialObsDiscrete	Individual_Q	0.2	0.2	1000000	1
IndivQLearningVar/602_60_2	none	False	0	False	GridWorld	Pentagon	PartialObsDiscrete	Individual_Q	0.2	0.2	1000000	2
IndivQLearningVar/603_60_3	none	False	0	False	GridWorld	Pentagon	PartialObsDiscrete	Individual_Q	0.2	0.2	1000000	3
IndivQLearningVar/604_60_4	none	False	0	False	GridWorld	Pentagon	PartialObsDiscrete	Individual_Q	0.2	0.2	1000000	4
IndivQLearningVar/605_60_5	none	False	0	False	GridWorld	Pentagon	PartialObsDiscrete	Individual_Q	0.2	0.2	1000000	5
IndivQLearningVar/606_60_6	none	False	0	False	GridWorld	Pentagon	PartialObsDiscrete	Individual_Q	0.2	0.2	1000000	6
IndivQLearningVar/607_60_7	none	False	0	False	GridWorld	Pentagon	PartialObsDiscrete	Individual_Q	0.2	0.2	1000000	7
IndivQLearningVar/608_60_8	none	False	0	False	GridWorld	Pentagon	PartialObsDiscrete	Individual_Q	0.2	0.2	1000000	8
IndivQLearningVar/609_60_9	none	False	0	False	GridWorld	Pentagon	PartialObsDiscrete	Individual_Q	0.2	0.2	1000000	9
IndivQLearningVar/610_61_0	none	True	-10	False	GridWorld	Pentagon	PartialObsDiscrete	Individual_Q	0.2	0.2	1000000	0
IndivQLearningVar/611_61_1	none	True	-10	False	GridWorld	Pentagon	PartialObsDiscrete	Individual_Q	0.2	0.2	1000000	1
IndivQLearningVar/612_61_2	none	True	-10	False	GridWorld	Pentagon	PartialObsDiscrete	Individual_Q	0.2	0.2	1000000	2
IndivQLearningVar/613_61_3	none	True	-10	False	GridWorld	Pentagon	PartialObsDiscrete	Individual_Q	0.2	0.2	1000000	3
IndivQLearningVar/614_61_4	none	True	-10	False	GridWorld	Pentagon	PartialObsDiscrete	Individual_Q	0.2	0.2	1000000	4
IndivQLearningVar/615_61_5	none	True	-10	False	GridWorld	Pentagon	PartialObsDiscrete	Individual_Q	0.2	0.2	1000000	5
IndivQLearningVar/616_61_6	none	True	-10	False	GridWorld	Pentagon	PartialObsDiscrete	Individual_Q	0.2	0.2	1000000	6
IndivQLearningVar/617_61_7	none	True	-10	False	GridWorld	Pentagon	PartialObsDiscrete	Individual_Q	0.2	0.2	1000000	7
IndivQLearningVar/618_61_8	none	True	-10	False	GridWorld	Pentagon	PartialObsDiscrete	Individual_Q	0.2	0.2	1000000	8
IndivQLearningVar/619_61_9	none	True	-10	False	GridWorld	Pentagon	PartialObsDiscrete	Individual_Q	0.2	0.2	1000000	9
IndivQLearningVar/620_62_0	none	True	-100	False	GridWorld	Pentagon	PartialObsDiscrete	Individual_Q	0.2	0.2	1000000	0
IndivQLearningVar/621_62_1	none	True	-100	False	GridWorld	Pentagon	PartialObsDiscrete	Individual_Q	0.2	0.2	1000000	1
IndivQLearningVar/622_62_2	none	True	-100	False	GridWorld	Pentagon	PartialObsDiscrete	Individual_Q	0.2	0.2	1000000	2
IndivQLearningVar/623_62_3	none	True	-100	False	GridWorld	Pentagon	PartialObsDiscrete	Individual_Q	0.2	0.2	1000000	3
IndivQLearningVar/624_62_4	none	True	-100	False	GridWorld	Pentagon	PartialObsDiscrete	Individual_Q	0.2	0.2	1000000	4
IndivQLearningVar/625_62_5	none	True	-100	False	GridWorld	Pentagon	PartialObsDiscrete	Individual_Q	0.2	0.2	1000000	5
IndivQLearningVar/626_62_6	none	True	-100	False	GridWorld	Pentagon	PartialObsDiscrete	Individual_Q	0.2	0.2	1000000	6
IndivQLearningVar/627_62_7	none	True	-100	False	GridWorld	Pentagon	PartialObsDiscrete	Individual_Q	0.2	0.2	1000000	7
IndivQLearningVar/628_62_8	none	True	-100	False	GridWorld	Pentagon	PartialObsDiscrete	Individual_Q	0.2	0.2	1000000	8
IndivQLearningVar/629_62_9	none	True	-100	False	GridWorld	Pentagon	PartialObsDiscrete	Individual_Q	0.2	0.2	1000000	9
IndivQLearningVar/630_63_0	none	False	0	False	GridWorld	Pentagon	PartialObsDiscrete	Individual_Q	0.2	0.01	1000000	0
IndivQLearningVar/631_63_1	none	False	0	False	GridWorld	Pentagon	PartialObsDiscrete	Individual_Q	0.2	0.01	1000000	1
IndivQLearningVar/632_63_2	none	False	0	False	GridWorld	Pentagon	PartialObsDiscrete	Individual_Q	0.2	0.01	1000000	2
IndivQLearningVar/633_63_3	none	False	0	False	GridWorld	Pentagon	PartialObsDiscrete	Individual_Q	0.2	0.01	1000000	3
IndivQLearningVar/634_63_4	none	False	0	False	GridWorld	Pentagon	PartialObsDiscrete	Individual_Q	0.2	0.01	1000000	4
IndivQLearningVar/635_63_5	none	False	0	False	GridWorld	Pentagon	PartialObsDiscrete	Individual_Q	0.2	0.01	1000000	5
IndivQLearningVar/636_63_6	none	False	0	False	GridWorld	Pentagon	PartialObsDiscrete	Individual_Q	0.2	0.01	1000000	6
IndivQLearningVar/637_63_7	none	False	0	False	GridWorld	Pentagon	PartialObsDiscrete	Individual_Q	0.2	0.01	1000000	7
IndivQLearningVar/638_63_8	none	False	0	False	GridWorld	Pentagon	PartialObsDiscrete	Individual_Q	0.2	0.01	1000000	8
IndivQLearningVar/639_63_9	none	False	0	False	GridWorld	Pentagon	PartialObsDiscrete	Individual_Q	0.2	0.01	1000000	9
IndivQLearningVar/640_64_0	none	True	-10	False	GridWorld	Pentagon	PartialObsDiscrete	Individual_Q	0.2	0.01	1000000	0
IndivQLearningVar/641_64_1	none	True	-10	False	GridWorld	Pentagon	PartialObsDiscrete	Individual_Q	0.2	0.01	1000000	1
IndivQLearningVar/642_64_2	none	True	-10	False	GridWorld	Pentagon	PartialObsDiscrete	Individual_Q	0.2	0.01	1000000	2
IndivQLearningVar/643_64_3	none	True	-10	False	GridWorld	Pentagon	PartialObsDiscrete	Individual_Q	0.2	0.01	1000000	3
IndivQLearningVar/644_64_4	none	True	-10	False	GridWorld	Pentagon	PartialObsDiscrete	Individual_Q	0.2	0.01	1000000	4
IndivQLearningVar/645_64_5	none	True	-10	False	GridWorld	Pentagon	PartialObsDiscrete	Individual_Q	0.2	0.01	1000000	5
IndivQLearningVar/646_64_6	none	True	-10	False	GridWorld	Pentagon	PartialObsDiscrete	Individual_Q	0.2	0.01	1000000	6
IndivQLearningVar/647_64_7	none	True	-10	False	GridWorld	Pentagon	PartialObsDiscrete	Individual_Q	0.2	0.01	1000000	7
IndivQLearningVar/648_64_8	none	True	-10	False	GridWorld	Pentagon	PartialObsDiscrete	Individual_Q	0.2	0.01	1000000	8
IndivQLearningVar/649_64_9	none	True	-10	False	GridWorld	Pentagon	PartialObsDiscrete	Individual_Q	0.2	0.01	1000000	9
IndivQLearningVar/650_65_0	none	True	-100	False	GridWorld	Pentagon	PartialObsDiscrete	Individual_Q	0.2	0.01	1000000	0
IndivQLearningVar/651_65_1	none	True	-100	False	GridWorld	Pentagon	PartialObsDiscrete	Individual_Q	0.2	0.01	1000000	1
IndivQLearningVar/652_65_2	none	True	-100	False	GridWorld	Pentagon	PartialObsDiscrete	Individual_Q	0.2	0.01	1000000	2
IndivQLearningVar/653_65_3	none	True	-100	False	GridWorld	Pentagon	PartialObsDiscrete	Individual_Q	0.2	0.01	1000000	3
IndivQLearningVar/654_65_4	none	True	-100	False	GridWorld	Pentagon	PartialObsDiscrete	Individual_Q	0.2	0.01	1000000	4
IndivQLearningVar/655_65_5	none	True	-100	False	GridWorld	Pentagon	PartialObsDiscrete	Individual_Q	0.2	0.01	1000000	5
IndivQLearningVar/656_65_6	none	True	-100	False	GridWorld	Pentagon	PartialObsDiscrete	Individual_Q	0.2	0.01	1000000	6
IndivQLearningVar/657_65_7	none	True	-100	False	GridWorld	Pentagon	PartialObsDiscrete	Individual_Q	0.2	0.01	1000000	7
IndivQLearningVar/658_65_8	none	True	-100	False	GridWorld	Pentagon	PartialObsDiscrete	Individual_Q	0.2	0.01	1000000	8
IndivQLearningVar/659_65_9	none	True	-100	False	GridWorld	Pentagon	PartialObsDiscrete	Individual_Q	0.2	0.01	1000000	9
IndivQLearningVar/660_66_0	none	False	0	False	GridWorld	Pentagon	FullObsDiscrete	Individual_Q	0.2	0.2	1000000	0
IndivQLearningVar/661_66_1	none	False	0	False	GridWorld	Pentagon	FullObsDiscrete	Individual_Q	0.2	0.2	1000000	1
IndivQLearningVar/662_66_2	none	False	0	False	GridWorld	Pentagon	FullObsDiscrete	Individual_Q	0.2	0.2	1000000	2
IndivQLearningVar/663_66_3	none	False	0	False	GridWorld	Pentagon	FullObsDiscrete	Individual_Q	0.2	0.2	1000000	3
IndivQLearningVar/664_66_4	none	False	0	False	GridWorld	Pentagon	FullObsDiscrete	Individual_Q	0.2	0.2	1000000	4
IndivQLearningVar/665_66_5	none	False	0	False	GridWorld	Pentagon	FullObsDiscrete	Individual_Q	0.2	0.2	1000000	5
IndivQLearningVar/666_66_6	none	False	0	False	GridWorld	Pentagon	FullObsDiscrete	Individual_Q	0.2	0.2	1000000	6
IndivQLearningVar/667_66_7	none	False	0	False	GridWorld	Pentagon	FullObsDiscrete	Individual_Q	0.2	0.2	1000000	7
IndivQLearningVar/668_66_8	none	False	0	False	GridWorld	Pentagon	FullObsDiscrete	Individual_Q	0.2	0.2	1000000	8
IndivQLearningVar/669_66_9	none	False	0	False	GridWorld	Pentagon	FullObsDiscrete	Individual_Q	0.2	0.2	1000000	9
IndivQLearningVar/670_67_0	none	True	-10	False	GridWorld	Pentagon	FullObsDiscrete	Individual_Q	0.2	0.2	1000000	0
IndivQLearningVar/671_67_1	none	True	-10	False	GridWorld	Pentagon	FullObsDiscrete	Individual_Q	0.2	0.2	1000000	1
IndivQLearningVar/672_67_2	none	True	-10	False	GridWorld	Pentagon	FullObsDiscrete	Individual_Q	0.2	0.2	1000000	2
IndivQLearningVar/673_67_3	none	True	-10	False	GridWorld	Pentagon	FullObsDiscrete	Individual_Q	0.2	0.2	1000000	3
IndivQLearningVar/674_67_4	none	True	-10	False	GridWorld	Pentagon	FullObsDiscrete	Individual_Q	0.2	0.2	1000000	4
IndivQLearningVar/675_67_5	none	True	-10	False	GridWorld	Pentagon	FullObsDiscrete	Individual_Q	0.2	0.2	1000000	5
IndivQLearningVar/676_67_6	none	True	-10	False	GridWorld	Pentagon	FullObsDiscrete	Individual_Q	0.2	0.2	1000000	6
IndivQLearningVar/677_67_7	none	True	-10	False	GridWorld	Pentagon	FullObsDiscrete	Individual_Q	0.2	0.2	1000000	7
IndivQLearningVar/678_67_8	none	True	-10	False	GridWorld	Pentagon	FullObsDiscrete	Individual_Q	0.2	0.2	1000000	8
IndivQLearningVar/679_67_9	none	True	-10	False	GridWorld	Pentagon	FullObsDiscrete	Individual_Q	0.2	0.2	1000000	9
IndivQLearningVar/680_68_0	none	True	-100	False	GridWorld	Pentagon	FullObsDiscrete	Individual_Q	0.2	0.2	1000000	0
IndivQLearningVar/681_68_1	none	True	-100	False	GridWorld	Pentagon	FullObsDiscrete	Individual_Q	0.2	0.2	1000000	1
IndivQLearningVar/682_68_2	none	True	-100	False	GridWorld	Pentagon	FullObsDiscrete	Individual_Q	0.2	0.2	1000000	2
IndivQLearningVar/683_68_3	none	True	-100	False	GridWorld	Pentagon	FullObsDiscrete	Individual_Q	0.2	0.2	1000000	3
IndivQLearningVar/684_68_4	none	True	-100	False	GridWorld	Pentagon	FullObsDiscrete	Individual_Q	0.2	0.2	1000000	4
IndivQLearningVar/685_68_5	none	True	-100	False	GridWorld	Pentagon	FullObsDiscrete	Individual_Q	0.2	0.2	1000000	5
IndivQLearningVar/686_68_6	none	True	-100	False	GridWorld	Pentagon	FullObsDiscrete	Individual_Q	0.2	0.2	1000000	6
IndivQLearningVar/687_68_7	none	True	-100	False	GridWorld	Pentagon	FullObsDiscrete	Individual_Q	0.2	0.2	1000000	7
IndivQLearningVar/688_68_8	none	True	-100	False	GridWorld	Pentagon	FullObsDiscrete	Individual_Q	0.2	0.2	1000000	8
IndivQLearningVar/689_68_9	none	True	-100	False	GridWorld	Pentagon	FullObsDiscrete	Individual_Q	0.2	0.2	1000000	9
IndivQLearningVar/690_69_0	none	False	0	False	GridWorld	Pentagon	FullObsDiscrete	Individual_Q	0.2	0.01	1000000	0
IndivQLearningVar/691_69_1	none	False	0	False	GridWorld	Pentagon	FullObsDiscrete	Individual_Q	0.2	0.01	1000000	1
IndivQLearningVar/692_69_2	none	False	0	False	GridWorld	Pentagon	FullObsDiscrete	Individual_Q	0.2	0.01	1000000	2
IndivQLearningVar/693_69_3	none	False	0	False	GridWorld	Pentagon	FullObsDiscrete	Individual_Q	0.2	0.01	1000000	3
IndivQLearningVar/694_69_4	none	False	0	False	GridWorld	Pentagon	FullObsDiscrete	Individual_Q	0.2	0.01	1000000	4
IndivQLearningVar/695_69_5	none	False	0	False	GridWorld	Pentagon	FullObsDiscrete	Individual_Q	0.2	0.01	1000000	5
IndivQLearningVar/696_69_6	none	False	0	False	GridWorld	Pentagon	FullObsDiscrete	Individual_Q	0.2	0.01	1000000	6
IndivQLearningVar/697_69_7	none	False	0	False	GridWorld	Pentagon	FullObsDiscrete	Individual_Q	0.2	0.01	1000000	7
IndivQLearningVar/698_69_8	none	False	0	False	GridWorld	Pentagon	FullObsDiscrete	Individual_Q	0.2	0.01	1000000	8
IndivQLearningVar/699_69_9	none	False	0	False	GridWorld	Pentagon	FullObsDiscrete	Individual_Q	0.2	0.01	1000000	9
IndivQLearningVar/700_70_0	none	True	-10	False	GridWorld	Pentagon	FullObsDiscrete	Individual_Q	0.2	0.01	1000000	0
IndivQLearningVar/701_70_1	none	True	-10	False	GridWorld	Pentagon	FullObsDiscrete	Individual_Q	0.2	0.01	1000000	1
IndivQLearningVar/702_70_2	none	True	-10	False	GridWorld	Pentagon	FullObsDiscrete	Individual_Q	0.2	0.01	1000000	2
IndivQLearningVar/703_70_3	none	True	-10	False	GridWorld	Pentagon	FullObsDiscrete	Individual_Q	0.2	0.01	1000000	3
IndivQLearningVar/704_70_4	none	True	-10	False	GridWorld	Pentagon	FullObsDiscrete	Individual_Q	0.2	0.01	1000000	4
IndivQLearningVar/705_70_5	none	True	-10	False	GridWorld	Pentagon	FullObsDiscrete	Individual_Q	0.2	0.01	1000000	5
IndivQLearningVar/706_70_6	none	True	-10	False	GridWorld	Pentagon	FullObsDiscrete	Individual_Q	0.2	0.01	1000000	6
IndivQLearningVar/707_70_7	none	True	-10	False	GridWorld	Pentagon	FullObsDiscrete	Individual_Q	0.2	0.01	1000000	7
IndivQLearningVar/708_70_8	none	True	-10	False	GridWorld	Pentagon	FullObsDiscrete	Individual_Q	0.2	0.01	1000000	8
IndivQLearningVar/709_70_9	none	True	-10	False	GridWorld	Pentagon	FullObsDiscrete	Individual_Q	0.2	0.01	1000000	9
IndivQLearningVar/710_71_0	none	True	-100	False	GridWorld	Pentagon	FullObsDiscrete	Individual_Q	0.2	0.01	1000000	0
IndivQLearningVar/711_71_1	none	True	-100	False	GridWorld	Pentagon	FullObsDiscrete	Individual_Q	0.2	0.01	1000000	1
IndivQLearningVar/712_71_2	none	True	-100	False	GridWorld	Pentagon	FullObsDiscrete	Individual_Q	0.2	0.01	1000000	2
IndivQLearningVar/713_71_3	none	True	-100	False	GridWorld	Pentagon	FullObsDiscrete	Individual_Q	0.2	0.01	1000000	3
IndivQLearningVar/714_71_4	none	True	-100	False	GridWorld	Pentagon	FullObsDiscrete	Individual_Q	0.2	0.01	1000000	4
IndivQLearningVar/715_71_5	none	True	-100	False	GridWorld	Pentagon	FullObsDiscrete	Individual_Q	0.2	0.01	1000000	5
IndivQLearningVar/716_71_6	none	True	-100	False	GridWorld	Pentagon	FullObsDiscrete	Individual_Q	0.2	0.01	1000000	6
IndivQLearningVar/717_71_7	none	True	-100	False	GridWorld	Pentagon	FullObsDiscrete	Individual_Q	0.2	0.01	1000000	7
IndivQLearningVar/718_71_8	none	True	-100	False	GridWorld	Pentagon	FullObsDiscrete	Individual_Q	0.2	0.01	1000000	8
IndivQLearningVar/719_71_9	none	True	-100	False	GridWorld	Pentagon	FullObsDiscrete	Individual_Q	0.2	0.01	1000000	9
IndivQLearningVar/720_72_0	centralized	False	0	True	GridWorld	ISR	PartialObsDiscrete	Individual_Q	0.2	0.2	1000000	0
IndivQLearningVar/721_72_1	centralized	False	0	True	GridWorld	ISR	PartialObsDiscrete	Individual_Q	0.2	0.2	1000000	1
IndivQLearningVar/722_72_2	centralized	False	0	True	GridWorld	ISR	PartialObsDiscrete	Individual_Q	0.2	0.2	1000000	2
IndivQLearningVar/723_72_3	centralized	False	0	True	GridWorld	ISR	PartialObsDiscrete	Individual_Q	0.2	0.2	1000000	3
IndivQLearningVar/724_72_4	centralized	False	0	True	GridWorld	ISR	PartialObsDiscrete	Individual_Q	0.2	0.2	1000000	4
IndivQLearningVar/725_72_5	centralized	False	0	True	GridWorld	ISR	PartialObsDiscrete	Individual_Q	0.2	0.2	1000000	5
IndivQLearningVar/726_72_6	centralized	False	0	True	GridWorld	ISR	PartialObsDiscrete	Individual_Q	0.2	0.2	1000000	6
IndivQLearningVar/727_72_7	centralized	False	0	True	GridWorld	ISR	PartialObsDiscrete	Individual_Q	0.2	0.2	1000000	7
IndivQLearningVar/728_72_8	centralized	False	0	True	GridWorld	ISR	PartialObsDiscrete	Individual_Q	0.2	0.2	1000000	8
IndivQLearningVar/729_72_9	centralized	False	0	True	GridWorld	ISR	PartialObsDiscrete	Individual_Q	0.2	0.2	1000000	9
IndivQLearningVar/730_73_0	centralized	True	-10	True	GridWorld	ISR	PartialObsDiscrete	Individual_Q	0.2	0.2	1000000	0
IndivQLearningVar/731_73_1	centralized	True	-10	True	GridWorld	ISR	PartialObsDiscrete	Individual_Q	0.2	0.2	1000000	1
IndivQLearningVar/732_73_2	centralized	True	-10	True	GridWorld	ISR	PartialObsDiscrete	Individual_Q	0.2	0.2	1000000	2
IndivQLearningVar/733_73_3	centralized	True	-10	True	GridWorld	ISR	PartialObsDiscrete	Individual_Q	0.2	0.2	1000000	3
IndivQLearningVar/734_73_4	centralized	True	-10	True	GridWorld	ISR	PartialObsDiscrete	Individual_Q	0.2	0.2	1000000	4
IndivQLearningVar/735_73_5	centralized	True	-10	True	GridWorld	ISR	PartialObsDiscrete	Individual_Q	0.2	0.2	1000000	5
IndivQLearningVar/736_73_6	centralized	True	-10	True	GridWorld	ISR	PartialObsDiscrete	Individual_Q	0.2	0.2	1000000	6
IndivQLearningVar/737_73_7	centralized	True	-10	True	GridWorld	ISR	PartialObsDiscrete	Individual_Q	0.2	0.2	1000000	7
IndivQLearningVar/738_73_8	centralized	True	-10	True	GridWorld	ISR	PartialObsDiscrete	Individual_Q	0.2	0.2	1000000	8
IndivQLearningVar/739_73_9	centralized	True	-10	True	GridWorld	ISR	PartialObsDiscrete	Individual_Q	0.2	0.2	1000000	9
IndivQLearningVar/740_74_0	centralized	True	-100	True	GridWorld	ISR	PartialObsDiscrete	Individual_Q	0.2	0.2	1000000	0
IndivQLearningVar/741_74_1	centralized	True	-100	True	GridWorld	ISR	PartialObsDiscrete	Individual_Q	0.2	0.2	1000000	1
IndivQLearningVar/742_74_2	centralized	True	-100	True	GridWorld	ISR	PartialObsDiscrete	Individual_Q	0.2	0.2	1000000	2
IndivQLearningVar/743_74_3	centralized	True	-100	True	GridWorld	ISR	PartialObsDiscrete	Individual_Q	0.2	0.2	1000000	3
IndivQLearningVar/744_74_4	centralized	True	-100	True	GridWorld	ISR	PartialObsDiscrete	Individual_Q	0.2	0.2	1000000	4
IndivQLearningVar/745_74_5	centralized	True	-100	True	GridWorld	ISR	PartialObsDiscrete	Individual_Q	0.2	0.2	1000000	5
IndivQLearningVar/746_74_6	centralized	True	-100	True	GridWorld	ISR	PartialObsDiscrete	Individual_Q	0.2	0.2	1000000	6
IndivQLearningVar/747_74_7	centralized	True	-100	True	GridWorld	ISR	PartialObsDiscrete	Individual_Q	0.2	0.2	1000000	7
IndivQLearningVar/748_74_8	centralized	True	-100	True	GridWorld	ISR	PartialObsDiscrete	Individual_Q	0.2	0.2	1000000	8
IndivQLearningVar/749_74_9	centralized	True	-100	True	GridWorld	ISR	PartialObsDiscrete	Individual_Q	0.2	0.2	1000000	9
IndivQLearningVar/750_75_0	centralized	False	0	True	GridWorld	ISR	PartialObsDiscrete	Individual_Q	0.2	0.01	1000000	0
IndivQLearningVar/751_75_1	centralized	False	0	True	GridWorld	ISR	PartialObsDiscrete	Individual_Q	0.2	0.01	1000000	1
IndivQLearningVar/752_75_2	centralized	False	0	True	GridWorld	ISR	PartialObsDiscrete	Individual_Q	0.2	0.01	1000000	2
IndivQLearningVar/753_75_3	centralized	False	0	True	GridWorld	ISR	PartialObsDiscrete	Individual_Q	0.2	0.01	1000000	3
IndivQLearningVar/754_75_4	centralized	False	0	True	GridWorld	ISR	PartialObsDiscrete	Individual_Q	0.2	0.01	1000000	4
IndivQLearningVar/755_75_5	centralized	False	0	True	GridWorld	ISR	PartialObsDiscrete	Individual_Q	0.2	0.01	1000000	5
IndivQLearningVar/756_75_6	centralized	False	0	True	GridWorld	ISR	PartialObsDiscrete	Individual_Q	0.2	0.01	1000000	6
IndivQLearningVar/757_75_7	centralized	False	0	True	GridWorld	ISR	PartialObsDiscrete	Individual_Q	0.2	0.01	1000000	7
IndivQLearningVar/758_75_8	centralized	False	0	True	GridWorld	ISR	PartialObsDiscrete	Individual_Q	0.2	0.01	1000000	8
IndivQLearningVar/759_75_9	centralized	False	0	True	GridWorld	ISR	PartialObsDiscrete	Individual_Q	0.2	0.01	1000000	9
IndivQLearningVar/760_76_0	centralized	True	-10	True	GridWorld	ISR	PartialObsDiscrete	Individual_Q	0.2	0.01	1000000	0
IndivQLearningVar/761_76_1	centralized	True	-10	True	GridWorld	ISR	PartialObsDiscrete	Individual_Q	0.2	0.01	1000000	1
IndivQLearningVar/762_76_2	centralized	True	-10	True	GridWorld	ISR	PartialObsDiscrete	Individual_Q	0.2	0.01	1000000	2
IndivQLearningVar/763_76_3	centralized	True	-10	True	GridWorld	ISR	PartialObsDiscrete	Individual_Q	0.2	0.01	1000000	3
IndivQLearningVar/764_76_4	centralized	True	-10	True	GridWorld	ISR	PartialObsDiscrete	Individual_Q	0.2	0.01	1000000	4
IndivQLearningVar/765_76_5	centralized	True	-10	True	GridWorld	ISR	PartialObsDiscrete	Individual_Q	0.2	0.01	1000000	5
IndivQLearningVar/766_76_6	centralized	True	-10	True	GridWorld	ISR	PartialObsDiscrete	Individual_Q	0.2	0.01	1000000	6
IndivQLearningVar/767_76_7	centralized	True	-10	True	GridWorld	ISR	PartialObsDiscrete	Individual_Q	0.2	0.01	1000000	7
IndivQLearningVar/768_76_8	centralized	True	-10	True	GridWorld	ISR	PartialObsDiscrete	Individual_Q	0.2	0.01	1000000	8
IndivQLearningVar/769_76_9	centralized	True	-10	True	GridWorld	ISR	PartialObsDiscrete	Individual_Q	0.2	0.01	1000000	9
IndivQLearningVar/770_77_0	centralized	True	-100	True	GridWorld	ISR	PartialObsDiscrete	Individual_Q	0.2	0.01	1000000	0
IndivQLearningVar/771_77_1	centralized	True	-100	True	GridWorld	ISR	PartialObsDiscrete	Individual_Q	0.2	0.01	1000000	1
IndivQLearningVar/772_77_2	centralized	True	-100	True	GridWorld	ISR	PartialObsDiscrete	Individual_Q	0.2	0.01	1000000	2
IndivQLearningVar/773_77_3	centralized	True	-100	True	GridWorld	ISR	PartialObsDiscrete	Individual_Q	0.2	0.01	1000000	3
IndivQLearningVar/774_77_4	centralized	True	-100	True	GridWorld	ISR	PartialObsDiscrete	Individual_Q	0.2	0.01	1000000	4
IndivQLearningVar/775_77_5	centralized	True	-100	True	GridWorld	ISR	PartialObsDiscrete	Individual_Q	0.2	0.01	1000000	5
IndivQLearningVar/776_77_6	centralized	True	-100	True	GridWorld	ISR	PartialObsDiscrete	Individual_Q	0.2	0.01	1000000	6
IndivQLearningVar/777_77_7	centralized	True	-100	True	GridWorld	ISR	PartialObsDiscrete	Individual_Q	0.2	0.01	1000000	7
IndivQLearningVar/778_77_8	centralized	True	-100	True	GridWorld	ISR	PartialObsDiscrete	Individual_Q	0.2	0.01	1000000	8
IndivQLearningVar/779_77_9	centralized	True	-100	True	GridWorld	ISR	PartialObsDiscrete	Individual_Q	0.2	0.01	1000000	9
IndivQLearningVar/780_78_0	centralized	False	0	True	GridWorld	ISR	FullObsDiscrete	Individual_Q	0.2	0.2	1000000	0
IndivQLearningVar/781_78_1	centralized	False	0	True	GridWorld	ISR	FullObsDiscrete	Individual_Q	0.2	0.2	1000000	1
IndivQLearningVar/782_78_2	centralized	False	0	True	GridWorld	ISR	FullObsDiscrete	Individual_Q	0.2	0.2	1000000	2
IndivQLearningVar/783_78_3	centralized	False	0	True	GridWorld	ISR	FullObsDiscrete	Individual_Q	0.2	0.2	1000000	3
IndivQLearningVar/784_78_4	centralized	False	0	True	GridWorld	ISR	FullObsDiscrete	Individual_Q	0.2	0.2	1000000	4
IndivQLearningVar/785_78_5	centralized	False	0	True	GridWorld	ISR	FullObsDiscrete	Individual_Q	0.2	0.2	1000000	5
IndivQLearningVar/786_78_6	centralized	False	0	True	GridWorld	ISR	FullObsDiscrete	Individual_Q	0.2	0.2	1000000	6
IndivQLearningVar/787_78_7	centralized	False	0	True	GridWorld	ISR	FullObsDiscrete	Individual_Q	0.2	0.2	1000000	7
IndivQLearningVar/788_78_8	centralized	False	0	True	GridWorld	ISR	FullObsDiscrete	Individual_Q	0.2	0.2	1000000	8
IndivQLearningVar/789_78_9	centralized	False	0	True	GridWorld	ISR	FullObsDiscrete	Individual_Q	0.2	0.2	1000000	9
IndivQLearningVar/790_79_0	centralized	True	-10	True	GridWorld	ISR	FullObsDiscrete	Individual_Q	0.2	0.2	1000000	0
IndivQLearningVar/791_79_1	centralized	True	-10	True	GridWorld	ISR	FullObsDiscrete	Individual_Q	0.2	0.2	1000000	1
IndivQLearningVar/792_79_2	centralized	True	-10	True	GridWorld	ISR	FullObsDiscrete	Individual_Q	0.2	0.2	1000000	2
IndivQLearningVar/793_79_3	centralized	True	-10	True	GridWorld	ISR	FullObsDiscrete	Individual_Q	0.2	0.2	1000000	3
IndivQLearningVar/794_79_4	centralized	True	-10	True	GridWorld	ISR	FullObsDiscrete	Individual_Q	0.2	0.2	1000000	4
IndivQLearningVar/795_79_5	centralized	True	-10	True	GridWorld	ISR	FullObsDiscrete	Individual_Q	0.2	0.2	1000000	5
IndivQLearningVar/796_79_6	centralized	True	-10	True	GridWorld	ISR	FullObsDiscrete	Individual_Q	0.2	0.2	1000000	6
IndivQLearningVar/797_79_7	centralized	True	-10	True	GridWorld	ISR	FullObsDiscrete	Individual_Q	0.2	0.2	1000000	7
IndivQLearningVar/798_79_8	centralized	True	-10	True	GridWorld	ISR	FullObsDiscrete	Individual_Q	0.2	0.2	1000000	8
IndivQLearningVar/799_79_9	centralized	True	-10	True	GridWorld	ISR	FullObsDiscrete	Individual_Q	0.2	0.2	1000000	9
IndivQLearningVar/800_80_0	centralized	True	-100	True	GridWorld	ISR	FullObsDiscrete	Individual_Q	0.2	0.2	1000000	0
IndivQLearningVar/801_80_1	centralized	True	-100	True	GridWorld	ISR	FullObsDiscrete	Individual_Q	0.2	0.2	1000000	1
IndivQLearningVar/802_80_2	centralized	True	-100	True	GridWorld	ISR	FullObsDiscrete	Individual_Q	0.2	0.2	1000000	2
IndivQLearningVar/803_80_3	centralized	True	-100	True	GridWorld	ISR	FullObsDiscrete	Individual_Q	0.2	0.2	1000000	3
IndivQLearningVar/804_80_4	centralized	True	-100	True	GridWorld	ISR	FullObsDiscrete	Individual_Q	0.2	0.2	1000000	4
IndivQLearningVar/805_80_5	centralized	True	-100	True	GridWorld	ISR	FullObsDiscrete	Individual_Q	0.2	0.2	1000000	5
IndivQLearningVar/806_80_6	centralized	True	-100	True	GridWorld	ISR	FullObsDiscrete	Individual_Q	0.2	0.2	1000000	6
IndivQLearningVar/807_80_7	centralized	True	-100	True	GridWorld	ISR	FullObsDiscrete	Individual_Q	0.2	0.2	1000000	7
IndivQLearningVar/808_80_8	centralized	True	-100	True	GridWorld	ISR	FullObsDiscrete	Individual_Q	0.2	0.2	1000000	8
IndivQLearningVar/809_80_9	centralized	True	-100	True	GridWorld	ISR	FullObsDiscrete	Individual_Q	0.2	0.2	1000000	9
IndivQLearningVar/810_81_0	centralized	False	0	True	GridWorld	ISR	FullObsDiscrete	Individual_Q	0.2	0.01	1000000	0
IndivQLearningVar/811_81_1	centralized	False	0	True	GridWorld	ISR	FullObsDiscrete	Individual_Q	0.2	0.01	1000000	1
IndivQLearningVar/812_81_2	centralized	False	0	True	GridWorld	ISR	FullObsDiscrete	Individual_Q	0.2	0.01	1000000	2
IndivQLearningVar/813_81_3	centralized	False	0	True	GridWorld	ISR	FullObsDiscrete	Individual_Q	0.2	0.01	1000000	3
IndivQLearningVar/814_81_4	centralized	False	0	True	GridWorld	ISR	FullObsDiscrete	Individual_Q	0.2	0.01	1000000	4
IndivQLearningVar/815_81_5	centralized	False	0	True	GridWorld	ISR	FullObsDiscrete	Individual_Q	0.2	0.01	1000000	5
IndivQLearningVar/816_81_6	centralized	False	0	True	GridWorld	ISR	FullObsDiscrete	Individual_Q	0.2	0.01	1000000	6
IndivQLearningVar/817_81_7	centralized	False	0	True	GridWorld	ISR	FullObsDiscrete	Individual_Q	0.2	0.01	1000000	7
IndivQLearningVar/818_81_8	centralized	False	0	True	GridWorld	ISR	FullObsDiscrete	Individual_Q	0.2	0.01	1000000	8
IndivQLearningVar/819_81_9	centralized	False	0	True	GridWorld	ISR	FullObsDiscrete	Individual_Q	0.2	0.01	1000000	9
IndivQLearningVar/820_82_0	centralized	True	-10	True	GridWorld	ISR	FullObsDiscrete	Individual_Q	0.2	0.01	1000000	0
IndivQLearningVar/821_82_1	centralized	True	-10	True	GridWorld	ISR	FullObsDiscrete	Individual_Q	0.2	0.01	1000000	1
IndivQLearningVar/822_82_2	centralized	True	-10	True	GridWorld	ISR	FullObsDiscrete	Individual_Q	0.2	0.01	1000000	2
IndivQLearningVar/823_82_3	centralized	True	-10	True	GridWorld	ISR	FullObsDiscrete	Individual_Q	0.2	0.01	1000000	3
IndivQLearningVar/824_82_4	centralized	True	-10	True	GridWorld	ISR	FullObsDiscrete	Individual_Q	0.2	0.01	1000000	4
IndivQLearningVar/825_82_5	centralized	True	-10	True	GridWorld	ISR	FullObsDiscrete	Individual_Q	0.2	0.01	1000000	5
IndivQLearningVar/826_82_6	centralized	True	-10	True	GridWorld	ISR	FullObsDiscrete	Individual_Q	0.2	0.01	1000000	6
IndivQLearningVar/827_82_7	centralized	True	-10	True	GridWorld	ISR	FullObsDiscrete	Individual_Q	0.2	0.01	1000000	7
IndivQLearningVar/828_82_8	centralized	True	-10	True	GridWorld	ISR	FullObsDiscrete	Individual_Q	0.2	0.01	1000000	8
IndivQLearningVar/829_82_9	centralized	True	-10	True	GridWorld	ISR	FullObsDiscrete	Individual_Q	0.2	0.01	1000000	9
IndivQLearningVar/830_83_0	centralized	True	-100	True	GridWorld	ISR	FullObsDiscrete	Individual_Q	0.2	0.01	1000000	0
IndivQLearningVar/831_83_1	centralized	True	-100	True	GridWorld	ISR	FullObsDiscrete	Individual_Q	0.2	0.01	1000000	1
IndivQLearningVar/832_83_2	centralized	True	-100	True	GridWorld	ISR	FullObsDiscrete	Individual_Q	0.2	0.01	1000000	2
IndivQLearningVar/833_83_3	centralized	True	-100	True	GridWorld	ISR	FullObsDiscrete	Individual_Q	0.2	0.01	1000000	3
IndivQLearningVar/834_83_4	centralized	True	-100	True	GridWorld	ISR	FullObsDiscrete	Individual_Q	0.2	0.01	1000000	4
IndivQLearningVar/835_83_5	centralized	True	-100	True	GridWorld	ISR	FullObsDiscrete	Individual_Q	0.2	0.01	1000000	5
IndivQLearningVar/836_83_6	centralized	True	-100	True	GridWorld	ISR	FullObsDiscrete	Individual_Q	0.2	0.01	1000000	6
IndivQLearningVar/837_83_7	centralized	True	-100	True	GridWorld	ISR	FullObsDiscrete	Individual_Q	0.2	0.01	1000000	7
IndivQLearningVar/838_83_8	centralized	True	-100	True	GridWorld	ISR	FullObsDiscrete	Individual_Q	0.2	0.01	1000000	8
IndivQLearningVar/839_83_9	centralized	True	-100	True	GridWorld	ISR	FullObsDiscrete	Individual_Q	0.2	0.01	1000000	9
IndivQLearningVar/840_84_0	decentralized	False	0	True	GridWorld	ISR	PartialObsDiscrete	Individual_Q	0.2	0.2	1000000	0
IndivQLearningVar/841_84_1	decentralized	False	0	True	GridWorld	ISR	PartialObsDiscrete	Individual_Q	0.2	0.2	1000000	1
IndivQLearningVar/842_84_2	decentralized	False	0	True	GridWorld	ISR	PartialObsDiscrete	Individual_Q	0.2	0.2	1000000	2
IndivQLearningVar/843_84_3	decentralized	False	0	True	GridWorld	ISR	PartialObsDiscrete	Individual_Q	0.2	0.2	1000000	3
IndivQLearningVar/844_84_4	decentralized	False	0	True	GridWorld	ISR	PartialObsDiscrete	Individual_Q	0.2	0.2	1000000	4
IndivQLearningVar/845_84_5	decentralized	False	0	True	GridWorld	ISR	PartialObsDiscrete	Individual_Q	0.2	0.2	1000000	5
IndivQLearningVar/846_84_6	decentralized	False	0	True	GridWorld	ISR	PartialObsDiscrete	Individual_Q	0.2	0.2	1000000	6
IndivQLearningVar/847_84_7	decentralized	False	0	True	GridWorld	ISR	PartialObsDiscrete	Individual_Q	0.2	0.2	1000000	7
IndivQLearningVar/848_84_8	decentralized	False	0	True	GridWorld	ISR	PartialObsDiscrete	Individual_Q	0.2	0.2	1000000	8
IndivQLearningVar/849_84_9	decentralized	False	0	True	GridWorld	ISR	PartialObsDiscrete	Individual_Q	0.2	0.2	1000000	9
IndivQLearningVar/850_85_0	decentralized	True	-10	True	GridWorld	ISR	PartialObsDiscrete	Individual_Q	0.2	0.2	1000000	0
IndivQLearningVar/851_85_1	decentralized	True	-10	True	GridWorld	ISR	PartialObsDiscrete	Individual_Q	0.2	0.2	1000000	1
IndivQLearningVar/852_85_2	decentralized	True	-10	True	GridWorld	ISR	PartialObsDiscrete	Individual_Q	0.2	0.2	1000000	2
IndivQLearningVar/853_85_3	decentralized	True	-10	True	GridWorld	ISR	PartialObsDiscrete	Individual_Q	0.2	0.2	1000000	3
IndivQLearningVar/854_85_4	decentralized	True	-10	True	GridWorld	ISR	PartialObsDiscrete	Individual_Q	0.2	0.2	1000000	4
IndivQLearningVar/855_85_5	decentralized	True	-10	True	GridWorld	ISR	PartialObsDiscrete	Individual_Q	0.2	0.2	1000000	5
IndivQLearningVar/856_85_6	decentralized	True	-10	True	GridWorld	ISR	PartialObsDiscrete	Individual_Q	0.2	0.2	1000000	6
IndivQLearningVar/857_85_7	decentralized	True	-10	True	GridWorld	ISR	PartialObsDiscrete	Individual_Q	0.2	0.2	1000000	7
IndivQLearningVar/858_85_8	decentralized	True	-10	True	GridWorld	ISR	PartialObsDiscrete	Individual_Q	0.2	0.2	1000000	8
IndivQLearningVar/859_85_9	decentralized	True	-10	True	GridWorld	ISR	PartialObsDiscrete	Individual_Q	0.2	0.2	1000000	9
IndivQLearningVar/860_86_0	decentralized	True	-100	True	GridWorld	ISR	PartialObsDiscrete	Individual_Q	0.2	0.2	1000000	0
IndivQLearningVar/861_86_1	decentralized	True	-100	True	GridWorld	ISR	PartialObsDiscrete	Individual_Q	0.2	0.2	1000000	1
IndivQLearningVar/862_86_2	decentralized	True	-100	True	GridWorld	ISR	PartialObsDiscrete	Individual_Q	0.2	0.2	1000000	2
IndivQLearningVar/863_86_3	decentralized	True	-100	True	GridWorld	ISR	PartialObsDiscrete	Individual_Q	0.2	0.2	1000000	3
IndivQLearningVar/864_86_4	decentralized	True	-100	True	GridWorld	ISR	PartialObsDiscrete	Individual_Q	0.2	0.2	1000000	4
IndivQLearningVar/865_86_5	decentralized	True	-100	True	GridWorld	ISR	PartialObsDiscrete	Individual_Q	0.2	0.2	1000000	5
IndivQLearningVar/866_86_6	decentralized	True	-100	True	GridWorld	ISR	PartialObsDiscrete	Individual_Q	0.2	0.2	1000000	6
IndivQLearningVar/867_86_7	decentralized	True	-100	True	GridWorld	ISR	PartialObsDiscrete	Individual_Q	0.2	0.2	1000000	7
IndivQLearningVar/868_86_8	decentralized	True	-100	True	GridWorld	ISR	PartialObsDiscrete	Individual_Q	0.2	0.2	1000000	8
IndivQLearningVar/869_86_9	decentralized	True	-100	True	GridWorld	ISR	PartialObsDiscrete	Individual_Q	0.2	0.2	1000000	9
IndivQLearningVar/870_87_0	decentralized	False	0	True	GridWorld	ISR	PartialObsDiscrete	Individual_Q	0.2	0.01	1000000	0
IndivQLearningVar/871_87_1	decentralized	False	0	True	GridWorld	ISR	PartialObsDiscrete	Individual_Q	0.2	0.01	1000000	1
IndivQLearningVar/872_87_2	decentralized	False	0	True	GridWorld	ISR	PartialObsDiscrete	Individual_Q	0.2	0.01	1000000	2
IndivQLearningVar/873_87_3	decentralized	False	0	True	GridWorld	ISR	PartialObsDiscrete	Individual_Q	0.2	0.01	1000000	3
IndivQLearningVar/874_87_4	decentralized	False	0	True	GridWorld	ISR	PartialObsDiscrete	Individual_Q	0.2	0.01	1000000	4
IndivQLearningVar/875_87_5	decentralized	False	0	True	GridWorld	ISR	PartialObsDiscrete	Individual_Q	0.2	0.01	1000000	5
IndivQLearningVar/876_87_6	decentralized	False	0	True	GridWorld	ISR	PartialObsDiscrete	Individual_Q	0.2	0.01	1000000	6
IndivQLearningVar/877_87_7	decentralized	False	0	True	GridWorld	ISR	PartialObsDiscrete	Individual_Q	0.2	0.01	1000000	7
IndivQLearningVar/878_87_8	decentralized	False	0	True	GridWorld	ISR	PartialObsDiscrete	Individual_Q	0.2	0.01	1000000	8
IndivQLearningVar/879_87_9	decentralized	False	0	True	GridWorld	ISR	PartialObsDiscrete	Individual_Q	0.2	0.01	1000000	9
IndivQLearningVar/880_88_0	decentralized	True	-10	True	GridWorld	ISR	PartialObsDiscrete	Individual_Q	0.2	0.01	1000000	0
IndivQLearningVar/881_88_1	decentralized	True	-10	True	GridWorld	ISR	PartialObsDiscrete	Individual_Q	0.2	0.01	1000000	1
IndivQLearningVar/882_88_2	decentralized	True	-10	True	GridWorld	ISR	PartialObsDiscrete	Individual_Q	0.2	0.01	1000000	2
IndivQLearningVar/883_88_3	decentralized	True	-10	True	GridWorld	ISR	PartialObsDiscrete	Individual_Q	0.2	0.01	1000000	3
IndivQLearningVar/884_88_4	decentralized	True	-10	True	GridWorld	ISR	PartialObsDiscrete	Individual_Q	0.2	0.01	1000000	4
IndivQLearningVar/885_88_5	decentralized	True	-10	True	GridWorld	ISR	PartialObsDiscrete	Individual_Q	0.2	0.01	1000000	5
IndivQLearningVar/886_88_6	decentralized	True	-10	True	GridWorld	ISR	PartialObsDiscrete	Individual_Q	0.2	0.01	1000000	6
IndivQLearningVar/887_88_7	decentralized	True	-10	True	GridWorld	ISR	PartialObsDiscrete	Individual_Q	0.2	0.01	1000000	7
IndivQLearningVar/888_88_8	decentralized	True	-10	True	GridWorld	ISR	PartialObsDiscrete	Individual_Q	0.2	0.01	1000000	8
IndivQLearningVar/889_88_9	decentralized	True	-10	True	GridWorld	ISR	PartialObsDiscrete	Individual_Q	0.2	0.01	1000000	9
IndivQLearningVar/890_89_0	decentralized	True	-100	True	GridWorld	ISR	PartialObsDiscrete	Individual_Q	0.2	0.01	1000000	0
IndivQLearningVar/891_89_1	decentralized	True	-100	True	GridWorld	ISR	PartialObsDiscrete	Individual_Q	0.2	0.01	1000000	1
IndivQLearningVar/892_89_2	decentralized	True	-100	True	GridWorld	ISR	PartialObsDiscrete	Individual_Q	0.2	0.01	1000000	2
IndivQLearningVar/893_89_3	decentralized	True	-100	True	GridWorld	ISR	PartialObsDiscrete	Individual_Q	0.2	0.01	1000000	3
IndivQLearningVar/894_89_4	decentralized	True	-100	True	GridWorld	ISR	PartialObsDiscrete	Individual_Q	0.2	0.01	1000000	4
IndivQLearningVar/895_89_5	decentralized	True	-100	True	GridWorld	ISR	PartialObsDiscrete	Individual_Q	0.2	0.01	1000000	5
IndivQLearningVar/896_89_6	decentralized	True	-100	True	GridWorld	ISR	PartialObsDiscrete	Individual_Q	0.2	0.01	1000000	6
IndivQLearningVar/897_89_7	decentralized	True	-100	True	GridWorld	ISR	PartialObsDiscrete	Individual_Q	0.2	0.01	1000000	7
IndivQLearningVar/898_89_8	decentralized	True	-100	True	GridWorld	ISR	PartialObsDiscrete	Individual_Q	0.2	0.01	1000000	8
IndivQLearningVar/899_89_9	decentralized	True	-100	True	GridWorld	ISR	PartialObsDiscrete	Individual_Q	0.2	0.01	1000000	9
IndivQLearningVar/900_90_0	decentralized	False	0	True	GridWorld	ISR	FullObsDiscrete	Individual_Q	0.2	0.2	1000000	0
IndivQLearningVar/901_90_1	decentralized	False	0	True	GridWorld	ISR	FullObsDiscrete	Individual_Q	0.2	0.2	1000000	1
IndivQLearningVar/902_90_2	decentralized	False	0	True	GridWorld	ISR	FullObsDiscrete	Individual_Q	0.2	0.2	1000000	2
IndivQLearningVar/903_90_3	decentralized	False	0	True	GridWorld	ISR	FullObsDiscrete	Individual_Q	0.2	0.2	1000000	3
IndivQLearningVar/904_90_4	decentralized	False	0	True	GridWorld	ISR	FullObsDiscrete	Individual_Q	0.2	0.2	1000000	4
IndivQLearningVar/905_90_5	decentralized	False	0	True	GridWorld	ISR	FullObsDiscrete	Individual_Q	0.2	0.2	1000000	5
IndivQLearningVar/906_90_6	decentralized	False	0	True	GridWorld	ISR	FullObsDiscrete	Individual_Q	0.2	0.2	1000000	6
IndivQLearningVar/907_90_7	decentralized	False	0	True	GridWorld	ISR	FullObsDiscrete	Individual_Q	0.2	0.2	1000000	7
IndivQLearningVar/908_90_8	decentralized	False	0	True	GridWorld	ISR	FullObsDiscrete	Individual_Q	0.2	0.2	1000000	8
IndivQLearningVar/909_90_9	decentralized	False	0	True	GridWorld	ISR	FullObsDiscrete	Individual_Q	0.2	0.2	1000000	9
IndivQLearningVar/910_91_0	decentralized	True	-10	True	GridWorld	ISR	FullObsDiscrete	Individual_Q	0.2	0.2	1000000	0
IndivQLearningVar/911_91_1	decentralized	True	-10	True	GridWorld	ISR	FullObsDiscrete	Individual_Q	0.2	0.2	1000000	1
IndivQLearningVar/912_91_2	decentralized	True	-10	True	GridWorld	ISR	FullObsDiscrete	Individual_Q	0.2	0.2	1000000	2
IndivQLearningVar/913_91_3	decentralized	True	-10	True	GridWorld	ISR	FullObsDiscrete	Individual_Q	0.2	0.2	1000000	3
IndivQLearningVar/914_91_4	decentralized	True	-10	True	GridWorld	ISR	FullObsDiscrete	Individual_Q	0.2	0.2	1000000	4
IndivQLearningVar/915_91_5	decentralized	True	-10	True	GridWorld	ISR	FullObsDiscrete	Individual_Q	0.2	0.2	1000000	5
IndivQLearningVar/916_91_6	decentralized	True	-10	True	GridWorld	ISR	FullObsDiscrete	Individual_Q	0.2	0.2	1000000	6
IndivQLearningVar/917_91_7	decentralized	True	-10	True	GridWorld	ISR	FullObsDiscrete	Individual_Q	0.2	0.2	1000000	7
IndivQLearningVar/918_91_8	decentralized	True	-10	True	GridWorld	ISR	FullObsDiscrete	Individual_Q	0.2	0.2	1000000	8
IndivQLearningVar/919_91_9	decentralized	True	-10	True	GridWorld	ISR	FullObsDiscrete	Individual_Q	0.2	0.2	1000000	9
IndivQLearningVar/920_92_0	decentralized	True	-100	True	GridWorld	ISR	FullObsDiscrete	Individual_Q	0.2	0.2	1000000	0
IndivQLearningVar/921_92_1	decentralized	True	-100	True	GridWorld	ISR	FullObsDiscrete	Individual_Q	0.2	0.2	1000000	1
IndivQLearningVar/922_92_2	decentralized	True	-100	True	GridWorld	ISR	FullObsDiscrete	Individual_Q	0.2	0.2	1000000	2
IndivQLearningVar/923_92_3	decentralized	True	-100	True	GridWorld	ISR	FullObsDiscrete	Individual_Q	0.2	0.2	1000000	3
IndivQLearningVar/924_92_4	decentralized	True	-100	True	GridWorld	ISR	FullObsDiscrete	Individual_Q	0.2	0.2	1000000	4
IndivQLearningVar/925_92_5	decentralized	True	-100	True	GridWorld	ISR	FullObsDiscrete	Individual_Q	0.2	0.2	1000000	5
IndivQLearningVar/926_92_6	decentralized	True	-100	True	GridWorld	ISR	FullObsDiscrete	Individual_Q	0.2	0.2	1000000	6
IndivQLearningVar/927_92_7	decentralized	True	-100	True	GridWorld	ISR	FullObsDiscrete	Individual_Q	0.2	0.2	1000000	7
IndivQLearningVar/928_92_8	decentralized	True	-100	True	GridWorld	ISR	FullObsDiscrete	Individual_Q	0.2	0.2	1000000	8
IndivQLearningVar/929_92_9	decentralized	True	-100	True	GridWorld	ISR	FullObsDiscrete	Individual_Q	0.2	0.2	1000000	9
IndivQLearningVar/930_93_0	decentralized	False	0	True	GridWorld	ISR	FullObsDiscrete	Individual_Q	0.2	0.01	1000000	0
IndivQLearningVar/931_93_1	decentralized	False	0	True	GridWorld	ISR	FullObsDiscrete	Individual_Q	0.2	0.01	1000000	1
IndivQLearningVar/932_93_2	decentralized	False	0	True	GridWorld	ISR	FullObsDiscrete	Individual_Q	0.2	0.01	1000000	2
IndivQLearningVar/933_93_3	decentralized	False	0	True	GridWorld	ISR	FullObsDiscrete	Individual_Q	0.2	0.01	1000000	3
IndivQLearningVar/934_93_4	decentralized	False	0	True	GridWorld	ISR	FullObsDiscrete	Individual_Q	0.2	0.01	1000000	4
IndivQLearningVar/935_93_5	decentralized	False	0	True	GridWorld	ISR	FullObsDiscrete	Individual_Q	0.2	0.01	1000000	5
IndivQLearningVar/936_93_6	decentralized	False	0	True	GridWorld	ISR	FullObsDiscrete	Individual_Q	0.2	0.01	1000000	6
IndivQLearningVar/937_93_7	decentralized	False	0	True	GridWorld	ISR	FullObsDiscrete	Individual_Q	0.2	0.01	1000000	7
IndivQLearningVar/938_93_8	decentralized	False	0	True	GridWorld	ISR	FullObsDiscrete	Individual_Q	0.2	0.01	1000000	8
IndivQLearningVar/939_93_9	decentralized	False	0	True	GridWorld	ISR	FullObsDiscrete	Individual_Q	0.2	0.01	1000000	9
IndivQLearningVar/940_94_0	decentralized	True	-10	True	GridWorld	ISR	FullObsDiscrete	Individual_Q	0.2	0.01	1000000	0
IndivQLearningVar/941_94_1	decentralized	True	-10	True	GridWorld	ISR	FullObsDiscrete	Individual_Q	0.2	0.01	1000000	1
IndivQLearningVar/942_94_2	decentralized	True	-10	True	GridWorld	ISR	FullObsDiscrete	Individual_Q	0.2	0.01	1000000	2
IndivQLearningVar/943_94_3	decentralized	True	-10	True	GridWorld	ISR	FullObsDiscrete	Individual_Q	0.2	0.01	1000000	3
IndivQLearningVar/944_94_4	decentralized	True	-10	True	GridWorld	ISR	FullObsDiscrete	Individual_Q	0.2	0.01	1000000	4
IndivQLearningVar/945_94_5	decentralized	True	-10	True	GridWorld	ISR	FullObsDiscrete	Individual_Q	0.2	0.01	1000000	5
IndivQLearningVar/946_94_6	decentralized	True	-10	True	GridWorld	ISR	FullObsDiscrete	Individual_Q	0.2	0.01	1000000	6
IndivQLearningVar/947_94_7	decentralized	True	-10	True	GridWorld	ISR	FullObsDiscrete	Individual_Q	0.2	0.01	1000000	7
IndivQLearningVar/948_94_8	decentralized	True	-10	True	GridWorld	ISR	FullObsDiscrete	Individual_Q	0.2	0.01	1000000	8
IndivQLearningVar/949_94_9	decentralized	True	-10	True	GridWorld	ISR	FullObsDiscrete	Individual_Q	0.2	0.01	1000000	9
IndivQLearningVar/950_95_0	decentralized	True	-100	True	GridWorld	ISR	FullObsDiscrete	Individual_Q	0.2	0.01	1000000	0
IndivQLearningVar/951_95_1	decentralized	True	-100	True	GridWorld	ISR	FullObsDiscrete	Individual_Q	0.2	0.01	1000000	1
IndivQLearningVar/952_95_2	decentralized	True	-100	True	GridWorld	ISR	FullObsDiscrete	Individual_Q	0.2	0.01	1000000	2
IndivQLearningVar/953_95_3	decentralized	True	-100	True	GridWorld	ISR	FullObsDiscrete	Individual_Q	0.2	0.01	1000000	3
IndivQLearningVar/954_95_4	decentralized	True	-100	True	GridWorld	ISR	FullObsDiscrete	Individual_Q	0.2	0.01	1000000	4
IndivQLearningVar/955_95_5	decentralized	True	-100	True	GridWorld	ISR	FullObsDiscrete	Individual_Q	0.2	0.01	1000000	5
IndivQLearningVar/956_95_6	decentralized	True	-100	True	GridWorld	ISR	FullObsDiscrete	Individual_Q	0.2	0.01	1000000	6
IndivQLearningVar/957_95_7	decentralized	True	-100	True	GridWorld	ISR	FullObsDiscrete	Individual_Q	0.2	0.01	1000000	7
IndivQLearningVar/958_95_8	decentralized	True	-100	True	GridWorld	ISR	FullObsDiscrete	Individual_Q	0.2	0.01	1000000	8
IndivQLearningVar/959_95_9	decentralized	True	-100	True	GridWorld	ISR	FullObsDiscrete	Individual_Q	0.2	0.01	1000000	9
IndivQLearningVar/960_96_0	none	False	0	True	GridWorld	ISR	PartialObsDiscrete	Individual_Q	0.2	0.2	1000000	0
IndivQLearningVar/961_96_1	none	False	0	True	GridWorld	ISR	PartialObsDiscrete	Individual_Q	0.2	0.2	1000000	1
IndivQLearningVar/962_96_2	none	False	0	True	GridWorld	ISR	PartialObsDiscrete	Individual_Q	0.2	0.2	1000000	2
IndivQLearningVar/963_96_3	none	False	0	True	GridWorld	ISR	PartialObsDiscrete	Individual_Q	0.2	0.2	1000000	3
IndivQLearningVar/964_96_4	none	False	0	True	GridWorld	ISR	PartialObsDiscrete	Individual_Q	0.2	0.2	1000000	4
IndivQLearningVar/965_96_5	none	False	0	True	GridWorld	ISR	PartialObsDiscrete	Individual_Q	0.2	0.2	1000000	5
IndivQLearningVar/966_96_6	none	False	0	True	GridWorld	ISR	PartialObsDiscrete	Individual_Q	0.2	0.2	1000000	6
IndivQLearningVar/967_96_7	none	False	0	True	GridWorld	ISR	PartialObsDiscrete	Individual_Q	0.2	0.2	1000000	7
IndivQLearningVar/968_96_8	none	False	0	True	GridWorld	ISR	PartialObsDiscrete	Individual_Q	0.2	0.2	1000000	8
IndivQLearningVar/969_96_9	none	False	0	True	GridWorld	ISR	PartialObsDiscrete	Individual_Q	0.2	0.2	1000000	9
IndivQLearningVar/970_97_0	none	True	-10	True	GridWorld	ISR	PartialObsDiscrete	Individual_Q	0.2	0.2	1000000	0
IndivQLearningVar/971_97_1	none	True	-10	True	GridWorld	ISR	PartialObsDiscrete	Individual_Q	0.2	0.2	1000000	1
IndivQLearningVar/972_97_2	none	True	-10	True	GridWorld	ISR	PartialObsDiscrete	Individual_Q	0.2	0.2	1000000	2
IndivQLearningVar/973_97_3	none	True	-10	True	GridWorld	ISR	PartialObsDiscrete	Individual_Q	0.2	0.2	1000000	3
IndivQLearningVar/974_97_4	none	True	-10	True	GridWorld	ISR	PartialObsDiscrete	Individual_Q	0.2	0.2	1000000	4
IndivQLearningVar/975_97_5	none	True	-10	True	GridWorld	ISR	PartialObsDiscrete	Individual_Q	0.2	0.2	1000000	5
IndivQLearningVar/976_97_6	none	True	-10	True	GridWorld	ISR	PartialObsDiscrete	Individual_Q	0.2	0.2	1000000	6
IndivQLearningVar/977_97_7	none	True	-10	True	GridWorld	ISR	PartialObsDiscrete	Individual_Q	0.2	0.2	1000000	7
IndivQLearningVar/978_97_8	none	True	-10	True	GridWorld	ISR	PartialObsDiscrete	Individual_Q	0.2	0.2	1000000	8
IndivQLearningVar/979_97_9	none	True	-10	True	GridWorld	ISR	PartialObsDiscrete	Individual_Q	0.2	0.2	1000000	9
IndivQLearningVar/980_98_0	none	True	-100	True	GridWorld	ISR	PartialObsDiscrete	Individual_Q	0.2	0.2	1000000	0
IndivQLearningVar/981_98_1	none	True	-100	True	GridWorld	ISR	PartialObsDiscrete	Individual_Q	0.2	0.2	1000000	1
IndivQLearningVar/982_98_2	none	True	-100	True	GridWorld	ISR	PartialObsDiscrete	Individual_Q	0.2	0.2	1000000	2
IndivQLearningVar/983_98_3	none	True	-100	True	GridWorld	ISR	PartialObsDiscrete	Individual_Q	0.2	0.2	1000000	3
IndivQLearningVar/984_98_4	none	True	-100	True	GridWorld	ISR	PartialObsDiscrete	Individual_Q	0.2	0.2	1000000	4
IndivQLearningVar/985_98_5	none	True	-100	True	GridWorld	ISR	PartialObsDiscrete	Individual_Q	0.2	0.2	1000000	5
IndivQLearningVar/986_98_6	none	True	-100	True	GridWorld	ISR	PartialObsDiscrete	Individual_Q	0.2	0.2	1000000	6
IndivQLearningVar/987_98_7	none	True	-100	True	GridWorld	ISR	PartialObsDiscrete	Individual_Q	0.2	0.2	1000000	7
IndivQLearningVar/988_98_8	none	True	-100	True	GridWorld	ISR	PartialObsDiscrete	Individual_Q	0.2	0.2	1000000	8
IndivQLearningVar/989_98_9	none	True	-100	True	GridWorld	ISR	PartialObsDiscrete	Individual_Q	0.2	0.2	1000000	9
IndivQLearningVar/990_99_0	none	False	0	True	GridWorld	ISR	PartialObsDiscrete	Individual_Q	0.2	0.01	1000000	0
IndivQLearningVar/991_99_1	none	False	0	True	GridWorld	ISR	PartialObsDiscrete	Individual_Q	0.2	0.01	1000000	1
IndivQLearningVar/992_99_2	none	False	0	True	GridWorld	ISR	PartialObsDiscrete	Individual_Q	0.2	0.01	1000000	2
IndivQLearningVar/993_99_3	none	False	0	True	GridWorld	ISR	PartialObsDiscrete	Individual_Q	0.2	0.01	1000000	3
IndivQLearningVar/994_99_4	none	False	0	True	GridWorld	ISR	PartialObsDiscrete	Individual_Q	0.2	0.01	1000000	4
IndivQLearningVar/995_99_5	none	False	0	True	GridWorld	ISR	PartialObsDiscrete	Individual_Q	0.2	0.01	1000000	5
IndivQLearningVar/996_99_6	none	False	0	True	GridWorld	ISR	PartialObsDiscrete	Individual_Q	0.2	0.01	1000000	6
IndivQLearningVar/997_99_7	none	False	0	True	GridWorld	ISR	PartialObsDiscrete	Individual_Q	0.2	0.01	1000000	7
IndivQLearningVar/998_99_8	none	False	0	True	GridWorld	ISR	PartialObsDiscrete	Individual_Q	0.2	0.01	1000000	8
IndivQLearningVar/999_99_9	none	False	0	True	GridWorld	ISR	PartialObsDiscrete	Individual_Q	0.2	0.01	1000000	9
IndivQLearningVar/1000_100_0	none	True	-10	True	GridWorld	ISR	PartialObsDiscrete	Individual_Q	0.2	0.01	1000000	0
IndivQLearningVar/1001_100_1	none	True	-10	True	GridWorld	ISR	PartialObsDiscrete	Individual_Q	0.2	0.01	1000000	1
IndivQLearningVar/1002_100_2	none	True	-10	True	GridWorld	ISR	PartialObsDiscrete	Individual_Q	0.2	0.01	1000000	2
IndivQLearningVar/1003_100_3	none	True	-10	True	GridWorld	ISR	PartialObsDiscrete	Individual_Q	0.2	0.01	1000000	3
IndivQLearningVar/1004_100_4	none	True	-10	True	GridWorld	ISR	PartialObsDiscrete	Individual_Q	0.2	0.01	1000000	4
IndivQLearningVar/1005_100_5	none	True	-10	True	GridWorld	ISR	PartialObsDiscrete	Individual_Q	0.2	0.01	1000000	5
IndivQLearningVar/1006_100_6	none	True	-10	True	GridWorld	ISR	PartialObsDiscrete	Individual_Q	0.2	0.01	1000000	6
IndivQLearningVar/1007_100_7	none	True	-10	True	GridWorld	ISR	PartialObsDiscrete	Individual_Q	0.2	0.01	1000000	7
IndivQLearningVar/1008_100_8	none	True	-10	True	GridWorld	ISR	PartialObsDiscrete	Individual_Q	0.2	0.01	1000000	8
IndivQLearningVar/1009_100_9	none	True	-10	True	GridWorld	ISR	PartialObsDiscrete	Individual_Q	0.2	0.01	1000000	9
IndivQLearningVar/1010_101_0	none	True	-100	True	GridWorld	ISR	PartialObsDiscrete	Individual_Q	0.2	0.01	1000000	0
IndivQLearningVar/1011_101_1	none	True	-100	True	GridWorld	ISR	PartialObsDiscrete	Individual_Q	0.2	0.01	1000000	1
IndivQLearningVar/1012_101_2	none	True	-100	True	GridWorld	ISR	PartialObsDiscrete	Individual_Q	0.2	0.01	1000000	2
IndivQLearningVar/1013_101_3	none	True	-100	True	GridWorld	ISR	PartialObsDiscrete	Individual_Q	0.2	0.01	1000000	3
IndivQLearningVar/1014_101_4	none	True	-100	True	GridWorld	ISR	PartialObsDiscrete	Individual_Q	0.2	0.01	1000000	4
IndivQLearningVar/1015_101_5	none	True	-100	True	GridWorld	ISR	PartialObsDiscrete	Individual_Q	0.2	0.01	1000000	5
IndivQLearningVar/1016_101_6	none	True	-100	True	GridWorld	ISR	PartialObsDiscrete	Individual_Q	0.2	0.01	1000000	6
IndivQLearningVar/1017_101_7	none	True	-100	True	GridWorld	ISR	PartialObsDiscrete	Individual_Q	0.2	0.01	1000000	7
IndivQLearningVar/1018_101_8	none	True	-100	True	GridWorld	ISR	PartialObsDiscrete	Individual_Q	0.2	0.01	1000000	8
IndivQLearningVar/1019_101_9	none	True	-100	True	GridWorld	ISR	PartialObsDiscrete	Individual_Q	0.2	0.01	1000000	9
IndivQLearningVar/1020_102_0	none	False	0	True	GridWorld	ISR	FullObsDiscrete	Individual_Q	0.2	0.2	1000000	0
IndivQLearningVar/1021_102_1	none	False	0	True	GridWorld	ISR	FullObsDiscrete	Individual_Q	0.2	0.2	1000000	1
IndivQLearningVar/1022_102_2	none	False	0	True	GridWorld	ISR	FullObsDiscrete	Individual_Q	0.2	0.2	1000000	2
IndivQLearningVar/1023_102_3	none	False	0	True	GridWorld	ISR	FullObsDiscrete	Individual_Q	0.2	0.2	1000000	3
IndivQLearningVar/1024_102_4	none	False	0	True	GridWorld	ISR	FullObsDiscrete	Individual_Q	0.2	0.2	1000000	4
IndivQLearningVar/1025_102_5	none	False	0	True	GridWorld	ISR	FullObsDiscrete	Individual_Q	0.2	0.2	1000000	5
IndivQLearningVar/1026_102_6	none	False	0	True	GridWorld	ISR	FullObsDiscrete	Individual_Q	0.2	0.2	1000000	6
IndivQLearningVar/1027_102_7	none	False	0	True	GridWorld	ISR	FullObsDiscrete	Individual_Q	0.2	0.2	1000000	7
IndivQLearningVar/1028_102_8	none	False	0	True	GridWorld	ISR	FullObsDiscrete	Individual_Q	0.2	0.2	1000000	8
IndivQLearningVar/1029_102_9	none	False	0	True	GridWorld	ISR	FullObsDiscrete	Individual_Q	0.2	0.2	1000000	9
IndivQLearningVar/1030_103_0	none	True	-10	True	GridWorld	ISR	FullObsDiscrete	Individual_Q	0.2	0.2	1000000	0
IndivQLearningVar/1031_103_1	none	True	-10	True	GridWorld	ISR	FullObsDiscrete	Individual_Q	0.2	0.2	1000000	1
IndivQLearningVar/1032_103_2	none	True	-10	True	GridWorld	ISR	FullObsDiscrete	Individual_Q	0.2	0.2	1000000	2
IndivQLearningVar/1033_103_3	none	True	-10	True	GridWorld	ISR	FullObsDiscrete	Individual_Q	0.2	0.2	1000000	3
IndivQLearningVar/1034_103_4	none	True	-10	True	GridWorld	ISR	FullObsDiscrete	Individual_Q	0.2	0.2	1000000	4
IndivQLearningVar/1035_103_5	none	True	-10	True	GridWorld	ISR	FullObsDiscrete	Individual_Q	0.2	0.2	1000000	5
IndivQLearningVar/1036_103_6	none	True	-10	True	GridWorld	ISR	FullObsDiscrete	Individual_Q	0.2	0.2	1000000	6
IndivQLearningVar/1037_103_7	none	True	-10	True	GridWorld	ISR	FullObsDiscrete	Individual_Q	0.2	0.2	1000000	7
IndivQLearningVar/1038_103_8	none	True	-10	True	GridWorld	ISR	FullObsDiscrete	Individual_Q	0.2	0.2	1000000	8
IndivQLearningVar/1039_103_9	none	True	-10	True	GridWorld	ISR	FullObsDiscrete	Individual_Q	0.2	0.2	1000000	9
IndivQLearningVar/1040_104_0	none	True	-100	True	GridWorld	ISR	FullObsDiscrete	Individual_Q	0.2	0.2	1000000	0
IndivQLearningVar/1041_104_1	none	True	-100	True	GridWorld	ISR	FullObsDiscrete	Individual_Q	0.2	0.2	1000000	1
IndivQLearningVar/1042_104_2	none	True	-100	True	GridWorld	ISR	FullObsDiscrete	Individual_Q	0.2	0.2	1000000	2
IndivQLearningVar/1043_104_3	none	True	-100	True	GridWorld	ISR	FullObsDiscrete	Individual_Q	0.2	0.2	1000000	3
IndivQLearningVar/1044_104_4	none	True	-100	True	GridWorld	ISR	FullObsDiscrete	Individual_Q	0.2	0.2	1000000	4
IndivQLearningVar/1045_104_5	none	True	-100	True	GridWorld	ISR	FullObsDiscrete	Individual_Q	0.2	0.2	1000000	5
IndivQLearningVar/1046_104_6	none	True	-100	True	GridWorld	ISR	FullObsDiscrete	Individual_Q	0.2	0.2	1000000	6
IndivQLearningVar/1047_104_7	none	True	-100	True	GridWorld	ISR	FullObsDiscrete	Individual_Q	0.2	0.2	1000000	7
IndivQLearningVar/1048_104_8	none	True	-100	True	GridWorld	ISR	FullObsDiscrete	Individual_Q	0.2	0.2	1000000	8
IndivQLearningVar/1049_104_9	none	True	-100	True	GridWorld	ISR	FullObsDiscrete	Individual_Q	0.2	0.2	1000000	9
IndivQLearningVar/1050_105_0	none	False	0	True	GridWorld	ISR	FullObsDiscrete	Individual_Q	0.2	0.01	1000000	0
IndivQLearningVar/1051_105_1	none	False	0	True	GridWorld	ISR	FullObsDiscrete	Individual_Q	0.2	0.01	1000000	1
IndivQLearningVar/1052_105_2	none	False	0	True	GridWorld	ISR	FullObsDiscrete	Individual_Q	0.2	0.01	1000000	2
IndivQLearningVar/1053_105_3	none	False	0	True	GridWorld	ISR	FullObsDiscrete	Individual_Q	0.2	0.01	1000000	3
IndivQLearningVar/1054_105_4	none	False	0	True	GridWorld	ISR	FullObsDiscrete	Individual_Q	0.2	0.01	1000000	4
IndivQLearningVar/1055_105_5	none	False	0	True	GridWorld	ISR	FullObsDiscrete	Individual_Q	0.2	0.01	1000000	5
IndivQLearningVar/1056_105_6	none	False	0	True	GridWorld	ISR	FullObsDiscrete	Individual_Q	0.2	0.01	1000000	6
IndivQLearningVar/1057_105_7	none	False	0	True	GridWorld	ISR	FullObsDiscrete	Individual_Q	0.2	0.01	1000000	7
IndivQLearningVar/1058_105_8	none	False	0	True	GridWorld	ISR	FullObsDiscrete	Individual_Q	0.2	0.01	1000000	8
IndivQLearningVar/1059_105_9	none	False	0	True	GridWorld	ISR	FullObsDiscrete	Individual_Q	0.2	0.01	1000000	9
IndivQLearningVar/1060_106_0	none	True	-10	True	GridWorld	ISR	FullObsDiscrete	Individual_Q	0.2	0.01	1000000	0
IndivQLearningVar/1061_106_1	none	True	-10	True	GridWorld	ISR	FullObsDiscrete	Individual_Q	0.2	0.01	1000000	1
IndivQLearningVar/1062_106_2	none	True	-10	True	GridWorld	ISR	FullObsDiscrete	Individual_Q	0.2	0.01	1000000	2
IndivQLearningVar/1063_106_3	none	True	-10	True	GridWorld	ISR	FullObsDiscrete	Individual_Q	0.2	0.01	1000000	3
IndivQLearningVar/1064_106_4	none	True	-10	True	GridWorld	ISR	FullObsDiscrete	Individual_Q	0.2	0.01	1000000	4
IndivQLearningVar/1065_106_5	none	True	-10	True	GridWorld	ISR	FullObsDiscrete	Individual_Q	0.2	0.01	1000000	5
IndivQLearningVar/1066_106_6	none	True	-10	True	GridWorld	ISR	FullObsDiscrete	Individual_Q	0.2	0.01	1000000	6
IndivQLearningVar/1067_106_7	none	True	-10	True	GridWorld	ISR	FullObsDiscrete	Individual_Q	0.2	0.01	1000000	7
IndivQLearningVar/1068_106_8	none	True	-10	True	GridWorld	ISR	FullObsDiscrete	Individual_Q	0.2	0.01	1000000	8
IndivQLearningVar/1069_106_9	none	True	-10	True	GridWorld	ISR	FullObsDiscrete	Individual_Q	0.2	0.01	1000000	9
IndivQLearningVar/1070_107_0	none	True	-100	True	GridWorld	ISR	FullObsDiscrete	Individual_Q	0.2	0.01	1000000	0
IndivQLearningVar/1071_107_1	none	True	-100	True	GridWorld	ISR	FullObsDiscrete	Individual_Q	0.2	0.01	1000000	1
IndivQLearningVar/1072_107_2	none	True	-100	True	GridWorld	ISR	FullObsDiscrete	Individual_Q	0.2	0.01	1000000	2
IndivQLearningVar/1073_107_3	none	True	-100	True	GridWorld	ISR	FullObsDiscrete	Individual_Q	0.2	0.01	1000000	3
IndivQLearningVar/1074_107_4	none	True	-100	True	GridWorld	ISR	FullObsDiscrete	Individual_Q	0.2	0.01	1000000	4
IndivQLearningVar/1075_107_5	none	True	-100	True	GridWorld	ISR	FullObsDiscrete	Individual_Q	0.2	0.01	1000000	5
IndivQLearningVar/1076_107_6	none	True	-100	True	GridWorld	ISR	FullObsDiscrete	Individual_Q	0.2	0.01	1000000	6
IndivQLearningVar/1077_107_7	none	True	-100	True	GridWorld	ISR	FullObsDiscrete	Individual_Q	0.2	0.01	1000000	7
IndivQLearningVar/1078_107_8	none	True	-100	True	GridWorld	ISR	FullObsDiscrete	Individual_Q	0.2	0.01	1000000	8
IndivQLearningVar/1079_107_9	none	True	-100	True	GridWorld	ISR	FullObsDiscrete	Individual_Q	0.2	0.01	1000000	9
IndivQLearningVar/1080_108_0	centralized	False	0	False	GridWorld	ISR	PartialObsDiscrete	Individual_Q	0.2	0.2	1000000	0
IndivQLearningVar/1081_108_1	centralized	False	0	False	GridWorld	ISR	PartialObsDiscrete	Individual_Q	0.2	0.2	1000000	1
IndivQLearningVar/1082_108_2	centralized	False	0	False	GridWorld	ISR	PartialObsDiscrete	Individual_Q	0.2	0.2	1000000	2
IndivQLearningVar/1083_108_3	centralized	False	0	False	GridWorld	ISR	PartialObsDiscrete	Individual_Q	0.2	0.2	1000000	3
IndivQLearningVar/1084_108_4	centralized	False	0	False	GridWorld	ISR	PartialObsDiscrete	Individual_Q	0.2	0.2	1000000	4
IndivQLearningVar/1085_108_5	centralized	False	0	False	GridWorld	ISR	PartialObsDiscrete	Individual_Q	0.2	0.2	1000000	5
IndivQLearningVar/1086_108_6	centralized	False	0	False	GridWorld	ISR	PartialObsDiscrete	Individual_Q	0.2	0.2	1000000	6
IndivQLearningVar/1087_108_7	centralized	False	0	False	GridWorld	ISR	PartialObsDiscrete	Individual_Q	0.2	0.2	1000000	7
IndivQLearningVar/1088_108_8	centralized	False	0	False	GridWorld	ISR	PartialObsDiscrete	Individual_Q	0.2	0.2	1000000	8
IndivQLearningVar/1089_108_9	centralized	False	0	False	GridWorld	ISR	PartialObsDiscrete	Individual_Q	0.2	0.2	1000000	9
IndivQLearningVar/1090_109_0	centralized	True	-10	False	GridWorld	ISR	PartialObsDiscrete	Individual_Q	0.2	0.2	1000000	0
IndivQLearningVar/1091_109_1	centralized	True	-10	False	GridWorld	ISR	PartialObsDiscrete	Individual_Q	0.2	0.2	1000000	1
IndivQLearningVar/1092_109_2	centralized	True	-10	False	GridWorld	ISR	PartialObsDiscrete	Individual_Q	0.2	0.2	1000000	2
IndivQLearningVar/1093_109_3	centralized	True	-10	False	GridWorld	ISR	PartialObsDiscrete	Individual_Q	0.2	0.2	1000000	3
IndivQLearningVar/1094_109_4	centralized	True	-10	False	GridWorld	ISR	PartialObsDiscrete	Individual_Q	0.2	0.2	1000000	4
IndivQLearningVar/1095_109_5	centralized	True	-10	False	GridWorld	ISR	PartialObsDiscrete	Individual_Q	0.2	0.2	1000000	5
IndivQLearningVar/1096_109_6	centralized	True	-10	False	GridWorld	ISR	PartialObsDiscrete	Individual_Q	0.2	0.2	1000000	6
IndivQLearningVar/1097_109_7	centralized	True	-10	False	GridWorld	ISR	PartialObsDiscrete	Individual_Q	0.2	0.2	1000000	7
IndivQLearningVar/1098_109_8	centralized	True	-10	False	GridWorld	ISR	PartialObsDiscrete	Individual_Q	0.2	0.2	1000000	8
IndivQLearningVar/1099_109_9	centralized	True	-10	False	GridWorld	ISR	PartialObsDiscrete	Individual_Q	0.2	0.2	1000000	9
IndivQLearningVar/1100_110_0	centralized	True	-100	False	GridWorld	ISR	PartialObsDiscrete	Individual_Q	0.2	0.2	1000000	0
IndivQLearningVar/1101_110_1	centralized	True	-100	False	GridWorld	ISR	PartialObsDiscrete	Individual_Q	0.2	0.2	1000000	1
IndivQLearningVar/1102_110_2	centralized	True	-100	False	GridWorld	ISR	PartialObsDiscrete	Individual_Q	0.2	0.2	1000000	2
IndivQLearningVar/1103_110_3	centralized	True	-100	False	GridWorld	ISR	PartialObsDiscrete	Individual_Q	0.2	0.2	1000000	3
IndivQLearningVar/1104_110_4	centralized	True	-100	False	GridWorld	ISR	PartialObsDiscrete	Individual_Q	0.2	0.2	1000000	4
IndivQLearningVar/1105_110_5	centralized	True	-100	False	GridWorld	ISR	PartialObsDiscrete	Individual_Q	0.2	0.2	1000000	5
IndivQLearningVar/1106_110_6	centralized	True	-100	False	GridWorld	ISR	PartialObsDiscrete	Individual_Q	0.2	0.2	1000000	6
IndivQLearningVar/1107_110_7	centralized	True	-100	False	GridWorld	ISR	PartialObsDiscrete	Individual_Q	0.2	0.2	1000000	7
IndivQLearningVar/1108_110_8	centralized	True	-100	False	GridWorld	ISR	PartialObsDiscrete	Individual_Q	0.2	0.2	1000000	8
IndivQLearningVar/1109_110_9	centralized	True	-100	False	GridWorld	ISR	PartialObsDiscrete	Individual_Q	0.2	0.2	1000000	9
IndivQLearningVar/1110_111_0	centralized	False	0	False	GridWorld	ISR	PartialObsDiscrete	Individual_Q	0.2	0.01	1000000	0
IndivQLearningVar/1111_111_1	centralized	False	0	False	GridWorld	ISR	PartialObsDiscrete	Individual_Q	0.2	0.01	1000000	1
IndivQLearningVar/1112_111_2	centralized	False	0	False	GridWorld	ISR	PartialObsDiscrete	Individual_Q	0.2	0.01	1000000	2
IndivQLearningVar/1113_111_3	centralized	False	0	False	GridWorld	ISR	PartialObsDiscrete	Individual_Q	0.2	0.01	1000000	3
IndivQLearningVar/1114_111_4	centralized	False	0	False	GridWorld	ISR	PartialObsDiscrete	Individual_Q	0.2	0.01	1000000	4
IndivQLearningVar/1115_111_5	centralized	False	0	False	GridWorld	ISR	PartialObsDiscrete	Individual_Q	0.2	0.01	1000000	5
IndivQLearningVar/1116_111_6	centralized	False	0	False	GridWorld	ISR	PartialObsDiscrete	Individual_Q	0.2	0.01	1000000	6
IndivQLearningVar/1117_111_7	centralized	False	0	False	GridWorld	ISR	PartialObsDiscrete	Individual_Q	0.2	0.01	1000000	7
IndivQLearningVar/1118_111_8	centralized	False	0	False	GridWorld	ISR	PartialObsDiscrete	Individual_Q	0.2	0.01	1000000	8
IndivQLearningVar/1119_111_9	centralized	False	0	False	GridWorld	ISR	PartialObsDiscrete	Individual_Q	0.2	0.01	1000000	9
IndivQLearningVar/1120_112_0	centralized	True	-10	False	GridWorld	ISR	PartialObsDiscrete	Individual_Q	0.2	0.01	1000000	0
IndivQLearningVar/1121_112_1	centralized	True	-10	False	GridWorld	ISR	PartialObsDiscrete	Individual_Q	0.2	0.01	1000000	1
IndivQLearningVar/1122_112_2	centralized	True	-10	False	GridWorld	ISR	PartialObsDiscrete	Individual_Q	0.2	0.01	1000000	2
IndivQLearningVar/1123_112_3	centralized	True	-10	False	GridWorld	ISR	PartialObsDiscrete	Individual_Q	0.2	0.01	1000000	3
IndivQLearningVar/1124_112_4	centralized	True	-10	False	GridWorld	ISR	PartialObsDiscrete	Individual_Q	0.2	0.01	1000000	4
IndivQLearningVar/1125_112_5	centralized	True	-10	False	GridWorld	ISR	PartialObsDiscrete	Individual_Q	0.2	0.01	1000000	5
IndivQLearningVar/1126_112_6	centralized	True	-10	False	GridWorld	ISR	PartialObsDiscrete	Individual_Q	0.2	0.01	1000000	6
IndivQLearningVar/1127_112_7	centralized	True	-10	False	GridWorld	ISR	PartialObsDiscrete	Individual_Q	0.2	0.01	1000000	7
IndivQLearningVar/1128_112_8	centralized	True	-10	False	GridWorld	ISR	PartialObsDiscrete	Individual_Q	0.2	0.01	1000000	8
IndivQLearningVar/1129_112_9	centralized	True	-10	False	GridWorld	ISR	PartialObsDiscrete	Individual_Q	0.2	0.01	1000000	9
IndivQLearningVar/1130_113_0	centralized	True	-100	False	GridWorld	ISR	PartialObsDiscrete	Individual_Q	0.2	0.01	1000000	0
IndivQLearningVar/1131_113_1	centralized	True	-100	False	GridWorld	ISR	PartialObsDiscrete	Individual_Q	0.2	0.01	1000000	1
IndivQLearningVar/1132_113_2	centralized	True	-100	False	GridWorld	ISR	PartialObsDiscrete	Individual_Q	0.2	0.01	1000000	2
IndivQLearningVar/1133_113_3	centralized	True	-100	False	GridWorld	ISR	PartialObsDiscrete	Individual_Q	0.2	0.01	1000000	3
IndivQLearningVar/1134_113_4	centralized	True	-100	False	GridWorld	ISR	PartialObsDiscrete	Individual_Q	0.2	0.01	1000000	4
IndivQLearningVar/1135_113_5	centralized	True	-100	False	GridWorld	ISR	PartialObsDiscrete	Individual_Q	0.2	0.01	1000000	5
IndivQLearningVar/1136_113_6	centralized	True	-100	False	GridWorld	ISR	PartialObsDiscrete	Individual_Q	0.2	0.01	1000000	6
IndivQLearningVar/1137_113_7	centralized	True	-100	False	GridWorld	ISR	PartialObsDiscrete	Individual_Q	0.2	0.01	1000000	7
IndivQLearningVar/1138_113_8	centralized	True	-100	False	GridWorld	ISR	PartialObsDiscrete	Individual_Q	0.2	0.01	1000000	8
IndivQLearningVar/1139_113_9	centralized	True	-100	False	GridWorld	ISR	PartialObsDiscrete	Individual_Q	0.2	0.01	1000000	9
IndivQLearningVar/1140_114_0	centralized	False	0	False	GridWorld	ISR	FullObsDiscrete	Individual_Q	0.2	0.2	1000000	0
IndivQLearningVar/1141_114_1	centralized	False	0	False	GridWorld	ISR	FullObsDiscrete	Individual_Q	0.2	0.2	1000000	1
IndivQLearningVar/1142_114_2	centralized	False	0	False	GridWorld	ISR	FullObsDiscrete	Individual_Q	0.2	0.2	1000000	2
IndivQLearningVar/1143_114_3	centralized	False	0	False	GridWorld	ISR	FullObsDiscrete	Individual_Q	0.2	0.2	1000000	3
IndivQLearningVar/1144_114_4	centralized	False	0	False	GridWorld	ISR	FullObsDiscrete	Individual_Q	0.2	0.2	1000000	4
IndivQLearningVar/1145_114_5	centralized	False	0	False	GridWorld	ISR	FullObsDiscrete	Individual_Q	0.2	0.2	1000000	5
IndivQLearningVar/1146_114_6	centralized	False	0	False	GridWorld	ISR	FullObsDiscrete	Individual_Q	0.2	0.2	1000000	6
IndivQLearningVar/1147_114_7	centralized	False	0	False	GridWorld	ISR	FullObsDiscrete	Individual_Q	0.2	0.2	1000000	7
IndivQLearningVar/1148_114_8	centralized	False	0	False	GridWorld	ISR	FullObsDiscrete	Individual_Q	0.2	0.2	1000000	8
IndivQLearningVar/1149_114_9	centralized	False	0	False	GridWorld	ISR	FullObsDiscrete	Individual_Q	0.2	0.2	1000000	9
IndivQLearningVar/1150_115_0	centralized	True	-10	False	GridWorld	ISR	FullObsDiscrete	Individual_Q	0.2	0.2	1000000	0
IndivQLearningVar/1151_115_1	centralized	True	-10	False	GridWorld	ISR	FullObsDiscrete	Individual_Q	0.2	0.2	1000000	1
IndivQLearningVar/1152_115_2	centralized	True	-10	False	GridWorld	ISR	FullObsDiscrete	Individual_Q	0.2	0.2	1000000	2
IndivQLearningVar/1153_115_3	centralized	True	-10	False	GridWorld	ISR	FullObsDiscrete	Individual_Q	0.2	0.2	1000000	3
IndivQLearningVar/1154_115_4	centralized	True	-10	False	GridWorld	ISR	FullObsDiscrete	Individual_Q	0.2	0.2	1000000	4
IndivQLearningVar/1155_115_5	centralized	True	-10	False	GridWorld	ISR	FullObsDiscrete	Individual_Q	0.2	0.2	1000000	5
IndivQLearningVar/1156_115_6	centralized	True	-10	False	GridWorld	ISR	FullObsDiscrete	Individual_Q	0.2	0.2	1000000	6
IndivQLearningVar/1157_115_7	centralized	True	-10	False	GridWorld	ISR	FullObsDiscrete	Individual_Q	0.2	0.2	1000000	7
IndivQLearningVar/1158_115_8	centralized	True	-10	False	GridWorld	ISR	FullObsDiscrete	Individual_Q	0.2	0.2	1000000	8
IndivQLearningVar/1159_115_9	centralized	True	-10	False	GridWorld	ISR	FullObsDiscrete	Individual_Q	0.2	0.2	1000000	9
IndivQLearningVar/1160_116_0	centralized	True	-100	False	GridWorld	ISR	FullObsDiscrete	Individual_Q	0.2	0.2	1000000	0
IndivQLearningVar/1161_116_1	centralized	True	-100	False	GridWorld	ISR	FullObsDiscrete	Individual_Q	0.2	0.2	1000000	1
IndivQLearningVar/1162_116_2	centralized	True	-100	False	GridWorld	ISR	FullObsDiscrete	Individual_Q	0.2	0.2	1000000	2
IndivQLearningVar/1163_116_3	centralized	True	-100	False	GridWorld	ISR	FullObsDiscrete	Individual_Q	0.2	0.2	1000000	3
IndivQLearningVar/1164_116_4	centralized	True	-100	False	GridWorld	ISR	FullObsDiscrete	Individual_Q	0.2	0.2	1000000	4
IndivQLearningVar/1165_116_5	centralized	True	-100	False	GridWorld	ISR	FullObsDiscrete	Individual_Q	0.2	0.2	1000000	5
IndivQLearningVar/1166_116_6	centralized	True	-100	False	GridWorld	ISR	FullObsDiscrete	Individual_Q	0.2	0.2	1000000	6
IndivQLearningVar/1167_116_7	centralized	True	-100	False	GridWorld	ISR	FullObsDiscrete	Individual_Q	0.2	0.2	1000000	7
IndivQLearningVar/1168_116_8	centralized	True	-100	False	GridWorld	ISR	FullObsDiscrete	Individual_Q	0.2	0.2	1000000	8
IndivQLearningVar/1169_116_9	centralized	True	-100	False	GridWorld	ISR	FullObsDiscrete	Individual_Q	0.2	0.2	1000000	9
IndivQLearningVar/1170_117_0	centralized	False	0	False	GridWorld	ISR	FullObsDiscrete	Individual_Q	0.2	0.01	1000000	0
IndivQLearningVar/1171_117_1	centralized	False	0	False	GridWorld	ISR	FullObsDiscrete	Individual_Q	0.2	0.01	1000000	1
IndivQLearningVar/1172_117_2	centralized	False	0	False	GridWorld	ISR	FullObsDiscrete	Individual_Q	0.2	0.01	1000000	2
IndivQLearningVar/1173_117_3	centralized	False	0	False	GridWorld	ISR	FullObsDiscrete	Individual_Q	0.2	0.01	1000000	3
IndivQLearningVar/1174_117_4	centralized	False	0	False	GridWorld	ISR	FullObsDiscrete	Individual_Q	0.2	0.01	1000000	4
IndivQLearningVar/1175_117_5	centralized	False	0	False	GridWorld	ISR	FullObsDiscrete	Individual_Q	0.2	0.01	1000000	5
IndivQLearningVar/1176_117_6	centralized	False	0	False	GridWorld	ISR	FullObsDiscrete	Individual_Q	0.2	0.01	1000000	6
IndivQLearningVar/1177_117_7	centralized	False	0	False	GridWorld	ISR	FullObsDiscrete	Individual_Q	0.2	0.01	1000000	7
IndivQLearningVar/1178_117_8	centralized	False	0	False	GridWorld	ISR	FullObsDiscrete	Individual_Q	0.2	0.01	1000000	8
IndivQLearningVar/1179_117_9	centralized	False	0	False	GridWorld	ISR	FullObsDiscrete	Individual_Q	0.2	0.01	1000000	9
IndivQLearningVar/1180_118_0	centralized	True	-10	False	GridWorld	ISR	FullObsDiscrete	Individual_Q	0.2	0.01	1000000	0
IndivQLearningVar/1181_118_1	centralized	True	-10	False	GridWorld	ISR	FullObsDiscrete	Individual_Q	0.2	0.01	1000000	1
IndivQLearningVar/1182_118_2	centralized	True	-10	False	GridWorld	ISR	FullObsDiscrete	Individual_Q	0.2	0.01	1000000	2
IndivQLearningVar/1183_118_3	centralized	True	-10	False	GridWorld	ISR	FullObsDiscrete	Individual_Q	0.2	0.01	1000000	3
IndivQLearningVar/1184_118_4	centralized	True	-10	False	GridWorld	ISR	FullObsDiscrete	Individual_Q	0.2	0.01	1000000	4
IndivQLearningVar/1185_118_5	centralized	True	-10	False	GridWorld	ISR	FullObsDiscrete	Individual_Q	0.2	0.01	1000000	5
IndivQLearningVar/1186_118_6	centralized	True	-10	False	GridWorld	ISR	FullObsDiscrete	Individual_Q	0.2	0.01	1000000	6
IndivQLearningVar/1187_118_7	centralized	True	-10	False	GridWorld	ISR	FullObsDiscrete	Individual_Q	0.2	0.01	1000000	7
IndivQLearningVar/1188_118_8	centralized	True	-10	False	GridWorld	ISR	FullObsDiscrete	Individual_Q	0.2	0.01	1000000	8
IndivQLearningVar/1189_118_9	centralized	True	-10	False	GridWorld	ISR	FullObsDiscrete	Individual_Q	0.2	0.01	1000000	9
IndivQLearningVar/1190_119_0	centralized	True	-100	False	GridWorld	ISR	FullObsDiscrete	Individual_Q	0.2	0.01	1000000	0
IndivQLearningVar/1191_119_1	centralized	True	-100	False	GridWorld	ISR	FullObsDiscrete	Individual_Q	0.2	0.01	1000000	1
IndivQLearningVar/1192_119_2	centralized	True	-100	False	GridWorld	ISR	FullObsDiscrete	Individual_Q	0.2	0.01	1000000	2
IndivQLearningVar/1193_119_3	centralized	True	-100	False	GridWorld	ISR	FullObsDiscrete	Individual_Q	0.2	0.01	1000000	3
IndivQLearningVar/1194_119_4	centralized	True	-100	False	GridWorld	ISR	FullObsDiscrete	Individual_Q	0.2	0.01	1000000	4
IndivQLearningVar/1195_119_5	centralized	True	-100	False	GridWorld	ISR	FullObsDiscrete	Individual_Q	0.2	0.01	1000000	5
IndivQLearningVar/1196_119_6	centralized	True	-100	False	GridWorld	ISR	FullObsDiscrete	Individual_Q	0.2	0.01	1000000	6
IndivQLearningVar/1197_119_7	centralized	True	-100	False	GridWorld	ISR	FullObsDiscrete	Individual_Q	0.2	0.01	1000000	7
IndivQLearningVar/1198_119_8	centralized	True	-100	False	GridWorld	ISR	FullObsDiscrete	Individual_Q	0.2	0.01	1000000	8
IndivQLearningVar/1199_119_9	centralized	True	-100	False	GridWorld	ISR	FullObsDiscrete	Individual_Q	0.2	0.01	1000000	9
IndivQLearningVar/1200_120_0	decentralized	False	0	False	GridWorld	ISR	PartialObsDiscrete	Individual_Q	0.2	0.2	1000000	0
IndivQLearningVar/1201_120_1	decentralized	False	0	False	GridWorld	ISR	PartialObsDiscrete	Individual_Q	0.2	0.2	1000000	1
IndivQLearningVar/1202_120_2	decentralized	False	0	False	GridWorld	ISR	PartialObsDiscrete	Individual_Q	0.2	0.2	1000000	2
IndivQLearningVar/1203_120_3	decentralized	False	0	False	GridWorld	ISR	PartialObsDiscrete	Individual_Q	0.2	0.2	1000000	3
IndivQLearningVar/1204_120_4	decentralized	False	0	False	GridWorld	ISR	PartialObsDiscrete	Individual_Q	0.2	0.2	1000000	4
IndivQLearningVar/1205_120_5	decentralized	False	0	False	GridWorld	ISR	PartialObsDiscrete	Individual_Q	0.2	0.2	1000000	5
IndivQLearningVar/1206_120_6	decentralized	False	0	False	GridWorld	ISR	PartialObsDiscrete	Individual_Q	0.2	0.2	1000000	6
IndivQLearningVar/1207_120_7	decentralized	False	0	False	GridWorld	ISR	PartialObsDiscrete	Individual_Q	0.2	0.2	1000000	7
IndivQLearningVar/1208_120_8	decentralized	False	0	False	GridWorld	ISR	PartialObsDiscrete	Individual_Q	0.2	0.2	1000000	8
IndivQLearningVar/1209_120_9	decentralized	False	0	False	GridWorld	ISR	PartialObsDiscrete	Individual_Q	0.2	0.2	1000000	9
IndivQLearningVar/1210_121_0	decentralized	True	-10	False	GridWorld	ISR	PartialObsDiscrete	Individual_Q	0.2	0.2	1000000	0
IndivQLearningVar/1211_121_1	decentralized	True	-10	False	GridWorld	ISR	PartialObsDiscrete	Individual_Q	0.2	0.2	1000000	1
IndivQLearningVar/1212_121_2	decentralized	True	-10	False	GridWorld	ISR	PartialObsDiscrete	Individual_Q	0.2	0.2	1000000	2
IndivQLearningVar/1213_121_3	decentralized	True	-10	False	GridWorld	ISR	PartialObsDiscrete	Individual_Q	0.2	0.2	1000000	3
IndivQLearningVar/1214_121_4	decentralized	True	-10	False	GridWorld	ISR	PartialObsDiscrete	Individual_Q	0.2	0.2	1000000	4
IndivQLearningVar/1215_121_5	decentralized	True	-10	False	GridWorld	ISR	PartialObsDiscrete	Individual_Q	0.2	0.2	1000000	5
IndivQLearningVar/1216_121_6	decentralized	True	-10	False	GridWorld	ISR	PartialObsDiscrete	Individual_Q	0.2	0.2	1000000	6
IndivQLearningVar/1217_121_7	decentralized	True	-10	False	GridWorld	ISR	PartialObsDiscrete	Individual_Q	0.2	0.2	1000000	7
IndivQLearningVar/1218_121_8	decentralized	True	-10	False	GridWorld	ISR	PartialObsDiscrete	Individual_Q	0.2	0.2	1000000	8
IndivQLearningVar/1219_121_9	decentralized	True	-10	False	GridWorld	ISR	PartialObsDiscrete	Individual_Q	0.2	0.2	1000000	9
IndivQLearningVar/1220_122_0	decentralized	True	-100	False	GridWorld	ISR	PartialObsDiscrete	Individual_Q	0.2	0.2	1000000	0
IndivQLearningVar/1221_122_1	decentralized	True	-100	False	GridWorld	ISR	PartialObsDiscrete	Individual_Q	0.2	0.2	1000000	1
IndivQLearningVar/1222_122_2	decentralized	True	-100	False	GridWorld	ISR	PartialObsDiscrete	Individual_Q	0.2	0.2	1000000	2
IndivQLearningVar/1223_122_3	decentralized	True	-100	False	GridWorld	ISR	PartialObsDiscrete	Individual_Q	0.2	0.2	1000000	3
IndivQLearningVar/1224_122_4	decentralized	True	-100	False	GridWorld	ISR	PartialObsDiscrete	Individual_Q	0.2	0.2	1000000	4
IndivQLearningVar/1225_122_5	decentralized	True	-100	False	GridWorld	ISR	PartialObsDiscrete	Individual_Q	0.2	0.2	1000000	5
IndivQLearningVar/1226_122_6	decentralized	True	-100	False	GridWorld	ISR	PartialObsDiscrete	Individual_Q	0.2	0.2	1000000	6
IndivQLearningVar/1227_122_7	decentralized	True	-100	False	GridWorld	ISR	PartialObsDiscrete	Individual_Q	0.2	0.2	1000000	7
IndivQLearningVar/1228_122_8	decentralized	True	-100	False	GridWorld	ISR	PartialObsDiscrete	Individual_Q	0.2	0.2	1000000	8
IndivQLearningVar/1229_122_9	decentralized	True	-100	False	GridWorld	ISR	PartialObsDiscrete	Individual_Q	0.2	0.2	1000000	9
IndivQLearningVar/1230_123_0	decentralized	False	0	False	GridWorld	ISR	PartialObsDiscrete	Individual_Q	0.2	0.01	1000000	0
IndivQLearningVar/1231_123_1	decentralized	False	0	False	GridWorld	ISR	PartialObsDiscrete	Individual_Q	0.2	0.01	1000000	1
IndivQLearningVar/1232_123_2	decentralized	False	0	False	GridWorld	ISR	PartialObsDiscrete	Individual_Q	0.2	0.01	1000000	2
IndivQLearningVar/1233_123_3	decentralized	False	0	False	GridWorld	ISR	PartialObsDiscrete	Individual_Q	0.2	0.01	1000000	3
IndivQLearningVar/1234_123_4	decentralized	False	0	False	GridWorld	ISR	PartialObsDiscrete	Individual_Q	0.2	0.01	1000000	4
IndivQLearningVar/1235_123_5	decentralized	False	0	False	GridWorld	ISR	PartialObsDiscrete	Individual_Q	0.2	0.01	1000000	5
IndivQLearningVar/1236_123_6	decentralized	False	0	False	GridWorld	ISR	PartialObsDiscrete	Individual_Q	0.2	0.01	1000000	6
IndivQLearningVar/1237_123_7	decentralized	False	0	False	GridWorld	ISR	PartialObsDiscrete	Individual_Q	0.2	0.01	1000000	7
IndivQLearningVar/1238_123_8	decentralized	False	0	False	GridWorld	ISR	PartialObsDiscrete	Individual_Q	0.2	0.01	1000000	8
IndivQLearningVar/1239_123_9	decentralized	False	0	False	GridWorld	ISR	PartialObsDiscrete	Individual_Q	0.2	0.01	1000000	9
IndivQLearningVar/1240_124_0	decentralized	True	-10	False	GridWorld	ISR	PartialObsDiscrete	Individual_Q	0.2	0.01	1000000	0
IndivQLearningVar/1241_124_1	decentralized	True	-10	False	GridWorld	ISR	PartialObsDiscrete	Individual_Q	0.2	0.01	1000000	1
IndivQLearningVar/1242_124_2	decentralized	True	-10	False	GridWorld	ISR	PartialObsDiscrete	Individual_Q	0.2	0.01	1000000	2
IndivQLearningVar/1243_124_3	decentralized	True	-10	False	GridWorld	ISR	PartialObsDiscrete	Individual_Q	0.2	0.01	1000000	3
IndivQLearningVar/1244_124_4	decentralized	True	-10	False	GridWorld	ISR	PartialObsDiscrete	Individual_Q	0.2	0.01	1000000	4
IndivQLearningVar/1245_124_5	decentralized	True	-10	False	GridWorld	ISR	PartialObsDiscrete	Individual_Q	0.2	0.01	1000000	5
IndivQLearningVar/1246_124_6	decentralized	True	-10	False	GridWorld	ISR	PartialObsDiscrete	Individual_Q	0.2	0.01	1000000	6
IndivQLearningVar/1247_124_7	decentralized	True	-10	False	GridWorld	ISR	PartialObsDiscrete	Individual_Q	0.2	0.01	1000000	7
IndivQLearningVar/1248_124_8	decentralized	True	-10	False	GridWorld	ISR	PartialObsDiscrete	Individual_Q	0.2	0.01	1000000	8
IndivQLearningVar/1249_124_9	decentralized	True	-10	False	GridWorld	ISR	PartialObsDiscrete	Individual_Q	0.2	0.01	1000000	9
IndivQLearningVar/1250_125_0	decentralized	True	-100	False	GridWorld	ISR	PartialObsDiscrete	Individual_Q	0.2	0.01	1000000	0
IndivQLearningVar/1251_125_1	decentralized	True	-100	False	GridWorld	ISR	PartialObsDiscrete	Individual_Q	0.2	0.01	1000000	1
IndivQLearningVar/1252_125_2	decentralized	True	-100	False	GridWorld	ISR	PartialObsDiscrete	Individual_Q	0.2	0.01	1000000	2
IndivQLearningVar/1253_125_3	decentralized	True	-100	False	GridWorld	ISR	PartialObsDiscrete	Individual_Q	0.2	0.01	1000000	3
IndivQLearningVar/1254_125_4	decentralized	True	-100	False	GridWorld	ISR	PartialObsDiscrete	Individual_Q	0.2	0.01	1000000	4
IndivQLearningVar/1255_125_5	decentralized	True	-100	False	GridWorld	ISR	PartialObsDiscrete	Individual_Q	0.2	0.01	1000000	5
IndivQLearningVar/1256_125_6	decentralized	True	-100	False	GridWorld	ISR	PartialObsDiscrete	Individual_Q	0.2	0.01	1000000	6
IndivQLearningVar/1257_125_7	decentralized	True	-100	False	GridWorld	ISR	PartialObsDiscrete	Individual_Q	0.2	0.01	1000000	7
IndivQLearningVar/1258_125_8	decentralized	True	-100	False	GridWorld	ISR	PartialObsDiscrete	Individual_Q	0.2	0.01	1000000	8
IndivQLearningVar/1259_125_9	decentralized	True	-100	False	GridWorld	ISR	PartialObsDiscrete	Individual_Q	0.2	0.01	1000000	9
IndivQLearningVar/1260_126_0	decentralized	False	0	False	GridWorld	ISR	FullObsDiscrete	Individual_Q	0.2	0.2	1000000	0
IndivQLearningVar/1261_126_1	decentralized	False	0	False	GridWorld	ISR	FullObsDiscrete	Individual_Q	0.2	0.2	1000000	1
IndivQLearningVar/1262_126_2	decentralized	False	0	False	GridWorld	ISR	FullObsDiscrete	Individual_Q	0.2	0.2	1000000	2
IndivQLearningVar/1263_126_3	decentralized	False	0	False	GridWorld	ISR	FullObsDiscrete	Individual_Q	0.2	0.2	1000000	3
IndivQLearningVar/1264_126_4	decentralized	False	0	False	GridWorld	ISR	FullObsDiscrete	Individual_Q	0.2	0.2	1000000	4
IndivQLearningVar/1265_126_5	decentralized	False	0	False	GridWorld	ISR	FullObsDiscrete	Individual_Q	0.2	0.2	1000000	5
IndivQLearningVar/1266_126_6	decentralized	False	0	False	GridWorld	ISR	FullObsDiscrete	Individual_Q	0.2	0.2	1000000	6
IndivQLearningVar/1267_126_7	decentralized	False	0	False	GridWorld	ISR	FullObsDiscrete	Individual_Q	0.2	0.2	1000000	7
IndivQLearningVar/1268_126_8	decentralized	False	0	False	GridWorld	ISR	FullObsDiscrete	Individual_Q	0.2	0.2	1000000	8
IndivQLearningVar/1269_126_9	decentralized	False	0	False	GridWorld	ISR	FullObsDiscrete	Individual_Q	0.2	0.2	1000000	9
IndivQLearningVar/1270_127_0	decentralized	True	-10	False	GridWorld	ISR	FullObsDiscrete	Individual_Q	0.2	0.2	1000000	0
IndivQLearningVar/1271_127_1	decentralized	True	-10	False	GridWorld	ISR	FullObsDiscrete	Individual_Q	0.2	0.2	1000000	1
IndivQLearningVar/1272_127_2	decentralized	True	-10	False	GridWorld	ISR	FullObsDiscrete	Individual_Q	0.2	0.2	1000000	2
IndivQLearningVar/1273_127_3	decentralized	True	-10	False	GridWorld	ISR	FullObsDiscrete	Individual_Q	0.2	0.2	1000000	3
IndivQLearningVar/1274_127_4	decentralized	True	-10	False	GridWorld	ISR	FullObsDiscrete	Individual_Q	0.2	0.2	1000000	4
IndivQLearningVar/1275_127_5	decentralized	True	-10	False	GridWorld	ISR	FullObsDiscrete	Individual_Q	0.2	0.2	1000000	5
IndivQLearningVar/1276_127_6	decentralized	True	-10	False	GridWorld	ISR	FullObsDiscrete	Individual_Q	0.2	0.2	1000000	6
IndivQLearningVar/1277_127_7	decentralized	True	-10	False	GridWorld	ISR	FullObsDiscrete	Individual_Q	0.2	0.2	1000000	7
IndivQLearningVar/1278_127_8	decentralized	True	-10	False	GridWorld	ISR	FullObsDiscrete	Individual_Q	0.2	0.2	1000000	8
IndivQLearningVar/1279_127_9	decentralized	True	-10	False	GridWorld	ISR	FullObsDiscrete	Individual_Q	0.2	0.2	1000000	9
IndivQLearningVar/1280_128_0	decentralized	True	-100	False	GridWorld	ISR	FullObsDiscrete	Individual_Q	0.2	0.2	1000000	0
IndivQLearningVar/1281_128_1	decentralized	True	-100	False	GridWorld	ISR	FullObsDiscrete	Individual_Q	0.2	0.2	1000000	1
IndivQLearningVar/1282_128_2	decentralized	True	-100	False	GridWorld	ISR	FullObsDiscrete	Individual_Q	0.2	0.2	1000000	2
IndivQLearningVar/1283_128_3	decentralized	True	-100	False	GridWorld	ISR	FullObsDiscrete	Individual_Q	0.2	0.2	1000000	3
IndivQLearningVar/1284_128_4	decentralized	True	-100	False	GridWorld	ISR	FullObsDiscrete	Individual_Q	0.2	0.2	1000000	4
IndivQLearningVar/1285_128_5	decentralized	True	-100	False	GridWorld	ISR	FullObsDiscrete	Individual_Q	0.2	0.2	1000000	5
IndivQLearningVar/1286_128_6	decentralized	True	-100	False	GridWorld	ISR	FullObsDiscrete	Individual_Q	0.2	0.2	1000000	6
IndivQLearningVar/1287_128_7	decentralized	True	-100	False	GridWorld	ISR	FullObsDiscrete	Individual_Q	0.2	0.2	1000000	7
IndivQLearningVar/1288_128_8	decentralized	True	-100	False	GridWorld	ISR	FullObsDiscrete	Individual_Q	0.2	0.2	1000000	8
IndivQLearningVar/1289_128_9	decentralized	True	-100	False	GridWorld	ISR	FullObsDiscrete	Individual_Q	0.2	0.2	1000000	9
IndivQLearningVar/1290_129_0	decentralized	False	0	False	GridWorld	ISR	FullObsDiscrete	Individual_Q	0.2	0.01	1000000	0
IndivQLearningVar/1291_129_1	decentralized	False	0	False	GridWorld	ISR	FullObsDiscrete	Individual_Q	0.2	0.01	1000000	1
IndivQLearningVar/1292_129_2	decentralized	False	0	False	GridWorld	ISR	FullObsDiscrete	Individual_Q	0.2	0.01	1000000	2
IndivQLearningVar/1293_129_3	decentralized	False	0	False	GridWorld	ISR	FullObsDiscrete	Individual_Q	0.2	0.01	1000000	3
IndivQLearningVar/1294_129_4	decentralized	False	0	False	GridWorld	ISR	FullObsDiscrete	Individual_Q	0.2	0.01	1000000	4
IndivQLearningVar/1295_129_5	decentralized	False	0	False	GridWorld	ISR	FullObsDiscrete	Individual_Q	0.2	0.01	1000000	5
IndivQLearningVar/1296_129_6	decentralized	False	0	False	GridWorld	ISR	FullObsDiscrete	Individual_Q	0.2	0.01	1000000	6
IndivQLearningVar/1297_129_7	decentralized	False	0	False	GridWorld	ISR	FullObsDiscrete	Individual_Q	0.2	0.01	1000000	7
IndivQLearningVar/1298_129_8	decentralized	False	0	False	GridWorld	ISR	FullObsDiscrete	Individual_Q	0.2	0.01	1000000	8
IndivQLearningVar/1299_129_9	decentralized	False	0	False	GridWorld	ISR	FullObsDiscrete	Individual_Q	0.2	0.01	1000000	9
IndivQLearningVar/1300_130_0	decentralized	True	-10	False	GridWorld	ISR	FullObsDiscrete	Individual_Q	0.2	0.01	1000000	0
IndivQLearningVar/1301_130_1	decentralized	True	-10	False	GridWorld	ISR	FullObsDiscrete	Individual_Q	0.2	0.01	1000000	1
IndivQLearningVar/1302_130_2	decentralized	True	-10	False	GridWorld	ISR	FullObsDiscrete	Individual_Q	0.2	0.01	1000000	2
IndivQLearningVar/1303_130_3	decentralized	True	-10	False	GridWorld	ISR	FullObsDiscrete	Individual_Q	0.2	0.01	1000000	3
IndivQLearningVar/1304_130_4	decentralized	True	-10	False	GridWorld	ISR	FullObsDiscrete	Individual_Q	0.2	0.01	1000000	4
IndivQLearningVar/1305_130_5	decentralized	True	-10	False	GridWorld	ISR	FullObsDiscrete	Individual_Q	0.2	0.01	1000000	5
IndivQLearningVar/1306_130_6	decentralized	True	-10	False	GridWorld	ISR	FullObsDiscrete	Individual_Q	0.2	0.01	1000000	6
IndivQLearningVar/1307_130_7	decentralized	True	-10	False	GridWorld	ISR	FullObsDiscrete	Individual_Q	0.2	0.01	1000000	7
IndivQLearningVar/1308_130_8	decentralized	True	-10	False	GridWorld	ISR	FullObsDiscrete	Individual_Q	0.2	0.01	1000000	8
IndivQLearningVar/1309_130_9	decentralized	True	-10	False	GridWorld	ISR	FullObsDiscrete	Individual_Q	0.2	0.01	1000000	9
IndivQLearningVar/1310_131_0	decentralized	True	-100	False	GridWorld	ISR	FullObsDiscrete	Individual_Q	0.2	0.01	1000000	0
IndivQLearningVar/1311_131_1	decentralized	True	-100	False	GridWorld	ISR	FullObsDiscrete	Individual_Q	0.2	0.01	1000000	1
IndivQLearningVar/1312_131_2	decentralized	True	-100	False	GridWorld	ISR	FullObsDiscrete	Individual_Q	0.2	0.01	1000000	2
IndivQLearningVar/1313_131_3	decentralized	True	-100	False	GridWorld	ISR	FullObsDiscrete	Individual_Q	0.2	0.01	1000000	3
IndivQLearningVar/1314_131_4	decentralized	True	-100	False	GridWorld	ISR	FullObsDiscrete	Individual_Q	0.2	0.01	1000000	4
IndivQLearningVar/1315_131_5	decentralized	True	-100	False	GridWorld	ISR	FullObsDiscrete	Individual_Q	0.2	0.01	1000000	5
IndivQLearningVar/1316_131_6	decentralized	True	-100	False	GridWorld	ISR	FullObsDiscrete	Individual_Q	0.2	0.01	1000000	6
IndivQLearningVar/1317_131_7	decentralized	True	-100	False	GridWorld	ISR	FullObsDiscrete	Individual_Q	0.2	0.01	1000000	7
IndivQLearningVar/1318_131_8	decentralized	True	-100	False	GridWorld	ISR	FullObsDiscrete	Individual_Q	0.2	0.01	1000000	8
IndivQLearningVar/1319_131_9	decentralized	True	-100	False	GridWorld	ISR	FullObsDiscrete	Individual_Q	0.2	0.01	1000000	9
IndivQLearningVar/1320_132_0	none	False	0	False	GridWorld	ISR	PartialObsDiscrete	Individual_Q	0.2	0.2	1000000	0
IndivQLearningVar/1321_132_1	none	False	0	False	GridWorld	ISR	PartialObsDiscrete	Individual_Q	0.2	0.2	1000000	1
IndivQLearningVar/1322_132_2	none	False	0	False	GridWorld	ISR	PartialObsDiscrete	Individual_Q	0.2	0.2	1000000	2
IndivQLearningVar/1323_132_3	none	False	0	False	GridWorld	ISR	PartialObsDiscrete	Individual_Q	0.2	0.2	1000000	3
IndivQLearningVar/1324_132_4	none	False	0	False	GridWorld	ISR	PartialObsDiscrete	Individual_Q	0.2	0.2	1000000	4
IndivQLearningVar/1325_132_5	none	False	0	False	GridWorld	ISR	PartialObsDiscrete	Individual_Q	0.2	0.2	1000000	5
IndivQLearningVar/1326_132_6	none	False	0	False	GridWorld	ISR	PartialObsDiscrete	Individual_Q	0.2	0.2	1000000	6
IndivQLearningVar/1327_132_7	none	False	0	False	GridWorld	ISR	PartialObsDiscrete	Individual_Q	0.2	0.2	1000000	7
IndivQLearningVar/1328_132_8	none	False	0	False	GridWorld	ISR	PartialObsDiscrete	Individual_Q	0.2	0.2	1000000	8
IndivQLearningVar/1329_132_9	none	False	0	False	GridWorld	ISR	PartialObsDiscrete	Individual_Q	0.2	0.2	1000000	9
IndivQLearningVar/1330_133_0	none	True	-10	False	GridWorld	ISR	PartialObsDiscrete	Individual_Q	0.2	0.2	1000000	0
IndivQLearningVar/1331_133_1	none	True	-10	False	GridWorld	ISR	PartialObsDiscrete	Individual_Q	0.2	0.2	1000000	1
IndivQLearningVar/1332_133_2	none	True	-10	False	GridWorld	ISR	PartialObsDiscrete	Individual_Q	0.2	0.2	1000000	2
IndivQLearningVar/1333_133_3	none	True	-10	False	GridWorld	ISR	PartialObsDiscrete	Individual_Q	0.2	0.2	1000000	3
IndivQLearningVar/1334_133_4	none	True	-10	False	GridWorld	ISR	PartialObsDiscrete	Individual_Q	0.2	0.2	1000000	4
IndivQLearningVar/1335_133_5	none	True	-10	False	GridWorld	ISR	PartialObsDiscrete	Individual_Q	0.2	0.2	1000000	5
IndivQLearningVar/1336_133_6	none	True	-10	False	GridWorld	ISR	PartialObsDiscrete	Individual_Q	0.2	0.2	1000000	6
IndivQLearningVar/1337_133_7	none	True	-10	False	GridWorld	ISR	PartialObsDiscrete	Individual_Q	0.2	0.2	1000000	7
IndivQLearningVar/1338_133_8	none	True	-10	False	GridWorld	ISR	PartialObsDiscrete	Individual_Q	0.2	0.2	1000000	8
IndivQLearningVar/1339_133_9	none	True	-10	False	GridWorld	ISR	PartialObsDiscrete	Individual_Q	0.2	0.2	1000000	9
IndivQLearningVar/1340_134_0	none	True	-100	False	GridWorld	ISR	PartialObsDiscrete	Individual_Q	0.2	0.2	1000000	0
IndivQLearningVar/1341_134_1	none	True	-100	False	GridWorld	ISR	PartialObsDiscrete	Individual_Q	0.2	0.2	1000000	1
IndivQLearningVar/1342_134_2	none	True	-100	False	GridWorld	ISR	PartialObsDiscrete	Individual_Q	0.2	0.2	1000000	2
IndivQLearningVar/1343_134_3	none	True	-100	False	GridWorld	ISR	PartialObsDiscrete	Individual_Q	0.2	0.2	1000000	3
IndivQLearningVar/1344_134_4	none	True	-100	False	GridWorld	ISR	PartialObsDiscrete	Individual_Q	0.2	0.2	1000000	4
IndivQLearningVar/1345_134_5	none	True	-100	False	GridWorld	ISR	PartialObsDiscrete	Individual_Q	0.2	0.2	1000000	5
IndivQLearningVar/1346_134_6	none	True	-100	False	GridWorld	ISR	PartialObsDiscrete	Individual_Q	0.2	0.2	1000000	6
IndivQLearningVar/1347_134_7	none	True	-100	False	GridWorld	ISR	PartialObsDiscrete	Individual_Q	0.2	0.2	1000000	7
IndivQLearningVar/1348_134_8	none	True	-100	False	GridWorld	ISR	PartialObsDiscrete	Individual_Q	0.2	0.2	1000000	8
IndivQLearningVar/1349_134_9	none	True	-100	False	GridWorld	ISR	PartialObsDiscrete	Individual_Q	0.2	0.2	1000000	9
IndivQLearningVar/1350_135_0	none	False	0	False	GridWorld	ISR	PartialObsDiscrete	Individual_Q	0.2	0.01	1000000	0
IndivQLearningVar/1351_135_1	none	False	0	False	GridWorld	ISR	PartialObsDiscrete	Individual_Q	0.2	0.01	1000000	1
IndivQLearningVar/1352_135_2	none	False	0	False	GridWorld	ISR	PartialObsDiscrete	Individual_Q	0.2	0.01	1000000	2
IndivQLearningVar/1353_135_3	none	False	0	False	GridWorld	ISR	PartialObsDiscrete	Individual_Q	0.2	0.01	1000000	3
IndivQLearningVar/1354_135_4	none	False	0	False	GridWorld	ISR	PartialObsDiscrete	Individual_Q	0.2	0.01	1000000	4
IndivQLearningVar/1355_135_5	none	False	0	False	GridWorld	ISR	PartialObsDiscrete	Individual_Q	0.2	0.01	1000000	5
IndivQLearningVar/1356_135_6	none	False	0	False	GridWorld	ISR	PartialObsDiscrete	Individual_Q	0.2	0.01	1000000	6
IndivQLearningVar/1357_135_7	none	False	0	False	GridWorld	ISR	PartialObsDiscrete	Individual_Q	0.2	0.01	1000000	7
IndivQLearningVar/1358_135_8	none	False	0	False	GridWorld	ISR	PartialObsDiscrete	Individual_Q	0.2	0.01	1000000	8
IndivQLearningVar/1359_135_9	none	False	0	False	GridWorld	ISR	PartialObsDiscrete	Individual_Q	0.2	0.01	1000000	9
IndivQLearningVar/1360_136_0	none	True	-10	False	GridWorld	ISR	PartialObsDiscrete	Individual_Q	0.2	0.01	1000000	0
IndivQLearningVar/1361_136_1	none	True	-10	False	GridWorld	ISR	PartialObsDiscrete	Individual_Q	0.2	0.01	1000000	1
IndivQLearningVar/1362_136_2	none	True	-10	False	GridWorld	ISR	PartialObsDiscrete	Individual_Q	0.2	0.01	1000000	2
IndivQLearningVar/1363_136_3	none	True	-10	False	GridWorld	ISR	PartialObsDiscrete	Individual_Q	0.2	0.01	1000000	3
IndivQLearningVar/1364_136_4	none	True	-10	False	GridWorld	ISR	PartialObsDiscrete	Individual_Q	0.2	0.01	1000000	4
IndivQLearningVar/1365_136_5	none	True	-10	False	GridWorld	ISR	PartialObsDiscrete	Individual_Q	0.2	0.01	1000000	5
IndivQLearningVar/1366_136_6	none	True	-10	False	GridWorld	ISR	PartialObsDiscrete	Individual_Q	0.2	0.01	1000000	6
IndivQLearningVar/1367_136_7	none	True	-10	False	GridWorld	ISR	PartialObsDiscrete	Individual_Q	0.2	0.01	1000000	7
IndivQLearningVar/1368_136_8	none	True	-10	False	GridWorld	ISR	PartialObsDiscrete	Individual_Q	0.2	0.01	1000000	8
IndivQLearningVar/1369_136_9	none	True	-10	False	GridWorld	ISR	PartialObsDiscrete	Individual_Q	0.2	0.01	1000000	9
IndivQLearningVar/1370_137_0	none	True	-100	False	GridWorld	ISR	PartialObsDiscrete	Individual_Q	0.2	0.01	1000000	0
IndivQLearningVar/1371_137_1	none	True	-100	False	GridWorld	ISR	PartialObsDiscrete	Individual_Q	0.2	0.01	1000000	1
IndivQLearningVar/1372_137_2	none	True	-100	False	GridWorld	ISR	PartialObsDiscrete	Individual_Q	0.2	0.01	1000000	2
IndivQLearningVar/1373_137_3	none	True	-100	False	GridWorld	ISR	PartialObsDiscrete	Individual_Q	0.2	0.01	1000000	3
IndivQLearningVar/1374_137_4	none	True	-100	False	GridWorld	ISR	PartialObsDiscrete	Individual_Q	0.2	0.01	1000000	4
IndivQLearningVar/1375_137_5	none	True	-100	False	GridWorld	ISR	PartialObsDiscrete	Individual_Q	0.2	0.01	1000000	5
IndivQLearningVar/1376_137_6	none	True	-100	False	GridWorld	ISR	PartialObsDiscrete	Individual_Q	0.2	0.01	1000000	6
IndivQLearningVar/1377_137_7	none	True	-100	False	GridWorld	ISR	PartialObsDiscrete	Individual_Q	0.2	0.01	1000000	7
IndivQLearningVar/1378_137_8	none	True	-100	False	GridWorld	ISR	PartialObsDiscrete	Individual_Q	0.2	0.01	1000000	8
IndivQLearningVar/1379_137_9	none	True	-100	False	GridWorld	ISR	PartialObsDiscrete	Individual_Q	0.2	0.01	1000000	9
IndivQLearningVar/1380_138_0	none	False	0	False	GridWorld	ISR	FullObsDiscrete	Individual_Q	0.2	0.2	1000000	0
IndivQLearningVar/1381_138_1	none	False	0	False	GridWorld	ISR	FullObsDiscrete	Individual_Q	0.2	0.2	1000000	1
IndivQLearningVar/1382_138_2	none	False	0	False	GridWorld	ISR	FullObsDiscrete	Individual_Q	0.2	0.2	1000000	2
IndivQLearningVar/1383_138_3	none	False	0	False	GridWorld	ISR	FullObsDiscrete	Individual_Q	0.2	0.2	1000000	3
IndivQLearningVar/1384_138_4	none	False	0	False	GridWorld	ISR	FullObsDiscrete	Individual_Q	0.2	0.2	1000000	4
IndivQLearningVar/1385_138_5	none	False	0	False	GridWorld	ISR	FullObsDiscrete	Individual_Q	0.2	0.2	1000000	5
IndivQLearningVar/1386_138_6	none	False	0	False	GridWorld	ISR	FullObsDiscrete	Individual_Q	0.2	0.2	1000000	6
IndivQLearningVar/1387_138_7	none	False	0	False	GridWorld	ISR	FullObsDiscrete	Individual_Q	0.2	0.2	1000000	7
IndivQLearningVar/1388_138_8	none	False	0	False	GridWorld	ISR	FullObsDiscrete	Individual_Q	0.2	0.2	1000000	8
IndivQLearningVar/1389_138_9	none	False	0	False	GridWorld	ISR	FullObsDiscrete	Individual_Q	0.2	0.2	1000000	9
IndivQLearningVar/1390_139_0	none	True	-10	False	GridWorld	ISR	FullObsDiscrete	Individual_Q	0.2	0.2	1000000	0
IndivQLearningVar/1391_139_1	none	True	-10	False	GridWorld	ISR	FullObsDiscrete	Individual_Q	0.2	0.2	1000000	1
IndivQLearningVar/1392_139_2	none	True	-10	False	GridWorld	ISR	FullObsDiscrete	Individual_Q	0.2	0.2	1000000	2
IndivQLearningVar/1393_139_3	none	True	-10	False	GridWorld	ISR	FullObsDiscrete	Individual_Q	0.2	0.2	1000000	3
IndivQLearningVar/1394_139_4	none	True	-10	False	GridWorld	ISR	FullObsDiscrete	Individual_Q	0.2	0.2	1000000	4
IndivQLearningVar/1395_139_5	none	True	-10	False	GridWorld	ISR	FullObsDiscrete	Individual_Q	0.2	0.2	1000000	5
IndivQLearningVar/1396_139_6	none	True	-10	False	GridWorld	ISR	FullObsDiscrete	Individual_Q	0.2	0.2	1000000	6
IndivQLearningVar/1397_139_7	none	True	-10	False	GridWorld	ISR	FullObsDiscrete	Individual_Q	0.2	0.2	1000000	7
IndivQLearningVar/1398_139_8	none	True	-10	False	GridWorld	ISR	FullObsDiscrete	Individual_Q	0.2	0.2	1000000	8
IndivQLearningVar/1399_139_9	none	True	-10	False	GridWorld	ISR	FullObsDiscrete	Individual_Q	0.2	0.2	1000000	9
IndivQLearningVar/1400_140_0	none	True	-100	False	GridWorld	ISR	FullObsDiscrete	Individual_Q	0.2	0.2	1000000	0
IndivQLearningVar/1401_140_1	none	True	-100	False	GridWorld	ISR	FullObsDiscrete	Individual_Q	0.2	0.2	1000000	1
IndivQLearningVar/1402_140_2	none	True	-100	False	GridWorld	ISR	FullObsDiscrete	Individual_Q	0.2	0.2	1000000	2
IndivQLearningVar/1403_140_3	none	True	-100	False	GridWorld	ISR	FullObsDiscrete	Individual_Q	0.2	0.2	1000000	3
IndivQLearningVar/1404_140_4	none	True	-100	False	GridWorld	ISR	FullObsDiscrete	Individual_Q	0.2	0.2	1000000	4
IndivQLearningVar/1405_140_5	none	True	-100	False	GridWorld	ISR	FullObsDiscrete	Individual_Q	0.2	0.2	1000000	5
IndivQLearningVar/1406_140_6	none	True	-100	False	GridWorld	ISR	FullObsDiscrete	Individual_Q	0.2	0.2	1000000	6
IndivQLearningVar/1407_140_7	none	True	-100	False	GridWorld	ISR	FullObsDiscrete	Individual_Q	0.2	0.2	1000000	7
IndivQLearningVar/1408_140_8	none	True	-100	False	GridWorld	ISR	FullObsDiscrete	Individual_Q	0.2	0.2	1000000	8
IndivQLearningVar/1409_140_9	none	True	-100	False	GridWorld	ISR	FullObsDiscrete	Individual_Q	0.2	0.2	1000000	9
IndivQLearningVar/1410_141_0	none	False	0	False	GridWorld	ISR	FullObsDiscrete	Individual_Q	0.2	0.01	1000000	0
IndivQLearningVar/1411_141_1	none	False	0	False	GridWorld	ISR	FullObsDiscrete	Individual_Q	0.2	0.01	1000000	1
IndivQLearningVar/1412_141_2	none	False	0	False	GridWorld	ISR	FullObsDiscrete	Individual_Q	0.2	0.01	1000000	2
IndivQLearningVar/1413_141_3	none	False	0	False	GridWorld	ISR	FullObsDiscrete	Individual_Q	0.2	0.01	1000000	3
IndivQLearningVar/1414_141_4	none	False	0	False	GridWorld	ISR	FullObsDiscrete	Individual_Q	0.2	0.01	1000000	4
IndivQLearningVar/1415_141_5	none	False	0	False	GridWorld	ISR	FullObsDiscrete	Individual_Q	0.2	0.01	1000000	5
IndivQLearningVar/1416_141_6	none	False	0	False	GridWorld	ISR	FullObsDiscrete	Individual_Q	0.2	0.01	1000000	6
IndivQLearningVar/1417_141_7	none	False	0	False	GridWorld	ISR	FullObsDiscrete	Individual_Q	0.2	0.01	1000000	7
IndivQLearningVar/1418_141_8	none	False	0	False	GridWorld	ISR	FullObsDiscrete	Individual_Q	0.2	0.01	1000000	8
IndivQLearningVar/1419_141_9	none	False	0	False	GridWorld	ISR	FullObsDiscrete	Individual_Q	0.2	0.01	1000000	9
IndivQLearningVar/1420_142_0	none	True	-10	False	GridWorld	ISR	FullObsDiscrete	Individual_Q	0.2	0.01	1000000	0
IndivQLearningVar/1421_142_1	none	True	-10	False	GridWorld	ISR	FullObsDiscrete	Individual_Q	0.2	0.01	1000000	1
IndivQLearningVar/1422_142_2	none	True	-10	False	GridWorld	ISR	FullObsDiscrete	Individual_Q	0.2	0.01	1000000	2
IndivQLearningVar/1423_142_3	none	True	-10	False	GridWorld	ISR	FullObsDiscrete	Individual_Q	0.2	0.01	1000000	3
IndivQLearningVar/1424_142_4	none	True	-10	False	GridWorld	ISR	FullObsDiscrete	Individual_Q	0.2	0.01	1000000	4
IndivQLearningVar/1425_142_5	none	True	-10	False	GridWorld	ISR	FullObsDiscrete	Individual_Q	0.2	0.01	1000000	5
IndivQLearningVar/1426_142_6	none	True	-10	False	GridWorld	ISR	FullObsDiscrete	Individual_Q	0.2	0.01	1000000	6
IndivQLearningVar/1427_142_7	none	True	-10	False	GridWorld	ISR	FullObsDiscrete	Individual_Q	0.2	0.01	1000000	7
IndivQLearningVar/1428_142_8	none	True	-10	False	GridWorld	ISR	FullObsDiscrete	Individual_Q	0.2	0.01	1000000	8
IndivQLearningVar/1429_142_9	none	True	-10	False	GridWorld	ISR	FullObsDiscrete	Individual_Q	0.2	0.01	1000000	9
IndivQLearningVar/1430_143_0	none	True	-100	False	GridWorld	ISR	FullObsDiscrete	Individual_Q	0.2	0.01	1000000	0
IndivQLearningVar/1431_143_1	none	True	-100	False	GridWorld	ISR	FullObsDiscrete	Individual_Q	0.2	0.01	1000000	1
IndivQLearningVar/1432_143_2	none	True	-100	False	GridWorld	ISR	FullObsDiscrete	Individual_Q	0.2	0.01	1000000	2
IndivQLearningVar/1433_143_3	none	True	-100	False	GridWorld	ISR	FullObsDiscrete	Individual_Q	0.2	0.01	1000000	3
IndivQLearningVar/1434_143_4	none	True	-100	False	GridWorld	ISR	FullObsDiscrete	Individual_Q	0.2	0.01	1000000	4
IndivQLearningVar/1435_143_5	none	True	-100	False	GridWorld	ISR	FullObsDiscrete	Individual_Q	0.2	0.01	1000000	5
IndivQLearningVar/1436_143_6	none	True	-100	False	GridWorld	ISR	FullObsDiscrete	Individual_Q	0.2	0.01	1000000	6
IndivQLearningVar/1437_143_7	none	True	-100	False	GridWorld	ISR	FullObsDiscrete	Individual_Q	0.2	0.01	1000000	7
IndivQLearningVar/1438_143_8	none	True	-100	False	GridWorld	ISR	FullObsDiscrete	Individual_Q	0.2	0.01	1000000	8
IndivQLearningVar/1439_143_9	none	True	-100	False	GridWorld	ISR	FullObsDiscrete	Individual_Q	0.2	0.01	1000000	9
IndivQLearningVar/1440_144_0	centralized	False	0	True	GridWorld	SUNY	PartialObsDiscrete	Individual_Q	0.2	0.2	1000000	0
IndivQLearningVar/1441_144_1	centralized	False	0	True	GridWorld	SUNY	PartialObsDiscrete	Individual_Q	0.2	0.2	1000000	1
IndivQLearningVar/1442_144_2	centralized	False	0	True	GridWorld	SUNY	PartialObsDiscrete	Individual_Q	0.2	0.2	1000000	2
IndivQLearningVar/1443_144_3	centralized	False	0	True	GridWorld	SUNY	PartialObsDiscrete	Individual_Q	0.2	0.2	1000000	3
IndivQLearningVar/1444_144_4	centralized	False	0	True	GridWorld	SUNY	PartialObsDiscrete	Individual_Q	0.2	0.2	1000000	4
IndivQLearningVar/1445_144_5	centralized	False	0	True	GridWorld	SUNY	PartialObsDiscrete	Individual_Q	0.2	0.2	1000000	5
IndivQLearningVar/1446_144_6	centralized	False	0	True	GridWorld	SUNY	PartialObsDiscrete	Individual_Q	0.2	0.2	1000000	6
IndivQLearningVar/1447_144_7	centralized	False	0	True	GridWorld	SUNY	PartialObsDiscrete	Individual_Q	0.2	0.2	1000000	7
IndivQLearningVar/1448_144_8	centralized	False	0	True	GridWorld	SUNY	PartialObsDiscrete	Individual_Q	0.2	0.2	1000000	8
IndivQLearningVar/1449_144_9	centralized	False	0	True	GridWorld	SUNY	PartialObsDiscrete	Individual_Q	0.2	0.2	1000000	9
IndivQLearningVar/1450_145_0	centralized	True	-10	True	GridWorld	SUNY	PartialObsDiscrete	Individual_Q	0.2	0.2	1000000	0
IndivQLearningVar/1451_145_1	centralized	True	-10	True	GridWorld	SUNY	PartialObsDiscrete	Individual_Q	0.2	0.2	1000000	1
IndivQLearningVar/1452_145_2	centralized	True	-10	True	GridWorld	SUNY	PartialObsDiscrete	Individual_Q	0.2	0.2	1000000	2
IndivQLearningVar/1453_145_3	centralized	True	-10	True	GridWorld	SUNY	PartialObsDiscrete	Individual_Q	0.2	0.2	1000000	3
IndivQLearningVar/1454_145_4	centralized	True	-10	True	GridWorld	SUNY	PartialObsDiscrete	Individual_Q	0.2	0.2	1000000	4
IndivQLearningVar/1455_145_5	centralized	True	-10	True	GridWorld	SUNY	PartialObsDiscrete	Individual_Q	0.2	0.2	1000000	5
IndivQLearningVar/1456_145_6	centralized	True	-10	True	GridWorld	SUNY	PartialObsDiscrete	Individual_Q	0.2	0.2	1000000	6
IndivQLearningVar/1457_145_7	centralized	True	-10	True	GridWorld	SUNY	PartialObsDiscrete	Individual_Q	0.2	0.2	1000000	7
IndivQLearningVar/1458_145_8	centralized	True	-10	True	GridWorld	SUNY	PartialObsDiscrete	Individual_Q	0.2	0.2	1000000	8
IndivQLearningVar/1459_145_9	centralized	True	-10	True	GridWorld	SUNY	PartialObsDiscrete	Individual_Q	0.2	0.2	1000000	9
IndivQLearningVar/1460_146_0	centralized	True	-100	True	GridWorld	SUNY	PartialObsDiscrete	Individual_Q	0.2	0.2	1000000	0
IndivQLearningVar/1461_146_1	centralized	True	-100	True	GridWorld	SUNY	PartialObsDiscrete	Individual_Q	0.2	0.2	1000000	1
IndivQLearningVar/1462_146_2	centralized	True	-100	True	GridWorld	SUNY	PartialObsDiscrete	Individual_Q	0.2	0.2	1000000	2
IndivQLearningVar/1463_146_3	centralized	True	-100	True	GridWorld	SUNY	PartialObsDiscrete	Individual_Q	0.2	0.2	1000000	3
IndivQLearningVar/1464_146_4	centralized	True	-100	True	GridWorld	SUNY	PartialObsDiscrete	Individual_Q	0.2	0.2	1000000	4
IndivQLearningVar/1465_146_5	centralized	True	-100	True	GridWorld	SUNY	PartialObsDiscrete	Individual_Q	0.2	0.2	1000000	5
IndivQLearningVar/1466_146_6	centralized	True	-100	True	GridWorld	SUNY	PartialObsDiscrete	Individual_Q	0.2	0.2	1000000	6
IndivQLearningVar/1467_146_7	centralized	True	-100	True	GridWorld	SUNY	PartialObsDiscrete	Individual_Q	0.2	0.2	1000000	7
IndivQLearningVar/1468_146_8	centralized	True	-100	True	GridWorld	SUNY	PartialObsDiscrete	Individual_Q	0.2	0.2	1000000	8
IndivQLearningVar/1469_146_9	centralized	True	-100	True	GridWorld	SUNY	PartialObsDiscrete	Individual_Q	0.2	0.2	1000000	9
IndivQLearningVar/1470_147_0	centralized	False	0	True	GridWorld	SUNY	PartialObsDiscrete	Individual_Q	0.2	0.01	1000000	0
IndivQLearningVar/1471_147_1	centralized	False	0	True	GridWorld	SUNY	PartialObsDiscrete	Individual_Q	0.2	0.01	1000000	1
IndivQLearningVar/1472_147_2	centralized	False	0	True	GridWorld	SUNY	PartialObsDiscrete	Individual_Q	0.2	0.01	1000000	2
IndivQLearningVar/1473_147_3	centralized	False	0	True	GridWorld	SUNY	PartialObsDiscrete	Individual_Q	0.2	0.01	1000000	3
IndivQLearningVar/1474_147_4	centralized	False	0	True	GridWorld	SUNY	PartialObsDiscrete	Individual_Q	0.2	0.01	1000000	4
IndivQLearningVar/1475_147_5	centralized	False	0	True	GridWorld	SUNY	PartialObsDiscrete	Individual_Q	0.2	0.01	1000000	5
IndivQLearningVar/1476_147_6	centralized	False	0	True	GridWorld	SUNY	PartialObsDiscrete	Individual_Q	0.2	0.01	1000000	6
IndivQLearningVar/1477_147_7	centralized	False	0	True	GridWorld	SUNY	PartialObsDiscrete	Individual_Q	0.2	0.01	1000000	7
IndivQLearningVar/1478_147_8	centralized	False	0	True	GridWorld	SUNY	PartialObsDiscrete	Individual_Q	0.2	0.01	1000000	8
IndivQLearningVar/1479_147_9	centralized	False	0	True	GridWorld	SUNY	PartialObsDiscrete	Individual_Q	0.2	0.01	1000000	9
IndivQLearningVar/1480_148_0	centralized	True	-10	True	GridWorld	SUNY	PartialObsDiscrete	Individual_Q	0.2	0.01	1000000	0
IndivQLearningVar/1481_148_1	centralized	True	-10	True	GridWorld	SUNY	PartialObsDiscrete	Individual_Q	0.2	0.01	1000000	1
IndivQLearningVar/1482_148_2	centralized	True	-10	True	GridWorld	SUNY	PartialObsDiscrete	Individual_Q	0.2	0.01	1000000	2
IndivQLearningVar/1483_148_3	centralized	True	-10	True	GridWorld	SUNY	PartialObsDiscrete	Individual_Q	0.2	0.01	1000000	3
IndivQLearningVar/1484_148_4	centralized	True	-10	True	GridWorld	SUNY	PartialObsDiscrete	Individual_Q	0.2	0.01	1000000	4
IndivQLearningVar/1485_148_5	centralized	True	-10	True	GridWorld	SUNY	PartialObsDiscrete	Individual_Q	0.2	0.01	1000000	5
IndivQLearningVar/1486_148_6	centralized	True	-10	True	GridWorld	SUNY	PartialObsDiscrete	Individual_Q	0.2	0.01	1000000	6
IndivQLearningVar/1487_148_7	centralized	True	-10	True	GridWorld	SUNY	PartialObsDiscrete	Individual_Q	0.2	0.01	1000000	7
IndivQLearningVar/1488_148_8	centralized	True	-10	True	GridWorld	SUNY	PartialObsDiscrete	Individual_Q	0.2	0.01	1000000	8
IndivQLearningVar/1489_148_9	centralized	True	-10	True	GridWorld	SUNY	PartialObsDiscrete	Individual_Q	0.2	0.01	1000000	9
IndivQLearningVar/1490_149_0	centralized	True	-100	True	GridWorld	SUNY	PartialObsDiscrete	Individual_Q	0.2	0.01	1000000	0
IndivQLearningVar/1491_149_1	centralized	True	-100	True	GridWorld	SUNY	PartialObsDiscrete	Individual_Q	0.2	0.01	1000000	1
IndivQLearningVar/1492_149_2	centralized	True	-100	True	GridWorld	SUNY	PartialObsDiscrete	Individual_Q	0.2	0.01	1000000	2
IndivQLearningVar/1493_149_3	centralized	True	-100	True	GridWorld	SUNY	PartialObsDiscrete	Individual_Q	0.2	0.01	1000000	3
IndivQLearningVar/1494_149_4	centralized	True	-100	True	GridWorld	SUNY	PartialObsDiscrete	Individual_Q	0.2	0.01	1000000	4
IndivQLearningVar/1495_149_5	centralized	True	-100	True	GridWorld	SUNY	PartialObsDiscrete	Individual_Q	0.2	0.01	1000000	5
IndivQLearningVar/1496_149_6	centralized	True	-100	True	GridWorld	SUNY	PartialObsDiscrete	Individual_Q	0.2	0.01	1000000	6
IndivQLearningVar/1497_149_7	centralized	True	-100	True	GridWorld	SUNY	PartialObsDiscrete	Individual_Q	0.2	0.01	1000000	7
IndivQLearningVar/1498_149_8	centralized	True	-100	True	GridWorld	SUNY	PartialObsDiscrete	Individual_Q	0.2	0.01	1000000	8
IndivQLearningVar/1499_149_9	centralized	True	-100	True	GridWorld	SUNY	PartialObsDiscrete	Individual_Q	0.2	0.01	1000000	9
IndivQLearningVar/1500_150_0	centralized	False	0	True	GridWorld	SUNY	FullObsDiscrete	Individual_Q	0.2	0.2	1000000	0
IndivQLearningVar/1501_150_1	centralized	False	0	True	GridWorld	SUNY	FullObsDiscrete	Individual_Q	0.2	0.2	1000000	1
IndivQLearningVar/1502_150_2	centralized	False	0	True	GridWorld	SUNY	FullObsDiscrete	Individual_Q	0.2	0.2	1000000	2
IndivQLearningVar/1503_150_3	centralized	False	0	True	GridWorld	SUNY	FullObsDiscrete	Individual_Q	0.2	0.2	1000000	3
IndivQLearningVar/1504_150_4	centralized	False	0	True	GridWorld	SUNY	FullObsDiscrete	Individual_Q	0.2	0.2	1000000	4
IndivQLearningVar/1505_150_5	centralized	False	0	True	GridWorld	SUNY	FullObsDiscrete	Individual_Q	0.2	0.2	1000000	5
IndivQLearningVar/1506_150_6	centralized	False	0	True	GridWorld	SUNY	FullObsDiscrete	Individual_Q	0.2	0.2	1000000	6
IndivQLearningVar/1507_150_7	centralized	False	0	True	GridWorld	SUNY	FullObsDiscrete	Individual_Q	0.2	0.2	1000000	7
IndivQLearningVar/1508_150_8	centralized	False	0	True	GridWorld	SUNY	FullObsDiscrete	Individual_Q	0.2	0.2	1000000	8
IndivQLearningVar/1509_150_9	centralized	False	0	True	GridWorld	SUNY	FullObsDiscrete	Individual_Q	0.2	0.2	1000000	9
IndivQLearningVar/1510_151_0	centralized	True	-10	True	GridWorld	SUNY	FullObsDiscrete	Individual_Q	0.2	0.2	1000000	0
IndivQLearningVar/1511_151_1	centralized	True	-10	True	GridWorld	SUNY	FullObsDiscrete	Individual_Q	0.2	0.2	1000000	1
IndivQLearningVar/1512_151_2	centralized	True	-10	True	GridWorld	SUNY	FullObsDiscrete	Individual_Q	0.2	0.2	1000000	2
IndivQLearningVar/1513_151_3	centralized	True	-10	True	GridWorld	SUNY	FullObsDiscrete	Individual_Q	0.2	0.2	1000000	3
IndivQLearningVar/1514_151_4	centralized	True	-10	True	GridWorld	SUNY	FullObsDiscrete	Individual_Q	0.2	0.2	1000000	4
IndivQLearningVar/1515_151_5	centralized	True	-10	True	GridWorld	SUNY	FullObsDiscrete	Individual_Q	0.2	0.2	1000000	5
IndivQLearningVar/1516_151_6	centralized	True	-10	True	GridWorld	SUNY	FullObsDiscrete	Individual_Q	0.2	0.2	1000000	6
IndivQLearningVar/1517_151_7	centralized	True	-10	True	GridWorld	SUNY	FullObsDiscrete	Individual_Q	0.2	0.2	1000000	7
IndivQLearningVar/1518_151_8	centralized	True	-10	True	GridWorld	SUNY	FullObsDiscrete	Individual_Q	0.2	0.2	1000000	8
IndivQLearningVar/1519_151_9	centralized	True	-10	True	GridWorld	SUNY	FullObsDiscrete	Individual_Q	0.2	0.2	1000000	9
IndivQLearningVar/1520_152_0	centralized	True	-100	True	GridWorld	SUNY	FullObsDiscrete	Individual_Q	0.2	0.2	1000000	0
IndivQLearningVar/1521_152_1	centralized	True	-100	True	GridWorld	SUNY	FullObsDiscrete	Individual_Q	0.2	0.2	1000000	1
IndivQLearningVar/1522_152_2	centralized	True	-100	True	GridWorld	SUNY	FullObsDiscrete	Individual_Q	0.2	0.2	1000000	2
IndivQLearningVar/1523_152_3	centralized	True	-100	True	GridWorld	SUNY	FullObsDiscrete	Individual_Q	0.2	0.2	1000000	3
IndivQLearningVar/1524_152_4	centralized	True	-100	True	GridWorld	SUNY	FullObsDiscrete	Individual_Q	0.2	0.2	1000000	4
IndivQLearningVar/1525_152_5	centralized	True	-100	True	GridWorld	SUNY	FullObsDiscrete	Individual_Q	0.2	0.2	1000000	5
IndivQLearningVar/1526_152_6	centralized	True	-100	True	GridWorld	SUNY	FullObsDiscrete	Individual_Q	0.2	0.2	1000000	6
IndivQLearningVar/1527_152_7	centralized	True	-100	True	GridWorld	SUNY	FullObsDiscrete	Individual_Q	0.2	0.2	1000000	7
IndivQLearningVar/1528_152_8	centralized	True	-100	True	GridWorld	SUNY	FullObsDiscrete	Individual_Q	0.2	0.2	1000000	8
IndivQLearningVar/1529_152_9	centralized	True	-100	True	GridWorld	SUNY	FullObsDiscrete	Individual_Q	0.2	0.2	1000000	9
IndivQLearningVar/1530_153_0	centralized	False	0	True	GridWorld	SUNY	FullObsDiscrete	Individual_Q	0.2	0.01	1000000	0
IndivQLearningVar/1531_153_1	centralized	False	0	True	GridWorld	SUNY	FullObsDiscrete	Individual_Q	0.2	0.01	1000000	1
IndivQLearningVar/1532_153_2	centralized	False	0	True	GridWorld	SUNY	FullObsDiscrete	Individual_Q	0.2	0.01	1000000	2
IndivQLearningVar/1533_153_3	centralized	False	0	True	GridWorld	SUNY	FullObsDiscrete	Individual_Q	0.2	0.01	1000000	3
IndivQLearningVar/1534_153_4	centralized	False	0	True	GridWorld	SUNY	FullObsDiscrete	Individual_Q	0.2	0.01	1000000	4
IndivQLearningVar/1535_153_5	centralized	False	0	True	GridWorld	SUNY	FullObsDiscrete	Individual_Q	0.2	0.01	1000000	5
IndivQLearningVar/1536_153_6	centralized	False	0	True	GridWorld	SUNY	FullObsDiscrete	Individual_Q	0.2	0.01	1000000	6
IndivQLearningVar/1537_153_7	centralized	False	0	True	GridWorld	SUNY	FullObsDiscrete	Individual_Q	0.2	0.01	1000000	7
IndivQLearningVar/1538_153_8	centralized	False	0	True	GridWorld	SUNY	FullObsDiscrete	Individual_Q	0.2	0.01	1000000	8
IndivQLearningVar/1539_153_9	centralized	False	0	True	GridWorld	SUNY	FullObsDiscrete	Individual_Q	0.2	0.01	1000000	9
IndivQLearningVar/1540_154_0	centralized	True	-10	True	GridWorld	SUNY	FullObsDiscrete	Individual_Q	0.2	0.01	1000000	0
IndivQLearningVar/1541_154_1	centralized	True	-10	True	GridWorld	SUNY	FullObsDiscrete	Individual_Q	0.2	0.01	1000000	1
IndivQLearningVar/1542_154_2	centralized	True	-10	True	GridWorld	SUNY	FullObsDiscrete	Individual_Q	0.2	0.01	1000000	2
IndivQLearningVar/1543_154_3	centralized	True	-10	True	GridWorld	SUNY	FullObsDiscrete	Individual_Q	0.2	0.01	1000000	3
IndivQLearningVar/1544_154_4	centralized	True	-10	True	GridWorld	SUNY	FullObsDiscrete	Individual_Q	0.2	0.01	1000000	4
IndivQLearningVar/1545_154_5	centralized	True	-10	True	GridWorld	SUNY	FullObsDiscrete	Individual_Q	0.2	0.01	1000000	5
IndivQLearningVar/1546_154_6	centralized	True	-10	True	GridWorld	SUNY	FullObsDiscrete	Individual_Q	0.2	0.01	1000000	6
IndivQLearningVar/1547_154_7	centralized	True	-10	True	GridWorld	SUNY	FullObsDiscrete	Individual_Q	0.2	0.01	1000000	7
IndivQLearningVar/1548_154_8	centralized	True	-10	True	GridWorld	SUNY	FullObsDiscrete	Individual_Q	0.2	0.01	1000000	8
IndivQLearningVar/1549_154_9	centralized	True	-10	True	GridWorld	SUNY	FullObsDiscrete	Individual_Q	0.2	0.01	1000000	9
IndivQLearningVar/1550_155_0	centralized	True	-100	True	GridWorld	SUNY	FullObsDiscrete	Individual_Q	0.2	0.01	1000000	0
IndivQLearningVar/1551_155_1	centralized	True	-100	True	GridWorld	SUNY	FullObsDiscrete	Individual_Q	0.2	0.01	1000000	1
IndivQLearningVar/1552_155_2	centralized	True	-100	True	GridWorld	SUNY	FullObsDiscrete	Individual_Q	0.2	0.01	1000000	2
IndivQLearningVar/1553_155_3	centralized	True	-100	True	GridWorld	SUNY	FullObsDiscrete	Individual_Q	0.2	0.01	1000000	3
IndivQLearningVar/1554_155_4	centralized	True	-100	True	GridWorld	SUNY	FullObsDiscrete	Individual_Q	0.2	0.01	1000000	4
IndivQLearningVar/1555_155_5	centralized	True	-100	True	GridWorld	SUNY	FullObsDiscrete	Individual_Q	0.2	0.01	1000000	5
IndivQLearningVar/1556_155_6	centralized	True	-100	True	GridWorld	SUNY	FullObsDiscrete	Individual_Q	0.2	0.01	1000000	6
IndivQLearningVar/1557_155_7	centralized	True	-100	True	GridWorld	SUNY	FullObsDiscrete	Individual_Q	0.2	0.01	1000000	7
IndivQLearningVar/1558_155_8	centralized	True	-100	True	GridWorld	SUNY	FullObsDiscrete	Individual_Q	0.2	0.01	1000000	8
IndivQLearningVar/1559_155_9	centralized	True	-100	True	GridWorld	SUNY	FullObsDiscrete	Individual_Q	0.2	0.01	1000000	9
IndivQLearningVar/1560_156_0	decentralized	False	0	True	GridWorld	SUNY	PartialObsDiscrete	Individual_Q	0.2	0.2	1000000	0
IndivQLearningVar/1561_156_1	decentralized	False	0	True	GridWorld	SUNY	PartialObsDiscrete	Individual_Q	0.2	0.2	1000000	1
IndivQLearningVar/1562_156_2	decentralized	False	0	True	GridWorld	SUNY	PartialObsDiscrete	Individual_Q	0.2	0.2	1000000	2
IndivQLearningVar/1563_156_3	decentralized	False	0	True	GridWorld	SUNY	PartialObsDiscrete	Individual_Q	0.2	0.2	1000000	3
IndivQLearningVar/1564_156_4	decentralized	False	0	True	GridWorld	SUNY	PartialObsDiscrete	Individual_Q	0.2	0.2	1000000	4
IndivQLearningVar/1565_156_5	decentralized	False	0	True	GridWorld	SUNY	PartialObsDiscrete	Individual_Q	0.2	0.2	1000000	5
IndivQLearningVar/1566_156_6	decentralized	False	0	True	GridWorld	SUNY	PartialObsDiscrete	Individual_Q	0.2	0.2	1000000	6
IndivQLearningVar/1567_156_7	decentralized	False	0	True	GridWorld	SUNY	PartialObsDiscrete	Individual_Q	0.2	0.2	1000000	7
IndivQLearningVar/1568_156_8	decentralized	False	0	True	GridWorld	SUNY	PartialObsDiscrete	Individual_Q	0.2	0.2	1000000	8
IndivQLearningVar/1569_156_9	decentralized	False	0	True	GridWorld	SUNY	PartialObsDiscrete	Individual_Q	0.2	0.2	1000000	9
IndivQLearningVar/1570_157_0	decentralized	True	-10	True	GridWorld	SUNY	PartialObsDiscrete	Individual_Q	0.2	0.2	1000000	0
IndivQLearningVar/1571_157_1	decentralized	True	-10	True	GridWorld	SUNY	PartialObsDiscrete	Individual_Q	0.2	0.2	1000000	1
IndivQLearningVar/1572_157_2	decentralized	True	-10	True	GridWorld	SUNY	PartialObsDiscrete	Individual_Q	0.2	0.2	1000000	2
IndivQLearningVar/1573_157_3	decentralized	True	-10	True	GridWorld	SUNY	PartialObsDiscrete	Individual_Q	0.2	0.2	1000000	3
IndivQLearningVar/1574_157_4	decentralized	True	-10	True	GridWorld	SUNY	PartialObsDiscrete	Individual_Q	0.2	0.2	1000000	4
IndivQLearningVar/1575_157_5	decentralized	True	-10	True	GridWorld	SUNY	PartialObsDiscrete	Individual_Q	0.2	0.2	1000000	5
IndivQLearningVar/1576_157_6	decentralized	True	-10	True	GridWorld	SUNY	PartialObsDiscrete	Individual_Q	0.2	0.2	1000000	6
IndivQLearningVar/1577_157_7	decentralized	True	-10	True	GridWorld	SUNY	PartialObsDiscrete	Individual_Q	0.2	0.2	1000000	7
IndivQLearningVar/1578_157_8	decentralized	True	-10	True	GridWorld	SUNY	PartialObsDiscrete	Individual_Q	0.2	0.2	1000000	8
IndivQLearningVar/1579_157_9	decentralized	True	-10	True	GridWorld	SUNY	PartialObsDiscrete	Individual_Q	0.2	0.2	1000000	9
IndivQLearningVar/1580_158_0	decentralized	True	-100	True	GridWorld	SUNY	PartialObsDiscrete	Individual_Q	0.2	0.2	1000000	0
IndivQLearningVar/1581_158_1	decentralized	True	-100	True	GridWorld	SUNY	PartialObsDiscrete	Individual_Q	0.2	0.2	1000000	1
IndivQLearningVar/1582_158_2	decentralized	True	-100	True	GridWorld	SUNY	PartialObsDiscrete	Individual_Q	0.2	0.2	1000000	2
IndivQLearningVar/1583_158_3	decentralized	True	-100	True	GridWorld	SUNY	PartialObsDiscrete	Individual_Q	0.2	0.2	1000000	3
IndivQLearningVar/1584_158_4	decentralized	True	-100	True	GridWorld	SUNY	PartialObsDiscrete	Individual_Q	0.2	0.2	1000000	4
IndivQLearningVar/1585_158_5	decentralized	True	-100	True	GridWorld	SUNY	PartialObsDiscrete	Individual_Q	0.2	0.2	1000000	5
IndivQLearningVar/1586_158_6	decentralized	True	-100	True	GridWorld	SUNY	PartialObsDiscrete	Individual_Q	0.2	0.2	1000000	6
IndivQLearningVar/1587_158_7	decentralized	True	-100	True	GridWorld	SUNY	PartialObsDiscrete	Individual_Q	0.2	0.2	1000000	7
IndivQLearningVar/1588_158_8	decentralized	True	-100	True	GridWorld	SUNY	PartialObsDiscrete	Individual_Q	0.2	0.2	1000000	8
IndivQLearningVar/1589_158_9	decentralized	True	-100	True	GridWorld	SUNY	PartialObsDiscrete	Individual_Q	0.2	0.2	1000000	9
IndivQLearningVar/1590_159_0	decentralized	False	0	True	GridWorld	SUNY	PartialObsDiscrete	Individual_Q	0.2	0.01	1000000	0
IndivQLearningVar/1591_159_1	decentralized	False	0	True	GridWorld	SUNY	PartialObsDiscrete	Individual_Q	0.2	0.01	1000000	1
IndivQLearningVar/1592_159_2	decentralized	False	0	True	GridWorld	SUNY	PartialObsDiscrete	Individual_Q	0.2	0.01	1000000	2
IndivQLearningVar/1593_159_3	decentralized	False	0	True	GridWorld	SUNY	PartialObsDiscrete	Individual_Q	0.2	0.01	1000000	3
IndivQLearningVar/1594_159_4	decentralized	False	0	True	GridWorld	SUNY	PartialObsDiscrete	Individual_Q	0.2	0.01	1000000	4
IndivQLearningVar/1595_159_5	decentralized	False	0	True	GridWorld	SUNY	PartialObsDiscrete	Individual_Q	0.2	0.01	1000000	5
IndivQLearningVar/1596_159_6	decentralized	False	0	True	GridWorld	SUNY	PartialObsDiscrete	Individual_Q	0.2	0.01	1000000	6
IndivQLearningVar/1597_159_7	decentralized	False	0	True	GridWorld	SUNY	PartialObsDiscrete	Individual_Q	0.2	0.01	1000000	7
IndivQLearningVar/1598_159_8	decentralized	False	0	True	GridWorld	SUNY	PartialObsDiscrete	Individual_Q	0.2	0.01	1000000	8
IndivQLearningVar/1599_159_9	decentralized	False	0	True	GridWorld	SUNY	PartialObsDiscrete	Individual_Q	0.2	0.01	1000000	9
IndivQLearningVar/1600_160_0	decentralized	True	-10	True	GridWorld	SUNY	PartialObsDiscrete	Individual_Q	0.2	0.01	1000000	0
IndivQLearningVar/1601_160_1	decentralized	True	-10	True	GridWorld	SUNY	PartialObsDiscrete	Individual_Q	0.2	0.01	1000000	1
IndivQLearningVar/1602_160_2	decentralized	True	-10	True	GridWorld	SUNY	PartialObsDiscrete	Individual_Q	0.2	0.01	1000000	2
IndivQLearningVar/1603_160_3	decentralized	True	-10	True	GridWorld	SUNY	PartialObsDiscrete	Individual_Q	0.2	0.01	1000000	3
IndivQLearningVar/1604_160_4	decentralized	True	-10	True	GridWorld	SUNY	PartialObsDiscrete	Individual_Q	0.2	0.01	1000000	4
IndivQLearningVar/1605_160_5	decentralized	True	-10	True	GridWorld	SUNY	PartialObsDiscrete	Individual_Q	0.2	0.01	1000000	5
IndivQLearningVar/1606_160_6	decentralized	True	-10	True	GridWorld	SUNY	PartialObsDiscrete	Individual_Q	0.2	0.01	1000000	6
IndivQLearningVar/1607_160_7	decentralized	True	-10	True	GridWorld	SUNY	PartialObsDiscrete	Individual_Q	0.2	0.01	1000000	7
IndivQLearningVar/1608_160_8	decentralized	True	-10	True	GridWorld	SUNY	PartialObsDiscrete	Individual_Q	0.2	0.01	1000000	8
IndivQLearningVar/1609_160_9	decentralized	True	-10	True	GridWorld	SUNY	PartialObsDiscrete	Individual_Q	0.2	0.01	1000000	9
IndivQLearningVar/1610_161_0	decentralized	True	-100	True	GridWorld	SUNY	PartialObsDiscrete	Individual_Q	0.2	0.01	1000000	0
IndivQLearningVar/1611_161_1	decentralized	True	-100	True	GridWorld	SUNY	PartialObsDiscrete	Individual_Q	0.2	0.01	1000000	1
IndivQLearningVar/1612_161_2	decentralized	True	-100	True	GridWorld	SUNY	PartialObsDiscrete	Individual_Q	0.2	0.01	1000000	2
IndivQLearningVar/1613_161_3	decentralized	True	-100	True	GridWorld	SUNY	PartialObsDiscrete	Individual_Q	0.2	0.01	1000000	3
IndivQLearningVar/1614_161_4	decentralized	True	-100	True	GridWorld	SUNY	PartialObsDiscrete	Individual_Q	0.2	0.01	1000000	4
IndivQLearningVar/1615_161_5	decentralized	True	-100	True	GridWorld	SUNY	PartialObsDiscrete	Individual_Q	0.2	0.01	1000000	5
IndivQLearningVar/1616_161_6	decentralized	True	-100	True	GridWorld	SUNY	PartialObsDiscrete	Individual_Q	0.2	0.01	1000000	6
IndivQLearningVar/1617_161_7	decentralized	True	-100	True	GridWorld	SUNY	PartialObsDiscrete	Individual_Q	0.2	0.01	1000000	7
IndivQLearningVar/1618_161_8	decentralized	True	-100	True	GridWorld	SUNY	PartialObsDiscrete	Individual_Q	0.2	0.01	1000000	8
IndivQLearningVar/1619_161_9	decentralized	True	-100	True	GridWorld	SUNY	PartialObsDiscrete	Individual_Q	0.2	0.01	1000000	9
IndivQLearningVar/1620_162_0	decentralized	False	0	True	GridWorld	SUNY	FullObsDiscrete	Individual_Q	0.2	0.2	1000000	0
IndivQLearningVar/1621_162_1	decentralized	False	0	True	GridWorld	SUNY	FullObsDiscrete	Individual_Q	0.2	0.2	1000000	1
IndivQLearningVar/1622_162_2	decentralized	False	0	True	GridWorld	SUNY	FullObsDiscrete	Individual_Q	0.2	0.2	1000000	2
IndivQLearningVar/1623_162_3	decentralized	False	0	True	GridWorld	SUNY	FullObsDiscrete	Individual_Q	0.2	0.2	1000000	3
IndivQLearningVar/1624_162_4	decentralized	False	0	True	GridWorld	SUNY	FullObsDiscrete	Individual_Q	0.2	0.2	1000000	4
IndivQLearningVar/1625_162_5	decentralized	False	0	True	GridWorld	SUNY	FullObsDiscrete	Individual_Q	0.2	0.2	1000000	5
IndivQLearningVar/1626_162_6	decentralized	False	0	True	GridWorld	SUNY	FullObsDiscrete	Individual_Q	0.2	0.2	1000000	6
IndivQLearningVar/1627_162_7	decentralized	False	0	True	GridWorld	SUNY	FullObsDiscrete	Individual_Q	0.2	0.2	1000000	7
IndivQLearningVar/1628_162_8	decentralized	False	0	True	GridWorld	SUNY	FullObsDiscrete	Individual_Q	0.2	0.2	1000000	8
IndivQLearningVar/1629_162_9	decentralized	False	0	True	GridWorld	SUNY	FullObsDiscrete	Individual_Q	0.2	0.2	1000000	9
IndivQLearningVar/1630_163_0	decentralized	True	-10	True	GridWorld	SUNY	FullObsDiscrete	Individual_Q	0.2	0.2	1000000	0
IndivQLearningVar/1631_163_1	decentralized	True	-10	True	GridWorld	SUNY	FullObsDiscrete	Individual_Q	0.2	0.2	1000000	1
IndivQLearningVar/1632_163_2	decentralized	True	-10	True	GridWorld	SUNY	FullObsDiscrete	Individual_Q	0.2	0.2	1000000	2
IndivQLearningVar/1633_163_3	decentralized	True	-10	True	GridWorld	SUNY	FullObsDiscrete	Individual_Q	0.2	0.2	1000000	3
IndivQLearningVar/1634_163_4	decentralized	True	-10	True	GridWorld	SUNY	FullObsDiscrete	Individual_Q	0.2	0.2	1000000	4
IndivQLearningVar/1635_163_5	decentralized	True	-10	True	GridWorld	SUNY	FullObsDiscrete	Individual_Q	0.2	0.2	1000000	5
IndivQLearningVar/1636_163_6	decentralized	True	-10	True	GridWorld	SUNY	FullObsDiscrete	Individual_Q	0.2	0.2	1000000	6
IndivQLearningVar/1637_163_7	decentralized	True	-10	True	GridWorld	SUNY	FullObsDiscrete	Individual_Q	0.2	0.2	1000000	7
IndivQLearningVar/1638_163_8	decentralized	True	-10	True	GridWorld	SUNY	FullObsDiscrete	Individual_Q	0.2	0.2	1000000	8
IndivQLearningVar/1639_163_9	decentralized	True	-10	True	GridWorld	SUNY	FullObsDiscrete	Individual_Q	0.2	0.2	1000000	9
IndivQLearningVar/1640_164_0	decentralized	True	-100	True	GridWorld	SUNY	FullObsDiscrete	Individual_Q	0.2	0.2	1000000	0
IndivQLearningVar/1641_164_1	decentralized	True	-100	True	GridWorld	SUNY	FullObsDiscrete	Individual_Q	0.2	0.2	1000000	1
IndivQLearningVar/1642_164_2	decentralized	True	-100	True	GridWorld	SUNY	FullObsDiscrete	Individual_Q	0.2	0.2	1000000	2
IndivQLearningVar/1643_164_3	decentralized	True	-100	True	GridWorld	SUNY	FullObsDiscrete	Individual_Q	0.2	0.2	1000000	3
IndivQLearningVar/1644_164_4	decentralized	True	-100	True	GridWorld	SUNY	FullObsDiscrete	Individual_Q	0.2	0.2	1000000	4
IndivQLearningVar/1645_164_5	decentralized	True	-100	True	GridWorld	SUNY	FullObsDiscrete	Individual_Q	0.2	0.2	1000000	5
IndivQLearningVar/1646_164_6	decentralized	True	-100	True	GridWorld	SUNY	FullObsDiscrete	Individual_Q	0.2	0.2	1000000	6
IndivQLearningVar/1647_164_7	decentralized	True	-100	True	GridWorld	SUNY	FullObsDiscrete	Individual_Q	0.2	0.2	1000000	7
IndivQLearningVar/1648_164_8	decentralized	True	-100	True	GridWorld	SUNY	FullObsDiscrete	Individual_Q	0.2	0.2	1000000	8
IndivQLearningVar/1649_164_9	decentralized	True	-100	True	GridWorld	SUNY	FullObsDiscrete	Individual_Q	0.2	0.2	1000000	9
IndivQLearningVar/1650_165_0	decentralized	False	0	True	GridWorld	SUNY	FullObsDiscrete	Individual_Q	0.2	0.01	1000000	0
IndivQLearningVar/1651_165_1	decentralized	False	0	True	GridWorld	SUNY	FullObsDiscrete	Individual_Q	0.2	0.01	1000000	1
IndivQLearningVar/1652_165_2	decentralized	False	0	True	GridWorld	SUNY	FullObsDiscrete	Individual_Q	0.2	0.01	1000000	2
IndivQLearningVar/1653_165_3	decentralized	False	0	True	GridWorld	SUNY	FullObsDiscrete	Individual_Q	0.2	0.01	1000000	3
IndivQLearningVar/1654_165_4	decentralized	False	0	True	GridWorld	SUNY	FullObsDiscrete	Individual_Q	0.2	0.01	1000000	4
IndivQLearningVar/1655_165_5	decentralized	False	0	True	GridWorld	SUNY	FullObsDiscrete	Individual_Q	0.2	0.01	1000000	5
IndivQLearningVar/1656_165_6	decentralized	False	0	True	GridWorld	SUNY	FullObsDiscrete	Individual_Q	0.2	0.01	1000000	6
IndivQLearningVar/1657_165_7	decentralized	False	0	True	GridWorld	SUNY	FullObsDiscrete	Individual_Q	0.2	0.01	1000000	7
IndivQLearningVar/1658_165_8	decentralized	False	0	True	GridWorld	SUNY	FullObsDiscrete	Individual_Q	0.2	0.01	1000000	8
IndivQLearningVar/1659_165_9	decentralized	False	0	True	GridWorld	SUNY	FullObsDiscrete	Individual_Q	0.2	0.01	1000000	9
IndivQLearningVar/1660_166_0	decentralized	True	-10	True	GridWorld	SUNY	FullObsDiscrete	Individual_Q	0.2	0.01	1000000	0
IndivQLearningVar/1661_166_1	decentralized	True	-10	True	GridWorld	SUNY	FullObsDiscrete	Individual_Q	0.2	0.01	1000000	1
IndivQLearningVar/1662_166_2	decentralized	True	-10	True	GridWorld	SUNY	FullObsDiscrete	Individual_Q	0.2	0.01	1000000	2
IndivQLearningVar/1663_166_3	decentralized	True	-10	True	GridWorld	SUNY	FullObsDiscrete	Individual_Q	0.2	0.01	1000000	3
IndivQLearningVar/1664_166_4	decentralized	True	-10	True	GridWorld	SUNY	FullObsDiscrete	Individual_Q	0.2	0.01	1000000	4
IndivQLearningVar/1665_166_5	decentralized	True	-10	True	GridWorld	SUNY	FullObsDiscrete	Individual_Q	0.2	0.01	1000000	5
IndivQLearningVar/1666_166_6	decentralized	True	-10	True	GridWorld	SUNY	FullObsDiscrete	Individual_Q	0.2	0.01	1000000	6
IndivQLearningVar/1667_166_7	decentralized	True	-10	True	GridWorld	SUNY	FullObsDiscrete	Individual_Q	0.2	0.01	1000000	7
IndivQLearningVar/1668_166_8	decentralized	True	-10	True	GridWorld	SUNY	FullObsDiscrete	Individual_Q	0.2	0.01	1000000	8
IndivQLearningVar/1669_166_9	decentralized	True	-10	True	GridWorld	SUNY	FullObsDiscrete	Individual_Q	0.2	0.01	1000000	9
IndivQLearningVar/1670_167_0	decentralized	True	-100	True	GridWorld	SUNY	FullObsDiscrete	Individual_Q	0.2	0.01	1000000	0
IndivQLearningVar/1671_167_1	decentralized	True	-100	True	GridWorld	SUNY	FullObsDiscrete	Individual_Q	0.2	0.01	1000000	1
IndivQLearningVar/1672_167_2	decentralized	True	-100	True	GridWorld	SUNY	FullObsDiscrete	Individual_Q	0.2	0.01	1000000	2
IndivQLearningVar/1673_167_3	decentralized	True	-100	True	GridWorld	SUNY	FullObsDiscrete	Individual_Q	0.2	0.01	1000000	3
IndivQLearningVar/1674_167_4	decentralized	True	-100	True	GridWorld	SUNY	FullObsDiscrete	Individual_Q	0.2	0.01	1000000	4
IndivQLearningVar/1675_167_5	decentralized	True	-100	True	GridWorld	SUNY	FullObsDiscrete	Individual_Q	0.2	0.01	1000000	5
IndivQLearningVar/1676_167_6	decentralized	True	-100	True	GridWorld	SUNY	FullObsDiscrete	Individual_Q	0.2	0.01	1000000	6
IndivQLearningVar/1677_167_7	decentralized	True	-100	True	GridWorld	SUNY	FullObsDiscrete	Individual_Q	0.2	0.01	1000000	7
IndivQLearningVar/1678_167_8	decentralized	True	-100	True	GridWorld	SUNY	FullObsDiscrete	Individual_Q	0.2	0.01	1000000	8
IndivQLearningVar/1679_167_9	decentralized	True	-100	True	GridWorld	SUNY	FullObsDiscrete	Individual_Q	0.2	0.01	1000000	9
IndivQLearningVar/1680_168_0	none	False	0	True	GridWorld	SUNY	PartialObsDiscrete	Individual_Q	0.2	0.2	1000000	0
IndivQLearningVar/1681_168_1	none	False	0	True	GridWorld	SUNY	PartialObsDiscrete	Individual_Q	0.2	0.2	1000000	1
IndivQLearningVar/1682_168_2	none	False	0	True	GridWorld	SUNY	PartialObsDiscrete	Individual_Q	0.2	0.2	1000000	2
IndivQLearningVar/1683_168_3	none	False	0	True	GridWorld	SUNY	PartialObsDiscrete	Individual_Q	0.2	0.2	1000000	3
IndivQLearningVar/1684_168_4	none	False	0	True	GridWorld	SUNY	PartialObsDiscrete	Individual_Q	0.2	0.2	1000000	4
IndivQLearningVar/1685_168_5	none	False	0	True	GridWorld	SUNY	PartialObsDiscrete	Individual_Q	0.2	0.2	1000000	5
IndivQLearningVar/1686_168_6	none	False	0	True	GridWorld	SUNY	PartialObsDiscrete	Individual_Q	0.2	0.2	1000000	6
IndivQLearningVar/1687_168_7	none	False	0	True	GridWorld	SUNY	PartialObsDiscrete	Individual_Q	0.2	0.2	1000000	7
IndivQLearningVar/1688_168_8	none	False	0	True	GridWorld	SUNY	PartialObsDiscrete	Individual_Q	0.2	0.2	1000000	8
IndivQLearningVar/1689_168_9	none	False	0	True	GridWorld	SUNY	PartialObsDiscrete	Individual_Q	0.2	0.2	1000000	9
IndivQLearningVar/1690_169_0	none	True	-10	True	GridWorld	SUNY	PartialObsDiscrete	Individual_Q	0.2	0.2	1000000	0
IndivQLearningVar/1691_169_1	none	True	-10	True	GridWorld	SUNY	PartialObsDiscrete	Individual_Q	0.2	0.2	1000000	1
IndivQLearningVar/1692_169_2	none	True	-10	True	GridWorld	SUNY	PartialObsDiscrete	Individual_Q	0.2	0.2	1000000	2
IndivQLearningVar/1693_169_3	none	True	-10	True	GridWorld	SUNY	PartialObsDiscrete	Individual_Q	0.2	0.2	1000000	3
IndivQLearningVar/1694_169_4	none	True	-10	True	GridWorld	SUNY	PartialObsDiscrete	Individual_Q	0.2	0.2	1000000	4
IndivQLearningVar/1695_169_5	none	True	-10	True	GridWorld	SUNY	PartialObsDiscrete	Individual_Q	0.2	0.2	1000000	5
IndivQLearningVar/1696_169_6	none	True	-10	True	GridWorld	SUNY	PartialObsDiscrete	Individual_Q	0.2	0.2	1000000	6
IndivQLearningVar/1697_169_7	none	True	-10	True	GridWorld	SUNY	PartialObsDiscrete	Individual_Q	0.2	0.2	1000000	7
IndivQLearningVar/1698_169_8	none	True	-10	True	GridWorld	SUNY	PartialObsDiscrete	Individual_Q	0.2	0.2	1000000	8
IndivQLearningVar/1699_169_9	none	True	-10	True	GridWorld	SUNY	PartialObsDiscrete	Individual_Q	0.2	0.2	1000000	9
IndivQLearningVar/1700_170_0	none	True	-100	True	GridWorld	SUNY	PartialObsDiscrete	Individual_Q	0.2	0.2	1000000	0
IndivQLearningVar/1701_170_1	none	True	-100	True	GridWorld	SUNY	PartialObsDiscrete	Individual_Q	0.2	0.2	1000000	1
IndivQLearningVar/1702_170_2	none	True	-100	True	GridWorld	SUNY	PartialObsDiscrete	Individual_Q	0.2	0.2	1000000	2
IndivQLearningVar/1703_170_3	none	True	-100	True	GridWorld	SUNY	PartialObsDiscrete	Individual_Q	0.2	0.2	1000000	3
IndivQLearningVar/1704_170_4	none	True	-100	True	GridWorld	SUNY	PartialObsDiscrete	Individual_Q	0.2	0.2	1000000	4
IndivQLearningVar/1705_170_5	none	True	-100	True	GridWorld	SUNY	PartialObsDiscrete	Individual_Q	0.2	0.2	1000000	5
IndivQLearningVar/1706_170_6	none	True	-100	True	GridWorld	SUNY	PartialObsDiscrete	Individual_Q	0.2	0.2	1000000	6
IndivQLearningVar/1707_170_7	none	True	-100	True	GridWorld	SUNY	PartialObsDiscrete	Individual_Q	0.2	0.2	1000000	7
IndivQLearningVar/1708_170_8	none	True	-100	True	GridWorld	SUNY	PartialObsDiscrete	Individual_Q	0.2	0.2	1000000	8
IndivQLearningVar/1709_170_9	none	True	-100	True	GridWorld	SUNY	PartialObsDiscrete	Individual_Q	0.2	0.2	1000000	9
IndivQLearningVar/1710_171_0	none	False	0	True	GridWorld	SUNY	PartialObsDiscrete	Individual_Q	0.2	0.01	1000000	0
IndivQLearningVar/1711_171_1	none	False	0	True	GridWorld	SUNY	PartialObsDiscrete	Individual_Q	0.2	0.01	1000000	1
IndivQLearningVar/1712_171_2	none	False	0	True	GridWorld	SUNY	PartialObsDiscrete	Individual_Q	0.2	0.01	1000000	2
IndivQLearningVar/1713_171_3	none	False	0	True	GridWorld	SUNY	PartialObsDiscrete	Individual_Q	0.2	0.01	1000000	3
IndivQLearningVar/1714_171_4	none	False	0	True	GridWorld	SUNY	PartialObsDiscrete	Individual_Q	0.2	0.01	1000000	4
IndivQLearningVar/1715_171_5	none	False	0	True	GridWorld	SUNY	PartialObsDiscrete	Individual_Q	0.2	0.01	1000000	5
IndivQLearningVar/1716_171_6	none	False	0	True	GridWorld	SUNY	PartialObsDiscrete	Individual_Q	0.2	0.01	1000000	6
IndivQLearningVar/1717_171_7	none	False	0	True	GridWorld	SUNY	PartialObsDiscrete	Individual_Q	0.2	0.01	1000000	7
IndivQLearningVar/1718_171_8	none	False	0	True	GridWorld	SUNY	PartialObsDiscrete	Individual_Q	0.2	0.01	1000000	8
IndivQLearningVar/1719_171_9	none	False	0	True	GridWorld	SUNY	PartialObsDiscrete	Individual_Q	0.2	0.01	1000000	9
IndivQLearningVar/1720_172_0	none	True	-10	True	GridWorld	SUNY	PartialObsDiscrete	Individual_Q	0.2	0.01	1000000	0
IndivQLearningVar/1721_172_1	none	True	-10	True	GridWorld	SUNY	PartialObsDiscrete	Individual_Q	0.2	0.01	1000000	1
IndivQLearningVar/1722_172_2	none	True	-10	True	GridWorld	SUNY	PartialObsDiscrete	Individual_Q	0.2	0.01	1000000	2
IndivQLearningVar/1723_172_3	none	True	-10	True	GridWorld	SUNY	PartialObsDiscrete	Individual_Q	0.2	0.01	1000000	3
IndivQLearningVar/1724_172_4	none	True	-10	True	GridWorld	SUNY	PartialObsDiscrete	Individual_Q	0.2	0.01	1000000	4
IndivQLearningVar/1725_172_5	none	True	-10	True	GridWorld	SUNY	PartialObsDiscrete	Individual_Q	0.2	0.01	1000000	5
IndivQLearningVar/1726_172_6	none	True	-10	True	GridWorld	SUNY	PartialObsDiscrete	Individual_Q	0.2	0.01	1000000	6
IndivQLearningVar/1727_172_7	none	True	-10	True	GridWorld	SUNY	PartialObsDiscrete	Individual_Q	0.2	0.01	1000000	7
IndivQLearningVar/1728_172_8	none	True	-10	True	GridWorld	SUNY	PartialObsDiscrete	Individual_Q	0.2	0.01	1000000	8
IndivQLearningVar/1729_172_9	none	True	-10	True	GridWorld	SUNY	PartialObsDiscrete	Individual_Q	0.2	0.01	1000000	9
IndivQLearningVar/1730_173_0	none	True	-100	True	GridWorld	SUNY	PartialObsDiscrete	Individual_Q	0.2	0.01	1000000	0
IndivQLearningVar/1731_173_1	none	True	-100	True	GridWorld	SUNY	PartialObsDiscrete	Individual_Q	0.2	0.01	1000000	1
IndivQLearningVar/1732_173_2	none	True	-100	True	GridWorld	SUNY	PartialObsDiscrete	Individual_Q	0.2	0.01	1000000	2
IndivQLearningVar/1733_173_3	none	True	-100	True	GridWorld	SUNY	PartialObsDiscrete	Individual_Q	0.2	0.01	1000000	3
IndivQLearningVar/1734_173_4	none	True	-100	True	GridWorld	SUNY	PartialObsDiscrete	Individual_Q	0.2	0.01	1000000	4
IndivQLearningVar/1735_173_5	none	True	-100	True	GridWorld	SUNY	PartialObsDiscrete	Individual_Q	0.2	0.01	1000000	5
IndivQLearningVar/1736_173_6	none	True	-100	True	GridWorld	SUNY	PartialObsDiscrete	Individual_Q	0.2	0.01	1000000	6
IndivQLearningVar/1737_173_7	none	True	-100	True	GridWorld	SUNY	PartialObsDiscrete	Individual_Q	0.2	0.01	1000000	7
IndivQLearningVar/1738_173_8	none	True	-100	True	GridWorld	SUNY	PartialObsDiscrete	Individual_Q	0.2	0.01	1000000	8
IndivQLearningVar/1739_173_9	none	True	-100	True	GridWorld	SUNY	PartialObsDiscrete	Individual_Q	0.2	0.01	1000000	9
IndivQLearningVar/1740_174_0	none	False	0	True	GridWorld	SUNY	FullObsDiscrete	Individual_Q	0.2	0.2	1000000	0
IndivQLearningVar/1741_174_1	none	False	0	True	GridWorld	SUNY	FullObsDiscrete	Individual_Q	0.2	0.2	1000000	1
IndivQLearningVar/1742_174_2	none	False	0	True	GridWorld	SUNY	FullObsDiscrete	Individual_Q	0.2	0.2	1000000	2
IndivQLearningVar/1743_174_3	none	False	0	True	GridWorld	SUNY	FullObsDiscrete	Individual_Q	0.2	0.2	1000000	3
IndivQLearningVar/1744_174_4	none	False	0	True	GridWorld	SUNY	FullObsDiscrete	Individual_Q	0.2	0.2	1000000	4
IndivQLearningVar/1745_174_5	none	False	0	True	GridWorld	SUNY	FullObsDiscrete	Individual_Q	0.2	0.2	1000000	5
IndivQLearningVar/1746_174_6	none	False	0	True	GridWorld	SUNY	FullObsDiscrete	Individual_Q	0.2	0.2	1000000	6
IndivQLearningVar/1747_174_7	none	False	0	True	GridWorld	SUNY	FullObsDiscrete	Individual_Q	0.2	0.2	1000000	7
IndivQLearningVar/1748_174_8	none	False	0	True	GridWorld	SUNY	FullObsDiscrete	Individual_Q	0.2	0.2	1000000	8
IndivQLearningVar/1749_174_9	none	False	0	True	GridWorld	SUNY	FullObsDiscrete	Individual_Q	0.2	0.2	1000000	9
IndivQLearningVar/1750_175_0	none	True	-10	True	GridWorld	SUNY	FullObsDiscrete	Individual_Q	0.2	0.2	1000000	0
IndivQLearningVar/1751_175_1	none	True	-10	True	GridWorld	SUNY	FullObsDiscrete	Individual_Q	0.2	0.2	1000000	1
IndivQLearningVar/1752_175_2	none	True	-10	True	GridWorld	SUNY	FullObsDiscrete	Individual_Q	0.2	0.2	1000000	2
IndivQLearningVar/1753_175_3	none	True	-10	True	GridWorld	SUNY	FullObsDiscrete	Individual_Q	0.2	0.2	1000000	3
IndivQLearningVar/1754_175_4	none	True	-10	True	GridWorld	SUNY	FullObsDiscrete	Individual_Q	0.2	0.2	1000000	4
IndivQLearningVar/1755_175_5	none	True	-10	True	GridWorld	SUNY	FullObsDiscrete	Individual_Q	0.2	0.2	1000000	5
IndivQLearningVar/1756_175_6	none	True	-10	True	GridWorld	SUNY	FullObsDiscrete	Individual_Q	0.2	0.2	1000000	6
IndivQLearningVar/1757_175_7	none	True	-10	True	GridWorld	SUNY	FullObsDiscrete	Individual_Q	0.2	0.2	1000000	7
IndivQLearningVar/1758_175_8	none	True	-10	True	GridWorld	SUNY	FullObsDiscrete	Individual_Q	0.2	0.2	1000000	8
IndivQLearningVar/1759_175_9	none	True	-10	True	GridWorld	SUNY	FullObsDiscrete	Individual_Q	0.2	0.2	1000000	9
IndivQLearningVar/1760_176_0	none	True	-100	True	GridWorld	SUNY	FullObsDiscrete	Individual_Q	0.2	0.2	1000000	0
IndivQLearningVar/1761_176_1	none	True	-100	True	GridWorld	SUNY	FullObsDiscrete	Individual_Q	0.2	0.2	1000000	1
IndivQLearningVar/1762_176_2	none	True	-100	True	GridWorld	SUNY	FullObsDiscrete	Individual_Q	0.2	0.2	1000000	2
IndivQLearningVar/1763_176_3	none	True	-100	True	GridWorld	SUNY	FullObsDiscrete	Individual_Q	0.2	0.2	1000000	3
IndivQLearningVar/1764_176_4	none	True	-100	True	GridWorld	SUNY	FullObsDiscrete	Individual_Q	0.2	0.2	1000000	4
IndivQLearningVar/1765_176_5	none	True	-100	True	GridWorld	SUNY	FullObsDiscrete	Individual_Q	0.2	0.2	1000000	5
IndivQLearningVar/1766_176_6	none	True	-100	True	GridWorld	SUNY	FullObsDiscrete	Individual_Q	0.2	0.2	1000000	6
IndivQLearningVar/1767_176_7	none	True	-100	True	GridWorld	SUNY	FullObsDiscrete	Individual_Q	0.2	0.2	1000000	7
IndivQLearningVar/1768_176_8	none	True	-100	True	GridWorld	SUNY	FullObsDiscrete	Individual_Q	0.2	0.2	1000000	8
IndivQLearningVar/1769_176_9	none	True	-100	True	GridWorld	SUNY	FullObsDiscrete	Individual_Q	0.2	0.2	1000000	9
IndivQLearningVar/1770_177_0	none	False	0	True	GridWorld	SUNY	FullObsDiscrete	Individual_Q	0.2	0.01	1000000	0
IndivQLearningVar/1771_177_1	none	False	0	True	GridWorld	SUNY	FullObsDiscrete	Individual_Q	0.2	0.01	1000000	1
IndivQLearningVar/1772_177_2	none	False	0	True	GridWorld	SUNY	FullObsDiscrete	Individual_Q	0.2	0.01	1000000	2
IndivQLearningVar/1773_177_3	none	False	0	True	GridWorld	SUNY	FullObsDiscrete	Individual_Q	0.2	0.01	1000000	3
IndivQLearningVar/1774_177_4	none	False	0	True	GridWorld	SUNY	FullObsDiscrete	Individual_Q	0.2	0.01	1000000	4
IndivQLearningVar/1775_177_5	none	False	0	True	GridWorld	SUNY	FullObsDiscrete	Individual_Q	0.2	0.01	1000000	5
IndivQLearningVar/1776_177_6	none	False	0	True	GridWorld	SUNY	FullObsDiscrete	Individual_Q	0.2	0.01	1000000	6
IndivQLearningVar/1777_177_7	none	False	0	True	GridWorld	SUNY	FullObsDiscrete	Individual_Q	0.2	0.01	1000000	7
IndivQLearningVar/1778_177_8	none	False	0	True	GridWorld	SUNY	FullObsDiscrete	Individual_Q	0.2	0.01	1000000	8
IndivQLearningVar/1779_177_9	none	False	0	True	GridWorld	SUNY	FullObsDiscrete	Individual_Q	0.2	0.01	1000000	9
IndivQLearningVar/1780_178_0	none	True	-10	True	GridWorld	SUNY	FullObsDiscrete	Individual_Q	0.2	0.01	1000000	0
IndivQLearningVar/1781_178_1	none	True	-10	True	GridWorld	SUNY	FullObsDiscrete	Individual_Q	0.2	0.01	1000000	1
IndivQLearningVar/1782_178_2	none	True	-10	True	GridWorld	SUNY	FullObsDiscrete	Individual_Q	0.2	0.01	1000000	2
IndivQLearningVar/1783_178_3	none	True	-10	True	GridWorld	SUNY	FullObsDiscrete	Individual_Q	0.2	0.01	1000000	3
IndivQLearningVar/1784_178_4	none	True	-10	True	GridWorld	SUNY	FullObsDiscrete	Individual_Q	0.2	0.01	1000000	4
IndivQLearningVar/1785_178_5	none	True	-10	True	GridWorld	SUNY	FullObsDiscrete	Individual_Q	0.2	0.01	1000000	5
IndivQLearningVar/1786_178_6	none	True	-10	True	GridWorld	SUNY	FullObsDiscrete	Individual_Q	0.2	0.01	1000000	6
IndivQLearningVar/1787_178_7	none	True	-10	True	GridWorld	SUNY	FullObsDiscrete	Individual_Q	0.2	0.01	1000000	7
IndivQLearningVar/1788_178_8	none	True	-10	True	GridWorld	SUNY	FullObsDiscrete	Individual_Q	0.2	0.01	1000000	8
IndivQLearningVar/1789_178_9	none	True	-10	True	GridWorld	SUNY	FullObsDiscrete	Individual_Q	0.2	0.01	1000000	9
IndivQLearningVar/1790_179_0	none	True	-100	True	GridWorld	SUNY	FullObsDiscrete	Individual_Q	0.2	0.01	1000000	0
IndivQLearningVar/1791_179_1	none	True	-100	True	GridWorld	SUNY	FullObsDiscrete	Individual_Q	0.2	0.01	1000000	1
IndivQLearningVar/1792_179_2	none	True	-100	True	GridWorld	SUNY	FullObsDiscrete	Individual_Q	0.2	0.01	1000000	2
IndivQLearningVar/1793_179_3	none	True	-100	True	GridWorld	SUNY	FullObsDiscrete	Individual_Q	0.2	0.01	1000000	3
IndivQLearningVar/1794_179_4	none	True	-100	True	GridWorld	SUNY	FullObsDiscrete	Individual_Q	0.2	0.01	1000000	4
IndivQLearningVar/1795_179_5	none	True	-100	True	GridWorld	SUNY	FullObsDiscrete	Individual_Q	0.2	0.01	1000000	5
IndivQLearningVar/1796_179_6	none	True	-100	True	GridWorld	SUNY	FullObsDiscrete	Individual_Q	0.2	0.01	1000000	6
IndivQLearningVar/1797_179_7	none	True	-100	True	GridWorld	SUNY	FullObsDiscrete	Individual_Q	0.2	0.01	1000000	7
IndivQLearningVar/1798_179_8	none	True	-100	True	GridWorld	SUNY	FullObsDiscrete	Individual_Q	0.2	0.01	1000000	8
IndivQLearningVar/1799_179_9	none	True	-100	True	GridWorld	SUNY	FullObsDiscrete	Individual_Q	0.2	0.01	1000000	9
IndivQLearningVar/1800_180_0	centralized	False	0	False	GridWorld	SUNY	PartialObsDiscrete	Individual_Q	0.2	0.2	1000000	0
IndivQLearningVar/1801_180_1	centralized	False	0	False	GridWorld	SUNY	PartialObsDiscrete	Individual_Q	0.2	0.2	1000000	1
IndivQLearningVar/1802_180_2	centralized	False	0	False	GridWorld	SUNY	PartialObsDiscrete	Individual_Q	0.2	0.2	1000000	2
IndivQLearningVar/1803_180_3	centralized	False	0	False	GridWorld	SUNY	PartialObsDiscrete	Individual_Q	0.2	0.2	1000000	3
IndivQLearningVar/1804_180_4	centralized	False	0	False	GridWorld	SUNY	PartialObsDiscrete	Individual_Q	0.2	0.2	1000000	4
IndivQLearningVar/1805_180_5	centralized	False	0	False	GridWorld	SUNY	PartialObsDiscrete	Individual_Q	0.2	0.2	1000000	5
IndivQLearningVar/1806_180_6	centralized	False	0	False	GridWorld	SUNY	PartialObsDiscrete	Individual_Q	0.2	0.2	1000000	6
IndivQLearningVar/1807_180_7	centralized	False	0	False	GridWorld	SUNY	PartialObsDiscrete	Individual_Q	0.2	0.2	1000000	7
IndivQLearningVar/1808_180_8	centralized	False	0	False	GridWorld	SUNY	PartialObsDiscrete	Individual_Q	0.2	0.2	1000000	8
IndivQLearningVar/1809_180_9	centralized	False	0	False	GridWorld	SUNY	PartialObsDiscrete	Individual_Q	0.2	0.2	1000000	9
IndivQLearningVar/1810_181_0	centralized	True	-10	False	GridWorld	SUNY	PartialObsDiscrete	Individual_Q	0.2	0.2	1000000	0
IndivQLearningVar/1811_181_1	centralized	True	-10	False	GridWorld	SUNY	PartialObsDiscrete	Individual_Q	0.2	0.2	1000000	1
IndivQLearningVar/1812_181_2	centralized	True	-10	False	GridWorld	SUNY	PartialObsDiscrete	Individual_Q	0.2	0.2	1000000	2
IndivQLearningVar/1813_181_3	centralized	True	-10	False	GridWorld	SUNY	PartialObsDiscrete	Individual_Q	0.2	0.2	1000000	3
IndivQLearningVar/1814_181_4	centralized	True	-10	False	GridWorld	SUNY	PartialObsDiscrete	Individual_Q	0.2	0.2	1000000	4
IndivQLearningVar/1815_181_5	centralized	True	-10	False	GridWorld	SUNY	PartialObsDiscrete	Individual_Q	0.2	0.2	1000000	5
IndivQLearningVar/1816_181_6	centralized	True	-10	False	GridWorld	SUNY	PartialObsDiscrete	Individual_Q	0.2	0.2	1000000	6
IndivQLearningVar/1817_181_7	centralized	True	-10	False	GridWorld	SUNY	PartialObsDiscrete	Individual_Q	0.2	0.2	1000000	7
IndivQLearningVar/1818_181_8	centralized	True	-10	False	GridWorld	SUNY	PartialObsDiscrete	Individual_Q	0.2	0.2	1000000	8
IndivQLearningVar/1819_181_9	centralized	True	-10	False	GridWorld	SUNY	PartialObsDiscrete	Individual_Q	0.2	0.2	1000000	9
IndivQLearningVar/1820_182_0	centralized	True	-100	False	GridWorld	SUNY	PartialObsDiscrete	Individual_Q	0.2	0.2	1000000	0
IndivQLearningVar/1821_182_1	centralized	True	-100	False	GridWorld	SUNY	PartialObsDiscrete	Individual_Q	0.2	0.2	1000000	1
IndivQLearningVar/1822_182_2	centralized	True	-100	False	GridWorld	SUNY	PartialObsDiscrete	Individual_Q	0.2	0.2	1000000	2
IndivQLearningVar/1823_182_3	centralized	True	-100	False	GridWorld	SUNY	PartialObsDiscrete	Individual_Q	0.2	0.2	1000000	3
IndivQLearningVar/1824_182_4	centralized	True	-100	False	GridWorld	SUNY	PartialObsDiscrete	Individual_Q	0.2	0.2	1000000	4
IndivQLearningVar/1825_182_5	centralized	True	-100	False	GridWorld	SUNY	PartialObsDiscrete	Individual_Q	0.2	0.2	1000000	5
IndivQLearningVar/1826_182_6	centralized	True	-100	False	GridWorld	SUNY	PartialObsDiscrete	Individual_Q	0.2	0.2	1000000	6
IndivQLearningVar/1827_182_7	centralized	True	-100	False	GridWorld	SUNY	PartialObsDiscrete	Individual_Q	0.2	0.2	1000000	7
IndivQLearningVar/1828_182_8	centralized	True	-100	False	GridWorld	SUNY	PartialObsDiscrete	Individual_Q	0.2	0.2	1000000	8
IndivQLearningVar/1829_182_9	centralized	True	-100	False	GridWorld	SUNY	PartialObsDiscrete	Individual_Q	0.2	0.2	1000000	9
IndivQLearningVar/1830_183_0	centralized	False	0	False	GridWorld	SUNY	PartialObsDiscrete	Individual_Q	0.2	0.01	1000000	0
IndivQLearningVar/1831_183_1	centralized	False	0	False	GridWorld	SUNY	PartialObsDiscrete	Individual_Q	0.2	0.01	1000000	1
IndivQLearningVar/1832_183_2	centralized	False	0	False	GridWorld	SUNY	PartialObsDiscrete	Individual_Q	0.2	0.01	1000000	2
IndivQLearningVar/1833_183_3	centralized	False	0	False	GridWorld	SUNY	PartialObsDiscrete	Individual_Q	0.2	0.01	1000000	3
IndivQLearningVar/1834_183_4	centralized	False	0	False	GridWorld	SUNY	PartialObsDiscrete	Individual_Q	0.2	0.01	1000000	4
IndivQLearningVar/1835_183_5	centralized	False	0	False	GridWorld	SUNY	PartialObsDiscrete	Individual_Q	0.2	0.01	1000000	5
IndivQLearningVar/1836_183_6	centralized	False	0	False	GridWorld	SUNY	PartialObsDiscrete	Individual_Q	0.2	0.01	1000000	6
IndivQLearningVar/1837_183_7	centralized	False	0	False	GridWorld	SUNY	PartialObsDiscrete	Individual_Q	0.2	0.01	1000000	7
IndivQLearningVar/1838_183_8	centralized	False	0	False	GridWorld	SUNY	PartialObsDiscrete	Individual_Q	0.2	0.01	1000000	8
IndivQLearningVar/1839_183_9	centralized	False	0	False	GridWorld	SUNY	PartialObsDiscrete	Individual_Q	0.2	0.01	1000000	9
IndivQLearningVar/1840_184_0	centralized	True	-10	False	GridWorld	SUNY	PartialObsDiscrete	Individual_Q	0.2	0.01	1000000	0
IndivQLearningVar/1841_184_1	centralized	True	-10	False	GridWorld	SUNY	PartialObsDiscrete	Individual_Q	0.2	0.01	1000000	1
IndivQLearningVar/1842_184_2	centralized	True	-10	False	GridWorld	SUNY	PartialObsDiscrete	Individual_Q	0.2	0.01	1000000	2
IndivQLearningVar/1843_184_3	centralized	True	-10	False	GridWorld	SUNY	PartialObsDiscrete	Individual_Q	0.2	0.01	1000000	3
IndivQLearningVar/1844_184_4	centralized	True	-10	False	GridWorld	SUNY	PartialObsDiscrete	Individual_Q	0.2	0.01	1000000	4
IndivQLearningVar/1845_184_5	centralized	True	-10	False	GridWorld	SUNY	PartialObsDiscrete	Individual_Q	0.2	0.01	1000000	5
IndivQLearningVar/1846_184_6	centralized	True	-10	False	GridWorld	SUNY	PartialObsDiscrete	Individual_Q	0.2	0.01	1000000	6
IndivQLearningVar/1847_184_7	centralized	True	-10	False	GridWorld	SUNY	PartialObsDiscrete	Individual_Q	0.2	0.01	1000000	7
IndivQLearningVar/1848_184_8	centralized	True	-10	False	GridWorld	SUNY	PartialObsDiscrete	Individual_Q	0.2	0.01	1000000	8
IndivQLearningVar/1849_184_9	centralized	True	-10	False	GridWorld	SUNY	PartialObsDiscrete	Individual_Q	0.2	0.01	1000000	9
IndivQLearningVar/1850_185_0	centralized	True	-100	False	GridWorld	SUNY	PartialObsDiscrete	Individual_Q	0.2	0.01	1000000	0
IndivQLearningVar/1851_185_1	centralized	True	-100	False	GridWorld	SUNY	PartialObsDiscrete	Individual_Q	0.2	0.01	1000000	1
IndivQLearningVar/1852_185_2	centralized	True	-100	False	GridWorld	SUNY	PartialObsDiscrete	Individual_Q	0.2	0.01	1000000	2
IndivQLearningVar/1853_185_3	centralized	True	-100	False	GridWorld	SUNY	PartialObsDiscrete	Individual_Q	0.2	0.01	1000000	3
IndivQLearningVar/1854_185_4	centralized	True	-100	False	GridWorld	SUNY	PartialObsDiscrete	Individual_Q	0.2	0.01	1000000	4
IndivQLearningVar/1855_185_5	centralized	True	-100	False	GridWorld	SUNY	PartialObsDiscrete	Individual_Q	0.2	0.01	1000000	5
IndivQLearningVar/1856_185_6	centralized	True	-100	False	GridWorld	SUNY	PartialObsDiscrete	Individual_Q	0.2	0.01	1000000	6
IndivQLearningVar/1857_185_7	centralized	True	-100	False	GridWorld	SUNY	PartialObsDiscrete	Individual_Q	0.2	0.01	1000000	7
IndivQLearningVar/1858_185_8	centralized	True	-100	False	GridWorld	SUNY	PartialObsDiscrete	Individual_Q	0.2	0.01	1000000	8
IndivQLearningVar/1859_185_9	centralized	True	-100	False	GridWorld	SUNY	PartialObsDiscrete	Individual_Q	0.2	0.01	1000000	9
IndivQLearningVar/1860_186_0	centralized	False	0	False	GridWorld	SUNY	FullObsDiscrete	Individual_Q	0.2	0.2	1000000	0
IndivQLearningVar/1861_186_1	centralized	False	0	False	GridWorld	SUNY	FullObsDiscrete	Individual_Q	0.2	0.2	1000000	1
IndivQLearningVar/1862_186_2	centralized	False	0	False	GridWorld	SUNY	FullObsDiscrete	Individual_Q	0.2	0.2	1000000	2
IndivQLearningVar/1863_186_3	centralized	False	0	False	GridWorld	SUNY	FullObsDiscrete	Individual_Q	0.2	0.2	1000000	3
IndivQLearningVar/1864_186_4	centralized	False	0	False	GridWorld	SUNY	FullObsDiscrete	Individual_Q	0.2	0.2	1000000	4
IndivQLearningVar/1865_186_5	centralized	False	0	False	GridWorld	SUNY	FullObsDiscrete	Individual_Q	0.2	0.2	1000000	5
IndivQLearningVar/1866_186_6	centralized	False	0	False	GridWorld	SUNY	FullObsDiscrete	Individual_Q	0.2	0.2	1000000	6
IndivQLearningVar/1867_186_7	centralized	False	0	False	GridWorld	SUNY	FullObsDiscrete	Individual_Q	0.2	0.2	1000000	7
IndivQLearningVar/1868_186_8	centralized	False	0	False	GridWorld	SUNY	FullObsDiscrete	Individual_Q	0.2	0.2	1000000	8
IndivQLearningVar/1869_186_9	centralized	False	0	False	GridWorld	SUNY	FullObsDiscrete	Individual_Q	0.2	0.2	1000000	9
IndivQLearningVar/1870_187_0	centralized	True	-10	False	GridWorld	SUNY	FullObsDiscrete	Individual_Q	0.2	0.2	1000000	0
IndivQLearningVar/1871_187_1	centralized	True	-10	False	GridWorld	SUNY	FullObsDiscrete	Individual_Q	0.2	0.2	1000000	1
IndivQLearningVar/1872_187_2	centralized	True	-10	False	GridWorld	SUNY	FullObsDiscrete	Individual_Q	0.2	0.2	1000000	2
IndivQLearningVar/1873_187_3	centralized	True	-10	False	GridWorld	SUNY	FullObsDiscrete	Individual_Q	0.2	0.2	1000000	3
IndivQLearningVar/1874_187_4	centralized	True	-10	False	GridWorld	SUNY	FullObsDiscrete	Individual_Q	0.2	0.2	1000000	4
IndivQLearningVar/1875_187_5	centralized	True	-10	False	GridWorld	SUNY	FullObsDiscrete	Individual_Q	0.2	0.2	1000000	5
IndivQLearningVar/1876_187_6	centralized	True	-10	False	GridWorld	SUNY	FullObsDiscrete	Individual_Q	0.2	0.2	1000000	6
IndivQLearningVar/1877_187_7	centralized	True	-10	False	GridWorld	SUNY	FullObsDiscrete	Individual_Q	0.2	0.2	1000000	7
IndivQLearningVar/1878_187_8	centralized	True	-10	False	GridWorld	SUNY	FullObsDiscrete	Individual_Q	0.2	0.2	1000000	8
IndivQLearningVar/1879_187_9	centralized	True	-10	False	GridWorld	SUNY	FullObsDiscrete	Individual_Q	0.2	0.2	1000000	9
IndivQLearningVar/1880_188_0	centralized	True	-100	False	GridWorld	SUNY	FullObsDiscrete	Individual_Q	0.2	0.2	1000000	0
IndivQLearningVar/1881_188_1	centralized	True	-100	False	GridWorld	SUNY	FullObsDiscrete	Individual_Q	0.2	0.2	1000000	1
IndivQLearningVar/1882_188_2	centralized	True	-100	False	GridWorld	SUNY	FullObsDiscrete	Individual_Q	0.2	0.2	1000000	2
IndivQLearningVar/1883_188_3	centralized	True	-100	False	GridWorld	SUNY	FullObsDiscrete	Individual_Q	0.2	0.2	1000000	3
IndivQLearningVar/1884_188_4	centralized	True	-100	False	GridWorld	SUNY	FullObsDiscrete	Individual_Q	0.2	0.2	1000000	4
IndivQLearningVar/1885_188_5	centralized	True	-100	False	GridWorld	SUNY	FullObsDiscrete	Individual_Q	0.2	0.2	1000000	5
IndivQLearningVar/1886_188_6	centralized	True	-100	False	GridWorld	SUNY	FullObsDiscrete	Individual_Q	0.2	0.2	1000000	6
IndivQLearningVar/1887_188_7	centralized	True	-100	False	GridWorld	SUNY	FullObsDiscrete	Individual_Q	0.2	0.2	1000000	7
IndivQLearningVar/1888_188_8	centralized	True	-100	False	GridWorld	SUNY	FullObsDiscrete	Individual_Q	0.2	0.2	1000000	8
IndivQLearningVar/1889_188_9	centralized	True	-100	False	GridWorld	SUNY	FullObsDiscrete	Individual_Q	0.2	0.2	1000000	9
IndivQLearningVar/1890_189_0	centralized	False	0	False	GridWorld	SUNY	FullObsDiscrete	Individual_Q	0.2	0.01	1000000	0
IndivQLearningVar/1891_189_1	centralized	False	0	False	GridWorld	SUNY	FullObsDiscrete	Individual_Q	0.2	0.01	1000000	1
IndivQLearningVar/1892_189_2	centralized	False	0	False	GridWorld	SUNY	FullObsDiscrete	Individual_Q	0.2	0.01	1000000	2
IndivQLearningVar/1893_189_3	centralized	False	0	False	GridWorld	SUNY	FullObsDiscrete	Individual_Q	0.2	0.01	1000000	3
IndivQLearningVar/1894_189_4	centralized	False	0	False	GridWorld	SUNY	FullObsDiscrete	Individual_Q	0.2	0.01	1000000	4
IndivQLearningVar/1895_189_5	centralized	False	0	False	GridWorld	SUNY	FullObsDiscrete	Individual_Q	0.2	0.01	1000000	5
IndivQLearningVar/1896_189_6	centralized	False	0	False	GridWorld	SUNY	FullObsDiscrete	Individual_Q	0.2	0.01	1000000	6
IndivQLearningVar/1897_189_7	centralized	False	0	False	GridWorld	SUNY	FullObsDiscrete	Individual_Q	0.2	0.01	1000000	7
IndivQLearningVar/1898_189_8	centralized	False	0	False	GridWorld	SUNY	FullObsDiscrete	Individual_Q	0.2	0.01	1000000	8
IndivQLearningVar/1899_189_9	centralized	False	0	False	GridWorld	SUNY	FullObsDiscrete	Individual_Q	0.2	0.01	1000000	9
IndivQLearningVar/1900_190_0	centralized	True	-10	False	GridWorld	SUNY	FullObsDiscrete	Individual_Q	0.2	0.01	1000000	0
IndivQLearningVar/1901_190_1	centralized	True	-10	False	GridWorld	SUNY	FullObsDiscrete	Individual_Q	0.2	0.01	1000000	1
IndivQLearningVar/1902_190_2	centralized	True	-10	False	GridWorld	SUNY	FullObsDiscrete	Individual_Q	0.2	0.01	1000000	2
IndivQLearningVar/1903_190_3	centralized	True	-10	False	GridWorld	SUNY	FullObsDiscrete	Individual_Q	0.2	0.01	1000000	3
IndivQLearningVar/1904_190_4	centralized	True	-10	False	GridWorld	SUNY	FullObsDiscrete	Individual_Q	0.2	0.01	1000000	4
IndivQLearningVar/1905_190_5	centralized	True	-10	False	GridWorld	SUNY	FullObsDiscrete	Individual_Q	0.2	0.01	1000000	5
IndivQLearningVar/1906_190_6	centralized	True	-10	False	GridWorld	SUNY	FullObsDiscrete	Individual_Q	0.2	0.01	1000000	6
IndivQLearningVar/1907_190_7	centralized	True	-10	False	GridWorld	SUNY	FullObsDiscrete	Individual_Q	0.2	0.01	1000000	7
IndivQLearningVar/1908_190_8	centralized	True	-10	False	GridWorld	SUNY	FullObsDiscrete	Individual_Q	0.2	0.01	1000000	8
IndivQLearningVar/1909_190_9	centralized	True	-10	False	GridWorld	SUNY	FullObsDiscrete	Individual_Q	0.2	0.01	1000000	9
IndivQLearningVar/1910_191_0	centralized	True	-100	False	GridWorld	SUNY	FullObsDiscrete	Individual_Q	0.2	0.01	1000000	0
IndivQLearningVar/1911_191_1	centralized	True	-100	False	GridWorld	SUNY	FullObsDiscrete	Individual_Q	0.2	0.01	1000000	1
IndivQLearningVar/1912_191_2	centralized	True	-100	False	GridWorld	SUNY	FullObsDiscrete	Individual_Q	0.2	0.01	1000000	2
IndivQLearningVar/1913_191_3	centralized	True	-100	False	GridWorld	SUNY	FullObsDiscrete	Individual_Q	0.2	0.01	1000000	3
IndivQLearningVar/1914_191_4	centralized	True	-100	False	GridWorld	SUNY	FullObsDiscrete	Individual_Q	0.2	0.01	1000000	4
IndivQLearningVar/1915_191_5	centralized	True	-100	False	GridWorld	SUNY	FullObsDiscrete	Individual_Q	0.2	0.01	1000000	5
IndivQLearningVar/1916_191_6	centralized	True	-100	False	GridWorld	SUNY	FullObsDiscrete	Individual_Q	0.2	0.01	1000000	6
IndivQLearningVar/1917_191_7	centralized	True	-100	False	GridWorld	SUNY	FullObsDiscrete	Individual_Q	0.2	0.01	1000000	7
IndivQLearningVar/1918_191_8	centralized	True	-100	False	GridWorld	SUNY	FullObsDiscrete	Individual_Q	0.2	0.01	1000000	8
IndivQLearningVar/1919_191_9	centralized	True	-100	False	GridWorld	SUNY	FullObsDiscrete	Individual_Q	0.2	0.01	1000000	9
IndivQLearningVar/1920_192_0	decentralized	False	0	False	GridWorld	SUNY	PartialObsDiscrete	Individual_Q	0.2	0.2	1000000	0
IndivQLearningVar/1921_192_1	decentralized	False	0	False	GridWorld	SUNY	PartialObsDiscrete	Individual_Q	0.2	0.2	1000000	1
IndivQLearningVar/1922_192_2	decentralized	False	0	False	GridWorld	SUNY	PartialObsDiscrete	Individual_Q	0.2	0.2	1000000	2
IndivQLearningVar/1923_192_3	decentralized	False	0	False	GridWorld	SUNY	PartialObsDiscrete	Individual_Q	0.2	0.2	1000000	3
IndivQLearningVar/1924_192_4	decentralized	False	0	False	GridWorld	SUNY	PartialObsDiscrete	Individual_Q	0.2	0.2	1000000	4
IndivQLearningVar/1925_192_5	decentralized	False	0	False	GridWorld	SUNY	PartialObsDiscrete	Individual_Q	0.2	0.2	1000000	5
IndivQLearningVar/1926_192_6	decentralized	False	0	False	GridWorld	SUNY	PartialObsDiscrete	Individual_Q	0.2	0.2	1000000	6
IndivQLearningVar/1927_192_7	decentralized	False	0	False	GridWorld	SUNY	PartialObsDiscrete	Individual_Q	0.2	0.2	1000000	7
IndivQLearningVar/1928_192_8	decentralized	False	0	False	GridWorld	SUNY	PartialObsDiscrete	Individual_Q	0.2	0.2	1000000	8
IndivQLearningVar/1929_192_9	decentralized	False	0	False	GridWorld	SUNY	PartialObsDiscrete	Individual_Q	0.2	0.2	1000000	9
IndivQLearningVar/1930_193_0	decentralized	True	-10	False	GridWorld	SUNY	PartialObsDiscrete	Individual_Q	0.2	0.2	1000000	0
IndivQLearningVar/1931_193_1	decentralized	True	-10	False	GridWorld	SUNY	PartialObsDiscrete	Individual_Q	0.2	0.2	1000000	1
IndivQLearningVar/1932_193_2	decentralized	True	-10	False	GridWorld	SUNY	PartialObsDiscrete	Individual_Q	0.2	0.2	1000000	2
IndivQLearningVar/1933_193_3	decentralized	True	-10	False	GridWorld	SUNY	PartialObsDiscrete	Individual_Q	0.2	0.2	1000000	3
IndivQLearningVar/1934_193_4	decentralized	True	-10	False	GridWorld	SUNY	PartialObsDiscrete	Individual_Q	0.2	0.2	1000000	4
IndivQLearningVar/1935_193_5	decentralized	True	-10	False	GridWorld	SUNY	PartialObsDiscrete	Individual_Q	0.2	0.2	1000000	5
IndivQLearningVar/1936_193_6	decentralized	True	-10	False	GridWorld	SUNY	PartialObsDiscrete	Individual_Q	0.2	0.2	1000000	6
IndivQLearningVar/1937_193_7	decentralized	True	-10	False	GridWorld	SUNY	PartialObsDiscrete	Individual_Q	0.2	0.2	1000000	7
IndivQLearningVar/1938_193_8	decentralized	True	-10	False	GridWorld	SUNY	PartialObsDiscrete	Individual_Q	0.2	0.2	1000000	8
IndivQLearningVar/1939_193_9	decentralized	True	-10	False	GridWorld	SUNY	PartialObsDiscrete	Individual_Q	0.2	0.2	1000000	9
IndivQLearningVar/1940_194_0	decentralized	True	-100	False	GridWorld	SUNY	PartialObsDiscrete	Individual_Q	0.2	0.2	1000000	0
IndivQLearningVar/1941_194_1	decentralized	True	-100	False	GridWorld	SUNY	PartialObsDiscrete	Individual_Q	0.2	0.2	1000000	1
IndivQLearningVar/1942_194_2	decentralized	True	-100	False	GridWorld	SUNY	PartialObsDiscrete	Individual_Q	0.2	0.2	1000000	2
IndivQLearningVar/1943_194_3	decentralized	True	-100	False	GridWorld	SUNY	PartialObsDiscrete	Individual_Q	0.2	0.2	1000000	3
IndivQLearningVar/1944_194_4	decentralized	True	-100	False	GridWorld	SUNY	PartialObsDiscrete	Individual_Q	0.2	0.2	1000000	4
IndivQLearningVar/1945_194_5	decentralized	True	-100	False	GridWorld	SUNY	PartialObsDiscrete	Individual_Q	0.2	0.2	1000000	5
IndivQLearningVar/1946_194_6	decentralized	True	-100	False	GridWorld	SUNY	PartialObsDiscrete	Individual_Q	0.2	0.2	1000000	6
IndivQLearningVar/1947_194_7	decentralized	True	-100	False	GridWorld	SUNY	PartialObsDiscrete	Individual_Q	0.2	0.2	1000000	7
IndivQLearningVar/1948_194_8	decentralized	True	-100	False	GridWorld	SUNY	PartialObsDiscrete	Individual_Q	0.2	0.2	1000000	8
IndivQLearningVar/1949_194_9	decentralized	True	-100	False	GridWorld	SUNY	PartialObsDiscrete	Individual_Q	0.2	0.2	1000000	9
IndivQLearningVar/1950_195_0	decentralized	False	0	False	GridWorld	SUNY	PartialObsDiscrete	Individual_Q	0.2	0.01	1000000	0
IndivQLearningVar/1951_195_1	decentralized	False	0	False	GridWorld	SUNY	PartialObsDiscrete	Individual_Q	0.2	0.01	1000000	1
IndivQLearningVar/1952_195_2	decentralized	False	0	False	GridWorld	SUNY	PartialObsDiscrete	Individual_Q	0.2	0.01	1000000	2
IndivQLearningVar/1953_195_3	decentralized	False	0	False	GridWorld	SUNY	PartialObsDiscrete	Individual_Q	0.2	0.01	1000000	3
IndivQLearningVar/1954_195_4	decentralized	False	0	False	GridWorld	SUNY	PartialObsDiscrete	Individual_Q	0.2	0.01	1000000	4
IndivQLearningVar/1955_195_5	decentralized	False	0	False	GridWorld	SUNY	PartialObsDiscrete	Individual_Q	0.2	0.01	1000000	5
IndivQLearningVar/1956_195_6	decentralized	False	0	False	GridWorld	SUNY	PartialObsDiscrete	Individual_Q	0.2	0.01	1000000	6
IndivQLearningVar/1957_195_7	decentralized	False	0	False	GridWorld	SUNY	PartialObsDiscrete	Individual_Q	0.2	0.01	1000000	7
IndivQLearningVar/1958_195_8	decentralized	False	0	False	GridWorld	SUNY	PartialObsDiscrete	Individual_Q	0.2	0.01	1000000	8
IndivQLearningVar/1959_195_9	decentralized	False	0	False	GridWorld	SUNY	PartialObsDiscrete	Individual_Q	0.2	0.01	1000000	9
IndivQLearningVar/1960_196_0	decentralized	True	-10	False	GridWorld	SUNY	PartialObsDiscrete	Individual_Q	0.2	0.01	1000000	0
IndivQLearningVar/1961_196_1	decentralized	True	-10	False	GridWorld	SUNY	PartialObsDiscrete	Individual_Q	0.2	0.01	1000000	1
IndivQLearningVar/1962_196_2	decentralized	True	-10	False	GridWorld	SUNY	PartialObsDiscrete	Individual_Q	0.2	0.01	1000000	2
IndivQLearningVar/1963_196_3	decentralized	True	-10	False	GridWorld	SUNY	PartialObsDiscrete	Individual_Q	0.2	0.01	1000000	3
IndivQLearningVar/1964_196_4	decentralized	True	-10	False	GridWorld	SUNY	PartialObsDiscrete	Individual_Q	0.2	0.01	1000000	4
IndivQLearningVar/1965_196_5	decentralized	True	-10	False	GridWorld	SUNY	PartialObsDiscrete	Individual_Q	0.2	0.01	1000000	5
IndivQLearningVar/1966_196_6	decentralized	True	-10	False	GridWorld	SUNY	PartialObsDiscrete	Individual_Q	0.2	0.01	1000000	6
IndivQLearningVar/1967_196_7	decentralized	True	-10	False	GridWorld	SUNY	PartialObsDiscrete	Individual_Q	0.2	0.01	1000000	7
IndivQLearningVar/1968_196_8	decentralized	True	-10	False	GridWorld	SUNY	PartialObsDiscrete	Individual_Q	0.2	0.01	1000000	8
IndivQLearningVar/1969_196_9	decentralized	True	-10	False	GridWorld	SUNY	PartialObsDiscrete	Individual_Q	0.2	0.01	1000000	9
IndivQLearningVar/1970_197_0	decentralized	True	-100	False	GridWorld	SUNY	PartialObsDiscrete	Individual_Q	0.2	0.01	1000000	0
IndivQLearningVar/1971_197_1	decentralized	True	-100	False	GridWorld	SUNY	PartialObsDiscrete	Individual_Q	0.2	0.01	1000000	1
IndivQLearningVar/1972_197_2	decentralized	True	-100	False	GridWorld	SUNY	PartialObsDiscrete	Individual_Q	0.2	0.01	1000000	2
IndivQLearningVar/1973_197_3	decentralized	True	-100	False	GridWorld	SUNY	PartialObsDiscrete	Individual_Q	0.2	0.01	1000000	3
IndivQLearningVar/1974_197_4	decentralized	True	-100	False	GridWorld	SUNY	PartialObsDiscrete	Individual_Q	0.2	0.01	1000000	4
IndivQLearningVar/1975_197_5	decentralized	True	-100	False	GridWorld	SUNY	PartialObsDiscrete	Individual_Q	0.2	0.01	1000000	5
IndivQLearningVar/1976_197_6	decentralized	True	-100	False	GridWorld	SUNY	PartialObsDiscrete	Individual_Q	0.2	0.01	1000000	6
IndivQLearningVar/1977_197_7	decentralized	True	-100	False	GridWorld	SUNY	PartialObsDiscrete	Individual_Q	0.2	0.01	1000000	7
IndivQLearningVar/1978_197_8	decentralized	True	-100	False	GridWorld	SUNY	PartialObsDiscrete	Individual_Q	0.2	0.01	1000000	8
IndivQLearningVar/1979_197_9	decentralized	True	-100	False	GridWorld	SUNY	PartialObsDiscrete	Individual_Q	0.2	0.01	1000000	9
IndivQLearningVar/1980_198_0	decentralized	False	0	False	GridWorld	SUNY	FullObsDiscrete	Individual_Q	0.2	0.2	1000000	0
IndivQLearningVar/1981_198_1	decentralized	False	0	False	GridWorld	SUNY	FullObsDiscrete	Individual_Q	0.2	0.2	1000000	1
IndivQLearningVar/1982_198_2	decentralized	False	0	False	GridWorld	SUNY	FullObsDiscrete	Individual_Q	0.2	0.2	1000000	2
IndivQLearningVar/1983_198_3	decentralized	False	0	False	GridWorld	SUNY	FullObsDiscrete	Individual_Q	0.2	0.2	1000000	3
IndivQLearningVar/1984_198_4	decentralized	False	0	False	GridWorld	SUNY	FullObsDiscrete	Individual_Q	0.2	0.2	1000000	4
IndivQLearningVar/1985_198_5	decentralized	False	0	False	GridWorld	SUNY	FullObsDiscrete	Individual_Q	0.2	0.2	1000000	5
IndivQLearningVar/1986_198_6	decentralized	False	0	False	GridWorld	SUNY	FullObsDiscrete	Individual_Q	0.2	0.2	1000000	6
IndivQLearningVar/1987_198_7	decentralized	False	0	False	GridWorld	SUNY	FullObsDiscrete	Individual_Q	0.2	0.2	1000000	7
IndivQLearningVar/1988_198_8	decentralized	False	0	False	GridWorld	SUNY	FullObsDiscrete	Individual_Q	0.2	0.2	1000000	8
IndivQLearningVar/1989_198_9	decentralized	False	0	False	GridWorld	SUNY	FullObsDiscrete	Individual_Q	0.2	0.2	1000000	9
IndivQLearningVar/1990_199_0	decentralized	True	-10	False	GridWorld	SUNY	FullObsDiscrete	Individual_Q	0.2	0.2	1000000	0
IndivQLearningVar/1991_199_1	decentralized	True	-10	False	GridWorld	SUNY	FullObsDiscrete	Individual_Q	0.2	0.2	1000000	1
IndivQLearningVar/1992_199_2	decentralized	True	-10	False	GridWorld	SUNY	FullObsDiscrete	Individual_Q	0.2	0.2	1000000	2
IndivQLearningVar/1993_199_3	decentralized	True	-10	False	GridWorld	SUNY	FullObsDiscrete	Individual_Q	0.2	0.2	1000000	3
IndivQLearningVar/1994_199_4	decentralized	True	-10	False	GridWorld	SUNY	FullObsDiscrete	Individual_Q	0.2	0.2	1000000	4
IndivQLearningVar/1995_199_5	decentralized	True	-10	False	GridWorld	SUNY	FullObsDiscrete	Individual_Q	0.2	0.2	1000000	5
IndivQLearningVar/1996_199_6	decentralized	True	-10	False	GridWorld	SUNY	FullObsDiscrete	Individual_Q	0.2	0.2	1000000	6
IndivQLearningVar/1997_199_7	decentralized	True	-10	False	GridWorld	SUNY	FullObsDiscrete	Individual_Q	0.2	0.2	1000000	7
IndivQLearningVar/1998_199_8	decentralized	True	-10	False	GridWorld	SUNY	FullObsDiscrete	Individual_Q	0.2	0.2	1000000	8
[truncated: 881 more rows]
