# Supplementary material
Source: ML conference proceedings conference paper supplement (https://proceedings.neurips.cc/paper_files/paper/2022/hash/57444e14ecd9e2c8f603b4f012ce3811-Abstract.html)
Supplement: Supplementary file 1 [file 57444e14ecd9e2c8f603b4f012ce3811-Supplemental-Conference.zip › 3410_shield_decentralization_for_sa-Supplementary Material/parallel_configs/IndivQLearningVar2.csv]

run_name	shield	punish_unsafe_orig_action	punish_unsafe_orig_action_modifier	randomize_starts	map_type	grid_world_map_name	grid_world_obs_type	learner_type	learner_anneal_eps_start	learner_anneal_eps_finish	max_total_steps	seed
IndivQLearningVar2/0_0_0	centralized	False	0	True	GridWorld	Pentagon	PartialObsDiscrete	Individual_Q	0.2	0.2	1000000	0
IndivQLearningVar2/1_0_1	centralized	False	0	True	GridWorld	Pentagon	PartialObsDiscrete	Individual_Q	0.2	0.2	1000000	1
IndivQLearningVar2/2_0_2	centralized	False	0	True	GridWorld	Pentagon	PartialObsDiscrete	Individual_Q	0.2	0.2	1000000	2
IndivQLearningVar2/3_0_3	centralized	False	0	True	GridWorld	Pentagon	PartialObsDiscrete	Individual_Q	0.2	0.2	1000000	3
IndivQLearningVar2/4_0_4	centralized	False	0	True	GridWorld	Pentagon	PartialObsDiscrete	Individual_Q	0.2	0.2	1000000	4
IndivQLearningVar2/5_0_5	centralized	False	0	True	GridWorld	Pentagon	PartialObsDiscrete	Individual_Q	0.2	0.2	1000000	5
IndivQLearningVar2/6_0_6	centralized	False	0	True	GridWorld	Pentagon	PartialObsDiscrete	Individual_Q	0.2	0.2	1000000	6
IndivQLearningVar2/7_0_7	centralized	False	0	True	GridWorld	Pentagon	PartialObsDiscrete	Individual_Q	0.2	0.2	1000000	7
IndivQLearningVar2/8_0_8	centralized	False	0	True	GridWorld	Pentagon	PartialObsDiscrete	Individual_Q	0.2	0.2	1000000	8
IndivQLearningVar2/9_0_9	centralized	False	0	True	GridWorld	Pentagon	PartialObsDiscrete	Individual_Q	0.2	0.2	1000000	9
IndivQLearningVar2/10_1_0	centralized	True	-10	True	GridWorld	Pentagon	PartialObsDiscrete	Individual_Q	0.2	0.2	1000000	0
IndivQLearningVar2/11_1_1	centralized	True	-10	True	GridWorld	Pentagon	PartialObsDiscrete	Individual_Q	0.2	0.2	1000000	1
IndivQLearningVar2/12_1_2	centralized	True	-10	True	GridWorld	Pentagon	PartialObsDiscrete	Individual_Q	0.2	0.2	1000000	2
IndivQLearningVar2/13_1_3	centralized	True	-10	True	GridWorld	Pentagon	PartialObsDiscrete	Individual_Q	0.2	0.2	1000000	3
IndivQLearningVar2/14_1_4	centralized	True	-10	True	GridWorld	Pentagon	PartialObsDiscrete	Individual_Q	0.2	0.2	1000000	4
IndivQLearningVar2/15_1_5	centralized	True	-10	True	GridWorld	Pentagon	PartialObsDiscrete	Individual_Q	0.2	0.2	1000000	5
IndivQLearningVar2/16_1_6	centralized	True	-10	True	GridWorld	Pentagon	PartialObsDiscrete	Individual_Q	0.2	0.2	1000000	6
IndivQLearningVar2/17_1_7	centralized	True	-10	True	GridWorld	Pentagon	PartialObsDiscrete	Individual_Q	0.2	0.2	1000000	7
IndivQLearningVar2/18_1_8	centralized	True	-10	True	GridWorld	Pentagon	PartialObsDiscrete	Individual_Q	0.2	0.2	1000000	8
IndivQLearningVar2/19_1_9	centralized	True	-10	True	GridWorld	Pentagon	PartialObsDiscrete	Individual_Q	0.2	0.2	1000000	9
IndivQLearningVar2/20_2_0	centralized	False	0	True	GridWorld	Pentagon	PartialObsDiscrete	Individual_Q	0.2	0.01	1000000	0
IndivQLearningVar2/21_2_1	centralized	False	0	True	GridWorld	Pentagon	PartialObsDiscrete	Individual_Q	0.2	0.01	1000000	1
IndivQLearningVar2/22_2_2	centralized	False	0	True	GridWorld	Pentagon	PartialObsDiscrete	Individual_Q	0.2	0.01	1000000	2
IndivQLearningVar2/23_2_3	centralized	False	0	True	GridWorld	Pentagon	PartialObsDiscrete	Individual_Q	0.2	0.01	1000000	3
IndivQLearningVar2/24_2_4	centralized	False	0	True	GridWorld	Pentagon	PartialObsDiscrete	Individual_Q	0.2	0.01	1000000	4
IndivQLearningVar2/25_2_5	centralized	False	0	True	GridWorld	Pentagon	PartialObsDiscrete	Individual_Q	0.2	0.01	1000000	5
IndivQLearningVar2/26_2_6	centralized	False	0	True	GridWorld	Pentagon	PartialObsDiscrete	Individual_Q	0.2	0.01	1000000	6
IndivQLearningVar2/27_2_7	centralized	False	0	True	GridWorld	Pentagon	PartialObsDiscrete	Individual_Q	0.2	0.01	1000000	7
IndivQLearningVar2/28_2_8	centralized	False	0	True	GridWorld	Pentagon	PartialObsDiscrete	Individual_Q	0.2	0.01	1000000	8
IndivQLearningVar2/29_2_9	centralized	False	0	True	GridWorld	Pentagon	PartialObsDiscrete	Individual_Q	0.2	0.01	1000000	9
IndivQLearningVar2/30_3_0	centralized	True	-10	True	GridWorld	Pentagon	PartialObsDiscrete	Individual_Q	0.2	0.01	1000000	0
IndivQLearningVar2/31_3_1	centralized	True	-10	True	GridWorld	Pentagon	PartialObsDiscrete	Individual_Q	0.2	0.01	1000000	1
IndivQLearningVar2/32_3_2	centralized	True	-10	True	GridWorld	Pentagon	PartialObsDiscrete	Individual_Q	0.2	0.01	1000000	2
IndivQLearningVar2/33_3_3	centralized	True	-10	True	GridWorld	Pentagon	PartialObsDiscrete	Individual_Q	0.2	0.01	1000000	3
IndivQLearningVar2/34_3_4	centralized	True	-10	True	GridWorld	Pentagon	PartialObsDiscrete	Individual_Q	0.2	0.01	1000000	4
IndivQLearningVar2/35_3_5	centralized	True	-10	True	GridWorld	Pentagon	PartialObsDiscrete	Individual_Q	0.2	0.01	1000000	5
IndivQLearningVar2/36_3_6	centralized	True	-10	True	GridWorld	Pentagon	PartialObsDiscrete	Individual_Q	0.2	0.01	1000000	6
IndivQLearningVar2/37_3_7	centralized	True	-10	True	GridWorld	Pentagon	PartialObsDiscrete	Individual_Q	0.2	0.01	1000000	7
IndivQLearningVar2/38_3_8	centralized	True	-10	True	GridWorld	Pentagon	PartialObsDiscrete	Individual_Q	0.2	0.01	1000000	8
IndivQLearningVar2/39_3_9	centralized	True	-10	True	GridWorld	Pentagon	PartialObsDiscrete	Individual_Q	0.2	0.01	1000000	9
IndivQLearningVar2/40_4_0	centralized	False	0	True	GridWorld	Pentagon	FullObsDiscrete	Individual_Q	0.2	0.2	1000000	0
IndivQLearningVar2/41_4_1	centralized	False	0	True	GridWorld	Pentagon	FullObsDiscrete	Individual_Q	0.2	0.2	1000000	1
IndivQLearningVar2/42_4_2	centralized	False	0	True	GridWorld	Pentagon	FullObsDiscrete	Individual_Q	0.2	0.2	1000000	2
IndivQLearningVar2/43_4_3	centralized	False	0	True	GridWorld	Pentagon	FullObsDiscrete	Individual_Q	0.2	0.2	1000000	3
IndivQLearningVar2/44_4_4	centralized	False	0	True	GridWorld	Pentagon	FullObsDiscrete	Individual_Q	0.2	0.2	1000000	4
IndivQLearningVar2/45_4_5	centralized	False	0	True	GridWorld	Pentagon	FullObsDiscrete	Individual_Q	0.2	0.2	1000000	5
IndivQLearningVar2/46_4_6	centralized	False	0	True	GridWorld	Pentagon	FullObsDiscrete	Individual_Q	0.2	0.2	1000000	6
IndivQLearningVar2/47_4_7	centralized	False	0	True	GridWorld	Pentagon	FullObsDiscrete	Individual_Q	0.2	0.2	1000000	7
IndivQLearningVar2/48_4_8	centralized	False	0	True	GridWorld	Pentagon	FullObsDiscrete	Individual_Q	0.2	0.2	1000000	8
IndivQLearningVar2/49_4_9	centralized	False	0	True	GridWorld	Pentagon	FullObsDiscrete	Individual_Q	0.2	0.2	1000000	9
IndivQLearningVar2/50_5_0	centralized	True	-10	True	GridWorld	Pentagon	FullObsDiscrete	Individual_Q	0.2	0.2	1000000	0
IndivQLearningVar2/51_5_1	centralized	True	-10	True	GridWorld	Pentagon	FullObsDiscrete	Individual_Q	0.2	0.2	1000000	1
IndivQLearningVar2/52_5_2	centralized	True	-10	True	GridWorld	Pentagon	FullObsDiscrete	Individual_Q	0.2	0.2	1000000	2
IndivQLearningVar2/53_5_3	centralized	True	-10	True	GridWorld	Pentagon	FullObsDiscrete	Individual_Q	0.2	0.2	1000000	3
IndivQLearningVar2/54_5_4	centralized	True	-10	True	GridWorld	Pentagon	FullObsDiscrete	Individual_Q	0.2	0.2	1000000	4
IndivQLearningVar2/55_5_5	centralized	True	-10	True	GridWorld	Pentagon	FullObsDiscrete	Individual_Q	0.2	0.2	1000000	5
IndivQLearningVar2/56_5_6	centralized	True	-10	True	GridWorld	Pentagon	FullObsDiscrete	Individual_Q	0.2	0.2	1000000	6
IndivQLearningVar2/57_5_7	centralized	True	-10	True	GridWorld	Pentagon	FullObsDiscrete	Individual_Q	0.2	0.2	1000000	7
IndivQLearningVar2/58_5_8	centralized	True	-10	True	GridWorld	Pentagon	FullObsDiscrete	Individual_Q	0.2	0.2	1000000	8
IndivQLearningVar2/59_5_9	centralized	True	-10	True	GridWorld	Pentagon	FullObsDiscrete	Individual_Q	0.2	0.2	1000000	9
IndivQLearningVar2/60_6_0	centralized	False	0	True	GridWorld	Pentagon	FullObsDiscrete	Individual_Q	0.2	0.01	1000000	0
IndivQLearningVar2/61_6_1	centralized	False	0	True	GridWorld	Pentagon	FullObsDiscrete	Individual_Q	0.2	0.01	1000000	1
IndivQLearningVar2/62_6_2	centralized	False	0	True	GridWorld	Pentagon	FullObsDiscrete	Individual_Q	0.2	0.01	1000000	2
IndivQLearningVar2/63_6_3	centralized	False	0	True	GridWorld	Pentagon	FullObsDiscrete	Individual_Q	0.2	0.01	1000000	3
IndivQLearningVar2/64_6_4	centralized	False	0	True	GridWorld	Pentagon	FullObsDiscrete	Individual_Q	0.2	0.01	1000000	4
IndivQLearningVar2/65_6_5	centralized	False	0	True	GridWorld	Pentagon	FullObsDiscrete	Individual_Q	0.2	0.01	1000000	5
IndivQLearningVar2/66_6_6	centralized	False	0	True	GridWorld	Pentagon	FullObsDiscrete	Individual_Q	0.2	0.01	1000000	6
IndivQLearningVar2/67_6_7	centralized	False	0	True	GridWorld	Pentagon	FullObsDiscrete	Individual_Q	0.2	0.01	1000000	7
IndivQLearningVar2/68_6_8	centralized	False	0	True	GridWorld	Pentagon	FullObsDiscrete	Individual_Q	0.2	0.01	1000000	8
IndivQLearningVar2/69_6_9	centralized	False	0	True	GridWorld	Pentagon	FullObsDiscrete	Individual_Q	0.2	0.01	1000000	9
IndivQLearningVar2/70_7_0	centralized	True	-10	True	GridWorld	Pentagon	FullObsDiscrete	Individual_Q	0.2	0.01	1000000	0
IndivQLearningVar2/71_7_1	centralized	True	-10	True	GridWorld	Pentagon	FullObsDiscrete	Individual_Q	0.2	0.01	1000000	1
IndivQLearningVar2/72_7_2	centralized	True	-10	True	GridWorld	Pentagon	FullObsDiscrete	Individual_Q	0.2	0.01	1000000	2
IndivQLearningVar2/73_7_3	centralized	True	-10	True	GridWorld	Pentagon	FullObsDiscrete	Individual_Q	0.2	0.01	1000000	3
IndivQLearningVar2/74_7_4	centralized	True	-10	True	GridWorld	Pentagon	FullObsDiscrete	Individual_Q	0.2	0.01	1000000	4
IndivQLearningVar2/75_7_5	centralized	True	-10	True	GridWorld	Pentagon	FullObsDiscrete	Individual_Q	0.2	0.01	1000000	5
IndivQLearningVar2/76_7_6	centralized	True	-10	True	GridWorld	Pentagon	FullObsDiscrete	Individual_Q	0.2	0.01	1000000	6
IndivQLearningVar2/77_7_7	centralized	True	-10	True	GridWorld	Pentagon	FullObsDiscrete	Individual_Q	0.2	0.01	1000000	7
IndivQLearningVar2/78_7_8	centralized	True	-10	True	GridWorld	Pentagon	FullObsDiscrete	Individual_Q	0.2	0.01	1000000	8
IndivQLearningVar2/79_7_9	centralized	True	-10	True	GridWorld	Pentagon	FullObsDiscrete	Individual_Q	0.2	0.01	1000000	9
IndivQLearningVar2/80_8_0	decentralized	False	0	True	GridWorld	Pentagon	PartialObsDiscrete	Individual_Q	0.2	0.2	1000000	0
IndivQLearningVar2/81_8_1	decentralized	False	0	True	GridWorld	Pentagon	PartialObsDiscrete	Individual_Q	0.2	0.2	1000000	1
IndivQLearningVar2/82_8_2	decentralized	False	0	True	GridWorld	Pentagon	PartialObsDiscrete	Individual_Q	0.2	0.2	1000000	2
IndivQLearningVar2/83_8_3	decentralized	False	0	True	GridWorld	Pentagon	PartialObsDiscrete	Individual_Q	0.2	0.2	1000000	3
IndivQLearningVar2/84_8_4	decentralized	False	0	True	GridWorld	Pentagon	PartialObsDiscrete	Individual_Q	0.2	0.2	1000000	4
IndivQLearningVar2/85_8_5	decentralized	False	0	True	GridWorld	Pentagon	PartialObsDiscrete	Individual_Q	0.2	0.2	1000000	5
IndivQLearningVar2/86_8_6	decentralized	False	0	True	GridWorld	Pentagon	PartialObsDiscrete	Individual_Q	0.2	0.2	1000000	6
IndivQLearningVar2/87_8_7	decentralized	False	0	True	GridWorld	Pentagon	PartialObsDiscrete	Individual_Q	0.2	0.2	1000000	7
IndivQLearningVar2/88_8_8	decentralized	False	0	True	GridWorld	Pentagon	PartialObsDiscrete	Individual_Q	0.2	0.2	1000000	8
IndivQLearningVar2/89_8_9	decentralized	False	0	True	GridWorld	Pentagon	PartialObsDiscrete	Individual_Q	0.2	0.2	1000000	9
IndivQLearningVar2/90_9_0	decentralized	True	-10	True	GridWorld	Pentagon	PartialObsDiscrete	Individual_Q	0.2	0.2	1000000	0
IndivQLearningVar2/91_9_1	decentralized	True	-10	True	GridWorld	Pentagon	PartialObsDiscrete	Individual_Q	0.2	0.2	1000000	1
IndivQLearningVar2/92_9_2	decentralized	True	-10	True	GridWorld	Pentagon	PartialObsDiscrete	Individual_Q	0.2	0.2	1000000	2
IndivQLearningVar2/93_9_3	decentralized	True	-10	True	GridWorld	Pentagon	PartialObsDiscrete	Individual_Q	0.2	0.2	1000000	3
IndivQLearningVar2/94_9_4	decentralized	True	-10	True	GridWorld	Pentagon	PartialObsDiscrete	Individual_Q	0.2	0.2	1000000	4
IndivQLearningVar2/95_9_5	decentralized	True	-10	True	GridWorld	Pentagon	PartialObsDiscrete	Individual_Q	0.2	0.2	1000000	5
IndivQLearningVar2/96_9_6	decentralized	True	-10	True	GridWorld	Pentagon	PartialObsDiscrete	Individual_Q	0.2	0.2	1000000	6
IndivQLearningVar2/97_9_7	decentralized	True	-10	True	GridWorld	Pentagon	PartialObsDiscrete	Individual_Q	0.2	0.2	1000000	7
IndivQLearningVar2/98_9_8	decentralized	True	-10	True	GridWorld	Pentagon	PartialObsDiscrete	Individual_Q	0.2	0.2	1000000	8
IndivQLearningVar2/99_9_9	decentralized	True	-10	True	GridWorld	Pentagon	PartialObsDiscrete	Individual_Q	0.2	0.2	1000000	9
IndivQLearningVar2/100_10_0	decentralized	False	0	True	GridWorld	Pentagon	PartialObsDiscrete	Individual_Q	0.2	0.01	1000000	0
IndivQLearningVar2/101_10_1	decentralized	False	0	True	GridWorld	Pentagon	PartialObsDiscrete	Individual_Q	0.2	0.01	1000000	1
IndivQLearningVar2/102_10_2	decentralized	False	0	True	GridWorld	Pentagon	PartialObsDiscrete	Individual_Q	0.2	0.01	1000000	2
IndivQLearningVar2/103_10_3	decentralized	False	0	True	GridWorld	Pentagon	PartialObsDiscrete	Individual_Q	0.2	0.01	1000000	3
IndivQLearningVar2/104_10_4	decentralized	False	0	True	GridWorld	Pentagon	PartialObsDiscrete	Individual_Q	0.2	0.01	1000000	4
IndivQLearningVar2/105_10_5	decentralized	False	0	True	GridWorld	Pentagon	PartialObsDiscrete	Individual_Q	0.2	0.01	1000000	5
IndivQLearningVar2/106_10_6	decentralized	False	0	True	GridWorld	Pentagon	PartialObsDiscrete	Individual_Q	0.2	0.01	1000000	6
IndivQLearningVar2/107_10_7	decentralized	False	0	True	GridWorld	Pentagon	PartialObsDiscrete	Individual_Q	0.2	0.01	1000000	7
IndivQLearningVar2/108_10_8	decentralized	False	0	True	GridWorld	Pentagon	PartialObsDiscrete	Individual_Q	0.2	0.01	1000000	8
IndivQLearningVar2/109_10_9	decentralized	False	0	True	GridWorld	Pentagon	PartialObsDiscrete	Individual_Q	0.2	0.01	1000000	9
IndivQLearningVar2/110_11_0	decentralized	True	-10	True	GridWorld	Pentagon	PartialObsDiscrete	Individual_Q	0.2	0.01	1000000	0
IndivQLearningVar2/111_11_1	decentralized	True	-10	True	GridWorld	Pentagon	PartialObsDiscrete	Individual_Q	0.2	0.01	1000000	1
IndivQLearningVar2/112_11_2	decentralized	True	-10	True	GridWorld	Pentagon	PartialObsDiscrete	Individual_Q	0.2	0.01	1000000	2
IndivQLearningVar2/113_11_3	decentralized	True	-10	True	GridWorld	Pentagon	PartialObsDiscrete	Individual_Q	0.2	0.01	1000000	3
IndivQLearningVar2/114_11_4	decentralized	True	-10	True	GridWorld	Pentagon	PartialObsDiscrete	Individual_Q	0.2	0.01	1000000	4
IndivQLearningVar2/115_11_5	decentralized	True	-10	True	GridWorld	Pentagon	PartialObsDiscrete	Individual_Q	0.2	0.01	1000000	5
IndivQLearningVar2/116_11_6	decentralized	True	-10	True	GridWorld	Pentagon	PartialObsDiscrete	Individual_Q	0.2	0.01	1000000	6
IndivQLearningVar2/117_11_7	decentralized	True	-10	True	GridWorld	Pentagon	PartialObsDiscrete	Individual_Q	0.2	0.01	1000000	7
IndivQLearningVar2/118_11_8	decentralized	True	-10	True	GridWorld	Pentagon	PartialObsDiscrete	Individual_Q	0.2	0.01	1000000	8
IndivQLearningVar2/119_11_9	decentralized	True	-10	True	GridWorld	Pentagon	PartialObsDiscrete	Individual_Q	0.2	0.01	1000000	9
IndivQLearningVar2/120_12_0	decentralized	False	0	True	GridWorld	Pentagon	FullObsDiscrete	Individual_Q	0.2	0.2	1000000	0
IndivQLearningVar2/121_12_1	decentralized	False	0	True	GridWorld	Pentagon	FullObsDiscrete	Individual_Q	0.2	0.2	1000000	1
IndivQLearningVar2/122_12_2	decentralized	False	0	True	GridWorld	Pentagon	FullObsDiscrete	Individual_Q	0.2	0.2	1000000	2
IndivQLearningVar2/123_12_3	decentralized	False	0	True	GridWorld	Pentagon	FullObsDiscrete	Individual_Q	0.2	0.2	1000000	3
IndivQLearningVar2/124_12_4	decentralized	False	0	True	GridWorld	Pentagon	FullObsDiscrete	Individual_Q	0.2	0.2	1000000	4
IndivQLearningVar2/125_12_5	decentralized	False	0	True	GridWorld	Pentagon	FullObsDiscrete	Individual_Q	0.2	0.2	1000000	5
IndivQLearningVar2/126_12_6	decentralized	False	0	True	GridWorld	Pentagon	FullObsDiscrete	Individual_Q	0.2	0.2	1000000	6
IndivQLearningVar2/127_12_7	decentralized	False	0	True	GridWorld	Pentagon	FullObsDiscrete	Individual_Q	0.2	0.2	1000000	7
IndivQLearningVar2/128_12_8	decentralized	False	0	True	GridWorld	Pentagon	FullObsDiscrete	Individual_Q	0.2	0.2	1000000	8
IndivQLearningVar2/129_12_9	decentralized	False	0	True	GridWorld	Pentagon	FullObsDiscrete	Individual_Q	0.2	0.2	1000000	9
IndivQLearningVar2/130_13_0	decentralized	True	-10	True	GridWorld	Pentagon	FullObsDiscrete	Individual_Q	0.2	0.2	1000000	0
IndivQLearningVar2/131_13_1	decentralized	True	-10	True	GridWorld	Pentagon	FullObsDiscrete	Individual_Q	0.2	0.2	1000000	1
IndivQLearningVar2/132_13_2	decentralized	True	-10	True	GridWorld	Pentagon	FullObsDiscrete	Individual_Q	0.2	0.2	1000000	2
IndivQLearningVar2/133_13_3	decentralized	True	-10	True	GridWorld	Pentagon	FullObsDiscrete	Individual_Q	0.2	0.2	1000000	3
IndivQLearningVar2/134_13_4	decentralized	True	-10	True	GridWorld	Pentagon	FullObsDiscrete	Individual_Q	0.2	0.2	1000000	4
IndivQLearningVar2/135_13_5	decentralized	True	-10	True	GridWorld	Pentagon	FullObsDiscrete	Individual_Q	0.2	0.2	1000000	5
IndivQLearningVar2/136_13_6	decentralized	True	-10	True	GridWorld	Pentagon	FullObsDiscrete	Individual_Q	0.2	0.2	1000000	6
IndivQLearningVar2/137_13_7	decentralized	True	-10	True	GridWorld	Pentagon	FullObsDiscrete	Individual_Q	0.2	0.2	1000000	7
IndivQLearningVar2/138_13_8	decentralized	True	-10	True	GridWorld	Pentagon	FullObsDiscrete	Individual_Q	0.2	0.2	1000000	8
IndivQLearningVar2/139_13_9	decentralized	True	-10	True	GridWorld	Pentagon	FullObsDiscrete	Individual_Q	0.2	0.2	1000000	9
IndivQLearningVar2/140_14_0	decentralized	False	0	True	GridWorld	Pentagon	FullObsDiscrete	Individual_Q	0.2	0.01	1000000	0
IndivQLearningVar2/141_14_1	decentralized	False	0	True	GridWorld	Pentagon	FullObsDiscrete	Individual_Q	0.2	0.01	1000000	1
IndivQLearningVar2/142_14_2	decentralized	False	0	True	GridWorld	Pentagon	FullObsDiscrete	Individual_Q	0.2	0.01	1000000	2
IndivQLearningVar2/143_14_3	decentralized	False	0	True	GridWorld	Pentagon	FullObsDiscrete	Individual_Q	0.2	0.01	1000000	3
IndivQLearningVar2/144_14_4	decentralized	False	0	True	GridWorld	Pentagon	FullObsDiscrete	Individual_Q	0.2	0.01	1000000	4
IndivQLearningVar2/145_14_5	decentralized	False	0	True	GridWorld	Pentagon	FullObsDiscrete	Individual_Q	0.2	0.01	1000000	5
IndivQLearningVar2/146_14_6	decentralized	False	0	True	GridWorld	Pentagon	FullObsDiscrete	Individual_Q	0.2	0.01	1000000	6
IndivQLearningVar2/147_14_7	decentralized	False	0	True	GridWorld	Pentagon	FullObsDiscrete	Individual_Q	0.2	0.01	1000000	7
IndivQLearningVar2/148_14_8	decentralized	False	0	True	GridWorld	Pentagon	FullObsDiscrete	Individual_Q	0.2	0.01	1000000	8
IndivQLearningVar2/149_14_9	decentralized	False	0	True	GridWorld	Pentagon	FullObsDiscrete	Individual_Q	0.2	0.01	1000000	9
IndivQLearningVar2/150_15_0	decentralized	True	-10	True	GridWorld	Pentagon	FullObsDiscrete	Individual_Q	0.2	0.01	1000000	0
IndivQLearningVar2/151_15_1	decentralized	True	-10	True	GridWorld	Pentagon	FullObsDiscrete	Individual_Q	0.2	0.01	1000000	1
IndivQLearningVar2/152_15_2	decentralized	True	-10	True	GridWorld	Pentagon	FullObsDiscrete	Individual_Q	0.2	0.01	1000000	2
IndivQLearningVar2/153_15_3	decentralized	True	-10	True	GridWorld	Pentagon	FullObsDiscrete	Individual_Q	0.2	0.01	1000000	3
IndivQLearningVar2/154_15_4	decentralized	True	-10	True	GridWorld	Pentagon	FullObsDiscrete	Individual_Q	0.2	0.01	1000000	4
IndivQLearningVar2/155_15_5	decentralized	True	-10	True	GridWorld	Pentagon	FullObsDiscrete	Individual_Q	0.2	0.01	1000000	5
IndivQLearningVar2/156_15_6	decentralized	True	-10	True	GridWorld	Pentagon	FullObsDiscrete	Individual_Q	0.2	0.01	1000000	6
IndivQLearningVar2/157_15_7	decentralized	True	-10	True	GridWorld	Pentagon	FullObsDiscrete	Individual_Q	0.2	0.01	1000000	7
IndivQLearningVar2/158_15_8	decentralized	True	-10	True	GridWorld	Pentagon	FullObsDiscrete	Individual_Q	0.2	0.01	1000000	8
IndivQLearningVar2/159_15_9	decentralized	True	-10	True	GridWorld	Pentagon	FullObsDiscrete	Individual_Q	0.2	0.01	1000000	9
IndivQLearningVar2/160_16_0	none	False	0	True	GridWorld	Pentagon	PartialObsDiscrete	Individual_Q	0.2	0.2	1000000	0
IndivQLearningVar2/161_16_1	none	False	0	True	GridWorld	Pentagon	PartialObsDiscrete	Individual_Q	0.2	0.2	1000000	1
IndivQLearningVar2/162_16_2	none	False	0	True	GridWorld	Pentagon	PartialObsDiscrete	Individual_Q	0.2	0.2	1000000	2
IndivQLearningVar2/163_16_3	none	False	0	True	GridWorld	Pentagon	PartialObsDiscrete	Individual_Q	0.2	0.2	1000000	3
IndivQLearningVar2/164_16_4	none	False	0	True	GridWorld	Pentagon	PartialObsDiscrete	Individual_Q	0.2	0.2	1000000	4
IndivQLearningVar2/165_16_5	none	False	0	True	GridWorld	Pentagon	PartialObsDiscrete	Individual_Q	0.2	0.2	1000000	5
IndivQLearningVar2/166_16_6	none	False	0	True	GridWorld	Pentagon	PartialObsDiscrete	Individual_Q	0.2	0.2	1000000	6
IndivQLearningVar2/167_16_7	none	False	0	True	GridWorld	Pentagon	PartialObsDiscrete	Individual_Q	0.2	0.2	1000000	7
IndivQLearningVar2/168_16_8	none	False	0	True	GridWorld	Pentagon	PartialObsDiscrete	Individual_Q	0.2	0.2	1000000	8
IndivQLearningVar2/169_16_9	none	False	0	True	GridWorld	Pentagon	PartialObsDiscrete	Individual_Q	0.2	0.2	1000000	9
IndivQLearningVar2/170_17_0	none	True	-10	True	GridWorld	Pentagon	PartialObsDiscrete	Individual_Q	0.2	0.2	1000000	0
IndivQLearningVar2/171_17_1	none	True	-10	True	GridWorld	Pentagon	PartialObsDiscrete	Individual_Q	0.2	0.2	1000000	1
IndivQLearningVar2/172_17_2	none	True	-10	True	GridWorld	Pentagon	PartialObsDiscrete	Individual_Q	0.2	0.2	1000000	2
IndivQLearningVar2/173_17_3	none	True	-10	True	GridWorld	Pentagon	PartialObsDiscrete	Individual_Q	0.2	0.2	1000000	3
IndivQLearningVar2/174_17_4	none	True	-10	True	GridWorld	Pentagon	PartialObsDiscrete	Individual_Q	0.2	0.2	1000000	4
IndivQLearningVar2/175_17_5	none	True	-10	True	GridWorld	Pentagon	PartialObsDiscrete	Individual_Q	0.2	0.2	1000000	5
IndivQLearningVar2/176_17_6	none	True	-10	True	GridWorld	Pentagon	PartialObsDiscrete	Individual_Q	0.2	0.2	1000000	6
IndivQLearningVar2/177_17_7	none	True	-10	True	GridWorld	Pentagon	PartialObsDiscrete	Individual_Q	0.2	0.2	1000000	7
IndivQLearningVar2/178_17_8	none	True	-10	True	GridWorld	Pentagon	PartialObsDiscrete	Individual_Q	0.2	0.2	1000000	8
IndivQLearningVar2/179_17_9	none	True	-10	True	GridWorld	Pentagon	PartialObsDiscrete	Individual_Q	0.2	0.2	1000000	9
IndivQLearningVar2/180_18_0	none	False	0	True	GridWorld	Pentagon	PartialObsDiscrete	Individual_Q	0.2	0.01	1000000	0
IndivQLearningVar2/181_18_1	none	False	0	True	GridWorld	Pentagon	PartialObsDiscrete	Individual_Q	0.2	0.01	1000000	1
IndivQLearningVar2/182_18_2	none	False	0	True	GridWorld	Pentagon	PartialObsDiscrete	Individual_Q	0.2	0.01	1000000	2
IndivQLearningVar2/183_18_3	none	False	0	True	GridWorld	Pentagon	PartialObsDiscrete	Individual_Q	0.2	0.01	1000000	3
IndivQLearningVar2/184_18_4	none	False	0	True	GridWorld	Pentagon	PartialObsDiscrete	Individual_Q	0.2	0.01	1000000	4
IndivQLearningVar2/185_18_5	none	False	0	True	GridWorld	Pentagon	PartialObsDiscrete	Individual_Q	0.2	0.01	1000000	5
IndivQLearningVar2/186_18_6	none	False	0	True	GridWorld	Pentagon	PartialObsDiscrete	Individual_Q	0.2	0.01	1000000	6
IndivQLearningVar2/187_18_7	none	False	0	True	GridWorld	Pentagon	PartialObsDiscrete	Individual_Q	0.2	0.01	1000000	7
IndivQLearningVar2/188_18_8	none	False	0	True	GridWorld	Pentagon	PartialObsDiscrete	Individual_Q	0.2	0.01	1000000	8
IndivQLearningVar2/189_18_9	none	False	0	True	GridWorld	Pentagon	PartialObsDiscrete	Individual_Q	0.2	0.01	1000000	9
IndivQLearningVar2/190_19_0	none	True	-10	True	GridWorld	Pentagon	PartialObsDiscrete	Individual_Q	0.2	0.01	1000000	0
IndivQLearningVar2/191_19_1	none	True	-10	True	GridWorld	Pentagon	PartialObsDiscrete	Individual_Q	0.2	0.01	1000000	1
IndivQLearningVar2/192_19_2	none	True	-10	True	GridWorld	Pentagon	PartialObsDiscrete	Individual_Q	0.2	0.01	1000000	2
IndivQLearningVar2/193_19_3	none	True	-10	True	GridWorld	Pentagon	PartialObsDiscrete	Individual_Q	0.2	0.01	1000000	3
IndivQLearningVar2/194_19_4	none	True	-10	True	GridWorld	Pentagon	PartialObsDiscrete	Individual_Q	0.2	0.01	1000000	4
IndivQLearningVar2/195_19_5	none	True	-10	True	GridWorld	Pentagon	PartialObsDiscrete	Individual_Q	0.2	0.01	1000000	5
IndivQLearningVar2/196_19_6	none	True	-10	True	GridWorld	Pentagon	PartialObsDiscrete	Individual_Q	0.2	0.01	1000000	6
IndivQLearningVar2/197_19_7	none	True	-10	True	GridWorld	Pentagon	PartialObsDiscrete	Individual_Q	0.2	0.01	1000000	7
IndivQLearningVar2/198_19_8	none	True	-10	True	GridWorld	Pentagon	PartialObsDiscrete	Individual_Q	0.2	0.01	1000000	8
IndivQLearningVar2/199_19_9	none	True	-10	True	GridWorld	Pentagon	PartialObsDiscrete	Individual_Q	0.2	0.01	1000000	9
IndivQLearningVar2/200_20_0	none	False	0	True	GridWorld	Pentagon	FullObsDiscrete	Individual_Q	0.2	0.2	1000000	0
IndivQLearningVar2/201_20_1	none	False	0	True	GridWorld	Pentagon	FullObsDiscrete	Individual_Q	0.2	0.2	1000000	1
IndivQLearningVar2/202_20_2	none	False	0	True	GridWorld	Pentagon	FullObsDiscrete	Individual_Q	0.2	0.2	1000000	2
IndivQLearningVar2/203_20_3	none	False	0	True	GridWorld	Pentagon	FullObsDiscrete	Individual_Q	0.2	0.2	1000000	3
IndivQLearningVar2/204_20_4	none	False	0	True	GridWorld	Pentagon	FullObsDiscrete	Individual_Q	0.2	0.2	1000000	4
IndivQLearningVar2/205_20_5	none	False	0	True	GridWorld	Pentagon	FullObsDiscrete	Individual_Q	0.2	0.2	1000000	5
IndivQLearningVar2/206_20_6	none	False	0	True	GridWorld	Pentagon	FullObsDiscrete	Individual_Q	0.2	0.2	1000000	6
IndivQLearningVar2/207_20_7	none	False	0	True	GridWorld	Pentagon	FullObsDiscrete	Individual_Q	0.2	0.2	1000000	7
IndivQLearningVar2/208_20_8	none	False	0	True	GridWorld	Pentagon	FullObsDiscrete	Individual_Q	0.2	0.2	1000000	8
IndivQLearningVar2/209_20_9	none	False	0	True	GridWorld	Pentagon	FullObsDiscrete	Individual_Q	0.2	0.2	1000000	9
IndivQLearningVar2/210_21_0	none	True	-10	True	GridWorld	Pentagon	FullObsDiscrete	Individual_Q	0.2	0.2	1000000	0
IndivQLearningVar2/211_21_1	none	True	-10	True	GridWorld	Pentagon	FullObsDiscrete	Individual_Q	0.2	0.2	1000000	1
IndivQLearningVar2/212_21_2	none	True	-10	True	GridWorld	Pentagon	FullObsDiscrete	Individual_Q	0.2	0.2	1000000	2
IndivQLearningVar2/213_21_3	none	True	-10	True	GridWorld	Pentagon	FullObsDiscrete	Individual_Q	0.2	0.2	1000000	3
IndivQLearningVar2/214_21_4	none	True	-10	True	GridWorld	Pentagon	FullObsDiscrete	Individual_Q	0.2	0.2	1000000	4
IndivQLearningVar2/215_21_5	none	True	-10	True	GridWorld	Pentagon	FullObsDiscrete	Individual_Q	0.2	0.2	1000000	5
IndivQLearningVar2/216_21_6	none	True	-10	True	GridWorld	Pentagon	FullObsDiscrete	Individual_Q	0.2	0.2	1000000	6
IndivQLearningVar2/217_21_7	none	True	-10	True	GridWorld	Pentagon	FullObsDiscrete	Individual_Q	0.2	0.2	1000000	7
IndivQLearningVar2/218_21_8	none	True	-10	True	GridWorld	Pentagon	FullObsDiscrete	Individual_Q	0.2	0.2	1000000	8
IndivQLearningVar2/219_21_9	none	True	-10	True	GridWorld	Pentagon	FullObsDiscrete	Individual_Q	0.2	0.2	1000000	9
IndivQLearningVar2/220_22_0	none	False	0	True	GridWorld	Pentagon	FullObsDiscrete	Individual_Q	0.2	0.01	1000000	0
IndivQLearningVar2/221_22_1	none	False	0	True	GridWorld	Pentagon	FullObsDiscrete	Individual_Q	0.2	0.01	1000000	1
IndivQLearningVar2/222_22_2	none	False	0	True	GridWorld	Pentagon	FullObsDiscrete	Individual_Q	0.2	0.01	1000000	2
IndivQLearningVar2/223_22_3	none	False	0	True	GridWorld	Pentagon	FullObsDiscrete	Individual_Q	0.2	0.01	1000000	3
IndivQLearningVar2/224_22_4	none	False	0	True	GridWorld	Pentagon	FullObsDiscrete	Individual_Q	0.2	0.01	1000000	4
IndivQLearningVar2/225_22_5	none	False	0	True	GridWorld	Pentagon	FullObsDiscrete	Individual_Q	0.2	0.01	1000000	5
IndivQLearningVar2/226_22_6	none	False	0	True	GridWorld	Pentagon	FullObsDiscrete	Individual_Q	0.2	0.01	1000000	6
IndivQLearningVar2/227_22_7	none	False	0	True	GridWorld	Pentagon	FullObsDiscrete	Individual_Q	0.2	0.01	1000000	7
IndivQLearningVar2/228_22_8	none	False	0	True	GridWorld	Pentagon	FullObsDiscrete	Individual_Q	0.2	0.01	1000000	8
IndivQLearningVar2/229_22_9	none	False	0	True	GridWorld	Pentagon	FullObsDiscrete	Individual_Q	0.2	0.01	1000000	9
IndivQLearningVar2/230_23_0	none	True	-10	True	GridWorld	Pentagon	FullObsDiscrete	Individual_Q	0.2	0.01	1000000	0
IndivQLearningVar2/231_23_1	none	True	-10	True	GridWorld	Pentagon	FullObsDiscrete	Individual_Q	0.2	0.01	1000000	1
IndivQLearningVar2/232_23_2	none	True	-10	True	GridWorld	Pentagon	FullObsDiscrete	Individual_Q	0.2	0.01	1000000	2
IndivQLearningVar2/233_23_3	none	True	-10	True	GridWorld	Pentagon	FullObsDiscrete	Individual_Q	0.2	0.01	1000000	3
IndivQLearningVar2/234_23_4	none	True	-10	True	GridWorld	Pentagon	FullObsDiscrete	Individual_Q	0.2	0.01	1000000	4
IndivQLearningVar2/235_23_5	none	True	-10	True	GridWorld	Pentagon	FullObsDiscrete	Individual_Q	0.2	0.01	1000000	5
IndivQLearningVar2/236_23_6	none	True	-10	True	GridWorld	Pentagon	FullObsDiscrete	Individual_Q	0.2	0.01	1000000	6
IndivQLearningVar2/237_23_7	none	True	-10	True	GridWorld	Pentagon	FullObsDiscrete	Individual_Q	0.2	0.01	1000000	7
IndivQLearningVar2/238_23_8	none	True	-10	True	GridWorld	Pentagon	FullObsDiscrete	Individual_Q	0.2	0.01	1000000	8
IndivQLearningVar2/239_23_9	none	True	-10	True	GridWorld	Pentagon	FullObsDiscrete	Individual_Q	0.2	0.01	1000000	9
IndivQLearningVar2/240_24_0	centralized	False	0	False	GridWorld	Pentagon	PartialObsDiscrete	Individual_Q	0.2	0.2	1000000	0
IndivQLearningVar2/241_24_1	centralized	False	0	False	GridWorld	Pentagon	PartialObsDiscrete	Individual_Q	0.2	0.2	1000000	1
IndivQLearningVar2/242_24_2	centralized	False	0	False	GridWorld	Pentagon	PartialObsDiscrete	Individual_Q	0.2	0.2	1000000	2
IndivQLearningVar2/243_24_3	centralized	False	0	False	GridWorld	Pentagon	PartialObsDiscrete	Individual_Q	0.2	0.2	1000000	3
IndivQLearningVar2/244_24_4	centralized	False	0	False	GridWorld	Pentagon	PartialObsDiscrete	Individual_Q	0.2	0.2	1000000	4
IndivQLearningVar2/245_24_5	centralized	False	0	False	GridWorld	Pentagon	PartialObsDiscrete	Individual_Q	0.2	0.2	1000000	5
IndivQLearningVar2/246_24_6	centralized	False	0	False	GridWorld	Pentagon	PartialObsDiscrete	Individual_Q	0.2	0.2	1000000	6
IndivQLearningVar2/247_24_7	centralized	False	0	False	GridWorld	Pentagon	PartialObsDiscrete	Individual_Q	0.2	0.2	1000000	7
IndivQLearningVar2/248_24_8	centralized	False	0	False	GridWorld	Pentagon	PartialObsDiscrete	Individual_Q	0.2	0.2	1000000	8
IndivQLearningVar2/249_24_9	centralized	False	0	False	GridWorld	Pentagon	PartialObsDiscrete	Individual_Q	0.2	0.2	1000000	9
IndivQLearningVar2/250_25_0	centralized	True	-10	False	GridWorld	Pentagon	PartialObsDiscrete	Individual_Q	0.2	0.2	1000000	0
IndivQLearningVar2/251_25_1	centralized	True	-10	False	GridWorld	Pentagon	PartialObsDiscrete	Individual_Q	0.2	0.2	1000000	1
IndivQLearningVar2/252_25_2	centralized	True	-10	False	GridWorld	Pentagon	PartialObsDiscrete	Individual_Q	0.2	0.2	1000000	2
IndivQLearningVar2/253_25_3	centralized	True	-10	False	GridWorld	Pentagon	PartialObsDiscrete	Individual_Q	0.2	0.2	1000000	3
IndivQLearningVar2/254_25_4	centralized	True	-10	False	GridWorld	Pentagon	PartialObsDiscrete	Individual_Q	0.2	0.2	1000000	4
IndivQLearningVar2/255_25_5	centralized	True	-10	False	GridWorld	Pentagon	PartialObsDiscrete	Individual_Q	0.2	0.2	1000000	5
IndivQLearningVar2/256_25_6	centralized	True	-10	False	GridWorld	Pentagon	PartialObsDiscrete	Individual_Q	0.2	0.2	1000000	6
IndivQLearningVar2/257_25_7	centralized	True	-10	False	GridWorld	Pentagon	PartialObsDiscrete	Individual_Q	0.2	0.2	1000000	7
IndivQLearningVar2/258_25_8	centralized	True	-10	False	GridWorld	Pentagon	PartialObsDiscrete	Individual_Q	0.2	0.2	1000000	8
IndivQLearningVar2/259_25_9	centralized	True	-10	False	GridWorld	Pentagon	PartialObsDiscrete	Individual_Q	0.2	0.2	1000000	9
IndivQLearningVar2/260_26_0	centralized	False	0	False	GridWorld	Pentagon	PartialObsDiscrete	Individual_Q	0.2	0.01	1000000	0
IndivQLearningVar2/261_26_1	centralized	False	0	False	GridWorld	Pentagon	PartialObsDiscrete	Individual_Q	0.2	0.01	1000000	1
IndivQLearningVar2/262_26_2	centralized	False	0	False	GridWorld	Pentagon	PartialObsDiscrete	Individual_Q	0.2	0.01	1000000	2
IndivQLearningVar2/263_26_3	centralized	False	0	False	GridWorld	Pentagon	PartialObsDiscrete	Individual_Q	0.2	0.01	1000000	3
IndivQLearningVar2/264_26_4	centralized	False	0	False	GridWorld	Pentagon	PartialObsDiscrete	Individual_Q	0.2	0.01	1000000	4
IndivQLearningVar2/265_26_5	centralized	False	0	False	GridWorld	Pentagon	PartialObsDiscrete	Individual_Q	0.2	0.01	1000000	5
IndivQLearningVar2/266_26_6	centralized	False	0	False	GridWorld	Pentagon	PartialObsDiscrete	Individual_Q	0.2	0.01	1000000	6
IndivQLearningVar2/267_26_7	centralized	False	0	False	GridWorld	Pentagon	PartialObsDiscrete	Individual_Q	0.2	0.01	1000000	7
IndivQLearningVar2/268_26_8	centralized	False	0	False	GridWorld	Pentagon	PartialObsDiscrete	Individual_Q	0.2	0.01	1000000	8
IndivQLearningVar2/269_26_9	centralized	False	0	False	GridWorld	Pentagon	PartialObsDiscrete	Individual_Q	0.2	0.01	1000000	9
IndivQLearningVar2/270_27_0	centralized	True	-10	False	GridWorld	Pentagon	PartialObsDiscrete	Individual_Q	0.2	0.01	1000000	0
IndivQLearningVar2/271_27_1	centralized	True	-10	False	GridWorld	Pentagon	PartialObsDiscrete	Individual_Q	0.2	0.01	1000000	1
IndivQLearningVar2/272_27_2	centralized	True	-10	False	GridWorld	Pentagon	PartialObsDiscrete	Individual_Q	0.2	0.01	1000000	2
IndivQLearningVar2/273_27_3	centralized	True	-10	False	GridWorld	Pentagon	PartialObsDiscrete	Individual_Q	0.2	0.01	1000000	3
IndivQLearningVar2/274_27_4	centralized	True	-10	False	GridWorld	Pentagon	PartialObsDiscrete	Individual_Q	0.2	0.01	1000000	4
IndivQLearningVar2/275_27_5	centralized	True	-10	False	GridWorld	Pentagon	PartialObsDiscrete	Individual_Q	0.2	0.01	1000000	5
IndivQLearningVar2/276_27_6	centralized	True	-10	False	GridWorld	Pentagon	PartialObsDiscrete	Individual_Q	0.2	0.01	1000000	6
IndivQLearningVar2/277_27_7	centralized	True	-10	False	GridWorld	Pentagon	PartialObsDiscrete	Individual_Q	0.2	0.01	1000000	7
IndivQLearningVar2/278_27_8	centralized	True	-10	False	GridWorld	Pentagon	PartialObsDiscrete	Individual_Q	0.2	0.01	1000000	8
IndivQLearningVar2/279_27_9	centralized	True	-10	False	GridWorld	Pentagon	PartialObsDiscrete	Individual_Q	0.2	0.01	1000000	9
IndivQLearningVar2/280_28_0	centralized	False	0	False	GridWorld	Pentagon	FullObsDiscrete	Individual_Q	0.2	0.2	1000000	0
IndivQLearningVar2/281_28_1	centralized	False	0	False	GridWorld	Pentagon	FullObsDiscrete	Individual_Q	0.2	0.2	1000000	1
IndivQLearningVar2/282_28_2	centralized	False	0	False	GridWorld	Pentagon	FullObsDiscrete	Individual_Q	0.2	0.2	1000000	2
IndivQLearningVar2/283_28_3	centralized	False	0	False	GridWorld	Pentagon	FullObsDiscrete	Individual_Q	0.2	0.2	1000000	3
IndivQLearningVar2/284_28_4	centralized	False	0	False	GridWorld	Pentagon	FullObsDiscrete	Individual_Q	0.2	0.2	1000000	4
IndivQLearningVar2/285_28_5	centralized	False	0	False	GridWorld	Pentagon	FullObsDiscrete	Individual_Q	0.2	0.2	1000000	5
IndivQLearningVar2/286_28_6	centralized	False	0	False	GridWorld	Pentagon	FullObsDiscrete	Individual_Q	0.2	0.2	1000000	6
IndivQLearningVar2/287_28_7	centralized	False	0	False	GridWorld	Pentagon	FullObsDiscrete	Individual_Q	0.2	0.2	1000000	7
IndivQLearningVar2/288_28_8	centralized	False	0	False	GridWorld	Pentagon	FullObsDiscrete	Individual_Q	0.2	0.2	1000000	8
IndivQLearningVar2/289_28_9	centralized	False	0	False	GridWorld	Pentagon	FullObsDiscrete	Individual_Q	0.2	0.2	1000000	9
IndivQLearningVar2/290_29_0	centralized	True	-10	False	GridWorld	Pentagon	FullObsDiscrete	Individual_Q	0.2	0.2	1000000	0
IndivQLearningVar2/291_29_1	centralized	True	-10	False	GridWorld	Pentagon	FullObsDiscrete	Individual_Q	0.2	0.2	1000000	1
IndivQLearningVar2/292_29_2	centralized	True	-10	False	GridWorld	Pentagon	FullObsDiscrete	Individual_Q	0.2	0.2	1000000	2
IndivQLearningVar2/293_29_3	centralized	True	-10	False	GridWorld	Pentagon	FullObsDiscrete	Individual_Q	0.2	0.2	1000000	3
IndivQLearningVar2/294_29_4	centralized	True	-10	False	GridWorld	Pentagon	FullObsDiscrete	Individual_Q	0.2	0.2	1000000	4
IndivQLearningVar2/295_29_5	centralized	True	-10	False	GridWorld	Pentagon	FullObsDiscrete	Individual_Q	0.2	0.2	1000000	5
IndivQLearningVar2/296_29_6	centralized	True	-10	False	GridWorld	Pentagon	FullObsDiscrete	Individual_Q	0.2	0.2	1000000	6
IndivQLearningVar2/297_29_7	centralized	True	-10	False	GridWorld	Pentagon	FullObsDiscrete	Individual_Q	0.2	0.2	1000000	7
IndivQLearningVar2/298_29_8	centralized	True	-10	False	GridWorld	Pentagon	FullObsDiscrete	Individual_Q	0.2	0.2	1000000	8
IndivQLearningVar2/299_29_9	centralized	True	-10	False	GridWorld	Pentagon	FullObsDiscrete	Individual_Q	0.2	0.2	1000000	9
IndivQLearningVar2/300_30_0	centralized	False	0	False	GridWorld	Pentagon	FullObsDiscrete	Individual_Q	0.2	0.01	1000000	0
IndivQLearningVar2/301_30_1	centralized	False	0	False	GridWorld	Pentagon	FullObsDiscrete	Individual_Q	0.2	0.01	1000000	1
IndivQLearningVar2/302_30_2	centralized	False	0	False	GridWorld	Pentagon	FullObsDiscrete	Individual_Q	0.2	0.01	1000000	2
IndivQLearningVar2/303_30_3	centralized	False	0	False	GridWorld	Pentagon	FullObsDiscrete	Individual_Q	0.2	0.01	1000000	3
IndivQLearningVar2/304_30_4	centralized	False	0	False	GridWorld	Pentagon	FullObsDiscrete	Individual_Q	0.2	0.01	1000000	4
IndivQLearningVar2/305_30_5	centralized	False	0	False	GridWorld	Pentagon	FullObsDiscrete	Individual_Q	0.2	0.01	1000000	5
IndivQLearningVar2/306_30_6	centralized	False	0	False	GridWorld	Pentagon	FullObsDiscrete	Individual_Q	0.2	0.01	1000000	6
IndivQLearningVar2/307_30_7	centralized	False	0	False	GridWorld	Pentagon	FullObsDiscrete	Individual_Q	0.2	0.01	1000000	7
IndivQLearningVar2/308_30_8	centralized	False	0	False	GridWorld	Pentagon	FullObsDiscrete	Individual_Q	0.2	0.01	1000000	8
IndivQLearningVar2/309_30_9	centralized	False	0	False	GridWorld	Pentagon	FullObsDiscrete	Individual_Q	0.2	0.01	1000000	9
IndivQLearningVar2/310_31_0	centralized	True	-10	False	GridWorld	Pentagon	FullObsDiscrete	Individual_Q	0.2	0.01	1000000	0
IndivQLearningVar2/311_31_1	centralized	True	-10	False	GridWorld	Pentagon	FullObsDiscrete	Individual_Q	0.2	0.01	1000000	1
IndivQLearningVar2/312_31_2	centralized	True	-10	False	GridWorld	Pentagon	FullObsDiscrete	Individual_Q	0.2	0.01	1000000	2
IndivQLearningVar2/313_31_3	centralized	True	-10	False	GridWorld	Pentagon	FullObsDiscrete	Individual_Q	0.2	0.01	1000000	3
IndivQLearningVar2/314_31_4	centralized	True	-10	False	GridWorld	Pentagon	FullObsDiscrete	Individual_Q	0.2	0.01	1000000	4
IndivQLearningVar2/315_31_5	centralized	True	-10	False	GridWorld	Pentagon	FullObsDiscrete	Individual_Q	0.2	0.01	1000000	5
IndivQLearningVar2/316_31_6	centralized	True	-10	False	GridWorld	Pentagon	FullObsDiscrete	Individual_Q	0.2	0.01	1000000	6
IndivQLearningVar2/317_31_7	centralized	True	-10	False	GridWorld	Pentagon	FullObsDiscrete	Individual_Q	0.2	0.01	1000000	7
IndivQLearningVar2/318_31_8	centralized	True	-10	False	GridWorld	Pentagon	FullObsDiscrete	Individual_Q	0.2	0.01	1000000	8
IndivQLearningVar2/319_31_9	centralized	True	-10	False	GridWorld	Pentagon	FullObsDiscrete	Individual_Q	0.2	0.01	1000000	9
IndivQLearningVar2/320_32_0	decentralized	False	0	False	GridWorld	Pentagon	PartialObsDiscrete	Individual_Q	0.2	0.2	1000000	0
IndivQLearningVar2/321_32_1	decentralized	False	0	False	GridWorld	Pentagon	PartialObsDiscrete	Individual_Q	0.2	0.2	1000000	1
IndivQLearningVar2/322_32_2	decentralized	False	0	False	GridWorld	Pentagon	PartialObsDiscrete	Individual_Q	0.2	0.2	1000000	2
IndivQLearningVar2/323_32_3	decentralized	False	0	False	GridWorld	Pentagon	PartialObsDiscrete	Individual_Q	0.2	0.2	1000000	3
IndivQLearningVar2/324_32_4	decentralized	False	0	False	GridWorld	Pentagon	PartialObsDiscrete	Individual_Q	0.2	0.2	1000000	4
IndivQLearningVar2/325_32_5	decentralized	False	0	False	GridWorld	Pentagon	PartialObsDiscrete	Individual_Q	0.2	0.2	1000000	5
IndivQLearningVar2/326_32_6	decentralized	False	0	False	GridWorld	Pentagon	PartialObsDiscrete	Individual_Q	0.2	0.2	1000000	6
IndivQLearningVar2/327_32_7	decentralized	False	0	False	GridWorld	Pentagon	PartialObsDiscrete	Individual_Q	0.2	0.2	1000000	7
IndivQLearningVar2/328_32_8	decentralized	False	0	False	GridWorld	Pentagon	PartialObsDiscrete	Individual_Q	0.2	0.2	1000000	8
IndivQLearningVar2/329_32_9	decentralized	False	0	False	GridWorld	Pentagon	PartialObsDiscrete	Individual_Q	0.2	0.2	1000000	9
IndivQLearningVar2/330_33_0	decentralized	True	-10	False	GridWorld	Pentagon	PartialObsDiscrete	Individual_Q	0.2	0.2	1000000	0
IndivQLearningVar2/331_33_1	decentralized	True	-10	False	GridWorld	Pentagon	PartialObsDiscrete	Individual_Q	0.2	0.2	1000000	1
IndivQLearningVar2/332_33_2	decentralized	True	-10	False	GridWorld	Pentagon	PartialObsDiscrete	Individual_Q	0.2	0.2	1000000	2
IndivQLearningVar2/333_33_3	decentralized	True	-10	False	GridWorld	Pentagon	PartialObsDiscrete	Individual_Q	0.2	0.2	1000000	3
IndivQLearningVar2/334_33_4	decentralized	True	-10	False	GridWorld	Pentagon	PartialObsDiscrete	Individual_Q	0.2	0.2	1000000	4
IndivQLearningVar2/335_33_5	decentralized	True	-10	False	GridWorld	Pentagon	PartialObsDiscrete	Individual_Q	0.2	0.2	1000000	5
IndivQLearningVar2/336_33_6	decentralized	True	-10	False	GridWorld	Pentagon	PartialObsDiscrete	Individual_Q	0.2	0.2	1000000	6
IndivQLearningVar2/337_33_7	decentralized	True	-10	False	GridWorld	Pentagon	PartialObsDiscrete	Individual_Q	0.2	0.2	1000000	7
IndivQLearningVar2/338_33_8	decentralized	True	-10	False	GridWorld	Pentagon	PartialObsDiscrete	Individual_Q	0.2	0.2	1000000	8
IndivQLearningVar2/339_33_9	decentralized	True	-10	False	GridWorld	Pentagon	PartialObsDiscrete	Individual_Q	0.2	0.2	1000000	9
IndivQLearningVar2/340_34_0	decentralized	False	0	False	GridWorld	Pentagon	PartialObsDiscrete	Individual_Q	0.2	0.01	1000000	0
IndivQLearningVar2/341_34_1	decentralized	False	0	False	GridWorld	Pentagon	PartialObsDiscrete	Individual_Q	0.2	0.01	1000000	1
IndivQLearningVar2/342_34_2	decentralized	False	0	False	GridWorld	Pentagon	PartialObsDiscrete	Individual_Q	0.2	0.01	1000000	2
IndivQLearningVar2/343_34_3	decentralized	False	0	False	GridWorld	Pentagon	PartialObsDiscrete	Individual_Q	0.2	0.01	1000000	3
IndivQLearningVar2/344_34_4	decentralized	False	0	False	GridWorld	Pentagon	PartialObsDiscrete	Individual_Q	0.2	0.01	1000000	4
IndivQLearningVar2/345_34_5	decentralized	False	0	False	GridWorld	Pentagon	PartialObsDiscrete	Individual_Q	0.2	0.01	1000000	5
IndivQLearningVar2/346_34_6	decentralized	False	0	False	GridWorld	Pentagon	PartialObsDiscrete	Individual_Q	0.2	0.01	1000000	6
IndivQLearningVar2/347_34_7	decentralized	False	0	False	GridWorld	Pentagon	PartialObsDiscrete	Individual_Q	0.2	0.01	1000000	7
IndivQLearningVar2/348_34_8	decentralized	False	0	False	GridWorld	Pentagon	PartialObsDiscrete	Individual_Q	0.2	0.01	1000000	8
IndivQLearningVar2/349_34_9	decentralized	False	0	False	GridWorld	Pentagon	PartialObsDiscrete	Individual_Q	0.2	0.01	1000000	9
IndivQLearningVar2/350_35_0	decentralized	True	-10	False	GridWorld	Pentagon	PartialObsDiscrete	Individual_Q	0.2	0.01	1000000	0
IndivQLearningVar2/351_35_1	decentralized	True	-10	False	GridWorld	Pentagon	PartialObsDiscrete	Individual_Q	0.2	0.01	1000000	1
IndivQLearningVar2/352_35_2	decentralized	True	-10	False	GridWorld	Pentagon	PartialObsDiscrete	Individual_Q	0.2	0.01	1000000	2
IndivQLearningVar2/353_35_3	decentralized	True	-10	False	GridWorld	Pentagon	PartialObsDiscrete	Individual_Q	0.2	0.01	1000000	3
IndivQLearningVar2/354_35_4	decentralized	True	-10	False	GridWorld	Pentagon	PartialObsDiscrete	Individual_Q	0.2	0.01	1000000	4
IndivQLearningVar2/355_35_5	decentralized	True	-10	False	GridWorld	Pentagon	PartialObsDiscrete	Individual_Q	0.2	0.01	1000000	5
IndivQLearningVar2/356_35_6	decentralized	True	-10	False	GridWorld	Pentagon	PartialObsDiscrete	Individual_Q	0.2	0.01	1000000	6
IndivQLearningVar2/357_35_7	decentralized	True	-10	False	GridWorld	Pentagon	PartialObsDiscrete	Individual_Q	0.2	0.01	1000000	7
IndivQLearningVar2/358_35_8	decentralized	True	-10	False	GridWorld	Pentagon	PartialObsDiscrete	Individual_Q	0.2	0.01	1000000	8
IndivQLearningVar2/359_35_9	decentralized	True	-10	False	GridWorld	Pentagon	PartialObsDiscrete	Individual_Q	0.2	0.01	1000000	9
IndivQLearningVar2/360_36_0	decentralized	False	0	False	GridWorld	Pentagon	FullObsDiscrete	Individual_Q	0.2	0.2	1000000	0
IndivQLearningVar2/361_36_1	decentralized	False	0	False	GridWorld	Pentagon	FullObsDiscrete	Individual_Q	0.2	0.2	1000000	1
IndivQLearningVar2/362_36_2	decentralized	False	0	False	GridWorld	Pentagon	FullObsDiscrete	Individual_Q	0.2	0.2	1000000	2
IndivQLearningVar2/363_36_3	decentralized	False	0	False	GridWorld	Pentagon	FullObsDiscrete	Individual_Q	0.2	0.2	1000000	3
IndivQLearningVar2/364_36_4	decentralized	False	0	False	GridWorld	Pentagon	FullObsDiscrete	Individual_Q	0.2	0.2	1000000	4
IndivQLearningVar2/365_36_5	decentralized	False	0	False	GridWorld	Pentagon	FullObsDiscrete	Individual_Q	0.2	0.2	1000000	5
IndivQLearningVar2/366_36_6	decentralized	False	0	False	GridWorld	Pentagon	FullObsDiscrete	Individual_Q	0.2	0.2	1000000	6
IndivQLearningVar2/367_36_7	decentralized	False	0	False	GridWorld	Pentagon	FullObsDiscrete	Individual_Q	0.2	0.2	1000000	7
IndivQLearningVar2/368_36_8	decentralized	False	0	False	GridWorld	Pentagon	FullObsDiscrete	Individual_Q	0.2	0.2	1000000	8
IndivQLearningVar2/369_36_9	decentralized	False	0	False	GridWorld	Pentagon	FullObsDiscrete	Individual_Q	0.2	0.2	1000000	9
IndivQLearningVar2/370_37_0	decentralized	True	-10	False	GridWorld	Pentagon	FullObsDiscrete	Individual_Q	0.2	0.2	1000000	0
IndivQLearningVar2/371_37_1	decentralized	True	-10	False	GridWorld	Pentagon	FullObsDiscrete	Individual_Q	0.2	0.2	1000000	1
IndivQLearningVar2/372_37_2	decentralized	True	-10	False	GridWorld	Pentagon	FullObsDiscrete	Individual_Q	0.2	0.2	1000000	2
IndivQLearningVar2/373_37_3	decentralized	True	-10	False	GridWorld	Pentagon	FullObsDiscrete	Individual_Q	0.2	0.2	1000000	3
IndivQLearningVar2/374_37_4	decentralized	True	-10	False	GridWorld	Pentagon	FullObsDiscrete	Individual_Q	0.2	0.2	1000000	4
IndivQLearningVar2/375_37_5	decentralized	True	-10	False	GridWorld	Pentagon	FullObsDiscrete	Individual_Q	0.2	0.2	1000000	5
IndivQLearningVar2/376_37_6	decentralized	True	-10	False	GridWorld	Pentagon	FullObsDiscrete	Individual_Q	0.2	0.2	1000000	6
IndivQLearningVar2/377_37_7	decentralized	True	-10	False	GridWorld	Pentagon	FullObsDiscrete	Individual_Q	0.2	0.2	1000000	7
IndivQLearningVar2/378_37_8	decentralized	True	-10	False	GridWorld	Pentagon	FullObsDiscrete	Individual_Q	0.2	0.2	1000000	8
IndivQLearningVar2/379_37_9	decentralized	True	-10	False	GridWorld	Pentagon	FullObsDiscrete	Individual_Q	0.2	0.2	1000000	9
IndivQLearningVar2/380_38_0	decentralized	False	0	False	GridWorld	Pentagon	FullObsDiscrete	Individual_Q	0.2	0.01	1000000	0
IndivQLearningVar2/381_38_1	decentralized	False	0	False	GridWorld	Pentagon	FullObsDiscrete	Individual_Q	0.2	0.01	1000000	1
IndivQLearningVar2/382_38_2	decentralized	False	0	False	GridWorld	Pentagon	FullObsDiscrete	Individual_Q	0.2	0.01	1000000	2
IndivQLearningVar2/383_38_3	decentralized	False	0	False	GridWorld	Pentagon	FullObsDiscrete	Individual_Q	0.2	0.01	1000000	3
IndivQLearningVar2/384_38_4	decentralized	False	0	False	GridWorld	Pentagon	FullObsDiscrete	Individual_Q	0.2	0.01	1000000	4
IndivQLearningVar2/385_38_5	decentralized	False	0	False	GridWorld	Pentagon	FullObsDiscrete	Individual_Q	0.2	0.01	1000000	5
IndivQLearningVar2/386_38_6	decentralized	False	0	False	GridWorld	Pentagon	FullObsDiscrete	Individual_Q	0.2	0.01	1000000	6
IndivQLearningVar2/387_38_7	decentralized	False	0	False	GridWorld	Pentagon	FullObsDiscrete	Individual_Q	0.2	0.01	1000000	7
IndivQLearningVar2/388_38_8	decentralized	False	0	False	GridWorld	Pentagon	FullObsDiscrete	Individual_Q	0.2	0.01	1000000	8
IndivQLearningVar2/389_38_9	decentralized	False	0	False	GridWorld	Pentagon	FullObsDiscrete	Individual_Q	0.2	0.01	1000000	9
IndivQLearningVar2/390_39_0	decentralized	True	-10	False	GridWorld	Pentagon	FullObsDiscrete	Individual_Q	0.2	0.01	1000000	0
IndivQLearningVar2/391_39_1	decentralized	True	-10	False	GridWorld	Pentagon	FullObsDiscrete	Individual_Q	0.2	0.01	1000000	1
IndivQLearningVar2/392_39_2	decentralized	True	-10	False	GridWorld	Pentagon	FullObsDiscrete	Individual_Q	0.2	0.01	1000000	2
IndivQLearningVar2/393_39_3	decentralized	True	-10	False	GridWorld	Pentagon	FullObsDiscrete	Individual_Q	0.2	0.01	1000000	3
IndivQLearningVar2/394_39_4	decentralized	True	-10	False	GridWorld	Pentagon	FullObsDiscrete	Individual_Q	0.2	0.01	1000000	4
IndivQLearningVar2/395_39_5	decentralized	True	-10	False	GridWorld	Pentagon	FullObsDiscrete	Individual_Q	0.2	0.01	1000000	5
IndivQLearningVar2/396_39_6	decentralized	True	-10	False	GridWorld	Pentagon	FullObsDiscrete	Individual_Q	0.2	0.01	1000000	6
IndivQLearningVar2/397_39_7	decentralized	True	-10	False	GridWorld	Pentagon	FullObsDiscrete	Individual_Q	0.2	0.01	1000000	7
IndivQLearningVar2/398_39_8	decentralized	True	-10	False	GridWorld	Pentagon	FullObsDiscrete	Individual_Q	0.2	0.01	1000000	8
IndivQLearningVar2/399_39_9	decentralized	True	-10	False	GridWorld	Pentagon	FullObsDiscrete	Individual_Q	0.2	0.01	1000000	9
IndivQLearningVar2/400_40_0	none	False	0	False	GridWorld	Pentagon	PartialObsDiscrete	Individual_Q	0.2	0.2	1000000	0
IndivQLearningVar2/401_40_1	none	False	0	False	GridWorld	Pentagon	PartialObsDiscrete	Individual_Q	0.2	0.2	1000000	1
IndivQLearningVar2/402_40_2	none	False	0	False	GridWorld	Pentagon	PartialObsDiscrete	Individual_Q	0.2	0.2	1000000	2
IndivQLearningVar2/403_40_3	none	False	0	False	GridWorld	Pentagon	PartialObsDiscrete	Individual_Q	0.2	0.2	1000000	3
IndivQLearningVar2/404_40_4	none	False	0	False	GridWorld	Pentagon	PartialObsDiscrete	Individual_Q	0.2	0.2	1000000	4
IndivQLearningVar2/405_40_5	none	False	0	False	GridWorld	Pentagon	PartialObsDiscrete	Individual_Q	0.2	0.2	1000000	5
IndivQLearningVar2/406_40_6	none	False	0	False	GridWorld	Pentagon	PartialObsDiscrete	Individual_Q	0.2	0.2	1000000	6
IndivQLearningVar2/407_40_7	none	False	0	False	GridWorld	Pentagon	PartialObsDiscrete	Individual_Q	0.2	0.2	1000000	7
IndivQLearningVar2/408_40_8	none	False	0	False	GridWorld	Pentagon	PartialObsDiscrete	Individual_Q	0.2	0.2	1000000	8
IndivQLearningVar2/409_40_9	none	False	0	False	GridWorld	Pentagon	PartialObsDiscrete	Individual_Q	0.2	0.2	1000000	9
IndivQLearningVar2/410_41_0	none	True	-10	False	GridWorld	Pentagon	PartialObsDiscrete	Individual_Q	0.2	0.2	1000000	0
IndivQLearningVar2/411_41_1	none	True	-10	False	GridWorld	Pentagon	PartialObsDiscrete	Individual_Q	0.2	0.2	1000000	1
IndivQLearningVar2/412_41_2	none	True	-10	False	GridWorld	Pentagon	PartialObsDiscrete	Individual_Q	0.2	0.2	1000000	2
IndivQLearningVar2/413_41_3	none	True	-10	False	GridWorld	Pentagon	PartialObsDiscrete	Individual_Q	0.2	0.2	1000000	3
IndivQLearningVar2/414_41_4	none	True	-10	False	GridWorld	Pentagon	PartialObsDiscrete	Individual_Q	0.2	0.2	1000000	4
IndivQLearningVar2/415_41_5	none	True	-10	False	GridWorld	Pentagon	PartialObsDiscrete	Individual_Q	0.2	0.2	1000000	5
IndivQLearningVar2/416_41_6	none	True	-10	False	GridWorld	Pentagon	PartialObsDiscrete	Individual_Q	0.2	0.2	1000000	6
IndivQLearningVar2/417_41_7	none	True	-10	False	GridWorld	Pentagon	PartialObsDiscrete	Individual_Q	0.2	0.2	1000000	7
IndivQLearningVar2/418_41_8	none	True	-10	False	GridWorld	Pentagon	PartialObsDiscrete	Individual_Q	0.2	0.2	1000000	8
IndivQLearningVar2/419_41_9	none	True	-10	False	GridWorld	Pentagon	PartialObsDiscrete	Individual_Q	0.2	0.2	1000000	9
IndivQLearningVar2/420_42_0	none	False	0	False	GridWorld	Pentagon	PartialObsDiscrete	Individual_Q	0.2	0.01	1000000	0
IndivQLearningVar2/421_42_1	none	False	0	False	GridWorld	Pentagon	PartialObsDiscrete	Individual_Q	0.2	0.01	1000000	1
IndivQLearningVar2/422_42_2	none	False	0	False	GridWorld	Pentagon	PartialObsDiscrete	Individual_Q	0.2	0.01	1000000	2
IndivQLearningVar2/423_42_3	none	False	0	False	GridWorld	Pentagon	PartialObsDiscrete	Individual_Q	0.2	0.01	1000000	3
IndivQLearningVar2/424_42_4	none	False	0	False	GridWorld	Pentagon	PartialObsDiscrete	Individual_Q	0.2	0.01	1000000	4
IndivQLearningVar2/425_42_5	none	False	0	False	GridWorld	Pentagon	PartialObsDiscrete	Individual_Q	0.2	0.01	1000000	5
IndivQLearningVar2/426_42_6	none	False	0	False	GridWorld	Pentagon	PartialObsDiscrete	Individual_Q	0.2	0.01	1000000	6
IndivQLearningVar2/427_42_7	none	False	0	False	GridWorld	Pentagon	PartialObsDiscrete	Individual_Q	0.2	0.01	1000000	7
IndivQLearningVar2/428_42_8	none	False	0	False	GridWorld	Pentagon	PartialObsDiscrete	Individual_Q	0.2	0.01	1000000	8
IndivQLearningVar2/429_42_9	none	False	0	False	GridWorld	Pentagon	PartialObsDiscrete	Individual_Q	0.2	0.01	1000000	9
IndivQLearningVar2/430_43_0	none	True	-10	False	GridWorld	Pentagon	PartialObsDiscrete	Individual_Q	0.2	0.01	1000000	0
IndivQLearningVar2/431_43_1	none	True	-10	False	GridWorld	Pentagon	PartialObsDiscrete	Individual_Q	0.2	0.01	1000000	1
IndivQLearningVar2/432_43_2	none	True	-10	False	GridWorld	Pentagon	PartialObsDiscrete	Individual_Q	0.2	0.01	1000000	2
IndivQLearningVar2/433_43_3	none	True	-10	False	GridWorld	Pentagon	PartialObsDiscrete	Individual_Q	0.2	0.01	1000000	3
IndivQLearningVar2/434_43_4	none	True	-10	False	GridWorld	Pentagon	PartialObsDiscrete	Individual_Q	0.2	0.01	1000000	4
IndivQLearningVar2/435_43_5	none	True	-10	False	GridWorld	Pentagon	PartialObsDiscrete	Individual_Q	0.2	0.01	1000000	5
IndivQLearningVar2/436_43_6	none	True	-10	False	GridWorld	Pentagon	PartialObsDiscrete	Individual_Q	0.2	0.01	1000000	6
IndivQLearningVar2/437_43_7	none	True	-10	False	GridWorld	Pentagon	PartialObsDiscrete	Individual_Q	0.2	0.01	1000000	7
IndivQLearningVar2/438_43_8	none	True	-10	False	GridWorld	Pentagon	PartialObsDiscrete	Individual_Q	0.2	0.01	1000000	8
IndivQLearningVar2/439_43_9	none	True	-10	False	GridWorld	Pentagon	PartialObsDiscrete	Individual_Q	0.2	0.01	1000000	9
IndivQLearningVar2/440_44_0	none	False	0	False	GridWorld	Pentagon	FullObsDiscrete	Individual_Q	0.2	0.2	1000000	0
IndivQLearningVar2/441_44_1	none	False	0	False	GridWorld	Pentagon	FullObsDiscrete	Individual_Q	0.2	0.2	1000000	1
IndivQLearningVar2/442_44_2	none	False	0	False	GridWorld	Pentagon	FullObsDiscrete	Individual_Q	0.2	0.2	1000000	2
IndivQLearningVar2/443_44_3	none	False	0	False	GridWorld	Pentagon	FullObsDiscrete	Individual_Q	0.2	0.2	1000000	3
IndivQLearningVar2/444_44_4	none	False	0	False	GridWorld	Pentagon	FullObsDiscrete	Individual_Q	0.2	0.2	1000000	4
IndivQLearningVar2/445_44_5	none	False	0	False	GridWorld	Pentagon	FullObsDiscrete	Individual_Q	0.2	0.2	1000000	5
IndivQLearningVar2/446_44_6	none	False	0	False	GridWorld	Pentagon	FullObsDiscrete	Individual_Q	0.2	0.2	1000000	6
IndivQLearningVar2/447_44_7	none	False	0	False	GridWorld	Pentagon	FullObsDiscrete	Individual_Q	0.2	0.2	1000000	7
IndivQLearningVar2/448_44_8	none	False	0	False	GridWorld	Pentagon	FullObsDiscrete	Individual_Q	0.2	0.2	1000000	8
IndivQLearningVar2/449_44_9	none	False	0	False	GridWorld	Pentagon	FullObsDiscrete	Individual_Q	0.2	0.2	1000000	9
IndivQLearningVar2/450_45_0	none	True	-10	False	GridWorld	Pentagon	FullObsDiscrete	Individual_Q	0.2	0.2	1000000	0
IndivQLearningVar2/451_45_1	none	True	-10	False	GridWorld	Pentagon	FullObsDiscrete	Individual_Q	0.2	0.2	1000000	1
IndivQLearningVar2/452_45_2	none	True	-10	False	GridWorld	Pentagon	FullObsDiscrete	Individual_Q	0.2	0.2	1000000	2
IndivQLearningVar2/453_45_3	none	True	-10	False	GridWorld	Pentagon	FullObsDiscrete	Individual_Q	0.2	0.2	1000000	3
IndivQLearningVar2/454_45_4	none	True	-10	False	GridWorld	Pentagon	FullObsDiscrete	Individual_Q	0.2	0.2	1000000	4
IndivQLearningVar2/455_45_5	none	True	-10	False	GridWorld	Pentagon	FullObsDiscrete	Individual_Q	0.2	0.2	1000000	5
IndivQLearningVar2/456_45_6	none	True	-10	False	GridWorld	Pentagon	FullObsDiscrete	Individual_Q	0.2	0.2	1000000	6
IndivQLearningVar2/457_45_7	none	True	-10	False	GridWorld	Pentagon	FullObsDiscrete	Individual_Q	0.2	0.2	1000000	7
IndivQLearningVar2/458_45_8	none	True	-10	False	GridWorld	Pentagon	FullObsDiscrete	Individual_Q	0.2	0.2	1000000	8
IndivQLearningVar2/459_45_9	none	True	-10	False	GridWorld	Pentagon	FullObsDiscrete	Individual_Q	0.2	0.2	1000000	9
IndivQLearningVar2/460_46_0	none	False	0	False	GridWorld	Pentagon	FullObsDiscrete	Individual_Q	0.2	0.01	1000000	0
IndivQLearningVar2/461_46_1	none	False	0	False	GridWorld	Pentagon	FullObsDiscrete	Individual_Q	0.2	0.01	1000000	1
IndivQLearningVar2/462_46_2	none	False	0	False	GridWorld	Pentagon	FullObsDiscrete	Individual_Q	0.2	0.01	1000000	2
IndivQLearningVar2/463_46_3	none	False	0	False	GridWorld	Pentagon	FullObsDiscrete	Individual_Q	0.2	0.01	1000000	3
IndivQLearningVar2/464_46_4	none	False	0	False	GridWorld	Pentagon	FullObsDiscrete	Individual_Q	0.2	0.01	1000000	4
IndivQLearningVar2/465_46_5	none	False	0	False	GridWorld	Pentagon	FullObsDiscrete	Individual_Q	0.2	0.01	1000000	5
IndivQLearningVar2/466_46_6	none	False	0	False	GridWorld	Pentagon	FullObsDiscrete	Individual_Q	0.2	0.01	1000000	6
IndivQLearningVar2/467_46_7	none	False	0	False	GridWorld	Pentagon	FullObsDiscrete	Individual_Q	0.2	0.01	1000000	7
IndivQLearningVar2/468_46_8	none	False	0	False	GridWorld	Pentagon	FullObsDiscrete	Individual_Q	0.2	0.01	1000000	8
IndivQLearningVar2/469_46_9	none	False	0	False	GridWorld	Pentagon	FullObsDiscrete	Individual_Q	0.2	0.01	1000000	9
IndivQLearningVar2/470_47_0	none	True	-10	False	GridWorld	Pentagon	FullObsDiscrete	Individual_Q	0.2	0.01	1000000	0
IndivQLearningVar2/471_47_1	none	True	-10	False	GridWorld	Pentagon	FullObsDiscrete	Individual_Q	0.2	0.01	1000000	1
IndivQLearningVar2/472_47_2	none	True	-10	False	GridWorld	Pentagon	FullObsDiscrete	Individual_Q	0.2	0.01	1000000	2
IndivQLearningVar2/473_47_3	none	True	-10	False	GridWorld	Pentagon	FullObsDiscrete	Individual_Q	0.2	0.01	1000000	3
IndivQLearningVar2/474_47_4	none	True	-10	False	GridWorld	Pentagon	FullObsDiscrete	Individual_Q	0.2	0.01	1000000	4
IndivQLearningVar2/475_47_5	none	True	-10	False	GridWorld	Pentagon	FullObsDiscrete	Individual_Q	0.2	0.01	1000000	5
IndivQLearningVar2/476_47_6	none	True	-10	False	GridWorld	Pentagon	FullObsDiscrete	Individual_Q	0.2	0.01	1000000	6
IndivQLearningVar2/477_47_7	none	True	-10	False	GridWorld	Pentagon	FullObsDiscrete	Individual_Q	0.2	0.01	1000000	7
IndivQLearningVar2/478_47_8	none	True	-10	False	GridWorld	Pentagon	FullObsDiscrete	Individual_Q	0.2	0.01	1000000	8
IndivQLearningVar2/479_47_9	none	True	-10	False	GridWorld	Pentagon	FullObsDiscrete	Individual_Q	0.2	0.01	1000000	9
IndivQLearningVar2/480_48_0	centralized	False	0	True	GridWorld	ISR	PartialObsDiscrete	Individual_Q	0.2	0.2	1000000	0
IndivQLearningVar2/481_48_1	centralized	False	0	True	GridWorld	ISR	PartialObsDiscrete	Individual_Q	0.2	0.2	1000000	1
IndivQLearningVar2/482_48_2	centralized	False	0	True	GridWorld	ISR	PartialObsDiscrete	Individual_Q	0.2	0.2	1000000	2
IndivQLearningVar2/483_48_3	centralized	False	0	True	GridWorld	ISR	PartialObsDiscrete	Individual_Q	0.2	0.2	1000000	3
IndivQLearningVar2/484_48_4	centralized	False	0	True	GridWorld	ISR	PartialObsDiscrete	Individual_Q	0.2	0.2	1000000	4
IndivQLearningVar2/485_48_5	centralized	False	0	True	GridWorld	ISR	PartialObsDiscrete	Individual_Q	0.2	0.2	1000000	5
IndivQLearningVar2/486_48_6	centralized	False	0	True	GridWorld	ISR	PartialObsDiscrete	Individual_Q	0.2	0.2	1000000	6
IndivQLearningVar2/487_48_7	centralized	False	0	True	GridWorld	ISR	PartialObsDiscrete	Individual_Q	0.2	0.2	1000000	7
IndivQLearningVar2/488_48_8	centralized	False	0	True	GridWorld	ISR	PartialObsDiscrete	Individual_Q	0.2	0.2	1000000	8
IndivQLearningVar2/489_48_9	centralized	False	0	True	GridWorld	ISR	PartialObsDiscrete	Individual_Q	0.2	0.2	1000000	9
IndivQLearningVar2/490_49_0	centralized	True	-10	True	GridWorld	ISR	PartialObsDiscrete	Individual_Q	0.2	0.2	1000000	0
IndivQLearningVar2/491_49_1	centralized	True	-10	True	GridWorld	ISR	PartialObsDiscrete	Individual_Q	0.2	0.2	1000000	1
IndivQLearningVar2/492_49_2	centralized	True	-10	True	GridWorld	ISR	PartialObsDiscrete	Individual_Q	0.2	0.2	1000000	2
IndivQLearningVar2/493_49_3	centralized	True	-10	True	GridWorld	ISR	PartialObsDiscrete	Individual_Q	0.2	0.2	1000000	3
IndivQLearningVar2/494_49_4	centralized	True	-10	True	GridWorld	ISR	PartialObsDiscrete	Individual_Q	0.2	0.2	1000000	4
IndivQLearningVar2/495_49_5	centralized	True	-10	True	GridWorld	ISR	PartialObsDiscrete	Individual_Q	0.2	0.2	1000000	5
IndivQLearningVar2/496_49_6	centralized	True	-10	True	GridWorld	ISR	PartialObsDiscrete	Individual_Q	0.2	0.2	1000000	6
IndivQLearningVar2/497_49_7	centralized	True	-10	True	GridWorld	ISR	PartialObsDiscrete	Individual_Q	0.2	0.2	1000000	7
IndivQLearningVar2/498_49_8	centralized	True	-10	True	GridWorld	ISR	PartialObsDiscrete	Individual_Q	0.2	0.2	1000000	8
IndivQLearningVar2/499_49_9	centralized	True	-10	True	GridWorld	ISR	PartialObsDiscrete	Individual_Q	0.2	0.2	1000000	9
IndivQLearningVar2/500_50_0	centralized	False	0	True	GridWorld	ISR	PartialObsDiscrete	Individual_Q	0.2	0.01	1000000	0
IndivQLearningVar2/501_50_1	centralized	False	0	True	GridWorld	ISR	PartialObsDiscrete	Individual_Q	0.2	0.01	1000000	1
IndivQLearningVar2/502_50_2	centralized	False	0	True	GridWorld	ISR	PartialObsDiscrete	Individual_Q	0.2	0.01	1000000	2
IndivQLearningVar2/503_50_3	centralized	False	0	True	GridWorld	ISR	PartialObsDiscrete	Individual_Q	0.2	0.01	1000000	3
IndivQLearningVar2/504_50_4	centralized	False	0	True	GridWorld	ISR	PartialObsDiscrete	Individual_Q	0.2	0.01	1000000	4
IndivQLearningVar2/505_50_5	centralized	False	0	True	GridWorld	ISR	PartialObsDiscrete	Individual_Q	0.2	0.01	1000000	5
IndivQLearningVar2/506_50_6	centralized	False	0	True	GridWorld	ISR	PartialObsDiscrete	Individual_Q	0.2	0.01	1000000	6
IndivQLearningVar2/507_50_7	centralized	False	0	True	GridWorld	ISR	PartialObsDiscrete	Individual_Q	0.2	0.01	1000000	7
IndivQLearningVar2/508_50_8	centralized	False	0	True	GridWorld	ISR	PartialObsDiscrete	Individual_Q	0.2	0.01	1000000	8
IndivQLearningVar2/509_50_9	centralized	False	0	True	GridWorld	ISR	PartialObsDiscrete	Individual_Q	0.2	0.01	1000000	9
IndivQLearningVar2/510_51_0	centralized	True	-10	True	GridWorld	ISR	PartialObsDiscrete	Individual_Q	0.2	0.01	1000000	0
IndivQLearningVar2/511_51_1	centralized	True	-10	True	GridWorld	ISR	PartialObsDiscrete	Individual_Q	0.2	0.01	1000000	1
IndivQLearningVar2/512_51_2	centralized	True	-10	True	GridWorld	ISR	PartialObsDiscrete	Individual_Q	0.2	0.01	1000000	2
IndivQLearningVar2/513_51_3	centralized	True	-10	True	GridWorld	ISR	PartialObsDiscrete	Individual_Q	0.2	0.01	1000000	3
IndivQLearningVar2/514_51_4	centralized	True	-10	True	GridWorld	ISR	PartialObsDiscrete	Individual_Q	0.2	0.01	1000000	4
IndivQLearningVar2/515_51_5	centralized	True	-10	True	GridWorld	ISR	PartialObsDiscrete	Individual_Q	0.2	0.01	1000000	5
IndivQLearningVar2/516_51_6	centralized	True	-10	True	GridWorld	ISR	PartialObsDiscrete	Individual_Q	0.2	0.01	1000000	6
IndivQLearningVar2/517_51_7	centralized	True	-10	True	GridWorld	ISR	PartialObsDiscrete	Individual_Q	0.2	0.01	1000000	7
IndivQLearningVar2/518_51_8	centralized	True	-10	True	GridWorld	ISR	PartialObsDiscrete	Individual_Q	0.2	0.01	1000000	8
IndivQLearningVar2/519_51_9	centralized	True	-10	True	GridWorld	ISR	PartialObsDiscrete	Individual_Q	0.2	0.01	1000000	9
IndivQLearningVar2/520_52_0	centralized	False	0	True	GridWorld	ISR	FullObsDiscrete	Individual_Q	0.2	0.2	1000000	0
IndivQLearningVar2/521_52_1	centralized	False	0	True	GridWorld	ISR	FullObsDiscrete	Individual_Q	0.2	0.2	1000000	1
IndivQLearningVar2/522_52_2	centralized	False	0	True	GridWorld	ISR	FullObsDiscrete	Individual_Q	0.2	0.2	1000000	2
IndivQLearningVar2/523_52_3	centralized	False	0	True	GridWorld	ISR	FullObsDiscrete	Individual_Q	0.2	0.2	1000000	3
IndivQLearningVar2/524_52_4	centralized	False	0	True	GridWorld	ISR	FullObsDiscrete	Individual_Q	0.2	0.2	1000000	4
IndivQLearningVar2/525_52_5	centralized	False	0	True	GridWorld	ISR	FullObsDiscrete	Individual_Q	0.2	0.2	1000000	5
IndivQLearningVar2/526_52_6	centralized	False	0	True	GridWorld	ISR	FullObsDiscrete	Individual_Q	0.2	0.2	1000000	6
IndivQLearningVar2/527_52_7	centralized	False	0	True	GridWorld	ISR	FullObsDiscrete	Individual_Q	0.2	0.2	1000000	7
IndivQLearningVar2/528_52_8	centralized	False	0	True	GridWorld	ISR	FullObsDiscrete	Individual_Q	0.2	0.2	1000000	8
IndivQLearningVar2/529_52_9	centralized	False	0	True	GridWorld	ISR	FullObsDiscrete	Individual_Q	0.2	0.2	1000000	9
IndivQLearningVar2/530_53_0	centralized	True	-10	True	GridWorld	ISR	FullObsDiscrete	Individual_Q	0.2	0.2	1000000	0
IndivQLearningVar2/531_53_1	centralized	True	-10	True	GridWorld	ISR	FullObsDiscrete	Individual_Q	0.2	0.2	1000000	1
IndivQLearningVar2/532_53_2	centralized	True	-10	True	GridWorld	ISR	FullObsDiscrete	Individual_Q	0.2	0.2	1000000	2
IndivQLearningVar2/533_53_3	centralized	True	-10	True	GridWorld	ISR	FullObsDiscrete	Individual_Q	0.2	0.2	1000000	3
IndivQLearningVar2/534_53_4	centralized	True	-10	True	GridWorld	ISR	FullObsDiscrete	Individual_Q	0.2	0.2	1000000	4
IndivQLearningVar2/535_53_5	centralized	True	-10	True	GridWorld	ISR	FullObsDiscrete	Individual_Q	0.2	0.2	1000000	5
IndivQLearningVar2/536_53_6	centralized	True	-10	True	GridWorld	ISR	FullObsDiscrete	Individual_Q	0.2	0.2	1000000	6
IndivQLearningVar2/537_53_7	centralized	True	-10	True	GridWorld	ISR	FullObsDiscrete	Individual_Q	0.2	0.2	1000000	7
IndivQLearningVar2/538_53_8	centralized	True	-10	True	GridWorld	ISR	FullObsDiscrete	Individual_Q	0.2	0.2	1000000	8
IndivQLearningVar2/539_53_9	centralized	True	-10	True	GridWorld	ISR	FullObsDiscrete	Individual_Q	0.2	0.2	1000000	9
IndivQLearningVar2/540_54_0	centralized	False	0	True	GridWorld	ISR	FullObsDiscrete	Individual_Q	0.2	0.01	1000000	0
IndivQLearningVar2/541_54_1	centralized	False	0	True	GridWorld	ISR	FullObsDiscrete	Individual_Q	0.2	0.01	1000000	1
IndivQLearningVar2/542_54_2	centralized	False	0	True	GridWorld	ISR	FullObsDiscrete	Individual_Q	0.2	0.01	1000000	2
IndivQLearningVar2/543_54_3	centralized	False	0	True	GridWorld	ISR	FullObsDiscrete	Individual_Q	0.2	0.01	1000000	3
IndivQLearningVar2/544_54_4	centralized	False	0	True	GridWorld	ISR	FullObsDiscrete	Individual_Q	0.2	0.01	1000000	4
IndivQLearningVar2/545_54_5	centralized	False	0	True	GridWorld	ISR	FullObsDiscrete	Individual_Q	0.2	0.01	1000000	5
IndivQLearningVar2/546_54_6	centralized	False	0	True	GridWorld	ISR	FullObsDiscrete	Individual_Q	0.2	0.01	1000000	6
IndivQLearningVar2/547_54_7	centralized	False	0	True	GridWorld	ISR	FullObsDiscrete	Individual_Q	0.2	0.01	1000000	7
IndivQLearningVar2/548_54_8	centralized	False	0	True	GridWorld	ISR	FullObsDiscrete	Individual_Q	0.2	0.01	1000000	8
IndivQLearningVar2/549_54_9	centralized	False	0	True	GridWorld	ISR	FullObsDiscrete	Individual_Q	0.2	0.01	1000000	9
IndivQLearningVar2/550_55_0	centralized	True	-10	True	GridWorld	ISR	FullObsDiscrete	Individual_Q	0.2	0.01	1000000	0
IndivQLearningVar2/551_55_1	centralized	True	-10	True	GridWorld	ISR	FullObsDiscrete	Individual_Q	0.2	0.01	1000000	1
IndivQLearningVar2/552_55_2	centralized	True	-10	True	GridWorld	ISR	FullObsDiscrete	Individual_Q	0.2	0.01	1000000	2
IndivQLearningVar2/553_55_3	centralized	True	-10	True	GridWorld	ISR	FullObsDiscrete	Individual_Q	0.2	0.01	1000000	3
IndivQLearningVar2/554_55_4	centralized	True	-10	True	GridWorld	ISR	FullObsDiscrete	Individual_Q	0.2	0.01	1000000	4
IndivQLearningVar2/555_55_5	centralized	True	-10	True	GridWorld	ISR	FullObsDiscrete	Individual_Q	0.2	0.01	1000000	5
IndivQLearningVar2/556_55_6	centralized	True	-10	True	GridWorld	ISR	FullObsDiscrete	Individual_Q	0.2	0.01	1000000	6
IndivQLearningVar2/557_55_7	centralized	True	-10	True	GridWorld	ISR	FullObsDiscrete	Individual_Q	0.2	0.01	1000000	7
IndivQLearningVar2/558_55_8	centralized	True	-10	True	GridWorld	ISR	FullObsDiscrete	Individual_Q	0.2	0.01	1000000	8
IndivQLearningVar2/559_55_9	centralized	True	-10	True	GridWorld	ISR	FullObsDiscrete	Individual_Q	0.2	0.01	1000000	9
IndivQLearningVar2/560_56_0	decentralized	False	0	True	GridWorld	ISR	PartialObsDiscrete	Individual_Q	0.2	0.2	1000000	0
IndivQLearningVar2/561_56_1	decentralized	False	0	True	GridWorld	ISR	PartialObsDiscrete	Individual_Q	0.2	0.2	1000000	1
IndivQLearningVar2/562_56_2	decentralized	False	0	True	GridWorld	ISR	PartialObsDiscrete	Individual_Q	0.2	0.2	1000000	2
IndivQLearningVar2/563_56_3	decentralized	False	0	True	GridWorld	ISR	PartialObsDiscrete	Individual_Q	0.2	0.2	1000000	3
IndivQLearningVar2/564_56_4	decentralized	False	0	True	GridWorld	ISR	PartialObsDiscrete	Individual_Q	0.2	0.2	1000000	4
IndivQLearningVar2/565_56_5	decentralized	False	0	True	GridWorld	ISR	PartialObsDiscrete	Individual_Q	0.2	0.2	1000000	5
IndivQLearningVar2/566_56_6	decentralized	False	0	True	GridWorld	ISR	PartialObsDiscrete	Individual_Q	0.2	0.2	1000000	6
IndivQLearningVar2/567_56_7	decentralized	False	0	True	GridWorld	ISR	PartialObsDiscrete	Individual_Q	0.2	0.2	1000000	7
IndivQLearningVar2/568_56_8	decentralized	False	0	True	GridWorld	ISR	PartialObsDiscrete	Individual_Q	0.2	0.2	1000000	8
IndivQLearningVar2/569_56_9	decentralized	False	0	True	GridWorld	ISR	PartialObsDiscrete	Individual_Q	0.2	0.2	1000000	9
IndivQLearningVar2/570_57_0	decentralized	True	-10	True	GridWorld	ISR	PartialObsDiscrete	Individual_Q	0.2	0.2	1000000	0
IndivQLearningVar2/571_57_1	decentralized	True	-10	True	GridWorld	ISR	PartialObsDiscrete	Individual_Q	0.2	0.2	1000000	1
IndivQLearningVar2/572_57_2	decentralized	True	-10	True	GridWorld	ISR	PartialObsDiscrete	Individual_Q	0.2	0.2	1000000	2
IndivQLearningVar2/573_57_3	decentralized	True	-10	True	GridWorld	ISR	PartialObsDiscrete	Individual_Q	0.2	0.2	1000000	3
IndivQLearningVar2/574_57_4	decentralized	True	-10	True	GridWorld	ISR	PartialObsDiscrete	Individual_Q	0.2	0.2	1000000	4
IndivQLearningVar2/575_57_5	decentralized	True	-10	True	GridWorld	ISR	PartialObsDiscrete	Individual_Q	0.2	0.2	1000000	5
IndivQLearningVar2/576_57_6	decentralized	True	-10	True	GridWorld	ISR	PartialObsDiscrete	Individual_Q	0.2	0.2	1000000	6
IndivQLearningVar2/577_57_7	decentralized	True	-10	True	GridWorld	ISR	PartialObsDiscrete	Individual_Q	0.2	0.2	1000000	7
IndivQLearningVar2/578_57_8	decentralized	True	-10	True	GridWorld	ISR	PartialObsDiscrete	Individual_Q	0.2	0.2	1000000	8
IndivQLearningVar2/579_57_9	decentralized	True	-10	True	GridWorld	ISR	PartialObsDiscrete	Individual_Q	0.2	0.2	1000000	9
IndivQLearningVar2/580_58_0	decentralized	False	0	True	GridWorld	ISR	PartialObsDiscrete	Individual_Q	0.2	0.01	1000000	0
IndivQLearningVar2/581_58_1	decentralized	False	0	True	GridWorld	ISR	PartialObsDiscrete	Individual_Q	0.2	0.01	1000000	1
IndivQLearningVar2/582_58_2	decentralized	False	0	True	GridWorld	ISR	PartialObsDiscrete	Individual_Q	0.2	0.01	1000000	2
IndivQLearningVar2/583_58_3	decentralized	False	0	True	GridWorld	ISR	PartialObsDiscrete	Individual_Q	0.2	0.01	1000000	3
IndivQLearningVar2/584_58_4	decentralized	False	0	True	GridWorld	ISR	PartialObsDiscrete	Individual_Q	0.2	0.01	1000000	4
IndivQLearningVar2/585_58_5	decentralized	False	0	True	GridWorld	ISR	PartialObsDiscrete	Individual_Q	0.2	0.01	1000000	5
IndivQLearningVar2/586_58_6	decentralized	False	0	True	GridWorld	ISR	PartialObsDiscrete	Individual_Q	0.2	0.01	1000000	6
IndivQLearningVar2/587_58_7	decentralized	False	0	True	GridWorld	ISR	PartialObsDiscrete	Individual_Q	0.2	0.01	1000000	7
IndivQLearningVar2/588_58_8	decentralized	False	0	True	GridWorld	ISR	PartialObsDiscrete	Individual_Q	0.2	0.01	1000000	8
IndivQLearningVar2/589_58_9	decentralized	False	0	True	GridWorld	ISR	PartialObsDiscrete	Individual_Q	0.2	0.01	1000000	9
IndivQLearningVar2/590_59_0	decentralized	True	-10	True	GridWorld	ISR	PartialObsDiscrete	Individual_Q	0.2	0.01	1000000	0
IndivQLearningVar2/591_59_1	decentralized	True	-10	True	GridWorld	ISR	PartialObsDiscrete	Individual_Q	0.2	0.01	1000000	1
IndivQLearningVar2/592_59_2	decentralized	True	-10	True	GridWorld	ISR	PartialObsDiscrete	Individual_Q	0.2	0.01	1000000	2
IndivQLearningVar2/593_59_3	decentralized	True	-10	True	GridWorld	ISR	PartialObsDiscrete	Individual_Q	0.2	0.01	1000000	3
IndivQLearningVar2/594_59_4	decentralized	True	-10	True	GridWorld	ISR	PartialObsDiscrete	Individual_Q	0.2	0.01	1000000	4
IndivQLearningVar2/595_59_5	decentralized	True	-10	True	GridWorld	ISR	PartialObsDiscrete	Individual_Q	0.2	0.01	1000000	5
IndivQLearningVar2/596_59_6	decentralized	True	-10	True	GridWorld	ISR	PartialObsDiscrete	Individual_Q	0.2	0.01	1000000	6
IndivQLearningVar2/597_59_7	decentralized	True	-10	True	GridWorld	ISR	PartialObsDiscrete	Individual_Q	0.2	0.01	1000000	7
IndivQLearningVar2/598_59_8	decentralized	True	-10	True	GridWorld	ISR	PartialObsDiscrete	Individual_Q	0.2	0.01	1000000	8
IndivQLearningVar2/599_59_9	decentralized	True	-10	True	GridWorld	ISR	PartialObsDiscrete	Individual_Q	0.2	0.01	1000000	9
IndivQLearningVar2/600_60_0	decentralized	False	0	True	GridWorld	ISR	FullObsDiscrete	Individual_Q	0.2	0.2	1000000	0
IndivQLearningVar2/601_60_1	decentralized	False	0	True	GridWorld	ISR	FullObsDiscrete	Individual_Q	0.2	0.2	1000000	1
IndivQLearningVar2/602_60_2	decentralized	False	0	True	GridWorld	ISR	FullObsDiscrete	Individual_Q	0.2	0.2	1000000	2
IndivQLearningVar2/603_60_3	decentralized	False	0	True	GridWorld	ISR	FullObsDiscrete	Individual_Q	0.2	0.2	1000000	3
IndivQLearningVar2/604_60_4	decentralized	False	0	True	GridWorld	ISR	FullObsDiscrete	Individual_Q	0.2	0.2	1000000	4
IndivQLearningVar2/605_60_5	decentralized	False	0	True	GridWorld	ISR	FullObsDiscrete	Individual_Q	0.2	0.2	1000000	5
IndivQLearningVar2/606_60_6	decentralized	False	0	True	GridWorld	ISR	FullObsDiscrete	Individual_Q	0.2	0.2	1000000	6
IndivQLearningVar2/607_60_7	decentralized	False	0	True	GridWorld	ISR	FullObsDiscrete	Individual_Q	0.2	0.2	1000000	7
IndivQLearningVar2/608_60_8	decentralized	False	0	True	GridWorld	ISR	FullObsDiscrete	Individual_Q	0.2	0.2	1000000	8
IndivQLearningVar2/609_60_9	decentralized	False	0	True	GridWorld	ISR	FullObsDiscrete	Individual_Q	0.2	0.2	1000000	9
IndivQLearningVar2/610_61_0	decentralized	True	-10	True	GridWorld	ISR	FullObsDiscrete	Individual_Q	0.2	0.2	1000000	0
IndivQLearningVar2/611_61_1	decentralized	True	-10	True	GridWorld	ISR	FullObsDiscrete	Individual_Q	0.2	0.2	1000000	1
IndivQLearningVar2/612_61_2	decentralized	True	-10	True	GridWorld	ISR	FullObsDiscrete	Individual_Q	0.2	0.2	1000000	2
IndivQLearningVar2/613_61_3	decentralized	True	-10	True	GridWorld	ISR	FullObsDiscrete	Individual_Q	0.2	0.2	1000000	3
IndivQLearningVar2/614_61_4	decentralized	True	-10	True	GridWorld	ISR	FullObsDiscrete	Individual_Q	0.2	0.2	1000000	4
IndivQLearningVar2/615_61_5	decentralized	True	-10	True	GridWorld	ISR	FullObsDiscrete	Individual_Q	0.2	0.2	1000000	5
IndivQLearningVar2/616_61_6	decentralized	True	-10	True	GridWorld	ISR	FullObsDiscrete	Individual_Q	0.2	0.2	1000000	6
IndivQLearningVar2/617_61_7	decentralized	True	-10	True	GridWorld	ISR	FullObsDiscrete	Individual_Q	0.2	0.2	1000000	7
IndivQLearningVar2/618_61_8	decentralized	True	-10	True	GridWorld	ISR	FullObsDiscrete	Individual_Q	0.2	0.2	1000000	8
IndivQLearningVar2/619_61_9	decentralized	True	-10	True	GridWorld	ISR	FullObsDiscrete	Individual_Q	0.2	0.2	1000000	9
IndivQLearningVar2/620_62_0	decentralized	False	0	True	GridWorld	ISR	FullObsDiscrete	Individual_Q	0.2	0.01	1000000	0
IndivQLearningVar2/621_62_1	decentralized	False	0	True	GridWorld	ISR	FullObsDiscrete	Individual_Q	0.2	0.01	1000000	1
IndivQLearningVar2/622_62_2	decentralized	False	0	True	GridWorld	ISR	FullObsDiscrete	Individual_Q	0.2	0.01	1000000	2
IndivQLearningVar2/623_62_3	decentralized	False	0	True	GridWorld	ISR	FullObsDiscrete	Individual_Q	0.2	0.01	1000000	3
IndivQLearningVar2/624_62_4	decentralized	False	0	True	GridWorld	ISR	FullObsDiscrete	Individual_Q	0.2	0.01	1000000	4
IndivQLearningVar2/625_62_5	decentralized	False	0	True	GridWorld	ISR	FullObsDiscrete	Individual_Q	0.2	0.01	1000000	5
IndivQLearningVar2/626_62_6	decentralized	False	0	True	GridWorld	ISR	FullObsDiscrete	Individual_Q	0.2	0.01	1000000	6
IndivQLearningVar2/627_62_7	decentralized	False	0	True	GridWorld	ISR	FullObsDiscrete	Individual_Q	0.2	0.01	1000000	7
IndivQLearningVar2/628_62_8	decentralized	False	0	True	GridWorld	ISR	FullObsDiscrete	Individual_Q	0.2	0.01	1000000	8
IndivQLearningVar2/629_62_9	decentralized	False	0	True	GridWorld	ISR	FullObsDiscrete	Individual_Q	0.2	0.01	1000000	9
IndivQLearningVar2/630_63_0	decentralized	True	-10	True	GridWorld	ISR	FullObsDiscrete	Individual_Q	0.2	0.01	1000000	0
IndivQLearningVar2/631_63_1	decentralized	True	-10	True	GridWorld	ISR	FullObsDiscrete	Individual_Q	0.2	0.01	1000000	1
IndivQLearningVar2/632_63_2	decentralized	True	-10	True	GridWorld	ISR	FullObsDiscrete	Individual_Q	0.2	0.01	1000000	2
IndivQLearningVar2/633_63_3	decentralized	True	-10	True	GridWorld	ISR	FullObsDiscrete	Individual_Q	0.2	0.01	1000000	3
IndivQLearningVar2/634_63_4	decentralized	True	-10	True	GridWorld	ISR	FullObsDiscrete	Individual_Q	0.2	0.01	1000000	4
IndivQLearningVar2/635_63_5	decentralized	True	-10	True	GridWorld	ISR	FullObsDiscrete	Individual_Q	0.2	0.01	1000000	5
IndivQLearningVar2/636_63_6	decentralized	True	-10	True	GridWorld	ISR	FullObsDiscrete	Individual_Q	0.2	0.01	1000000	6
IndivQLearningVar2/637_63_7	decentralized	True	-10	True	GridWorld	ISR	FullObsDiscrete	Individual_Q	0.2	0.01	1000000	7
IndivQLearningVar2/638_63_8	decentralized	True	-10	True	GridWorld	ISR	FullObsDiscrete	Individual_Q	0.2	0.01	1000000	8
IndivQLearningVar2/639_63_9	decentralized	True	-10	True	GridWorld	ISR	FullObsDiscrete	Individual_Q	0.2	0.01	1000000	9
IndivQLearningVar2/640_64_0	none	False	0	True	GridWorld	ISR	PartialObsDiscrete	Individual_Q	0.2	0.2	1000000	0
IndivQLearningVar2/641_64_1	none	False	0	True	GridWorld	ISR	PartialObsDiscrete	Individual_Q	0.2	0.2	1000000	1
IndivQLearningVar2/642_64_2	none	False	0	True	GridWorld	ISR	PartialObsDiscrete	Individual_Q	0.2	0.2	1000000	2
IndivQLearningVar2/643_64_3	none	False	0	True	GridWorld	ISR	PartialObsDiscrete	Individual_Q	0.2	0.2	1000000	3
IndivQLearningVar2/644_64_4	none	False	0	True	GridWorld	ISR	PartialObsDiscrete	Individual_Q	0.2	0.2	1000000	4
IndivQLearningVar2/645_64_5	none	False	0	True	GridWorld	ISR	PartialObsDiscrete	Individual_Q	0.2	0.2	1000000	5
IndivQLearningVar2/646_64_6	none	False	0	True	GridWorld	ISR	PartialObsDiscrete	Individual_Q	0.2	0.2	1000000	6
IndivQLearningVar2/647_64_7	none	False	0	True	GridWorld	ISR	PartialObsDiscrete	Individual_Q	0.2	0.2	1000000	7
IndivQLearningVar2/648_64_8	none	False	0	True	GridWorld	ISR	PartialObsDiscrete	Individual_Q	0.2	0.2	1000000	8
IndivQLearningVar2/649_64_9	none	False	0	True	GridWorld	ISR	PartialObsDiscrete	Individual_Q	0.2	0.2	1000000	9
IndivQLearningVar2/650_65_0	none	True	-10	True	GridWorld	ISR	PartialObsDiscrete	Individual_Q	0.2	0.2	1000000	0
IndivQLearningVar2/651_65_1	none	True	-10	True	GridWorld	ISR	PartialObsDiscrete	Individual_Q	0.2	0.2	1000000	1
IndivQLearningVar2/652_65_2	none	True	-10	True	GridWorld	ISR	PartialObsDiscrete	Individual_Q	0.2	0.2	1000000	2
IndivQLearningVar2/653_65_3	none	True	-10	True	GridWorld	ISR	PartialObsDiscrete	Individual_Q	0.2	0.2	1000000	3
IndivQLearningVar2/654_65_4	none	True	-10	True	GridWorld	ISR	PartialObsDiscrete	Individual_Q	0.2	0.2	1000000	4
IndivQLearningVar2/655_65_5	none	True	-10	True	GridWorld	ISR	PartialObsDiscrete	Individual_Q	0.2	0.2	1000000	5
IndivQLearningVar2/656_65_6	none	True	-10	True	GridWorld	ISR	PartialObsDiscrete	Individual_Q	0.2	0.2	1000000	6
IndivQLearningVar2/657_65_7	none	True	-10	True	GridWorld	ISR	PartialObsDiscrete	Individual_Q	0.2	0.2	1000000	7
IndivQLearningVar2/658_65_8	none	True	-10	True	GridWorld	ISR	PartialObsDiscrete	Individual_Q	0.2	0.2	1000000	8
IndivQLearningVar2/659_65_9	none	True	-10	True	GridWorld	ISR	PartialObsDiscrete	Individual_Q	0.2	0.2	1000000	9
IndivQLearningVar2/660_66_0	none	False	0	True	GridWorld	ISR	PartialObsDiscrete	Individual_Q	0.2	0.01	1000000	0
IndivQLearningVar2/661_66_1	none	False	0	True	GridWorld	ISR	PartialObsDiscrete	Individual_Q	0.2	0.01	1000000	1
IndivQLearningVar2/662_66_2	none	False	0	True	GridWorld	ISR	PartialObsDiscrete	Individual_Q	0.2	0.01	1000000	2
IndivQLearningVar2/663_66_3	none	False	0	True	GridWorld	ISR	PartialObsDiscrete	Individual_Q	0.2	0.01	1000000	3
IndivQLearningVar2/664_66_4	none	False	0	True	GridWorld	ISR	PartialObsDiscrete	Individual_Q	0.2	0.01	1000000	4
IndivQLearningVar2/665_66_5	none	False	0	True	GridWorld	ISR	PartialObsDiscrete	Individual_Q	0.2	0.01	1000000	5
IndivQLearningVar2/666_66_6	none	False	0	True	GridWorld	ISR	PartialObsDiscrete	Individual_Q	0.2	0.01	1000000	6
IndivQLearningVar2/667_66_7	none	False	0	True	GridWorld	ISR	PartialObsDiscrete	Individual_Q	0.2	0.01	1000000	7
IndivQLearningVar2/668_66_8	none	False	0	True	GridWorld	ISR	PartialObsDiscrete	Individual_Q	0.2	0.01	1000000	8
IndivQLearningVar2/669_66_9	none	False	0	True	GridWorld	ISR	PartialObsDiscrete	Individual_Q	0.2	0.01	1000000	9
IndivQLearningVar2/670_67_0	none	True	-10	True	GridWorld	ISR	PartialObsDiscrete	Individual_Q	0.2	0.01	1000000	0
IndivQLearningVar2/671_67_1	none	True	-10	True	GridWorld	ISR	PartialObsDiscrete	Individual_Q	0.2	0.01	1000000	1
IndivQLearningVar2/672_67_2	none	True	-10	True	GridWorld	ISR	PartialObsDiscrete	Individual_Q	0.2	0.01	1000000	2
IndivQLearningVar2/673_67_3	none	True	-10	True	GridWorld	ISR	PartialObsDiscrete	Individual_Q	0.2	0.01	1000000	3
IndivQLearningVar2/674_67_4	none	True	-10	True	GridWorld	ISR	PartialObsDiscrete	Individual_Q	0.2	0.01	1000000	4
IndivQLearningVar2/675_67_5	none	True	-10	True	GridWorld	ISR	PartialObsDiscrete	Individual_Q	0.2	0.01	1000000	5
IndivQLearningVar2/676_67_6	none	True	-10	True	GridWorld	ISR	PartialObsDiscrete	Individual_Q	0.2	0.01	1000000	6
IndivQLearningVar2/677_67_7	none	True	-10	True	GridWorld	ISR	PartialObsDiscrete	Individual_Q	0.2	0.01	1000000	7
IndivQLearningVar2/678_67_8	none	True	-10	True	GridWorld	ISR	PartialObsDiscrete	Individual_Q	0.2	0.01	1000000	8
IndivQLearningVar2/679_67_9	none	True	-10	True	GridWorld	ISR	PartialObsDiscrete	Individual_Q	0.2	0.01	1000000	9
IndivQLearningVar2/680_68_0	none	False	0	True	GridWorld	ISR	FullObsDiscrete	Individual_Q	0.2	0.2	1000000	0
IndivQLearningVar2/681_68_1	none	False	0	True	GridWorld	ISR	FullObsDiscrete	Individual_Q	0.2	0.2	1000000	1
IndivQLearningVar2/682_68_2	none	False	0	True	GridWorld	ISR	FullObsDiscrete	Individual_Q	0.2	0.2	1000000	2
IndivQLearningVar2/683_68_3	none	False	0	True	GridWorld	ISR	FullObsDiscrete	Individual_Q	0.2	0.2	1000000	3
IndivQLearningVar2/684_68_4	none	False	0	True	GridWorld	ISR	FullObsDiscrete	Individual_Q	0.2	0.2	1000000	4
IndivQLearningVar2/685_68_5	none	False	0	True	GridWorld	ISR	FullObsDiscrete	Individual_Q	0.2	0.2	1000000	5
IndivQLearningVar2/686_68_6	none	False	0	True	GridWorld	ISR	FullObsDiscrete	Individual_Q	0.2	0.2	1000000	6
IndivQLearningVar2/687_68_7	none	False	0	True	GridWorld	ISR	FullObsDiscrete	Individual_Q	0.2	0.2	1000000	7
IndivQLearningVar2/688_68_8	none	False	0	True	GridWorld	ISR	FullObsDiscrete	Individual_Q	0.2	0.2	1000000	8
IndivQLearningVar2/689_68_9	none	False	0	True	GridWorld	ISR	FullObsDiscrete	Individual_Q	0.2	0.2	1000000	9
IndivQLearningVar2/690_69_0	none	True	-10	True	GridWorld	ISR	FullObsDiscrete	Individual_Q	0.2	0.2	1000000	0
IndivQLearningVar2/691_69_1	none	True	-10	True	GridWorld	ISR	FullObsDiscrete	Individual_Q	0.2	0.2	1000000	1
IndivQLearningVar2/692_69_2	none	True	-10	True	GridWorld	ISR	FullObsDiscrete	Individual_Q	0.2	0.2	1000000	2
IndivQLearningVar2/693_69_3	none	True	-10	True	GridWorld	ISR	FullObsDiscrete	Individual_Q	0.2	0.2	1000000	3
IndivQLearningVar2/694_69_4	none	True	-10	True	GridWorld	ISR	FullObsDiscrete	Individual_Q	0.2	0.2	1000000	4
IndivQLearningVar2/695_69_5	none	True	-10	True	GridWorld	ISR	FullObsDiscrete	Individual_Q	0.2	0.2	1000000	5
IndivQLearningVar2/696_69_6	none	True	-10	True	GridWorld	ISR	FullObsDiscrete	Individual_Q	0.2	0.2	1000000	6
IndivQLearningVar2/697_69_7	none	True	-10	True	GridWorld	ISR	FullObsDiscrete	Individual_Q	0.2	0.2	1000000	7
IndivQLearningVar2/698_69_8	none	True	-10	True	GridWorld	ISR	FullObsDiscrete	Individual_Q	0.2	0.2	1000000	8
IndivQLearningVar2/699_69_9	none	True	-10	True	GridWorld	ISR	FullObsDiscrete	Individual_Q	0.2	0.2	1000000	9
IndivQLearningVar2/700_70_0	none	False	0	True	GridWorld	ISR	FullObsDiscrete	Individual_Q	0.2	0.01	1000000	0
IndivQLearningVar2/701_70_1	none	False	0	True	GridWorld	ISR	FullObsDiscrete	Individual_Q	0.2	0.01	1000000	1
IndivQLearningVar2/702_70_2	none	False	0	True	GridWorld	ISR	FullObsDiscrete	Individual_Q	0.2	0.01	1000000	2
IndivQLearningVar2/703_70_3	none	False	0	True	GridWorld	ISR	FullObsDiscrete	Individual_Q	0.2	0.01	1000000	3
IndivQLearningVar2/704_70_4	none	False	0	True	GridWorld	ISR	FullObsDiscrete	Individual_Q	0.2	0.01	1000000	4
IndivQLearningVar2/705_70_5	none	False	0	True	GridWorld	ISR	FullObsDiscrete	Individual_Q	0.2	0.01	1000000	5
IndivQLearningVar2/706_70_6	none	False	0	True	GridWorld	ISR	FullObsDiscrete	Individual_Q	0.2	0.01	1000000	6
IndivQLearningVar2/707_70_7	none	False	0	True	GridWorld	ISR	FullObsDiscrete	Individual_Q	0.2	0.01	1000000	7
IndivQLearningVar2/708_70_8	none	False	0	True	GridWorld	ISR	FullObsDiscrete	Individual_Q	0.2	0.01	1000000	8
IndivQLearningVar2/709_70_9	none	False	0	True	GridWorld	ISR	FullObsDiscrete	Individual_Q	0.2	0.01	1000000	9
IndivQLearningVar2/710_71_0	none	True	-10	True	GridWorld	ISR	FullObsDiscrete	Individual_Q	0.2	0.01	1000000	0
IndivQLearningVar2/711_71_1	none	True	-10	True	GridWorld	ISR	FullObsDiscrete	Individual_Q	0.2	0.01	1000000	1
IndivQLearningVar2/712_71_2	none	True	-10	True	GridWorld	ISR	FullObsDiscrete	Individual_Q	0.2	0.01	1000000	2
IndivQLearningVar2/713_71_3	none	True	-10	True	GridWorld	ISR	FullObsDiscrete	Individual_Q	0.2	0.01	1000000	3
IndivQLearningVar2/714_71_4	none	True	-10	True	GridWorld	ISR	FullObsDiscrete	Individual_Q	0.2	0.01	1000000	4
IndivQLearningVar2/715_71_5	none	True	-10	True	GridWorld	ISR	FullObsDiscrete	Individual_Q	0.2	0.01	1000000	5
IndivQLearningVar2/716_71_6	none	True	-10	True	GridWorld	ISR	FullObsDiscrete	Individual_Q	0.2	0.01	1000000	6
IndivQLearningVar2/717_71_7	none	True	-10	True	GridWorld	ISR	FullObsDiscrete	Individual_Q	0.2	0.01	1000000	7
IndivQLearningVar2/718_71_8	none	True	-10	True	GridWorld	ISR	FullObsDiscrete	Individual_Q	0.2	0.01	1000000	8
IndivQLearningVar2/719_71_9	none	True	-10	True	GridWorld	ISR	FullObsDiscrete	Individual_Q	0.2	0.01	1000000	9
IndivQLearningVar2/720_72_0	centralized	False	0	False	GridWorld	ISR	PartialObsDiscrete	Individual_Q	0.2	0.2	1000000	0
IndivQLearningVar2/721_72_1	centralized	False	0	False	GridWorld	ISR	PartialObsDiscrete	Individual_Q	0.2	0.2	1000000	1
IndivQLearningVar2/722_72_2	centralized	False	0	False	GridWorld	ISR	PartialObsDiscrete	Individual_Q	0.2	0.2	1000000	2
IndivQLearningVar2/723_72_3	centralized	False	0	False	GridWorld	ISR	PartialObsDiscrete	Individual_Q	0.2	0.2	1000000	3
IndivQLearningVar2/724_72_4	centralized	False	0	False	GridWorld	ISR	PartialObsDiscrete	Individual_Q	0.2	0.2	1000000	4
IndivQLearningVar2/725_72_5	centralized	False	0	False	GridWorld	ISR	PartialObsDiscrete	Individual_Q	0.2	0.2	1000000	5
IndivQLearningVar2/726_72_6	centralized	False	0	False	GridWorld	ISR	PartialObsDiscrete	Individual_Q	0.2	0.2	1000000	6
IndivQLearningVar2/727_72_7	centralized	False	0	False	GridWorld	ISR	PartialObsDiscrete	Individual_Q	0.2	0.2	1000000	7
IndivQLearningVar2/728_72_8	centralized	False	0	False	GridWorld	ISR	PartialObsDiscrete	Individual_Q	0.2	0.2	1000000	8
IndivQLearningVar2/729_72_9	centralized	False	0	False	GridWorld	ISR	PartialObsDiscrete	Individual_Q	0.2	0.2	1000000	9
IndivQLearningVar2/730_73_0	centralized	True	-10	False	GridWorld	ISR	PartialObsDiscrete	Individual_Q	0.2	0.2	1000000	0
IndivQLearningVar2/731_73_1	centralized	True	-10	False	GridWorld	ISR	PartialObsDiscrete	Individual_Q	0.2	0.2	1000000	1
IndivQLearningVar2/732_73_2	centralized	True	-10	False	GridWorld	ISR	PartialObsDiscrete	Individual_Q	0.2	0.2	1000000	2
IndivQLearningVar2/733_73_3	centralized	True	-10	False	GridWorld	ISR	PartialObsDiscrete	Individual_Q	0.2	0.2	1000000	3
IndivQLearningVar2/734_73_4	centralized	True	-10	False	GridWorld	ISR	PartialObsDiscrete	Individual_Q	0.2	0.2	1000000	4
IndivQLearningVar2/735_73_5	centralized	True	-10	False	GridWorld	ISR	PartialObsDiscrete	Individual_Q	0.2	0.2	1000000	5
IndivQLearningVar2/736_73_6	centralized	True	-10	False	GridWorld	ISR	PartialObsDiscrete	Individual_Q	0.2	0.2	1000000	6
IndivQLearningVar2/737_73_7	centralized	True	-10	False	GridWorld	ISR	PartialObsDiscrete	Individual_Q	0.2	0.2	1000000	7
IndivQLearningVar2/738_73_8	centralized	True	-10	False	GridWorld	ISR	PartialObsDiscrete	Individual_Q	0.2	0.2	1000000	8
IndivQLearningVar2/739_73_9	centralized	True	-10	False	GridWorld	ISR	PartialObsDiscrete	Individual_Q	0.2	0.2	1000000	9
IndivQLearningVar2/740_74_0	centralized	False	0	False	GridWorld	ISR	PartialObsDiscrete	Individual_Q	0.2	0.01	1000000	0
IndivQLearningVar2/741_74_1	centralized	False	0	False	GridWorld	ISR	PartialObsDiscrete	Individual_Q	0.2	0.01	1000000	1
IndivQLearningVar2/742_74_2	centralized	False	0	False	GridWorld	ISR	PartialObsDiscrete	Individual_Q	0.2	0.01	1000000	2
IndivQLearningVar2/743_74_3	centralized	False	0	False	GridWorld	ISR	PartialObsDiscrete	Individual_Q	0.2	0.01	1000000	3
IndivQLearningVar2/744_74_4	centralized	False	0	False	GridWorld	ISR	PartialObsDiscrete	Individual_Q	0.2	0.01	1000000	4
IndivQLearningVar2/745_74_5	centralized	False	0	False	GridWorld	ISR	PartialObsDiscrete	Individual_Q	0.2	0.01	1000000	5
IndivQLearningVar2/746_74_6	centralized	False	0	False	GridWorld	ISR	PartialObsDiscrete	Individual_Q	0.2	0.01	1000000	6
IndivQLearningVar2/747_74_7	centralized	False	0	False	GridWorld	ISR	PartialObsDiscrete	Individual_Q	0.2	0.01	1000000	7
IndivQLearningVar2/748_74_8	centralized	False	0	False	GridWorld	ISR	PartialObsDiscrete	Individual_Q	0.2	0.01	1000000	8
IndivQLearningVar2/749_74_9	centralized	False	0	False	GridWorld	ISR	PartialObsDiscrete	Individual_Q	0.2	0.01	1000000	9
IndivQLearningVar2/750_75_0	centralized	True	-10	False	GridWorld	ISR	PartialObsDiscrete	Individual_Q	0.2	0.01	1000000	0
IndivQLearningVar2/751_75_1	centralized	True	-10	False	GridWorld	ISR	PartialObsDiscrete	Individual_Q	0.2	0.01	1000000	1
IndivQLearningVar2/752_75_2	centralized	True	-10	False	GridWorld	ISR	PartialObsDiscrete	Individual_Q	0.2	0.01	1000000	2
IndivQLearningVar2/753_75_3	centralized	True	-10	False	GridWorld	ISR	PartialObsDiscrete	Individual_Q	0.2	0.01	1000000	3
IndivQLearningVar2/754_75_4	centralized	True	-10	False	GridWorld	ISR	PartialObsDiscrete	Individual_Q	0.2	0.01	1000000	4
IndivQLearningVar2/755_75_5	centralized	True	-10	False	GridWorld	ISR	PartialObsDiscrete	Individual_Q	0.2	0.01	1000000	5
IndivQLearningVar2/756_75_6	centralized	True	-10	False	GridWorld	ISR	PartialObsDiscrete	Individual_Q	0.2	0.01	1000000	6
IndivQLearningVar2/757_75_7	centralized	True	-10	False	GridWorld	ISR	PartialObsDiscrete	Individual_Q	0.2	0.01	1000000	7
IndivQLearningVar2/758_75_8	centralized	True	-10	False	GridWorld	ISR	PartialObsDiscrete	Individual_Q	0.2	0.01	1000000	8
IndivQLearningVar2/759_75_9	centralized	True	-10	False	GridWorld	ISR	PartialObsDiscrete	Individual_Q	0.2	0.01	1000000	9
IndivQLearningVar2/760_76_0	centralized	False	0	False	GridWorld	ISR	FullObsDiscrete	Individual_Q	0.2	0.2	1000000	0
IndivQLearningVar2/761_76_1	centralized	False	0	False	GridWorld	ISR	FullObsDiscrete	Individual_Q	0.2	0.2	1000000	1
IndivQLearningVar2/762_76_2	centralized	False	0	False	GridWorld	ISR	FullObsDiscrete	Individual_Q	0.2	0.2	1000000	2
IndivQLearningVar2/763_76_3	centralized	False	0	False	GridWorld	ISR	FullObsDiscrete	Individual_Q	0.2	0.2	1000000	3
IndivQLearningVar2/764_76_4	centralized	False	0	False	GridWorld	ISR	FullObsDiscrete	Individual_Q	0.2	0.2	1000000	4
IndivQLearningVar2/765_76_5	centralized	False	0	False	GridWorld	ISR	FullObsDiscrete	Individual_Q	0.2	0.2	1000000	5
IndivQLearningVar2/766_76_6	centralized	False	0	False	GridWorld	ISR	FullObsDiscrete	Individual_Q	0.2	0.2	1000000	6
IndivQLearningVar2/767_76_7	centralized	False	0	False	GridWorld	ISR	FullObsDiscrete	Individual_Q	0.2	0.2	1000000	7
IndivQLearningVar2/768_76_8	centralized	False	0	False	GridWorld	ISR	FullObsDiscrete	Individual_Q	0.2	0.2	1000000	8
IndivQLearningVar2/769_76_9	centralized	False	0	False	GridWorld	ISR	FullObsDiscrete	Individual_Q	0.2	0.2	1000000	9
IndivQLearningVar2/770_77_0	centralized	True	-10	False	GridWorld	ISR	FullObsDiscrete	Individual_Q	0.2	0.2	1000000	0
IndivQLearningVar2/771_77_1	centralized	True	-10	False	GridWorld	ISR	FullObsDiscrete	Individual_Q	0.2	0.2	1000000	1
IndivQLearningVar2/772_77_2	centralized	True	-10	False	GridWorld	ISR	FullObsDiscrete	Individual_Q	0.2	0.2	1000000	2
IndivQLearningVar2/773_77_3	centralized	True	-10	False	GridWorld	ISR	FullObsDiscrete	Individual_Q	0.2	0.2	1000000	3
IndivQLearningVar2/774_77_4	centralized	True	-10	False	GridWorld	ISR	FullObsDiscrete	Individual_Q	0.2	0.2	1000000	4
IndivQLearningVar2/775_77_5	centralized	True	-10	False	GridWorld	ISR	FullObsDiscrete	Individual_Q	0.2	0.2	1000000	5
IndivQLearningVar2/776_77_6	centralized	True	-10	False	GridWorld	ISR	FullObsDiscrete	Individual_Q	0.2	0.2	1000000	6
IndivQLearningVar2/777_77_7	centralized	True	-10	False	GridWorld	ISR	FullObsDiscrete	Individual_Q	0.2	0.2	1000000	7
IndivQLearningVar2/778_77_8	centralized	True	-10	False	GridWorld	ISR	FullObsDiscrete	Individual_Q	0.2	0.2	1000000	8
IndivQLearningVar2/779_77_9	centralized	True	-10	False	GridWorld	ISR	FullObsDiscrete	Individual_Q	0.2	0.2	1000000	9
IndivQLearningVar2/780_78_0	centralized	False	0	False	GridWorld	ISR	FullObsDiscrete	Individual_Q	0.2	0.01	1000000	0
IndivQLearningVar2/781_78_1	centralized	False	0	False	GridWorld	ISR	FullObsDiscrete	Individual_Q	0.2	0.01	1000000	1
IndivQLearningVar2/782_78_2	centralized	False	0	False	GridWorld	ISR	FullObsDiscrete	Individual_Q	0.2	0.01	1000000	2
IndivQLearningVar2/783_78_3	centralized	False	0	False	GridWorld	ISR	FullObsDiscrete	Individual_Q	0.2	0.01	1000000	3
IndivQLearningVar2/784_78_4	centralized	False	0	False	GridWorld	ISR	FullObsDiscrete	Individual_Q	0.2	0.01	1000000	4
IndivQLearningVar2/785_78_5	centralized	False	0	False	GridWorld	ISR	FullObsDiscrete	Individual_Q	0.2	0.01	1000000	5
IndivQLearningVar2/786_78_6	centralized	False	0	False	GridWorld	ISR	FullObsDiscrete	Individual_Q	0.2	0.01	1000000	6
IndivQLearningVar2/787_78_7	centralized	False	0	False	GridWorld	ISR	FullObsDiscrete	Individual_Q	0.2	0.01	1000000	7
IndivQLearningVar2/788_78_8	centralized	False	0	False	GridWorld	ISR	FullObsDiscrete	Individual_Q	0.2	0.01	1000000	8
IndivQLearningVar2/789_78_9	centralized	False	0	False	GridWorld	ISR	FullObsDiscrete	Individual_Q	0.2	0.01	1000000	9
IndivQLearningVar2/790_79_0	centralized	True	-10	False	GridWorld	ISR	FullObsDiscrete	Individual_Q	0.2	0.01	1000000	0
IndivQLearningVar2/791_79_1	centralized	True	-10	False	GridWorld	ISR	FullObsDiscrete	Individual_Q	0.2	0.01	1000000	1
IndivQLearningVar2/792_79_2	centralized	True	-10	False	GridWorld	ISR	FullObsDiscrete	Individual_Q	0.2	0.01	1000000	2
IndivQLearningVar2/793_79_3	centralized	True	-10	False	GridWorld	ISR	FullObsDiscrete	Individual_Q	0.2	0.01	1000000	3
IndivQLearningVar2/794_79_4	centralized	True	-10	False	GridWorld	ISR	FullObsDiscrete	Individual_Q	0.2	0.01	1000000	4
IndivQLearningVar2/795_79_5	centralized	True	-10	False	GridWorld	ISR	FullObsDiscrete	Individual_Q	0.2	0.01	1000000	5
IndivQLearningVar2/796_79_6	centralized	True	-10	False	GridWorld	ISR	FullObsDiscrete	Individual_Q	0.2	0.01	1000000	6
IndivQLearningVar2/797_79_7	centralized	True	-10	False	GridWorld	ISR	FullObsDiscrete	Individual_Q	0.2	0.01	1000000	7
IndivQLearningVar2/798_79_8	centralized	True	-10	False	GridWorld	ISR	FullObsDiscrete	Individual_Q	0.2	0.01	1000000	8
IndivQLearningVar2/799_79_9	centralized	True	-10	False	GridWorld	ISR	FullObsDiscrete	Individual_Q	0.2	0.01	1000000	9
IndivQLearningVar2/800_80_0	decentralized	False	0	False	GridWorld	ISR	PartialObsDiscrete	Individual_Q	0.2	0.2	1000000	0
IndivQLearningVar2/801_80_1	decentralized	False	0	False	GridWorld	ISR	PartialObsDiscrete	Individual_Q	0.2	0.2	1000000	1
IndivQLearningVar2/802_80_2	decentralized	False	0	False	GridWorld	ISR	PartialObsDiscrete	Individual_Q	0.2	0.2	1000000	2
IndivQLearningVar2/803_80_3	decentralized	False	0	False	GridWorld	ISR	PartialObsDiscrete	Individual_Q	0.2	0.2	1000000	3
IndivQLearningVar2/804_80_4	decentralized	False	0	False	GridWorld	ISR	PartialObsDiscrete	Individual_Q	0.2	0.2	1000000	4
IndivQLearningVar2/805_80_5	decentralized	False	0	False	GridWorld	ISR	PartialObsDiscrete	Individual_Q	0.2	0.2	1000000	5
IndivQLearningVar2/806_80_6	decentralized	False	0	False	GridWorld	ISR	PartialObsDiscrete	Individual_Q	0.2	0.2	1000000	6
IndivQLearningVar2/807_80_7	decentralized	False	0	False	GridWorld	ISR	PartialObsDiscrete	Individual_Q	0.2	0.2	1000000	7
IndivQLearningVar2/808_80_8	decentralized	False	0	False	GridWorld	ISR	PartialObsDiscrete	Individual_Q	0.2	0.2	1000000	8
IndivQLearningVar2/809_80_9	decentralized	False	0	False	GridWorld	ISR	PartialObsDiscrete	Individual_Q	0.2	0.2	1000000	9
IndivQLearningVar2/810_81_0	decentralized	True	-10	False	GridWorld	ISR	PartialObsDiscrete	Individual_Q	0.2	0.2	1000000	0
IndivQLearningVar2/811_81_1	decentralized	True	-10	False	GridWorld	ISR	PartialObsDiscrete	Individual_Q	0.2	0.2	1000000	1
IndivQLearningVar2/812_81_2	decentralized	True	-10	False	GridWorld	ISR	PartialObsDiscrete	Individual_Q	0.2	0.2	1000000	2
IndivQLearningVar2/813_81_3	decentralized	True	-10	False	GridWorld	ISR	PartialObsDiscrete	Individual_Q	0.2	0.2	1000000	3
IndivQLearningVar2/814_81_4	decentralized	True	-10	False	GridWorld	ISR	PartialObsDiscrete	Individual_Q	0.2	0.2	1000000	4
IndivQLearningVar2/815_81_5	decentralized	True	-10	False	GridWorld	ISR	PartialObsDiscrete	Individual_Q	0.2	0.2	1000000	5
IndivQLearningVar2/816_81_6	decentralized	True	-10	False	GridWorld	ISR	PartialObsDiscrete	Individual_Q	0.2	0.2	1000000	6
IndivQLearningVar2/817_81_7	decentralized	True	-10	False	GridWorld	ISR	PartialObsDiscrete	Individual_Q	0.2	0.2	1000000	7
IndivQLearningVar2/818_81_8	decentralized	True	-10	False	GridWorld	ISR	PartialObsDiscrete	Individual_Q	0.2	0.2	1000000	8
IndivQLearningVar2/819_81_9	decentralized	True	-10	False	GridWorld	ISR	PartialObsDiscrete	Individual_Q	0.2	0.2	1000000	9
IndivQLearningVar2/820_82_0	decentralized	False	0	False	GridWorld	ISR	PartialObsDiscrete	Individual_Q	0.2	0.01	1000000	0
IndivQLearningVar2/821_82_1	decentralized	False	0	False	GridWorld	ISR	PartialObsDiscrete	Individual_Q	0.2	0.01	1000000	1
IndivQLearningVar2/822_82_2	decentralized	False	0	False	GridWorld	ISR	PartialObsDiscrete	Individual_Q	0.2	0.01	1000000	2
IndivQLearningVar2/823_82_3	decentralized	False	0	False	GridWorld	ISR	PartialObsDiscrete	Individual_Q	0.2	0.01	1000000	3
IndivQLearningVar2/824_82_4	decentralized	False	0	False	GridWorld	ISR	PartialObsDiscrete	Individual_Q	0.2	0.01	1000000	4
IndivQLearningVar2/825_82_5	decentralized	False	0	False	GridWorld	ISR	PartialObsDiscrete	Individual_Q	0.2	0.01	1000000	5
IndivQLearningVar2/826_82_6	decentralized	False	0	False	GridWorld	ISR	PartialObsDiscrete	Individual_Q	0.2	0.01	1000000	6
IndivQLearningVar2/827_82_7	decentralized	False	0	False	GridWorld	ISR	PartialObsDiscrete	Individual_Q	0.2	0.01	1000000	7
IndivQLearningVar2/828_82_8	decentralized	False	0	False	GridWorld	ISR	PartialObsDiscrete	Individual_Q	0.2	0.01	1000000	8
IndivQLearningVar2/829_82_9	decentralized	False	0	False	GridWorld	ISR	PartialObsDiscrete	Individual_Q	0.2	0.01	1000000	9
IndivQLearningVar2/830_83_0	decentralized	True	-10	False	GridWorld	ISR	PartialObsDiscrete	Individual_Q	0.2	0.01	1000000	0
IndivQLearningVar2/831_83_1	decentralized	True	-10	False	GridWorld	ISR	PartialObsDiscrete	Individual_Q	0.2	0.01	1000000	1
IndivQLearningVar2/832_83_2	decentralized	True	-10	False	GridWorld	ISR	PartialObsDiscrete	Individual_Q	0.2	0.01	1000000	2
IndivQLearningVar2/833_83_3	decentralized	True	-10	False	GridWorld	ISR	PartialObsDiscrete	Individual_Q	0.2	0.01	1000000	3
IndivQLearningVar2/834_83_4	decentralized	True	-10	False	GridWorld	ISR	PartialObsDiscrete	Individual_Q	0.2	0.01	1000000	4
IndivQLearningVar2/835_83_5	decentralized	True	-10	False	GridWorld	ISR	PartialObsDiscrete	Individual_Q	0.2	0.01	1000000	5
IndivQLearningVar2/836_83_6	decentralized	True	-10	False	GridWorld	ISR	PartialObsDiscrete	Individual_Q	0.2	0.01	1000000	6
IndivQLearningVar2/837_83_7	decentralized	True	-10	False	GridWorld	ISR	PartialObsDiscrete	Individual_Q	0.2	0.01	1000000	7
IndivQLearningVar2/838_83_8	decentralized	True	-10	False	GridWorld	ISR	PartialObsDiscrete	Individual_Q	0.2	0.01	1000000	8
IndivQLearningVar2/839_83_9	decentralized	True	-10	False	GridWorld	ISR	PartialObsDiscrete	Individual_Q	0.2	0.01	1000000	9
IndivQLearningVar2/840_84_0	decentralized	False	0	False	GridWorld	ISR	FullObsDiscrete	Individual_Q	0.2	0.2	1000000	0
IndivQLearningVar2/841_84_1	decentralized	False	0	False	GridWorld	ISR	FullObsDiscrete	Individual_Q	0.2	0.2	1000000	1
IndivQLearningVar2/842_84_2	decentralized	False	0	False	GridWorld	ISR	FullObsDiscrete	Individual_Q	0.2	0.2	1000000	2
IndivQLearningVar2/843_84_3	decentralized	False	0	False	GridWorld	ISR	FullObsDiscrete	Individual_Q	0.2	0.2	1000000	3
IndivQLearningVar2/844_84_4	decentralized	False	0	False	GridWorld	ISR	FullObsDiscrete	Individual_Q	0.2	0.2	1000000	4
IndivQLearningVar2/845_84_5	decentralized	False	0	False	GridWorld	ISR	FullObsDiscrete	Individual_Q	0.2	0.2	1000000	5
IndivQLearningVar2/846_84_6	decentralized	False	0	False	GridWorld	ISR	FullObsDiscrete	Individual_Q	0.2	0.2	1000000	6
IndivQLearningVar2/847_84_7	decentralized	False	0	False	GridWorld	ISR	FullObsDiscrete	Individual_Q	0.2	0.2	1000000	7
IndivQLearningVar2/848_84_8	decentralized	False	0	False	GridWorld	ISR	FullObsDiscrete	Individual_Q	0.2	0.2	1000000	8
IndivQLearningVar2/849_84_9	decentralized	False	0	False	GridWorld	ISR	FullObsDiscrete	Individual_Q	0.2	0.2	1000000	9
IndivQLearningVar2/850_85_0	decentralized	True	-10	False	GridWorld	ISR	FullObsDiscrete	Individual_Q	0.2	0.2	1000000	0
IndivQLearningVar2/851_85_1	decentralized	True	-10	False	GridWorld	ISR	FullObsDiscrete	Individual_Q	0.2	0.2	1000000	1
IndivQLearningVar2/852_85_2	decentralized	True	-10	False	GridWorld	ISR	FullObsDiscrete	Individual_Q	0.2	0.2	1000000	2
IndivQLearningVar2/853_85_3	decentralized	True	-10	False	GridWorld	ISR	FullObsDiscrete	Individual_Q	0.2	0.2	1000000	3
IndivQLearningVar2/854_85_4	decentralized	True	-10	False	GridWorld	ISR	FullObsDiscrete	Individual_Q	0.2	0.2	1000000	4
IndivQLearningVar2/855_85_5	decentralized	True	-10	False	GridWorld	ISR	FullObsDiscrete	Individual_Q	0.2	0.2	1000000	5
IndivQLearningVar2/856_85_6	decentralized	True	-10	False	GridWorld	ISR	FullObsDiscrete	Individual_Q	0.2	0.2	1000000	6
IndivQLearningVar2/857_85_7	decentralized	True	-10	False	GridWorld	ISR	FullObsDiscrete	Individual_Q	0.2	0.2	1000000	7
IndivQLearningVar2/858_85_8	decentralized	True	-10	False	GridWorld	ISR	FullObsDiscrete	Individual_Q	0.2	0.2	1000000	8
IndivQLearningVar2/859_85_9	decentralized	True	-10	False	GridWorld	ISR	FullObsDiscrete	Individual_Q	0.2	0.2	1000000	9
IndivQLearningVar2/860_86_0	decentralized	False	0	False	GridWorld	ISR	FullObsDiscrete	Individual_Q	0.2	0.01	1000000	0
IndivQLearningVar2/861_86_1	decentralized	False	0	False	GridWorld	ISR	FullObsDiscrete	Individual_Q	0.2	0.01	1000000	1
IndivQLearningVar2/862_86_2	decentralized	False	0	False	GridWorld	ISR	FullObsDiscrete	Individual_Q	0.2	0.01	1000000	2
IndivQLearningVar2/863_86_3	decentralized	False	0	False	GridWorld	ISR	FullObsDiscrete	Individual_Q	0.2	0.01	1000000	3
IndivQLearningVar2/864_86_4	decentralized	False	0	False	GridWorld	ISR	FullObsDiscrete	Individual_Q	0.2	0.01	1000000	4
IndivQLearningVar2/865_86_5	decentralized	False	0	False	GridWorld	ISR	FullObsDiscrete	Individual_Q	0.2	0.01	1000000	5
IndivQLearningVar2/866_86_6	decentralized	False	0	False	GridWorld	ISR	FullObsDiscrete	Individual_Q	0.2	0.01	1000000	6
IndivQLearningVar2/867_86_7	decentralized	False	0	False	GridWorld	ISR	FullObsDiscrete	Individual_Q	0.2	0.01	1000000	7
IndivQLearningVar2/868_86_8	decentralized	False	0	False	GridWorld	ISR	FullObsDiscrete	Individual_Q	0.2	0.01	1000000	8
IndivQLearningVar2/869_86_9	decentralized	False	0	False	GridWorld	ISR	FullObsDiscrete	Individual_Q	0.2	0.01	1000000	9
IndivQLearningVar2/870_87_0	decentralized	True	-10	False	GridWorld	ISR	FullObsDiscrete	Individual_Q	0.2	0.01	1000000	0
IndivQLearningVar2/871_87_1	decentralized	True	-10	False	GridWorld	ISR	FullObsDiscrete	Individual_Q	0.2	0.01	1000000	1
IndivQLearningVar2/872_87_2	decentralized	True	-10	False	GridWorld	ISR	FullObsDiscrete	Individual_Q	0.2	0.01	1000000	2
IndivQLearningVar2/873_87_3	decentralized	True	-10	False	GridWorld	ISR	FullObsDiscrete	Individual_Q	0.2	0.01	1000000	3
IndivQLearningVar2/874_87_4	decentralized	True	-10	False	GridWorld	ISR	FullObsDiscrete	Individual_Q	0.2	0.01	1000000	4
IndivQLearningVar2/875_87_5	decentralized	True	-10	False	GridWorld	ISR	FullObsDiscrete	Individual_Q	0.2	0.01	1000000	5
IndivQLearningVar2/876_87_6	decentralized	True	-10	False	GridWorld	ISR	FullObsDiscrete	Individual_Q	0.2	0.01	1000000	6
IndivQLearningVar2/877_87_7	decentralized	True	-10	False	GridWorld	ISR	FullObsDiscrete	Individual_Q	0.2	0.01	1000000	7
IndivQLearningVar2/878_87_8	decentralized	True	-10	False	GridWorld	ISR	FullObsDiscrete	Individual_Q	0.2	0.01	1000000	8
IndivQLearningVar2/879_87_9	decentralized	True	-10	False	GridWorld	ISR	FullObsDiscrete	Individual_Q	0.2	0.01	1000000	9
IndivQLearningVar2/880_88_0	none	False	0	False	GridWorld	ISR	PartialObsDiscrete	Individual_Q	0.2	0.2	1000000	0
IndivQLearningVar2/881_88_1	none	False	0	False	GridWorld	ISR	PartialObsDiscrete	Individual_Q	0.2	0.2	1000000	1
IndivQLearningVar2/882_88_2	none	False	0	False	GridWorld	ISR	PartialObsDiscrete	Individual_Q	0.2	0.2	1000000	2
IndivQLearningVar2/883_88_3	none	False	0	False	GridWorld	ISR	PartialObsDiscrete	Individual_Q	0.2	0.2	1000000	3
IndivQLearningVar2/884_88_4	none	False	0	False	GridWorld	ISR	PartialObsDiscrete	Individual_Q	0.2	0.2	1000000	4
IndivQLearningVar2/885_88_5	none	False	0	False	GridWorld	ISR	PartialObsDiscrete	Individual_Q	0.2	0.2	1000000	5
IndivQLearningVar2/886_88_6	none	False	0	False	GridWorld	ISR	PartialObsDiscrete	Individual_Q	0.2	0.2	1000000	6
IndivQLearningVar2/887_88_7	none	False	0	False	GridWorld	ISR	PartialObsDiscrete	Individual_Q	0.2	0.2	1000000	7
IndivQLearningVar2/888_88_8	none	False	0	False	GridWorld	ISR	PartialObsDiscrete	Individual_Q	0.2	0.2	1000000	8
IndivQLearningVar2/889_88_9	none	False	0	False	GridWorld	ISR	PartialObsDiscrete	Individual_Q	0.2	0.2	1000000	9
IndivQLearningVar2/890_89_0	none	True	-10	False	GridWorld	ISR	PartialObsDiscrete	Individual_Q	0.2	0.2	1000000	0
IndivQLearningVar2/891_89_1	none	True	-10	False	GridWorld	ISR	PartialObsDiscrete	Individual_Q	0.2	0.2	1000000	1
IndivQLearningVar2/892_89_2	none	True	-10	False	GridWorld	ISR	PartialObsDiscrete	Individual_Q	0.2	0.2	1000000	2
IndivQLearningVar2/893_89_3	none	True	-10	False	GridWorld	ISR	PartialObsDiscrete	Individual_Q	0.2	0.2	1000000	3
IndivQLearningVar2/894_89_4	none	True	-10	False	GridWorld	ISR	PartialObsDiscrete	Individual_Q	0.2	0.2	1000000	4
IndivQLearningVar2/895_89_5	none	True	-10	False	GridWorld	ISR	PartialObsDiscrete	Individual_Q	0.2	0.2	1000000	5
IndivQLearningVar2/896_89_6	none	True	-10	False	GridWorld	ISR	PartialObsDiscrete	Individual_Q	0.2	0.2	1000000	6
IndivQLearningVar2/897_89_7	none	True	-10	False	GridWorld	ISR	PartialObsDiscrete	Individual_Q	0.2	0.2	1000000	7
IndivQLearningVar2/898_89_8	none	True	-10	False	GridWorld	ISR	PartialObsDiscrete	Individual_Q	0.2	0.2	1000000	8
IndivQLearningVar2/899_89_9	none	True	-10	False	GridWorld	ISR	PartialObsDiscrete	Individual_Q	0.2	0.2	1000000	9
IndivQLearningVar2/900_90_0	none	False	0	False	GridWorld	ISR	PartialObsDiscrete	Individual_Q	0.2	0.01	1000000	0
IndivQLearningVar2/901_90_1	none	False	0	False	GridWorld	ISR	PartialObsDiscrete	Individual_Q	0.2	0.01	1000000	1
IndivQLearningVar2/902_90_2	none	False	0	False	GridWorld	ISR	PartialObsDiscrete	Individual_Q	0.2	0.01	1000000	2
IndivQLearningVar2/903_90_3	none	False	0	False	GridWorld	ISR	PartialObsDiscrete	Individual_Q	0.2	0.01	1000000	3
IndivQLearningVar2/904_90_4	none	False	0	False	GridWorld	ISR	PartialObsDiscrete	Individual_Q	0.2	0.01	1000000	4
IndivQLearningVar2/905_90_5	none	False	0	False	GridWorld	ISR	PartialObsDiscrete	Individual_Q	0.2	0.01	1000000	5
IndivQLearningVar2/906_90_6	none	False	0	False	GridWorld	ISR	PartialObsDiscrete	Individual_Q	0.2	0.01	1000000	6
IndivQLearningVar2/907_90_7	none	False	0	False	GridWorld	ISR	PartialObsDiscrete	Individual_Q	0.2	0.01	1000000	7
IndivQLearningVar2/908_90_8	none	False	0	False	GridWorld	ISR	PartialObsDiscrete	Individual_Q	0.2	0.01	1000000	8
IndivQLearningVar2/909_90_9	none	False	0	False	GridWorld	ISR	PartialObsDiscrete	Individual_Q	0.2	0.01	1000000	9
IndivQLearningVar2/910_91_0	none	True	-10	False	GridWorld	ISR	PartialObsDiscrete	Individual_Q	0.2	0.01	1000000	0
IndivQLearningVar2/911_91_1	none	True	-10	False	GridWorld	ISR	PartialObsDiscrete	Individual_Q	0.2	0.01	1000000	1
IndivQLearningVar2/912_91_2	none	True	-10	False	GridWorld	ISR	PartialObsDiscrete	Individual_Q	0.2	0.01	1000000	2
IndivQLearningVar2/913_91_3	none	True	-10	False	GridWorld	ISR	PartialObsDiscrete	Individual_Q	0.2	0.01	1000000	3
IndivQLearningVar2/914_91_4	none	True	-10	False	GridWorld	ISR	PartialObsDiscrete	Individual_Q	0.2	0.01	1000000	4
IndivQLearningVar2/915_91_5	none	True	-10	False	GridWorld	ISR	PartialObsDiscrete	Individual_Q	0.2	0.01	1000000	5
IndivQLearningVar2/916_91_6	none	True	-10	False	GridWorld	ISR	PartialObsDiscrete	Individual_Q	0.2	0.01	1000000	6
IndivQLearningVar2/917_91_7	none	True	-10	False	GridWorld	ISR	PartialObsDiscrete	Individual_Q	0.2	0.01	1000000	7
IndivQLearningVar2/918_91_8	none	True	-10	False	GridWorld	ISR	PartialObsDiscrete	Individual_Q	0.2	0.01	1000000	8
IndivQLearningVar2/919_91_9	none	True	-10	False	GridWorld	ISR	PartialObsDiscrete	Individual_Q	0.2	0.01	1000000	9
IndivQLearningVar2/920_92_0	none	False	0	False	GridWorld	ISR	FullObsDiscrete	Individual_Q	0.2	0.2	1000000	0
IndivQLearningVar2/921_92_1	none	False	0	False	GridWorld	ISR	FullObsDiscrete	Individual_Q	0.2	0.2	1000000	1
IndivQLearningVar2/922_92_2	none	False	0	False	GridWorld	ISR	FullObsDiscrete	Individual_Q	0.2	0.2	1000000	2
IndivQLearningVar2/923_92_3	none	False	0	False	GridWorld	ISR	FullObsDiscrete	Individual_Q	0.2	0.2	1000000	3
IndivQLearningVar2/924_92_4	none	False	0	False	GridWorld	ISR	FullObsDiscrete	Individual_Q	0.2	0.2	1000000	4
IndivQLearningVar2/925_92_5	none	False	0	False	GridWorld	ISR	FullObsDiscrete	Individual_Q	0.2	0.2	1000000	5
IndivQLearningVar2/926_92_6	none	False	0	False	GridWorld	ISR	FullObsDiscrete	Individual_Q	0.2	0.2	1000000	6
IndivQLearningVar2/927_92_7	none	False	0	False	GridWorld	ISR	FullObsDiscrete	Individual_Q	0.2	0.2	1000000	7
IndivQLearningVar2/928_92_8	none	False	0	False	GridWorld	ISR	FullObsDiscrete	Individual_Q	0.2	0.2	1000000	8
IndivQLearningVar2/929_92_9	none	False	0	False	GridWorld	ISR	FullObsDiscrete	Individual_Q	0.2	0.2	1000000	9
IndivQLearningVar2/930_93_0	none	True	-10	False	GridWorld	ISR	FullObsDiscrete	Individual_Q	0.2	0.2	1000000	0
IndivQLearningVar2/931_93_1	none	True	-10	False	GridWorld	ISR	FullObsDiscrete	Individual_Q	0.2	0.2	1000000	1
IndivQLearningVar2/932_93_2	none	True	-10	False	GridWorld	ISR	FullObsDiscrete	Individual_Q	0.2	0.2	1000000	2
IndivQLearningVar2/933_93_3	none	True	-10	False	GridWorld	ISR	FullObsDiscrete	Individual_Q	0.2	0.2	1000000	3
IndivQLearningVar2/934_93_4	none	True	-10	False	GridWorld	ISR	FullObsDiscrete	Individual_Q	0.2	0.2	1000000	4
IndivQLearningVar2/935_93_5	none	True	-10	False	GridWorld	ISR	FullObsDiscrete	Individual_Q	0.2	0.2	1000000	5
IndivQLearningVar2/936_93_6	none	True	-10	False	GridWorld	ISR	FullObsDiscrete	Individual_Q	0.2	0.2	1000000	6
IndivQLearningVar2/937_93_7	none	True	-10	False	GridWorld	ISR	FullObsDiscrete	Individual_Q	0.2	0.2	1000000	7
IndivQLearningVar2/938_93_8	none	True	-10	False	GridWorld	ISR	FullObsDiscrete	Individual_Q	0.2	0.2	1000000	8
IndivQLearningVar2/939_93_9	none	True	-10	False	GridWorld	ISR	FullObsDiscrete	Individual_Q	0.2	0.2	1000000	9
IndivQLearningVar2/940_94_0	none	False	0	False	GridWorld	ISR	FullObsDiscrete	Individual_Q	0.2	0.01	1000000	0
IndivQLearningVar2/941_94_1	none	False	0	False	GridWorld	ISR	FullObsDiscrete	Individual_Q	0.2	0.01	1000000	1
IndivQLearningVar2/942_94_2	none	False	0	False	GridWorld	ISR	FullObsDiscrete	Individual_Q	0.2	0.01	1000000	2
IndivQLearningVar2/943_94_3	none	False	0	False	GridWorld	ISR	FullObsDiscrete	Individual_Q	0.2	0.01	1000000	3
IndivQLearningVar2/944_94_4	none	False	0	False	GridWorld	ISR	FullObsDiscrete	Individual_Q	0.2	0.01	1000000	4
IndivQLearningVar2/945_94_5	none	False	0	False	GridWorld	ISR	FullObsDiscrete	Individual_Q	0.2	0.01	1000000	5
IndivQLearningVar2/946_94_6	none	False	0	False	GridWorld	ISR	FullObsDiscrete	Individual_Q	0.2	0.01	1000000	6
IndivQLearningVar2/947_94_7	none	False	0	False	GridWorld	ISR	FullObsDiscrete	Individual_Q	0.2	0.01	1000000	7
IndivQLearningVar2/948_94_8	none	False	0	False	GridWorld	ISR	FullObsDiscrete	Individual_Q	0.2	0.01	1000000	8
IndivQLearningVar2/949_94_9	none	False	0	False	GridWorld	ISR	FullObsDiscrete	Individual_Q	0.2	0.01	1000000	9
IndivQLearningVar2/950_95_0	none	True	-10	False	GridWorld	ISR	FullObsDiscrete	Individual_Q	0.2	0.01	1000000	0
IndivQLearningVar2/951_95_1	none	True	-10	False	GridWorld	ISR	FullObsDiscrete	Individual_Q	0.2	0.01	1000000	1
IndivQLearningVar2/952_95_2	none	True	-10	False	GridWorld	ISR	FullObsDiscrete	Individual_Q	0.2	0.01	1000000	2
IndivQLearningVar2/953_95_3	none	True	-10	False	GridWorld	ISR	FullObsDiscrete	Individual_Q	0.2	0.01	1000000	3
IndivQLearningVar2/954_95_4	none	True	-10	False	GridWorld	ISR	FullObsDiscrete	Individual_Q	0.2	0.01	1000000	4
IndivQLearningVar2/955_95_5	none	True	-10	False	GridWorld	ISR	FullObsDiscrete	Individual_Q	0.2	0.01	1000000	5
IndivQLearningVar2/956_95_6	none	True	-10	False	GridWorld	ISR	FullObsDiscrete	Individual_Q	0.2	0.01	1000000	6
IndivQLearningVar2/957_95_7	none	True	-10	False	GridWorld	ISR	FullObsDiscrete	Individual_Q	0.2	0.01	1000000	7
IndivQLearningVar2/958_95_8	none	True	-10	False	GridWorld	ISR	FullObsDiscrete	Individual_Q	0.2	0.01	1000000	8
IndivQLearningVar2/959_95_9	none	True	-10	False	GridWorld	ISR	FullObsDiscrete	Individual_Q	0.2	0.01	1000000	9
IndivQLearningVar2/960_96_0	centralized	False	0	True	GridWorld	SUNY	PartialObsDiscrete	Individual_Q	0.2	0.2	1000000	0
IndivQLearningVar2/961_96_1	centralized	False	0	True	GridWorld	SUNY	PartialObsDiscrete	Individual_Q	0.2	0.2	1000000	1
IndivQLearningVar2/962_96_2	centralized	False	0	True	GridWorld	SUNY	PartialObsDiscrete	Individual_Q	0.2	0.2	1000000	2
IndivQLearningVar2/963_96_3	centralized	False	0	True	GridWorld	SUNY	PartialObsDiscrete	Individual_Q	0.2	0.2	1000000	3
IndivQLearningVar2/964_96_4	centralized	False	0	True	GridWorld	SUNY	PartialObsDiscrete	Individual_Q	0.2	0.2	1000000	4
IndivQLearningVar2/965_96_5	centralized	False	0	True	GridWorld	SUNY	PartialObsDiscrete	Individual_Q	0.2	0.2	1000000	5
IndivQLearningVar2/966_96_6	centralized	False	0	True	GridWorld	SUNY	PartialObsDiscrete	Individual_Q	0.2	0.2	1000000	6
IndivQLearningVar2/967_96_7	centralized	False	0	True	GridWorld	SUNY	PartialObsDiscrete	Individual_Q	0.2	0.2	1000000	7
IndivQLearningVar2/968_96_8	centralized	False	0	True	GridWorld	SUNY	PartialObsDiscrete	Individual_Q	0.2	0.2	1000000	8
IndivQLearningVar2/969_96_9	centralized	False	0	True	GridWorld	SUNY	PartialObsDiscrete	Individual_Q	0.2	0.2	1000000	9
IndivQLearningVar2/970_97_0	centralized	True	-10	True	GridWorld	SUNY	PartialObsDiscrete	Individual_Q	0.2	0.2	1000000	0
IndivQLearningVar2/971_97_1	centralized	True	-10	True	GridWorld	SUNY	PartialObsDiscrete	Individual_Q	0.2	0.2	1000000	1
IndivQLearningVar2/972_97_2	centralized	True	-10	True	GridWorld	SUNY	PartialObsDiscrete	Individual_Q	0.2	0.2	1000000	2
IndivQLearningVar2/973_97_3	centralized	True	-10	True	GridWorld	SUNY	PartialObsDiscrete	Individual_Q	0.2	0.2	1000000	3
IndivQLearningVar2/974_97_4	centralized	True	-10	True	GridWorld	SUNY	PartialObsDiscrete	Individual_Q	0.2	0.2	1000000	4
IndivQLearningVar2/975_97_5	centralized	True	-10	True	GridWorld	SUNY	PartialObsDiscrete	Individual_Q	0.2	0.2	1000000	5
IndivQLearningVar2/976_97_6	centralized	True	-10	True	GridWorld	SUNY	PartialObsDiscrete	Individual_Q	0.2	0.2	1000000	6
IndivQLearningVar2/977_97_7	centralized	True	-10	True	GridWorld	SUNY	PartialObsDiscrete	Individual_Q	0.2	0.2	1000000	7
IndivQLearningVar2/978_97_8	centralized	True	-10	True	GridWorld	SUNY	PartialObsDiscrete	Individual_Q	0.2	0.2	1000000	8
IndivQLearningVar2/979_97_9	centralized	True	-10	True	GridWorld	SUNY	PartialObsDiscrete	Individual_Q	0.2	0.2	1000000	9
IndivQLearningVar2/980_98_0	centralized	False	0	True	GridWorld	SUNY	PartialObsDiscrete	Individual_Q	0.2	0.01	1000000	0
IndivQLearningVar2/981_98_1	centralized	False	0	True	GridWorld	SUNY	PartialObsDiscrete	Individual_Q	0.2	0.01	1000000	1
IndivQLearningVar2/982_98_2	centralized	False	0	True	GridWorld	SUNY	PartialObsDiscrete	Individual_Q	0.2	0.01	1000000	2
IndivQLearningVar2/983_98_3	centralized	False	0	True	GridWorld	SUNY	PartialObsDiscrete	Individual_Q	0.2	0.01	1000000	3
IndivQLearningVar2/984_98_4	centralized	False	0	True	GridWorld	SUNY	PartialObsDiscrete	Individual_Q	0.2	0.01	1000000	4
IndivQLearningVar2/985_98_5	centralized	False	0	True	GridWorld	SUNY	PartialObsDiscrete	Individual_Q	0.2	0.01	1000000	5
IndivQLearningVar2/986_98_6	centralized	False	0	True	GridWorld	SUNY	PartialObsDiscrete	Individual_Q	0.2	0.01	1000000	6
IndivQLearningVar2/987_98_7	centralized	False	0	True	GridWorld	SUNY	PartialObsDiscrete	Individual_Q	0.2	0.01	1000000	7
IndivQLearningVar2/988_98_8	centralized	False	0	True	GridWorld	SUNY	PartialObsDiscrete	Individual_Q	0.2	0.01	1000000	8
IndivQLearningVar2/989_98_9	centralized	False	0	True	GridWorld	SUNY	PartialObsDiscrete	Individual_Q	0.2	0.01	1000000	9
IndivQLearningVar2/990_99_0	centralized	True	-10	True	GridWorld	SUNY	PartialObsDiscrete	Individual_Q	0.2	0.01	1000000	0
IndivQLearningVar2/991_99_1	centralized	True	-10	True	GridWorld	SUNY	PartialObsDiscrete	Individual_Q	0.2	0.01	1000000	1
IndivQLearningVar2/992_99_2	centralized	True	-10	True	GridWorld	SUNY	PartialObsDiscrete	Individual_Q	0.2	0.01	1000000	2
IndivQLearningVar2/993_99_3	centralized	True	-10	True	GridWorld	SUNY	PartialObsDiscrete	Individual_Q	0.2	0.01	1000000	3
IndivQLearningVar2/994_99_4	centralized	True	-10	True	GridWorld	SUNY	PartialObsDiscrete	Individual_Q	0.2	0.01	1000000	4
IndivQLearningVar2/995_99_5	centralized	True	-10	True	GridWorld	SUNY	PartialObsDiscrete	Individual_Q	0.2	0.01	1000000	5
IndivQLearningVar2/996_99_6	centralized	True	-10	True	GridWorld	SUNY	PartialObsDiscrete	Individual_Q	0.2	0.01	1000000	6
IndivQLearningVar2/997_99_7	centralized	True	-10	True	GridWorld	SUNY	PartialObsDiscrete	Individual_Q	0.2	0.01	1000000	7
IndivQLearningVar2/998_99_8	centralized	True	-10	True	GridWorld	SUNY	PartialObsDiscrete	Individual_Q	0.2	0.01	1000000	8
IndivQLearningVar2/999_99_9	centralized	True	-10	True	GridWorld	SUNY	PartialObsDiscrete	Individual_Q	0.2	0.01	1000000	9
IndivQLearningVar2/1000_100_0	centralized	False	0	True	GridWorld	SUNY	FullObsDiscrete	Individual_Q	0.2	0.2	1000000	0
IndivQLearningVar2/1001_100_1	centralized	False	0	True	GridWorld	SUNY	FullObsDiscrete	Individual_Q	0.2	0.2	1000000	1
IndivQLearningVar2/1002_100_2	centralized	False	0	True	GridWorld	SUNY	FullObsDiscrete	Individual_Q	0.2	0.2	1000000	2
IndivQLearningVar2/1003_100_3	centralized	False	0	True	GridWorld	SUNY	FullObsDiscrete	Individual_Q	0.2	0.2	1000000	3
IndivQLearningVar2/1004_100_4	centralized	False	0	True	GridWorld	SUNY	FullObsDiscrete	Individual_Q	0.2	0.2	1000000	4
IndivQLearningVar2/1005_100_5	centralized	False	0	True	GridWorld	SUNY	FullObsDiscrete	Individual_Q	0.2	0.2	1000000	5
IndivQLearningVar2/1006_100_6	centralized	False	0	True	GridWorld	SUNY	FullObsDiscrete	Individual_Q	0.2	0.2	1000000	6
IndivQLearningVar2/1007_100_7	centralized	False	0	True	GridWorld	SUNY	FullObsDiscrete	Individual_Q	0.2	0.2	1000000	7
IndivQLearningVar2/1008_100_8	centralized	False	0	True	GridWorld	SUNY	FullObsDiscrete	Individual_Q	0.2	0.2	1000000	8
IndivQLearningVar2/1009_100_9	centralized	False	0	True	GridWorld	SUNY	FullObsDiscrete	Individual_Q	0.2	0.2	1000000	9
IndivQLearningVar2/1010_101_0	centralized	True	-10	True	GridWorld	SUNY	FullObsDiscrete	Individual_Q	0.2	0.2	1000000	0
IndivQLearningVar2/1011_101_1	centralized	True	-10	True	GridWorld	SUNY	FullObsDiscrete	Individual_Q	0.2	0.2	1000000	1
IndivQLearningVar2/1012_101_2	centralized	True	-10	True	GridWorld	SUNY	FullObsDiscrete	Individual_Q	0.2	0.2	1000000	2
IndivQLearningVar2/1013_101_3	centralized	True	-10	True	GridWorld	SUNY	FullObsDiscrete	Individual_Q	0.2	0.2	1000000	3
IndivQLearningVar2/1014_101_4	centralized	True	-10	True	GridWorld	SUNY	FullObsDiscrete	Individual_Q	0.2	0.2	1000000	4
IndivQLearningVar2/1015_101_5	centralized	True	-10	True	GridWorld	SUNY	FullObsDiscrete	Individual_Q	0.2	0.2	1000000	5
IndivQLearningVar2/1016_101_6	centralized	True	-10	True	GridWorld	SUNY	FullObsDiscrete	Individual_Q	0.2	0.2	1000000	6
IndivQLearningVar2/1017_101_7	centralized	True	-10	True	GridWorld	SUNY	FullObsDiscrete	Individual_Q	0.2	0.2	1000000	7
IndivQLearningVar2/1018_101_8	centralized	True	-10	True	GridWorld	SUNY	FullObsDiscrete	Individual_Q	0.2	0.2	1000000	8
IndivQLearningVar2/1019_101_9	centralized	True	-10	True	GridWorld	SUNY	FullObsDiscrete	Individual_Q	0.2	0.2	1000000	9
IndivQLearningVar2/1020_102_0	centralized	False	0	True	GridWorld	SUNY	FullObsDiscrete	Individual_Q	0.2	0.01	1000000	0
IndivQLearningVar2/1021_102_1	centralized	False	0	True	GridWorld	SUNY	FullObsDiscrete	Individual_Q	0.2	0.01	1000000	1
IndivQLearningVar2/1022_102_2	centralized	False	0	True	GridWorld	SUNY	FullObsDiscrete	Individual_Q	0.2	0.01	1000000	2
IndivQLearningVar2/1023_102_3	centralized	False	0	True	GridWorld	SUNY	FullObsDiscrete	Individual_Q	0.2	0.01	1000000	3
IndivQLearningVar2/1024_102_4	centralized	False	0	True	GridWorld	SUNY	FullObsDiscrete	Individual_Q	0.2	0.01	1000000	4
IndivQLearningVar2/1025_102_5	centralized	False	0	True	GridWorld	SUNY	FullObsDiscrete	Individual_Q	0.2	0.01	1000000	5
IndivQLearningVar2/1026_102_6	centralized	False	0	True	GridWorld	SUNY	FullObsDiscrete	Individual_Q	0.2	0.01	1000000	6
IndivQLearningVar2/1027_102_7	centralized	False	0	True	GridWorld	SUNY	FullObsDiscrete	Individual_Q	0.2	0.01	1000000	7
IndivQLearningVar2/1028_102_8	centralized	False	0	True	GridWorld	SUNY	FullObsDiscrete	Individual_Q	0.2	0.01	1000000	8
IndivQLearningVar2/1029_102_9	centralized	False	0	True	GridWorld	SUNY	FullObsDiscrete	Individual_Q	0.2	0.01	1000000	9
IndivQLearningVar2/1030_103_0	centralized	True	-10	True	GridWorld	SUNY	FullObsDiscrete	Individual_Q	0.2	0.01	1000000	0
IndivQLearningVar2/1031_103_1	centralized	True	-10	True	GridWorld	SUNY	FullObsDiscrete	Individual_Q	0.2	0.01	1000000	1
IndivQLearningVar2/1032_103_2	centralized	True	-10	True	GridWorld	SUNY	FullObsDiscrete	Individual_Q	0.2	0.01	1000000	2
IndivQLearningVar2/1033_103_3	centralized	True	-10	True	GridWorld	SUNY	FullObsDiscrete	Individual_Q	0.2	0.01	1000000	3
IndivQLearningVar2/1034_103_4	centralized	True	-10	True	GridWorld	SUNY	FullObsDiscrete	Individual_Q	0.2	0.01	1000000	4
IndivQLearningVar2/1035_103_5	centralized	True	-10	True	GridWorld	SUNY	FullObsDiscrete	Individual_Q	0.2	0.01	1000000	5
IndivQLearningVar2/1036_103_6	centralized	True	-10	True	GridWorld	SUNY	FullObsDiscrete	Individual_Q	0.2	0.01	1000000	6
IndivQLearningVar2/1037_103_7	centralized	True	-10	True	GridWorld	SUNY	FullObsDiscrete	Individual_Q	0.2	0.01	1000000	7
IndivQLearningVar2/1038_103_8	centralized	True	-10	True	GridWorld	SUNY	FullObsDiscrete	Individual_Q	0.2	0.01	1000000	8
IndivQLearningVar2/1039_103_9	centralized	True	-10	True	GridWorld	SUNY	FullObsDiscrete	Individual_Q	0.2	0.01	1000000	9
IndivQLearningVar2/1040_104_0	decentralized	False	0	True	GridWorld	SUNY	PartialObsDiscrete	Individual_Q	0.2	0.2	1000000	0
IndivQLearningVar2/1041_104_1	decentralized	False	0	True	GridWorld	SUNY	PartialObsDiscrete	Individual_Q	0.2	0.2	1000000	1
IndivQLearningVar2/1042_104_2	decentralized	False	0	True	GridWorld	SUNY	PartialObsDiscrete	Individual_Q	0.2	0.2	1000000	2
IndivQLearningVar2/1043_104_3	decentralized	False	0	True	GridWorld	SUNY	PartialObsDiscrete	Individual_Q	0.2	0.2	1000000	3
IndivQLearningVar2/1044_104_4	decentralized	False	0	True	GridWorld	SUNY	PartialObsDiscrete	Individual_Q	0.2	0.2	1000000	4
IndivQLearningVar2/1045_104_5	decentralized	False	0	True	GridWorld	SUNY	PartialObsDiscrete	Individual_Q	0.2	0.2	1000000	5
IndivQLearningVar2/1046_104_6	decentralized	False	0	True	GridWorld	SUNY	PartialObsDiscrete	Individual_Q	0.2	0.2	1000000	6
IndivQLearningVar2/1047_104_7	decentralized	False	0	True	GridWorld	SUNY	PartialObsDiscrete	Individual_Q	0.2	0.2	1000000	7
IndivQLearningVar2/1048_104_8	decentralized	False	0	True	GridWorld	SUNY	PartialObsDiscrete	Individual_Q	0.2	0.2	1000000	8
IndivQLearningVar2/1049_104_9	decentralized	False	0	True	GridWorld	SUNY	PartialObsDiscrete	Individual_Q	0.2	0.2	1000000	9
IndivQLearningVar2/1050_105_0	decentralized	True	-10	True	GridWorld	SUNY	PartialObsDiscrete	Individual_Q	0.2	0.2	1000000	0
IndivQLearningVar2/1051_105_1	decentralized	True	-10	True	GridWorld	SUNY	PartialObsDiscrete	Individual_Q	0.2	0.2	1000000	1
IndivQLearningVar2/1052_105_2	decentralized	True	-10	True	GridWorld	SUNY	PartialObsDiscrete	Individual_Q	0.2	0.2	1000000	2
IndivQLearningVar2/1053_105_3	decentralized	True	-10	True	GridWorld	SUNY	PartialObsDiscrete	Individual_Q	0.2	0.2	1000000	3
IndivQLearningVar2/1054_105_4	decentralized	True	-10	True	GridWorld	SUNY	PartialObsDiscrete	Individual_Q	0.2	0.2	1000000	4
IndivQLearningVar2/1055_105_5	decentralized	True	-10	True	GridWorld	SUNY	PartialObsDiscrete	Individual_Q	0.2	0.2	1000000	5
IndivQLearningVar2/1056_105_6	decentralized	True	-10	True	GridWorld	SUNY	PartialObsDiscrete	Individual_Q	0.2	0.2	1000000	6
IndivQLearningVar2/1057_105_7	decentralized	True	-10	True	GridWorld	SUNY	PartialObsDiscrete	Individual_Q	0.2	0.2	1000000	7
IndivQLearningVar2/1058_105_8	decentralized	True	-10	True	GridWorld	SUNY	PartialObsDiscrete	Individual_Q	0.2	0.2	1000000	8
IndivQLearningVar2/1059_105_9	decentralized	True	-10	True	GridWorld	SUNY	PartialObsDiscrete	Individual_Q	0.2	0.2	1000000	9
IndivQLearningVar2/1060_106_0	decentralized	False	0	True	GridWorld	SUNY	PartialObsDiscrete	Individual_Q	0.2	0.01	1000000	0
IndivQLearningVar2/1061_106_1	decentralized	False	0	True	GridWorld	SUNY	PartialObsDiscrete	Individual_Q	0.2	0.01	1000000	1
IndivQLearningVar2/1062_106_2	decentralized	False	0	True	GridWorld	SUNY	PartialObsDiscrete	Individual_Q	0.2	0.01	1000000	2
IndivQLearningVar2/1063_106_3	decentralized	False	0	True	GridWorld	SUNY	PartialObsDiscrete	Individual_Q	0.2	0.01	1000000	3
IndivQLearningVar2/1064_106_4	decentralized	False	0	True	GridWorld	SUNY	PartialObsDiscrete	Individual_Q	0.2	0.01	1000000	4
IndivQLearningVar2/1065_106_5	decentralized	False	0	True	GridWorld	SUNY	PartialObsDiscrete	Individual_Q	0.2	0.01	1000000	5
IndivQLearningVar2/1066_106_6	decentralized	False	0	True	GridWorld	SUNY	PartialObsDiscrete	Individual_Q	0.2	0.01	1000000	6
IndivQLearningVar2/1067_106_7	decentralized	False	0	True	GridWorld	SUNY	PartialObsDiscrete	Individual_Q	0.2	0.01	1000000	7
IndivQLearningVar2/1068_106_8	decentralized	False	0	True	GridWorld	SUNY	PartialObsDiscrete	Individual_Q	0.2	0.01	1000000	8
IndivQLearningVar2/1069_106_9	decentralized	False	0	True	GridWorld	SUNY	PartialObsDiscrete	Individual_Q	0.2	0.01	1000000	9
IndivQLearningVar2/1070_107_0	decentralized	True	-10	True	GridWorld	SUNY	PartialObsDiscrete	Individual_Q	0.2	0.01	1000000	0
IndivQLearningVar2/1071_107_1	decentralized	True	-10	True	GridWorld	SUNY	PartialObsDiscrete	Individual_Q	0.2	0.01	1000000	1
IndivQLearningVar2/1072_107_2	decentralized	True	-10	True	GridWorld	SUNY	PartialObsDiscrete	Individual_Q	0.2	0.01	1000000	2
IndivQLearningVar2/1073_107_3	decentralized	True	-10	True	GridWorld	SUNY	PartialObsDiscrete	Individual_Q	0.2	0.01	1000000	3
IndivQLearningVar2/1074_107_4	decentralized	True	-10	True	GridWorld	SUNY	PartialObsDiscrete	Individual_Q	0.2	0.01	1000000	4
IndivQLearningVar2/1075_107_5	decentralized	True	-10	True	GridWorld	SUNY	PartialObsDiscrete	Individual_Q	0.2	0.01	1000000	5
IndivQLearningVar2/1076_107_6	decentralized	True	-10	True	GridWorld	SUNY	PartialObsDiscrete	Individual_Q	0.2	0.01	1000000	6
IndivQLearningVar2/1077_107_7	decentralized	True	-10	True	GridWorld	SUNY	PartialObsDiscrete	Individual_Q	0.2	0.01	1000000	7
IndivQLearningVar2/1078_107_8	decentralized	True	-10	True	GridWorld	SUNY	PartialObsDiscrete	Individual_Q	0.2	0.01	1000000	8
IndivQLearningVar2/1079_107_9	decentralized	True	-10	True	GridWorld	SUNY	PartialObsDiscrete	Individual_Q	0.2	0.01	1000000	9
IndivQLearningVar2/1080_108_0	decentralized	False	0	True	GridWorld	SUNY	FullObsDiscrete	Individual_Q	0.2	0.2	1000000	0
IndivQLearningVar2/1081_108_1	decentralized	False	0	True	GridWorld	SUNY	FullObsDiscrete	Individual_Q	0.2	0.2	1000000	1
IndivQLearningVar2/1082_108_2	decentralized	False	0	True	GridWorld	SUNY	FullObsDiscrete	Individual_Q	0.2	0.2	1000000	2
IndivQLearningVar2/1083_108_3	decentralized	False	0	True	GridWorld	SUNY	FullObsDiscrete	Individual_Q	0.2	0.2	1000000	3
IndivQLearningVar2/1084_108_4	decentralized	False	0	True	GridWorld	SUNY	FullObsDiscrete	Individual_Q	0.2	0.2	1000000	4
IndivQLearningVar2/1085_108_5	decentralized	False	0	True	GridWorld	SUNY	FullObsDiscrete	Individual_Q	0.2	0.2	1000000	5
IndivQLearningVar2/1086_108_6	decentralized	False	0	True	GridWorld	SUNY	FullObsDiscrete	Individual_Q	0.2	0.2	1000000	6
IndivQLearningVar2/1087_108_7	decentralized	False	0	True	GridWorld	SUNY	FullObsDiscrete	Individual_Q	0.2	0.2	1000000	7
IndivQLearningVar2/1088_108_8	decentralized	False	0	True	GridWorld	SUNY	FullObsDiscrete	Individual_Q	0.2	0.2	1000000	8
IndivQLearningVar2/1089_108_9	decentralized	False	0	True	GridWorld	SUNY	FullObsDiscrete	Individual_Q	0.2	0.2	1000000	9
IndivQLearningVar2/1090_109_0	decentralized	True	-10	True	GridWorld	SUNY	FullObsDiscrete	Individual_Q	0.2	0.2	1000000	0
IndivQLearningVar2/1091_109_1	decentralized	True	-10	True	GridWorld	SUNY	FullObsDiscrete	Individual_Q	0.2	0.2	1000000	1
IndivQLearningVar2/1092_109_2	decentralized	True	-10	True	GridWorld	SUNY	FullObsDiscrete	Individual_Q	0.2	0.2	1000000	2
IndivQLearningVar2/1093_109_3	decentralized	True	-10	True	GridWorld	SUNY	FullObsDiscrete	Individual_Q	0.2	0.2	1000000	3
IndivQLearningVar2/1094_109_4	decentralized	True	-10	True	GridWorld	SUNY	FullObsDiscrete	Individual_Q	0.2	0.2	1000000	4
IndivQLearningVar2/1095_109_5	decentralized	True	-10	True	GridWorld	SUNY	FullObsDiscrete	Individual_Q	0.2	0.2	1000000	5
IndivQLearningVar2/1096_109_6	decentralized	True	-10	True	GridWorld	SUNY	FullObsDiscrete	Individual_Q	0.2	0.2	1000000	6
IndivQLearningVar2/1097_109_7	decentralized	True	-10	True	GridWorld	SUNY	FullObsDiscrete	Individual_Q	0.2	0.2	1000000	7
IndivQLearningVar2/1098_109_8	decentralized	True	-10	True	GridWorld	SUNY	FullObsDiscrete	Individual_Q	0.2	0.2	1000000	8
IndivQLearningVar2/1099_109_9	decentralized	True	-10	True	GridWorld	SUNY	FullObsDiscrete	Individual_Q	0.2	0.2	1000000	9
IndivQLearningVar2/1100_110_0	decentralized	False	0	True	GridWorld	SUNY	FullObsDiscrete	Individual_Q	0.2	0.01	1000000	0
IndivQLearningVar2/1101_110_1	decentralized	False	0	True	GridWorld	SUNY	FullObsDiscrete	Individual_Q	0.2	0.01	1000000	1
IndivQLearningVar2/1102_110_2	decentralized	False	0	True	GridWorld	SUNY	FullObsDiscrete	Individual_Q	0.2	0.01	1000000	2
IndivQLearningVar2/1103_110_3	decentralized	False	0	True	GridWorld	SUNY	FullObsDiscrete	Individual_Q	0.2	0.01	1000000	3
IndivQLearningVar2/1104_110_4	decentralized	False	0	True	GridWorld	SUNY	FullObsDiscrete	Individual_Q	0.2	0.01	1000000	4
IndivQLearningVar2/1105_110_5	decentralized	False	0	True	GridWorld	SUNY	FullObsDiscrete	Individual_Q	0.2	0.01	1000000	5
IndivQLearningVar2/1106_110_6	decentralized	False	0	True	GridWorld	SUNY	FullObsDiscrete	Individual_Q	0.2	0.01	1000000	6
IndivQLearningVar2/1107_110_7	decentralized	False	0	True	GridWorld	SUNY	FullObsDiscrete	Individual_Q	0.2	0.01	1000000	7
IndivQLearningVar2/1108_110_8	decentralized	False	0	True	GridWorld	SUNY	FullObsDiscrete	Individual_Q	0.2	0.01	1000000	8
IndivQLearningVar2/1109_110_9	decentralized	False	0	True	GridWorld	SUNY	FullObsDiscrete	Individual_Q	0.2	0.01	1000000	9
IndivQLearningVar2/1110_111_0	decentralized	True	-10	True	GridWorld	SUNY	FullObsDiscrete	Individual_Q	0.2	0.01	1000000	0
IndivQLearningVar2/1111_111_1	decentralized	True	-10	True	GridWorld	SUNY	FullObsDiscrete	Individual_Q	0.2	0.01	1000000	1
IndivQLearningVar2/1112_111_2	decentralized	True	-10	True	GridWorld	SUNY	FullObsDiscrete	Individual_Q	0.2	0.01	1000000	2
IndivQLearningVar2/1113_111_3	decentralized	True	-10	True	GridWorld	SUNY	FullObsDiscrete	Individual_Q	0.2	0.01	1000000	3
IndivQLearningVar2/1114_111_4	decentralized	True	-10	True	GridWorld	SUNY	FullObsDiscrete	Individual_Q	0.2	0.01	1000000	4
IndivQLearningVar2/1115_111_5	decentralized	True	-10	True	GridWorld	SUNY	FullObsDiscrete	Individual_Q	0.2	0.01	1000000	5
IndivQLearningVar2/1116_111_6	decentralized	True	-10	True	GridWorld	SUNY	FullObsDiscrete	Individual_Q	0.2	0.01	1000000	6
IndivQLearningVar2/1117_111_7	decentralized	True	-10	True	GridWorld	SUNY	FullObsDiscrete	Individual_Q	0.2	0.01	1000000	7
IndivQLearningVar2/1118_111_8	decentralized	True	-10	True	GridWorld	SUNY	FullObsDiscrete	Individual_Q	0.2	0.01	1000000	8
IndivQLearningVar2/1119_111_9	decentralized	True	-10	True	GridWorld	SUNY	FullObsDiscrete	Individual_Q	0.2	0.01	1000000	9
IndivQLearningVar2/1120_112_0	none	False	0	True	GridWorld	SUNY	PartialObsDiscrete	Individual_Q	0.2	0.2	1000000	0
IndivQLearningVar2/1121_112_1	none	False	0	True	GridWorld	SUNY	PartialObsDiscrete	Individual_Q	0.2	0.2	1000000	1
IndivQLearningVar2/1122_112_2	none	False	0	True	GridWorld	SUNY	PartialObsDiscrete	Individual_Q	0.2	0.2	1000000	2
IndivQLearningVar2/1123_112_3	none	False	0	True	GridWorld	SUNY	PartialObsDiscrete	Individual_Q	0.2	0.2	1000000	3
IndivQLearningVar2/1124_112_4	none	False	0	True	GridWorld	SUNY	PartialObsDiscrete	Individual_Q	0.2	0.2	1000000	4
IndivQLearningVar2/1125_112_5	none	False	0	True	GridWorld	SUNY	PartialObsDiscrete	Individual_Q	0.2	0.2	1000000	5
IndivQLearningVar2/1126_112_6	none	False	0	True	GridWorld	SUNY	PartialObsDiscrete	Individual_Q	0.2	0.2	1000000	6
IndivQLearningVar2/1127_112_7	none	False	0	True	GridWorld	SUNY	PartialObsDiscrete	Individual_Q	0.2	0.2	1000000	7
IndivQLearningVar2/1128_112_8	none	False	0	True	GridWorld	SUNY	PartialObsDiscrete	Individual_Q	0.2	0.2	1000000	8
IndivQLearningVar2/1129_112_9	none	False	0	True	GridWorld	SUNY	PartialObsDiscrete	Individual_Q	0.2	0.2	1000000	9
IndivQLearningVar2/1130_113_0	none	True	-10	True	GridWorld	SUNY	PartialObsDiscrete	Individual_Q	0.2	0.2	1000000	0
IndivQLearningVar2/1131_113_1	none	True	-10	True	GridWorld	SUNY	PartialObsDiscrete	Individual_Q	0.2	0.2	1000000	1
IndivQLearningVar2/1132_113_2	none	True	-10	True	GridWorld	SUNY	PartialObsDiscrete	Individual_Q	0.2	0.2	1000000	2
IndivQLearningVar2/1133_113_3	none	True	-10	True	GridWorld	SUNY	PartialObsDiscrete	Individual_Q	0.2	0.2	1000000	3
IndivQLearningVar2/1134_113_4	none	True	-10	True	GridWorld	SUNY	PartialObsDiscrete	Individual_Q	0.2	0.2	1000000	4
IndivQLearningVar2/1135_113_5	none	True	-10	True	GridWorld	SUNY	PartialObsDiscrete	Individual_Q	0.2	0.2	1000000	5
IndivQLearningVar2/1136_113_6	none	True	-10	True	GridWorld	SUNY	PartialObsDiscrete	Individual_Q	0.2	0.2	1000000	6
IndivQLearningVar2/1137_113_7	none	True	-10	True	GridWorld	SUNY	PartialObsDiscrete	Individual_Q	0.2	0.2	1000000	7
IndivQLearningVar2/1138_113_8	none	True	-10	True	GridWorld	SUNY	PartialObsDiscrete	Individual_Q	0.2	0.2	1000000	8
IndivQLearningVar2/1139_113_9	none	True	-10	True	GridWorld	SUNY	PartialObsDiscrete	Individual_Q	0.2	0.2	1000000	9
IndivQLearningVar2/1140_114_0	none	False	0	True	GridWorld	SUNY	PartialObsDiscrete	Individual_Q	0.2	0.01	1000000	0
IndivQLearningVar2/1141_114_1	none	False	0	True	GridWorld	SUNY	PartialObsDiscrete	Individual_Q	0.2	0.01	1000000	1
IndivQLearningVar2/1142_114_2	none	False	0	True	GridWorld	SUNY	PartialObsDiscrete	Individual_Q	0.2	0.01	1000000	2
IndivQLearningVar2/1143_114_3	none	False	0	True	GridWorld	SUNY	PartialObsDiscrete	Individual_Q	0.2	0.01	1000000	3
IndivQLearningVar2/1144_114_4	none	False	0	True	GridWorld	SUNY	PartialObsDiscrete	Individual_Q	0.2	0.01	1000000	4
IndivQLearningVar2/1145_114_5	none	False	0	True	GridWorld	SUNY	PartialObsDiscrete	Individual_Q	0.2	0.01	1000000	5
IndivQLearningVar2/1146_114_6	none	False	0	True	GridWorld	SUNY	PartialObsDiscrete	Individual_Q	0.2	0.01	1000000	6
IndivQLearningVar2/1147_114_7	none	False	0	True	GridWorld	SUNY	PartialObsDiscrete	Individual_Q	0.2	0.01	1000000	7
IndivQLearningVar2/1148_114_8	none	False	0	True	GridWorld	SUNY	PartialObsDiscrete	Individual_Q	0.2	0.01	1000000	8
IndivQLearningVar2/1149_114_9	none	False	0	True	GridWorld	SUNY	PartialObsDiscrete	Individual_Q	0.2	0.01	1000000	9
IndivQLearningVar2/1150_115_0	none	True	-10	True	GridWorld	SUNY	PartialObsDiscrete	Individual_Q	0.2	0.01	1000000	0
IndivQLearningVar2/1151_115_1	none	True	-10	True	GridWorld	SUNY	PartialObsDiscrete	Individual_Q	0.2	0.01	1000000	1
IndivQLearningVar2/1152_115_2	none	True	-10	True	GridWorld	SUNY	PartialObsDiscrete	Individual_Q	0.2	0.01	1000000	2
IndivQLearningVar2/1153_115_3	none	True	-10	True	GridWorld	SUNY	PartialObsDiscrete	Individual_Q	0.2	0.01	1000000	3
IndivQLearningVar2/1154_115_4	none	True	-10	True	GridWorld	SUNY	PartialObsDiscrete	Individual_Q	0.2	0.01	1000000	4
IndivQLearningVar2/1155_115_5	none	True	-10	True	GridWorld	SUNY	PartialObsDiscrete	Individual_Q	0.2	0.01	1000000	5
IndivQLearningVar2/1156_115_6	none	True	-10	True	GridWorld	SUNY	PartialObsDiscrete	Individual_Q	0.2	0.01	1000000	6
IndivQLearningVar2/1157_115_7	none	True	-10	True	GridWorld	SUNY	PartialObsDiscrete	Individual_Q	0.2	0.01	1000000	7
IndivQLearningVar2/1158_115_8	none	True	-10	True	GridWorld	SUNY	PartialObsDiscrete	Individual_Q	0.2	0.01	1000000	8
IndivQLearningVar2/1159_115_9	none	True	-10	True	GridWorld	SUNY	PartialObsDiscrete	Individual_Q	0.2	0.01	1000000	9
IndivQLearningVar2/1160_116_0	none	False	0	True	GridWorld	SUNY	FullObsDiscrete	Individual_Q	0.2	0.2	1000000	0
IndivQLearningVar2/1161_116_1	none	False	0	True	GridWorld	SUNY	FullObsDiscrete	Individual_Q	0.2	0.2	1000000	1
IndivQLearningVar2/1162_116_2	none	False	0	True	GridWorld	SUNY	FullObsDiscrete	Individual_Q	0.2	0.2	1000000	2
IndivQLearningVar2/1163_116_3	none	False	0	True	GridWorld	SUNY	FullObsDiscrete	Individual_Q	0.2	0.2	1000000	3
IndivQLearningVar2/1164_116_4	none	False	0	True	GridWorld	SUNY	FullObsDiscrete	Individual_Q	0.2	0.2	1000000	4
IndivQLearningVar2/1165_116_5	none	False	0	True	GridWorld	SUNY	FullObsDiscrete	Individual_Q	0.2	0.2	1000000	5
IndivQLearningVar2/1166_116_6	none	False	0	True	GridWorld	SUNY	FullObsDiscrete	Individual_Q	0.2	0.2	1000000	6
IndivQLearningVar2/1167_116_7	none	False	0	True	GridWorld	SUNY	FullObsDiscrete	Individual_Q	0.2	0.2	1000000	7
IndivQLearningVar2/1168_116_8	none	False	0	True	GridWorld	SUNY	FullObsDiscrete	Individual_Q	0.2	0.2	1000000	8
IndivQLearningVar2/1169_116_9	none	False	0	True	GridWorld	SUNY	FullObsDiscrete	Individual_Q	0.2	0.2	1000000	9
IndivQLearningVar2/1170_117_0	none	True	-10	True	GridWorld	SUNY	FullObsDiscrete	Individual_Q	0.2	0.2	1000000	0
IndivQLearningVar2/1171_117_1	none	True	-10	True	GridWorld	SUNY	FullObsDiscrete	Individual_Q	0.2	0.2	1000000	1
IndivQLearningVar2/1172_117_2	none	True	-10	True	GridWorld	SUNY	FullObsDiscrete	Individual_Q	0.2	0.2	1000000	2
IndivQLearningVar2/1173_117_3	none	True	-10	True	GridWorld	SUNY	FullObsDiscrete	Individual_Q	0.2	0.2	1000000	3
IndivQLearningVar2/1174_117_4	none	True	-10	True	GridWorld	SUNY	FullObsDiscrete	Individual_Q	0.2	0.2	1000000	4
IndivQLearningVar2/1175_117_5	none	True	-10	True	GridWorld	SUNY	FullObsDiscrete	Individual_Q	0.2	0.2	1000000	5
IndivQLearningVar2/1176_117_6	none	True	-10	True	GridWorld	SUNY	FullObsDiscrete	Individual_Q	0.2	0.2	1000000	6
IndivQLearningVar2/1177_117_7	none	True	-10	True	GridWorld	SUNY	FullObsDiscrete	Individual_Q	0.2	0.2	1000000	7
IndivQLearningVar2/1178_117_8	none	True	-10	True	GridWorld	SUNY	FullObsDiscrete	Individual_Q	0.2	0.2	1000000	8
IndivQLearningVar2/1179_117_9	none	True	-10	True	GridWorld	SUNY	FullObsDiscrete	Individual_Q	0.2	0.2	1000000	9
IndivQLearningVar2/1180_118_0	none	False	0	True	GridWorld	SUNY	FullObsDiscrete	Individual_Q	0.2	0.01	1000000	0
IndivQLearningVar2/1181_118_1	none	False	0	True	GridWorld	SUNY	FullObsDiscrete	Individual_Q	0.2	0.01	1000000	1
IndivQLearningVar2/1182_118_2	none	False	0	True	GridWorld	SUNY	FullObsDiscrete	Individual_Q	0.2	0.01	1000000	2
IndivQLearningVar2/1183_118_3	none	False	0	True	GridWorld	SUNY	FullObsDiscrete	Individual_Q	0.2	0.01	1000000	3
IndivQLearningVar2/1184_118_4	none	False	0	True	GridWorld	SUNY	FullObsDiscrete	Individual_Q	0.2	0.01	1000000	4
IndivQLearningVar2/1185_118_5	none	False	0	True	GridWorld	SUNY	FullObsDiscrete	Individual_Q	0.2	0.01	1000000	5
IndivQLearningVar2/1186_118_6	none	False	0	True	GridWorld	SUNY	FullObsDiscrete	Individual_Q	0.2	0.01	1000000	6
IndivQLearningVar2/1187_118_7	none	False	0	True	GridWorld	SUNY	FullObsDiscrete	Individual_Q	0.2	0.01	1000000	7
IndivQLearningVar2/1188_118_8	none	False	0	True	GridWorld	SUNY	FullObsDiscrete	Individual_Q	0.2	0.01	1000000	8
IndivQLearningVar2/1189_118_9	none	False	0	True	GridWorld	SUNY	FullObsDiscrete	Individual_Q	0.2	0.01	1000000	9
IndivQLearningVar2/1190_119_0	none	True	-10	True	GridWorld	SUNY	FullObsDiscrete	Individual_Q	0.2	0.01	1000000	0
IndivQLearningVar2/1191_119_1	none	True	-10	True	GridWorld	SUNY	FullObsDiscrete	Individual_Q	0.2	0.01	1000000	1
IndivQLearningVar2/1192_119_2	none	True	-10	True	GridWorld	SUNY	FullObsDiscrete	Individual_Q	0.2	0.01	1000000	2
IndivQLearningVar2/1193_119_3	none	True	-10	True	GridWorld	SUNY	FullObsDiscrete	Individual_Q	0.2	0.01	1000000	3
IndivQLearningVar2/1194_119_4	none	True	-10	True	GridWorld	SUNY	FullObsDiscrete	Individual_Q	0.2	0.01	1000000	4
IndivQLearningVar2/1195_119_5	none	True	-10	True	GridWorld	SUNY	FullObsDiscrete	Individual_Q	0.2	0.01	1000000	5
IndivQLearningVar2/1196_119_6	none	True	-10	True	GridWorld	SUNY	FullObsDiscrete	Individual_Q	0.2	0.01	1000000	6
IndivQLearningVar2/1197_119_7	none	True	-10	True	GridWorld	SUNY	FullObsDiscrete	Individual_Q	0.2	0.01	1000000	7
IndivQLearningVar2/1198_119_8	none	True	-10	True	GridWorld	SUNY	FullObsDiscrete	Individual_Q	0.2	0.01	1000000	8
IndivQLearningVar2/1199_119_9	none	True	-10	True	GridWorld	SUNY	FullObsDiscrete	Individual_Q	0.2	0.01	1000000	9
IndivQLearningVar2/1200_120_0	centralized	False	0	False	GridWorld	SUNY	PartialObsDiscrete	Individual_Q	0.2	0.2	1000000	0
IndivQLearningVar2/1201_120_1	centralized	False	0	False	GridWorld	SUNY	PartialObsDiscrete	Individual_Q	0.2	0.2	1000000	1
IndivQLearningVar2/1202_120_2	centralized	False	0	False	GridWorld	SUNY	PartialObsDiscrete	Individual_Q	0.2	0.2	1000000	2
IndivQLearningVar2/1203_120_3	centralized	False	0	False	GridWorld	SUNY	PartialObsDiscrete	Individual_Q	0.2	0.2	1000000	3
IndivQLearningVar2/1204_120_4	centralized	False	0	False	GridWorld	SUNY	PartialObsDiscrete	Individual_Q	0.2	0.2	1000000	4
IndivQLearningVar2/1205_120_5	centralized	False	0	False	GridWorld	SUNY	PartialObsDiscrete	Individual_Q	0.2	0.2	1000000	5
IndivQLearningVar2/1206_120_6	centralized	False	0	False	GridWorld	SUNY	PartialObsDiscrete	Individual_Q	0.2	0.2	1000000	6
IndivQLearningVar2/1207_120_7	centralized	False	0	False	GridWorld	SUNY	PartialObsDiscrete	Individual_Q	0.2	0.2	1000000	7
IndivQLearningVar2/1208_120_8	centralized	False	0	False	GridWorld	SUNY	PartialObsDiscrete	Individual_Q	0.2	0.2	1000000	8
IndivQLearningVar2/1209_120_9	centralized	False	0	False	GridWorld	SUNY	PartialObsDiscrete	Individual_Q	0.2	0.2	1000000	9
IndivQLearningVar2/1210_121_0	centralized	True	-10	False	GridWorld	SUNY	PartialObsDiscrete	Individual_Q	0.2	0.2	1000000	0
IndivQLearningVar2/1211_121_1	centralized	True	-10	False	GridWorld	SUNY	PartialObsDiscrete	Individual_Q	0.2	0.2	1000000	1
IndivQLearningVar2/1212_121_2	centralized	True	-10	False	GridWorld	SUNY	PartialObsDiscrete	Individual_Q	0.2	0.2	1000000	2
IndivQLearningVar2/1213_121_3	centralized	True	-10	False	GridWorld	SUNY	PartialObsDiscrete	Individual_Q	0.2	0.2	1000000	3
IndivQLearningVar2/1214_121_4	centralized	True	-10	False	GridWorld	SUNY	PartialObsDiscrete	Individual_Q	0.2	0.2	1000000	4
IndivQLearningVar2/1215_121_5	centralized	True	-10	False	GridWorld	SUNY	PartialObsDiscrete	Individual_Q	0.2	0.2	1000000	5
IndivQLearningVar2/1216_121_6	centralized	True	-10	False	GridWorld	SUNY	PartialObsDiscrete	Individual_Q	0.2	0.2	1000000	6
IndivQLearningVar2/1217_121_7	centralized	True	-10	False	GridWorld	SUNY	PartialObsDiscrete	Individual_Q	0.2	0.2	1000000	7
IndivQLearningVar2/1218_121_8	centralized	True	-10	False	GridWorld	SUNY	PartialObsDiscrete	Individual_Q	0.2	0.2	1000000	8
IndivQLearningVar2/1219_121_9	centralized	True	-10	False	GridWorld	SUNY	PartialObsDiscrete	Individual_Q	0.2	0.2	1000000	9
IndivQLearningVar2/1220_122_0	centralized	False	0	False	GridWorld	SUNY	PartialObsDiscrete	Individual_Q	0.2	0.01	1000000	0
IndivQLearningVar2/1221_122_1	centralized	False	0	False	GridWorld	SUNY	PartialObsDiscrete	Individual_Q	0.2	0.01	1000000	1
IndivQLearningVar2/1222_122_2	centralized	False	0	False	GridWorld	SUNY	PartialObsDiscrete	Individual_Q	0.2	0.01	1000000	2
IndivQLearningVar2/1223_122_3	centralized	False	0	False	GridWorld	SUNY	PartialObsDiscrete	Individual_Q	0.2	0.01	1000000	3
IndivQLearningVar2/1224_122_4	centralized	False	0	False	GridWorld	SUNY	PartialObsDiscrete	Individual_Q	0.2	0.01	1000000	4
IndivQLearningVar2/1225_122_5	centralized	False	0	False	GridWorld	SUNY	PartialObsDiscrete	Individual_Q	0.2	0.01	1000000	5
IndivQLearningVar2/1226_122_6	centralized	False	0	False	GridWorld	SUNY	PartialObsDiscrete	Individual_Q	0.2	0.01	1000000	6
IndivQLearningVar2/1227_122_7	centralized	False	0	False	GridWorld	SUNY	PartialObsDiscrete	Individual_Q	0.2	0.01	1000000	7
IndivQLearningVar2/1228_122_8	centralized	False	0	False	GridWorld	SUNY	PartialObsDiscrete	Individual_Q	0.2	0.01	1000000	8
IndivQLearningVar2/1229_122_9	centralized	False	0	False	GridWorld	SUNY	PartialObsDiscrete	Individual_Q	0.2	0.01	1000000	9
IndivQLearningVar2/1230_123_0	centralized	True	-10	False	GridWorld	SUNY	PartialObsDiscrete	Individual_Q	0.2	0.01	1000000	0
IndivQLearningVar2/1231_123_1	centralized	True	-10	False	GridWorld	SUNY	PartialObsDiscrete	Individual_Q	0.2	0.01	1000000	1
IndivQLearningVar2/1232_123_2	centralized	True	-10	False	GridWorld	SUNY	PartialObsDiscrete	Individual_Q	0.2	0.01	1000000	2
IndivQLearningVar2/1233_123_3	centralized	True	-10	False	GridWorld	SUNY	PartialObsDiscrete	Individual_Q	0.2	0.01	1000000	3
IndivQLearningVar2/1234_123_4	centralized	True	-10	False	GridWorld	SUNY	PartialObsDiscrete	Individual_Q	0.2	0.01	1000000	4
IndivQLearningVar2/1235_123_5	centralized	True	-10	False	GridWorld	SUNY	PartialObsDiscrete	Individual_Q	0.2	0.01	1000000	5
IndivQLearningVar2/1236_123_6	centralized	True	-10	False	GridWorld	SUNY	PartialObsDiscrete	Individual_Q	0.2	0.01	1000000	6
IndivQLearningVar2/1237_123_7	centralized	True	-10	False	GridWorld	SUNY	PartialObsDiscrete	Individual_Q	0.2	0.01	1000000	7
IndivQLearningVar2/1238_123_8	centralized	True	-10	False	GridWorld	SUNY	PartialObsDiscrete	Individual_Q	0.2	0.01	1000000	8
IndivQLearningVar2/1239_123_9	centralized	True	-10	False	GridWorld	SUNY	PartialObsDiscrete	Individual_Q	0.2	0.01	1000000	9
IndivQLearningVar2/1240_124_0	centralized	False	0	False	GridWorld	SUNY	FullObsDiscrete	Individual_Q	0.2	0.2	1000000	0
IndivQLearningVar2/1241_124_1	centralized	False	0	False	GridWorld	SUNY	FullObsDiscrete	Individual_Q	0.2	0.2	1000000	1
IndivQLearningVar2/1242_124_2	centralized	False	0	False	GridWorld	SUNY	FullObsDiscrete	Individual_Q	0.2	0.2	1000000	2
IndivQLearningVar2/1243_124_3	centralized	False	0	False	GridWorld	SUNY	FullObsDiscrete	Individual_Q	0.2	0.2	1000000	3
IndivQLearningVar2/1244_124_4	centralized	False	0	False	GridWorld	SUNY	FullObsDiscrete	Individual_Q	0.2	0.2	1000000	4
IndivQLearningVar2/1245_124_5	centralized	False	0	False	GridWorld	SUNY	FullObsDiscrete	Individual_Q	0.2	0.2	1000000	5
IndivQLearningVar2/1246_124_6	centralized	False	0	False	GridWorld	SUNY	FullObsDiscrete	Individual_Q	0.2	0.2	1000000	6
IndivQLearningVar2/1247_124_7	centralized	False	0	False	GridWorld	SUNY	FullObsDiscrete	Individual_Q	0.2	0.2	1000000	7
IndivQLearningVar2/1248_124_8	centralized	False	0	False	GridWorld	SUNY	FullObsDiscrete	Individual_Q	0.2	0.2	1000000	8
IndivQLearningVar2/1249_124_9	centralized	False	0	False	GridWorld	SUNY	FullObsDiscrete	Individual_Q	0.2	0.2	1000000	9
IndivQLearningVar2/1250_125_0	centralized	True	-10	False	GridWorld	SUNY	FullObsDiscrete	Individual_Q	0.2	0.2	1000000	0
IndivQLearningVar2/1251_125_1	centralized	True	-10	False	GridWorld	SUNY	FullObsDiscrete	Individual_Q	0.2	0.2	1000000	1
IndivQLearningVar2/1252_125_2	centralized	True	-10	False	GridWorld	SUNY	FullObsDiscrete	Individual_Q	0.2	0.2	1000000	2
IndivQLearningVar2/1253_125_3	centralized	True	-10	False	GridWorld	SUNY	FullObsDiscrete	Individual_Q	0.2	0.2	1000000	3
IndivQLearningVar2/1254_125_4	centralized	True	-10	False	GridWorld	SUNY	FullObsDiscrete	Individual_Q	0.2	0.2	1000000	4
IndivQLearningVar2/1255_125_5	centralized	True	-10	False	GridWorld	SUNY	FullObsDiscrete	Individual_Q	0.2	0.2	1000000	5
IndivQLearningVar2/1256_125_6	centralized	True	-10	False	GridWorld	SUNY	FullObsDiscrete	Individual_Q	0.2	0.2	1000000	6
IndivQLearningVar2/1257_125_7	centralized	True	-10	False	GridWorld	SUNY	FullObsDiscrete	Individual_Q	0.2	0.2	1000000	7
IndivQLearningVar2/1258_125_8	centralized	True	-10	False	GridWorld	SUNY	FullObsDiscrete	Individual_Q	0.2	0.2	1000000	8
IndivQLearningVar2/1259_125_9	centralized	True	-10	False	GridWorld	SUNY	FullObsDiscrete	Individual_Q	0.2	0.2	1000000	9
IndivQLearningVar2/1260_126_0	centralized	False	0	False	GridWorld	SUNY	FullObsDiscrete	Individual_Q	0.2	0.01	1000000	0
IndivQLearningVar2/1261_126_1	centralized	False	0	False	GridWorld	SUNY	FullObsDiscrete	Individual_Q	0.2	0.01	1000000	1
IndivQLearningVar2/1262_126_2	centralized	False	0	False	GridWorld	SUNY	FullObsDiscrete	Individual_Q	0.2	0.01	1000000	2
IndivQLearningVar2/1263_126_3	centralized	False	0	False	GridWorld	SUNY	FullObsDiscrete	Individual_Q	0.2	0.01	1000000	3
IndivQLearningVar2/1264_126_4	centralized	False	0	False	GridWorld	SUNY	FullObsDiscrete	Individual_Q	0.2	0.01	1000000	4
IndivQLearningVar2/1265_126_5	centralized	False	0	False	GridWorld	SUNY	FullObsDiscrete	Individual_Q	0.2	0.01	1000000	5
IndivQLearningVar2/1266_126_6	centralized	False	0	False	GridWorld	SUNY	FullObsDiscrete	Individual_Q	0.2	0.01	1000000	6
IndivQLearningVar2/1267_126_7	centralized	False	0	False	GridWorld	SUNY	FullObsDiscrete	Individual_Q	0.2	0.01	1000000	7
IndivQLearningVar2/1268_126_8	centralized	False	0	False	GridWorld	SUNY	FullObsDiscrete	Individual_Q	0.2	0.01	1000000	8
IndivQLearningVar2/1269_126_9	centralized	False	0	False	GridWorld	SUNY	FullObsDiscrete	Individual_Q	0.2	0.01	1000000	9
IndivQLearningVar2/1270_127_0	centralized	True	-10	False	GridWorld	SUNY	FullObsDiscrete	Individual_Q	0.2	0.01	1000000	0
IndivQLearningVar2/1271_127_1	centralized	True	-10	False	GridWorld	SUNY	FullObsDiscrete	Individual_Q	0.2	0.01	1000000	1
IndivQLearningVar2/1272_127_2	centralized	True	-10	False	GridWorld	SUNY	FullObsDiscrete	Individual_Q	0.2	0.01	1000000	2
IndivQLearningVar2/1273_127_3	centralized	True	-10	False	GridWorld	SUNY	FullObsDiscrete	Individual_Q	0.2	0.01	1000000	3
IndivQLearningVar2/1274_127_4	centralized	True	-10	False	GridWorld	SUNY	FullObsDiscrete	Individual_Q	0.2	0.01	1000000	4
IndivQLearningVar2/1275_127_5	centralized	True	-10	False	GridWorld	SUNY	FullObsDiscrete	Individual_Q	0.2	0.01	1000000	5
IndivQLearningVar2/1276_127_6	centralized	True	-10	False	GridWorld	SUNY	FullObsDiscrete	Individual_Q	0.2	0.01	1000000	6
IndivQLearningVar2/1277_127_7	centralized	True	-10	False	GridWorld	SUNY	FullObsDiscrete	Individual_Q	0.2	0.01	1000000	7
IndivQLearningVar2/1278_127_8	centralized	True	-10	False	GridWorld	SUNY	FullObsDiscrete	Individual_Q	0.2	0.01	1000000	8
IndivQLearningVar2/1279_127_9	centralized	True	-10	False	GridWorld	SUNY	FullObsDiscrete	Individual_Q	0.2	0.01	1000000	9
IndivQLearningVar2/1280_128_0	decentralized	False	0	False	GridWorld	SUNY	PartialObsDiscrete	Individual_Q	0.2	0.2	1000000	0
IndivQLearningVar2/1281_128_1	decentralized	False	0	False	GridWorld	SUNY	PartialObsDiscrete	Individual_Q	0.2	0.2	1000000	1
IndivQLearningVar2/1282_128_2	decentralized	False	0	False	GridWorld	SUNY	PartialObsDiscrete	Individual_Q	0.2	0.2	1000000	2
IndivQLearningVar2/1283_128_3	decentralized	False	0	False	GridWorld	SUNY	PartialObsDiscrete	Individual_Q	0.2	0.2	1000000	3
IndivQLearningVar2/1284_128_4	decentralized	False	0	False	GridWorld	SUNY	PartialObsDiscrete	Individual_Q	0.2	0.2	1000000	4
IndivQLearningVar2/1285_128_5	decentralized	False	0	False	GridWorld	SUNY	PartialObsDiscrete	Individual_Q	0.2	0.2	1000000	5
IndivQLearningVar2/1286_128_6	decentralized	False	0	False	GridWorld	SUNY	PartialObsDiscrete	Individual_Q	0.2	0.2	1000000	6
IndivQLearningVar2/1287_128_7	decentralized	False	0	False	GridWorld	SUNY	PartialObsDiscrete	Individual_Q	0.2	0.2	1000000	7
IndivQLearningVar2/1288_128_8	decentralized	False	0	False	GridWorld	SUNY	PartialObsDiscrete	Individual_Q	0.2	0.2	1000000	8
IndivQLearningVar2/1289_128_9	decentralized	False	0	False	GridWorld	SUNY	PartialObsDiscrete	Individual_Q	0.2	0.2	1000000	9
IndivQLearningVar2/1290_129_0	decentralized	True	-10	False	GridWorld	SUNY	PartialObsDiscrete	Individual_Q	0.2	0.2	1000000	0
IndivQLearningVar2/1291_129_1	decentralized	True	-10	False	GridWorld	SUNY	PartialObsDiscrete	Individual_Q	0.2	0.2	1000000	1
IndivQLearningVar2/1292_129_2	decentralized	True	-10	False	GridWorld	SUNY	PartialObsDiscrete	Individual_Q	0.2	0.2	1000000	2
IndivQLearningVar2/1293_129_3	decentralized	True	-10	False	GridWorld	SUNY	PartialObsDiscrete	Individual_Q	0.2	0.2	1000000	3
IndivQLearningVar2/1294_129_4	decentralized	True	-10	False	GridWorld	SUNY	PartialObsDiscrete	Individual_Q	0.2	0.2	1000000	4
IndivQLearningVar2/1295_129_5	decentralized	True	-10	False	GridWorld	SUNY	PartialObsDiscrete	Individual_Q	0.2	0.2	1000000	5
IndivQLearningVar2/1296_129_6	decentralized	True	-10	False	GridWorld	SUNY	PartialObsDiscrete	Individual_Q	0.2	0.2	1000000	6
IndivQLearningVar2/1297_129_7	decentralized	True	-10	False	GridWorld	SUNY	PartialObsDiscrete	Individual_Q	0.2	0.2	1000000	7
IndivQLearningVar2/1298_129_8	decentralized	True	-10	False	GridWorld	SUNY	PartialObsDiscrete	Individual_Q	0.2	0.2	1000000	8
IndivQLearningVar2/1299_129_9	decentralized	True	-10	False	GridWorld	SUNY	PartialObsDiscrete	Individual_Q	0.2	0.2	1000000	9
IndivQLearningVar2/1300_130_0	decentralized	False	0	False	GridWorld	SUNY	PartialObsDiscrete	Individual_Q	0.2	0.01	1000000	0
IndivQLearningVar2/1301_130_1	decentralized	False	0	False	GridWorld	SUNY	PartialObsDiscrete	Individual_Q	0.2	0.01	1000000	1
IndivQLearningVar2/1302_130_2	decentralized	False	0	False	GridWorld	SUNY	PartialObsDiscrete	Individual_Q	0.2	0.01	1000000	2
IndivQLearningVar2/1303_130_3	decentralized	False	0	False	GridWorld	SUNY	PartialObsDiscrete	Individual_Q	0.2	0.01	1000000	3
IndivQLearningVar2/1304_130_4	decentralized	False	0	False	GridWorld	SUNY	PartialObsDiscrete	Individual_Q	0.2	0.01	1000000	4
IndivQLearningVar2/1305_130_5	decentralized	False	0	False	GridWorld	SUNY	PartialObsDiscrete	Individual_Q	0.2	0.01	1000000	5
IndivQLearningVar2/1306_130_6	decentralized	False	0	False	GridWorld	SUNY	PartialObsDiscrete	Individual_Q	0.2	0.01	1000000	6
IndivQLearningVar2/1307_130_7	decentralized	False	0	False	GridWorld	SUNY	PartialObsDiscrete	Individual_Q	0.2	0.01	1000000	7
IndivQLearningVar2/1308_130_8	decentralized	False	0	False	GridWorld	SUNY	PartialObsDiscrete	Individual_Q	0.2	0.01	1000000	8
IndivQLearningVar2/1309_130_9	decentralized	False	0	False	GridWorld	SUNY	PartialObsDiscrete	Individual_Q	0.2	0.01	1000000	9
IndivQLearningVar2/1310_131_0	decentralized	True	-10	False	GridWorld	SUNY	PartialObsDiscrete	Individual_Q	0.2	0.01	1000000	0
IndivQLearningVar2/1311_131_1	decentralized	True	-10	False	GridWorld	SUNY	PartialObsDiscrete	Individual_Q	0.2	0.01	1000000	1
IndivQLearningVar2/1312_131_2	decentralized	True	-10	False	GridWorld	SUNY	PartialObsDiscrete	Individual_Q	0.2	0.01	1000000	2
IndivQLearningVar2/1313_131_3	decentralized	True	-10	False	GridWorld	SUNY	PartialObsDiscrete	Individual_Q	0.2	0.01	1000000	3
IndivQLearningVar2/1314_131_4	decentralized	True	-10	False	GridWorld	SUNY	PartialObsDiscrete	Individual_Q	0.2	0.01	1000000	4
IndivQLearningVar2/1315_131_5	decentralized	True	-10	False	GridWorld	SUNY	PartialObsDiscrete	Individual_Q	0.2	0.01	1000000	5
IndivQLearningVar2/1316_131_6	decentralized	True	-10	False	GridWorld	SUNY	PartialObsDiscrete	Individual_Q	0.2	0.01	1000000	6
IndivQLearningVar2/1317_131_7	decentralized	True	-10	False	GridWorld	SUNY	PartialObsDiscrete	Individual_Q	0.2	0.01	1000000	7
IndivQLearningVar2/1318_131_8	decentralized	True	-10	False	GridWorld	SUNY	PartialObsDiscrete	Individual_Q	0.2	0.01	1000000	8
IndivQLearningVar2/1319_131_9	decentralized	True	-10	False	GridWorld	SUNY	PartialObsDiscrete	Individual_Q	0.2	0.01	1000000	9
IndivQLearningVar2/1320_132_0	decentralized	False	0	False	GridWorld	SUNY	FullObsDiscrete	Individual_Q	0.2	0.2	1000000	0
IndivQLearningVar2/1321_132_1	decentralized	False	0	False	GridWorld	SUNY	FullObsDiscrete	Individual_Q	0.2	0.2	1000000	1
IndivQLearningVar2/1322_132_2	decentralized	False	0	False	GridWorld	SUNY	FullObsDiscrete	Individual_Q	0.2	0.2	1000000	2
IndivQLearningVar2/1323_132_3	decentralized	False	0	False	GridWorld	SUNY	FullObsDiscrete	Individual_Q	0.2	0.2	1000000	3
IndivQLearningVar2/1324_132_4	decentralized	False	0	False	GridWorld	SUNY	FullObsDiscrete	Individual_Q	0.2	0.2	1000000	4
IndivQLearningVar2/1325_132_5	decentralized	False	0	False	GridWorld	SUNY	FullObsDiscrete	Individual_Q	0.2	0.2	1000000	5
IndivQLearningVar2/1326_132_6	decentralized	False	0	False	GridWorld	SUNY	FullObsDiscrete	Individual_Q	0.2	0.2	1000000	6
IndivQLearningVar2/1327_132_7	decentralized	False	0	False	GridWorld	SUNY	FullObsDiscrete	Individual_Q	0.2	0.2	1000000	7
IndivQLearningVar2/1328_132_8	decentralized	False	0	False	GridWorld	SUNY	FullObsDiscrete	Individual_Q	0.2	0.2	1000000	8
IndivQLearningVar2/1329_132_9	decentralized	False	0	False	GridWorld	SUNY	FullObsDiscrete	Individual_Q	0.2	0.2	1000000	9
IndivQLearningVar2/1330_133_0	decentralized	True	-10	False	GridWorld	SUNY	FullObsDiscrete	Individual_Q	0.2	0.2	1000000	0
IndivQLearningVar2/1331_133_1	decentralized	True	-10	False	GridWorld	SUNY	FullObsDiscrete	Individual_Q	0.2	0.2	1000000	1
IndivQLearningVar2/1332_133_2	decentralized	True	-10	False	GridWorld	SUNY	FullObsDiscrete	Individual_Q	0.2	0.2	1000000	2
IndivQLearningVar2/1333_133_3	decentralized	True	-10	False	GridWorld	SUNY	FullObsDiscrete	Individual_Q	0.2	0.2	1000000	3
IndivQLearningVar2/1334_133_4	decentralized	True	-10	False	GridWorld	SUNY	FullObsDiscrete	Individual_Q	0.2	0.2	1000000	4
IndivQLearningVar2/1335_133_5	decentralized	True	-10	False	GridWorld	SUNY	FullObsDiscrete	Individual_Q	0.2	0.2	1000000	5
IndivQLearningVar2/1336_133_6	decentralized	True	-10	False	GridWorld	SUNY	FullObsDiscrete	Individual_Q	0.2	0.2	1000000	6
IndivQLearningVar2/1337_133_7	decentralized	True	-10	False	GridWorld	SUNY	FullObsDiscrete	Individual_Q	0.2	0.2	1000000	7
IndivQLearningVar2/1338_133_8	decentralized	True	-10	False	GridWorld	SUNY	FullObsDiscrete	Individual_Q	0.2	0.2	1000000	8
IndivQLearningVar2/1339_133_9	decentralized	True	-10	False	GridWorld	SUNY	FullObsDiscrete	Individual_Q	0.2	0.2	1000000	9
IndivQLearningVar2/1340_134_0	decentralized	False	0	False	GridWorld	SUNY	FullObsDiscrete	Individual_Q	0.2	0.01	1000000	0
IndivQLearningVar2/1341_134_1	decentralized	False	0	False	GridWorld	SUNY	FullObsDiscrete	Individual_Q	0.2	0.01	1000000	1
IndivQLearningVar2/1342_134_2	decentralized	False	0	False	GridWorld	SUNY	FullObsDiscrete	Individual_Q	0.2	0.01	1000000	2
IndivQLearningVar2/1343_134_3	decentralized	False	0	False	GridWorld	SUNY	FullObsDiscrete	Individual_Q	0.2	0.01	1000000	3
IndivQLearningVar2/1344_134_4	decentralized	False	0	False	GridWorld	SUNY	FullObsDiscrete	Individual_Q	0.2	0.01	1000000	4
IndivQLearningVar2/1345_134_5	decentralized	False	0	False	GridWorld	SUNY	FullObsDiscrete	Individual_Q	0.2	0.01	1000000	5
IndivQLearningVar2/1346_134_6	decentralized	False	0	False	GridWorld	SUNY	FullObsDiscrete	Individual_Q	0.2	0.01	1000000	6
IndivQLearningVar2/1347_134_7	decentralized	False	0	False	GridWorld	SUNY	FullObsDiscrete	Individual_Q	0.2	0.01	1000000	7
IndivQLearningVar2/1348_134_8	decentralized	False	0	False	GridWorld	SUNY	FullObsDiscrete	Individual_Q	0.2	0.01	1000000	8
IndivQLearningVar2/1349_134_9	decentralized	False	0	False	GridWorld	SUNY	FullObsDiscrete	Individual_Q	0.2	0.01	1000000	9
IndivQLearningVar2/1350_135_0	decentralized	True	-10	False	GridWorld	SUNY	FullObsDiscrete	Individual_Q	0.2	0.01	1000000	0
IndivQLearningVar2/1351_135_1	decentralized	True	-10	False	GridWorld	SUNY	FullObsDiscrete	Individual_Q	0.2	0.01	1000000	1
IndivQLearningVar2/1352_135_2	decentralized	True	-10	False	GridWorld	SUNY	FullObsDiscrete	Individual_Q	0.2	0.01	1000000	2
IndivQLearningVar2/1353_135_3	decentralized	True	-10	False	GridWorld	SUNY	FullObsDiscrete	Individual_Q	0.2	0.01	1000000	3
IndivQLearningVar2/1354_135_4	decentralized	True	-10	False	GridWorld	SUNY	FullObsDiscrete	Individual_Q	0.2	0.01	1000000	4
IndivQLearningVar2/1355_135_5	decentralized	True	-10	False	GridWorld	SUNY	FullObsDiscrete	Individual_Q	0.2	0.01	1000000	5
IndivQLearningVar2/1356_135_6	decentralized	True	-10	False	GridWorld	SUNY	FullObsDiscrete	Individual_Q	0.2	0.01	1000000	6
IndivQLearningVar2/1357_135_7	decentralized	True	-10	False	GridWorld	SUNY	FullObsDiscrete	Individual_Q	0.2	0.01	1000000	7
IndivQLearningVar2/1358_135_8	decentralized	True	-10	False	GridWorld	SUNY	FullObsDiscrete	Individual_Q	0.2	0.01	1000000	8
IndivQLearningVar2/1359_135_9	decentralized	True	-10	False	GridWorld	SUNY	FullObsDiscrete	Individual_Q	0.2	0.01	1000000	9
IndivQLearningVar2/1360_136_0	none	False	0	False	GridWorld	SUNY	PartialObsDiscrete	Individual_Q	0.2	0.2	1000000	0
IndivQLearningVar2/1361_136_1	none	False	0	False	GridWorld	SUNY	PartialObsDiscrete	Individual_Q	0.2	0.2	1000000	1
IndivQLearningVar2/1362_136_2	none	False	0	False	GridWorld	SUNY	PartialObsDiscrete	Individual_Q	0.2	0.2	1000000	2
IndivQLearningVar2/1363_136_3	none	False	0	False	GridWorld	SUNY	PartialObsDiscrete	Individual_Q	0.2	0.2	1000000	3
IndivQLearningVar2/1364_136_4	none	False	0	False	GridWorld	SUNY	PartialObsDiscrete	Individual_Q	0.2	0.2	1000000	4
IndivQLearningVar2/1365_136_5	none	False	0	False	GridWorld	SUNY	PartialObsDiscrete	Individual_Q	0.2	0.2	1000000	5
IndivQLearningVar2/1366_136_6	none	False	0	False	GridWorld	SUNY	PartialObsDiscrete	Individual_Q	0.2	0.2	1000000	6
IndivQLearningVar2/1367_136_7	none	False	0	False	GridWorld	SUNY	PartialObsDiscrete	Individual_Q	0.2	0.2	1000000	7
IndivQLearningVar2/1368_136_8	none	False	0	False	GridWorld	SUNY	PartialObsDiscrete	Individual_Q	0.2	0.2	1000000	8
IndivQLearningVar2/1369_136_9	none	False	0	False	GridWorld	SUNY	PartialObsDiscrete	Individual_Q	0.2	0.2	1000000	9
IndivQLearningVar2/1370_137_0	none	True	-10	False	GridWorld	SUNY	PartialObsDiscrete	Individual_Q	0.2	0.2	1000000	0
IndivQLearningVar2/1371_137_1	none	True	-10	False	GridWorld	SUNY	PartialObsDiscrete	Individual_Q	0.2	0.2	1000000	1
IndivQLearningVar2/1372_137_2	none	True	-10	False	GridWorld	SUNY	PartialObsDiscrete	Individual_Q	0.2	0.2	1000000	2
IndivQLearningVar2/1373_137_3	none	True	-10	False	GridWorld	SUNY	PartialObsDiscrete	Individual_Q	0.2	0.2	1000000	3
IndivQLearningVar2/1374_137_4	none	True	-10	False	GridWorld	SUNY	PartialObsDiscrete	Individual_Q	0.2	0.2	1000000	4
IndivQLearningVar2/1375_137_5	none	True	-10	False	GridWorld	SUNY	PartialObsDiscrete	Individual_Q	0.2	0.2	1000000	5
IndivQLearningVar2/1376_137_6	none	True	-10	False	GridWorld	SUNY	PartialObsDiscrete	Individual_Q	0.2	0.2	1000000	6
IndivQLearningVar2/1377_137_7	none	True	-10	False	GridWorld	SUNY	PartialObsDiscrete	Individual_Q	0.2	0.2	1000000	7
IndivQLearningVar2/1378_137_8	none	True	-10	False	GridWorld	SUNY	PartialObsDiscrete	Individual_Q	0.2	0.2	1000000	8
IndivQLearningVar2/1379_137_9	none	True	-10	False	GridWorld	SUNY	PartialObsDiscrete	Individual_Q	0.2	0.2	1000000	9
IndivQLearningVar2/1380_138_0	none	False	0	False	GridWorld	SUNY	PartialObsDiscrete	Individual_Q	0.2	0.01	1000000	0
IndivQLearningVar2/1381_138_1	none	False	0	False	GridWorld	SUNY	PartialObsDiscrete	Individual_Q	0.2	0.01	1000000	1
IndivQLearningVar2/1382_138_2	none	False	0	False	GridWorld	SUNY	PartialObsDiscrete	Individual_Q	0.2	0.01	1000000	2
IndivQLearningVar2/1383_138_3	none	False	0	False	GridWorld	SUNY	PartialObsDiscrete	Individual_Q	0.2	0.01	1000000	3
IndivQLearningVar2/1384_138_4	none	False	0	False	GridWorld	SUNY	PartialObsDiscrete	Individual_Q	0.2	0.01	1000000	4
IndivQLearningVar2/1385_138_5	none	False	0	False	GridWorld	SUNY	PartialObsDiscrete	Individual_Q	0.2	0.01	1000000	5
IndivQLearningVar2/1386_138_6	none	False	0	False	GridWorld	SUNY	PartialObsDiscrete	Individual_Q	0.2	0.01	1000000	6
IndivQLearningVar2/1387_138_7	none	False	0	False	GridWorld	SUNY	PartialObsDiscrete	Individual_Q	0.2	0.01	1000000	7
IndivQLearningVar2/1388_138_8	none	False	0	False	GridWorld	SUNY	PartialObsDiscrete	Individual_Q	0.2	0.01	1000000	8
IndivQLearningVar2/1389_138_9	none	False	0	False	GridWorld	SUNY	PartialObsDiscrete	Individual_Q	0.2	0.01	1000000	9
IndivQLearningVar2/1390_139_0	none	True	-10	False	GridWorld	SUNY	PartialObsDiscrete	Individual_Q	0.2	0.01	1000000	0
IndivQLearningVar2/1391_139_1	none	True	-10	False	GridWorld	SUNY	PartialObsDiscrete	Individual_Q	0.2	0.01	1000000	1
IndivQLearningVar2/1392_139_2	none	True	-10	False	GridWorld	SUNY	PartialObsDiscrete	Individual_Q	0.2	0.01	1000000	2
IndivQLearningVar2/1393_139_3	none	True	-10	False	GridWorld	SUNY	PartialObsDiscrete	Individual_Q	0.2	0.01	1000000	3
IndivQLearningVar2/1394_139_4	none	True	-10	False	GridWorld	SUNY	PartialObsDiscrete	Individual_Q	0.2	0.01	1000000	4
IndivQLearningVar2/1395_139_5	none	True	-10	False	GridWorld	SUNY	PartialObsDiscrete	Individual_Q	0.2	0.01	1000000	5
IndivQLearningVar2/1396_139_6	none	True	-10	False	GridWorld	SUNY	PartialObsDiscrete	Individual_Q	0.2	0.01	1000000	6
IndivQLearningVar2/1397_139_7	none	True	-10	False	GridWorld	SUNY	PartialObsDiscrete	Individual_Q	0.2	0.01	1000000	7
IndivQLearningVar2/1398_139_8	none	True	-10	False	GridWorld	SUNY	PartialObsDiscrete	Individual_Q	0.2	0.01	1000000	8
IndivQLearningVar2/1399_139_9	none	True	-10	False	GridWorld	SUNY	PartialObsDiscrete	Individual_Q	0.2	0.01	1000000	9
IndivQLearningVar2/1400_140_0	none	False	0	False	GridWorld	SUNY	FullObsDiscrete	Individual_Q	0.2	0.2	1000000	0
IndivQLearningVar2/1401_140_1	none	False	0	False	GridWorld	SUNY	FullObsDiscrete	Individual_Q	0.2	0.2	1000000	1
IndivQLearningVar2/1402_140_2	none	False	0	False	GridWorld	SUNY	FullObsDiscrete	Individual_Q	0.2	0.2	1000000	2
IndivQLearningVar2/1403_140_3	none	False	0	False	GridWorld	SUNY	FullObsDiscrete	Individual_Q	0.2	0.2	1000000	3
IndivQLearningVar2/1404_140_4	none	False	0	False	GridWorld	SUNY	FullObsDiscrete	Individual_Q	0.2	0.2	1000000	4
IndivQLearningVar2/1405_140_5	none	False	0	False	GridWorld	SUNY	FullObsDiscrete	Individual_Q	0.2	0.2	1000000	5
IndivQLearningVar2/1406_140_6	none	False	0	False	GridWorld	SUNY	FullObsDiscrete	Individual_Q	0.2	0.2	1000000	6
IndivQLearningVar2/1407_140_7	none	False	0	False	GridWorld	SUNY	FullObsDiscrete	Individual_Q	0.2	0.2	1000000	7
IndivQLearningVar2/1408_140_8	none	False	0	False	GridWorld	SUNY	FullObsDiscrete	Individual_Q	0.2	0.2	1000000	8
IndivQLearningVar2/1409_140_9	none	False	0	False	GridWorld	SUNY	FullObsDiscrete	Individual_Q	0.2	0.2	1000000	9
IndivQLearningVar2/1410_141_0	none	True	-10	False	GridWorld	SUNY	FullObsDiscrete	Individual_Q	0.2	0.2	1000000	0
IndivQLearningVar2/1411_141_1	none	True	-10	False	GridWorld	SUNY	FullObsDiscrete	Individual_Q	0.2	0.2	1000000	1
IndivQLearningVar2/1412_141_2	none	True	-10	False	GridWorld	SUNY	FullObsDiscrete	Individual_Q	0.2	0.2	1000000	2
IndivQLearningVar2/1413_141_3	none	True	-10	False	GridWorld	SUNY	FullObsDiscrete	Individual_Q	0.2	0.2	1000000	3
IndivQLearningVar2/1414_141_4	none	True	-10	False	GridWorld	SUNY	FullObsDiscrete	Individual_Q	0.2	0.2	1000000	4
IndivQLearningVar2/1415_141_5	none	True	-10	False	GridWorld	SUNY	FullObsDiscrete	Individual_Q	0.2	0.2	1000000	5
IndivQLearningVar2/1416_141_6	none	True	-10	False	GridWorld	SUNY	FullObsDiscrete	Individual_Q	0.2	0.2	1000000	6
IndivQLearningVar2/1417_141_7	none	True	-10	False	GridWorld	SUNY	FullObsDiscrete	Individual_Q	0.2	0.2	1000000	7
IndivQLearningVar2/1418_141_8	none	True	-10	False	GridWorld	SUNY	FullObsDiscrete	Individual_Q	0.2	0.2	1000000	8
IndivQLearningVar2/1419_141_9	none	True	-10	False	GridWorld	SUNY	FullObsDiscrete	Individual_Q	0.2	0.2	1000000	9
IndivQLearningVar2/1420_142_0	none	False	0	False	GridWorld	SUNY	FullObsDiscrete	Individual_Q	0.2	0.01	1000000	0
IndivQLearningVar2/1421_142_1	none	False	0	False	GridWorld	SUNY	FullObsDiscrete	Individual_Q	0.2	0.01	1000000	1
IndivQLearningVar2/1422_142_2	none	False	0	False	GridWorld	SUNY	FullObsDiscrete	Individual_Q	0.2	0.01	1000000	2
IndivQLearningVar2/1423_142_3	none	False	0	False	GridWorld	SUNY	FullObsDiscrete	Individual_Q	0.2	0.01	1000000	3
IndivQLearningVar2/1424_142_4	none	False	0	False	GridWorld	SUNY	FullObsDiscrete	Individual_Q	0.2	0.01	1000000	4
IndivQLearningVar2/1425_142_5	none	False	0	False	GridWorld	SUNY	FullObsDiscrete	Individual_Q	0.2	0.01	1000000	5
IndivQLearningVar2/1426_142_6	none	False	0	False	GridWorld	SUNY	FullObsDiscrete	Individual_Q	0.2	0.01	1000000	6
IndivQLearningVar2/1427_142_7	none	False	0	False	GridWorld	SUNY	FullObsDiscrete	Individual_Q	0.2	0.01	1000000	7
IndivQLearningVar2/1428_142_8	none	False	0	False	GridWorld	SUNY	FullObsDiscrete	Individual_Q	0.2	0.01	1000000	8
IndivQLearningVar2/1429_142_9	none	False	0	False	GridWorld	SUNY	FullObsDiscrete	Individual_Q	0.2	0.01	1000000	9
IndivQLearningVar2/1430_143_0	none	True	-10	False	GridWorld	SUNY	FullObsDiscrete	Individual_Q	0.2	0.01	1000000	0
IndivQLearningVar2/1431_143_1	none	True	-10	False	GridWorld	SUNY	FullObsDiscrete	Individual_Q	0.2	0.01	1000000	1
IndivQLearningVar2/1432_143_2	none	True	-10	False	GridWorld	SUNY	FullObsDiscrete	Individual_Q	0.2	0.01	1000000	2
IndivQLearningVar2/1433_143_3	none	True	-10	False	GridWorld	SUNY	FullObsDiscrete	Individual_Q	0.2	0.01	1000000	3
IndivQLearningVar2/1434_143_4	none	True	-10	False	GridWorld	SUNY	FullObsDiscrete	Individual_Q	0.2	0.01	1000000	4
IndivQLearningVar2/1435_143_5	none	True	-10	False	GridWorld	SUNY	FullObsDiscrete	Individual_Q	0.2	0.01	1000000	5
IndivQLearningVar2/1436_143_6	none	True	-10	False	GridWorld	SUNY	FullObsDiscrete	Individual_Q	0.2	0.01	1000000	6
IndivQLearningVar2/1437_143_7	none	True	-10	False	GridWorld	SUNY	FullObsDiscrete	Individual_Q	0.2	0.01	1000000	7
IndivQLearningVar2/1438_143_8	none	True	-10	False	GridWorld	SUNY	FullObsDiscrete	Individual_Q	0.2	0.01	1000000	8
IndivQLearningVar2/1439_143_9	none	True	-10	False	GridWorld	SUNY	FullObsDiscrete	Individual_Q	0.2	0.01	1000000	9
IndivQLearningVar2/1440_144_0	centralized	False	0	True	GridWorld	MIT	PartialObsDiscrete	Individual_Q	0.2	0.2	1000000	0
IndivQLearningVar2/1441_144_1	centralized	False	0	True	GridWorld	MIT	PartialObsDiscrete	Individual_Q	0.2	0.2	1000000	1
IndivQLearningVar2/1442_144_2	centralized	False	0	True	GridWorld	MIT	PartialObsDiscrete	Individual_Q	0.2	0.2	1000000	2
IndivQLearningVar2/1443_144_3	centralized	False	0	True	GridWorld	MIT	PartialObsDiscrete	Individual_Q	0.2	0.2	1000000	3
IndivQLearningVar2/1444_144_4	centralized	False	0	True	GridWorld	MIT	PartialObsDiscrete	Individual_Q	0.2	0.2	1000000	4
IndivQLearningVar2/1445_144_5	centralized	False	0	True	GridWorld	MIT	PartialObsDiscrete	Individual_Q	0.2	0.2	1000000	5
IndivQLearningVar2/1446_144_6	centralized	False	0	True	GridWorld	MIT	PartialObsDiscrete	Individual_Q	0.2	0.2	1000000	6
IndivQLearningVar2/1447_144_7	centralized	False	0	True	GridWorld	MIT	PartialObsDiscrete	Individual_Q	0.2	0.2	1000000	7
IndivQLearningVar2/1448_144_8	centralized	False	0	True	GridWorld	MIT	PartialObsDiscrete	Individual_Q	0.2	0.2	1000000	8
IndivQLearningVar2/1449_144_9	centralized	False	0	True	GridWorld	MIT	PartialObsDiscrete	Individual_Q	0.2	0.2	1000000	9
IndivQLearningVar2/1450_145_0	centralized	True	-10	True	GridWorld	MIT	PartialObsDiscrete	Individual_Q	0.2	0.2	1000000	0
IndivQLearningVar2/1451_145_1	centralized	True	-10	True	GridWorld	MIT	PartialObsDiscrete	Individual_Q	0.2	0.2	1000000	1
IndivQLearningVar2/1452_145_2	centralized	True	-10	True	GridWorld	MIT	PartialObsDiscrete	Individual_Q	0.2	0.2	1000000	2
IndivQLearningVar2/1453_145_3	centralized	True	-10	True	GridWorld	MIT	PartialObsDiscrete	Individual_Q	0.2	0.2	1000000	3
IndivQLearningVar2/1454_145_4	centralized	True	-10	True	GridWorld	MIT	PartialObsDiscrete	Individual_Q	0.2	0.2	1000000	4
IndivQLearningVar2/1455_145_5	centralized	True	-10	True	GridWorld	MIT	PartialObsDiscrete	Individual_Q	0.2	0.2	1000000	5
IndivQLearningVar2/1456_145_6	centralized	True	-10	True	GridWorld	MIT	PartialObsDiscrete	Individual_Q	0.2	0.2	1000000	6
IndivQLearningVar2/1457_145_7	centralized	True	-10	True	GridWorld	MIT	PartialObsDiscrete	Individual_Q	0.2	0.2	1000000	7
IndivQLearningVar2/1458_145_8	centralized	True	-10	True	GridWorld	MIT	PartialObsDiscrete	Individual_Q	0.2	0.2	1000000	8
IndivQLearningVar2/1459_145_9	centralized	True	-10	True	GridWorld	MIT	PartialObsDiscrete	Individual_Q	0.2	0.2	1000000	9
IndivQLearningVar2/1460_146_0	centralized	False	0	True	GridWorld	MIT	PartialObsDiscrete	Individual_Q	0.2	0.01	1000000	0
IndivQLearningVar2/1461_146_1	centralized	False	0	True	GridWorld	MIT	PartialObsDiscrete	Individual_Q	0.2	0.01	1000000	1
IndivQLearningVar2/1462_146_2	centralized	False	0	True	GridWorld	MIT	PartialObsDiscrete	Individual_Q	0.2	0.01	1000000	2
IndivQLearningVar2/1463_146_3	centralized	False	0	True	GridWorld	MIT	PartialObsDiscrete	Individual_Q	0.2	0.01	1000000	3
IndivQLearningVar2/1464_146_4	centralized	False	0	True	GridWorld	MIT	PartialObsDiscrete	Individual_Q	0.2	0.01	1000000	4
IndivQLearningVar2/1465_146_5	centralized	False	0	True	GridWorld	MIT	PartialObsDiscrete	Individual_Q	0.2	0.01	1000000	5
IndivQLearningVar2/1466_146_6	centralized	False	0	True	GridWorld	MIT	PartialObsDiscrete	Individual_Q	0.2	0.01	1000000	6
IndivQLearningVar2/1467_146_7	centralized	False	0	True	GridWorld	MIT	PartialObsDiscrete	Individual_Q	0.2	0.01	1000000	7
IndivQLearningVar2/1468_146_8	centralized	False	0	True	GridWorld	MIT	PartialObsDiscrete	Individual_Q	0.2	0.01	1000000	8
IndivQLearningVar2/1469_146_9	centralized	False	0	True	GridWorld	MIT	PartialObsDiscrete	Individual_Q	0.2	0.01	1000000	9
IndivQLearningVar2/1470_147_0	centralized	True	-10	True	GridWorld	MIT	PartialObsDiscrete	Individual_Q	0.2	0.01	1000000	0
IndivQLearningVar2/1471_147_1	centralized	True	-10	True	GridWorld	MIT	PartialObsDiscrete	Individual_Q	0.2	0.01	1000000	1
IndivQLearningVar2/1472_147_2	centralized	True	-10	True	GridWorld	MIT	PartialObsDiscrete	Individual_Q	0.2	0.01	1000000	2
IndivQLearningVar2/1473_147_3	centralized	True	-10	True	GridWorld	MIT	PartialObsDiscrete	Individual_Q	0.2	0.01	1000000	3
IndivQLearningVar2/1474_147_4	centralized	True	-10	True	GridWorld	MIT	PartialObsDiscrete	Individual_Q	0.2	0.01	1000000	4
IndivQLearningVar2/1475_147_5	centralized	True	-10	True	GridWorld	MIT	PartialObsDiscrete	Individual_Q	0.2	0.01	1000000	5
IndivQLearningVar2/1476_147_6	centralized	True	-10	True	GridWorld	MIT	PartialObsDiscrete	Individual_Q	0.2	0.01	1000000	6
IndivQLearningVar2/1477_147_7	centralized	True	-10	True	GridWorld	MIT	PartialObsDiscrete	Individual_Q	0.2	0.01	1000000	7
IndivQLearningVar2/1478_147_8	centralized	True	-10	True	GridWorld	MIT	PartialObsDiscrete	Individual_Q	0.2	0.01	1000000	8
IndivQLearningVar2/1479_147_9	centralized	True	-10	True	GridWorld	MIT	PartialObsDiscrete	Individual_Q	0.2	0.01	1000000	9
IndivQLearningVar2/1480_148_0	centralized	False	0	True	GridWorld	MIT	FullObsDiscrete	Individual_Q	0.2	0.2	1000000	0
IndivQLearningVar2/1481_148_1	centralized	False	0	True	GridWorld	MIT	FullObsDiscrete	Individual_Q	0.2	0.2	1000000	1
IndivQLearningVar2/1482_148_2	centralized	False	0	True	GridWorld	MIT	FullObsDiscrete	Individual_Q	0.2	0.2	1000000	2
IndivQLearningVar2/1483_148_3	centralized	False	0	True	GridWorld	MIT	FullObsDiscrete	Individual_Q	0.2	0.2	1000000	3
IndivQLearningVar2/1484_148_4	centralized	False	0	True	GridWorld	MIT	FullObsDiscrete	Individual_Q	0.2	0.2	1000000	4
IndivQLearningVar2/1485_148_5	centralized	False	0	True	GridWorld	MIT	FullObsDiscrete	Individual_Q	0.2	0.2	1000000	5
IndivQLearningVar2/1486_148_6	centralized	False	0	True	GridWorld	MIT	FullObsDiscrete	Individual_Q	0.2	0.2	1000000	6
IndivQLearningVar2/1487_148_7	centralized	False	0	True	GridWorld	MIT	FullObsDiscrete	Individual_Q	0.2	0.2	1000000	7
IndivQLearningVar2/1488_148_8	centralized	False	0	True	GridWorld	MIT	FullObsDiscrete	Individual_Q	0.2	0.2	1000000	8
IndivQLearningVar2/1489_148_9	centralized	False	0	True	GridWorld	MIT	FullObsDiscrete	Individual_Q	0.2	0.2	1000000	9
IndivQLearningVar2/1490_149_0	centralized	True	-10	True	GridWorld	MIT	FullObsDiscrete	Individual_Q	0.2	0.2	1000000	0
IndivQLearningVar2/1491_149_1	centralized	True	-10	True	GridWorld	MIT	FullObsDiscrete	Individual_Q	0.2	0.2	1000000	1
IndivQLearningVar2/1492_149_2	centralized	True	-10	True	GridWorld	MIT	FullObsDiscrete	Individual_Q	0.2	0.2	1000000	2
IndivQLearningVar2/1493_149_3	centralized	True	-10	True	GridWorld	MIT	FullObsDiscrete	Individual_Q	0.2	0.2	1000000	3
IndivQLearningVar2/1494_149_4	centralized	True	-10	True	GridWorld	MIT	FullObsDiscrete	Individual_Q	0.2	0.2	1000000	4
IndivQLearningVar2/1495_149_5	centralized	True	-10	True	GridWorld	MIT	FullObsDiscrete	Individual_Q	0.2	0.2	1000000	5
IndivQLearningVar2/1496_149_6	centralized	True	-10	True	GridWorld	MIT	FullObsDiscrete	Individual_Q	0.2	0.2	1000000	6
IndivQLearningVar2/1497_149_7	centralized	True	-10	True	GridWorld	MIT	FullObsDiscrete	Individual_Q	0.2	0.2	1000000	7
IndivQLearningVar2/1498_149_8	centralized	True	-10	True	GridWorld	MIT	FullObsDiscrete	Individual_Q	0.2	0.2	1000000	8
IndivQLearningVar2/1499_149_9	centralized	True	-10	True	GridWorld	MIT	FullObsDiscrete	Individual_Q	0.2	0.2	1000000	9
IndivQLearningVar2/1500_150_0	centralized	False	0	True	GridWorld	MIT	FullObsDiscrete	Individual_Q	0.2	0.01	1000000	0
IndivQLearningVar2/1501_150_1	centralized	False	0	True	GridWorld	MIT	FullObsDiscrete	Individual_Q	0.2	0.01	1000000	1
IndivQLearningVar2/1502_150_2	centralized	False	0	True	GridWorld	MIT	FullObsDiscrete	Individual_Q	0.2	0.01	1000000	2
IndivQLearningVar2/1503_150_3	centralized	False	0	True	GridWorld	MIT	FullObsDiscrete	Individual_Q	0.2	0.01	1000000	3
IndivQLearningVar2/1504_150_4	centralized	False	0	True	GridWorld	MIT	FullObsDiscrete	Individual_Q	0.2	0.01	1000000	4
IndivQLearningVar2/1505_150_5	centralized	False	0	True	GridWorld	MIT	FullObsDiscrete	Individual_Q	0.2	0.01	1000000	5
IndivQLearningVar2/1506_150_6	centralized	False	0	True	GridWorld	MIT	FullObsDiscrete	Individual_Q	0.2	0.01	1000000	6
IndivQLearningVar2/1507_150_7	centralized	False	0	True	GridWorld	MIT	FullObsDiscrete	Individual_Q	0.2	0.01	1000000	7
IndivQLearningVar2/1508_150_8	centralized	False	0	True	GridWorld	MIT	FullObsDiscrete	Individual_Q	0.2	0.01	1000000	8
IndivQLearningVar2/1509_150_9	centralized	False	0	True	GridWorld	MIT	FullObsDiscrete	Individual_Q	0.2	0.01	1000000	9
IndivQLearningVar2/1510_151_0	centralized	True	-10	True	GridWorld	MIT	FullObsDiscrete	Individual_Q	0.2	0.01	1000000	0
IndivQLearningVar2/1511_151_1	centralized	True	-10	True	GridWorld	MIT	FullObsDiscrete	Individual_Q	0.2	0.01	1000000	1
IndivQLearningVar2/1512_151_2	centralized	True	-10	True	GridWorld	MIT	FullObsDiscrete	Individual_Q	0.2	0.01	1000000	2
IndivQLearningVar2/1513_151_3	centralized	True	-10	True	GridWorld	MIT	FullObsDiscrete	Individual_Q	0.2	0.01	1000000	3
IndivQLearningVar2/1514_151_4	centralized	True	-10	True	GridWorld	MIT	FullObsDiscrete	Individual_Q	0.2	0.01	1000000	4
IndivQLearningVar2/1515_151_5	centralized	True	-10	True	GridWorld	MIT	FullObsDiscrete	Individual_Q	0.2	0.01	1000000	5
IndivQLearningVar2/1516_151_6	centralized	True	-10	True	GridWorld	MIT	FullObsDiscrete	Individual_Q	0.2	0.01	1000000	6
IndivQLearningVar2/1517_151_7	centralized	True	-10	True	GridWorld	MIT	FullObsDiscrete	Individual_Q	0.2	0.01	1000000	7
IndivQLearningVar2/1518_151_8	centralized	True	-10	True	GridWorld	MIT	FullObsDiscrete	Individual_Q	0.2	0.01	1000000	8
IndivQLearningVar2/1519_151_9	centralized	True	-10	True	GridWorld	MIT	FullObsDiscrete	Individual_Q	0.2	0.01	1000000	9
IndivQLearningVar2/1520_152_0	decentralized	False	0	True	GridWorld	MIT	PartialObsDiscrete	Individual_Q	0.2	0.2	1000000	0
IndivQLearningVar2/1521_152_1	decentralized	False	0	True	GridWorld	MIT	PartialObsDiscrete	Individual_Q	0.2	0.2	1000000	1
IndivQLearningVar2/1522_152_2	decentralized	False	0	True	GridWorld	MIT	PartialObsDiscrete	Individual_Q	0.2	0.2	1000000	2
IndivQLearningVar2/1523_152_3	decentralized	False	0	True	GridWorld	MIT	PartialObsDiscrete	Individual_Q	0.2	0.2	1000000	3
IndivQLearningVar2/1524_152_4	decentralized	False	0	True	GridWorld	MIT	PartialObsDiscrete	Individual_Q	0.2	0.2	1000000	4
IndivQLearningVar2/1525_152_5	decentralized	False	0	True	GridWorld	MIT	PartialObsDiscrete	Individual_Q	0.2	0.2	1000000	5
IndivQLearningVar2/1526_152_6	decentralized	False	0	True	GridWorld	MIT	PartialObsDiscrete	Individual_Q	0.2	0.2	1000000	6
IndivQLearningVar2/1527_152_7	decentralized	False	0	True	GridWorld	MIT	PartialObsDiscrete	Individual_Q	0.2	0.2	1000000	7
IndivQLearningVar2/1528_152_8	decentralized	False	0	True	GridWorld	MIT	PartialObsDiscrete	Individual_Q	0.2	0.2	1000000	8
IndivQLearningVar2/1529_152_9	decentralized	False	0	True	GridWorld	MIT	PartialObsDiscrete	Individual_Q	0.2	0.2	1000000	9
IndivQLearningVar2/1530_153_0	decentralized	True	-10	True	GridWorld	MIT	PartialObsDiscrete	Individual_Q	0.2	0.2	1000000	0
IndivQLearningVar2/1531_153_1	decentralized	True	-10	True	GridWorld	MIT	PartialObsDiscrete	Individual_Q	0.2	0.2	1000000	1
IndivQLearningVar2/1532_153_2	decentralized	True	-10	True	GridWorld	MIT	PartialObsDiscrete	Individual_Q	0.2	0.2	1000000	2
IndivQLearningVar2/1533_153_3	decentralized	True	-10	True	GridWorld	MIT	PartialObsDiscrete	Individual_Q	0.2	0.2	1000000	3
IndivQLearningVar2/1534_153_4	decentralized	True	-10	True	GridWorld	MIT	PartialObsDiscrete	Individual_Q	0.2	0.2	1000000	4
IndivQLearningVar2/1535_153_5	decentralized	True	-10	True	GridWorld	MIT	PartialObsDiscrete	Individual_Q	0.2	0.2	1000000	5
IndivQLearningVar2/1536_153_6	decentralized	True	-10	True	GridWorld	MIT	PartialObsDiscrete	Individual_Q	0.2	0.2	1000000	6
IndivQLearningVar2/1537_153_7	decentralized	True	-10	True	GridWorld	MIT	PartialObsDiscrete	Individual_Q	0.2	0.2	1000000	7
IndivQLearningVar2/1538_153_8	decentralized	True	-10	True	GridWorld	MIT	PartialObsDiscrete	Individual_Q	0.2	0.2	1000000	8
IndivQLearningVar2/1539_153_9	decentralized	True	-10	True	GridWorld	MIT	PartialObsDiscrete	Individual_Q	0.2	0.2	1000000	9
IndivQLearningVar2/1540_154_0	decentralized	False	0	True	GridWorld	MIT	PartialObsDiscrete	Individual_Q	0.2	0.01	1000000	0
IndivQLearningVar2/1541_154_1	decentralized	False	0	True	GridWorld	MIT	PartialObsDiscrete	Individual_Q	0.2	0.01	1000000	1
IndivQLearningVar2/1542_154_2	decentralized	False	0	True	GridWorld	MIT	PartialObsDiscrete	Individual_Q	0.2	0.01	1000000	2
IndivQLearningVar2/1543_154_3	decentralized	False	0	True	GridWorld	MIT	PartialObsDiscrete	Individual_Q	0.2	0.01	1000000	3
IndivQLearningVar2/1544_154_4	decentralized	False	0	True	GridWorld	MIT	PartialObsDiscrete	Individual_Q	0.2	0.01	1000000	4
IndivQLearningVar2/1545_154_5	decentralized	False	0	True	GridWorld	MIT	PartialObsDiscrete	Individual_Q	0.2	0.01	1000000	5
IndivQLearningVar2/1546_154_6	decentralized	False	0	True	GridWorld	MIT	PartialObsDiscrete	Individual_Q	0.2	0.01	1000000	6
IndivQLearningVar2/1547_154_7	decentralized	False	0	True	GridWorld	MIT	PartialObsDiscrete	Individual_Q	0.2	0.01	1000000	7
IndivQLearningVar2/1548_154_8	decentralized	False	0	True	GridWorld	MIT	PartialObsDiscrete	Individual_Q	0.2	0.01	1000000	8
IndivQLearningVar2/1549_154_9	decentralized	False	0	True	GridWorld	MIT	PartialObsDiscrete	Individual_Q	0.2	0.01	1000000	9
IndivQLearningVar2/1550_155_0	decentralized	True	-10	True	GridWorld	MIT	PartialObsDiscrete	Individual_Q	0.2	0.01	1000000	0
IndivQLearningVar2/1551_155_1	decentralized	True	-10	True	GridWorld	MIT	PartialObsDiscrete	Individual_Q	0.2	0.01	1000000	1
IndivQLearningVar2/1552_155_2	decentralized	True	-10	True	GridWorld	MIT	PartialObsDiscrete	Individual_Q	0.2	0.01	1000000	2
IndivQLearningVar2/1553_155_3	decentralized	True	-10	True	GridWorld	MIT	PartialObsDiscrete	Individual_Q	0.2	0.01	1000000	3
IndivQLearningVar2/1554_155_4	decentralized	True	-10	True	GridWorld	MIT	PartialObsDiscrete	Individual_Q	0.2	0.01	1000000	4
IndivQLearningVar2/1555_155_5	decentralized	True	-10	True	GridWorld	MIT	PartialObsDiscrete	Individual_Q	0.2	0.01	1000000	5
IndivQLearningVar2/1556_155_6	decentralized	True	-10	True	GridWorld	MIT	PartialObsDiscrete	Individual_Q	0.2	0.01	1000000	6
IndivQLearningVar2/1557_155_7	decentralized	True	-10	True	GridWorld	MIT	PartialObsDiscrete	Individual_Q	0.2	0.01	1000000	7
IndivQLearningVar2/1558_155_8	decentralized	True	-10	True	GridWorld	MIT	PartialObsDiscrete	Individual_Q	0.2	0.01	1000000	8
IndivQLearningVar2/1559_155_9	decentralized	True	-10	True	GridWorld	MIT	PartialObsDiscrete	Individual_Q	0.2	0.01	1000000	9
IndivQLearningVar2/1560_156_0	decentralized	False	0	True	GridWorld	MIT	FullObsDiscrete	Individual_Q	0.2	0.2	1000000	0
IndivQLearningVar2/1561_156_1	decentralized	False	0	True	GridWorld	MIT	FullObsDiscrete	Individual_Q	0.2	0.2	1000000	1
IndivQLearningVar2/1562_156_2	decentralized	False	0	True	GridWorld	MIT	FullObsDiscrete	Individual_Q	0.2	0.2	1000000	2
IndivQLearningVar2/1563_156_3	decentralized	False	0	True	GridWorld	MIT	FullObsDiscrete	Individual_Q	0.2	0.2	1000000	3
IndivQLearningVar2/1564_156_4	decentralized	False	0	True	GridWorld	MIT	FullObsDiscrete	Individual_Q	0.2	0.2	1000000	4
IndivQLearningVar2/1565_156_5	decentralized	False	0	True	GridWorld	MIT	FullObsDiscrete	Individual_Q	0.2	0.2	1000000	5
IndivQLearningVar2/1566_156_6	decentralized	False	0	True	GridWorld	MIT	FullObsDiscrete	Individual_Q	0.2	0.2	1000000	6
IndivQLearningVar2/1567_156_7	decentralized	False	0	True	GridWorld	MIT	FullObsDiscrete	Individual_Q	0.2	0.2	1000000	7
IndivQLearningVar2/1568_156_8	decentralized	False	0	True	GridWorld	MIT	FullObsDiscrete	Individual_Q	0.2	0.2	1000000	8
IndivQLearningVar2/1569_156_9	decentralized	False	0	True	GridWorld	MIT	FullObsDiscrete	Individual_Q	0.2	0.2	1000000	9
IndivQLearningVar2/1570_157_0	decentralized	True	-10	True	GridWorld	MIT	FullObsDiscrete	Individual_Q	0.2	0.2	1000000	0
IndivQLearningVar2/1571_157_1	decentralized	True	-10	True	GridWorld	MIT	FullObsDiscrete	Individual_Q	0.2	0.2	1000000	1
IndivQLearningVar2/1572_157_2	decentralized	True	-10	True	GridWorld	MIT	FullObsDiscrete	Individual_Q	0.2	0.2	1000000	2
IndivQLearningVar2/1573_157_3	decentralized	True	-10	True	GridWorld	MIT	FullObsDiscrete	Individual_Q	0.2	0.2	1000000	3
IndivQLearningVar2/1574_157_4	decentralized	True	-10	True	GridWorld	MIT	FullObsDiscrete	Individual_Q	0.2	0.2	1000000	4
IndivQLearningVar2/1575_157_5	decentralized	True	-10	True	GridWorld	MIT	FullObsDiscrete	Individual_Q	0.2	0.2	1000000	5
IndivQLearningVar2/1576_157_6	decentralized	True	-10	True	GridWorld	MIT	FullObsDiscrete	Individual_Q	0.2	0.2	1000000	6
IndivQLearningVar2/1577_157_7	decentralized	True	-10	True	GridWorld	MIT	FullObsDiscrete	Individual_Q	0.2	0.2	1000000	7
IndivQLearningVar2/1578_157_8	decentralized	True	-10	True	GridWorld	MIT	FullObsDiscrete	Individual_Q	0.2	0.2	1000000	8
IndivQLearningVar2/1579_157_9	decentralized	True	-10	True	GridWorld	MIT	FullObsDiscrete	Individual_Q	0.2	0.2	1000000	9
IndivQLearningVar2/1580_158_0	decentralized	False	0	True	GridWorld	MIT	FullObsDiscrete	Individual_Q	0.2	0.01	1000000	0
IndivQLearningVar2/1581_158_1	decentralized	False	0	True	GridWorld	MIT	FullObsDiscrete	Individual_Q	0.2	0.01	1000000	1
IndivQLearningVar2/1582_158_2	decentralized	False	0	True	GridWorld	MIT	FullObsDiscrete	Individual_Q	0.2	0.01	1000000	2
IndivQLearningVar2/1583_158_3	decentralized	False	0	True	GridWorld	MIT	FullObsDiscrete	Individual_Q	0.2	0.01	1000000	3
IndivQLearningVar2/1584_158_4	decentralized	False	0	True	GridWorld	MIT	FullObsDiscrete	Individual_Q	0.2	0.01	1000000	4
IndivQLearningVar2/1585_158_5	decentralized	False	0	True	GridWorld	MIT	FullObsDiscrete	Individual_Q	0.2	0.01	1000000	5
IndivQLearningVar2/1586_158_6	decentralized	False	0	True	GridWorld	MIT	FullObsDiscrete	Individual_Q	0.2	0.01	1000000	6
IndivQLearningVar2/1587_158_7	decentralized	False	0	True	GridWorld	MIT	FullObsDiscrete	Individual_Q	0.2	0.01	1000000	7
IndivQLearningVar2/1588_158_8	decentralized	False	0	True	GridWorld	MIT	FullObsDiscrete	Individual_Q	0.2	0.01	1000000	8
IndivQLearningVar2/1589_158_9	decentralized	False	0	True	GridWorld	MIT	FullObsDiscrete	Individual_Q	0.2	0.01	1000000	9
IndivQLearningVar2/1590_159_0	decentralized	True	-10	True	GridWorld	MIT	FullObsDiscrete	Individual_Q	0.2	0.01	1000000	0
IndivQLearningVar2/1591_159_1	decentralized	True	-10	True	GridWorld	MIT	FullObsDiscrete	Individual_Q	0.2	0.01	1000000	1
IndivQLearningVar2/1592_159_2	decentralized	True	-10	True	GridWorld	MIT	FullObsDiscrete	Individual_Q	0.2	0.01	1000000	2
IndivQLearningVar2/1593_159_3	decentralized	True	-10	True	GridWorld	MIT	FullObsDiscrete	Individual_Q	0.2	0.01	1000000	3
IndivQLearningVar2/1594_159_4	decentralized	True	-10	True	GridWorld	MIT	FullObsDiscrete	Individual_Q	0.2	0.01	1000000	4
IndivQLearningVar2/1595_159_5	decentralized	True	-10	True	GridWorld	MIT	FullObsDiscrete	Individual_Q	0.2	0.01	1000000	5
IndivQLearningVar2/1596_159_6	decentralized	True	-10	True	GridWorld	MIT	FullObsDiscrete	Individual_Q	0.2	0.01	1000000	6
IndivQLearningVar2/1597_159_7	decentralized	True	-10	True	GridWorld	MIT	FullObsDiscrete	Individual_Q	0.2	0.01	1000000	7
IndivQLearningVar2/1598_159_8	decentralized	True	-10	True	GridWorld	MIT	FullObsDiscrete	Individual_Q	0.2	0.01	1000000	8
IndivQLearningVar2/1599_159_9	decentralized	True	-10	True	GridWorld	MIT	FullObsDiscrete	Individual_Q	0.2	0.01	1000000	9
IndivQLearningVar2/1600_160_0	none	False	0	True	GridWorld	MIT	PartialObsDiscrete	Individual_Q	0.2	0.2	1000000	0
IndivQLearningVar2/1601_160_1	none	False	0	True	GridWorld	MIT	PartialObsDiscrete	Individual_Q	0.2	0.2	1000000	1
IndivQLearningVar2/1602_160_2	none	False	0	True	GridWorld	MIT	PartialObsDiscrete	Individual_Q	0.2	0.2	1000000	2
IndivQLearningVar2/1603_160_3	none	False	0	True	GridWorld	MIT	PartialObsDiscrete	Individual_Q	0.2	0.2	1000000	3
IndivQLearningVar2/1604_160_4	none	False	0	True	GridWorld	MIT	PartialObsDiscrete	Individual_Q	0.2	0.2	1000000	4
IndivQLearningVar2/1605_160_5	none	False	0	True	GridWorld	MIT	PartialObsDiscrete	Individual_Q	0.2	0.2	1000000	5
IndivQLearningVar2/1606_160_6	none	False	0	True	GridWorld	MIT	PartialObsDiscrete	Individual_Q	0.2	0.2	1000000	6
IndivQLearningVar2/1607_160_7	none	False	0	True	GridWorld	MIT	PartialObsDiscrete	Individual_Q	0.2	0.2	1000000	7
IndivQLearningVar2/1608_160_8	none	False	0	True	GridWorld	MIT	PartialObsDiscrete	Individual_Q	0.2	0.2	1000000	8
IndivQLearningVar2/1609_160_9	none	False	0	True	GridWorld	MIT	PartialObsDiscrete	Individual_Q	0.2	0.2	1000000	9
IndivQLearningVar2/1610_161_0	none	True	-10	True	GridWorld	MIT	PartialObsDiscrete	Individual_Q	0.2	0.2	1000000	0
IndivQLearningVar2/1611_161_1	none	True	-10	True	GridWorld	MIT	PartialObsDiscrete	Individual_Q	0.2	0.2	1000000	1
IndivQLearningVar2/1612_161_2	none	True	-10	True	GridWorld	MIT	PartialObsDiscrete	Individual_Q	0.2	0.2	1000000	2
IndivQLearningVar2/1613_161_3	none	True	-10	True	GridWorld	MIT	PartialObsDiscrete	Individual_Q	0.2	0.2	1000000	3
IndivQLearningVar2/1614_161_4	none	True	-10	True	GridWorld	MIT	PartialObsDiscrete	Individual_Q	0.2	0.2	1000000	4
IndivQLearningVar2/1615_161_5	none	True	-10	True	GridWorld	MIT	PartialObsDiscrete	Individual_Q	0.2	0.2	1000000	5
IndivQLearningVar2/1616_161_6	none	True	-10	True	GridWorld	MIT	PartialObsDiscrete	Individual_Q	0.2	0.2	1000000	6
IndivQLearningVar2/1617_161_7	none	True	-10	True	GridWorld	MIT	PartialObsDiscrete	Individual_Q	0.2	0.2	1000000	7
IndivQLearningVar2/1618_161_8	none	True	-10	True	GridWorld	MIT	PartialObsDiscrete	Individual_Q	0.2	0.2	1000000	8
IndivQLearningVar2/1619_161_9	none	True	-10	True	GridWorld	MIT	PartialObsDiscrete	Individual_Q	0.2	0.2	1000000	9
IndivQLearningVar2/1620_162_0	none	False	0	True	GridWorld	MIT	PartialObsDiscrete	Individual_Q	0.2	0.01	1000000	0
IndivQLearningVar2/1621_162_1	none	False	0	True	GridWorld	MIT	PartialObsDiscrete	Individual_Q	0.2	0.01	1000000	1
IndivQLearningVar2/1622_162_2	none	False	0	True	GridWorld	MIT	PartialObsDiscrete	Individual_Q	0.2	0.01	1000000	2
IndivQLearningVar2/1623_162_3	none	False	0	True	GridWorld	MIT	PartialObsDiscrete	Individual_Q	0.2	0.01	1000000	3
IndivQLearningVar2/1624_162_4	none	False	0	True	GridWorld	MIT	PartialObsDiscrete	Individual_Q	0.2	0.01	1000000	4
IndivQLearningVar2/1625_162_5	none	False	0	True	GridWorld	MIT	PartialObsDiscrete	Individual_Q	0.2	0.01	1000000	5
IndivQLearningVar2/1626_162_6	none	False	0	True	GridWorld	MIT	PartialObsDiscrete	Individual_Q	0.2	0.01	1000000	6
IndivQLearningVar2/1627_162_7	none	False	0	True	GridWorld	MIT	PartialObsDiscrete	Individual_Q	0.2	0.01	1000000	7
IndivQLearningVar2/1628_162_8	none	False	0	True	GridWorld	MIT	PartialObsDiscrete	Individual_Q	0.2	0.01	1000000	8
IndivQLearningVar2/1629_162_9	none	False	0	True	GridWorld	MIT	PartialObsDiscrete	Individual_Q	0.2	0.01	1000000	9
IndivQLearningVar2/1630_163_0	none	True	-10	True	GridWorld	MIT	PartialObsDiscrete	Individual_Q	0.2	0.01	1000000	0
IndivQLearningVar2/1631_163_1	none	True	-10	True	GridWorld	MIT	PartialObsDiscrete	Individual_Q	0.2	0.01	1000000	1
IndivQLearningVar2/1632_163_2	none	True	-10	True	GridWorld	MIT	PartialObsDiscrete	Individual_Q	0.2	0.01	1000000	2
IndivQLearningVar2/1633_163_3	none	True	-10	True	GridWorld	MIT	PartialObsDiscrete	Individual_Q	0.2	0.01	1000000	3
IndivQLearningVar2/1634_163_4	none	True	-10	True	GridWorld	MIT	PartialObsDiscrete	Individual_Q	0.2	0.01	1000000	4
IndivQLearningVar2/1635_163_5	none	True	-10	True	GridWorld	MIT	PartialObsDiscrete	Individual_Q	0.2	0.01	1000000	5
IndivQLearningVar2/1636_163_6	none	True	-10	True	GridWorld	MIT	PartialObsDiscrete	Individual_Q	0.2	0.01	1000000	6
IndivQLearningVar2/1637_163_7	none	True	-10	True	GridWorld	MIT	PartialObsDiscrete	Individual_Q	0.2	0.01	1000000	7
IndivQLearningVar2/1638_163_8	none	True	-10	True	GridWorld	MIT	PartialObsDiscrete	Individual_Q	0.2	0.01	1000000	8
IndivQLearningVar2/1639_163_9	none	True	-10	True	GridWorld	MIT	PartialObsDiscrete	Individual_Q	0.2	0.01	1000000	9
IndivQLearningVar2/1640_164_0	none	False	0	True	GridWorld	MIT	FullObsDiscrete	Individual_Q	0.2	0.2	1000000	0
IndivQLearningVar2/1641_164_1	none	False	0	True	GridWorld	MIT	FullObsDiscrete	Individual_Q	0.2	0.2	1000000	1
IndivQLearningVar2/1642_164_2	none	False	0	True	GridWorld	MIT	FullObsDiscrete	Individual_Q	0.2	0.2	1000000	2
IndivQLearningVar2/1643_164_3	none	False	0	True	GridWorld	MIT	FullObsDiscrete	Individual_Q	0.2	0.2	1000000	3
IndivQLearningVar2/1644_164_4	none	False	0	True	GridWorld	MIT	FullObsDiscrete	Individual_Q	0.2	0.2	1000000	4
IndivQLearningVar2/1645_164_5	none	False	0	True	GridWorld	MIT	FullObsDiscrete	Individual_Q	0.2	0.2	1000000	5
IndivQLearningVar2/1646_164_6	none	False	0	True	GridWorld	MIT	FullObsDiscrete	Individual_Q	0.2	0.2	1000000	6
IndivQLearningVar2/1647_164_7	none	False	0	True	GridWorld	MIT	FullObsDiscrete	Individual_Q	0.2	0.2	1000000	7
IndivQLearningVar2/1648_164_8	none	False	0	True	GridWorld	MIT	FullObsDiscrete	Individual_Q	0.2	0.2	1000000	8
IndivQLearningVar2/1649_164_9	none	False	0	True	GridWorld	MIT	FullObsDiscrete	Individual_Q	0.2	0.2	1000000	9
IndivQLearningVar2/1650_165_0	none	True	-10	True	GridWorld	MIT	FullObsDiscrete	Individual_Q	0.2	0.2	1000000	0
IndivQLearningVar2/1651_165_1	none	True	-10	True	GridWorld	MIT	FullObsDiscrete	Individual_Q	0.2	0.2	1000000	1
IndivQLearningVar2/1652_165_2	none	True	-10	True	GridWorld	MIT	FullObsDiscrete	Individual_Q	0.2	0.2	1000000	2
IndivQLearningVar2/1653_165_3	none	True	-10	True	GridWorld	MIT	FullObsDiscrete	Individual_Q	0.2	0.2	1000000	3
IndivQLearningVar2/1654_165_4	none	True	-10	True	GridWorld	MIT	FullObsDiscrete	Individual_Q	0.2	0.2	1000000	4
IndivQLearningVar2/1655_165_5	none	True	-10	True	GridWorld	MIT	FullObsDiscrete	Individual_Q	0.2	0.2	1000000	5
IndivQLearningVar2/1656_165_6	none	True	-10	True	GridWorld	MIT	FullObsDiscrete	Individual_Q	0.2	0.2	1000000	6
IndivQLearningVar2/1657_165_7	none	True	-10	True	GridWorld	MIT	FullObsDiscrete	Individual_Q	0.2	0.2	1000000	7
IndivQLearningVar2/1658_165_8	none	True	-10	True	GridWorld	MIT	FullObsDiscrete	Individual_Q	0.2	0.2	1000000	8
IndivQLearningVar2/1659_165_9	none	True	-10	True	GridWorld	MIT	FullObsDiscrete	Individual_Q	0.2	0.2	1000000	9
IndivQLearningVar2/1660_166_0	none	False	0	True	GridWorld	MIT	FullObsDiscrete	Individual_Q	0.2	0.01	1000000	0
IndivQLearningVar2/1661_166_1	none	False	0	True	GridWorld	MIT	FullObsDiscrete	Individual_Q	0.2	0.01	1000000	1
IndivQLearningVar2/1662_166_2	none	False	0	True	GridWorld	MIT	FullObsDiscrete	Individual_Q	0.2	0.01	1000000	2
IndivQLearningVar2/1663_166_3	none	False	0	True	GridWorld	MIT	FullObsDiscrete	Individual_Q	0.2	0.01	1000000	3
IndivQLearningVar2/1664_166_4	none	False	0	True	GridWorld	MIT	FullObsDiscrete	Individual_Q	0.2	0.01	1000000	4
IndivQLearningVar2/1665_166_5	none	False	0	True	GridWorld	MIT	FullObsDiscrete	Individual_Q	0.2	0.01	1000000	5
IndivQLearningVar2/1666_166_6	none	False	0	True	GridWorld	MIT	FullObsDiscrete	Individual_Q	0.2	0.01	1000000	6
IndivQLearningVar2/1667_166_7	none	False	0	True	GridWorld	MIT	FullObsDiscrete	Individual_Q	0.2	0.01	1000000	7
IndivQLearningVar2/1668_166_8	none	False	0	True	GridWorld	MIT	FullObsDiscrete	Individual_Q	0.2	0.01	1000000	8
IndivQLearningVar2/1669_166_9	none	False	0	True	GridWorld	MIT	FullObsDiscrete	Individual_Q	0.2	0.01	1000000	9
IndivQLearningVar2/1670_167_0	none	True	-10	True	GridWorld	MIT	FullObsDiscrete	Individual_Q	0.2	0.01	1000000	0
IndivQLearningVar2/1671_167_1	none	True	-10	True	GridWorld	MIT	FullObsDiscrete	Individual_Q	0.2	0.01	1000000	1
IndivQLearningVar2/1672_167_2	none	True	-10	True	GridWorld	MIT	FullObsDiscrete	Individual_Q	0.2	0.01	1000000	2
IndivQLearningVar2/1673_167_3	none	True	-10	True	GridWorld	MIT	FullObsDiscrete	Individual_Q	0.2	0.01	1000000	3
IndivQLearningVar2/1674_167_4	none	True	-10	True	GridWorld	MIT	FullObsDiscrete	Individual_Q	0.2	0.01	1000000	4
IndivQLearningVar2/1675_167_5	none	True	-10	True	GridWorld	MIT	FullObsDiscrete	Individual_Q	0.2	0.01	1000000	5
IndivQLearningVar2/1676_167_6	none	True	-10	True	GridWorld	MIT	FullObsDiscrete	Individual_Q	0.2	0.01	1000000	6
IndivQLearningVar2/1677_167_7	none	True	-10	True	GridWorld	MIT	FullObsDiscrete	Individual_Q	0.2	0.01	1000000	7
IndivQLearningVar2/1678_167_8	none	True	-10	True	GridWorld	MIT	FullObsDiscrete	Individual_Q	0.2	0.01	1000000	8
IndivQLearningVar2/1679_167_9	none	True	-10	True	GridWorld	MIT	FullObsDiscrete	Individual_Q	0.2	0.01	1000000	9
IndivQLearningVar2/1680_168_0	centralized	False	0	False	GridWorld	MIT	PartialObsDiscrete	Individual_Q	0.2	0.2	1000000	0
IndivQLearningVar2/1681_168_1	centralized	False	0	False	GridWorld	MIT	PartialObsDiscrete	Individual_Q	0.2	0.2	1000000	1
IndivQLearningVar2/1682_168_2	centralized	False	0	False	GridWorld	MIT	PartialObsDiscrete	Individual_Q	0.2	0.2	1000000	2
IndivQLearningVar2/1683_168_3	centralized	False	0	False	GridWorld	MIT	PartialObsDiscrete	Individual_Q	0.2	0.2	1000000	3
IndivQLearningVar2/1684_168_4	centralized	False	0	False	GridWorld	MIT	PartialObsDiscrete	Individual_Q	0.2	0.2	1000000	4
IndivQLearningVar2/1685_168_5	centralized	False	0	False	GridWorld	MIT	PartialObsDiscrete	Individual_Q	0.2	0.2	1000000	5
IndivQLearningVar2/1686_168_6	centralized	False	0	False	GridWorld	MIT	PartialObsDiscrete	Individual_Q	0.2	0.2	1000000	6
IndivQLearningVar2/1687_168_7	centralized	False	0	False	GridWorld	MIT	PartialObsDiscrete	Individual_Q	0.2	0.2	1000000	7
IndivQLearningVar2/1688_168_8	centralized	False	0	False	GridWorld	MIT	PartialObsDiscrete	Individual_Q	0.2	0.2	1000000	8
IndivQLearningVar2/1689_168_9	centralized	False	0	False	GridWorld	MIT	PartialObsDiscrete	Individual_Q	0.2	0.2	1000000	9
IndivQLearningVar2/1690_169_0	centralized	True	-10	False	GridWorld	MIT	PartialObsDiscrete	Individual_Q	0.2	0.2	1000000	0
IndivQLearningVar2/1691_169_1	centralized	True	-10	False	GridWorld	MIT	PartialObsDiscrete	Individual_Q	0.2	0.2	1000000	1
IndivQLearningVar2/1692_169_2	centralized	True	-10	False	GridWorld	MIT	PartialObsDiscrete	Individual_Q	0.2	0.2	1000000	2
IndivQLearningVar2/1693_169_3	centralized	True	-10	False	GridWorld	MIT	PartialObsDiscrete	Individual_Q	0.2	0.2	1000000	3
IndivQLearningVar2/1694_169_4	centralized	True	-10	False	GridWorld	MIT	PartialObsDiscrete	Individual_Q	0.2	0.2	1000000	4
IndivQLearningVar2/1695_169_5	centralized	True	-10	False	GridWorld	MIT	PartialObsDiscrete	Individual_Q	0.2	0.2	1000000	5
IndivQLearningVar2/1696_169_6	centralized	True	-10	False	GridWorld	MIT	PartialObsDiscrete	Individual_Q	0.2	0.2	1000000	6
IndivQLearningVar2/1697_169_7	centralized	True	-10	False	GridWorld	MIT	PartialObsDiscrete	Individual_Q	0.2	0.2	1000000	7
IndivQLearningVar2/1698_169_8	centralized	True	-10	False	GridWorld	MIT	PartialObsDiscrete	Individual_Q	0.2	0.2	1000000	8
IndivQLearningVar2/1699_169_9	centralized	True	-10	False	GridWorld	MIT	PartialObsDiscrete	Individual_Q	0.2	0.2	1000000	9
IndivQLearningVar2/1700_170_0	centralized	False	0	False	GridWorld	MIT	PartialObsDiscrete	Individual_Q	0.2	0.01	1000000	0
IndivQLearningVar2/1701_170_1	centralized	False	0	False	GridWorld	MIT	PartialObsDiscrete	Individual_Q	0.2	0.01	1000000	1
IndivQLearningVar2/1702_170_2	centralized	False	0	False	GridWorld	MIT	PartialObsDiscrete	Individual_Q	0.2	0.01	1000000	2
IndivQLearningVar2/1703_170_3	centralized	False	0	False	GridWorld	MIT	PartialObsDiscrete	Individual_Q	0.2	0.01	1000000	3
IndivQLearningVar2/1704_170_4	centralized	False	0	False	GridWorld	MIT	PartialObsDiscrete	Individual_Q	0.2	0.01	1000000	4
IndivQLearningVar2/1705_170_5	centralized	False	0	False	GridWorld	MIT	PartialObsDiscrete	Individual_Q	0.2	0.01	1000000	5
IndivQLearningVar2/1706_170_6	centralized	False	0	False	GridWorld	MIT	PartialObsDiscrete	Individual_Q	0.2	0.01	1000000	6
IndivQLearningVar2/1707_170_7	centralized	False	0	False	GridWorld	MIT	PartialObsDiscrete	Individual_Q	0.2	0.01	1000000	7
IndivQLearningVar2/1708_170_8	centralized	False	0	False	GridWorld	MIT	PartialObsDiscrete	Individual_Q	0.2	0.01	1000000	8
IndivQLearningVar2/1709_170_9	centralized	False	0	False	GridWorld	MIT	PartialObsDiscrete	Individual_Q	0.2	0.01	1000000	9
IndivQLearningVar2/1710_171_0	centralized	True	-10	False	GridWorld	MIT	PartialObsDiscrete	Individual_Q	0.2	0.01	1000000	0
IndivQLearningVar2/1711_171_1	centralized	True	-10	False	GridWorld	MIT	PartialObsDiscrete	Individual_Q	0.2	0.01	1000000	1
IndivQLearningVar2/1712_171_2	centralized	True	-10	False	GridWorld	MIT	PartialObsDiscrete	Individual_Q	0.2	0.01	1000000	2
IndivQLearningVar2/1713_171_3	centralized	True	-10	False	GridWorld	MIT	PartialObsDiscrete	Individual_Q	0.2	0.01	1000000	3
IndivQLearningVar2/1714_171_4	centralized	True	-10	False	GridWorld	MIT	PartialObsDiscrete	Individual_Q	0.2	0.01	1000000	4
IndivQLearningVar2/1715_171_5	centralized	True	-10	False	GridWorld	MIT	PartialObsDiscrete	Individual_Q	0.2	0.01	1000000	5
IndivQLearningVar2/1716_171_6	centralized	True	-10	False	GridWorld	MIT	PartialObsDiscrete	Individual_Q	0.2	0.01	1000000	6
IndivQLearningVar2/1717_171_7	centralized	True	-10	False	GridWorld	MIT	PartialObsDiscrete	Individual_Q	0.2	0.01	1000000	7
IndivQLearningVar2/1718_171_8	centralized	True	-10	False	GridWorld	MIT	PartialObsDiscrete	Individual_Q	0.2	0.01	1000000	8
IndivQLearningVar2/1719_171_9	centralized	True	-10	False	GridWorld	MIT	PartialObsDiscrete	Individual_Q	0.2	0.01	1000000	9
IndivQLearningVar2/1720_172_0	centralized	False	0	False	GridWorld	MIT	FullObsDiscrete	Individual_Q	0.2	0.2	1000000	0
IndivQLearningVar2/1721_172_1	centralized	False	0	False	GridWorld	MIT	FullObsDiscrete	Individual_Q	0.2	0.2	1000000	1
IndivQLearningVar2/1722_172_2	centralized	False	0	False	GridWorld	MIT	FullObsDiscrete	Individual_Q	0.2	0.2	1000000	2
IndivQLearningVar2/1723_172_3	centralized	False	0	False	GridWorld	MIT	FullObsDiscrete	Individual_Q	0.2	0.2	1000000	3
IndivQLearningVar2/1724_172_4	centralized	False	0	False	GridWorld	MIT	FullObsDiscrete	Individual_Q	0.2	0.2	1000000	4
IndivQLearningVar2/1725_172_5	centralized	False	0	False	GridWorld	MIT	FullObsDiscrete	Individual_Q	0.2	0.2	1000000	5
IndivQLearningVar2/1726_172_6	centralized	False	0	False	GridWorld	MIT	FullObsDiscrete	Individual_Q	0.2	0.2	1000000	6
IndivQLearningVar2/1727_172_7	centralized	False	0	False	GridWorld	MIT	FullObsDiscrete	Individual_Q	0.2	0.2	1000000	7
IndivQLearningVar2/1728_172_8	centralized	False	0	False	GridWorld	MIT	FullObsDiscrete	Individual_Q	0.2	0.2	1000000	8
IndivQLearningVar2/1729_172_9	centralized	False	0	False	GridWorld	MIT	FullObsDiscrete	Individual_Q	0.2	0.2	1000000	9
IndivQLearningVar2/1730_173_0	centralized	True	-10	False	GridWorld	MIT	FullObsDiscrete	Individual_Q	0.2	0.2	1000000	0
IndivQLearningVar2/1731_173_1	centralized	True	-10	False	GridWorld	MIT	FullObsDiscrete	Individual_Q	0.2	0.2	1000000	1
IndivQLearningVar2/1732_173_2	centralized	True	-10	False	GridWorld	MIT	FullObsDiscrete	Individual_Q	0.2	0.2	1000000	2
IndivQLearningVar2/1733_173_3	centralized	True	-10	False	GridWorld	MIT	FullObsDiscrete	Individual_Q	0.2	0.2	1000000	3
IndivQLearningVar2/1734_173_4	centralized	True	-10	False	GridWorld	MIT	FullObsDiscrete	Individual_Q	0.2	0.2	1000000	4
IndivQLearningVar2/1735_173_5	centralized	True	-10	False	GridWorld	MIT	FullObsDiscrete	Individual_Q	0.2	0.2	1000000	5
IndivQLearningVar2/1736_173_6	centralized	True	-10	False	GridWorld	MIT	FullObsDiscrete	Individual_Q	0.2	0.2	1000000	6
IndivQLearningVar2/1737_173_7	centralized	True	-10	False	GridWorld	MIT	FullObsDiscrete	Individual_Q	0.2	0.2	1000000	7
IndivQLearningVar2/1738_173_8	centralized	True	-10	False	GridWorld	MIT	FullObsDiscrete	Individual_Q	0.2	0.2	1000000	8
IndivQLearningVar2/1739_173_9	centralized	True	-10	False	GridWorld	MIT	FullObsDiscrete	Individual_Q	0.2	0.2	1000000	9
IndivQLearningVar2/1740_174_0	centralized	False	0	False	GridWorld	MIT	FullObsDiscrete	Individual_Q	0.2	0.01	1000000	0
IndivQLearningVar2/1741_174_1	centralized	False	0	False	GridWorld	MIT	FullObsDiscrete	Individual_Q	0.2	0.01	1000000	1
IndivQLearningVar2/1742_174_2	centralized	False	0	False	GridWorld	MIT	FullObsDiscrete	Individual_Q	0.2	0.01	1000000	2
IndivQLearningVar2/1743_174_3	centralized	False	0	False	GridWorld	MIT	FullObsDiscrete	Individual_Q	0.2	0.01	1000000	3
IndivQLearningVar2/1744_174_4	centralized	False	0	False	GridWorld	MIT	FullObsDiscrete	Individual_Q	0.2	0.01	1000000	4
IndivQLearningVar2/1745_174_5	centralized	False	0	False	GridWorld	MIT	FullObsDiscrete	Individual_Q	0.2	0.01	1000000	5
IndivQLearningVar2/1746_174_6	centralized	False	0	False	GridWorld	MIT	FullObsDiscrete	Individual_Q	0.2	0.01	1000000	6
IndivQLearningVar2/1747_174_7	centralized	False	0	False	GridWorld	MIT	FullObsDiscrete	Individual_Q	0.2	0.01	1000000	7
IndivQLearningVar2/1748_174_8	centralized	False	0	False	GridWorld	MIT	FullObsDiscrete	Individual_Q	0.2	0.01	1000000	8
IndivQLearningVar2/1749_174_9	centralized	False	0	False	GridWorld	MIT	FullObsDiscrete	Individual_Q	0.2	0.01	1000000	9
IndivQLearningVar2/1750_175_0	centralized	True	-10	False	GridWorld	MIT	FullObsDiscrete	Individual_Q	0.2	0.01	1000000	0
IndivQLearningVar2/1751_175_1	centralized	True	-10	False	GridWorld	MIT	FullObsDiscrete	Individual_Q	0.2	0.01	1000000	1
IndivQLearningVar2/1752_175_2	centralized	True	-10	False	GridWorld	MIT	FullObsDiscrete	Individual_Q	0.2	0.01	1000000	2
IndivQLearningVar2/1753_175_3	centralized	True	-10	False	GridWorld	MIT	FullObsDiscrete	Individual_Q	0.2	0.01	1000000	3
IndivQLearningVar2/1754_175_4	centralized	True	-10	False	GridWorld	MIT	FullObsDiscrete	Individual_Q	0.2	0.01	1000000	4
IndivQLearningVar2/1755_175_5	centralized	True	-10	False	GridWorld	MIT	FullObsDiscrete	Individual_Q	0.2	0.01	1000000	5
IndivQLearningVar2/1756_175_6	centralized	True	-10	False	GridWorld	MIT	FullObsDiscrete	Individual_Q	0.2	0.01	1000000	6
IndivQLearningVar2/1757_175_7	centralized	True	-10	False	GridWorld	MIT	FullObsDiscrete	Individual_Q	0.2	0.01	1000000	7
IndivQLearningVar2/1758_175_8	centralized	True	-10	False	GridWorld	MIT	FullObsDiscrete	Individual_Q	0.2	0.01	1000000	8
IndivQLearningVar2/1759_175_9	centralized	True	-10	False	GridWorld	MIT	FullObsDiscrete	Individual_Q	0.2	0.01	1000000	9
IndivQLearningVar2/1760_176_0	decentralized	False	0	False	GridWorld	MIT	PartialObsDiscrete	Individual_Q	0.2	0.2	1000000	0
IndivQLearningVar2/1761_176_1	decentralized	False	0	False	GridWorld	MIT	PartialObsDiscrete	Individual_Q	0.2	0.2	1000000	1
IndivQLearningVar2/1762_176_2	decentralized	False	0	False	GridWorld	MIT	PartialObsDiscrete	Individual_Q	0.2	0.2	1000000	2
IndivQLearningVar2/1763_176_3	decentralized	False	0	False	GridWorld	MIT	PartialObsDiscrete	Individual_Q	0.2	0.2	1000000	3
IndivQLearningVar2/1764_176_4	decentralized	False	0	False	GridWorld	MIT	PartialObsDiscrete	Individual_Q	0.2	0.2	1000000	4
IndivQLearningVar2/1765_176_5	decentralized	False	0	False	GridWorld	MIT	PartialObsDiscrete	Individual_Q	0.2	0.2	1000000	5
IndivQLearningVar2/1766_176_6	decentralized	False	0	False	GridWorld	MIT	PartialObsDiscrete	Individual_Q	0.2	0.2	1000000	6
IndivQLearningVar2/1767_176_7	decentralized	False	0	False	GridWorld	MIT	PartialObsDiscrete	Individual_Q	0.2	0.2	1000000	7
IndivQLearningVar2/1768_176_8	decentralized	False	0	False	GridWorld	MIT	PartialObsDiscrete	Individual_Q	0.2	0.2	1000000	8
IndivQLearningVar2/1769_176_9	decentralized	False	0	False	GridWorld	MIT	PartialObsDiscrete	Individual_Q	0.2	0.2	1000000	9
IndivQLearningVar2/1770_177_0	decentralized	True	-10	False	GridWorld	MIT	PartialObsDiscrete	Individual_Q	0.2	0.2	1000000	0
IndivQLearningVar2/1771_177_1	decentralized	True	-10	False	GridWorld	MIT	PartialObsDiscrete	Individual_Q	0.2	0.2	1000000	1
IndivQLearningVar2/1772_177_2	decentralized	True	-10	False	GridWorld	MIT	PartialObsDiscrete	Individual_Q	0.2	0.2	1000000	2
IndivQLearningVar2/1773_177_3	decentralized	True	-10	False	GridWorld	MIT	PartialObsDiscrete	Individual_Q	0.2	0.2	1000000	3
IndivQLearningVar2/1774_177_4	decentralized	True	-10	False	GridWorld	MIT	PartialObsDiscrete	Individual_Q	0.2	0.2	1000000	4
IndivQLearningVar2/1775_177_5	decentralized	True	-10	False	GridWorld	MIT	PartialObsDiscrete	Individual_Q	0.2	0.2	1000000	5
IndivQLearningVar2/1776_177_6	decentralized	True	-10	False	GridWorld	MIT	PartialObsDiscrete	Individual_Q	0.2	0.2	1000000	6
IndivQLearningVar2/1777_177_7	decentralized	True	-10	False	GridWorld	MIT	PartialObsDiscrete	Individual_Q	0.2	0.2	1000000	7
IndivQLearningVar2/1778_177_8	decentralized	True	-10	False	GridWorld	MIT	PartialObsDiscrete	Individual_Q	0.2	0.2	1000000	8
IndivQLearningVar2/1779_177_9	decentralized	True	-10	False	GridWorld	MIT	PartialObsDiscrete	Individual_Q	0.2	0.2	1000000	9
IndivQLearningVar2/1780_178_0	decentralized	False	0	False	GridWorld	MIT	PartialObsDiscrete	Individual_Q	0.2	0.01	1000000	0
IndivQLearningVar2/1781_178_1	decentralized	False	0	False	GridWorld	MIT	PartialObsDiscrete	Individual_Q	0.2	0.01	1000000	1
IndivQLearningVar2/1782_178_2	decentralized	False	0	False	GridWorld	MIT	PartialObsDiscrete	Individual_Q	0.2	0.01	1000000	2
IndivQLearningVar2/1783_178_3	decentralized	False	0	False	GridWorld	MIT	PartialObsDiscrete	Individual_Q	0.2	0.01	1000000	3
IndivQLearningVar2/1784_178_4	decentralized	False	0	False	GridWorld	MIT	PartialObsDiscrete	Individual_Q	0.2	0.01	1000000	4
IndivQLearningVar2/1785_178_5	decentralized	False	0	False	GridWorld	MIT	PartialObsDiscrete	Individual_Q	0.2	0.01	1000000	5
IndivQLearningVar2/1786_178_6	decentralized	False	0	False	GridWorld	MIT	PartialObsDiscrete	Individual_Q	0.2	0.01	1000000	6
IndivQLearningVar2/1787_178_7	decentralized	False	0	False	GridWorld	MIT	PartialObsDiscrete	Individual_Q	0.2	0.01	1000000	7
IndivQLearningVar2/1788_178_8	decentralized	False	0	False	GridWorld	MIT	PartialObsDiscrete	Individual_Q	0.2	0.01	1000000	8
IndivQLearningVar2/1789_178_9	decentralized	False	0	False	GridWorld	MIT	PartialObsDiscrete	Individual_Q	0.2	0.01	1000000	9
IndivQLearningVar2/1790_179_0	decentralized	True	-10	False	GridWorld	MIT	PartialObsDiscrete	Individual_Q	0.2	0.01	1000000	0
IndivQLearningVar2/1791_179_1	decentralized	True	-10	False	GridWorld	MIT	PartialObsDiscrete	Individual_Q	0.2	0.01	1000000	1
IndivQLearningVar2/1792_179_2	decentralized	True	-10	False	GridWorld	MIT	PartialObsDiscrete	Individual_Q	0.2	0.01	1000000	2
IndivQLearningVar2/1793_179_3	decentralized	True	-10	False	GridWorld	MIT	PartialObsDiscrete	Individual_Q	0.2	0.01	1000000	3
IndivQLearningVar2/1794_179_4	decentralized	True	-10	False	GridWorld	MIT	PartialObsDiscrete	Individual_Q	0.2	0.01	1000000	4
IndivQLearningVar2/1795_179_5	decentralized	True	-10	False	GridWorld	MIT	PartialObsDiscrete	Individual_Q	0.2	0.01	1000000	5
IndivQLearningVar2/1796_179_6	decentralized	True	-10	False	GridWorld	MIT	PartialObsDiscrete	Individual_Q	0.2	0.01	1000000	6
IndivQLearningVar2/1797_179_7	decentralized	True	-10	False	GridWorld	MIT	PartialObsDiscrete	Individual_Q	0.2	0.01	1000000	7
IndivQLearningVar2/1798_179_8	decentralized	True	-10	False	GridWorld	MIT	PartialObsDiscrete	Individual_Q	0.2	0.01	1000000	8
IndivQLearningVar2/1799_179_9	decentralized	True	-10	False	GridWorld	MIT	PartialObsDiscrete	Individual_Q	0.2	0.01	1000000	9
IndivQLearningVar2/1800_180_0	decentralized	False	0	False	GridWorld	MIT	FullObsDiscrete	Individual_Q	0.2	0.2	1000000	0
IndivQLearningVar2/1801_180_1	decentralized	False	0	False	GridWorld	MIT	FullObsDiscrete	Individual_Q	0.2	0.2	1000000	1
IndivQLearningVar2/1802_180_2	decentralized	False	0	False	GridWorld	MIT	FullObsDiscrete	Individual_Q	0.2	0.2	1000000	2
IndivQLearningVar2/1803_180_3	decentralized	False	0	False	GridWorld	MIT	FullObsDiscrete	Individual_Q	0.2	0.2	1000000	3
IndivQLearningVar2/1804_180_4	decentralized	False	0	False	GridWorld	MIT	FullObsDiscrete	Individual_Q	0.2	0.2	1000000	4
IndivQLearningVar2/1805_180_5	decentralized	False	0	False	GridWorld	MIT	FullObsDiscrete	Individual_Q	0.2	0.2	1000000	5
IndivQLearningVar2/1806_180_6	decentralized	False	0	False	GridWorld	MIT	FullObsDiscrete	Individual_Q	0.2	0.2	1000000	6
IndivQLearningVar2/1807_180_7	decentralized	False	0	False	GridWorld	MIT	FullObsDiscrete	Individual_Q	0.2	0.2	1000000	7
IndivQLearningVar2/1808_180_8	decentralized	False	0	False	GridWorld	MIT	FullObsDiscrete	Individual_Q	0.2	0.2	1000000	8
IndivQLearningVar2/1809_180_9	decentralized	False	0	False	GridWorld	MIT	FullObsDiscrete	Individual_Q	0.2	0.2	1000000	9
IndivQLearningVar2/1810_181_0	decentralized	True	-10	False	GridWorld	MIT	FullObsDiscrete	Individual_Q	0.2	0.2	1000000	0
IndivQLearningVar2/1811_181_1	decentralized	True	-10	False	GridWorld	MIT	FullObsDiscrete	Individual_Q	0.2	0.2	1000000	1
IndivQLearningVar2/1812_181_2	decentralized	True	-10	False	GridWorld	MIT	FullObsDiscrete	Individual_Q	0.2	0.2	1000000	2
IndivQLearningVar2/1813_181_3	decentralized	True	-10	False	GridWorld	MIT	FullObsDiscrete	Individual_Q	0.2	0.2	1000000	3
IndivQLearningVar2/1814_181_4	decentralized	True	-10	False	GridWorld	MIT	FullObsDiscrete	Individual_Q	0.2	0.2	1000000	4
IndivQLearningVar2/1815_181_5	decentralized	True	-10	False	GridWorld	MIT	FullObsDiscrete	Individual_Q	0.2	0.2	1000000	5
IndivQLearningVar2/1816_181_6	decentralized	True	-10	False	GridWorld	MIT	FullObsDiscrete	Individual_Q	0.2	0.2	1000000	6
IndivQLearningVar2/1817_181_7	decentralized	True	-10	False	GridWorld	MIT	FullObsDiscrete	Individual_Q	0.2	0.2	1000000	7
IndivQLearningVar2/1818_181_8	decentralized	True	-10	False	GridWorld	MIT	FullObsDiscrete	Individual_Q	0.2	0.2	1000000	8
IndivQLearningVar2/1819_181_9	decentralized	True	-10	False	GridWorld	MIT	FullObsDiscrete	Individual_Q	0.2	0.2	1000000	9
IndivQLearningVar2/1820_182_0	decentralized	False	0	False	GridWorld	MIT	FullObsDiscrete	Individual_Q	0.2	0.01	1000000	0
IndivQLearningVar2/1821_182_1	decentralized	False	0	False	GridWorld	MIT	FullObsDiscrete	Individual_Q	0.2	0.01	1000000	1
IndivQLearningVar2/1822_182_2	decentralized	False	0	False	GridWorld	MIT	FullObsDiscrete	Individual_Q	0.2	0.01	1000000	2
IndivQLearningVar2/1823_182_3	decentralized	False	0	False	GridWorld	MIT	FullObsDiscrete	Individual_Q	0.2	0.01	1000000	3
IndivQLearningVar2/1824_182_4	decentralized	False	0	False	GridWorld	MIT	FullObsDiscrete	Individual_Q	0.2	0.01	1000000	4
IndivQLearningVar2/1825_182_5	decentralized	False	0	False	GridWorld	MIT	FullObsDiscrete	Individual_Q	0.2	0.01	1000000	5
IndivQLearningVar2/1826_182_6	decentralized	False	0	False	GridWorld	MIT	FullObsDiscrete	Individual_Q	0.2	0.01	1000000	6
IndivQLearningVar2/1827_182_7	decentralized	False	0	False	GridWorld	MIT	FullObsDiscrete	Individual_Q	0.2	0.01	1000000	7
IndivQLearningVar2/1828_182_8	decentralized	False	0	False	GridWorld	MIT	FullObsDiscrete	Individual_Q	0.2	0.01	1000000	8
IndivQLearningVar2/1829_182_9	decentralized	False	0	False	GridWorld	MIT	FullObsDiscrete	Individual_Q	0.2	0.01	1000000	9
IndivQLearningVar2/1830_183_0	decentralized	True	-10	False	GridWorld	MIT	FullObsDiscrete	Individual_Q	0.2	0.01	1000000	0
IndivQLearningVar2/1831_183_1	decentralized	True	-10	False	GridWorld	MIT	FullObsDiscrete	Individual_Q	0.2	0.01	1000000	1
IndivQLearningVar2/1832_183_2	decentralized	True	-10	False	GridWorld	MIT	FullObsDiscrete	Individual_Q	0.2	0.01	1000000	2
IndivQLearningVar2/1833_183_3	decentralized	True	-10	False	GridWorld	MIT	FullObsDiscrete	Individual_Q	0.2	0.01	1000000	3
IndivQLearningVar2/1834_183_4	decentralized	True	-10	False	GridWorld	MIT	FullObsDiscrete	Individual_Q	0.2	0.01	1000000	4
IndivQLearningVar2/1835_183_5	decentralized	True	-10	False	GridWorld	MIT	FullObsDiscrete	Individual_Q	0.2	0.01	1000000	5
IndivQLearningVar2/1836_183_6	decentralized	True	-10	False	GridWorld	MIT	FullObsDiscrete	Individual_Q	0.2	0.01	1000000	6
IndivQLearningVar2/1837_183_7	decentralized	True	-10	False	GridWorld	MIT	FullObsDiscrete	Individual_Q	0.2	0.01	1000000	7
IndivQLearningVar2/1838_183_8	decentralized	True	-10	False	GridWorld	MIT	FullObsDiscrete	Individual_Q	0.2	0.01	1000000	8
IndivQLearningVar2/1839_183_9	decentralized	True	-10	False	GridWorld	MIT	FullObsDiscrete	Individual_Q	0.2	0.01	1000000	9
IndivQLearningVar2/1840_184_0	none	False	0	False	GridWorld	MIT	PartialObsDiscrete	Individual_Q	0.2	0.2	1000000	0
IndivQLearningVar2/1841_184_1	none	False	0	False	GridWorld	MIT	PartialObsDiscrete	Individual_Q	0.2	0.2	1000000	1
IndivQLearningVar2/1842_184_2	none	False	0	False	GridWorld	MIT	PartialObsDiscrete	Individual_Q	0.2	0.2	1000000	2
IndivQLearningVar2/1843_184_3	none	False	0	False	GridWorld	MIT	PartialObsDiscrete	Individual_Q	0.2	0.2	1000000	3
IndivQLearningVar2/1844_184_4	none	False	0	False	GridWorld	MIT	PartialObsDiscrete	Individual_Q	0.2	0.2	1000000	4
IndivQLearningVar2/1845_184_5	none	False	0	False	GridWorld	MIT	PartialObsDiscrete	Individual_Q	0.2	0.2	1000000	5
IndivQLearningVar2/1846_184_6	none	False	0	False	GridWorld	MIT	PartialObsDiscrete	Individual_Q	0.2	0.2	1000000	6
IndivQLearningVar2/1847_184_7	none	False	0	False	GridWorld	MIT	PartialObsDiscrete	Individual_Q	0.2	0.2	1000000	7
IndivQLearningVar2/1848_184_8	none	False	0	False	GridWorld	MIT	PartialObsDiscrete	Individual_Q	0.2	0.2	1000000	8
IndivQLearningVar2/1849_184_9	none	False	0	False	GridWorld	MIT	PartialObsDiscrete	Individual_Q	0.2	0.2	1000000	9
IndivQLearningVar2/1850_185_0	none	True	-10	False	GridWorld	MIT	PartialObsDiscrete	Individual_Q	0.2	0.2	1000000	0
IndivQLearningVar2/1851_185_1	none	True	-10	False	GridWorld	MIT	PartialObsDiscrete	Individual_Q	0.2	0.2	1000000	1
IndivQLearningVar2/1852_185_2	none	True	-10	False	GridWorld	MIT	PartialObsDiscrete	Individual_Q	0.2	0.2	1000000	2
IndivQLearningVar2/1853_185_3	none	True	-10	False	GridWorld	MIT	PartialObsDiscrete	Individual_Q	0.2	0.2	1000000	3
IndivQLearningVar2/1854_185_4	none	True	-10	False	GridWorld	MIT	PartialObsDiscrete	Individual_Q	0.2	0.2	1000000	4
IndivQLearningVar2/1855_185_5	none	True	-10	False	GridWorld	MIT	PartialObsDiscrete	Individual_Q	0.2	0.2	1000000	5
IndivQLearningVar2/1856_185_6	none	True	-10	False	GridWorld	MIT	PartialObsDiscrete	Individual_Q	0.2	0.2	1000000	6
IndivQLearningVar2/1857_185_7	none	True	-10	False	GridWorld	MIT	PartialObsDiscrete	Individual_Q	0.2	0.2	1000000	7
IndivQLearningVar2/1858_185_8	none	True	-10	False	GridWorld	MIT	PartialObsDiscrete	Individual_Q	0.2	0.2	1000000	8
IndivQLearningVar2/1859_185_9	none	True	-10	False	GridWorld	MIT	PartialObsDiscrete	Individual_Q	0.2	0.2	1000000	9
IndivQLearningVar2/1860_186_0	none	False	0	False	GridWorld	MIT	PartialObsDiscrete	Individual_Q	0.2	0.01	1000000	0
IndivQLearningVar2/1861_186_1	none	False	0	False	GridWorld	MIT	PartialObsDiscrete	Individual_Q	0.2	0.01	1000000	1
IndivQLearningVar2/1862_186_2	none	False	0	False	GridWorld	MIT	PartialObsDiscrete	Individual_Q	0.2	0.01	1000000	2
IndivQLearningVar2/1863_186_3	none	False	0	False	GridWorld	MIT	PartialObsDiscrete	Individual_Q	0.2	0.01	1000000	3
IndivQLearningVar2/1864_186_4	none	False	0	False	GridWorld	MIT	PartialObsDiscrete	Individual_Q	0.2	0.01	1000000	4
IndivQLearningVar2/1865_186_5	none	False	0	False	GridWorld	MIT	PartialObsDiscrete	Individual_Q	0.2	0.01	1000000	5
IndivQLearningVar2/1866_186_6	none	False	0	False	GridWorld	MIT	PartialObsDiscrete	Individual_Q	0.2	0.01	1000000	6
IndivQLearningVar2/1867_186_7	none	False	0	False	GridWorld	MIT	PartialObsDiscrete	Individual_Q	0.2	0.01	1000000	7
IndivQLearningVar2/1868_186_8	none	False	0	False	GridWorld	MIT	PartialObsDiscrete	Individual_Q	0.2	0.01	1000000	8
IndivQLearningVar2/1869_186_9	none	False	0	False	GridWorld	MIT	PartialObsDiscrete	Individual_Q	0.2	0.01	1000000	9
IndivQLearningVar2/1870_187_0	none	True	-10	False	GridWorld	MIT	PartialObsDiscrete	Individual_Q	0.2	0.01	1000000	0
IndivQLearningVar2/1871_187_1	none	True	-10	False	GridWorld	MIT	PartialObsDiscrete	Individual_Q	0.2	0.01	1000000	1
IndivQLearningVar2/1872_187_2	none	True	-10	False	GridWorld	MIT	PartialObsDiscrete	Individual_Q	0.2	0.01	1000000	2
IndivQLearningVar2/1873_187_3	none	True	-10	False	GridWorld	MIT	PartialObsDiscrete	Individual_Q	0.2	0.01	1000000	3
IndivQLearningVar2/1874_187_4	none	True	-10	False	GridWorld	MIT	PartialObsDiscrete	Individual_Q	0.2	0.01	1000000	4
IndivQLearningVar2/1875_187_5	none	True	-10	False	GridWorld	MIT	PartialObsDiscrete	Individual_Q	0.2	0.01	1000000	5
IndivQLearningVar2/1876_187_6	none	True	-10	False	GridWorld	MIT	PartialObsDiscrete	Individual_Q	0.2	0.01	1000000	6
IndivQLearningVar2/1877_187_7	none	True	-10	False	GridWorld	MIT	PartialObsDiscrete	Individual_Q	0.2	0.01	1000000	7
IndivQLearningVar2/1878_187_8	none	True	-10	False	GridWorld	MIT	PartialObsDiscrete	Individual_Q	0.2	0.01	1000000	8
IndivQLearningVar2/1879_187_9	none	True	-10	False	GridWorld	MIT	PartialObsDiscrete	Individual_Q	0.2	0.01	1000000	9
IndivQLearningVar2/1880_188_0	none	False	0	False	GridWorld	MIT	FullObsDiscrete	Individual_Q	0.2	0.2	1000000	0
IndivQLearningVar2/1881_188_1	none	False	0	False	GridWorld	MIT	FullObsDiscrete	Individual_Q	0.2	0.2	1000000	1
IndivQLearningVar2/1882_188_2	none	False	0	False	GridWorld	MIT	FullObsDiscrete	Individual_Q	0.2	0.2	1000000	2
IndivQLearningVar2/1883_188_3	none	False	0	False	GridWorld	MIT	FullObsDiscrete	Individual_Q	0.2	0.2	1000000	3
IndivQLearningVar2/1884_188_4	none	False	0	False	GridWorld	MIT	FullObsDiscrete	Individual_Q	0.2	0.2	1000000	4
IndivQLearningVar2/1885_188_5	none	False	0	False	GridWorld	MIT	FullObsDiscrete	Individual_Q	0.2	0.2	1000000	5
IndivQLearningVar2/1886_188_6	none	False	0	False	GridWorld	MIT	FullObsDiscrete	Individual_Q	0.2	0.2	1000000	6
IndivQLearningVar2/1887_188_7	none	False	0	False	GridWorld	MIT	FullObsDiscrete	Individual_Q	0.2	0.2	1000000	7
IndivQLearningVar2/1888_188_8	none	False	0	False	GridWorld	MIT	FullObsDiscrete	Individual_Q	0.2	0.2	1000000	8
IndivQLearningVar2/1889_188_9	none	False	0	False	GridWorld	MIT	FullObsDiscrete	Individual_Q	0.2	0.2	1000000	9
IndivQLearningVar2/1890_189_0	none	True	-10	False	GridWorld	MIT	FullObsDiscrete	Individual_Q	0.2	0.2	1000000	0
IndivQLearningVar2/1891_189_1	none	True	-10	False	GridWorld	MIT	FullObsDiscrete	Individual_Q	0.2	0.2	1000000	1
IndivQLearningVar2/1892_189_2	none	True	-10	False	GridWorld	MIT	FullObsDiscrete	Individual_Q	0.2	0.2	1000000	2
IndivQLearningVar2/1893_189_3	none	True	-10	False	GridWorld	MIT	FullObsDiscrete	Individual_Q	0.2	0.2	1000000	3
IndivQLearningVar2/1894_189_4	none	True	-10	False	GridWorld	MIT	FullObsDiscrete	Individual_Q	0.2	0.2	1000000	4
IndivQLearningVar2/1895_189_5	none	True	-10	False	GridWorld	MIT	FullObsDiscrete	Individual_Q	0.2	0.2	1000000	5
IndivQLearningVar2/1896_189_6	none	True	-10	False	GridWorld	MIT	FullObsDiscrete	Individual_Q	0.2	0.2	1000000	6
IndivQLearningVar2/1897_189_7	none	True	-10	False	GridWorld	MIT	FullObsDiscrete	Individual_Q	0.2	0.2	1000000	7
IndivQLearningVar2/1898_189_8	none	True	-10	False	GridWorld	MIT	FullObsDiscrete	Individual_Q	0.2	0.2	1000000	8
IndivQLearningVar2/1899_189_9	none	True	-10	False	GridWorld	MIT	FullObsDiscrete	Individual_Q	0.2	0.2	1000000	9
IndivQLearningVar2/1900_190_0	none	False	0	False	GridWorld	MIT	FullObsDiscrete	Individual_Q	0.2	0.01	1000000	0
IndivQLearningVar2/1901_190_1	none	False	0	False	GridWorld	MIT	FullObsDiscrete	Individual_Q	0.2	0.01	1000000	1
IndivQLearningVar2/1902_190_2	none	False	0	False	GridWorld	MIT	FullObsDiscrete	Individual_Q	0.2	0.01	1000000	2
IndivQLearningVar2/1903_190_3	none	False	0	False	GridWorld	MIT	FullObsDiscrete	Individual_Q	0.2	0.01	1000000	3
IndivQLearningVar2/1904_190_4	none	False	0	False	GridWorld	MIT	FullObsDiscrete	Individual_Q	0.2	0.01	1000000	4
IndivQLearningVar2/1905_190_5	none	False	0	False	GridWorld	MIT	FullObsDiscrete	Individual_Q	0.2	0.01	1000000	5
IndivQLearningVar2/1906_190_6	none	False	0	False	GridWorld	MIT	FullObsDiscrete	Individual_Q	0.2	0.01	1000000	6
IndivQLearningVar2/1907_190_7	none	False	0	False	GridWorld	MIT	FullObsDiscrete	Individual_Q	0.2	0.01	1000000	7
IndivQLearningVar2/1908_190_8	none	False	0	False	GridWorld	MIT	FullObsDiscrete	Individual_Q	0.2	0.01	1000000	8
IndivQLearningVar2/1909_190_9	none	False	0	False	GridWorld	MIT	FullObsDiscrete	Individual_Q	0.2	0.01	1000000	9
IndivQLearningVar2/1910_191_0	none	True	-10	False	GridWorld	MIT	FullObsDiscrete	Individual_Q	0.2	0.01	1000000	0
IndivQLearningVar2/1911_191_1	none	True	-10	False	GridWorld	MIT	FullObsDiscrete	Individual_Q	0.2	0.01	1000000	1
IndivQLearningVar2/1912_191_2	none	True	-10	False	GridWorld	MIT	FullObsDiscrete	Individual_Q	0.2	0.01	1000000	2
IndivQLearningVar2/1913_191_3	none	True	-10	False	GridWorld	MIT	FullObsDiscrete	Individual_Q	0.2	0.01	1000000	3
IndivQLearningVar2/1914_191_4	none	True	-10	False	GridWorld	MIT	FullObsDiscrete	Individual_Q	0.2	0.01	1000000	4
IndivQLearningVar2/1915_191_5	none	True	-10	False	GridWorld	MIT	FullObsDiscrete	Individual_Q	0.2	0.01	1000000	5
IndivQLearningVar2/1916_191_6	none	True	-10	False	GridWorld	MIT	FullObsDiscrete	Individual_Q	0.2	0.01	1000000	6
IndivQLearningVar2/1917_191_7	none	True	-10	False	GridWorld	MIT	FullObsDiscrete	Individual_Q	0.2	0.01	1000000	7
IndivQLearningVar2/1918_191_8	none	True	-10	False	GridWorld	MIT	FullObsDiscrete	Individual_Q	0.2	0.01	1000000	8
IndivQLearningVar2/1919_191_9	none	True	-10	False	GridWorld	MIT	FullObsDiscrete	Individual_Q	0.2	0.01	1000000	9
