# Supplementary material
Source: ML conference proceedings conference paper supplement (https://proceedings.neurips.cc/paper_files/paper/2022/hash/57444e14ecd9e2c8f603b4f012ce3811-Abstract.html)
Supplement: Supplementary file 1 [file 57444e14ecd9e2c8f603b4f012ce3811-Supplemental-Conference.zip › 3410_shield_decentralization_for_sa-Supplementary Material/parallel_configs/IndivQLearningVarNearbyObs1.csv]

run_name	shield	punish_unsafe_orig_action	punish_unsafe_orig_action_modifier	randomize_starts	map_type	grid_world_map_name	grid_world_obs_type	learner_type	learner_anneal_eps_start	learner_anneal_eps_finish	max_total_steps	seed
IndivQLearningVarNearbyObs1/0_0_0	centralized	True	0	True	GridWorld	Pentagon	NearbyObsDiscrete	Individual_Q	0.2	0.2	1000000	0
IndivQLearningVarNearbyObs1/1_0_1	centralized	True	0	True	GridWorld	Pentagon	NearbyObsDiscrete	Individual_Q	0.2	0.2	1000000	1
IndivQLearningVarNearbyObs1/2_0_2	centralized	True	0	True	GridWorld	Pentagon	NearbyObsDiscrete	Individual_Q	0.2	0.2	1000000	2
IndivQLearningVarNearbyObs1/3_0_3	centralized	True	0	True	GridWorld	Pentagon	NearbyObsDiscrete	Individual_Q	0.2	0.2	1000000	3
IndivQLearningVarNearbyObs1/4_0_4	centralized	True	0	True	GridWorld	Pentagon	NearbyObsDiscrete	Individual_Q	0.2	0.2	1000000	4
IndivQLearningVarNearbyObs1/5_0_5	centralized	True	0	True	GridWorld	Pentagon	NearbyObsDiscrete	Individual_Q	0.2	0.2	1000000	5
IndivQLearningVarNearbyObs1/6_0_6	centralized	True	0	True	GridWorld	Pentagon	NearbyObsDiscrete	Individual_Q	0.2	0.2	1000000	6
IndivQLearningVarNearbyObs1/7_0_7	centralized	True	0	True	GridWorld	Pentagon	NearbyObsDiscrete	Individual_Q	0.2	0.2	1000000	7
IndivQLearningVarNearbyObs1/8_0_8	centralized	True	0	True	GridWorld	Pentagon	NearbyObsDiscrete	Individual_Q	0.2	0.2	1000000	8
IndivQLearningVarNearbyObs1/9_0_9	centralized	True	0	True	GridWorld	Pentagon	NearbyObsDiscrete	Individual_Q	0.2	0.2	1000000	9
IndivQLearningVarNearbyObs1/10_1_0	centralized	True	-10	True	GridWorld	Pentagon	NearbyObsDiscrete	Individual_Q	0.2	0.2	1000000	0
IndivQLearningVarNearbyObs1/11_1_1	centralized	True	-10	True	GridWorld	Pentagon	NearbyObsDiscrete	Individual_Q	0.2	0.2	1000000	1
IndivQLearningVarNearbyObs1/12_1_2	centralized	True	-10	True	GridWorld	Pentagon	NearbyObsDiscrete	Individual_Q	0.2	0.2	1000000	2
IndivQLearningVarNearbyObs1/13_1_3	centralized	True	-10	True	GridWorld	Pentagon	NearbyObsDiscrete	Individual_Q	0.2	0.2	1000000	3
IndivQLearningVarNearbyObs1/14_1_4	centralized	True	-10	True	GridWorld	Pentagon	NearbyObsDiscrete	Individual_Q	0.2	0.2	1000000	4
IndivQLearningVarNearbyObs1/15_1_5	centralized	True	-10	True	GridWorld	Pentagon	NearbyObsDiscrete	Individual_Q	0.2	0.2	1000000	5
IndivQLearningVarNearbyObs1/16_1_6	centralized	True	-10	True	GridWorld	Pentagon	NearbyObsDiscrete	Individual_Q	0.2	0.2	1000000	6
IndivQLearningVarNearbyObs1/17_1_7	centralized	True	-10	True	GridWorld	Pentagon	NearbyObsDiscrete	Individual_Q	0.2	0.2	1000000	7
IndivQLearningVarNearbyObs1/18_1_8	centralized	True	-10	True	GridWorld	Pentagon	NearbyObsDiscrete	Individual_Q	0.2	0.2	1000000	8
IndivQLearningVarNearbyObs1/19_1_9	centralized	True	-10	True	GridWorld	Pentagon	NearbyObsDiscrete	Individual_Q	0.2	0.2	1000000	9
IndivQLearningVarNearbyObs1/20_2_0	centralized	True	0	True	GridWorld	Pentagon	NearbyObsDiscrete	Individual_Q	0.2	0.01	1000000	0
IndivQLearningVarNearbyObs1/21_2_1	centralized	True	0	True	GridWorld	Pentagon	NearbyObsDiscrete	Individual_Q	0.2	0.01	1000000	1
IndivQLearningVarNearbyObs1/22_2_2	centralized	True	0	True	GridWorld	Pentagon	NearbyObsDiscrete	Individual_Q	0.2	0.01	1000000	2
IndivQLearningVarNearbyObs1/23_2_3	centralized	True	0	True	GridWorld	Pentagon	NearbyObsDiscrete	Individual_Q	0.2	0.01	1000000	3
IndivQLearningVarNearbyObs1/24_2_4	centralized	True	0	True	GridWorld	Pentagon	NearbyObsDiscrete	Individual_Q	0.2	0.01	1000000	4
IndivQLearningVarNearbyObs1/25_2_5	centralized	True	0	True	GridWorld	Pentagon	NearbyObsDiscrete	Individual_Q	0.2	0.01	1000000	5
IndivQLearningVarNearbyObs1/26_2_6	centralized	True	0	True	GridWorld	Pentagon	NearbyObsDiscrete	Individual_Q	0.2	0.01	1000000	6
IndivQLearningVarNearbyObs1/27_2_7	centralized	True	0	True	GridWorld	Pentagon	NearbyObsDiscrete	Individual_Q	0.2	0.01	1000000	7
IndivQLearningVarNearbyObs1/28_2_8	centralized	True	0	True	GridWorld	Pentagon	NearbyObsDiscrete	Individual_Q	0.2	0.01	1000000	8
IndivQLearningVarNearbyObs1/29_2_9	centralized	True	0	True	GridWorld	Pentagon	NearbyObsDiscrete	Individual_Q	0.2	0.01	1000000	9
IndivQLearningVarNearbyObs1/30_3_0	centralized	True	-10	True	GridWorld	Pentagon	NearbyObsDiscrete	Individual_Q	0.2	0.01	1000000	0
IndivQLearningVarNearbyObs1/31_3_1	centralized	True	-10	True	GridWorld	Pentagon	NearbyObsDiscrete	Individual_Q	0.2	0.01	1000000	1
IndivQLearningVarNearbyObs1/32_3_2	centralized	True	-10	True	GridWorld	Pentagon	NearbyObsDiscrete	Individual_Q	0.2	0.01	1000000	2
IndivQLearningVarNearbyObs1/33_3_3	centralized	True	-10	True	GridWorld	Pentagon	NearbyObsDiscrete	Individual_Q	0.2	0.01	1000000	3
IndivQLearningVarNearbyObs1/34_3_4	centralized	True	-10	True	GridWorld	Pentagon	NearbyObsDiscrete	Individual_Q	0.2	0.01	1000000	4
IndivQLearningVarNearbyObs1/35_3_5	centralized	True	-10	True	GridWorld	Pentagon	NearbyObsDiscrete	Individual_Q	0.2	0.01	1000000	5
IndivQLearningVarNearbyObs1/36_3_6	centralized	True	-10	True	GridWorld	Pentagon	NearbyObsDiscrete	Individual_Q	0.2	0.01	1000000	6
IndivQLearningVarNearbyObs1/37_3_7	centralized	True	-10	True	GridWorld	Pentagon	NearbyObsDiscrete	Individual_Q	0.2	0.01	1000000	7
IndivQLearningVarNearbyObs1/38_3_8	centralized	True	-10	True	GridWorld	Pentagon	NearbyObsDiscrete	Individual_Q	0.2	0.01	1000000	8
IndivQLearningVarNearbyObs1/39_3_9	centralized	True	-10	True	GridWorld	Pentagon	NearbyObsDiscrete	Individual_Q	0.2	0.01	1000000	9
IndivQLearningVarNearbyObs1/40_4_0	centralized	True	0	True	GridWorld	Pentagon	FullObsDiscrete	Individual_Q	0.2	0.2	1000000	0
IndivQLearningVarNearbyObs1/41_4_1	centralized	True	0	True	GridWorld	Pentagon	FullObsDiscrete	Individual_Q	0.2	0.2	1000000	1
IndivQLearningVarNearbyObs1/42_4_2	centralized	True	0	True	GridWorld	Pentagon	FullObsDiscrete	Individual_Q	0.2	0.2	1000000	2
IndivQLearningVarNearbyObs1/43_4_3	centralized	True	0	True	GridWorld	Pentagon	FullObsDiscrete	Individual_Q	0.2	0.2	1000000	3
IndivQLearningVarNearbyObs1/44_4_4	centralized	True	0	True	GridWorld	Pentagon	FullObsDiscrete	Individual_Q	0.2	0.2	1000000	4
IndivQLearningVarNearbyObs1/45_4_5	centralized	True	0	True	GridWorld	Pentagon	FullObsDiscrete	Individual_Q	0.2	0.2	1000000	5
IndivQLearningVarNearbyObs1/46_4_6	centralized	True	0	True	GridWorld	Pentagon	FullObsDiscrete	Individual_Q	0.2	0.2	1000000	6
IndivQLearningVarNearbyObs1/47_4_7	centralized	True	0	True	GridWorld	Pentagon	FullObsDiscrete	Individual_Q	0.2	0.2	1000000	7
IndivQLearningVarNearbyObs1/48_4_8	centralized	True	0	True	GridWorld	Pentagon	FullObsDiscrete	Individual_Q	0.2	0.2	1000000	8
IndivQLearningVarNearbyObs1/49_4_9	centralized	True	0	True	GridWorld	Pentagon	FullObsDiscrete	Individual_Q	0.2	0.2	1000000	9
IndivQLearningVarNearbyObs1/50_5_0	centralized	True	-10	True	GridWorld	Pentagon	FullObsDiscrete	Individual_Q	0.2	0.2	1000000	0
IndivQLearningVarNearbyObs1/51_5_1	centralized	True	-10	True	GridWorld	Pentagon	FullObsDiscrete	Individual_Q	0.2	0.2	1000000	1
IndivQLearningVarNearbyObs1/52_5_2	centralized	True	-10	True	GridWorld	Pentagon	FullObsDiscrete	Individual_Q	0.2	0.2	1000000	2
IndivQLearningVarNearbyObs1/53_5_3	centralized	True	-10	True	GridWorld	Pentagon	FullObsDiscrete	Individual_Q	0.2	0.2	1000000	3
IndivQLearningVarNearbyObs1/54_5_4	centralized	True	-10	True	GridWorld	Pentagon	FullObsDiscrete	Individual_Q	0.2	0.2	1000000	4
IndivQLearningVarNearbyObs1/55_5_5	centralized	True	-10	True	GridWorld	Pentagon	FullObsDiscrete	Individual_Q	0.2	0.2	1000000	5
IndivQLearningVarNearbyObs1/56_5_6	centralized	True	-10	True	GridWorld	Pentagon	FullObsDiscrete	Individual_Q	0.2	0.2	1000000	6
IndivQLearningVarNearbyObs1/57_5_7	centralized	True	-10	True	GridWorld	Pentagon	FullObsDiscrete	Individual_Q	0.2	0.2	1000000	7
IndivQLearningVarNearbyObs1/58_5_8	centralized	True	-10	True	GridWorld	Pentagon	FullObsDiscrete	Individual_Q	0.2	0.2	1000000	8
IndivQLearningVarNearbyObs1/59_5_9	centralized	True	-10	True	GridWorld	Pentagon	FullObsDiscrete	Individual_Q	0.2	0.2	1000000	9
IndivQLearningVarNearbyObs1/60_6_0	centralized	True	0	True	GridWorld	Pentagon	FullObsDiscrete	Individual_Q	0.2	0.01	1000000	0
IndivQLearningVarNearbyObs1/61_6_1	centralized	True	0	True	GridWorld	Pentagon	FullObsDiscrete	Individual_Q	0.2	0.01	1000000	1
IndivQLearningVarNearbyObs1/62_6_2	centralized	True	0	True	GridWorld	Pentagon	FullObsDiscrete	Individual_Q	0.2	0.01	1000000	2
IndivQLearningVarNearbyObs1/63_6_3	centralized	True	0	True	GridWorld	Pentagon	FullObsDiscrete	Individual_Q	0.2	0.01	1000000	3
IndivQLearningVarNearbyObs1/64_6_4	centralized	True	0	True	GridWorld	Pentagon	FullObsDiscrete	Individual_Q	0.2	0.01	1000000	4
IndivQLearningVarNearbyObs1/65_6_5	centralized	True	0	True	GridWorld	Pentagon	FullObsDiscrete	Individual_Q	0.2	0.01	1000000	5
IndivQLearningVarNearbyObs1/66_6_6	centralized	True	0	True	GridWorld	Pentagon	FullObsDiscrete	Individual_Q	0.2	0.01	1000000	6
IndivQLearningVarNearbyObs1/67_6_7	centralized	True	0	True	GridWorld	Pentagon	FullObsDiscrete	Individual_Q	0.2	0.01	1000000	7
IndivQLearningVarNearbyObs1/68_6_8	centralized	True	0	True	GridWorld	Pentagon	FullObsDiscrete	Individual_Q	0.2	0.01	1000000	8
IndivQLearningVarNearbyObs1/69_6_9	centralized	True	0	True	GridWorld	Pentagon	FullObsDiscrete	Individual_Q	0.2	0.01	1000000	9
IndivQLearningVarNearbyObs1/70_7_0	centralized	True	-10	True	GridWorld	Pentagon	FullObsDiscrete	Individual_Q	0.2	0.01	1000000	0
IndivQLearningVarNearbyObs1/71_7_1	centralized	True	-10	True	GridWorld	Pentagon	FullObsDiscrete	Individual_Q	0.2	0.01	1000000	1
IndivQLearningVarNearbyObs1/72_7_2	centralized	True	-10	True	GridWorld	Pentagon	FullObsDiscrete	Individual_Q	0.2	0.01	1000000	2
IndivQLearningVarNearbyObs1/73_7_3	centralized	True	-10	True	GridWorld	Pentagon	FullObsDiscrete	Individual_Q	0.2	0.01	1000000	3
IndivQLearningVarNearbyObs1/74_7_4	centralized	True	-10	True	GridWorld	Pentagon	FullObsDiscrete	Individual_Q	0.2	0.01	1000000	4
IndivQLearningVarNearbyObs1/75_7_5	centralized	True	-10	True	GridWorld	Pentagon	FullObsDiscrete	Individual_Q	0.2	0.01	1000000	5
IndivQLearningVarNearbyObs1/76_7_6	centralized	True	-10	True	GridWorld	Pentagon	FullObsDiscrete	Individual_Q	0.2	0.01	1000000	6
IndivQLearningVarNearbyObs1/77_7_7	centralized	True	-10	True	GridWorld	Pentagon	FullObsDiscrete	Individual_Q	0.2	0.01	1000000	7
IndivQLearningVarNearbyObs1/78_7_8	centralized	True	-10	True	GridWorld	Pentagon	FullObsDiscrete	Individual_Q	0.2	0.01	1000000	8
IndivQLearningVarNearbyObs1/79_7_9	centralized	True	-10	True	GridWorld	Pentagon	FullObsDiscrete	Individual_Q	0.2	0.01	1000000	9
IndivQLearningVarNearbyObs1/80_8_0	decentralized	True	0	True	GridWorld	Pentagon	NearbyObsDiscrete	Individual_Q	0.2	0.2	1000000	0
IndivQLearningVarNearbyObs1/81_8_1	decentralized	True	0	True	GridWorld	Pentagon	NearbyObsDiscrete	Individual_Q	0.2	0.2	1000000	1
IndivQLearningVarNearbyObs1/82_8_2	decentralized	True	0	True	GridWorld	Pentagon	NearbyObsDiscrete	Individual_Q	0.2	0.2	1000000	2
IndivQLearningVarNearbyObs1/83_8_3	decentralized	True	0	True	GridWorld	Pentagon	NearbyObsDiscrete	Individual_Q	0.2	0.2	1000000	3
IndivQLearningVarNearbyObs1/84_8_4	decentralized	True	0	True	GridWorld	Pentagon	NearbyObsDiscrete	Individual_Q	0.2	0.2	1000000	4
IndivQLearningVarNearbyObs1/85_8_5	decentralized	True	0	True	GridWorld	Pentagon	NearbyObsDiscrete	Individual_Q	0.2	0.2	1000000	5
IndivQLearningVarNearbyObs1/86_8_6	decentralized	True	0	True	GridWorld	Pentagon	NearbyObsDiscrete	Individual_Q	0.2	0.2	1000000	6
IndivQLearningVarNearbyObs1/87_8_7	decentralized	True	0	True	GridWorld	Pentagon	NearbyObsDiscrete	Individual_Q	0.2	0.2	1000000	7
IndivQLearningVarNearbyObs1/88_8_8	decentralized	True	0	True	GridWorld	Pentagon	NearbyObsDiscrete	Individual_Q	0.2	0.2	1000000	8
IndivQLearningVarNearbyObs1/89_8_9	decentralized	True	0	True	GridWorld	Pentagon	NearbyObsDiscrete	Individual_Q	0.2	0.2	1000000	9
IndivQLearningVarNearbyObs1/90_9_0	decentralized	True	-10	True	GridWorld	Pentagon	NearbyObsDiscrete	Individual_Q	0.2	0.2	1000000	0
IndivQLearningVarNearbyObs1/91_9_1	decentralized	True	-10	True	GridWorld	Pentagon	NearbyObsDiscrete	Individual_Q	0.2	0.2	1000000	1
IndivQLearningVarNearbyObs1/92_9_2	decentralized	True	-10	True	GridWorld	Pentagon	NearbyObsDiscrete	Individual_Q	0.2	0.2	1000000	2
IndivQLearningVarNearbyObs1/93_9_3	decentralized	True	-10	True	GridWorld	Pentagon	NearbyObsDiscrete	Individual_Q	0.2	0.2	1000000	3
IndivQLearningVarNearbyObs1/94_9_4	decentralized	True	-10	True	GridWorld	Pentagon	NearbyObsDiscrete	Individual_Q	0.2	0.2	1000000	4
IndivQLearningVarNearbyObs1/95_9_5	decentralized	True	-10	True	GridWorld	Pentagon	NearbyObsDiscrete	Individual_Q	0.2	0.2	1000000	5
IndivQLearningVarNearbyObs1/96_9_6	decentralized	True	-10	True	GridWorld	Pentagon	NearbyObsDiscrete	Individual_Q	0.2	0.2	1000000	6
IndivQLearningVarNearbyObs1/97_9_7	decentralized	True	-10	True	GridWorld	Pentagon	NearbyObsDiscrete	Individual_Q	0.2	0.2	1000000	7
IndivQLearningVarNearbyObs1/98_9_8	decentralized	True	-10	True	GridWorld	Pentagon	NearbyObsDiscrete	Individual_Q	0.2	0.2	1000000	8
IndivQLearningVarNearbyObs1/99_9_9	decentralized	True	-10	True	GridWorld	Pentagon	NearbyObsDiscrete	Individual_Q	0.2	0.2	1000000	9
IndivQLearningVarNearbyObs1/100_10_0	decentralized	True	0	True	GridWorld	Pentagon	NearbyObsDiscrete	Individual_Q	0.2	0.01	1000000	0
IndivQLearningVarNearbyObs1/101_10_1	decentralized	True	0	True	GridWorld	Pentagon	NearbyObsDiscrete	Individual_Q	0.2	0.01	1000000	1
IndivQLearningVarNearbyObs1/102_10_2	decentralized	True	0	True	GridWorld	Pentagon	NearbyObsDiscrete	Individual_Q	0.2	0.01	1000000	2
IndivQLearningVarNearbyObs1/103_10_3	decentralized	True	0	True	GridWorld	Pentagon	NearbyObsDiscrete	Individual_Q	0.2	0.01	1000000	3
IndivQLearningVarNearbyObs1/104_10_4	decentralized	True	0	True	GridWorld	Pentagon	NearbyObsDiscrete	Individual_Q	0.2	0.01	1000000	4
IndivQLearningVarNearbyObs1/105_10_5	decentralized	True	0	True	GridWorld	Pentagon	NearbyObsDiscrete	Individual_Q	0.2	0.01	1000000	5
IndivQLearningVarNearbyObs1/106_10_6	decentralized	True	0	True	GridWorld	Pentagon	NearbyObsDiscrete	Individual_Q	0.2	0.01	1000000	6
IndivQLearningVarNearbyObs1/107_10_7	decentralized	True	0	True	GridWorld	Pentagon	NearbyObsDiscrete	Individual_Q	0.2	0.01	1000000	7
IndivQLearningVarNearbyObs1/108_10_8	decentralized	True	0	True	GridWorld	Pentagon	NearbyObsDiscrete	Individual_Q	0.2	0.01	1000000	8
IndivQLearningVarNearbyObs1/109_10_9	decentralized	True	0	True	GridWorld	Pentagon	NearbyObsDiscrete	Individual_Q	0.2	0.01	1000000	9
IndivQLearningVarNearbyObs1/110_11_0	decentralized	True	-10	True	GridWorld	Pentagon	NearbyObsDiscrete	Individual_Q	0.2	0.01	1000000	0
IndivQLearningVarNearbyObs1/111_11_1	decentralized	True	-10	True	GridWorld	Pentagon	NearbyObsDiscrete	Individual_Q	0.2	0.01	1000000	1
IndivQLearningVarNearbyObs1/112_11_2	decentralized	True	-10	True	GridWorld	Pentagon	NearbyObsDiscrete	Individual_Q	0.2	0.01	1000000	2
IndivQLearningVarNearbyObs1/113_11_3	decentralized	True	-10	True	GridWorld	Pentagon	NearbyObsDiscrete	Individual_Q	0.2	0.01	1000000	3
IndivQLearningVarNearbyObs1/114_11_4	decentralized	True	-10	True	GridWorld	Pentagon	NearbyObsDiscrete	Individual_Q	0.2	0.01	1000000	4
IndivQLearningVarNearbyObs1/115_11_5	decentralized	True	-10	True	GridWorld	Pentagon	NearbyObsDiscrete	Individual_Q	0.2	0.01	1000000	5
IndivQLearningVarNearbyObs1/116_11_6	decentralized	True	-10	True	GridWorld	Pentagon	NearbyObsDiscrete	Individual_Q	0.2	0.01	1000000	6
IndivQLearningVarNearbyObs1/117_11_7	decentralized	True	-10	True	GridWorld	Pentagon	NearbyObsDiscrete	Individual_Q	0.2	0.01	1000000	7
IndivQLearningVarNearbyObs1/118_11_8	decentralized	True	-10	True	GridWorld	Pentagon	NearbyObsDiscrete	Individual_Q	0.2	0.01	1000000	8
IndivQLearningVarNearbyObs1/119_11_9	decentralized	True	-10	True	GridWorld	Pentagon	NearbyObsDiscrete	Individual_Q	0.2	0.01	1000000	9
IndivQLearningVarNearbyObs1/120_12_0	decentralized	True	0	True	GridWorld	Pentagon	FullObsDiscrete	Individual_Q	0.2	0.2	1000000	0
IndivQLearningVarNearbyObs1/121_12_1	decentralized	True	0	True	GridWorld	Pentagon	FullObsDiscrete	Individual_Q	0.2	0.2	1000000	1
IndivQLearningVarNearbyObs1/122_12_2	decentralized	True	0	True	GridWorld	Pentagon	FullObsDiscrete	Individual_Q	0.2	0.2	1000000	2
IndivQLearningVarNearbyObs1/123_12_3	decentralized	True	0	True	GridWorld	Pentagon	FullObsDiscrete	Individual_Q	0.2	0.2	1000000	3
IndivQLearningVarNearbyObs1/124_12_4	decentralized	True	0	True	GridWorld	Pentagon	FullObsDiscrete	Individual_Q	0.2	0.2	1000000	4
IndivQLearningVarNearbyObs1/125_12_5	decentralized	True	0	True	GridWorld	Pentagon	FullObsDiscrete	Individual_Q	0.2	0.2	1000000	5
IndivQLearningVarNearbyObs1/126_12_6	decentralized	True	0	True	GridWorld	Pentagon	FullObsDiscrete	Individual_Q	0.2	0.2	1000000	6
IndivQLearningVarNearbyObs1/127_12_7	decentralized	True	0	True	GridWorld	Pentagon	FullObsDiscrete	Individual_Q	0.2	0.2	1000000	7
IndivQLearningVarNearbyObs1/128_12_8	decentralized	True	0	True	GridWorld	Pentagon	FullObsDiscrete	Individual_Q	0.2	0.2	1000000	8
IndivQLearningVarNearbyObs1/129_12_9	decentralized	True	0	True	GridWorld	Pentagon	FullObsDiscrete	Individual_Q	0.2	0.2	1000000	9
IndivQLearningVarNearbyObs1/130_13_0	decentralized	True	-10	True	GridWorld	Pentagon	FullObsDiscrete	Individual_Q	0.2	0.2	1000000	0
IndivQLearningVarNearbyObs1/131_13_1	decentralized	True	-10	True	GridWorld	Pentagon	FullObsDiscrete	Individual_Q	0.2	0.2	1000000	1
IndivQLearningVarNearbyObs1/132_13_2	decentralized	True	-10	True	GridWorld	Pentagon	FullObsDiscrete	Individual_Q	0.2	0.2	1000000	2
IndivQLearningVarNearbyObs1/133_13_3	decentralized	True	-10	True	GridWorld	Pentagon	FullObsDiscrete	Individual_Q	0.2	0.2	1000000	3
IndivQLearningVarNearbyObs1/134_13_4	decentralized	True	-10	True	GridWorld	Pentagon	FullObsDiscrete	Individual_Q	0.2	0.2	1000000	4
IndivQLearningVarNearbyObs1/135_13_5	decentralized	True	-10	True	GridWorld	Pentagon	FullObsDiscrete	Individual_Q	0.2	0.2	1000000	5
IndivQLearningVarNearbyObs1/136_13_6	decentralized	True	-10	True	GridWorld	Pentagon	FullObsDiscrete	Individual_Q	0.2	0.2	1000000	6
IndivQLearningVarNearbyObs1/137_13_7	decentralized	True	-10	True	GridWorld	Pentagon	FullObsDiscrete	Individual_Q	0.2	0.2	1000000	7
IndivQLearningVarNearbyObs1/138_13_8	decentralized	True	-10	True	GridWorld	Pentagon	FullObsDiscrete	Individual_Q	0.2	0.2	1000000	8
IndivQLearningVarNearbyObs1/139_13_9	decentralized	True	-10	True	GridWorld	Pentagon	FullObsDiscrete	Individual_Q	0.2	0.2	1000000	9
IndivQLearningVarNearbyObs1/140_14_0	decentralized	True	0	True	GridWorld	Pentagon	FullObsDiscrete	Individual_Q	0.2	0.01	1000000	0
IndivQLearningVarNearbyObs1/141_14_1	decentralized	True	0	True	GridWorld	Pentagon	FullObsDiscrete	Individual_Q	0.2	0.01	1000000	1
IndivQLearningVarNearbyObs1/142_14_2	decentralized	True	0	True	GridWorld	Pentagon	FullObsDiscrete	Individual_Q	0.2	0.01	1000000	2
IndivQLearningVarNearbyObs1/143_14_3	decentralized	True	0	True	GridWorld	Pentagon	FullObsDiscrete	Individual_Q	0.2	0.01	1000000	3
IndivQLearningVarNearbyObs1/144_14_4	decentralized	True	0	True	GridWorld	Pentagon	FullObsDiscrete	Individual_Q	0.2	0.01	1000000	4
IndivQLearningVarNearbyObs1/145_14_5	decentralized	True	0	True	GridWorld	Pentagon	FullObsDiscrete	Individual_Q	0.2	0.01	1000000	5
IndivQLearningVarNearbyObs1/146_14_6	decentralized	True	0	True	GridWorld	Pentagon	FullObsDiscrete	Individual_Q	0.2	0.01	1000000	6
IndivQLearningVarNearbyObs1/147_14_7	decentralized	True	0	True	GridWorld	Pentagon	FullObsDiscrete	Individual_Q	0.2	0.01	1000000	7
IndivQLearningVarNearbyObs1/148_14_8	decentralized	True	0	True	GridWorld	Pentagon	FullObsDiscrete	Individual_Q	0.2	0.01	1000000	8
IndivQLearningVarNearbyObs1/149_14_9	decentralized	True	0	True	GridWorld	Pentagon	FullObsDiscrete	Individual_Q	0.2	0.01	1000000	9
IndivQLearningVarNearbyObs1/150_15_0	decentralized	True	-10	True	GridWorld	Pentagon	FullObsDiscrete	Individual_Q	0.2	0.01	1000000	0
IndivQLearningVarNearbyObs1/151_15_1	decentralized	True	-10	True	GridWorld	Pentagon	FullObsDiscrete	Individual_Q	0.2	0.01	1000000	1
IndivQLearningVarNearbyObs1/152_15_2	decentralized	True	-10	True	GridWorld	Pentagon	FullObsDiscrete	Individual_Q	0.2	0.01	1000000	2
IndivQLearningVarNearbyObs1/153_15_3	decentralized	True	-10	True	GridWorld	Pentagon	FullObsDiscrete	Individual_Q	0.2	0.01	1000000	3
IndivQLearningVarNearbyObs1/154_15_4	decentralized	True	-10	True	GridWorld	Pentagon	FullObsDiscrete	Individual_Q	0.2	0.01	1000000	4
IndivQLearningVarNearbyObs1/155_15_5	decentralized	True	-10	True	GridWorld	Pentagon	FullObsDiscrete	Individual_Q	0.2	0.01	1000000	5
IndivQLearningVarNearbyObs1/156_15_6	decentralized	True	-10	True	GridWorld	Pentagon	FullObsDiscrete	Individual_Q	0.2	0.01	1000000	6
IndivQLearningVarNearbyObs1/157_15_7	decentralized	True	-10	True	GridWorld	Pentagon	FullObsDiscrete	Individual_Q	0.2	0.01	1000000	7
IndivQLearningVarNearbyObs1/158_15_8	decentralized	True	-10	True	GridWorld	Pentagon	FullObsDiscrete	Individual_Q	0.2	0.01	1000000	8
IndivQLearningVarNearbyObs1/159_15_9	decentralized	True	-10	True	GridWorld	Pentagon	FullObsDiscrete	Individual_Q	0.2	0.01	1000000	9
IndivQLearningVarNearbyObs1/160_16_0	none	True	0	True	GridWorld	Pentagon	NearbyObsDiscrete	Individual_Q	0.2	0.2	1000000	0
IndivQLearningVarNearbyObs1/161_16_1	none	True	0	True	GridWorld	Pentagon	NearbyObsDiscrete	Individual_Q	0.2	0.2	1000000	1
IndivQLearningVarNearbyObs1/162_16_2	none	True	0	True	GridWorld	Pentagon	NearbyObsDiscrete	Individual_Q	0.2	0.2	1000000	2
IndivQLearningVarNearbyObs1/163_16_3	none	True	0	True	GridWorld	Pentagon	NearbyObsDiscrete	Individual_Q	0.2	0.2	1000000	3
IndivQLearningVarNearbyObs1/164_16_4	none	True	0	True	GridWorld	Pentagon	NearbyObsDiscrete	Individual_Q	0.2	0.2	1000000	4
IndivQLearningVarNearbyObs1/165_16_5	none	True	0	True	GridWorld	Pentagon	NearbyObsDiscrete	Individual_Q	0.2	0.2	1000000	5
IndivQLearningVarNearbyObs1/166_16_6	none	True	0	True	GridWorld	Pentagon	NearbyObsDiscrete	Individual_Q	0.2	0.2	1000000	6
IndivQLearningVarNearbyObs1/167_16_7	none	True	0	True	GridWorld	Pentagon	NearbyObsDiscrete	Individual_Q	0.2	0.2	1000000	7
IndivQLearningVarNearbyObs1/168_16_8	none	True	0	True	GridWorld	Pentagon	NearbyObsDiscrete	Individual_Q	0.2	0.2	1000000	8
IndivQLearningVarNearbyObs1/169_16_9	none	True	0	True	GridWorld	Pentagon	NearbyObsDiscrete	Individual_Q	0.2	0.2	1000000	9
IndivQLearningVarNearbyObs1/170_17_0	none	True	-10	True	GridWorld	Pentagon	NearbyObsDiscrete	Individual_Q	0.2	0.2	1000000	0
IndivQLearningVarNearbyObs1/171_17_1	none	True	-10	True	GridWorld	Pentagon	NearbyObsDiscrete	Individual_Q	0.2	0.2	1000000	1
IndivQLearningVarNearbyObs1/172_17_2	none	True	-10	True	GridWorld	Pentagon	NearbyObsDiscrete	Individual_Q	0.2	0.2	1000000	2
IndivQLearningVarNearbyObs1/173_17_3	none	True	-10	True	GridWorld	Pentagon	NearbyObsDiscrete	Individual_Q	0.2	0.2	1000000	3
IndivQLearningVarNearbyObs1/174_17_4	none	True	-10	True	GridWorld	Pentagon	NearbyObsDiscrete	Individual_Q	0.2	0.2	1000000	4
IndivQLearningVarNearbyObs1/175_17_5	none	True	-10	True	GridWorld	Pentagon	NearbyObsDiscrete	Individual_Q	0.2	0.2	1000000	5
IndivQLearningVarNearbyObs1/176_17_6	none	True	-10	True	GridWorld	Pentagon	NearbyObsDiscrete	Individual_Q	0.2	0.2	1000000	6
IndivQLearningVarNearbyObs1/177_17_7	none	True	-10	True	GridWorld	Pentagon	NearbyObsDiscrete	Individual_Q	0.2	0.2	1000000	7
IndivQLearningVarNearbyObs1/178_17_8	none	True	-10	True	GridWorld	Pentagon	NearbyObsDiscrete	Individual_Q	0.2	0.2	1000000	8
IndivQLearningVarNearbyObs1/179_17_9	none	True	-10	True	GridWorld	Pentagon	NearbyObsDiscrete	Individual_Q	0.2	0.2	1000000	9
IndivQLearningVarNearbyObs1/180_18_0	none	True	0	True	GridWorld	Pentagon	NearbyObsDiscrete	Individual_Q	0.2	0.01	1000000	0
IndivQLearningVarNearbyObs1/181_18_1	none	True	0	True	GridWorld	Pentagon	NearbyObsDiscrete	Individual_Q	0.2	0.01	1000000	1
IndivQLearningVarNearbyObs1/182_18_2	none	True	0	True	GridWorld	Pentagon	NearbyObsDiscrete	Individual_Q	0.2	0.01	1000000	2
IndivQLearningVarNearbyObs1/183_18_3	none	True	0	True	GridWorld	Pentagon	NearbyObsDiscrete	Individual_Q	0.2	0.01	1000000	3
IndivQLearningVarNearbyObs1/184_18_4	none	True	0	True	GridWorld	Pentagon	NearbyObsDiscrete	Individual_Q	0.2	0.01	1000000	4
IndivQLearningVarNearbyObs1/185_18_5	none	True	0	True	GridWorld	Pentagon	NearbyObsDiscrete	Individual_Q	0.2	0.01	1000000	5
IndivQLearningVarNearbyObs1/186_18_6	none	True	0	True	GridWorld	Pentagon	NearbyObsDiscrete	Individual_Q	0.2	0.01	1000000	6
IndivQLearningVarNearbyObs1/187_18_7	none	True	0	True	GridWorld	Pentagon	NearbyObsDiscrete	Individual_Q	0.2	0.01	1000000	7
IndivQLearningVarNearbyObs1/188_18_8	none	True	0	True	GridWorld	Pentagon	NearbyObsDiscrete	Individual_Q	0.2	0.01	1000000	8
IndivQLearningVarNearbyObs1/189_18_9	none	True	0	True	GridWorld	Pentagon	NearbyObsDiscrete	Individual_Q	0.2	0.01	1000000	9
IndivQLearningVarNearbyObs1/190_19_0	none	True	-10	True	GridWorld	Pentagon	NearbyObsDiscrete	Individual_Q	0.2	0.01	1000000	0
IndivQLearningVarNearbyObs1/191_19_1	none	True	-10	True	GridWorld	Pentagon	NearbyObsDiscrete	Individual_Q	0.2	0.01	1000000	1
IndivQLearningVarNearbyObs1/192_19_2	none	True	-10	True	GridWorld	Pentagon	NearbyObsDiscrete	Individual_Q	0.2	0.01	1000000	2
IndivQLearningVarNearbyObs1/193_19_3	none	True	-10	True	GridWorld	Pentagon	NearbyObsDiscrete	Individual_Q	0.2	0.01	1000000	3
IndivQLearningVarNearbyObs1/194_19_4	none	True	-10	True	GridWorld	Pentagon	NearbyObsDiscrete	Individual_Q	0.2	0.01	1000000	4
IndivQLearningVarNearbyObs1/195_19_5	none	True	-10	True	GridWorld	Pentagon	NearbyObsDiscrete	Individual_Q	0.2	0.01	1000000	5
IndivQLearningVarNearbyObs1/196_19_6	none	True	-10	True	GridWorld	Pentagon	NearbyObsDiscrete	Individual_Q	0.2	0.01	1000000	6
IndivQLearningVarNearbyObs1/197_19_7	none	True	-10	True	GridWorld	Pentagon	NearbyObsDiscrete	Individual_Q	0.2	0.01	1000000	7
IndivQLearningVarNearbyObs1/198_19_8	none	True	-10	True	GridWorld	Pentagon	NearbyObsDiscrete	Individual_Q	0.2	0.01	1000000	8
IndivQLearningVarNearbyObs1/199_19_9	none	True	-10	True	GridWorld	Pentagon	NearbyObsDiscrete	Individual_Q	0.2	0.01	1000000	9
IndivQLearningVarNearbyObs1/200_20_0	none	True	0	True	GridWorld	Pentagon	FullObsDiscrete	Individual_Q	0.2	0.2	1000000	0
IndivQLearningVarNearbyObs1/201_20_1	none	True	0	True	GridWorld	Pentagon	FullObsDiscrete	Individual_Q	0.2	0.2	1000000	1
IndivQLearningVarNearbyObs1/202_20_2	none	True	0	True	GridWorld	Pentagon	FullObsDiscrete	Individual_Q	0.2	0.2	1000000	2
IndivQLearningVarNearbyObs1/203_20_3	none	True	0	True	GridWorld	Pentagon	FullObsDiscrete	Individual_Q	0.2	0.2	1000000	3
IndivQLearningVarNearbyObs1/204_20_4	none	True	0	True	GridWorld	Pentagon	FullObsDiscrete	Individual_Q	0.2	0.2	1000000	4
IndivQLearningVarNearbyObs1/205_20_5	none	True	0	True	GridWorld	Pentagon	FullObsDiscrete	Individual_Q	0.2	0.2	1000000	5
IndivQLearningVarNearbyObs1/206_20_6	none	True	0	True	GridWorld	Pentagon	FullObsDiscrete	Individual_Q	0.2	0.2	1000000	6
IndivQLearningVarNearbyObs1/207_20_7	none	True	0	True	GridWorld	Pentagon	FullObsDiscrete	Individual_Q	0.2	0.2	1000000	7
IndivQLearningVarNearbyObs1/208_20_8	none	True	0	True	GridWorld	Pentagon	FullObsDiscrete	Individual_Q	0.2	0.2	1000000	8
IndivQLearningVarNearbyObs1/209_20_9	none	True	0	True	GridWorld	Pentagon	FullObsDiscrete	Individual_Q	0.2	0.2	1000000	9
IndivQLearningVarNearbyObs1/210_21_0	none	True	-10	True	GridWorld	Pentagon	FullObsDiscrete	Individual_Q	0.2	0.2	1000000	0
IndivQLearningVarNearbyObs1/211_21_1	none	True	-10	True	GridWorld	Pentagon	FullObsDiscrete	Individual_Q	0.2	0.2	1000000	1
IndivQLearningVarNearbyObs1/212_21_2	none	True	-10	True	GridWorld	Pentagon	FullObsDiscrete	Individual_Q	0.2	0.2	1000000	2
IndivQLearningVarNearbyObs1/213_21_3	none	True	-10	True	GridWorld	Pentagon	FullObsDiscrete	Individual_Q	0.2	0.2	1000000	3
IndivQLearningVarNearbyObs1/214_21_4	none	True	-10	True	GridWorld	Pentagon	FullObsDiscrete	Individual_Q	0.2	0.2	1000000	4
IndivQLearningVarNearbyObs1/215_21_5	none	True	-10	True	GridWorld	Pentagon	FullObsDiscrete	Individual_Q	0.2	0.2	1000000	5
IndivQLearningVarNearbyObs1/216_21_6	none	True	-10	True	GridWorld	Pentagon	FullObsDiscrete	Individual_Q	0.2	0.2	1000000	6
IndivQLearningVarNearbyObs1/217_21_7	none	True	-10	True	GridWorld	Pentagon	FullObsDiscrete	Individual_Q	0.2	0.2	1000000	7
IndivQLearningVarNearbyObs1/218_21_8	none	True	-10	True	GridWorld	Pentagon	FullObsDiscrete	Individual_Q	0.2	0.2	1000000	8
IndivQLearningVarNearbyObs1/219_21_9	none	True	-10	True	GridWorld	Pentagon	FullObsDiscrete	Individual_Q	0.2	0.2	1000000	9
IndivQLearningVarNearbyObs1/220_22_0	none	True	0	True	GridWorld	Pentagon	FullObsDiscrete	Individual_Q	0.2	0.01	1000000	0
IndivQLearningVarNearbyObs1/221_22_1	none	True	0	True	GridWorld	Pentagon	FullObsDiscrete	Individual_Q	0.2	0.01	1000000	1
IndivQLearningVarNearbyObs1/222_22_2	none	True	0	True	GridWorld	Pentagon	FullObsDiscrete	Individual_Q	0.2	0.01	1000000	2
IndivQLearningVarNearbyObs1/223_22_3	none	True	0	True	GridWorld	Pentagon	FullObsDiscrete	Individual_Q	0.2	0.01	1000000	3
IndivQLearningVarNearbyObs1/224_22_4	none	True	0	True	GridWorld	Pentagon	FullObsDiscrete	Individual_Q	0.2	0.01	1000000	4
IndivQLearningVarNearbyObs1/225_22_5	none	True	0	True	GridWorld	Pentagon	FullObsDiscrete	Individual_Q	0.2	0.01	1000000	5
IndivQLearningVarNearbyObs1/226_22_6	none	True	0	True	GridWorld	Pentagon	FullObsDiscrete	Individual_Q	0.2	0.01	1000000	6
IndivQLearningVarNearbyObs1/227_22_7	none	True	0	True	GridWorld	Pentagon	FullObsDiscrete	Individual_Q	0.2	0.01	1000000	7
IndivQLearningVarNearbyObs1/228_22_8	none	True	0	True	GridWorld	Pentagon	FullObsDiscrete	Individual_Q	0.2	0.01	1000000	8
IndivQLearningVarNearbyObs1/229_22_9	none	True	0	True	GridWorld	Pentagon	FullObsDiscrete	Individual_Q	0.2	0.01	1000000	9
IndivQLearningVarNearbyObs1/230_23_0	none	True	-10	True	GridWorld	Pentagon	FullObsDiscrete	Individual_Q	0.2	0.01	1000000	0
IndivQLearningVarNearbyObs1/231_23_1	none	True	-10	True	GridWorld	Pentagon	FullObsDiscrete	Individual_Q	0.2	0.01	1000000	1
IndivQLearningVarNearbyObs1/232_23_2	none	True	-10	True	GridWorld	Pentagon	FullObsDiscrete	Individual_Q	0.2	0.01	1000000	2
IndivQLearningVarNearbyObs1/233_23_3	none	True	-10	True	GridWorld	Pentagon	FullObsDiscrete	Individual_Q	0.2	0.01	1000000	3
IndivQLearningVarNearbyObs1/234_23_4	none	True	-10	True	GridWorld	Pentagon	FullObsDiscrete	Individual_Q	0.2	0.01	1000000	4
IndivQLearningVarNearbyObs1/235_23_5	none	True	-10	True	GridWorld	Pentagon	FullObsDiscrete	Individual_Q	0.2	0.01	1000000	5
IndivQLearningVarNearbyObs1/236_23_6	none	True	-10	True	GridWorld	Pentagon	FullObsDiscrete	Individual_Q	0.2	0.01	1000000	6
IndivQLearningVarNearbyObs1/237_23_7	none	True	-10	True	GridWorld	Pentagon	FullObsDiscrete	Individual_Q	0.2	0.01	1000000	7
IndivQLearningVarNearbyObs1/238_23_8	none	True	-10	True	GridWorld	Pentagon	FullObsDiscrete	Individual_Q	0.2	0.01	1000000	8
IndivQLearningVarNearbyObs1/239_23_9	none	True	-10	True	GridWorld	Pentagon	FullObsDiscrete	Individual_Q	0.2	0.01	1000000	9
IndivQLearningVarNearbyObs1/240_24_0	centralized	True	0	False	GridWorld	Pentagon	NearbyObsDiscrete	Individual_Q	0.2	0.2	1000000	0
IndivQLearningVarNearbyObs1/241_24_1	centralized	True	0	False	GridWorld	Pentagon	NearbyObsDiscrete	Individual_Q	0.2	0.2	1000000	1
IndivQLearningVarNearbyObs1/242_24_2	centralized	True	0	False	GridWorld	Pentagon	NearbyObsDiscrete	Individual_Q	0.2	0.2	1000000	2
IndivQLearningVarNearbyObs1/243_24_3	centralized	True	0	False	GridWorld	Pentagon	NearbyObsDiscrete	Individual_Q	0.2	0.2	1000000	3
IndivQLearningVarNearbyObs1/244_24_4	centralized	True	0	False	GridWorld	Pentagon	NearbyObsDiscrete	Individual_Q	0.2	0.2	1000000	4
IndivQLearningVarNearbyObs1/245_24_5	centralized	True	0	False	GridWorld	Pentagon	NearbyObsDiscrete	Individual_Q	0.2	0.2	1000000	5
IndivQLearningVarNearbyObs1/246_24_6	centralized	True	0	False	GridWorld	Pentagon	NearbyObsDiscrete	Individual_Q	0.2	0.2	1000000	6
IndivQLearningVarNearbyObs1/247_24_7	centralized	True	0	False	GridWorld	Pentagon	NearbyObsDiscrete	Individual_Q	0.2	0.2	1000000	7
IndivQLearningVarNearbyObs1/248_24_8	centralized	True	0	False	GridWorld	Pentagon	NearbyObsDiscrete	Individual_Q	0.2	0.2	1000000	8
IndivQLearningVarNearbyObs1/249_24_9	centralized	True	0	False	GridWorld	Pentagon	NearbyObsDiscrete	Individual_Q	0.2	0.2	1000000	9
IndivQLearningVarNearbyObs1/250_25_0	centralized	True	-10	False	GridWorld	Pentagon	NearbyObsDiscrete	Individual_Q	0.2	0.2	1000000	0
IndivQLearningVarNearbyObs1/251_25_1	centralized	True	-10	False	GridWorld	Pentagon	NearbyObsDiscrete	Individual_Q	0.2	0.2	1000000	1
IndivQLearningVarNearbyObs1/252_25_2	centralized	True	-10	False	GridWorld	Pentagon	NearbyObsDiscrete	Individual_Q	0.2	0.2	1000000	2
IndivQLearningVarNearbyObs1/253_25_3	centralized	True	-10	False	GridWorld	Pentagon	NearbyObsDiscrete	Individual_Q	0.2	0.2	1000000	3
IndivQLearningVarNearbyObs1/254_25_4	centralized	True	-10	False	GridWorld	Pentagon	NearbyObsDiscrete	Individual_Q	0.2	0.2	1000000	4
IndivQLearningVarNearbyObs1/255_25_5	centralized	True	-10	False	GridWorld	Pentagon	NearbyObsDiscrete	Individual_Q	0.2	0.2	1000000	5
IndivQLearningVarNearbyObs1/256_25_6	centralized	True	-10	False	GridWorld	Pentagon	NearbyObsDiscrete	Individual_Q	0.2	0.2	1000000	6
IndivQLearningVarNearbyObs1/257_25_7	centralized	True	-10	False	GridWorld	Pentagon	NearbyObsDiscrete	Individual_Q	0.2	0.2	1000000	7
IndivQLearningVarNearbyObs1/258_25_8	centralized	True	-10	False	GridWorld	Pentagon	NearbyObsDiscrete	Individual_Q	0.2	0.2	1000000	8
IndivQLearningVarNearbyObs1/259_25_9	centralized	True	-10	False	GridWorld	Pentagon	NearbyObsDiscrete	Individual_Q	0.2	0.2	1000000	9
IndivQLearningVarNearbyObs1/260_26_0	centralized	True	0	False	GridWorld	Pentagon	NearbyObsDiscrete	Individual_Q	0.2	0.01	1000000	0
IndivQLearningVarNearbyObs1/261_26_1	centralized	True	0	False	GridWorld	Pentagon	NearbyObsDiscrete	Individual_Q	0.2	0.01	1000000	1
IndivQLearningVarNearbyObs1/262_26_2	centralized	True	0	False	GridWorld	Pentagon	NearbyObsDiscrete	Individual_Q	0.2	0.01	1000000	2
IndivQLearningVarNearbyObs1/263_26_3	centralized	True	0	False	GridWorld	Pentagon	NearbyObsDiscrete	Individual_Q	0.2	0.01	1000000	3
IndivQLearningVarNearbyObs1/264_26_4	centralized	True	0	False	GridWorld	Pentagon	NearbyObsDiscrete	Individual_Q	0.2	0.01	1000000	4
IndivQLearningVarNearbyObs1/265_26_5	centralized	True	0	False	GridWorld	Pentagon	NearbyObsDiscrete	Individual_Q	0.2	0.01	1000000	5
IndivQLearningVarNearbyObs1/266_26_6	centralized	True	0	False	GridWorld	Pentagon	NearbyObsDiscrete	Individual_Q	0.2	0.01	1000000	6
IndivQLearningVarNearbyObs1/267_26_7	centralized	True	0	False	GridWorld	Pentagon	NearbyObsDiscrete	Individual_Q	0.2	0.01	1000000	7
IndivQLearningVarNearbyObs1/268_26_8	centralized	True	0	False	GridWorld	Pentagon	NearbyObsDiscrete	Individual_Q	0.2	0.01	1000000	8
IndivQLearningVarNearbyObs1/269_26_9	centralized	True	0	False	GridWorld	Pentagon	NearbyObsDiscrete	Individual_Q	0.2	0.01	1000000	9
IndivQLearningVarNearbyObs1/270_27_0	centralized	True	-10	False	GridWorld	Pentagon	NearbyObsDiscrete	Individual_Q	0.2	0.01	1000000	0
IndivQLearningVarNearbyObs1/271_27_1	centralized	True	-10	False	GridWorld	Pentagon	NearbyObsDiscrete	Individual_Q	0.2	0.01	1000000	1
IndivQLearningVarNearbyObs1/272_27_2	centralized	True	-10	False	GridWorld	Pentagon	NearbyObsDiscrete	Individual_Q	0.2	0.01	1000000	2
IndivQLearningVarNearbyObs1/273_27_3	centralized	True	-10	False	GridWorld	Pentagon	NearbyObsDiscrete	Individual_Q	0.2	0.01	1000000	3
IndivQLearningVarNearbyObs1/274_27_4	centralized	True	-10	False	GridWorld	Pentagon	NearbyObsDiscrete	Individual_Q	0.2	0.01	1000000	4
IndivQLearningVarNearbyObs1/275_27_5	centralized	True	-10	False	GridWorld	Pentagon	NearbyObsDiscrete	Individual_Q	0.2	0.01	1000000	5
IndivQLearningVarNearbyObs1/276_27_6	centralized	True	-10	False	GridWorld	Pentagon	NearbyObsDiscrete	Individual_Q	0.2	0.01	1000000	6
IndivQLearningVarNearbyObs1/277_27_7	centralized	True	-10	False	GridWorld	Pentagon	NearbyObsDiscrete	Individual_Q	0.2	0.01	1000000	7
IndivQLearningVarNearbyObs1/278_27_8	centralized	True	-10	False	GridWorld	Pentagon	NearbyObsDiscrete	Individual_Q	0.2	0.01	1000000	8
IndivQLearningVarNearbyObs1/279_27_9	centralized	True	-10	False	GridWorld	Pentagon	NearbyObsDiscrete	Individual_Q	0.2	0.01	1000000	9
IndivQLearningVarNearbyObs1/280_28_0	centralized	True	0	False	GridWorld	Pentagon	FullObsDiscrete	Individual_Q	0.2	0.2	1000000	0
IndivQLearningVarNearbyObs1/281_28_1	centralized	True	0	False	GridWorld	Pentagon	FullObsDiscrete	Individual_Q	0.2	0.2	1000000	1
IndivQLearningVarNearbyObs1/282_28_2	centralized	True	0	False	GridWorld	Pentagon	FullObsDiscrete	Individual_Q	0.2	0.2	1000000	2
IndivQLearningVarNearbyObs1/283_28_3	centralized	True	0	False	GridWorld	Pentagon	FullObsDiscrete	Individual_Q	0.2	0.2	1000000	3
IndivQLearningVarNearbyObs1/284_28_4	centralized	True	0	False	GridWorld	Pentagon	FullObsDiscrete	Individual_Q	0.2	0.2	1000000	4
IndivQLearningVarNearbyObs1/285_28_5	centralized	True	0	False	GridWorld	Pentagon	FullObsDiscrete	Individual_Q	0.2	0.2	1000000	5
IndivQLearningVarNearbyObs1/286_28_6	centralized	True	0	False	GridWorld	Pentagon	FullObsDiscrete	Individual_Q	0.2	0.2	1000000	6
IndivQLearningVarNearbyObs1/287_28_7	centralized	True	0	False	GridWorld	Pentagon	FullObsDiscrete	Individual_Q	0.2	0.2	1000000	7
IndivQLearningVarNearbyObs1/288_28_8	centralized	True	0	False	GridWorld	Pentagon	FullObsDiscrete	Individual_Q	0.2	0.2	1000000	8
IndivQLearningVarNearbyObs1/289_28_9	centralized	True	0	False	GridWorld	Pentagon	FullObsDiscrete	Individual_Q	0.2	0.2	1000000	9
IndivQLearningVarNearbyObs1/290_29_0	centralized	True	-10	False	GridWorld	Pentagon	FullObsDiscrete	Individual_Q	0.2	0.2	1000000	0
IndivQLearningVarNearbyObs1/291_29_1	centralized	True	-10	False	GridWorld	Pentagon	FullObsDiscrete	Individual_Q	0.2	0.2	1000000	1
IndivQLearningVarNearbyObs1/292_29_2	centralized	True	-10	False	GridWorld	Pentagon	FullObsDiscrete	Individual_Q	0.2	0.2	1000000	2
IndivQLearningVarNearbyObs1/293_29_3	centralized	True	-10	False	GridWorld	Pentagon	FullObsDiscrete	Individual_Q	0.2	0.2	1000000	3
IndivQLearningVarNearbyObs1/294_29_4	centralized	True	-10	False	GridWorld	Pentagon	FullObsDiscrete	Individual_Q	0.2	0.2	1000000	4
IndivQLearningVarNearbyObs1/295_29_5	centralized	True	-10	False	GridWorld	Pentagon	FullObsDiscrete	Individual_Q	0.2	0.2	1000000	5
IndivQLearningVarNearbyObs1/296_29_6	centralized	True	-10	False	GridWorld	Pentagon	FullObsDiscrete	Individual_Q	0.2	0.2	1000000	6
IndivQLearningVarNearbyObs1/297_29_7	centralized	True	-10	False	GridWorld	Pentagon	FullObsDiscrete	Individual_Q	0.2	0.2	1000000	7
IndivQLearningVarNearbyObs1/298_29_8	centralized	True	-10	False	GridWorld	Pentagon	FullObsDiscrete	Individual_Q	0.2	0.2	1000000	8
IndivQLearningVarNearbyObs1/299_29_9	centralized	True	-10	False	GridWorld	Pentagon	FullObsDiscrete	Individual_Q	0.2	0.2	1000000	9
IndivQLearningVarNearbyObs1/300_30_0	centralized	True	0	False	GridWorld	Pentagon	FullObsDiscrete	Individual_Q	0.2	0.01	1000000	0
IndivQLearningVarNearbyObs1/301_30_1	centralized	True	0	False	GridWorld	Pentagon	FullObsDiscrete	Individual_Q	0.2	0.01	1000000	1
IndivQLearningVarNearbyObs1/302_30_2	centralized	True	0	False	GridWorld	Pentagon	FullObsDiscrete	Individual_Q	0.2	0.01	1000000	2
IndivQLearningVarNearbyObs1/303_30_3	centralized	True	0	False	GridWorld	Pentagon	FullObsDiscrete	Individual_Q	0.2	0.01	1000000	3
IndivQLearningVarNearbyObs1/304_30_4	centralized	True	0	False	GridWorld	Pentagon	FullObsDiscrete	Individual_Q	0.2	0.01	1000000	4
IndivQLearningVarNearbyObs1/305_30_5	centralized	True	0	False	GridWorld	Pentagon	FullObsDiscrete	Individual_Q	0.2	0.01	1000000	5
IndivQLearningVarNearbyObs1/306_30_6	centralized	True	0	False	GridWorld	Pentagon	FullObsDiscrete	Individual_Q	0.2	0.01	1000000	6
IndivQLearningVarNearbyObs1/307_30_7	centralized	True	0	False	GridWorld	Pentagon	FullObsDiscrete	Individual_Q	0.2	0.01	1000000	7
IndivQLearningVarNearbyObs1/308_30_8	centralized	True	0	False	GridWorld	Pentagon	FullObsDiscrete	Individual_Q	0.2	0.01	1000000	8
IndivQLearningVarNearbyObs1/309_30_9	centralized	True	0	False	GridWorld	Pentagon	FullObsDiscrete	Individual_Q	0.2	0.01	1000000	9
IndivQLearningVarNearbyObs1/310_31_0	centralized	True	-10	False	GridWorld	Pentagon	FullObsDiscrete	Individual_Q	0.2	0.01	1000000	0
IndivQLearningVarNearbyObs1/311_31_1	centralized	True	-10	False	GridWorld	Pentagon	FullObsDiscrete	Individual_Q	0.2	0.01	1000000	1
IndivQLearningVarNearbyObs1/312_31_2	centralized	True	-10	False	GridWorld	Pentagon	FullObsDiscrete	Individual_Q	0.2	0.01	1000000	2
IndivQLearningVarNearbyObs1/313_31_3	centralized	True	-10	False	GridWorld	Pentagon	FullObsDiscrete	Individual_Q	0.2	0.01	1000000	3
IndivQLearningVarNearbyObs1/314_31_4	centralized	True	-10	False	GridWorld	Pentagon	FullObsDiscrete	Individual_Q	0.2	0.01	1000000	4
IndivQLearningVarNearbyObs1/315_31_5	centralized	True	-10	False	GridWorld	Pentagon	FullObsDiscrete	Individual_Q	0.2	0.01	1000000	5
IndivQLearningVarNearbyObs1/316_31_6	centralized	True	-10	False	GridWorld	Pentagon	FullObsDiscrete	Individual_Q	0.2	0.01	1000000	6
IndivQLearningVarNearbyObs1/317_31_7	centralized	True	-10	False	GridWorld	Pentagon	FullObsDiscrete	Individual_Q	0.2	0.01	1000000	7
IndivQLearningVarNearbyObs1/318_31_8	centralized	True	-10	False	GridWorld	Pentagon	FullObsDiscrete	Individual_Q	0.2	0.01	1000000	8
IndivQLearningVarNearbyObs1/319_31_9	centralized	True	-10	False	GridWorld	Pentagon	FullObsDiscrete	Individual_Q	0.2	0.01	1000000	9
IndivQLearningVarNearbyObs1/320_32_0	decentralized	True	0	False	GridWorld	Pentagon	NearbyObsDiscrete	Individual_Q	0.2	0.2	1000000	0
IndivQLearningVarNearbyObs1/321_32_1	decentralized	True	0	False	GridWorld	Pentagon	NearbyObsDiscrete	Individual_Q	0.2	0.2	1000000	1
IndivQLearningVarNearbyObs1/322_32_2	decentralized	True	0	False	GridWorld	Pentagon	NearbyObsDiscrete	Individual_Q	0.2	0.2	1000000	2
IndivQLearningVarNearbyObs1/323_32_3	decentralized	True	0	False	GridWorld	Pentagon	NearbyObsDiscrete	Individual_Q	0.2	0.2	1000000	3
IndivQLearningVarNearbyObs1/324_32_4	decentralized	True	0	False	GridWorld	Pentagon	NearbyObsDiscrete	Individual_Q	0.2	0.2	1000000	4
IndivQLearningVarNearbyObs1/325_32_5	decentralized	True	0	False	GridWorld	Pentagon	NearbyObsDiscrete	Individual_Q	0.2	0.2	1000000	5
IndivQLearningVarNearbyObs1/326_32_6	decentralized	True	0	False	GridWorld	Pentagon	NearbyObsDiscrete	Individual_Q	0.2	0.2	1000000	6
IndivQLearningVarNearbyObs1/327_32_7	decentralized	True	0	False	GridWorld	Pentagon	NearbyObsDiscrete	Individual_Q	0.2	0.2	1000000	7
IndivQLearningVarNearbyObs1/328_32_8	decentralized	True	0	False	GridWorld	Pentagon	NearbyObsDiscrete	Individual_Q	0.2	0.2	1000000	8
IndivQLearningVarNearbyObs1/329_32_9	decentralized	True	0	False	GridWorld	Pentagon	NearbyObsDiscrete	Individual_Q	0.2	0.2	1000000	9
IndivQLearningVarNearbyObs1/330_33_0	decentralized	True	-10	False	GridWorld	Pentagon	NearbyObsDiscrete	Individual_Q	0.2	0.2	1000000	0
IndivQLearningVarNearbyObs1/331_33_1	decentralized	True	-10	False	GridWorld	Pentagon	NearbyObsDiscrete	Individual_Q	0.2	0.2	1000000	1
IndivQLearningVarNearbyObs1/332_33_2	decentralized	True	-10	False	GridWorld	Pentagon	NearbyObsDiscrete	Individual_Q	0.2	0.2	1000000	2
IndivQLearningVarNearbyObs1/333_33_3	decentralized	True	-10	False	GridWorld	Pentagon	NearbyObsDiscrete	Individual_Q	0.2	0.2	1000000	3
IndivQLearningVarNearbyObs1/334_33_4	decentralized	True	-10	False	GridWorld	Pentagon	NearbyObsDiscrete	Individual_Q	0.2	0.2	1000000	4
IndivQLearningVarNearbyObs1/335_33_5	decentralized	True	-10	False	GridWorld	Pentagon	NearbyObsDiscrete	Individual_Q	0.2	0.2	1000000	5
IndivQLearningVarNearbyObs1/336_33_6	decentralized	True	-10	False	GridWorld	Pentagon	NearbyObsDiscrete	Individual_Q	0.2	0.2	1000000	6
IndivQLearningVarNearbyObs1/337_33_7	decentralized	True	-10	False	GridWorld	Pentagon	NearbyObsDiscrete	Individual_Q	0.2	0.2	1000000	7
IndivQLearningVarNearbyObs1/338_33_8	decentralized	True	-10	False	GridWorld	Pentagon	NearbyObsDiscrete	Individual_Q	0.2	0.2	1000000	8
IndivQLearningVarNearbyObs1/339_33_9	decentralized	True	-10	False	GridWorld	Pentagon	NearbyObsDiscrete	Individual_Q	0.2	0.2	1000000	9
IndivQLearningVarNearbyObs1/340_34_0	decentralized	True	0	False	GridWorld	Pentagon	NearbyObsDiscrete	Individual_Q	0.2	0.01	1000000	0
IndivQLearningVarNearbyObs1/341_34_1	decentralized	True	0	False	GridWorld	Pentagon	NearbyObsDiscrete	Individual_Q	0.2	0.01	1000000	1
IndivQLearningVarNearbyObs1/342_34_2	decentralized	True	0	False	GridWorld	Pentagon	NearbyObsDiscrete	Individual_Q	0.2	0.01	1000000	2
IndivQLearningVarNearbyObs1/343_34_3	decentralized	True	0	False	GridWorld	Pentagon	NearbyObsDiscrete	Individual_Q	0.2	0.01	1000000	3
IndivQLearningVarNearbyObs1/344_34_4	decentralized	True	0	False	GridWorld	Pentagon	NearbyObsDiscrete	Individual_Q	0.2	0.01	1000000	4
IndivQLearningVarNearbyObs1/345_34_5	decentralized	True	0	False	GridWorld	Pentagon	NearbyObsDiscrete	Individual_Q	0.2	0.01	1000000	5
IndivQLearningVarNearbyObs1/346_34_6	decentralized	True	0	False	GridWorld	Pentagon	NearbyObsDiscrete	Individual_Q	0.2	0.01	1000000	6
IndivQLearningVarNearbyObs1/347_34_7	decentralized	True	0	False	GridWorld	Pentagon	NearbyObsDiscrete	Individual_Q	0.2	0.01	1000000	7
IndivQLearningVarNearbyObs1/348_34_8	decentralized	True	0	False	GridWorld	Pentagon	NearbyObsDiscrete	Individual_Q	0.2	0.01	1000000	8
IndivQLearningVarNearbyObs1/349_34_9	decentralized	True	0	False	GridWorld	Pentagon	NearbyObsDiscrete	Individual_Q	0.2	0.01	1000000	9
IndivQLearningVarNearbyObs1/350_35_0	decentralized	True	-10	False	GridWorld	Pentagon	NearbyObsDiscrete	Individual_Q	0.2	0.01	1000000	0
IndivQLearningVarNearbyObs1/351_35_1	decentralized	True	-10	False	GridWorld	Pentagon	NearbyObsDiscrete	Individual_Q	0.2	0.01	1000000	1
IndivQLearningVarNearbyObs1/352_35_2	decentralized	True	-10	False	GridWorld	Pentagon	NearbyObsDiscrete	Individual_Q	0.2	0.01	1000000	2
IndivQLearningVarNearbyObs1/353_35_3	decentralized	True	-10	False	GridWorld	Pentagon	NearbyObsDiscrete	Individual_Q	0.2	0.01	1000000	3
IndivQLearningVarNearbyObs1/354_35_4	decentralized	True	-10	False	GridWorld	Pentagon	NearbyObsDiscrete	Individual_Q	0.2	0.01	1000000	4
IndivQLearningVarNearbyObs1/355_35_5	decentralized	True	-10	False	GridWorld	Pentagon	NearbyObsDiscrete	Individual_Q	0.2	0.01	1000000	5
IndivQLearningVarNearbyObs1/356_35_6	decentralized	True	-10	False	GridWorld	Pentagon	NearbyObsDiscrete	Individual_Q	0.2	0.01	1000000	6
IndivQLearningVarNearbyObs1/357_35_7	decentralized	True	-10	False	GridWorld	Pentagon	NearbyObsDiscrete	Individual_Q	0.2	0.01	1000000	7
IndivQLearningVarNearbyObs1/358_35_8	decentralized	True	-10	False	GridWorld	Pentagon	NearbyObsDiscrete	Individual_Q	0.2	0.01	1000000	8
IndivQLearningVarNearbyObs1/359_35_9	decentralized	True	-10	False	GridWorld	Pentagon	NearbyObsDiscrete	Individual_Q	0.2	0.01	1000000	9
IndivQLearningVarNearbyObs1/360_36_0	decentralized	True	0	False	GridWorld	Pentagon	FullObsDiscrete	Individual_Q	0.2	0.2	1000000	0
IndivQLearningVarNearbyObs1/361_36_1	decentralized	True	0	False	GridWorld	Pentagon	FullObsDiscrete	Individual_Q	0.2	0.2	1000000	1
IndivQLearningVarNearbyObs1/362_36_2	decentralized	True	0	False	GridWorld	Pentagon	FullObsDiscrete	Individual_Q	0.2	0.2	1000000	2
IndivQLearningVarNearbyObs1/363_36_3	decentralized	True	0	False	GridWorld	Pentagon	FullObsDiscrete	Individual_Q	0.2	0.2	1000000	3
IndivQLearningVarNearbyObs1/364_36_4	decentralized	True	0	False	GridWorld	Pentagon	FullObsDiscrete	Individual_Q	0.2	0.2	1000000	4
IndivQLearningVarNearbyObs1/365_36_5	decentralized	True	0	False	GridWorld	Pentagon	FullObsDiscrete	Individual_Q	0.2	0.2	1000000	5
IndivQLearningVarNearbyObs1/366_36_6	decentralized	True	0	False	GridWorld	Pentagon	FullObsDiscrete	Individual_Q	0.2	0.2	1000000	6
IndivQLearningVarNearbyObs1/367_36_7	decentralized	True	0	False	GridWorld	Pentagon	FullObsDiscrete	Individual_Q	0.2	0.2	1000000	7
IndivQLearningVarNearbyObs1/368_36_8	decentralized	True	0	False	GridWorld	Pentagon	FullObsDiscrete	Individual_Q	0.2	0.2	1000000	8
IndivQLearningVarNearbyObs1/369_36_9	decentralized	True	0	False	GridWorld	Pentagon	FullObsDiscrete	Individual_Q	0.2	0.2	1000000	9
IndivQLearningVarNearbyObs1/370_37_0	decentralized	True	-10	False	GridWorld	Pentagon	FullObsDiscrete	Individual_Q	0.2	0.2	1000000	0
IndivQLearningVarNearbyObs1/371_37_1	decentralized	True	-10	False	GridWorld	Pentagon	FullObsDiscrete	Individual_Q	0.2	0.2	1000000	1
IndivQLearningVarNearbyObs1/372_37_2	decentralized	True	-10	False	GridWorld	Pentagon	FullObsDiscrete	Individual_Q	0.2	0.2	1000000	2
IndivQLearningVarNearbyObs1/373_37_3	decentralized	True	-10	False	GridWorld	Pentagon	FullObsDiscrete	Individual_Q	0.2	0.2	1000000	3
IndivQLearningVarNearbyObs1/374_37_4	decentralized	True	-10	False	GridWorld	Pentagon	FullObsDiscrete	Individual_Q	0.2	0.2	1000000	4
IndivQLearningVarNearbyObs1/375_37_5	decentralized	True	-10	False	GridWorld	Pentagon	FullObsDiscrete	Individual_Q	0.2	0.2	1000000	5
IndivQLearningVarNearbyObs1/376_37_6	decentralized	True	-10	False	GridWorld	Pentagon	FullObsDiscrete	Individual_Q	0.2	0.2	1000000	6
IndivQLearningVarNearbyObs1/377_37_7	decentralized	True	-10	False	GridWorld	Pentagon	FullObsDiscrete	Individual_Q	0.2	0.2	1000000	7
IndivQLearningVarNearbyObs1/378_37_8	decentralized	True	-10	False	GridWorld	Pentagon	FullObsDiscrete	Individual_Q	0.2	0.2	1000000	8
IndivQLearningVarNearbyObs1/379_37_9	decentralized	True	-10	False	GridWorld	Pentagon	FullObsDiscrete	Individual_Q	0.2	0.2	1000000	9
IndivQLearningVarNearbyObs1/380_38_0	decentralized	True	0	False	GridWorld	Pentagon	FullObsDiscrete	Individual_Q	0.2	0.01	1000000	0
IndivQLearningVarNearbyObs1/381_38_1	decentralized	True	0	False	GridWorld	Pentagon	FullObsDiscrete	Individual_Q	0.2	0.01	1000000	1
IndivQLearningVarNearbyObs1/382_38_2	decentralized	True	0	False	GridWorld	Pentagon	FullObsDiscrete	Individual_Q	0.2	0.01	1000000	2
IndivQLearningVarNearbyObs1/383_38_3	decentralized	True	0	False	GridWorld	Pentagon	FullObsDiscrete	Individual_Q	0.2	0.01	1000000	3
IndivQLearningVarNearbyObs1/384_38_4	decentralized	True	0	False	GridWorld	Pentagon	FullObsDiscrete	Individual_Q	0.2	0.01	1000000	4
IndivQLearningVarNearbyObs1/385_38_5	decentralized	True	0	False	GridWorld	Pentagon	FullObsDiscrete	Individual_Q	0.2	0.01	1000000	5
IndivQLearningVarNearbyObs1/386_38_6	decentralized	True	0	False	GridWorld	Pentagon	FullObsDiscrete	Individual_Q	0.2	0.01	1000000	6
IndivQLearningVarNearbyObs1/387_38_7	decentralized	True	0	False	GridWorld	Pentagon	FullObsDiscrete	Individual_Q	0.2	0.01	1000000	7
IndivQLearningVarNearbyObs1/388_38_8	decentralized	True	0	False	GridWorld	Pentagon	FullObsDiscrete	Individual_Q	0.2	0.01	1000000	8
IndivQLearningVarNearbyObs1/389_38_9	decentralized	True	0	False	GridWorld	Pentagon	FullObsDiscrete	Individual_Q	0.2	0.01	1000000	9
IndivQLearningVarNearbyObs1/390_39_0	decentralized	True	-10	False	GridWorld	Pentagon	FullObsDiscrete	Individual_Q	0.2	0.01	1000000	0
IndivQLearningVarNearbyObs1/391_39_1	decentralized	True	-10	False	GridWorld	Pentagon	FullObsDiscrete	Individual_Q	0.2	0.01	1000000	1
IndivQLearningVarNearbyObs1/392_39_2	decentralized	True	-10	False	GridWorld	Pentagon	FullObsDiscrete	Individual_Q	0.2	0.01	1000000	2
IndivQLearningVarNearbyObs1/393_39_3	decentralized	True	-10	False	GridWorld	Pentagon	FullObsDiscrete	Individual_Q	0.2	0.01	1000000	3
IndivQLearningVarNearbyObs1/394_39_4	decentralized	True	-10	False	GridWorld	Pentagon	FullObsDiscrete	Individual_Q	0.2	0.01	1000000	4
IndivQLearningVarNearbyObs1/395_39_5	decentralized	True	-10	False	GridWorld	Pentagon	FullObsDiscrete	Individual_Q	0.2	0.01	1000000	5
IndivQLearningVarNearbyObs1/396_39_6	decentralized	True	-10	False	GridWorld	Pentagon	FullObsDiscrete	Individual_Q	0.2	0.01	1000000	6
IndivQLearningVarNearbyObs1/397_39_7	decentralized	True	-10	False	GridWorld	Pentagon	FullObsDiscrete	Individual_Q	0.2	0.01	1000000	7
IndivQLearningVarNearbyObs1/398_39_8	decentralized	True	-10	False	GridWorld	Pentagon	FullObsDiscrete	Individual_Q	0.2	0.01	1000000	8
IndivQLearningVarNearbyObs1/399_39_9	decentralized	True	-10	False	GridWorld	Pentagon	FullObsDiscrete	Individual_Q	0.2	0.01	1000000	9
IndivQLearningVarNearbyObs1/400_40_0	none	True	0	False	GridWorld	Pentagon	NearbyObsDiscrete	Individual_Q	0.2	0.2	1000000	0
IndivQLearningVarNearbyObs1/401_40_1	none	True	0	False	GridWorld	Pentagon	NearbyObsDiscrete	Individual_Q	0.2	0.2	1000000	1
IndivQLearningVarNearbyObs1/402_40_2	none	True	0	False	GridWorld	Pentagon	NearbyObsDiscrete	Individual_Q	0.2	0.2	1000000	2
IndivQLearningVarNearbyObs1/403_40_3	none	True	0	False	GridWorld	Pentagon	NearbyObsDiscrete	Individual_Q	0.2	0.2	1000000	3
IndivQLearningVarNearbyObs1/404_40_4	none	True	0	False	GridWorld	Pentagon	NearbyObsDiscrete	Individual_Q	0.2	0.2	1000000	4
IndivQLearningVarNearbyObs1/405_40_5	none	True	0	False	GridWorld	Pentagon	NearbyObsDiscrete	Individual_Q	0.2	0.2	1000000	5
IndivQLearningVarNearbyObs1/406_40_6	none	True	0	False	GridWorld	Pentagon	NearbyObsDiscrete	Individual_Q	0.2	0.2	1000000	6
IndivQLearningVarNearbyObs1/407_40_7	none	True	0	False	GridWorld	Pentagon	NearbyObsDiscrete	Individual_Q	0.2	0.2	1000000	7
IndivQLearningVarNearbyObs1/408_40_8	none	True	0	False	GridWorld	Pentagon	NearbyObsDiscrete	Individual_Q	0.2	0.2	1000000	8
IndivQLearningVarNearbyObs1/409_40_9	none	True	0	False	GridWorld	Pentagon	NearbyObsDiscrete	Individual_Q	0.2	0.2	1000000	9
IndivQLearningVarNearbyObs1/410_41_0	none	True	-10	False	GridWorld	Pentagon	NearbyObsDiscrete	Individual_Q	0.2	0.2	1000000	0
IndivQLearningVarNearbyObs1/411_41_1	none	True	-10	False	GridWorld	Pentagon	NearbyObsDiscrete	Individual_Q	0.2	0.2	1000000	1
IndivQLearningVarNearbyObs1/412_41_2	none	True	-10	False	GridWorld	Pentagon	NearbyObsDiscrete	Individual_Q	0.2	0.2	1000000	2
IndivQLearningVarNearbyObs1/413_41_3	none	True	-10	False	GridWorld	Pentagon	NearbyObsDiscrete	Individual_Q	0.2	0.2	1000000	3
IndivQLearningVarNearbyObs1/414_41_4	none	True	-10	False	GridWorld	Pentagon	NearbyObsDiscrete	Individual_Q	0.2	0.2	1000000	4
IndivQLearningVarNearbyObs1/415_41_5	none	True	-10	False	GridWorld	Pentagon	NearbyObsDiscrete	Individual_Q	0.2	0.2	1000000	5
IndivQLearningVarNearbyObs1/416_41_6	none	True	-10	False	GridWorld	Pentagon	NearbyObsDiscrete	Individual_Q	0.2	0.2	1000000	6
IndivQLearningVarNearbyObs1/417_41_7	none	True	-10	False	GridWorld	Pentagon	NearbyObsDiscrete	Individual_Q	0.2	0.2	1000000	7
IndivQLearningVarNearbyObs1/418_41_8	none	True	-10	False	GridWorld	Pentagon	NearbyObsDiscrete	Individual_Q	0.2	0.2	1000000	8
IndivQLearningVarNearbyObs1/419_41_9	none	True	-10	False	GridWorld	Pentagon	NearbyObsDiscrete	Individual_Q	0.2	0.2	1000000	9
IndivQLearningVarNearbyObs1/420_42_0	none	True	0	False	GridWorld	Pentagon	NearbyObsDiscrete	Individual_Q	0.2	0.01	1000000	0
IndivQLearningVarNearbyObs1/421_42_1	none	True	0	False	GridWorld	Pentagon	NearbyObsDiscrete	Individual_Q	0.2	0.01	1000000	1
IndivQLearningVarNearbyObs1/422_42_2	none	True	0	False	GridWorld	Pentagon	NearbyObsDiscrete	Individual_Q	0.2	0.01	1000000	2
IndivQLearningVarNearbyObs1/423_42_3	none	True	0	False	GridWorld	Pentagon	NearbyObsDiscrete	Individual_Q	0.2	0.01	1000000	3
IndivQLearningVarNearbyObs1/424_42_4	none	True	0	False	GridWorld	Pentagon	NearbyObsDiscrete	Individual_Q	0.2	0.01	1000000	4
IndivQLearningVarNearbyObs1/425_42_5	none	True	0	False	GridWorld	Pentagon	NearbyObsDiscrete	Individual_Q	0.2	0.01	1000000	5
IndivQLearningVarNearbyObs1/426_42_6	none	True	0	False	GridWorld	Pentagon	NearbyObsDiscrete	Individual_Q	0.2	0.01	1000000	6
IndivQLearningVarNearbyObs1/427_42_7	none	True	0	False	GridWorld	Pentagon	NearbyObsDiscrete	Individual_Q	0.2	0.01	1000000	7
IndivQLearningVarNearbyObs1/428_42_8	none	True	0	False	GridWorld	Pentagon	NearbyObsDiscrete	Individual_Q	0.2	0.01	1000000	8
IndivQLearningVarNearbyObs1/429_42_9	none	True	0	False	GridWorld	Pentagon	NearbyObsDiscrete	Individual_Q	0.2	0.01	1000000	9
IndivQLearningVarNearbyObs1/430_43_0	none	True	-10	False	GridWorld	Pentagon	NearbyObsDiscrete	Individual_Q	0.2	0.01	1000000	0
IndivQLearningVarNearbyObs1/431_43_1	none	True	-10	False	GridWorld	Pentagon	NearbyObsDiscrete	Individual_Q	0.2	0.01	1000000	1
IndivQLearningVarNearbyObs1/432_43_2	none	True	-10	False	GridWorld	Pentagon	NearbyObsDiscrete	Individual_Q	0.2	0.01	1000000	2
IndivQLearningVarNearbyObs1/433_43_3	none	True	-10	False	GridWorld	Pentagon	NearbyObsDiscrete	Individual_Q	0.2	0.01	1000000	3
IndivQLearningVarNearbyObs1/434_43_4	none	True	-10	False	GridWorld	Pentagon	NearbyObsDiscrete	Individual_Q	0.2	0.01	1000000	4
IndivQLearningVarNearbyObs1/435_43_5	none	True	-10	False	GridWorld	Pentagon	NearbyObsDiscrete	Individual_Q	0.2	0.01	1000000	5
IndivQLearningVarNearbyObs1/436_43_6	none	True	-10	False	GridWorld	Pentagon	NearbyObsDiscrete	Individual_Q	0.2	0.01	1000000	6
IndivQLearningVarNearbyObs1/437_43_7	none	True	-10	False	GridWorld	Pentagon	NearbyObsDiscrete	Individual_Q	0.2	0.01	1000000	7
IndivQLearningVarNearbyObs1/438_43_8	none	True	-10	False	GridWorld	Pentagon	NearbyObsDiscrete	Individual_Q	0.2	0.01	1000000	8
IndivQLearningVarNearbyObs1/439_43_9	none	True	-10	False	GridWorld	Pentagon	NearbyObsDiscrete	Individual_Q	0.2	0.01	1000000	9
IndivQLearningVarNearbyObs1/440_44_0	none	True	0	False	GridWorld	Pentagon	FullObsDiscrete	Individual_Q	0.2	0.2	1000000	0
IndivQLearningVarNearbyObs1/441_44_1	none	True	0	False	GridWorld	Pentagon	FullObsDiscrete	Individual_Q	0.2	0.2	1000000	1
IndivQLearningVarNearbyObs1/442_44_2	none	True	0	False	GridWorld	Pentagon	FullObsDiscrete	Individual_Q	0.2	0.2	1000000	2
IndivQLearningVarNearbyObs1/443_44_3	none	True	0	False	GridWorld	Pentagon	FullObsDiscrete	Individual_Q	0.2	0.2	1000000	3
IndivQLearningVarNearbyObs1/444_44_4	none	True	0	False	GridWorld	Pentagon	FullObsDiscrete	Individual_Q	0.2	0.2	1000000	4
IndivQLearningVarNearbyObs1/445_44_5	none	True	0	False	GridWorld	Pentagon	FullObsDiscrete	Individual_Q	0.2	0.2	1000000	5
IndivQLearningVarNearbyObs1/446_44_6	none	True	0	False	GridWorld	Pentagon	FullObsDiscrete	Individual_Q	0.2	0.2	1000000	6
IndivQLearningVarNearbyObs1/447_44_7	none	True	0	False	GridWorld	Pentagon	FullObsDiscrete	Individual_Q	0.2	0.2	1000000	7
IndivQLearningVarNearbyObs1/448_44_8	none	True	0	False	GridWorld	Pentagon	FullObsDiscrete	Individual_Q	0.2	0.2	1000000	8
IndivQLearningVarNearbyObs1/449_44_9	none	True	0	False	GridWorld	Pentagon	FullObsDiscrete	Individual_Q	0.2	0.2	1000000	9
IndivQLearningVarNearbyObs1/450_45_0	none	True	-10	False	GridWorld	Pentagon	FullObsDiscrete	Individual_Q	0.2	0.2	1000000	0
IndivQLearningVarNearbyObs1/451_45_1	none	True	-10	False	GridWorld	Pentagon	FullObsDiscrete	Individual_Q	0.2	0.2	1000000	1
IndivQLearningVarNearbyObs1/452_45_2	none	True	-10	False	GridWorld	Pentagon	FullObsDiscrete	Individual_Q	0.2	0.2	1000000	2
IndivQLearningVarNearbyObs1/453_45_3	none	True	-10	False	GridWorld	Pentagon	FullObsDiscrete	Individual_Q	0.2	0.2	1000000	3
IndivQLearningVarNearbyObs1/454_45_4	none	True	-10	False	GridWorld	Pentagon	FullObsDiscrete	Individual_Q	0.2	0.2	1000000	4
IndivQLearningVarNearbyObs1/455_45_5	none	True	-10	False	GridWorld	Pentagon	FullObsDiscrete	Individual_Q	0.2	0.2	1000000	5
IndivQLearningVarNearbyObs1/456_45_6	none	True	-10	False	GridWorld	Pentagon	FullObsDiscrete	Individual_Q	0.2	0.2	1000000	6
IndivQLearningVarNearbyObs1/457_45_7	none	True	-10	False	GridWorld	Pentagon	FullObsDiscrete	Individual_Q	0.2	0.2	1000000	7
IndivQLearningVarNearbyObs1/458_45_8	none	True	-10	False	GridWorld	Pentagon	FullObsDiscrete	Individual_Q	0.2	0.2	1000000	8
IndivQLearningVarNearbyObs1/459_45_9	none	True	-10	False	GridWorld	Pentagon	FullObsDiscrete	Individual_Q	0.2	0.2	1000000	9
IndivQLearningVarNearbyObs1/460_46_0	none	True	0	False	GridWorld	Pentagon	FullObsDiscrete	Individual_Q	0.2	0.01	1000000	0
IndivQLearningVarNearbyObs1/461_46_1	none	True	0	False	GridWorld	Pentagon	FullObsDiscrete	Individual_Q	0.2	0.01	1000000	1
IndivQLearningVarNearbyObs1/462_46_2	none	True	0	False	GridWorld	Pentagon	FullObsDiscrete	Individual_Q	0.2	0.01	1000000	2
IndivQLearningVarNearbyObs1/463_46_3	none	True	0	False	GridWorld	Pentagon	FullObsDiscrete	Individual_Q	0.2	0.01	1000000	3
IndivQLearningVarNearbyObs1/464_46_4	none	True	0	False	GridWorld	Pentagon	FullObsDiscrete	Individual_Q	0.2	0.01	1000000	4
IndivQLearningVarNearbyObs1/465_46_5	none	True	0	False	GridWorld	Pentagon	FullObsDiscrete	Individual_Q	0.2	0.01	1000000	5
IndivQLearningVarNearbyObs1/466_46_6	none	True	0	False	GridWorld	Pentagon	FullObsDiscrete	Individual_Q	0.2	0.01	1000000	6
IndivQLearningVarNearbyObs1/467_46_7	none	True	0	False	GridWorld	Pentagon	FullObsDiscrete	Individual_Q	0.2	0.01	1000000	7
IndivQLearningVarNearbyObs1/468_46_8	none	True	0	False	GridWorld	Pentagon	FullObsDiscrete	Individual_Q	0.2	0.01	1000000	8
IndivQLearningVarNearbyObs1/469_46_9	none	True	0	False	GridWorld	Pentagon	FullObsDiscrete	Individual_Q	0.2	0.01	1000000	9
IndivQLearningVarNearbyObs1/470_47_0	none	True	-10	False	GridWorld	Pentagon	FullObsDiscrete	Individual_Q	0.2	0.01	1000000	0
IndivQLearningVarNearbyObs1/471_47_1	none	True	-10	False	GridWorld	Pentagon	FullObsDiscrete	Individual_Q	0.2	0.01	1000000	1
IndivQLearningVarNearbyObs1/472_47_2	none	True	-10	False	GridWorld	Pentagon	FullObsDiscrete	Individual_Q	0.2	0.01	1000000	2
IndivQLearningVarNearbyObs1/473_47_3	none	True	-10	False	GridWorld	Pentagon	FullObsDiscrete	Individual_Q	0.2	0.01	1000000	3
IndivQLearningVarNearbyObs1/474_47_4	none	True	-10	False	GridWorld	Pentagon	FullObsDiscrete	Individual_Q	0.2	0.01	1000000	4
IndivQLearningVarNearbyObs1/475_47_5	none	True	-10	False	GridWorld	Pentagon	FullObsDiscrete	Individual_Q	0.2	0.01	1000000	5
IndivQLearningVarNearbyObs1/476_47_6	none	True	-10	False	GridWorld	Pentagon	FullObsDiscrete	Individual_Q	0.2	0.01	1000000	6
IndivQLearningVarNearbyObs1/477_47_7	none	True	-10	False	GridWorld	Pentagon	FullObsDiscrete	Individual_Q	0.2	0.01	1000000	7
IndivQLearningVarNearbyObs1/478_47_8	none	True	-10	False	GridWorld	Pentagon	FullObsDiscrete	Individual_Q	0.2	0.01	1000000	8
IndivQLearningVarNearbyObs1/479_47_9	none	True	-10	False	GridWorld	Pentagon	FullObsDiscrete	Individual_Q	0.2	0.01	1000000	9
IndivQLearningVarNearbyObs1/480_48_0	centralized	True	0	True	GridWorld	ISR	NearbyObsDiscrete	Individual_Q	0.2	0.2	1000000	0
IndivQLearningVarNearbyObs1/481_48_1	centralized	True	0	True	GridWorld	ISR	NearbyObsDiscrete	Individual_Q	0.2	0.2	1000000	1
IndivQLearningVarNearbyObs1/482_48_2	centralized	True	0	True	GridWorld	ISR	NearbyObsDiscrete	Individual_Q	0.2	0.2	1000000	2
IndivQLearningVarNearbyObs1/483_48_3	centralized	True	0	True	GridWorld	ISR	NearbyObsDiscrete	Individual_Q	0.2	0.2	1000000	3
IndivQLearningVarNearbyObs1/484_48_4	centralized	True	0	True	GridWorld	ISR	NearbyObsDiscrete	Individual_Q	0.2	0.2	1000000	4
IndivQLearningVarNearbyObs1/485_48_5	centralized	True	0	True	GridWorld	ISR	NearbyObsDiscrete	Individual_Q	0.2	0.2	1000000	5
IndivQLearningVarNearbyObs1/486_48_6	centralized	True	0	True	GridWorld	ISR	NearbyObsDiscrete	Individual_Q	0.2	0.2	1000000	6
IndivQLearningVarNearbyObs1/487_48_7	centralized	True	0	True	GridWorld	ISR	NearbyObsDiscrete	Individual_Q	0.2	0.2	1000000	7
IndivQLearningVarNearbyObs1/488_48_8	centralized	True	0	True	GridWorld	ISR	NearbyObsDiscrete	Individual_Q	0.2	0.2	1000000	8
IndivQLearningVarNearbyObs1/489_48_9	centralized	True	0	True	GridWorld	ISR	NearbyObsDiscrete	Individual_Q	0.2	0.2	1000000	9
IndivQLearningVarNearbyObs1/490_49_0	centralized	True	-10	True	GridWorld	ISR	NearbyObsDiscrete	Individual_Q	0.2	0.2	1000000	0
IndivQLearningVarNearbyObs1/491_49_1	centralized	True	-10	True	GridWorld	ISR	NearbyObsDiscrete	Individual_Q	0.2	0.2	1000000	1
IndivQLearningVarNearbyObs1/492_49_2	centralized	True	-10	True	GridWorld	ISR	NearbyObsDiscrete	Individual_Q	0.2	0.2	1000000	2
IndivQLearningVarNearbyObs1/493_49_3	centralized	True	-10	True	GridWorld	ISR	NearbyObsDiscrete	Individual_Q	0.2	0.2	1000000	3
IndivQLearningVarNearbyObs1/494_49_4	centralized	True	-10	True	GridWorld	ISR	NearbyObsDiscrete	Individual_Q	0.2	0.2	1000000	4
IndivQLearningVarNearbyObs1/495_49_5	centralized	True	-10	True	GridWorld	ISR	NearbyObsDiscrete	Individual_Q	0.2	0.2	1000000	5
IndivQLearningVarNearbyObs1/496_49_6	centralized	True	-10	True	GridWorld	ISR	NearbyObsDiscrete	Individual_Q	0.2	0.2	1000000	6
IndivQLearningVarNearbyObs1/497_49_7	centralized	True	-10	True	GridWorld	ISR	NearbyObsDiscrete	Individual_Q	0.2	0.2	1000000	7
IndivQLearningVarNearbyObs1/498_49_8	centralized	True	-10	True	GridWorld	ISR	NearbyObsDiscrete	Individual_Q	0.2	0.2	1000000	8
IndivQLearningVarNearbyObs1/499_49_9	centralized	True	-10	True	GridWorld	ISR	NearbyObsDiscrete	Individual_Q	0.2	0.2	1000000	9
IndivQLearningVarNearbyObs1/500_50_0	centralized	True	0	True	GridWorld	ISR	NearbyObsDiscrete	Individual_Q	0.2	0.01	1000000	0
IndivQLearningVarNearbyObs1/501_50_1	centralized	True	0	True	GridWorld	ISR	NearbyObsDiscrete	Individual_Q	0.2	0.01	1000000	1
IndivQLearningVarNearbyObs1/502_50_2	centralized	True	0	True	GridWorld	ISR	NearbyObsDiscrete	Individual_Q	0.2	0.01	1000000	2
IndivQLearningVarNearbyObs1/503_50_3	centralized	True	0	True	GridWorld	ISR	NearbyObsDiscrete	Individual_Q	0.2	0.01	1000000	3
IndivQLearningVarNearbyObs1/504_50_4	centralized	True	0	True	GridWorld	ISR	NearbyObsDiscrete	Individual_Q	0.2	0.01	1000000	4
IndivQLearningVarNearbyObs1/505_50_5	centralized	True	0	True	GridWorld	ISR	NearbyObsDiscrete	Individual_Q	0.2	0.01	1000000	5
IndivQLearningVarNearbyObs1/506_50_6	centralized	True	0	True	GridWorld	ISR	NearbyObsDiscrete	Individual_Q	0.2	0.01	1000000	6
IndivQLearningVarNearbyObs1/507_50_7	centralized	True	0	True	GridWorld	ISR	NearbyObsDiscrete	Individual_Q	0.2	0.01	1000000	7
IndivQLearningVarNearbyObs1/508_50_8	centralized	True	0	True	GridWorld	ISR	NearbyObsDiscrete	Individual_Q	0.2	0.01	1000000	8
IndivQLearningVarNearbyObs1/509_50_9	centralized	True	0	True	GridWorld	ISR	NearbyObsDiscrete	Individual_Q	0.2	0.01	1000000	9
IndivQLearningVarNearbyObs1/510_51_0	centralized	True	-10	True	GridWorld	ISR	NearbyObsDiscrete	Individual_Q	0.2	0.01	1000000	0
IndivQLearningVarNearbyObs1/511_51_1	centralized	True	-10	True	GridWorld	ISR	NearbyObsDiscrete	Individual_Q	0.2	0.01	1000000	1
IndivQLearningVarNearbyObs1/512_51_2	centralized	True	-10	True	GridWorld	ISR	NearbyObsDiscrete	Individual_Q	0.2	0.01	1000000	2
IndivQLearningVarNearbyObs1/513_51_3	centralized	True	-10	True	GridWorld	ISR	NearbyObsDiscrete	Individual_Q	0.2	0.01	1000000	3
IndivQLearningVarNearbyObs1/514_51_4	centralized	True	-10	True	GridWorld	ISR	NearbyObsDiscrete	Individual_Q	0.2	0.01	1000000	4
IndivQLearningVarNearbyObs1/515_51_5	centralized	True	-10	True	GridWorld	ISR	NearbyObsDiscrete	Individual_Q	0.2	0.01	1000000	5
IndivQLearningVarNearbyObs1/516_51_6	centralized	True	-10	True	GridWorld	ISR	NearbyObsDiscrete	Individual_Q	0.2	0.01	1000000	6
IndivQLearningVarNearbyObs1/517_51_7	centralized	True	-10	True	GridWorld	ISR	NearbyObsDiscrete	Individual_Q	0.2	0.01	1000000	7
IndivQLearningVarNearbyObs1/518_51_8	centralized	True	-10	True	GridWorld	ISR	NearbyObsDiscrete	Individual_Q	0.2	0.01	1000000	8
IndivQLearningVarNearbyObs1/519_51_9	centralized	True	-10	True	GridWorld	ISR	NearbyObsDiscrete	Individual_Q	0.2	0.01	1000000	9
IndivQLearningVarNearbyObs1/520_52_0	centralized	True	0	True	GridWorld	ISR	FullObsDiscrete	Individual_Q	0.2	0.2	1000000	0
IndivQLearningVarNearbyObs1/521_52_1	centralized	True	0	True	GridWorld	ISR	FullObsDiscrete	Individual_Q	0.2	0.2	1000000	1
IndivQLearningVarNearbyObs1/522_52_2	centralized	True	0	True	GridWorld	ISR	FullObsDiscrete	Individual_Q	0.2	0.2	1000000	2
IndivQLearningVarNearbyObs1/523_52_3	centralized	True	0	True	GridWorld	ISR	FullObsDiscrete	Individual_Q	0.2	0.2	1000000	3
IndivQLearningVarNearbyObs1/524_52_4	centralized	True	0	True	GridWorld	ISR	FullObsDiscrete	Individual_Q	0.2	0.2	1000000	4
IndivQLearningVarNearbyObs1/525_52_5	centralized	True	0	True	GridWorld	ISR	FullObsDiscrete	Individual_Q	0.2	0.2	1000000	5
IndivQLearningVarNearbyObs1/526_52_6	centralized	True	0	True	GridWorld	ISR	FullObsDiscrete	Individual_Q	0.2	0.2	1000000	6
IndivQLearningVarNearbyObs1/527_52_7	centralized	True	0	True	GridWorld	ISR	FullObsDiscrete	Individual_Q	0.2	0.2	1000000	7
IndivQLearningVarNearbyObs1/528_52_8	centralized	True	0	True	GridWorld	ISR	FullObsDiscrete	Individual_Q	0.2	0.2	1000000	8
IndivQLearningVarNearbyObs1/529_52_9	centralized	True	0	True	GridWorld	ISR	FullObsDiscrete	Individual_Q	0.2	0.2	1000000	9
IndivQLearningVarNearbyObs1/530_53_0	centralized	True	-10	True	GridWorld	ISR	FullObsDiscrete	Individual_Q	0.2	0.2	1000000	0
IndivQLearningVarNearbyObs1/531_53_1	centralized	True	-10	True	GridWorld	ISR	FullObsDiscrete	Individual_Q	0.2	0.2	1000000	1
IndivQLearningVarNearbyObs1/532_53_2	centralized	True	-10	True	GridWorld	ISR	FullObsDiscrete	Individual_Q	0.2	0.2	1000000	2
IndivQLearningVarNearbyObs1/533_53_3	centralized	True	-10	True	GridWorld	ISR	FullObsDiscrete	Individual_Q	0.2	0.2	1000000	3
IndivQLearningVarNearbyObs1/534_53_4	centralized	True	-10	True	GridWorld	ISR	FullObsDiscrete	Individual_Q	0.2	0.2	1000000	4
IndivQLearningVarNearbyObs1/535_53_5	centralized	True	-10	True	GridWorld	ISR	FullObsDiscrete	Individual_Q	0.2	0.2	1000000	5
IndivQLearningVarNearbyObs1/536_53_6	centralized	True	-10	True	GridWorld	ISR	FullObsDiscrete	Individual_Q	0.2	0.2	1000000	6
IndivQLearningVarNearbyObs1/537_53_7	centralized	True	-10	True	GridWorld	ISR	FullObsDiscrete	Individual_Q	0.2	0.2	1000000	7
IndivQLearningVarNearbyObs1/538_53_8	centralized	True	-10	True	GridWorld	ISR	FullObsDiscrete	Individual_Q	0.2	0.2	1000000	8
IndivQLearningVarNearbyObs1/539_53_9	centralized	True	-10	True	GridWorld	ISR	FullObsDiscrete	Individual_Q	0.2	0.2	1000000	9
IndivQLearningVarNearbyObs1/540_54_0	centralized	True	0	True	GridWorld	ISR	FullObsDiscrete	Individual_Q	0.2	0.01	1000000	0
IndivQLearningVarNearbyObs1/541_54_1	centralized	True	0	True	GridWorld	ISR	FullObsDiscrete	Individual_Q	0.2	0.01	1000000	1
IndivQLearningVarNearbyObs1/542_54_2	centralized	True	0	True	GridWorld	ISR	FullObsDiscrete	Individual_Q	0.2	0.01	1000000	2
IndivQLearningVarNearbyObs1/543_54_3	centralized	True	0	True	GridWorld	ISR	FullObsDiscrete	Individual_Q	0.2	0.01	1000000	3
IndivQLearningVarNearbyObs1/544_54_4	centralized	True	0	True	GridWorld	ISR	FullObsDiscrete	Individual_Q	0.2	0.01	1000000	4
IndivQLearningVarNearbyObs1/545_54_5	centralized	True	0	True	GridWorld	ISR	FullObsDiscrete	Individual_Q	0.2	0.01	1000000	5
IndivQLearningVarNearbyObs1/546_54_6	centralized	True	0	True	GridWorld	ISR	FullObsDiscrete	Individual_Q	0.2	0.01	1000000	6
IndivQLearningVarNearbyObs1/547_54_7	centralized	True	0	True	GridWorld	ISR	FullObsDiscrete	Individual_Q	0.2	0.01	1000000	7
IndivQLearningVarNearbyObs1/548_54_8	centralized	True	0	True	GridWorld	ISR	FullObsDiscrete	Individual_Q	0.2	0.01	1000000	8
IndivQLearningVarNearbyObs1/549_54_9	centralized	True	0	True	GridWorld	ISR	FullObsDiscrete	Individual_Q	0.2	0.01	1000000	9
IndivQLearningVarNearbyObs1/550_55_0	centralized	True	-10	True	GridWorld	ISR	FullObsDiscrete	Individual_Q	0.2	0.01	1000000	0
IndivQLearningVarNearbyObs1/551_55_1	centralized	True	-10	True	GridWorld	ISR	FullObsDiscrete	Individual_Q	0.2	0.01	1000000	1
IndivQLearningVarNearbyObs1/552_55_2	centralized	True	-10	True	GridWorld	ISR	FullObsDiscrete	Individual_Q	0.2	0.01	1000000	2
IndivQLearningVarNearbyObs1/553_55_3	centralized	True	-10	True	GridWorld	ISR	FullObsDiscrete	Individual_Q	0.2	0.01	1000000	3
IndivQLearningVarNearbyObs1/554_55_4	centralized	True	-10	True	GridWorld	ISR	FullObsDiscrete	Individual_Q	0.2	0.01	1000000	4
IndivQLearningVarNearbyObs1/555_55_5	centralized	True	-10	True	GridWorld	ISR	FullObsDiscrete	Individual_Q	0.2	0.01	1000000	5
IndivQLearningVarNearbyObs1/556_55_6	centralized	True	-10	True	GridWorld	ISR	FullObsDiscrete	Individual_Q	0.2	0.01	1000000	6
IndivQLearningVarNearbyObs1/557_55_7	centralized	True	-10	True	GridWorld	ISR	FullObsDiscrete	Individual_Q	0.2	0.01	1000000	7
IndivQLearningVarNearbyObs1/558_55_8	centralized	True	-10	True	GridWorld	ISR	FullObsDiscrete	Individual_Q	0.2	0.01	1000000	8
IndivQLearningVarNearbyObs1/559_55_9	centralized	True	-10	True	GridWorld	ISR	FullObsDiscrete	Individual_Q	0.2	0.01	1000000	9
IndivQLearningVarNearbyObs1/560_56_0	decentralized	True	0	True	GridWorld	ISR	NearbyObsDiscrete	Individual_Q	0.2	0.2	1000000	0
IndivQLearningVarNearbyObs1/561_56_1	decentralized	True	0	True	GridWorld	ISR	NearbyObsDiscrete	Individual_Q	0.2	0.2	1000000	1
IndivQLearningVarNearbyObs1/562_56_2	decentralized	True	0	True	GridWorld	ISR	NearbyObsDiscrete	Individual_Q	0.2	0.2	1000000	2
IndivQLearningVarNearbyObs1/563_56_3	decentralized	True	0	True	GridWorld	ISR	NearbyObsDiscrete	Individual_Q	0.2	0.2	1000000	3
IndivQLearningVarNearbyObs1/564_56_4	decentralized	True	0	True	GridWorld	ISR	NearbyObsDiscrete	Individual_Q	0.2	0.2	1000000	4
IndivQLearningVarNearbyObs1/565_56_5	decentralized	True	0	True	GridWorld	ISR	NearbyObsDiscrete	Individual_Q	0.2	0.2	1000000	5
IndivQLearningVarNearbyObs1/566_56_6	decentralized	True	0	True	GridWorld	ISR	NearbyObsDiscrete	Individual_Q	0.2	0.2	1000000	6
IndivQLearningVarNearbyObs1/567_56_7	decentralized	True	0	True	GridWorld	ISR	NearbyObsDiscrete	Individual_Q	0.2	0.2	1000000	7
IndivQLearningVarNearbyObs1/568_56_8	decentralized	True	0	True	GridWorld	ISR	NearbyObsDiscrete	Individual_Q	0.2	0.2	1000000	8
IndivQLearningVarNearbyObs1/569_56_9	decentralized	True	0	True	GridWorld	ISR	NearbyObsDiscrete	Individual_Q	0.2	0.2	1000000	9
IndivQLearningVarNearbyObs1/570_57_0	decentralized	True	-10	True	GridWorld	ISR	NearbyObsDiscrete	Individual_Q	0.2	0.2	1000000	0
IndivQLearningVarNearbyObs1/571_57_1	decentralized	True	-10	True	GridWorld	ISR	NearbyObsDiscrete	Individual_Q	0.2	0.2	1000000	1
IndivQLearningVarNearbyObs1/572_57_2	decentralized	True	-10	True	GridWorld	ISR	NearbyObsDiscrete	Individual_Q	0.2	0.2	1000000	2
IndivQLearningVarNearbyObs1/573_57_3	decentralized	True	-10	True	GridWorld	ISR	NearbyObsDiscrete	Individual_Q	0.2	0.2	1000000	3
IndivQLearningVarNearbyObs1/574_57_4	decentralized	True	-10	True	GridWorld	ISR	NearbyObsDiscrete	Individual_Q	0.2	0.2	1000000	4
IndivQLearningVarNearbyObs1/575_57_5	decentralized	True	-10	True	GridWorld	ISR	NearbyObsDiscrete	Individual_Q	0.2	0.2	1000000	5
IndivQLearningVarNearbyObs1/576_57_6	decentralized	True	-10	True	GridWorld	ISR	NearbyObsDiscrete	Individual_Q	0.2	0.2	1000000	6
IndivQLearningVarNearbyObs1/577_57_7	decentralized	True	-10	True	GridWorld	ISR	NearbyObsDiscrete	Individual_Q	0.2	0.2	1000000	7
IndivQLearningVarNearbyObs1/578_57_8	decentralized	True	-10	True	GridWorld	ISR	NearbyObsDiscrete	Individual_Q	0.2	0.2	1000000	8
IndivQLearningVarNearbyObs1/579_57_9	decentralized	True	-10	True	GridWorld	ISR	NearbyObsDiscrete	Individual_Q	0.2	0.2	1000000	9
IndivQLearningVarNearbyObs1/580_58_0	decentralized	True	0	True	GridWorld	ISR	NearbyObsDiscrete	Individual_Q	0.2	0.01	1000000	0
IndivQLearningVarNearbyObs1/581_58_1	decentralized	True	0	True	GridWorld	ISR	NearbyObsDiscrete	Individual_Q	0.2	0.01	1000000	1
IndivQLearningVarNearbyObs1/582_58_2	decentralized	True	0	True	GridWorld	ISR	NearbyObsDiscrete	Individual_Q	0.2	0.01	1000000	2
IndivQLearningVarNearbyObs1/583_58_3	decentralized	True	0	True	GridWorld	ISR	NearbyObsDiscrete	Individual_Q	0.2	0.01	1000000	3
IndivQLearningVarNearbyObs1/584_58_4	decentralized	True	0	True	GridWorld	ISR	NearbyObsDiscrete	Individual_Q	0.2	0.01	1000000	4
IndivQLearningVarNearbyObs1/585_58_5	decentralized	True	0	True	GridWorld	ISR	NearbyObsDiscrete	Individual_Q	0.2	0.01	1000000	5
IndivQLearningVarNearbyObs1/586_58_6	decentralized	True	0	True	GridWorld	ISR	NearbyObsDiscrete	Individual_Q	0.2	0.01	1000000	6
IndivQLearningVarNearbyObs1/587_58_7	decentralized	True	0	True	GridWorld	ISR	NearbyObsDiscrete	Individual_Q	0.2	0.01	1000000	7
IndivQLearningVarNearbyObs1/588_58_8	decentralized	True	0	True	GridWorld	ISR	NearbyObsDiscrete	Individual_Q	0.2	0.01	1000000	8
IndivQLearningVarNearbyObs1/589_58_9	decentralized	True	0	True	GridWorld	ISR	NearbyObsDiscrete	Individual_Q	0.2	0.01	1000000	9
IndivQLearningVarNearbyObs1/590_59_0	decentralized	True	-10	True	GridWorld	ISR	NearbyObsDiscrete	Individual_Q	0.2	0.01	1000000	0
IndivQLearningVarNearbyObs1/591_59_1	decentralized	True	-10	True	GridWorld	ISR	NearbyObsDiscrete	Individual_Q	0.2	0.01	1000000	1
IndivQLearningVarNearbyObs1/592_59_2	decentralized	True	-10	True	GridWorld	ISR	NearbyObsDiscrete	Individual_Q	0.2	0.01	1000000	2
IndivQLearningVarNearbyObs1/593_59_3	decentralized	True	-10	True	GridWorld	ISR	NearbyObsDiscrete	Individual_Q	0.2	0.01	1000000	3
IndivQLearningVarNearbyObs1/594_59_4	decentralized	True	-10	True	GridWorld	ISR	NearbyObsDiscrete	Individual_Q	0.2	0.01	1000000	4
IndivQLearningVarNearbyObs1/595_59_5	decentralized	True	-10	True	GridWorld	ISR	NearbyObsDiscrete	Individual_Q	0.2	0.01	1000000	5
IndivQLearningVarNearbyObs1/596_59_6	decentralized	True	-10	True	GridWorld	ISR	NearbyObsDiscrete	Individual_Q	0.2	0.01	1000000	6
IndivQLearningVarNearbyObs1/597_59_7	decentralized	True	-10	True	GridWorld	ISR	NearbyObsDiscrete	Individual_Q	0.2	0.01	1000000	7
IndivQLearningVarNearbyObs1/598_59_8	decentralized	True	-10	True	GridWorld	ISR	NearbyObsDiscrete	Individual_Q	0.2	0.01	1000000	8
IndivQLearningVarNearbyObs1/599_59_9	decentralized	True	-10	True	GridWorld	ISR	NearbyObsDiscrete	Individual_Q	0.2	0.01	1000000	9
IndivQLearningVarNearbyObs1/600_60_0	decentralized	True	0	True	GridWorld	ISR	FullObsDiscrete	Individual_Q	0.2	0.2	1000000	0
IndivQLearningVarNearbyObs1/601_60_1	decentralized	True	0	True	GridWorld	ISR	FullObsDiscrete	Individual_Q	0.2	0.2	1000000	1
IndivQLearningVarNearbyObs1/602_60_2	decentralized	True	0	True	GridWorld	ISR	FullObsDiscrete	Individual_Q	0.2	0.2	1000000	2
IndivQLearningVarNearbyObs1/603_60_3	decentralized	True	0	True	GridWorld	ISR	FullObsDiscrete	Individual_Q	0.2	0.2	1000000	3
IndivQLearningVarNearbyObs1/604_60_4	decentralized	True	0	True	GridWorld	ISR	FullObsDiscrete	Individual_Q	0.2	0.2	1000000	4
IndivQLearningVarNearbyObs1/605_60_5	decentralized	True	0	True	GridWorld	ISR	FullObsDiscrete	Individual_Q	0.2	0.2	1000000	5
IndivQLearningVarNearbyObs1/606_60_6	decentralized	True	0	True	GridWorld	ISR	FullObsDiscrete	Individual_Q	0.2	0.2	1000000	6
IndivQLearningVarNearbyObs1/607_60_7	decentralized	True	0	True	GridWorld	ISR	FullObsDiscrete	Individual_Q	0.2	0.2	1000000	7
IndivQLearningVarNearbyObs1/608_60_8	decentralized	True	0	True	GridWorld	ISR	FullObsDiscrete	Individual_Q	0.2	0.2	1000000	8
IndivQLearningVarNearbyObs1/609_60_9	decentralized	True	0	True	GridWorld	ISR	FullObsDiscrete	Individual_Q	0.2	0.2	1000000	9
IndivQLearningVarNearbyObs1/610_61_0	decentralized	True	-10	True	GridWorld	ISR	FullObsDiscrete	Individual_Q	0.2	0.2	1000000	0
IndivQLearningVarNearbyObs1/611_61_1	decentralized	True	-10	True	GridWorld	ISR	FullObsDiscrete	Individual_Q	0.2	0.2	1000000	1
IndivQLearningVarNearbyObs1/612_61_2	decentralized	True	-10	True	GridWorld	ISR	FullObsDiscrete	Individual_Q	0.2	0.2	1000000	2
IndivQLearningVarNearbyObs1/613_61_3	decentralized	True	-10	True	GridWorld	ISR	FullObsDiscrete	Individual_Q	0.2	0.2	1000000	3
IndivQLearningVarNearbyObs1/614_61_4	decentralized	True	-10	True	GridWorld	ISR	FullObsDiscrete	Individual_Q	0.2	0.2	1000000	4
IndivQLearningVarNearbyObs1/615_61_5	decentralized	True	-10	True	GridWorld	ISR	FullObsDiscrete	Individual_Q	0.2	0.2	1000000	5
IndivQLearningVarNearbyObs1/616_61_6	decentralized	True	-10	True	GridWorld	ISR	FullObsDiscrete	Individual_Q	0.2	0.2	1000000	6
IndivQLearningVarNearbyObs1/617_61_7	decentralized	True	-10	True	GridWorld	ISR	FullObsDiscrete	Individual_Q	0.2	0.2	1000000	7
IndivQLearningVarNearbyObs1/618_61_8	decentralized	True	-10	True	GridWorld	ISR	FullObsDiscrete	Individual_Q	0.2	0.2	1000000	8
IndivQLearningVarNearbyObs1/619_61_9	decentralized	True	-10	True	GridWorld	ISR	FullObsDiscrete	Individual_Q	0.2	0.2	1000000	9
IndivQLearningVarNearbyObs1/620_62_0	decentralized	True	0	True	GridWorld	ISR	FullObsDiscrete	Individual_Q	0.2	0.01	1000000	0
IndivQLearningVarNearbyObs1/621_62_1	decentralized	True	0	True	GridWorld	ISR	FullObsDiscrete	Individual_Q	0.2	0.01	1000000	1
IndivQLearningVarNearbyObs1/622_62_2	decentralized	True	0	True	GridWorld	ISR	FullObsDiscrete	Individual_Q	0.2	0.01	1000000	2
IndivQLearningVarNearbyObs1/623_62_3	decentralized	True	0	True	GridWorld	ISR	FullObsDiscrete	Individual_Q	0.2	0.01	1000000	3
IndivQLearningVarNearbyObs1/624_62_4	decentralized	True	0	True	GridWorld	ISR	FullObsDiscrete	Individual_Q	0.2	0.01	1000000	4
IndivQLearningVarNearbyObs1/625_62_5	decentralized	True	0	True	GridWorld	ISR	FullObsDiscrete	Individual_Q	0.2	0.01	1000000	5
IndivQLearningVarNearbyObs1/626_62_6	decentralized	True	0	True	GridWorld	ISR	FullObsDiscrete	Individual_Q	0.2	0.01	1000000	6
IndivQLearningVarNearbyObs1/627_62_7	decentralized	True	0	True	GridWorld	ISR	FullObsDiscrete	Individual_Q	0.2	0.01	1000000	7
IndivQLearningVarNearbyObs1/628_62_8	decentralized	True	0	True	GridWorld	ISR	FullObsDiscrete	Individual_Q	0.2	0.01	1000000	8
IndivQLearningVarNearbyObs1/629_62_9	decentralized	True	0	True	GridWorld	ISR	FullObsDiscrete	Individual_Q	0.2	0.01	1000000	9
IndivQLearningVarNearbyObs1/630_63_0	decentralized	True	-10	True	GridWorld	ISR	FullObsDiscrete	Individual_Q	0.2	0.01	1000000	0
IndivQLearningVarNearbyObs1/631_63_1	decentralized	True	-10	True	GridWorld	ISR	FullObsDiscrete	Individual_Q	0.2	0.01	1000000	1
IndivQLearningVarNearbyObs1/632_63_2	decentralized	True	-10	True	GridWorld	ISR	FullObsDiscrete	Individual_Q	0.2	0.01	1000000	2
IndivQLearningVarNearbyObs1/633_63_3	decentralized	True	-10	True	GridWorld	ISR	FullObsDiscrete	Individual_Q	0.2	0.01	1000000	3
IndivQLearningVarNearbyObs1/634_63_4	decentralized	True	-10	True	GridWorld	ISR	FullObsDiscrete	Individual_Q	0.2	0.01	1000000	4
IndivQLearningVarNearbyObs1/635_63_5	decentralized	True	-10	True	GridWorld	ISR	FullObsDiscrete	Individual_Q	0.2	0.01	1000000	5
IndivQLearningVarNearbyObs1/636_63_6	decentralized	True	-10	True	GridWorld	ISR	FullObsDiscrete	Individual_Q	0.2	0.01	1000000	6
IndivQLearningVarNearbyObs1/637_63_7	decentralized	True	-10	True	GridWorld	ISR	FullObsDiscrete	Individual_Q	0.2	0.01	1000000	7
IndivQLearningVarNearbyObs1/638_63_8	decentralized	True	-10	True	GridWorld	ISR	FullObsDiscrete	Individual_Q	0.2	0.01	1000000	8
IndivQLearningVarNearbyObs1/639_63_9	decentralized	True	-10	True	GridWorld	ISR	FullObsDiscrete	Individual_Q	0.2	0.01	1000000	9
IndivQLearningVarNearbyObs1/640_64_0	none	True	0	True	GridWorld	ISR	NearbyObsDiscrete	Individual_Q	0.2	0.2	1000000	0
IndivQLearningVarNearbyObs1/641_64_1	none	True	0	True	GridWorld	ISR	NearbyObsDiscrete	Individual_Q	0.2	0.2	1000000	1
IndivQLearningVarNearbyObs1/642_64_2	none	True	0	True	GridWorld	ISR	NearbyObsDiscrete	Individual_Q	0.2	0.2	1000000	2
IndivQLearningVarNearbyObs1/643_64_3	none	True	0	True	GridWorld	ISR	NearbyObsDiscrete	Individual_Q	0.2	0.2	1000000	3
IndivQLearningVarNearbyObs1/644_64_4	none	True	0	True	GridWorld	ISR	NearbyObsDiscrete	Individual_Q	0.2	0.2	1000000	4
IndivQLearningVarNearbyObs1/645_64_5	none	True	0	True	GridWorld	ISR	NearbyObsDiscrete	Individual_Q	0.2	0.2	1000000	5
IndivQLearningVarNearbyObs1/646_64_6	none	True	0	True	GridWorld	ISR	NearbyObsDiscrete	Individual_Q	0.2	0.2	1000000	6
IndivQLearningVarNearbyObs1/647_64_7	none	True	0	True	GridWorld	ISR	NearbyObsDiscrete	Individual_Q	0.2	0.2	1000000	7
IndivQLearningVarNearbyObs1/648_64_8	none	True	0	True	GridWorld	ISR	NearbyObsDiscrete	Individual_Q	0.2	0.2	1000000	8
IndivQLearningVarNearbyObs1/649_64_9	none	True	0	True	GridWorld	ISR	NearbyObsDiscrete	Individual_Q	0.2	0.2	1000000	9
IndivQLearningVarNearbyObs1/650_65_0	none	True	-10	True	GridWorld	ISR	NearbyObsDiscrete	Individual_Q	0.2	0.2	1000000	0
IndivQLearningVarNearbyObs1/651_65_1	none	True	-10	True	GridWorld	ISR	NearbyObsDiscrete	Individual_Q	0.2	0.2	1000000	1
IndivQLearningVarNearbyObs1/652_65_2	none	True	-10	True	GridWorld	ISR	NearbyObsDiscrete	Individual_Q	0.2	0.2	1000000	2
IndivQLearningVarNearbyObs1/653_65_3	none	True	-10	True	GridWorld	ISR	NearbyObsDiscrete	Individual_Q	0.2	0.2	1000000	3
IndivQLearningVarNearbyObs1/654_65_4	none	True	-10	True	GridWorld	ISR	NearbyObsDiscrete	Individual_Q	0.2	0.2	1000000	4
IndivQLearningVarNearbyObs1/655_65_5	none	True	-10	True	GridWorld	ISR	NearbyObsDiscrete	Individual_Q	0.2	0.2	1000000	5
IndivQLearningVarNearbyObs1/656_65_6	none	True	-10	True	GridWorld	ISR	NearbyObsDiscrete	Individual_Q	0.2	0.2	1000000	6
IndivQLearningVarNearbyObs1/657_65_7	none	True	-10	True	GridWorld	ISR	NearbyObsDiscrete	Individual_Q	0.2	0.2	1000000	7
IndivQLearningVarNearbyObs1/658_65_8	none	True	-10	True	GridWorld	ISR	NearbyObsDiscrete	Individual_Q	0.2	0.2	1000000	8
IndivQLearningVarNearbyObs1/659_65_9	none	True	-10	True	GridWorld	ISR	NearbyObsDiscrete	Individual_Q	0.2	0.2	1000000	9
IndivQLearningVarNearbyObs1/660_66_0	none	True	0	True	GridWorld	ISR	NearbyObsDiscrete	Individual_Q	0.2	0.01	1000000	0
IndivQLearningVarNearbyObs1/661_66_1	none	True	0	True	GridWorld	ISR	NearbyObsDiscrete	Individual_Q	0.2	0.01	1000000	1
IndivQLearningVarNearbyObs1/662_66_2	none	True	0	True	GridWorld	ISR	NearbyObsDiscrete	Individual_Q	0.2	0.01	1000000	2
IndivQLearningVarNearbyObs1/663_66_3	none	True	0	True	GridWorld	ISR	NearbyObsDiscrete	Individual_Q	0.2	0.01	1000000	3
IndivQLearningVarNearbyObs1/664_66_4	none	True	0	True	GridWorld	ISR	NearbyObsDiscrete	Individual_Q	0.2	0.01	1000000	4
IndivQLearningVarNearbyObs1/665_66_5	none	True	0	True	GridWorld	ISR	NearbyObsDiscrete	Individual_Q	0.2	0.01	1000000	5
IndivQLearningVarNearbyObs1/666_66_6	none	True	0	True	GridWorld	ISR	NearbyObsDiscrete	Individual_Q	0.2	0.01	1000000	6
IndivQLearningVarNearbyObs1/667_66_7	none	True	0	True	GridWorld	ISR	NearbyObsDiscrete	Individual_Q	0.2	0.01	1000000	7
IndivQLearningVarNearbyObs1/668_66_8	none	True	0	True	GridWorld	ISR	NearbyObsDiscrete	Individual_Q	0.2	0.01	1000000	8
IndivQLearningVarNearbyObs1/669_66_9	none	True	0	True	GridWorld	ISR	NearbyObsDiscrete	Individual_Q	0.2	0.01	1000000	9
IndivQLearningVarNearbyObs1/670_67_0	none	True	-10	True	GridWorld	ISR	NearbyObsDiscrete	Individual_Q	0.2	0.01	1000000	0
IndivQLearningVarNearbyObs1/671_67_1	none	True	-10	True	GridWorld	ISR	NearbyObsDiscrete	Individual_Q	0.2	0.01	1000000	1
IndivQLearningVarNearbyObs1/672_67_2	none	True	-10	True	GridWorld	ISR	NearbyObsDiscrete	Individual_Q	0.2	0.01	1000000	2
IndivQLearningVarNearbyObs1/673_67_3	none	True	-10	True	GridWorld	ISR	NearbyObsDiscrete	Individual_Q	0.2	0.01	1000000	3
IndivQLearningVarNearbyObs1/674_67_4	none	True	-10	True	GridWorld	ISR	NearbyObsDiscrete	Individual_Q	0.2	0.01	1000000	4
IndivQLearningVarNearbyObs1/675_67_5	none	True	-10	True	GridWorld	ISR	NearbyObsDiscrete	Individual_Q	0.2	0.01	1000000	5
IndivQLearningVarNearbyObs1/676_67_6	none	True	-10	True	GridWorld	ISR	NearbyObsDiscrete	Individual_Q	0.2	0.01	1000000	6
IndivQLearningVarNearbyObs1/677_67_7	none	True	-10	True	GridWorld	ISR	NearbyObsDiscrete	Individual_Q	0.2	0.01	1000000	7
IndivQLearningVarNearbyObs1/678_67_8	none	True	-10	True	GridWorld	ISR	NearbyObsDiscrete	Individual_Q	0.2	0.01	1000000	8
IndivQLearningVarNearbyObs1/679_67_9	none	True	-10	True	GridWorld	ISR	NearbyObsDiscrete	Individual_Q	0.2	0.01	1000000	9
IndivQLearningVarNearbyObs1/680_68_0	none	True	0	True	GridWorld	ISR	FullObsDiscrete	Individual_Q	0.2	0.2	1000000	0
IndivQLearningVarNearbyObs1/681_68_1	none	True	0	True	GridWorld	ISR	FullObsDiscrete	Individual_Q	0.2	0.2	1000000	1
IndivQLearningVarNearbyObs1/682_68_2	none	True	0	True	GridWorld	ISR	FullObsDiscrete	Individual_Q	0.2	0.2	1000000	2
IndivQLearningVarNearbyObs1/683_68_3	none	True	0	True	GridWorld	ISR	FullObsDiscrete	Individual_Q	0.2	0.2	1000000	3
IndivQLearningVarNearbyObs1/684_68_4	none	True	0	True	GridWorld	ISR	FullObsDiscrete	Individual_Q	0.2	0.2	1000000	4
IndivQLearningVarNearbyObs1/685_68_5	none	True	0	True	GridWorld	ISR	FullObsDiscrete	Individual_Q	0.2	0.2	1000000	5
IndivQLearningVarNearbyObs1/686_68_6	none	True	0	True	GridWorld	ISR	FullObsDiscrete	Individual_Q	0.2	0.2	1000000	6
IndivQLearningVarNearbyObs1/687_68_7	none	True	0	True	GridWorld	ISR	FullObsDiscrete	Individual_Q	0.2	0.2	1000000	7
IndivQLearningVarNearbyObs1/688_68_8	none	True	0	True	GridWorld	ISR	FullObsDiscrete	Individual_Q	0.2	0.2	1000000	8
IndivQLearningVarNearbyObs1/689_68_9	none	True	0	True	GridWorld	ISR	FullObsDiscrete	Individual_Q	0.2	0.2	1000000	9
IndivQLearningVarNearbyObs1/690_69_0	none	True	-10	True	GridWorld	ISR	FullObsDiscrete	Individual_Q	0.2	0.2	1000000	0
IndivQLearningVarNearbyObs1/691_69_1	none	True	-10	True	GridWorld	ISR	FullObsDiscrete	Individual_Q	0.2	0.2	1000000	1
IndivQLearningVarNearbyObs1/692_69_2	none	True	-10	True	GridWorld	ISR	FullObsDiscrete	Individual_Q	0.2	0.2	1000000	2
IndivQLearningVarNearbyObs1/693_69_3	none	True	-10	True	GridWorld	ISR	FullObsDiscrete	Individual_Q	0.2	0.2	1000000	3
IndivQLearningVarNearbyObs1/694_69_4	none	True	-10	True	GridWorld	ISR	FullObsDiscrete	Individual_Q	0.2	0.2	1000000	4
IndivQLearningVarNearbyObs1/695_69_5	none	True	-10	True	GridWorld	ISR	FullObsDiscrete	Individual_Q	0.2	0.2	1000000	5
IndivQLearningVarNearbyObs1/696_69_6	none	True	-10	True	GridWorld	ISR	FullObsDiscrete	Individual_Q	0.2	0.2	1000000	6
IndivQLearningVarNearbyObs1/697_69_7	none	True	-10	True	GridWorld	ISR	FullObsDiscrete	Individual_Q	0.2	0.2	1000000	7
IndivQLearningVarNearbyObs1/698_69_8	none	True	-10	True	GridWorld	ISR	FullObsDiscrete	Individual_Q	0.2	0.2	1000000	8
IndivQLearningVarNearbyObs1/699_69_9	none	True	-10	True	GridWorld	ISR	FullObsDiscrete	Individual_Q	0.2	0.2	1000000	9
IndivQLearningVarNearbyObs1/700_70_0	none	True	0	True	GridWorld	ISR	FullObsDiscrete	Individual_Q	0.2	0.01	1000000	0
IndivQLearningVarNearbyObs1/701_70_1	none	True	0	True	GridWorld	ISR	FullObsDiscrete	Individual_Q	0.2	0.01	1000000	1
IndivQLearningVarNearbyObs1/702_70_2	none	True	0	True	GridWorld	ISR	FullObsDiscrete	Individual_Q	0.2	0.01	1000000	2
IndivQLearningVarNearbyObs1/703_70_3	none	True	0	True	GridWorld	ISR	FullObsDiscrete	Individual_Q	0.2	0.01	1000000	3
IndivQLearningVarNearbyObs1/704_70_4	none	True	0	True	GridWorld	ISR	FullObsDiscrete	Individual_Q	0.2	0.01	1000000	4
IndivQLearningVarNearbyObs1/705_70_5	none	True	0	True	GridWorld	ISR	FullObsDiscrete	Individual_Q	0.2	0.01	1000000	5
IndivQLearningVarNearbyObs1/706_70_6	none	True	0	True	GridWorld	ISR	FullObsDiscrete	Individual_Q	0.2	0.01	1000000	6
IndivQLearningVarNearbyObs1/707_70_7	none	True	0	True	GridWorld	ISR	FullObsDiscrete	Individual_Q	0.2	0.01	1000000	7
IndivQLearningVarNearbyObs1/708_70_8	none	True	0	True	GridWorld	ISR	FullObsDiscrete	Individual_Q	0.2	0.01	1000000	8
IndivQLearningVarNearbyObs1/709_70_9	none	True	0	True	GridWorld	ISR	FullObsDiscrete	Individual_Q	0.2	0.01	1000000	9
IndivQLearningVarNearbyObs1/710_71_0	none	True	-10	True	GridWorld	ISR	FullObsDiscrete	Individual_Q	0.2	0.01	1000000	0
IndivQLearningVarNearbyObs1/711_71_1	none	True	-10	True	GridWorld	ISR	FullObsDiscrete	Individual_Q	0.2	0.01	1000000	1
IndivQLearningVarNearbyObs1/712_71_2	none	True	-10	True	GridWorld	ISR	FullObsDiscrete	Individual_Q	0.2	0.01	1000000	2
IndivQLearningVarNearbyObs1/713_71_3	none	True	-10	True	GridWorld	ISR	FullObsDiscrete	Individual_Q	0.2	0.01	1000000	3
IndivQLearningVarNearbyObs1/714_71_4	none	True	-10	True	GridWorld	ISR	FullObsDiscrete	Individual_Q	0.2	0.01	1000000	4
IndivQLearningVarNearbyObs1/715_71_5	none	True	-10	True	GridWorld	ISR	FullObsDiscrete	Individual_Q	0.2	0.01	1000000	5
IndivQLearningVarNearbyObs1/716_71_6	none	True	-10	True	GridWorld	ISR	FullObsDiscrete	Individual_Q	0.2	0.01	1000000	6
IndivQLearningVarNearbyObs1/717_71_7	none	True	-10	True	GridWorld	ISR	FullObsDiscrete	Individual_Q	0.2	0.01	1000000	7
IndivQLearningVarNearbyObs1/718_71_8	none	True	-10	True	GridWorld	ISR	FullObsDiscrete	Individual_Q	0.2	0.01	1000000	8
IndivQLearningVarNearbyObs1/719_71_9	none	True	-10	True	GridWorld	ISR	FullObsDiscrete	Individual_Q	0.2	0.01	1000000	9
IndivQLearningVarNearbyObs1/720_72_0	centralized	True	0	False	GridWorld	ISR	NearbyObsDiscrete	Individual_Q	0.2	0.2	1000000	0
IndivQLearningVarNearbyObs1/721_72_1	centralized	True	0	False	GridWorld	ISR	NearbyObsDiscrete	Individual_Q	0.2	0.2	1000000	1
IndivQLearningVarNearbyObs1/722_72_2	centralized	True	0	False	GridWorld	ISR	NearbyObsDiscrete	Individual_Q	0.2	0.2	1000000	2
IndivQLearningVarNearbyObs1/723_72_3	centralized	True	0	False	GridWorld	ISR	NearbyObsDiscrete	Individual_Q	0.2	0.2	1000000	3
IndivQLearningVarNearbyObs1/724_72_4	centralized	True	0	False	GridWorld	ISR	NearbyObsDiscrete	Individual_Q	0.2	0.2	1000000	4
IndivQLearningVarNearbyObs1/725_72_5	centralized	True	0	False	GridWorld	ISR	NearbyObsDiscrete	Individual_Q	0.2	0.2	1000000	5
IndivQLearningVarNearbyObs1/726_72_6	centralized	True	0	False	GridWorld	ISR	NearbyObsDiscrete	Individual_Q	0.2	0.2	1000000	6
IndivQLearningVarNearbyObs1/727_72_7	centralized	True	0	False	GridWorld	ISR	NearbyObsDiscrete	Individual_Q	0.2	0.2	1000000	7
IndivQLearningVarNearbyObs1/728_72_8	centralized	True	0	False	GridWorld	ISR	NearbyObsDiscrete	Individual_Q	0.2	0.2	1000000	8
IndivQLearningVarNearbyObs1/729_72_9	centralized	True	0	False	GridWorld	ISR	NearbyObsDiscrete	Individual_Q	0.2	0.2	1000000	9
IndivQLearningVarNearbyObs1/730_73_0	centralized	True	-10	False	GridWorld	ISR	NearbyObsDiscrete	Individual_Q	0.2	0.2	1000000	0
IndivQLearningVarNearbyObs1/731_73_1	centralized	True	-10	False	GridWorld	ISR	NearbyObsDiscrete	Individual_Q	0.2	0.2	1000000	1
IndivQLearningVarNearbyObs1/732_73_2	centralized	True	-10	False	GridWorld	ISR	NearbyObsDiscrete	Individual_Q	0.2	0.2	1000000	2
IndivQLearningVarNearbyObs1/733_73_3	centralized	True	-10	False	GridWorld	ISR	NearbyObsDiscrete	Individual_Q	0.2	0.2	1000000	3
IndivQLearningVarNearbyObs1/734_73_4	centralized	True	-10	False	GridWorld	ISR	NearbyObsDiscrete	Individual_Q	0.2	0.2	1000000	4
IndivQLearningVarNearbyObs1/735_73_5	centralized	True	-10	False	GridWorld	ISR	NearbyObsDiscrete	Individual_Q	0.2	0.2	1000000	5
IndivQLearningVarNearbyObs1/736_73_6	centralized	True	-10	False	GridWorld	ISR	NearbyObsDiscrete	Individual_Q	0.2	0.2	1000000	6
IndivQLearningVarNearbyObs1/737_73_7	centralized	True	-10	False	GridWorld	ISR	NearbyObsDiscrete	Individual_Q	0.2	0.2	1000000	7
IndivQLearningVarNearbyObs1/738_73_8	centralized	True	-10	False	GridWorld	ISR	NearbyObsDiscrete	Individual_Q	0.2	0.2	1000000	8
IndivQLearningVarNearbyObs1/739_73_9	centralized	True	-10	False	GridWorld	ISR	NearbyObsDiscrete	Individual_Q	0.2	0.2	1000000	9
IndivQLearningVarNearbyObs1/740_74_0	centralized	True	0	False	GridWorld	ISR	NearbyObsDiscrete	Individual_Q	0.2	0.01	1000000	0
IndivQLearningVarNearbyObs1/741_74_1	centralized	True	0	False	GridWorld	ISR	NearbyObsDiscrete	Individual_Q	0.2	0.01	1000000	1
IndivQLearningVarNearbyObs1/742_74_2	centralized	True	0	False	GridWorld	ISR	NearbyObsDiscrete	Individual_Q	0.2	0.01	1000000	2
IndivQLearningVarNearbyObs1/743_74_3	centralized	True	0	False	GridWorld	ISR	NearbyObsDiscrete	Individual_Q	0.2	0.01	1000000	3
IndivQLearningVarNearbyObs1/744_74_4	centralized	True	0	False	GridWorld	ISR	NearbyObsDiscrete	Individual_Q	0.2	0.01	1000000	4
IndivQLearningVarNearbyObs1/745_74_5	centralized	True	0	False	GridWorld	ISR	NearbyObsDiscrete	Individual_Q	0.2	0.01	1000000	5
IndivQLearningVarNearbyObs1/746_74_6	centralized	True	0	False	GridWorld	ISR	NearbyObsDiscrete	Individual_Q	0.2	0.01	1000000	6
IndivQLearningVarNearbyObs1/747_74_7	centralized	True	0	False	GridWorld	ISR	NearbyObsDiscrete	Individual_Q	0.2	0.01	1000000	7
IndivQLearningVarNearbyObs1/748_74_8	centralized	True	0	False	GridWorld	ISR	NearbyObsDiscrete	Individual_Q	0.2	0.01	1000000	8
IndivQLearningVarNearbyObs1/749_74_9	centralized	True	0	False	GridWorld	ISR	NearbyObsDiscrete	Individual_Q	0.2	0.01	1000000	9
IndivQLearningVarNearbyObs1/750_75_0	centralized	True	-10	False	GridWorld	ISR	NearbyObsDiscrete	Individual_Q	0.2	0.01	1000000	0
IndivQLearningVarNearbyObs1/751_75_1	centralized	True	-10	False	GridWorld	ISR	NearbyObsDiscrete	Individual_Q	0.2	0.01	1000000	1
IndivQLearningVarNearbyObs1/752_75_2	centralized	True	-10	False	GridWorld	ISR	NearbyObsDiscrete	Individual_Q	0.2	0.01	1000000	2
IndivQLearningVarNearbyObs1/753_75_3	centralized	True	-10	False	GridWorld	ISR	NearbyObsDiscrete	Individual_Q	0.2	0.01	1000000	3
IndivQLearningVarNearbyObs1/754_75_4	centralized	True	-10	False	GridWorld	ISR	NearbyObsDiscrete	Individual_Q	0.2	0.01	1000000	4
IndivQLearningVarNearbyObs1/755_75_5	centralized	True	-10	False	GridWorld	ISR	NearbyObsDiscrete	Individual_Q	0.2	0.01	1000000	5
IndivQLearningVarNearbyObs1/756_75_6	centralized	True	-10	False	GridWorld	ISR	NearbyObsDiscrete	Individual_Q	0.2	0.01	1000000	6
IndivQLearningVarNearbyObs1/757_75_7	centralized	True	-10	False	GridWorld	ISR	NearbyObsDiscrete	Individual_Q	0.2	0.01	1000000	7
IndivQLearningVarNearbyObs1/758_75_8	centralized	True	-10	False	GridWorld	ISR	NearbyObsDiscrete	Individual_Q	0.2	0.01	1000000	8
IndivQLearningVarNearbyObs1/759_75_9	centralized	True	-10	False	GridWorld	ISR	NearbyObsDiscrete	Individual_Q	0.2	0.01	1000000	9
IndivQLearningVarNearbyObs1/760_76_0	centralized	True	0	False	GridWorld	ISR	FullObsDiscrete	Individual_Q	0.2	0.2	1000000	0
IndivQLearningVarNearbyObs1/761_76_1	centralized	True	0	False	GridWorld	ISR	FullObsDiscrete	Individual_Q	0.2	0.2	1000000	1
IndivQLearningVarNearbyObs1/762_76_2	centralized	True	0	False	GridWorld	ISR	FullObsDiscrete	Individual_Q	0.2	0.2	1000000	2
IndivQLearningVarNearbyObs1/763_76_3	centralized	True	0	False	GridWorld	ISR	FullObsDiscrete	Individual_Q	0.2	0.2	1000000	3
IndivQLearningVarNearbyObs1/764_76_4	centralized	True	0	False	GridWorld	ISR	FullObsDiscrete	Individual_Q	0.2	0.2	1000000	4
IndivQLearningVarNearbyObs1/765_76_5	centralized	True	0	False	GridWorld	ISR	FullObsDiscrete	Individual_Q	0.2	0.2	1000000	5
IndivQLearningVarNearbyObs1/766_76_6	centralized	True	0	False	GridWorld	ISR	FullObsDiscrete	Individual_Q	0.2	0.2	1000000	6
IndivQLearningVarNearbyObs1/767_76_7	centralized	True	0	False	GridWorld	ISR	FullObsDiscrete	Individual_Q	0.2	0.2	1000000	7
IndivQLearningVarNearbyObs1/768_76_8	centralized	True	0	False	GridWorld	ISR	FullObsDiscrete	Individual_Q	0.2	0.2	1000000	8
IndivQLearningVarNearbyObs1/769_76_9	centralized	True	0	False	GridWorld	ISR	FullObsDiscrete	Individual_Q	0.2	0.2	1000000	9
IndivQLearningVarNearbyObs1/770_77_0	centralized	True	-10	False	GridWorld	ISR	FullObsDiscrete	Individual_Q	0.2	0.2	1000000	0
IndivQLearningVarNearbyObs1/771_77_1	centralized	True	-10	False	GridWorld	ISR	FullObsDiscrete	Individual_Q	0.2	0.2	1000000	1
IndivQLearningVarNearbyObs1/772_77_2	centralized	True	-10	False	GridWorld	ISR	FullObsDiscrete	Individual_Q	0.2	0.2	1000000	2
IndivQLearningVarNearbyObs1/773_77_3	centralized	True	-10	False	GridWorld	ISR	FullObsDiscrete	Individual_Q	0.2	0.2	1000000	3
IndivQLearningVarNearbyObs1/774_77_4	centralized	True	-10	False	GridWorld	ISR	FullObsDiscrete	Individual_Q	0.2	0.2	1000000	4
IndivQLearningVarNearbyObs1/775_77_5	centralized	True	-10	False	GridWorld	ISR	FullObsDiscrete	Individual_Q	0.2	0.2	1000000	5
IndivQLearningVarNearbyObs1/776_77_6	centralized	True	-10	False	GridWorld	ISR	FullObsDiscrete	Individual_Q	0.2	0.2	1000000	6
IndivQLearningVarNearbyObs1/777_77_7	centralized	True	-10	False	GridWorld	ISR	FullObsDiscrete	Individual_Q	0.2	0.2	1000000	7
IndivQLearningVarNearbyObs1/778_77_8	centralized	True	-10	False	GridWorld	ISR	FullObsDiscrete	Individual_Q	0.2	0.2	1000000	8
IndivQLearningVarNearbyObs1/779_77_9	centralized	True	-10	False	GridWorld	ISR	FullObsDiscrete	Individual_Q	0.2	0.2	1000000	9
IndivQLearningVarNearbyObs1/780_78_0	centralized	True	0	False	GridWorld	ISR	FullObsDiscrete	Individual_Q	0.2	0.01	1000000	0
IndivQLearningVarNearbyObs1/781_78_1	centralized	True	0	False	GridWorld	ISR	FullObsDiscrete	Individual_Q	0.2	0.01	1000000	1
IndivQLearningVarNearbyObs1/782_78_2	centralized	True	0	False	GridWorld	ISR	FullObsDiscrete	Individual_Q	0.2	0.01	1000000	2
IndivQLearningVarNearbyObs1/783_78_3	centralized	True	0	False	GridWorld	ISR	FullObsDiscrete	Individual_Q	0.2	0.01	1000000	3
IndivQLearningVarNearbyObs1/784_78_4	centralized	True	0	False	GridWorld	ISR	FullObsDiscrete	Individual_Q	0.2	0.01	1000000	4
IndivQLearningVarNearbyObs1/785_78_5	centralized	True	0	False	GridWorld	ISR	FullObsDiscrete	Individual_Q	0.2	0.01	1000000	5
IndivQLearningVarNearbyObs1/786_78_6	centralized	True	0	False	GridWorld	ISR	FullObsDiscrete	Individual_Q	0.2	0.01	1000000	6
IndivQLearningVarNearbyObs1/787_78_7	centralized	True	0	False	GridWorld	ISR	FullObsDiscrete	Individual_Q	0.2	0.01	1000000	7
IndivQLearningVarNearbyObs1/788_78_8	centralized	True	0	False	GridWorld	ISR	FullObsDiscrete	Individual_Q	0.2	0.01	1000000	8
IndivQLearningVarNearbyObs1/789_78_9	centralized	True	0	False	GridWorld	ISR	FullObsDiscrete	Individual_Q	0.2	0.01	1000000	9
IndivQLearningVarNearbyObs1/790_79_0	centralized	True	-10	False	GridWorld	ISR	FullObsDiscrete	Individual_Q	0.2	0.01	1000000	0
IndivQLearningVarNearbyObs1/791_79_1	centralized	True	-10	False	GridWorld	ISR	FullObsDiscrete	Individual_Q	0.2	0.01	1000000	1
IndivQLearningVarNearbyObs1/792_79_2	centralized	True	-10	False	GridWorld	ISR	FullObsDiscrete	Individual_Q	0.2	0.01	1000000	2
IndivQLearningVarNearbyObs1/793_79_3	centralized	True	-10	False	GridWorld	ISR	FullObsDiscrete	Individual_Q	0.2	0.01	1000000	3
IndivQLearningVarNearbyObs1/794_79_4	centralized	True	-10	False	GridWorld	ISR	FullObsDiscrete	Individual_Q	0.2	0.01	1000000	4
IndivQLearningVarNearbyObs1/795_79_5	centralized	True	-10	False	GridWorld	ISR	FullObsDiscrete	Individual_Q	0.2	0.01	1000000	5
IndivQLearningVarNearbyObs1/796_79_6	centralized	True	-10	False	GridWorld	ISR	FullObsDiscrete	Individual_Q	0.2	0.01	1000000	6
IndivQLearningVarNearbyObs1/797_79_7	centralized	True	-10	False	GridWorld	ISR	FullObsDiscrete	Individual_Q	0.2	0.01	1000000	7
IndivQLearningVarNearbyObs1/798_79_8	centralized	True	-10	False	GridWorld	ISR	FullObsDiscrete	Individual_Q	0.2	0.01	1000000	8
IndivQLearningVarNearbyObs1/799_79_9	centralized	True	-10	False	GridWorld	ISR	FullObsDiscrete	Individual_Q	0.2	0.01	1000000	9
IndivQLearningVarNearbyObs1/800_80_0	decentralized	True	0	False	GridWorld	ISR	NearbyObsDiscrete	Individual_Q	0.2	0.2	1000000	0
IndivQLearningVarNearbyObs1/801_80_1	decentralized	True	0	False	GridWorld	ISR	NearbyObsDiscrete	Individual_Q	0.2	0.2	1000000	1
IndivQLearningVarNearbyObs1/802_80_2	decentralized	True	0	False	GridWorld	ISR	NearbyObsDiscrete	Individual_Q	0.2	0.2	1000000	2
IndivQLearningVarNearbyObs1/803_80_3	decentralized	True	0	False	GridWorld	ISR	NearbyObsDiscrete	Individual_Q	0.2	0.2	1000000	3
IndivQLearningVarNearbyObs1/804_80_4	decentralized	True	0	False	GridWorld	ISR	NearbyObsDiscrete	Individual_Q	0.2	0.2	1000000	4
IndivQLearningVarNearbyObs1/805_80_5	decentralized	True	0	False	GridWorld	ISR	NearbyObsDiscrete	Individual_Q	0.2	0.2	1000000	5
IndivQLearningVarNearbyObs1/806_80_6	decentralized	True	0	False	GridWorld	ISR	NearbyObsDiscrete	Individual_Q	0.2	0.2	1000000	6
IndivQLearningVarNearbyObs1/807_80_7	decentralized	True	0	False	GridWorld	ISR	NearbyObsDiscrete	Individual_Q	0.2	0.2	1000000	7
IndivQLearningVarNearbyObs1/808_80_8	decentralized	True	0	False	GridWorld	ISR	NearbyObsDiscrete	Individual_Q	0.2	0.2	1000000	8
IndivQLearningVarNearbyObs1/809_80_9	decentralized	True	0	False	GridWorld	ISR	NearbyObsDiscrete	Individual_Q	0.2	0.2	1000000	9
IndivQLearningVarNearbyObs1/810_81_0	decentralized	True	-10	False	GridWorld	ISR	NearbyObsDiscrete	Individual_Q	0.2	0.2	1000000	0
IndivQLearningVarNearbyObs1/811_81_1	decentralized	True	-10	False	GridWorld	ISR	NearbyObsDiscrete	Individual_Q	0.2	0.2	1000000	1
IndivQLearningVarNearbyObs1/812_81_2	decentralized	True	-10	False	GridWorld	ISR	NearbyObsDiscrete	Individual_Q	0.2	0.2	1000000	2
IndivQLearningVarNearbyObs1/813_81_3	decentralized	True	-10	False	GridWorld	ISR	NearbyObsDiscrete	Individual_Q	0.2	0.2	1000000	3
IndivQLearningVarNearbyObs1/814_81_4	decentralized	True	-10	False	GridWorld	ISR	NearbyObsDiscrete	Individual_Q	0.2	0.2	1000000	4
IndivQLearningVarNearbyObs1/815_81_5	decentralized	True	-10	False	GridWorld	ISR	NearbyObsDiscrete	Individual_Q	0.2	0.2	1000000	5
IndivQLearningVarNearbyObs1/816_81_6	decentralized	True	-10	False	GridWorld	ISR	NearbyObsDiscrete	Individual_Q	0.2	0.2	1000000	6
IndivQLearningVarNearbyObs1/817_81_7	decentralized	True	-10	False	GridWorld	ISR	NearbyObsDiscrete	Individual_Q	0.2	0.2	1000000	7
IndivQLearningVarNearbyObs1/818_81_8	decentralized	True	-10	False	GridWorld	ISR	NearbyObsDiscrete	Individual_Q	0.2	0.2	1000000	8
IndivQLearningVarNearbyObs1/819_81_9	decentralized	True	-10	False	GridWorld	ISR	NearbyObsDiscrete	Individual_Q	0.2	0.2	1000000	9
IndivQLearningVarNearbyObs1/820_82_0	decentralized	True	0	False	GridWorld	ISR	NearbyObsDiscrete	Individual_Q	0.2	0.01	1000000	0
IndivQLearningVarNearbyObs1/821_82_1	decentralized	True	0	False	GridWorld	ISR	NearbyObsDiscrete	Individual_Q	0.2	0.01	1000000	1
IndivQLearningVarNearbyObs1/822_82_2	decentralized	True	0	False	GridWorld	ISR	NearbyObsDiscrete	Individual_Q	0.2	0.01	1000000	2
IndivQLearningVarNearbyObs1/823_82_3	decentralized	True	0	False	GridWorld	ISR	NearbyObsDiscrete	Individual_Q	0.2	0.01	1000000	3
IndivQLearningVarNearbyObs1/824_82_4	decentralized	True	0	False	GridWorld	ISR	NearbyObsDiscrete	Individual_Q	0.2	0.01	1000000	4
IndivQLearningVarNearbyObs1/825_82_5	decentralized	True	0	False	GridWorld	ISR	NearbyObsDiscrete	Individual_Q	0.2	0.01	1000000	5
IndivQLearningVarNearbyObs1/826_82_6	decentralized	True	0	False	GridWorld	ISR	NearbyObsDiscrete	Individual_Q	0.2	0.01	1000000	6
IndivQLearningVarNearbyObs1/827_82_7	decentralized	True	0	False	GridWorld	ISR	NearbyObsDiscrete	Individual_Q	0.2	0.01	1000000	7
IndivQLearningVarNearbyObs1/828_82_8	decentralized	True	0	False	GridWorld	ISR	NearbyObsDiscrete	Individual_Q	0.2	0.01	1000000	8
IndivQLearningVarNearbyObs1/829_82_9	decentralized	True	0	False	GridWorld	ISR	NearbyObsDiscrete	Individual_Q	0.2	0.01	1000000	9
IndivQLearningVarNearbyObs1/830_83_0	decentralized	True	-10	False	GridWorld	ISR	NearbyObsDiscrete	Individual_Q	0.2	0.01	1000000	0
IndivQLearningVarNearbyObs1/831_83_1	decentralized	True	-10	False	GridWorld	ISR	NearbyObsDiscrete	Individual_Q	0.2	0.01	1000000	1
IndivQLearningVarNearbyObs1/832_83_2	decentralized	True	-10	False	GridWorld	ISR	NearbyObsDiscrete	Individual_Q	0.2	0.01	1000000	2
IndivQLearningVarNearbyObs1/833_83_3	decentralized	True	-10	False	GridWorld	ISR	NearbyObsDiscrete	Individual_Q	0.2	0.01	1000000	3
IndivQLearningVarNearbyObs1/834_83_4	decentralized	True	-10	False	GridWorld	ISR	NearbyObsDiscrete	Individual_Q	0.2	0.01	1000000	4
IndivQLearningVarNearbyObs1/835_83_5	decentralized	True	-10	False	GridWorld	ISR	NearbyObsDiscrete	Individual_Q	0.2	0.01	1000000	5
IndivQLearningVarNearbyObs1/836_83_6	decentralized	True	-10	False	GridWorld	ISR	NearbyObsDiscrete	Individual_Q	0.2	0.01	1000000	6
IndivQLearningVarNearbyObs1/837_83_7	decentralized	True	-10	False	GridWorld	ISR	NearbyObsDiscrete	Individual_Q	0.2	0.01	1000000	7
IndivQLearningVarNearbyObs1/838_83_8	decentralized	True	-10	False	GridWorld	ISR	NearbyObsDiscrete	Individual_Q	0.2	0.01	1000000	8
IndivQLearningVarNearbyObs1/839_83_9	decentralized	True	-10	False	GridWorld	ISR	NearbyObsDiscrete	Individual_Q	0.2	0.01	1000000	9
IndivQLearningVarNearbyObs1/840_84_0	decentralized	True	0	False	GridWorld	ISR	FullObsDiscrete	Individual_Q	0.2	0.2	1000000	0
IndivQLearningVarNearbyObs1/841_84_1	decentralized	True	0	False	GridWorld	ISR	FullObsDiscrete	Individual_Q	0.2	0.2	1000000	1
IndivQLearningVarNearbyObs1/842_84_2	decentralized	True	0	False	GridWorld	ISR	FullObsDiscrete	Individual_Q	0.2	0.2	1000000	2
IndivQLearningVarNearbyObs1/843_84_3	decentralized	True	0	False	GridWorld	ISR	FullObsDiscrete	Individual_Q	0.2	0.2	1000000	3
IndivQLearningVarNearbyObs1/844_84_4	decentralized	True	0	False	GridWorld	ISR	FullObsDiscrete	Individual_Q	0.2	0.2	1000000	4
IndivQLearningVarNearbyObs1/845_84_5	decentralized	True	0	False	GridWorld	ISR	FullObsDiscrete	Individual_Q	0.2	0.2	1000000	5
IndivQLearningVarNearbyObs1/846_84_6	decentralized	True	0	False	GridWorld	ISR	FullObsDiscrete	Individual_Q	0.2	0.2	1000000	6
IndivQLearningVarNearbyObs1/847_84_7	decentralized	True	0	False	GridWorld	ISR	FullObsDiscrete	Individual_Q	0.2	0.2	1000000	7
IndivQLearningVarNearbyObs1/848_84_8	decentralized	True	0	False	GridWorld	ISR	FullObsDiscrete	Individual_Q	0.2	0.2	1000000	8
IndivQLearningVarNearbyObs1/849_84_9	decentralized	True	0	False	GridWorld	ISR	FullObsDiscrete	Individual_Q	0.2	0.2	1000000	9
IndivQLearningVarNearbyObs1/850_85_0	decentralized	True	-10	False	GridWorld	ISR	FullObsDiscrete	Individual_Q	0.2	0.2	1000000	0
IndivQLearningVarNearbyObs1/851_85_1	decentralized	True	-10	False	GridWorld	ISR	FullObsDiscrete	Individual_Q	0.2	0.2	1000000	1
IndivQLearningVarNearbyObs1/852_85_2	decentralized	True	-10	False	GridWorld	ISR	FullObsDiscrete	Individual_Q	0.2	0.2	1000000	2
IndivQLearningVarNearbyObs1/853_85_3	decentralized	True	-10	False	GridWorld	ISR	FullObsDiscrete	Individual_Q	0.2	0.2	1000000	3
IndivQLearningVarNearbyObs1/854_85_4	decentralized	True	-10	False	GridWorld	ISR	FullObsDiscrete	Individual_Q	0.2	0.2	1000000	4
IndivQLearningVarNearbyObs1/855_85_5	decentralized	True	-10	False	GridWorld	ISR	FullObsDiscrete	Individual_Q	0.2	0.2	1000000	5
IndivQLearningVarNearbyObs1/856_85_6	decentralized	True	-10	False	GridWorld	ISR	FullObsDiscrete	Individual_Q	0.2	0.2	1000000	6
IndivQLearningVarNearbyObs1/857_85_7	decentralized	True	-10	False	GridWorld	ISR	FullObsDiscrete	Individual_Q	0.2	0.2	1000000	7
IndivQLearningVarNearbyObs1/858_85_8	decentralized	True	-10	False	GridWorld	ISR	FullObsDiscrete	Individual_Q	0.2	0.2	1000000	8
IndivQLearningVarNearbyObs1/859_85_9	decentralized	True	-10	False	GridWorld	ISR	FullObsDiscrete	Individual_Q	0.2	0.2	1000000	9
IndivQLearningVarNearbyObs1/860_86_0	decentralized	True	0	False	GridWorld	ISR	FullObsDiscrete	Individual_Q	0.2	0.01	1000000	0
IndivQLearningVarNearbyObs1/861_86_1	decentralized	True	0	False	GridWorld	ISR	FullObsDiscrete	Individual_Q	0.2	0.01	1000000	1
IndivQLearningVarNearbyObs1/862_86_2	decentralized	True	0	False	GridWorld	ISR	FullObsDiscrete	Individual_Q	0.2	0.01	1000000	2
IndivQLearningVarNearbyObs1/863_86_3	decentralized	True	0	False	GridWorld	ISR	FullObsDiscrete	Individual_Q	0.2	0.01	1000000	3
IndivQLearningVarNearbyObs1/864_86_4	decentralized	True	0	False	GridWorld	ISR	FullObsDiscrete	Individual_Q	0.2	0.01	1000000	4
IndivQLearningVarNearbyObs1/865_86_5	decentralized	True	0	False	GridWorld	ISR	FullObsDiscrete	Individual_Q	0.2	0.01	1000000	5
IndivQLearningVarNearbyObs1/866_86_6	decentralized	True	0	False	GridWorld	ISR	FullObsDiscrete	Individual_Q	0.2	0.01	1000000	6
IndivQLearningVarNearbyObs1/867_86_7	decentralized	True	0	False	GridWorld	ISR	FullObsDiscrete	Individual_Q	0.2	0.01	1000000	7
IndivQLearningVarNearbyObs1/868_86_8	decentralized	True	0	False	GridWorld	ISR	FullObsDiscrete	Individual_Q	0.2	0.01	1000000	8
IndivQLearningVarNearbyObs1/869_86_9	decentralized	True	0	False	GridWorld	ISR	FullObsDiscrete	Individual_Q	0.2	0.01	1000000	9
IndivQLearningVarNearbyObs1/870_87_0	decentralized	True	-10	False	GridWorld	ISR	FullObsDiscrete	Individual_Q	0.2	0.01	1000000	0
IndivQLearningVarNearbyObs1/871_87_1	decentralized	True	-10	False	GridWorld	ISR	FullObsDiscrete	Individual_Q	0.2	0.01	1000000	1
IndivQLearningVarNearbyObs1/872_87_2	decentralized	True	-10	False	GridWorld	ISR	FullObsDiscrete	Individual_Q	0.2	0.01	1000000	2
IndivQLearningVarNearbyObs1/873_87_3	decentralized	True	-10	False	GridWorld	ISR	FullObsDiscrete	Individual_Q	0.2	0.01	1000000	3
IndivQLearningVarNearbyObs1/874_87_4	decentralized	True	-10	False	GridWorld	ISR	FullObsDiscrete	Individual_Q	0.2	0.01	1000000	4
IndivQLearningVarNearbyObs1/875_87_5	decentralized	True	-10	False	GridWorld	ISR	FullObsDiscrete	Individual_Q	0.2	0.01	1000000	5
IndivQLearningVarNearbyObs1/876_87_6	decentralized	True	-10	False	GridWorld	ISR	FullObsDiscrete	Individual_Q	0.2	0.01	1000000	6
IndivQLearningVarNearbyObs1/877_87_7	decentralized	True	-10	False	GridWorld	ISR	FullObsDiscrete	Individual_Q	0.2	0.01	1000000	7
IndivQLearningVarNearbyObs1/878_87_8	decentralized	True	-10	False	GridWorld	ISR	FullObsDiscrete	Individual_Q	0.2	0.01	1000000	8
IndivQLearningVarNearbyObs1/879_87_9	decentralized	True	-10	False	GridWorld	ISR	FullObsDiscrete	Individual_Q	0.2	0.01	1000000	9
IndivQLearningVarNearbyObs1/880_88_0	none	True	0	False	GridWorld	ISR	NearbyObsDiscrete	Individual_Q	0.2	0.2	1000000	0
IndivQLearningVarNearbyObs1/881_88_1	none	True	0	False	GridWorld	ISR	NearbyObsDiscrete	Individual_Q	0.2	0.2	1000000	1
IndivQLearningVarNearbyObs1/882_88_2	none	True	0	False	GridWorld	ISR	NearbyObsDiscrete	Individual_Q	0.2	0.2	1000000	2
IndivQLearningVarNearbyObs1/883_88_3	none	True	0	False	GridWorld	ISR	NearbyObsDiscrete	Individual_Q	0.2	0.2	1000000	3
IndivQLearningVarNearbyObs1/884_88_4	none	True	0	False	GridWorld	ISR	NearbyObsDiscrete	Individual_Q	0.2	0.2	1000000	4
IndivQLearningVarNearbyObs1/885_88_5	none	True	0	False	GridWorld	ISR	NearbyObsDiscrete	Individual_Q	0.2	0.2	1000000	5
IndivQLearningVarNearbyObs1/886_88_6	none	True	0	False	GridWorld	ISR	NearbyObsDiscrete	Individual_Q	0.2	0.2	1000000	6
IndivQLearningVarNearbyObs1/887_88_7	none	True	0	False	GridWorld	ISR	NearbyObsDiscrete	Individual_Q	0.2	0.2	1000000	7
IndivQLearningVarNearbyObs1/888_88_8	none	True	0	False	GridWorld	ISR	NearbyObsDiscrete	Individual_Q	0.2	0.2	1000000	8
IndivQLearningVarNearbyObs1/889_88_9	none	True	0	False	GridWorld	ISR	NearbyObsDiscrete	Individual_Q	0.2	0.2	1000000	9
IndivQLearningVarNearbyObs1/890_89_0	none	True	-10	False	GridWorld	ISR	NearbyObsDiscrete	Individual_Q	0.2	0.2	1000000	0
IndivQLearningVarNearbyObs1/891_89_1	none	True	-10	False	GridWorld	ISR	NearbyObsDiscrete	Individual_Q	0.2	0.2	1000000	1
IndivQLearningVarNearbyObs1/892_89_2	none	True	-10	False	GridWorld	ISR	NearbyObsDiscrete	Individual_Q	0.2	0.2	1000000	2
IndivQLearningVarNearbyObs1/893_89_3	none	True	-10	False	GridWorld	ISR	NearbyObsDiscrete	Individual_Q	0.2	0.2	1000000	3
IndivQLearningVarNearbyObs1/894_89_4	none	True	-10	False	GridWorld	ISR	NearbyObsDiscrete	Individual_Q	0.2	0.2	1000000	4
IndivQLearningVarNearbyObs1/895_89_5	none	True	-10	False	GridWorld	ISR	NearbyObsDiscrete	Individual_Q	0.2	0.2	1000000	5
IndivQLearningVarNearbyObs1/896_89_6	none	True	-10	False	GridWorld	ISR	NearbyObsDiscrete	Individual_Q	0.2	0.2	1000000	6
IndivQLearningVarNearbyObs1/897_89_7	none	True	-10	False	GridWorld	ISR	NearbyObsDiscrete	Individual_Q	0.2	0.2	1000000	7
IndivQLearningVarNearbyObs1/898_89_8	none	True	-10	False	GridWorld	ISR	NearbyObsDiscrete	Individual_Q	0.2	0.2	1000000	8
IndivQLearningVarNearbyObs1/899_89_9	none	True	-10	False	GridWorld	ISR	NearbyObsDiscrete	Individual_Q	0.2	0.2	1000000	9
IndivQLearningVarNearbyObs1/900_90_0	none	True	0	False	GridWorld	ISR	NearbyObsDiscrete	Individual_Q	0.2	0.01	1000000	0
IndivQLearningVarNearbyObs1/901_90_1	none	True	0	False	GridWorld	ISR	NearbyObsDiscrete	Individual_Q	0.2	0.01	1000000	1
IndivQLearningVarNearbyObs1/902_90_2	none	True	0	False	GridWorld	ISR	NearbyObsDiscrete	Individual_Q	0.2	0.01	1000000	2
IndivQLearningVarNearbyObs1/903_90_3	none	True	0	False	GridWorld	ISR	NearbyObsDiscrete	Individual_Q	0.2	0.01	1000000	3
IndivQLearningVarNearbyObs1/904_90_4	none	True	0	False	GridWorld	ISR	NearbyObsDiscrete	Individual_Q	0.2	0.01	1000000	4
IndivQLearningVarNearbyObs1/905_90_5	none	True	0	False	GridWorld	ISR	NearbyObsDiscrete	Individual_Q	0.2	0.01	1000000	5
IndivQLearningVarNearbyObs1/906_90_6	none	True	0	False	GridWorld	ISR	NearbyObsDiscrete	Individual_Q	0.2	0.01	1000000	6
IndivQLearningVarNearbyObs1/907_90_7	none	True	0	False	GridWorld	ISR	NearbyObsDiscrete	Individual_Q	0.2	0.01	1000000	7
IndivQLearningVarNearbyObs1/908_90_8	none	True	0	False	GridWorld	ISR	NearbyObsDiscrete	Individual_Q	0.2	0.01	1000000	8
IndivQLearningVarNearbyObs1/909_90_9	none	True	0	False	GridWorld	ISR	NearbyObsDiscrete	Individual_Q	0.2	0.01	1000000	9
IndivQLearningVarNearbyObs1/910_91_0	none	True	-10	False	GridWorld	ISR	NearbyObsDiscrete	Individual_Q	0.2	0.01	1000000	0
IndivQLearningVarNearbyObs1/911_91_1	none	True	-10	False	GridWorld	ISR	NearbyObsDiscrete	Individual_Q	0.2	0.01	1000000	1
IndivQLearningVarNearbyObs1/912_91_2	none	True	-10	False	GridWorld	ISR	NearbyObsDiscrete	Individual_Q	0.2	0.01	1000000	2
IndivQLearningVarNearbyObs1/913_91_3	none	True	-10	False	GridWorld	ISR	NearbyObsDiscrete	Individual_Q	0.2	0.01	1000000	3
IndivQLearningVarNearbyObs1/914_91_4	none	True	-10	False	GridWorld	ISR	NearbyObsDiscrete	Individual_Q	0.2	0.01	1000000	4
IndivQLearningVarNearbyObs1/915_91_5	none	True	-10	False	GridWorld	ISR	NearbyObsDiscrete	Individual_Q	0.2	0.01	1000000	5
IndivQLearningVarNearbyObs1/916_91_6	none	True	-10	False	GridWorld	ISR	NearbyObsDiscrete	Individual_Q	0.2	0.01	1000000	6
IndivQLearningVarNearbyObs1/917_91_7	none	True	-10	False	GridWorld	ISR	NearbyObsDiscrete	Individual_Q	0.2	0.01	1000000	7
IndivQLearningVarNearbyObs1/918_91_8	none	True	-10	False	GridWorld	ISR	NearbyObsDiscrete	Individual_Q	0.2	0.01	1000000	8
IndivQLearningVarNearbyObs1/919_91_9	none	True	-10	False	GridWorld	ISR	NearbyObsDiscrete	Individual_Q	0.2	0.01	1000000	9
IndivQLearningVarNearbyObs1/920_92_0	none	True	0	False	GridWorld	ISR	FullObsDiscrete	Individual_Q	0.2	0.2	1000000	0
IndivQLearningVarNearbyObs1/921_92_1	none	True	0	False	GridWorld	ISR	FullObsDiscrete	Individual_Q	0.2	0.2	1000000	1
IndivQLearningVarNearbyObs1/922_92_2	none	True	0	False	GridWorld	ISR	FullObsDiscrete	Individual_Q	0.2	0.2	1000000	2
IndivQLearningVarNearbyObs1/923_92_3	none	True	0	False	GridWorld	ISR	FullObsDiscrete	Individual_Q	0.2	0.2	1000000	3
IndivQLearningVarNearbyObs1/924_92_4	none	True	0	False	GridWorld	ISR	FullObsDiscrete	Individual_Q	0.2	0.2	1000000	4
IndivQLearningVarNearbyObs1/925_92_5	none	True	0	False	GridWorld	ISR	FullObsDiscrete	Individual_Q	0.2	0.2	1000000	5
IndivQLearningVarNearbyObs1/926_92_6	none	True	0	False	GridWorld	ISR	FullObsDiscrete	Individual_Q	0.2	0.2	1000000	6
IndivQLearningVarNearbyObs1/927_92_7	none	True	0	False	GridWorld	ISR	FullObsDiscrete	Individual_Q	0.2	0.2	1000000	7
IndivQLearningVarNearbyObs1/928_92_8	none	True	0	False	GridWorld	ISR	FullObsDiscrete	Individual_Q	0.2	0.2	1000000	8
IndivQLearningVarNearbyObs1/929_92_9	none	True	0	False	GridWorld	ISR	FullObsDiscrete	Individual_Q	0.2	0.2	1000000	9
IndivQLearningVarNearbyObs1/930_93_0	none	True	-10	False	GridWorld	ISR	FullObsDiscrete	Individual_Q	0.2	0.2	1000000	0
IndivQLearningVarNearbyObs1/931_93_1	none	True	-10	False	GridWorld	ISR	FullObsDiscrete	Individual_Q	0.2	0.2	1000000	1
IndivQLearningVarNearbyObs1/932_93_2	none	True	-10	False	GridWorld	ISR	FullObsDiscrete	Individual_Q	0.2	0.2	1000000	2
IndivQLearningVarNearbyObs1/933_93_3	none	True	-10	False	GridWorld	ISR	FullObsDiscrete	Individual_Q	0.2	0.2	1000000	3
IndivQLearningVarNearbyObs1/934_93_4	none	True	-10	False	GridWorld	ISR	FullObsDiscrete	Individual_Q	0.2	0.2	1000000	4
IndivQLearningVarNearbyObs1/935_93_5	none	True	-10	False	GridWorld	ISR	FullObsDiscrete	Individual_Q	0.2	0.2	1000000	5
IndivQLearningVarNearbyObs1/936_93_6	none	True	-10	False	GridWorld	ISR	FullObsDiscrete	Individual_Q	0.2	0.2	1000000	6
IndivQLearningVarNearbyObs1/937_93_7	none	True	-10	False	GridWorld	ISR	FullObsDiscrete	Individual_Q	0.2	0.2	1000000	7
IndivQLearningVarNearbyObs1/938_93_8	none	True	-10	False	GridWorld	ISR	FullObsDiscrete	Individual_Q	0.2	0.2	1000000	8
IndivQLearningVarNearbyObs1/939_93_9	none	True	-10	False	GridWorld	ISR	FullObsDiscrete	Individual_Q	0.2	0.2	1000000	9
IndivQLearningVarNearbyObs1/940_94_0	none	True	0	False	GridWorld	ISR	FullObsDiscrete	Individual_Q	0.2	0.01	1000000	0
IndivQLearningVarNearbyObs1/941_94_1	none	True	0	False	GridWorld	ISR	FullObsDiscrete	Individual_Q	0.2	0.01	1000000	1
IndivQLearningVarNearbyObs1/942_94_2	none	True	0	False	GridWorld	ISR	FullObsDiscrete	Individual_Q	0.2	0.01	1000000	2
IndivQLearningVarNearbyObs1/943_94_3	none	True	0	False	GridWorld	ISR	FullObsDiscrete	Individual_Q	0.2	0.01	1000000	3
IndivQLearningVarNearbyObs1/944_94_4	none	True	0	False	GridWorld	ISR	FullObsDiscrete	Individual_Q	0.2	0.01	1000000	4
IndivQLearningVarNearbyObs1/945_94_5	none	True	0	False	GridWorld	ISR	FullObsDiscrete	Individual_Q	0.2	0.01	1000000	5
IndivQLearningVarNearbyObs1/946_94_6	none	True	0	False	GridWorld	ISR	FullObsDiscrete	Individual_Q	0.2	0.01	1000000	6
IndivQLearningVarNearbyObs1/947_94_7	none	True	0	False	GridWorld	ISR	FullObsDiscrete	Individual_Q	0.2	0.01	1000000	7
IndivQLearningVarNearbyObs1/948_94_8	none	True	0	False	GridWorld	ISR	FullObsDiscrete	Individual_Q	0.2	0.01	1000000	8
IndivQLearningVarNearbyObs1/949_94_9	none	True	0	False	GridWorld	ISR	FullObsDiscrete	Individual_Q	0.2	0.01	1000000	9
IndivQLearningVarNearbyObs1/950_95_0	none	True	-10	False	GridWorld	ISR	FullObsDiscrete	Individual_Q	0.2	0.01	1000000	0
IndivQLearningVarNearbyObs1/951_95_1	none	True	-10	False	GridWorld	ISR	FullObsDiscrete	Individual_Q	0.2	0.01	1000000	1
IndivQLearningVarNearbyObs1/952_95_2	none	True	-10	False	GridWorld	ISR	FullObsDiscrete	Individual_Q	0.2	0.01	1000000	2
IndivQLearningVarNearbyObs1/953_95_3	none	True	-10	False	GridWorld	ISR	FullObsDiscrete	Individual_Q	0.2	0.01	1000000	3
IndivQLearningVarNearbyObs1/954_95_4	none	True	-10	False	GridWorld	ISR	FullObsDiscrete	Individual_Q	0.2	0.01	1000000	4
IndivQLearningVarNearbyObs1/955_95_5	none	True	-10	False	GridWorld	ISR	FullObsDiscrete	Individual_Q	0.2	0.01	1000000	5
IndivQLearningVarNearbyObs1/956_95_6	none	True	-10	False	GridWorld	ISR	FullObsDiscrete	Individual_Q	0.2	0.01	1000000	6
IndivQLearningVarNearbyObs1/957_95_7	none	True	-10	False	GridWorld	ISR	FullObsDiscrete	Individual_Q	0.2	0.01	1000000	7
IndivQLearningVarNearbyObs1/958_95_8	none	True	-10	False	GridWorld	ISR	FullObsDiscrete	Individual_Q	0.2	0.01	1000000	8
IndivQLearningVarNearbyObs1/959_95_9	none	True	-10	False	GridWorld	ISR	FullObsDiscrete	Individual_Q	0.2	0.01	1000000	9
IndivQLearningVarNearbyObs1/960_96_0	centralized	True	0	True	GridWorld	SUNY	NearbyObsDiscrete	Individual_Q	0.2	0.2	1000000	0
IndivQLearningVarNearbyObs1/961_96_1	centralized	True	0	True	GridWorld	SUNY	NearbyObsDiscrete	Individual_Q	0.2	0.2	1000000	1
IndivQLearningVarNearbyObs1/962_96_2	centralized	True	0	True	GridWorld	SUNY	NearbyObsDiscrete	Individual_Q	0.2	0.2	1000000	2
IndivQLearningVarNearbyObs1/963_96_3	centralized	True	0	True	GridWorld	SUNY	NearbyObsDiscrete	Individual_Q	0.2	0.2	1000000	3
IndivQLearningVarNearbyObs1/964_96_4	centralized	True	0	True	GridWorld	SUNY	NearbyObsDiscrete	Individual_Q	0.2	0.2	1000000	4
IndivQLearningVarNearbyObs1/965_96_5	centralized	True	0	True	GridWorld	SUNY	NearbyObsDiscrete	Individual_Q	0.2	0.2	1000000	5
IndivQLearningVarNearbyObs1/966_96_6	centralized	True	0	True	GridWorld	SUNY	NearbyObsDiscrete	Individual_Q	0.2	0.2	1000000	6
IndivQLearningVarNearbyObs1/967_96_7	centralized	True	0	True	GridWorld	SUNY	NearbyObsDiscrete	Individual_Q	0.2	0.2	1000000	7
IndivQLearningVarNearbyObs1/968_96_8	centralized	True	0	True	GridWorld	SUNY	NearbyObsDiscrete	Individual_Q	0.2	0.2	1000000	8
IndivQLearningVarNearbyObs1/969_96_9	centralized	True	0	True	GridWorld	SUNY	NearbyObsDiscrete	Individual_Q	0.2	0.2	1000000	9
IndivQLearningVarNearbyObs1/970_97_0	centralized	True	-10	True	GridWorld	SUNY	NearbyObsDiscrete	Individual_Q	0.2	0.2	1000000	0
IndivQLearningVarNearbyObs1/971_97_1	centralized	True	-10	True	GridWorld	SUNY	NearbyObsDiscrete	Individual_Q	0.2	0.2	1000000	1
IndivQLearningVarNearbyObs1/972_97_2	centralized	True	-10	True	GridWorld	SUNY	NearbyObsDiscrete	Individual_Q	0.2	0.2	1000000	2
IndivQLearningVarNearbyObs1/973_97_3	centralized	True	-10	True	GridWorld	SUNY	NearbyObsDiscrete	Individual_Q	0.2	0.2	1000000	3
IndivQLearningVarNearbyObs1/974_97_4	centralized	True	-10	True	GridWorld	SUNY	NearbyObsDiscrete	Individual_Q	0.2	0.2	1000000	4
IndivQLearningVarNearbyObs1/975_97_5	centralized	True	-10	True	GridWorld	SUNY	NearbyObsDiscrete	Individual_Q	0.2	0.2	1000000	5
IndivQLearningVarNearbyObs1/976_97_6	centralized	True	-10	True	GridWorld	SUNY	NearbyObsDiscrete	Individual_Q	0.2	0.2	1000000	6
IndivQLearningVarNearbyObs1/977_97_7	centralized	True	-10	True	GridWorld	SUNY	NearbyObsDiscrete	Individual_Q	0.2	0.2	1000000	7
IndivQLearningVarNearbyObs1/978_97_8	centralized	True	-10	True	GridWorld	SUNY	NearbyObsDiscrete	Individual_Q	0.2	0.2	1000000	8
IndivQLearningVarNearbyObs1/979_97_9	centralized	True	-10	True	GridWorld	SUNY	NearbyObsDiscrete	Individual_Q	0.2	0.2	1000000	9
IndivQLearningVarNearbyObs1/980_98_0	centralized	True	0	True	GridWorld	SUNY	NearbyObsDiscrete	Individual_Q	0.2	0.01	1000000	0
IndivQLearningVarNearbyObs1/981_98_1	centralized	True	0	True	GridWorld	SUNY	NearbyObsDiscrete	Individual_Q	0.2	0.01	1000000	1
IndivQLearningVarNearbyObs1/982_98_2	centralized	True	0	True	GridWorld	SUNY	NearbyObsDiscrete	Individual_Q	0.2	0.01	1000000	2
IndivQLearningVarNearbyObs1/983_98_3	centralized	True	0	True	GridWorld	SUNY	NearbyObsDiscrete	Individual_Q	0.2	0.01	1000000	3
IndivQLearningVarNearbyObs1/984_98_4	centralized	True	0	True	GridWorld	SUNY	NearbyObsDiscrete	Individual_Q	0.2	0.01	1000000	4
IndivQLearningVarNearbyObs1/985_98_5	centralized	True	0	True	GridWorld	SUNY	NearbyObsDiscrete	Individual_Q	0.2	0.01	1000000	5
IndivQLearningVarNearbyObs1/986_98_6	centralized	True	0	True	GridWorld	SUNY	NearbyObsDiscrete	Individual_Q	0.2	0.01	1000000	6
IndivQLearningVarNearbyObs1/987_98_7	centralized	True	0	True	GridWorld	SUNY	NearbyObsDiscrete	Individual_Q	0.2	0.01	1000000	7
IndivQLearningVarNearbyObs1/988_98_8	centralized	True	0	True	GridWorld	SUNY	NearbyObsDiscrete	Individual_Q	0.2	0.01	1000000	8
IndivQLearningVarNearbyObs1/989_98_9	centralized	True	0	True	GridWorld	SUNY	NearbyObsDiscrete	Individual_Q	0.2	0.01	1000000	9
IndivQLearningVarNearbyObs1/990_99_0	centralized	True	-10	True	GridWorld	SUNY	NearbyObsDiscrete	Individual_Q	0.2	0.01	1000000	0
IndivQLearningVarNearbyObs1/991_99_1	centralized	True	-10	True	GridWorld	SUNY	NearbyObsDiscrete	Individual_Q	0.2	0.01	1000000	1
IndivQLearningVarNearbyObs1/992_99_2	centralized	True	-10	True	GridWorld	SUNY	NearbyObsDiscrete	Individual_Q	0.2	0.01	1000000	2
IndivQLearningVarNearbyObs1/993_99_3	centralized	True	-10	True	GridWorld	SUNY	NearbyObsDiscrete	Individual_Q	0.2	0.01	1000000	3
IndivQLearningVarNearbyObs1/994_99_4	centralized	True	-10	True	GridWorld	SUNY	NearbyObsDiscrete	Individual_Q	0.2	0.01	1000000	4
IndivQLearningVarNearbyObs1/995_99_5	centralized	True	-10	True	GridWorld	SUNY	NearbyObsDiscrete	Individual_Q	0.2	0.01	1000000	5
IndivQLearningVarNearbyObs1/996_99_6	centralized	True	-10	True	GridWorld	SUNY	NearbyObsDiscrete	Individual_Q	0.2	0.01	1000000	6
IndivQLearningVarNearbyObs1/997_99_7	centralized	True	-10	True	GridWorld	SUNY	NearbyObsDiscrete	Individual_Q	0.2	0.01	1000000	7
IndivQLearningVarNearbyObs1/998_99_8	centralized	True	-10	True	GridWorld	SUNY	NearbyObsDiscrete	Individual_Q	0.2	0.01	1000000	8
IndivQLearningVarNearbyObs1/999_99_9	centralized	True	-10	True	GridWorld	SUNY	NearbyObsDiscrete	Individual_Q	0.2	0.01	1000000	9
IndivQLearningVarNearbyObs1/1000_100_0	centralized	True	0	True	GridWorld	SUNY	FullObsDiscrete	Individual_Q	0.2	0.2	1000000	0
IndivQLearningVarNearbyObs1/1001_100_1	centralized	True	0	True	GridWorld	SUNY	FullObsDiscrete	Individual_Q	0.2	0.2	1000000	1
IndivQLearningVarNearbyObs1/1002_100_2	centralized	True	0	True	GridWorld	SUNY	FullObsDiscrete	Individual_Q	0.2	0.2	1000000	2
IndivQLearningVarNearbyObs1/1003_100_3	centralized	True	0	True	GridWorld	SUNY	FullObsDiscrete	Individual_Q	0.2	0.2	1000000	3
IndivQLearningVarNearbyObs1/1004_100_4	centralized	True	0	True	GridWorld	SUNY	FullObsDiscrete	Individual_Q	0.2	0.2	1000000	4
IndivQLearningVarNearbyObs1/1005_100_5	centralized	True	0	True	GridWorld	SUNY	FullObsDiscrete	Individual_Q	0.2	0.2	1000000	5
IndivQLearningVarNearbyObs1/1006_100_6	centralized	True	0	True	GridWorld	SUNY	FullObsDiscrete	Individual_Q	0.2	0.2	1000000	6
IndivQLearningVarNearbyObs1/1007_100_7	centralized	True	0	True	GridWorld	SUNY	FullObsDiscrete	Individual_Q	0.2	0.2	1000000	7
IndivQLearningVarNearbyObs1/1008_100_8	centralized	True	0	True	GridWorld	SUNY	FullObsDiscrete	Individual_Q	0.2	0.2	1000000	8
IndivQLearningVarNearbyObs1/1009_100_9	centralized	True	0	True	GridWorld	SUNY	FullObsDiscrete	Individual_Q	0.2	0.2	1000000	9
IndivQLearningVarNearbyObs1/1010_101_0	centralized	True	-10	True	GridWorld	SUNY	FullObsDiscrete	Individual_Q	0.2	0.2	1000000	0
IndivQLearningVarNearbyObs1/1011_101_1	centralized	True	-10	True	GridWorld	SUNY	FullObsDiscrete	Individual_Q	0.2	0.2	1000000	1
IndivQLearningVarNearbyObs1/1012_101_2	centralized	True	-10	True	GridWorld	SUNY	FullObsDiscrete	Individual_Q	0.2	0.2	1000000	2
IndivQLearningVarNearbyObs1/1013_101_3	centralized	True	-10	True	GridWorld	SUNY	FullObsDiscrete	Individual_Q	0.2	0.2	1000000	3
IndivQLearningVarNearbyObs1/1014_101_4	centralized	True	-10	True	GridWorld	SUNY	FullObsDiscrete	Individual_Q	0.2	0.2	1000000	4
IndivQLearningVarNearbyObs1/1015_101_5	centralized	True	-10	True	GridWorld	SUNY	FullObsDiscrete	Individual_Q	0.2	0.2	1000000	5
IndivQLearningVarNearbyObs1/1016_101_6	centralized	True	-10	True	GridWorld	SUNY	FullObsDiscrete	Individual_Q	0.2	0.2	1000000	6
IndivQLearningVarNearbyObs1/1017_101_7	centralized	True	-10	True	GridWorld	SUNY	FullObsDiscrete	Individual_Q	0.2	0.2	1000000	7
IndivQLearningVarNearbyObs1/1018_101_8	centralized	True	-10	True	GridWorld	SUNY	FullObsDiscrete	Individual_Q	0.2	0.2	1000000	8
IndivQLearningVarNearbyObs1/1019_101_9	centralized	True	-10	True	GridWorld	SUNY	FullObsDiscrete	Individual_Q	0.2	0.2	1000000	9
IndivQLearningVarNearbyObs1/1020_102_0	centralized	True	0	True	GridWorld	SUNY	FullObsDiscrete	Individual_Q	0.2	0.01	1000000	0
IndivQLearningVarNearbyObs1/1021_102_1	centralized	True	0	True	GridWorld	SUNY	FullObsDiscrete	Individual_Q	0.2	0.01	1000000	1
IndivQLearningVarNearbyObs1/1022_102_2	centralized	True	0	True	GridWorld	SUNY	FullObsDiscrete	Individual_Q	0.2	0.01	1000000	2
IndivQLearningVarNearbyObs1/1023_102_3	centralized	True	0	True	GridWorld	SUNY	FullObsDiscrete	Individual_Q	0.2	0.01	1000000	3
IndivQLearningVarNearbyObs1/1024_102_4	centralized	True	0	True	GridWorld	SUNY	FullObsDiscrete	Individual_Q	0.2	0.01	1000000	4
IndivQLearningVarNearbyObs1/1025_102_5	centralized	True	0	True	GridWorld	SUNY	FullObsDiscrete	Individual_Q	0.2	0.01	1000000	5
IndivQLearningVarNearbyObs1/1026_102_6	centralized	True	0	True	GridWorld	SUNY	FullObsDiscrete	Individual_Q	0.2	0.01	1000000	6
IndivQLearningVarNearbyObs1/1027_102_7	centralized	True	0	True	GridWorld	SUNY	FullObsDiscrete	Individual_Q	0.2	0.01	1000000	7
IndivQLearningVarNearbyObs1/1028_102_8	centralized	True	0	True	GridWorld	SUNY	FullObsDiscrete	Individual_Q	0.2	0.01	1000000	8
IndivQLearningVarNearbyObs1/1029_102_9	centralized	True	0	True	GridWorld	SUNY	FullObsDiscrete	Individual_Q	0.2	0.01	1000000	9
IndivQLearningVarNearbyObs1/1030_103_0	centralized	True	-10	True	GridWorld	SUNY	FullObsDiscrete	Individual_Q	0.2	0.01	1000000	0
IndivQLearningVarNearbyObs1/1031_103_1	centralized	True	-10	True	GridWorld	SUNY	FullObsDiscrete	Individual_Q	0.2	0.01	1000000	1
IndivQLearningVarNearbyObs1/1032_103_2	centralized	True	-10	True	GridWorld	SUNY	FullObsDiscrete	Individual_Q	0.2	0.01	1000000	2
IndivQLearningVarNearbyObs1/1033_103_3	centralized	True	-10	True	GridWorld	SUNY	FullObsDiscrete	Individual_Q	0.2	0.01	1000000	3
IndivQLearningVarNearbyObs1/1034_103_4	centralized	True	-10	True	GridWorld	SUNY	FullObsDiscrete	Individual_Q	0.2	0.01	1000000	4
IndivQLearningVarNearbyObs1/1035_103_5	centralized	True	-10	True	GridWorld	SUNY	FullObsDiscrete	Individual_Q	0.2	0.01	1000000	5
IndivQLearningVarNearbyObs1/1036_103_6	centralized	True	-10	True	GridWorld	SUNY	FullObsDiscrete	Individual_Q	0.2	0.01	1000000	6
IndivQLearningVarNearbyObs1/1037_103_7	centralized	True	-10	True	GridWorld	SUNY	FullObsDiscrete	Individual_Q	0.2	0.01	1000000	7
IndivQLearningVarNearbyObs1/1038_103_8	centralized	True	-10	True	GridWorld	SUNY	FullObsDiscrete	Individual_Q	0.2	0.01	1000000	8
IndivQLearningVarNearbyObs1/1039_103_9	centralized	True	-10	True	GridWorld	SUNY	FullObsDiscrete	Individual_Q	0.2	0.01	1000000	9
IndivQLearningVarNearbyObs1/1040_104_0	decentralized	True	0	True	GridWorld	SUNY	NearbyObsDiscrete	Individual_Q	0.2	0.2	1000000	0
IndivQLearningVarNearbyObs1/1041_104_1	decentralized	True	0	True	GridWorld	SUNY	NearbyObsDiscrete	Individual_Q	0.2	0.2	1000000	1
IndivQLearningVarNearbyObs1/1042_104_2	decentralized	True	0	True	GridWorld	SUNY	NearbyObsDiscrete	Individual_Q	0.2	0.2	1000000	2
IndivQLearningVarNearbyObs1/1043_104_3	decentralized	True	0	True	GridWorld	SUNY	NearbyObsDiscrete	Individual_Q	0.2	0.2	1000000	3
IndivQLearningVarNearbyObs1/1044_104_4	decentralized	True	0	True	GridWorld	SUNY	NearbyObsDiscrete	Individual_Q	0.2	0.2	1000000	4
IndivQLearningVarNearbyObs1/1045_104_5	decentralized	True	0	True	GridWorld	SUNY	NearbyObsDiscrete	Individual_Q	0.2	0.2	1000000	5
IndivQLearningVarNearbyObs1/1046_104_6	decentralized	True	0	True	GridWorld	SUNY	NearbyObsDiscrete	Individual_Q	0.2	0.2	1000000	6
IndivQLearningVarNearbyObs1/1047_104_7	decentralized	True	0	True	GridWorld	SUNY	NearbyObsDiscrete	Individual_Q	0.2	0.2	1000000	7
IndivQLearningVarNearbyObs1/1048_104_8	decentralized	True	0	True	GridWorld	SUNY	NearbyObsDiscrete	Individual_Q	0.2	0.2	1000000	8
IndivQLearningVarNearbyObs1/1049_104_9	decentralized	True	0	True	GridWorld	SUNY	NearbyObsDiscrete	Individual_Q	0.2	0.2	1000000	9
IndivQLearningVarNearbyObs1/1050_105_0	decentralized	True	-10	True	GridWorld	SUNY	NearbyObsDiscrete	Individual_Q	0.2	0.2	1000000	0
IndivQLearningVarNearbyObs1/1051_105_1	decentralized	True	-10	True	GridWorld	SUNY	NearbyObsDiscrete	Individual_Q	0.2	0.2	1000000	1
IndivQLearningVarNearbyObs1/1052_105_2	decentralized	True	-10	True	GridWorld	SUNY	NearbyObsDiscrete	Individual_Q	0.2	0.2	1000000	2
IndivQLearningVarNearbyObs1/1053_105_3	decentralized	True	-10	True	GridWorld	SUNY	NearbyObsDiscrete	Individual_Q	0.2	0.2	1000000	3
IndivQLearningVarNearbyObs1/1054_105_4	decentralized	True	-10	True	GridWorld	SUNY	NearbyObsDiscrete	Individual_Q	0.2	0.2	1000000	4
IndivQLearningVarNearbyObs1/1055_105_5	decentralized	True	-10	True	GridWorld	SUNY	NearbyObsDiscrete	Individual_Q	0.2	0.2	1000000	5
IndivQLearningVarNearbyObs1/1056_105_6	decentralized	True	-10	True	GridWorld	SUNY	NearbyObsDiscrete	Individual_Q	0.2	0.2	1000000	6
IndivQLearningVarNearbyObs1/1057_105_7	decentralized	True	-10	True	GridWorld	SUNY	NearbyObsDiscrete	Individual_Q	0.2	0.2	1000000	7
IndivQLearningVarNearbyObs1/1058_105_8	decentralized	True	-10	True	GridWorld	SUNY	NearbyObsDiscrete	Individual_Q	0.2	0.2	1000000	8
IndivQLearningVarNearbyObs1/1059_105_9	decentralized	True	-10	True	GridWorld	SUNY	NearbyObsDiscrete	Individual_Q	0.2	0.2	1000000	9
IndivQLearningVarNearbyObs1/1060_106_0	decentralized	True	0	True	GridWorld	SUNY	NearbyObsDiscrete	Individual_Q	0.2	0.01	1000000	0
IndivQLearningVarNearbyObs1/1061_106_1	decentralized	True	0	True	GridWorld	SUNY	NearbyObsDiscrete	Individual_Q	0.2	0.01	1000000	1
IndivQLearningVarNearbyObs1/1062_106_2	decentralized	True	0	True	GridWorld	SUNY	NearbyObsDiscrete	Individual_Q	0.2	0.01	1000000	2
IndivQLearningVarNearbyObs1/1063_106_3	decentralized	True	0	True	GridWorld	SUNY	NearbyObsDiscrete	Individual_Q	0.2	0.01	1000000	3
IndivQLearningVarNearbyObs1/1064_106_4	decentralized	True	0	True	GridWorld	SUNY	NearbyObsDiscrete	Individual_Q	0.2	0.01	1000000	4
IndivQLearningVarNearbyObs1/1065_106_5	decentralized	True	0	True	GridWorld	SUNY	NearbyObsDiscrete	Individual_Q	0.2	0.01	1000000	5
IndivQLearningVarNearbyObs1/1066_106_6	decentralized	True	0	True	GridWorld	SUNY	NearbyObsDiscrete	Individual_Q	0.2	0.01	1000000	6
IndivQLearningVarNearbyObs1/1067_106_7	decentralized	True	0	True	GridWorld	SUNY	NearbyObsDiscrete	Individual_Q	0.2	0.01	1000000	7
IndivQLearningVarNearbyObs1/1068_106_8	decentralized	True	0	True	GridWorld	SUNY	NearbyObsDiscrete	Individual_Q	0.2	0.01	1000000	8
IndivQLearningVarNearbyObs1/1069_106_9	decentralized	True	0	True	GridWorld	SUNY	NearbyObsDiscrete	Individual_Q	0.2	0.01	1000000	9
IndivQLearningVarNearbyObs1/1070_107_0	decentralized	True	-10	True	GridWorld	SUNY	NearbyObsDiscrete	Individual_Q	0.2	0.01	1000000	0
IndivQLearningVarNearbyObs1/1071_107_1	decentralized	True	-10	True	GridWorld	SUNY	NearbyObsDiscrete	Individual_Q	0.2	0.01	1000000	1
IndivQLearningVarNearbyObs1/1072_107_2	decentralized	True	-10	True	GridWorld	SUNY	NearbyObsDiscrete	Individual_Q	0.2	0.01	1000000	2
IndivQLearningVarNearbyObs1/1073_107_3	decentralized	True	-10	True	GridWorld	SUNY	NearbyObsDiscrete	Individual_Q	0.2	0.01	1000000	3
IndivQLearningVarNearbyObs1/1074_107_4	decentralized	True	-10	True	GridWorld	SUNY	NearbyObsDiscrete	Individual_Q	0.2	0.01	1000000	4
IndivQLearningVarNearbyObs1/1075_107_5	decentralized	True	-10	True	GridWorld	SUNY	NearbyObsDiscrete	Individual_Q	0.2	0.01	1000000	5
IndivQLearningVarNearbyObs1/1076_107_6	decentralized	True	-10	True	GridWorld	SUNY	NearbyObsDiscrete	Individual_Q	0.2	0.01	1000000	6
IndivQLearningVarNearbyObs1/1077_107_7	decentralized	True	-10	True	GridWorld	SUNY	NearbyObsDiscrete	Individual_Q	0.2	0.01	1000000	7
IndivQLearningVarNearbyObs1/1078_107_8	decentralized	True	-10	True	GridWorld	SUNY	NearbyObsDiscrete	Individual_Q	0.2	0.01	1000000	8
IndivQLearningVarNearbyObs1/1079_107_9	decentralized	True	-10	True	GridWorld	SUNY	NearbyObsDiscrete	Individual_Q	0.2	0.01	1000000	9
IndivQLearningVarNearbyObs1/1080_108_0	decentralized	True	0	True	GridWorld	SUNY	FullObsDiscrete	Individual_Q	0.2	0.2	1000000	0
IndivQLearningVarNearbyObs1/1081_108_1	decentralized	True	0	True	GridWorld	SUNY	FullObsDiscrete	Individual_Q	0.2	0.2	1000000	1
IndivQLearningVarNearbyObs1/1082_108_2	decentralized	True	0	True	GridWorld	SUNY	FullObsDiscrete	Individual_Q	0.2	0.2	1000000	2
IndivQLearningVarNearbyObs1/1083_108_3	decentralized	True	0	True	GridWorld	SUNY	FullObsDiscrete	Individual_Q	0.2	0.2	1000000	3
IndivQLearningVarNearbyObs1/1084_108_4	decentralized	True	0	True	GridWorld	SUNY	FullObsDiscrete	Individual_Q	0.2	0.2	1000000	4
IndivQLearningVarNearbyObs1/1085_108_5	decentralized	True	0	True	GridWorld	SUNY	FullObsDiscrete	Individual_Q	0.2	0.2	1000000	5
IndivQLearningVarNearbyObs1/1086_108_6	decentralized	True	0	True	GridWorld	SUNY	FullObsDiscrete	Individual_Q	0.2	0.2	1000000	6
IndivQLearningVarNearbyObs1/1087_108_7	decentralized	True	0	True	GridWorld	SUNY	FullObsDiscrete	Individual_Q	0.2	0.2	1000000	7
IndivQLearningVarNearbyObs1/1088_108_8	decentralized	True	0	True	GridWorld	SUNY	FullObsDiscrete	Individual_Q	0.2	0.2	1000000	8
IndivQLearningVarNearbyObs1/1089_108_9	decentralized	True	0	True	GridWorld	SUNY	FullObsDiscrete	Individual_Q	0.2	0.2	1000000	9
IndivQLearningVarNearbyObs1/1090_109_0	decentralized	True	-10	True	GridWorld	SUNY	FullObsDiscrete	Individual_Q	0.2	0.2	1000000	0
IndivQLearningVarNearbyObs1/1091_109_1	decentralized	True	-10	True	GridWorld	SUNY	FullObsDiscrete	Individual_Q	0.2	0.2	1000000	1
IndivQLearningVarNearbyObs1/1092_109_2	decentralized	True	-10	True	GridWorld	SUNY	FullObsDiscrete	Individual_Q	0.2	0.2	1000000	2
IndivQLearningVarNearbyObs1/1093_109_3	decentralized	True	-10	True	GridWorld	SUNY	FullObsDiscrete	Individual_Q	0.2	0.2	1000000	3
IndivQLearningVarNearbyObs1/1094_109_4	decentralized	True	-10	True	GridWorld	SUNY	FullObsDiscrete	Individual_Q	0.2	0.2	1000000	4
IndivQLearningVarNearbyObs1/1095_109_5	decentralized	True	-10	True	GridWorld	SUNY	FullObsDiscrete	Individual_Q	0.2	0.2	1000000	5
IndivQLearningVarNearbyObs1/1096_109_6	decentralized	True	-10	True	GridWorld	SUNY	FullObsDiscrete	Individual_Q	0.2	0.2	1000000	6
IndivQLearningVarNearbyObs1/1097_109_7	decentralized	True	-10	True	GridWorld	SUNY	FullObsDiscrete	Individual_Q	0.2	0.2	1000000	7
IndivQLearningVarNearbyObs1/1098_109_8	decentralized	True	-10	True	GridWorld	SUNY	FullObsDiscrete	Individual_Q	0.2	0.2	1000000	8
IndivQLearningVarNearbyObs1/1099_109_9	decentralized	True	-10	True	GridWorld	SUNY	FullObsDiscrete	Individual_Q	0.2	0.2	1000000	9
IndivQLearningVarNearbyObs1/1100_110_0	decentralized	True	0	True	GridWorld	SUNY	FullObsDiscrete	Individual_Q	0.2	0.01	1000000	0
IndivQLearningVarNearbyObs1/1101_110_1	decentralized	True	0	True	GridWorld	SUNY	FullObsDiscrete	Individual_Q	0.2	0.01	1000000	1
IndivQLearningVarNearbyObs1/1102_110_2	decentralized	True	0	True	GridWorld	SUNY	FullObsDiscrete	Individual_Q	0.2	0.01	1000000	2
IndivQLearningVarNearbyObs1/1103_110_3	decentralized	True	0	True	GridWorld	SUNY	FullObsDiscrete	Individual_Q	0.2	0.01	1000000	3
IndivQLearningVarNearbyObs1/1104_110_4	decentralized	True	0	True	GridWorld	SUNY	FullObsDiscrete	Individual_Q	0.2	0.01	1000000	4
IndivQLearningVarNearbyObs1/1105_110_5	decentralized	True	0	True	GridWorld	SUNY	FullObsDiscrete	Individual_Q	0.2	0.01	1000000	5
IndivQLearningVarNearbyObs1/1106_110_6	decentralized	True	0	True	GridWorld	SUNY	FullObsDiscrete	Individual_Q	0.2	0.01	1000000	6
IndivQLearningVarNearbyObs1/1107_110_7	decentralized	True	0	True	GridWorld	SUNY	FullObsDiscrete	Individual_Q	0.2	0.01	1000000	7
IndivQLearningVarNearbyObs1/1108_110_8	decentralized	True	0	True	GridWorld	SUNY	FullObsDiscrete	Individual_Q	0.2	0.01	1000000	8
IndivQLearningVarNearbyObs1/1109_110_9	decentralized	True	0	True	GridWorld	SUNY	FullObsDiscrete	Individual_Q	0.2	0.01	1000000	9
IndivQLearningVarNearbyObs1/1110_111_0	decentralized	True	-10	True	GridWorld	SUNY	FullObsDiscrete	Individual_Q	0.2	0.01	1000000	0
IndivQLearningVarNearbyObs1/1111_111_1	decentralized	True	-10	True	GridWorld	SUNY	FullObsDiscrete	Individual_Q	0.2	0.01	1000000	1
IndivQLearningVarNearbyObs1/1112_111_2	decentralized	True	-10	True	GridWorld	SUNY	FullObsDiscrete	Individual_Q	0.2	0.01	1000000	2
IndivQLearningVarNearbyObs1/1113_111_3	decentralized	True	-10	True	GridWorld	SUNY	FullObsDiscrete	Individual_Q	0.2	0.01	1000000	3
IndivQLearningVarNearbyObs1/1114_111_4	decentralized	True	-10	True	GridWorld	SUNY	FullObsDiscrete	Individual_Q	0.2	0.01	1000000	4
IndivQLearningVarNearbyObs1/1115_111_5	decentralized	True	-10	True	GridWorld	SUNY	FullObsDiscrete	Individual_Q	0.2	0.01	1000000	5
IndivQLearningVarNearbyObs1/1116_111_6	decentralized	True	-10	True	GridWorld	SUNY	FullObsDiscrete	Individual_Q	0.2	0.01	1000000	6
IndivQLearningVarNearbyObs1/1117_111_7	decentralized	True	-10	True	GridWorld	SUNY	FullObsDiscrete	Individual_Q	0.2	0.01	1000000	7
IndivQLearningVarNearbyObs1/1118_111_8	decentralized	True	-10	True	GridWorld	SUNY	FullObsDiscrete	Individual_Q	0.2	0.01	1000000	8
IndivQLearningVarNearbyObs1/1119_111_9	decentralized	True	-10	True	GridWorld	SUNY	FullObsDiscrete	Individual_Q	0.2	0.01	1000000	9
IndivQLearningVarNearbyObs1/1120_112_0	none	True	0	True	GridWorld	SUNY	NearbyObsDiscrete	Individual_Q	0.2	0.2	1000000	0
IndivQLearningVarNearbyObs1/1121_112_1	none	True	0	True	GridWorld	SUNY	NearbyObsDiscrete	Individual_Q	0.2	0.2	1000000	1
IndivQLearningVarNearbyObs1/1122_112_2	none	True	0	True	GridWorld	SUNY	NearbyObsDiscrete	Individual_Q	0.2	0.2	1000000	2
IndivQLearningVarNearbyObs1/1123_112_3	none	True	0	True	GridWorld	SUNY	NearbyObsDiscrete	Individual_Q	0.2	0.2	1000000	3
IndivQLearningVarNearbyObs1/1124_112_4	none	True	0	True	GridWorld	SUNY	NearbyObsDiscrete	Individual_Q	0.2	0.2	1000000	4
IndivQLearningVarNearbyObs1/1125_112_5	none	True	0	True	GridWorld	SUNY	NearbyObsDiscrete	Individual_Q	0.2	0.2	1000000	5
IndivQLearningVarNearbyObs1/1126_112_6	none	True	0	True	GridWorld	SUNY	NearbyObsDiscrete	Individual_Q	0.2	0.2	1000000	6
IndivQLearningVarNearbyObs1/1127_112_7	none	True	0	True	GridWorld	SUNY	NearbyObsDiscrete	Individual_Q	0.2	0.2	1000000	7
IndivQLearningVarNearbyObs1/1128_112_8	none	True	0	True	GridWorld	SUNY	NearbyObsDiscrete	Individual_Q	0.2	0.2	1000000	8
IndivQLearningVarNearbyObs1/1129_112_9	none	True	0	True	GridWorld	SUNY	NearbyObsDiscrete	Individual_Q	0.2	0.2	1000000	9
IndivQLearningVarNearbyObs1/1130_113_0	none	True	-10	True	GridWorld	SUNY	NearbyObsDiscrete	Individual_Q	0.2	0.2	1000000	0
IndivQLearningVarNearbyObs1/1131_113_1	none	True	-10	True	GridWorld	SUNY	NearbyObsDiscrete	Individual_Q	0.2	0.2	1000000	1
IndivQLearningVarNearbyObs1/1132_113_2	none	True	-10	True	GridWorld	SUNY	NearbyObsDiscrete	Individual_Q	0.2	0.2	1000000	2
IndivQLearningVarNearbyObs1/1133_113_3	none	True	-10	True	GridWorld	SUNY	NearbyObsDiscrete	Individual_Q	0.2	0.2	1000000	3
IndivQLearningVarNearbyObs1/1134_113_4	none	True	-10	True	GridWorld	SUNY	NearbyObsDiscrete	Individual_Q	0.2	0.2	1000000	4
IndivQLearningVarNearbyObs1/1135_113_5	none	True	-10	True	GridWorld	SUNY	NearbyObsDiscrete	Individual_Q	0.2	0.2	1000000	5
IndivQLearningVarNearbyObs1/1136_113_6	none	True	-10	True	GridWorld	SUNY	NearbyObsDiscrete	Individual_Q	0.2	0.2	1000000	6
IndivQLearningVarNearbyObs1/1137_113_7	none	True	-10	True	GridWorld	SUNY	NearbyObsDiscrete	Individual_Q	0.2	0.2	1000000	7
IndivQLearningVarNearbyObs1/1138_113_8	none	True	-10	True	GridWorld	SUNY	NearbyObsDiscrete	Individual_Q	0.2	0.2	1000000	8
IndivQLearningVarNearbyObs1/1139_113_9	none	True	-10	True	GridWorld	SUNY	NearbyObsDiscrete	Individual_Q	0.2	0.2	1000000	9
IndivQLearningVarNearbyObs1/1140_114_0	none	True	0	True	GridWorld	SUNY	NearbyObsDiscrete	Individual_Q	0.2	0.01	1000000	0
IndivQLearningVarNearbyObs1/1141_114_1	none	True	0	True	GridWorld	SUNY	NearbyObsDiscrete	Individual_Q	0.2	0.01	1000000	1
IndivQLearningVarNearbyObs1/1142_114_2	none	True	0	True	GridWorld	SUNY	NearbyObsDiscrete	Individual_Q	0.2	0.01	1000000	2
IndivQLearningVarNearbyObs1/1143_114_3	none	True	0	True	GridWorld	SUNY	NearbyObsDiscrete	Individual_Q	0.2	0.01	1000000	3
IndivQLearningVarNearbyObs1/1144_114_4	none	True	0	True	GridWorld	SUNY	NearbyObsDiscrete	Individual_Q	0.2	0.01	1000000	4
IndivQLearningVarNearbyObs1/1145_114_5	none	True	0	True	GridWorld	SUNY	NearbyObsDiscrete	Individual_Q	0.2	0.01	1000000	5
IndivQLearningVarNearbyObs1/1146_114_6	none	True	0	True	GridWorld	SUNY	NearbyObsDiscrete	Individual_Q	0.2	0.01	1000000	6
IndivQLearningVarNearbyObs1/1147_114_7	none	True	0	True	GridWorld	SUNY	NearbyObsDiscrete	Individual_Q	0.2	0.01	1000000	7
IndivQLearningVarNearbyObs1/1148_114_8	none	True	0	True	GridWorld	SUNY	NearbyObsDiscrete	Individual_Q	0.2	0.01	1000000	8
IndivQLearningVarNearbyObs1/1149_114_9	none	True	0	True	GridWorld	SUNY	NearbyObsDiscrete	Individual_Q	0.2	0.01	1000000	9
IndivQLearningVarNearbyObs1/1150_115_0	none	True	-10	True	GridWorld	SUNY	NearbyObsDiscrete	Individual_Q	0.2	0.01	1000000	0
IndivQLearningVarNearbyObs1/1151_115_1	none	True	-10	True	GridWorld	SUNY	NearbyObsDiscrete	Individual_Q	0.2	0.01	1000000	1
IndivQLearningVarNearbyObs1/1152_115_2	none	True	-10	True	GridWorld	SUNY	NearbyObsDiscrete	Individual_Q	0.2	0.01	1000000	2
IndivQLearningVarNearbyObs1/1153_115_3	none	True	-10	True	GridWorld	SUNY	NearbyObsDiscrete	Individual_Q	0.2	0.01	1000000	3
IndivQLearningVarNearbyObs1/1154_115_4	none	True	-10	True	GridWorld	SUNY	NearbyObsDiscrete	Individual_Q	0.2	0.01	1000000	4
IndivQLearningVarNearbyObs1/1155_115_5	none	True	-10	True	GridWorld	SUNY	NearbyObsDiscrete	Individual_Q	0.2	0.01	1000000	5
IndivQLearningVarNearbyObs1/1156_115_6	none	True	-10	True	GridWorld	SUNY	NearbyObsDiscrete	Individual_Q	0.2	0.01	1000000	6
IndivQLearningVarNearbyObs1/1157_115_7	none	True	-10	True	GridWorld	SUNY	NearbyObsDiscrete	Individual_Q	0.2	0.01	1000000	7
IndivQLearningVarNearbyObs1/1158_115_8	none	True	-10	True	GridWorld	SUNY	NearbyObsDiscrete	Individual_Q	0.2	0.01	1000000	8
IndivQLearningVarNearbyObs1/1159_115_9	none	True	-10	True	GridWorld	SUNY	NearbyObsDiscrete	Individual_Q	0.2	0.01	1000000	9
IndivQLearningVarNearbyObs1/1160_116_0	none	True	0	True	GridWorld	SUNY	FullObsDiscrete	Individual_Q	0.2	0.2	1000000	0
IndivQLearningVarNearbyObs1/1161_116_1	none	True	0	True	GridWorld	SUNY	FullObsDiscrete	Individual_Q	0.2	0.2	1000000	1
IndivQLearningVarNearbyObs1/1162_116_2	none	True	0	True	GridWorld	SUNY	FullObsDiscrete	Individual_Q	0.2	0.2	1000000	2
IndivQLearningVarNearbyObs1/1163_116_3	none	True	0	True	GridWorld	SUNY	FullObsDiscrete	Individual_Q	0.2	0.2	1000000	3
IndivQLearningVarNearbyObs1/1164_116_4	none	True	0	True	GridWorld	SUNY	FullObsDiscrete	Individual_Q	0.2	0.2	1000000	4
IndivQLearningVarNearbyObs1/1165_116_5	none	True	0	True	GridWorld	SUNY	FullObsDiscrete	Individual_Q	0.2	0.2	1000000	5
IndivQLearningVarNearbyObs1/1166_116_6	none	True	0	True	GridWorld	SUNY	FullObsDiscrete	Individual_Q	0.2	0.2	1000000	6
IndivQLearningVarNearbyObs1/1167_116_7	none	True	0	True	GridWorld	SUNY	FullObsDiscrete	Individual_Q	0.2	0.2	1000000	7
IndivQLearningVarNearbyObs1/1168_116_8	none	True	0	True	GridWorld	SUNY	FullObsDiscrete	Individual_Q	0.2	0.2	1000000	8
IndivQLearningVarNearbyObs1/1169_116_9	none	True	0	True	GridWorld	SUNY	FullObsDiscrete	Individual_Q	0.2	0.2	1000000	9
IndivQLearningVarNearbyObs1/1170_117_0	none	True	-10	True	GridWorld	SUNY	FullObsDiscrete	Individual_Q	0.2	0.2	1000000	0
IndivQLearningVarNearbyObs1/1171_117_1	none	True	-10	True	GridWorld	SUNY	FullObsDiscrete	Individual_Q	0.2	0.2	1000000	1
IndivQLearningVarNearbyObs1/1172_117_2	none	True	-10	True	GridWorld	SUNY	FullObsDiscrete	Individual_Q	0.2	0.2	1000000	2
IndivQLearningVarNearbyObs1/1173_117_3	none	True	-10	True	GridWorld	SUNY	FullObsDiscrete	Individual_Q	0.2	0.2	1000000	3
IndivQLearningVarNearbyObs1/1174_117_4	none	True	-10	True	GridWorld	SUNY	FullObsDiscrete	Individual_Q	0.2	0.2	1000000	4
IndivQLearningVarNearbyObs1/1175_117_5	none	True	-10	True	GridWorld	SUNY	FullObsDiscrete	Individual_Q	0.2	0.2	1000000	5
IndivQLearningVarNearbyObs1/1176_117_6	none	True	-10	True	GridWorld	SUNY	FullObsDiscrete	Individual_Q	0.2	0.2	1000000	6
IndivQLearningVarNearbyObs1/1177_117_7	none	True	-10	True	GridWorld	SUNY	FullObsDiscrete	Individual_Q	0.2	0.2	1000000	7
IndivQLearningVarNearbyObs1/1178_117_8	none	True	-10	True	GridWorld	SUNY	FullObsDiscrete	Individual_Q	0.2	0.2	1000000	8
IndivQLearningVarNearbyObs1/1179_117_9	none	True	-10	True	GridWorld	SUNY	FullObsDiscrete	Individual_Q	0.2	0.2	1000000	9
IndivQLearningVarNearbyObs1/1180_118_0	none	True	0	True	GridWorld	SUNY	FullObsDiscrete	Individual_Q	0.2	0.01	1000000	0
IndivQLearningVarNearbyObs1/1181_118_1	none	True	0	True	GridWorld	SUNY	FullObsDiscrete	Individual_Q	0.2	0.01	1000000	1
IndivQLearningVarNearbyObs1/1182_118_2	none	True	0	True	GridWorld	SUNY	FullObsDiscrete	Individual_Q	0.2	0.01	1000000	2
IndivQLearningVarNearbyObs1/1183_118_3	none	True	0	True	GridWorld	SUNY	FullObsDiscrete	Individual_Q	0.2	0.01	1000000	3
IndivQLearningVarNearbyObs1/1184_118_4	none	True	0	True	GridWorld	SUNY	FullObsDiscrete	Individual_Q	0.2	0.01	1000000	4
IndivQLearningVarNearbyObs1/1185_118_5	none	True	0	True	GridWorld	SUNY	FullObsDiscrete	Individual_Q	0.2	0.01	1000000	5
IndivQLearningVarNearbyObs1/1186_118_6	none	True	0	True	GridWorld	SUNY	FullObsDiscrete	Individual_Q	0.2	0.01	1000000	6
IndivQLearningVarNearbyObs1/1187_118_7	none	True	0	True	GridWorld	SUNY	FullObsDiscrete	Individual_Q	0.2	0.01	1000000	7
IndivQLearningVarNearbyObs1/1188_118_8	none	True	0	True	GridWorld	SUNY	FullObsDiscrete	Individual_Q	0.2	0.01	1000000	8
IndivQLearningVarNearbyObs1/1189_118_9	none	True	0	True	GridWorld	SUNY	FullObsDiscrete	Individual_Q	0.2	0.01	1000000	9
IndivQLearningVarNearbyObs1/1190_119_0	none	True	-10	True	GridWorld	SUNY	FullObsDiscrete	Individual_Q	0.2	0.01	1000000	0
IndivQLearningVarNearbyObs1/1191_119_1	none	True	-10	True	GridWorld	SUNY	FullObsDiscrete	Individual_Q	0.2	0.01	1000000	1
IndivQLearningVarNearbyObs1/1192_119_2	none	True	-10	True	GridWorld	SUNY	FullObsDiscrete	Individual_Q	0.2	0.01	1000000	2
IndivQLearningVarNearbyObs1/1193_119_3	none	True	-10	True	GridWorld	SUNY	FullObsDiscrete	Individual_Q	0.2	0.01	1000000	3
IndivQLearningVarNearbyObs1/1194_119_4	none	True	-10	True	GridWorld	SUNY	FullObsDiscrete	Individual_Q	0.2	0.01	1000000	4
IndivQLearningVarNearbyObs1/1195_119_5	none	True	-10	True	GridWorld	SUNY	FullObsDiscrete	Individual_Q	0.2	0.01	1000000	5
IndivQLearningVarNearbyObs1/1196_119_6	none	True	-10	True	GridWorld	SUNY	FullObsDiscrete	Individual_Q	0.2	0.01	1000000	6
IndivQLearningVarNearbyObs1/1197_119_7	none	True	-10	True	GridWorld	SUNY	FullObsDiscrete	Individual_Q	0.2	0.01	1000000	7
IndivQLearningVarNearbyObs1/1198_119_8	none	True	-10	True	GridWorld	SUNY	FullObsDiscrete	Individual_Q	0.2	0.01	1000000	8
IndivQLearningVarNearbyObs1/1199_119_9	none	True	-10	True	GridWorld	SUNY	FullObsDiscrete	Individual_Q	0.2	0.01	1000000	9
IndivQLearningVarNearbyObs1/1200_120_0	centralized	True	0	False	GridWorld	SUNY	NearbyObsDiscrete	Individual_Q	0.2	0.2	1000000	0
IndivQLearningVarNearbyObs1/1201_120_1	centralized	True	0	False	GridWorld	SUNY	NearbyObsDiscrete	Individual_Q	0.2	0.2	1000000	1
IndivQLearningVarNearbyObs1/1202_120_2	centralized	True	0	False	GridWorld	SUNY	NearbyObsDiscrete	Individual_Q	0.2	0.2	1000000	2
IndivQLearningVarNearbyObs1/1203_120_3	centralized	True	0	False	GridWorld	SUNY	NearbyObsDiscrete	Individual_Q	0.2	0.2	1000000	3
IndivQLearningVarNearbyObs1/1204_120_4	centralized	True	0	False	GridWorld	SUNY	NearbyObsDiscrete	Individual_Q	0.2	0.2	1000000	4
IndivQLearningVarNearbyObs1/1205_120_5	centralized	True	0	False	GridWorld	SUNY	NearbyObsDiscrete	Individual_Q	0.2	0.2	1000000	5
IndivQLearningVarNearbyObs1/1206_120_6	centralized	True	0	False	GridWorld	SUNY	NearbyObsDiscrete	Individual_Q	0.2	0.2	1000000	6
IndivQLearningVarNearbyObs1/1207_120_7	centralized	True	0	False	GridWorld	SUNY	NearbyObsDiscrete	Individual_Q	0.2	0.2	1000000	7
IndivQLearningVarNearbyObs1/1208_120_8	centralized	True	0	False	GridWorld	SUNY	NearbyObsDiscrete	Individual_Q	0.2	0.2	1000000	8
IndivQLearningVarNearbyObs1/1209_120_9	centralized	True	0	False	GridWorld	SUNY	NearbyObsDiscrete	Individual_Q	0.2	0.2	1000000	9
IndivQLearningVarNearbyObs1/1210_121_0	centralized	True	-10	False	GridWorld	SUNY	NearbyObsDiscrete	Individual_Q	0.2	0.2	1000000	0
IndivQLearningVarNearbyObs1/1211_121_1	centralized	True	-10	False	GridWorld	SUNY	NearbyObsDiscrete	Individual_Q	0.2	0.2	1000000	1
IndivQLearningVarNearbyObs1/1212_121_2	centralized	True	-10	False	GridWorld	SUNY	NearbyObsDiscrete	Individual_Q	0.2	0.2	1000000	2
IndivQLearningVarNearbyObs1/1213_121_3	centralized	True	-10	False	GridWorld	SUNY	NearbyObsDiscrete	Individual_Q	0.2	0.2	1000000	3
IndivQLearningVarNearbyObs1/1214_121_4	centralized	True	-10	False	GridWorld	SUNY	NearbyObsDiscrete	Individual_Q	0.2	0.2	1000000	4
IndivQLearningVarNearbyObs1/1215_121_5	centralized	True	-10	False	GridWorld	SUNY	NearbyObsDiscrete	Individual_Q	0.2	0.2	1000000	5
IndivQLearningVarNearbyObs1/1216_121_6	centralized	True	-10	False	GridWorld	SUNY	NearbyObsDiscrete	Individual_Q	0.2	0.2	1000000	6
IndivQLearningVarNearbyObs1/1217_121_7	centralized	True	-10	False	GridWorld	SUNY	NearbyObsDiscrete	Individual_Q	0.2	0.2	1000000	7
IndivQLearningVarNearbyObs1/1218_121_8	centralized	True	-10	False	GridWorld	SUNY	NearbyObsDiscrete	Individual_Q	0.2	0.2	1000000	8
IndivQLearningVarNearbyObs1/1219_121_9	centralized	True	-10	False	GridWorld	SUNY	NearbyObsDiscrete	Individual_Q	0.2	0.2	1000000	9
IndivQLearningVarNearbyObs1/1220_122_0	centralized	True	0	False	GridWorld	SUNY	NearbyObsDiscrete	Individual_Q	0.2	0.01	1000000	0
IndivQLearningVarNearbyObs1/1221_122_1	centralized	True	0	False	GridWorld	SUNY	NearbyObsDiscrete	Individual_Q	0.2	0.01	1000000	1
IndivQLearningVarNearbyObs1/1222_122_2	centralized	True	0	False	GridWorld	SUNY	NearbyObsDiscrete	Individual_Q	0.2	0.01	1000000	2
IndivQLearningVarNearbyObs1/1223_122_3	centralized	True	0	False	GridWorld	SUNY	NearbyObsDiscrete	Individual_Q	0.2	0.01	1000000	3
IndivQLearningVarNearbyObs1/1224_122_4	centralized	True	0	False	GridWorld	SUNY	NearbyObsDiscrete	Individual_Q	0.2	0.01	1000000	4
IndivQLearningVarNearbyObs1/1225_122_5	centralized	True	0	False	GridWorld	SUNY	NearbyObsDiscrete	Individual_Q	0.2	0.01	1000000	5
IndivQLearningVarNearbyObs1/1226_122_6	centralized	True	0	False	GridWorld	SUNY	NearbyObsDiscrete	Individual_Q	0.2	0.01	1000000	6
IndivQLearningVarNearbyObs1/1227_122_7	centralized	True	0	False	GridWorld	SUNY	NearbyObsDiscrete	Individual_Q	0.2	0.01	1000000	7
IndivQLearningVarNearbyObs1/1228_122_8	centralized	True	0	False	GridWorld	SUNY	NearbyObsDiscrete	Individual_Q	0.2	0.01	1000000	8
IndivQLearningVarNearbyObs1/1229_122_9	centralized	True	0	False	GridWorld	SUNY	NearbyObsDiscrete	Individual_Q	0.2	0.01	1000000	9
IndivQLearningVarNearbyObs1/1230_123_0	centralized	True	-10	False	GridWorld	SUNY	NearbyObsDiscrete	Individual_Q	0.2	0.01	1000000	0
IndivQLearningVarNearbyObs1/1231_123_1	centralized	True	-10	False	GridWorld	SUNY	NearbyObsDiscrete	Individual_Q	0.2	0.01	1000000	1
IndivQLearningVarNearbyObs1/1232_123_2	centralized	True	-10	False	GridWorld	SUNY	NearbyObsDiscrete	Individual_Q	0.2	0.01	1000000	2
IndivQLearningVarNearbyObs1/1233_123_3	centralized	True	-10	False	GridWorld	SUNY	NearbyObsDiscrete	Individual_Q	0.2	0.01	1000000	3
IndivQLearningVarNearbyObs1/1234_123_4	centralized	True	-10	False	GridWorld	SUNY	NearbyObsDiscrete	Individual_Q	0.2	0.01	1000000	4
IndivQLearningVarNearbyObs1/1235_123_5	centralized	True	-10	False	GridWorld	SUNY	NearbyObsDiscrete	Individual_Q	0.2	0.01	1000000	5
IndivQLearningVarNearbyObs1/1236_123_6	centralized	True	-10	False	GridWorld	SUNY	NearbyObsDiscrete	Individual_Q	0.2	0.01	1000000	6
IndivQLearningVarNearbyObs1/1237_123_7	centralized	True	-10	False	GridWorld	SUNY	NearbyObsDiscrete	Individual_Q	0.2	0.01	1000000	7
IndivQLearningVarNearbyObs1/1238_123_8	centralized	True	-10	False	GridWorld	SUNY	NearbyObsDiscrete	Individual_Q	0.2	0.01	1000000	8
IndivQLearningVarNearbyObs1/1239_123_9	centralized	True	-10	False	GridWorld	SUNY	NearbyObsDiscrete	Individual_Q	0.2	0.01	1000000	9
IndivQLearningVarNearbyObs1/1240_124_0	centralized	True	0	False	GridWorld	SUNY	FullObsDiscrete	Individual_Q	0.2	0.2	1000000	0
IndivQLearningVarNearbyObs1/1241_124_1	centralized	True	0	False	GridWorld	SUNY	FullObsDiscrete	Individual_Q	0.2	0.2	1000000	1
IndivQLearningVarNearbyObs1/1242_124_2	centralized	True	0	False	GridWorld	SUNY	FullObsDiscrete	Individual_Q	0.2	0.2	1000000	2
IndivQLearningVarNearbyObs1/1243_124_3	centralized	True	0	False	GridWorld	SUNY	FullObsDiscrete	Individual_Q	0.2	0.2	1000000	3
IndivQLearningVarNearbyObs1/1244_124_4	centralized	True	0	False	GridWorld	SUNY	FullObsDiscrete	Individual_Q	0.2	0.2	1000000	4
IndivQLearningVarNearbyObs1/1245_124_5	centralized	True	0	False	GridWorld	SUNY	FullObsDiscrete	Individual_Q	0.2	0.2	1000000	5
IndivQLearningVarNearbyObs1/1246_124_6	centralized	True	0	False	GridWorld	SUNY	FullObsDiscrete	Individual_Q	0.2	0.2	1000000	6
IndivQLearningVarNearbyObs1/1247_124_7	centralized	True	0	False	GridWorld	SUNY	FullObsDiscrete	Individual_Q	0.2	0.2	1000000	7
IndivQLearningVarNearbyObs1/1248_124_8	centralized	True	0	False	GridWorld	SUNY	FullObsDiscrete	Individual_Q	0.2	0.2	1000000	8
IndivQLearningVarNearbyObs1/1249_124_9	centralized	True	0	False	GridWorld	SUNY	FullObsDiscrete	Individual_Q	0.2	0.2	1000000	9
IndivQLearningVarNearbyObs1/1250_125_0	centralized	True	-10	False	GridWorld	SUNY	FullObsDiscrete	Individual_Q	0.2	0.2	1000000	0
IndivQLearningVarNearbyObs1/1251_125_1	centralized	True	-10	False	GridWorld	SUNY	FullObsDiscrete	Individual_Q	0.2	0.2	1000000	1
IndivQLearningVarNearbyObs1/1252_125_2	centralized	True	-10	False	GridWorld	SUNY	FullObsDiscrete	Individual_Q	0.2	0.2	1000000	2
IndivQLearningVarNearbyObs1/1253_125_3	centralized	True	-10	False	GridWorld	SUNY	FullObsDiscrete	Individual_Q	0.2	0.2	1000000	3
IndivQLearningVarNearbyObs1/1254_125_4	centralized	True	-10	False	GridWorld	SUNY	FullObsDiscrete	Individual_Q	0.2	0.2	1000000	4
IndivQLearningVarNearbyObs1/1255_125_5	centralized	True	-10	False	GridWorld	SUNY	FullObsDiscrete	Individual_Q	0.2	0.2	1000000	5
IndivQLearningVarNearbyObs1/1256_125_6	centralized	True	-10	False	GridWorld	SUNY	FullObsDiscrete	Individual_Q	0.2	0.2	1000000	6
IndivQLearningVarNearbyObs1/1257_125_7	centralized	True	-10	False	GridWorld	SUNY	FullObsDiscrete	Individual_Q	0.2	0.2	1000000	7
IndivQLearningVarNearbyObs1/1258_125_8	centralized	True	-10	False	GridWorld	SUNY	FullObsDiscrete	Individual_Q	0.2	0.2	1000000	8
IndivQLearningVarNearbyObs1/1259_125_9	centralized	True	-10	False	GridWorld	SUNY	FullObsDiscrete	Individual_Q	0.2	0.2	1000000	9
IndivQLearningVarNearbyObs1/1260_126_0	centralized	True	0	False	GridWorld	SUNY	FullObsDiscrete	Individual_Q	0.2	0.01	1000000	0
IndivQLearningVarNearbyObs1/1261_126_1	centralized	True	0	False	GridWorld	SUNY	FullObsDiscrete	Individual_Q	0.2	0.01	1000000	1
IndivQLearningVarNearbyObs1/1262_126_2	centralized	True	0	False	GridWorld	SUNY	FullObsDiscrete	Individual_Q	0.2	0.01	1000000	2
IndivQLearningVarNearbyObs1/1263_126_3	centralized	True	0	False	GridWorld	SUNY	FullObsDiscrete	Individual_Q	0.2	0.01	1000000	3
IndivQLearningVarNearbyObs1/1264_126_4	centralized	True	0	False	GridWorld	SUNY	FullObsDiscrete	Individual_Q	0.2	0.01	1000000	4
IndivQLearningVarNearbyObs1/1265_126_5	centralized	True	0	False	GridWorld	SUNY	FullObsDiscrete	Individual_Q	0.2	0.01	1000000	5
IndivQLearningVarNearbyObs1/1266_126_6	centralized	True	0	False	GridWorld	SUNY	FullObsDiscrete	Individual_Q	0.2	0.01	1000000	6
IndivQLearningVarNearbyObs1/1267_126_7	centralized	True	0	False	GridWorld	SUNY	FullObsDiscrete	Individual_Q	0.2	0.01	1000000	7
IndivQLearningVarNearbyObs1/1268_126_8	centralized	True	0	False	GridWorld	SUNY	FullObsDiscrete	Individual_Q	0.2	0.01	1000000	8
IndivQLearningVarNearbyObs1/1269_126_9	centralized	True	0	False	GridWorld	SUNY	FullObsDiscrete	Individual_Q	0.2	0.01	1000000	9
IndivQLearningVarNearbyObs1/1270_127_0	centralized	True	-10	False	GridWorld	SUNY	FullObsDiscrete	Individual_Q	0.2	0.01	1000000	0
IndivQLearningVarNearbyObs1/1271_127_1	centralized	True	-10	False	GridWorld	SUNY	FullObsDiscrete	Individual_Q	0.2	0.01	1000000	1
IndivQLearningVarNearbyObs1/1272_127_2	centralized	True	-10	False	GridWorld	SUNY	FullObsDiscrete	Individual_Q	0.2	0.01	1000000	2
IndivQLearningVarNearbyObs1/1273_127_3	centralized	True	-10	False	GridWorld	SUNY	FullObsDiscrete	Individual_Q	0.2	0.01	1000000	3
IndivQLearningVarNearbyObs1/1274_127_4	centralized	True	-10	False	GridWorld	SUNY	FullObsDiscrete	Individual_Q	0.2	0.01	1000000	4
IndivQLearningVarNearbyObs1/1275_127_5	centralized	True	-10	False	GridWorld	SUNY	FullObsDiscrete	Individual_Q	0.2	0.01	1000000	5
IndivQLearningVarNearbyObs1/1276_127_6	centralized	True	-10	False	GridWorld	SUNY	FullObsDiscrete	Individual_Q	0.2	0.01	1000000	6
IndivQLearningVarNearbyObs1/1277_127_7	centralized	True	-10	False	GridWorld	SUNY	FullObsDiscrete	Individual_Q	0.2	0.01	1000000	7
IndivQLearningVarNearbyObs1/1278_127_8	centralized	True	-10	False	GridWorld	SUNY	FullObsDiscrete	Individual_Q	0.2	0.01	1000000	8
IndivQLearningVarNearbyObs1/1279_127_9	centralized	True	-10	False	GridWorld	SUNY	FullObsDiscrete	Individual_Q	0.2	0.01	1000000	9
IndivQLearningVarNearbyObs1/1280_128_0	decentralized	True	0	False	GridWorld	SUNY	NearbyObsDiscrete	Individual_Q	0.2	0.2	1000000	0
IndivQLearningVarNearbyObs1/1281_128_1	decentralized	True	0	False	GridWorld	SUNY	NearbyObsDiscrete	Individual_Q	0.2	0.2	1000000	1
IndivQLearningVarNearbyObs1/1282_128_2	decentralized	True	0	False	GridWorld	SUNY	NearbyObsDiscrete	Individual_Q	0.2	0.2	1000000	2
IndivQLearningVarNearbyObs1/1283_128_3	decentralized	True	0	False	GridWorld	SUNY	NearbyObsDiscrete	Individual_Q	0.2	0.2	1000000	3
IndivQLearningVarNearbyObs1/1284_128_4	decentralized	True	0	False	GridWorld	SUNY	NearbyObsDiscrete	Individual_Q	0.2	0.2	1000000	4
IndivQLearningVarNearbyObs1/1285_128_5	decentralized	True	0	False	GridWorld	SUNY	NearbyObsDiscrete	Individual_Q	0.2	0.2	1000000	5
IndivQLearningVarNearbyObs1/1286_128_6	decentralized	True	0	False	GridWorld	SUNY	NearbyObsDiscrete	Individual_Q	0.2	0.2	1000000	6
IndivQLearningVarNearbyObs1/1287_128_7	decentralized	True	0	False	GridWorld	SUNY	NearbyObsDiscrete	Individual_Q	0.2	0.2	1000000	7
IndivQLearningVarNearbyObs1/1288_128_8	decentralized	True	0	False	GridWorld	SUNY	NearbyObsDiscrete	Individual_Q	0.2	0.2	1000000	8
IndivQLearningVarNearbyObs1/1289_128_9	decentralized	True	0	False	GridWorld	SUNY	NearbyObsDiscrete	Individual_Q	0.2	0.2	1000000	9
IndivQLearningVarNearbyObs1/1290_129_0	decentralized	True	-10	False	GridWorld	SUNY	NearbyObsDiscrete	Individual_Q	0.2	0.2	1000000	0
IndivQLearningVarNearbyObs1/1291_129_1	decentralized	True	-10	False	GridWorld	SUNY	NearbyObsDiscrete	Individual_Q	0.2	0.2	1000000	1
IndivQLearningVarNearbyObs1/1292_129_2	decentralized	True	-10	False	GridWorld	SUNY	NearbyObsDiscrete	Individual_Q	0.2	0.2	1000000	2
IndivQLearningVarNearbyObs1/1293_129_3	decentralized	True	-10	False	GridWorld	SUNY	NearbyObsDiscrete	Individual_Q	0.2	0.2	1000000	3
IndivQLearningVarNearbyObs1/1294_129_4	decentralized	True	-10	False	GridWorld	SUNY	NearbyObsDiscrete	Individual_Q	0.2	0.2	1000000	4
IndivQLearningVarNearbyObs1/1295_129_5	decentralized	True	-10	False	GridWorld	SUNY	NearbyObsDiscrete	Individual_Q	0.2	0.2	1000000	5
IndivQLearningVarNearbyObs1/1296_129_6	decentralized	True	-10	False	GridWorld	SUNY	NearbyObsDiscrete	Individual_Q	0.2	0.2	1000000	6
IndivQLearningVarNearbyObs1/1297_129_7	decentralized	True	-10	False	GridWorld	SUNY	NearbyObsDiscrete	Individual_Q	0.2	0.2	1000000	7
IndivQLearningVarNearbyObs1/1298_129_8	decentralized	True	-10	False	GridWorld	SUNY	NearbyObsDiscrete	Individual_Q	0.2	0.2	1000000	8
IndivQLearningVarNearbyObs1/1299_129_9	decentralized	True	-10	False	GridWorld	SUNY	NearbyObsDiscrete	Individual_Q	0.2	0.2	1000000	9
IndivQLearningVarNearbyObs1/1300_130_0	decentralized	True	0	False	GridWorld	SUNY	NearbyObsDiscrete	Individual_Q	0.2	0.01	1000000	0
IndivQLearningVarNearbyObs1/1301_130_1	decentralized	True	0	False	GridWorld	SUNY	NearbyObsDiscrete	Individual_Q	0.2	0.01	1000000	1
IndivQLearningVarNearbyObs1/1302_130_2	decentralized	True	0	False	GridWorld	SUNY	NearbyObsDiscrete	Individual_Q	0.2	0.01	1000000	2
IndivQLearningVarNearbyObs1/1303_130_3	decentralized	True	0	False	GridWorld	SUNY	NearbyObsDiscrete	Individual_Q	0.2	0.01	1000000	3
IndivQLearningVarNearbyObs1/1304_130_4	decentralized	True	0	False	GridWorld	SUNY	NearbyObsDiscrete	Individual_Q	0.2	0.01	1000000	4
IndivQLearningVarNearbyObs1/1305_130_5	decentralized	True	0	False	GridWorld	SUNY	NearbyObsDiscrete	Individual_Q	0.2	0.01	1000000	5
IndivQLearningVarNearbyObs1/1306_130_6	decentralized	True	0	False	GridWorld	SUNY	NearbyObsDiscrete	Individual_Q	0.2	0.01	1000000	6
IndivQLearningVarNearbyObs1/1307_130_7	decentralized	True	0	False	GridWorld	SUNY	NearbyObsDiscrete	Individual_Q	0.2	0.01	1000000	7
IndivQLearningVarNearbyObs1/1308_130_8	decentralized	True	0	False	GridWorld	SUNY	NearbyObsDiscrete	Individual_Q	0.2	0.01	1000000	8
IndivQLearningVarNearbyObs1/1309_130_9	decentralized	True	0	False	GridWorld	SUNY	NearbyObsDiscrete	Individual_Q	0.2	0.01	1000000	9
IndivQLearningVarNearbyObs1/1310_131_0	decentralized	True	-10	False	GridWorld	SUNY	NearbyObsDiscrete	Individual_Q	0.2	0.01	1000000	0
IndivQLearningVarNearbyObs1/1311_131_1	decentralized	True	-10	False	GridWorld	SUNY	NearbyObsDiscrete	Individual_Q	0.2	0.01	1000000	1
IndivQLearningVarNearbyObs1/1312_131_2	decentralized	True	-10	False	GridWorld	SUNY	NearbyObsDiscrete	Individual_Q	0.2	0.01	1000000	2
IndivQLearningVarNearbyObs1/1313_131_3	decentralized	True	-10	False	GridWorld	SUNY	NearbyObsDiscrete	Individual_Q	0.2	0.01	1000000	3
IndivQLearningVarNearbyObs1/1314_131_4	decentralized	True	-10	False	GridWorld	SUNY	NearbyObsDiscrete	Individual_Q	0.2	0.01	1000000	4
IndivQLearningVarNearbyObs1/1315_131_5	decentralized	True	-10	False	GridWorld	SUNY	NearbyObsDiscrete	Individual_Q	0.2	0.01	1000000	5
IndivQLearningVarNearbyObs1/1316_131_6	decentralized	True	-10	False	GridWorld	SUNY	NearbyObsDiscrete	Individual_Q	0.2	0.01	1000000	6
IndivQLearningVarNearbyObs1/1317_131_7	decentralized	True	-10	False	GridWorld	SUNY	NearbyObsDiscrete	Individual_Q	0.2	0.01	1000000	7
IndivQLearningVarNearbyObs1/1318_131_8	decentralized	True	-10	False	GridWorld	SUNY	NearbyObsDiscrete	Individual_Q	0.2	0.01	1000000	8
IndivQLearningVarNearbyObs1/1319_131_9	decentralized	True	-10	False	GridWorld	SUNY	NearbyObsDiscrete	Individual_Q	0.2	0.01	1000000	9
IndivQLearningVarNearbyObs1/1320_132_0	decentralized	True	0	False	GridWorld	SUNY	FullObsDiscrete	Individual_Q	0.2	0.2	1000000	0
IndivQLearningVarNearbyObs1/1321_132_1	decentralized	True	0	False	GridWorld	SUNY	FullObsDiscrete	Individual_Q	0.2	0.2	1000000	1
IndivQLearningVarNearbyObs1/1322_132_2	decentralized	True	0	False	GridWorld	SUNY	FullObsDiscrete	Individual_Q	0.2	0.2	1000000	2
IndivQLearningVarNearbyObs1/1323_132_3	decentralized	True	0	False	GridWorld	SUNY	FullObsDiscrete	Individual_Q	0.2	0.2	1000000	3
IndivQLearningVarNearbyObs1/1324_132_4	decentralized	True	0	False	GridWorld	SUNY	FullObsDiscrete	Individual_Q	0.2	0.2	1000000	4
IndivQLearningVarNearbyObs1/1325_132_5	decentralized	True	0	False	GridWorld	SUNY	FullObsDiscrete	Individual_Q	0.2	0.2	1000000	5
IndivQLearningVarNearbyObs1/1326_132_6	decentralized	True	0	False	GridWorld	SUNY	FullObsDiscrete	Individual_Q	0.2	0.2	1000000	6
IndivQLearningVarNearbyObs1/1327_132_7	decentralized	True	0	False	GridWorld	SUNY	FullObsDiscrete	Individual_Q	0.2	0.2	1000000	7
IndivQLearningVarNearbyObs1/1328_132_8	decentralized	True	0	False	GridWorld	SUNY	FullObsDiscrete	Individual_Q	0.2	0.2	1000000	8
IndivQLearningVarNearbyObs1/1329_132_9	decentralized	True	0	False	GridWorld	SUNY	FullObsDiscrete	Individual_Q	0.2	0.2	1000000	9
IndivQLearningVarNearbyObs1/1330_133_0	decentralized	True	-10	False	GridWorld	SUNY	FullObsDiscrete	Individual_Q	0.2	0.2	1000000	0
IndivQLearningVarNearbyObs1/1331_133_1	decentralized	True	-10	False	GridWorld	SUNY	FullObsDiscrete	Individual_Q	0.2	0.2	1000000	1
IndivQLearningVarNearbyObs1/1332_133_2	decentralized	True	-10	False	GridWorld	SUNY	FullObsDiscrete	Individual_Q	0.2	0.2	1000000	2
IndivQLearningVarNearbyObs1/1333_133_3	decentralized	True	-10	False	GridWorld	SUNY	FullObsDiscrete	Individual_Q	0.2	0.2	1000000	3
IndivQLearningVarNearbyObs1/1334_133_4	decentralized	True	-10	False	GridWorld	SUNY	FullObsDiscrete	Individual_Q	0.2	0.2	1000000	4
IndivQLearningVarNearbyObs1/1335_133_5	decentralized	True	-10	False	GridWorld	SUNY	FullObsDiscrete	Individual_Q	0.2	0.2	1000000	5
IndivQLearningVarNearbyObs1/1336_133_6	decentralized	True	-10	False	GridWorld	SUNY	FullObsDiscrete	Individual_Q	0.2	0.2	1000000	6
IndivQLearningVarNearbyObs1/1337_133_7	decentralized	True	-10	False	GridWorld	SUNY	FullObsDiscrete	Individual_Q	0.2	0.2	1000000	7
IndivQLearningVarNearbyObs1/1338_133_8	decentralized	True	-10	False	GridWorld	SUNY	FullObsDiscrete	Individual_Q	0.2	0.2	1000000	8
IndivQLearningVarNearbyObs1/1339_133_9	decentralized	True	-10	False	GridWorld	SUNY	FullObsDiscrete	Individual_Q	0.2	0.2	1000000	9
IndivQLearningVarNearbyObs1/1340_134_0	decentralized	True	0	False	GridWorld	SUNY	FullObsDiscrete	Individual_Q	0.2	0.01	1000000	0
IndivQLearningVarNearbyObs1/1341_134_1	decentralized	True	0	False	GridWorld	SUNY	FullObsDiscrete	Individual_Q	0.2	0.01	1000000	1
IndivQLearningVarNearbyObs1/1342_134_2	decentralized	True	0	False	GridWorld	SUNY	FullObsDiscrete	Individual_Q	0.2	0.01	1000000	2
IndivQLearningVarNearbyObs1/1343_134_3	decentralized	True	0	False	GridWorld	SUNY	FullObsDiscrete	Individual_Q	0.2	0.01	1000000	3
IndivQLearningVarNearbyObs1/1344_134_4	decentralized	True	0	False	GridWorld	SUNY	FullObsDiscrete	Individual_Q	0.2	0.01	1000000	4
IndivQLearningVarNearbyObs1/1345_134_5	decentralized	True	0	False	GridWorld	SUNY	FullObsDiscrete	Individual_Q	0.2	0.01	1000000	5
IndivQLearningVarNearbyObs1/1346_134_6	decentralized	True	0	False	GridWorld	SUNY	FullObsDiscrete	Individual_Q	0.2	0.01	1000000	6
IndivQLearningVarNearbyObs1/1347_134_7	decentralized	True	0	False	GridWorld	SUNY	FullObsDiscrete	Individual_Q	0.2	0.01	1000000	7
IndivQLearningVarNearbyObs1/1348_134_8	decentralized	True	0	False	GridWorld	SUNY	FullObsDiscrete	Individual_Q	0.2	0.01	1000000	8
IndivQLearningVarNearbyObs1/1349_134_9	decentralized	True	0	False	GridWorld	SUNY	FullObsDiscrete	Individual_Q	0.2	0.01	1000000	9
IndivQLearningVarNearbyObs1/1350_135_0	decentralized	True	-10	False	GridWorld	SUNY	FullObsDiscrete	Individual_Q	0.2	0.01	1000000	0
IndivQLearningVarNearbyObs1/1351_135_1	decentralized	True	-10	False	GridWorld	SUNY	FullObsDiscrete	Individual_Q	0.2	0.01	1000000	1
IndivQLearningVarNearbyObs1/1352_135_2	decentralized	True	-10	False	GridWorld	SUNY	FullObsDiscrete	Individual_Q	0.2	0.01	1000000	2
IndivQLearningVarNearbyObs1/1353_135_3	decentralized	True	-10	False	GridWorld	SUNY	FullObsDiscrete	Individual_Q	0.2	0.01	1000000	3
IndivQLearningVarNearbyObs1/1354_135_4	decentralized	True	-10	False	GridWorld	SUNY	FullObsDiscrete	Individual_Q	0.2	0.01	1000000	4
IndivQLearningVarNearbyObs1/1355_135_5	decentralized	True	-10	False	GridWorld	SUNY	FullObsDiscrete	Individual_Q	0.2	0.01	1000000	5
IndivQLearningVarNearbyObs1/1356_135_6	decentralized	True	-10	False	GridWorld	SUNY	FullObsDiscrete	Individual_Q	0.2	0.01	1000000	6
IndivQLearningVarNearbyObs1/1357_135_7	decentralized	True	-10	False	GridWorld	SUNY	FullObsDiscrete	Individual_Q	0.2	0.01	1000000	7
IndivQLearningVarNearbyObs1/1358_135_8	decentralized	True	-10	False	GridWorld	SUNY	FullObsDiscrete	Individual_Q	0.2	0.01	1000000	8
IndivQLearningVarNearbyObs1/1359_135_9	decentralized	True	-10	False	GridWorld	SUNY	FullObsDiscrete	Individual_Q	0.2	0.01	1000000	9
IndivQLearningVarNearbyObs1/1360_136_0	none	True	0	False	GridWorld	SUNY	NearbyObsDiscrete	Individual_Q	0.2	0.2	1000000	0
IndivQLearningVarNearbyObs1/1361_136_1	none	True	0	False	GridWorld	SUNY	NearbyObsDiscrete	Individual_Q	0.2	0.2	1000000	1
IndivQLearningVarNearbyObs1/1362_136_2	none	True	0	False	GridWorld	SUNY	NearbyObsDiscrete	Individual_Q	0.2	0.2	1000000	2
IndivQLearningVarNearbyObs1/1363_136_3	none	True	0	False	GridWorld	SUNY	NearbyObsDiscrete	Individual_Q	0.2	0.2	1000000	3
IndivQLearningVarNearbyObs1/1364_136_4	none	True	0	False	GridWorld	SUNY	NearbyObsDiscrete	Individual_Q	0.2	0.2	1000000	4
IndivQLearningVarNearbyObs1/1365_136_5	none	True	0	False	GridWorld	SUNY	NearbyObsDiscrete	Individual_Q	0.2	0.2	1000000	5
IndivQLearningVarNearbyObs1/1366_136_6	none	True	0	False	GridWorld	SUNY	NearbyObsDiscrete	Individual_Q	0.2	0.2	1000000	6
IndivQLearningVarNearbyObs1/1367_136_7	none	True	0	False	GridWorld	SUNY	NearbyObsDiscrete	Individual_Q	0.2	0.2	1000000	7
IndivQLearningVarNearbyObs1/1368_136_8	none	True	0	False	GridWorld	SUNY	NearbyObsDiscrete	Individual_Q	0.2	0.2	1000000	8
IndivQLearningVarNearbyObs1/1369_136_9	none	True	0	False	GridWorld	SUNY	NearbyObsDiscrete	Individual_Q	0.2	0.2	1000000	9
IndivQLearningVarNearbyObs1/1370_137_0	none	True	-10	False	GridWorld	SUNY	NearbyObsDiscrete	Individual_Q	0.2	0.2	1000000	0
IndivQLearningVarNearbyObs1/1371_137_1	none	True	-10	False	GridWorld	SUNY	NearbyObsDiscrete	Individual_Q	0.2	0.2	1000000	1
IndivQLearningVarNearbyObs1/1372_137_2	none	True	-10	False	GridWorld	SUNY	NearbyObsDiscrete	Individual_Q	0.2	0.2	1000000	2
IndivQLearningVarNearbyObs1/1373_137_3	none	True	-10	False	GridWorld	SUNY	NearbyObsDiscrete	Individual_Q	0.2	0.2	1000000	3
IndivQLearningVarNearbyObs1/1374_137_4	none	True	-10	False	GridWorld	SUNY	NearbyObsDiscrete	Individual_Q	0.2	0.2	1000000	4
IndivQLearningVarNearbyObs1/1375_137_5	none	True	-10	False	GridWorld	SUNY	NearbyObsDiscrete	Individual_Q	0.2	0.2	1000000	5
IndivQLearningVarNearbyObs1/1376_137_6	none	True	-10	False	GridWorld	SUNY	NearbyObsDiscrete	Individual_Q	0.2	0.2	1000000	6
IndivQLearningVarNearbyObs1/1377_137_7	none	True	-10	False	GridWorld	SUNY	NearbyObsDiscrete	Individual_Q	0.2	0.2	1000000	7
IndivQLearningVarNearbyObs1/1378_137_8	none	True	-10	False	GridWorld	SUNY	NearbyObsDiscrete	Individual_Q	0.2	0.2	1000000	8
IndivQLearningVarNearbyObs1/1379_137_9	none	True	-10	False	GridWorld	SUNY	NearbyObsDiscrete	Individual_Q	0.2	0.2	1000000	9
IndivQLearningVarNearbyObs1/1380_138_0	none	True	0	False	GridWorld	SUNY	NearbyObsDiscrete	Individual_Q	0.2	0.01	1000000	0
IndivQLearningVarNearbyObs1/1381_138_1	none	True	0	False	GridWorld	SUNY	NearbyObsDiscrete	Individual_Q	0.2	0.01	1000000	1
IndivQLearningVarNearbyObs1/1382_138_2	none	True	0	False	GridWorld	SUNY	NearbyObsDiscrete	Individual_Q	0.2	0.01	1000000	2
IndivQLearningVarNearbyObs1/1383_138_3	none	True	0	False	GridWorld	SUNY	NearbyObsDiscrete	Individual_Q	0.2	0.01	1000000	3
IndivQLearningVarNearbyObs1/1384_138_4	none	True	0	False	GridWorld	SUNY	NearbyObsDiscrete	Individual_Q	0.2	0.01	1000000	4
IndivQLearningVarNearbyObs1/1385_138_5	none	True	0	False	GridWorld	SUNY	NearbyObsDiscrete	Individual_Q	0.2	0.01	1000000	5
IndivQLearningVarNearbyObs1/1386_138_6	none	True	0	False	GridWorld	SUNY	NearbyObsDiscrete	Individual_Q	0.2	0.01	1000000	6
IndivQLearningVarNearbyObs1/1387_138_7	none	True	0	False	GridWorld	SUNY	NearbyObsDiscrete	Individual_Q	0.2	0.01	1000000	7
IndivQLearningVarNearbyObs1/1388_138_8	none	True	0	False	GridWorld	SUNY	NearbyObsDiscrete	Individual_Q	0.2	0.01	1000000	8
IndivQLearningVarNearbyObs1/1389_138_9	none	True	0	False	GridWorld	SUNY	NearbyObsDiscrete	Individual_Q	0.2	0.01	1000000	9
IndivQLearningVarNearbyObs1/1390_139_0	none	True	-10	False	GridWorld	SUNY	NearbyObsDiscrete	Individual_Q	0.2	0.01	1000000	0
IndivQLearningVarNearbyObs1/1391_139_1	none	True	-10	False	GridWorld	SUNY	NearbyObsDiscrete	Individual_Q	0.2	0.01	1000000	1
IndivQLearningVarNearbyObs1/1392_139_2	none	True	-10	False	GridWorld	SUNY	NearbyObsDiscrete	Individual_Q	0.2	0.01	1000000	2
IndivQLearningVarNearbyObs1/1393_139_3	none	True	-10	False	GridWorld	SUNY	NearbyObsDiscrete	Individual_Q	0.2	0.01	1000000	3
IndivQLearningVarNearbyObs1/1394_139_4	none	True	-10	False	GridWorld	SUNY	NearbyObsDiscrete	Individual_Q	0.2	0.01	1000000	4
IndivQLearningVarNearbyObs1/1395_139_5	none	True	-10	False	GridWorld	SUNY	NearbyObsDiscrete	Individual_Q	0.2	0.01	1000000	5
IndivQLearningVarNearbyObs1/1396_139_6	none	True	-10	False	GridWorld	SUNY	NearbyObsDiscrete	Individual_Q	0.2	0.01	1000000	6
IndivQLearningVarNearbyObs1/1397_139_7	none	True	-10	False	GridWorld	SUNY	NearbyObsDiscrete	Individual_Q	0.2	0.01	1000000	7
IndivQLearningVarNearbyObs1/1398_139_8	none	True	-10	False	GridWorld	SUNY	NearbyObsDiscrete	Individual_Q	0.2	0.01	1000000	8
IndivQLearningVarNearbyObs1/1399_139_9	none	True	-10	False	GridWorld	SUNY	NearbyObsDiscrete	Individual_Q	0.2	0.01	1000000	9
IndivQLearningVarNearbyObs1/1400_140_0	none	True	0	False	GridWorld	SUNY	FullObsDiscrete	Individual_Q	0.2	0.2	1000000	0
IndivQLearningVarNearbyObs1/1401_140_1	none	True	0	False	GridWorld	SUNY	FullObsDiscrete	Individual_Q	0.2	0.2	1000000	1
IndivQLearningVarNearbyObs1/1402_140_2	none	True	0	False	GridWorld	SUNY	FullObsDiscrete	Individual_Q	0.2	0.2	1000000	2
IndivQLearningVarNearbyObs1/1403_140_3	none	True	0	False	GridWorld	SUNY	FullObsDiscrete	Individual_Q	0.2	0.2	1000000	3
IndivQLearningVarNearbyObs1/1404_140_4	none	True	0	False	GridWorld	SUNY	FullObsDiscrete	Individual_Q	0.2	0.2	1000000	4
IndivQLearningVarNearbyObs1/1405_140_5	none	True	0	False	GridWorld	SUNY	FullObsDiscrete	Individual_Q	0.2	0.2	1000000	5
IndivQLearningVarNearbyObs1/1406_140_6	none	True	0	False	GridWorld	SUNY	FullObsDiscrete	Individual_Q	0.2	0.2	1000000	6
IndivQLearningVarNearbyObs1/1407_140_7	none	True	0	False	GridWorld	SUNY	FullObsDiscrete	Individual_Q	0.2	0.2	1000000	7
IndivQLearningVarNearbyObs1/1408_140_8	none	True	0	False	GridWorld	SUNY	FullObsDiscrete	Individual_Q	0.2	0.2	1000000	8
IndivQLearningVarNearbyObs1/1409_140_9	none	True	0	False	GridWorld	SUNY	FullObsDiscrete	Individual_Q	0.2	0.2	1000000	9
IndivQLearningVarNearbyObs1/1410_141_0	none	True	-10	False	GridWorld	SUNY	FullObsDiscrete	Individual_Q	0.2	0.2	1000000	0
IndivQLearningVarNearbyObs1/1411_141_1	none	True	-10	False	GridWorld	SUNY	FullObsDiscrete	Individual_Q	0.2	0.2	1000000	1
IndivQLearningVarNearbyObs1/1412_141_2	none	True	-10	False	GridWorld	SUNY	FullObsDiscrete	Individual_Q	0.2	0.2	1000000	2
IndivQLearningVarNearbyObs1/1413_141_3	none	True	-10	False	GridWorld	SUNY	FullObsDiscrete	Individual_Q	0.2	0.2	1000000	3
IndivQLearningVarNearbyObs1/1414_141_4	none	True	-10	False	GridWorld	SUNY	FullObsDiscrete	Individual_Q	0.2	0.2	1000000	4
IndivQLearningVarNearbyObs1/1415_141_5	none	True	-10	False	GridWorld	SUNY	FullObsDiscrete	Individual_Q	0.2	0.2	1000000	5
IndivQLearningVarNearbyObs1/1416_141_6	none	True	-10	False	GridWorld	SUNY	FullObsDiscrete	Individual_Q	0.2	0.2	1000000	6
IndivQLearningVarNearbyObs1/1417_141_7	none	True	-10	False	GridWorld	SUNY	FullObsDiscrete	Individual_Q	0.2	0.2	1000000	7
IndivQLearningVarNearbyObs1/1418_141_8	none	True	-10	False	GridWorld	SUNY	FullObsDiscrete	Individual_Q	0.2	0.2	1000000	8
IndivQLearningVarNearbyObs1/1419_141_9	none	True	-10	False	GridWorld	SUNY	FullObsDiscrete	Individual_Q	0.2	0.2	1000000	9
IndivQLearningVarNearbyObs1/1420_142_0	none	True	0	False	GridWorld	SUNY	FullObsDiscrete	Individual_Q	0.2	0.01	1000000	0
IndivQLearningVarNearbyObs1/1421_142_1	none	True	0	False	GridWorld	SUNY	FullObsDiscrete	Individual_Q	0.2	0.01	1000000	1
IndivQLearningVarNearbyObs1/1422_142_2	none	True	0	False	GridWorld	SUNY	FullObsDiscrete	Individual_Q	0.2	0.01	1000000	2
IndivQLearningVarNearbyObs1/1423_142_3	none	True	0	False	GridWorld	SUNY	FullObsDiscrete	Individual_Q	0.2	0.01	1000000	3
IndivQLearningVarNearbyObs1/1424_142_4	none	True	0	False	GridWorld	SUNY	FullObsDiscrete	Individual_Q	0.2	0.01	1000000	4
IndivQLearningVarNearbyObs1/1425_142_5	none	True	0	False	GridWorld	SUNY	FullObsDiscrete	Individual_Q	0.2	0.01	1000000	5
IndivQLearningVarNearbyObs1/1426_142_6	none	True	0	False	GridWorld	SUNY	FullObsDiscrete	Individual_Q	0.2	0.01	1000000	6
IndivQLearningVarNearbyObs1/1427_142_7	none	True	0	False	GridWorld	SUNY	FullObsDiscrete	Individual_Q	0.2	0.01	1000000	7
IndivQLearningVarNearbyObs1/1428_142_8	none	True	0	False	GridWorld	SUNY	FullObsDiscrete	Individual_Q	0.2	0.01	1000000	8
IndivQLearningVarNearbyObs1/1429_142_9	none	True	0	False	GridWorld	SUNY	FullObsDiscrete	Individual_Q	0.2	0.01	1000000	9
IndivQLearningVarNearbyObs1/1430_143_0	none	True	-10	False	GridWorld	SUNY	FullObsDiscrete	Individual_Q	0.2	0.01	1000000	0
IndivQLearningVarNearbyObs1/1431_143_1	none	True	-10	False	GridWorld	SUNY	FullObsDiscrete	Individual_Q	0.2	0.01	1000000	1
IndivQLearningVarNearbyObs1/1432_143_2	none	True	-10	False	GridWorld	SUNY	FullObsDiscrete	Individual_Q	0.2	0.01	1000000	2
IndivQLearningVarNearbyObs1/1433_143_3	none	True	-10	False	GridWorld	SUNY	FullObsDiscrete	Individual_Q	0.2	0.01	1000000	3
IndivQLearningVarNearbyObs1/1434_143_4	none	True	-10	False	GridWorld	SUNY	FullObsDiscrete	Individual_Q	0.2	0.01	1000000	4
IndivQLearningVarNearbyObs1/1435_143_5	none	True	-10	False	GridWorld	SUNY	FullObsDiscrete	Individual_Q	0.2	0.01	1000000	5
IndivQLearningVarNearbyObs1/1436_143_6	none	True	-10	False	GridWorld	SUNY	FullObsDiscrete	Individual_Q	0.2	0.01	1000000	6
IndivQLearningVarNearbyObs1/1437_143_7	none	True	-10	False	GridWorld	SUNY	FullObsDiscrete	Individual_Q	0.2	0.01	1000000	7
IndivQLearningVarNearbyObs1/1438_143_8	none	True	-10	False	GridWorld	SUNY	FullObsDiscrete	Individual_Q	0.2	0.01	1000000	8
IndivQLearningVarNearbyObs1/1439_143_9	none	True	-10	False	GridWorld	SUNY	FullObsDiscrete	Individual_Q	0.2	0.01	1000000	9
IndivQLearningVarNearbyObs1/1440_144_0	centralized	True	0	True	GridWorld	MIT	NearbyObsDiscrete	Individual_Q	0.2	0.2	1000000	0
IndivQLearningVarNearbyObs1/1441_144_1	centralized	True	0	True	GridWorld	MIT	NearbyObsDiscrete	Individual_Q	0.2	0.2	1000000	1
IndivQLearningVarNearbyObs1/1442_144_2	centralized	True	0	True	GridWorld	MIT	NearbyObsDiscrete	Individual_Q	0.2	0.2	1000000	2
IndivQLearningVarNearbyObs1/1443_144_3	centralized	True	0	True	GridWorld	MIT	NearbyObsDiscrete	Individual_Q	0.2	0.2	1000000	3
IndivQLearningVarNearbyObs1/1444_144_4	centralized	True	0	True	GridWorld	MIT	NearbyObsDiscrete	Individual_Q	0.2	0.2	1000000	4
IndivQLearningVarNearbyObs1/1445_144_5	centralized	True	0	True	GridWorld	MIT	NearbyObsDiscrete	Individual_Q	0.2	0.2	1000000	5
IndivQLearningVarNearbyObs1/1446_144_6	centralized	True	0	True	GridWorld	MIT	NearbyObsDiscrete	Individual_Q	0.2	0.2	1000000	6
IndivQLearningVarNearbyObs1/1447_144_7	centralized	True	0	True	GridWorld	MIT	NearbyObsDiscrete	Individual_Q	0.2	0.2	1000000	7
IndivQLearningVarNearbyObs1/1448_144_8	centralized	True	0	True	GridWorld	MIT	NearbyObsDiscrete	Individual_Q	0.2	0.2	1000000	8
IndivQLearningVarNearbyObs1/1449_144_9	centralized	True	0	True	GridWorld	MIT	NearbyObsDiscrete	Individual_Q	0.2	0.2	1000000	9
IndivQLearningVarNearbyObs1/1450_145_0	centralized	True	-10	True	GridWorld	MIT	NearbyObsDiscrete	Individual_Q	0.2	0.2	1000000	0
IndivQLearningVarNearbyObs1/1451_145_1	centralized	True	-10	True	GridWorld	MIT	NearbyObsDiscrete	Individual_Q	0.2	0.2	1000000	1
IndivQLearningVarNearbyObs1/1452_145_2	centralized	True	-10	True	GridWorld	MIT	NearbyObsDiscrete	Individual_Q	0.2	0.2	1000000	2
IndivQLearningVarNearbyObs1/1453_145_3	centralized	True	-10	True	GridWorld	MIT	NearbyObsDiscrete	Individual_Q	0.2	0.2	1000000	3
IndivQLearningVarNearbyObs1/1454_145_4	centralized	True	-10	True	GridWorld	MIT	NearbyObsDiscrete	Individual_Q	0.2	0.2	1000000	4
IndivQLearningVarNearbyObs1/1455_145_5	centralized	True	-10	True	GridWorld	MIT	NearbyObsDiscrete	Individual_Q	0.2	0.2	1000000	5
IndivQLearningVarNearbyObs1/1456_145_6	centralized	True	-10	True	GridWorld	MIT	NearbyObsDiscrete	Individual_Q	0.2	0.2	1000000	6
IndivQLearningVarNearbyObs1/1457_145_7	centralized	True	-10	True	GridWorld	MIT	NearbyObsDiscrete	Individual_Q	0.2	0.2	1000000	7
IndivQLearningVarNearbyObs1/1458_145_8	centralized	True	-10	True	GridWorld	MIT	NearbyObsDiscrete	Individual_Q	0.2	0.2	1000000	8
IndivQLearningVarNearbyObs1/1459_145_9	centralized	True	-10	True	GridWorld	MIT	NearbyObsDiscrete	Individual_Q	0.2	0.2	1000000	9
IndivQLearningVarNearbyObs1/1460_146_0	centralized	True	0	True	GridWorld	MIT	NearbyObsDiscrete	Individual_Q	0.2	0.01	1000000	0
IndivQLearningVarNearbyObs1/1461_146_1	centralized	True	0	True	GridWorld	MIT	NearbyObsDiscrete	Individual_Q	0.2	0.01	1000000	1
IndivQLearningVarNearbyObs1/1462_146_2	centralized	True	0	True	GridWorld	MIT	NearbyObsDiscrete	Individual_Q	0.2	0.01	1000000	2
IndivQLearningVarNearbyObs1/1463_146_3	centralized	True	0	True	GridWorld	MIT	NearbyObsDiscrete	Individual_Q	0.2	0.01	1000000	3
IndivQLearningVarNearbyObs1/1464_146_4	centralized	True	0	True	GridWorld	MIT	NearbyObsDiscrete	Individual_Q	0.2	0.01	1000000	4
IndivQLearningVarNearbyObs1/1465_146_5	centralized	True	0	True	GridWorld	MIT	NearbyObsDiscrete	Individual_Q	0.2	0.01	1000000	5
IndivQLearningVarNearbyObs1/1466_146_6	centralized	True	0	True	GridWorld	MIT	NearbyObsDiscrete	Individual_Q	0.2	0.01	1000000	6
IndivQLearningVarNearbyObs1/1467_146_7	centralized	True	0	True	GridWorld	MIT	NearbyObsDiscrete	Individual_Q	0.2	0.01	1000000	7
IndivQLearningVarNearbyObs1/1468_146_8	centralized	True	0	True	GridWorld	MIT	NearbyObsDiscrete	Individual_Q	0.2	0.01	1000000	8
IndivQLearningVarNearbyObs1/1469_146_9	centralized	True	0	True	GridWorld	MIT	NearbyObsDiscrete	Individual_Q	0.2	0.01	1000000	9
IndivQLearningVarNearbyObs1/1470_147_0	centralized	True	-10	True	GridWorld	MIT	NearbyObsDiscrete	Individual_Q	0.2	0.01	1000000	0
IndivQLearningVarNearbyObs1/1471_147_1	centralized	True	-10	True	GridWorld	MIT	NearbyObsDiscrete	Individual_Q	0.2	0.01	1000000	1
IndivQLearningVarNearbyObs1/1472_147_2	centralized	True	-10	True	GridWorld	MIT	NearbyObsDiscrete	Individual_Q	0.2	0.01	1000000	2
IndivQLearningVarNearbyObs1/1473_147_3	centralized	True	-10	True	GridWorld	MIT	NearbyObsDiscrete	Individual_Q	0.2	0.01	1000000	3
IndivQLearningVarNearbyObs1/1474_147_4	centralized	True	-10	True	GridWorld	MIT	NearbyObsDiscrete	Individual_Q	0.2	0.01	1000000	4
IndivQLearningVarNearbyObs1/1475_147_5	centralized	True	-10	True	GridWorld	MIT	NearbyObsDiscrete	Individual_Q	0.2	0.01	1000000	5
IndivQLearningVarNearbyObs1/1476_147_6	centralized	True	-10	True	GridWorld	MIT	NearbyObsDiscrete	Individual_Q	0.2	0.01	1000000	6
IndivQLearningVarNearbyObs1/1477_147_7	centralized	True	-10	True	GridWorld	MIT	NearbyObsDiscrete	Individual_Q	0.2	0.01	1000000	7
IndivQLearningVarNearbyObs1/1478_147_8	centralized	True	-10	True	GridWorld	MIT	NearbyObsDiscrete	Individual_Q	0.2	0.01	1000000	8
IndivQLearningVarNearbyObs1/1479_147_9	centralized	True	-10	True	GridWorld	MIT	NearbyObsDiscrete	Individual_Q	0.2	0.01	1000000	9
IndivQLearningVarNearbyObs1/1480_148_0	centralized	True	0	True	GridWorld	MIT	FullObsDiscrete	Individual_Q	0.2	0.2	1000000	0
IndivQLearningVarNearbyObs1/1481_148_1	centralized	True	0	True	GridWorld	MIT	FullObsDiscrete	Individual_Q	0.2	0.2	1000000	1
IndivQLearningVarNearbyObs1/1482_148_2	centralized	True	0	True	GridWorld	MIT	FullObsDiscrete	Individual_Q	0.2	0.2	1000000	2
IndivQLearningVarNearbyObs1/1483_148_3	centralized	True	0	True	GridWorld	MIT	FullObsDiscrete	Individual_Q	0.2	0.2	1000000	3
IndivQLearningVarNearbyObs1/1484_148_4	centralized	True	0	True	GridWorld	MIT	FullObsDiscrete	Individual_Q	0.2	0.2	1000000	4
IndivQLearningVarNearbyObs1/1485_148_5	centralized	True	0	True	GridWorld	MIT	FullObsDiscrete	Individual_Q	0.2	0.2	1000000	5
IndivQLearningVarNearbyObs1/1486_148_6	centralized	True	0	True	GridWorld	MIT	FullObsDiscrete	Individual_Q	0.2	0.2	1000000	6
IndivQLearningVarNearbyObs1/1487_148_7	centralized	True	0	True	GridWorld	MIT	FullObsDiscrete	Individual_Q	0.2	0.2	1000000	7
IndivQLearningVarNearbyObs1/1488_148_8	centralized	True	0	True	GridWorld	MIT	FullObsDiscrete	Individual_Q	0.2	0.2	1000000	8
IndivQLearningVarNearbyObs1/1489_148_9	centralized	True	0	True	GridWorld	MIT	FullObsDiscrete	Individual_Q	0.2	0.2	1000000	9
IndivQLearningVarNearbyObs1/1490_149_0	centralized	True	-10	True	GridWorld	MIT	FullObsDiscrete	Individual_Q	0.2	0.2	1000000	0
IndivQLearningVarNearbyObs1/1491_149_1	centralized	True	-10	True	GridWorld	MIT	FullObsDiscrete	Individual_Q	0.2	0.2	1000000	1
IndivQLearningVarNearbyObs1/1492_149_2	centralized	True	-10	True	GridWorld	MIT	FullObsDiscrete	Individual_Q	0.2	0.2	1000000	2
IndivQLearningVarNearbyObs1/1493_149_3	centralized	True	-10	True	GridWorld	MIT	FullObsDiscrete	Individual_Q	0.2	0.2	1000000	3
IndivQLearningVarNearbyObs1/1494_149_4	centralized	True	-10	True	GridWorld	MIT	FullObsDiscrete	Individual_Q	0.2	0.2	1000000	4
IndivQLearningVarNearbyObs1/1495_149_5	centralized	True	-10	True	GridWorld	MIT	FullObsDiscrete	Individual_Q	0.2	0.2	1000000	5
IndivQLearningVarNearbyObs1/1496_149_6	centralized	True	-10	True	GridWorld	MIT	FullObsDiscrete	Individual_Q	0.2	0.2	1000000	6
IndivQLearningVarNearbyObs1/1497_149_7	centralized	True	-10	True	GridWorld	MIT	FullObsDiscrete	Individual_Q	0.2	0.2	1000000	7
IndivQLearningVarNearbyObs1/1498_149_8	centralized	True	-10	True	GridWorld	MIT	FullObsDiscrete	Individual_Q	0.2	0.2	1000000	8
IndivQLearningVarNearbyObs1/1499_149_9	centralized	True	-10	True	GridWorld	MIT	FullObsDiscrete	Individual_Q	0.2	0.2	1000000	9
IndivQLearningVarNearbyObs1/1500_150_0	centralized	True	0	True	GridWorld	MIT	FullObsDiscrete	Individual_Q	0.2	0.01	1000000	0
IndivQLearningVarNearbyObs1/1501_150_1	centralized	True	0	True	GridWorld	MIT	FullObsDiscrete	Individual_Q	0.2	0.01	1000000	1
IndivQLearningVarNearbyObs1/1502_150_2	centralized	True	0	True	GridWorld	MIT	FullObsDiscrete	Individual_Q	0.2	0.01	1000000	2
IndivQLearningVarNearbyObs1/1503_150_3	centralized	True	0	True	GridWorld	MIT	FullObsDiscrete	Individual_Q	0.2	0.01	1000000	3
IndivQLearningVarNearbyObs1/1504_150_4	centralized	True	0	True	GridWorld	MIT	FullObsDiscrete	Individual_Q	0.2	0.01	1000000	4
IndivQLearningVarNearbyObs1/1505_150_5	centralized	True	0	True	GridWorld	MIT	FullObsDiscrete	Individual_Q	0.2	0.01	1000000	5
IndivQLearningVarNearbyObs1/1506_150_6	centralized	True	0	True	GridWorld	MIT	FullObsDiscrete	Individual_Q	0.2	0.01	1000000	6
IndivQLearningVarNearbyObs1/1507_150_7	centralized	True	0	True	GridWorld	MIT	FullObsDiscrete	Individual_Q	0.2	0.01	1000000	7
IndivQLearningVarNearbyObs1/1508_150_8	centralized	True	0	True	GridWorld	MIT	FullObsDiscrete	Individual_Q	0.2	0.01	1000000	8
IndivQLearningVarNearbyObs1/1509_150_9	centralized	True	0	True	GridWorld	MIT	FullObsDiscrete	Individual_Q	0.2	0.01	1000000	9
IndivQLearningVarNearbyObs1/1510_151_0	centralized	True	-10	True	GridWorld	MIT	FullObsDiscrete	Individual_Q	0.2	0.01	1000000	0
IndivQLearningVarNearbyObs1/1511_151_1	centralized	True	-10	True	GridWorld	MIT	FullObsDiscrete	Individual_Q	0.2	0.01	1000000	1
IndivQLearningVarNearbyObs1/1512_151_2	centralized	True	-10	True	GridWorld	MIT	FullObsDiscrete	Individual_Q	0.2	0.01	1000000	2
IndivQLearningVarNearbyObs1/1513_151_3	centralized	True	-10	True	GridWorld	MIT	FullObsDiscrete	Individual_Q	0.2	0.01	1000000	3
IndivQLearningVarNearbyObs1/1514_151_4	centralized	True	-10	True	GridWorld	MIT	FullObsDiscrete	Individual_Q	0.2	0.01	1000000	4
IndivQLearningVarNearbyObs1/1515_151_5	centralized	True	-10	True	GridWorld	MIT	FullObsDiscrete	Individual_Q	0.2	0.01	1000000	5
IndivQLearningVarNearbyObs1/1516_151_6	centralized	True	-10	True	GridWorld	MIT	FullObsDiscrete	Individual_Q	0.2	0.01	1000000	6
IndivQLearningVarNearbyObs1/1517_151_7	centralized	True	-10	True	GridWorld	MIT	FullObsDiscrete	Individual_Q	0.2	0.01	1000000	7
IndivQLearningVarNearbyObs1/1518_151_8	centralized	True	-10	True	GridWorld	MIT	FullObsDiscrete	Individual_Q	0.2	0.01	1000000	8
IndivQLearningVarNearbyObs1/1519_151_9	centralized	True	-10	True	GridWorld	MIT	FullObsDiscrete	Individual_Q	0.2	0.01	1000000	9
IndivQLearningVarNearbyObs1/1520_152_0	decentralized	True	0	True	GridWorld	MIT	NearbyObsDiscrete	Individual_Q	0.2	0.2	1000000	0
IndivQLearningVarNearbyObs1/1521_152_1	decentralized	True	0	True	GridWorld	MIT	NearbyObsDiscrete	Individual_Q	0.2	0.2	1000000	1
IndivQLearningVarNearbyObs1/1522_152_2	decentralized	True	0	True	GridWorld	MIT	NearbyObsDiscrete	Individual_Q	0.2	0.2	1000000	2
IndivQLearningVarNearbyObs1/1523_152_3	decentralized	True	0	True	GridWorld	MIT	NearbyObsDiscrete	Individual_Q	0.2	0.2	1000000	3
IndivQLearningVarNearbyObs1/1524_152_4	decentralized	True	0	True	GridWorld	MIT	NearbyObsDiscrete	Individual_Q	0.2	0.2	1000000	4
IndivQLearningVarNearbyObs1/1525_152_5	decentralized	True	0	True	GridWorld	MIT	NearbyObsDiscrete	Individual_Q	0.2	0.2	1000000	5
IndivQLearningVarNearbyObs1/1526_152_6	decentralized	True	0	True	GridWorld	MIT	NearbyObsDiscrete	Individual_Q	0.2	0.2	1000000	6
IndivQLearningVarNearbyObs1/1527_152_7	decentralized	True	0	True	GridWorld	MIT	NearbyObsDiscrete	Individual_Q	0.2	0.2	1000000	7
IndivQLearningVarNearbyObs1/1528_152_8	decentralized	True	0	True	GridWorld	MIT	NearbyObsDiscrete	Individual_Q	0.2	0.2	1000000	8
IndivQLearningVarNearbyObs1/1529_152_9	decentralized	True	0	True	GridWorld	MIT	NearbyObsDiscrete	Individual_Q	0.2	0.2	1000000	9
IndivQLearningVarNearbyObs1/1530_153_0	decentralized	True	-10	True	GridWorld	MIT	NearbyObsDiscrete	Individual_Q	0.2	0.2	1000000	0
IndivQLearningVarNearbyObs1/1531_153_1	decentralized	True	-10	True	GridWorld	MIT	NearbyObsDiscrete	Individual_Q	0.2	0.2	1000000	1
IndivQLearningVarNearbyObs1/1532_153_2	decentralized	True	-10	True	GridWorld	MIT	NearbyObsDiscrete	Individual_Q	0.2	0.2	1000000	2
IndivQLearningVarNearbyObs1/1533_153_3	decentralized	True	-10	True	GridWorld	MIT	NearbyObsDiscrete	Individual_Q	0.2	0.2	1000000	3
IndivQLearningVarNearbyObs1/1534_153_4	decentralized	True	-10	True	GridWorld	MIT	NearbyObsDiscrete	Individual_Q	0.2	0.2	1000000	4
IndivQLearningVarNearbyObs1/1535_153_5	decentralized	True	-10	True	GridWorld	MIT	NearbyObsDiscrete	Individual_Q	0.2	0.2	1000000	5
IndivQLearningVarNearbyObs1/1536_153_6	decentralized	True	-10	True	GridWorld	MIT	NearbyObsDiscrete	Individual_Q	0.2	0.2	1000000	6
IndivQLearningVarNearbyObs1/1537_153_7	decentralized	True	-10	True	GridWorld	MIT	NearbyObsDiscrete	Individual_Q	0.2	0.2	1000000	7
IndivQLearningVarNearbyObs1/1538_153_8	decentralized	True	-10	True	GridWorld	MIT	NearbyObsDiscrete	Individual_Q	0.2	0.2	1000000	8
IndivQLearningVarNearbyObs1/1539_153_9	decentralized	True	-10	True	GridWorld	MIT	NearbyObsDiscrete	Individual_Q	0.2	0.2	1000000	9
IndivQLearningVarNearbyObs1/1540_154_0	decentralized	True	0	True	GridWorld	MIT	NearbyObsDiscrete	Individual_Q	0.2	0.01	1000000	0
IndivQLearningVarNearbyObs1/1541_154_1	decentralized	True	0	True	GridWorld	MIT	NearbyObsDiscrete	Individual_Q	0.2	0.01	1000000	1
IndivQLearningVarNearbyObs1/1542_154_2	decentralized	True	0	True	GridWorld	MIT	NearbyObsDiscrete	Individual_Q	0.2	0.01	1000000	2
IndivQLearningVarNearbyObs1/1543_154_3	decentralized	True	0	True	GridWorld	MIT	NearbyObsDiscrete	Individual_Q	0.2	0.01	1000000	3
IndivQLearningVarNearbyObs1/1544_154_4	decentralized	True	0	True	GridWorld	MIT	NearbyObsDiscrete	Individual_Q	0.2	0.01	1000000	4
IndivQLearningVarNearbyObs1/1545_154_5	decentralized	True	0	True	GridWorld	MIT	NearbyObsDiscrete	Individual_Q	0.2	0.01	1000000	5
IndivQLearningVarNearbyObs1/1546_154_6	decentralized	True	0	True	GridWorld	MIT	NearbyObsDiscrete	Individual_Q	0.2	0.01	1000000	6
IndivQLearningVarNearbyObs1/1547_154_7	decentralized	True	0	True	GridWorld	MIT	NearbyObsDiscrete	Individual_Q	0.2	0.01	1000000	7
IndivQLearningVarNearbyObs1/1548_154_8	decentralized	True	0	True	GridWorld	MIT	NearbyObsDiscrete	Individual_Q	0.2	0.01	1000000	8
IndivQLearningVarNearbyObs1/1549_154_9	decentralized	True	0	True	GridWorld	MIT	NearbyObsDiscrete	Individual_Q	0.2	0.01	1000000	9
IndivQLearningVarNearbyObs1/1550_155_0	decentralized	True	-10	True	GridWorld	MIT	NearbyObsDiscrete	Individual_Q	0.2	0.01	1000000	0
IndivQLearningVarNearbyObs1/1551_155_1	decentralized	True	-10	True	GridWorld	MIT	NearbyObsDiscrete	Individual_Q	0.2	0.01	1000000	1
IndivQLearningVarNearbyObs1/1552_155_2	decentralized	True	-10	True	GridWorld	MIT	NearbyObsDiscrete	Individual_Q	0.2	0.01	1000000	2
IndivQLearningVarNearbyObs1/1553_155_3	decentralized	True	-10	True	GridWorld	MIT	NearbyObsDiscrete	Individual_Q	0.2	0.01	1000000	3
IndivQLearningVarNearbyObs1/1554_155_4	decentralized	True	-10	True	GridWorld	MIT	NearbyObsDiscrete	Individual_Q	0.2	0.01	1000000	4
IndivQLearningVarNearbyObs1/1555_155_5	decentralized	True	-10	True	GridWorld	MIT	NearbyObsDiscrete	Individual_Q	0.2	0.01	1000000	5
IndivQLearningVarNearbyObs1/1556_155_6	decentralized	True	-10	True	GridWorld	MIT	NearbyObsDiscrete	Individual_Q	0.2	0.01	1000000	6
IndivQLearningVarNearbyObs1/1557_155_7	decentralized	True	-10	True	GridWorld	MIT	NearbyObsDiscrete	Individual_Q	0.2	0.01	1000000	7
IndivQLearningVarNearbyObs1/1558_155_8	decentralized	True	-10	True	GridWorld	MIT	NearbyObsDiscrete	Individual_Q	0.2	0.01	1000000	8
IndivQLearningVarNearbyObs1/1559_155_9	decentralized	True	-10	True	GridWorld	MIT	NearbyObsDiscrete	Individual_Q	0.2	0.01	1000000	9
IndivQLearningVarNearbyObs1/1560_156_0	decentralized	True	0	True	GridWorld	MIT	FullObsDiscrete	Individual_Q	0.2	0.2	1000000	0
IndivQLearningVarNearbyObs1/1561_156_1	decentralized	True	0	True	GridWorld	MIT	FullObsDiscrete	Individual_Q	0.2	0.2	1000000	1
IndivQLearningVarNearbyObs1/1562_156_2	decentralized	True	0	True	GridWorld	MIT	FullObsDiscrete	Individual_Q	0.2	0.2	1000000	2
IndivQLearningVarNearbyObs1/1563_156_3	decentralized	True	0	True	GridWorld	MIT	FullObsDiscrete	Individual_Q	0.2	0.2	1000000	3
IndivQLearningVarNearbyObs1/1564_156_4	decentralized	True	0	True	GridWorld	MIT	FullObsDiscrete	Individual_Q	0.2	0.2	1000000	4
IndivQLearningVarNearbyObs1/1565_156_5	decentralized	True	0	True	GridWorld	MIT	FullObsDiscrete	Individual_Q	0.2	0.2	1000000	5
IndivQLearningVarNearbyObs1/1566_156_6	decentralized	True	0	True	GridWorld	MIT	FullObsDiscrete	Individual_Q	0.2	0.2	1000000	6
IndivQLearningVarNearbyObs1/1567_156_7	decentralized	True	0	True	GridWorld	MIT	FullObsDiscrete	Individual_Q	0.2	0.2	1000000	7
IndivQLearningVarNearbyObs1/1568_156_8	decentralized	True	0	True	GridWorld	MIT	FullObsDiscrete	Individual_Q	0.2	0.2	1000000	8
IndivQLearningVarNearbyObs1/1569_156_9	decentralized	True	0	True	GridWorld	MIT	FullObsDiscrete	Individual_Q	0.2	0.2	1000000	9
IndivQLearningVarNearbyObs1/1570_157_0	decentralized	True	-10	True	GridWorld	MIT	FullObsDiscrete	Individual_Q	0.2	0.2	1000000	0
IndivQLearningVarNearbyObs1/1571_157_1	decentralized	True	-10	True	GridWorld	MIT	FullObsDiscrete	Individual_Q	0.2	0.2	1000000	1
IndivQLearningVarNearbyObs1/1572_157_2	decentralized	True	-10	True	GridWorld	MIT	FullObsDiscrete	Individual_Q	0.2	0.2	1000000	2
IndivQLearningVarNearbyObs1/1573_157_3	decentralized	True	-10	True	GridWorld	MIT	FullObsDiscrete	Individual_Q	0.2	0.2	1000000	3
IndivQLearningVarNearbyObs1/1574_157_4	decentralized	True	-10	True	GridWorld	MIT	FullObsDiscrete	Individual_Q	0.2	0.2	1000000	4
IndivQLearningVarNearbyObs1/1575_157_5	decentralized	True	-10	True	GridWorld	MIT	FullObsDiscrete	Individual_Q	0.2	0.2	1000000	5
IndivQLearningVarNearbyObs1/1576_157_6	decentralized	True	-10	True	GridWorld	MIT	FullObsDiscrete	Individual_Q	0.2	0.2	1000000	6
IndivQLearningVarNearbyObs1/1577_157_7	decentralized	True	-10	True	GridWorld	MIT	FullObsDiscrete	Individual_Q	0.2	0.2	1000000	7
IndivQLearningVarNearbyObs1/1578_157_8	decentralized	True	-10	True	GridWorld	MIT	FullObsDiscrete	Individual_Q	0.2	0.2	1000000	8
IndivQLearningVarNearbyObs1/1579_157_9	decentralized	True	-10	True	GridWorld	MIT	FullObsDiscrete	Individual_Q	0.2	0.2	1000000	9
IndivQLearningVarNearbyObs1/1580_158_0	decentralized	True	0	True	GridWorld	MIT	FullObsDiscrete	Individual_Q	0.2	0.01	1000000	0
IndivQLearningVarNearbyObs1/1581_158_1	decentralized	True	0	True	GridWorld	MIT	FullObsDiscrete	Individual_Q	0.2	0.01	1000000	1
IndivQLearningVarNearbyObs1/1582_158_2	decentralized	True	0	True	GridWorld	MIT	FullObsDiscrete	Individual_Q	0.2	0.01	1000000	2
IndivQLearningVarNearbyObs1/1583_158_3	decentralized	True	0	True	GridWorld	MIT	FullObsDiscrete	Individual_Q	0.2	0.01	1000000	3
IndivQLearningVarNearbyObs1/1584_158_4	decentralized	True	0	True	GridWorld	MIT	FullObsDiscrete	Individual_Q	0.2	0.01	1000000	4
IndivQLearningVarNearbyObs1/1585_158_5	decentralized	True	0	True	GridWorld	MIT	FullObsDiscrete	Individual_Q	0.2	0.01	1000000	5
IndivQLearningVarNearbyObs1/1586_158_6	decentralized	True	0	True	GridWorld	MIT	FullObsDiscrete	Individual_Q	0.2	0.01	1000000	6
IndivQLearningVarNearbyObs1/1587_158_7	decentralized	True	0	True	GridWorld	MIT	FullObsDiscrete	Individual_Q	0.2	0.01	1000000	7
IndivQLearningVarNearbyObs1/1588_158_8	decentralized	True	0	True	GridWorld	MIT	FullObsDiscrete	Individual_Q	0.2	0.01	1000000	8
IndivQLearningVarNearbyObs1/1589_158_9	decentralized	True	0	True	GridWorld	MIT	FullObsDiscrete	Individual_Q	0.2	0.01	1000000	9
IndivQLearningVarNearbyObs1/1590_159_0	decentralized	True	-10	True	GridWorld	MIT	FullObsDiscrete	Individual_Q	0.2	0.01	1000000	0
IndivQLearningVarNearbyObs1/1591_159_1	decentralized	True	-10	True	GridWorld	MIT	FullObsDiscrete	Individual_Q	0.2	0.01	1000000	1
IndivQLearningVarNearbyObs1/1592_159_2	decentralized	True	-10	True	GridWorld	MIT	FullObsDiscrete	Individual_Q	0.2	0.01	1000000	2
IndivQLearningVarNearbyObs1/1593_159_3	decentralized	True	-10	True	GridWorld	MIT	FullObsDiscrete	Individual_Q	0.2	0.01	1000000	3
IndivQLearningVarNearbyObs1/1594_159_4	decentralized	True	-10	True	GridWorld	MIT	FullObsDiscrete	Individual_Q	0.2	0.01	1000000	4
IndivQLearningVarNearbyObs1/1595_159_5	decentralized	True	-10	True	GridWorld	MIT	FullObsDiscrete	Individual_Q	0.2	0.01	1000000	5
IndivQLearningVarNearbyObs1/1596_159_6	decentralized	True	-10	True	GridWorld	MIT	FullObsDiscrete	Individual_Q	0.2	0.01	1000000	6
IndivQLearningVarNearbyObs1/1597_159_7	decentralized	True	-10	True	GridWorld	MIT	FullObsDiscrete	Individual_Q	0.2	0.01	1000000	7
IndivQLearningVarNearbyObs1/1598_159_8	decentralized	True	-10	True	GridWorld	MIT	FullObsDiscrete	Individual_Q	0.2	0.01	1000000	8
IndivQLearningVarNearbyObs1/1599_159_9	decentralized	True	-10	True	GridWorld	MIT	FullObsDiscrete	Individual_Q	0.2	0.01	1000000	9
IndivQLearningVarNearbyObs1/1600_160_0	none	True	0	True	GridWorld	MIT	NearbyObsDiscrete	Individual_Q	0.2	0.2	1000000	0
IndivQLearningVarNearbyObs1/1601_160_1	none	True	0	True	GridWorld	MIT	NearbyObsDiscrete	Individual_Q	0.2	0.2	1000000	1
IndivQLearningVarNearbyObs1/1602_160_2	none	True	0	True	GridWorld	MIT	NearbyObsDiscrete	Individual_Q	0.2	0.2	1000000	2
IndivQLearningVarNearbyObs1/1603_160_3	none	True	0	True	GridWorld	MIT	NearbyObsDiscrete	Individual_Q	0.2	0.2	1000000	3
IndivQLearningVarNearbyObs1/1604_160_4	none	True	0	True	GridWorld	MIT	NearbyObsDiscrete	Individual_Q	0.2	0.2	1000000	4
IndivQLearningVarNearbyObs1/1605_160_5	none	True	0	True	GridWorld	MIT	NearbyObsDiscrete	Individual_Q	0.2	0.2	1000000	5
IndivQLearningVarNearbyObs1/1606_160_6	none	True	0	True	GridWorld	MIT	NearbyObsDiscrete	Individual_Q	0.2	0.2	1000000	6
IndivQLearningVarNearbyObs1/1607_160_7	none	True	0	True	GridWorld	MIT	NearbyObsDiscrete	Individual_Q	0.2	0.2	1000000	7
IndivQLearningVarNearbyObs1/1608_160_8	none	True	0	True	GridWorld	MIT	NearbyObsDiscrete	Individual_Q	0.2	0.2	1000000	8
IndivQLearningVarNearbyObs1/1609_160_9	none	True	0	True	GridWorld	MIT	NearbyObsDiscrete	Individual_Q	0.2	0.2	1000000	9
IndivQLearningVarNearbyObs1/1610_161_0	none	True	-10	True	GridWorld	MIT	NearbyObsDiscrete	Individual_Q	0.2	0.2	1000000	0
IndivQLearningVarNearbyObs1/1611_161_1	none	True	-10	True	GridWorld	MIT	NearbyObsDiscrete	Individual_Q	0.2	0.2	1000000	1
IndivQLearningVarNearbyObs1/1612_161_2	none	True	-10	True	GridWorld	MIT	NearbyObsDiscrete	Individual_Q	0.2	0.2	1000000	2
IndivQLearningVarNearbyObs1/1613_161_3	none	True	-10	True	GridWorld	MIT	NearbyObsDiscrete	Individual_Q	0.2	0.2	1000000	3
IndivQLearningVarNearbyObs1/1614_161_4	none	True	-10	True	GridWorld	MIT	NearbyObsDiscrete	Individual_Q	0.2	0.2	1000000	4
IndivQLearningVarNearbyObs1/1615_161_5	none	True	-10	True	GridWorld	MIT	NearbyObsDiscrete	Individual_Q	0.2	0.2	1000000	5
IndivQLearningVarNearbyObs1/1616_161_6	none	True	-10	True	GridWorld	MIT	NearbyObsDiscrete	Individual_Q	0.2	0.2	1000000	6
IndivQLearningVarNearbyObs1/1617_161_7	none	True	-10	True	GridWorld	MIT	NearbyObsDiscrete	Individual_Q	0.2	0.2	1000000	7
IndivQLearningVarNearbyObs1/1618_161_8	none	True	-10	True	GridWorld	MIT	NearbyObsDiscrete	Individual_Q	0.2	0.2	1000000	8
IndivQLearningVarNearbyObs1/1619_161_9	none	True	-10	True	GridWorld	MIT	NearbyObsDiscrete	Individual_Q	0.2	0.2	1000000	9
IndivQLearningVarNearbyObs1/1620_162_0	none	True	0	True	GridWorld	MIT	NearbyObsDiscrete	Individual_Q	0.2	0.01	1000000	0
IndivQLearningVarNearbyObs1/1621_162_1	none	True	0	True	GridWorld	MIT	NearbyObsDiscrete	Individual_Q	0.2	0.01	1000000	1
IndivQLearningVarNearbyObs1/1622_162_2	none	True	0	True	GridWorld	MIT	NearbyObsDiscrete	Individual_Q	0.2	0.01	1000000	2
IndivQLearningVarNearbyObs1/1623_162_3	none	True	0	True	GridWorld	MIT	NearbyObsDiscrete	Individual_Q	0.2	0.01	1000000	3
IndivQLearningVarNearbyObs1/1624_162_4	none	True	0	True	GridWorld	MIT	NearbyObsDiscrete	Individual_Q	0.2	0.01	1000000	4
IndivQLearningVarNearbyObs1/1625_162_5	none	True	0	True	GridWorld	MIT	NearbyObsDiscrete	Individual_Q	0.2	0.01	1000000	5
IndivQLearningVarNearbyObs1/1626_162_6	none	True	0	True	GridWorld	MIT	NearbyObsDiscrete	Individual_Q	0.2	0.01	1000000	6
IndivQLearningVarNearbyObs1/1627_162_7	none	True	0	True	GridWorld	MIT	NearbyObsDiscrete	Individual_Q	0.2	0.01	1000000	7
IndivQLearningVarNearbyObs1/1628_162_8	none	True	0	True	GridWorld	MIT	NearbyObsDiscrete	Individual_Q	0.2	0.01	1000000	8
IndivQLearningVarNearbyObs1/1629_162_9	none	True	0	True	GridWorld	MIT	NearbyObsDiscrete	Individual_Q	0.2	0.01	1000000	9
IndivQLearningVarNearbyObs1/1630_163_0	none	True	-10	True	GridWorld	MIT	NearbyObsDiscrete	Individual_Q	0.2	0.01	1000000	0
IndivQLearningVarNearbyObs1/1631_163_1	none	True	-10	True	GridWorld	MIT	NearbyObsDiscrete	Individual_Q	0.2	0.01	1000000	1
IndivQLearningVarNearbyObs1/1632_163_2	none	True	-10	True	GridWorld	MIT	NearbyObsDiscrete	Individual_Q	0.2	0.01	1000000	2
IndivQLearningVarNearbyObs1/1633_163_3	none	True	-10	True	GridWorld	MIT	NearbyObsDiscrete	Individual_Q	0.2	0.01	1000000	3
IndivQLearningVarNearbyObs1/1634_163_4	none	True	-10	True	GridWorld	MIT	NearbyObsDiscrete	Individual_Q	0.2	0.01	1000000	4
IndivQLearningVarNearbyObs1/1635_163_5	none	True	-10	True	GridWorld	MIT	NearbyObsDiscrete	Individual_Q	0.2	0.01	1000000	5
IndivQLearningVarNearbyObs1/1636_163_6	none	True	-10	True	GridWorld	MIT	NearbyObsDiscrete	Individual_Q	0.2	0.01	1000000	6
IndivQLearningVarNearbyObs1/1637_163_7	none	True	-10	True	GridWorld	MIT	NearbyObsDiscrete	Individual_Q	0.2	0.01	1000000	7
IndivQLearningVarNearbyObs1/1638_163_8	none	True	-10	True	GridWorld	MIT	NearbyObsDiscrete	Individual_Q	0.2	0.01	1000000	8
IndivQLearningVarNearbyObs1/1639_163_9	none	True	-10	True	GridWorld	MIT	NearbyObsDiscrete	Individual_Q	0.2	0.01	1000000	9
IndivQLearningVarNearbyObs1/1640_164_0	none	True	0	True	GridWorld	MIT	FullObsDiscrete	Individual_Q	0.2	0.2	1000000	0
IndivQLearningVarNearbyObs1/1641_164_1	none	True	0	True	GridWorld	MIT	FullObsDiscrete	Individual_Q	0.2	0.2	1000000	1
IndivQLearningVarNearbyObs1/1642_164_2	none	True	0	True	GridWorld	MIT	FullObsDiscrete	Individual_Q	0.2	0.2	1000000	2
IndivQLearningVarNearbyObs1/1643_164_3	none	True	0	True	GridWorld	MIT	FullObsDiscrete	Individual_Q	0.2	0.2	1000000	3
IndivQLearningVarNearbyObs1/1644_164_4	none	True	0	True	GridWorld	MIT	FullObsDiscrete	Individual_Q	0.2	0.2	1000000	4
IndivQLearningVarNearbyObs1/1645_164_5	none	True	0	True	GridWorld	MIT	FullObsDiscrete	Individual_Q	0.2	0.2	1000000	5
IndivQLearningVarNearbyObs1/1646_164_6	none	True	0	True	GridWorld	MIT	FullObsDiscrete	Individual_Q	0.2	0.2	1000000	6
IndivQLearningVarNearbyObs1/1647_164_7	none	True	0	True	GridWorld	MIT	FullObsDiscrete	Individual_Q	0.2	0.2	1000000	7
IndivQLearningVarNearbyObs1/1648_164_8	none	True	0	True	GridWorld	MIT	FullObsDiscrete	Individual_Q	0.2	0.2	1000000	8
IndivQLearningVarNearbyObs1/1649_164_9	none	True	0	True	GridWorld	MIT	FullObsDiscrete	Individual_Q	0.2	0.2	1000000	9
IndivQLearningVarNearbyObs1/1650_165_0	none	True	-10	True	GridWorld	MIT	FullObsDiscrete	Individual_Q	0.2	0.2	1000000	0
IndivQLearningVarNearbyObs1/1651_165_1	none	True	-10	True	GridWorld	MIT	FullObsDiscrete	Individual_Q	0.2	0.2	1000000	1
IndivQLearningVarNearbyObs1/1652_165_2	none	True	-10	True	GridWorld	MIT	FullObsDiscrete	Individual_Q	0.2	0.2	1000000	2
IndivQLearningVarNearbyObs1/1653_165_3	none	True	-10	True	GridWorld	MIT	FullObsDiscrete	Individual_Q	0.2	0.2	1000000	3
IndivQLearningVarNearbyObs1/1654_165_4	none	True	-10	True	GridWorld	MIT	FullObsDiscrete	Individual_Q	0.2	0.2	1000000	4
IndivQLearningVarNearbyObs1/1655_165_5	none	True	-10	True	GridWorld	MIT	FullObsDiscrete	Individual_Q	0.2	0.2	1000000	5
IndivQLearningVarNearbyObs1/1656_165_6	none	True	-10	True	GridWorld	MIT	FullObsDiscrete	Individual_Q	0.2	0.2	1000000	6
IndivQLearningVarNearbyObs1/1657_165_7	none	True	-10	True	GridWorld	MIT	FullObsDiscrete	Individual_Q	0.2	0.2	1000000	7
IndivQLearningVarNearbyObs1/1658_165_8	none	True	-10	True	GridWorld	MIT	FullObsDiscrete	Individual_Q	0.2	0.2	1000000	8
IndivQLearningVarNearbyObs1/1659_165_9	none	True	-10	True	GridWorld	MIT	FullObsDiscrete	Individual_Q	0.2	0.2	1000000	9
IndivQLearningVarNearbyObs1/1660_166_0	none	True	0	True	GridWorld	MIT	FullObsDiscrete	Individual_Q	0.2	0.01	1000000	0
IndivQLearningVarNearbyObs1/1661_166_1	none	True	0	True	GridWorld	MIT	FullObsDiscrete	Individual_Q	0.2	0.01	1000000	1
IndivQLearningVarNearbyObs1/1662_166_2	none	True	0	True	GridWorld	MIT	FullObsDiscrete	Individual_Q	0.2	0.01	1000000	2
IndivQLearningVarNearbyObs1/1663_166_3	none	True	0	True	GridWorld	MIT	FullObsDiscrete	Individual_Q	0.2	0.01	1000000	3
IndivQLearningVarNearbyObs1/1664_166_4	none	True	0	True	GridWorld	MIT	FullObsDiscrete	Individual_Q	0.2	0.01	1000000	4
IndivQLearningVarNearbyObs1/1665_166_5	none	True	0	True	GridWorld	MIT	FullObsDiscrete	Individual_Q	0.2	0.01	1000000	5
IndivQLearningVarNearbyObs1/1666_166_6	none	True	0	True	GridWorld	MIT	FullObsDiscrete	Individual_Q	0.2	0.01	1000000	6
IndivQLearningVarNearbyObs1/1667_166_7	none	True	0	True	GridWorld	MIT	FullObsDiscrete	Individual_Q	0.2	0.01	1000000	7
IndivQLearningVarNearbyObs1/1668_166_8	none	True	0	True	GridWorld	MIT	FullObsDiscrete	Individual_Q	0.2	0.01	1000000	8
IndivQLearningVarNearbyObs1/1669_166_9	none	True	0	True	GridWorld	MIT	FullObsDiscrete	Individual_Q	0.2	0.01	1000000	9
IndivQLearningVarNearbyObs1/1670_167_0	none	True	-10	True	GridWorld	MIT	FullObsDiscrete	Individual_Q	0.2	0.01	1000000	0
IndivQLearningVarNearbyObs1/1671_167_1	none	True	-10	True	GridWorld	MIT	FullObsDiscrete	Individual_Q	0.2	0.01	1000000	1
IndivQLearningVarNearbyObs1/1672_167_2	none	True	-10	True	GridWorld	MIT	FullObsDiscrete	Individual_Q	0.2	0.01	1000000	2
IndivQLearningVarNearbyObs1/1673_167_3	none	True	-10	True	GridWorld	MIT	FullObsDiscrete	Individual_Q	0.2	0.01	1000000	3
IndivQLearningVarNearbyObs1/1674_167_4	none	True	-10	True	GridWorld	MIT	FullObsDiscrete	Individual_Q	0.2	0.01	1000000	4
IndivQLearningVarNearbyObs1/1675_167_5	none	True	-10	True	GridWorld	MIT	FullObsDiscrete	Individual_Q	0.2	0.01	1000000	5
IndivQLearningVarNearbyObs1/1676_167_6	none	True	-10	True	GridWorld	MIT	FullObsDiscrete	Individual_Q	0.2	0.01	1000000	6
IndivQLearningVarNearbyObs1/1677_167_7	none	True	-10	True	GridWorld	MIT	FullObsDiscrete	Individual_Q	0.2	0.01	1000000	7
IndivQLearningVarNearbyObs1/1678_167_8	none	True	-10	True	GridWorld	MIT	FullObsDiscrete	Individual_Q	0.2	0.01	1000000	8
IndivQLearningVarNearbyObs1/1679_167_9	none	True	-10	True	GridWorld	MIT	FullObsDiscrete	Individual_Q	0.2	0.01	1000000	9
IndivQLearningVarNearbyObs1/1680_168_0	centralized	True	0	False	GridWorld	MIT	NearbyObsDiscrete	Individual_Q	0.2	0.2	1000000	0
IndivQLearningVarNearbyObs1/1681_168_1	centralized	True	0	False	GridWorld	MIT	NearbyObsDiscrete	Individual_Q	0.2	0.2	1000000	1
IndivQLearningVarNearbyObs1/1682_168_2	centralized	True	0	False	GridWorld	MIT	NearbyObsDiscrete	Individual_Q	0.2	0.2	1000000	2
IndivQLearningVarNearbyObs1/1683_168_3	centralized	True	0	False	GridWorld	MIT	NearbyObsDiscrete	Individual_Q	0.2	0.2	1000000	3
IndivQLearningVarNearbyObs1/1684_168_4	centralized	True	0	False	GridWorld	MIT	NearbyObsDiscrete	Individual_Q	0.2	0.2	1000000	4
IndivQLearningVarNearbyObs1/1685_168_5	centralized	True	0	False	GridWorld	MIT	NearbyObsDiscrete	Individual_Q	0.2	0.2	1000000	5
IndivQLearningVarNearbyObs1/1686_168_6	centralized	True	0	False	GridWorld	MIT	NearbyObsDiscrete	Individual_Q	0.2	0.2	1000000	6
IndivQLearningVarNearbyObs1/1687_168_7	centralized	True	0	False	GridWorld	MIT	NearbyObsDiscrete	Individual_Q	0.2	0.2	1000000	7
IndivQLearningVarNearbyObs1/1688_168_8	centralized	True	0	False	GridWorld	MIT	NearbyObsDiscrete	Individual_Q	0.2	0.2	1000000	8
IndivQLearningVarNearbyObs1/1689_168_9	centralized	True	0	False	GridWorld	MIT	NearbyObsDiscrete	Individual_Q	0.2	0.2	1000000	9
IndivQLearningVarNearbyObs1/1690_169_0	centralized	True	-10	False	GridWorld	MIT	NearbyObsDiscrete	Individual_Q	0.2	0.2	1000000	0
IndivQLearningVarNearbyObs1/1691_169_1	centralized	True	-10	False	GridWorld	MIT	NearbyObsDiscrete	Individual_Q	0.2	0.2	1000000	1
IndivQLearningVarNearbyObs1/1692_169_2	centralized	True	-10	False	GridWorld	MIT	NearbyObsDiscrete	Individual_Q	0.2	0.2	1000000	2
IndivQLearningVarNearbyObs1/1693_169_3	centralized	True	-10	False	GridWorld	MIT	NearbyObsDiscrete	Individual_Q	0.2	0.2	1000000	3
IndivQLearningVarNearbyObs1/1694_169_4	centralized	True	-10	False	GridWorld	MIT	NearbyObsDiscrete	Individual_Q	0.2	0.2	1000000	4
IndivQLearningVarNearbyObs1/1695_169_5	centralized	True	-10	False	GridWorld	MIT	NearbyObsDiscrete	Individual_Q	0.2	0.2	1000000	5
IndivQLearningVarNearbyObs1/1696_169_6	centralized	True	-10	False	GridWorld	MIT	NearbyObsDiscrete	Individual_Q	0.2	0.2	1000000	6
IndivQLearningVarNearbyObs1/1697_169_7	centralized	True	-10	False	GridWorld	MIT	NearbyObsDiscrete	Individual_Q	0.2	0.2	1000000	7
IndivQLearningVarNearbyObs1/1698_169_8	centralized	True	-10	False	GridWorld	MIT	NearbyObsDiscrete	Individual_Q	0.2	0.2	1000000	8
IndivQLearningVarNearbyObs1/1699_169_9	centralized	True	-10	False	GridWorld	MIT	NearbyObsDiscrete	Individual_Q	0.2	0.2	1000000	9
IndivQLearningVarNearbyObs1/1700_170_0	centralized	True	0	False	GridWorld	MIT	NearbyObsDiscrete	Individual_Q	0.2	0.01	1000000	0
IndivQLearningVarNearbyObs1/1701_170_1	centralized	True	0	False	GridWorld	MIT	NearbyObsDiscrete	Individual_Q	0.2	0.01	1000000	1
IndivQLearningVarNearbyObs1/1702_170_2	centralized	True	0	False	GridWorld	MIT	NearbyObsDiscrete	Individual_Q	0.2	0.01	1000000	2
IndivQLearningVarNearbyObs1/1703_170_3	centralized	True	0	False	GridWorld	MIT	NearbyObsDiscrete	Individual_Q	0.2	0.01	1000000	3
IndivQLearningVarNearbyObs1/1704_170_4	centralized	True	0	False	GridWorld	MIT	NearbyObsDiscrete	Individual_Q	0.2	0.01	1000000	4
IndivQLearningVarNearbyObs1/1705_170_5	centralized	True	0	False	GridWorld	MIT	NearbyObsDiscrete	Individual_Q	0.2	0.01	1000000	5
IndivQLearningVarNearbyObs1/1706_170_6	centralized	True	0	False	GridWorld	MIT	NearbyObsDiscrete	Individual_Q	0.2	0.01	1000000	6
IndivQLearningVarNearbyObs1/1707_170_7	centralized	True	0	False	GridWorld	MIT	NearbyObsDiscrete	Individual_Q	0.2	0.01	1000000	7
IndivQLearningVarNearbyObs1/1708_170_8	centralized	True	0	False	GridWorld	MIT	NearbyObsDiscrete	Individual_Q	0.2	0.01	1000000	8
IndivQLearningVarNearbyObs1/1709_170_9	centralized	True	0	False	GridWorld	MIT	NearbyObsDiscrete	Individual_Q	0.2	0.01	1000000	9
IndivQLearningVarNearbyObs1/1710_171_0	centralized	True	-10	False	GridWorld	MIT	NearbyObsDiscrete	Individual_Q	0.2	0.01	1000000	0
IndivQLearningVarNearbyObs1/1711_171_1	centralized	True	-10	False	GridWorld	MIT	NearbyObsDiscrete	Individual_Q	0.2	0.01	1000000	1
IndivQLearningVarNearbyObs1/1712_171_2	centralized	True	-10	False	GridWorld	MIT	NearbyObsDiscrete	Individual_Q	0.2	0.01	1000000	2
IndivQLearningVarNearbyObs1/1713_171_3	centralized	True	-10	False	GridWorld	MIT	NearbyObsDiscrete	Individual_Q	0.2	0.01	1000000	3
IndivQLearningVarNearbyObs1/1714_171_4	centralized	True	-10	False	GridWorld	MIT	NearbyObsDiscrete	Individual_Q	0.2	0.01	1000000	4
IndivQLearningVarNearbyObs1/1715_171_5	centralized	True	-10	False	GridWorld	MIT	NearbyObsDiscrete	Individual_Q	0.2	0.01	1000000	5
IndivQLearningVarNearbyObs1/1716_171_6	centralized	True	-10	False	GridWorld	MIT	NearbyObsDiscrete	Individual_Q	0.2	0.01	1000000	6
IndivQLearningVarNearbyObs1/1717_171_7	centralized	True	-10	False	GridWorld	MIT	NearbyObsDiscrete	Individual_Q	0.2	0.01	1000000	7
IndivQLearningVarNearbyObs1/1718_171_8	centralized	True	-10	False	GridWorld	MIT	NearbyObsDiscrete	Individual_Q	0.2	0.01	1000000	8
IndivQLearningVarNearbyObs1/1719_171_9	centralized	True	-10	False	GridWorld	MIT	NearbyObsDiscrete	Individual_Q	0.2	0.01	1000000	9
IndivQLearningVarNearbyObs1/1720_172_0	centralized	True	0	False	GridWorld	MIT	FullObsDiscrete	Individual_Q	0.2	0.2	1000000	0
IndivQLearningVarNearbyObs1/1721_172_1	centralized	True	0	False	GridWorld	MIT	FullObsDiscrete	Individual_Q	0.2	0.2	1000000	1
IndivQLearningVarNearbyObs1/1722_172_2	centralized	True	0	False	GridWorld	MIT	FullObsDiscrete	Individual_Q	0.2	0.2	1000000	2
IndivQLearningVarNearbyObs1/1723_172_3	centralized	True	0	False	GridWorld	MIT	FullObsDiscrete	Individual_Q	0.2	0.2	1000000	3
IndivQLearningVarNearbyObs1/1724_172_4	centralized	True	0	False	GridWorld	MIT	FullObsDiscrete	Individual_Q	0.2	0.2	1000000	4
IndivQLearningVarNearbyObs1/1725_172_5	centralized	True	0	False	GridWorld	MIT	FullObsDiscrete	Individual_Q	0.2	0.2	1000000	5
IndivQLearningVarNearbyObs1/1726_172_6	centralized	True	0	False	GridWorld	MIT	FullObsDiscrete	Individual_Q	0.2	0.2	1000000	6
IndivQLearningVarNearbyObs1/1727_172_7	centralized	True	0	False	GridWorld	MIT	FullObsDiscrete	Individual_Q	0.2	0.2	1000000	7
IndivQLearningVarNearbyObs1/1728_172_8	centralized	True	0	False	GridWorld	MIT	FullObsDiscrete	Individual_Q	0.2	0.2	1000000	8
IndivQLearningVarNearbyObs1/1729_172_9	centralized	True	0	False	GridWorld	MIT	FullObsDiscrete	Individual_Q	0.2	0.2	1000000	9
IndivQLearningVarNearbyObs1/1730_173_0	centralized	True	-10	False	GridWorld	MIT	FullObsDiscrete	Individual_Q	0.2	0.2	1000000	0
IndivQLearningVarNearbyObs1/1731_173_1	centralized	True	-10	False	GridWorld	MIT	FullObsDiscrete	Individual_Q	0.2	0.2	1000000	1
IndivQLearningVarNearbyObs1/1732_173_2	centralized	True	-10	False	GridWorld	MIT	FullObsDiscrete	Individual_Q	0.2	0.2	1000000	2
IndivQLearningVarNearbyObs1/1733_173_3	centralized	True	-10	False	GridWorld	MIT	FullObsDiscrete	Individual_Q	0.2	0.2	1000000	3
IndivQLearningVarNearbyObs1/1734_173_4	centralized	True	-10	False	GridWorld	MIT	FullObsDiscrete	Individual_Q	0.2	0.2	1000000	4
IndivQLearningVarNearbyObs1/1735_173_5	centralized	True	-10	False	GridWorld	MIT	FullObsDiscrete	Individual_Q	0.2	0.2	1000000	5
IndivQLearningVarNearbyObs1/1736_173_6	centralized	True	-10	False	GridWorld	MIT	FullObsDiscrete	Individual_Q	0.2	0.2	1000000	6
IndivQLearningVarNearbyObs1/1737_173_7	centralized	True	-10	False	GridWorld	MIT	FullObsDiscrete	Individual_Q	0.2	0.2	1000000	7
IndivQLearningVarNearbyObs1/1738_173_8	centralized	True	-10	False	GridWorld	MIT	FullObsDiscrete	Individual_Q	0.2	0.2	1000000	8
IndivQLearningVarNearbyObs1/1739_173_9	centralized	True	-10	False	GridWorld	MIT	FullObsDiscrete	Individual_Q	0.2	0.2	1000000	9
IndivQLearningVarNearbyObs1/1740_174_0	centralized	True	0	False	GridWorld	MIT	FullObsDiscrete	Individual_Q	0.2	0.01	1000000	0
IndivQLearningVarNearbyObs1/1741_174_1	centralized	True	0	False	GridWorld	MIT	FullObsDiscrete	Individual_Q	0.2	0.01	1000000	1
IndivQLearningVarNearbyObs1/1742_174_2	centralized	True	0	False	GridWorld	MIT	FullObsDiscrete	Individual_Q	0.2	0.01	1000000	2
IndivQLearningVarNearbyObs1/1743_174_3	centralized	True	0	False	GridWorld	MIT	FullObsDiscrete	Individual_Q	0.2	0.01	1000000	3
IndivQLearningVarNearbyObs1/1744_174_4	centralized	True	0	False	GridWorld	MIT	FullObsDiscrete	Individual_Q	0.2	0.01	1000000	4
IndivQLearningVarNearbyObs1/1745_174_5	centralized	True	0	False	GridWorld	MIT	FullObsDiscrete	Individual_Q	0.2	0.01	1000000	5
IndivQLearningVarNearbyObs1/1746_174_6	centralized	True	0	False	GridWorld	MIT	FullObsDiscrete	Individual_Q	0.2	0.01	1000000	6
IndivQLearningVarNearbyObs1/1747_174_7	centralized	True	0	False	GridWorld	MIT	FullObsDiscrete	Individual_Q	0.2	0.01	1000000	7
IndivQLearningVarNearbyObs1/1748_174_8	centralized	True	0	False	GridWorld	MIT	FullObsDiscrete	Individual_Q	0.2	0.01	1000000	8
IndivQLearningVarNearbyObs1/1749_174_9	centralized	True	0	False	GridWorld	MIT	FullObsDiscrete	Individual_Q	0.2	0.01	1000000	9
IndivQLearningVarNearbyObs1/1750_175_0	centralized	True	-10	False	GridWorld	MIT	FullObsDiscrete	Individual_Q	0.2	0.01	1000000	0
IndivQLearningVarNearbyObs1/1751_175_1	centralized	True	-10	False	GridWorld	MIT	FullObsDiscrete	Individual_Q	0.2	0.01	1000000	1
IndivQLearningVarNearbyObs1/1752_175_2	centralized	True	-10	False	GridWorld	MIT	FullObsDiscrete	Individual_Q	0.2	0.01	1000000	2
IndivQLearningVarNearbyObs1/1753_175_3	centralized	True	-10	False	GridWorld	MIT	FullObsDiscrete	Individual_Q	0.2	0.01	1000000	3
IndivQLearningVarNearbyObs1/1754_175_4	centralized	True	-10	False	GridWorld	MIT	FullObsDiscrete	Individual_Q	0.2	0.01	1000000	4
IndivQLearningVarNearbyObs1/1755_175_5	centralized	True	-10	False	GridWorld	MIT	FullObsDiscrete	Individual_Q	0.2	0.01	1000000	5
IndivQLearningVarNearbyObs1/1756_175_6	centralized	True	-10	False	GridWorld	MIT	FullObsDiscrete	Individual_Q	0.2	0.01	1000000	6
IndivQLearningVarNearbyObs1/1757_175_7	centralized	True	-10	False	GridWorld	MIT	FullObsDiscrete	Individual_Q	0.2	0.01	1000000	7
IndivQLearningVarNearbyObs1/1758_175_8	centralized	True	-10	False	GridWorld	MIT	FullObsDiscrete	Individual_Q	0.2	0.01	1000000	8
IndivQLearningVarNearbyObs1/1759_175_9	centralized	True	-10	False	GridWorld	MIT	FullObsDiscrete	Individual_Q	0.2	0.01	1000000	9
IndivQLearningVarNearbyObs1/1760_176_0	decentralized	True	0	False	GridWorld	MIT	NearbyObsDiscrete	Individual_Q	0.2	0.2	1000000	0
IndivQLearningVarNearbyObs1/1761_176_1	decentralized	True	0	False	GridWorld	MIT	NearbyObsDiscrete	Individual_Q	0.2	0.2	1000000	1
IndivQLearningVarNearbyObs1/1762_176_2	decentralized	True	0	False	GridWorld	MIT	NearbyObsDiscrete	Individual_Q	0.2	0.2	1000000	2
IndivQLearningVarNearbyObs1/1763_176_3	decentralized	True	0	False	GridWorld	MIT	NearbyObsDiscrete	Individual_Q	0.2	0.2	1000000	3
IndivQLearningVarNearbyObs1/1764_176_4	decentralized	True	0	False	GridWorld	MIT	NearbyObsDiscrete	Individual_Q	0.2	0.2	1000000	4
IndivQLearningVarNearbyObs1/1765_176_5	decentralized	True	0	False	GridWorld	MIT	NearbyObsDiscrete	Individual_Q	0.2	0.2	1000000	5
IndivQLearningVarNearbyObs1/1766_176_6	decentralized	True	0	False	GridWorld	MIT	NearbyObsDiscrete	Individual_Q	0.2	0.2	1000000	6
IndivQLearningVarNearbyObs1/1767_176_7	decentralized	True	0	False	GridWorld	MIT	NearbyObsDiscrete	Individual_Q	0.2	0.2	1000000	7
IndivQLearningVarNearbyObs1/1768_176_8	decentralized	True	0	False	GridWorld	MIT	NearbyObsDiscrete	Individual_Q	0.2	0.2	1000000	8
IndivQLearningVarNearbyObs1/1769_176_9	decentralized	True	0	False	GridWorld	MIT	NearbyObsDiscrete	Individual_Q	0.2	0.2	1000000	9
IndivQLearningVarNearbyObs1/1770_177_0	decentralized	True	-10	False	GridWorld	MIT	NearbyObsDiscrete	Individual_Q	0.2	0.2	1000000	0
IndivQLearningVarNearbyObs1/1771_177_1	decentralized	True	-10	False	GridWorld	MIT	NearbyObsDiscrete	Individual_Q	0.2	0.2	1000000	1
IndivQLearningVarNearbyObs1/1772_177_2	decentralized	True	-10	False	GridWorld	MIT	NearbyObsDiscrete	Individual_Q	0.2	0.2	1000000	2
IndivQLearningVarNearbyObs1/1773_177_3	decentralized	True	-10	False	GridWorld	MIT	NearbyObsDiscrete	Individual_Q	0.2	0.2	1000000	3
IndivQLearningVarNearbyObs1/1774_177_4	decentralized	True	-10	False	GridWorld	MIT	NearbyObsDiscrete	Individual_Q	0.2	0.2	1000000	4
IndivQLearningVarNearbyObs1/1775_177_5	decentralized	True	-10	False	GridWorld	MIT	NearbyObsDiscrete	Individual_Q	0.2	0.2	1000000	5
IndivQLearningVarNearbyObs1/1776_177_6	decentralized	True	-10	False	GridWorld	MIT	NearbyObsDiscrete	Individual_Q	0.2	0.2	1000000	6
IndivQLearningVarNearbyObs1/1777_177_7	decentralized	True	-10	False	GridWorld	MIT	NearbyObsDiscrete	Individual_Q	0.2	0.2	1000000	7
IndivQLearningVarNearbyObs1/1778_177_8	decentralized	True	-10	False	GridWorld	MIT	NearbyObsDiscrete	Individual_Q	0.2	0.2	1000000	8
IndivQLearningVarNearbyObs1/1779_177_9	decentralized	True	-10	False	GridWorld	MIT	NearbyObsDiscrete	Individual_Q	0.2	0.2	1000000	9
IndivQLearningVarNearbyObs1/1780_178_0	decentralized	True	0	False	GridWorld	MIT	NearbyObsDiscrete	Individual_Q	0.2	0.01	1000000	0
IndivQLearningVarNearbyObs1/1781_178_1	decentralized	True	0	False	GridWorld	MIT	NearbyObsDiscrete	Individual_Q	0.2	0.01	1000000	1
IndivQLearningVarNearbyObs1/1782_178_2	decentralized	True	0	False	GridWorld	MIT	NearbyObsDiscrete	Individual_Q	0.2	0.01	1000000	2
IndivQLearningVarNearbyObs1/1783_178_3	decentralized	True	0	False	GridWorld	MIT	NearbyObsDiscrete	Individual_Q	0.2	0.01	1000000	3
IndivQLearningVarNearbyObs1/1784_178_4	decentralized	True	0	False	GridWorld	MIT	NearbyObsDiscrete	Individual_Q	0.2	0.01	1000000	4
IndivQLearningVarNearbyObs1/1785_178_5	decentralized	True	0	False	GridWorld	MIT	NearbyObsDiscrete	Individual_Q	0.2	0.01	1000000	5
IndivQLearningVarNearbyObs1/1786_178_6	decentralized	True	0	False	GridWorld	MIT	NearbyObsDiscrete	Individual_Q	0.2	0.01	1000000	6
IndivQLearningVarNearbyObs1/1787_178_7	decentralized	True	0	False	GridWorld	MIT	NearbyObsDiscrete	Individual_Q	0.2	0.01	1000000	7
IndivQLearningVarNearbyObs1/1788_178_8	decentralized	True	0	False	GridWorld	MIT	NearbyObsDiscrete	Individual_Q	0.2	0.01	1000000	8
IndivQLearningVarNearbyObs1/1789_178_9	decentralized	True	0	False	GridWorld	MIT	NearbyObsDiscrete	Individual_Q	0.2	0.01	1000000	9
IndivQLearningVarNearbyObs1/1790_179_0	decentralized	True	-10	False	GridWorld	MIT	NearbyObsDiscrete	Individual_Q	0.2	0.01	1000000	0
IndivQLearningVarNearbyObs1/1791_179_1	decentralized	True	-10	False	GridWorld	MIT	NearbyObsDiscrete	Individual_Q	0.2	0.01	1000000	1
IndivQLearningVarNearbyObs1/1792_179_2	decentralized	True	-10	False	GridWorld	MIT	NearbyObsDiscrete	Individual_Q	0.2	0.01	1000000	2
IndivQLearningVarNearbyObs1/1793_179_3	decentralized	True	-10	False	GridWorld	MIT	NearbyObsDiscrete	Individual_Q	0.2	0.01	1000000	3
IndivQLearningVarNearbyObs1/1794_179_4	decentralized	True	-10	False	GridWorld	MIT	NearbyObsDiscrete	Individual_Q	0.2	0.01	1000000	4
IndivQLearningVarNearbyObs1/1795_179_5	decentralized	True	-10	False	GridWorld	MIT	NearbyObsDiscrete	Individual_Q	0.2	0.01	1000000	5
IndivQLearningVarNearbyObs1/1796_179_6	decentralized	True	-10	False	GridWorld	MIT	NearbyObsDiscrete	Individual_Q	0.2	0.01	1000000	6
IndivQLearningVarNearbyObs1/1797_179_7	decentralized	True	-10	False	GridWorld	MIT	NearbyObsDiscrete	Individual_Q	0.2	0.01	1000000	7
IndivQLearningVarNearbyObs1/1798_179_8	decentralized	True	-10	False	GridWorld	MIT	NearbyObsDiscrete	Individual_Q	0.2	0.01	1000000	8
IndivQLearningVarNearbyObs1/1799_179_9	decentralized	True	-10	False	GridWorld	MIT	NearbyObsDiscrete	Individual_Q	0.2	0.01	1000000	9
IndivQLearningVarNearbyObs1/1800_180_0	decentralized	True	0	False	GridWorld	MIT	FullObsDiscrete	Individual_Q	0.2	0.2	1000000	0
IndivQLearningVarNearbyObs1/1801_180_1	decentralized	True	0	False	GridWorld	MIT	FullObsDiscrete	Individual_Q	0.2	0.2	1000000	1
IndivQLearningVarNearbyObs1/1802_180_2	decentralized	True	0	False	GridWorld	MIT	FullObsDiscrete	Individual_Q	0.2	0.2	1000000	2
IndivQLearningVarNearbyObs1/1803_180_3	decentralized	True	0	False	GridWorld	MIT	FullObsDiscrete	Individual_Q	0.2	0.2	1000000	3
IndivQLearningVarNearbyObs1/1804_180_4	decentralized	True	0	False	GridWorld	MIT	FullObsDiscrete	Individual_Q	0.2	0.2	1000000	4
IndivQLearningVarNearbyObs1/1805_180_5	decentralized	True	0	False	GridWorld	MIT	FullObsDiscrete	Individual_Q	0.2	0.2	1000000	5
IndivQLearningVarNearbyObs1/1806_180_6	decentralized	True	0	False	GridWorld	MIT	FullObsDiscrete	Individual_Q	0.2	0.2	1000000	6
IndivQLearningVarNearbyObs1/1807_180_7	decentralized	True	0	False	GridWorld	MIT	FullObsDiscrete	Individual_Q	0.2	0.2	1000000	7
IndivQLearningVarNearbyObs1/1808_180_8	decentralized	True	0	False	GridWorld	MIT	FullObsDiscrete	Individual_Q	0.2	0.2	1000000	8
IndivQLearningVarNearbyObs1/1809_180_9	decentralized	True	0	False	GridWorld	MIT	FullObsDiscrete	Individual_Q	0.2	0.2	1000000	9
IndivQLearningVarNearbyObs1/1810_181_0	decentralized	True	-10	False	GridWorld	MIT	FullObsDiscrete	Individual_Q	0.2	0.2	1000000	0
IndivQLearningVarNearbyObs1/1811_181_1	decentralized	True	-10	False	GridWorld	MIT	FullObsDiscrete	Individual_Q	0.2	0.2	1000000	1
IndivQLearningVarNearbyObs1/1812_181_2	decentralized	True	-10	False	GridWorld	MIT	FullObsDiscrete	Individual_Q	0.2	0.2	1000000	2
IndivQLearningVarNearbyObs1/1813_181_3	decentralized	True	-10	False	GridWorld	MIT	FullObsDiscrete	Individual_Q	0.2	0.2	1000000	3
IndivQLearningVarNearbyObs1/1814_181_4	decentralized	True	-10	False	GridWorld	MIT	FullObsDiscrete	Individual_Q	0.2	0.2	1000000	4
IndivQLearningVarNearbyObs1/1815_181_5	decentralized	True	-10	False	GridWorld	MIT	FullObsDiscrete	Individual_Q	0.2	0.2	1000000	5
IndivQLearningVarNearbyObs1/1816_181_6	decentralized	True	-10	False	GridWorld	MIT	FullObsDiscrete	Individual_Q	0.2	0.2	1000000	6
IndivQLearningVarNearbyObs1/1817_181_7	decentralized	True	-10	False	GridWorld	MIT	FullObsDiscrete	Individual_Q	0.2	0.2	1000000	7
IndivQLearningVarNearbyObs1/1818_181_8	decentralized	True	-10	False	GridWorld	MIT	FullObsDiscrete	Individual_Q	0.2	0.2	1000000	8
IndivQLearningVarNearbyObs1/1819_181_9	decentralized	True	-10	False	GridWorld	MIT	FullObsDiscrete	Individual_Q	0.2	0.2	1000000	9
IndivQLearningVarNearbyObs1/1820_182_0	decentralized	True	0	False	GridWorld	MIT	FullObsDiscrete	Individual_Q	0.2	0.01	1000000	0
IndivQLearningVarNearbyObs1/1821_182_1	decentralized	True	0	False	GridWorld	MIT	FullObsDiscrete	Individual_Q	0.2	0.01	1000000	1
IndivQLearningVarNearbyObs1/1822_182_2	decentralized	True	0	False	GridWorld	MIT	FullObsDiscrete	Individual_Q	0.2	0.01	1000000	2
IndivQLearningVarNearbyObs1/1823_182_3	decentralized	True	0	False	GridWorld	MIT	FullObsDiscrete	Individual_Q	0.2	0.01	1000000	3
IndivQLearningVarNearbyObs1/1824_182_4	decentralized	True	0	False	GridWorld	MIT	FullObsDiscrete	Individual_Q	0.2	0.01	1000000	4
IndivQLearningVarNearbyObs1/1825_182_5	decentralized	True	0	False	GridWorld	MIT	FullObsDiscrete	Individual_Q	0.2	0.01	1000000	5
IndivQLearningVarNearbyObs1/1826_182_6	decentralized	True	0	False	GridWorld	MIT	FullObsDiscrete	Individual_Q	0.2	0.01	1000000	6
IndivQLearningVarNearbyObs1/1827_182_7	decentralized	True	0	False	GridWorld	MIT	FullObsDiscrete	Individual_Q	0.2	0.01	1000000	7
IndivQLearningVarNearbyObs1/1828_182_8	decentralized	True	0	False	GridWorld	MIT	FullObsDiscrete	Individual_Q	0.2	0.01	1000000	8
IndivQLearningVarNearbyObs1/1829_182_9	decentralized	True	0	False	GridWorld	MIT	FullObsDiscrete	Individual_Q	0.2	0.01	1000000	9
IndivQLearningVarNearbyObs1/1830_183_0	decentralized	True	-10	False	GridWorld	MIT	FullObsDiscrete	Individual_Q	0.2	0.01	1000000	0
IndivQLearningVarNearbyObs1/1831_183_1	decentralized	True	-10	False	GridWorld	MIT	FullObsDiscrete	Individual_Q	0.2	0.01	1000000	1
IndivQLearningVarNearbyObs1/1832_183_2	decentralized	True	-10	False	GridWorld	MIT	FullObsDiscrete	Individual_Q	0.2	0.01	1000000	2
IndivQLearningVarNearbyObs1/1833_183_3	decentralized	True	-10	False	GridWorld	MIT	FullObsDiscrete	Individual_Q	0.2	0.01	1000000	3
IndivQLearningVarNearbyObs1/1834_183_4	decentralized	True	-10	False	GridWorld	MIT	FullObsDiscrete	Individual_Q	0.2	0.01	1000000	4
IndivQLearningVarNearbyObs1/1835_183_5	decentralized	True	-10	False	GridWorld	MIT	FullObsDiscrete	Individual_Q	0.2	0.01	1000000	5
IndivQLearningVarNearbyObs1/1836_183_6	decentralized	True	-10	False	GridWorld	MIT	FullObsDiscrete	Individual_Q	0.2	0.01	1000000	6
IndivQLearningVarNearbyObs1/1837_183_7	decentralized	True	-10	False	GridWorld	MIT	FullObsDiscrete	Individual_Q	0.2	0.01	1000000	7
IndivQLearningVarNearbyObs1/1838_183_8	decentralized	True	-10	False	GridWorld	MIT	FullObsDiscrete	Individual_Q	0.2	0.01	1000000	8
IndivQLearningVarNearbyObs1/1839_183_9	decentralized	True	-10	False	GridWorld	MIT	FullObsDiscrete	Individual_Q	0.2	0.01	1000000	9
IndivQLearningVarNearbyObs1/1840_184_0	none	True	0	False	GridWorld	MIT	NearbyObsDiscrete	Individual_Q	0.2	0.2	1000000	0
IndivQLearningVarNearbyObs1/1841_184_1	none	True	0	False	GridWorld	MIT	NearbyObsDiscrete	Individual_Q	0.2	0.2	1000000	1
IndivQLearningVarNearbyObs1/1842_184_2	none	True	0	False	GridWorld	MIT	NearbyObsDiscrete	Individual_Q	0.2	0.2	1000000	2
IndivQLearningVarNearbyObs1/1843_184_3	none	True	0	False	GridWorld	MIT	NearbyObsDiscrete	Individual_Q	0.2	0.2	1000000	3
IndivQLearningVarNearbyObs1/1844_184_4	none	True	0	False	GridWorld	MIT	NearbyObsDiscrete	Individual_Q	0.2	0.2	1000000	4
IndivQLearningVarNearbyObs1/1845_184_5	none	True	0	False	GridWorld	MIT	NearbyObsDiscrete	Individual_Q	0.2	0.2	1000000	5
IndivQLearningVarNearbyObs1/1846_184_6	none	True	0	False	GridWorld	MIT	NearbyObsDiscrete	Individual_Q	0.2	0.2	1000000	6
IndivQLearningVarNearbyObs1/1847_184_7	none	True	0	False	GridWorld	MIT	NearbyObsDiscrete	Individual_Q	0.2	0.2	1000000	7
IndivQLearningVarNearbyObs1/1848_184_8	none	True	0	False	GridWorld	MIT	NearbyObsDiscrete	Individual_Q	0.2	0.2	1000000	8
IndivQLearningVarNearbyObs1/1849_184_9	none	True	0	False	GridWorld	MIT	NearbyObsDiscrete	Individual_Q	0.2	0.2	1000000	9
IndivQLearningVarNearbyObs1/1850_185_0	none	True	-10	False	GridWorld	MIT	NearbyObsDiscrete	Individual_Q	0.2	0.2	1000000	0
IndivQLearningVarNearbyObs1/1851_185_1	none	True	-10	False	GridWorld	MIT	NearbyObsDiscrete	Individual_Q	0.2	0.2	1000000	1
IndivQLearningVarNearbyObs1/1852_185_2	none	True	-10	False	GridWorld	MIT	NearbyObsDiscrete	Individual_Q	0.2	0.2	1000000	2
IndivQLearningVarNearbyObs1/1853_185_3	none	True	-10	False	GridWorld	MIT	NearbyObsDiscrete	Individual_Q	0.2	0.2	1000000	3
IndivQLearningVarNearbyObs1/1854_185_4	none	True	-10	False	GridWorld	MIT	NearbyObsDiscrete	Individual_Q	0.2	0.2	1000000	4
IndivQLearningVarNearbyObs1/1855_185_5	none	True	-10	False	GridWorld	MIT	NearbyObsDiscrete	Individual_Q	0.2	0.2	1000000	5
IndivQLearningVarNearbyObs1/1856_185_6	none	True	-10	False	GridWorld	MIT	NearbyObsDiscrete	Individual_Q	0.2	0.2	1000000	6
IndivQLearningVarNearbyObs1/1857_185_7	none	True	-10	False	GridWorld	MIT	NearbyObsDiscrete	Individual_Q	0.2	0.2	1000000	7
IndivQLearningVarNearbyObs1/1858_185_8	none	True	-10	False	GridWorld	MIT	NearbyObsDiscrete	Individual_Q	0.2	0.2	1000000	8
IndivQLearningVarNearbyObs1/1859_185_9	none	True	-10	False	GridWorld	MIT	NearbyObsDiscrete	Individual_Q	0.2	0.2	1000000	9
IndivQLearningVarNearbyObs1/1860_186_0	none	True	0	False	GridWorld	MIT	NearbyObsDiscrete	Individual_Q	0.2	0.01	1000000	0
IndivQLearningVarNearbyObs1/1861_186_1	none	True	0	False	GridWorld	MIT	NearbyObsDiscrete	Individual_Q	0.2	0.01	1000000	1
IndivQLearningVarNearbyObs1/1862_186_2	none	True	0	False	GridWorld	MIT	NearbyObsDiscrete	Individual_Q	0.2	0.01	1000000	2
IndivQLearningVarNearbyObs1/1863_186_3	none	True	0	False	GridWorld	MIT	NearbyObsDiscrete	Individual_Q	0.2	0.01	1000000	3
IndivQLearningVarNearbyObs1/1864_186_4	none	True	0	False	GridWorld	MIT	NearbyObsDiscrete	Individual_Q	0.2	0.01	1000000	4
IndivQLearningVarNearbyObs1/1865_186_5	none	True	0	False	GridWorld	MIT	NearbyObsDiscrete	Individual_Q	0.2	0.01	1000000	5
IndivQLearningVarNearbyObs1/1866_186_6	none	True	0	False	GridWorld	MIT	NearbyObsDiscrete	Individual_Q	0.2	0.01	1000000	6
IndivQLearningVarNearbyObs1/1867_186_7	none	True	0	False	GridWorld	MIT	NearbyObsDiscrete	Individual_Q	0.2	0.01	1000000	7
IndivQLearningVarNearbyObs1/1868_186_8	none	True	0	False	GridWorld	MIT	NearbyObsDiscrete	Individual_Q	0.2	0.01	1000000	8
IndivQLearningVarNearbyObs1/1869_186_9	none	True	0	False	GridWorld	MIT	NearbyObsDiscrete	Individual_Q	0.2	0.01	1000000	9
IndivQLearningVarNearbyObs1/1870_187_0	none	True	-10	False	GridWorld	MIT	NearbyObsDiscrete	Individual_Q	0.2	0.01	1000000	0
IndivQLearningVarNearbyObs1/1871_187_1	none	True	-10	False	GridWorld	MIT	NearbyObsDiscrete	Individual_Q	0.2	0.01	1000000	1
IndivQLearningVarNearbyObs1/1872_187_2	none	True	-10	False	GridWorld	MIT	NearbyObsDiscrete	Individual_Q	0.2	0.01	1000000	2
IndivQLearningVarNearbyObs1/1873_187_3	none	True	-10	False	GridWorld	MIT	NearbyObsDiscrete	Individual_Q	0.2	0.01	1000000	3
IndivQLearningVarNearbyObs1/1874_187_4	none	True	-10	False	GridWorld	MIT	NearbyObsDiscrete	Individual_Q	0.2	0.01	1000000	4
IndivQLearningVarNearbyObs1/1875_187_5	none	True	-10	False	GridWorld	MIT	NearbyObsDiscrete	Individual_Q	0.2	0.01	1000000	5
IndivQLearningVarNearbyObs1/1876_187_6	none	True	-10	False	GridWorld	MIT	NearbyObsDiscrete	Individual_Q	0.2	0.01	1000000	6
IndivQLearningVarNearbyObs1/1877_187_7	none	True	-10	False	GridWorld	MIT	NearbyObsDiscrete	Individual_Q	0.2	0.01	1000000	7
IndivQLearningVarNearbyObs1/1878_187_8	none	True	-10	False	GridWorld	MIT	NearbyObsDiscrete	Individual_Q	0.2	0.01	1000000	8
IndivQLearningVarNearbyObs1/1879_187_9	none	True	-10	False	GridWorld	MIT	NearbyObsDiscrete	Individual_Q	0.2	0.01	1000000	9
IndivQLearningVarNearbyObs1/1880_188_0	none	True	0	False	GridWorld	MIT	FullObsDiscrete	Individual_Q	0.2	0.2	1000000	0
IndivQLearningVarNearbyObs1/1881_188_1	none	True	0	False	GridWorld	MIT	FullObsDiscrete	Individual_Q	0.2	0.2	1000000	1
IndivQLearningVarNearbyObs1/1882_188_2	none	True	0	False	GridWorld	MIT	FullObsDiscrete	Individual_Q	0.2	0.2	1000000	2
IndivQLearningVarNearbyObs1/1883_188_3	none	True	0	False	GridWorld	MIT	FullObsDiscrete	Individual_Q	0.2	0.2	1000000	3
IndivQLearningVarNearbyObs1/1884_188_4	none	True	0	False	GridWorld	MIT	FullObsDiscrete	Individual_Q	0.2	0.2	1000000	4
IndivQLearningVarNearbyObs1/1885_188_5	none	True	0	False	GridWorld	MIT	FullObsDiscrete	Individual_Q	0.2	0.2	1000000	5
IndivQLearningVarNearbyObs1/1886_188_6	none	True	0	False	GridWorld	MIT	FullObsDiscrete	Individual_Q	0.2	0.2	1000000	6
IndivQLearningVarNearbyObs1/1887_188_7	none	True	0	False	GridWorld	MIT	FullObsDiscrete	Individual_Q	0.2	0.2	1000000	7
IndivQLearningVarNearbyObs1/1888_188_8	none	True	0	False	GridWorld	MIT	FullObsDiscrete	Individual_Q	0.2	0.2	1000000	8
IndivQLearningVarNearbyObs1/1889_188_9	none	True	0	False	GridWorld	MIT	FullObsDiscrete	Individual_Q	0.2	0.2	1000000	9
IndivQLearningVarNearbyObs1/1890_189_0	none	True	-10	False	GridWorld	MIT	FullObsDiscrete	Individual_Q	0.2	0.2	1000000	0
IndivQLearningVarNearbyObs1/1891_189_1	none	True	-10	False	GridWorld	MIT	FullObsDiscrete	Individual_Q	0.2	0.2	1000000	1
IndivQLearningVarNearbyObs1/1892_189_2	none	True	-10	False	GridWorld	MIT	FullObsDiscrete	Individual_Q	0.2	0.2	1000000	2
IndivQLearningVarNearbyObs1/1893_189_3	none	True	-10	False	GridWorld	MIT	FullObsDiscrete	Individual_Q	0.2	0.2	1000000	3
IndivQLearningVarNearbyObs1/1894_189_4	none	True	-10	False	GridWorld	MIT	FullObsDiscrete	Individual_Q	0.2	0.2	1000000	4
IndivQLearningVarNearbyObs1/1895_189_5	none	True	-10	False	GridWorld	MIT	FullObsDiscrete	Individual_Q	0.2	0.2	1000000	5
IndivQLearningVarNearbyObs1/1896_189_6	none	True	-10	False	GridWorld	MIT	FullObsDiscrete	Individual_Q	0.2	0.2	1000000	6
IndivQLearningVarNearbyObs1/1897_189_7	none	True	-10	False	GridWorld	MIT	FullObsDiscrete	Individual_Q	0.2	0.2	1000000	7
IndivQLearningVarNearbyObs1/1898_189_8	none	True	-10	False	GridWorld	MIT	FullObsDiscrete	Individual_Q	0.2	0.2	1000000	8
IndivQLearningVarNearbyObs1/1899_189_9	none	True	-10	False	GridWorld	MIT	FullObsDiscrete	Individual_Q	0.2	0.2	1000000	9
IndivQLearningVarNearbyObs1/1900_190_0	none	True	0	False	GridWorld	MIT	FullObsDiscrete	Individual_Q	0.2	0.01	1000000	0
IndivQLearningVarNearbyObs1/1901_190_1	none	True	0	False	GridWorld	MIT	FullObsDiscrete	Individual_Q	0.2	0.01	1000000	1
IndivQLearningVarNearbyObs1/1902_190_2	none	True	0	False	GridWorld	MIT	FullObsDiscrete	Individual_Q	0.2	0.01	1000000	2
IndivQLearningVarNearbyObs1/1903_190_3	none	True	0	False	GridWorld	MIT	FullObsDiscrete	Individual_Q	0.2	0.01	1000000	3
IndivQLearningVarNearbyObs1/1904_190_4	none	True	0	False	GridWorld	MIT	FullObsDiscrete	Individual_Q	0.2	0.01	1000000	4
IndivQLearningVarNearbyObs1/1905_190_5	none	True	0	False	GridWorld	MIT	FullObsDiscrete	Individual_Q	0.2	0.01	1000000	5
IndivQLearningVarNearbyObs1/1906_190_6	none	True	0	False	GridWorld	MIT	FullObsDiscrete	Individual_Q	0.2	0.01	1000000	6
IndivQLearningVarNearbyObs1/1907_190_7	none	True	0	False	GridWorld	MIT	FullObsDiscrete	Individual_Q	0.2	0.01	1000000	7
IndivQLearningVarNearbyObs1/1908_190_8	none	True	0	False	GridWorld	MIT	FullObsDiscrete	Individual_Q	0.2	0.01	1000000	8
IndivQLearningVarNearbyObs1/1909_190_9	none	True	0	False	GridWorld	MIT	FullObsDiscrete	Individual_Q	0.2	0.01	1000000	9
IndivQLearningVarNearbyObs1/1910_191_0	none	True	-10	False	GridWorld	MIT	FullObsDiscrete	Individual_Q	0.2	0.01	1000000	0
IndivQLearningVarNearbyObs1/1911_191_1	none	True	-10	False	GridWorld	MIT	FullObsDiscrete	Individual_Q	0.2	0.01	1000000	1
IndivQLearningVarNearbyObs1/1912_191_2	none	True	-10	False	GridWorld	MIT	FullObsDiscrete	Individual_Q	0.2	0.01	1000000	2
IndivQLearningVarNearbyObs1/1913_191_3	none	True	-10	False	GridWorld	MIT	FullObsDiscrete	Individual_Q	0.2	0.01	1000000	3
IndivQLearningVarNearbyObs1/1914_191_4	none	True	-10	False	GridWorld	MIT	FullObsDiscrete	Individual_Q	0.2	0.01	1000000	4
IndivQLearningVarNearbyObs1/1915_191_5	none	True	-10	False	GridWorld	MIT	FullObsDiscrete	Individual_Q	0.2	0.01	1000000	5
IndivQLearningVarNearbyObs1/1916_191_6	none	True	-10	False	GridWorld	MIT	FullObsDiscrete	Individual_Q	0.2	0.01	1000000	6
IndivQLearningVarNearbyObs1/1917_191_7	none	True	-10	False	GridWorld	MIT	FullObsDiscrete	Individual_Q	0.2	0.01	1000000	7
IndivQLearningVarNearbyObs1/1918_191_8	none	True	-10	False	GridWorld	MIT	FullObsDiscrete	Individual_Q	0.2	0.01	1000000	8
IndivQLearningVarNearbyObs1/1919_191_9	none	True	-10	False	GridWorld	MIT	FullObsDiscrete	Individual_Q	0.2	0.01	1000000	9
