# Supplementary material
Source: ML conference proceedings conference paper supplement (https://proceedings.neurips.cc/paper_files/paper/2022/hash/57444e14ecd9e2c8f603b4f012ce3811-Abstract.html)
Supplement: Supplementary file 1 [file 57444e14ecd9e2c8f603b4f012ce3811-Supplemental-Conference.zip › 3410_shield_decentralization_for_sa-Supplementary Material/parallel_configs/IndivQLearningVarOneEach.csv]

run_name	shield	punish_unsafe_orig_action	punish_unsafe_orig_action_modifier	randomize_starts	map_type	grid_world_map_name	grid_world_obs_type	learner_type	learner_anneal_eps_start	learner_anneal_eps_finish	max_total_steps
IndivQLearningVarOneEach/0_0_0	centralized	False	0	True	GridWorld	Pentagon	PartialObsDiscrete	Individual_Q	0.2	0.2	1000000
IndivQLearningVarOneEach/1_1_0	centralized	True	-10	True	GridWorld	Pentagon	PartialObsDiscrete	Individual_Q	0.2	0.2	1000000
IndivQLearningVarOneEach/2_2_0	centralized	True	-100	True	GridWorld	Pentagon	PartialObsDiscrete	Individual_Q	0.2	0.2	1000000
IndivQLearningVarOneEach/3_3_0	centralized	False	0	True	GridWorld	Pentagon	PartialObsDiscrete	Individual_Q	0.2	0.01	1000000
IndivQLearningVarOneEach/4_4_0	centralized	True	-10	True	GridWorld	Pentagon	PartialObsDiscrete	Individual_Q	0.2	0.01	1000000
IndivQLearningVarOneEach/5_5_0	centralized	True	-100	True	GridWorld	Pentagon	PartialObsDiscrete	Individual_Q	0.2	0.01	1000000
IndivQLearningVarOneEach/6_6_0	centralized	False	0	True	GridWorld	Pentagon	FullObsDiscrete	Individual_Q	0.2	0.2	1000000
IndivQLearningVarOneEach/7_7_0	centralized	True	-10	True	GridWorld	Pentagon	FullObsDiscrete	Individual_Q	0.2	0.2	1000000
IndivQLearningVarOneEach/8_8_0	centralized	True	-100	True	GridWorld	Pentagon	FullObsDiscrete	Individual_Q	0.2	0.2	1000000
IndivQLearningVarOneEach/9_9_0	centralized	False	0	True	GridWorld	Pentagon	FullObsDiscrete	Individual_Q	0.2	0.01	1000000
IndivQLearningVarOneEach/10_10_0	centralized	True	-10	True	GridWorld	Pentagon	FullObsDiscrete	Individual_Q	0.2	0.01	1000000
IndivQLearningVarOneEach/11_11_0	centralized	True	-100	True	GridWorld	Pentagon	FullObsDiscrete	Individual_Q	0.2	0.01	1000000
IndivQLearningVarOneEach/12_12_0	decentralized	False	0	True	GridWorld	Pentagon	PartialObsDiscrete	Individual_Q	0.2	0.2	1000000
IndivQLearningVarOneEach/13_13_0	decentralized	True	-10	True	GridWorld	Pentagon	PartialObsDiscrete	Individual_Q	0.2	0.2	1000000
IndivQLearningVarOneEach/14_14_0	decentralized	True	-100	True	GridWorld	Pentagon	PartialObsDiscrete	Individual_Q	0.2	0.2	1000000
IndivQLearningVarOneEach/15_15_0	decentralized	False	0	True	GridWorld	Pentagon	PartialObsDiscrete	Individual_Q	0.2	0.01	1000000
IndivQLearningVarOneEach/16_16_0	decentralized	True	-10	True	GridWorld	Pentagon	PartialObsDiscrete	Individual_Q	0.2	0.01	1000000
IndivQLearningVarOneEach/17_17_0	decentralized	True	-100	True	GridWorld	Pentagon	PartialObsDiscrete	Individual_Q	0.2	0.01	1000000
IndivQLearningVarOneEach/18_18_0	decentralized	False	0	True	GridWorld	Pentagon	FullObsDiscrete	Individual_Q	0.2	0.2	1000000
IndivQLearningVarOneEach/19_19_0	decentralized	True	-10	True	GridWorld	Pentagon	FullObsDiscrete	Individual_Q	0.2	0.2	1000000
IndivQLearningVarOneEach/20_20_0	decentralized	True	-100	True	GridWorld	Pentagon	FullObsDiscrete	Individual_Q	0.2	0.2	1000000
IndivQLearningVarOneEach/21_21_0	decentralized	False	0	True	GridWorld	Pentagon	FullObsDiscrete	Individual_Q	0.2	0.01	1000000
IndivQLearningVarOneEach/22_22_0	decentralized	True	-10	True	GridWorld	Pentagon	FullObsDiscrete	Individual_Q	0.2	0.01	1000000
IndivQLearningVarOneEach/23_23_0	decentralized	True	-100	True	GridWorld	Pentagon	FullObsDiscrete	Individual_Q	0.2	0.01	1000000
IndivQLearningVarOneEach/24_24_0	none	False	0	True	GridWorld	Pentagon	PartialObsDiscrete	Individual_Q	0.2	0.2	1000000
IndivQLearningVarOneEach/25_25_0	none	True	-10	True	GridWorld	Pentagon	PartialObsDiscrete	Individual_Q	0.2	0.2	1000000
IndivQLearningVarOneEach/26_26_0	none	True	-100	True	GridWorld	Pentagon	PartialObsDiscrete	Individual_Q	0.2	0.2	1000000
IndivQLearningVarOneEach/27_27_0	none	False	0	True	GridWorld	Pentagon	PartialObsDiscrete	Individual_Q	0.2	0.01	1000000
IndivQLearningVarOneEach/28_28_0	none	True	-10	True	GridWorld	Pentagon	PartialObsDiscrete	Individual_Q	0.2	0.01	1000000
IndivQLearningVarOneEach/29_29_0	none	True	-100	True	GridWorld	Pentagon	PartialObsDiscrete	Individual_Q	0.2	0.01	1000000
IndivQLearningVarOneEach/30_30_0	none	False	0	True	GridWorld	Pentagon	FullObsDiscrete	Individual_Q	0.2	0.2	1000000
IndivQLearningVarOneEach/31_31_0	none	True	-10	True	GridWorld	Pentagon	FullObsDiscrete	Individual_Q	0.2	0.2	1000000
IndivQLearningVarOneEach/32_32_0	none	True	-100	True	GridWorld	Pentagon	FullObsDiscrete	Individual_Q	0.2	0.2	1000000
IndivQLearningVarOneEach/33_33_0	none	False	0	True	GridWorld	Pentagon	FullObsDiscrete	Individual_Q	0.2	0.01	1000000
IndivQLearningVarOneEach/34_34_0	none	True	-10	True	GridWorld	Pentagon	FullObsDiscrete	Individual_Q	0.2	0.01	1000000
IndivQLearningVarOneEach/35_35_0	none	True	-100	True	GridWorld	Pentagon	FullObsDiscrete	Individual_Q	0.2	0.01	1000000
IndivQLearningVarOneEach/36_36_0	centralized	False	0	False	GridWorld	Pentagon	PartialObsDiscrete	Individual_Q	0.2	0.2	1000000
IndivQLearningVarOneEach/37_37_0	centralized	True	-10	False	GridWorld	Pentagon	PartialObsDiscrete	Individual_Q	0.2	0.2	1000000
IndivQLearningVarOneEach/38_38_0	centralized	True	-100	False	GridWorld	Pentagon	PartialObsDiscrete	Individual_Q	0.2	0.2	1000000
IndivQLearningVarOneEach/39_39_0	centralized	False	0	False	GridWorld	Pentagon	PartialObsDiscrete	Individual_Q	0.2	0.01	1000000
IndivQLearningVarOneEach/40_40_0	centralized	True	-10	False	GridWorld	Pentagon	PartialObsDiscrete	Individual_Q	0.2	0.01	1000000
IndivQLearningVarOneEach/41_41_0	centralized	True	-100	False	GridWorld	Pentagon	PartialObsDiscrete	Individual_Q	0.2	0.01	1000000
IndivQLearningVarOneEach/42_42_0	centralized	False	0	False	GridWorld	Pentagon	FullObsDiscrete	Individual_Q	0.2	0.2	1000000
IndivQLearningVarOneEach/43_43_0	centralized	True	-10	False	GridWorld	Pentagon	FullObsDiscrete	Individual_Q	0.2	0.2	1000000
IndivQLearningVarOneEach/44_44_0	centralized	True	-100	False	GridWorld	Pentagon	FullObsDiscrete	Individual_Q	0.2	0.2	1000000
IndivQLearningVarOneEach/45_45_0	centralized	False	0	False	GridWorld	Pentagon	FullObsDiscrete	Individual_Q	0.2	0.01	1000000
IndivQLearningVarOneEach/46_46_0	centralized	True	-10	False	GridWorld	Pentagon	FullObsDiscrete	Individual_Q	0.2	0.01	1000000
IndivQLearningVarOneEach/47_47_0	centralized	True	-100	False	GridWorld	Pentagon	FullObsDiscrete	Individual_Q	0.2	0.01	1000000
IndivQLearningVarOneEach/48_48_0	decentralized	False	0	False	GridWorld	Pentagon	PartialObsDiscrete	Individual_Q	0.2	0.2	1000000
IndivQLearningVarOneEach/49_49_0	decentralized	True	-10	False	GridWorld	Pentagon	PartialObsDiscrete	Individual_Q	0.2	0.2	1000000
IndivQLearningVarOneEach/50_50_0	decentralized	True	-100	False	GridWorld	Pentagon	PartialObsDiscrete	Individual_Q	0.2	0.2	1000000
IndivQLearningVarOneEach/51_51_0	decentralized	False	0	False	GridWorld	Pentagon	PartialObsDiscrete	Individual_Q	0.2	0.01	1000000
IndivQLearningVarOneEach/52_52_0	decentralized	True	-10	False	GridWorld	Pentagon	PartialObsDiscrete	Individual_Q	0.2	0.01	1000000
IndivQLearningVarOneEach/53_53_0	decentralized	True	-100	False	GridWorld	Pentagon	PartialObsDiscrete	Individual_Q	0.2	0.01	1000000
IndivQLearningVarOneEach/54_54_0	decentralized	False	0	False	GridWorld	Pentagon	FullObsDiscrete	Individual_Q	0.2	0.2	1000000
IndivQLearningVarOneEach/55_55_0	decentralized	True	-10	False	GridWorld	Pentagon	FullObsDiscrete	Individual_Q	0.2	0.2	1000000
IndivQLearningVarOneEach/56_56_0	decentralized	True	-100	False	GridWorld	Pentagon	FullObsDiscrete	Individual_Q	0.2	0.2	1000000
IndivQLearningVarOneEach/57_57_0	decentralized	False	0	False	GridWorld	Pentagon	FullObsDiscrete	Individual_Q	0.2	0.01	1000000
IndivQLearningVarOneEach/58_58_0	decentralized	True	-10	False	GridWorld	Pentagon	FullObsDiscrete	Individual_Q	0.2	0.01	1000000
IndivQLearningVarOneEach/59_59_0	decentralized	True	-100	False	GridWorld	Pentagon	FullObsDiscrete	Individual_Q	0.2	0.01	1000000
IndivQLearningVarOneEach/60_60_0	none	False	0	False	GridWorld	Pentagon	PartialObsDiscrete	Individual_Q	0.2	0.2	1000000
IndivQLearningVarOneEach/61_61_0	none	True	-10	False	GridWorld	Pentagon	PartialObsDiscrete	Individual_Q	0.2	0.2	1000000
IndivQLearningVarOneEach/62_62_0	none	True	-100	False	GridWorld	Pentagon	PartialObsDiscrete	Individual_Q	0.2	0.2	1000000
IndivQLearningVarOneEach/63_63_0	none	False	0	False	GridWorld	Pentagon	PartialObsDiscrete	Individual_Q	0.2	0.01	1000000
IndivQLearningVarOneEach/64_64_0	none	True	-10	False	GridWorld	Pentagon	PartialObsDiscrete	Individual_Q	0.2	0.01	1000000
IndivQLearningVarOneEach/65_65_0	none	True	-100	False	GridWorld	Pentagon	PartialObsDiscrete	Individual_Q	0.2	0.01	1000000
IndivQLearningVarOneEach/66_66_0	none	False	0	False	GridWorld	Pentagon	FullObsDiscrete	Individual_Q	0.2	0.2	1000000
IndivQLearningVarOneEach/67_67_0	none	True	-10	False	GridWorld	Pentagon	FullObsDiscrete	Individual_Q	0.2	0.2	1000000
IndivQLearningVarOneEach/68_68_0	none	True	-100	False	GridWorld	Pentagon	FullObsDiscrete	Individual_Q	0.2	0.2	1000000
IndivQLearningVarOneEach/69_69_0	none	False	0	False	GridWorld	Pentagon	FullObsDiscrete	Individual_Q	0.2	0.01	1000000
IndivQLearningVarOneEach/70_70_0	none	True	-10	False	GridWorld	Pentagon	FullObsDiscrete	Individual_Q	0.2	0.01	1000000
IndivQLearningVarOneEach/71_71_0	none	True	-100	False	GridWorld	Pentagon	FullObsDiscrete	Individual_Q	0.2	0.01	1000000
IndivQLearningVarOneEach/72_72_0	centralized	False	0	True	GridWorld	ISR	PartialObsDiscrete	Individual_Q	0.2	0.2	1000000
IndivQLearningVarOneEach/73_73_0	centralized	True	-10	True	GridWorld	ISR	PartialObsDiscrete	Individual_Q	0.2	0.2	1000000
IndivQLearningVarOneEach/74_74_0	centralized	True	-100	True	GridWorld	ISR	PartialObsDiscrete	Individual_Q	0.2	0.2	1000000
IndivQLearningVarOneEach/75_75_0	centralized	False	0	True	GridWorld	ISR	PartialObsDiscrete	Individual_Q	0.2	0.01	1000000
IndivQLearningVarOneEach/76_76_0	centralized	True	-10	True	GridWorld	ISR	PartialObsDiscrete	Individual_Q	0.2	0.01	1000000
IndivQLearningVarOneEach/77_77_0	centralized	True	-100	True	GridWorld	ISR	PartialObsDiscrete	Individual_Q	0.2	0.01	1000000
IndivQLearningVarOneEach/78_78_0	centralized	False	0	True	GridWorld	ISR	FullObsDiscrete	Individual_Q	0.2	0.2	1000000
IndivQLearningVarOneEach/79_79_0	centralized	True	-10	True	GridWorld	ISR	FullObsDiscrete	Individual_Q	0.2	0.2	1000000
IndivQLearningVarOneEach/80_80_0	centralized	True	-100	True	GridWorld	ISR	FullObsDiscrete	Individual_Q	0.2	0.2	1000000
IndivQLearningVarOneEach/81_81_0	centralized	False	0	True	GridWorld	ISR	FullObsDiscrete	Individual_Q	0.2	0.01	1000000
IndivQLearningVarOneEach/82_82_0	centralized	True	-10	True	GridWorld	ISR	FullObsDiscrete	Individual_Q	0.2	0.01	1000000
IndivQLearningVarOneEach/83_83_0	centralized	True	-100	True	GridWorld	ISR	FullObsDiscrete	Individual_Q	0.2	0.01	1000000
IndivQLearningVarOneEach/84_84_0	decentralized	False	0	True	GridWorld	ISR	PartialObsDiscrete	Individual_Q	0.2	0.2	1000000
IndivQLearningVarOneEach/85_85_0	decentralized	True	-10	True	GridWorld	ISR	PartialObsDiscrete	Individual_Q	0.2	0.2	1000000
IndivQLearningVarOneEach/86_86_0	decentralized	True	-100	True	GridWorld	ISR	PartialObsDiscrete	Individual_Q	0.2	0.2	1000000
IndivQLearningVarOneEach/87_87_0	decentralized	False	0	True	GridWorld	ISR	PartialObsDiscrete	Individual_Q	0.2	0.01	1000000
IndivQLearningVarOneEach/88_88_0	decentralized	True	-10	True	GridWorld	ISR	PartialObsDiscrete	Individual_Q	0.2	0.01	1000000
IndivQLearningVarOneEach/89_89_0	decentralized	True	-100	True	GridWorld	ISR	PartialObsDiscrete	Individual_Q	0.2	0.01	1000000
IndivQLearningVarOneEach/90_90_0	decentralized	False	0	True	GridWorld	ISR	FullObsDiscrete	Individual_Q	0.2	0.2	1000000
IndivQLearningVarOneEach/91_91_0	decentralized	True	-10	True	GridWorld	ISR	FullObsDiscrete	Individual_Q	0.2	0.2	1000000
IndivQLearningVarOneEach/92_92_0	decentralized	True	-100	True	GridWorld	ISR	FullObsDiscrete	Individual_Q	0.2	0.2	1000000
IndivQLearningVarOneEach/93_93_0	decentralized	False	0	True	GridWorld	ISR	FullObsDiscrete	Individual_Q	0.2	0.01	1000000
IndivQLearningVarOneEach/94_94_0	decentralized	True	-10	True	GridWorld	ISR	FullObsDiscrete	Individual_Q	0.2	0.01	1000000
IndivQLearningVarOneEach/95_95_0	decentralized	True	-100	True	GridWorld	ISR	FullObsDiscrete	Individual_Q	0.2	0.01	1000000
IndivQLearningVarOneEach/96_96_0	none	False	0	True	GridWorld	ISR	PartialObsDiscrete	Individual_Q	0.2	0.2	1000000
IndivQLearningVarOneEach/97_97_0	none	True	-10	True	GridWorld	ISR	PartialObsDiscrete	Individual_Q	0.2	0.2	1000000
IndivQLearningVarOneEach/98_98_0	none	True	-100	True	GridWorld	ISR	PartialObsDiscrete	Individual_Q	0.2	0.2	1000000
IndivQLearningVarOneEach/99_99_0	none	False	0	True	GridWorld	ISR	PartialObsDiscrete	Individual_Q	0.2	0.01	1000000
IndivQLearningVarOneEach/100_100_0	none	True	-10	True	GridWorld	ISR	PartialObsDiscrete	Individual_Q	0.2	0.01	1000000
IndivQLearningVarOneEach/101_101_0	none	True	-100	True	GridWorld	ISR	PartialObsDiscrete	Individual_Q	0.2	0.01	1000000
IndivQLearningVarOneEach/102_102_0	none	False	0	True	GridWorld	ISR	FullObsDiscrete	Individual_Q	0.2	0.2	1000000
IndivQLearningVarOneEach/103_103_0	none	True	-10	True	GridWorld	ISR	FullObsDiscrete	Individual_Q	0.2	0.2	1000000
IndivQLearningVarOneEach/104_104_0	none	True	-100	True	GridWorld	ISR	FullObsDiscrete	Individual_Q	0.2	0.2	1000000
IndivQLearningVarOneEach/105_105_0	none	False	0	True	GridWorld	ISR	FullObsDiscrete	Individual_Q	0.2	0.01	1000000
IndivQLearningVarOneEach/106_106_0	none	True	-10	True	GridWorld	ISR	FullObsDiscrete	Individual_Q	0.2	0.01	1000000
IndivQLearningVarOneEach/107_107_0	none	True	-100	True	GridWorld	ISR	FullObsDiscrete	Individual_Q	0.2	0.01	1000000
IndivQLearningVarOneEach/108_108_0	centralized	False	0	False	GridWorld	ISR	PartialObsDiscrete	Individual_Q	0.2	0.2	1000000
IndivQLearningVarOneEach/109_109_0	centralized	True	-10	False	GridWorld	ISR	PartialObsDiscrete	Individual_Q	0.2	0.2	1000000
IndivQLearningVarOneEach/110_110_0	centralized	True	-100	False	GridWorld	ISR	PartialObsDiscrete	Individual_Q	0.2	0.2	1000000
IndivQLearningVarOneEach/111_111_0	centralized	False	0	False	GridWorld	ISR	PartialObsDiscrete	Individual_Q	0.2	0.01	1000000
IndivQLearningVarOneEach/112_112_0	centralized	True	-10	False	GridWorld	ISR	PartialObsDiscrete	Individual_Q	0.2	0.01	1000000
IndivQLearningVarOneEach/113_113_0	centralized	True	-100	False	GridWorld	ISR	PartialObsDiscrete	Individual_Q	0.2	0.01	1000000
IndivQLearningVarOneEach/114_114_0	centralized	False	0	False	GridWorld	ISR	FullObsDiscrete	Individual_Q	0.2	0.2	1000000
IndivQLearningVarOneEach/115_115_0	centralized	True	-10	False	GridWorld	ISR	FullObsDiscrete	Individual_Q	0.2	0.2	1000000
IndivQLearningVarOneEach/116_116_0	centralized	True	-100	False	GridWorld	ISR	FullObsDiscrete	Individual_Q	0.2	0.2	1000000
IndivQLearningVarOneEach/117_117_0	centralized	False	0	False	GridWorld	ISR	FullObsDiscrete	Individual_Q	0.2	0.01	1000000
IndivQLearningVarOneEach/118_118_0	centralized	True	-10	False	GridWorld	ISR	FullObsDiscrete	Individual_Q	0.2	0.01	1000000
IndivQLearningVarOneEach/119_119_0	centralized	True	-100	False	GridWorld	ISR	FullObsDiscrete	Individual_Q	0.2	0.01	1000000
IndivQLearningVarOneEach/120_120_0	decentralized	False	0	False	GridWorld	ISR	PartialObsDiscrete	Individual_Q	0.2	0.2	1000000
IndivQLearningVarOneEach/121_121_0	decentralized	True	-10	False	GridWorld	ISR	PartialObsDiscrete	Individual_Q	0.2	0.2	1000000
IndivQLearningVarOneEach/122_122_0	decentralized	True	-100	False	GridWorld	ISR	PartialObsDiscrete	Individual_Q	0.2	0.2	1000000
IndivQLearningVarOneEach/123_123_0	decentralized	False	0	False	GridWorld	ISR	PartialObsDiscrete	Individual_Q	0.2	0.01	1000000
IndivQLearningVarOneEach/124_124_0	decentralized	True	-10	False	GridWorld	ISR	PartialObsDiscrete	Individual_Q	0.2	0.01	1000000
IndivQLearningVarOneEach/125_125_0	decentralized	True	-100	False	GridWorld	ISR	PartialObsDiscrete	Individual_Q	0.2	0.01	1000000
IndivQLearningVarOneEach/126_126_0	decentralized	False	0	False	GridWorld	ISR	FullObsDiscrete	Individual_Q	0.2	0.2	1000000
IndivQLearningVarOneEach/127_127_0	decentralized	True	-10	False	GridWorld	ISR	FullObsDiscrete	Individual_Q	0.2	0.2	1000000
IndivQLearningVarOneEach/128_128_0	decentralized	True	-100	False	GridWorld	ISR	FullObsDiscrete	Individual_Q	0.2	0.2	1000000
IndivQLearningVarOneEach/129_129_0	decentralized	False	0	False	GridWorld	ISR	FullObsDiscrete	Individual_Q	0.2	0.01	1000000
IndivQLearningVarOneEach/130_130_0	decentralized	True	-10	False	GridWorld	ISR	FullObsDiscrete	Individual_Q	0.2	0.01	1000000
IndivQLearningVarOneEach/131_131_0	decentralized	True	-100	False	GridWorld	ISR	FullObsDiscrete	Individual_Q	0.2	0.01	1000000
IndivQLearningVarOneEach/132_132_0	none	False	0	False	GridWorld	ISR	PartialObsDiscrete	Individual_Q	0.2	0.2	1000000
IndivQLearningVarOneEach/133_133_0	none	True	-10	False	GridWorld	ISR	PartialObsDiscrete	Individual_Q	0.2	0.2	1000000
IndivQLearningVarOneEach/134_134_0	none	True	-100	False	GridWorld	ISR	PartialObsDiscrete	Individual_Q	0.2	0.2	1000000
IndivQLearningVarOneEach/135_135_0	none	False	0	False	GridWorld	ISR	PartialObsDiscrete	Individual_Q	0.2	0.01	1000000
IndivQLearningVarOneEach/136_136_0	none	True	-10	False	GridWorld	ISR	PartialObsDiscrete	Individual_Q	0.2	0.01	1000000
IndivQLearningVarOneEach/137_137_0	none	True	-100	False	GridWorld	ISR	PartialObsDiscrete	Individual_Q	0.2	0.01	1000000
IndivQLearningVarOneEach/138_138_0	none	False	0	False	GridWorld	ISR	FullObsDiscrete	Individual_Q	0.2	0.2	1000000
IndivQLearningVarOneEach/139_139_0	none	True	-10	False	GridWorld	ISR	FullObsDiscrete	Individual_Q	0.2	0.2	1000000
IndivQLearningVarOneEach/140_140_0	none	True	-100	False	GridWorld	ISR	FullObsDiscrete	Individual_Q	0.2	0.2	1000000
IndivQLearningVarOneEach/141_141_0	none	False	0	False	GridWorld	ISR	FullObsDiscrete	Individual_Q	0.2	0.01	1000000
IndivQLearningVarOneEach/142_142_0	none	True	-10	False	GridWorld	ISR	FullObsDiscrete	Individual_Q	0.2	0.01	1000000
IndivQLearningVarOneEach/143_143_0	none	True	-100	False	GridWorld	ISR	FullObsDiscrete	Individual_Q	0.2	0.01	1000000
IndivQLearningVarOneEach/144_144_0	centralized	False	0	True	GridWorld	SUNY	PartialObsDiscrete	Individual_Q	0.2	0.2	1000000
IndivQLearningVarOneEach/145_145_0	centralized	True	-10	True	GridWorld	SUNY	PartialObsDiscrete	Individual_Q	0.2	0.2	1000000
IndivQLearningVarOneEach/146_146_0	centralized	True	-100	True	GridWorld	SUNY	PartialObsDiscrete	Individual_Q	0.2	0.2	1000000
IndivQLearningVarOneEach/147_147_0	centralized	False	0	True	GridWorld	SUNY	PartialObsDiscrete	Individual_Q	0.2	0.01	1000000
IndivQLearningVarOneEach/148_148_0	centralized	True	-10	True	GridWorld	SUNY	PartialObsDiscrete	Individual_Q	0.2	0.01	1000000
IndivQLearningVarOneEach/149_149_0	centralized	True	-100	True	GridWorld	SUNY	PartialObsDiscrete	Individual_Q	0.2	0.01	1000000
IndivQLearningVarOneEach/150_150_0	centralized	False	0	True	GridWorld	SUNY	FullObsDiscrete	Individual_Q	0.2	0.2	1000000
IndivQLearningVarOneEach/151_151_0	centralized	True	-10	True	GridWorld	SUNY	FullObsDiscrete	Individual_Q	0.2	0.2	1000000
IndivQLearningVarOneEach/152_152_0	centralized	True	-100	True	GridWorld	SUNY	FullObsDiscrete	Individual_Q	0.2	0.2	1000000
IndivQLearningVarOneEach/153_153_0	centralized	False	0	True	GridWorld	SUNY	FullObsDiscrete	Individual_Q	0.2	0.01	1000000
IndivQLearningVarOneEach/154_154_0	centralized	True	-10	True	GridWorld	SUNY	FullObsDiscrete	Individual_Q	0.2	0.01	1000000
IndivQLearningVarOneEach/155_155_0	centralized	True	-100	True	GridWorld	SUNY	FullObsDiscrete	Individual_Q	0.2	0.01	1000000
IndivQLearningVarOneEach/156_156_0	decentralized	False	0	True	GridWorld	SUNY	PartialObsDiscrete	Individual_Q	0.2	0.2	1000000
IndivQLearningVarOneEach/157_157_0	decentralized	True	-10	True	GridWorld	SUNY	PartialObsDiscrete	Individual_Q	0.2	0.2	1000000
IndivQLearningVarOneEach/158_158_0	decentralized	True	-100	True	GridWorld	SUNY	PartialObsDiscrete	Individual_Q	0.2	0.2	1000000
IndivQLearningVarOneEach/159_159_0	decentralized	False	0	True	GridWorld	SUNY	PartialObsDiscrete	Individual_Q	0.2	0.01	1000000
IndivQLearningVarOneEach/160_160_0	decentralized	True	-10	True	GridWorld	SUNY	PartialObsDiscrete	Individual_Q	0.2	0.01	1000000
IndivQLearningVarOneEach/161_161_0	decentralized	True	-100	True	GridWorld	SUNY	PartialObsDiscrete	Individual_Q	0.2	0.01	1000000
IndivQLearningVarOneEach/162_162_0	decentralized	False	0	True	GridWorld	SUNY	FullObsDiscrete	Individual_Q	0.2	0.2	1000000
IndivQLearningVarOneEach/163_163_0	decentralized	True	-10	True	GridWorld	SUNY	FullObsDiscrete	Individual_Q	0.2	0.2	1000000
IndivQLearningVarOneEach/164_164_0	decentralized	True	-100	True	GridWorld	SUNY	FullObsDiscrete	Individual_Q	0.2	0.2	1000000
IndivQLearningVarOneEach/165_165_0	decentralized	False	0	True	GridWorld	SUNY	FullObsDiscrete	Individual_Q	0.2	0.01	1000000
IndivQLearningVarOneEach/166_166_0	decentralized	True	-10	True	GridWorld	SUNY	FullObsDiscrete	Individual_Q	0.2	0.01	1000000
IndivQLearningVarOneEach/167_167_0	decentralized	True	-100	True	GridWorld	SUNY	FullObsDiscrete	Individual_Q	0.2	0.01	1000000
IndivQLearningVarOneEach/168_168_0	none	False	0	True	GridWorld	SUNY	PartialObsDiscrete	Individual_Q	0.2	0.2	1000000
IndivQLearningVarOneEach/169_169_0	none	True	-10	True	GridWorld	SUNY	PartialObsDiscrete	Individual_Q	0.2	0.2	1000000
IndivQLearningVarOneEach/170_170_0	none	True	-100	True	GridWorld	SUNY	PartialObsDiscrete	Individual_Q	0.2	0.2	1000000
IndivQLearningVarOneEach/171_171_0	none	False	0	True	GridWorld	SUNY	PartialObsDiscrete	Individual_Q	0.2	0.01	1000000
IndivQLearningVarOneEach/172_172_0	none	True	-10	True	GridWorld	SUNY	PartialObsDiscrete	Individual_Q	0.2	0.01	1000000
IndivQLearningVarOneEach/173_173_0	none	True	-100	True	GridWorld	SUNY	PartialObsDiscrete	Individual_Q	0.2	0.01	1000000
IndivQLearningVarOneEach/174_174_0	none	False	0	True	GridWorld	SUNY	FullObsDiscrete	Individual_Q	0.2	0.2	1000000
IndivQLearningVarOneEach/175_175_0	none	True	-10	True	GridWorld	SUNY	FullObsDiscrete	Individual_Q	0.2	0.2	1000000
IndivQLearningVarOneEach/176_176_0	none	True	-100	True	GridWorld	SUNY	FullObsDiscrete	Individual_Q	0.2	0.2	1000000
IndivQLearningVarOneEach/177_177_0	none	False	0	True	GridWorld	SUNY	FullObsDiscrete	Individual_Q	0.2	0.01	1000000
IndivQLearningVarOneEach/178_178_0	none	True	-10	True	GridWorld	SUNY	FullObsDiscrete	Individual_Q	0.2	0.01	1000000
IndivQLearningVarOneEach/179_179_0	none	True	-100	True	GridWorld	SUNY	FullObsDiscrete	Individual_Q	0.2	0.01	1000000
IndivQLearningVarOneEach/180_180_0	centralized	False	0	False	GridWorld	SUNY	PartialObsDiscrete	Individual_Q	0.2	0.2	1000000
IndivQLearningVarOneEach/181_181_0	centralized	True	-10	False	GridWorld	SUNY	PartialObsDiscrete	Individual_Q	0.2	0.2	1000000
IndivQLearningVarOneEach/182_182_0	centralized	True	-100	False	GridWorld	SUNY	PartialObsDiscrete	Individual_Q	0.2	0.2	1000000
IndivQLearningVarOneEach/183_183_0	centralized	False	0	False	GridWorld	SUNY	PartialObsDiscrete	Individual_Q	0.2	0.01	1000000
IndivQLearningVarOneEach/184_184_0	centralized	True	-10	False	GridWorld	SUNY	PartialObsDiscrete	Individual_Q	0.2	0.01	1000000
IndivQLearningVarOneEach/185_185_0	centralized	True	-100	False	GridWorld	SUNY	PartialObsDiscrete	Individual_Q	0.2	0.01	1000000
IndivQLearningVarOneEach/186_186_0	centralized	False	0	False	GridWorld	SUNY	FullObsDiscrete	Individual_Q	0.2	0.2	1000000
IndivQLearningVarOneEach/187_187_0	centralized	True	-10	False	GridWorld	SUNY	FullObsDiscrete	Individual_Q	0.2	0.2	1000000
IndivQLearningVarOneEach/188_188_0	centralized	True	-100	False	GridWorld	SUNY	FullObsDiscrete	Individual_Q	0.2	0.2	1000000
IndivQLearningVarOneEach/189_189_0	centralized	False	0	False	GridWorld	SUNY	FullObsDiscrete	Individual_Q	0.2	0.01	1000000
IndivQLearningVarOneEach/190_190_0	centralized	True	-10	False	GridWorld	SUNY	FullObsDiscrete	Individual_Q	0.2	0.01	1000000
IndivQLearningVarOneEach/191_191_0	centralized	True	-100	False	GridWorld	SUNY	FullObsDiscrete	Individual_Q	0.2	0.01	1000000
IndivQLearningVarOneEach/192_192_0	decentralized	False	0	False	GridWorld	SUNY	PartialObsDiscrete	Individual_Q	0.2	0.2	1000000
IndivQLearningVarOneEach/193_193_0	decentralized	True	-10	False	GridWorld	SUNY	PartialObsDiscrete	Individual_Q	0.2	0.2	1000000
IndivQLearningVarOneEach/194_194_0	decentralized	True	-100	False	GridWorld	SUNY	PartialObsDiscrete	Individual_Q	0.2	0.2	1000000
IndivQLearningVarOneEach/195_195_0	decentralized	False	0	False	GridWorld	SUNY	PartialObsDiscrete	Individual_Q	0.2	0.01	1000000
IndivQLearningVarOneEach/196_196_0	decentralized	True	-10	False	GridWorld	SUNY	PartialObsDiscrete	Individual_Q	0.2	0.01	1000000
IndivQLearningVarOneEach/197_197_0	decentralized	True	-100	False	GridWorld	SUNY	PartialObsDiscrete	Individual_Q	0.2	0.01	1000000
IndivQLearningVarOneEach/198_198_0	decentralized	False	0	False	GridWorld	SUNY	FullObsDiscrete	Individual_Q	0.2	0.2	1000000
IndivQLearningVarOneEach/199_199_0	decentralized	True	-10	False	GridWorld	SUNY	FullObsDiscrete	Individual_Q	0.2	0.2	1000000
IndivQLearningVarOneEach/200_200_0	decentralized	True	-100	False	GridWorld	SUNY	FullObsDiscrete	Individual_Q	0.2	0.2	1000000
IndivQLearningVarOneEach/201_201_0	decentralized	False	0	False	GridWorld	SUNY	FullObsDiscrete	Individual_Q	0.2	0.01	1000000
IndivQLearningVarOneEach/202_202_0	decentralized	True	-10	False	GridWorld	SUNY	FullObsDiscrete	Individual_Q	0.2	0.01	1000000
IndivQLearningVarOneEach/203_203_0	decentralized	True	-100	False	GridWorld	SUNY	FullObsDiscrete	Individual_Q	0.2	0.01	1000000
IndivQLearningVarOneEach/204_204_0	none	False	0	False	GridWorld	SUNY	PartialObsDiscrete	Individual_Q	0.2	0.2	1000000
IndivQLearningVarOneEach/205_205_0	none	True	-10	False	GridWorld	SUNY	PartialObsDiscrete	Individual_Q	0.2	0.2	1000000
IndivQLearningVarOneEach/206_206_0	none	True	-100	False	GridWorld	SUNY	PartialObsDiscrete	Individual_Q	0.2	0.2	1000000
IndivQLearningVarOneEach/207_207_0	none	False	0	False	GridWorld	SUNY	PartialObsDiscrete	Individual_Q	0.2	0.01	1000000
IndivQLearningVarOneEach/208_208_0	none	True	-10	False	GridWorld	SUNY	PartialObsDiscrete	Individual_Q	0.2	0.01	1000000
IndivQLearningVarOneEach/209_209_0	none	True	-100	False	GridWorld	SUNY	PartialObsDiscrete	Individual_Q	0.2	0.01	1000000
IndivQLearningVarOneEach/210_210_0	none	False	0	False	GridWorld	SUNY	FullObsDiscrete	Individual_Q	0.2	0.2	1000000
IndivQLearningVarOneEach/211_211_0	none	True	-10	False	GridWorld	SUNY	FullObsDiscrete	Individual_Q	0.2	0.2	1000000
IndivQLearningVarOneEach/212_212_0	none	True	-100	False	GridWorld	SUNY	FullObsDiscrete	Individual_Q	0.2	0.2	1000000
IndivQLearningVarOneEach/213_213_0	none	False	0	False	GridWorld	SUNY	FullObsDiscrete	Individual_Q	0.2	0.01	1000000
IndivQLearningVarOneEach/214_214_0	none	True	-10	False	GridWorld	SUNY	FullObsDiscrete	Individual_Q	0.2	0.01	1000000
IndivQLearningVarOneEach/215_215_0	none	True	-100	False	GridWorld	SUNY	FullObsDiscrete	Individual_Q	0.2	0.01	1000000
IndivQLearningVarOneEach/216_216_0	centralized	False	0	True	GridWorld	MIT	PartialObsDiscrete	Individual_Q	0.2	0.2	1000000
IndivQLearningVarOneEach/217_217_0	centralized	True	-10	True	GridWorld	MIT	PartialObsDiscrete	Individual_Q	0.2	0.2	1000000
IndivQLearningVarOneEach/218_218_0	centralized	True	-100	True	GridWorld	MIT	PartialObsDiscrete	Individual_Q	0.2	0.2	1000000
IndivQLearningVarOneEach/219_219_0	centralized	False	0	True	GridWorld	MIT	PartialObsDiscrete	Individual_Q	0.2	0.01	1000000
IndivQLearningVarOneEach/220_220_0	centralized	True	-10	True	GridWorld	MIT	PartialObsDiscrete	Individual_Q	0.2	0.01	1000000
IndivQLearningVarOneEach/221_221_0	centralized	True	-100	True	GridWorld	MIT	PartialObsDiscrete	Individual_Q	0.2	0.01	1000000
IndivQLearningVarOneEach/222_222_0	centralized	False	0	True	GridWorld	MIT	FullObsDiscrete	Individual_Q	0.2	0.2	1000000
IndivQLearningVarOneEach/223_223_0	centralized	True	-10	True	GridWorld	MIT	FullObsDiscrete	Individual_Q	0.2	0.2	1000000
IndivQLearningVarOneEach/224_224_0	centralized	True	-100	True	GridWorld	MIT	FullObsDiscrete	Individual_Q	0.2	0.2	1000000
IndivQLearningVarOneEach/225_225_0	centralized	False	0	True	GridWorld	MIT	FullObsDiscrete	Individual_Q	0.2	0.01	1000000
IndivQLearningVarOneEach/226_226_0	centralized	True	-10	True	GridWorld	MIT	FullObsDiscrete	Individual_Q	0.2	0.01	1000000
IndivQLearningVarOneEach/227_227_0	centralized	True	-100	True	GridWorld	MIT	FullObsDiscrete	Individual_Q	0.2	0.01	1000000
IndivQLearningVarOneEach/228_228_0	decentralized	False	0	True	GridWorld	MIT	PartialObsDiscrete	Individual_Q	0.2	0.2	1000000
IndivQLearningVarOneEach/229_229_0	decentralized	True	-10	True	GridWorld	MIT	PartialObsDiscrete	Individual_Q	0.2	0.2	1000000
IndivQLearningVarOneEach/230_230_0	decentralized	True	-100	True	GridWorld	MIT	PartialObsDiscrete	Individual_Q	0.2	0.2	1000000
IndivQLearningVarOneEach/231_231_0	decentralized	False	0	True	GridWorld	MIT	PartialObsDiscrete	Individual_Q	0.2	0.01	1000000
IndivQLearningVarOneEach/232_232_0	decentralized	True	-10	True	GridWorld	MIT	PartialObsDiscrete	Individual_Q	0.2	0.01	1000000
IndivQLearningVarOneEach/233_233_0	decentralized	True	-100	True	GridWorld	MIT	PartialObsDiscrete	Individual_Q	0.2	0.01	1000000
IndivQLearningVarOneEach/234_234_0	decentralized	False	0	True	GridWorld	MIT	FullObsDiscrete	Individual_Q	0.2	0.2	1000000
IndivQLearningVarOneEach/235_235_0	decentralized	True	-10	True	GridWorld	MIT	FullObsDiscrete	Individual_Q	0.2	0.2	1000000
IndivQLearningVarOneEach/236_236_0	decentralized	True	-100	True	GridWorld	MIT	FullObsDiscrete	Individual_Q	0.2	0.2	1000000
IndivQLearningVarOneEach/237_237_0	decentralized	False	0	True	GridWorld	MIT	FullObsDiscrete	Individual_Q	0.2	0.01	1000000
IndivQLearningVarOneEach/238_238_0	decentralized	True	-10	True	GridWorld	MIT	FullObsDiscrete	Individual_Q	0.2	0.01	1000000
IndivQLearningVarOneEach/239_239_0	decentralized	True	-100	True	GridWorld	MIT	FullObsDiscrete	Individual_Q	0.2	0.01	1000000
IndivQLearningVarOneEach/240_240_0	none	False	0	True	GridWorld	MIT	PartialObsDiscrete	Individual_Q	0.2	0.2	1000000
IndivQLearningVarOneEach/241_241_0	none	True	-10	True	GridWorld	MIT	PartialObsDiscrete	Individual_Q	0.2	0.2	1000000
IndivQLearningVarOneEach/242_242_0	none	True	-100	True	GridWorld	MIT	PartialObsDiscrete	Individual_Q	0.2	0.2	1000000
IndivQLearningVarOneEach/243_243_0	none	False	0	True	GridWorld	MIT	PartialObsDiscrete	Individual_Q	0.2	0.01	1000000
IndivQLearningVarOneEach/244_244_0	none	True	-10	True	GridWorld	MIT	PartialObsDiscrete	Individual_Q	0.2	0.01	1000000
IndivQLearningVarOneEach/245_245_0	none	True	-100	True	GridWorld	MIT	PartialObsDiscrete	Individual_Q	0.2	0.01	1000000
IndivQLearningVarOneEach/246_246_0	none	False	0	True	GridWorld	MIT	FullObsDiscrete	Individual_Q	0.2	0.2	1000000
IndivQLearningVarOneEach/247_247_0	none	True	-10	True	GridWorld	MIT	FullObsDiscrete	Individual_Q	0.2	0.2	1000000
IndivQLearningVarOneEach/248_248_0	none	True	-100	True	GridWorld	MIT	FullObsDiscrete	Individual_Q	0.2	0.2	1000000
IndivQLearningVarOneEach/249_249_0	none	False	0	True	GridWorld	MIT	FullObsDiscrete	Individual_Q	0.2	0.01	1000000
IndivQLearningVarOneEach/250_250_0	none	True	-10	True	GridWorld	MIT	FullObsDiscrete	Individual_Q	0.2	0.01	1000000
IndivQLearningVarOneEach/251_251_0	none	True	-100	True	GridWorld	MIT	FullObsDiscrete	Individual_Q	0.2	0.01	1000000
IndivQLearningVarOneEach/252_252_0	centralized	False	0	False	GridWorld	MIT	PartialObsDiscrete	Individual_Q	0.2	0.2	1000000
IndivQLearningVarOneEach/253_253_0	centralized	True	-10	False	GridWorld	MIT	PartialObsDiscrete	Individual_Q	0.2	0.2	1000000
IndivQLearningVarOneEach/254_254_0	centralized	True	-100	False	GridWorld	MIT	PartialObsDiscrete	Individual_Q	0.2	0.2	1000000
IndivQLearningVarOneEach/255_255_0	centralized	False	0	False	GridWorld	MIT	PartialObsDiscrete	Individual_Q	0.2	0.01	1000000
IndivQLearningVarOneEach/256_256_0	centralized	True	-10	False	GridWorld	MIT	PartialObsDiscrete	Individual_Q	0.2	0.01	1000000
IndivQLearningVarOneEach/257_257_0	centralized	True	-100	False	GridWorld	MIT	PartialObsDiscrete	Individual_Q	0.2	0.01	1000000
IndivQLearningVarOneEach/258_258_0	centralized	False	0	False	GridWorld	MIT	FullObsDiscrete	Individual_Q	0.2	0.2	1000000
IndivQLearningVarOneEach/259_259_0	centralized	True	-10	False	GridWorld	MIT	FullObsDiscrete	Individual_Q	0.2	0.2	1000000
IndivQLearningVarOneEach/260_260_0	centralized	True	-100	False	GridWorld	MIT	FullObsDiscrete	Individual_Q	0.2	0.2	1000000
IndivQLearningVarOneEach/261_261_0	centralized	False	0	False	GridWorld	MIT	FullObsDiscrete	Individual_Q	0.2	0.01	1000000
IndivQLearningVarOneEach/262_262_0	centralized	True	-10	False	GridWorld	MIT	FullObsDiscrete	Individual_Q	0.2	0.01	1000000
IndivQLearningVarOneEach/263_263_0	centralized	True	-100	False	GridWorld	MIT	FullObsDiscrete	Individual_Q	0.2	0.01	1000000
IndivQLearningVarOneEach/264_264_0	decentralized	False	0	False	GridWorld	MIT	PartialObsDiscrete	Individual_Q	0.2	0.2	1000000
IndivQLearningVarOneEach/265_265_0	decentralized	True	-10	False	GridWorld	MIT	PartialObsDiscrete	Individual_Q	0.2	0.2	1000000
IndivQLearningVarOneEach/266_266_0	decentralized	True	-100	False	GridWorld	MIT	PartialObsDiscrete	Individual_Q	0.2	0.2	1000000
IndivQLearningVarOneEach/267_267_0	decentralized	False	0	False	GridWorld	MIT	PartialObsDiscrete	Individual_Q	0.2	0.01	1000000
IndivQLearningVarOneEach/268_268_0	decentralized	True	-10	False	GridWorld	MIT	PartialObsDiscrete	Individual_Q	0.2	0.01	1000000
IndivQLearningVarOneEach/269_269_0	decentralized	True	-100	False	GridWorld	MIT	PartialObsDiscrete	Individual_Q	0.2	0.01	1000000
IndivQLearningVarOneEach/270_270_0	decentralized	False	0	False	GridWorld	MIT	FullObsDiscrete	Individual_Q	0.2	0.2	1000000
IndivQLearningVarOneEach/271_271_0	decentralized	True	-10	False	GridWorld	MIT	FullObsDiscrete	Individual_Q	0.2	0.2	1000000
IndivQLearningVarOneEach/272_272_0	decentralized	True	-100	False	GridWorld	MIT	FullObsDiscrete	Individual_Q	0.2	0.2	1000000
IndivQLearningVarOneEach/273_273_0	decentralized	False	0	False	GridWorld	MIT	FullObsDiscrete	Individual_Q	0.2	0.01	1000000
IndivQLearningVarOneEach/274_274_0	decentralized	True	-10	False	GridWorld	MIT	FullObsDiscrete	Individual_Q	0.2	0.01	1000000
IndivQLearningVarOneEach/275_275_0	decentralized	True	-100	False	GridWorld	MIT	FullObsDiscrete	Individual_Q	0.2	0.01	1000000
IndivQLearningVarOneEach/276_276_0	none	False	0	False	GridWorld	MIT	PartialObsDiscrete	Individual_Q	0.2	0.2	1000000
IndivQLearningVarOneEach/277_277_0	none	True	-10	False	GridWorld	MIT	PartialObsDiscrete	Individual_Q	0.2	0.2	1000000
IndivQLearningVarOneEach/278_278_0	none	True	-100	False	GridWorld	MIT	PartialObsDiscrete	Individual_Q	0.2	0.2	1000000
IndivQLearningVarOneEach/279_279_0	none	False	0	False	GridWorld	MIT	PartialObsDiscrete	Individual_Q	0.2	0.01	1000000
IndivQLearningVarOneEach/280_280_0	none	True	-10	False	GridWorld	MIT	PartialObsDiscrete	Individual_Q	0.2	0.01	1000000
IndivQLearningVarOneEach/281_281_0	none	True	-100	False	GridWorld	MIT	PartialObsDiscrete	Individual_Q	0.2	0.01	1000000
IndivQLearningVarOneEach/282_282_0	none	False	0	False	GridWorld	MIT	FullObsDiscrete	Individual_Q	0.2	0.2	1000000
IndivQLearningVarOneEach/283_283_0	none	True	-10	False	GridWorld	MIT	FullObsDiscrete	Individual_Q	0.2	0.2	1000000
IndivQLearningVarOneEach/284_284_0	none	True	-100	False	GridWorld	MIT	FullObsDiscrete	Individual_Q	0.2	0.2	1000000
IndivQLearningVarOneEach/285_285_0	none	False	0	False	GridWorld	MIT	FullObsDiscrete	Individual_Q	0.2	0.01	1000000
IndivQLearningVarOneEach/286_286_0	none	True	-10	False	GridWorld	MIT	FullObsDiscrete	Individual_Q	0.2	0.01	1000000
IndivQLearningVarOneEach/287_287_0	none	True	-100	False	GridWorld	MIT	FullObsDiscrete	Individual_Q	0.2	0.01	1000000
