# Supplementary material
Source: ML conference proceedings conference paper supplement (https://proceedings.neurips.cc/paper_files/paper/2022/hash/57444e14ecd9e2c8f603b4f012ce3811-Abstract.html)
Supplement: Supplementary file 1 [file 57444e14ecd9e2c8f603b4f012ce3811-Supplemental-Conference.zip › 3410_shield_decentralization_for_sa-Supplementary Material/parallel_configs/IndivQLearningVarOneEachSeed.csv]

run_name	shield	punish_unsafe_orig_action	punish_unsafe_orig_action_modifier	randomize_starts	map_type	grid_world_map_name	grid_world_obs_type	learner_type	learner_anneal_eps_start	learner_anneal_eps_finish	max_total_steps	seed
IndivQLearningVarOneEachSeed/0_0_0	centralized	False	0	True	GridWorld	Pentagon	PartialObsDiscrete	Individual_Q	0.2	0.2	1000000	0
IndivQLearningVarOneEachSeed/1_1_0	centralized	True	-10	True	GridWorld	Pentagon	PartialObsDiscrete	Individual_Q	0.2	0.2	1000000	0
IndivQLearningVarOneEachSeed/2_2_0	centralized	True	-100	True	GridWorld	Pentagon	PartialObsDiscrete	Individual_Q	0.2	0.2	1000000	0
IndivQLearningVarOneEachSeed/3_3_0	centralized	False	0	True	GridWorld	Pentagon	PartialObsDiscrete	Individual_Q	0.2	0.01	1000000	0
IndivQLearningVarOneEachSeed/4_4_0	centralized	True	-10	True	GridWorld	Pentagon	PartialObsDiscrete	Individual_Q	0.2	0.01	1000000	0
IndivQLearningVarOneEachSeed/5_5_0	centralized	True	-100	True	GridWorld	Pentagon	PartialObsDiscrete	Individual_Q	0.2	0.01	1000000	0
IndivQLearningVarOneEachSeed/6_6_0	centralized	False	0	True	GridWorld	Pentagon	FullObsDiscrete	Individual_Q	0.2	0.2	1000000	0
IndivQLearningVarOneEachSeed/7_7_0	centralized	True	-10	True	GridWorld	Pentagon	FullObsDiscrete	Individual_Q	0.2	0.2	1000000	0
IndivQLearningVarOneEachSeed/8_8_0	centralized	True	-100	True	GridWorld	Pentagon	FullObsDiscrete	Individual_Q	0.2	0.2	1000000	0
IndivQLearningVarOneEachSeed/9_9_0	centralized	False	0	True	GridWorld	Pentagon	FullObsDiscrete	Individual_Q	0.2	0.01	1000000	0
IndivQLearningVarOneEachSeed/10_10_0	centralized	True	-10	True	GridWorld	Pentagon	FullObsDiscrete	Individual_Q	0.2	0.01	1000000	0
IndivQLearningVarOneEachSeed/11_11_0	centralized	True	-100	True	GridWorld	Pentagon	FullObsDiscrete	Individual_Q	0.2	0.01	1000000	0
IndivQLearningVarOneEachSeed/12_12_0	decentralized	False	0	True	GridWorld	Pentagon	PartialObsDiscrete	Individual_Q	0.2	0.2	1000000	0
IndivQLearningVarOneEachSeed/13_13_0	decentralized	True	-10	True	GridWorld	Pentagon	PartialObsDiscrete	Individual_Q	0.2	0.2	1000000	0
IndivQLearningVarOneEachSeed/14_14_0	decentralized	True	-100	True	GridWorld	Pentagon	PartialObsDiscrete	Individual_Q	0.2	0.2	1000000	0
IndivQLearningVarOneEachSeed/15_15_0	decentralized	False	0	True	GridWorld	Pentagon	PartialObsDiscrete	Individual_Q	0.2	0.01	1000000	0
IndivQLearningVarOneEachSeed/16_16_0	decentralized	True	-10	True	GridWorld	Pentagon	PartialObsDiscrete	Individual_Q	0.2	0.01	1000000	0
IndivQLearningVarOneEachSeed/17_17_0	decentralized	True	-100	True	GridWorld	Pentagon	PartialObsDiscrete	Individual_Q	0.2	0.01	1000000	0
IndivQLearningVarOneEachSeed/18_18_0	decentralized	False	0	True	GridWorld	Pentagon	FullObsDiscrete	Individual_Q	0.2	0.2	1000000	0
IndivQLearningVarOneEachSeed/19_19_0	decentralized	True	-10	True	GridWorld	Pentagon	FullObsDiscrete	Individual_Q	0.2	0.2	1000000	0
IndivQLearningVarOneEachSeed/20_20_0	decentralized	True	-100	True	GridWorld	Pentagon	FullObsDiscrete	Individual_Q	0.2	0.2	1000000	0
IndivQLearningVarOneEachSeed/21_21_0	decentralized	False	0	True	GridWorld	Pentagon	FullObsDiscrete	Individual_Q	0.2	0.01	1000000	0
IndivQLearningVarOneEachSeed/22_22_0	decentralized	True	-10	True	GridWorld	Pentagon	FullObsDiscrete	Individual_Q	0.2	0.01	1000000	0
IndivQLearningVarOneEachSeed/23_23_0	decentralized	True	-100	True	GridWorld	Pentagon	FullObsDiscrete	Individual_Q	0.2	0.01	1000000	0
IndivQLearningVarOneEachSeed/24_24_0	none	False	0	True	GridWorld	Pentagon	PartialObsDiscrete	Individual_Q	0.2	0.2	1000000	0
IndivQLearningVarOneEachSeed/25_25_0	none	True	-10	True	GridWorld	Pentagon	PartialObsDiscrete	Individual_Q	0.2	0.2	1000000	0
IndivQLearningVarOneEachSeed/26_26_0	none	True	-100	True	GridWorld	Pentagon	PartialObsDiscrete	Individual_Q	0.2	0.2	1000000	0
IndivQLearningVarOneEachSeed/27_27_0	none	False	0	True	GridWorld	Pentagon	PartialObsDiscrete	Individual_Q	0.2	0.01	1000000	0
IndivQLearningVarOneEachSeed/28_28_0	none	True	-10	True	GridWorld	Pentagon	PartialObsDiscrete	Individual_Q	0.2	0.01	1000000	0
IndivQLearningVarOneEachSeed/29_29_0	none	True	-100	True	GridWorld	Pentagon	PartialObsDiscrete	Individual_Q	0.2	0.01	1000000	0
IndivQLearningVarOneEachSeed/30_30_0	none	False	0	True	GridWorld	Pentagon	FullObsDiscrete	Individual_Q	0.2	0.2	1000000	0
IndivQLearningVarOneEachSeed/31_31_0	none	True	-10	True	GridWorld	Pentagon	FullObsDiscrete	Individual_Q	0.2	0.2	1000000	0
IndivQLearningVarOneEachSeed/32_32_0	none	True	-100	True	GridWorld	Pentagon	FullObsDiscrete	Individual_Q	0.2	0.2	1000000	0
IndivQLearningVarOneEachSeed/33_33_0	none	False	0	True	GridWorld	Pentagon	FullObsDiscrete	Individual_Q	0.2	0.01	1000000	0
IndivQLearningVarOneEachSeed/34_34_0	none	True	-10	True	GridWorld	Pentagon	FullObsDiscrete	Individual_Q	0.2	0.01	1000000	0
IndivQLearningVarOneEachSeed/35_35_0	none	True	-100	True	GridWorld	Pentagon	FullObsDiscrete	Individual_Q	0.2	0.01	1000000	0
IndivQLearningVarOneEachSeed/36_36_0	centralized	False	0	False	GridWorld	Pentagon	PartialObsDiscrete	Individual_Q	0.2	0.2	1000000	0
IndivQLearningVarOneEachSeed/37_37_0	centralized	True	-10	False	GridWorld	Pentagon	PartialObsDiscrete	Individual_Q	0.2	0.2	1000000	0
IndivQLearningVarOneEachSeed/38_38_0	centralized	True	-100	False	GridWorld	Pentagon	PartialObsDiscrete	Individual_Q	0.2	0.2	1000000	0
IndivQLearningVarOneEachSeed/39_39_0	centralized	False	0	False	GridWorld	Pentagon	PartialObsDiscrete	Individual_Q	0.2	0.01	1000000	0
IndivQLearningVarOneEachSeed/40_40_0	centralized	True	-10	False	GridWorld	Pentagon	PartialObsDiscrete	Individual_Q	0.2	0.01	1000000	0
IndivQLearningVarOneEachSeed/41_41_0	centralized	True	-100	False	GridWorld	Pentagon	PartialObsDiscrete	Individual_Q	0.2	0.01	1000000	0
IndivQLearningVarOneEachSeed/42_42_0	centralized	False	0	False	GridWorld	Pentagon	FullObsDiscrete	Individual_Q	0.2	0.2	1000000	0
IndivQLearningVarOneEachSeed/43_43_0	centralized	True	-10	False	GridWorld	Pentagon	FullObsDiscrete	Individual_Q	0.2	0.2	1000000	0
IndivQLearningVarOneEachSeed/44_44_0	centralized	True	-100	False	GridWorld	Pentagon	FullObsDiscrete	Individual_Q	0.2	0.2	1000000	0
IndivQLearningVarOneEachSeed/45_45_0	centralized	False	0	False	GridWorld	Pentagon	FullObsDiscrete	Individual_Q	0.2	0.01	1000000	0
IndivQLearningVarOneEachSeed/46_46_0	centralized	True	-10	False	GridWorld	Pentagon	FullObsDiscrete	Individual_Q	0.2	0.01	1000000	0
IndivQLearningVarOneEachSeed/47_47_0	centralized	True	-100	False	GridWorld	Pentagon	FullObsDiscrete	Individual_Q	0.2	0.01	1000000	0
IndivQLearningVarOneEachSeed/48_48_0	decentralized	False	0	False	GridWorld	Pentagon	PartialObsDiscrete	Individual_Q	0.2	0.2	1000000	0
IndivQLearningVarOneEachSeed/49_49_0	decentralized	True	-10	False	GridWorld	Pentagon	PartialObsDiscrete	Individual_Q	0.2	0.2	1000000	0
IndivQLearningVarOneEachSeed/50_50_0	decentralized	True	-100	False	GridWorld	Pentagon	PartialObsDiscrete	Individual_Q	0.2	0.2	1000000	0
IndivQLearningVarOneEachSeed/51_51_0	decentralized	False	0	False	GridWorld	Pentagon	PartialObsDiscrete	Individual_Q	0.2	0.01	1000000	0
IndivQLearningVarOneEachSeed/52_52_0	decentralized	True	-10	False	GridWorld	Pentagon	PartialObsDiscrete	Individual_Q	0.2	0.01	1000000	0
IndivQLearningVarOneEachSeed/53_53_0	decentralized	True	-100	False	GridWorld	Pentagon	PartialObsDiscrete	Individual_Q	0.2	0.01	1000000	0
IndivQLearningVarOneEachSeed/54_54_0	decentralized	False	0	False	GridWorld	Pentagon	FullObsDiscrete	Individual_Q	0.2	0.2	1000000	0
IndivQLearningVarOneEachSeed/55_55_0	decentralized	True	-10	False	GridWorld	Pentagon	FullObsDiscrete	Individual_Q	0.2	0.2	1000000	0
IndivQLearningVarOneEachSeed/56_56_0	decentralized	True	-100	False	GridWorld	Pentagon	FullObsDiscrete	Individual_Q	0.2	0.2	1000000	0
IndivQLearningVarOneEachSeed/57_57_0	decentralized	False	0	False	GridWorld	Pentagon	FullObsDiscrete	Individual_Q	0.2	0.01	1000000	0
IndivQLearningVarOneEachSeed/58_58_0	decentralized	True	-10	False	GridWorld	Pentagon	FullObsDiscrete	Individual_Q	0.2	0.01	1000000	0
IndivQLearningVarOneEachSeed/59_59_0	decentralized	True	-100	False	GridWorld	Pentagon	FullObsDiscrete	Individual_Q	0.2	0.01	1000000	0
IndivQLearningVarOneEachSeed/60_60_0	none	False	0	False	GridWorld	Pentagon	PartialObsDiscrete	Individual_Q	0.2	0.2	1000000	0
IndivQLearningVarOneEachSeed/61_61_0	none	True	-10	False	GridWorld	Pentagon	PartialObsDiscrete	Individual_Q	0.2	0.2	1000000	0
IndivQLearningVarOneEachSeed/62_62_0	none	True	-100	False	GridWorld	Pentagon	PartialObsDiscrete	Individual_Q	0.2	0.2	1000000	0
IndivQLearningVarOneEachSeed/63_63_0	none	False	0	False	GridWorld	Pentagon	PartialObsDiscrete	Individual_Q	0.2	0.01	1000000	0
IndivQLearningVarOneEachSeed/64_64_0	none	True	-10	False	GridWorld	Pentagon	PartialObsDiscrete	Individual_Q	0.2	0.01	1000000	0
IndivQLearningVarOneEachSeed/65_65_0	none	True	-100	False	GridWorld	Pentagon	PartialObsDiscrete	Individual_Q	0.2	0.01	1000000	0
IndivQLearningVarOneEachSeed/66_66_0	none	False	0	False	GridWorld	Pentagon	FullObsDiscrete	Individual_Q	0.2	0.2	1000000	0
IndivQLearningVarOneEachSeed/67_67_0	none	True	-10	False	GridWorld	Pentagon	FullObsDiscrete	Individual_Q	0.2	0.2	1000000	0
IndivQLearningVarOneEachSeed/68_68_0	none	True	-100	False	GridWorld	Pentagon	FullObsDiscrete	Individual_Q	0.2	0.2	1000000	0
IndivQLearningVarOneEachSeed/69_69_0	none	False	0	False	GridWorld	Pentagon	FullObsDiscrete	Individual_Q	0.2	0.01	1000000	0
IndivQLearningVarOneEachSeed/70_70_0	none	True	-10	False	GridWorld	Pentagon	FullObsDiscrete	Individual_Q	0.2	0.01	1000000	0
IndivQLearningVarOneEachSeed/71_71_0	none	True	-100	False	GridWorld	Pentagon	FullObsDiscrete	Individual_Q	0.2	0.01	1000000	0
IndivQLearningVarOneEachSeed/72_72_0	centralized	False	0	True	GridWorld	ISR	PartialObsDiscrete	Individual_Q	0.2	0.2	1000000	0
IndivQLearningVarOneEachSeed/73_73_0	centralized	True	-10	True	GridWorld	ISR	PartialObsDiscrete	Individual_Q	0.2	0.2	1000000	0
IndivQLearningVarOneEachSeed/74_74_0	centralized	True	-100	True	GridWorld	ISR	PartialObsDiscrete	Individual_Q	0.2	0.2	1000000	0
IndivQLearningVarOneEachSeed/75_75_0	centralized	False	0	True	GridWorld	ISR	PartialObsDiscrete	Individual_Q	0.2	0.01	1000000	0
IndivQLearningVarOneEachSeed/76_76_0	centralized	True	-10	True	GridWorld	ISR	PartialObsDiscrete	Individual_Q	0.2	0.01	1000000	0
IndivQLearningVarOneEachSeed/77_77_0	centralized	True	-100	True	GridWorld	ISR	PartialObsDiscrete	Individual_Q	0.2	0.01	1000000	0
IndivQLearningVarOneEachSeed/78_78_0	centralized	False	0	True	GridWorld	ISR	FullObsDiscrete	Individual_Q	0.2	0.2	1000000	0
IndivQLearningVarOneEachSeed/79_79_0	centralized	True	-10	True	GridWorld	ISR	FullObsDiscrete	Individual_Q	0.2	0.2	1000000	0
IndivQLearningVarOneEachSeed/80_80_0	centralized	True	-100	True	GridWorld	ISR	FullObsDiscrete	Individual_Q	0.2	0.2	1000000	0
IndivQLearningVarOneEachSeed/81_81_0	centralized	False	0	True	GridWorld	ISR	FullObsDiscrete	Individual_Q	0.2	0.01	1000000	0
IndivQLearningVarOneEachSeed/82_82_0	centralized	True	-10	True	GridWorld	ISR	FullObsDiscrete	Individual_Q	0.2	0.01	1000000	0
IndivQLearningVarOneEachSeed/83_83_0	centralized	True	-100	True	GridWorld	ISR	FullObsDiscrete	Individual_Q	0.2	0.01	1000000	0
IndivQLearningVarOneEachSeed/84_84_0	decentralized	False	0	True	GridWorld	ISR	PartialObsDiscrete	Individual_Q	0.2	0.2	1000000	0
IndivQLearningVarOneEachSeed/85_85_0	decentralized	True	-10	True	GridWorld	ISR	PartialObsDiscrete	Individual_Q	0.2	0.2	1000000	0
IndivQLearningVarOneEachSeed/86_86_0	decentralized	True	-100	True	GridWorld	ISR	PartialObsDiscrete	Individual_Q	0.2	0.2	1000000	0
IndivQLearningVarOneEachSeed/87_87_0	decentralized	False	0	True	GridWorld	ISR	PartialObsDiscrete	Individual_Q	0.2	0.01	1000000	0
IndivQLearningVarOneEachSeed/88_88_0	decentralized	True	-10	True	GridWorld	ISR	PartialObsDiscrete	Individual_Q	0.2	0.01	1000000	0
IndivQLearningVarOneEachSeed/89_89_0	decentralized	True	-100	True	GridWorld	ISR	PartialObsDiscrete	Individual_Q	0.2	0.01	1000000	0
IndivQLearningVarOneEachSeed/90_90_0	decentralized	False	0	True	GridWorld	ISR	FullObsDiscrete	Individual_Q	0.2	0.2	1000000	0
IndivQLearningVarOneEachSeed/91_91_0	decentralized	True	-10	True	GridWorld	ISR	FullObsDiscrete	Individual_Q	0.2	0.2	1000000	0
IndivQLearningVarOneEachSeed/92_92_0	decentralized	True	-100	True	GridWorld	ISR	FullObsDiscrete	Individual_Q	0.2	0.2	1000000	0
IndivQLearningVarOneEachSeed/93_93_0	decentralized	False	0	True	GridWorld	ISR	FullObsDiscrete	Individual_Q	0.2	0.01	1000000	0
IndivQLearningVarOneEachSeed/94_94_0	decentralized	True	-10	True	GridWorld	ISR	FullObsDiscrete	Individual_Q	0.2	0.01	1000000	0
IndivQLearningVarOneEachSeed/95_95_0	decentralized	True	-100	True	GridWorld	ISR	FullObsDiscrete	Individual_Q	0.2	0.01	1000000	0
IndivQLearningVarOneEachSeed/96_96_0	none	False	0	True	GridWorld	ISR	PartialObsDiscrete	Individual_Q	0.2	0.2	1000000	0
IndivQLearningVarOneEachSeed/97_97_0	none	True	-10	True	GridWorld	ISR	PartialObsDiscrete	Individual_Q	0.2	0.2	1000000	0
IndivQLearningVarOneEachSeed/98_98_0	none	True	-100	True	GridWorld	ISR	PartialObsDiscrete	Individual_Q	0.2	0.2	1000000	0
IndivQLearningVarOneEachSeed/99_99_0	none	False	0	True	GridWorld	ISR	PartialObsDiscrete	Individual_Q	0.2	0.01	1000000	0
IndivQLearningVarOneEachSeed/100_100_0	none	True	-10	True	GridWorld	ISR	PartialObsDiscrete	Individual_Q	0.2	0.01	1000000	0
IndivQLearningVarOneEachSeed/101_101_0	none	True	-100	True	GridWorld	ISR	PartialObsDiscrete	Individual_Q	0.2	0.01	1000000	0
IndivQLearningVarOneEachSeed/102_102_0	none	False	0	True	GridWorld	ISR	FullObsDiscrete	Individual_Q	0.2	0.2	1000000	0
IndivQLearningVarOneEachSeed/103_103_0	none	True	-10	True	GridWorld	ISR	FullObsDiscrete	Individual_Q	0.2	0.2	1000000	0
IndivQLearningVarOneEachSeed/104_104_0	none	True	-100	True	GridWorld	ISR	FullObsDiscrete	Individual_Q	0.2	0.2	1000000	0
IndivQLearningVarOneEachSeed/105_105_0	none	False	0	True	GridWorld	ISR	FullObsDiscrete	Individual_Q	0.2	0.01	1000000	0
IndivQLearningVarOneEachSeed/106_106_0	none	True	-10	True	GridWorld	ISR	FullObsDiscrete	Individual_Q	0.2	0.01	1000000	0
IndivQLearningVarOneEachSeed/107_107_0	none	True	-100	True	GridWorld	ISR	FullObsDiscrete	Individual_Q	0.2	0.01	1000000	0
IndivQLearningVarOneEachSeed/108_108_0	centralized	False	0	False	GridWorld	ISR	PartialObsDiscrete	Individual_Q	0.2	0.2	1000000	0
IndivQLearningVarOneEachSeed/109_109_0	centralized	True	-10	False	GridWorld	ISR	PartialObsDiscrete	Individual_Q	0.2	0.2	1000000	0
IndivQLearningVarOneEachSeed/110_110_0	centralized	True	-100	False	GridWorld	ISR	PartialObsDiscrete	Individual_Q	0.2	0.2	1000000	0
IndivQLearningVarOneEachSeed/111_111_0	centralized	False	0	False	GridWorld	ISR	PartialObsDiscrete	Individual_Q	0.2	0.01	1000000	0
IndivQLearningVarOneEachSeed/112_112_0	centralized	True	-10	False	GridWorld	ISR	PartialObsDiscrete	Individual_Q	0.2	0.01	1000000	0
IndivQLearningVarOneEachSeed/113_113_0	centralized	True	-100	False	GridWorld	ISR	PartialObsDiscrete	Individual_Q	0.2	0.01	1000000	0
IndivQLearningVarOneEachSeed/114_114_0	centralized	False	0	False	GridWorld	ISR	FullObsDiscrete	Individual_Q	0.2	0.2	1000000	0
IndivQLearningVarOneEachSeed/115_115_0	centralized	True	-10	False	GridWorld	ISR	FullObsDiscrete	Individual_Q	0.2	0.2	1000000	0
IndivQLearningVarOneEachSeed/116_116_0	centralized	True	-100	False	GridWorld	ISR	FullObsDiscrete	Individual_Q	0.2	0.2	1000000	0
IndivQLearningVarOneEachSeed/117_117_0	centralized	False	0	False	GridWorld	ISR	FullObsDiscrete	Individual_Q	0.2	0.01	1000000	0
IndivQLearningVarOneEachSeed/118_118_0	centralized	True	-10	False	GridWorld	ISR	FullObsDiscrete	Individual_Q	0.2	0.01	1000000	0
IndivQLearningVarOneEachSeed/119_119_0	centralized	True	-100	False	GridWorld	ISR	FullObsDiscrete	Individual_Q	0.2	0.01	1000000	0
IndivQLearningVarOneEachSeed/120_120_0	decentralized	False	0	False	GridWorld	ISR	PartialObsDiscrete	Individual_Q	0.2	0.2	1000000	0
IndivQLearningVarOneEachSeed/121_121_0	decentralized	True	-10	False	GridWorld	ISR	PartialObsDiscrete	Individual_Q	0.2	0.2	1000000	0
IndivQLearningVarOneEachSeed/122_122_0	decentralized	True	-100	False	GridWorld	ISR	PartialObsDiscrete	Individual_Q	0.2	0.2	1000000	0
IndivQLearningVarOneEachSeed/123_123_0	decentralized	False	0	False	GridWorld	ISR	PartialObsDiscrete	Individual_Q	0.2	0.01	1000000	0
IndivQLearningVarOneEachSeed/124_124_0	decentralized	True	-10	False	GridWorld	ISR	PartialObsDiscrete	Individual_Q	0.2	0.01	1000000	0
IndivQLearningVarOneEachSeed/125_125_0	decentralized	True	-100	False	GridWorld	ISR	PartialObsDiscrete	Individual_Q	0.2	0.01	1000000	0
IndivQLearningVarOneEachSeed/126_126_0	decentralized	False	0	False	GridWorld	ISR	FullObsDiscrete	Individual_Q	0.2	0.2	1000000	0
IndivQLearningVarOneEachSeed/127_127_0	decentralized	True	-10	False	GridWorld	ISR	FullObsDiscrete	Individual_Q	0.2	0.2	1000000	0
IndivQLearningVarOneEachSeed/128_128_0	decentralized	True	-100	False	GridWorld	ISR	FullObsDiscrete	Individual_Q	0.2	0.2	1000000	0
IndivQLearningVarOneEachSeed/129_129_0	decentralized	False	0	False	GridWorld	ISR	FullObsDiscrete	Individual_Q	0.2	0.01	1000000	0
IndivQLearningVarOneEachSeed/130_130_0	decentralized	True	-10	False	GridWorld	ISR	FullObsDiscrete	Individual_Q	0.2	0.01	1000000	0
IndivQLearningVarOneEachSeed/131_131_0	decentralized	True	-100	False	GridWorld	ISR	FullObsDiscrete	Individual_Q	0.2	0.01	1000000	0
IndivQLearningVarOneEachSeed/132_132_0	none	False	0	False	GridWorld	ISR	PartialObsDiscrete	Individual_Q	0.2	0.2	1000000	0
IndivQLearningVarOneEachSeed/133_133_0	none	True	-10	False	GridWorld	ISR	PartialObsDiscrete	Individual_Q	0.2	0.2	1000000	0
IndivQLearningVarOneEachSeed/134_134_0	none	True	-100	False	GridWorld	ISR	PartialObsDiscrete	Individual_Q	0.2	0.2	1000000	0
IndivQLearningVarOneEachSeed/135_135_0	none	False	0	False	GridWorld	ISR	PartialObsDiscrete	Individual_Q	0.2	0.01	1000000	0
IndivQLearningVarOneEachSeed/136_136_0	none	True	-10	False	GridWorld	ISR	PartialObsDiscrete	Individual_Q	0.2	0.01	1000000	0
IndivQLearningVarOneEachSeed/137_137_0	none	True	-100	False	GridWorld	ISR	PartialObsDiscrete	Individual_Q	0.2	0.01	1000000	0
IndivQLearningVarOneEachSeed/138_138_0	none	False	0	False	GridWorld	ISR	FullObsDiscrete	Individual_Q	0.2	0.2	1000000	0
IndivQLearningVarOneEachSeed/139_139_0	none	True	-10	False	GridWorld	ISR	FullObsDiscrete	Individual_Q	0.2	0.2	1000000	0
IndivQLearningVarOneEachSeed/140_140_0	none	True	-100	False	GridWorld	ISR	FullObsDiscrete	Individual_Q	0.2	0.2	1000000	0
IndivQLearningVarOneEachSeed/141_141_0	none	False	0	False	GridWorld	ISR	FullObsDiscrete	Individual_Q	0.2	0.01	1000000	0
IndivQLearningVarOneEachSeed/142_142_0	none	True	-10	False	GridWorld	ISR	FullObsDiscrete	Individual_Q	0.2	0.01	1000000	0
IndivQLearningVarOneEachSeed/143_143_0	none	True	-100	False	GridWorld	ISR	FullObsDiscrete	Individual_Q	0.2	0.01	1000000	0
IndivQLearningVarOneEachSeed/144_144_0	centralized	False	0	True	GridWorld	SUNY	PartialObsDiscrete	Individual_Q	0.2	0.2	1000000	0
IndivQLearningVarOneEachSeed/145_145_0	centralized	True	-10	True	GridWorld	SUNY	PartialObsDiscrete	Individual_Q	0.2	0.2	1000000	0
IndivQLearningVarOneEachSeed/146_146_0	centralized	True	-100	True	GridWorld	SUNY	PartialObsDiscrete	Individual_Q	0.2	0.2	1000000	0
IndivQLearningVarOneEachSeed/147_147_0	centralized	False	0	True	GridWorld	SUNY	PartialObsDiscrete	Individual_Q	0.2	0.01	1000000	0
IndivQLearningVarOneEachSeed/148_148_0	centralized	True	-10	True	GridWorld	SUNY	PartialObsDiscrete	Individual_Q	0.2	0.01	1000000	0
IndivQLearningVarOneEachSeed/149_149_0	centralized	True	-100	True	GridWorld	SUNY	PartialObsDiscrete	Individual_Q	0.2	0.01	1000000	0
IndivQLearningVarOneEachSeed/150_150_0	centralized	False	0	True	GridWorld	SUNY	FullObsDiscrete	Individual_Q	0.2	0.2	1000000	0
IndivQLearningVarOneEachSeed/151_151_0	centralized	True	-10	True	GridWorld	SUNY	FullObsDiscrete	Individual_Q	0.2	0.2	1000000	0
IndivQLearningVarOneEachSeed/152_152_0	centralized	True	-100	True	GridWorld	SUNY	FullObsDiscrete	Individual_Q	0.2	0.2	1000000	0
IndivQLearningVarOneEachSeed/153_153_0	centralized	False	0	True	GridWorld	SUNY	FullObsDiscrete	Individual_Q	0.2	0.01	1000000	0
IndivQLearningVarOneEachSeed/154_154_0	centralized	True	-10	True	GridWorld	SUNY	FullObsDiscrete	Individual_Q	0.2	0.01	1000000	0
IndivQLearningVarOneEachSeed/155_155_0	centralized	True	-100	True	GridWorld	SUNY	FullObsDiscrete	Individual_Q	0.2	0.01	1000000	0
IndivQLearningVarOneEachSeed/156_156_0	decentralized	False	0	True	GridWorld	SUNY	PartialObsDiscrete	Individual_Q	0.2	0.2	1000000	0
IndivQLearningVarOneEachSeed/157_157_0	decentralized	True	-10	True	GridWorld	SUNY	PartialObsDiscrete	Individual_Q	0.2	0.2	1000000	0
IndivQLearningVarOneEachSeed/158_158_0	decentralized	True	-100	True	GridWorld	SUNY	PartialObsDiscrete	Individual_Q	0.2	0.2	1000000	0
IndivQLearningVarOneEachSeed/159_159_0	decentralized	False	0	True	GridWorld	SUNY	PartialObsDiscrete	Individual_Q	0.2	0.01	1000000	0
IndivQLearningVarOneEachSeed/160_160_0	decentralized	True	-10	True	GridWorld	SUNY	PartialObsDiscrete	Individual_Q	0.2	0.01	1000000	0
IndivQLearningVarOneEachSeed/161_161_0	decentralized	True	-100	True	GridWorld	SUNY	PartialObsDiscrete	Individual_Q	0.2	0.01	1000000	0
IndivQLearningVarOneEachSeed/162_162_0	decentralized	False	0	True	GridWorld	SUNY	FullObsDiscrete	Individual_Q	0.2	0.2	1000000	0
IndivQLearningVarOneEachSeed/163_163_0	decentralized	True	-10	True	GridWorld	SUNY	FullObsDiscrete	Individual_Q	0.2	0.2	1000000	0
IndivQLearningVarOneEachSeed/164_164_0	decentralized	True	-100	True	GridWorld	SUNY	FullObsDiscrete	Individual_Q	0.2	0.2	1000000	0
IndivQLearningVarOneEachSeed/165_165_0	decentralized	False	0	True	GridWorld	SUNY	FullObsDiscrete	Individual_Q	0.2	0.01	1000000	0
IndivQLearningVarOneEachSeed/166_166_0	decentralized	True	-10	True	GridWorld	SUNY	FullObsDiscrete	Individual_Q	0.2	0.01	1000000	0
IndivQLearningVarOneEachSeed/167_167_0	decentralized	True	-100	True	GridWorld	SUNY	FullObsDiscrete	Individual_Q	0.2	0.01	1000000	0
IndivQLearningVarOneEachSeed/168_168_0	none	False	0	True	GridWorld	SUNY	PartialObsDiscrete	Individual_Q	0.2	0.2	1000000	0
IndivQLearningVarOneEachSeed/169_169_0	none	True	-10	True	GridWorld	SUNY	PartialObsDiscrete	Individual_Q	0.2	0.2	1000000	0
IndivQLearningVarOneEachSeed/170_170_0	none	True	-100	True	GridWorld	SUNY	PartialObsDiscrete	Individual_Q	0.2	0.2	1000000	0
IndivQLearningVarOneEachSeed/171_171_0	none	False	0	True	GridWorld	SUNY	PartialObsDiscrete	Individual_Q	0.2	0.01	1000000	0
IndivQLearningVarOneEachSeed/172_172_0	none	True	-10	True	GridWorld	SUNY	PartialObsDiscrete	Individual_Q	0.2	0.01	1000000	0
IndivQLearningVarOneEachSeed/173_173_0	none	True	-100	True	GridWorld	SUNY	PartialObsDiscrete	Individual_Q	0.2	0.01	1000000	0
IndivQLearningVarOneEachSeed/174_174_0	none	False	0	True	GridWorld	SUNY	FullObsDiscrete	Individual_Q	0.2	0.2	1000000	0
IndivQLearningVarOneEachSeed/175_175_0	none	True	-10	True	GridWorld	SUNY	FullObsDiscrete	Individual_Q	0.2	0.2	1000000	0
IndivQLearningVarOneEachSeed/176_176_0	none	True	-100	True	GridWorld	SUNY	FullObsDiscrete	Individual_Q	0.2	0.2	1000000	0
IndivQLearningVarOneEachSeed/177_177_0	none	False	0	True	GridWorld	SUNY	FullObsDiscrete	Individual_Q	0.2	0.01	1000000	0
IndivQLearningVarOneEachSeed/178_178_0	none	True	-10	True	GridWorld	SUNY	FullObsDiscrete	Individual_Q	0.2	0.01	1000000	0
IndivQLearningVarOneEachSeed/179_179_0	none	True	-100	True	GridWorld	SUNY	FullObsDiscrete	Individual_Q	0.2	0.01	1000000	0
IndivQLearningVarOneEachSeed/180_180_0	centralized	False	0	False	GridWorld	SUNY	PartialObsDiscrete	Individual_Q	0.2	0.2	1000000	0
IndivQLearningVarOneEachSeed/181_181_0	centralized	True	-10	False	GridWorld	SUNY	PartialObsDiscrete	Individual_Q	0.2	0.2	1000000	0
IndivQLearningVarOneEachSeed/182_182_0	centralized	True	-100	False	GridWorld	SUNY	PartialObsDiscrete	Individual_Q	0.2	0.2	1000000	0
IndivQLearningVarOneEachSeed/183_183_0	centralized	False	0	False	GridWorld	SUNY	PartialObsDiscrete	Individual_Q	0.2	0.01	1000000	0
IndivQLearningVarOneEachSeed/184_184_0	centralized	True	-10	False	GridWorld	SUNY	PartialObsDiscrete	Individual_Q	0.2	0.01	1000000	0
IndivQLearningVarOneEachSeed/185_185_0	centralized	True	-100	False	GridWorld	SUNY	PartialObsDiscrete	Individual_Q	0.2	0.01	1000000	0
IndivQLearningVarOneEachSeed/186_186_0	centralized	False	0	False	GridWorld	SUNY	FullObsDiscrete	Individual_Q	0.2	0.2	1000000	0
IndivQLearningVarOneEachSeed/187_187_0	centralized	True	-10	False	GridWorld	SUNY	FullObsDiscrete	Individual_Q	0.2	0.2	1000000	0
IndivQLearningVarOneEachSeed/188_188_0	centralized	True	-100	False	GridWorld	SUNY	FullObsDiscrete	Individual_Q	0.2	0.2	1000000	0
IndivQLearningVarOneEachSeed/189_189_0	centralized	False	0	False	GridWorld	SUNY	FullObsDiscrete	Individual_Q	0.2	0.01	1000000	0
IndivQLearningVarOneEachSeed/190_190_0	centralized	True	-10	False	GridWorld	SUNY	FullObsDiscrete	Individual_Q	0.2	0.01	1000000	0
IndivQLearningVarOneEachSeed/191_191_0	centralized	True	-100	False	GridWorld	SUNY	FullObsDiscrete	Individual_Q	0.2	0.01	1000000	0
IndivQLearningVarOneEachSeed/192_192_0	decentralized	False	0	False	GridWorld	SUNY	PartialObsDiscrete	Individual_Q	0.2	0.2	1000000	0
IndivQLearningVarOneEachSeed/193_193_0	decentralized	True	-10	False	GridWorld	SUNY	PartialObsDiscrete	Individual_Q	0.2	0.2	1000000	0
IndivQLearningVarOneEachSeed/194_194_0	decentralized	True	-100	False	GridWorld	SUNY	PartialObsDiscrete	Individual_Q	0.2	0.2	1000000	0
IndivQLearningVarOneEachSeed/195_195_0	decentralized	False	0	False	GridWorld	SUNY	PartialObsDiscrete	Individual_Q	0.2	0.01	1000000	0
IndivQLearningVarOneEachSeed/196_196_0	decentralized	True	-10	False	GridWorld	SUNY	PartialObsDiscrete	Individual_Q	0.2	0.01	1000000	0
IndivQLearningVarOneEachSeed/197_197_0	decentralized	True	-100	False	GridWorld	SUNY	PartialObsDiscrete	Individual_Q	0.2	0.01	1000000	0
IndivQLearningVarOneEachSeed/198_198_0	decentralized	False	0	False	GridWorld	SUNY	FullObsDiscrete	Individual_Q	0.2	0.2	1000000	0
IndivQLearningVarOneEachSeed/199_199_0	decentralized	True	-10	False	GridWorld	SUNY	FullObsDiscrete	Individual_Q	0.2	0.2	1000000	0
IndivQLearningVarOneEachSeed/200_200_0	decentralized	True	-100	False	GridWorld	SUNY	FullObsDiscrete	Individual_Q	0.2	0.2	1000000	0
IndivQLearningVarOneEachSeed/201_201_0	decentralized	False	0	False	GridWorld	SUNY	FullObsDiscrete	Individual_Q	0.2	0.01	1000000	0
IndivQLearningVarOneEachSeed/202_202_0	decentralized	True	-10	False	GridWorld	SUNY	FullObsDiscrete	Individual_Q	0.2	0.01	1000000	0
IndivQLearningVarOneEachSeed/203_203_0	decentralized	True	-100	False	GridWorld	SUNY	FullObsDiscrete	Individual_Q	0.2	0.01	1000000	0
IndivQLearningVarOneEachSeed/204_204_0	none	False	0	False	GridWorld	SUNY	PartialObsDiscrete	Individual_Q	0.2	0.2	1000000	0
IndivQLearningVarOneEachSeed/205_205_0	none	True	-10	False	GridWorld	SUNY	PartialObsDiscrete	Individual_Q	0.2	0.2	1000000	0
IndivQLearningVarOneEachSeed/206_206_0	none	True	-100	False	GridWorld	SUNY	PartialObsDiscrete	Individual_Q	0.2	0.2	1000000	0
IndivQLearningVarOneEachSeed/207_207_0	none	False	0	False	GridWorld	SUNY	PartialObsDiscrete	Individual_Q	0.2	0.01	1000000	0
IndivQLearningVarOneEachSeed/208_208_0	none	True	-10	False	GridWorld	SUNY	PartialObsDiscrete	Individual_Q	0.2	0.01	1000000	0
IndivQLearningVarOneEachSeed/209_209_0	none	True	-100	False	GridWorld	SUNY	PartialObsDiscrete	Individual_Q	0.2	0.01	1000000	0
IndivQLearningVarOneEachSeed/210_210_0	none	False	0	False	GridWorld	SUNY	FullObsDiscrete	Individual_Q	0.2	0.2	1000000	0
IndivQLearningVarOneEachSeed/211_211_0	none	True	-10	False	GridWorld	SUNY	FullObsDiscrete	Individual_Q	0.2	0.2	1000000	0
IndivQLearningVarOneEachSeed/212_212_0	none	True	-100	False	GridWorld	SUNY	FullObsDiscrete	Individual_Q	0.2	0.2	1000000	0
IndivQLearningVarOneEachSeed/213_213_0	none	False	0	False	GridWorld	SUNY	FullObsDiscrete	Individual_Q	0.2	0.01	1000000	0
IndivQLearningVarOneEachSeed/214_214_0	none	True	-10	False	GridWorld	SUNY	FullObsDiscrete	Individual_Q	0.2	0.01	1000000	0
IndivQLearningVarOneEachSeed/215_215_0	none	True	-100	False	GridWorld	SUNY	FullObsDiscrete	Individual_Q	0.2	0.01	1000000	0
IndivQLearningVarOneEachSeed/216_216_0	centralized	False	0	True	GridWorld	MIT	PartialObsDiscrete	Individual_Q	0.2	0.2	1000000	0
IndivQLearningVarOneEachSeed/217_217_0	centralized	True	-10	True	GridWorld	MIT	PartialObsDiscrete	Individual_Q	0.2	0.2	1000000	0
IndivQLearningVarOneEachSeed/218_218_0	centralized	True	-100	True	GridWorld	MIT	PartialObsDiscrete	Individual_Q	0.2	0.2	1000000	0
IndivQLearningVarOneEachSeed/219_219_0	centralized	False	0	True	GridWorld	MIT	PartialObsDiscrete	Individual_Q	0.2	0.01	1000000	0
IndivQLearningVarOneEachSeed/220_220_0	centralized	True	-10	True	GridWorld	MIT	PartialObsDiscrete	Individual_Q	0.2	0.01	1000000	0
IndivQLearningVarOneEachSeed/221_221_0	centralized	True	-100	True	GridWorld	MIT	PartialObsDiscrete	Individual_Q	0.2	0.01	1000000	0
IndivQLearningVarOneEachSeed/222_222_0	centralized	False	0	True	GridWorld	MIT	FullObsDiscrete	Individual_Q	0.2	0.2	1000000	0
IndivQLearningVarOneEachSeed/223_223_0	centralized	True	-10	True	GridWorld	MIT	FullObsDiscrete	Individual_Q	0.2	0.2	1000000	0
IndivQLearningVarOneEachSeed/224_224_0	centralized	True	-100	True	GridWorld	MIT	FullObsDiscrete	Individual_Q	0.2	0.2	1000000	0
IndivQLearningVarOneEachSeed/225_225_0	centralized	False	0	True	GridWorld	MIT	FullObsDiscrete	Individual_Q	0.2	0.01	1000000	0
IndivQLearningVarOneEachSeed/226_226_0	centralized	True	-10	True	GridWorld	MIT	FullObsDiscrete	Individual_Q	0.2	0.01	1000000	0
IndivQLearningVarOneEachSeed/227_227_0	centralized	True	-100	True	GridWorld	MIT	FullObsDiscrete	Individual_Q	0.2	0.01	1000000	0
IndivQLearningVarOneEachSeed/228_228_0	decentralized	False	0	True	GridWorld	MIT	PartialObsDiscrete	Individual_Q	0.2	0.2	1000000	0
IndivQLearningVarOneEachSeed/229_229_0	decentralized	True	-10	True	GridWorld	MIT	PartialObsDiscrete	Individual_Q	0.2	0.2	1000000	0
IndivQLearningVarOneEachSeed/230_230_0	decentralized	True	-100	True	GridWorld	MIT	PartialObsDiscrete	Individual_Q	0.2	0.2	1000000	0
IndivQLearningVarOneEachSeed/231_231_0	decentralized	False	0	True	GridWorld	MIT	PartialObsDiscrete	Individual_Q	0.2	0.01	1000000	0
IndivQLearningVarOneEachSeed/232_232_0	decentralized	True	-10	True	GridWorld	MIT	PartialObsDiscrete	Individual_Q	0.2	0.01	1000000	0
IndivQLearningVarOneEachSeed/233_233_0	decentralized	True	-100	True	GridWorld	MIT	PartialObsDiscrete	Individual_Q	0.2	0.01	1000000	0
IndivQLearningVarOneEachSeed/234_234_0	decentralized	False	0	True	GridWorld	MIT	FullObsDiscrete	Individual_Q	0.2	0.2	1000000	0
IndivQLearningVarOneEachSeed/235_235_0	decentralized	True	-10	True	GridWorld	MIT	FullObsDiscrete	Individual_Q	0.2	0.2	1000000	0
IndivQLearningVarOneEachSeed/236_236_0	decentralized	True	-100	True	GridWorld	MIT	FullObsDiscrete	Individual_Q	0.2	0.2	1000000	0
IndivQLearningVarOneEachSeed/237_237_0	decentralized	False	0	True	GridWorld	MIT	FullObsDiscrete	Individual_Q	0.2	0.01	1000000	0
IndivQLearningVarOneEachSeed/238_238_0	decentralized	True	-10	True	GridWorld	MIT	FullObsDiscrete	Individual_Q	0.2	0.01	1000000	0
IndivQLearningVarOneEachSeed/239_239_0	decentralized	True	-100	True	GridWorld	MIT	FullObsDiscrete	Individual_Q	0.2	0.01	1000000	0
IndivQLearningVarOneEachSeed/240_240_0	none	False	0	True	GridWorld	MIT	PartialObsDiscrete	Individual_Q	0.2	0.2	1000000	0
IndivQLearningVarOneEachSeed/241_241_0	none	True	-10	True	GridWorld	MIT	PartialObsDiscrete	Individual_Q	0.2	0.2	1000000	0
IndivQLearningVarOneEachSeed/242_242_0	none	True	-100	True	GridWorld	MIT	PartialObsDiscrete	Individual_Q	0.2	0.2	1000000	0
IndivQLearningVarOneEachSeed/243_243_0	none	False	0	True	GridWorld	MIT	PartialObsDiscrete	Individual_Q	0.2	0.01	1000000	0
IndivQLearningVarOneEachSeed/244_244_0	none	True	-10	True	GridWorld	MIT	PartialObsDiscrete	Individual_Q	0.2	0.01	1000000	0
IndivQLearningVarOneEachSeed/245_245_0	none	True	-100	True	GridWorld	MIT	PartialObsDiscrete	Individual_Q	0.2	0.01	1000000	0
IndivQLearningVarOneEachSeed/246_246_0	none	False	0	True	GridWorld	MIT	FullObsDiscrete	Individual_Q	0.2	0.2	1000000	0
IndivQLearningVarOneEachSeed/247_247_0	none	True	-10	True	GridWorld	MIT	FullObsDiscrete	Individual_Q	0.2	0.2	1000000	0
IndivQLearningVarOneEachSeed/248_248_0	none	True	-100	True	GridWorld	MIT	FullObsDiscrete	Individual_Q	0.2	0.2	1000000	0
IndivQLearningVarOneEachSeed/249_249_0	none	False	0	True	GridWorld	MIT	FullObsDiscrete	Individual_Q	0.2	0.01	1000000	0
IndivQLearningVarOneEachSeed/250_250_0	none	True	-10	True	GridWorld	MIT	FullObsDiscrete	Individual_Q	0.2	0.01	1000000	0
IndivQLearningVarOneEachSeed/251_251_0	none	True	-100	True	GridWorld	MIT	FullObsDiscrete	Individual_Q	0.2	0.01	1000000	0
IndivQLearningVarOneEachSeed/252_252_0	centralized	False	0	False	GridWorld	MIT	PartialObsDiscrete	Individual_Q	0.2	0.2	1000000	0
IndivQLearningVarOneEachSeed/253_253_0	centralized	True	-10	False	GridWorld	MIT	PartialObsDiscrete	Individual_Q	0.2	0.2	1000000	0
IndivQLearningVarOneEachSeed/254_254_0	centralized	True	-100	False	GridWorld	MIT	PartialObsDiscrete	Individual_Q	0.2	0.2	1000000	0
IndivQLearningVarOneEachSeed/255_255_0	centralized	False	0	False	GridWorld	MIT	PartialObsDiscrete	Individual_Q	0.2	0.01	1000000	0
IndivQLearningVarOneEachSeed/256_256_0	centralized	True	-10	False	GridWorld	MIT	PartialObsDiscrete	Individual_Q	0.2	0.01	1000000	0
IndivQLearningVarOneEachSeed/257_257_0	centralized	True	-100	False	GridWorld	MIT	PartialObsDiscrete	Individual_Q	0.2	0.01	1000000	0
IndivQLearningVarOneEachSeed/258_258_0	centralized	False	0	False	GridWorld	MIT	FullObsDiscrete	Individual_Q	0.2	0.2	1000000	0
IndivQLearningVarOneEachSeed/259_259_0	centralized	True	-10	False	GridWorld	MIT	FullObsDiscrete	Individual_Q	0.2	0.2	1000000	0
IndivQLearningVarOneEachSeed/260_260_0	centralized	True	-100	False	GridWorld	MIT	FullObsDiscrete	Individual_Q	0.2	0.2	1000000	0
IndivQLearningVarOneEachSeed/261_261_0	centralized	False	0	False	GridWorld	MIT	FullObsDiscrete	Individual_Q	0.2	0.01	1000000	0
IndivQLearningVarOneEachSeed/262_262_0	centralized	True	-10	False	GridWorld	MIT	FullObsDiscrete	Individual_Q	0.2	0.01	1000000	0
IndivQLearningVarOneEachSeed/263_263_0	centralized	True	-100	False	GridWorld	MIT	FullObsDiscrete	Individual_Q	0.2	0.01	1000000	0
IndivQLearningVarOneEachSeed/264_264_0	decentralized	False	0	False	GridWorld	MIT	PartialObsDiscrete	Individual_Q	0.2	0.2	1000000	0
IndivQLearningVarOneEachSeed/265_265_0	decentralized	True	-10	False	GridWorld	MIT	PartialObsDiscrete	Individual_Q	0.2	0.2	1000000	0
IndivQLearningVarOneEachSeed/266_266_0	decentralized	True	-100	False	GridWorld	MIT	PartialObsDiscrete	Individual_Q	0.2	0.2	1000000	0
IndivQLearningVarOneEachSeed/267_267_0	decentralized	False	0	False	GridWorld	MIT	PartialObsDiscrete	Individual_Q	0.2	0.01	1000000	0
IndivQLearningVarOneEachSeed/268_268_0	decentralized	True	-10	False	GridWorld	MIT	PartialObsDiscrete	Individual_Q	0.2	0.01	1000000	0
IndivQLearningVarOneEachSeed/269_269_0	decentralized	True	-100	False	GridWorld	MIT	PartialObsDiscrete	Individual_Q	0.2	0.01	1000000	0
IndivQLearningVarOneEachSeed/270_270_0	decentralized	False	0	False	GridWorld	MIT	FullObsDiscrete	Individual_Q	0.2	0.2	1000000	0
IndivQLearningVarOneEachSeed/271_271_0	decentralized	True	-10	False	GridWorld	MIT	FullObsDiscrete	Individual_Q	0.2	0.2	1000000	0
IndivQLearningVarOneEachSeed/272_272_0	decentralized	True	-100	False	GridWorld	MIT	FullObsDiscrete	Individual_Q	0.2	0.2	1000000	0
IndivQLearningVarOneEachSeed/273_273_0	decentralized	False	0	False	GridWorld	MIT	FullObsDiscrete	Individual_Q	0.2	0.01	1000000	0
IndivQLearningVarOneEachSeed/274_274_0	decentralized	True	-10	False	GridWorld	MIT	FullObsDiscrete	Individual_Q	0.2	0.01	1000000	0
IndivQLearningVarOneEachSeed/275_275_0	decentralized	True	-100	False	GridWorld	MIT	FullObsDiscrete	Individual_Q	0.2	0.01	1000000	0
IndivQLearningVarOneEachSeed/276_276_0	none	False	0	False	GridWorld	MIT	PartialObsDiscrete	Individual_Q	0.2	0.2	1000000	0
IndivQLearningVarOneEachSeed/277_277_0	none	True	-10	False	GridWorld	MIT	PartialObsDiscrete	Individual_Q	0.2	0.2	1000000	0
IndivQLearningVarOneEachSeed/278_278_0	none	True	-100	False	GridWorld	MIT	PartialObsDiscrete	Individual_Q	0.2	0.2	1000000	0
IndivQLearningVarOneEachSeed/279_279_0	none	False	0	False	GridWorld	MIT	PartialObsDiscrete	Individual_Q	0.2	0.01	1000000	0
IndivQLearningVarOneEachSeed/280_280_0	none	True	-10	False	GridWorld	MIT	PartialObsDiscrete	Individual_Q	0.2	0.01	1000000	0
IndivQLearningVarOneEachSeed/281_281_0	none	True	-100	False	GridWorld	MIT	PartialObsDiscrete	Individual_Q	0.2	0.01	1000000	0
IndivQLearningVarOneEachSeed/282_282_0	none	False	0	False	GridWorld	MIT	FullObsDiscrete	Individual_Q	0.2	0.2	1000000	0
IndivQLearningVarOneEachSeed/283_283_0	none	True	-10	False	GridWorld	MIT	FullObsDiscrete	Individual_Q	0.2	0.2	1000000	0
IndivQLearningVarOneEachSeed/284_284_0	none	True	-100	False	GridWorld	MIT	FullObsDiscrete	Individual_Q	0.2	0.2	1000000	0
IndivQLearningVarOneEachSeed/285_285_0	none	False	0	False	GridWorld	MIT	FullObsDiscrete	Individual_Q	0.2	0.01	1000000	0
IndivQLearningVarOneEachSeed/286_286_0	none	True	-10	False	GridWorld	MIT	FullObsDiscrete	Individual_Q	0.2	0.01	1000000	0
IndivQLearningVarOneEachSeed/287_287_0	none	True	-100	False	GridWorld	MIT	FullObsDiscrete	Individual_Q	0.2	0.01	1000000	0
