# Supplementary material
Source: ML conference proceedings conference paper supplement (https://proceedings.neurips.cc/paper_files/paper/2022/hash/57444e14ecd9e2c8f603b4f012ce3811-Abstract.html)
Supplement: Supplementary file 1 [file 57444e14ecd9e2c8f603b4f012ce3811-Supplemental-Conference.zip › 3410_shield_decentralization_for_sa-Supplementary Material/parallel_configs/InitialDNN.csv]

run_name	shield	evaluation_shield	punish_unsafe_orig_action	punish_unsafe_orig_action_modifier	randomize_starts	map_type	grid_world_map_name	grid_world_obs_type	learner_type	learner_deep_network_model	learner_anneal_eps_start	learner_anneal_eps_finish	learner_evaluation_epsilon	seed	grid_world_collision_penalty	max_num_episodes
InitialDNN/0_0_0	centralized	none	True	-10	False	GridWorld	Pentagon	FullObsDiscrete	Individual_Q		0.2	0.05	0	0	-30	1000
InitialDNN/1_0_1	centralized	none	True	-10	False	GridWorld	Pentagon	FullObsDiscrete	Individual_Q		0.2	0.05	0	1	-30	1000
InitialDNN/2_0_2	centralized	none	True	-10	False	GridWorld	Pentagon	FullObsDiscrete	Individual_Q		0.2	0.05	0	2	-30	1000
InitialDNN/3_0_3	centralized	none	True	-10	False	GridWorld	Pentagon	FullObsDiscrete	Individual_Q		0.2	0.05	0	3	-30	1000
InitialDNN/4_0_4	centralized	none	True	-10	False	GridWorld	Pentagon	FullObsDiscrete	Individual_Q		0.2	0.05	0	4	-30	1000
InitialDNN/5_0_5	centralized	none	True	-10	False	GridWorld	Pentagon	FullObsDiscrete	Individual_Q		0.2	0.05	0	5	-30	1000
InitialDNN/6_0_6	centralized	none	True	-10	False	GridWorld	Pentagon	FullObsDiscrete	Individual_Q		0.2	0.05	0	6	-30	1000
InitialDNN/7_0_7	centralized	none	True	-10	False	GridWorld	Pentagon	FullObsDiscrete	Individual_Q		0.2	0.05	0	7	-30	1000
InitialDNN/8_0_8	centralized	none	True	-10	False	GridWorld	Pentagon	FullObsDiscrete	Individual_Q		0.2	0.05	0	8	-30	1000
InitialDNN/9_0_9	centralized	none	True	-10	False	GridWorld	Pentagon	FullObsDiscrete	Individual_Q		0.2	0.05	0	9	-30	1000
InitialDNN/10_1_0	none	none	False	0	False	GridWorld	Pentagon	FullObsDiscrete	Individual_Q		0.2	0.05	0	0	0	1000
InitialDNN/11_1_1	none	none	False	0	False	GridWorld	Pentagon	FullObsDiscrete	Individual_Q		0.2	0.05	0	1	0	1000
InitialDNN/12_1_2	none	none	False	0	False	GridWorld	Pentagon	FullObsDiscrete	Individual_Q		0.2	0.05	0	2	0	1000
InitialDNN/13_1_3	none	none	False	0	False	GridWorld	Pentagon	FullObsDiscrete	Individual_Q		0.2	0.05	0	3	0	1000
InitialDNN/14_1_4	none	none	False	0	False	GridWorld	Pentagon	FullObsDiscrete	Individual_Q		0.2	0.05	0	4	0	1000
InitialDNN/15_1_5	none	none	False	0	False	GridWorld	Pentagon	FullObsDiscrete	Individual_Q		0.2	0.05	0	5	0	1000
InitialDNN/16_1_6	none	none	False	0	False	GridWorld	Pentagon	FullObsDiscrete	Individual_Q		0.2	0.05	0	6	0	1000
InitialDNN/17_1_7	none	none	False	0	False	GridWorld	Pentagon	FullObsDiscrete	Individual_Q		0.2	0.05	0	7	0	1000
InitialDNN/18_1_8	none	none	False	0	False	GridWorld	Pentagon	FullObsDiscrete	Individual_Q		0.2	0.05	0	8	0	1000
InitialDNN/19_1_9	none	none	False	0	False	GridWorld	Pentagon	FullObsDiscrete	Individual_Q		0.2	0.05	0	9	0	1000
InitialDNN/20_2_0	none	none	False	0	False	GridWorld	Pentagon	FullObsDiscrete	Individual_Q		0.2	0.05	0	0	-25	1000
InitialDNN/21_2_1	none	none	False	0	False	GridWorld	Pentagon	FullObsDiscrete	Individual_Q		0.2	0.05	0	1	-25	1000
InitialDNN/22_2_2	none	none	False	0	False	GridWorld	Pentagon	FullObsDiscrete	Individual_Q		0.2	0.05	0	2	-25	1000
InitialDNN/23_2_3	none	none	False	0	False	GridWorld	Pentagon	FullObsDiscrete	Individual_Q		0.2	0.05	0	3	-25	1000
InitialDNN/24_2_4	none	none	False	0	False	GridWorld	Pentagon	FullObsDiscrete	Individual_Q		0.2	0.05	0	4	-25	1000
InitialDNN/25_2_5	none	none	False	0	False	GridWorld	Pentagon	FullObsDiscrete	Individual_Q		0.2	0.05	0	5	-25	1000
InitialDNN/26_2_6	none	none	False	0	False	GridWorld	Pentagon	FullObsDiscrete	Individual_Q		0.2	0.05	0	6	-25	1000
InitialDNN/27_2_7	none	none	False	0	False	GridWorld	Pentagon	FullObsDiscrete	Individual_Q		0.2	0.05	0	7	-25	1000
InitialDNN/28_2_8	none	none	False	0	False	GridWorld	Pentagon	FullObsDiscrete	Individual_Q		0.2	0.05	0	8	-25	1000
InitialDNN/29_2_9	none	none	False	0	False	GridWorld	Pentagon	FullObsDiscrete	Individual_Q		0.2	0.05	0	9	-25	1000
InitialDNN/30_3_0	none	none	False	0	False	GridWorld	Pentagon	FullObsDiscrete	Individual_Q		0.2	0.05	0	0	-50	1000
InitialDNN/31_3_1	none	none	False	0	False	GridWorld	Pentagon	FullObsDiscrete	Individual_Q		0.2	0.05	0	1	-50	1000
InitialDNN/32_3_2	none	none	False	0	False	GridWorld	Pentagon	FullObsDiscrete	Individual_Q		0.2	0.05	0	2	-50	1000
InitialDNN/33_3_3	none	none	False	0	False	GridWorld	Pentagon	FullObsDiscrete	Individual_Q		0.2	0.05	0	3	-50	1000
InitialDNN/34_3_4	none	none	False	0	False	GridWorld	Pentagon	FullObsDiscrete	Individual_Q		0.2	0.05	0	4	-50	1000
InitialDNN/35_3_5	none	none	False	0	False	GridWorld	Pentagon	FullObsDiscrete	Individual_Q		0.2	0.05	0	5	-50	1000
InitialDNN/36_3_6	none	none	False	0	False	GridWorld	Pentagon	FullObsDiscrete	Individual_Q		0.2	0.05	0	6	-50	1000
InitialDNN/37_3_7	none	none	False	0	False	GridWorld	Pentagon	FullObsDiscrete	Individual_Q		0.2	0.05	0	7	-50	1000
InitialDNN/38_3_8	none	none	False	0	False	GridWorld	Pentagon	FullObsDiscrete	Individual_Q		0.2	0.05	0	8	-50	1000
InitialDNN/39_3_9	none	none	False	0	False	GridWorld	Pentagon	FullObsDiscrete	Individual_Q		0.2	0.05	0	9	-50	1000
InitialDNN/40_4_0	none	none	False	0	False	GridWorld	Pentagon	FullObsDiscrete	Individual_Q		0.2	0.05	0	0	-75	1000
InitialDNN/41_4_1	none	none	False	0	False	GridWorld	Pentagon	FullObsDiscrete	Individual_Q		0.2	0.05	0	1	-75	1000
InitialDNN/42_4_2	none	none	False	0	False	GridWorld	Pentagon	FullObsDiscrete	Individual_Q		0.2	0.05	0	2	-75	1000
InitialDNN/43_4_3	none	none	False	0	False	GridWorld	Pentagon	FullObsDiscrete	Individual_Q		0.2	0.05	0	3	-75	1000
InitialDNN/44_4_4	none	none	False	0	False	GridWorld	Pentagon	FullObsDiscrete	Individual_Q		0.2	0.05	0	4	-75	1000
InitialDNN/45_4_5	none	none	False	0	False	GridWorld	Pentagon	FullObsDiscrete	Individual_Q		0.2	0.05	0	5	-75	1000
InitialDNN/46_4_6	none	none	False	0	False	GridWorld	Pentagon	FullObsDiscrete	Individual_Q		0.2	0.05	0	6	-75	1000
InitialDNN/47_4_7	none	none	False	0	False	GridWorld	Pentagon	FullObsDiscrete	Individual_Q		0.2	0.05	0	7	-75	1000
InitialDNN/48_4_8	none	none	False	0	False	GridWorld	Pentagon	FullObsDiscrete	Individual_Q		0.2	0.05	0	8	-75	1000
InitialDNN/49_4_9	none	none	False	0	False	GridWorld	Pentagon	FullObsDiscrete	Individual_Q		0.2	0.05	0	9	-75	1000
InitialDNN/50_5_0	none	none	False	0	False	GridWorld	Pentagon	FullObsDiscrete	Individual_Q		0.2	0.05	0	0	-100	1000
InitialDNN/51_5_1	none	none	False	0	False	GridWorld	Pentagon	FullObsDiscrete	Individual_Q		0.2	0.05	0	1	-100	1000
InitialDNN/52_5_2	none	none	False	0	False	GridWorld	Pentagon	FullObsDiscrete	Individual_Q		0.2	0.05	0	2	-100	1000
InitialDNN/53_5_3	none	none	False	0	False	GridWorld	Pentagon	FullObsDiscrete	Individual_Q		0.2	0.05	0	3	-100	1000
InitialDNN/54_5_4	none	none	False	0	False	GridWorld	Pentagon	FullObsDiscrete	Individual_Q		0.2	0.05	0	4	-100	1000
InitialDNN/55_5_5	none	none	False	0	False	GridWorld	Pentagon	FullObsDiscrete	Individual_Q		0.2	0.05	0	5	-100	1000
InitialDNN/56_5_6	none	none	False	0	False	GridWorld	Pentagon	FullObsDiscrete	Individual_Q		0.2	0.05	0	6	-100	1000
InitialDNN/57_5_7	none	none	False	0	False	GridWorld	Pentagon	FullObsDiscrete	Individual_Q		0.2	0.05	0	7	-100	1000
InitialDNN/58_5_8	none	none	False	0	False	GridWorld	Pentagon	FullObsDiscrete	Individual_Q		0.2	0.05	0	8	-100	1000
InitialDNN/59_5_9	none	none	False	0	False	GridWorld	Pentagon	FullObsDiscrete	Individual_Q		0.2	0.05	0	9	-100	1000
InitialDNN/60_6_0	centralized	none	True	-10	False	GridWorld	Pentagon	FullObsDiscrete	Individual_Q		0.2	0.05	0.05	0	-30	1000
InitialDNN/61_6_1	centralized	none	True	-10	False	GridWorld	Pentagon	FullObsDiscrete	Individual_Q		0.2	0.05	0.05	1	-30	1000
InitialDNN/62_6_2	centralized	none	True	-10	False	GridWorld	Pentagon	FullObsDiscrete	Individual_Q		0.2	0.05	0.05	2	-30	1000
InitialDNN/63_6_3	centralized	none	True	-10	False	GridWorld	Pentagon	FullObsDiscrete	Individual_Q		0.2	0.05	0.05	3	-30	1000
InitialDNN/64_6_4	centralized	none	True	-10	False	GridWorld	Pentagon	FullObsDiscrete	Individual_Q		0.2	0.05	0.05	4	-30	1000
InitialDNN/65_6_5	centralized	none	True	-10	False	GridWorld	Pentagon	FullObsDiscrete	Individual_Q		0.2	0.05	0.05	5	-30	1000
InitialDNN/66_6_6	centralized	none	True	-10	False	GridWorld	Pentagon	FullObsDiscrete	Individual_Q		0.2	0.05	0.05	6	-30	1000
InitialDNN/67_6_7	centralized	none	True	-10	False	GridWorld	Pentagon	FullObsDiscrete	Individual_Q		0.2	0.05	0.05	7	-30	1000
InitialDNN/68_6_8	centralized	none	True	-10	False	GridWorld	Pentagon	FullObsDiscrete	Individual_Q		0.2	0.05	0.05	8	-30	1000
InitialDNN/69_6_9	centralized	none	True	-10	False	GridWorld	Pentagon	FullObsDiscrete	Individual_Q		0.2	0.05	0.05	9	-30	1000
InitialDNN/70_7_0	none	none	False	0	False	GridWorld	Pentagon	FullObsDiscrete	Individual_Q		0.2	0.05	0.05	0	0	1000
InitialDNN/71_7_1	none	none	False	0	False	GridWorld	Pentagon	FullObsDiscrete	Individual_Q		0.2	0.05	0.05	1	0	1000
InitialDNN/72_7_2	none	none	False	0	False	GridWorld	Pentagon	FullObsDiscrete	Individual_Q		0.2	0.05	0.05	2	0	1000
InitialDNN/73_7_3	none	none	False	0	False	GridWorld	Pentagon	FullObsDiscrete	Individual_Q		0.2	0.05	0.05	3	0	1000
InitialDNN/74_7_4	none	none	False	0	False	GridWorld	Pentagon	FullObsDiscrete	Individual_Q		0.2	0.05	0.05	4	0	1000
InitialDNN/75_7_5	none	none	False	0	False	GridWorld	Pentagon	FullObsDiscrete	Individual_Q		0.2	0.05	0.05	5	0	1000
InitialDNN/76_7_6	none	none	False	0	False	GridWorld	Pentagon	FullObsDiscrete	Individual_Q		0.2	0.05	0.05	6	0	1000
InitialDNN/77_7_7	none	none	False	0	False	GridWorld	Pentagon	FullObsDiscrete	Individual_Q		0.2	0.05	0.05	7	0	1000
InitialDNN/78_7_8	none	none	False	0	False	GridWorld	Pentagon	FullObsDiscrete	Individual_Q		0.2	0.05	0.05	8	0	1000
InitialDNN/79_7_9	none	none	False	0	False	GridWorld	Pentagon	FullObsDiscrete	Individual_Q		0.2	0.05	0.05	9	0	1000
InitialDNN/80_8_0	none	none	False	0	False	GridWorld	Pentagon	FullObsDiscrete	Individual_Q		0.2	0.05	0.05	0	-25	1000
InitialDNN/81_8_1	none	none	False	0	False	GridWorld	Pentagon	FullObsDiscrete	Individual_Q		0.2	0.05	0.05	1	-25	1000
InitialDNN/82_8_2	none	none	False	0	False	GridWorld	Pentagon	FullObsDiscrete	Individual_Q		0.2	0.05	0.05	2	-25	1000
InitialDNN/83_8_3	none	none	False	0	False	GridWorld	Pentagon	FullObsDiscrete	Individual_Q		0.2	0.05	0.05	3	-25	1000
InitialDNN/84_8_4	none	none	False	0	False	GridWorld	Pentagon	FullObsDiscrete	Individual_Q		0.2	0.05	0.05	4	-25	1000
InitialDNN/85_8_5	none	none	False	0	False	GridWorld	Pentagon	FullObsDiscrete	Individual_Q		0.2	0.05	0.05	5	-25	1000
InitialDNN/86_8_6	none	none	False	0	False	GridWorld	Pentagon	FullObsDiscrete	Individual_Q		0.2	0.05	0.05	6	-25	1000
InitialDNN/87_8_7	none	none	False	0	False	GridWorld	Pentagon	FullObsDiscrete	Individual_Q		0.2	0.05	0.05	7	-25	1000
InitialDNN/88_8_8	none	none	False	0	False	GridWorld	Pentagon	FullObsDiscrete	Individual_Q		0.2	0.05	0.05	8	-25	1000
InitialDNN/89_8_9	none	none	False	0	False	GridWorld	Pentagon	FullObsDiscrete	Individual_Q		0.2	0.05	0.05	9	-25	1000
InitialDNN/90_9_0	none	none	False	0	False	GridWorld	Pentagon	FullObsDiscrete	Individual_Q		0.2	0.05	0.05	0	-50	1000
InitialDNN/91_9_1	none	none	False	0	False	GridWorld	Pentagon	FullObsDiscrete	Individual_Q		0.2	0.05	0.05	1	-50	1000
InitialDNN/92_9_2	none	none	False	0	False	GridWorld	Pentagon	FullObsDiscrete	Individual_Q		0.2	0.05	0.05	2	-50	1000
InitialDNN/93_9_3	none	none	False	0	False	GridWorld	Pentagon	FullObsDiscrete	Individual_Q		0.2	0.05	0.05	3	-50	1000
InitialDNN/94_9_4	none	none	False	0	False	GridWorld	Pentagon	FullObsDiscrete	Individual_Q		0.2	0.05	0.05	4	-50	1000
InitialDNN/95_9_5	none	none	False	0	False	GridWorld	Pentagon	FullObsDiscrete	Individual_Q		0.2	0.05	0.05	5	-50	1000
InitialDNN/96_9_6	none	none	False	0	False	GridWorld	Pentagon	FullObsDiscrete	Individual_Q		0.2	0.05	0.05	6	-50	1000
InitialDNN/97_9_7	none	none	False	0	False	GridWorld	Pentagon	FullObsDiscrete	Individual_Q		0.2	0.05	0.05	7	-50	1000
InitialDNN/98_9_8	none	none	False	0	False	GridWorld	Pentagon	FullObsDiscrete	Individual_Q		0.2	0.05	0.05	8	-50	1000
InitialDNN/99_9_9	none	none	False	0	False	GridWorld	Pentagon	FullObsDiscrete	Individual_Q		0.2	0.05	0.05	9	-50	1000
InitialDNN/100_10_0	none	none	False	0	False	GridWorld	Pentagon	FullObsDiscrete	Individual_Q		0.2	0.05	0.05	0	-75	1000
InitialDNN/101_10_1	none	none	False	0	False	GridWorld	Pentagon	FullObsDiscrete	Individual_Q		0.2	0.05	0.05	1	-75	1000
InitialDNN/102_10_2	none	none	False	0	False	GridWorld	Pentagon	FullObsDiscrete	Individual_Q		0.2	0.05	0.05	2	-75	1000
InitialDNN/103_10_3	none	none	False	0	False	GridWorld	Pentagon	FullObsDiscrete	Individual_Q		0.2	0.05	0.05	3	-75	1000
InitialDNN/104_10_4	none	none	False	0	False	GridWorld	Pentagon	FullObsDiscrete	Individual_Q		0.2	0.05	0.05	4	-75	1000
InitialDNN/105_10_5	none	none	False	0	False	GridWorld	Pentagon	FullObsDiscrete	Individual_Q		0.2	0.05	0.05	5	-75	1000
InitialDNN/106_10_6	none	none	False	0	False	GridWorld	Pentagon	FullObsDiscrete	Individual_Q		0.2	0.05	0.05	6	-75	1000
InitialDNN/107_10_7	none	none	False	0	False	GridWorld	Pentagon	FullObsDiscrete	Individual_Q		0.2	0.05	0.05	7	-75	1000
InitialDNN/108_10_8	none	none	False	0	False	GridWorld	Pentagon	FullObsDiscrete	Individual_Q		0.2	0.05	0.05	8	-75	1000
InitialDNN/109_10_9	none	none	False	0	False	GridWorld	Pentagon	FullObsDiscrete	Individual_Q		0.2	0.05	0.05	9	-75	1000
InitialDNN/110_11_0	none	none	False	0	False	GridWorld	Pentagon	FullObsDiscrete	Individual_Q		0.2	0.05	0.05	0	-100	1000
InitialDNN/111_11_1	none	none	False	0	False	GridWorld	Pentagon	FullObsDiscrete	Individual_Q		0.2	0.05	0.05	1	-100	1000
InitialDNN/112_11_2	none	none	False	0	False	GridWorld	Pentagon	FullObsDiscrete	Individual_Q		0.2	0.05	0.05	2	-100	1000
InitialDNN/113_11_3	none	none	False	0	False	GridWorld	Pentagon	FullObsDiscrete	Individual_Q		0.2	0.05	0.05	3	-100	1000
InitialDNN/114_11_4	none	none	False	0	False	GridWorld	Pentagon	FullObsDiscrete	Individual_Q		0.2	0.05	0.05	4	-100	1000
InitialDNN/115_11_5	none	none	False	0	False	GridWorld	Pentagon	FullObsDiscrete	Individual_Q		0.2	0.05	0.05	5	-100	1000
InitialDNN/116_11_6	none	none	False	0	False	GridWorld	Pentagon	FullObsDiscrete	Individual_Q		0.2	0.05	0.05	6	-100	1000
InitialDNN/117_11_7	none	none	False	0	False	GridWorld	Pentagon	FullObsDiscrete	Individual_Q		0.2	0.05	0.05	7	-100	1000
InitialDNN/118_11_8	none	none	False	0	False	GridWorld	Pentagon	FullObsDiscrete	Individual_Q		0.2	0.05	0.05	8	-100	1000
InitialDNN/119_11_9	none	none	False	0	False	GridWorld	Pentagon	FullObsDiscrete	Individual_Q		0.2	0.05	0.05	9	-100	1000
InitialDNN/120_12_0	centralized	none	True	-10	False	GridWorld	ISR	FullObsDiscrete	Individual_Q		0.2	0.05	0	0	-30	1000
InitialDNN/121_12_1	centralized	none	True	-10	False	GridWorld	ISR	FullObsDiscrete	Individual_Q		0.2	0.05	0	1	-30	1000
InitialDNN/122_12_2	centralized	none	True	-10	False	GridWorld	ISR	FullObsDiscrete	Individual_Q		0.2	0.05	0	2	-30	1000
InitialDNN/123_12_3	centralized	none	True	-10	False	GridWorld	ISR	FullObsDiscrete	Individual_Q		0.2	0.05	0	3	-30	1000
InitialDNN/124_12_4	centralized	none	True	-10	False	GridWorld	ISR	FullObsDiscrete	Individual_Q		0.2	0.05	0	4	-30	1000
InitialDNN/125_12_5	centralized	none	True	-10	False	GridWorld	ISR	FullObsDiscrete	Individual_Q		0.2	0.05	0	5	-30	1000
InitialDNN/126_12_6	centralized	none	True	-10	False	GridWorld	ISR	FullObsDiscrete	Individual_Q		0.2	0.05	0	6	-30	1000
InitialDNN/127_12_7	centralized	none	True	-10	False	GridWorld	ISR	FullObsDiscrete	Individual_Q		0.2	0.05	0	7	-30	1000
InitialDNN/128_12_8	centralized	none	True	-10	False	GridWorld	ISR	FullObsDiscrete	Individual_Q		0.2	0.05	0	8	-30	1000
InitialDNN/129_12_9	centralized	none	True	-10	False	GridWorld	ISR	FullObsDiscrete	Individual_Q		0.2	0.05	0	9	-30	1000
InitialDNN/130_13_0	none	none	False	0	False	GridWorld	ISR	FullObsDiscrete	Individual_Q		0.2	0.05	0	0	0	1000
InitialDNN/131_13_1	none	none	False	0	False	GridWorld	ISR	FullObsDiscrete	Individual_Q		0.2	0.05	0	1	0	1000
InitialDNN/132_13_2	none	none	False	0	False	GridWorld	ISR	FullObsDiscrete	Individual_Q		0.2	0.05	0	2	0	1000
InitialDNN/133_13_3	none	none	False	0	False	GridWorld	ISR	FullObsDiscrete	Individual_Q		0.2	0.05	0	3	0	1000
InitialDNN/134_13_4	none	none	False	0	False	GridWorld	ISR	FullObsDiscrete	Individual_Q		0.2	0.05	0	4	0	1000
InitialDNN/135_13_5	none	none	False	0	False	GridWorld	ISR	FullObsDiscrete	Individual_Q		0.2	0.05	0	5	0	1000
InitialDNN/136_13_6	none	none	False	0	False	GridWorld	ISR	FullObsDiscrete	Individual_Q		0.2	0.05	0	6	0	1000
InitialDNN/137_13_7	none	none	False	0	False	GridWorld	ISR	FullObsDiscrete	Individual_Q		0.2	0.05	0	7	0	1000
InitialDNN/138_13_8	none	none	False	0	False	GridWorld	ISR	FullObsDiscrete	Individual_Q		0.2	0.05	0	8	0	1000
InitialDNN/139_13_9	none	none	False	0	False	GridWorld	ISR	FullObsDiscrete	Individual_Q		0.2	0.05	0	9	0	1000
InitialDNN/140_14_0	none	none	False	0	False	GridWorld	ISR	FullObsDiscrete	Individual_Q		0.2	0.05	0	0	-25	1000
InitialDNN/141_14_1	none	none	False	0	False	GridWorld	ISR	FullObsDiscrete	Individual_Q		0.2	0.05	0	1	-25	1000
InitialDNN/142_14_2	none	none	False	0	False	GridWorld	ISR	FullObsDiscrete	Individual_Q		0.2	0.05	0	2	-25	1000
InitialDNN/143_14_3	none	none	False	0	False	GridWorld	ISR	FullObsDiscrete	Individual_Q		0.2	0.05	0	3	-25	1000
InitialDNN/144_14_4	none	none	False	0	False	GridWorld	ISR	FullObsDiscrete	Individual_Q		0.2	0.05	0	4	-25	1000
InitialDNN/145_14_5	none	none	False	0	False	GridWorld	ISR	FullObsDiscrete	Individual_Q		0.2	0.05	0	5	-25	1000
InitialDNN/146_14_6	none	none	False	0	False	GridWorld	ISR	FullObsDiscrete	Individual_Q		0.2	0.05	0	6	-25	1000
InitialDNN/147_14_7	none	none	False	0	False	GridWorld	ISR	FullObsDiscrete	Individual_Q		0.2	0.05	0	7	-25	1000
InitialDNN/148_14_8	none	none	False	0	False	GridWorld	ISR	FullObsDiscrete	Individual_Q		0.2	0.05	0	8	-25	1000
InitialDNN/149_14_9	none	none	False	0	False	GridWorld	ISR	FullObsDiscrete	Individual_Q		0.2	0.05	0	9	-25	1000
InitialDNN/150_15_0	none	none	False	0	False	GridWorld	ISR	FullObsDiscrete	Individual_Q		0.2	0.05	0	0	-50	1000
InitialDNN/151_15_1	none	none	False	0	False	GridWorld	ISR	FullObsDiscrete	Individual_Q		0.2	0.05	0	1	-50	1000
InitialDNN/152_15_2	none	none	False	0	False	GridWorld	ISR	FullObsDiscrete	Individual_Q		0.2	0.05	0	2	-50	1000
InitialDNN/153_15_3	none	none	False	0	False	GridWorld	ISR	FullObsDiscrete	Individual_Q		0.2	0.05	0	3	-50	1000
InitialDNN/154_15_4	none	none	False	0	False	GridWorld	ISR	FullObsDiscrete	Individual_Q		0.2	0.05	0	4	-50	1000
InitialDNN/155_15_5	none	none	False	0	False	GridWorld	ISR	FullObsDiscrete	Individual_Q		0.2	0.05	0	5	-50	1000
InitialDNN/156_15_6	none	none	False	0	False	GridWorld	ISR	FullObsDiscrete	Individual_Q		0.2	0.05	0	6	-50	1000
InitialDNN/157_15_7	none	none	False	0	False	GridWorld	ISR	FullObsDiscrete	Individual_Q		0.2	0.05	0	7	-50	1000
InitialDNN/158_15_8	none	none	False	0	False	GridWorld	ISR	FullObsDiscrete	Individual_Q		0.2	0.05	0	8	-50	1000
InitialDNN/159_15_9	none	none	False	0	False	GridWorld	ISR	FullObsDiscrete	Individual_Q		0.2	0.05	0	9	-50	1000
InitialDNN/160_16_0	none	none	False	0	False	GridWorld	ISR	FullObsDiscrete	Individual_Q		0.2	0.05	0	0	-75	1000
InitialDNN/161_16_1	none	none	False	0	False	GridWorld	ISR	FullObsDiscrete	Individual_Q		0.2	0.05	0	1	-75	1000
InitialDNN/162_16_2	none	none	False	0	False	GridWorld	ISR	FullObsDiscrete	Individual_Q		0.2	0.05	0	2	-75	1000
InitialDNN/163_16_3	none	none	False	0	False	GridWorld	ISR	FullObsDiscrete	Individual_Q		0.2	0.05	0	3	-75	1000
InitialDNN/164_16_4	none	none	False	0	False	GridWorld	ISR	FullObsDiscrete	Individual_Q		0.2	0.05	0	4	-75	1000
InitialDNN/165_16_5	none	none	False	0	False	GridWorld	ISR	FullObsDiscrete	Individual_Q		0.2	0.05	0	5	-75	1000
InitialDNN/166_16_6	none	none	False	0	False	GridWorld	ISR	FullObsDiscrete	Individual_Q		0.2	0.05	0	6	-75	1000
InitialDNN/167_16_7	none	none	False	0	False	GridWorld	ISR	FullObsDiscrete	Individual_Q		0.2	0.05	0	7	-75	1000
InitialDNN/168_16_8	none	none	False	0	False	GridWorld	ISR	FullObsDiscrete	Individual_Q		0.2	0.05	0	8	-75	1000
InitialDNN/169_16_9	none	none	False	0	False	GridWorld	ISR	FullObsDiscrete	Individual_Q		0.2	0.05	0	9	-75	1000
InitialDNN/170_17_0	none	none	False	0	False	GridWorld	ISR	FullObsDiscrete	Individual_Q		0.2	0.05	0	0	-100	1000
InitialDNN/171_17_1	none	none	False	0	False	GridWorld	ISR	FullObsDiscrete	Individual_Q		0.2	0.05	0	1	-100	1000
InitialDNN/172_17_2	none	none	False	0	False	GridWorld	ISR	FullObsDiscrete	Individual_Q		0.2	0.05	0	2	-100	1000
InitialDNN/173_17_3	none	none	False	0	False	GridWorld	ISR	FullObsDiscrete	Individual_Q		0.2	0.05	0	3	-100	1000
InitialDNN/174_17_4	none	none	False	0	False	GridWorld	ISR	FullObsDiscrete	Individual_Q		0.2	0.05	0	4	-100	1000
InitialDNN/175_17_5	none	none	False	0	False	GridWorld	ISR	FullObsDiscrete	Individual_Q		0.2	0.05	0	5	-100	1000
InitialDNN/176_17_6	none	none	False	0	False	GridWorld	ISR	FullObsDiscrete	Individual_Q		0.2	0.05	0	6	-100	1000
InitialDNN/177_17_7	none	none	False	0	False	GridWorld	ISR	FullObsDiscrete	Individual_Q		0.2	0.05	0	7	-100	1000
InitialDNN/178_17_8	none	none	False	0	False	GridWorld	ISR	FullObsDiscrete	Individual_Q		0.2	0.05	0	8	-100	1000
InitialDNN/179_17_9	none	none	False	0	False	GridWorld	ISR	FullObsDiscrete	Individual_Q		0.2	0.05	0	9	-100	1000
InitialDNN/180_18_0	centralized	none	True	-10	False	GridWorld	ISR	FullObsDiscrete	Individual_Q		0.2	0.05	0.05	0	-30	1000
InitialDNN/181_18_1	centralized	none	True	-10	False	GridWorld	ISR	FullObsDiscrete	Individual_Q		0.2	0.05	0.05	1	-30	1000
InitialDNN/182_18_2	centralized	none	True	-10	False	GridWorld	ISR	FullObsDiscrete	Individual_Q		0.2	0.05	0.05	2	-30	1000
InitialDNN/183_18_3	centralized	none	True	-10	False	GridWorld	ISR	FullObsDiscrete	Individual_Q		0.2	0.05	0.05	3	-30	1000
InitialDNN/184_18_4	centralized	none	True	-10	False	GridWorld	ISR	FullObsDiscrete	Individual_Q		0.2	0.05	0.05	4	-30	1000
InitialDNN/185_18_5	centralized	none	True	-10	False	GridWorld	ISR	FullObsDiscrete	Individual_Q		0.2	0.05	0.05	5	-30	1000
InitialDNN/186_18_6	centralized	none	True	-10	False	GridWorld	ISR	FullObsDiscrete	Individual_Q		0.2	0.05	0.05	6	-30	1000
InitialDNN/187_18_7	centralized	none	True	-10	False	GridWorld	ISR	FullObsDiscrete	Individual_Q		0.2	0.05	0.05	7	-30	1000
InitialDNN/188_18_8	centralized	none	True	-10	False	GridWorld	ISR	FullObsDiscrete	Individual_Q		0.2	0.05	0.05	8	-30	1000
InitialDNN/189_18_9	centralized	none	True	-10	False	GridWorld	ISR	FullObsDiscrete	Individual_Q		0.2	0.05	0.05	9	-30	1000
InitialDNN/190_19_0	none	none	False	0	False	GridWorld	ISR	FullObsDiscrete	Individual_Q		0.2	0.05	0.05	0	0	1000
InitialDNN/191_19_1	none	none	False	0	False	GridWorld	ISR	FullObsDiscrete	Individual_Q		0.2	0.05	0.05	1	0	1000
InitialDNN/192_19_2	none	none	False	0	False	GridWorld	ISR	FullObsDiscrete	Individual_Q		0.2	0.05	0.05	2	0	1000
InitialDNN/193_19_3	none	none	False	0	False	GridWorld	ISR	FullObsDiscrete	Individual_Q		0.2	0.05	0.05	3	0	1000
InitialDNN/194_19_4	none	none	False	0	False	GridWorld	ISR	FullObsDiscrete	Individual_Q		0.2	0.05	0.05	4	0	1000
InitialDNN/195_19_5	none	none	False	0	False	GridWorld	ISR	FullObsDiscrete	Individual_Q		0.2	0.05	0.05	5	0	1000
InitialDNN/196_19_6	none	none	False	0	False	GridWorld	ISR	FullObsDiscrete	Individual_Q		0.2	0.05	0.05	6	0	1000
InitialDNN/197_19_7	none	none	False	0	False	GridWorld	ISR	FullObsDiscrete	Individual_Q		0.2	0.05	0.05	7	0	1000
InitialDNN/198_19_8	none	none	False	0	False	GridWorld	ISR	FullObsDiscrete	Individual_Q		0.2	0.05	0.05	8	0	1000
InitialDNN/199_19_9	none	none	False	0	False	GridWorld	ISR	FullObsDiscrete	Individual_Q		0.2	0.05	0.05	9	0	1000
InitialDNN/200_20_0	none	none	False	0	False	GridWorld	ISR	FullObsDiscrete	Individual_Q		0.2	0.05	0.05	0	-25	1000
InitialDNN/201_20_1	none	none	False	0	False	GridWorld	ISR	FullObsDiscrete	Individual_Q		0.2	0.05	0.05	1	-25	1000
InitialDNN/202_20_2	none	none	False	0	False	GridWorld	ISR	FullObsDiscrete	Individual_Q		0.2	0.05	0.05	2	-25	1000
InitialDNN/203_20_3	none	none	False	0	False	GridWorld	ISR	FullObsDiscrete	Individual_Q		0.2	0.05	0.05	3	-25	1000
InitialDNN/204_20_4	none	none	False	0	False	GridWorld	ISR	FullObsDiscrete	Individual_Q		0.2	0.05	0.05	4	-25	1000
InitialDNN/205_20_5	none	none	False	0	False	GridWorld	ISR	FullObsDiscrete	Individual_Q		0.2	0.05	0.05	5	-25	1000
InitialDNN/206_20_6	none	none	False	0	False	GridWorld	ISR	FullObsDiscrete	Individual_Q		0.2	0.05	0.05	6	-25	1000
InitialDNN/207_20_7	none	none	False	0	False	GridWorld	ISR	FullObsDiscrete	Individual_Q		0.2	0.05	0.05	7	-25	1000
InitialDNN/208_20_8	none	none	False	0	False	GridWorld	ISR	FullObsDiscrete	Individual_Q		0.2	0.05	0.05	8	-25	1000
InitialDNN/209_20_9	none	none	False	0	False	GridWorld	ISR	FullObsDiscrete	Individual_Q		0.2	0.05	0.05	9	-25	1000
InitialDNN/210_21_0	none	none	False	0	False	GridWorld	ISR	FullObsDiscrete	Individual_Q		0.2	0.05	0.05	0	-50	1000
InitialDNN/211_21_1	none	none	False	0	False	GridWorld	ISR	FullObsDiscrete	Individual_Q		0.2	0.05	0.05	1	-50	1000
InitialDNN/212_21_2	none	none	False	0	False	GridWorld	ISR	FullObsDiscrete	Individual_Q		0.2	0.05	0.05	2	-50	1000
InitialDNN/213_21_3	none	none	False	0	False	GridWorld	ISR	FullObsDiscrete	Individual_Q		0.2	0.05	0.05	3	-50	1000
InitialDNN/214_21_4	none	none	False	0	False	GridWorld	ISR	FullObsDiscrete	Individual_Q		0.2	0.05	0.05	4	-50	1000
InitialDNN/215_21_5	none	none	False	0	False	GridWorld	ISR	FullObsDiscrete	Individual_Q		0.2	0.05	0.05	5	-50	1000
InitialDNN/216_21_6	none	none	False	0	False	GridWorld	ISR	FullObsDiscrete	Individual_Q		0.2	0.05	0.05	6	-50	1000
InitialDNN/217_21_7	none	none	False	0	False	GridWorld	ISR	FullObsDiscrete	Individual_Q		0.2	0.05	0.05	7	-50	1000
InitialDNN/218_21_8	none	none	False	0	False	GridWorld	ISR	FullObsDiscrete	Individual_Q		0.2	0.05	0.05	8	-50	1000
InitialDNN/219_21_9	none	none	False	0	False	GridWorld	ISR	FullObsDiscrete	Individual_Q		0.2	0.05	0.05	9	-50	1000
InitialDNN/220_22_0	none	none	False	0	False	GridWorld	ISR	FullObsDiscrete	Individual_Q		0.2	0.05	0.05	0	-75	1000
InitialDNN/221_22_1	none	none	False	0	False	GridWorld	ISR	FullObsDiscrete	Individual_Q		0.2	0.05	0.05	1	-75	1000
InitialDNN/222_22_2	none	none	False	0	False	GridWorld	ISR	FullObsDiscrete	Individual_Q		0.2	0.05	0.05	2	-75	1000
InitialDNN/223_22_3	none	none	False	0	False	GridWorld	ISR	FullObsDiscrete	Individual_Q		0.2	0.05	0.05	3	-75	1000
InitialDNN/224_22_4	none	none	False	0	False	GridWorld	ISR	FullObsDiscrete	Individual_Q		0.2	0.05	0.05	4	-75	1000
InitialDNN/225_22_5	none	none	False	0	False	GridWorld	ISR	FullObsDiscrete	Individual_Q		0.2	0.05	0.05	5	-75	1000
InitialDNN/226_22_6	none	none	False	0	False	GridWorld	ISR	FullObsDiscrete	Individual_Q		0.2	0.05	0.05	6	-75	1000
InitialDNN/227_22_7	none	none	False	0	False	GridWorld	ISR	FullObsDiscrete	Individual_Q		0.2	0.05	0.05	7	-75	1000
InitialDNN/228_22_8	none	none	False	0	False	GridWorld	ISR	FullObsDiscrete	Individual_Q		0.2	0.05	0.05	8	-75	1000
InitialDNN/229_22_9	none	none	False	0	False	GridWorld	ISR	FullObsDiscrete	Individual_Q		0.2	0.05	0.05	9	-75	1000
InitialDNN/230_23_0	none	none	False	0	False	GridWorld	ISR	FullObsDiscrete	Individual_Q		0.2	0.05	0.05	0	-100	1000
InitialDNN/231_23_1	none	none	False	0	False	GridWorld	ISR	FullObsDiscrete	Individual_Q		0.2	0.05	0.05	1	-100	1000
InitialDNN/232_23_2	none	none	False	0	False	GridWorld	ISR	FullObsDiscrete	Individual_Q		0.2	0.05	0.05	2	-100	1000
InitialDNN/233_23_3	none	none	False	0	False	GridWorld	ISR	FullObsDiscrete	Individual_Q		0.2	0.05	0.05	3	-100	1000
InitialDNN/234_23_4	none	none	False	0	False	GridWorld	ISR	FullObsDiscrete	Individual_Q		0.2	0.05	0.05	4	-100	1000
InitialDNN/235_23_5	none	none	False	0	False	GridWorld	ISR	FullObsDiscrete	Individual_Q		0.2	0.05	0.05	5	-100	1000
InitialDNN/236_23_6	none	none	False	0	False	GridWorld	ISR	FullObsDiscrete	Individual_Q		0.2	0.05	0.05	6	-100	1000
InitialDNN/237_23_7	none	none	False	0	False	GridWorld	ISR	FullObsDiscrete	Individual_Q		0.2	0.05	0.05	7	-100	1000
InitialDNN/238_23_8	none	none	False	0	False	GridWorld	ISR	FullObsDiscrete	Individual_Q		0.2	0.05	0.05	8	-100	1000
InitialDNN/239_23_9	none	none	False	0	False	GridWorld	ISR	FullObsDiscrete	Individual_Q		0.2	0.05	0.05	9	-100	1000
InitialDNN/240_24_0	centralized	none	True	-10	False	GridWorld	SUNY	FullObsDiscrete	Individual_Q		0.2	0.05	0	0	-30	1000
InitialDNN/241_24_1	centralized	none	True	-10	False	GridWorld	SUNY	FullObsDiscrete	Individual_Q		0.2	0.05	0	1	-30	1000
InitialDNN/242_24_2	centralized	none	True	-10	False	GridWorld	SUNY	FullObsDiscrete	Individual_Q		0.2	0.05	0	2	-30	1000
InitialDNN/243_24_3	centralized	none	True	-10	False	GridWorld	SUNY	FullObsDiscrete	Individual_Q		0.2	0.05	0	3	-30	1000
InitialDNN/244_24_4	centralized	none	True	-10	False	GridWorld	SUNY	FullObsDiscrete	Individual_Q		0.2	0.05	0	4	-30	1000
InitialDNN/245_24_5	centralized	none	True	-10	False	GridWorld	SUNY	FullObsDiscrete	Individual_Q		0.2	0.05	0	5	-30	1000
InitialDNN/246_24_6	centralized	none	True	-10	False	GridWorld	SUNY	FullObsDiscrete	Individual_Q		0.2	0.05	0	6	-30	1000
InitialDNN/247_24_7	centralized	none	True	-10	False	GridWorld	SUNY	FullObsDiscrete	Individual_Q		0.2	0.05	0	7	-30	1000
InitialDNN/248_24_8	centralized	none	True	-10	False	GridWorld	SUNY	FullObsDiscrete	Individual_Q		0.2	0.05	0	8	-30	1000
InitialDNN/249_24_9	centralized	none	True	-10	False	GridWorld	SUNY	FullObsDiscrete	Individual_Q		0.2	0.05	0	9	-30	1000
InitialDNN/250_25_0	none	none	False	0	False	GridWorld	SUNY	FullObsDiscrete	Individual_Q		0.2	0.05	0	0	0	1000
InitialDNN/251_25_1	none	none	False	0	False	GridWorld	SUNY	FullObsDiscrete	Individual_Q		0.2	0.05	0	1	0	1000
InitialDNN/252_25_2	none	none	False	0	False	GridWorld	SUNY	FullObsDiscrete	Individual_Q		0.2	0.05	0	2	0	1000
InitialDNN/253_25_3	none	none	False	0	False	GridWorld	SUNY	FullObsDiscrete	Individual_Q		0.2	0.05	0	3	0	1000
InitialDNN/254_25_4	none	none	False	0	False	GridWorld	SUNY	FullObsDiscrete	Individual_Q		0.2	0.05	0	4	0	1000
InitialDNN/255_25_5	none	none	False	0	False	GridWorld	SUNY	FullObsDiscrete	Individual_Q		0.2	0.05	0	5	0	1000
InitialDNN/256_25_6	none	none	False	0	False	GridWorld	SUNY	FullObsDiscrete	Individual_Q		0.2	0.05	0	6	0	1000
InitialDNN/257_25_7	none	none	False	0	False	GridWorld	SUNY	FullObsDiscrete	Individual_Q		0.2	0.05	0	7	0	1000
InitialDNN/258_25_8	none	none	False	0	False	GridWorld	SUNY	FullObsDiscrete	Individual_Q		0.2	0.05	0	8	0	1000
InitialDNN/259_25_9	none	none	False	0	False	GridWorld	SUNY	FullObsDiscrete	Individual_Q		0.2	0.05	0	9	0	1000
InitialDNN/260_26_0	none	none	False	0	False	GridWorld	SUNY	FullObsDiscrete	Individual_Q		0.2	0.05	0	0	-25	1000
InitialDNN/261_26_1	none	none	False	0	False	GridWorld	SUNY	FullObsDiscrete	Individual_Q		0.2	0.05	0	1	-25	1000
InitialDNN/262_26_2	none	none	False	0	False	GridWorld	SUNY	FullObsDiscrete	Individual_Q		0.2	0.05	0	2	-25	1000
InitialDNN/263_26_3	none	none	False	0	False	GridWorld	SUNY	FullObsDiscrete	Individual_Q		0.2	0.05	0	3	-25	1000
InitialDNN/264_26_4	none	none	False	0	False	GridWorld	SUNY	FullObsDiscrete	Individual_Q		0.2	0.05	0	4	-25	1000
InitialDNN/265_26_5	none	none	False	0	False	GridWorld	SUNY	FullObsDiscrete	Individual_Q		0.2	0.05	0	5	-25	1000
InitialDNN/266_26_6	none	none	False	0	False	GridWorld	SUNY	FullObsDiscrete	Individual_Q		0.2	0.05	0	6	-25	1000
InitialDNN/267_26_7	none	none	False	0	False	GridWorld	SUNY	FullObsDiscrete	Individual_Q		0.2	0.05	0	7	-25	1000
InitialDNN/268_26_8	none	none	False	0	False	GridWorld	SUNY	FullObsDiscrete	Individual_Q		0.2	0.05	0	8	-25	1000
InitialDNN/269_26_9	none	none	False	0	False	GridWorld	SUNY	FullObsDiscrete	Individual_Q		0.2	0.05	0	9	-25	1000
InitialDNN/270_27_0	none	none	False	0	False	GridWorld	SUNY	FullObsDiscrete	Individual_Q		0.2	0.05	0	0	-50	1000
InitialDNN/271_27_1	none	none	False	0	False	GridWorld	SUNY	FullObsDiscrete	Individual_Q		0.2	0.05	0	1	-50	1000
InitialDNN/272_27_2	none	none	False	0	False	GridWorld	SUNY	FullObsDiscrete	Individual_Q		0.2	0.05	0	2	-50	1000
InitialDNN/273_27_3	none	none	False	0	False	GridWorld	SUNY	FullObsDiscrete	Individual_Q		0.2	0.05	0	3	-50	1000
InitialDNN/274_27_4	none	none	False	0	False	GridWorld	SUNY	FullObsDiscrete	Individual_Q		0.2	0.05	0	4	-50	1000
InitialDNN/275_27_5	none	none	False	0	False	GridWorld	SUNY	FullObsDiscrete	Individual_Q		0.2	0.05	0	5	-50	1000
InitialDNN/276_27_6	none	none	False	0	False	GridWorld	SUNY	FullObsDiscrete	Individual_Q		0.2	0.05	0	6	-50	1000
InitialDNN/277_27_7	none	none	False	0	False	GridWorld	SUNY	FullObsDiscrete	Individual_Q		0.2	0.05	0	7	-50	1000
InitialDNN/278_27_8	none	none	False	0	False	GridWorld	SUNY	FullObsDiscrete	Individual_Q		0.2	0.05	0	8	-50	1000
InitialDNN/279_27_9	none	none	False	0	False	GridWorld	SUNY	FullObsDiscrete	Individual_Q		0.2	0.05	0	9	-50	1000
InitialDNN/280_28_0	none	none	False	0	False	GridWorld	SUNY	FullObsDiscrete	Individual_Q		0.2	0.05	0	0	-75	1000
InitialDNN/281_28_1	none	none	False	0	False	GridWorld	SUNY	FullObsDiscrete	Individual_Q		0.2	0.05	0	1	-75	1000
InitialDNN/282_28_2	none	none	False	0	False	GridWorld	SUNY	FullObsDiscrete	Individual_Q		0.2	0.05	0	2	-75	1000
InitialDNN/283_28_3	none	none	False	0	False	GridWorld	SUNY	FullObsDiscrete	Individual_Q		0.2	0.05	0	3	-75	1000
InitialDNN/284_28_4	none	none	False	0	False	GridWorld	SUNY	FullObsDiscrete	Individual_Q		0.2	0.05	0	4	-75	1000
InitialDNN/285_28_5	none	none	False	0	False	GridWorld	SUNY	FullObsDiscrete	Individual_Q		0.2	0.05	0	5	-75	1000
InitialDNN/286_28_6	none	none	False	0	False	GridWorld	SUNY	FullObsDiscrete	Individual_Q		0.2	0.05	0	6	-75	1000
InitialDNN/287_28_7	none	none	False	0	False	GridWorld	SUNY	FullObsDiscrete	Individual_Q		0.2	0.05	0	7	-75	1000
InitialDNN/288_28_8	none	none	False	0	False	GridWorld	SUNY	FullObsDiscrete	Individual_Q		0.2	0.05	0	8	-75	1000
InitialDNN/289_28_9	none	none	False	0	False	GridWorld	SUNY	FullObsDiscrete	Individual_Q		0.2	0.05	0	9	-75	1000
InitialDNN/290_29_0	none	none	False	0	False	GridWorld	SUNY	FullObsDiscrete	Individual_Q		0.2	0.05	0	0	-100	1000
InitialDNN/291_29_1	none	none	False	0	False	GridWorld	SUNY	FullObsDiscrete	Individual_Q		0.2	0.05	0	1	-100	1000
InitialDNN/292_29_2	none	none	False	0	False	GridWorld	SUNY	FullObsDiscrete	Individual_Q		0.2	0.05	0	2	-100	1000
InitialDNN/293_29_3	none	none	False	0	False	GridWorld	SUNY	FullObsDiscrete	Individual_Q		0.2	0.05	0	3	-100	1000
InitialDNN/294_29_4	none	none	False	0	False	GridWorld	SUNY	FullObsDiscrete	Individual_Q		0.2	0.05	0	4	-100	1000
InitialDNN/295_29_5	none	none	False	0	False	GridWorld	SUNY	FullObsDiscrete	Individual_Q		0.2	0.05	0	5	-100	1000
InitialDNN/296_29_6	none	none	False	0	False	GridWorld	SUNY	FullObsDiscrete	Individual_Q		0.2	0.05	0	6	-100	1000
InitialDNN/297_29_7	none	none	False	0	False	GridWorld	SUNY	FullObsDiscrete	Individual_Q		0.2	0.05	0	7	-100	1000
InitialDNN/298_29_8	none	none	False	0	False	GridWorld	SUNY	FullObsDiscrete	Individual_Q		0.2	0.05	0	8	-100	1000
InitialDNN/299_29_9	none	none	False	0	False	GridWorld	SUNY	FullObsDiscrete	Individual_Q		0.2	0.05	0	9	-100	1000
InitialDNN/300_30_0	centralized	none	True	-10	False	GridWorld	SUNY	FullObsDiscrete	Individual_Q		0.2	0.05	0.05	0	-30	1000
InitialDNN/301_30_1	centralized	none	True	-10	False	GridWorld	SUNY	FullObsDiscrete	Individual_Q		0.2	0.05	0.05	1	-30	1000
InitialDNN/302_30_2	centralized	none	True	-10	False	GridWorld	SUNY	FullObsDiscrete	Individual_Q		0.2	0.05	0.05	2	-30	1000
InitialDNN/303_30_3	centralized	none	True	-10	False	GridWorld	SUNY	FullObsDiscrete	Individual_Q		0.2	0.05	0.05	3	-30	1000
InitialDNN/304_30_4	centralized	none	True	-10	False	GridWorld	SUNY	FullObsDiscrete	Individual_Q		0.2	0.05	0.05	4	-30	1000
InitialDNN/305_30_5	centralized	none	True	-10	False	GridWorld	SUNY	FullObsDiscrete	Individual_Q		0.2	0.05	0.05	5	-30	1000
InitialDNN/306_30_6	centralized	none	True	-10	False	GridWorld	SUNY	FullObsDiscrete	Individual_Q		0.2	0.05	0.05	6	-30	1000
InitialDNN/307_30_7	centralized	none	True	-10	False	GridWorld	SUNY	FullObsDiscrete	Individual_Q		0.2	0.05	0.05	7	-30	1000
InitialDNN/308_30_8	centralized	none	True	-10	False	GridWorld	SUNY	FullObsDiscrete	Individual_Q		0.2	0.05	0.05	8	-30	1000
InitialDNN/309_30_9	centralized	none	True	-10	False	GridWorld	SUNY	FullObsDiscrete	Individual_Q		0.2	0.05	0.05	9	-30	1000
InitialDNN/310_31_0	none	none	False	0	False	GridWorld	SUNY	FullObsDiscrete	Individual_Q		0.2	0.05	0.05	0	0	1000
InitialDNN/311_31_1	none	none	False	0	False	GridWorld	SUNY	FullObsDiscrete	Individual_Q		0.2	0.05	0.05	1	0	1000
InitialDNN/312_31_2	none	none	False	0	False	GridWorld	SUNY	FullObsDiscrete	Individual_Q		0.2	0.05	0.05	2	0	1000
InitialDNN/313_31_3	none	none	False	0	False	GridWorld	SUNY	FullObsDiscrete	Individual_Q		0.2	0.05	0.05	3	0	1000
InitialDNN/314_31_4	none	none	False	0	False	GridWorld	SUNY	FullObsDiscrete	Individual_Q		0.2	0.05	0.05	4	0	1000
InitialDNN/315_31_5	none	none	False	0	False	GridWorld	SUNY	FullObsDiscrete	Individual_Q		0.2	0.05	0.05	5	0	1000
InitialDNN/316_31_6	none	none	False	0	False	GridWorld	SUNY	FullObsDiscrete	Individual_Q		0.2	0.05	0.05	6	0	1000
InitialDNN/317_31_7	none	none	False	0	False	GridWorld	SUNY	FullObsDiscrete	Individual_Q		0.2	0.05	0.05	7	0	1000
InitialDNN/318_31_8	none	none	False	0	False	GridWorld	SUNY	FullObsDiscrete	Individual_Q		0.2	0.05	0.05	8	0	1000
InitialDNN/319_31_9	none	none	False	0	False	GridWorld	SUNY	FullObsDiscrete	Individual_Q		0.2	0.05	0.05	9	0	1000
InitialDNN/320_32_0	none	none	False	0	False	GridWorld	SUNY	FullObsDiscrete	Individual_Q		0.2	0.05	0.05	0	-25	1000
InitialDNN/321_32_1	none	none	False	0	False	GridWorld	SUNY	FullObsDiscrete	Individual_Q		0.2	0.05	0.05	1	-25	1000
InitialDNN/322_32_2	none	none	False	0	False	GridWorld	SUNY	FullObsDiscrete	Individual_Q		0.2	0.05	0.05	2	-25	1000
InitialDNN/323_32_3	none	none	False	0	False	GridWorld	SUNY	FullObsDiscrete	Individual_Q		0.2	0.05	0.05	3	-25	1000
InitialDNN/324_32_4	none	none	False	0	False	GridWorld	SUNY	FullObsDiscrete	Individual_Q		0.2	0.05	0.05	4	-25	1000
InitialDNN/325_32_5	none	none	False	0	False	GridWorld	SUNY	FullObsDiscrete	Individual_Q		0.2	0.05	0.05	5	-25	1000
InitialDNN/326_32_6	none	none	False	0	False	GridWorld	SUNY	FullObsDiscrete	Individual_Q		0.2	0.05	0.05	6	-25	1000
InitialDNN/327_32_7	none	none	False	0	False	GridWorld	SUNY	FullObsDiscrete	Individual_Q		0.2	0.05	0.05	7	-25	1000
InitialDNN/328_32_8	none	none	False	0	False	GridWorld	SUNY	FullObsDiscrete	Individual_Q		0.2	0.05	0.05	8	-25	1000
InitialDNN/329_32_9	none	none	False	0	False	GridWorld	SUNY	FullObsDiscrete	Individual_Q		0.2	0.05	0.05	9	-25	1000
InitialDNN/330_33_0	none	none	False	0	False	GridWorld	SUNY	FullObsDiscrete	Individual_Q		0.2	0.05	0.05	0	-50	1000
InitialDNN/331_33_1	none	none	False	0	False	GridWorld	SUNY	FullObsDiscrete	Individual_Q		0.2	0.05	0.05	1	-50	1000
InitialDNN/332_33_2	none	none	False	0	False	GridWorld	SUNY	FullObsDiscrete	Individual_Q		0.2	0.05	0.05	2	-50	1000
InitialDNN/333_33_3	none	none	False	0	False	GridWorld	SUNY	FullObsDiscrete	Individual_Q		0.2	0.05	0.05	3	-50	1000
InitialDNN/334_33_4	none	none	False	0	False	GridWorld	SUNY	FullObsDiscrete	Individual_Q		0.2	0.05	0.05	4	-50	1000
InitialDNN/335_33_5	none	none	False	0	False	GridWorld	SUNY	FullObsDiscrete	Individual_Q		0.2	0.05	0.05	5	-50	1000
InitialDNN/336_33_6	none	none	False	0	False	GridWorld	SUNY	FullObsDiscrete	Individual_Q		0.2	0.05	0.05	6	-50	1000
InitialDNN/337_33_7	none	none	False	0	False	GridWorld	SUNY	FullObsDiscrete	Individual_Q		0.2	0.05	0.05	7	-50	1000
InitialDNN/338_33_8	none	none	False	0	False	GridWorld	SUNY	FullObsDiscrete	Individual_Q		0.2	0.05	0.05	8	-50	1000
InitialDNN/339_33_9	none	none	False	0	False	GridWorld	SUNY	FullObsDiscrete	Individual_Q		0.2	0.05	0.05	9	-50	1000
InitialDNN/340_34_0	none	none	False	0	False	GridWorld	SUNY	FullObsDiscrete	Individual_Q		0.2	0.05	0.05	0	-75	1000
InitialDNN/341_34_1	none	none	False	0	False	GridWorld	SUNY	FullObsDiscrete	Individual_Q		0.2	0.05	0.05	1	-75	1000
InitialDNN/342_34_2	none	none	False	0	False	GridWorld	SUNY	FullObsDiscrete	Individual_Q		0.2	0.05	0.05	2	-75	1000
InitialDNN/343_34_3	none	none	False	0	False	GridWorld	SUNY	FullObsDiscrete	Individual_Q		0.2	0.05	0.05	3	-75	1000
InitialDNN/344_34_4	none	none	False	0	False	GridWorld	SUNY	FullObsDiscrete	Individual_Q		0.2	0.05	0.05	4	-75	1000
InitialDNN/345_34_5	none	none	False	0	False	GridWorld	SUNY	FullObsDiscrete	Individual_Q		0.2	0.05	0.05	5	-75	1000
InitialDNN/346_34_6	none	none	False	0	False	GridWorld	SUNY	FullObsDiscrete	Individual_Q		0.2	0.05	0.05	6	-75	1000
InitialDNN/347_34_7	none	none	False	0	False	GridWorld	SUNY	FullObsDiscrete	Individual_Q		0.2	0.05	0.05	7	-75	1000
InitialDNN/348_34_8	none	none	False	0	False	GridWorld	SUNY	FullObsDiscrete	Individual_Q		0.2	0.05	0.05	8	-75	1000
InitialDNN/349_34_9	none	none	False	0	False	GridWorld	SUNY	FullObsDiscrete	Individual_Q		0.2	0.05	0.05	9	-75	1000
InitialDNN/350_35_0	none	none	False	0	False	GridWorld	SUNY	FullObsDiscrete	Individual_Q		0.2	0.05	0.05	0	-100	1000
InitialDNN/351_35_1	none	none	False	0	False	GridWorld	SUNY	FullObsDiscrete	Individual_Q		0.2	0.05	0.05	1	-100	1000
InitialDNN/352_35_2	none	none	False	0	False	GridWorld	SUNY	FullObsDiscrete	Individual_Q		0.2	0.05	0.05	2	-100	1000
InitialDNN/353_35_3	none	none	False	0	False	GridWorld	SUNY	FullObsDiscrete	Individual_Q		0.2	0.05	0.05	3	-100	1000
InitialDNN/354_35_4	none	none	False	0	False	GridWorld	SUNY	FullObsDiscrete	Individual_Q		0.2	0.05	0.05	4	-100	1000
InitialDNN/355_35_5	none	none	False	0	False	GridWorld	SUNY	FullObsDiscrete	Individual_Q		0.2	0.05	0.05	5	-100	1000
InitialDNN/356_35_6	none	none	False	0	False	GridWorld	SUNY	FullObsDiscrete	Individual_Q		0.2	0.05	0.05	6	-100	1000
InitialDNN/357_35_7	none	none	False	0	False	GridWorld	SUNY	FullObsDiscrete	Individual_Q		0.2	0.05	0.05	7	-100	1000
InitialDNN/358_35_8	none	none	False	0	False	GridWorld	SUNY	FullObsDiscrete	Individual_Q		0.2	0.05	0.05	8	-100	1000
InitialDNN/359_35_9	none	none	False	0	False	GridWorld	SUNY	FullObsDiscrete	Individual_Q		0.2	0.05	0.05	9	-100	1000
InitialDNN/360_36_0	centralized	none	True	-10	False	GridWorld	MIT	FullObsDiscrete	Individual_Q		0.2	0.05	0	0	-30	1000
InitialDNN/361_36_1	centralized	none	True	-10	False	GridWorld	MIT	FullObsDiscrete	Individual_Q		0.2	0.05	0	1	-30	1000
InitialDNN/362_36_2	centralized	none	True	-10	False	GridWorld	MIT	FullObsDiscrete	Individual_Q		0.2	0.05	0	2	-30	1000
InitialDNN/363_36_3	centralized	none	True	-10	False	GridWorld	MIT	FullObsDiscrete	Individual_Q		0.2	0.05	0	3	-30	1000
InitialDNN/364_36_4	centralized	none	True	-10	False	GridWorld	MIT	FullObsDiscrete	Individual_Q		0.2	0.05	0	4	-30	1000
InitialDNN/365_36_5	centralized	none	True	-10	False	GridWorld	MIT	FullObsDiscrete	Individual_Q		0.2	0.05	0	5	-30	1000
InitialDNN/366_36_6	centralized	none	True	-10	False	GridWorld	MIT	FullObsDiscrete	Individual_Q		0.2	0.05	0	6	-30	1000
InitialDNN/367_36_7	centralized	none	True	-10	False	GridWorld	MIT	FullObsDiscrete	Individual_Q		0.2	0.05	0	7	-30	1000
InitialDNN/368_36_8	centralized	none	True	-10	False	GridWorld	MIT	FullObsDiscrete	Individual_Q		0.2	0.05	0	8	-30	1000
InitialDNN/369_36_9	centralized	none	True	-10	False	GridWorld	MIT	FullObsDiscrete	Individual_Q		0.2	0.05	0	9	-30	1000
InitialDNN/370_37_0	none	none	False	0	False	GridWorld	MIT	FullObsDiscrete	Individual_Q		0.2	0.05	0	0	0	1000
InitialDNN/371_37_1	none	none	False	0	False	GridWorld	MIT	FullObsDiscrete	Individual_Q		0.2	0.05	0	1	0	1000
InitialDNN/372_37_2	none	none	False	0	False	GridWorld	MIT	FullObsDiscrete	Individual_Q		0.2	0.05	0	2	0	1000
InitialDNN/373_37_3	none	none	False	0	False	GridWorld	MIT	FullObsDiscrete	Individual_Q		0.2	0.05	0	3	0	1000
InitialDNN/374_37_4	none	none	False	0	False	GridWorld	MIT	FullObsDiscrete	Individual_Q		0.2	0.05	0	4	0	1000
InitialDNN/375_37_5	none	none	False	0	False	GridWorld	MIT	FullObsDiscrete	Individual_Q		0.2	0.05	0	5	0	1000
InitialDNN/376_37_6	none	none	False	0	False	GridWorld	MIT	FullObsDiscrete	Individual_Q		0.2	0.05	0	6	0	1000
InitialDNN/377_37_7	none	none	False	0	False	GridWorld	MIT	FullObsDiscrete	Individual_Q		0.2	0.05	0	7	0	1000
InitialDNN/378_37_8	none	none	False	0	False	GridWorld	MIT	FullObsDiscrete	Individual_Q		0.2	0.05	0	8	0	1000
InitialDNN/379_37_9	none	none	False	0	False	GridWorld	MIT	FullObsDiscrete	Individual_Q		0.2	0.05	0	9	0	1000
InitialDNN/380_38_0	none	none	False	0	False	GridWorld	MIT	FullObsDiscrete	Individual_Q		0.2	0.05	0	0	-25	1000
InitialDNN/381_38_1	none	none	False	0	False	GridWorld	MIT	FullObsDiscrete	Individual_Q		0.2	0.05	0	1	-25	1000
InitialDNN/382_38_2	none	none	False	0	False	GridWorld	MIT	FullObsDiscrete	Individual_Q		0.2	0.05	0	2	-25	1000
InitialDNN/383_38_3	none	none	False	0	False	GridWorld	MIT	FullObsDiscrete	Individual_Q		0.2	0.05	0	3	-25	1000
InitialDNN/384_38_4	none	none	False	0	False	GridWorld	MIT	FullObsDiscrete	Individual_Q		0.2	0.05	0	4	-25	1000
InitialDNN/385_38_5	none	none	False	0	False	GridWorld	MIT	FullObsDiscrete	Individual_Q		0.2	0.05	0	5	-25	1000
InitialDNN/386_38_6	none	none	False	0	False	GridWorld	MIT	FullObsDiscrete	Individual_Q		0.2	0.05	0	6	-25	1000
InitialDNN/387_38_7	none	none	False	0	False	GridWorld	MIT	FullObsDiscrete	Individual_Q		0.2	0.05	0	7	-25	1000
InitialDNN/388_38_8	none	none	False	0	False	GridWorld	MIT	FullObsDiscrete	Individual_Q		0.2	0.05	0	8	-25	1000
InitialDNN/389_38_9	none	none	False	0	False	GridWorld	MIT	FullObsDiscrete	Individual_Q		0.2	0.05	0	9	-25	1000
InitialDNN/390_39_0	none	none	False	0	False	GridWorld	MIT	FullObsDiscrete	Individual_Q		0.2	0.05	0	0	-50	1000
InitialDNN/391_39_1	none	none	False	0	False	GridWorld	MIT	FullObsDiscrete	Individual_Q		0.2	0.05	0	1	-50	1000
InitialDNN/392_39_2	none	none	False	0	False	GridWorld	MIT	FullObsDiscrete	Individual_Q		0.2	0.05	0	2	-50	1000
InitialDNN/393_39_3	none	none	False	0	False	GridWorld	MIT	FullObsDiscrete	Individual_Q		0.2	0.05	0	3	-50	1000
InitialDNN/394_39_4	none	none	False	0	False	GridWorld	MIT	FullObsDiscrete	Individual_Q		0.2	0.05	0	4	-50	1000
InitialDNN/395_39_5	none	none	False	0	False	GridWorld	MIT	FullObsDiscrete	Individual_Q		0.2	0.05	0	5	-50	1000
InitialDNN/396_39_6	none	none	False	0	False	GridWorld	MIT	FullObsDiscrete	Individual_Q		0.2	0.05	0	6	-50	1000
InitialDNN/397_39_7	none	none	False	0	False	GridWorld	MIT	FullObsDiscrete	Individual_Q		0.2	0.05	0	7	-50	1000
InitialDNN/398_39_8	none	none	False	0	False	GridWorld	MIT	FullObsDiscrete	Individual_Q		0.2	0.05	0	8	-50	1000
InitialDNN/399_39_9	none	none	False	0	False	GridWorld	MIT	FullObsDiscrete	Individual_Q		0.2	0.05	0	9	-50	1000
InitialDNN/400_40_0	none	none	False	0	False	GridWorld	MIT	FullObsDiscrete	Individual_Q		0.2	0.05	0	0	-75	1000
InitialDNN/401_40_1	none	none	False	0	False	GridWorld	MIT	FullObsDiscrete	Individual_Q		0.2	0.05	0	1	-75	1000
InitialDNN/402_40_2	none	none	False	0	False	GridWorld	MIT	FullObsDiscrete	Individual_Q		0.2	0.05	0	2	-75	1000
InitialDNN/403_40_3	none	none	False	0	False	GridWorld	MIT	FullObsDiscrete	Individual_Q		0.2	0.05	0	3	-75	1000
InitialDNN/404_40_4	none	none	False	0	False	GridWorld	MIT	FullObsDiscrete	Individual_Q		0.2	0.05	0	4	-75	1000
InitialDNN/405_40_5	none	none	False	0	False	GridWorld	MIT	FullObsDiscrete	Individual_Q		0.2	0.05	0	5	-75	1000
InitialDNN/406_40_6	none	none	False	0	False	GridWorld	MIT	FullObsDiscrete	Individual_Q		0.2	0.05	0	6	-75	1000
InitialDNN/407_40_7	none	none	False	0	False	GridWorld	MIT	FullObsDiscrete	Individual_Q		0.2	0.05	0	7	-75	1000
InitialDNN/408_40_8	none	none	False	0	False	GridWorld	MIT	FullObsDiscrete	Individual_Q		0.2	0.05	0	8	-75	1000
InitialDNN/409_40_9	none	none	False	0	False	GridWorld	MIT	FullObsDiscrete	Individual_Q		0.2	0.05	0	9	-75	1000
InitialDNN/410_41_0	none	none	False	0	False	GridWorld	MIT	FullObsDiscrete	Individual_Q		0.2	0.05	0	0	-100	1000
InitialDNN/411_41_1	none	none	False	0	False	GridWorld	MIT	FullObsDiscrete	Individual_Q		0.2	0.05	0	1	-100	1000
InitialDNN/412_41_2	none	none	False	0	False	GridWorld	MIT	FullObsDiscrete	Individual_Q		0.2	0.05	0	2	-100	1000
InitialDNN/413_41_3	none	none	False	0	False	GridWorld	MIT	FullObsDiscrete	Individual_Q		0.2	0.05	0	3	-100	1000
InitialDNN/414_41_4	none	none	False	0	False	GridWorld	MIT	FullObsDiscrete	Individual_Q		0.2	0.05	0	4	-100	1000
InitialDNN/415_41_5	none	none	False	0	False	GridWorld	MIT	FullObsDiscrete	Individual_Q		0.2	0.05	0	5	-100	1000
InitialDNN/416_41_6	none	none	False	0	False	GridWorld	MIT	FullObsDiscrete	Individual_Q		0.2	0.05	0	6	-100	1000
InitialDNN/417_41_7	none	none	False	0	False	GridWorld	MIT	FullObsDiscrete	Individual_Q		0.2	0.05	0	7	-100	1000
InitialDNN/418_41_8	none	none	False	0	False	GridWorld	MIT	FullObsDiscrete	Individual_Q		0.2	0.05	0	8	-100	1000
InitialDNN/419_41_9	none	none	False	0	False	GridWorld	MIT	FullObsDiscrete	Individual_Q		0.2	0.05	0	9	-100	1000
InitialDNN/420_42_0	centralized	none	True	-10	False	GridWorld	MIT	FullObsDiscrete	Individual_Q		0.2	0.05	0.05	0	-30	1000
InitialDNN/421_42_1	centralized	none	True	-10	False	GridWorld	MIT	FullObsDiscrete	Individual_Q		0.2	0.05	0.05	1	-30	1000
InitialDNN/422_42_2	centralized	none	True	-10	False	GridWorld	MIT	FullObsDiscrete	Individual_Q		0.2	0.05	0.05	2	-30	1000
InitialDNN/423_42_3	centralized	none	True	-10	False	GridWorld	MIT	FullObsDiscrete	Individual_Q		0.2	0.05	0.05	3	-30	1000
InitialDNN/424_42_4	centralized	none	True	-10	False	GridWorld	MIT	FullObsDiscrete	Individual_Q		0.2	0.05	0.05	4	-30	1000
InitialDNN/425_42_5	centralized	none	True	-10	False	GridWorld	MIT	FullObsDiscrete	Individual_Q		0.2	0.05	0.05	5	-30	1000
InitialDNN/426_42_6	centralized	none	True	-10	False	GridWorld	MIT	FullObsDiscrete	Individual_Q		0.2	0.05	0.05	6	-30	1000
InitialDNN/427_42_7	centralized	none	True	-10	False	GridWorld	MIT	FullObsDiscrete	Individual_Q		0.2	0.05	0.05	7	-30	1000
InitialDNN/428_42_8	centralized	none	True	-10	False	GridWorld	MIT	FullObsDiscrete	Individual_Q		0.2	0.05	0.05	8	-30	1000
InitialDNN/429_42_9	centralized	none	True	-10	False	GridWorld	MIT	FullObsDiscrete	Individual_Q		0.2	0.05	0.05	9	-30	1000
InitialDNN/430_43_0	none	none	False	0	False	GridWorld	MIT	FullObsDiscrete	Individual_Q		0.2	0.05	0.05	0	0	1000
InitialDNN/431_43_1	none	none	False	0	False	GridWorld	MIT	FullObsDiscrete	Individual_Q		0.2	0.05	0.05	1	0	1000
InitialDNN/432_43_2	none	none	False	0	False	GridWorld	MIT	FullObsDiscrete	Individual_Q		0.2	0.05	0.05	2	0	1000
InitialDNN/433_43_3	none	none	False	0	False	GridWorld	MIT	FullObsDiscrete	Individual_Q		0.2	0.05	0.05	3	0	1000
InitialDNN/434_43_4	none	none	False	0	False	GridWorld	MIT	FullObsDiscrete	Individual_Q		0.2	0.05	0.05	4	0	1000
InitialDNN/435_43_5	none	none	False	0	False	GridWorld	MIT	FullObsDiscrete	Individual_Q		0.2	0.05	0.05	5	0	1000
InitialDNN/436_43_6	none	none	False	0	False	GridWorld	MIT	FullObsDiscrete	Individual_Q		0.2	0.05	0.05	6	0	1000
InitialDNN/437_43_7	none	none	False	0	False	GridWorld	MIT	FullObsDiscrete	Individual_Q		0.2	0.05	0.05	7	0	1000
InitialDNN/438_43_8	none	none	False	0	False	GridWorld	MIT	FullObsDiscrete	Individual_Q		0.2	0.05	0.05	8	0	1000
InitialDNN/439_43_9	none	none	False	0	False	GridWorld	MIT	FullObsDiscrete	Individual_Q		0.2	0.05	0.05	9	0	1000
InitialDNN/440_44_0	none	none	False	0	False	GridWorld	MIT	FullObsDiscrete	Individual_Q		0.2	0.05	0.05	0	-25	1000
InitialDNN/441_44_1	none	none	False	0	False	GridWorld	MIT	FullObsDiscrete	Individual_Q		0.2	0.05	0.05	1	-25	1000
InitialDNN/442_44_2	none	none	False	0	False	GridWorld	MIT	FullObsDiscrete	Individual_Q		0.2	0.05	0.05	2	-25	1000
InitialDNN/443_44_3	none	none	False	0	False	GridWorld	MIT	FullObsDiscrete	Individual_Q		0.2	0.05	0.05	3	-25	1000
InitialDNN/444_44_4	none	none	False	0	False	GridWorld	MIT	FullObsDiscrete	Individual_Q		0.2	0.05	0.05	4	-25	1000
InitialDNN/445_44_5	none	none	False	0	False	GridWorld	MIT	FullObsDiscrete	Individual_Q		0.2	0.05	0.05	5	-25	1000
InitialDNN/446_44_6	none	none	False	0	False	GridWorld	MIT	FullObsDiscrete	Individual_Q		0.2	0.05	0.05	6	-25	1000
InitialDNN/447_44_7	none	none	False	0	False	GridWorld	MIT	FullObsDiscrete	Individual_Q		0.2	0.05	0.05	7	-25	1000
InitialDNN/448_44_8	none	none	False	0	False	GridWorld	MIT	FullObsDiscrete	Individual_Q		0.2	0.05	0.05	8	-25	1000
InitialDNN/449_44_9	none	none	False	0	False	GridWorld	MIT	FullObsDiscrete	Individual_Q		0.2	0.05	0.05	9	-25	1000
InitialDNN/450_45_0	none	none	False	0	False	GridWorld	MIT	FullObsDiscrete	Individual_Q		0.2	0.05	0.05	0	-50	1000
InitialDNN/451_45_1	none	none	False	0	False	GridWorld	MIT	FullObsDiscrete	Individual_Q		0.2	0.05	0.05	1	-50	1000
InitialDNN/452_45_2	none	none	False	0	False	GridWorld	MIT	FullObsDiscrete	Individual_Q		0.2	0.05	0.05	2	-50	1000
InitialDNN/453_45_3	none	none	False	0	False	GridWorld	MIT	FullObsDiscrete	Individual_Q		0.2	0.05	0.05	3	-50	1000
InitialDNN/454_45_4	none	none	False	0	False	GridWorld	MIT	FullObsDiscrete	Individual_Q		0.2	0.05	0.05	4	-50	1000
InitialDNN/455_45_5	none	none	False	0	False	GridWorld	MIT	FullObsDiscrete	Individual_Q		0.2	0.05	0.05	5	-50	1000
InitialDNN/456_45_6	none	none	False	0	False	GridWorld	MIT	FullObsDiscrete	Individual_Q		0.2	0.05	0.05	6	-50	1000
InitialDNN/457_45_7	none	none	False	0	False	GridWorld	MIT	FullObsDiscrete	Individual_Q		0.2	0.05	0.05	7	-50	1000
InitialDNN/458_45_8	none	none	False	0	False	GridWorld	MIT	FullObsDiscrete	Individual_Q		0.2	0.05	0.05	8	-50	1000
InitialDNN/459_45_9	none	none	False	0	False	GridWorld	MIT	FullObsDiscrete	Individual_Q		0.2	0.05	0.05	9	-50	1000
InitialDNN/460_46_0	none	none	False	0	False	GridWorld	MIT	FullObsDiscrete	Individual_Q		0.2	0.05	0.05	0	-75	1000
InitialDNN/461_46_1	none	none	False	0	False	GridWorld	MIT	FullObsDiscrete	Individual_Q		0.2	0.05	0.05	1	-75	1000
InitialDNN/462_46_2	none	none	False	0	False	GridWorld	MIT	FullObsDiscrete	Individual_Q		0.2	0.05	0.05	2	-75	1000
InitialDNN/463_46_3	none	none	False	0	False	GridWorld	MIT	FullObsDiscrete	Individual_Q		0.2	0.05	0.05	3	-75	1000
InitialDNN/464_46_4	none	none	False	0	False	GridWorld	MIT	FullObsDiscrete	Individual_Q		0.2	0.05	0.05	4	-75	1000
InitialDNN/465_46_5	none	none	False	0	False	GridWorld	MIT	FullObsDiscrete	Individual_Q		0.2	0.05	0.05	5	-75	1000
InitialDNN/466_46_6	none	none	False	0	False	GridWorld	MIT	FullObsDiscrete	Individual_Q		0.2	0.05	0.05	6	-75	1000
InitialDNN/467_46_7	none	none	False	0	False	GridWorld	MIT	FullObsDiscrete	Individual_Q		0.2	0.05	0.05	7	-75	1000
InitialDNN/468_46_8	none	none	False	0	False	GridWorld	MIT	FullObsDiscrete	Individual_Q		0.2	0.05	0.05	8	-75	1000
InitialDNN/469_46_9	none	none	False	0	False	GridWorld	MIT	FullObsDiscrete	Individual_Q		0.2	0.05	0.05	9	-75	1000
InitialDNN/470_47_0	none	none	False	0	False	GridWorld	MIT	FullObsDiscrete	Individual_Q		0.2	0.05	0.05	0	-100	1000
InitialDNN/471_47_1	none	none	False	0	False	GridWorld	MIT	FullObsDiscrete	Individual_Q		0.2	0.05	0.05	1	-100	1000
InitialDNN/472_47_2	none	none	False	0	False	GridWorld	MIT	FullObsDiscrete	Individual_Q		0.2	0.05	0.05	2	-100	1000
InitialDNN/473_47_3	none	none	False	0	False	GridWorld	MIT	FullObsDiscrete	Individual_Q		0.2	0.05	0.05	3	-100	1000
InitialDNN/474_47_4	none	none	False	0	False	GridWorld	MIT	FullObsDiscrete	Individual_Q		0.2	0.05	0.05	4	-100	1000
InitialDNN/475_47_5	none	none	False	0	False	GridWorld	MIT	FullObsDiscrete	Individual_Q		0.2	0.05	0.05	5	-100	1000
InitialDNN/476_47_6	none	none	False	0	False	GridWorld	MIT	FullObsDiscrete	Individual_Q		0.2	0.05	0.05	6	-100	1000
InitialDNN/477_47_7	none	none	False	0	False	GridWorld	MIT	FullObsDiscrete	Individual_Q		0.2	0.05	0.05	7	-100	1000
InitialDNN/478_47_8	none	none	False	0	False	GridWorld	MIT	FullObsDiscrete	Individual_Q		0.2	0.05	0.05	8	-100	1000
InitialDNN/479_47_9	none	none	False	0	False	GridWorld	MIT	FullObsDiscrete	Individual_Q		0.2	0.05	0.05	9	-100	1000
InitialDNN/480_48_0	centralized	none	True	-10	False	GridWorld	Pentagon	2DObs	Individual_Deep_Q	simple_mlp	0.2	0.05	0	0	-30	1000
InitialDNN/481_48_1	centralized	none	True	-10	False	GridWorld	Pentagon	2DObs	Individual_Deep_Q	simple_mlp	0.2	0.05	0	1	-30	1000
InitialDNN/482_48_2	centralized	none	True	-10	False	GridWorld	Pentagon	2DObs	Individual_Deep_Q	simple_mlp	0.2	0.05	0	2	-30	1000
InitialDNN/483_48_3	centralized	none	True	-10	False	GridWorld	Pentagon	2DObs	Individual_Deep_Q	simple_mlp	0.2	0.05	0	3	-30	1000
InitialDNN/484_48_4	centralized	none	True	-10	False	GridWorld	Pentagon	2DObs	Individual_Deep_Q	simple_mlp	0.2	0.05	0	4	-30	1000
InitialDNN/485_48_5	centralized	none	True	-10	False	GridWorld	Pentagon	2DObs	Individual_Deep_Q	simple_mlp	0.2	0.05	0	5	-30	1000
InitialDNN/486_48_6	centralized	none	True	-10	False	GridWorld	Pentagon	2DObs	Individual_Deep_Q	simple_mlp	0.2	0.05	0	6	-30	1000
InitialDNN/487_48_7	centralized	none	True	-10	False	GridWorld	Pentagon	2DObs	Individual_Deep_Q	simple_mlp	0.2	0.05	0	7	-30	1000
InitialDNN/488_48_8	centralized	none	True	-10	False	GridWorld	Pentagon	2DObs	Individual_Deep_Q	simple_mlp	0.2	0.05	0	8	-30	1000
InitialDNN/489_48_9	centralized	none	True	-10	False	GridWorld	Pentagon	2DObs	Individual_Deep_Q	simple_mlp	0.2	0.05	0	9	-30	1000
InitialDNN/490_49_0	none	none	False	0	False	GridWorld	Pentagon	2DObs	Individual_Deep_Q	simple_mlp	0.2	0.05	0	0	0	1000
InitialDNN/491_49_1	none	none	False	0	False	GridWorld	Pentagon	2DObs	Individual_Deep_Q	simple_mlp	0.2	0.05	0	1	0	1000
InitialDNN/492_49_2	none	none	False	0	False	GridWorld	Pentagon	2DObs	Individual_Deep_Q	simple_mlp	0.2	0.05	0	2	0	1000
InitialDNN/493_49_3	none	none	False	0	False	GridWorld	Pentagon	2DObs	Individual_Deep_Q	simple_mlp	0.2	0.05	0	3	0	1000
InitialDNN/494_49_4	none	none	False	0	False	GridWorld	Pentagon	2DObs	Individual_Deep_Q	simple_mlp	0.2	0.05	0	4	0	1000
InitialDNN/495_49_5	none	none	False	0	False	GridWorld	Pentagon	2DObs	Individual_Deep_Q	simple_mlp	0.2	0.05	0	5	0	1000
InitialDNN/496_49_6	none	none	False	0	False	GridWorld	Pentagon	2DObs	Individual_Deep_Q	simple_mlp	0.2	0.05	0	6	0	1000
InitialDNN/497_49_7	none	none	False	0	False	GridWorld	Pentagon	2DObs	Individual_Deep_Q	simple_mlp	0.2	0.05	0	7	0	1000
InitialDNN/498_49_8	none	none	False	0	False	GridWorld	Pentagon	2DObs	Individual_Deep_Q	simple_mlp	0.2	0.05	0	8	0	1000
InitialDNN/499_49_9	none	none	False	0	False	GridWorld	Pentagon	2DObs	Individual_Deep_Q	simple_mlp	0.2	0.05	0	9	0	1000
InitialDNN/500_50_0	none	none	False	0	False	GridWorld	Pentagon	2DObs	Individual_Deep_Q	simple_mlp	0.2	0.05	0	0	-25	1000
InitialDNN/501_50_1	none	none	False	0	False	GridWorld	Pentagon	2DObs	Individual_Deep_Q	simple_mlp	0.2	0.05	0	1	-25	1000
InitialDNN/502_50_2	none	none	False	0	False	GridWorld	Pentagon	2DObs	Individual_Deep_Q	simple_mlp	0.2	0.05	0	2	-25	1000
InitialDNN/503_50_3	none	none	False	0	False	GridWorld	Pentagon	2DObs	Individual_Deep_Q	simple_mlp	0.2	0.05	0	3	-25	1000
InitialDNN/504_50_4	none	none	False	0	False	GridWorld	Pentagon	2DObs	Individual_Deep_Q	simple_mlp	0.2	0.05	0	4	-25	1000
InitialDNN/505_50_5	none	none	False	0	False	GridWorld	Pentagon	2DObs	Individual_Deep_Q	simple_mlp	0.2	0.05	0	5	-25	1000
InitialDNN/506_50_6	none	none	False	0	False	GridWorld	Pentagon	2DObs	Individual_Deep_Q	simple_mlp	0.2	0.05	0	6	-25	1000
InitialDNN/507_50_7	none	none	False	0	False	GridWorld	Pentagon	2DObs	Individual_Deep_Q	simple_mlp	0.2	0.05	0	7	-25	1000
InitialDNN/508_50_8	none	none	False	0	False	GridWorld	Pentagon	2DObs	Individual_Deep_Q	simple_mlp	0.2	0.05	0	8	-25	1000
InitialDNN/509_50_9	none	none	False	0	False	GridWorld	Pentagon	2DObs	Individual_Deep_Q	simple_mlp	0.2	0.05	0	9	-25	1000
InitialDNN/510_51_0	none	none	False	0	False	GridWorld	Pentagon	2DObs	Individual_Deep_Q	simple_mlp	0.2	0.05	0	0	-50	1000
InitialDNN/511_51_1	none	none	False	0	False	GridWorld	Pentagon	2DObs	Individual_Deep_Q	simple_mlp	0.2	0.05	0	1	-50	1000
InitialDNN/512_51_2	none	none	False	0	False	GridWorld	Pentagon	2DObs	Individual_Deep_Q	simple_mlp	0.2	0.05	0	2	-50	1000
InitialDNN/513_51_3	none	none	False	0	False	GridWorld	Pentagon	2DObs	Individual_Deep_Q	simple_mlp	0.2	0.05	0	3	-50	1000
InitialDNN/514_51_4	none	none	False	0	False	GridWorld	Pentagon	2DObs	Individual_Deep_Q	simple_mlp	0.2	0.05	0	4	-50	1000
InitialDNN/515_51_5	none	none	False	0	False	GridWorld	Pentagon	2DObs	Individual_Deep_Q	simple_mlp	0.2	0.05	0	5	-50	1000
InitialDNN/516_51_6	none	none	False	0	False	GridWorld	Pentagon	2DObs	Individual_Deep_Q	simple_mlp	0.2	0.05	0	6	-50	1000
InitialDNN/517_51_7	none	none	False	0	False	GridWorld	Pentagon	2DObs	Individual_Deep_Q	simple_mlp	0.2	0.05	0	7	-50	1000
InitialDNN/518_51_8	none	none	False	0	False	GridWorld	Pentagon	2DObs	Individual_Deep_Q	simple_mlp	0.2	0.05	0	8	-50	1000
InitialDNN/519_51_9	none	none	False	0	False	GridWorld	Pentagon	2DObs	Individual_Deep_Q	simple_mlp	0.2	0.05	0	9	-50	1000
InitialDNN/520_52_0	none	none	False	0	False	GridWorld	Pentagon	2DObs	Individual_Deep_Q	simple_mlp	0.2	0.05	0	0	-75	1000
InitialDNN/521_52_1	none	none	False	0	False	GridWorld	Pentagon	2DObs	Individual_Deep_Q	simple_mlp	0.2	0.05	0	1	-75	1000
InitialDNN/522_52_2	none	none	False	0	False	GridWorld	Pentagon	2DObs	Individual_Deep_Q	simple_mlp	0.2	0.05	0	2	-75	1000
InitialDNN/523_52_3	none	none	False	0	False	GridWorld	Pentagon	2DObs	Individual_Deep_Q	simple_mlp	0.2	0.05	0	3	-75	1000
InitialDNN/524_52_4	none	none	False	0	False	GridWorld	Pentagon	2DObs	Individual_Deep_Q	simple_mlp	0.2	0.05	0	4	-75	1000
InitialDNN/525_52_5	none	none	False	0	False	GridWorld	Pentagon	2DObs	Individual_Deep_Q	simple_mlp	0.2	0.05	0	5	-75	1000
InitialDNN/526_52_6	none	none	False	0	False	GridWorld	Pentagon	2DObs	Individual_Deep_Q	simple_mlp	0.2	0.05	0	6	-75	1000
InitialDNN/527_52_7	none	none	False	0	False	GridWorld	Pentagon	2DObs	Individual_Deep_Q	simple_mlp	0.2	0.05	0	7	-75	1000
InitialDNN/528_52_8	none	none	False	0	False	GridWorld	Pentagon	2DObs	Individual_Deep_Q	simple_mlp	0.2	0.05	0	8	-75	1000
InitialDNN/529_52_9	none	none	False	0	False	GridWorld	Pentagon	2DObs	Individual_Deep_Q	simple_mlp	0.2	0.05	0	9	-75	1000
InitialDNN/530_53_0	none	none	False	0	False	GridWorld	Pentagon	2DObs	Individual_Deep_Q	simple_mlp	0.2	0.05	0	0	-100	1000
InitialDNN/531_53_1	none	none	False	0	False	GridWorld	Pentagon	2DObs	Individual_Deep_Q	simple_mlp	0.2	0.05	0	1	-100	1000
InitialDNN/532_53_2	none	none	False	0	False	GridWorld	Pentagon	2DObs	Individual_Deep_Q	simple_mlp	0.2	0.05	0	2	-100	1000
InitialDNN/533_53_3	none	none	False	0	False	GridWorld	Pentagon	2DObs	Individual_Deep_Q	simple_mlp	0.2	0.05	0	3	-100	1000
InitialDNN/534_53_4	none	none	False	0	False	GridWorld	Pentagon	2DObs	Individual_Deep_Q	simple_mlp	0.2	0.05	0	4	-100	1000
InitialDNN/535_53_5	none	none	False	0	False	GridWorld	Pentagon	2DObs	Individual_Deep_Q	simple_mlp	0.2	0.05	0	5	-100	1000
InitialDNN/536_53_6	none	none	False	0	False	GridWorld	Pentagon	2DObs	Individual_Deep_Q	simple_mlp	0.2	0.05	0	6	-100	1000
InitialDNN/537_53_7	none	none	False	0	False	GridWorld	Pentagon	2DObs	Individual_Deep_Q	simple_mlp	0.2	0.05	0	7	-100	1000
InitialDNN/538_53_8	none	none	False	0	False	GridWorld	Pentagon	2DObs	Individual_Deep_Q	simple_mlp	0.2	0.05	0	8	-100	1000
InitialDNN/539_53_9	none	none	False	0	False	GridWorld	Pentagon	2DObs	Individual_Deep_Q	simple_mlp	0.2	0.05	0	9	-100	1000
InitialDNN/540_54_0	centralized	none	True	-10	False	GridWorld	Pentagon	2DObs	Individual_Deep_Q	simple_mlp	0.2	0.05	0.05	0	-30	1000
InitialDNN/541_54_1	centralized	none	True	-10	False	GridWorld	Pentagon	2DObs	Individual_Deep_Q	simple_mlp	0.2	0.05	0.05	1	-30	1000
InitialDNN/542_54_2	centralized	none	True	-10	False	GridWorld	Pentagon	2DObs	Individual_Deep_Q	simple_mlp	0.2	0.05	0.05	2	-30	1000
InitialDNN/543_54_3	centralized	none	True	-10	False	GridWorld	Pentagon	2DObs	Individual_Deep_Q	simple_mlp	0.2	0.05	0.05	3	-30	1000
InitialDNN/544_54_4	centralized	none	True	-10	False	GridWorld	Pentagon	2DObs	Individual_Deep_Q	simple_mlp	0.2	0.05	0.05	4	-30	1000
InitialDNN/545_54_5	centralized	none	True	-10	False	GridWorld	Pentagon	2DObs	Individual_Deep_Q	simple_mlp	0.2	0.05	0.05	5	-30	1000
InitialDNN/546_54_6	centralized	none	True	-10	False	GridWorld	Pentagon	2DObs	Individual_Deep_Q	simple_mlp	0.2	0.05	0.05	6	-30	1000
InitialDNN/547_54_7	centralized	none	True	-10	False	GridWorld	Pentagon	2DObs	Individual_Deep_Q	simple_mlp	0.2	0.05	0.05	7	-30	1000
InitialDNN/548_54_8	centralized	none	True	-10	False	GridWorld	Pentagon	2DObs	Individual_Deep_Q	simple_mlp	0.2	0.05	0.05	8	-30	1000
InitialDNN/549_54_9	centralized	none	True	-10	False	GridWorld	Pentagon	2DObs	Individual_Deep_Q	simple_mlp	0.2	0.05	0.05	9	-30	1000
InitialDNN/550_55_0	none	none	False	0	False	GridWorld	Pentagon	2DObs	Individual_Deep_Q	simple_mlp	0.2	0.05	0.05	0	0	1000
InitialDNN/551_55_1	none	none	False	0	False	GridWorld	Pentagon	2DObs	Individual_Deep_Q	simple_mlp	0.2	0.05	0.05	1	0	1000
InitialDNN/552_55_2	none	none	False	0	False	GridWorld	Pentagon	2DObs	Individual_Deep_Q	simple_mlp	0.2	0.05	0.05	2	0	1000
InitialDNN/553_55_3	none	none	False	0	False	GridWorld	Pentagon	2DObs	Individual_Deep_Q	simple_mlp	0.2	0.05	0.05	3	0	1000
InitialDNN/554_55_4	none	none	False	0	False	GridWorld	Pentagon	2DObs	Individual_Deep_Q	simple_mlp	0.2	0.05	0.05	4	0	1000
InitialDNN/555_55_5	none	none	False	0	False	GridWorld	Pentagon	2DObs	Individual_Deep_Q	simple_mlp	0.2	0.05	0.05	5	0	1000
InitialDNN/556_55_6	none	none	False	0	False	GridWorld	Pentagon	2DObs	Individual_Deep_Q	simple_mlp	0.2	0.05	0.05	6	0	1000
InitialDNN/557_55_7	none	none	False	0	False	GridWorld	Pentagon	2DObs	Individual_Deep_Q	simple_mlp	0.2	0.05	0.05	7	0	1000
InitialDNN/558_55_8	none	none	False	0	False	GridWorld	Pentagon	2DObs	Individual_Deep_Q	simple_mlp	0.2	0.05	0.05	8	0	1000
InitialDNN/559_55_9	none	none	False	0	False	GridWorld	Pentagon	2DObs	Individual_Deep_Q	simple_mlp	0.2	0.05	0.05	9	0	1000
InitialDNN/560_56_0	none	none	False	0	False	GridWorld	Pentagon	2DObs	Individual_Deep_Q	simple_mlp	0.2	0.05	0.05	0	-25	1000
InitialDNN/561_56_1	none	none	False	0	False	GridWorld	Pentagon	2DObs	Individual_Deep_Q	simple_mlp	0.2	0.05	0.05	1	-25	1000
InitialDNN/562_56_2	none	none	False	0	False	GridWorld	Pentagon	2DObs	Individual_Deep_Q	simple_mlp	0.2	0.05	0.05	2	-25	1000
InitialDNN/563_56_3	none	none	False	0	False	GridWorld	Pentagon	2DObs	Individual_Deep_Q	simple_mlp	0.2	0.05	0.05	3	-25	1000
InitialDNN/564_56_4	none	none	False	0	False	GridWorld	Pentagon	2DObs	Individual_Deep_Q	simple_mlp	0.2	0.05	0.05	4	-25	1000
InitialDNN/565_56_5	none	none	False	0	False	GridWorld	Pentagon	2DObs	Individual_Deep_Q	simple_mlp	0.2	0.05	0.05	5	-25	1000
InitialDNN/566_56_6	none	none	False	0	False	GridWorld	Pentagon	2DObs	Individual_Deep_Q	simple_mlp	0.2	0.05	0.05	6	-25	1000
InitialDNN/567_56_7	none	none	False	0	False	GridWorld	Pentagon	2DObs	Individual_Deep_Q	simple_mlp	0.2	0.05	0.05	7	-25	1000
InitialDNN/568_56_8	none	none	False	0	False	GridWorld	Pentagon	2DObs	Individual_Deep_Q	simple_mlp	0.2	0.05	0.05	8	-25	1000
InitialDNN/569_56_9	none	none	False	0	False	GridWorld	Pentagon	2DObs	Individual_Deep_Q	simple_mlp	0.2	0.05	0.05	9	-25	1000
InitialDNN/570_57_0	none	none	False	0	False	GridWorld	Pentagon	2DObs	Individual_Deep_Q	simple_mlp	0.2	0.05	0.05	0	-50	1000
InitialDNN/571_57_1	none	none	False	0	False	GridWorld	Pentagon	2DObs	Individual_Deep_Q	simple_mlp	0.2	0.05	0.05	1	-50	1000
InitialDNN/572_57_2	none	none	False	0	False	GridWorld	Pentagon	2DObs	Individual_Deep_Q	simple_mlp	0.2	0.05	0.05	2	-50	1000
InitialDNN/573_57_3	none	none	False	0	False	GridWorld	Pentagon	2DObs	Individual_Deep_Q	simple_mlp	0.2	0.05	0.05	3	-50	1000
InitialDNN/574_57_4	none	none	False	0	False	GridWorld	Pentagon	2DObs	Individual_Deep_Q	simple_mlp	0.2	0.05	0.05	4	-50	1000
InitialDNN/575_57_5	none	none	False	0	False	GridWorld	Pentagon	2DObs	Individual_Deep_Q	simple_mlp	0.2	0.05	0.05	5	-50	1000
InitialDNN/576_57_6	none	none	False	0	False	GridWorld	Pentagon	2DObs	Individual_Deep_Q	simple_mlp	0.2	0.05	0.05	6	-50	1000
InitialDNN/577_57_7	none	none	False	0	False	GridWorld	Pentagon	2DObs	Individual_Deep_Q	simple_mlp	0.2	0.05	0.05	7	-50	1000
InitialDNN/578_57_8	none	none	False	0	False	GridWorld	Pentagon	2DObs	Individual_Deep_Q	simple_mlp	0.2	0.05	0.05	8	-50	1000
InitialDNN/579_57_9	none	none	False	0	False	GridWorld	Pentagon	2DObs	Individual_Deep_Q	simple_mlp	0.2	0.05	0.05	9	-50	1000
InitialDNN/580_58_0	none	none	False	0	False	GridWorld	Pentagon	2DObs	Individual_Deep_Q	simple_mlp	0.2	0.05	0.05	0	-75	1000
InitialDNN/581_58_1	none	none	False	0	False	GridWorld	Pentagon	2DObs	Individual_Deep_Q	simple_mlp	0.2	0.05	0.05	1	-75	1000
InitialDNN/582_58_2	none	none	False	0	False	GridWorld	Pentagon	2DObs	Individual_Deep_Q	simple_mlp	0.2	0.05	0.05	2	-75	1000
InitialDNN/583_58_3	none	none	False	0	False	GridWorld	Pentagon	2DObs	Individual_Deep_Q	simple_mlp	0.2	0.05	0.05	3	-75	1000
InitialDNN/584_58_4	none	none	False	0	False	GridWorld	Pentagon	2DObs	Individual_Deep_Q	simple_mlp	0.2	0.05	0.05	4	-75	1000
InitialDNN/585_58_5	none	none	False	0	False	GridWorld	Pentagon	2DObs	Individual_Deep_Q	simple_mlp	0.2	0.05	0.05	5	-75	1000
InitialDNN/586_58_6	none	none	False	0	False	GridWorld	Pentagon	2DObs	Individual_Deep_Q	simple_mlp	0.2	0.05	0.05	6	-75	1000
InitialDNN/587_58_7	none	none	False	0	False	GridWorld	Pentagon	2DObs	Individual_Deep_Q	simple_mlp	0.2	0.05	0.05	7	-75	1000
InitialDNN/588_58_8	none	none	False	0	False	GridWorld	Pentagon	2DObs	Individual_Deep_Q	simple_mlp	0.2	0.05	0.05	8	-75	1000
InitialDNN/589_58_9	none	none	False	0	False	GridWorld	Pentagon	2DObs	Individual_Deep_Q	simple_mlp	0.2	0.05	0.05	9	-75	1000
InitialDNN/590_59_0	none	none	False	0	False	GridWorld	Pentagon	2DObs	Individual_Deep_Q	simple_mlp	0.2	0.05	0.05	0	-100	1000
InitialDNN/591_59_1	none	none	False	0	False	GridWorld	Pentagon	2DObs	Individual_Deep_Q	simple_mlp	0.2	0.05	0.05	1	-100	1000
InitialDNN/592_59_2	none	none	False	0	False	GridWorld	Pentagon	2DObs	Individual_Deep_Q	simple_mlp	0.2	0.05	0.05	2	-100	1000
InitialDNN/593_59_3	none	none	False	0	False	GridWorld	Pentagon	2DObs	Individual_Deep_Q	simple_mlp	0.2	0.05	0.05	3	-100	1000
InitialDNN/594_59_4	none	none	False	0	False	GridWorld	Pentagon	2DObs	Individual_Deep_Q	simple_mlp	0.2	0.05	0.05	4	-100	1000
InitialDNN/595_59_5	none	none	False	0	False	GridWorld	Pentagon	2DObs	Individual_Deep_Q	simple_mlp	0.2	0.05	0.05	5	-100	1000
InitialDNN/596_59_6	none	none	False	0	False	GridWorld	Pentagon	2DObs	Individual_Deep_Q	simple_mlp	0.2	0.05	0.05	6	-100	1000
InitialDNN/597_59_7	none	none	False	0	False	GridWorld	Pentagon	2DObs	Individual_Deep_Q	simple_mlp	0.2	0.05	0.05	7	-100	1000
InitialDNN/598_59_8	none	none	False	0	False	GridWorld	Pentagon	2DObs	Individual_Deep_Q	simple_mlp	0.2	0.05	0.05	8	-100	1000
InitialDNN/599_59_9	none	none	False	0	False	GridWorld	Pentagon	2DObs	Individual_Deep_Q	simple_mlp	0.2	0.05	0.05	9	-100	1000
InitialDNN/600_60_0	centralized	none	True	-10	False	GridWorld	ISR	2DObs	Individual_Deep_Q	simple_mlp	0.2	0.05	0	0	-30	1000
InitialDNN/601_60_1	centralized	none	True	-10	False	GridWorld	ISR	2DObs	Individual_Deep_Q	simple_mlp	0.2	0.05	0	1	-30	1000
InitialDNN/602_60_2	centralized	none	True	-10	False	GridWorld	ISR	2DObs	Individual_Deep_Q	simple_mlp	0.2	0.05	0	2	-30	1000
InitialDNN/603_60_3	centralized	none	True	-10	False	GridWorld	ISR	2DObs	Individual_Deep_Q	simple_mlp	0.2	0.05	0	3	-30	1000
InitialDNN/604_60_4	centralized	none	True	-10	False	GridWorld	ISR	2DObs	Individual_Deep_Q	simple_mlp	0.2	0.05	0	4	-30	1000
InitialDNN/605_60_5	centralized	none	True	-10	False	GridWorld	ISR	2DObs	Individual_Deep_Q	simple_mlp	0.2	0.05	0	5	-30	1000
InitialDNN/606_60_6	centralized	none	True	-10	False	GridWorld	ISR	2DObs	Individual_Deep_Q	simple_mlp	0.2	0.05	0	6	-30	1000
InitialDNN/607_60_7	centralized	none	True	-10	False	GridWorld	ISR	2DObs	Individual_Deep_Q	simple_mlp	0.2	0.05	0	7	-30	1000
InitialDNN/608_60_8	centralized	none	True	-10	False	GridWorld	ISR	2DObs	Individual_Deep_Q	simple_mlp	0.2	0.05	0	8	-30	1000
InitialDNN/609_60_9	centralized	none	True	-10	False	GridWorld	ISR	2DObs	Individual_Deep_Q	simple_mlp	0.2	0.05	0	9	-30	1000
InitialDNN/610_61_0	none	none	False	0	False	GridWorld	ISR	2DObs	Individual_Deep_Q	simple_mlp	0.2	0.05	0	0	0	1000
InitialDNN/611_61_1	none	none	False	0	False	GridWorld	ISR	2DObs	Individual_Deep_Q	simple_mlp	0.2	0.05	0	1	0	1000
InitialDNN/612_61_2	none	none	False	0	False	GridWorld	ISR	2DObs	Individual_Deep_Q	simple_mlp	0.2	0.05	0	2	0	1000
InitialDNN/613_61_3	none	none	False	0	False	GridWorld	ISR	2DObs	Individual_Deep_Q	simple_mlp	0.2	0.05	0	3	0	1000
InitialDNN/614_61_4	none	none	False	0	False	GridWorld	ISR	2DObs	Individual_Deep_Q	simple_mlp	0.2	0.05	0	4	0	1000
InitialDNN/615_61_5	none	none	False	0	False	GridWorld	ISR	2DObs	Individual_Deep_Q	simple_mlp	0.2	0.05	0	5	0	1000
InitialDNN/616_61_6	none	none	False	0	False	GridWorld	ISR	2DObs	Individual_Deep_Q	simple_mlp	0.2	0.05	0	6	0	1000
InitialDNN/617_61_7	none	none	False	0	False	GridWorld	ISR	2DObs	Individual_Deep_Q	simple_mlp	0.2	0.05	0	7	0	1000
InitialDNN/618_61_8	none	none	False	0	False	GridWorld	ISR	2DObs	Individual_Deep_Q	simple_mlp	0.2	0.05	0	8	0	1000
InitialDNN/619_61_9	none	none	False	0	False	GridWorld	ISR	2DObs	Individual_Deep_Q	simple_mlp	0.2	0.05	0	9	0	1000
InitialDNN/620_62_0	none	none	False	0	False	GridWorld	ISR	2DObs	Individual_Deep_Q	simple_mlp	0.2	0.05	0	0	-25	1000
InitialDNN/621_62_1	none	none	False	0	False	GridWorld	ISR	2DObs	Individual_Deep_Q	simple_mlp	0.2	0.05	0	1	-25	1000
InitialDNN/622_62_2	none	none	False	0	False	GridWorld	ISR	2DObs	Individual_Deep_Q	simple_mlp	0.2	0.05	0	2	-25	1000
InitialDNN/623_62_3	none	none	False	0	False	GridWorld	ISR	2DObs	Individual_Deep_Q	simple_mlp	0.2	0.05	0	3	-25	1000
InitialDNN/624_62_4	none	none	False	0	False	GridWorld	ISR	2DObs	Individual_Deep_Q	simple_mlp	0.2	0.05	0	4	-25	1000
InitialDNN/625_62_5	none	none	False	0	False	GridWorld	ISR	2DObs	Individual_Deep_Q	simple_mlp	0.2	0.05	0	5	-25	1000
InitialDNN/626_62_6	none	none	False	0	False	GridWorld	ISR	2DObs	Individual_Deep_Q	simple_mlp	0.2	0.05	0	6	-25	1000
InitialDNN/627_62_7	none	none	False	0	False	GridWorld	ISR	2DObs	Individual_Deep_Q	simple_mlp	0.2	0.05	0	7	-25	1000
InitialDNN/628_62_8	none	none	False	0	False	GridWorld	ISR	2DObs	Individual_Deep_Q	simple_mlp	0.2	0.05	0	8	-25	1000
InitialDNN/629_62_9	none	none	False	0	False	GridWorld	ISR	2DObs	Individual_Deep_Q	simple_mlp	0.2	0.05	0	9	-25	1000
InitialDNN/630_63_0	none	none	False	0	False	GridWorld	ISR	2DObs	Individual_Deep_Q	simple_mlp	0.2	0.05	0	0	-50	1000
InitialDNN/631_63_1	none	none	False	0	False	GridWorld	ISR	2DObs	Individual_Deep_Q	simple_mlp	0.2	0.05	0	1	-50	1000
InitialDNN/632_63_2	none	none	False	0	False	GridWorld	ISR	2DObs	Individual_Deep_Q	simple_mlp	0.2	0.05	0	2	-50	1000
InitialDNN/633_63_3	none	none	False	0	False	GridWorld	ISR	2DObs	Individual_Deep_Q	simple_mlp	0.2	0.05	0	3	-50	1000
InitialDNN/634_63_4	none	none	False	0	False	GridWorld	ISR	2DObs	Individual_Deep_Q	simple_mlp	0.2	0.05	0	4	-50	1000
InitialDNN/635_63_5	none	none	False	0	False	GridWorld	ISR	2DObs	Individual_Deep_Q	simple_mlp	0.2	0.05	0	5	-50	1000
InitialDNN/636_63_6	none	none	False	0	False	GridWorld	ISR	2DObs	Individual_Deep_Q	simple_mlp	0.2	0.05	0	6	-50	1000
InitialDNN/637_63_7	none	none	False	0	False	GridWorld	ISR	2DObs	Individual_Deep_Q	simple_mlp	0.2	0.05	0	7	-50	1000
InitialDNN/638_63_8	none	none	False	0	False	GridWorld	ISR	2DObs	Individual_Deep_Q	simple_mlp	0.2	0.05	0	8	-50	1000
InitialDNN/639_63_9	none	none	False	0	False	GridWorld	ISR	2DObs	Individual_Deep_Q	simple_mlp	0.2	0.05	0	9	-50	1000
InitialDNN/640_64_0	none	none	False	0	False	GridWorld	ISR	2DObs	Individual_Deep_Q	simple_mlp	0.2	0.05	0	0	-75	1000
InitialDNN/641_64_1	none	none	False	0	False	GridWorld	ISR	2DObs	Individual_Deep_Q	simple_mlp	0.2	0.05	0	1	-75	1000
InitialDNN/642_64_2	none	none	False	0	False	GridWorld	ISR	2DObs	Individual_Deep_Q	simple_mlp	0.2	0.05	0	2	-75	1000
InitialDNN/643_64_3	none	none	False	0	False	GridWorld	ISR	2DObs	Individual_Deep_Q	simple_mlp	0.2	0.05	0	3	-75	1000
InitialDNN/644_64_4	none	none	False	0	False	GridWorld	ISR	2DObs	Individual_Deep_Q	simple_mlp	0.2	0.05	0	4	-75	1000
InitialDNN/645_64_5	none	none	False	0	False	GridWorld	ISR	2DObs	Individual_Deep_Q	simple_mlp	0.2	0.05	0	5	-75	1000
InitialDNN/646_64_6	none	none	False	0	False	GridWorld	ISR	2DObs	Individual_Deep_Q	simple_mlp	0.2	0.05	0	6	-75	1000
InitialDNN/647_64_7	none	none	False	0	False	GridWorld	ISR	2DObs	Individual_Deep_Q	simple_mlp	0.2	0.05	0	7	-75	1000
InitialDNN/648_64_8	none	none	False	0	False	GridWorld	ISR	2DObs	Individual_Deep_Q	simple_mlp	0.2	0.05	0	8	-75	1000
InitialDNN/649_64_9	none	none	False	0	False	GridWorld	ISR	2DObs	Individual_Deep_Q	simple_mlp	0.2	0.05	0	9	-75	1000
InitialDNN/650_65_0	none	none	False	0	False	GridWorld	ISR	2DObs	Individual_Deep_Q	simple_mlp	0.2	0.05	0	0	-100	1000
InitialDNN/651_65_1	none	none	False	0	False	GridWorld	ISR	2DObs	Individual_Deep_Q	simple_mlp	0.2	0.05	0	1	-100	1000
InitialDNN/652_65_2	none	none	False	0	False	GridWorld	ISR	2DObs	Individual_Deep_Q	simple_mlp	0.2	0.05	0	2	-100	1000
InitialDNN/653_65_3	none	none	False	0	False	GridWorld	ISR	2DObs	Individual_Deep_Q	simple_mlp	0.2	0.05	0	3	-100	1000
InitialDNN/654_65_4	none	none	False	0	False	GridWorld	ISR	2DObs	Individual_Deep_Q	simple_mlp	0.2	0.05	0	4	-100	1000
InitialDNN/655_65_5	none	none	False	0	False	GridWorld	ISR	2DObs	Individual_Deep_Q	simple_mlp	0.2	0.05	0	5	-100	1000
InitialDNN/656_65_6	none	none	False	0	False	GridWorld	ISR	2DObs	Individual_Deep_Q	simple_mlp	0.2	0.05	0	6	-100	1000
InitialDNN/657_65_7	none	none	False	0	False	GridWorld	ISR	2DObs	Individual_Deep_Q	simple_mlp	0.2	0.05	0	7	-100	1000
InitialDNN/658_65_8	none	none	False	0	False	GridWorld	ISR	2DObs	Individual_Deep_Q	simple_mlp	0.2	0.05	0	8	-100	1000
InitialDNN/659_65_9	none	none	False	0	False	GridWorld	ISR	2DObs	Individual_Deep_Q	simple_mlp	0.2	0.05	0	9	-100	1000
InitialDNN/660_66_0	centralized	none	True	-10	False	GridWorld	ISR	2DObs	Individual_Deep_Q	simple_mlp	0.2	0.05	0.05	0	-30	1000
InitialDNN/661_66_1	centralized	none	True	-10	False	GridWorld	ISR	2DObs	Individual_Deep_Q	simple_mlp	0.2	0.05	0.05	1	-30	1000
InitialDNN/662_66_2	centralized	none	True	-10	False	GridWorld	ISR	2DObs	Individual_Deep_Q	simple_mlp	0.2	0.05	0.05	2	-30	1000
InitialDNN/663_66_3	centralized	none	True	-10	False	GridWorld	ISR	2DObs	Individual_Deep_Q	simple_mlp	0.2	0.05	0.05	3	-30	1000
InitialDNN/664_66_4	centralized	none	True	-10	False	GridWorld	ISR	2DObs	Individual_Deep_Q	simple_mlp	0.2	0.05	0.05	4	-30	1000
InitialDNN/665_66_5	centralized	none	True	-10	False	GridWorld	ISR	2DObs	Individual_Deep_Q	simple_mlp	0.2	0.05	0.05	5	-30	1000
InitialDNN/666_66_6	centralized	none	True	-10	False	GridWorld	ISR	2DObs	Individual_Deep_Q	simple_mlp	0.2	0.05	0.05	6	-30	1000
InitialDNN/667_66_7	centralized	none	True	-10	False	GridWorld	ISR	2DObs	Individual_Deep_Q	simple_mlp	0.2	0.05	0.05	7	-30	1000
InitialDNN/668_66_8	centralized	none	True	-10	False	GridWorld	ISR	2DObs	Individual_Deep_Q	simple_mlp	0.2	0.05	0.05	8	-30	1000
InitialDNN/669_66_9	centralized	none	True	-10	False	GridWorld	ISR	2DObs	Individual_Deep_Q	simple_mlp	0.2	0.05	0.05	9	-30	1000
InitialDNN/670_67_0	none	none	False	0	False	GridWorld	ISR	2DObs	Individual_Deep_Q	simple_mlp	0.2	0.05	0.05	0	0	1000
InitialDNN/671_67_1	none	none	False	0	False	GridWorld	ISR	2DObs	Individual_Deep_Q	simple_mlp	0.2	0.05	0.05	1	0	1000
InitialDNN/672_67_2	none	none	False	0	False	GridWorld	ISR	2DObs	Individual_Deep_Q	simple_mlp	0.2	0.05	0.05	2	0	1000
InitialDNN/673_67_3	none	none	False	0	False	GridWorld	ISR	2DObs	Individual_Deep_Q	simple_mlp	0.2	0.05	0.05	3	0	1000
InitialDNN/674_67_4	none	none	False	0	False	GridWorld	ISR	2DObs	Individual_Deep_Q	simple_mlp	0.2	0.05	0.05	4	0	1000
InitialDNN/675_67_5	none	none	False	0	False	GridWorld	ISR	2DObs	Individual_Deep_Q	simple_mlp	0.2	0.05	0.05	5	0	1000
InitialDNN/676_67_6	none	none	False	0	False	GridWorld	ISR	2DObs	Individual_Deep_Q	simple_mlp	0.2	0.05	0.05	6	0	1000
InitialDNN/677_67_7	none	none	False	0	False	GridWorld	ISR	2DObs	Individual_Deep_Q	simple_mlp	0.2	0.05	0.05	7	0	1000
InitialDNN/678_67_8	none	none	False	0	False	GridWorld	ISR	2DObs	Individual_Deep_Q	simple_mlp	0.2	0.05	0.05	8	0	1000
InitialDNN/679_67_9	none	none	False	0	False	GridWorld	ISR	2DObs	Individual_Deep_Q	simple_mlp	0.2	0.05	0.05	9	0	1000
InitialDNN/680_68_0	none	none	False	0	False	GridWorld	ISR	2DObs	Individual_Deep_Q	simple_mlp	0.2	0.05	0.05	0	-25	1000
InitialDNN/681_68_1	none	none	False	0	False	GridWorld	ISR	2DObs	Individual_Deep_Q	simple_mlp	0.2	0.05	0.05	1	-25	1000
InitialDNN/682_68_2	none	none	False	0	False	GridWorld	ISR	2DObs	Individual_Deep_Q	simple_mlp	0.2	0.05	0.05	2	-25	1000
InitialDNN/683_68_3	none	none	False	0	False	GridWorld	ISR	2DObs	Individual_Deep_Q	simple_mlp	0.2	0.05	0.05	3	-25	1000
InitialDNN/684_68_4	none	none	False	0	False	GridWorld	ISR	2DObs	Individual_Deep_Q	simple_mlp	0.2	0.05	0.05	4	-25	1000
InitialDNN/685_68_5	none	none	False	0	False	GridWorld	ISR	2DObs	Individual_Deep_Q	simple_mlp	0.2	0.05	0.05	5	-25	1000
InitialDNN/686_68_6	none	none	False	0	False	GridWorld	ISR	2DObs	Individual_Deep_Q	simple_mlp	0.2	0.05	0.05	6	-25	1000
InitialDNN/687_68_7	none	none	False	0	False	GridWorld	ISR	2DObs	Individual_Deep_Q	simple_mlp	0.2	0.05	0.05	7	-25	1000
InitialDNN/688_68_8	none	none	False	0	False	GridWorld	ISR	2DObs	Individual_Deep_Q	simple_mlp	0.2	0.05	0.05	8	-25	1000
InitialDNN/689_68_9	none	none	False	0	False	GridWorld	ISR	2DObs	Individual_Deep_Q	simple_mlp	0.2	0.05	0.05	9	-25	1000
InitialDNN/690_69_0	none	none	False	0	False	GridWorld	ISR	2DObs	Individual_Deep_Q	simple_mlp	0.2	0.05	0.05	0	-50	1000
InitialDNN/691_69_1	none	none	False	0	False	GridWorld	ISR	2DObs	Individual_Deep_Q	simple_mlp	0.2	0.05	0.05	1	-50	1000
InitialDNN/692_69_2	none	none	False	0	False	GridWorld	ISR	2DObs	Individual_Deep_Q	simple_mlp	0.2	0.05	0.05	2	-50	1000
InitialDNN/693_69_3	none	none	False	0	False	GridWorld	ISR	2DObs	Individual_Deep_Q	simple_mlp	0.2	0.05	0.05	3	-50	1000
InitialDNN/694_69_4	none	none	False	0	False	GridWorld	ISR	2DObs	Individual_Deep_Q	simple_mlp	0.2	0.05	0.05	4	-50	1000
InitialDNN/695_69_5	none	none	False	0	False	GridWorld	ISR	2DObs	Individual_Deep_Q	simple_mlp	0.2	0.05	0.05	5	-50	1000
InitialDNN/696_69_6	none	none	False	0	False	GridWorld	ISR	2DObs	Individual_Deep_Q	simple_mlp	0.2	0.05	0.05	6	-50	1000
InitialDNN/697_69_7	none	none	False	0	False	GridWorld	ISR	2DObs	Individual_Deep_Q	simple_mlp	0.2	0.05	0.05	7	-50	1000
InitialDNN/698_69_8	none	none	False	0	False	GridWorld	ISR	2DObs	Individual_Deep_Q	simple_mlp	0.2	0.05	0.05	8	-50	1000
InitialDNN/699_69_9	none	none	False	0	False	GridWorld	ISR	2DObs	Individual_Deep_Q	simple_mlp	0.2	0.05	0.05	9	-50	1000
InitialDNN/700_70_0	none	none	False	0	False	GridWorld	ISR	2DObs	Individual_Deep_Q	simple_mlp	0.2	0.05	0.05	0	-75	1000
InitialDNN/701_70_1	none	none	False	0	False	GridWorld	ISR	2DObs	Individual_Deep_Q	simple_mlp	0.2	0.05	0.05	1	-75	1000
InitialDNN/702_70_2	none	none	False	0	False	GridWorld	ISR	2DObs	Individual_Deep_Q	simple_mlp	0.2	0.05	0.05	2	-75	1000
InitialDNN/703_70_3	none	none	False	0	False	GridWorld	ISR	2DObs	Individual_Deep_Q	simple_mlp	0.2	0.05	0.05	3	-75	1000
InitialDNN/704_70_4	none	none	False	0	False	GridWorld	ISR	2DObs	Individual_Deep_Q	simple_mlp	0.2	0.05	0.05	4	-75	1000
InitialDNN/705_70_5	none	none	False	0	False	GridWorld	ISR	2DObs	Individual_Deep_Q	simple_mlp	0.2	0.05	0.05	5	-75	1000
InitialDNN/706_70_6	none	none	False	0	False	GridWorld	ISR	2DObs	Individual_Deep_Q	simple_mlp	0.2	0.05	0.05	6	-75	1000
InitialDNN/707_70_7	none	none	False	0	False	GridWorld	ISR	2DObs	Individual_Deep_Q	simple_mlp	0.2	0.05	0.05	7	-75	1000
InitialDNN/708_70_8	none	none	False	0	False	GridWorld	ISR	2DObs	Individual_Deep_Q	simple_mlp	0.2	0.05	0.05	8	-75	1000
InitialDNN/709_70_9	none	none	False	0	False	GridWorld	ISR	2DObs	Individual_Deep_Q	simple_mlp	0.2	0.05	0.05	9	-75	1000
InitialDNN/710_71_0	none	none	False	0	False	GridWorld	ISR	2DObs	Individual_Deep_Q	simple_mlp	0.2	0.05	0.05	0	-100	1000
InitialDNN/711_71_1	none	none	False	0	False	GridWorld	ISR	2DObs	Individual_Deep_Q	simple_mlp	0.2	0.05	0.05	1	-100	1000
InitialDNN/712_71_2	none	none	False	0	False	GridWorld	ISR	2DObs	Individual_Deep_Q	simple_mlp	0.2	0.05	0.05	2	-100	1000
InitialDNN/713_71_3	none	none	False	0	False	GridWorld	ISR	2DObs	Individual_Deep_Q	simple_mlp	0.2	0.05	0.05	3	-100	1000
InitialDNN/714_71_4	none	none	False	0	False	GridWorld	ISR	2DObs	Individual_Deep_Q	simple_mlp	0.2	0.05	0.05	4	-100	1000
InitialDNN/715_71_5	none	none	False	0	False	GridWorld	ISR	2DObs	Individual_Deep_Q	simple_mlp	0.2	0.05	0.05	5	-100	1000
InitialDNN/716_71_6	none	none	False	0	False	GridWorld	ISR	2DObs	Individual_Deep_Q	simple_mlp	0.2	0.05	0.05	6	-100	1000
InitialDNN/717_71_7	none	none	False	0	False	GridWorld	ISR	2DObs	Individual_Deep_Q	simple_mlp	0.2	0.05	0.05	7	-100	1000
InitialDNN/718_71_8	none	none	False	0	False	GridWorld	ISR	2DObs	Individual_Deep_Q	simple_mlp	0.2	0.05	0.05	8	-100	1000
InitialDNN/719_71_9	none	none	False	0	False	GridWorld	ISR	2DObs	Individual_Deep_Q	simple_mlp	0.2	0.05	0.05	9	-100	1000
InitialDNN/720_72_0	centralized	none	True	-10	False	GridWorld	SUNY	2DObs	Individual_Deep_Q	simple_mlp	0.2	0.05	0	0	-30	1000
InitialDNN/721_72_1	centralized	none	True	-10	False	GridWorld	SUNY	2DObs	Individual_Deep_Q	simple_mlp	0.2	0.05	0	1	-30	1000
InitialDNN/722_72_2	centralized	none	True	-10	False	GridWorld	SUNY	2DObs	Individual_Deep_Q	simple_mlp	0.2	0.05	0	2	-30	1000
InitialDNN/723_72_3	centralized	none	True	-10	False	GridWorld	SUNY	2DObs	Individual_Deep_Q	simple_mlp	0.2	0.05	0	3	-30	1000
InitialDNN/724_72_4	centralized	none	True	-10	False	GridWorld	SUNY	2DObs	Individual_Deep_Q	simple_mlp	0.2	0.05	0	4	-30	1000
InitialDNN/725_72_5	centralized	none	True	-10	False	GridWorld	SUNY	2DObs	Individual_Deep_Q	simple_mlp	0.2	0.05	0	5	-30	1000
InitialDNN/726_72_6	centralized	none	True	-10	False	GridWorld	SUNY	2DObs	Individual_Deep_Q	simple_mlp	0.2	0.05	0	6	-30	1000
InitialDNN/727_72_7	centralized	none	True	-10	False	GridWorld	SUNY	2DObs	Individual_Deep_Q	simple_mlp	0.2	0.05	0	7	-30	1000
InitialDNN/728_72_8	centralized	none	True	-10	False	GridWorld	SUNY	2DObs	Individual_Deep_Q	simple_mlp	0.2	0.05	0	8	-30	1000
InitialDNN/729_72_9	centralized	none	True	-10	False	GridWorld	SUNY	2DObs	Individual_Deep_Q	simple_mlp	0.2	0.05	0	9	-30	1000
InitialDNN/730_73_0	none	none	False	0	False	GridWorld	SUNY	2DObs	Individual_Deep_Q	simple_mlp	0.2	0.05	0	0	0	1000
InitialDNN/731_73_1	none	none	False	0	False	GridWorld	SUNY	2DObs	Individual_Deep_Q	simple_mlp	0.2	0.05	0	1	0	1000
InitialDNN/732_73_2	none	none	False	0	False	GridWorld	SUNY	2DObs	Individual_Deep_Q	simple_mlp	0.2	0.05	0	2	0	1000
InitialDNN/733_73_3	none	none	False	0	False	GridWorld	SUNY	2DObs	Individual_Deep_Q	simple_mlp	0.2	0.05	0	3	0	1000
InitialDNN/734_73_4	none	none	False	0	False	GridWorld	SUNY	2DObs	Individual_Deep_Q	simple_mlp	0.2	0.05	0	4	0	1000
InitialDNN/735_73_5	none	none	False	0	False	GridWorld	SUNY	2DObs	Individual_Deep_Q	simple_mlp	0.2	0.05	0	5	0	1000
InitialDNN/736_73_6	none	none	False	0	False	GridWorld	SUNY	2DObs	Individual_Deep_Q	simple_mlp	0.2	0.05	0	6	0	1000
InitialDNN/737_73_7	none	none	False	0	False	GridWorld	SUNY	2DObs	Individual_Deep_Q	simple_mlp	0.2	0.05	0	7	0	1000
InitialDNN/738_73_8	none	none	False	0	False	GridWorld	SUNY	2DObs	Individual_Deep_Q	simple_mlp	0.2	0.05	0	8	0	1000
InitialDNN/739_73_9	none	none	False	0	False	GridWorld	SUNY	2DObs	Individual_Deep_Q	simple_mlp	0.2	0.05	0	9	0	1000
InitialDNN/740_74_0	none	none	False	0	False	GridWorld	SUNY	2DObs	Individual_Deep_Q	simple_mlp	0.2	0.05	0	0	-25	1000
InitialDNN/741_74_1	none	none	False	0	False	GridWorld	SUNY	2DObs	Individual_Deep_Q	simple_mlp	0.2	0.05	0	1	-25	1000
InitialDNN/742_74_2	none	none	False	0	False	GridWorld	SUNY	2DObs	Individual_Deep_Q	simple_mlp	0.2	0.05	0	2	-25	1000
InitialDNN/743_74_3	none	none	False	0	False	GridWorld	SUNY	2DObs	Individual_Deep_Q	simple_mlp	0.2	0.05	0	3	-25	1000
InitialDNN/744_74_4	none	none	False	0	False	GridWorld	SUNY	2DObs	Individual_Deep_Q	simple_mlp	0.2	0.05	0	4	-25	1000
InitialDNN/745_74_5	none	none	False	0	False	GridWorld	SUNY	2DObs	Individual_Deep_Q	simple_mlp	0.2	0.05	0	5	-25	1000
InitialDNN/746_74_6	none	none	False	0	False	GridWorld	SUNY	2DObs	Individual_Deep_Q	simple_mlp	0.2	0.05	0	6	-25	1000
InitialDNN/747_74_7	none	none	False	0	False	GridWorld	SUNY	2DObs	Individual_Deep_Q	simple_mlp	0.2	0.05	0	7	-25	1000
InitialDNN/748_74_8	none	none	False	0	False	GridWorld	SUNY	2DObs	Individual_Deep_Q	simple_mlp	0.2	0.05	0	8	-25	1000
InitialDNN/749_74_9	none	none	False	0	False	GridWorld	SUNY	2DObs	Individual_Deep_Q	simple_mlp	0.2	0.05	0	9	-25	1000
InitialDNN/750_75_0	none	none	False	0	False	GridWorld	SUNY	2DObs	Individual_Deep_Q	simple_mlp	0.2	0.05	0	0	-50	1000
InitialDNN/751_75_1	none	none	False	0	False	GridWorld	SUNY	2DObs	Individual_Deep_Q	simple_mlp	0.2	0.05	0	1	-50	1000
InitialDNN/752_75_2	none	none	False	0	False	GridWorld	SUNY	2DObs	Individual_Deep_Q	simple_mlp	0.2	0.05	0	2	-50	1000
InitialDNN/753_75_3	none	none	False	0	False	GridWorld	SUNY	2DObs	Individual_Deep_Q	simple_mlp	0.2	0.05	0	3	-50	1000
InitialDNN/754_75_4	none	none	False	0	False	GridWorld	SUNY	2DObs	Individual_Deep_Q	simple_mlp	0.2	0.05	0	4	-50	1000
InitialDNN/755_75_5	none	none	False	0	False	GridWorld	SUNY	2DObs	Individual_Deep_Q	simple_mlp	0.2	0.05	0	5	-50	1000
InitialDNN/756_75_6	none	none	False	0	False	GridWorld	SUNY	2DObs	Individual_Deep_Q	simple_mlp	0.2	0.05	0	6	-50	1000
InitialDNN/757_75_7	none	none	False	0	False	GridWorld	SUNY	2DObs	Individual_Deep_Q	simple_mlp	0.2	0.05	0	7	-50	1000
InitialDNN/758_75_8	none	none	False	0	False	GridWorld	SUNY	2DObs	Individual_Deep_Q	simple_mlp	0.2	0.05	0	8	-50	1000
InitialDNN/759_75_9	none	none	False	0	False	GridWorld	SUNY	2DObs	Individual_Deep_Q	simple_mlp	0.2	0.05	0	9	-50	1000
InitialDNN/760_76_0	none	none	False	0	False	GridWorld	SUNY	2DObs	Individual_Deep_Q	simple_mlp	0.2	0.05	0	0	-75	1000
InitialDNN/761_76_1	none	none	False	0	False	GridWorld	SUNY	2DObs	Individual_Deep_Q	simple_mlp	0.2	0.05	0	1	-75	1000
InitialDNN/762_76_2	none	none	False	0	False	GridWorld	SUNY	2DObs	Individual_Deep_Q	simple_mlp	0.2	0.05	0	2	-75	1000
InitialDNN/763_76_3	none	none	False	0	False	GridWorld	SUNY	2DObs	Individual_Deep_Q	simple_mlp	0.2	0.05	0	3	-75	1000
InitialDNN/764_76_4	none	none	False	0	False	GridWorld	SUNY	2DObs	Individual_Deep_Q	simple_mlp	0.2	0.05	0	4	-75	1000
InitialDNN/765_76_5	none	none	False	0	False	GridWorld	SUNY	2DObs	Individual_Deep_Q	simple_mlp	0.2	0.05	0	5	-75	1000
InitialDNN/766_76_6	none	none	False	0	False	GridWorld	SUNY	2DObs	Individual_Deep_Q	simple_mlp	0.2	0.05	0	6	-75	1000
InitialDNN/767_76_7	none	none	False	0	False	GridWorld	SUNY	2DObs	Individual_Deep_Q	simple_mlp	0.2	0.05	0	7	-75	1000
InitialDNN/768_76_8	none	none	False	0	False	GridWorld	SUNY	2DObs	Individual_Deep_Q	simple_mlp	0.2	0.05	0	8	-75	1000
InitialDNN/769_76_9	none	none	False	0	False	GridWorld	SUNY	2DObs	Individual_Deep_Q	simple_mlp	0.2	0.05	0	9	-75	1000
InitialDNN/770_77_0	none	none	False	0	False	GridWorld	SUNY	2DObs	Individual_Deep_Q	simple_mlp	0.2	0.05	0	0	-100	1000
InitialDNN/771_77_1	none	none	False	0	False	GridWorld	SUNY	2DObs	Individual_Deep_Q	simple_mlp	0.2	0.05	0	1	-100	1000
InitialDNN/772_77_2	none	none	False	0	False	GridWorld	SUNY	2DObs	Individual_Deep_Q	simple_mlp	0.2	0.05	0	2	-100	1000
InitialDNN/773_77_3	none	none	False	0	False	GridWorld	SUNY	2DObs	Individual_Deep_Q	simple_mlp	0.2	0.05	0	3	-100	1000
InitialDNN/774_77_4	none	none	False	0	False	GridWorld	SUNY	2DObs	Individual_Deep_Q	simple_mlp	0.2	0.05	0	4	-100	1000
InitialDNN/775_77_5	none	none	False	0	False	GridWorld	SUNY	2DObs	Individual_Deep_Q	simple_mlp	0.2	0.05	0	5	-100	1000
InitialDNN/776_77_6	none	none	False	0	False	GridWorld	SUNY	2DObs	Individual_Deep_Q	simple_mlp	0.2	0.05	0	6	-100	1000
InitialDNN/777_77_7	none	none	False	0	False	GridWorld	SUNY	2DObs	Individual_Deep_Q	simple_mlp	0.2	0.05	0	7	-100	1000
InitialDNN/778_77_8	none	none	False	0	False	GridWorld	SUNY	2DObs	Individual_Deep_Q	simple_mlp	0.2	0.05	0	8	-100	1000
InitialDNN/779_77_9	none	none	False	0	False	GridWorld	SUNY	2DObs	Individual_Deep_Q	simple_mlp	0.2	0.05	0	9	-100	1000
InitialDNN/780_78_0	centralized	none	True	-10	False	GridWorld	SUNY	2DObs	Individual_Deep_Q	simple_mlp	0.2	0.05	0.05	0	-30	1000
InitialDNN/781_78_1	centralized	none	True	-10	False	GridWorld	SUNY	2DObs	Individual_Deep_Q	simple_mlp	0.2	0.05	0.05	1	-30	1000
InitialDNN/782_78_2	centralized	none	True	-10	False	GridWorld	SUNY	2DObs	Individual_Deep_Q	simple_mlp	0.2	0.05	0.05	2	-30	1000
InitialDNN/783_78_3	centralized	none	True	-10	False	GridWorld	SUNY	2DObs	Individual_Deep_Q	simple_mlp	0.2	0.05	0.05	3	-30	1000
InitialDNN/784_78_4	centralized	none	True	-10	False	GridWorld	SUNY	2DObs	Individual_Deep_Q	simple_mlp	0.2	0.05	0.05	4	-30	1000
InitialDNN/785_78_5	centralized	none	True	-10	False	GridWorld	SUNY	2DObs	Individual_Deep_Q	simple_mlp	0.2	0.05	0.05	5	-30	1000
InitialDNN/786_78_6	centralized	none	True	-10	False	GridWorld	SUNY	2DObs	Individual_Deep_Q	simple_mlp	0.2	0.05	0.05	6	-30	1000
InitialDNN/787_78_7	centralized	none	True	-10	False	GridWorld	SUNY	2DObs	Individual_Deep_Q	simple_mlp	0.2	0.05	0.05	7	-30	1000
InitialDNN/788_78_8	centralized	none	True	-10	False	GridWorld	SUNY	2DObs	Individual_Deep_Q	simple_mlp	0.2	0.05	0.05	8	-30	1000
InitialDNN/789_78_9	centralized	none	True	-10	False	GridWorld	SUNY	2DObs	Individual_Deep_Q	simple_mlp	0.2	0.05	0.05	9	-30	1000
InitialDNN/790_79_0	none	none	False	0	False	GridWorld	SUNY	2DObs	Individual_Deep_Q	simple_mlp	0.2	0.05	0.05	0	0	1000
InitialDNN/791_79_1	none	none	False	0	False	GridWorld	SUNY	2DObs	Individual_Deep_Q	simple_mlp	0.2	0.05	0.05	1	0	1000
InitialDNN/792_79_2	none	none	False	0	False	GridWorld	SUNY	2DObs	Individual_Deep_Q	simple_mlp	0.2	0.05	0.05	2	0	1000
InitialDNN/793_79_3	none	none	False	0	False	GridWorld	SUNY	2DObs	Individual_Deep_Q	simple_mlp	0.2	0.05	0.05	3	0	1000
InitialDNN/794_79_4	none	none	False	0	False	GridWorld	SUNY	2DObs	Individual_Deep_Q	simple_mlp	0.2	0.05	0.05	4	0	1000
InitialDNN/795_79_5	none	none	False	0	False	GridWorld	SUNY	2DObs	Individual_Deep_Q	simple_mlp	0.2	0.05	0.05	5	0	1000
InitialDNN/796_79_6	none	none	False	0	False	GridWorld	SUNY	2DObs	Individual_Deep_Q	simple_mlp	0.2	0.05	0.05	6	0	1000
InitialDNN/797_79_7	none	none	False	0	False	GridWorld	SUNY	2DObs	Individual_Deep_Q	simple_mlp	0.2	0.05	0.05	7	0	1000
InitialDNN/798_79_8	none	none	False	0	False	GridWorld	SUNY	2DObs	Individual_Deep_Q	simple_mlp	0.2	0.05	0.05	8	0	1000
InitialDNN/799_79_9	none	none	False	0	False	GridWorld	SUNY	2DObs	Individual_Deep_Q	simple_mlp	0.2	0.05	0.05	9	0	1000
InitialDNN/800_80_0	none	none	False	0	False	GridWorld	SUNY	2DObs	Individual_Deep_Q	simple_mlp	0.2	0.05	0.05	0	-25	1000
InitialDNN/801_80_1	none	none	False	0	False	GridWorld	SUNY	2DObs	Individual_Deep_Q	simple_mlp	0.2	0.05	0.05	1	-25	1000
InitialDNN/802_80_2	none	none	False	0	False	GridWorld	SUNY	2DObs	Individual_Deep_Q	simple_mlp	0.2	0.05	0.05	2	-25	1000
InitialDNN/803_80_3	none	none	False	0	False	GridWorld	SUNY	2DObs	Individual_Deep_Q	simple_mlp	0.2	0.05	0.05	3	-25	1000
InitialDNN/804_80_4	none	none	False	0	False	GridWorld	SUNY	2DObs	Individual_Deep_Q	simple_mlp	0.2	0.05	0.05	4	-25	1000
InitialDNN/805_80_5	none	none	False	0	False	GridWorld	SUNY	2DObs	Individual_Deep_Q	simple_mlp	0.2	0.05	0.05	5	-25	1000
InitialDNN/806_80_6	none	none	False	0	False	GridWorld	SUNY	2DObs	Individual_Deep_Q	simple_mlp	0.2	0.05	0.05	6	-25	1000
InitialDNN/807_80_7	none	none	False	0	False	GridWorld	SUNY	2DObs	Individual_Deep_Q	simple_mlp	0.2	0.05	0.05	7	-25	1000
InitialDNN/808_80_8	none	none	False	0	False	GridWorld	SUNY	2DObs	Individual_Deep_Q	simple_mlp	0.2	0.05	0.05	8	-25	1000
InitialDNN/809_80_9	none	none	False	0	False	GridWorld	SUNY	2DObs	Individual_Deep_Q	simple_mlp	0.2	0.05	0.05	9	-25	1000
InitialDNN/810_81_0	none	none	False	0	False	GridWorld	SUNY	2DObs	Individual_Deep_Q	simple_mlp	0.2	0.05	0.05	0	-50	1000
InitialDNN/811_81_1	none	none	False	0	False	GridWorld	SUNY	2DObs	Individual_Deep_Q	simple_mlp	0.2	0.05	0.05	1	-50	1000
InitialDNN/812_81_2	none	none	False	0	False	GridWorld	SUNY	2DObs	Individual_Deep_Q	simple_mlp	0.2	0.05	0.05	2	-50	1000
InitialDNN/813_81_3	none	none	False	0	False	GridWorld	SUNY	2DObs	Individual_Deep_Q	simple_mlp	0.2	0.05	0.05	3	-50	1000
InitialDNN/814_81_4	none	none	False	0	False	GridWorld	SUNY	2DObs	Individual_Deep_Q	simple_mlp	0.2	0.05	0.05	4	-50	1000
InitialDNN/815_81_5	none	none	False	0	False	GridWorld	SUNY	2DObs	Individual_Deep_Q	simple_mlp	0.2	0.05	0.05	5	-50	1000
InitialDNN/816_81_6	none	none	False	0	False	GridWorld	SUNY	2DObs	Individual_Deep_Q	simple_mlp	0.2	0.05	0.05	6	-50	1000
InitialDNN/817_81_7	none	none	False	0	False	GridWorld	SUNY	2DObs	Individual_Deep_Q	simple_mlp	0.2	0.05	0.05	7	-50	1000
InitialDNN/818_81_8	none	none	False	0	False	GridWorld	SUNY	2DObs	Individual_Deep_Q	simple_mlp	0.2	0.05	0.05	8	-50	1000
InitialDNN/819_81_9	none	none	False	0	False	GridWorld	SUNY	2DObs	Individual_Deep_Q	simple_mlp	0.2	0.05	0.05	9	-50	1000
InitialDNN/820_82_0	none	none	False	0	False	GridWorld	SUNY	2DObs	Individual_Deep_Q	simple_mlp	0.2	0.05	0.05	0	-75	1000
InitialDNN/821_82_1	none	none	False	0	False	GridWorld	SUNY	2DObs	Individual_Deep_Q	simple_mlp	0.2	0.05	0.05	1	-75	1000
InitialDNN/822_82_2	none	none	False	0	False	GridWorld	SUNY	2DObs	Individual_Deep_Q	simple_mlp	0.2	0.05	0.05	2	-75	1000
InitialDNN/823_82_3	none	none	False	0	False	GridWorld	SUNY	2DObs	Individual_Deep_Q	simple_mlp	0.2	0.05	0.05	3	-75	1000
InitialDNN/824_82_4	none	none	False	0	False	GridWorld	SUNY	2DObs	Individual_Deep_Q	simple_mlp	0.2	0.05	0.05	4	-75	1000
InitialDNN/825_82_5	none	none	False	0	False	GridWorld	SUNY	2DObs	Individual_Deep_Q	simple_mlp	0.2	0.05	0.05	5	-75	1000
InitialDNN/826_82_6	none	none	False	0	False	GridWorld	SUNY	2DObs	Individual_Deep_Q	simple_mlp	0.2	0.05	0.05	6	-75	1000
InitialDNN/827_82_7	none	none	False	0	False	GridWorld	SUNY	2DObs	Individual_Deep_Q	simple_mlp	0.2	0.05	0.05	7	-75	1000
InitialDNN/828_82_8	none	none	False	0	False	GridWorld	SUNY	2DObs	Individual_Deep_Q	simple_mlp	0.2	0.05	0.05	8	-75	1000
InitialDNN/829_82_9	none	none	False	0	False	GridWorld	SUNY	2DObs	Individual_Deep_Q	simple_mlp	0.2	0.05	0.05	9	-75	1000
InitialDNN/830_83_0	none	none	False	0	False	GridWorld	SUNY	2DObs	Individual_Deep_Q	simple_mlp	0.2	0.05	0.05	0	-100	1000
InitialDNN/831_83_1	none	none	False	0	False	GridWorld	SUNY	2DObs	Individual_Deep_Q	simple_mlp	0.2	0.05	0.05	1	-100	1000
InitialDNN/832_83_2	none	none	False	0	False	GridWorld	SUNY	2DObs	Individual_Deep_Q	simple_mlp	0.2	0.05	0.05	2	-100	1000
InitialDNN/833_83_3	none	none	False	0	False	GridWorld	SUNY	2DObs	Individual_Deep_Q	simple_mlp	0.2	0.05	0.05	3	-100	1000
InitialDNN/834_83_4	none	none	False	0	False	GridWorld	SUNY	2DObs	Individual_Deep_Q	simple_mlp	0.2	0.05	0.05	4	-100	1000
InitialDNN/835_83_5	none	none	False	0	False	GridWorld	SUNY	2DObs	Individual_Deep_Q	simple_mlp	0.2	0.05	0.05	5	-100	1000
InitialDNN/836_83_6	none	none	False	0	False	GridWorld	SUNY	2DObs	Individual_Deep_Q	simple_mlp	0.2	0.05	0.05	6	-100	1000
InitialDNN/837_83_7	none	none	False	0	False	GridWorld	SUNY	2DObs	Individual_Deep_Q	simple_mlp	0.2	0.05	0.05	7	-100	1000
InitialDNN/838_83_8	none	none	False	0	False	GridWorld	SUNY	2DObs	Individual_Deep_Q	simple_mlp	0.2	0.05	0.05	8	-100	1000
InitialDNN/839_83_9	none	none	False	0	False	GridWorld	SUNY	2DObs	Individual_Deep_Q	simple_mlp	0.2	0.05	0.05	9	-100	1000
InitialDNN/840_84_0	centralized	none	True	-10	False	GridWorld	MIT	2DObs	Individual_Deep_Q	simple_mlp	0.2	0.05	0	0	-30	1000
InitialDNN/841_84_1	centralized	none	True	-10	False	GridWorld	MIT	2DObs	Individual_Deep_Q	simple_mlp	0.2	0.05	0	1	-30	1000
InitialDNN/842_84_2	centralized	none	True	-10	False	GridWorld	MIT	2DObs	Individual_Deep_Q	simple_mlp	0.2	0.05	0	2	-30	1000
InitialDNN/843_84_3	centralized	none	True	-10	False	GridWorld	MIT	2DObs	Individual_Deep_Q	simple_mlp	0.2	0.05	0	3	-30	1000
InitialDNN/844_84_4	centralized	none	True	-10	False	GridWorld	MIT	2DObs	Individual_Deep_Q	simple_mlp	0.2	0.05	0	4	-30	1000
InitialDNN/845_84_5	centralized	none	True	-10	False	GridWorld	MIT	2DObs	Individual_Deep_Q	simple_mlp	0.2	0.05	0	5	-30	1000
InitialDNN/846_84_6	centralized	none	True	-10	False	GridWorld	MIT	2DObs	Individual_Deep_Q	simple_mlp	0.2	0.05	0	6	-30	1000
InitialDNN/847_84_7	centralized	none	True	-10	False	GridWorld	MIT	2DObs	Individual_Deep_Q	simple_mlp	0.2	0.05	0	7	-30	1000
InitialDNN/848_84_8	centralized	none	True	-10	False	GridWorld	MIT	2DObs	Individual_Deep_Q	simple_mlp	0.2	0.05	0	8	-30	1000
InitialDNN/849_84_9	centralized	none	True	-10	False	GridWorld	MIT	2DObs	Individual_Deep_Q	simple_mlp	0.2	0.05	0	9	-30	1000
InitialDNN/850_85_0	none	none	False	0	False	GridWorld	MIT	2DObs	Individual_Deep_Q	simple_mlp	0.2	0.05	0	0	0	1000
InitialDNN/851_85_1	none	none	False	0	False	GridWorld	MIT	2DObs	Individual_Deep_Q	simple_mlp	0.2	0.05	0	1	0	1000
InitialDNN/852_85_2	none	none	False	0	False	GridWorld	MIT	2DObs	Individual_Deep_Q	simple_mlp	0.2	0.05	0	2	0	1000
InitialDNN/853_85_3	none	none	False	0	False	GridWorld	MIT	2DObs	Individual_Deep_Q	simple_mlp	0.2	0.05	0	3	0	1000
InitialDNN/854_85_4	none	none	False	0	False	GridWorld	MIT	2DObs	Individual_Deep_Q	simple_mlp	0.2	0.05	0	4	0	1000
InitialDNN/855_85_5	none	none	False	0	False	GridWorld	MIT	2DObs	Individual_Deep_Q	simple_mlp	0.2	0.05	0	5	0	1000
InitialDNN/856_85_6	none	none	False	0	False	GridWorld	MIT	2DObs	Individual_Deep_Q	simple_mlp	0.2	0.05	0	6	0	1000
InitialDNN/857_85_7	none	none	False	0	False	GridWorld	MIT	2DObs	Individual_Deep_Q	simple_mlp	0.2	0.05	0	7	0	1000
InitialDNN/858_85_8	none	none	False	0	False	GridWorld	MIT	2DObs	Individual_Deep_Q	simple_mlp	0.2	0.05	0	8	0	1000
InitialDNN/859_85_9	none	none	False	0	False	GridWorld	MIT	2DObs	Individual_Deep_Q	simple_mlp	0.2	0.05	0	9	0	1000
InitialDNN/860_86_0	none	none	False	0	False	GridWorld	MIT	2DObs	Individual_Deep_Q	simple_mlp	0.2	0.05	0	0	-25	1000
InitialDNN/861_86_1	none	none	False	0	False	GridWorld	MIT	2DObs	Individual_Deep_Q	simple_mlp	0.2	0.05	0	1	-25	1000
InitialDNN/862_86_2	none	none	False	0	False	GridWorld	MIT	2DObs	Individual_Deep_Q	simple_mlp	0.2	0.05	0	2	-25	1000
InitialDNN/863_86_3	none	none	False	0	False	GridWorld	MIT	2DObs	Individual_Deep_Q	simple_mlp	0.2	0.05	0	3	-25	1000
InitialDNN/864_86_4	none	none	False	0	False	GridWorld	MIT	2DObs	Individual_Deep_Q	simple_mlp	0.2	0.05	0	4	-25	1000
InitialDNN/865_86_5	none	none	False	0	False	GridWorld	MIT	2DObs	Individual_Deep_Q	simple_mlp	0.2	0.05	0	5	-25	1000
InitialDNN/866_86_6	none	none	False	0	False	GridWorld	MIT	2DObs	Individual_Deep_Q	simple_mlp	0.2	0.05	0	6	-25	1000
InitialDNN/867_86_7	none	none	False	0	False	GridWorld	MIT	2DObs	Individual_Deep_Q	simple_mlp	0.2	0.05	0	7	-25	1000
InitialDNN/868_86_8	none	none	False	0	False	GridWorld	MIT	2DObs	Individual_Deep_Q	simple_mlp	0.2	0.05	0	8	-25	1000
InitialDNN/869_86_9	none	none	False	0	False	GridWorld	MIT	2DObs	Individual_Deep_Q	simple_mlp	0.2	0.05	0	9	-25	1000
InitialDNN/870_87_0	none	none	False	0	False	GridWorld	MIT	2DObs	Individual_Deep_Q	simple_mlp	0.2	0.05	0	0	-50	1000
InitialDNN/871_87_1	none	none	False	0	False	GridWorld	MIT	2DObs	Individual_Deep_Q	simple_mlp	0.2	0.05	0	1	-50	1000
InitialDNN/872_87_2	none	none	False	0	False	GridWorld	MIT	2DObs	Individual_Deep_Q	simple_mlp	0.2	0.05	0	2	-50	1000
InitialDNN/873_87_3	none	none	False	0	False	GridWorld	MIT	2DObs	Individual_Deep_Q	simple_mlp	0.2	0.05	0	3	-50	1000
InitialDNN/874_87_4	none	none	False	0	False	GridWorld	MIT	2DObs	Individual_Deep_Q	simple_mlp	0.2	0.05	0	4	-50	1000
InitialDNN/875_87_5	none	none	False	0	False	GridWorld	MIT	2DObs	Individual_Deep_Q	simple_mlp	0.2	0.05	0	5	-50	1000
InitialDNN/876_87_6	none	none	False	0	False	GridWorld	MIT	2DObs	Individual_Deep_Q	simple_mlp	0.2	0.05	0	6	-50	1000
InitialDNN/877_87_7	none	none	False	0	False	GridWorld	MIT	2DObs	Individual_Deep_Q	simple_mlp	0.2	0.05	0	7	-50	1000
InitialDNN/878_87_8	none	none	False	0	False	GridWorld	MIT	2DObs	Individual_Deep_Q	simple_mlp	0.2	0.05	0	8	-50	1000
InitialDNN/879_87_9	none	none	False	0	False	GridWorld	MIT	2DObs	Individual_Deep_Q	simple_mlp	0.2	0.05	0	9	-50	1000
InitialDNN/880_88_0	none	none	False	0	False	GridWorld	MIT	2DObs	Individual_Deep_Q	simple_mlp	0.2	0.05	0	0	-75	1000
InitialDNN/881_88_1	none	none	False	0	False	GridWorld	MIT	2DObs	Individual_Deep_Q	simple_mlp	0.2	0.05	0	1	-75	1000
InitialDNN/882_88_2	none	none	False	0	False	GridWorld	MIT	2DObs	Individual_Deep_Q	simple_mlp	0.2	0.05	0	2	-75	1000
InitialDNN/883_88_3	none	none	False	0	False	GridWorld	MIT	2DObs	Individual_Deep_Q	simple_mlp	0.2	0.05	0	3	-75	1000
InitialDNN/884_88_4	none	none	False	0	False	GridWorld	MIT	2DObs	Individual_Deep_Q	simple_mlp	0.2	0.05	0	4	-75	1000
InitialDNN/885_88_5	none	none	False	0	False	GridWorld	MIT	2DObs	Individual_Deep_Q	simple_mlp	0.2	0.05	0	5	-75	1000
InitialDNN/886_88_6	none	none	False	0	False	GridWorld	MIT	2DObs	Individual_Deep_Q	simple_mlp	0.2	0.05	0	6	-75	1000
InitialDNN/887_88_7	none	none	False	0	False	GridWorld	MIT	2DObs	Individual_Deep_Q	simple_mlp	0.2	0.05	0	7	-75	1000
InitialDNN/888_88_8	none	none	False	0	False	GridWorld	MIT	2DObs	Individual_Deep_Q	simple_mlp	0.2	0.05	0	8	-75	1000
InitialDNN/889_88_9	none	none	False	0	False	GridWorld	MIT	2DObs	Individual_Deep_Q	simple_mlp	0.2	0.05	0	9	-75	1000
InitialDNN/890_89_0	none	none	False	0	False	GridWorld	MIT	2DObs	Individual_Deep_Q	simple_mlp	0.2	0.05	0	0	-100	1000
InitialDNN/891_89_1	none	none	False	0	False	GridWorld	MIT	2DObs	Individual_Deep_Q	simple_mlp	0.2	0.05	0	1	-100	1000
InitialDNN/892_89_2	none	none	False	0	False	GridWorld	MIT	2DObs	Individual_Deep_Q	simple_mlp	0.2	0.05	0	2	-100	1000
InitialDNN/893_89_3	none	none	False	0	False	GridWorld	MIT	2DObs	Individual_Deep_Q	simple_mlp	0.2	0.05	0	3	-100	1000
InitialDNN/894_89_4	none	none	False	0	False	GridWorld	MIT	2DObs	Individual_Deep_Q	simple_mlp	0.2	0.05	0	4	-100	1000
InitialDNN/895_89_5	none	none	False	0	False	GridWorld	MIT	2DObs	Individual_Deep_Q	simple_mlp	0.2	0.05	0	5	-100	1000
InitialDNN/896_89_6	none	none	False	0	False	GridWorld	MIT	2DObs	Individual_Deep_Q	simple_mlp	0.2	0.05	0	6	-100	1000
InitialDNN/897_89_7	none	none	False	0	False	GridWorld	MIT	2DObs	Individual_Deep_Q	simple_mlp	0.2	0.05	0	7	-100	1000
InitialDNN/898_89_8	none	none	False	0	False	GridWorld	MIT	2DObs	Individual_Deep_Q	simple_mlp	0.2	0.05	0	8	-100	1000
InitialDNN/899_89_9	none	none	False	0	False	GridWorld	MIT	2DObs	Individual_Deep_Q	simple_mlp	0.2	0.05	0	9	-100	1000
InitialDNN/900_90_0	centralized	none	True	-10	False	GridWorld	MIT	2DObs	Individual_Deep_Q	simple_mlp	0.2	0.05	0.05	0	-30	1000
InitialDNN/901_90_1	centralized	none	True	-10	False	GridWorld	MIT	2DObs	Individual_Deep_Q	simple_mlp	0.2	0.05	0.05	1	-30	1000
InitialDNN/902_90_2	centralized	none	True	-10	False	GridWorld	MIT	2DObs	Individual_Deep_Q	simple_mlp	0.2	0.05	0.05	2	-30	1000
InitialDNN/903_90_3	centralized	none	True	-10	False	GridWorld	MIT	2DObs	Individual_Deep_Q	simple_mlp	0.2	0.05	0.05	3	-30	1000
InitialDNN/904_90_4	centralized	none	True	-10	False	GridWorld	MIT	2DObs	Individual_Deep_Q	simple_mlp	0.2	0.05	0.05	4	-30	1000
InitialDNN/905_90_5	centralized	none	True	-10	False	GridWorld	MIT	2DObs	Individual_Deep_Q	simple_mlp	0.2	0.05	0.05	5	-30	1000
InitialDNN/906_90_6	centralized	none	True	-10	False	GridWorld	MIT	2DObs	Individual_Deep_Q	simple_mlp	0.2	0.05	0.05	6	-30	1000
InitialDNN/907_90_7	centralized	none	True	-10	False	GridWorld	MIT	2DObs	Individual_Deep_Q	simple_mlp	0.2	0.05	0.05	7	-30	1000
InitialDNN/908_90_8	centralized	none	True	-10	False	GridWorld	MIT	2DObs	Individual_Deep_Q	simple_mlp	0.2	0.05	0.05	8	-30	1000
InitialDNN/909_90_9	centralized	none	True	-10	False	GridWorld	MIT	2DObs	Individual_Deep_Q	simple_mlp	0.2	0.05	0.05	9	-30	1000
InitialDNN/910_91_0	none	none	False	0	False	GridWorld	MIT	2DObs	Individual_Deep_Q	simple_mlp	0.2	0.05	0.05	0	0	1000
InitialDNN/911_91_1	none	none	False	0	False	GridWorld	MIT	2DObs	Individual_Deep_Q	simple_mlp	0.2	0.05	0.05	1	0	1000
InitialDNN/912_91_2	none	none	False	0	False	GridWorld	MIT	2DObs	Individual_Deep_Q	simple_mlp	0.2	0.05	0.05	2	0	1000
InitialDNN/913_91_3	none	none	False	0	False	GridWorld	MIT	2DObs	Individual_Deep_Q	simple_mlp	0.2	0.05	0.05	3	0	1000
InitialDNN/914_91_4	none	none	False	0	False	GridWorld	MIT	2DObs	Individual_Deep_Q	simple_mlp	0.2	0.05	0.05	4	0	1000
InitialDNN/915_91_5	none	none	False	0	False	GridWorld	MIT	2DObs	Individual_Deep_Q	simple_mlp	0.2	0.05	0.05	5	0	1000
InitialDNN/916_91_6	none	none	False	0	False	GridWorld	MIT	2DObs	Individual_Deep_Q	simple_mlp	0.2	0.05	0.05	6	0	1000
InitialDNN/917_91_7	none	none	False	0	False	GridWorld	MIT	2DObs	Individual_Deep_Q	simple_mlp	0.2	0.05	0.05	7	0	1000
InitialDNN/918_91_8	none	none	False	0	False	GridWorld	MIT	2DObs	Individual_Deep_Q	simple_mlp	0.2	0.05	0.05	8	0	1000
InitialDNN/919_91_9	none	none	False	0	False	GridWorld	MIT	2DObs	Individual_Deep_Q	simple_mlp	0.2	0.05	0.05	9	0	1000
InitialDNN/920_92_0	none	none	False	0	False	GridWorld	MIT	2DObs	Individual_Deep_Q	simple_mlp	0.2	0.05	0.05	0	-25	1000
InitialDNN/921_92_1	none	none	False	0	False	GridWorld	MIT	2DObs	Individual_Deep_Q	simple_mlp	0.2	0.05	0.05	1	-25	1000
InitialDNN/922_92_2	none	none	False	0	False	GridWorld	MIT	2DObs	Individual_Deep_Q	simple_mlp	0.2	0.05	0.05	2	-25	1000
InitialDNN/923_92_3	none	none	False	0	False	GridWorld	MIT	2DObs	Individual_Deep_Q	simple_mlp	0.2	0.05	0.05	3	-25	1000
InitialDNN/924_92_4	none	none	False	0	False	GridWorld	MIT	2DObs	Individual_Deep_Q	simple_mlp	0.2	0.05	0.05	4	-25	1000
InitialDNN/925_92_5	none	none	False	0	False	GridWorld	MIT	2DObs	Individual_Deep_Q	simple_mlp	0.2	0.05	0.05	5	-25	1000
InitialDNN/926_92_6	none	none	False	0	False	GridWorld	MIT	2DObs	Individual_Deep_Q	simple_mlp	0.2	0.05	0.05	6	-25	1000
InitialDNN/927_92_7	none	none	False	0	False	GridWorld	MIT	2DObs	Individual_Deep_Q	simple_mlp	0.2	0.05	0.05	7	-25	1000
InitialDNN/928_92_8	none	none	False	0	False	GridWorld	MIT	2DObs	Individual_Deep_Q	simple_mlp	0.2	0.05	0.05	8	-25	1000
InitialDNN/929_92_9	none	none	False	0	False	GridWorld	MIT	2DObs	Individual_Deep_Q	simple_mlp	0.2	0.05	0.05	9	-25	1000
InitialDNN/930_93_0	none	none	False	0	False	GridWorld	MIT	2DObs	Individual_Deep_Q	simple_mlp	0.2	0.05	0.05	0	-50	1000
InitialDNN/931_93_1	none	none	False	0	False	GridWorld	MIT	2DObs	Individual_Deep_Q	simple_mlp	0.2	0.05	0.05	1	-50	1000
InitialDNN/932_93_2	none	none	False	0	False	GridWorld	MIT	2DObs	Individual_Deep_Q	simple_mlp	0.2	0.05	0.05	2	-50	1000
InitialDNN/933_93_3	none	none	False	0	False	GridWorld	MIT	2DObs	Individual_Deep_Q	simple_mlp	0.2	0.05	0.05	3	-50	1000
InitialDNN/934_93_4	none	none	False	0	False	GridWorld	MIT	2DObs	Individual_Deep_Q	simple_mlp	0.2	0.05	0.05	4	-50	1000
InitialDNN/935_93_5	none	none	False	0	False	GridWorld	MIT	2DObs	Individual_Deep_Q	simple_mlp	0.2	0.05	0.05	5	-50	1000
InitialDNN/936_93_6	none	none	False	0	False	GridWorld	MIT	2DObs	Individual_Deep_Q	simple_mlp	0.2	0.05	0.05	6	-50	1000
InitialDNN/937_93_7	none	none	False	0	False	GridWorld	MIT	2DObs	Individual_Deep_Q	simple_mlp	0.2	0.05	0.05	7	-50	1000
InitialDNN/938_93_8	none	none	False	0	False	GridWorld	MIT	2DObs	Individual_Deep_Q	simple_mlp	0.2	0.05	0.05	8	-50	1000
InitialDNN/939_93_9	none	none	False	0	False	GridWorld	MIT	2DObs	Individual_Deep_Q	simple_mlp	0.2	0.05	0.05	9	-50	1000
InitialDNN/940_94_0	none	none	False	0	False	GridWorld	MIT	2DObs	Individual_Deep_Q	simple_mlp	0.2	0.05	0.05	0	-75	1000
InitialDNN/941_94_1	none	none	False	0	False	GridWorld	MIT	2DObs	Individual_Deep_Q	simple_mlp	0.2	0.05	0.05	1	-75	1000
InitialDNN/942_94_2	none	none	False	0	False	GridWorld	MIT	2DObs	Individual_Deep_Q	simple_mlp	0.2	0.05	0.05	2	-75	1000
InitialDNN/943_94_3	none	none	False	0	False	GridWorld	MIT	2DObs	Individual_Deep_Q	simple_mlp	0.2	0.05	0.05	3	-75	1000
InitialDNN/944_94_4	none	none	False	0	False	GridWorld	MIT	2DObs	Individual_Deep_Q	simple_mlp	0.2	0.05	0.05	4	-75	1000
InitialDNN/945_94_5	none	none	False	0	False	GridWorld	MIT	2DObs	Individual_Deep_Q	simple_mlp	0.2	0.05	0.05	5	-75	1000
InitialDNN/946_94_6	none	none	False	0	False	GridWorld	MIT	2DObs	Individual_Deep_Q	simple_mlp	0.2	0.05	0.05	6	-75	1000
InitialDNN/947_94_7	none	none	False	0	False	GridWorld	MIT	2DObs	Individual_Deep_Q	simple_mlp	0.2	0.05	0.05	7	-75	1000
InitialDNN/948_94_8	none	none	False	0	False	GridWorld	MIT	2DObs	Individual_Deep_Q	simple_mlp	0.2	0.05	0.05	8	-75	1000
InitialDNN/949_94_9	none	none	False	0	False	GridWorld	MIT	2DObs	Individual_Deep_Q	simple_mlp	0.2	0.05	0.05	9	-75	1000
InitialDNN/950_95_0	none	none	False	0	False	GridWorld	MIT	2DObs	Individual_Deep_Q	simple_mlp	0.2	0.05	0.05	0	-100	1000
InitialDNN/951_95_1	none	none	False	0	False	GridWorld	MIT	2DObs	Individual_Deep_Q	simple_mlp	0.2	0.05	0.05	1	-100	1000
InitialDNN/952_95_2	none	none	False	0	False	GridWorld	MIT	2DObs	Individual_Deep_Q	simple_mlp	0.2	0.05	0.05	2	-100	1000
InitialDNN/953_95_3	none	none	False	0	False	GridWorld	MIT	2DObs	Individual_Deep_Q	simple_mlp	0.2	0.05	0.05	3	-100	1000
InitialDNN/954_95_4	none	none	False	0	False	GridWorld	MIT	2DObs	Individual_Deep_Q	simple_mlp	0.2	0.05	0.05	4	-100	1000
InitialDNN/955_95_5	none	none	False	0	False	GridWorld	MIT	2DObs	Individual_Deep_Q	simple_mlp	0.2	0.05	0.05	5	-100	1000
InitialDNN/956_95_6	none	none	False	0	False	GridWorld	MIT	2DObs	Individual_Deep_Q	simple_mlp	0.2	0.05	0.05	6	-100	1000
InitialDNN/957_95_7	none	none	False	0	False	GridWorld	MIT	2DObs	Individual_Deep_Q	simple_mlp	0.2	0.05	0.05	7	-100	1000
InitialDNN/958_95_8	none	none	False	0	False	GridWorld	MIT	2DObs	Individual_Deep_Q	simple_mlp	0.2	0.05	0.05	8	-100	1000
InitialDNN/959_95_9	none	none	False	0	False	GridWorld	MIT	2DObs	Individual_Deep_Q	simple_mlp	0.2	0.05	0.05	9	-100	1000
