# Supplementary material
Source: ML conference proceedings conference paper supplement (https://proceedings.neurips.cc/paper_files/paper/2022/hash/57444e14ecd9e2c8f603b4f012ce3811-Abstract.html)
Supplement: Supplementary file 1 [file 57444e14ecd9e2c8f603b4f012ce3811-Supplemental-Conference.zip › 3410_shield_decentralization_for_sa-Supplementary Material/parallel_configs/InitialDNNSmall.csv]

run_name	shield	evaluation_shield	punish_unsafe_orig_action	punish_unsafe_orig_action_modifier	randomize_starts	map_type	grid_world_map_name	grid_world_obs_type	learner_type	learner_deep_network_model	learner_anneal_eps_start	learner_anneal_eps_finish	learner_evaluation_epsilon	seed	grid_world_collision_penalty	max_num_episodes
InitialDNNSmall/0_0_0	centralized	none	True	-10	False	GridWorld	Pentagon	FullObsDiscrete	Individual_Q		0.2	0.05	0	0	-30	1000
InitialDNNSmall/1_0_1	centralized	none	True	-10	False	GridWorld	Pentagon	FullObsDiscrete	Individual_Q		0.2	0.05	0	1	-30	1000
InitialDNNSmall/2_0_2	centralized	none	True	-10	False	GridWorld	Pentagon	FullObsDiscrete	Individual_Q		0.2	0.05	0	2	-30	1000
InitialDNNSmall/3_1_0	none	none	False	0	False	GridWorld	Pentagon	FullObsDiscrete	Individual_Q		0.2	0.05	0	0	0	1000
InitialDNNSmall/4_1_1	none	none	False	0	False	GridWorld	Pentagon	FullObsDiscrete	Individual_Q		0.2	0.05	0	1	0	1000
InitialDNNSmall/5_1_2	none	none	False	0	False	GridWorld	Pentagon	FullObsDiscrete	Individual_Q		0.2	0.05	0	2	0	1000
InitialDNNSmall/6_2_0	none	none	False	0	False	GridWorld	Pentagon	FullObsDiscrete	Individual_Q		0.2	0.05	0	0	-25	1000
InitialDNNSmall/7_2_1	none	none	False	0	False	GridWorld	Pentagon	FullObsDiscrete	Individual_Q		0.2	0.05	0	1	-25	1000
InitialDNNSmall/8_2_2	none	none	False	0	False	GridWorld	Pentagon	FullObsDiscrete	Individual_Q		0.2	0.05	0	2	-25	1000
InitialDNNSmall/9_3_0	none	none	False	0	False	GridWorld	Pentagon	FullObsDiscrete	Individual_Q		0.2	0.05	0	0	-50	1000
InitialDNNSmall/10_3_1	none	none	False	0	False	GridWorld	Pentagon	FullObsDiscrete	Individual_Q		0.2	0.05	0	1	-50	1000
InitialDNNSmall/11_3_2	none	none	False	0	False	GridWorld	Pentagon	FullObsDiscrete	Individual_Q		0.2	0.05	0	2	-50	1000
InitialDNNSmall/12_4_0	none	none	False	0	False	GridWorld	Pentagon	FullObsDiscrete	Individual_Q		0.2	0.05	0	0	-75	1000
InitialDNNSmall/13_4_1	none	none	False	0	False	GridWorld	Pentagon	FullObsDiscrete	Individual_Q		0.2	0.05	0	1	-75	1000
InitialDNNSmall/14_4_2	none	none	False	0	False	GridWorld	Pentagon	FullObsDiscrete	Individual_Q		0.2	0.05	0	2	-75	1000
InitialDNNSmall/15_5_0	none	none	False	0	False	GridWorld	Pentagon	FullObsDiscrete	Individual_Q		0.2	0.05	0	0	-100	1000
InitialDNNSmall/16_5_1	none	none	False	0	False	GridWorld	Pentagon	FullObsDiscrete	Individual_Q		0.2	0.05	0	1	-100	1000
InitialDNNSmall/17_5_2	none	none	False	0	False	GridWorld	Pentagon	FullObsDiscrete	Individual_Q		0.2	0.05	0	2	-100	1000
InitialDNNSmall/18_6_0	centralized	none	True	-10	False	GridWorld	Pentagon	FullObsDiscrete	Individual_Q		0.2	0.05	0.05	0	-30	1000
InitialDNNSmall/19_6_1	centralized	none	True	-10	False	GridWorld	Pentagon	FullObsDiscrete	Individual_Q		0.2	0.05	0.05	1	-30	1000
InitialDNNSmall/20_6_2	centralized	none	True	-10	False	GridWorld	Pentagon	FullObsDiscrete	Individual_Q		0.2	0.05	0.05	2	-30	1000
InitialDNNSmall/21_7_0	none	none	False	0	False	GridWorld	Pentagon	FullObsDiscrete	Individual_Q		0.2	0.05	0.05	0	0	1000
InitialDNNSmall/22_7_1	none	none	False	0	False	GridWorld	Pentagon	FullObsDiscrete	Individual_Q		0.2	0.05	0.05	1	0	1000
InitialDNNSmall/23_7_2	none	none	False	0	False	GridWorld	Pentagon	FullObsDiscrete	Individual_Q		0.2	0.05	0.05	2	0	1000
InitialDNNSmall/24_8_0	none	none	False	0	False	GridWorld	Pentagon	FullObsDiscrete	Individual_Q		0.2	0.05	0.05	0	-25	1000
InitialDNNSmall/25_8_1	none	none	False	0	False	GridWorld	Pentagon	FullObsDiscrete	Individual_Q		0.2	0.05	0.05	1	-25	1000
InitialDNNSmall/26_8_2	none	none	False	0	False	GridWorld	Pentagon	FullObsDiscrete	Individual_Q		0.2	0.05	0.05	2	-25	1000
InitialDNNSmall/27_9_0	none	none	False	0	False	GridWorld	Pentagon	FullObsDiscrete	Individual_Q		0.2	0.05	0.05	0	-50	1000
InitialDNNSmall/28_9_1	none	none	False	0	False	GridWorld	Pentagon	FullObsDiscrete	Individual_Q		0.2	0.05	0.05	1	-50	1000
InitialDNNSmall/29_9_2	none	none	False	0	False	GridWorld	Pentagon	FullObsDiscrete	Individual_Q		0.2	0.05	0.05	2	-50	1000
InitialDNNSmall/30_10_0	none	none	False	0	False	GridWorld	Pentagon	FullObsDiscrete	Individual_Q		0.2	0.05	0.05	0	-75	1000
InitialDNNSmall/31_10_1	none	none	False	0	False	GridWorld	Pentagon	FullObsDiscrete	Individual_Q		0.2	0.05	0.05	1	-75	1000
InitialDNNSmall/32_10_2	none	none	False	0	False	GridWorld	Pentagon	FullObsDiscrete	Individual_Q		0.2	0.05	0.05	2	-75	1000
InitialDNNSmall/33_11_0	none	none	False	0	False	GridWorld	Pentagon	FullObsDiscrete	Individual_Q		0.2	0.05	0.05	0	-100	1000
InitialDNNSmall/34_11_1	none	none	False	0	False	GridWorld	Pentagon	FullObsDiscrete	Individual_Q		0.2	0.05	0.05	1	-100	1000
InitialDNNSmall/35_11_2	none	none	False	0	False	GridWorld	Pentagon	FullObsDiscrete	Individual_Q		0.2	0.05	0.05	2	-100	1000
InitialDNNSmall/36_12_0	centralized	none	True	-10	False	GridWorld	ISR	FullObsDiscrete	Individual_Q		0.2	0.05	0	0	-30	1000
InitialDNNSmall/37_12_1	centralized	none	True	-10	False	GridWorld	ISR	FullObsDiscrete	Individual_Q		0.2	0.05	0	1	-30	1000
InitialDNNSmall/38_12_2	centralized	none	True	-10	False	GridWorld	ISR	FullObsDiscrete	Individual_Q		0.2	0.05	0	2	-30	1000
InitialDNNSmall/39_13_0	none	none	False	0	False	GridWorld	ISR	FullObsDiscrete	Individual_Q		0.2	0.05	0	0	0	1000
InitialDNNSmall/40_13_1	none	none	False	0	False	GridWorld	ISR	FullObsDiscrete	Individual_Q		0.2	0.05	0	1	0	1000
InitialDNNSmall/41_13_2	none	none	False	0	False	GridWorld	ISR	FullObsDiscrete	Individual_Q		0.2	0.05	0	2	0	1000
InitialDNNSmall/42_14_0	none	none	False	0	False	GridWorld	ISR	FullObsDiscrete	Individual_Q		0.2	0.05	0	0	-25	1000
InitialDNNSmall/43_14_1	none	none	False	0	False	GridWorld	ISR	FullObsDiscrete	Individual_Q		0.2	0.05	0	1	-25	1000
InitialDNNSmall/44_14_2	none	none	False	0	False	GridWorld	ISR	FullObsDiscrete	Individual_Q		0.2	0.05	0	2	-25	1000
InitialDNNSmall/45_15_0	none	none	False	0	False	GridWorld	ISR	FullObsDiscrete	Individual_Q		0.2	0.05	0	0	-50	1000
InitialDNNSmall/46_15_1	none	none	False	0	False	GridWorld	ISR	FullObsDiscrete	Individual_Q		0.2	0.05	0	1	-50	1000
InitialDNNSmall/47_15_2	none	none	False	0	False	GridWorld	ISR	FullObsDiscrete	Individual_Q		0.2	0.05	0	2	-50	1000
InitialDNNSmall/48_16_0	none	none	False	0	False	GridWorld	ISR	FullObsDiscrete	Individual_Q		0.2	0.05	0	0	-75	1000
InitialDNNSmall/49_16_1	none	none	False	0	False	GridWorld	ISR	FullObsDiscrete	Individual_Q		0.2	0.05	0	1	-75	1000
InitialDNNSmall/50_16_2	none	none	False	0	False	GridWorld	ISR	FullObsDiscrete	Individual_Q		0.2	0.05	0	2	-75	1000
InitialDNNSmall/51_17_0	none	none	False	0	False	GridWorld	ISR	FullObsDiscrete	Individual_Q		0.2	0.05	0	0	-100	1000
InitialDNNSmall/52_17_1	none	none	False	0	False	GridWorld	ISR	FullObsDiscrete	Individual_Q		0.2	0.05	0	1	-100	1000
InitialDNNSmall/53_17_2	none	none	False	0	False	GridWorld	ISR	FullObsDiscrete	Individual_Q		0.2	0.05	0	2	-100	1000
InitialDNNSmall/54_18_0	centralized	none	True	-10	False	GridWorld	ISR	FullObsDiscrete	Individual_Q		0.2	0.05	0.05	0	-30	1000
InitialDNNSmall/55_18_1	centralized	none	True	-10	False	GridWorld	ISR	FullObsDiscrete	Individual_Q		0.2	0.05	0.05	1	-30	1000
InitialDNNSmall/56_18_2	centralized	none	True	-10	False	GridWorld	ISR	FullObsDiscrete	Individual_Q		0.2	0.05	0.05	2	-30	1000
InitialDNNSmall/57_19_0	none	none	False	0	False	GridWorld	ISR	FullObsDiscrete	Individual_Q		0.2	0.05	0.05	0	0	1000
InitialDNNSmall/58_19_1	none	none	False	0	False	GridWorld	ISR	FullObsDiscrete	Individual_Q		0.2	0.05	0.05	1	0	1000
InitialDNNSmall/59_19_2	none	none	False	0	False	GridWorld	ISR	FullObsDiscrete	Individual_Q		0.2	0.05	0.05	2	0	1000
InitialDNNSmall/60_20_0	none	none	False	0	False	GridWorld	ISR	FullObsDiscrete	Individual_Q		0.2	0.05	0.05	0	-25	1000
InitialDNNSmall/61_20_1	none	none	False	0	False	GridWorld	ISR	FullObsDiscrete	Individual_Q		0.2	0.05	0.05	1	-25	1000
InitialDNNSmall/62_20_2	none	none	False	0	False	GridWorld	ISR	FullObsDiscrete	Individual_Q		0.2	0.05	0.05	2	-25	1000
InitialDNNSmall/63_21_0	none	none	False	0	False	GridWorld	ISR	FullObsDiscrete	Individual_Q		0.2	0.05	0.05	0	-50	1000
InitialDNNSmall/64_21_1	none	none	False	0	False	GridWorld	ISR	FullObsDiscrete	Individual_Q		0.2	0.05	0.05	1	-50	1000
InitialDNNSmall/65_21_2	none	none	False	0	False	GridWorld	ISR	FullObsDiscrete	Individual_Q		0.2	0.05	0.05	2	-50	1000
InitialDNNSmall/66_22_0	none	none	False	0	False	GridWorld	ISR	FullObsDiscrete	Individual_Q		0.2	0.05	0.05	0	-75	1000
InitialDNNSmall/67_22_1	none	none	False	0	False	GridWorld	ISR	FullObsDiscrete	Individual_Q		0.2	0.05	0.05	1	-75	1000
InitialDNNSmall/68_22_2	none	none	False	0	False	GridWorld	ISR	FullObsDiscrete	Individual_Q		0.2	0.05	0.05	2	-75	1000
InitialDNNSmall/69_23_0	none	none	False	0	False	GridWorld	ISR	FullObsDiscrete	Individual_Q		0.2	0.05	0.05	0	-100	1000
InitialDNNSmall/70_23_1	none	none	False	0	False	GridWorld	ISR	FullObsDiscrete	Individual_Q		0.2	0.05	0.05	1	-100	1000
InitialDNNSmall/71_23_2	none	none	False	0	False	GridWorld	ISR	FullObsDiscrete	Individual_Q		0.2	0.05	0.05	2	-100	1000
InitialDNNSmall/72_24_0	centralized	none	True	-10	False	GridWorld	SUNY	FullObsDiscrete	Individual_Q		0.2	0.05	0	0	-30	1000
InitialDNNSmall/73_24_1	centralized	none	True	-10	False	GridWorld	SUNY	FullObsDiscrete	Individual_Q		0.2	0.05	0	1	-30	1000
InitialDNNSmall/74_24_2	centralized	none	True	-10	False	GridWorld	SUNY	FullObsDiscrete	Individual_Q		0.2	0.05	0	2	-30	1000
InitialDNNSmall/75_25_0	none	none	False	0	False	GridWorld	SUNY	FullObsDiscrete	Individual_Q		0.2	0.05	0	0	0	1000
InitialDNNSmall/76_25_1	none	none	False	0	False	GridWorld	SUNY	FullObsDiscrete	Individual_Q		0.2	0.05	0	1	0	1000
InitialDNNSmall/77_25_2	none	none	False	0	False	GridWorld	SUNY	FullObsDiscrete	Individual_Q		0.2	0.05	0	2	0	1000
InitialDNNSmall/78_26_0	none	none	False	0	False	GridWorld	SUNY	FullObsDiscrete	Individual_Q		0.2	0.05	0	0	-25	1000
InitialDNNSmall/79_26_1	none	none	False	0	False	GridWorld	SUNY	FullObsDiscrete	Individual_Q		0.2	0.05	0	1	-25	1000
InitialDNNSmall/80_26_2	none	none	False	0	False	GridWorld	SUNY	FullObsDiscrete	Individual_Q		0.2	0.05	0	2	-25	1000
InitialDNNSmall/81_27_0	none	none	False	0	False	GridWorld	SUNY	FullObsDiscrete	Individual_Q		0.2	0.05	0	0	-50	1000
InitialDNNSmall/82_27_1	none	none	False	0	False	GridWorld	SUNY	FullObsDiscrete	Individual_Q		0.2	0.05	0	1	-50	1000
InitialDNNSmall/83_27_2	none	none	False	0	False	GridWorld	SUNY	FullObsDiscrete	Individual_Q		0.2	0.05	0	2	-50	1000
InitialDNNSmall/84_28_0	none	none	False	0	False	GridWorld	SUNY	FullObsDiscrete	Individual_Q		0.2	0.05	0	0	-75	1000
InitialDNNSmall/85_28_1	none	none	False	0	False	GridWorld	SUNY	FullObsDiscrete	Individual_Q		0.2	0.05	0	1	-75	1000
InitialDNNSmall/86_28_2	none	none	False	0	False	GridWorld	SUNY	FullObsDiscrete	Individual_Q		0.2	0.05	0	2	-75	1000
InitialDNNSmall/87_29_0	none	none	False	0	False	GridWorld	SUNY	FullObsDiscrete	Individual_Q		0.2	0.05	0	0	-100	1000
InitialDNNSmall/88_29_1	none	none	False	0	False	GridWorld	SUNY	FullObsDiscrete	Individual_Q		0.2	0.05	0	1	-100	1000
InitialDNNSmall/89_29_2	none	none	False	0	False	GridWorld	SUNY	FullObsDiscrete	Individual_Q		0.2	0.05	0	2	-100	1000
InitialDNNSmall/90_30_0	centralized	none	True	-10	False	GridWorld	SUNY	FullObsDiscrete	Individual_Q		0.2	0.05	0.05	0	-30	1000
InitialDNNSmall/91_30_1	centralized	none	True	-10	False	GridWorld	SUNY	FullObsDiscrete	Individual_Q		0.2	0.05	0.05	1	-30	1000
InitialDNNSmall/92_30_2	centralized	none	True	-10	False	GridWorld	SUNY	FullObsDiscrete	Individual_Q		0.2	0.05	0.05	2	-30	1000
InitialDNNSmall/93_31_0	none	none	False	0	False	GridWorld	SUNY	FullObsDiscrete	Individual_Q		0.2	0.05	0.05	0	0	1000
InitialDNNSmall/94_31_1	none	none	False	0	False	GridWorld	SUNY	FullObsDiscrete	Individual_Q		0.2	0.05	0.05	1	0	1000
InitialDNNSmall/95_31_2	none	none	False	0	False	GridWorld	SUNY	FullObsDiscrete	Individual_Q		0.2	0.05	0.05	2	0	1000
InitialDNNSmall/96_32_0	none	none	False	0	False	GridWorld	SUNY	FullObsDiscrete	Individual_Q		0.2	0.05	0.05	0	-25	1000
InitialDNNSmall/97_32_1	none	none	False	0	False	GridWorld	SUNY	FullObsDiscrete	Individual_Q		0.2	0.05	0.05	1	-25	1000
InitialDNNSmall/98_32_2	none	none	False	0	False	GridWorld	SUNY	FullObsDiscrete	Individual_Q		0.2	0.05	0.05	2	-25	1000
InitialDNNSmall/99_33_0	none	none	False	0	False	GridWorld	SUNY	FullObsDiscrete	Individual_Q		0.2	0.05	0.05	0	-50	1000
InitialDNNSmall/100_33_1	none	none	False	0	False	GridWorld	SUNY	FullObsDiscrete	Individual_Q		0.2	0.05	0.05	1	-50	1000
InitialDNNSmall/101_33_2	none	none	False	0	False	GridWorld	SUNY	FullObsDiscrete	Individual_Q		0.2	0.05	0.05	2	-50	1000
InitialDNNSmall/102_34_0	none	none	False	0	False	GridWorld	SUNY	FullObsDiscrete	Individual_Q		0.2	0.05	0.05	0	-75	1000
InitialDNNSmall/103_34_1	none	none	False	0	False	GridWorld	SUNY	FullObsDiscrete	Individual_Q		0.2	0.05	0.05	1	-75	1000
InitialDNNSmall/104_34_2	none	none	False	0	False	GridWorld	SUNY	FullObsDiscrete	Individual_Q		0.2	0.05	0.05	2	-75	1000
InitialDNNSmall/105_35_0	none	none	False	0	False	GridWorld	SUNY	FullObsDiscrete	Individual_Q		0.2	0.05	0.05	0	-100	1000
InitialDNNSmall/106_35_1	none	none	False	0	False	GridWorld	SUNY	FullObsDiscrete	Individual_Q		0.2	0.05	0.05	1	-100	1000
InitialDNNSmall/107_35_2	none	none	False	0	False	GridWorld	SUNY	FullObsDiscrete	Individual_Q		0.2	0.05	0.05	2	-100	1000
InitialDNNSmall/108_36_0	centralized	none	True	-10	False	GridWorld	MIT	FullObsDiscrete	Individual_Q		0.2	0.05	0	0	-30	1000
InitialDNNSmall/109_36_1	centralized	none	True	-10	False	GridWorld	MIT	FullObsDiscrete	Individual_Q		0.2	0.05	0	1	-30	1000
InitialDNNSmall/110_36_2	centralized	none	True	-10	False	GridWorld	MIT	FullObsDiscrete	Individual_Q		0.2	0.05	0	2	-30	1000
InitialDNNSmall/111_37_0	none	none	False	0	False	GridWorld	MIT	FullObsDiscrete	Individual_Q		0.2	0.05	0	0	0	1000
InitialDNNSmall/112_37_1	none	none	False	0	False	GridWorld	MIT	FullObsDiscrete	Individual_Q		0.2	0.05	0	1	0	1000
InitialDNNSmall/113_37_2	none	none	False	0	False	GridWorld	MIT	FullObsDiscrete	Individual_Q		0.2	0.05	0	2	0	1000
InitialDNNSmall/114_38_0	none	none	False	0	False	GridWorld	MIT	FullObsDiscrete	Individual_Q		0.2	0.05	0	0	-25	1000
InitialDNNSmall/115_38_1	none	none	False	0	False	GridWorld	MIT	FullObsDiscrete	Individual_Q		0.2	0.05	0	1	-25	1000
InitialDNNSmall/116_38_2	none	none	False	0	False	GridWorld	MIT	FullObsDiscrete	Individual_Q		0.2	0.05	0	2	-25	1000
InitialDNNSmall/117_39_0	none	none	False	0	False	GridWorld	MIT	FullObsDiscrete	Individual_Q		0.2	0.05	0	0	-50	1000
InitialDNNSmall/118_39_1	none	none	False	0	False	GridWorld	MIT	FullObsDiscrete	Individual_Q		0.2	0.05	0	1	-50	1000
InitialDNNSmall/119_39_2	none	none	False	0	False	GridWorld	MIT	FullObsDiscrete	Individual_Q		0.2	0.05	0	2	-50	1000
InitialDNNSmall/120_40_0	none	none	False	0	False	GridWorld	MIT	FullObsDiscrete	Individual_Q		0.2	0.05	0	0	-75	1000
InitialDNNSmall/121_40_1	none	none	False	0	False	GridWorld	MIT	FullObsDiscrete	Individual_Q		0.2	0.05	0	1	-75	1000
InitialDNNSmall/122_40_2	none	none	False	0	False	GridWorld	MIT	FullObsDiscrete	Individual_Q		0.2	0.05	0	2	-75	1000
InitialDNNSmall/123_41_0	none	none	False	0	False	GridWorld	MIT	FullObsDiscrete	Individual_Q		0.2	0.05	0	0	-100	1000
InitialDNNSmall/124_41_1	none	none	False	0	False	GridWorld	MIT	FullObsDiscrete	Individual_Q		0.2	0.05	0	1	-100	1000
InitialDNNSmall/125_41_2	none	none	False	0	False	GridWorld	MIT	FullObsDiscrete	Individual_Q		0.2	0.05	0	2	-100	1000
InitialDNNSmall/126_42_0	centralized	none	True	-10	False	GridWorld	MIT	FullObsDiscrete	Individual_Q		0.2	0.05	0.05	0	-30	1000
InitialDNNSmall/127_42_1	centralized	none	True	-10	False	GridWorld	MIT	FullObsDiscrete	Individual_Q		0.2	0.05	0.05	1	-30	1000
InitialDNNSmall/128_42_2	centralized	none	True	-10	False	GridWorld	MIT	FullObsDiscrete	Individual_Q		0.2	0.05	0.05	2	-30	1000
InitialDNNSmall/129_43_0	none	none	False	0	False	GridWorld	MIT	FullObsDiscrete	Individual_Q		0.2	0.05	0.05	0	0	1000
InitialDNNSmall/130_43_1	none	none	False	0	False	GridWorld	MIT	FullObsDiscrete	Individual_Q		0.2	0.05	0.05	1	0	1000
InitialDNNSmall/131_43_2	none	none	False	0	False	GridWorld	MIT	FullObsDiscrete	Individual_Q		0.2	0.05	0.05	2	0	1000
InitialDNNSmall/132_44_0	none	none	False	0	False	GridWorld	MIT	FullObsDiscrete	Individual_Q		0.2	0.05	0.05	0	-25	1000
InitialDNNSmall/133_44_1	none	none	False	0	False	GridWorld	MIT	FullObsDiscrete	Individual_Q		0.2	0.05	0.05	1	-25	1000
InitialDNNSmall/134_44_2	none	none	False	0	False	GridWorld	MIT	FullObsDiscrete	Individual_Q		0.2	0.05	0.05	2	-25	1000
InitialDNNSmall/135_45_0	none	none	False	0	False	GridWorld	MIT	FullObsDiscrete	Individual_Q		0.2	0.05	0.05	0	-50	1000
InitialDNNSmall/136_45_1	none	none	False	0	False	GridWorld	MIT	FullObsDiscrete	Individual_Q		0.2	0.05	0.05	1	-50	1000
InitialDNNSmall/137_45_2	none	none	False	0	False	GridWorld	MIT	FullObsDiscrete	Individual_Q		0.2	0.05	0.05	2	-50	1000
InitialDNNSmall/138_46_0	none	none	False	0	False	GridWorld	MIT	FullObsDiscrete	Individual_Q		0.2	0.05	0.05	0	-75	1000
InitialDNNSmall/139_46_1	none	none	False	0	False	GridWorld	MIT	FullObsDiscrete	Individual_Q		0.2	0.05	0.05	1	-75	1000
InitialDNNSmall/140_46_2	none	none	False	0	False	GridWorld	MIT	FullObsDiscrete	Individual_Q		0.2	0.05	0.05	2	-75	1000
InitialDNNSmall/141_47_0	none	none	False	0	False	GridWorld	MIT	FullObsDiscrete	Individual_Q		0.2	0.05	0.05	0	-100	1000
InitialDNNSmall/142_47_1	none	none	False	0	False	GridWorld	MIT	FullObsDiscrete	Individual_Q		0.2	0.05	0.05	1	-100	1000
InitialDNNSmall/143_47_2	none	none	False	0	False	GridWorld	MIT	FullObsDiscrete	Individual_Q		0.2	0.05	0.05	2	-100	1000
InitialDNNSmall/144_48_0	centralized	none	True	-10	False	GridWorld	Pentagon	2DObs	Individual_Deep_Q	simple_mlp	0.2	0.05	0	0	-30	1000
InitialDNNSmall/145_48_1	centralized	none	True	-10	False	GridWorld	Pentagon	2DObs	Individual_Deep_Q	simple_mlp	0.2	0.05	0	1	-30	1000
InitialDNNSmall/146_48_2	centralized	none	True	-10	False	GridWorld	Pentagon	2DObs	Individual_Deep_Q	simple_mlp	0.2	0.05	0	2	-30	1000
InitialDNNSmall/147_49_0	none	none	False	0	False	GridWorld	Pentagon	2DObs	Individual_Deep_Q	simple_mlp	0.2	0.05	0	0	0	1000
InitialDNNSmall/148_49_1	none	none	False	0	False	GridWorld	Pentagon	2DObs	Individual_Deep_Q	simple_mlp	0.2	0.05	0	1	0	1000
InitialDNNSmall/149_49_2	none	none	False	0	False	GridWorld	Pentagon	2DObs	Individual_Deep_Q	simple_mlp	0.2	0.05	0	2	0	1000
InitialDNNSmall/150_50_0	none	none	False	0	False	GridWorld	Pentagon	2DObs	Individual_Deep_Q	simple_mlp	0.2	0.05	0	0	-25	1000
InitialDNNSmall/151_50_1	none	none	False	0	False	GridWorld	Pentagon	2DObs	Individual_Deep_Q	simple_mlp	0.2	0.05	0	1	-25	1000
InitialDNNSmall/152_50_2	none	none	False	0	False	GridWorld	Pentagon	2DObs	Individual_Deep_Q	simple_mlp	0.2	0.05	0	2	-25	1000
InitialDNNSmall/153_51_0	none	none	False	0	False	GridWorld	Pentagon	2DObs	Individual_Deep_Q	simple_mlp	0.2	0.05	0	0	-50	1000
InitialDNNSmall/154_51_1	none	none	False	0	False	GridWorld	Pentagon	2DObs	Individual_Deep_Q	simple_mlp	0.2	0.05	0	1	-50	1000
InitialDNNSmall/155_51_2	none	none	False	0	False	GridWorld	Pentagon	2DObs	Individual_Deep_Q	simple_mlp	0.2	0.05	0	2	-50	1000
InitialDNNSmall/156_52_0	none	none	False	0	False	GridWorld	Pentagon	2DObs	Individual_Deep_Q	simple_mlp	0.2	0.05	0	0	-75	1000
InitialDNNSmall/157_52_1	none	none	False	0	False	GridWorld	Pentagon	2DObs	Individual_Deep_Q	simple_mlp	0.2	0.05	0	1	-75	1000
InitialDNNSmall/158_52_2	none	none	False	0	False	GridWorld	Pentagon	2DObs	Individual_Deep_Q	simple_mlp	0.2	0.05	0	2	-75	1000
InitialDNNSmall/159_53_0	none	none	False	0	False	GridWorld	Pentagon	2DObs	Individual_Deep_Q	simple_mlp	0.2	0.05	0	0	-100	1000
InitialDNNSmall/160_53_1	none	none	False	0	False	GridWorld	Pentagon	2DObs	Individual_Deep_Q	simple_mlp	0.2	0.05	0	1	-100	1000
InitialDNNSmall/161_53_2	none	none	False	0	False	GridWorld	Pentagon	2DObs	Individual_Deep_Q	simple_mlp	0.2	0.05	0	2	-100	1000
InitialDNNSmall/162_54_0	centralized	none	True	-10	False	GridWorld	Pentagon	2DObs	Individual_Deep_Q	simple_mlp	0.2	0.05	0.05	0	-30	1000
InitialDNNSmall/163_54_1	centralized	none	True	-10	False	GridWorld	Pentagon	2DObs	Individual_Deep_Q	simple_mlp	0.2	0.05	0.05	1	-30	1000
InitialDNNSmall/164_54_2	centralized	none	True	-10	False	GridWorld	Pentagon	2DObs	Individual_Deep_Q	simple_mlp	0.2	0.05	0.05	2	-30	1000
InitialDNNSmall/165_55_0	none	none	False	0	False	GridWorld	Pentagon	2DObs	Individual_Deep_Q	simple_mlp	0.2	0.05	0.05	0	0	1000
InitialDNNSmall/166_55_1	none	none	False	0	False	GridWorld	Pentagon	2DObs	Individual_Deep_Q	simple_mlp	0.2	0.05	0.05	1	0	1000
InitialDNNSmall/167_55_2	none	none	False	0	False	GridWorld	Pentagon	2DObs	Individual_Deep_Q	simple_mlp	0.2	0.05	0.05	2	0	1000
InitialDNNSmall/168_56_0	none	none	False	0	False	GridWorld	Pentagon	2DObs	Individual_Deep_Q	simple_mlp	0.2	0.05	0.05	0	-25	1000
InitialDNNSmall/169_56_1	none	none	False	0	False	GridWorld	Pentagon	2DObs	Individual_Deep_Q	simple_mlp	0.2	0.05	0.05	1	-25	1000
InitialDNNSmall/170_56_2	none	none	False	0	False	GridWorld	Pentagon	2DObs	Individual_Deep_Q	simple_mlp	0.2	0.05	0.05	2	-25	1000
InitialDNNSmall/171_57_0	none	none	False	0	False	GridWorld	Pentagon	2DObs	Individual_Deep_Q	simple_mlp	0.2	0.05	0.05	0	-50	1000
InitialDNNSmall/172_57_1	none	none	False	0	False	GridWorld	Pentagon	2DObs	Individual_Deep_Q	simple_mlp	0.2	0.05	0.05	1	-50	1000
InitialDNNSmall/173_57_2	none	none	False	0	False	GridWorld	Pentagon	2DObs	Individual_Deep_Q	simple_mlp	0.2	0.05	0.05	2	-50	1000
InitialDNNSmall/174_58_0	none	none	False	0	False	GridWorld	Pentagon	2DObs	Individual_Deep_Q	simple_mlp	0.2	0.05	0.05	0	-75	1000
InitialDNNSmall/175_58_1	none	none	False	0	False	GridWorld	Pentagon	2DObs	Individual_Deep_Q	simple_mlp	0.2	0.05	0.05	1	-75	1000
InitialDNNSmall/176_58_2	none	none	False	0	False	GridWorld	Pentagon	2DObs	Individual_Deep_Q	simple_mlp	0.2	0.05	0.05	2	-75	1000
InitialDNNSmall/177_59_0	none	none	False	0	False	GridWorld	Pentagon	2DObs	Individual_Deep_Q	simple_mlp	0.2	0.05	0.05	0	-100	1000
InitialDNNSmall/178_59_1	none	none	False	0	False	GridWorld	Pentagon	2DObs	Individual_Deep_Q	simple_mlp	0.2	0.05	0.05	1	-100	1000
InitialDNNSmall/179_59_2	none	none	False	0	False	GridWorld	Pentagon	2DObs	Individual_Deep_Q	simple_mlp	0.2	0.05	0.05	2	-100	1000
InitialDNNSmall/180_60_0	centralized	none	True	-10	False	GridWorld	ISR	2DObs	Individual_Deep_Q	simple_mlp	0.2	0.05	0	0	-30	1000
InitialDNNSmall/181_60_1	centralized	none	True	-10	False	GridWorld	ISR	2DObs	Individual_Deep_Q	simple_mlp	0.2	0.05	0	1	-30	1000
InitialDNNSmall/182_60_2	centralized	none	True	-10	False	GridWorld	ISR	2DObs	Individual_Deep_Q	simple_mlp	0.2	0.05	0	2	-30	1000
InitialDNNSmall/183_61_0	none	none	False	0	False	GridWorld	ISR	2DObs	Individual_Deep_Q	simple_mlp	0.2	0.05	0	0	0	1000
InitialDNNSmall/184_61_1	none	none	False	0	False	GridWorld	ISR	2DObs	Individual_Deep_Q	simple_mlp	0.2	0.05	0	1	0	1000
InitialDNNSmall/185_61_2	none	none	False	0	False	GridWorld	ISR	2DObs	Individual_Deep_Q	simple_mlp	0.2	0.05	0	2	0	1000
InitialDNNSmall/186_62_0	none	none	False	0	False	GridWorld	ISR	2DObs	Individual_Deep_Q	simple_mlp	0.2	0.05	0	0	-25	1000
InitialDNNSmall/187_62_1	none	none	False	0	False	GridWorld	ISR	2DObs	Individual_Deep_Q	simple_mlp	0.2	0.05	0	1	-25	1000
InitialDNNSmall/188_62_2	none	none	False	0	False	GridWorld	ISR	2DObs	Individual_Deep_Q	simple_mlp	0.2	0.05	0	2	-25	1000
InitialDNNSmall/189_63_0	none	none	False	0	False	GridWorld	ISR	2DObs	Individual_Deep_Q	simple_mlp	0.2	0.05	0	0	-50	1000
InitialDNNSmall/190_63_1	none	none	False	0	False	GridWorld	ISR	2DObs	Individual_Deep_Q	simple_mlp	0.2	0.05	0	1	-50	1000
InitialDNNSmall/191_63_2	none	none	False	0	False	GridWorld	ISR	2DObs	Individual_Deep_Q	simple_mlp	0.2	0.05	0	2	-50	1000
InitialDNNSmall/192_64_0	none	none	False	0	False	GridWorld	ISR	2DObs	Individual_Deep_Q	simple_mlp	0.2	0.05	0	0	-75	1000
InitialDNNSmall/193_64_1	none	none	False	0	False	GridWorld	ISR	2DObs	Individual_Deep_Q	simple_mlp	0.2	0.05	0	1	-75	1000
InitialDNNSmall/194_64_2	none	none	False	0	False	GridWorld	ISR	2DObs	Individual_Deep_Q	simple_mlp	0.2	0.05	0	2	-75	1000
InitialDNNSmall/195_65_0	none	none	False	0	False	GridWorld	ISR	2DObs	Individual_Deep_Q	simple_mlp	0.2	0.05	0	0	-100	1000
InitialDNNSmall/196_65_1	none	none	False	0	False	GridWorld	ISR	2DObs	Individual_Deep_Q	simple_mlp	0.2	0.05	0	1	-100	1000
InitialDNNSmall/197_65_2	none	none	False	0	False	GridWorld	ISR	2DObs	Individual_Deep_Q	simple_mlp	0.2	0.05	0	2	-100	1000
InitialDNNSmall/198_66_0	centralized	none	True	-10	False	GridWorld	ISR	2DObs	Individual_Deep_Q	simple_mlp	0.2	0.05	0.05	0	-30	1000
InitialDNNSmall/199_66_1	centralized	none	True	-10	False	GridWorld	ISR	2DObs	Individual_Deep_Q	simple_mlp	0.2	0.05	0.05	1	-30	1000
InitialDNNSmall/200_66_2	centralized	none	True	-10	False	GridWorld	ISR	2DObs	Individual_Deep_Q	simple_mlp	0.2	0.05	0.05	2	-30	1000
InitialDNNSmall/201_67_0	none	none	False	0	False	GridWorld	ISR	2DObs	Individual_Deep_Q	simple_mlp	0.2	0.05	0.05	0	0	1000
InitialDNNSmall/202_67_1	none	none	False	0	False	GridWorld	ISR	2DObs	Individual_Deep_Q	simple_mlp	0.2	0.05	0.05	1	0	1000
InitialDNNSmall/203_67_2	none	none	False	0	False	GridWorld	ISR	2DObs	Individual_Deep_Q	simple_mlp	0.2	0.05	0.05	2	0	1000
InitialDNNSmall/204_68_0	none	none	False	0	False	GridWorld	ISR	2DObs	Individual_Deep_Q	simple_mlp	0.2	0.05	0.05	0	-25	1000
InitialDNNSmall/205_68_1	none	none	False	0	False	GridWorld	ISR	2DObs	Individual_Deep_Q	simple_mlp	0.2	0.05	0.05	1	-25	1000
InitialDNNSmall/206_68_2	none	none	False	0	False	GridWorld	ISR	2DObs	Individual_Deep_Q	simple_mlp	0.2	0.05	0.05	2	-25	1000
InitialDNNSmall/207_69_0	none	none	False	0	False	GridWorld	ISR	2DObs	Individual_Deep_Q	simple_mlp	0.2	0.05	0.05	0	-50	1000
InitialDNNSmall/208_69_1	none	none	False	0	False	GridWorld	ISR	2DObs	Individual_Deep_Q	simple_mlp	0.2	0.05	0.05	1	-50	1000
InitialDNNSmall/209_69_2	none	none	False	0	False	GridWorld	ISR	2DObs	Individual_Deep_Q	simple_mlp	0.2	0.05	0.05	2	-50	1000
InitialDNNSmall/210_70_0	none	none	False	0	False	GridWorld	ISR	2DObs	Individual_Deep_Q	simple_mlp	0.2	0.05	0.05	0	-75	1000
InitialDNNSmall/211_70_1	none	none	False	0	False	GridWorld	ISR	2DObs	Individual_Deep_Q	simple_mlp	0.2	0.05	0.05	1	-75	1000
InitialDNNSmall/212_70_2	none	none	False	0	False	GridWorld	ISR	2DObs	Individual_Deep_Q	simple_mlp	0.2	0.05	0.05	2	-75	1000
InitialDNNSmall/213_71_0	none	none	False	0	False	GridWorld	ISR	2DObs	Individual_Deep_Q	simple_mlp	0.2	0.05	0.05	0	-100	1000
InitialDNNSmall/214_71_1	none	none	False	0	False	GridWorld	ISR	2DObs	Individual_Deep_Q	simple_mlp	0.2	0.05	0.05	1	-100	1000
InitialDNNSmall/215_71_2	none	none	False	0	False	GridWorld	ISR	2DObs	Individual_Deep_Q	simple_mlp	0.2	0.05	0.05	2	-100	1000
InitialDNNSmall/216_72_0	centralized	none	True	-10	False	GridWorld	SUNY	2DObs	Individual_Deep_Q	simple_mlp	0.2	0.05	0	0	-30	1000
InitialDNNSmall/217_72_1	centralized	none	True	-10	False	GridWorld	SUNY	2DObs	Individual_Deep_Q	simple_mlp	0.2	0.05	0	1	-30	1000
InitialDNNSmall/218_72_2	centralized	none	True	-10	False	GridWorld	SUNY	2DObs	Individual_Deep_Q	simple_mlp	0.2	0.05	0	2	-30	1000
InitialDNNSmall/219_73_0	none	none	False	0	False	GridWorld	SUNY	2DObs	Individual_Deep_Q	simple_mlp	0.2	0.05	0	0	0	1000
InitialDNNSmall/220_73_1	none	none	False	0	False	GridWorld	SUNY	2DObs	Individual_Deep_Q	simple_mlp	0.2	0.05	0	1	0	1000
InitialDNNSmall/221_73_2	none	none	False	0	False	GridWorld	SUNY	2DObs	Individual_Deep_Q	simple_mlp	0.2	0.05	0	2	0	1000
InitialDNNSmall/222_74_0	none	none	False	0	False	GridWorld	SUNY	2DObs	Individual_Deep_Q	simple_mlp	0.2	0.05	0	0	-25	1000
InitialDNNSmall/223_74_1	none	none	False	0	False	GridWorld	SUNY	2DObs	Individual_Deep_Q	simple_mlp	0.2	0.05	0	1	-25	1000
InitialDNNSmall/224_74_2	none	none	False	0	False	GridWorld	SUNY	2DObs	Individual_Deep_Q	simple_mlp	0.2	0.05	0	2	-25	1000
InitialDNNSmall/225_75_0	none	none	False	0	False	GridWorld	SUNY	2DObs	Individual_Deep_Q	simple_mlp	0.2	0.05	0	0	-50	1000
InitialDNNSmall/226_75_1	none	none	False	0	False	GridWorld	SUNY	2DObs	Individual_Deep_Q	simple_mlp	0.2	0.05	0	1	-50	1000
InitialDNNSmall/227_75_2	none	none	False	0	False	GridWorld	SUNY	2DObs	Individual_Deep_Q	simple_mlp	0.2	0.05	0	2	-50	1000
InitialDNNSmall/228_76_0	none	none	False	0	False	GridWorld	SUNY	2DObs	Individual_Deep_Q	simple_mlp	0.2	0.05	0	0	-75	1000
InitialDNNSmall/229_76_1	none	none	False	0	False	GridWorld	SUNY	2DObs	Individual_Deep_Q	simple_mlp	0.2	0.05	0	1	-75	1000
InitialDNNSmall/230_76_2	none	none	False	0	False	GridWorld	SUNY	2DObs	Individual_Deep_Q	simple_mlp	0.2	0.05	0	2	-75	1000
InitialDNNSmall/231_77_0	none	none	False	0	False	GridWorld	SUNY	2DObs	Individual_Deep_Q	simple_mlp	0.2	0.05	0	0	-100	1000
InitialDNNSmall/232_77_1	none	none	False	0	False	GridWorld	SUNY	2DObs	Individual_Deep_Q	simple_mlp	0.2	0.05	0	1	-100	1000
InitialDNNSmall/233_77_2	none	none	False	0	False	GridWorld	SUNY	2DObs	Individual_Deep_Q	simple_mlp	0.2	0.05	0	2	-100	1000
InitialDNNSmall/234_78_0	centralized	none	True	-10	False	GridWorld	SUNY	2DObs	Individual_Deep_Q	simple_mlp	0.2	0.05	0.05	0	-30	1000
InitialDNNSmall/235_78_1	centralized	none	True	-10	False	GridWorld	SUNY	2DObs	Individual_Deep_Q	simple_mlp	0.2	0.05	0.05	1	-30	1000
InitialDNNSmall/236_78_2	centralized	none	True	-10	False	GridWorld	SUNY	2DObs	Individual_Deep_Q	simple_mlp	0.2	0.05	0.05	2	-30	1000
InitialDNNSmall/237_79_0	none	none	False	0	False	GridWorld	SUNY	2DObs	Individual_Deep_Q	simple_mlp	0.2	0.05	0.05	0	0	1000
InitialDNNSmall/238_79_1	none	none	False	0	False	GridWorld	SUNY	2DObs	Individual_Deep_Q	simple_mlp	0.2	0.05	0.05	1	0	1000
InitialDNNSmall/239_79_2	none	none	False	0	False	GridWorld	SUNY	2DObs	Individual_Deep_Q	simple_mlp	0.2	0.05	0.05	2	0	1000
InitialDNNSmall/240_80_0	none	none	False	0	False	GridWorld	SUNY	2DObs	Individual_Deep_Q	simple_mlp	0.2	0.05	0.05	0	-25	1000
InitialDNNSmall/241_80_1	none	none	False	0	False	GridWorld	SUNY	2DObs	Individual_Deep_Q	simple_mlp	0.2	0.05	0.05	1	-25	1000
InitialDNNSmall/242_80_2	none	none	False	0	False	GridWorld	SUNY	2DObs	Individual_Deep_Q	simple_mlp	0.2	0.05	0.05	2	-25	1000
InitialDNNSmall/243_81_0	none	none	False	0	False	GridWorld	SUNY	2DObs	Individual_Deep_Q	simple_mlp	0.2	0.05	0.05	0	-50	1000
InitialDNNSmall/244_81_1	none	none	False	0	False	GridWorld	SUNY	2DObs	Individual_Deep_Q	simple_mlp	0.2	0.05	0.05	1	-50	1000
InitialDNNSmall/245_81_2	none	none	False	0	False	GridWorld	SUNY	2DObs	Individual_Deep_Q	simple_mlp	0.2	0.05	0.05	2	-50	1000
InitialDNNSmall/246_82_0	none	none	False	0	False	GridWorld	SUNY	2DObs	Individual_Deep_Q	simple_mlp	0.2	0.05	0.05	0	-75	1000
InitialDNNSmall/247_82_1	none	none	False	0	False	GridWorld	SUNY	2DObs	Individual_Deep_Q	simple_mlp	0.2	0.05	0.05	1	-75	1000
InitialDNNSmall/248_82_2	none	none	False	0	False	GridWorld	SUNY	2DObs	Individual_Deep_Q	simple_mlp	0.2	0.05	0.05	2	-75	1000
InitialDNNSmall/249_83_0	none	none	False	0	False	GridWorld	SUNY	2DObs	Individual_Deep_Q	simple_mlp	0.2	0.05	0.05	0	-100	1000
InitialDNNSmall/250_83_1	none	none	False	0	False	GridWorld	SUNY	2DObs	Individual_Deep_Q	simple_mlp	0.2	0.05	0.05	1	-100	1000
InitialDNNSmall/251_83_2	none	none	False	0	False	GridWorld	SUNY	2DObs	Individual_Deep_Q	simple_mlp	0.2	0.05	0.05	2	-100	1000
InitialDNNSmall/252_84_0	centralized	none	True	-10	False	GridWorld	MIT	2DObs	Individual_Deep_Q	simple_mlp	0.2	0.05	0	0	-30	1000
InitialDNNSmall/253_84_1	centralized	none	True	-10	False	GridWorld	MIT	2DObs	Individual_Deep_Q	simple_mlp	0.2	0.05	0	1	-30	1000
InitialDNNSmall/254_84_2	centralized	none	True	-10	False	GridWorld	MIT	2DObs	Individual_Deep_Q	simple_mlp	0.2	0.05	0	2	-30	1000
InitialDNNSmall/255_85_0	none	none	False	0	False	GridWorld	MIT	2DObs	Individual_Deep_Q	simple_mlp	0.2	0.05	0	0	0	1000
InitialDNNSmall/256_85_1	none	none	False	0	False	GridWorld	MIT	2DObs	Individual_Deep_Q	simple_mlp	0.2	0.05	0	1	0	1000
InitialDNNSmall/257_85_2	none	none	False	0	False	GridWorld	MIT	2DObs	Individual_Deep_Q	simple_mlp	0.2	0.05	0	2	0	1000
InitialDNNSmall/258_86_0	none	none	False	0	False	GridWorld	MIT	2DObs	Individual_Deep_Q	simple_mlp	0.2	0.05	0	0	-25	1000
InitialDNNSmall/259_86_1	none	none	False	0	False	GridWorld	MIT	2DObs	Individual_Deep_Q	simple_mlp	0.2	0.05	0	1	-25	1000
InitialDNNSmall/260_86_2	none	none	False	0	False	GridWorld	MIT	2DObs	Individual_Deep_Q	simple_mlp	0.2	0.05	0	2	-25	1000
InitialDNNSmall/261_87_0	none	none	False	0	False	GridWorld	MIT	2DObs	Individual_Deep_Q	simple_mlp	0.2	0.05	0	0	-50	1000
InitialDNNSmall/262_87_1	none	none	False	0	False	GridWorld	MIT	2DObs	Individual_Deep_Q	simple_mlp	0.2	0.05	0	1	-50	1000
InitialDNNSmall/263_87_2	none	none	False	0	False	GridWorld	MIT	2DObs	Individual_Deep_Q	simple_mlp	0.2	0.05	0	2	-50	1000
InitialDNNSmall/264_88_0	none	none	False	0	False	GridWorld	MIT	2DObs	Individual_Deep_Q	simple_mlp	0.2	0.05	0	0	-75	1000
InitialDNNSmall/265_88_1	none	none	False	0	False	GridWorld	MIT	2DObs	Individual_Deep_Q	simple_mlp	0.2	0.05	0	1	-75	1000
InitialDNNSmall/266_88_2	none	none	False	0	False	GridWorld	MIT	2DObs	Individual_Deep_Q	simple_mlp	0.2	0.05	0	2	-75	1000
InitialDNNSmall/267_89_0	none	none	False	0	False	GridWorld	MIT	2DObs	Individual_Deep_Q	simple_mlp	0.2	0.05	0	0	-100	1000
InitialDNNSmall/268_89_1	none	none	False	0	False	GridWorld	MIT	2DObs	Individual_Deep_Q	simple_mlp	0.2	0.05	0	1	-100	1000
InitialDNNSmall/269_89_2	none	none	False	0	False	GridWorld	MIT	2DObs	Individual_Deep_Q	simple_mlp	0.2	0.05	0	2	-100	1000
InitialDNNSmall/270_90_0	centralized	none	True	-10	False	GridWorld	MIT	2DObs	Individual_Deep_Q	simple_mlp	0.2	0.05	0.05	0	-30	1000
InitialDNNSmall/271_90_1	centralized	none	True	-10	False	GridWorld	MIT	2DObs	Individual_Deep_Q	simple_mlp	0.2	0.05	0.05	1	-30	1000
InitialDNNSmall/272_90_2	centralized	none	True	-10	False	GridWorld	MIT	2DObs	Individual_Deep_Q	simple_mlp	0.2	0.05	0.05	2	-30	1000
InitialDNNSmall/273_91_0	none	none	False	0	False	GridWorld	MIT	2DObs	Individual_Deep_Q	simple_mlp	0.2	0.05	0.05	0	0	1000
InitialDNNSmall/274_91_1	none	none	False	0	False	GridWorld	MIT	2DObs	Individual_Deep_Q	simple_mlp	0.2	0.05	0.05	1	0	1000
InitialDNNSmall/275_91_2	none	none	False	0	False	GridWorld	MIT	2DObs	Individual_Deep_Q	simple_mlp	0.2	0.05	0.05	2	0	1000
InitialDNNSmall/276_92_0	none	none	False	0	False	GridWorld	MIT	2DObs	Individual_Deep_Q	simple_mlp	0.2	0.05	0.05	0	-25	1000
InitialDNNSmall/277_92_1	none	none	False	0	False	GridWorld	MIT	2DObs	Individual_Deep_Q	simple_mlp	0.2	0.05	0.05	1	-25	1000
InitialDNNSmall/278_92_2	none	none	False	0	False	GridWorld	MIT	2DObs	Individual_Deep_Q	simple_mlp	0.2	0.05	0.05	2	-25	1000
InitialDNNSmall/279_93_0	none	none	False	0	False	GridWorld	MIT	2DObs	Individual_Deep_Q	simple_mlp	0.2	0.05	0.05	0	-50	1000
InitialDNNSmall/280_93_1	none	none	False	0	False	GridWorld	MIT	2DObs	Individual_Deep_Q	simple_mlp	0.2	0.05	0.05	1	-50	1000
InitialDNNSmall/281_93_2	none	none	False	0	False	GridWorld	MIT	2DObs	Individual_Deep_Q	simple_mlp	0.2	0.05	0.05	2	-50	1000
InitialDNNSmall/282_94_0	none	none	False	0	False	GridWorld	MIT	2DObs	Individual_Deep_Q	simple_mlp	0.2	0.05	0.05	0	-75	1000
InitialDNNSmall/283_94_1	none	none	False	0	False	GridWorld	MIT	2DObs	Individual_Deep_Q	simple_mlp	0.2	0.05	0.05	1	-75	1000
InitialDNNSmall/284_94_2	none	none	False	0	False	GridWorld	MIT	2DObs	Individual_Deep_Q	simple_mlp	0.2	0.05	0.05	2	-75	1000
InitialDNNSmall/285_95_0	none	none	False	0	False	GridWorld	MIT	2DObs	Individual_Deep_Q	simple_mlp	0.2	0.05	0.05	0	-100	1000
InitialDNNSmall/286_95_1	none	none	False	0	False	GridWorld	MIT	2DObs	Individual_Deep_Q	simple_mlp	0.2	0.05	0.05	1	-100	1000
InitialDNNSmall/287_95_2	none	none	False	0	False	GridWorld	MIT	2DObs	Individual_Deep_Q	simple_mlp	0.2	0.05	0.05	2	-100	1000
