# Supplementary material
Source: ML conference proceedings conference paper supplement (https://proceedings.neurips.cc/paper_files/paper/2022/hash/57444e14ecd9e2c8f603b4f012ce3811-Abstract.html)
Supplement: Supplementary file 1 [file 57444e14ecd9e2c8f603b4f012ce3811-Supplemental-Conference.zip › 3410_shield_decentralization_for_sa-Supplementary Material/parallel_configs/ReplicateIngyFigure9-2.csv]

run_name	shield	punish_unsafe_orig_action	punish_unsafe_orig_action_modifier	randomize_starts	map_type	grid_world_map_name	grid_world_obs_type	learner_type	learner_anneal_eps_start	learner_anneal_eps_finish	learner_evaluation_epsilon	seed	grid_world_collision_penalty	max_num_episodes
ReplicateIngyFigure9-2/0_0_0	none	False	0	False	GridWorld	Pentagon	FullObsDiscrete	Individual_Q	0.2	0.05	0.05	0	0	1000
ReplicateIngyFigure9-2/1_0_1	none	False	0	False	GridWorld	Pentagon	FullObsDiscrete	Individual_Q	0.2	0.05	0.05	1	0	1000
ReplicateIngyFigure9-2/2_0_2	none	False	0	False	GridWorld	Pentagon	FullObsDiscrete	Individual_Q	0.2	0.05	0.05	2	0	1000
ReplicateIngyFigure9-2/3_0_3	none	False	0	False	GridWorld	Pentagon	FullObsDiscrete	Individual_Q	0.2	0.05	0.05	3	0	1000
ReplicateIngyFigure9-2/4_0_4	none	False	0	False	GridWorld	Pentagon	FullObsDiscrete	Individual_Q	0.2	0.05	0.05	4	0	1000
ReplicateIngyFigure9-2/5_0_5	none	False	0	False	GridWorld	Pentagon	FullObsDiscrete	Individual_Q	0.2	0.05	0.05	5	0	1000
ReplicateIngyFigure9-2/6_0_6	none	False	0	False	GridWorld	Pentagon	FullObsDiscrete	Individual_Q	0.2	0.05	0.05	6	0	1000
ReplicateIngyFigure9-2/7_0_7	none	False	0	False	GridWorld	Pentagon	FullObsDiscrete	Individual_Q	0.2	0.05	0.05	7	0	1000
ReplicateIngyFigure9-2/8_0_8	none	False	0	False	GridWorld	Pentagon	FullObsDiscrete	Individual_Q	0.2	0.05	0.05	8	0	1000
ReplicateIngyFigure9-2/9_0_9	none	False	0	False	GridWorld	Pentagon	FullObsDiscrete	Individual_Q	0.2	0.05	0.05	9	0	1000
ReplicateIngyFigure9-2/10_1_0	none	False	0	False	GridWorld	Pentagon	FullObsDiscrete	Individual_Q	0.2	0.05	0.05	0	-25	1000
ReplicateIngyFigure9-2/11_1_1	none	False	0	False	GridWorld	Pentagon	FullObsDiscrete	Individual_Q	0.2	0.05	0.05	1	-25	1000
ReplicateIngyFigure9-2/12_1_2	none	False	0	False	GridWorld	Pentagon	FullObsDiscrete	Individual_Q	0.2	0.05	0.05	2	-25	1000
ReplicateIngyFigure9-2/13_1_3	none	False	0	False	GridWorld	Pentagon	FullObsDiscrete	Individual_Q	0.2	0.05	0.05	3	-25	1000
ReplicateIngyFigure9-2/14_1_4	none	False	0	False	GridWorld	Pentagon	FullObsDiscrete	Individual_Q	0.2	0.05	0.05	4	-25	1000
ReplicateIngyFigure9-2/15_1_5	none	False	0	False	GridWorld	Pentagon	FullObsDiscrete	Individual_Q	0.2	0.05	0.05	5	-25	1000
ReplicateIngyFigure9-2/16_1_6	none	False	0	False	GridWorld	Pentagon	FullObsDiscrete	Individual_Q	0.2	0.05	0.05	6	-25	1000
ReplicateIngyFigure9-2/17_1_7	none	False	0	False	GridWorld	Pentagon	FullObsDiscrete	Individual_Q	0.2	0.05	0.05	7	-25	1000
ReplicateIngyFigure9-2/18_1_8	none	False	0	False	GridWorld	Pentagon	FullObsDiscrete	Individual_Q	0.2	0.05	0.05	8	-25	1000
ReplicateIngyFigure9-2/19_1_9	none	False	0	False	GridWorld	Pentagon	FullObsDiscrete	Individual_Q	0.2	0.05	0.05	9	-25	1000
ReplicateIngyFigure9-2/20_2_0	none	False	0	False	GridWorld	Pentagon	FullObsDiscrete	Individual_Q	0.2	0.05	0.05	0	-50	1000
ReplicateIngyFigure9-2/21_2_1	none	False	0	False	GridWorld	Pentagon	FullObsDiscrete	Individual_Q	0.2	0.05	0.05	1	-50	1000
ReplicateIngyFigure9-2/22_2_2	none	False	0	False	GridWorld	Pentagon	FullObsDiscrete	Individual_Q	0.2	0.05	0.05	2	-50	1000
ReplicateIngyFigure9-2/23_2_3	none	False	0	False	GridWorld	Pentagon	FullObsDiscrete	Individual_Q	0.2	0.05	0.05	3	-50	1000
ReplicateIngyFigure9-2/24_2_4	none	False	0	False	GridWorld	Pentagon	FullObsDiscrete	Individual_Q	0.2	0.05	0.05	4	-50	1000
ReplicateIngyFigure9-2/25_2_5	none	False	0	False	GridWorld	Pentagon	FullObsDiscrete	Individual_Q	0.2	0.05	0.05	5	-50	1000
ReplicateIngyFigure9-2/26_2_6	none	False	0	False	GridWorld	Pentagon	FullObsDiscrete	Individual_Q	0.2	0.05	0.05	6	-50	1000
ReplicateIngyFigure9-2/27_2_7	none	False	0	False	GridWorld	Pentagon	FullObsDiscrete	Individual_Q	0.2	0.05	0.05	7	-50	1000
ReplicateIngyFigure9-2/28_2_8	none	False	0	False	GridWorld	Pentagon	FullObsDiscrete	Individual_Q	0.2	0.05	0.05	8	-50	1000
ReplicateIngyFigure9-2/29_2_9	none	False	0	False	GridWorld	Pentagon	FullObsDiscrete	Individual_Q	0.2	0.05	0.05	9	-50	1000
ReplicateIngyFigure9-2/30_3_0	none	False	0	False	GridWorld	Pentagon	FullObsDiscrete	Individual_Q	0.2	0.05	0.05	0	-75	1000
ReplicateIngyFigure9-2/31_3_1	none	False	0	False	GridWorld	Pentagon	FullObsDiscrete	Individual_Q	0.2	0.05	0.05	1	-75	1000
ReplicateIngyFigure9-2/32_3_2	none	False	0	False	GridWorld	Pentagon	FullObsDiscrete	Individual_Q	0.2	0.05	0.05	2	-75	1000
ReplicateIngyFigure9-2/33_3_3	none	False	0	False	GridWorld	Pentagon	FullObsDiscrete	Individual_Q	0.2	0.05	0.05	3	-75	1000
ReplicateIngyFigure9-2/34_3_4	none	False	0	False	GridWorld	Pentagon	FullObsDiscrete	Individual_Q	0.2	0.05	0.05	4	-75	1000
ReplicateIngyFigure9-2/35_3_5	none	False	0	False	GridWorld	Pentagon	FullObsDiscrete	Individual_Q	0.2	0.05	0.05	5	-75	1000
ReplicateIngyFigure9-2/36_3_6	none	False	0	False	GridWorld	Pentagon	FullObsDiscrete	Individual_Q	0.2	0.05	0.05	6	-75	1000
ReplicateIngyFigure9-2/37_3_7	none	False	0	False	GridWorld	Pentagon	FullObsDiscrete	Individual_Q	0.2	0.05	0.05	7	-75	1000
ReplicateIngyFigure9-2/38_3_8	none	False	0	False	GridWorld	Pentagon	FullObsDiscrete	Individual_Q	0.2	0.05	0.05	8	-75	1000
ReplicateIngyFigure9-2/39_3_9	none	False	0	False	GridWorld	Pentagon	FullObsDiscrete	Individual_Q	0.2	0.05	0.05	9	-75	1000
ReplicateIngyFigure9-2/40_4_0	none	False	0	False	GridWorld	Pentagon	FullObsDiscrete	Individual_Q	0.2	0.05	0.05	0	-100	1000
ReplicateIngyFigure9-2/41_4_1	none	False	0	False	GridWorld	Pentagon	FullObsDiscrete	Individual_Q	0.2	0.05	0.05	1	-100	1000
ReplicateIngyFigure9-2/42_4_2	none	False	0	False	GridWorld	Pentagon	FullObsDiscrete	Individual_Q	0.2	0.05	0.05	2	-100	1000
ReplicateIngyFigure9-2/43_4_3	none	False	0	False	GridWorld	Pentagon	FullObsDiscrete	Individual_Q	0.2	0.05	0.05	3	-100	1000
ReplicateIngyFigure9-2/44_4_4	none	False	0	False	GridWorld	Pentagon	FullObsDiscrete	Individual_Q	0.2	0.05	0.05	4	-100	1000
ReplicateIngyFigure9-2/45_4_5	none	False	0	False	GridWorld	Pentagon	FullObsDiscrete	Individual_Q	0.2	0.05	0.05	5	-100	1000
ReplicateIngyFigure9-2/46_4_6	none	False	0	False	GridWorld	Pentagon	FullObsDiscrete	Individual_Q	0.2	0.05	0.05	6	-100	1000
ReplicateIngyFigure9-2/47_4_7	none	False	0	False	GridWorld	Pentagon	FullObsDiscrete	Individual_Q	0.2	0.05	0.05	7	-100	1000
ReplicateIngyFigure9-2/48_4_8	none	False	0	False	GridWorld	Pentagon	FullObsDiscrete	Individual_Q	0.2	0.05	0.05	8	-100	1000
ReplicateIngyFigure9-2/49_4_9	none	False	0	False	GridWorld	Pentagon	FullObsDiscrete	Individual_Q	0.2	0.05	0.05	9	-100	1000
ReplicateIngyFigure9-2/50_5_0	none	False	0	False	GridWorld	ISR	FullObsDiscrete	Individual_Q	0.2	0.05	0.05	0	0	1000
ReplicateIngyFigure9-2/51_5_1	none	False	0	False	GridWorld	ISR	FullObsDiscrete	Individual_Q	0.2	0.05	0.05	1	0	1000
ReplicateIngyFigure9-2/52_5_2	none	False	0	False	GridWorld	ISR	FullObsDiscrete	Individual_Q	0.2	0.05	0.05	2	0	1000
ReplicateIngyFigure9-2/53_5_3	none	False	0	False	GridWorld	ISR	FullObsDiscrete	Individual_Q	0.2	0.05	0.05	3	0	1000
ReplicateIngyFigure9-2/54_5_4	none	False	0	False	GridWorld	ISR	FullObsDiscrete	Individual_Q	0.2	0.05	0.05	4	0	1000
ReplicateIngyFigure9-2/55_5_5	none	False	0	False	GridWorld	ISR	FullObsDiscrete	Individual_Q	0.2	0.05	0.05	5	0	1000
ReplicateIngyFigure9-2/56_5_6	none	False	0	False	GridWorld	ISR	FullObsDiscrete	Individual_Q	0.2	0.05	0.05	6	0	1000
ReplicateIngyFigure9-2/57_5_7	none	False	0	False	GridWorld	ISR	FullObsDiscrete	Individual_Q	0.2	0.05	0.05	7	0	1000
ReplicateIngyFigure9-2/58_5_8	none	False	0	False	GridWorld	ISR	FullObsDiscrete	Individual_Q	0.2	0.05	0.05	8	0	1000
ReplicateIngyFigure9-2/59_5_9	none	False	0	False	GridWorld	ISR	FullObsDiscrete	Individual_Q	0.2	0.05	0.05	9	0	1000
ReplicateIngyFigure9-2/60_6_0	none	False	0	False	GridWorld	ISR	FullObsDiscrete	Individual_Q	0.2	0.05	0.05	0	-25	1000
ReplicateIngyFigure9-2/61_6_1	none	False	0	False	GridWorld	ISR	FullObsDiscrete	Individual_Q	0.2	0.05	0.05	1	-25	1000
ReplicateIngyFigure9-2/62_6_2	none	False	0	False	GridWorld	ISR	FullObsDiscrete	Individual_Q	0.2	0.05	0.05	2	-25	1000
ReplicateIngyFigure9-2/63_6_3	none	False	0	False	GridWorld	ISR	FullObsDiscrete	Individual_Q	0.2	0.05	0.05	3	-25	1000
ReplicateIngyFigure9-2/64_6_4	none	False	0	False	GridWorld	ISR	FullObsDiscrete	Individual_Q	0.2	0.05	0.05	4	-25	1000
ReplicateIngyFigure9-2/65_6_5	none	False	0	False	GridWorld	ISR	FullObsDiscrete	Individual_Q	0.2	0.05	0.05	5	-25	1000
ReplicateIngyFigure9-2/66_6_6	none	False	0	False	GridWorld	ISR	FullObsDiscrete	Individual_Q	0.2	0.05	0.05	6	-25	1000
ReplicateIngyFigure9-2/67_6_7	none	False	0	False	GridWorld	ISR	FullObsDiscrete	Individual_Q	0.2	0.05	0.05	7	-25	1000
ReplicateIngyFigure9-2/68_6_8	none	False	0	False	GridWorld	ISR	FullObsDiscrete	Individual_Q	0.2	0.05	0.05	8	-25	1000
ReplicateIngyFigure9-2/69_6_9	none	False	0	False	GridWorld	ISR	FullObsDiscrete	Individual_Q	0.2	0.05	0.05	9	-25	1000
ReplicateIngyFigure9-2/70_7_0	none	False	0	False	GridWorld	ISR	FullObsDiscrete	Individual_Q	0.2	0.05	0.05	0	-50	1000
ReplicateIngyFigure9-2/71_7_1	none	False	0	False	GridWorld	ISR	FullObsDiscrete	Individual_Q	0.2	0.05	0.05	1	-50	1000
ReplicateIngyFigure9-2/72_7_2	none	False	0	False	GridWorld	ISR	FullObsDiscrete	Individual_Q	0.2	0.05	0.05	2	-50	1000
ReplicateIngyFigure9-2/73_7_3	none	False	0	False	GridWorld	ISR	FullObsDiscrete	Individual_Q	0.2	0.05	0.05	3	-50	1000
ReplicateIngyFigure9-2/74_7_4	none	False	0	False	GridWorld	ISR	FullObsDiscrete	Individual_Q	0.2	0.05	0.05	4	-50	1000
ReplicateIngyFigure9-2/75_7_5	none	False	0	False	GridWorld	ISR	FullObsDiscrete	Individual_Q	0.2	0.05	0.05	5	-50	1000
ReplicateIngyFigure9-2/76_7_6	none	False	0	False	GridWorld	ISR	FullObsDiscrete	Individual_Q	0.2	0.05	0.05	6	-50	1000
ReplicateIngyFigure9-2/77_7_7	none	False	0	False	GridWorld	ISR	FullObsDiscrete	Individual_Q	0.2	0.05	0.05	7	-50	1000
ReplicateIngyFigure9-2/78_7_8	none	False	0	False	GridWorld	ISR	FullObsDiscrete	Individual_Q	0.2	0.05	0.05	8	-50	1000
ReplicateIngyFigure9-2/79_7_9	none	False	0	False	GridWorld	ISR	FullObsDiscrete	Individual_Q	0.2	0.05	0.05	9	-50	1000
ReplicateIngyFigure9-2/80_8_0	none	False	0	False	GridWorld	ISR	FullObsDiscrete	Individual_Q	0.2	0.05	0.05	0	-75	1000
ReplicateIngyFigure9-2/81_8_1	none	False	0	False	GridWorld	ISR	FullObsDiscrete	Individual_Q	0.2	0.05	0.05	1	-75	1000
ReplicateIngyFigure9-2/82_8_2	none	False	0	False	GridWorld	ISR	FullObsDiscrete	Individual_Q	0.2	0.05	0.05	2	-75	1000
ReplicateIngyFigure9-2/83_8_3	none	False	0	False	GridWorld	ISR	FullObsDiscrete	Individual_Q	0.2	0.05	0.05	3	-75	1000
ReplicateIngyFigure9-2/84_8_4	none	False	0	False	GridWorld	ISR	FullObsDiscrete	Individual_Q	0.2	0.05	0.05	4	-75	1000
ReplicateIngyFigure9-2/85_8_5	none	False	0	False	GridWorld	ISR	FullObsDiscrete	Individual_Q	0.2	0.05	0.05	5	-75	1000
ReplicateIngyFigure9-2/86_8_6	none	False	0	False	GridWorld	ISR	FullObsDiscrete	Individual_Q	0.2	0.05	0.05	6	-75	1000
ReplicateIngyFigure9-2/87_8_7	none	False	0	False	GridWorld	ISR	FullObsDiscrete	Individual_Q	0.2	0.05	0.05	7	-75	1000
ReplicateIngyFigure9-2/88_8_8	none	False	0	False	GridWorld	ISR	FullObsDiscrete	Individual_Q	0.2	0.05	0.05	8	-75	1000
ReplicateIngyFigure9-2/89_8_9	none	False	0	False	GridWorld	ISR	FullObsDiscrete	Individual_Q	0.2	0.05	0.05	9	-75	1000
ReplicateIngyFigure9-2/90_9_0	none	False	0	False	GridWorld	ISR	FullObsDiscrete	Individual_Q	0.2	0.05	0.05	0	-100	1000
ReplicateIngyFigure9-2/91_9_1	none	False	0	False	GridWorld	ISR	FullObsDiscrete	Individual_Q	0.2	0.05	0.05	1	-100	1000
ReplicateIngyFigure9-2/92_9_2	none	False	0	False	GridWorld	ISR	FullObsDiscrete	Individual_Q	0.2	0.05	0.05	2	-100	1000
ReplicateIngyFigure9-2/93_9_3	none	False	0	False	GridWorld	ISR	FullObsDiscrete	Individual_Q	0.2	0.05	0.05	3	-100	1000
ReplicateIngyFigure9-2/94_9_4	none	False	0	False	GridWorld	ISR	FullObsDiscrete	Individual_Q	0.2	0.05	0.05	4	-100	1000
ReplicateIngyFigure9-2/95_9_5	none	False	0	False	GridWorld	ISR	FullObsDiscrete	Individual_Q	0.2	0.05	0.05	5	-100	1000
ReplicateIngyFigure9-2/96_9_6	none	False	0	False	GridWorld	ISR	FullObsDiscrete	Individual_Q	0.2	0.05	0.05	6	-100	1000
ReplicateIngyFigure9-2/97_9_7	none	False	0	False	GridWorld	ISR	FullObsDiscrete	Individual_Q	0.2	0.05	0.05	7	-100	1000
ReplicateIngyFigure9-2/98_9_8	none	False	0	False	GridWorld	ISR	FullObsDiscrete	Individual_Q	0.2	0.05	0.05	8	-100	1000
ReplicateIngyFigure9-2/99_9_9	none	False	0	False	GridWorld	ISR	FullObsDiscrete	Individual_Q	0.2	0.05	0.05	9	-100	1000
ReplicateIngyFigure9-2/100_10_0	none	False	0	False	GridWorld	SUNY	FullObsDiscrete	Individual_Q	0.2	0.05	0.05	0	0	1000
ReplicateIngyFigure9-2/101_10_1	none	False	0	False	GridWorld	SUNY	FullObsDiscrete	Individual_Q	0.2	0.05	0.05	1	0	1000
ReplicateIngyFigure9-2/102_10_2	none	False	0	False	GridWorld	SUNY	FullObsDiscrete	Individual_Q	0.2	0.05	0.05	2	0	1000
ReplicateIngyFigure9-2/103_10_3	none	False	0	False	GridWorld	SUNY	FullObsDiscrete	Individual_Q	0.2	0.05	0.05	3	0	1000
ReplicateIngyFigure9-2/104_10_4	none	False	0	False	GridWorld	SUNY	FullObsDiscrete	Individual_Q	0.2	0.05	0.05	4	0	1000
ReplicateIngyFigure9-2/105_10_5	none	False	0	False	GridWorld	SUNY	FullObsDiscrete	Individual_Q	0.2	0.05	0.05	5	0	1000
ReplicateIngyFigure9-2/106_10_6	none	False	0	False	GridWorld	SUNY	FullObsDiscrete	Individual_Q	0.2	0.05	0.05	6	0	1000
ReplicateIngyFigure9-2/107_10_7	none	False	0	False	GridWorld	SUNY	FullObsDiscrete	Individual_Q	0.2	0.05	0.05	7	0	1000
ReplicateIngyFigure9-2/108_10_8	none	False	0	False	GridWorld	SUNY	FullObsDiscrete	Individual_Q	0.2	0.05	0.05	8	0	1000
ReplicateIngyFigure9-2/109_10_9	none	False	0	False	GridWorld	SUNY	FullObsDiscrete	Individual_Q	0.2	0.05	0.05	9	0	1000
ReplicateIngyFigure9-2/110_11_0	none	False	0	False	GridWorld	SUNY	FullObsDiscrete	Individual_Q	0.2	0.05	0.05	0	-25	1000
ReplicateIngyFigure9-2/111_11_1	none	False	0	False	GridWorld	SUNY	FullObsDiscrete	Individual_Q	0.2	0.05	0.05	1	-25	1000
ReplicateIngyFigure9-2/112_11_2	none	False	0	False	GridWorld	SUNY	FullObsDiscrete	Individual_Q	0.2	0.05	0.05	2	-25	1000
ReplicateIngyFigure9-2/113_11_3	none	False	0	False	GridWorld	SUNY	FullObsDiscrete	Individual_Q	0.2	0.05	0.05	3	-25	1000
ReplicateIngyFigure9-2/114_11_4	none	False	0	False	GridWorld	SUNY	FullObsDiscrete	Individual_Q	0.2	0.05	0.05	4	-25	1000
ReplicateIngyFigure9-2/115_11_5	none	False	0	False	GridWorld	SUNY	FullObsDiscrete	Individual_Q	0.2	0.05	0.05	5	-25	1000
ReplicateIngyFigure9-2/116_11_6	none	False	0	False	GridWorld	SUNY	FullObsDiscrete	Individual_Q	0.2	0.05	0.05	6	-25	1000
ReplicateIngyFigure9-2/117_11_7	none	False	0	False	GridWorld	SUNY	FullObsDiscrete	Individual_Q	0.2	0.05	0.05	7	-25	1000
ReplicateIngyFigure9-2/118_11_8	none	False	0	False	GridWorld	SUNY	FullObsDiscrete	Individual_Q	0.2	0.05	0.05	8	-25	1000
ReplicateIngyFigure9-2/119_11_9	none	False	0	False	GridWorld	SUNY	FullObsDiscrete	Individual_Q	0.2	0.05	0.05	9	-25	1000
ReplicateIngyFigure9-2/120_12_0	none	False	0	False	GridWorld	SUNY	FullObsDiscrete	Individual_Q	0.2	0.05	0.05	0	-50	1000
ReplicateIngyFigure9-2/121_12_1	none	False	0	False	GridWorld	SUNY	FullObsDiscrete	Individual_Q	0.2	0.05	0.05	1	-50	1000
ReplicateIngyFigure9-2/122_12_2	none	False	0	False	GridWorld	SUNY	FullObsDiscrete	Individual_Q	0.2	0.05	0.05	2	-50	1000
ReplicateIngyFigure9-2/123_12_3	none	False	0	False	GridWorld	SUNY	FullObsDiscrete	Individual_Q	0.2	0.05	0.05	3	-50	1000
ReplicateIngyFigure9-2/124_12_4	none	False	0	False	GridWorld	SUNY	FullObsDiscrete	Individual_Q	0.2	0.05	0.05	4	-50	1000
ReplicateIngyFigure9-2/125_12_5	none	False	0	False	GridWorld	SUNY	FullObsDiscrete	Individual_Q	0.2	0.05	0.05	5	-50	1000
ReplicateIngyFigure9-2/126_12_6	none	False	0	False	GridWorld	SUNY	FullObsDiscrete	Individual_Q	0.2	0.05	0.05	6	-50	1000
ReplicateIngyFigure9-2/127_12_7	none	False	0	False	GridWorld	SUNY	FullObsDiscrete	Individual_Q	0.2	0.05	0.05	7	-50	1000
ReplicateIngyFigure9-2/128_12_8	none	False	0	False	GridWorld	SUNY	FullObsDiscrete	Individual_Q	0.2	0.05	0.05	8	-50	1000
ReplicateIngyFigure9-2/129_12_9	none	False	0	False	GridWorld	SUNY	FullObsDiscrete	Individual_Q	0.2	0.05	0.05	9	-50	1000
ReplicateIngyFigure9-2/130_13_0	none	False	0	False	GridWorld	SUNY	FullObsDiscrete	Individual_Q	0.2	0.05	0.05	0	-75	1000
ReplicateIngyFigure9-2/131_13_1	none	False	0	False	GridWorld	SUNY	FullObsDiscrete	Individual_Q	0.2	0.05	0.05	1	-75	1000
ReplicateIngyFigure9-2/132_13_2	none	False	0	False	GridWorld	SUNY	FullObsDiscrete	Individual_Q	0.2	0.05	0.05	2	-75	1000
ReplicateIngyFigure9-2/133_13_3	none	False	0	False	GridWorld	SUNY	FullObsDiscrete	Individual_Q	0.2	0.05	0.05	3	-75	1000
ReplicateIngyFigure9-2/134_13_4	none	False	0	False	GridWorld	SUNY	FullObsDiscrete	Individual_Q	0.2	0.05	0.05	4	-75	1000
ReplicateIngyFigure9-2/135_13_5	none	False	0	False	GridWorld	SUNY	FullObsDiscrete	Individual_Q	0.2	0.05	0.05	5	-75	1000
ReplicateIngyFigure9-2/136_13_6	none	False	0	False	GridWorld	SUNY	FullObsDiscrete	Individual_Q	0.2	0.05	0.05	6	-75	1000
ReplicateIngyFigure9-2/137_13_7	none	False	0	False	GridWorld	SUNY	FullObsDiscrete	Individual_Q	0.2	0.05	0.05	7	-75	1000
ReplicateIngyFigure9-2/138_13_8	none	False	0	False	GridWorld	SUNY	FullObsDiscrete	Individual_Q	0.2	0.05	0.05	8	-75	1000
ReplicateIngyFigure9-2/139_13_9	none	False	0	False	GridWorld	SUNY	FullObsDiscrete	Individual_Q	0.2	0.05	0.05	9	-75	1000
ReplicateIngyFigure9-2/140_14_0	none	False	0	False	GridWorld	SUNY	FullObsDiscrete	Individual_Q	0.2	0.05	0.05	0	-100	1000
ReplicateIngyFigure9-2/141_14_1	none	False	0	False	GridWorld	SUNY	FullObsDiscrete	Individual_Q	0.2	0.05	0.05	1	-100	1000
ReplicateIngyFigure9-2/142_14_2	none	False	0	False	GridWorld	SUNY	FullObsDiscrete	Individual_Q	0.2	0.05	0.05	2	-100	1000
ReplicateIngyFigure9-2/143_14_3	none	False	0	False	GridWorld	SUNY	FullObsDiscrete	Individual_Q	0.2	0.05	0.05	3	-100	1000
ReplicateIngyFigure9-2/144_14_4	none	False	0	False	GridWorld	SUNY	FullObsDiscrete	Individual_Q	0.2	0.05	0.05	4	-100	1000
ReplicateIngyFigure9-2/145_14_5	none	False	0	False	GridWorld	SUNY	FullObsDiscrete	Individual_Q	0.2	0.05	0.05	5	-100	1000
ReplicateIngyFigure9-2/146_14_6	none	False	0	False	GridWorld	SUNY	FullObsDiscrete	Individual_Q	0.2	0.05	0.05	6	-100	1000
ReplicateIngyFigure9-2/147_14_7	none	False	0	False	GridWorld	SUNY	FullObsDiscrete	Individual_Q	0.2	0.05	0.05	7	-100	1000
ReplicateIngyFigure9-2/148_14_8	none	False	0	False	GridWorld	SUNY	FullObsDiscrete	Individual_Q	0.2	0.05	0.05	8	-100	1000
ReplicateIngyFigure9-2/149_14_9	none	False	0	False	GridWorld	SUNY	FullObsDiscrete	Individual_Q	0.2	0.05	0.05	9	-100	1000
ReplicateIngyFigure9-2/150_15_0	none	False	0	False	GridWorld	MIT	FullObsDiscrete	Individual_Q	0.2	0.05	0.05	0	0	1000
ReplicateIngyFigure9-2/151_15_1	none	False	0	False	GridWorld	MIT	FullObsDiscrete	Individual_Q	0.2	0.05	0.05	1	0	1000
ReplicateIngyFigure9-2/152_15_2	none	False	0	False	GridWorld	MIT	FullObsDiscrete	Individual_Q	0.2	0.05	0.05	2	0	1000
ReplicateIngyFigure9-2/153_15_3	none	False	0	False	GridWorld	MIT	FullObsDiscrete	Individual_Q	0.2	0.05	0.05	3	0	1000
ReplicateIngyFigure9-2/154_15_4	none	False	0	False	GridWorld	MIT	FullObsDiscrete	Individual_Q	0.2	0.05	0.05	4	0	1000
ReplicateIngyFigure9-2/155_15_5	none	False	0	False	GridWorld	MIT	FullObsDiscrete	Individual_Q	0.2	0.05	0.05	5	0	1000
ReplicateIngyFigure9-2/156_15_6	none	False	0	False	GridWorld	MIT	FullObsDiscrete	Individual_Q	0.2	0.05	0.05	6	0	1000
ReplicateIngyFigure9-2/157_15_7	none	False	0	False	GridWorld	MIT	FullObsDiscrete	Individual_Q	0.2	0.05	0.05	7	0	1000
ReplicateIngyFigure9-2/158_15_8	none	False	0	False	GridWorld	MIT	FullObsDiscrete	Individual_Q	0.2	0.05	0.05	8	0	1000
ReplicateIngyFigure9-2/159_15_9	none	False	0	False	GridWorld	MIT	FullObsDiscrete	Individual_Q	0.2	0.05	0.05	9	0	1000
ReplicateIngyFigure9-2/160_16_0	none	False	0	False	GridWorld	MIT	FullObsDiscrete	Individual_Q	0.2	0.05	0.05	0	-25	1000
ReplicateIngyFigure9-2/161_16_1	none	False	0	False	GridWorld	MIT	FullObsDiscrete	Individual_Q	0.2	0.05	0.05	1	-25	1000
ReplicateIngyFigure9-2/162_16_2	none	False	0	False	GridWorld	MIT	FullObsDiscrete	Individual_Q	0.2	0.05	0.05	2	-25	1000
ReplicateIngyFigure9-2/163_16_3	none	False	0	False	GridWorld	MIT	FullObsDiscrete	Individual_Q	0.2	0.05	0.05	3	-25	1000
ReplicateIngyFigure9-2/164_16_4	none	False	0	False	GridWorld	MIT	FullObsDiscrete	Individual_Q	0.2	0.05	0.05	4	-25	1000
ReplicateIngyFigure9-2/165_16_5	none	False	0	False	GridWorld	MIT	FullObsDiscrete	Individual_Q	0.2	0.05	0.05	5	-25	1000
ReplicateIngyFigure9-2/166_16_6	none	False	0	False	GridWorld	MIT	FullObsDiscrete	Individual_Q	0.2	0.05	0.05	6	-25	1000
ReplicateIngyFigure9-2/167_16_7	none	False	0	False	GridWorld	MIT	FullObsDiscrete	Individual_Q	0.2	0.05	0.05	7	-25	1000
ReplicateIngyFigure9-2/168_16_8	none	False	0	False	GridWorld	MIT	FullObsDiscrete	Individual_Q	0.2	0.05	0.05	8	-25	1000
ReplicateIngyFigure9-2/169_16_9	none	False	0	False	GridWorld	MIT	FullObsDiscrete	Individual_Q	0.2	0.05	0.05	9	-25	1000
ReplicateIngyFigure9-2/170_17_0	none	False	0	False	GridWorld	MIT	FullObsDiscrete	Individual_Q	0.2	0.05	0.05	0	-50	1000
ReplicateIngyFigure9-2/171_17_1	none	False	0	False	GridWorld	MIT	FullObsDiscrete	Individual_Q	0.2	0.05	0.05	1	-50	1000
ReplicateIngyFigure9-2/172_17_2	none	False	0	False	GridWorld	MIT	FullObsDiscrete	Individual_Q	0.2	0.05	0.05	2	-50	1000
ReplicateIngyFigure9-2/173_17_3	none	False	0	False	GridWorld	MIT	FullObsDiscrete	Individual_Q	0.2	0.05	0.05	3	-50	1000
ReplicateIngyFigure9-2/174_17_4	none	False	0	False	GridWorld	MIT	FullObsDiscrete	Individual_Q	0.2	0.05	0.05	4	-50	1000
ReplicateIngyFigure9-2/175_17_5	none	False	0	False	GridWorld	MIT	FullObsDiscrete	Individual_Q	0.2	0.05	0.05	5	-50	1000
ReplicateIngyFigure9-2/176_17_6	none	False	0	False	GridWorld	MIT	FullObsDiscrete	Individual_Q	0.2	0.05	0.05	6	-50	1000
ReplicateIngyFigure9-2/177_17_7	none	False	0	False	GridWorld	MIT	FullObsDiscrete	Individual_Q	0.2	0.05	0.05	7	-50	1000
ReplicateIngyFigure9-2/178_17_8	none	False	0	False	GridWorld	MIT	FullObsDiscrete	Individual_Q	0.2	0.05	0.05	8	-50	1000
ReplicateIngyFigure9-2/179_17_9	none	False	0	False	GridWorld	MIT	FullObsDiscrete	Individual_Q	0.2	0.05	0.05	9	-50	1000
ReplicateIngyFigure9-2/180_18_0	none	False	0	False	GridWorld	MIT	FullObsDiscrete	Individual_Q	0.2	0.05	0.05	0	-75	1000
ReplicateIngyFigure9-2/181_18_1	none	False	0	False	GridWorld	MIT	FullObsDiscrete	Individual_Q	0.2	0.05	0.05	1	-75	1000
ReplicateIngyFigure9-2/182_18_2	none	False	0	False	GridWorld	MIT	FullObsDiscrete	Individual_Q	0.2	0.05	0.05	2	-75	1000
ReplicateIngyFigure9-2/183_18_3	none	False	0	False	GridWorld	MIT	FullObsDiscrete	Individual_Q	0.2	0.05	0.05	3	-75	1000
ReplicateIngyFigure9-2/184_18_4	none	False	0	False	GridWorld	MIT	FullObsDiscrete	Individual_Q	0.2	0.05	0.05	4	-75	1000
ReplicateIngyFigure9-2/185_18_5	none	False	0	False	GridWorld	MIT	FullObsDiscrete	Individual_Q	0.2	0.05	0.05	5	-75	1000
ReplicateIngyFigure9-2/186_18_6	none	False	0	False	GridWorld	MIT	FullObsDiscrete	Individual_Q	0.2	0.05	0.05	6	-75	1000
ReplicateIngyFigure9-2/187_18_7	none	False	0	False	GridWorld	MIT	FullObsDiscrete	Individual_Q	0.2	0.05	0.05	7	-75	1000
ReplicateIngyFigure9-2/188_18_8	none	False	0	False	GridWorld	MIT	FullObsDiscrete	Individual_Q	0.2	0.05	0.05	8	-75	1000
ReplicateIngyFigure9-2/189_18_9	none	False	0	False	GridWorld	MIT	FullObsDiscrete	Individual_Q	0.2	0.05	0.05	9	-75	1000
ReplicateIngyFigure9-2/190_19_0	none	False	0	False	GridWorld	MIT	FullObsDiscrete	Individual_Q	0.2	0.05	0.05	0	-100	1000
ReplicateIngyFigure9-2/191_19_1	none	False	0	False	GridWorld	MIT	FullObsDiscrete	Individual_Q	0.2	0.05	0.05	1	-100	1000
ReplicateIngyFigure9-2/192_19_2	none	False	0	False	GridWorld	MIT	FullObsDiscrete	Individual_Q	0.2	0.05	0.05	2	-100	1000
ReplicateIngyFigure9-2/193_19_3	none	False	0	False	GridWorld	MIT	FullObsDiscrete	Individual_Q	0.2	0.05	0.05	3	-100	1000
ReplicateIngyFigure9-2/194_19_4	none	False	0	False	GridWorld	MIT	FullObsDiscrete	Individual_Q	0.2	0.05	0.05	4	-100	1000
ReplicateIngyFigure9-2/195_19_5	none	False	0	False	GridWorld	MIT	FullObsDiscrete	Individual_Q	0.2	0.05	0.05	5	-100	1000
ReplicateIngyFigure9-2/196_19_6	none	False	0	False	GridWorld	MIT	FullObsDiscrete	Individual_Q	0.2	0.05	0.05	6	-100	1000
ReplicateIngyFigure9-2/197_19_7	none	False	0	False	GridWorld	MIT	FullObsDiscrete	Individual_Q	0.2	0.05	0.05	7	-100	1000
ReplicateIngyFigure9-2/198_19_8	none	False	0	False	GridWorld	MIT	FullObsDiscrete	Individual_Q	0.2	0.05	0.05	8	-100	1000
ReplicateIngyFigure9-2/199_19_9	none	False	0	False	GridWorld	MIT	FullObsDiscrete	Individual_Q	0.2	0.05	0.05	9	-100	1000
