# Supplementary material
Source: ML conference proceedings conference paper supplement (https://proceedings.neurips.cc/paper_files/paper/2022/hash/57444e14ecd9e2c8f603b4f012ce3811-Abstract.html)
Supplement: Supplementary file 1 [file 57444e14ecd9e2c8f603b4f012ce3811-Supplemental-Conference.zip › 3410_shield_decentralization_for_sa-Supplementary Material/parallel_configs/ReplicateIngyFigure9-3.csv]

run_name	shield	punish_unsafe_orig_action	punish_unsafe_orig_action_modifier	randomize_starts	map_type	grid_world_map_name	grid_world_obs_type	learner_type	learner_anneal_eps_start	learner_anneal_eps_finish	learner_evaluation_epsilon	seed	grid_world_collision_penalty	grid_world_agents_bounce	max_num_episodes
ReplicateIngyFigure9-3/0_0_0	none	False	0	False	GridWorld	Pentagon	FullObsDiscrete	Individual_Q	1.0	0.05	0.05	0	0	True	1000
ReplicateIngyFigure9-3/1_0_1	none	False	0	False	GridWorld	Pentagon	FullObsDiscrete	Individual_Q	1.0	0.05	0.05	1	0	True	1000
ReplicateIngyFigure9-3/2_0_2	none	False	0	False	GridWorld	Pentagon	FullObsDiscrete	Individual_Q	1.0	0.05	0.05	2	0	True	1000
ReplicateIngyFigure9-3/3_0_3	none	False	0	False	GridWorld	Pentagon	FullObsDiscrete	Individual_Q	1.0	0.05	0.05	3	0	True	1000
ReplicateIngyFigure9-3/4_0_4	none	False	0	False	GridWorld	Pentagon	FullObsDiscrete	Individual_Q	1.0	0.05	0.05	4	0	True	1000
ReplicateIngyFigure9-3/5_0_5	none	False	0	False	GridWorld	Pentagon	FullObsDiscrete	Individual_Q	1.0	0.05	0.05	5	0	True	1000
ReplicateIngyFigure9-3/6_0_6	none	False	0	False	GridWorld	Pentagon	FullObsDiscrete	Individual_Q	1.0	0.05	0.05	6	0	True	1000
ReplicateIngyFigure9-3/7_0_7	none	False	0	False	GridWorld	Pentagon	FullObsDiscrete	Individual_Q	1.0	0.05	0.05	7	0	True	1000
ReplicateIngyFigure9-3/8_0_8	none	False	0	False	GridWorld	Pentagon	FullObsDiscrete	Individual_Q	1.0	0.05	0.05	8	0	True	1000
ReplicateIngyFigure9-3/9_0_9	none	False	0	False	GridWorld	Pentagon	FullObsDiscrete	Individual_Q	1.0	0.05	0.05	9	0	True	1000
ReplicateIngyFigure9-3/10_1_0	none	False	0	False	GridWorld	Pentagon	FullObsDiscrete	Individual_Q	1.0	0.05	0.05	0	-25	True	1000
ReplicateIngyFigure9-3/11_1_1	none	False	0	False	GridWorld	Pentagon	FullObsDiscrete	Individual_Q	1.0	0.05	0.05	1	-25	True	1000
ReplicateIngyFigure9-3/12_1_2	none	False	0	False	GridWorld	Pentagon	FullObsDiscrete	Individual_Q	1.0	0.05	0.05	2	-25	True	1000
ReplicateIngyFigure9-3/13_1_3	none	False	0	False	GridWorld	Pentagon	FullObsDiscrete	Individual_Q	1.0	0.05	0.05	3	-25	True	1000
ReplicateIngyFigure9-3/14_1_4	none	False	0	False	GridWorld	Pentagon	FullObsDiscrete	Individual_Q	1.0	0.05	0.05	4	-25	True	1000
ReplicateIngyFigure9-3/15_1_5	none	False	0	False	GridWorld	Pentagon	FullObsDiscrete	Individual_Q	1.0	0.05	0.05	5	-25	True	1000
ReplicateIngyFigure9-3/16_1_6	none	False	0	False	GridWorld	Pentagon	FullObsDiscrete	Individual_Q	1.0	0.05	0.05	6	-25	True	1000
ReplicateIngyFigure9-3/17_1_7	none	False	0	False	GridWorld	Pentagon	FullObsDiscrete	Individual_Q	1.0	0.05	0.05	7	-25	True	1000
ReplicateIngyFigure9-3/18_1_8	none	False	0	False	GridWorld	Pentagon	FullObsDiscrete	Individual_Q	1.0	0.05	0.05	8	-25	True	1000
ReplicateIngyFigure9-3/19_1_9	none	False	0	False	GridWorld	Pentagon	FullObsDiscrete	Individual_Q	1.0	0.05	0.05	9	-25	True	1000
ReplicateIngyFigure9-3/20_2_0	none	False	0	False	GridWorld	Pentagon	FullObsDiscrete	Individual_Q	1.0	0.05	0.05	0	-50	True	1000
ReplicateIngyFigure9-3/21_2_1	none	False	0	False	GridWorld	Pentagon	FullObsDiscrete	Individual_Q	1.0	0.05	0.05	1	-50	True	1000
ReplicateIngyFigure9-3/22_2_2	none	False	0	False	GridWorld	Pentagon	FullObsDiscrete	Individual_Q	1.0	0.05	0.05	2	-50	True	1000
ReplicateIngyFigure9-3/23_2_3	none	False	0	False	GridWorld	Pentagon	FullObsDiscrete	Individual_Q	1.0	0.05	0.05	3	-50	True	1000
ReplicateIngyFigure9-3/24_2_4	none	False	0	False	GridWorld	Pentagon	FullObsDiscrete	Individual_Q	1.0	0.05	0.05	4	-50	True	1000
ReplicateIngyFigure9-3/25_2_5	none	False	0	False	GridWorld	Pentagon	FullObsDiscrete	Individual_Q	1.0	0.05	0.05	5	-50	True	1000
ReplicateIngyFigure9-3/26_2_6	none	False	0	False	GridWorld	Pentagon	FullObsDiscrete	Individual_Q	1.0	0.05	0.05	6	-50	True	1000
ReplicateIngyFigure9-3/27_2_7	none	False	0	False	GridWorld	Pentagon	FullObsDiscrete	Individual_Q	1.0	0.05	0.05	7	-50	True	1000
ReplicateIngyFigure9-3/28_2_8	none	False	0	False	GridWorld	Pentagon	FullObsDiscrete	Individual_Q	1.0	0.05	0.05	8	-50	True	1000
ReplicateIngyFigure9-3/29_2_9	none	False	0	False	GridWorld	Pentagon	FullObsDiscrete	Individual_Q	1.0	0.05	0.05	9	-50	True	1000
ReplicateIngyFigure9-3/30_3_0	none	False	0	False	GridWorld	Pentagon	FullObsDiscrete	Individual_Q	1.0	0.05	0.05	0	-75	True	1000
ReplicateIngyFigure9-3/31_3_1	none	False	0	False	GridWorld	Pentagon	FullObsDiscrete	Individual_Q	1.0	0.05	0.05	1	-75	True	1000
ReplicateIngyFigure9-3/32_3_2	none	False	0	False	GridWorld	Pentagon	FullObsDiscrete	Individual_Q	1.0	0.05	0.05	2	-75	True	1000
ReplicateIngyFigure9-3/33_3_3	none	False	0	False	GridWorld	Pentagon	FullObsDiscrete	Individual_Q	1.0	0.05	0.05	3	-75	True	1000
ReplicateIngyFigure9-3/34_3_4	none	False	0	False	GridWorld	Pentagon	FullObsDiscrete	Individual_Q	1.0	0.05	0.05	4	-75	True	1000
ReplicateIngyFigure9-3/35_3_5	none	False	0	False	GridWorld	Pentagon	FullObsDiscrete	Individual_Q	1.0	0.05	0.05	5	-75	True	1000
ReplicateIngyFigure9-3/36_3_6	none	False	0	False	GridWorld	Pentagon	FullObsDiscrete	Individual_Q	1.0	0.05	0.05	6	-75	True	1000
ReplicateIngyFigure9-3/37_3_7	none	False	0	False	GridWorld	Pentagon	FullObsDiscrete	Individual_Q	1.0	0.05	0.05	7	-75	True	1000
ReplicateIngyFigure9-3/38_3_8	none	False	0	False	GridWorld	Pentagon	FullObsDiscrete	Individual_Q	1.0	0.05	0.05	8	-75	True	1000
ReplicateIngyFigure9-3/39_3_9	none	False	0	False	GridWorld	Pentagon	FullObsDiscrete	Individual_Q	1.0	0.05	0.05	9	-75	True	1000
ReplicateIngyFigure9-3/40_4_0	none	False	0	False	GridWorld	Pentagon	FullObsDiscrete	Individual_Q	1.0	0.05	0.05	0	-100	True	1000
ReplicateIngyFigure9-3/41_4_1	none	False	0	False	GridWorld	Pentagon	FullObsDiscrete	Individual_Q	1.0	0.05	0.05	1	-100	True	1000
ReplicateIngyFigure9-3/42_4_2	none	False	0	False	GridWorld	Pentagon	FullObsDiscrete	Individual_Q	1.0	0.05	0.05	2	-100	True	1000
ReplicateIngyFigure9-3/43_4_3	none	False	0	False	GridWorld	Pentagon	FullObsDiscrete	Individual_Q	1.0	0.05	0.05	3	-100	True	1000
ReplicateIngyFigure9-3/44_4_4	none	False	0	False	GridWorld	Pentagon	FullObsDiscrete	Individual_Q	1.0	0.05	0.05	4	-100	True	1000
ReplicateIngyFigure9-3/45_4_5	none	False	0	False	GridWorld	Pentagon	FullObsDiscrete	Individual_Q	1.0	0.05	0.05	5	-100	True	1000
ReplicateIngyFigure9-3/46_4_6	none	False	0	False	GridWorld	Pentagon	FullObsDiscrete	Individual_Q	1.0	0.05	0.05	6	-100	True	1000
ReplicateIngyFigure9-3/47_4_7	none	False	0	False	GridWorld	Pentagon	FullObsDiscrete	Individual_Q	1.0	0.05	0.05	7	-100	True	1000
ReplicateIngyFigure9-3/48_4_8	none	False	0	False	GridWorld	Pentagon	FullObsDiscrete	Individual_Q	1.0	0.05	0.05	8	-100	True	1000
ReplicateIngyFigure9-3/49_4_9	none	False	0	False	GridWorld	Pentagon	FullObsDiscrete	Individual_Q	1.0	0.05	0.05	9	-100	True	1000
ReplicateIngyFigure9-3/50_5_0	none	False	0	False	GridWorld	ISR	FullObsDiscrete	Individual_Q	1.0	0.05	0.05	0	0	True	1000
ReplicateIngyFigure9-3/51_5_1	none	False	0	False	GridWorld	ISR	FullObsDiscrete	Individual_Q	1.0	0.05	0.05	1	0	True	1000
ReplicateIngyFigure9-3/52_5_2	none	False	0	False	GridWorld	ISR	FullObsDiscrete	Individual_Q	1.0	0.05	0.05	2	0	True	1000
ReplicateIngyFigure9-3/53_5_3	none	False	0	False	GridWorld	ISR	FullObsDiscrete	Individual_Q	1.0	0.05	0.05	3	0	True	1000
ReplicateIngyFigure9-3/54_5_4	none	False	0	False	GridWorld	ISR	FullObsDiscrete	Individual_Q	1.0	0.05	0.05	4	0	True	1000
ReplicateIngyFigure9-3/55_5_5	none	False	0	False	GridWorld	ISR	FullObsDiscrete	Individual_Q	1.0	0.05	0.05	5	0	True	1000
ReplicateIngyFigure9-3/56_5_6	none	False	0	False	GridWorld	ISR	FullObsDiscrete	Individual_Q	1.0	0.05	0.05	6	0	True	1000
ReplicateIngyFigure9-3/57_5_7	none	False	0	False	GridWorld	ISR	FullObsDiscrete	Individual_Q	1.0	0.05	0.05	7	0	True	1000
ReplicateIngyFigure9-3/58_5_8	none	False	0	False	GridWorld	ISR	FullObsDiscrete	Individual_Q	1.0	0.05	0.05	8	0	True	1000
ReplicateIngyFigure9-3/59_5_9	none	False	0	False	GridWorld	ISR	FullObsDiscrete	Individual_Q	1.0	0.05	0.05	9	0	True	1000
ReplicateIngyFigure9-3/60_6_0	none	False	0	False	GridWorld	ISR	FullObsDiscrete	Individual_Q	1.0	0.05	0.05	0	-25	True	1000
ReplicateIngyFigure9-3/61_6_1	none	False	0	False	GridWorld	ISR	FullObsDiscrete	Individual_Q	1.0	0.05	0.05	1	-25	True	1000
ReplicateIngyFigure9-3/62_6_2	none	False	0	False	GridWorld	ISR	FullObsDiscrete	Individual_Q	1.0	0.05	0.05	2	-25	True	1000
ReplicateIngyFigure9-3/63_6_3	none	False	0	False	GridWorld	ISR	FullObsDiscrete	Individual_Q	1.0	0.05	0.05	3	-25	True	1000
ReplicateIngyFigure9-3/64_6_4	none	False	0	False	GridWorld	ISR	FullObsDiscrete	Individual_Q	1.0	0.05	0.05	4	-25	True	1000
ReplicateIngyFigure9-3/65_6_5	none	False	0	False	GridWorld	ISR	FullObsDiscrete	Individual_Q	1.0	0.05	0.05	5	-25	True	1000
ReplicateIngyFigure9-3/66_6_6	none	False	0	False	GridWorld	ISR	FullObsDiscrete	Individual_Q	1.0	0.05	0.05	6	-25	True	1000
ReplicateIngyFigure9-3/67_6_7	none	False	0	False	GridWorld	ISR	FullObsDiscrete	Individual_Q	1.0	0.05	0.05	7	-25	True	1000
ReplicateIngyFigure9-3/68_6_8	none	False	0	False	GridWorld	ISR	FullObsDiscrete	Individual_Q	1.0	0.05	0.05	8	-25	True	1000
ReplicateIngyFigure9-3/69_6_9	none	False	0	False	GridWorld	ISR	FullObsDiscrete	Individual_Q	1.0	0.05	0.05	9	-25	True	1000
ReplicateIngyFigure9-3/70_7_0	none	False	0	False	GridWorld	ISR	FullObsDiscrete	Individual_Q	1.0	0.05	0.05	0	-50	True	1000
ReplicateIngyFigure9-3/71_7_1	none	False	0	False	GridWorld	ISR	FullObsDiscrete	Individual_Q	1.0	0.05	0.05	1	-50	True	1000
ReplicateIngyFigure9-3/72_7_2	none	False	0	False	GridWorld	ISR	FullObsDiscrete	Individual_Q	1.0	0.05	0.05	2	-50	True	1000
ReplicateIngyFigure9-3/73_7_3	none	False	0	False	GridWorld	ISR	FullObsDiscrete	Individual_Q	1.0	0.05	0.05	3	-50	True	1000
ReplicateIngyFigure9-3/74_7_4	none	False	0	False	GridWorld	ISR	FullObsDiscrete	Individual_Q	1.0	0.05	0.05	4	-50	True	1000
ReplicateIngyFigure9-3/75_7_5	none	False	0	False	GridWorld	ISR	FullObsDiscrete	Individual_Q	1.0	0.05	0.05	5	-50	True	1000
ReplicateIngyFigure9-3/76_7_6	none	False	0	False	GridWorld	ISR	FullObsDiscrete	Individual_Q	1.0	0.05	0.05	6	-50	True	1000
ReplicateIngyFigure9-3/77_7_7	none	False	0	False	GridWorld	ISR	FullObsDiscrete	Individual_Q	1.0	0.05	0.05	7	-50	True	1000
ReplicateIngyFigure9-3/78_7_8	none	False	0	False	GridWorld	ISR	FullObsDiscrete	Individual_Q	1.0	0.05	0.05	8	-50	True	1000
ReplicateIngyFigure9-3/79_7_9	none	False	0	False	GridWorld	ISR	FullObsDiscrete	Individual_Q	1.0	0.05	0.05	9	-50	True	1000
ReplicateIngyFigure9-3/80_8_0	none	False	0	False	GridWorld	ISR	FullObsDiscrete	Individual_Q	1.0	0.05	0.05	0	-75	True	1000
ReplicateIngyFigure9-3/81_8_1	none	False	0	False	GridWorld	ISR	FullObsDiscrete	Individual_Q	1.0	0.05	0.05	1	-75	True	1000
ReplicateIngyFigure9-3/82_8_2	none	False	0	False	GridWorld	ISR	FullObsDiscrete	Individual_Q	1.0	0.05	0.05	2	-75	True	1000
ReplicateIngyFigure9-3/83_8_3	none	False	0	False	GridWorld	ISR	FullObsDiscrete	Individual_Q	1.0	0.05	0.05	3	-75	True	1000
ReplicateIngyFigure9-3/84_8_4	none	False	0	False	GridWorld	ISR	FullObsDiscrete	Individual_Q	1.0	0.05	0.05	4	-75	True	1000
ReplicateIngyFigure9-3/85_8_5	none	False	0	False	GridWorld	ISR	FullObsDiscrete	Individual_Q	1.0	0.05	0.05	5	-75	True	1000
ReplicateIngyFigure9-3/86_8_6	none	False	0	False	GridWorld	ISR	FullObsDiscrete	Individual_Q	1.0	0.05	0.05	6	-75	True	1000
ReplicateIngyFigure9-3/87_8_7	none	False	0	False	GridWorld	ISR	FullObsDiscrete	Individual_Q	1.0	0.05	0.05	7	-75	True	1000
ReplicateIngyFigure9-3/88_8_8	none	False	0	False	GridWorld	ISR	FullObsDiscrete	Individual_Q	1.0	0.05	0.05	8	-75	True	1000
ReplicateIngyFigure9-3/89_8_9	none	False	0	False	GridWorld	ISR	FullObsDiscrete	Individual_Q	1.0	0.05	0.05	9	-75	True	1000
ReplicateIngyFigure9-3/90_9_0	none	False	0	False	GridWorld	ISR	FullObsDiscrete	Individual_Q	1.0	0.05	0.05	0	-100	True	1000
ReplicateIngyFigure9-3/91_9_1	none	False	0	False	GridWorld	ISR	FullObsDiscrete	Individual_Q	1.0	0.05	0.05	1	-100	True	1000
ReplicateIngyFigure9-3/92_9_2	none	False	0	False	GridWorld	ISR	FullObsDiscrete	Individual_Q	1.0	0.05	0.05	2	-100	True	1000
ReplicateIngyFigure9-3/93_9_3	none	False	0	False	GridWorld	ISR	FullObsDiscrete	Individual_Q	1.0	0.05	0.05	3	-100	True	1000
ReplicateIngyFigure9-3/94_9_4	none	False	0	False	GridWorld	ISR	FullObsDiscrete	Individual_Q	1.0	0.05	0.05	4	-100	True	1000
ReplicateIngyFigure9-3/95_9_5	none	False	0	False	GridWorld	ISR	FullObsDiscrete	Individual_Q	1.0	0.05	0.05	5	-100	True	1000
ReplicateIngyFigure9-3/96_9_6	none	False	0	False	GridWorld	ISR	FullObsDiscrete	Individual_Q	1.0	0.05	0.05	6	-100	True	1000
ReplicateIngyFigure9-3/97_9_7	none	False	0	False	GridWorld	ISR	FullObsDiscrete	Individual_Q	1.0	0.05	0.05	7	-100	True	1000
ReplicateIngyFigure9-3/98_9_8	none	False	0	False	GridWorld	ISR	FullObsDiscrete	Individual_Q	1.0	0.05	0.05	8	-100	True	1000
ReplicateIngyFigure9-3/99_9_9	none	False	0	False	GridWorld	ISR	FullObsDiscrete	Individual_Q	1.0	0.05	0.05	9	-100	True	1000
ReplicateIngyFigure9-3/100_10_0	none	False	0	False	GridWorld	SUNY	FullObsDiscrete	Individual_Q	1.0	0.05	0.05	0	0	True	1000
ReplicateIngyFigure9-3/101_10_1	none	False	0	False	GridWorld	SUNY	FullObsDiscrete	Individual_Q	1.0	0.05	0.05	1	0	True	1000
ReplicateIngyFigure9-3/102_10_2	none	False	0	False	GridWorld	SUNY	FullObsDiscrete	Individual_Q	1.0	0.05	0.05	2	0	True	1000
ReplicateIngyFigure9-3/103_10_3	none	False	0	False	GridWorld	SUNY	FullObsDiscrete	Individual_Q	1.0	0.05	0.05	3	0	True	1000
ReplicateIngyFigure9-3/104_10_4	none	False	0	False	GridWorld	SUNY	FullObsDiscrete	Individual_Q	1.0	0.05	0.05	4	0	True	1000
ReplicateIngyFigure9-3/105_10_5	none	False	0	False	GridWorld	SUNY	FullObsDiscrete	Individual_Q	1.0	0.05	0.05	5	0	True	1000
ReplicateIngyFigure9-3/106_10_6	none	False	0	False	GridWorld	SUNY	FullObsDiscrete	Individual_Q	1.0	0.05	0.05	6	0	True	1000
ReplicateIngyFigure9-3/107_10_7	none	False	0	False	GridWorld	SUNY	FullObsDiscrete	Individual_Q	1.0	0.05	0.05	7	0	True	1000
ReplicateIngyFigure9-3/108_10_8	none	False	0	False	GridWorld	SUNY	FullObsDiscrete	Individual_Q	1.0	0.05	0.05	8	0	True	1000
ReplicateIngyFigure9-3/109_10_9	none	False	0	False	GridWorld	SUNY	FullObsDiscrete	Individual_Q	1.0	0.05	0.05	9	0	True	1000
ReplicateIngyFigure9-3/110_11_0	none	False	0	False	GridWorld	SUNY	FullObsDiscrete	Individual_Q	1.0	0.05	0.05	0	-25	True	1000
ReplicateIngyFigure9-3/111_11_1	none	False	0	False	GridWorld	SUNY	FullObsDiscrete	Individual_Q	1.0	0.05	0.05	1	-25	True	1000
ReplicateIngyFigure9-3/112_11_2	none	False	0	False	GridWorld	SUNY	FullObsDiscrete	Individual_Q	1.0	0.05	0.05	2	-25	True	1000
ReplicateIngyFigure9-3/113_11_3	none	False	0	False	GridWorld	SUNY	FullObsDiscrete	Individual_Q	1.0	0.05	0.05	3	-25	True	1000
ReplicateIngyFigure9-3/114_11_4	none	False	0	False	GridWorld	SUNY	FullObsDiscrete	Individual_Q	1.0	0.05	0.05	4	-25	True	1000
ReplicateIngyFigure9-3/115_11_5	none	False	0	False	GridWorld	SUNY	FullObsDiscrete	Individual_Q	1.0	0.05	0.05	5	-25	True	1000
ReplicateIngyFigure9-3/116_11_6	none	False	0	False	GridWorld	SUNY	FullObsDiscrete	Individual_Q	1.0	0.05	0.05	6	-25	True	1000
ReplicateIngyFigure9-3/117_11_7	none	False	0	False	GridWorld	SUNY	FullObsDiscrete	Individual_Q	1.0	0.05	0.05	7	-25	True	1000
ReplicateIngyFigure9-3/118_11_8	none	False	0	False	GridWorld	SUNY	FullObsDiscrete	Individual_Q	1.0	0.05	0.05	8	-25	True	1000
ReplicateIngyFigure9-3/119_11_9	none	False	0	False	GridWorld	SUNY	FullObsDiscrete	Individual_Q	1.0	0.05	0.05	9	-25	True	1000
ReplicateIngyFigure9-3/120_12_0	none	False	0	False	GridWorld	SUNY	FullObsDiscrete	Individual_Q	1.0	0.05	0.05	0	-50	True	1000
ReplicateIngyFigure9-3/121_12_1	none	False	0	False	GridWorld	SUNY	FullObsDiscrete	Individual_Q	1.0	0.05	0.05	1	-50	True	1000
ReplicateIngyFigure9-3/122_12_2	none	False	0	False	GridWorld	SUNY	FullObsDiscrete	Individual_Q	1.0	0.05	0.05	2	-50	True	1000
ReplicateIngyFigure9-3/123_12_3	none	False	0	False	GridWorld	SUNY	FullObsDiscrete	Individual_Q	1.0	0.05	0.05	3	-50	True	1000
ReplicateIngyFigure9-3/124_12_4	none	False	0	False	GridWorld	SUNY	FullObsDiscrete	Individual_Q	1.0	0.05	0.05	4	-50	True	1000
ReplicateIngyFigure9-3/125_12_5	none	False	0	False	GridWorld	SUNY	FullObsDiscrete	Individual_Q	1.0	0.05	0.05	5	-50	True	1000
ReplicateIngyFigure9-3/126_12_6	none	False	0	False	GridWorld	SUNY	FullObsDiscrete	Individual_Q	1.0	0.05	0.05	6	-50	True	1000
ReplicateIngyFigure9-3/127_12_7	none	False	0	False	GridWorld	SUNY	FullObsDiscrete	Individual_Q	1.0	0.05	0.05	7	-50	True	1000
ReplicateIngyFigure9-3/128_12_8	none	False	0	False	GridWorld	SUNY	FullObsDiscrete	Individual_Q	1.0	0.05	0.05	8	-50	True	1000
ReplicateIngyFigure9-3/129_12_9	none	False	0	False	GridWorld	SUNY	FullObsDiscrete	Individual_Q	1.0	0.05	0.05	9	-50	True	1000
ReplicateIngyFigure9-3/130_13_0	none	False	0	False	GridWorld	SUNY	FullObsDiscrete	Individual_Q	1.0	0.05	0.05	0	-75	True	1000
ReplicateIngyFigure9-3/131_13_1	none	False	0	False	GridWorld	SUNY	FullObsDiscrete	Individual_Q	1.0	0.05	0.05	1	-75	True	1000
ReplicateIngyFigure9-3/132_13_2	none	False	0	False	GridWorld	SUNY	FullObsDiscrete	Individual_Q	1.0	0.05	0.05	2	-75	True	1000
ReplicateIngyFigure9-3/133_13_3	none	False	0	False	GridWorld	SUNY	FullObsDiscrete	Individual_Q	1.0	0.05	0.05	3	-75	True	1000
ReplicateIngyFigure9-3/134_13_4	none	False	0	False	GridWorld	SUNY	FullObsDiscrete	Individual_Q	1.0	0.05	0.05	4	-75	True	1000
ReplicateIngyFigure9-3/135_13_5	none	False	0	False	GridWorld	SUNY	FullObsDiscrete	Individual_Q	1.0	0.05	0.05	5	-75	True	1000
ReplicateIngyFigure9-3/136_13_6	none	False	0	False	GridWorld	SUNY	FullObsDiscrete	Individual_Q	1.0	0.05	0.05	6	-75	True	1000
ReplicateIngyFigure9-3/137_13_7	none	False	0	False	GridWorld	SUNY	FullObsDiscrete	Individual_Q	1.0	0.05	0.05	7	-75	True	1000
ReplicateIngyFigure9-3/138_13_8	none	False	0	False	GridWorld	SUNY	FullObsDiscrete	Individual_Q	1.0	0.05	0.05	8	-75	True	1000
ReplicateIngyFigure9-3/139_13_9	none	False	0	False	GridWorld	SUNY	FullObsDiscrete	Individual_Q	1.0	0.05	0.05	9	-75	True	1000
ReplicateIngyFigure9-3/140_14_0	none	False	0	False	GridWorld	SUNY	FullObsDiscrete	Individual_Q	1.0	0.05	0.05	0	-100	True	1000
ReplicateIngyFigure9-3/141_14_1	none	False	0	False	GridWorld	SUNY	FullObsDiscrete	Individual_Q	1.0	0.05	0.05	1	-100	True	1000
ReplicateIngyFigure9-3/142_14_2	none	False	0	False	GridWorld	SUNY	FullObsDiscrete	Individual_Q	1.0	0.05	0.05	2	-100	True	1000
ReplicateIngyFigure9-3/143_14_3	none	False	0	False	GridWorld	SUNY	FullObsDiscrete	Individual_Q	1.0	0.05	0.05	3	-100	True	1000
ReplicateIngyFigure9-3/144_14_4	none	False	0	False	GridWorld	SUNY	FullObsDiscrete	Individual_Q	1.0	0.05	0.05	4	-100	True	1000
ReplicateIngyFigure9-3/145_14_5	none	False	0	False	GridWorld	SUNY	FullObsDiscrete	Individual_Q	1.0	0.05	0.05	5	-100	True	1000
ReplicateIngyFigure9-3/146_14_6	none	False	0	False	GridWorld	SUNY	FullObsDiscrete	Individual_Q	1.0	0.05	0.05	6	-100	True	1000
ReplicateIngyFigure9-3/147_14_7	none	False	0	False	GridWorld	SUNY	FullObsDiscrete	Individual_Q	1.0	0.05	0.05	7	-100	True	1000
ReplicateIngyFigure9-3/148_14_8	none	False	0	False	GridWorld	SUNY	FullObsDiscrete	Individual_Q	1.0	0.05	0.05	8	-100	True	1000
ReplicateIngyFigure9-3/149_14_9	none	False	0	False	GridWorld	SUNY	FullObsDiscrete	Individual_Q	1.0	0.05	0.05	9	-100	True	1000
ReplicateIngyFigure9-3/150_15_0	none	False	0	False	GridWorld	MIT	FullObsDiscrete	Individual_Q	1.0	0.05	0.05	0	0	True	1000
ReplicateIngyFigure9-3/151_15_1	none	False	0	False	GridWorld	MIT	FullObsDiscrete	Individual_Q	1.0	0.05	0.05	1	0	True	1000
ReplicateIngyFigure9-3/152_15_2	none	False	0	False	GridWorld	MIT	FullObsDiscrete	Individual_Q	1.0	0.05	0.05	2	0	True	1000
ReplicateIngyFigure9-3/153_15_3	none	False	0	False	GridWorld	MIT	FullObsDiscrete	Individual_Q	1.0	0.05	0.05	3	0	True	1000
ReplicateIngyFigure9-3/154_15_4	none	False	0	False	GridWorld	MIT	FullObsDiscrete	Individual_Q	1.0	0.05	0.05	4	0	True	1000
ReplicateIngyFigure9-3/155_15_5	none	False	0	False	GridWorld	MIT	FullObsDiscrete	Individual_Q	1.0	0.05	0.05	5	0	True	1000
ReplicateIngyFigure9-3/156_15_6	none	False	0	False	GridWorld	MIT	FullObsDiscrete	Individual_Q	1.0	0.05	0.05	6	0	True	1000
ReplicateIngyFigure9-3/157_15_7	none	False	0	False	GridWorld	MIT	FullObsDiscrete	Individual_Q	1.0	0.05	0.05	7	0	True	1000
ReplicateIngyFigure9-3/158_15_8	none	False	0	False	GridWorld	MIT	FullObsDiscrete	Individual_Q	1.0	0.05	0.05	8	0	True	1000
ReplicateIngyFigure9-3/159_15_9	none	False	0	False	GridWorld	MIT	FullObsDiscrete	Individual_Q	1.0	0.05	0.05	9	0	True	1000
ReplicateIngyFigure9-3/160_16_0	none	False	0	False	GridWorld	MIT	FullObsDiscrete	Individual_Q	1.0	0.05	0.05	0	-25	True	1000
ReplicateIngyFigure9-3/161_16_1	none	False	0	False	GridWorld	MIT	FullObsDiscrete	Individual_Q	1.0	0.05	0.05	1	-25	True	1000
ReplicateIngyFigure9-3/162_16_2	none	False	0	False	GridWorld	MIT	FullObsDiscrete	Individual_Q	1.0	0.05	0.05	2	-25	True	1000
ReplicateIngyFigure9-3/163_16_3	none	False	0	False	GridWorld	MIT	FullObsDiscrete	Individual_Q	1.0	0.05	0.05	3	-25	True	1000
ReplicateIngyFigure9-3/164_16_4	none	False	0	False	GridWorld	MIT	FullObsDiscrete	Individual_Q	1.0	0.05	0.05	4	-25	True	1000
ReplicateIngyFigure9-3/165_16_5	none	False	0	False	GridWorld	MIT	FullObsDiscrete	Individual_Q	1.0	0.05	0.05	5	-25	True	1000
ReplicateIngyFigure9-3/166_16_6	none	False	0	False	GridWorld	MIT	FullObsDiscrete	Individual_Q	1.0	0.05	0.05	6	-25	True	1000
ReplicateIngyFigure9-3/167_16_7	none	False	0	False	GridWorld	MIT	FullObsDiscrete	Individual_Q	1.0	0.05	0.05	7	-25	True	1000
ReplicateIngyFigure9-3/168_16_8	none	False	0	False	GridWorld	MIT	FullObsDiscrete	Individual_Q	1.0	0.05	0.05	8	-25	True	1000
ReplicateIngyFigure9-3/169_16_9	none	False	0	False	GridWorld	MIT	FullObsDiscrete	Individual_Q	1.0	0.05	0.05	9	-25	True	1000
ReplicateIngyFigure9-3/170_17_0	none	False	0	False	GridWorld	MIT	FullObsDiscrete	Individual_Q	1.0	0.05	0.05	0	-50	True	1000
ReplicateIngyFigure9-3/171_17_1	none	False	0	False	GridWorld	MIT	FullObsDiscrete	Individual_Q	1.0	0.05	0.05	1	-50	True	1000
ReplicateIngyFigure9-3/172_17_2	none	False	0	False	GridWorld	MIT	FullObsDiscrete	Individual_Q	1.0	0.05	0.05	2	-50	True	1000
ReplicateIngyFigure9-3/173_17_3	none	False	0	False	GridWorld	MIT	FullObsDiscrete	Individual_Q	1.0	0.05	0.05	3	-50	True	1000
ReplicateIngyFigure9-3/174_17_4	none	False	0	False	GridWorld	MIT	FullObsDiscrete	Individual_Q	1.0	0.05	0.05	4	-50	True	1000
ReplicateIngyFigure9-3/175_17_5	none	False	0	False	GridWorld	MIT	FullObsDiscrete	Individual_Q	1.0	0.05	0.05	5	-50	True	1000
ReplicateIngyFigure9-3/176_17_6	none	False	0	False	GridWorld	MIT	FullObsDiscrete	Individual_Q	1.0	0.05	0.05	6	-50	True	1000
ReplicateIngyFigure9-3/177_17_7	none	False	0	False	GridWorld	MIT	FullObsDiscrete	Individual_Q	1.0	0.05	0.05	7	-50	True	1000
ReplicateIngyFigure9-3/178_17_8	none	False	0	False	GridWorld	MIT	FullObsDiscrete	Individual_Q	1.0	0.05	0.05	8	-50	True	1000
ReplicateIngyFigure9-3/179_17_9	none	False	0	False	GridWorld	MIT	FullObsDiscrete	Individual_Q	1.0	0.05	0.05	9	-50	True	1000
ReplicateIngyFigure9-3/180_18_0	none	False	0	False	GridWorld	MIT	FullObsDiscrete	Individual_Q	1.0	0.05	0.05	0	-75	True	1000
ReplicateIngyFigure9-3/181_18_1	none	False	0	False	GridWorld	MIT	FullObsDiscrete	Individual_Q	1.0	0.05	0.05	1	-75	True	1000
ReplicateIngyFigure9-3/182_18_2	none	False	0	False	GridWorld	MIT	FullObsDiscrete	Individual_Q	1.0	0.05	0.05	2	-75	True	1000
ReplicateIngyFigure9-3/183_18_3	none	False	0	False	GridWorld	MIT	FullObsDiscrete	Individual_Q	1.0	0.05	0.05	3	-75	True	1000
ReplicateIngyFigure9-3/184_18_4	none	False	0	False	GridWorld	MIT	FullObsDiscrete	Individual_Q	1.0	0.05	0.05	4	-75	True	1000
ReplicateIngyFigure9-3/185_18_5	none	False	0	False	GridWorld	MIT	FullObsDiscrete	Individual_Q	1.0	0.05	0.05	5	-75	True	1000
ReplicateIngyFigure9-3/186_18_6	none	False	0	False	GridWorld	MIT	FullObsDiscrete	Individual_Q	1.0	0.05	0.05	6	-75	True	1000
ReplicateIngyFigure9-3/187_18_7	none	False	0	False	GridWorld	MIT	FullObsDiscrete	Individual_Q	1.0	0.05	0.05	7	-75	True	1000
ReplicateIngyFigure9-3/188_18_8	none	False	0	False	GridWorld	MIT	FullObsDiscrete	Individual_Q	1.0	0.05	0.05	8	-75	True	1000
ReplicateIngyFigure9-3/189_18_9	none	False	0	False	GridWorld	MIT	FullObsDiscrete	Individual_Q	1.0	0.05	0.05	9	-75	True	1000
ReplicateIngyFigure9-3/190_19_0	none	False	0	False	GridWorld	MIT	FullObsDiscrete	Individual_Q	1.0	0.05	0.05	0	-100	True	1000
ReplicateIngyFigure9-3/191_19_1	none	False	0	False	GridWorld	MIT	FullObsDiscrete	Individual_Q	1.0	0.05	0.05	1	-100	True	1000
ReplicateIngyFigure9-3/192_19_2	none	False	0	False	GridWorld	MIT	FullObsDiscrete	Individual_Q	1.0	0.05	0.05	2	-100	True	1000
ReplicateIngyFigure9-3/193_19_3	none	False	0	False	GridWorld	MIT	FullObsDiscrete	Individual_Q	1.0	0.05	0.05	3	-100	True	1000
ReplicateIngyFigure9-3/194_19_4	none	False	0	False	GridWorld	MIT	FullObsDiscrete	Individual_Q	1.0	0.05	0.05	4	-100	True	1000
ReplicateIngyFigure9-3/195_19_5	none	False	0	False	GridWorld	MIT	FullObsDiscrete	Individual_Q	1.0	0.05	0.05	5	-100	True	1000
ReplicateIngyFigure9-3/196_19_6	none	False	0	False	GridWorld	MIT	FullObsDiscrete	Individual_Q	1.0	0.05	0.05	6	-100	True	1000
ReplicateIngyFigure9-3/197_19_7	none	False	0	False	GridWorld	MIT	FullObsDiscrete	Individual_Q	1.0	0.05	0.05	7	-100	True	1000
ReplicateIngyFigure9-3/198_19_8	none	False	0	False	GridWorld	MIT	FullObsDiscrete	Individual_Q	1.0	0.05	0.05	8	-100	True	1000
ReplicateIngyFigure9-3/199_19_9	none	False	0	False	GridWorld	MIT	FullObsDiscrete	Individual_Q	1.0	0.05	0.05	9	-100	True	1000
