# Supplementary material
Source: ML conference proceedings conference paper supplement (https://proceedings.neurips.cc/paper_files/paper/2022/hash/57444e14ecd9e2c8f603b4f012ce3811-Abstract.html)
Supplement: Supplementary file 1 [file 57444e14ecd9e2c8f603b4f012ce3811-Supplemental-Conference.zip › 3410_shield_decentralization_for_sa-Supplementary Material/parallel_configs/ReplicateIngyFigure9.csv]

run_name	shield	punish_unsafe_orig_action	punish_unsafe_orig_action_modifier	randomize_starts	map_type	grid_world_map_name	grid_world_obs_type	learner_type	learner_anneal_eps_start	learner_anneal_eps_finish	max_total_steps	seed	grid_world_collision_penalty	max_num_episodes
ReplicateIngyFigure9/0_0_0	none	False	0	False	GridWorld	Pentagon	FullObsDiscrete	Individual_Q	0.2	0.2	1000000	0	0	1000
ReplicateIngyFigure9/1_0_1	none	False	0	False	GridWorld	Pentagon	FullObsDiscrete	Individual_Q	0.2	0.2	1000000	1	0	1000
ReplicateIngyFigure9/2_0_2	none	False	0	False	GridWorld	Pentagon	FullObsDiscrete	Individual_Q	0.2	0.2	1000000	2	0	1000
ReplicateIngyFigure9/3_0_3	none	False	0	False	GridWorld	Pentagon	FullObsDiscrete	Individual_Q	0.2	0.2	1000000	3	0	1000
ReplicateIngyFigure9/4_0_4	none	False	0	False	GridWorld	Pentagon	FullObsDiscrete	Individual_Q	0.2	0.2	1000000	4	0	1000
ReplicateIngyFigure9/5_0_5	none	False	0	False	GridWorld	Pentagon	FullObsDiscrete	Individual_Q	0.2	0.2	1000000	5	0	1000
ReplicateIngyFigure9/6_0_6	none	False	0	False	GridWorld	Pentagon	FullObsDiscrete	Individual_Q	0.2	0.2	1000000	6	0	1000
ReplicateIngyFigure9/7_0_7	none	False	0	False	GridWorld	Pentagon	FullObsDiscrete	Individual_Q	0.2	0.2	1000000	7	0	1000
ReplicateIngyFigure9/8_0_8	none	False	0	False	GridWorld	Pentagon	FullObsDiscrete	Individual_Q	0.2	0.2	1000000	8	0	1000
ReplicateIngyFigure9/9_0_9	none	False	0	False	GridWorld	Pentagon	FullObsDiscrete	Individual_Q	0.2	0.2	1000000	9	0	1000
ReplicateIngyFigure9/10_1_0	none	False	0	False	GridWorld	Pentagon	FullObsDiscrete	Individual_Q	0.2	0.2	1000000	0	-25	1000
ReplicateIngyFigure9/11_1_1	none	False	0	False	GridWorld	Pentagon	FullObsDiscrete	Individual_Q	0.2	0.2	1000000	1	-25	1000
ReplicateIngyFigure9/12_1_2	none	False	0	False	GridWorld	Pentagon	FullObsDiscrete	Individual_Q	0.2	0.2	1000000	2	-25	1000
ReplicateIngyFigure9/13_1_3	none	False	0	False	GridWorld	Pentagon	FullObsDiscrete	Individual_Q	0.2	0.2	1000000	3	-25	1000
ReplicateIngyFigure9/14_1_4	none	False	0	False	GridWorld	Pentagon	FullObsDiscrete	Individual_Q	0.2	0.2	1000000	4	-25	1000
ReplicateIngyFigure9/15_1_5	none	False	0	False	GridWorld	Pentagon	FullObsDiscrete	Individual_Q	0.2	0.2	1000000	5	-25	1000
ReplicateIngyFigure9/16_1_6	none	False	0	False	GridWorld	Pentagon	FullObsDiscrete	Individual_Q	0.2	0.2	1000000	6	-25	1000
ReplicateIngyFigure9/17_1_7	none	False	0	False	GridWorld	Pentagon	FullObsDiscrete	Individual_Q	0.2	0.2	1000000	7	-25	1000
ReplicateIngyFigure9/18_1_8	none	False	0	False	GridWorld	Pentagon	FullObsDiscrete	Individual_Q	0.2	0.2	1000000	8	-25	1000
ReplicateIngyFigure9/19_1_9	none	False	0	False	GridWorld	Pentagon	FullObsDiscrete	Individual_Q	0.2	0.2	1000000	9	-25	1000
ReplicateIngyFigure9/20_2_0	none	False	0	False	GridWorld	Pentagon	FullObsDiscrete	Individual_Q	0.2	0.2	1000000	0	-50	1000
ReplicateIngyFigure9/21_2_1	none	False	0	False	GridWorld	Pentagon	FullObsDiscrete	Individual_Q	0.2	0.2	1000000	1	-50	1000
ReplicateIngyFigure9/22_2_2	none	False	0	False	GridWorld	Pentagon	FullObsDiscrete	Individual_Q	0.2	0.2	1000000	2	-50	1000
ReplicateIngyFigure9/23_2_3	none	False	0	False	GridWorld	Pentagon	FullObsDiscrete	Individual_Q	0.2	0.2	1000000	3	-50	1000
ReplicateIngyFigure9/24_2_4	none	False	0	False	GridWorld	Pentagon	FullObsDiscrete	Individual_Q	0.2	0.2	1000000	4	-50	1000
ReplicateIngyFigure9/25_2_5	none	False	0	False	GridWorld	Pentagon	FullObsDiscrete	Individual_Q	0.2	0.2	1000000	5	-50	1000
ReplicateIngyFigure9/26_2_6	none	False	0	False	GridWorld	Pentagon	FullObsDiscrete	Individual_Q	0.2	0.2	1000000	6	-50	1000
ReplicateIngyFigure9/27_2_7	none	False	0	False	GridWorld	Pentagon	FullObsDiscrete	Individual_Q	0.2	0.2	1000000	7	-50	1000
ReplicateIngyFigure9/28_2_8	none	False	0	False	GridWorld	Pentagon	FullObsDiscrete	Individual_Q	0.2	0.2	1000000	8	-50	1000
ReplicateIngyFigure9/29_2_9	none	False	0	False	GridWorld	Pentagon	FullObsDiscrete	Individual_Q	0.2	0.2	1000000	9	-50	1000
ReplicateIngyFigure9/30_3_0	none	False	0	False	GridWorld	Pentagon	FullObsDiscrete	Individual_Q	0.2	0.2	1000000	0	-75	1000
ReplicateIngyFigure9/31_3_1	none	False	0	False	GridWorld	Pentagon	FullObsDiscrete	Individual_Q	0.2	0.2	1000000	1	-75	1000
ReplicateIngyFigure9/32_3_2	none	False	0	False	GridWorld	Pentagon	FullObsDiscrete	Individual_Q	0.2	0.2	1000000	2	-75	1000
ReplicateIngyFigure9/33_3_3	none	False	0	False	GridWorld	Pentagon	FullObsDiscrete	Individual_Q	0.2	0.2	1000000	3	-75	1000
ReplicateIngyFigure9/34_3_4	none	False	0	False	GridWorld	Pentagon	FullObsDiscrete	Individual_Q	0.2	0.2	1000000	4	-75	1000
ReplicateIngyFigure9/35_3_5	none	False	0	False	GridWorld	Pentagon	FullObsDiscrete	Individual_Q	0.2	0.2	1000000	5	-75	1000
ReplicateIngyFigure9/36_3_6	none	False	0	False	GridWorld	Pentagon	FullObsDiscrete	Individual_Q	0.2	0.2	1000000	6	-75	1000
ReplicateIngyFigure9/37_3_7	none	False	0	False	GridWorld	Pentagon	FullObsDiscrete	Individual_Q	0.2	0.2	1000000	7	-75	1000
ReplicateIngyFigure9/38_3_8	none	False	0	False	GridWorld	Pentagon	FullObsDiscrete	Individual_Q	0.2	0.2	1000000	8	-75	1000
ReplicateIngyFigure9/39_3_9	none	False	0	False	GridWorld	Pentagon	FullObsDiscrete	Individual_Q	0.2	0.2	1000000	9	-75	1000
ReplicateIngyFigure9/40_4_0	none	False	0	False	GridWorld	Pentagon	FullObsDiscrete	Individual_Q	0.2	0.2	1000000	0	-100	1000
ReplicateIngyFigure9/41_4_1	none	False	0	False	GridWorld	Pentagon	FullObsDiscrete	Individual_Q	0.2	0.2	1000000	1	-100	1000
ReplicateIngyFigure9/42_4_2	none	False	0	False	GridWorld	Pentagon	FullObsDiscrete	Individual_Q	0.2	0.2	1000000	2	-100	1000
ReplicateIngyFigure9/43_4_3	none	False	0	False	GridWorld	Pentagon	FullObsDiscrete	Individual_Q	0.2	0.2	1000000	3	-100	1000
ReplicateIngyFigure9/44_4_4	none	False	0	False	GridWorld	Pentagon	FullObsDiscrete	Individual_Q	0.2	0.2	1000000	4	-100	1000
ReplicateIngyFigure9/45_4_5	none	False	0	False	GridWorld	Pentagon	FullObsDiscrete	Individual_Q	0.2	0.2	1000000	5	-100	1000
ReplicateIngyFigure9/46_4_6	none	False	0	False	GridWorld	Pentagon	FullObsDiscrete	Individual_Q	0.2	0.2	1000000	6	-100	1000
ReplicateIngyFigure9/47_4_7	none	False	0	False	GridWorld	Pentagon	FullObsDiscrete	Individual_Q	0.2	0.2	1000000	7	-100	1000
ReplicateIngyFigure9/48_4_8	none	False	0	False	GridWorld	Pentagon	FullObsDiscrete	Individual_Q	0.2	0.2	1000000	8	-100	1000
ReplicateIngyFigure9/49_4_9	none	False	0	False	GridWorld	Pentagon	FullObsDiscrete	Individual_Q	0.2	0.2	1000000	9	-100	1000
ReplicateIngyFigure9/50_5_0	none	False	0	False	GridWorld	ISR	FullObsDiscrete	Individual_Q	0.2	0.2	1000000	0	0	1000
ReplicateIngyFigure9/51_5_1	none	False	0	False	GridWorld	ISR	FullObsDiscrete	Individual_Q	0.2	0.2	1000000	1	0	1000
ReplicateIngyFigure9/52_5_2	none	False	0	False	GridWorld	ISR	FullObsDiscrete	Individual_Q	0.2	0.2	1000000	2	0	1000
ReplicateIngyFigure9/53_5_3	none	False	0	False	GridWorld	ISR	FullObsDiscrete	Individual_Q	0.2	0.2	1000000	3	0	1000
ReplicateIngyFigure9/54_5_4	none	False	0	False	GridWorld	ISR	FullObsDiscrete	Individual_Q	0.2	0.2	1000000	4	0	1000
ReplicateIngyFigure9/55_5_5	none	False	0	False	GridWorld	ISR	FullObsDiscrete	Individual_Q	0.2	0.2	1000000	5	0	1000
ReplicateIngyFigure9/56_5_6	none	False	0	False	GridWorld	ISR	FullObsDiscrete	Individual_Q	0.2	0.2	1000000	6	0	1000
ReplicateIngyFigure9/57_5_7	none	False	0	False	GridWorld	ISR	FullObsDiscrete	Individual_Q	0.2	0.2	1000000	7	0	1000
ReplicateIngyFigure9/58_5_8	none	False	0	False	GridWorld	ISR	FullObsDiscrete	Individual_Q	0.2	0.2	1000000	8	0	1000
ReplicateIngyFigure9/59_5_9	none	False	0	False	GridWorld	ISR	FullObsDiscrete	Individual_Q	0.2	0.2	1000000	9	0	1000
ReplicateIngyFigure9/60_6_0	none	False	0	False	GridWorld	ISR	FullObsDiscrete	Individual_Q	0.2	0.2	1000000	0	-25	1000
ReplicateIngyFigure9/61_6_1	none	False	0	False	GridWorld	ISR	FullObsDiscrete	Individual_Q	0.2	0.2	1000000	1	-25	1000
ReplicateIngyFigure9/62_6_2	none	False	0	False	GridWorld	ISR	FullObsDiscrete	Individual_Q	0.2	0.2	1000000	2	-25	1000
ReplicateIngyFigure9/63_6_3	none	False	0	False	GridWorld	ISR	FullObsDiscrete	Individual_Q	0.2	0.2	1000000	3	-25	1000
ReplicateIngyFigure9/64_6_4	none	False	0	False	GridWorld	ISR	FullObsDiscrete	Individual_Q	0.2	0.2	1000000	4	-25	1000
ReplicateIngyFigure9/65_6_5	none	False	0	False	GridWorld	ISR	FullObsDiscrete	Individual_Q	0.2	0.2	1000000	5	-25	1000
ReplicateIngyFigure9/66_6_6	none	False	0	False	GridWorld	ISR	FullObsDiscrete	Individual_Q	0.2	0.2	1000000	6	-25	1000
ReplicateIngyFigure9/67_6_7	none	False	0	False	GridWorld	ISR	FullObsDiscrete	Individual_Q	0.2	0.2	1000000	7	-25	1000
ReplicateIngyFigure9/68_6_8	none	False	0	False	GridWorld	ISR	FullObsDiscrete	Individual_Q	0.2	0.2	1000000	8	-25	1000
ReplicateIngyFigure9/69_6_9	none	False	0	False	GridWorld	ISR	FullObsDiscrete	Individual_Q	0.2	0.2	1000000	9	-25	1000
ReplicateIngyFigure9/70_7_0	none	False	0	False	GridWorld	ISR	FullObsDiscrete	Individual_Q	0.2	0.2	1000000	0	-50	1000
ReplicateIngyFigure9/71_7_1	none	False	0	False	GridWorld	ISR	FullObsDiscrete	Individual_Q	0.2	0.2	1000000	1	-50	1000
ReplicateIngyFigure9/72_7_2	none	False	0	False	GridWorld	ISR	FullObsDiscrete	Individual_Q	0.2	0.2	1000000	2	-50	1000
ReplicateIngyFigure9/73_7_3	none	False	0	False	GridWorld	ISR	FullObsDiscrete	Individual_Q	0.2	0.2	1000000	3	-50	1000
ReplicateIngyFigure9/74_7_4	none	False	0	False	GridWorld	ISR	FullObsDiscrete	Individual_Q	0.2	0.2	1000000	4	-50	1000
ReplicateIngyFigure9/75_7_5	none	False	0	False	GridWorld	ISR	FullObsDiscrete	Individual_Q	0.2	0.2	1000000	5	-50	1000
ReplicateIngyFigure9/76_7_6	none	False	0	False	GridWorld	ISR	FullObsDiscrete	Individual_Q	0.2	0.2	1000000	6	-50	1000
ReplicateIngyFigure9/77_7_7	none	False	0	False	GridWorld	ISR	FullObsDiscrete	Individual_Q	0.2	0.2	1000000	7	-50	1000
ReplicateIngyFigure9/78_7_8	none	False	0	False	GridWorld	ISR	FullObsDiscrete	Individual_Q	0.2	0.2	1000000	8	-50	1000
ReplicateIngyFigure9/79_7_9	none	False	0	False	GridWorld	ISR	FullObsDiscrete	Individual_Q	0.2	0.2	1000000	9	-50	1000
ReplicateIngyFigure9/80_8_0	none	False	0	False	GridWorld	ISR	FullObsDiscrete	Individual_Q	0.2	0.2	1000000	0	-75	1000
ReplicateIngyFigure9/81_8_1	none	False	0	False	GridWorld	ISR	FullObsDiscrete	Individual_Q	0.2	0.2	1000000	1	-75	1000
ReplicateIngyFigure9/82_8_2	none	False	0	False	GridWorld	ISR	FullObsDiscrete	Individual_Q	0.2	0.2	1000000	2	-75	1000
ReplicateIngyFigure9/83_8_3	none	False	0	False	GridWorld	ISR	FullObsDiscrete	Individual_Q	0.2	0.2	1000000	3	-75	1000
ReplicateIngyFigure9/84_8_4	none	False	0	False	GridWorld	ISR	FullObsDiscrete	Individual_Q	0.2	0.2	1000000	4	-75	1000
ReplicateIngyFigure9/85_8_5	none	False	0	False	GridWorld	ISR	FullObsDiscrete	Individual_Q	0.2	0.2	1000000	5	-75	1000
ReplicateIngyFigure9/86_8_6	none	False	0	False	GridWorld	ISR	FullObsDiscrete	Individual_Q	0.2	0.2	1000000	6	-75	1000
ReplicateIngyFigure9/87_8_7	none	False	0	False	GridWorld	ISR	FullObsDiscrete	Individual_Q	0.2	0.2	1000000	7	-75	1000
ReplicateIngyFigure9/88_8_8	none	False	0	False	GridWorld	ISR	FullObsDiscrete	Individual_Q	0.2	0.2	1000000	8	-75	1000
ReplicateIngyFigure9/89_8_9	none	False	0	False	GridWorld	ISR	FullObsDiscrete	Individual_Q	0.2	0.2	1000000	9	-75	1000
ReplicateIngyFigure9/90_9_0	none	False	0	False	GridWorld	ISR	FullObsDiscrete	Individual_Q	0.2	0.2	1000000	0	-100	1000
ReplicateIngyFigure9/91_9_1	none	False	0	False	GridWorld	ISR	FullObsDiscrete	Individual_Q	0.2	0.2	1000000	1	-100	1000
ReplicateIngyFigure9/92_9_2	none	False	0	False	GridWorld	ISR	FullObsDiscrete	Individual_Q	0.2	0.2	1000000	2	-100	1000
ReplicateIngyFigure9/93_9_3	none	False	0	False	GridWorld	ISR	FullObsDiscrete	Individual_Q	0.2	0.2	1000000	3	-100	1000
ReplicateIngyFigure9/94_9_4	none	False	0	False	GridWorld	ISR	FullObsDiscrete	Individual_Q	0.2	0.2	1000000	4	-100	1000
ReplicateIngyFigure9/95_9_5	none	False	0	False	GridWorld	ISR	FullObsDiscrete	Individual_Q	0.2	0.2	1000000	5	-100	1000
ReplicateIngyFigure9/96_9_6	none	False	0	False	GridWorld	ISR	FullObsDiscrete	Individual_Q	0.2	0.2	1000000	6	-100	1000
ReplicateIngyFigure9/97_9_7	none	False	0	False	GridWorld	ISR	FullObsDiscrete	Individual_Q	0.2	0.2	1000000	7	-100	1000
ReplicateIngyFigure9/98_9_8	none	False	0	False	GridWorld	ISR	FullObsDiscrete	Individual_Q	0.2	0.2	1000000	8	-100	1000
ReplicateIngyFigure9/99_9_9	none	False	0	False	GridWorld	ISR	FullObsDiscrete	Individual_Q	0.2	0.2	1000000	9	-100	1000
ReplicateIngyFigure9/100_10_0	none	False	0	False	GridWorld	SUNY	FullObsDiscrete	Individual_Q	0.2	0.2	1000000	0	0	1000
ReplicateIngyFigure9/101_10_1	none	False	0	False	GridWorld	SUNY	FullObsDiscrete	Individual_Q	0.2	0.2	1000000	1	0	1000
ReplicateIngyFigure9/102_10_2	none	False	0	False	GridWorld	SUNY	FullObsDiscrete	Individual_Q	0.2	0.2	1000000	2	0	1000
ReplicateIngyFigure9/103_10_3	none	False	0	False	GridWorld	SUNY	FullObsDiscrete	Individual_Q	0.2	0.2	1000000	3	0	1000
ReplicateIngyFigure9/104_10_4	none	False	0	False	GridWorld	SUNY	FullObsDiscrete	Individual_Q	0.2	0.2	1000000	4	0	1000
ReplicateIngyFigure9/105_10_5	none	False	0	False	GridWorld	SUNY	FullObsDiscrete	Individual_Q	0.2	0.2	1000000	5	0	1000
ReplicateIngyFigure9/106_10_6	none	False	0	False	GridWorld	SUNY	FullObsDiscrete	Individual_Q	0.2	0.2	1000000	6	0	1000
ReplicateIngyFigure9/107_10_7	none	False	0	False	GridWorld	SUNY	FullObsDiscrete	Individual_Q	0.2	0.2	1000000	7	0	1000
ReplicateIngyFigure9/108_10_8	none	False	0	False	GridWorld	SUNY	FullObsDiscrete	Individual_Q	0.2	0.2	1000000	8	0	1000
ReplicateIngyFigure9/109_10_9	none	False	0	False	GridWorld	SUNY	FullObsDiscrete	Individual_Q	0.2	0.2	1000000	9	0	1000
ReplicateIngyFigure9/110_11_0	none	False	0	False	GridWorld	SUNY	FullObsDiscrete	Individual_Q	0.2	0.2	1000000	0	-25	1000
ReplicateIngyFigure9/111_11_1	none	False	0	False	GridWorld	SUNY	FullObsDiscrete	Individual_Q	0.2	0.2	1000000	1	-25	1000
ReplicateIngyFigure9/112_11_2	none	False	0	False	GridWorld	SUNY	FullObsDiscrete	Individual_Q	0.2	0.2	1000000	2	-25	1000
ReplicateIngyFigure9/113_11_3	none	False	0	False	GridWorld	SUNY	FullObsDiscrete	Individual_Q	0.2	0.2	1000000	3	-25	1000
ReplicateIngyFigure9/114_11_4	none	False	0	False	GridWorld	SUNY	FullObsDiscrete	Individual_Q	0.2	0.2	1000000	4	-25	1000
ReplicateIngyFigure9/115_11_5	none	False	0	False	GridWorld	SUNY	FullObsDiscrete	Individual_Q	0.2	0.2	1000000	5	-25	1000
ReplicateIngyFigure9/116_11_6	none	False	0	False	GridWorld	SUNY	FullObsDiscrete	Individual_Q	0.2	0.2	1000000	6	-25	1000
ReplicateIngyFigure9/117_11_7	none	False	0	False	GridWorld	SUNY	FullObsDiscrete	Individual_Q	0.2	0.2	1000000	7	-25	1000
ReplicateIngyFigure9/118_11_8	none	False	0	False	GridWorld	SUNY	FullObsDiscrete	Individual_Q	0.2	0.2	1000000	8	-25	1000
ReplicateIngyFigure9/119_11_9	none	False	0	False	GridWorld	SUNY	FullObsDiscrete	Individual_Q	0.2	0.2	1000000	9	-25	1000
ReplicateIngyFigure9/120_12_0	none	False	0	False	GridWorld	SUNY	FullObsDiscrete	Individual_Q	0.2	0.2	1000000	0	-50	1000
ReplicateIngyFigure9/121_12_1	none	False	0	False	GridWorld	SUNY	FullObsDiscrete	Individual_Q	0.2	0.2	1000000	1	-50	1000
ReplicateIngyFigure9/122_12_2	none	False	0	False	GridWorld	SUNY	FullObsDiscrete	Individual_Q	0.2	0.2	1000000	2	-50	1000
ReplicateIngyFigure9/123_12_3	none	False	0	False	GridWorld	SUNY	FullObsDiscrete	Individual_Q	0.2	0.2	1000000	3	-50	1000
ReplicateIngyFigure9/124_12_4	none	False	0	False	GridWorld	SUNY	FullObsDiscrete	Individual_Q	0.2	0.2	1000000	4	-50	1000
ReplicateIngyFigure9/125_12_5	none	False	0	False	GridWorld	SUNY	FullObsDiscrete	Individual_Q	0.2	0.2	1000000	5	-50	1000
ReplicateIngyFigure9/126_12_6	none	False	0	False	GridWorld	SUNY	FullObsDiscrete	Individual_Q	0.2	0.2	1000000	6	-50	1000
ReplicateIngyFigure9/127_12_7	none	False	0	False	GridWorld	SUNY	FullObsDiscrete	Individual_Q	0.2	0.2	1000000	7	-50	1000
ReplicateIngyFigure9/128_12_8	none	False	0	False	GridWorld	SUNY	FullObsDiscrete	Individual_Q	0.2	0.2	1000000	8	-50	1000
ReplicateIngyFigure9/129_12_9	none	False	0	False	GridWorld	SUNY	FullObsDiscrete	Individual_Q	0.2	0.2	1000000	9	-50	1000
ReplicateIngyFigure9/130_13_0	none	False	0	False	GridWorld	SUNY	FullObsDiscrete	Individual_Q	0.2	0.2	1000000	0	-75	1000
ReplicateIngyFigure9/131_13_1	none	False	0	False	GridWorld	SUNY	FullObsDiscrete	Individual_Q	0.2	0.2	1000000	1	-75	1000
ReplicateIngyFigure9/132_13_2	none	False	0	False	GridWorld	SUNY	FullObsDiscrete	Individual_Q	0.2	0.2	1000000	2	-75	1000
ReplicateIngyFigure9/133_13_3	none	False	0	False	GridWorld	SUNY	FullObsDiscrete	Individual_Q	0.2	0.2	1000000	3	-75	1000
ReplicateIngyFigure9/134_13_4	none	False	0	False	GridWorld	SUNY	FullObsDiscrete	Individual_Q	0.2	0.2	1000000	4	-75	1000
ReplicateIngyFigure9/135_13_5	none	False	0	False	GridWorld	SUNY	FullObsDiscrete	Individual_Q	0.2	0.2	1000000	5	-75	1000
ReplicateIngyFigure9/136_13_6	none	False	0	False	GridWorld	SUNY	FullObsDiscrete	Individual_Q	0.2	0.2	1000000	6	-75	1000
ReplicateIngyFigure9/137_13_7	none	False	0	False	GridWorld	SUNY	FullObsDiscrete	Individual_Q	0.2	0.2	1000000	7	-75	1000
ReplicateIngyFigure9/138_13_8	none	False	0	False	GridWorld	SUNY	FullObsDiscrete	Individual_Q	0.2	0.2	1000000	8	-75	1000
ReplicateIngyFigure9/139_13_9	none	False	0	False	GridWorld	SUNY	FullObsDiscrete	Individual_Q	0.2	0.2	1000000	9	-75	1000
ReplicateIngyFigure9/140_14_0	none	False	0	False	GridWorld	SUNY	FullObsDiscrete	Individual_Q	0.2	0.2	1000000	0	-100	1000
ReplicateIngyFigure9/141_14_1	none	False	0	False	GridWorld	SUNY	FullObsDiscrete	Individual_Q	0.2	0.2	1000000	1	-100	1000
ReplicateIngyFigure9/142_14_2	none	False	0	False	GridWorld	SUNY	FullObsDiscrete	Individual_Q	0.2	0.2	1000000	2	-100	1000
ReplicateIngyFigure9/143_14_3	none	False	0	False	GridWorld	SUNY	FullObsDiscrete	Individual_Q	0.2	0.2	1000000	3	-100	1000
ReplicateIngyFigure9/144_14_4	none	False	0	False	GridWorld	SUNY	FullObsDiscrete	Individual_Q	0.2	0.2	1000000	4	-100	1000
ReplicateIngyFigure9/145_14_5	none	False	0	False	GridWorld	SUNY	FullObsDiscrete	Individual_Q	0.2	0.2	1000000	5	-100	1000
ReplicateIngyFigure9/146_14_6	none	False	0	False	GridWorld	SUNY	FullObsDiscrete	Individual_Q	0.2	0.2	1000000	6	-100	1000
ReplicateIngyFigure9/147_14_7	none	False	0	False	GridWorld	SUNY	FullObsDiscrete	Individual_Q	0.2	0.2	1000000	7	-100	1000
ReplicateIngyFigure9/148_14_8	none	False	0	False	GridWorld	SUNY	FullObsDiscrete	Individual_Q	0.2	0.2	1000000	8	-100	1000
ReplicateIngyFigure9/149_14_9	none	False	0	False	GridWorld	SUNY	FullObsDiscrete	Individual_Q	0.2	0.2	1000000	9	-100	1000
ReplicateIngyFigure9/150_15_0	none	False	0	False	GridWorld	MIT	FullObsDiscrete	Individual_Q	0.2	0.2	1000000	0	0	1000
ReplicateIngyFigure9/151_15_1	none	False	0	False	GridWorld	MIT	FullObsDiscrete	Individual_Q	0.2	0.2	1000000	1	0	1000
ReplicateIngyFigure9/152_15_2	none	False	0	False	GridWorld	MIT	FullObsDiscrete	Individual_Q	0.2	0.2	1000000	2	0	1000
ReplicateIngyFigure9/153_15_3	none	False	0	False	GridWorld	MIT	FullObsDiscrete	Individual_Q	0.2	0.2	1000000	3	0	1000
ReplicateIngyFigure9/154_15_4	none	False	0	False	GridWorld	MIT	FullObsDiscrete	Individual_Q	0.2	0.2	1000000	4	0	1000
ReplicateIngyFigure9/155_15_5	none	False	0	False	GridWorld	MIT	FullObsDiscrete	Individual_Q	0.2	0.2	1000000	5	0	1000
ReplicateIngyFigure9/156_15_6	none	False	0	False	GridWorld	MIT	FullObsDiscrete	Individual_Q	0.2	0.2	1000000	6	0	1000
ReplicateIngyFigure9/157_15_7	none	False	0	False	GridWorld	MIT	FullObsDiscrete	Individual_Q	0.2	0.2	1000000	7	0	1000
ReplicateIngyFigure9/158_15_8	none	False	0	False	GridWorld	MIT	FullObsDiscrete	Individual_Q	0.2	0.2	1000000	8	0	1000
ReplicateIngyFigure9/159_15_9	none	False	0	False	GridWorld	MIT	FullObsDiscrete	Individual_Q	0.2	0.2	1000000	9	0	1000
ReplicateIngyFigure9/160_16_0	none	False	0	False	GridWorld	MIT	FullObsDiscrete	Individual_Q	0.2	0.2	1000000	0	-25	1000
ReplicateIngyFigure9/161_16_1	none	False	0	False	GridWorld	MIT	FullObsDiscrete	Individual_Q	0.2	0.2	1000000	1	-25	1000
ReplicateIngyFigure9/162_16_2	none	False	0	False	GridWorld	MIT	FullObsDiscrete	Individual_Q	0.2	0.2	1000000	2	-25	1000
ReplicateIngyFigure9/163_16_3	none	False	0	False	GridWorld	MIT	FullObsDiscrete	Individual_Q	0.2	0.2	1000000	3	-25	1000
ReplicateIngyFigure9/164_16_4	none	False	0	False	GridWorld	MIT	FullObsDiscrete	Individual_Q	0.2	0.2	1000000	4	-25	1000
ReplicateIngyFigure9/165_16_5	none	False	0	False	GridWorld	MIT	FullObsDiscrete	Individual_Q	0.2	0.2	1000000	5	-25	1000
ReplicateIngyFigure9/166_16_6	none	False	0	False	GridWorld	MIT	FullObsDiscrete	Individual_Q	0.2	0.2	1000000	6	-25	1000
ReplicateIngyFigure9/167_16_7	none	False	0	False	GridWorld	MIT	FullObsDiscrete	Individual_Q	0.2	0.2	1000000	7	-25	1000
ReplicateIngyFigure9/168_16_8	none	False	0	False	GridWorld	MIT	FullObsDiscrete	Individual_Q	0.2	0.2	1000000	8	-25	1000
ReplicateIngyFigure9/169_16_9	none	False	0	False	GridWorld	MIT	FullObsDiscrete	Individual_Q	0.2	0.2	1000000	9	-25	1000
ReplicateIngyFigure9/170_17_0	none	False	0	False	GridWorld	MIT	FullObsDiscrete	Individual_Q	0.2	0.2	1000000	0	-50	1000
ReplicateIngyFigure9/171_17_1	none	False	0	False	GridWorld	MIT	FullObsDiscrete	Individual_Q	0.2	0.2	1000000	1	-50	1000
ReplicateIngyFigure9/172_17_2	none	False	0	False	GridWorld	MIT	FullObsDiscrete	Individual_Q	0.2	0.2	1000000	2	-50	1000
ReplicateIngyFigure9/173_17_3	none	False	0	False	GridWorld	MIT	FullObsDiscrete	Individual_Q	0.2	0.2	1000000	3	-50	1000
ReplicateIngyFigure9/174_17_4	none	False	0	False	GridWorld	MIT	FullObsDiscrete	Individual_Q	0.2	0.2	1000000	4	-50	1000
ReplicateIngyFigure9/175_17_5	none	False	0	False	GridWorld	MIT	FullObsDiscrete	Individual_Q	0.2	0.2	1000000	5	-50	1000
ReplicateIngyFigure9/176_17_6	none	False	0	False	GridWorld	MIT	FullObsDiscrete	Individual_Q	0.2	0.2	1000000	6	-50	1000
ReplicateIngyFigure9/177_17_7	none	False	0	False	GridWorld	MIT	FullObsDiscrete	Individual_Q	0.2	0.2	1000000	7	-50	1000
ReplicateIngyFigure9/178_17_8	none	False	0	False	GridWorld	MIT	FullObsDiscrete	Individual_Q	0.2	0.2	1000000	8	-50	1000
ReplicateIngyFigure9/179_17_9	none	False	0	False	GridWorld	MIT	FullObsDiscrete	Individual_Q	0.2	0.2	1000000	9	-50	1000
ReplicateIngyFigure9/180_18_0	none	False	0	False	GridWorld	MIT	FullObsDiscrete	Individual_Q	0.2	0.2	1000000	0	-75	1000
ReplicateIngyFigure9/181_18_1	none	False	0	False	GridWorld	MIT	FullObsDiscrete	Individual_Q	0.2	0.2	1000000	1	-75	1000
ReplicateIngyFigure9/182_18_2	none	False	0	False	GridWorld	MIT	FullObsDiscrete	Individual_Q	0.2	0.2	1000000	2	-75	1000
ReplicateIngyFigure9/183_18_3	none	False	0	False	GridWorld	MIT	FullObsDiscrete	Individual_Q	0.2	0.2	1000000	3	-75	1000
ReplicateIngyFigure9/184_18_4	none	False	0	False	GridWorld	MIT	FullObsDiscrete	Individual_Q	0.2	0.2	1000000	4	-75	1000
ReplicateIngyFigure9/185_18_5	none	False	0	False	GridWorld	MIT	FullObsDiscrete	Individual_Q	0.2	0.2	1000000	5	-75	1000
ReplicateIngyFigure9/186_18_6	none	False	0	False	GridWorld	MIT	FullObsDiscrete	Individual_Q	0.2	0.2	1000000	6	-75	1000
ReplicateIngyFigure9/187_18_7	none	False	0	False	GridWorld	MIT	FullObsDiscrete	Individual_Q	0.2	0.2	1000000	7	-75	1000
ReplicateIngyFigure9/188_18_8	none	False	0	False	GridWorld	MIT	FullObsDiscrete	Individual_Q	0.2	0.2	1000000	8	-75	1000
ReplicateIngyFigure9/189_18_9	none	False	0	False	GridWorld	MIT	FullObsDiscrete	Individual_Q	0.2	0.2	1000000	9	-75	1000
ReplicateIngyFigure9/190_19_0	none	False	0	False	GridWorld	MIT	FullObsDiscrete	Individual_Q	0.2	0.2	1000000	0	-100	1000
ReplicateIngyFigure9/191_19_1	none	False	0	False	GridWorld	MIT	FullObsDiscrete	Individual_Q	0.2	0.2	1000000	1	-100	1000
ReplicateIngyFigure9/192_19_2	none	False	0	False	GridWorld	MIT	FullObsDiscrete	Individual_Q	0.2	0.2	1000000	2	-100	1000
ReplicateIngyFigure9/193_19_3	none	False	0	False	GridWorld	MIT	FullObsDiscrete	Individual_Q	0.2	0.2	1000000	3	-100	1000
ReplicateIngyFigure9/194_19_4	none	False	0	False	GridWorld	MIT	FullObsDiscrete	Individual_Q	0.2	0.2	1000000	4	-100	1000
ReplicateIngyFigure9/195_19_5	none	False	0	False	GridWorld	MIT	FullObsDiscrete	Individual_Q	0.2	0.2	1000000	5	-100	1000
ReplicateIngyFigure9/196_19_6	none	False	0	False	GridWorld	MIT	FullObsDiscrete	Individual_Q	0.2	0.2	1000000	6	-100	1000
ReplicateIngyFigure9/197_19_7	none	False	0	False	GridWorld	MIT	FullObsDiscrete	Individual_Q	0.2	0.2	1000000	7	-100	1000
ReplicateIngyFigure9/198_19_8	none	False	0	False	GridWorld	MIT	FullObsDiscrete	Individual_Q	0.2	0.2	1000000	8	-100	1000
ReplicateIngyFigure9/199_19_9	none	False	0	False	GridWorld	MIT	FullObsDiscrete	Individual_Q	0.2	0.2	1000000	9	-100	1000
