# Supplementary material
Source: ML conference proceedings conference paper supplement (https://proceedings.neurips.cc/paper_files/paper/2022/hash/57444e14ecd9e2c8f603b4f012ce3811-Abstract.html)
Supplement: Supplementary file 1 [file 57444e14ecd9e2c8f603b4f012ce3811-Supplemental-Conference.zip › 3410_shield_decentralization_for_sa-Supplementary Material/README]

Requirements

1. Conda environment CentralizedVerification with python 3.8 and requirements.txt
2. Conda environment CentralizedVerificationPython2 with `pip install simplejson`
3. Clone the submodule https://github.com/VerifiableRobotics/slugs in lib/slugs, and build according to the directions there


Note that these will need to be modified to reproduce some of the tables or figures, as they refer to personal accounts:

- experiments/analysis/create_training_curves.py
- experiments/analysis/create_experiment_table.py
