# Supplementary material
Source: ML conference proceedings conference paper supplement (https://proceedings.neurips.cc/paper_files/paper/2022/hash/57444e14ecd9e2c8f603b4f012ce3811-Abstract.html)
Supplement: Supplementary file 1 [file 57444e14ecd9e2c8f603b4f012ce3811-Supplemental-Conference.zip › 3410_shield_decentralization_for_sa-Supplementary Material/requirements.txt]

-f https://download.pytorch.org/whl/cu113/torch_stable.html
torch==1.10.0+cu113
torchvision==0.11.0+cu113
torchaudio==0.10.0+cu113
jupyter
tqdm
matplotlib
gym
networkx
flloat
pythomata
numpy
git+https://github.com/openai/maddpg.git
wandb
pandas
