# Supplementary material
Source: ML conference proceedings conference paper supplement (https://proceedings.neurips.cc/paper_files/paper/2022/hash/57444e14ecd9e2c8f603b4f012ce3811-Abstract.html)
Supplement: Supplementary file 1 [file 57444e14ecd9e2c8f603b4f012ce3811-Supplemental-Conference.zip › 3410_shield_decentralization_for_sa-Supplementary Material/shields/general_shield.structuredslugs]

[INPUT]
# 22 = 0
rel_pos_x:0...44

# 9 = 0
rel_pos_y:0...18

agent_0_xmove:0...2
agent_0_ymove:0...2
agent_1_xmove:0...2
agent_1_ymove:0...2

# 0=noop, 1=up, 2=right, 3=down, 4=left
agent_0_action:0...4
agent_1_action:0...4

violation

[OUTPUT]


[ENV_INIT]
(rel_pos_x = 0) & (rel_pos_y = 0)


[SYS_TRANS]

[SYS_LIVENESS]

[ENV_TRANS]
# Agents either move with the action, or don't move
agent_0_xmove' = 1 | (agent_0_action'=2 & agent_0_xmove' = 2) | (agent_0_action'=4 & agent_0_xmove' = 0)
agent_0_ymove' = 1 | (agent_0_action'=3 & agent_0_ymove' = 2) | (agent_0_action'=1 & agent_0_ymove' = 0)

agent_1_xmove' = 1 | (agent_1_action'=2 & agent_1_xmove' = 2) | (agent_1_action'=4 & agent_1_xmove' = 0)
agent_1_ymove' = 1 | (agent_1_action'=3 & agent_1_ymove' = 2) | (agent_1_action'=1 & agent_1_ymove' = 0)

rel_pos_x' + agent_1_xmove' = rel_pos_x + agent_0_xmove'
rel_pos_y' + agent_1_ymove' = rel_pos_y + agent_0_ymove'

violation' <-> (rel_pos_x'=22 & rel_pos_y'=9) | (rel_pos_y=9 & rel_pos_y'=9 & rel_pos_x=21 & rel_pos_x'=23) | (rel_pos_y=9 & rel_pos_y'=9 & rel_pos_x=23 & rel_pos_x'=21) | (rel_pos_x=22 & rel_pos_x'=22 & rel_pos_y=8 & rel_pos_y'=10) | (rel_pos_x=22 & rel_pos_x'=22 & rel_pos_y=10 & rel_pos_y'=8)
! violation

# Don't go out of bounds
rel_pos_x = 44 -> agent_0_action != 4 & agent_1_action != 2
# rel_pos_x = 44 -> ! (agent_0_action = 4 & agent_1_action = 2)
rel_pos_x = 0 -> agent_0_action != 2 & agent_1_action != 4
# rel_pos_x = 0 -> ! (agent_0_action = 2 & agent_1_action = 4)
rel_pos_y = 18 -> agent_0_action != 1 & agent_1_action != 3
# rel_pos_y = 18 -> ! (agent_0_action = 1 & agent_1_action = 3)
rel_pos_y = 0 -> agent_0_action != 3 & agent_1_action != 1
# rel_pos_y = 0 -> ! (agent_0_action = 3 & agent_1_action = 1)
