# Supplementary material
Source: ML conference proceedings conference paper supplement (https://proceedings.neurips.cc/paper_files/paper/2022/hash/57444e14ecd9e2c8f603b4f012ce3811-Abstract.html)
Supplement: Supplementary file 1 [file 57444e14ecd9e2c8f603b4f012ce3811-Supplemental-Conference.zip › 3410_shield_decentralization_for_sa-Supplementary Material/shields/general_shield_small.structuredslugs]

[INPUT]
# 2 = 0
rel_pos_x:0...4

# 2 = 0
rel_pos_y:0...4

agent_0_xmove:0...2
agent_0_ymove:0...2
agent_1_xmove:0...2
agent_1_ymove:0...2

# 0=noop, 1=up, 2=right, 3=down, 4=left
agent_0_action:0...4
agent_1_action:0...4

violation

[OUTPUT]


[ENV_INIT]
(rel_pos_x = 0) & (rel_pos_y = 0)


[SYS_TRANS]

[SYS_LIVENESS]

[ENV_TRANS]
# Agents either move with the action, or don't move
agent_0_xmove' = 1 | (agent_0_action'=2 & agent_0_xmove' = 2) | (agent_0_action'=4 & agent_0_xmove' = 0)
agent_0_ymove' = 1 | (agent_0_action'=3 & agent_0_ymove' = 2) | (agent_0_action'=1 & agent_0_ymove' = 0)

# shield0 -> agent_0_xmove'=1
# shield0 -> agent_0_ymove'=1
# shield1 -> agent_1_xmove'=1
# shield1 -> agent_1_ymove'=1

agent_1_xmove' = 1 | (agent_1_action'=2 & agent_1_xmove' = 2) | (agent_1_action'=4 & agent_1_xmove' = 0)
agent_1_ymove' = 1 | (agent_1_action'=3 & agent_1_ymove' = 2) | (agent_1_action'=1 & agent_1_ymove' = 0)

rel_pos_x' + agent_1_xmove' = rel_pos_x + agent_0_xmove'
rel_pos_y' + agent_1_ymove' = rel_pos_y + agent_0_ymove'

(rel_pos_x'=2 & rel_pos_y'=2) | (rel_pos_y=2 & rel_pos_y'=2 & rel_pos_x=1 & rel_pos_x'=3) | (rel_pos_y=2 & rel_pos_y'=2 & rel_pos_x=3 & rel_pos_x'=1) | (rel_pos_x=2 & rel_pos_x'=2 & rel_pos_y=1 & rel_pos_y'=3) | (rel_pos_x=2 & rel_pos_x'=2 & rel_pos_y=3 & rel_pos_y'=1) <-> violation'

! violation

rel_pos_x = 4 -> agent_0_action != 4 & agent_1_action != 2
rel_pos_x = 0 -> agent_0_action != 2 & agent_1_action != 4
rel_pos_y = 4 -> agent_0_action != 1 & agent_1_action != 3
rel_pos_y = 0 -> agent_0_action != 3 & agent_1_action != 1
